# Supplementary material for: Highly Distinct Microbial Communities in Elevated Strings and Submerged Flarks in the Boreal Aapa-Type Mire
Source: MDPI journal article supplement (doi:10.3390/microorganisms10010170), 2022-01-13
Supplement: s1 [file s1]

## Rarefaction curve of the observed OTUs

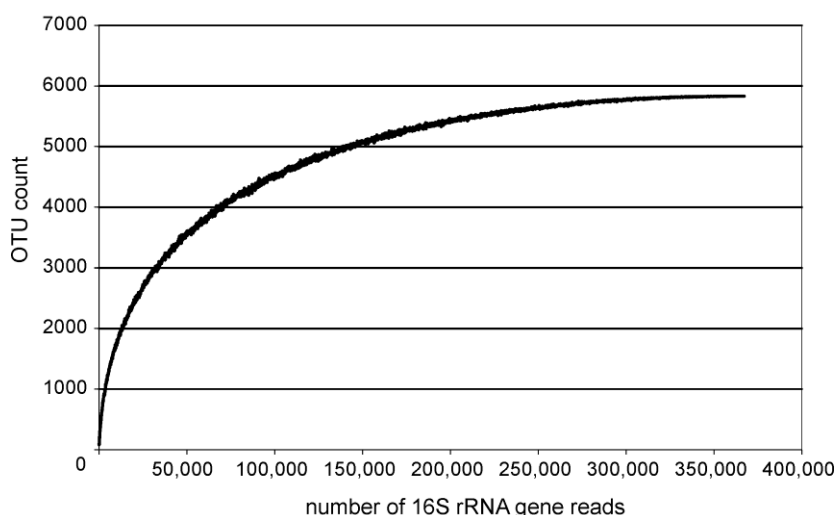

## OTU sequences

>Otu1

```
CCAGCCTATGGGGGGCAGCAGTAAGGAATATTGGACAATGGTGGCAACACTGATCCAGCC
ATGCCGCGTG CAGGATGAAGGCGCTACGCGTTGTAAACTGCTTTTGTACCAGAGAAAACC
TATCTACGTGTAGATAGCTGATAGTATGGTAAGAATAAGCATCGGCTAACTTCGTGCCAG
CAGCCGCGGTAATACGAAGGATGCAAGCGTTATCCGGATTTATTGGGTTTAAAGGGTGCG
TAGGCGGACTTATAAGTCAGTGGTGAAATCTCGTCGCTTAACGACGAACGTGCCATTGAT
ACTGTAGGTCTTGAGTACAGATGCCGTTGGCGGAATGTGTCATGTAGCGGTGAAATGCAT
AGATATGACACAGAACACCGATTGCGAAGGCAGCTGACGAAACTGTAAGTACGCTGAGG
CACGAAAGCGTGGGGATCAAACAGGATTAGATACCCCAGTAGTCC
```

>Otu2

```
CCAGCCTATGGGGGGCAGCAGTGGGGAATATTGGACAATGGGCGCAAGCCTGATCCAGCC
ATGCCGCGTGAGTGATGAAGGCCCTAGGGTTGTAAAGCTCTTTTGTGCGGGAAGATAATG
ACGGTACCGCAAGAATAAGCCCCGGCTAACTTCGTGCCAGCAGCCGCGGTAATACGAAGG
GGGCTAGCGTTGCTCGGAATCACTGGGCGTAAAGGGTGCGTAGGCGGGTCTTTAAGTCAG
GGGTGAAATCCTGGAGCTCAACTCCAGAACTGCCTTTGATACTGAGGATCTTGAGTTCGG
GAGAGGTGAGTGGAAGTGCAGTGTAGAGGTGAAATTCGTAGATATTTCGCAAGAACACCA
GTGGCGAAGGCGGCTCACTGGCCCCATACTGACGCTGAGGCACGAAAGCGTGGGGAGCAA
ACAGGATTAGAAACCCTAGTAGTCC
```

>Otu3

```
CCAGCCTATGGGGGGCAGCAGCTAAGAATATTCCGCAATGGGAGAAATCCTGACGGAGCG
ACGCCGCGTGGAAGATGAAGGCCGAAAGGTTGTAAATTCCTTTTATACGGAAGAATAAG
TGTATTGAGAGAAACGGTGATGATGACGGTACCGTATGAATAAGCCCCGGCTAACTACG
TGCCAGCAGCCGCGGTAATACGTAGGGGGCAAGCGTTGTTTCGGATTCATTGGGCGTAAAG
GGCATGTAGGCTGTTATGTAAAGTGTGGATTTAAAGGCGGAGGCTTAACCTCTAGTTTGGT
CTGCAAACTGCGTAGCTTGAGTGTAGAAGGGGAACTGGAATTCGCGGTGTAGGGGTGAA
ATCTGTAGATATGCGGAAGAATACCTGTGGCGAAGGCGAGTTTCTGGTCTATAACTGACG
CTGAAATGCGAAAGTGTGGGTAGCAAACAGGATTAGAAACCCCAGTAGTCC
```

>Otu4

```
CCAGCCTATGGGGGGCACCAGGCGCGAAAACTTTACAATGCGGGAAACCGTGATAGGGGA
ACTCTGAGTGCCCGTTAAATCGGGCTGTCCATCAGTTTAAATAACTGGTGAAGAAAGGGC
CGGGCAAGACCGGTGCCAGCCGCCGCGGTAATACCGGCGGCTCGAGTGGTGGCCACTATT
ACTGGGCTTAAAGCGTTTCGTAGCTGGTTTGTAAAGTCTCTGGGGAAATCTTCCGGCTTAA
CCGGAAGGCGTCTCAGGGATACTGGCAGACTAGGGACCGGGAGAGGTGAGGGGTACTCCA
GGGCTAGGAGTGAAATCCTGTAATCCTTGGGGGACCACCTGTGGCGAAGGCGCCTCACCA
GAACGGCTCCGACAGTGAGGGACGAAAGCTGGGGGAGCAAACCGGATTAGATACCCCCGT
AGTCC
```

>Otu5

CCAGCCTATGGGGGGCAGCAGCTAAGAATATTCCGCAATGGACGAAAGTCTGACGGAGCG  
ACGCCGCGTGATGACGAAGGCCGAAAGGTTGTAAAGTCTTTTTGTTGGGGAAGAATAAC  
CATGGGAGGGAATGCCCCGTGGGATGACATGAACCGACGAATAAGCCCCGGCTAACTACGT  
GCCAGCAGCCGCGGTAACACGTAGGGGGCGAGCGTTGTTTCGGAATTACTGGGCGTAAAGG  
GCATGTAGGCGGCTTTGTAAAGCCCGCGGTGGAAGCCACGGCTCAACCGTGGGATTGCGT  
TGGGAACCTGCGAGGCTTGAATCATGGAGAGGGAGCTAGAATTCCTGGTGTAGGGGTGAAA  
TCTGTAGAGATCAGGAAGAATACCAGTGGCGAAGGCGAGCTCCTGGCCAATGATTGACGC  
TGAGGTGCGAAAGTGTGGGGATCAAACAGGATTAGATAACCCCGTAGTCC

>Otu6

CCAGCCTATGGGGGGCACCAGTCGCGAAAACTTTGCAATAAGCGAAAGCTTGACAGGGCT  
ATCCCGAGTGCCATCCGCTGAGGAAGGCTTTTACCCAGTCTAGAACGCTGGGGGAATAAG  
GAGAGGGCAAGTCTGGTGTACGCCGCCGCGGTAATACCAGCTCTCCGAGTGGTGTGGATG  
TTTATTGGGCCTAAAGCATCCGTAGCTGGCTAGGTTAGTCCCCTGTTAAATCCACCGAAT  
TAATCGTTGGATTGCGGGGGATACTGCTTGGCTAGGGGACGAGAGAGGCAGACGGTATTT  
CCGGGGTAGGGGTGAAATCCTATAATCCCGGGAAGACCACCAGTGGCGAAGGCTGTCTGC  
TAGAACCGCGCCCGACGGTGAGGGATGAAAGCTGGGGGAGCGAACC GGATTAGATAACCTC  
GTAGTCC

>Otu7

CCAGCCTATGGGGGGCAGCAGTGGGGAATATTGGACAATGGGCGCAAGCCTGATCCAGCC  
ATGCCGCGTGAGTGAAGAAGGCCTTAGGGTTGTAAAGCTCTTTTGGCGGGGACGATAATG  
ACGGTACCCGCGAGAATAAGCCCCGGCTAACTTCGTGCCAGCAGCCGCGGTAATACGAAGG  
GGGCTAGCGTTGTTTCGGAATCACTGGGCGTAAAGCGTACGCAGGCGGATTGATAAGTCAG  
GGGTGAAATCCCGGAGCTCAACTTCGGAATTGCCTTTGATACTGTCTATCTTCGAGTTTCG  
GGAGAGGTTGGCGGAATTCTTAGTGTAGAGGTGAAATTCGTAGATATTAGGAAGAACACC  
AGTGGCGAAGGCGGCCAACTGGCCCGATACTGACGCTCATGTACGAAAGCGTGGGGAGCA  
AACAGGATTAGAAACCCCGTAGTCC

>Otu8

CCAGCCTATGGGGGGCAGCAGTCGCGAAAACTTCACAATGGGGGCAACCCCGATGAGGGGA  
ATTCCAAGTGCTAGCACTTTTTTGTGTTAGCTGTTCTTTTTGTCTAAAAACAAGAGAAGTA  
AGGGCCGGGTAAGACGGGTGCCAGCCGCCGCGGTAATACCCGCGGCCCGAGTGGTGGTCG  
ATATTATTGAGCCTAAAACGTTTCGTAGCCGGTCTTGTAAATCCTTGGGTAAATCGGCCAG  
CTTAAGTGTCCGAAGTCCGGGGAGACTGCAAGACTTGGGATCGGGAGAGGTCAGAGGTAC  
TTCTGGGGTAGGGGTAAAATCCTGTAATCCTAGAAGGACCACCGGTGGCGAAGGCGTCTG  
ACTAGAACGAATTCGACGGTGAGGAACGAAGCCCTGGGGCGCAAACGGGATTAGATAACC  
CAGTAGTCC

>Otu9

CCAGCCTATGGGGGGCTGCAGTAGGGAATATTGGTAATCTGCGAAAGCGGGAACCAGCAA  
CGCCGCGTGTCGATGAAGGCCTTCGGGTCTGTAAAGCACTTTTTGAGGGGACGAGGAAGG  
ACGGTACCCTCAGAATAAGTCTCGGCTAACTACGTGCCAGCAGCCGCGGTAACACGTAGG  
AGACGAGCGTTATCCGGATTTACTGGGCGTAAAGCGCGTGCAGGCGGTTTGGTAAGTTGG  
ATGTGAAAGCTCCCGGCTTAACTGGGAGAGGTCGTTCAATACTGCCAGACTAGAGGATGG  
TAGAGGGAGGTGGAATTCTGGGTGTAGTGGTGAATGCGTAGATATCCAGAGGAACACCA  
GTGGCGAAAGCGGCCTCCTGGACCATTTCTGACGCTCATACGCGAAAGCTAGGGTAGCAA  
ACGGGATTAGATAACCCAGTAGTCC

>Otu10

CCAGCCTATGGGGGGCAGCAGTAGGGAATATTGGGCAATGGGCGAAAGCCTGACCCAGCA  
ACGCCGCGTGACAGATGAAGGTCTTCGGATCGTAAAGTGCTTTTCTGAGAGATGAGAAAG  
GACAGTATCTCAGGAATAAGTCTCGGCTAACTACGTGCCAGCAGCCGCGGTAACACGTAG  
GAGGCAAGCGTTATCCGGATTTACTGGGCGTAAAGCGCATGCAGGTGGTTCGGTAAGTTG  
GATGTGAAAGCTCCTGGCTCAACTGGGAGAGGTCGTTCAATACTACCGGACTTGAGAGCA  
GTAGAGGAAGGTGGAATTCCCGGTGTAGTGGTGAATGCGTAGATATCGGGAGGAACACC  
AGTGGCGAAAGCGGCCTTCTGGACTGTTTCTGACACTCATATGCGAAAGCTAGGGTAGCA  
AACGGGATTAGAAACCCGAGTAGTCC

>Otu11

CCAGCCTACGGGTGGCAGCAGGCGCGAAAACTTTGCAATGCGGGAAACCGTGACAAGGGA  
ACTCTGAGTGCCCGTAAAATCGGGCTGTCCATCGGTTTAAAAAACCGGTGAAGAAAGGGC  
CGGGCAAGACCGGTGCCAGCCGCCGCGGTAATACCGGCGGCTCGAGTGGTGGCCACTATT

ACTGGGCTTAAAGCGTTCGTAGCTGGTTTGTAAAGTCTCTGGGGAAATCTTCCGGCTTAA  
CCGGAAGGCGTCTCAGGGATACTGGCAGACTAGGGACCGGGAGAGGTGAGAGGTACTCCA  
GGGGTAGGAGTGAAATCCTGTAATCCTTGGGGGACCACCTGTGGCGAAGGCGTCTCACCA  
GAACGGCTCCGACAGTGAGGGACGAAAGCTGGGGGAGCAAACCGGATTAGATACCCGAGT  
AGTCC

>Otu13

CCAGCCTACGGGGTGCAGCAGTAGGGAATATTGGACAATGGGCGAGAGCCTGATCCAGCC  
ATGCCGCGTGCAGGAAGAAGGCCTTCTGGGTGTAAACTGCTTTTGCCAGGGGATAAAAG  
ACCCGTGCGCGGGGAATTGAAGGTACCTGGTGAATAAGCCACGGCTAACTACGTGCCAGC  
AGCCGCGGTAAATACGTAGGTGGCAAGCGTTGTCCGATTTATTGGGTTTAAAGGGTGCCT  
AGGCGGCCCTGTAAGTCAGTGGTGAATACGGCAGCTCAACTGTGAGGTGCCATTGATA  
CTGCAGGGCTTGAGTACAGACGAGGTAGGCGGAATTGACGGTGTAGCGGTGAAATGCTTA  
GATATCGTCAAGAACACCGATAGCGAAGGCAGCTTACTAGGCTGTAAGTACGCTGAGGC  
ACGAAAGTGTGGGGATCAAACAGGATTAGATACCCCCGTAGTCC

>Otu15

CCAGCCTATGGGGGGCAGCAGTGGGGAATATTGCGCAATGGGGGAAACCCTGACGCAGCA  
ACGCCGCGTGAGTGAAGAAGGCCTTCGGGTGTAAAGCTCTTTCGGTTGGGAAGAAGGGG  
AGCACAGTTAATAAGTGTGTTCTTTGATGGTACCAAAGAAGAAGCACCGGCAAACCTTCG  
TGCCAGCAGCCGCGTAATACGAAGGGTGCAGCGTTGTTTCGGAATTACTGGGCGTAAAG  
GGTTCGTAGGCGGGAATGCAAGTCAAGTGTGAAATCCCCAGGCTCAACCTGGGACGTGCA  
TTTGAGACTGTGTTTCTTGAGTTTCGGAGAGGGTGGTGAATTGCTGGTGTAGGAGTGAC  
ATCCGTAGAGATCAGCAGGAACACCGGAGGCGAAGGCGACCACCTGGCCGAATACTGACG  
CTGAGGAACGAAAGCGTGGGGAGCAAACAGGATTAGATACCCCCGTAGTCC

>Otu16

CCAGCCTATGGGGGGCAGCAGTGGGGAATTTTTCGCAATGGGGGAAACCCTGACGCAGCA  
ACGCCGCGTGAGGATGAAGCCCCTTGGGGCGTAAACTCCTTTCGACCAAGACGATAATG  
ACGGTACTGGTGGAAGAAGCACCGGCTAACTCTGTGCCAGCAGCCGCGGTAATACAGAGG  
GTGCGAGCGTTGTTTCGGAATTATTGGGCGTAAAGGGTGCCTAGGCGGTGCCACAAGTCAC  
TTGTGAAATCCCCAGGCTTAACCTGGGGCCTGCAGGCGAAACTGTGGTGTGAGTATGG  
GAGAGGTGCGTGGAATTCCTGGTGTAGCGGTGAAATGCGTAGATATCGGGAGGAACACCT  
GTGGCGAAAGCGGCGCACTGGACCATAACTGACGCTGATGCACGAAAGCTAGGGGAGCAA  
ACAGGATTAGAAACCCCCGTAGTCC

>Otu17

CCAGCCTACGGGGGGCAGCAGTAGGGAATATTGGTAATGTGCGAAAGCGCGAACCAGCAA  
CGCCGCGTGCACGATGAAGGCCTTCGGGTGTAAAGTGCTTTTAGAGAGGATGAGGAAGG  
ACAGTACTCTCTGAATAAGCCTCGGCTAACTACGTGCCAGCAGCCGCGGTAAAACGTAGG  
AGGCAAGCGTTATCCGATTTACTGGGCGTAAAGCGCGTGTAGGTGGTTTTGTAAAGTTGG  
ATGTGAAAGCTCCCGCTTAACCTGGGAGAGGTCGTTCAAACTACAAGACTTGAGAGTGG  
TAGAGGAAGGTGGAATTCGGGTGTAGTGGTGAATGCGTAGATATCCGGAGGAACACCA  
GTGGCGAAAGCGGCCTTCTGGACCATTTCTGACACTGATACGCGAAAGCTAAGGTAGCAA  
ACGGGATTAGATACCCCAGTAGTCC

>Otu18

CCAGCCTATGGGTGGCAGCAGGCGCGAAAACTCTACAATGCAGGCAACTGCGATAGGGGA  
ACATCGAGTGGCATCCACCATGGATGTCTGTCCAATCGTCTAAAAAACGATTGTCAGCAA  
GGGCCGGGCAAGACCGGTGCCAGCCGCCGCGTAATACCGGCGGCTCGAGTGGTGGCCGA  
TATTATTGAGTCTAAAGGGTCCGTAGCCGGCTTTGCAAGTCCTATGGGAAATCCAGCGGC  
TTAACC GTTGGGCTTTCATGGGATACTACATTGCTTGGGACTGGGAGAGGTAGGAGGTAC  
TCAGGGGGTAGGGGTGAAATCCTGTAATCCTTTGGGGACACCGGTGGCGAAGGCGTCTT  
ACCAGAACAGGTCCGACGGTGAGGGACGAAAGCTAGGGGCACGAACCGGATTAGAAACCC  
GAGTAGTCC

>Otu19

CCAGCCTATGGGGGGCAGCAGGCGCGAAAACTTTACAATGCGAGCAATCGTGATAAGGGA  
ACTCCGAGTGCTGTAAATCAGGCTGTCCGCCAGTGTAATAACTGGTGAAGAAAGGGC  
CGGGCAAGACCGGTGCCAGCCGCCGCGTAATACCGGCGGCTCGAGTGGTGGCCACTATT  
ACTGGGCTTAAAGCGTTCGTAGCTGGTCTGTAAAGTCTCTGGGGAAATCTTCCGGCTTAA  
CCGGAAGGCGTCTCAGGGATACTGGCAGACTAGGGACCGGAAGAGGTGAGAGGTACTCCA  
GGGGTAGGAGTGAAATCCTGTAATCCTTGGGGGACCACCTGTGGCGAAGGCGTCTCACCA  
GGACGGCTCCGACAGTGAGGAACGAAAGCTGGGGGAGCAAACCGGATTAGATACCCCCGT

AGTCC

>Otu20

CCAGCCTACGGGGGGCAGCAGTGGGGAATTTTGCGCAATGGGGGAAACCCTGACGCAGCA  
ACGCCGCGTGAGGATGAAGCTCCTTGGAGTGTAAGCTCCTTTTCGACCGGGAATTTATG  
ATGGTACCGGTGGAAGAAGCACC GGCTAACTCTGTGCCAGCAGCCGCGTAATACAGAGG  
GTGCGAGCGTTGTTTCGGAATTATTGGGCGTAAAGGGCGCGTAGGCGGTGTTGTAAGTCAC  
CTGTGAAACCTCTGGGCTTAACTCAGAGCCTGCAGGCGAAACTGCAATGCTGGAGGGTGG  
GAGAGGTGCGTGGAATTCCTGGTGTAGCGGTGAAATGCGTAGATATCGGGAGGAACACCT  
GTGGCGAAAGCGGCGCACTGGACCACTACTGACGCTGAGGCGCGAAAGCTAGGGGAGCAA  
ACAGGATTAGATACCCGAGTAGTCC

>Otu21

CCAGCCTACGGGGGGCACCAGGCGCGAAAACTTTACAATGCGAGAAATCGTGATAAGGGA  
ACTCTGAGTGCCCGTAAATCGGGCTGTCCATCTGTTTAAATAACAGGTGAAGAAAGGGC  
CGGGCAAGACCGGTGCCAGCCGCGCGGTAATACCGGCGGCTCGAGTGGTGGCCACTATT  
ACTGGGCTTAAAGCGTCCGTAGCTGGTCTGTTAAGTCTCTGGGGAAATCTTCCGGCTCAA  
CCGGAAGGCGTCTCAGGGATACTGGCAGACTAGGGACCGGGAGAGGTGAGAGGTACTCCA  
GGGGTAGGAGTGAAATCCTGTAATCCTTGGGGGACCACCTGTGGCGAAGGCGTCTCACCA  
GAACGGCTCCGACAGTGAGGGACGAAAGCTGGGGGAGCAAACCGGATTAGATACCCGCGT  
AGTCC

>Otu22

CCAGCCTATGGGGGGCAGCAGTGAGGAATATTGCGCAATGGACGAAAGTCTGACGCAGCG  
ACGCCGCGTGAGGATGAAGGCTCTTTGAGTCGTAAACTTCTGTAGAGAGGGAAGAATGT  
CCCGTTCTTCGGGATTGACGGTACCTCTAAAGTAAGGATCGGCCAACTACGTGCCAGCAG  
CCGCGGTAATACGTAGGATCCGAGCGTTGTCCGGAATCACTGGGTGTAAAGGGAGCGCAG  
GCGGGCTTTCAAGTCGGTGGTGAAATCTTACAGCTTAACTGTAAACTGCCTCCGATACT  
GCAAGTCTTGAGTGTGGAAGAGGGCGATGGAATTCATGGTGTAGCGGTGAAATGCGTAGA  
TATCATGAAGAACACCGGTGCGGAAGGCGGTCGCTGGTCCATTACTGACGCTCATGCTC  
GAAAGTGTGGGGAGCAAACAGGATTAGAGACCCGAGTAGTCC

>Otu23

CCAGCCTATGGGGGGCAGCAGCAAGGAATAGTAGGCAATGGGCGAAAGCCTGACCTCGCG  
ACGCCGCGTGAGGATGAAGGCCTTCGGGTGCTAAACTTCTTTTCTCGGGGATGAATAAT  
GACAGTACTCGGGGAATAAGTCACGGCTAACTACGTGCCAGCAGCCGCGTAAGACGTAG  
GTGGCTAGCGTTATCCGGATTTACTGGGCGTAAAGAGTGCGCAGGCGGCCTTTCAAGTCA  
GATGTAAATCTCCCGGCTCAACTGGGAGGGACCATTTGATACTGTTTGGCTAGAGTACA  
GCAGAGGGAAGTGGAATTCCTGGTGTAGTGGTGGAAATGCGTAGATATCGGGAGGAACACC  
AGTGGCGAAAGCGGCTTTCTGGGCTGTTACTGACGCTGTTGCACGAAAGCGTGGGGAGCA  
AACAGGATTAGATACCCCTGTAGTCC

>Otu24

CCAGCCTATGGGAGGCAGCAGTGGGGAATATTGGACAATGGGGGAAACCCTGATCCAGCG  
ACGCCGCGTGAGTGGAAGAAGGCCTGCGGGTTGTAAAGCACTTTTAGTGGGGACAAAAAGC  
TACGGATTAATACTTCGTGGTCTTGATTTAACCCAAAGAAAAAGCACCGGCTAACTCTGT  
GCCAGCAGCCGCGTAATACAGAGGGTGCGAGCGTTAATCGGAATTACTGGGCGTAAAGC  
GCGCGTAGACGGTTTTGTAAAGTCAGATGTGAAATCCCCGGGCTCAACCTGGGAAGTGCAT  
TTGAGACTGCATGGCTAGAGTATCGAAGAGGGAAGTGGAATTTCCGGTGTAGCGGTGAAA  
TGCGTAGATATCGGAAGGAACACCAGTGCGGAAAGCGACTTCCTGGTGAATACTGACGT  
TCATGTGCGAAAGCGTGGGGAGCAAACAGGATTAGATACCCAGTAGTCC

>Otu25

CCAGCCTACGGGGGGCAGCAGTGGGGAATATTGGACAATGGGCGCAAGCCTGATCCAGCC  
ATGCCGCGTGAGTGATGACGGCCTTAGGGTTGTAAAGCTCTTTCGCCAGGGACGATAATG  
ACGGTACCTGGATAAGAAGCCCCGGCTAACTTCGTGCCAGCAGCCGCGTAATACGAAGG  
GGGCTAGCGTTGTTTCGGAATTACTGGGCGTAAAGCGCGTGTTAGGCGGGTCTTTAAGTCAG  
GGGTGAAATGCCAAGGCTCAACCTTGGAAGTGCCTTTGATACTGGAGATCTTGAGTCCGG  
GAGAGGTGAGTGGAAGTGCAGTGTAGAGGTGAAATTCGTAGATATTCGCAAGAACACCA  
GTGGCGAAGGCGGCTCACTGGCCCGGAAGTACGCTGAGACGCGAAAGCGTGGGGAGCAA  
ACAGGATTAGAAACCCGTGTAGTCC

>Otu26

CCAGCCTATGGGGGGCAGCAGTAAGGAATATTGGACAATGGTGGCAACACTGATCCAGCC  
ATGCCGCGTGAGGATGAAGGCGCTACGCGTTGTAAAGTGCCTTTGTACGGGAGAAAACC

CTGCTACGTGTAGCAGGCTGATAGTACCGTAAGAATAAGCATCGGCTAACTTCGTGCCAG  
CAGCCGCGGTAATACGAAGGATGCAAGCGTTATCCGGATTTATTGGGTTTAAAGGGAGCG  
TAGGCGGACTTATAAGTCAGTGGTGAAATCTCGTTGCTTAACAACGAACGTGCCATTGAT  
ACTGTAGGTCTTGAGTACAGATGATGTTGGCGGAATGTGTCATGTAGCGGTGAAATGCTT  
AGATATGACACAGAACACCGATTGCGAAGGCAGCTGACAAAACGTAACTGACGCTGAGG  
CTCGAAAGCGTGGGGATCAAACAGGATTAGAAACCCTTGTAGTCC

>Otu27

CCAGCCTATGGGGGGCAGCAGTGGGGAATCTTGCGCAATGGGCGAAAGCCTGACGCAGCA  
ACGCCGCGTGAGGACGAAGGCTTTCTGAGTTGTAAACTCCTTTCAGCAGGGACGATTGT  
GACGGTACCTGCAGAAGAAGCACCGGCCAACTACGTGCCAGCAGCCGCGGTGATACGTAG  
GGTGCAAGCGTTGTCCGATTTATTGGGCGTAAAGAGCTCGTAGGCGGTTTGATTAGTCG  
GGTGTGAAACCTCCAGGCTTAACCTGGAGCCGCCACTCGATACTGTCATGACTAGAATTC  
GGTAGGGGACCACGAATTCTGGTGTAGCGGTGAAATGCGCAGATATCAGGAGGAACAC  
CAGCAGCGAAGGCGGTGGTCTGGGCCGACATTGACGCTGAGGAGCGAAAGCGTGGGGAGC  
GAACAGGATTAGAAACCCCCGTAGTCC

>Otu28

CCAGCCTATGGGGGGCTGCAGTGGGGAATCTTGCAACAATGGGGGAACCCCTGATGCAGCG  
ACGCCGCGTGAGCGATGAAGCCCTTCGGGGTGTAAGCTCTTTCGTCAGGGAAGATAGTG  
ACGGTACCTGGAGAAGCAGCTGCGGCTAACTACGTGCCAGCAGCCGCGGTAATACGTAGG  
CAGCAAGCGTTGTTCCGAGTTACTGGGCGTAAAGGGTGTGTAGGCGGTTCTTTAAGTTCG  
CTGTGAAATCTCCCGGCTTAACCGGGAGGGTGCGGTGAATACTGAGGGACTAGAGTACGG  
GAGAGGAAAGTGGAATTCCTGGTGTAGCGGTGAAATGCGTAGATATCAGGAGGAACACCG  
GTGGTGTAGACGGCTTTCTGGACCGTAACTGACGCTGAGACACGAAAGCGTGGGTAGCAA  
ACAGGATTAGAAACCCCCGTAGTCC

>Otu29

CCAGCCTACGGGTGGCACCAGTGGGGAATCTTGCGCAATGGACGAAAGTCTGACGCAGCA  
ACGCCGCGTGAGGGACGAAGGCTTTCTGAGTTGTAAACCTCTTTCGACAGGAACGATTGT  
GACGGTACCTGTAGAAGAAGCACCGGCCAACTATGTGCCAGCAGCCGCGGTGATACATAG  
GGTGCGAGCGTTATTCGATTTATTGGGCGTAAAGAGCTCGTAGGCGGTTTCGACAAGTCG  
GGTGTTAAACCCCCAGGCTCAACCTGGGGCCGCCACCCGAAACTGTTGTGACTAGAGTTT  
GGTAGGGGATCACGAATTCTGGTGTAGCGGTGGAATGCGCAGATATCAGGAGGAACAC  
CAGTAGCGAAGGCGGTGATCTGGGCCAATACTGACGCTGAGGAGCGAAAGCGTGGGGAGC  
GAACAGGATTAGAGACCCCAGTAGTCC

>Otu30

CCAGCCTACGGGGGGCAGCAGTGGGGAATATTGGACAATGGGCGCAAGCCTGATCCAGCC  
ATGCCGCGTGAGTGATGACGGCCCTAGGGTTGTAAAGCTCTTTCACCCACGACGATAATG  
ACGGTAGTGGGAGAAGAAGCCCCGGCTAACTTCGTGCCAGCAGCCGCGGTAATACGAAGG  
GGGCTAGCGTTGTTCCGATTTACTGGGCGTAAAGCGCACGTAGGCGGATCTTTAAGTCAG  
GGGTGAAATGCCGAGGCTCAACTTCGGAATGCCTTTGATACTGGAGATCTTGAGTTCGG  
GAGAGGTGAGTGGAATGCGAGTGTAGAGGTGAAATTCGTAGATATTCGCAAGAACACCA  
GTGGCGAAGGCGGCTCACTGGCCCCATACTGACGCTGAGGTGCGAAAGCGTGGGGAGCAA  
ACAGGATTAGATACCCGCGTAGTCC

>Otu31

CCAGCCTATGGGGGGCAGCAGTAAGGAATATTGGACAATGGTGGCAACACTGATCCAGCC  
ATGCCGCGTGAGGATGAAGGCGCTACGCGTTGTAAACTGCTTTTGTACGGGAGAAAACC  
CTCGCTCGTGAGCGAGGCTGATAGTACCGTAAGAATAAGCATCGGCTAACTTCGTGCCAG  
CAGCCGCGGTAATACGAAGGATGCAAGCGTTATCCGGATTTATTGGGTTTAAAGGGAGCG  
TAGGCGGTTTTATAAGTCAGTGGTGAAATCTCGTTGCTTAACAACGAACGTGCCATTGAT  
ACTGTAGAACTTGAGTACAGATGATGTTGGCGGAATGTGTCATGTAGCGGTGAAATGCTT  
AGATATGACACAGAACACCGATTGCGAAGGCAGCTGACAAAACGTAACTGACGCTGAGG  
CTCGAAAGCGTGGGGATCAAACAGGATTAGATACCCGAGTAGTCC

>Otu32

CCAGCCTATGGGTGGCAGCAGTGGGGAATCTTGCAACAATGGACGAAAGTCTGATGCAGCA  
ACGCCGCGTGGGGGATGAAGCTTTTCGGAGTGTAACCCCTTTCGACCCGGAAGAATGCC  
CGCAAGGGCTTGACGGTACGGGTATAAGAAGCCCCGGCTAACTACGTGCCAGCAGCCGCG  
GTAATACGTAGGGGGCCAGCGTTGCTCGGAATTACTGGGCGTAAAGGGTCTGTAGGCGGT  
GTAGCAAGTCGGTAGTGAAATCCCTGGGCTTAACCCAGGGGCTGCTAACGAAACTGCTAT  
GCTAGAGTGTGAGAGAGGCAAGTGGAATTACGGGTGTAGCGGTGAAATGCGTAGATATCC

GTAGGAACATCCGAGGCGAAGGCGGCTTGCTGGATCACAACTGACGCTGAGAGACGAAAAG  
CTAGGGGAGCAAACAGGATTAGAAACCCCCGTAGTCC

>Otu33

CCAGCCTATGGGGCGCACCCAGTAGGGGATATTGGTAATCTACGCAAGTGGGAACCAGCAA  
CGCCGCGTGACGATGACGGCCTTCGGGTGTAAAGTCCTTTTCAGTGGGAAGAGGAAGG  
ACGGTACCACTGGAATAAGCCTCGGCTAACTACGTGCCAGCAGCCGCGGTAAAACGTAGG  
AGGCGAGCGTTATCCGGATTTACTGGGTGTAAAGCGCATGCAGGCGGCTCGTTAAGTTGG  
GTGTGAAAGCTTCCGGCTCAACTGGGAGAGGTTGCTCAAGACTGGCGAGCTAGAGAGTGG  
TAGGGGAAGGCGGAATTCCGGGTGTAGTGGTGAAATGCGTAGAGATCCGGAGGAACACCA  
GTGGCGAAGGCGGCCTTCTGGGCCACGACTGACGCTCAGATGCGACAGCTAGGGGAGCAA  
ACGGGATTAGAAACCCGAGTAGTCC

>Otu34

CCAGCCTACGGGGGGCAGCAGTGGGGAATATTGGACAATGGGGCGAAAGCCTGATCCAGCA  
ATGCCGCGTGAGTGATGAAGGCCTTAGGGTTGTAAAGCTCTTTCGGGTGGGACGATGATG  
ACGGTACCACCAGAAGAAGCCCCGGCTAACTTCGTGCCAGCAGCCGCGGTAAATACGAAGG  
GGGCTAGCGTTGTTTCGAATTACTGGGCGTAAAGCGCACGCAGGCGGCTCGATAAATTAG  
AAGTGAAAGCCTTGGGCTTAACCTGAGAATTGCTTTTAAGACTGTTCGAGCTAGAATCCAG  
AAGAGGGTAGTGGAATTCCGAGTGTAGAGGTGAAATTCGTAGATATTCGGAAGAACACCA  
GTGGCGAAGGCGACTACCTGGTCTGGCATTGACGCTCATGTGCGAAAGCGTGGGGAGCAA  
ACAGGATTAGATACCCGAGTAGTCC

>Otu35

CCAGCCTACGGGGTGCTGCAGTGGGGAATTTTGCGCAATGGGGGAAACCCTGACGCAGCA  
ACGCCGCGTGAGTGATGAAGCCCTTGGGGTGTAAGCTCCTTTCGATCGGGAAGATAATG  
ACGGTACCGATATAAGAAGCCCCGGCTAACTTCGTGCCAGCAGCCGCGGTAAATACGAGGG  
GGGCAAGCGTTGTTTCGAATTATTGGGCGTAAAGGGTGCGTAGGCGGTTTGACAAGTCTG  
ATGTGAAATCTATGGGCTCAACCCATAGTCTGCATCGGAAACTGTTCGGGCTTGAGTATGG  
GAGAGGTGAGTGGAATTTCCGGTGTAGCGGTGAAATGCGTAGATATTCGGAAGGAACACCT  
GTGGCGAAAGCGGCTCACTGGACCATTACTGACGCTGAGGCACGAAAGCTAGGGGAGCAA  
ACAGGATTAGAAACCCCTCGTAGTCC

>Otu36

CCAGCCTATGGGAGGCAGCAGTGGGGAATTTTGCGCAATGGGGGAAACCCTGACGCAGCA  
ACGCCGCGTGAGTGATGAAGCCCTTCGGGTGTAAGCTCTGTTCAGAGGGAAAGAAGTGT  
AGGAGGGTTAATACCCCTTTTATTTGACGGTACCCTCAAAGGAAGCACCGGCTAACTCCG  
TGCCAGCAGCCGCGGTAAATACGGAGGGTGCGAGCGTTGTTTCGAATTATTGGGCGTAAAG  
CGCGTGTAGGCGGTTTTTTAAGTCTGATGTGAAAGCCCTGGGCTCAACCCGGAAGTGCA  
TTGGAAACTGGGAGACTTGAATACGGGAGAGGGTAGTGGAATTCCTGGTGTAGGAGTGAA  
ATCCGTAGATATCAGGAGGAACACCGGTGGCGAAGGCGGCTACCTGGACCGATATTGACG  
CTGAGACGCGAAAGCGTGGGGAGCAAACAGGATTAGATACCCCTGTAGTCC

>Otu37

CCAGCCTACGGGGGGCAGCAGTCGGGAATTTTGCTCAATGGGGCGCAAGCCTGAAGCAGCA  
ACGCCGCGTGGGGGATGACGGCCTTCGGGTGTAAACCTCTTTTCCCGGGGACGATGATG  
ACGGTACTCGGGGAATAAGTCACGGCTAACTACGTGCCAGCAGCCGCGGTAAATACGTAGG  
TGACGAGCGTTGTCCGATTTACTGGGCGTAAAGAGCGCGCAGGCGGTCGTACAAGTCGA  
GTGTGAAATCCCCCGGCTCAACTGGGGAACGTCGCTCGATACTGTTTCGACTTGAAGGCGG  
GAGAGGGAAGCGGAATTCCTGGTGTAGTGGTGAAATGCGTAGATATCGGGAGGAACACCA  
GTGGCGAAGGCGGCTTTCTGGCCCCTTCTTGACGCTGAGGCGCGAAAGCTAGGGTAGCAA  
ACGGGATTAGAAACCCAGTAGTCC

>Otu38

CCAGCCTATGGGGCGCTGCAGTGGGGAATCTTGACAATGGGGGAAACCCTGATGCAGCG  
ACGCCGCGTGAGCGATGAAGCCCTTCGGGTGTAAAGCTCTTTCGGCAGGGACGATAATG  
ACGGTACCTGCAGAAGAAGCTGCGGCTAACTACGTGCCAGCAGCCGCGGTAAATACGTAGG  
CAGCAAGCGTTGTTTCGAATTACTGGGCGTAAAGAGTGCGTAGGCGGTTTGTTAAGTTTG  
GTGTGAAATCTCCCGGCTTAACCTGGGAGGGTGCGCCGAAAACCTGCCGGGCTAGAGTGTGG  
GATAGGGAAGTGGAATTCCTGGTGTAGCGGTGAAATGCGTAGATATCAGGAGGAACACCT  
GCGGTGTAGACGGCTTTCTGGACCACTACTGACGCTGAGGCACGAAAGCGTGGGGAGCAA  
ACAGGATTAGAAACCCAGTAGTCC

>Otu40

CCAGCCTATGGGGTGCTGCAGTCGGGAAAACCTTCGCAATGCACGTAAGTGTGACGAGGGA

ATTCTCAGTGCTTAGGTTATACCTAGGCTTTTGCCAAGAGCAAGAATCTTGGCGAATAAG  
TGGTGGGCAAGACCGGTGCCAGCCGCCGCGGTAACCCCGGCGCCACAAGTGGGAATCGCT  
ATTATTGGGTCTAAAGCATCCGTAGCCGGTCTGTAAATGCTCTGTGAAATCGTGGGGCT  
CAACTTCACGGTGTGCAGAGTACACTGACAGACTAGGGACCAGGAAAGGCGTTCGGTATT  
CCAGGGGGAGCGGTAAAATGTGATAATCCTTGGAGGACCACCAATGGCGAAGGCAGAACG  
CTAGAATGGATCCGACGGTGAGGGATGAAAGCTAGGGGAGCGATCCGGATTAGATACCCG  
TG TAGTCC

>Otu41

CCAGCCTATGGGGGGCAGCAGTAAGGAATATTGGTCAATGGACGCAAGTCTGAACCAGCC  
ATGCCGCGTGAGGATGAAGGCCCTCTGGGTGTAAACTTCTTTTATTGGGGAAGAAACC  
TGTTTTTTCTAAAGCAGTTGACGGTACCCGATGAATAAGCACCGGCTAACTCCGTGCCAG  
CAGCCGCGGTAATACGGAGGGTGCAAGCGTTATCCGGATTCAGTGGGTTTAAAGGGTGCG  
TAGGTGGGCAGGTAAGTCAGTGGTGAAATCTCTGGGCTTAACCCAGAAACTGCCGTTGAT  
ACTATCTGTCTTGAATGTAGTGGAGGTGAGCGGAATATGTCATGTAGCGGTGAAATGCTT  
AGATATGACATAGAACATCTATTGCGAAGGCAGCTCGCTACACTATTATTGACACTGAGG  
CACGAAAGCGTGGGGATCAAACAGGATTAGATACCCGAGTAGTCC

>Otu42

CCAGCCTATGGGGGGCAGCAGTGGGGAATCTTGCAATGGACGAAAGTCTGATGCAGCA  
ACGCCGCGTGAGGATGAAGCTTTTCGGAGTGTAACCCCTTTTCGACCCGGAAGAATGCC  
CGCAAGGGTTTGACGGTACGGGTATAAGAAGCCCCGGCTAACTACGTGCCAGCAGCCGCG  
GTAATACGTAGGGGGCCAGCGTTGCTCGGAATTACTGGGCGTAAAGGGTCCGTAGGCGGT  
GTGGCAAGTCGGGAGTGAAATCTCTGGGCTTAACCCAGAGGCTGCTTCCGAAACTGCCAT  
GCTAGAGTGTGAGAGAGGCGAGTGGAATTACGGGTGTAGCGGTGAAATGCGTAGATATCC  
GTAGGAACATCCGAGGCGAAGGCGGCTCGCTGGATCACAACTGACGCTGAGGGACGAAAG  
CTAGGGGAGCAAACAGGATTAGAAACCCCTGTAGTCC

>Otu43

CCAGCCTATGGGGGGCAGCAGTAAGGAATATTGGACAATGCTCGCAAGAGTGATCCAGCC  
ATGCCGCGTGCAAGAACGCGCCCTATGGGTGTAAACTGCTTTTGAACTAGAGAAAACC  
CTCCTACGTGTAGGAGGCTGATAGTATAGTTAGAATAAGCATCGGCTAACTTCGTGCCAG  
CAGCCGCGGTAAGACGAAGGATGCAAGCGTTATCCGGATTCATTGGGTTTAAAGGGAGCG  
TAGGTGGACTTATAAGTCAGTGGTGAAATCTTTGGGCTTAACCCAAAATTTGCCATTGAT  
ACTGTAGGTCTTGAGTACAGTTGCTGTGGGCGGAATATGACATGTAGTGGTGAAATACAT  
AGAGATGTCATAGAACACCGATTGCGAAGGCAGCTCACAAAGCTGTAAGTACACTGAGG  
CTCGAAAGTGCGGGGATCAAACAGGATTAGATACCCTTG TAGTCC

>Otu44

CCAGCCTACGGGTGGCAGCAGTCGAGAATTTTTCTCAATGGGCGAAAGCCTGAAGGAGCG  
ACGCCGCGTGAGGATGAATGGCTTCGGCCCGTAAACCCCTGTCATTTGCGAACAAATTA  
TTTTACCTAACACGTAAAGTATTGATTGTAGCGGAAGAGGAAGGGACGGCTAACTCTGTG  
CCAGCAGCCGCGGTAATACAGAGGTCCCAAGCGTTGTTTCGGATTCAGTGGGCGTAAAGGG  
TGCGTAGGCGGTAGGGTAAGTCTGTTGTGAAATCTCCGAGCTTAAGTCCGAAACTGCAAT  
GGAAACTATCCGACTAGAGGAATGGAGGGGAGACTGGAATACTTGGTGTAGCAGTGAAAT  
GCGTAGATATCAAGTGGAACACCAGTGGCGAAGGCGAGTCTCTGGACATTTCTCTGACGCT  
GAGGCACGAAAGCCAGGGGAGCAAACGGGATTAGATACCCAGTAGTCC

>Otu45

CCAGCCTATGGGGGGCACCAGTGGGGAATCTTGCAATGGAGGAAACTCTGATGCAGCG  
ACGCCGCGTGAGCGATGAAGCCCTTCGGGGTGTAAGCTCTTTTCGACGGGAACGATAATG  
ACGGTACCCGGAGAAGAAGCTGCGGCTAACTACGTGCCAGCAGCCGCGGTAATACGTAGG  
CAGCAAGCGTTGTTTCGGAATTACTGGGCGTAAAGAGTGTGTAGGCGGTTCTCTATGTTCCG  
GTGTGAAATCTCCCGGCTTAAGTGGGAGGGTGCGCCGAAACTGGAGGGCTTGAGTATGG  
GAGAGGAAAGCGGAATTCCTGGTGTAGCGGTGAAATGCGTAGATATCAGGAGGAACACCT  
GCGGTGTAGACGGCTTTCTGGACCATCACTGACGCTGAGACACGAAAGCGTGGGGAGCAA  
ACAGGATTAGAAACCCCGTAGTCC

>Otu46

CCAGCCTATGGGGGGCAGCAGTGGGGAATTTTGCGCAATGGGGGAAACCCTGACGCAGCA  
ACGCCGCGTGAGGATGAAGTCCCTTGGGACGTAAACTCCTTTTCGACTGGGAAGATAATG  
ACGGTACCAAGTGAAGAAGCCCCGGCTAACTTCGTGCCAGCAGCCGCGGTAATACGAGGG  
GGGCAAGCGTTGTTTCGGAATTATTGGGCGTAAAGGGCGCGTAGGCGGTGCGGTAAGTCAC  
CTGTGAAACCTCCGGGCTCAACCCGGAGCCTGCAGGCGAAACTGCCGTGCTTGAGGGTGG

GAGAGGTGCGTGGAATTCCTGGTGTAGCGGTGAAATGCGTAGATATCGGGAGGAACACCT  
GTGGCGAAAGCGGCGCACTGGACCACATCTGACGCTGAGGCGCGAAAGCTAGGGGAGCAA  
ACAGGATTAGATACCCCTAGTAGTCC

>Otu47

CCAGCCTATGGGGGGCAGCAGTGAGGAATTTTCGTCAATGGGGGCAACCCTGAACGAGCA  
ACGCCGCGTGAGGATGAAGGTTTTTCGGATCGTAAACTGCTTTTCTCTGGGACGAGAACG  
GACGGTACCAGAGGAATCAGCCCCGGCTAACTACGTGCCAGCAGCCGCGGTAATACGTAG  
GGGGCAAGCGTTGTCCGGATTTATTGGGCGTAAAGCGCACGCAGGCGGTCAGATCAGTCT  
GGGGTGACAGTCGTCCGCTCAACCGACGAAGTACTTCGGATACTGTCTGACTTGAGGGCT  
TCAGAGGGACACGGAATTCCGGGTGGAGTGGTGAAATGCGTAGATATCCGGAGGAACACC  
GATGGCGAAGGCAGTGTCTGGGAAGTACCTGACGCTCAGGTGCGAAAGCTAGGGGAGCG  
AACAGGATTAGATACCCAGTAGTCC

>Otu48

CCAGCCTATGGGGTGCAACCAGAACTAAGGCAGGCTGTTTTAAACCCCTTATTCTTTCAA  
ATATAATGACTGTACGTAGAACTCTTATCTTCTTATAAGCACTGGACTTGAAGAAAATCA  
TCAAATGTTTGACAGATAAGATCTTAAGTATTTTTGCATGTTGCTTTTTTACTTAAAAGA  
ACCAAGCCCGACTAACTTCGTGCAGCAGTCGCGGTAAACGGGGGGGTAGTGTTATTCTG  
TCATGACTGGGCGTAGGGAACGTAGGTGGATAGTTCAATATATCGTCAAAGACTGAGGAA  
GGCCCTCTTTAATCGATATTTGCTGATTATCTTGAGTTTTAACGGAGATCTATTGAACTG  
CAGCAGTAAAGGTTAAATTTGTTGATAATGTAGGATATTCTGAAGGCGAAAGATTTATCTA  
GTTAAATCTGACACTAAGGTTCAATGATGGGGTTCAAAGCGGATTAGAAACCCGAGTAG  
TCC

>Otu49

CCAGCCTACGGGGGGCAGCAGTGGGGAATCTTGGACAATGGGGGCAACCCTGATCCAGCC  
ATGCCGCGTGAGTGATGAAGGCCTTCGGGTGTAAACTCTTTCGACGGGGACGATAATG  
ACGGTACCCGTAGAAGAAGCTCCGGCTAACTTCGTGCCAGCAGCCGCGGTAATACGAAGG  
GGGCTAGCGTTGTTCCGAATTACTGGGCGTAAAGCGCGCGCAGGCGGCCTTTCAAGTCAG  
GGGTGAAAGCCCGGAGCTCAACTCCGGAATTGCCTTTGAACTGTAAAGCTTGAGTACGG  
GAGAGGTGAGTGGAATTCCTAGTGTAGAGGTGAAATTCGTAGATATTGGGAAGAACACCG  
GTGGCGAAGGCGGCTCACTGGCCCGTTACTGACGCTCAGGCGCGACAGCGTGGGGATCAA  
ACAGGATTAGATACCCCGTAGTCC

>Otu50

CCAGCCTATGGGTTGCAGCAGTGGGGAATATTGCGCAATGGGCGAAAGCCTGACGCAGCA  
ACGCCGCGTGGGGGATGAAGGTTCTCGGATTGTAAACCCCTTTTCGATCGGAACGAATCCC  
CCCCCGGTAAATAATCGGGGGGATCGACGGTACCGAGAGAAGAAGCCACGGCTAACTCTG  
TGCCAGCAGCCGCGGTAAGACAGAGGTGGCGAGCGTTGTTCCGATTTATTGGGCGTAAAG  
CGAACGCAGGCGGTTTGGTAAGTCAGAGGTGAAAGTCCACAGCTTAACTGTGGCACTGCC  
TTTGATACTGCCTTTCTTGAGTGCATGAGGGGGAAGCGGAATTCCGAGTGTAGAGGTGAA  
ATTCGTAGATATTCGAGGAACACCGGTGGCGAAGGCGGCTTCCTGGCATGTAACTGACG  
CTCATGTTGAAAGCGTGGGTAGCAAACAGGATTAGAAACCCCGTAGTCC

>Otu51

CCAGCCTATGGGGGGCAGCAGTGGGGAATTTGCGCAATGGAGGAAACTCTGATGCAGCG  
ACGCCGCGTGAGCGATGAAGCCCTCGGGGTGTAAAGCTCTTTCGGCAGGAACGATAATG  
ACGGTACCTGAAGAAGAAGCTGCGGCTAACTACGTGCCAGCAGCCGCGGTAATACGTAGG  
CAGCGAGCGTTGTTCCGAATTACTGGGCGTAAAGAGTGTGTAGGCGGTGCTCTAAGTTTG  
GTGTGAAATCTCCCGGCTCAACTGGGAGGGTGCGCCGAAACTGGGGTGCTCGAGCGTGG  
GAGAGGAAAGCGGAATTCCTGGTGTAGCGGTGAAATGCGTAGATATCAGGAGGAACACCT  
GTGGTGTAGACGGCTTTCTGGACCATTGCTGACGCTGAGACACGAAAGCGTGGGTAGCAA  
ACAGGATTAGATACCCCGTAGTCC

>Otu52

CCAGCCTATGGGGGGCAGCAGTGGGGAATTTGCGCAATGGGGGAAACCCTGACGCAGCA  
ACGCCGCGTGAGGATGAAGTCCTTCGGGACGTAAACTCCTTTCGATCGGGACGATAATG  
ACGGTACCGGAAGAAGAAGCCCCGGCTAACTTCGTGCCAGCAGCCGCGGTAATACGAGGG  
GGGCGAGCGTTGTTCCGAATTATTGGGCGTAAAGGGTGCGTAGGCGGTTTTGTAAAGTCTT  
ATGTGAAATCTATGGGCTCAACTCATAGACTGCATGAGAACTGCAGGGCTTGAGTGTGG  
GAGAGGTGAGTGGAATTTCCGGTGTAGCGGTGAAATGCGTAGATATCGGAAGGAACACCT  
GTGGCGAAAGCGGCTCACTGGACCACAACCTGACGCTGATGCACGAAAGCTAGGGGAGCAA  
ACAGGATTAGATACCCCGTAGTCC



>Otu53

CCAGCCTATGGGGGGCTGCAGTCGAGAATTTTTCTCAATGGGGGAAACCCTGAAGGAGCG  
ACGCCGCGTGGGGGATGAATGGCTTCGGCCCGTAAACCCCTGTCATTTGTGAACAAATTA  
ATTCACCTAACACGTGGATTATTGATTGTAACGAAAGAGGAAGGGACGGCTAACTCTGTG  
CCAGCAGCCGCGGTAATACAGAGGTCCCAAGCGTTGTTTCGATTCACTGGGCGTAAAGGG  
TGCGTAGGCGGTTGGGTAAGTTTGACGTGAAATCTCCGGGCCTAACCCGAAACTGCGTT  
GAATACTATCCGACTAGAGGAATGGAGGGGAGACTGGAATACTTGGTGTAGCAGTGAAAT  
GCGTAGATATCAAGTGGAACACCAGTGGCGAAGGCGAGTCTCTGGACATTTCTCTGACGCT  
GAGGCACGAAAGCCAGGGGAGCAAACGGGATTAGATACCCCCGTAGTCC

>Otu54

CCAGCCTATGGGGGGCAGCAGTGAGGAATTTTCGTCAATGGGGGAAACCCTGAACGAGCA  
ACGCCGCGTGCAGGAAGAAGGTTTTTCGGATCGTAAACTGCAAATCTCTGGGAAGAGAGAG  
GACGGTACCAGAGGAGAAGCCCCGGCTAACTACGTGCCAGCAGCCGCGGTAATACGTAGG  
GGGCGAGCGTTGTCCGGAGTTACTGGGCGTAAAGGGCACGCAGGCGGTCTGCTACGTTTCG  
GAGTGACAGTTGTCTAGCTTAACTGACAAAGGTCTTCGAAAACGGGTAGACTTGAGGCCTT  
GAGAGGGAGACGGAATTCGGGTGGAGCGGTGAAATGCGTAGAGATCCGGAGGAACACCG  
AAGGCGAAGGCAGTCTCCTGGCAAGGTACTGACGCTCAGGTGCGAAAGCTAGGGGAGCGA  
ACAGGATTAGAAACCCCAGTAGTCC

>Otu55

CCAGCCTATGGGGGGCAGCAGTGAGGAATATTGGTCAATGGACGGAAGTCTGAACCAGCC  
ATCCCGCGTGCAGGAAGAAGGCGCTATGCGTTGTAAACTGCTTTTCCGAGGGAAGAAAAC  
CCCCGACGCGTCGGGGCTTGCGCGGTACCTTGGGAATAAGCATCGGCTAACTCCGTGCCAG  
CAGCCGCGGTAATACGGAGGATGCGAGCGTTATCCGGATTCATTGGGTTTAAAGGGTGCG  
TAGGCGGACTGATAAGTCAGTGGTGAAAACCTGCAGCTTAACTGTAGAACTGCCATTGAT  
ACTGTCCGACTTGAGTATGGTCAAGGTAGGCGGAATGTGTAATGTAGCGGTGAAATGCTT  
AGATATTACACAGAACACCGATTGCGAAGGCAGCTTGCTGGGCCATTACTGACGCTGATG  
CACGAAAGCGTGGGGAGCAAACAGGATTAGAAACCCGCGTAGTCC

>Otu56

CCAGCCTACGGGATGCAGCAGTGGGGAATCTTGACACAATGCGCGAAAGCGTGATGCAGCA  
ACGCCGCGTGGGAGAAGAAGGCCTTCGGGTGTAAATCCCTTTTCAGTTGGGACGAAGCTT  
CGTCGGTTAATAGCCGTTTGAGTGACGGTACCTTCAGAAGAAGCCCCGGCTAACTACGT  
GCCAGCAGCCGCGTAATACGTAGGGGGCTAGCGTTGTCCGGAATCATTGGGCGTAAAGC  
GCGTGTAGGCGGCTCAACAAGTCTGCTGTGAAAGTCCAGGGCTCAACCCTGGAATGCCGG  
TGGAACCTGTTGGGCTAGAGTCCGGAAGGGGCGAGTGGAATTCCTGGTGTAGCGGTGAAA  
TGCGCAGATATCAGGAGGAACACCAATGGCGAAGGCAGCTCGCTGGGACGGTACTGACGC  
TGAGACGCGAAAGCGTGGGGAGCAAACAGGATTAGATAACCCTAGTAGTCC

>Otu57

CCAGCCTATGGGAGGCAGCAGTTGGGAATCTTGACACAATGGGGGAAACCCTGATCCAGCC  
ATGCCGCGTGAGTGATGAAGGCCTTCGGGTGTAAACTCTTTTCGACGGGGACGATAATG  
ACGGTACCCGTAGAAGAAGCTCCGGCTAACTTCGTGCCAGCAGCCGCGGTAATACGAAGG  
GGGCTAGCGTTGTTTCGGAATTACTGGGCGTAAAGCGCGCGCAGGCGGTCTTCCAAGTCAG  
TGGTGAAAGCCCCGAGCTCAACTCCGGAACCTGCCATTGAAACTGTGAGACTTGAGTACGA  
GAGAGGTGAGTGGAATTCACAGTGTAGAGGTGAAATTCGTAGATATTGGGAAGAACACCG  
GTGGCGAAGGCGGCTCACTGGCTCGTAACTGACGCTCAGGCGCGACAGCGTGGGGATCAA  
ACAGGATTAGAAACCCCCGTAGTCC

>Otu58

CCAGCCTATGGGGGGCTGCAGTAAGGAATATTGGACAATGGAGGCAACTCTGATCCAGCC  
ATGCCGCGTGCAGGAAGAAGGCGCTACGCGTTGTAAACTGCTTTTGTACCAGAGAAAACC  
TATGTACGTGTACGTAGTTGATAGTATGGTAAGAATAAGCATCGGCTAACTTCGTGCCAG  
CAGCCGCGGTAATACGAAGGATGCAAGCGTTATCCGGATTTATTGGGTTTAAAGGGAGCG  
TAGGCGGTCTTATAAGTCAGTGGTGAAATCTTGTCGCTTAACGACAAACGTGCCATTGAT  
ACTGTAGGACTTGAGTACAGATGCCGTTGGCGGAATGTGTTCATGTAGCGGTGAAATGCAT  
AGATATGACACAGAACACCGATTGCGAAGGCAGCTGACGAAACTGTAACCTGACGCTGAGG  
CTCGAAAGCGTGGGGATCAAACAGGATTAGATAACCCGTGTAGTCC

>Otu59

CCAGCCTACGGGAGGCAGCAGTGGGGAATATTGGACAATGGGCGCAAGCCTGATCCAGCC  
ATGCCGCGTGAGTGATGAAGGCCTTAGGGTTGTAAAGCTCTTTTAGCAGGGAAGATAATG  
ACGGTACCTGCAGAAAAAGCCCCGGCTAACTTCGTGCCAGCAGCCGCGGTAATACGAAGG

GGGCTAGCGTTGCTCGGAATTACTGGGCGTAAAGCGCACGTAGGCGGCTTCTTAAGTCGG  
TGGTGAAATCCTGGAGCTCAACTCCAGAACTGCCTTCGATACTGGGAAGCTCGAGTCCGG  
GAGAGGTGAGTGGAAGTGCAGGTGTAGAGGTGAAATTCGTAGATATTGCAAGAACACCA  
GTGGCGAAGGCGGCTCACTGGCCCGTACTGACGCTGAGGTGCGAAAGCGTGGGGAGCAA  
ACAGGATTAGATACCCCAGTAGTCC

>Otu60

CCAGCCTATGGGGGGCAGCAGTCGAGAATTTTTCTCAATGGGCGAAAGCCTGAAGGAGCG  
ACGCCGCGTGGGGGATGAATGGCTTCGGCCCGTAAACCCCTGTCATTTGCGAACAAATTG  
ACTCACCTAACACGTGTGTCAATTGATTGTAGCGGAAGAGGAAGGGACGGCTAACTCTGTG  
CCAGCAGCCGCGGTAATACAGAGGTCCCAAGCGTTGTTTCGGATTCACTGGGCGTAAAGGG  
TGCGTAGGCGGTTGGGTAAGTCTGACGTGAAATCTCCGGGCCTAACCCGGAAGTGCCTT  
GGATACTATCCGGCTAGAGGAATGGAGGGGAGACTGGAATACTTGGTGTAGCAGTGAAAT  
GCGTAGATATCAAGTGGAACACCAGTGGCGAAGGCGAGTCTCTGGACATTTCTTGACGCT  
GAGGCACGAAAGCCAGGGGAGCAAACGGGATTAGAAACCCTTGTAGTCC

>Otu61

CCAGCCTATGGGGGGCAGCAGTGGGGAATCTTGACAAATGGGGGAAACCCTGATGCAGCG  
ACGCCGCGTGAGCGATGAAGCCCTCGGGGTGTAAAGCTCTTTCGGCAGGGAAGATTATG  
ACGGTACCTGCAGAAGCAGCTGCGGCTAACTACGTGCCAGCAGCCGCGGTAATACGTAGG  
CAGCAAGCGTTGTTTCGGAGTTACTGGGCGTAAAGGGTGTGTAGGCGGTTGCCTAAGTTTG  
GTGTGAAATCTCCCGGCTTAACCGGGAGGGTGCGCCGAAACTGGGTGACTAGAGTATGG  
GATGGGTAAAGTGGAATTCCTGGTGTAGCGGTGAAATGCGTAGATATCAGGAGGAACACCG  
GTGGTGTAGACGGCTTACTGGACCATAACTGACGCTGAGACACGAAAGCGTGGGTAGCAA  
ACAGGATTAGATACCCTAGTAGTCC

>Otu62

CCAGCCTATGGGTGGCTGCAGTTGGGAATCTTGACAAATGGGGGAAACCCTGATCCAGCC  
ATGCCGCGTGAGTGATGAAGGCCTTCGGGTGTAAACTCTTTCGCGCACGACGATAATG  
ACGGTAGTGCGAGAAGAAGCTCCGGCTAACTTCGTGCCAGCAGCCGCGGTAATACGAAGG  
GGGCTAGCGTTGTTTCGAATTACTGGGCGTAAAGCGCGCGCAGGCGGCTATCCAAGTCAG  
TGGTGAAAGCCCGGAGCTCAACTCCGGAAGTGCATTGAAACTGTTTAGCTTGAGGACGA  
GAGAGGTGAGTGGAATTCACAGTGTAGAGGTGAAATTCGTAGATATTGGGAAGAACACCG  
GTGGCGAAGGCGGCTCACTGGCTCGTTTCTGACGCTCAGGCGCGACAGCGTGGGGATCAA  
ACAGGATTAGAAACCCTCGTAGTCC

>Otu63

CCAGCCTATGGGGGGCAGCAGTCGAGAATTTTTCTCAATGGGGGAAACCCTGAAGGAGCG  
ACGCCGCGTGAGGATGAAGGCTTTCGGGTGTAAACTCCTGTCATTTGGGAACAAGGCC  
TTACGTTAACTGCGTGGAGGTTTGATAGTACCGAAAGAGGAAGAGACGGCTAACTCTGTG  
CCAGCAGCCGCGGTAATACAGAGGTCTCAAGCGTTGTTTCGGATTTATTGGGCGTAAAGGG  
CGCGTAGGCGGCGGGGTAAGTCGGGTGTGAAATCTCAGGGCTCAACCCTGAAAATGCACT  
TGATACTGCTCTGCTTGAGGACTGGAGAGGAGACTGGAATTCACGGTGTAGCAGTGAAAT  
GCGTAGAGATCGTGAGGAAGACCAGTGGCGAAGGCGGGTCTCTGGACAGTTCCTGACGCT  
GAGGCGCGAAGGCCAGGGGAGCAAACGGGATTAGAAACCCCGTAGTCC

>Otu64

CCAGCCTATGGGGGGCAGCAGTGGGGAATCTTGACAAATGGGCGAAAGCCTGATGCAGCA  
ACGCCGCGTGAGGGACGAAGGCTTTCGAGTTGTAAACCTCTTTCAGCAGGGACGATTGT  
GACGGTACCTGCAGAAGAAGCCCCGCCAACTACGTGCCAGCAGCCGCGGTAATACGTAG  
GGGCAAGCGTTGTCCGATTTATTGGGCGTAAAGAGCTCGTAGGCGGCTTGGCAAGTCG  
GATGTGAAACCTCCAGGCTCAACCTGGAGTCGCCATTCGATACTGCCATGGCTAGAGTTT  
GGTAGGGGACCACGGAATTCCTGGTGTAGCGGTGAAATGCGCAGATATCAGGAGGAACAC  
CAGCGGCGAAGGCGGTGGTCTGGGCCAATACTGACGCTGAGGAGCGAAAGCGTGGGGAGC  
GAACAGGATTAGAAACCCCAGTAGTCC

>Otu65

CCAGCCTACGGGGGGCAGCAGTAAGGGATATTGCGCAATGGGCGAAAGCCTGACGCAGCA  
ACGCCGCGTGAGGATGACGGCCTTCGGGTGTAAACTCTTTCGGCAGGGACGAGGAAG  
GACGGTACCTCGCAACAAGTCACGGCTAACTACGTGCCAGCAGCCGCGGTAACACGTAG  
GTGGCGAGCGTTATCCGATTTACTGGGTGTAAAGCGTGTGCAGGCGGATGGGTAAAGTGG  
TGTATGAAATCGCCCGGCTCAACCGGGCGGGGTTATGCCAGACTGCCGGTCTAGAGGACG  
AGAGAGGGGCGTGGAATTCGGGTGTAGTGGTGAATGCGTAGAGATCCGGAGGAACCCC  
AGAGGCGAAGGCGGCGCCCTGGCTCGTACCTGACGCTCAGACACGACAGCATGGGGAGCG

AACGGGATTAGAAACCCAGTAGTCC

>Otu66

CCAGCCTATGGGGGGCAGCAGTCGAGAATCTTCCGCAATGGACGAAAGTCTGACGGAGCG  
ACGCCGCGTGATTGATGAAGTCCCTCTGGGACGTAAAGATCTTTTATGAGGGAAGAAGTT  
TATTGACTGTACCTCATGAATAAGAGGCTCCTAATCTCGTGCCAGCAGGAGCGGTAATAC  
GAGAGCCTCGAGCGTTATCCGGAATTATTGGGCGTAAAGGGTGCGTAGGTTGTTCTGTTA  
GTCTTTTGTAAACCCCTGGCTTAACCAGGGATCCGCGAAAGAAACGGCAGAACTTGAA  
AGTGTGAGAGGCGTACGGAACCTCATGGTGTAGGGGTGAAATCCGTTGATATCATGGGGAA  
CACCAAATGCGAAGGCAGTACGCTGGCGCATATTTGACACTGAAGCACGAAAGCGTGGGT  
AGCGAATGGGATTAGAGACCCCGTAGTCC

>Otu67

CCAGCCTACGGGGGGCAGCAGTGGGGAATCTTGACACAATGGACGAAAGTCTGATGCAGCA  
ACGCCGCGTGGGGGATGAAGCTTCTCGGAGTGTAACCCCTTTTCGACCCGGAAGAAAGCC  
CGCAAGGGTTTGACGGTACGGGTATAAGAAGCCCCGGCTAACTACGTGCCAGCAGCCGCG  
GTAAACCGTAGGGGGCCAGCGTTGCTCGGAATTACTGGGCGTAAAGGGTCCGTAGGCGGT  
GTGGCAAGTCGGTAGTGAAATCTCTGGGCTTAACTCAGAGGCTGCTGCCGAAACTGCTGT  
GCTAGAGTGCGAGAGAGGCGAGTGGAATTGCGGGTGAGCGGTGAAATGCGTAGATATCC  
GCAGGAACATCCGAGGCGAAAGCGGCTCGCTGGATCGCAACTGACGCTGAGGGACGAAAG  
CTAGGGGAGCAAACAGGATTAGATACCCTTG TAGTCC

>Otu68

CCAGCCTATGGGGGGCAGCAGTGGGGAATATTGGACAATGGGCGAAAGCCTGATCCAGCA  
ATGCCGCGTGAAATGATGAAGGCCCTAGGGTTGTAAAGTTCTTTCGGGTGGGACGATGATG  
ACGGTACCACCAGAAGAAGCCCCGGCTAACTTCGTGCCAGCAGCCGCGGTAATACGAAGG  
GGGCTAGCGTTGTTTCGGAATTACTGGGCGTAAAGCGCACGCAGGCGGCTCGTTAAATTAG  
AAGTGAAAGCCCTGGGCTCAACCCGGGAATTGCTTTTAAGACTGGCGAGCTTGAATCCGG  
AAGAGGGTAGTGGAATTCACAGTG TAGAGGTGAAATTCGTAGATATTGGGAAGAACACCA  
GTGGCGAAGGCGACTACCTGGTCCGGCATTGACGCTCATGTGCGAAAGCGTGGGGAGCAA  
ACAGGATTAGATACCCCGTAGTCC

>Otu69

CCAGCCTATGGGGGGCAGCAGTGGGGAATTTTGCGCAATGGGGGAAACCCTGACGCAGCA  
ACGCCGCGTGAGGATGAAGTACTTCGGTACGTAAACTCCTTTTCGATCGGGACGATAATG  
ACGGTACCGBAAGAAGAAGCCCCGGCTAACTTCGTGCCAGCAGCCGCGGTAATACGAGGG  
GGGCGAGCGTTGTTTCGGAATTATTGGGCGTAAAGGGTGCGTAGGCGGTTTGTTAAGTCTT  
TTGTGAAATCTACAGGCTCAACTTG TAGACTGCAAGGGAACTGCCGGGCTTGAGTGTGG  
GAGAGGTGAGTGGAATTCACGGTGTAGCGGTGAAATGCGTAGATATCGGGAGGAACACCT  
GTGGCGAAAGCGGCTCACTGGACCACAACCTGACGCTGATGCACGAAAGCTAGGGGAGCAA  
ACAGGATTAGATACCCCGTAGTCC

>Otu70

CCAGCCTACGGGGGGCAGCAGTGGGGAATTTTGACACAATGGGGGAAACCCTGATGCAGCA  
ACGCCGCGTGAGGATGAAGTCCCTTGGGATGTAAACTCCTTTTCGACCGGGACGATAATG  
ACGGTACCGBTGGAAGAAGCCCCGGCTAACTCTGTGCCAGCAGCCGCGGTAATACGAGGG  
GGGCAAGCGTTGTTTCGGAATTATTGGGCGTAAAGGGTGCGTAGGCGGTGCGGTAAGTCTT  
CTGTGAAATCTCCGGGCTCAACTCGGAGTCTGCAGGAGAACTGCCGTGCTTGAGTATGG  
GAGAGGTGAGTGGAATTCCTGGTGTAGCGGTGAAATGCGTAGATATCAGGAGGAACACCT  
GTGGCGAAAGCGGCTCACTGGACCATAACTGACGCTGATGCACGAAAGCTAGGGGAGCAA  
ACAGGATTAGAAACCCTAGTAGTCC

>Otu71

CCAGCCTATGGGTGGCAGCAGTCGAGAATATTGACACAATGGGCGAAAGCCTGATCGAGCG  
ACACCGCGTGAGGATGAAGGCCCTTCGGGTCGTAAACTGCGGTAGTAAGATAACAATGTA  
AATGAGTGTCTTACGGAAAGAGGTGGGTAACCTACGTGCCAGCACCAGCGGTAATACGTAG  
ACCTCAAGCGTTATCCGGATTTATTGGGCGTAAAGCGCGTGTAGGTGGCTTCGCGCGTCT  
TCTGTTAAAGCCCAGGGCCTAACCTGGAAGTG CAGGAGATACGGCGGAGCTCGAGGAGG  
TTAGAGGTGCATGGAACGCACGGTGTAGGGGTGAAATCCGTTGATATCGTGCGGAATACC  
AAAGGCGAAGGCATTGCACTGGGACCTTCTGACACTGAGACGCGAAAGCGTGGGGAGCA  
AAAAGGATTAGAAACCCTCGTAGTCC

>Otu72

CCAGCCTATGGGGGGCAGCAGTGAGGAATATTGGTCAATGGGCGCAAGCCTGAACCAGCC  
ATCCCGCGTG CAGGAAGAAGGCGCTATGCGTCGTAAACTGCTTTTCCAGGGGAAGAAAAC

CCGTTACGAGTAACGGCTTGCCGGTACCCTGGGAATAAGCATCGGCTAACTCCGTGCCAG  
CAGCCGCGGTAATACGGAGGATGCGAGCGTTATCCGGATTTATTGGGTTTAAAGGGTGCG  
TAGGCGGATTAATAAGTCAGTGGTGAAAACCTTCAGCTTAACTGGGAGACTTGCCATTGAT  
ACTGTTAGTCTTGAGTACGGTCAAGGTAGGCGGAATGTGTAATGTAGCGGTGAAATGCTT  
AGATATTACACAGAACACCGATTGCGAAGGCAGCTTACTGGGCCATTACTGACGCTGATG  
CACGAAAGCGTGGGGAGCGAACAGGATTAGATACCCTAGTAGTCC

>Otu74

CCAGCCTATGGGGGGCAGCAGTGGGGAATCTTGACACAATGGGCGAAAGCCTGATGCAGCG  
ACGCCGCGTGGGGGATGAAGCTTTTCGGAGTGTAACCCCTTTTCGACTGGGACGAAAACC  
CGCAAGGGATTGACGGTACCAGTATAAGAAGCCCCGGCTAACTACGTGCCAGCAGCCGCG  
GTAAGACGTAGGGGGCCAGCGTTGTTTCGGAATTACTGGGTGTAAAGGGTTCGTAGGCGGT  
GCGGCAAGTTGGGAGTGAAATCTCTGGGCTTAACCCAGAGGCTGCTTCCAAAACCTGCTGT  
GCTTGAGTGTGAGAGAGGCTCGTGGAATTGCAGGTGTAGCGGTGAAATGCGTAGATATCT  
GCAGGAACACCCGTGGCGAAAAGCGCGAGCTGGATCACTACTGACGCTGAGGAACGAAAG  
CTAGGGGAGCAAACAGGATTAGAAACCCCCGTAGTCC

>Otu75

CCAGCCTATGGGGGGCAGCAGTGGGGAATATTGGACAATGGGCGAAAGCCTGATCCAGCA  
ATGCCGCGTGTGTGAAGAAGGTCTTCGGATTGTAAAGCACTTTTCGACGGGGACGATGATG  
ACGGTACCCGTAGAAGAAGCCCCGGCTAACTTCGTGCCAGCAGCCGCGGTAATACGAAGG  
GGGCTAGCGTTGCTCGGAATGACTGGGCGTAAAGGGCGCGTAGGCGGATGGCACAGTCAG  
ATGTGAAATTCCTGGGCTTAACCTGGGGGCTGCATTTGATACGTGTTGTCTAGAGTGAGG  
AAGAGGGTCGTGGAATTCACAGTGTAGAGGTGAAATTCGTAGATATTGGGAAGAACACCG  
GTGGCGAAGGCGGCGACCTGGTCCTTGACTGACGCTGAGGCGCGAAAGCGTGGGGAGCAA  
ACAGGATTAGAAACCCCCGTAGTCC

>Otu76

CCAGCCTATGGGGGGCAGCAGTAGGGAATTTTGCGCAATGGACGAAAGTCTGACGCAGCA  
ACGCCGCGTGAGTGATGAAGGTCTTCGGATTGTAAAGCTCTGTTGAGTGGGAAGAAAAGT  
TCAGGGAATAATACCTCTGAACGTGACGGTACCATTTCGAGGAAGCCCCGGCTAACTACGT  
GCCAGCAGCCGCGGTAATACGTAGGGGGCAAGCGTTGTTTCGGAATCACTGGGCGTAAAGG  
GAGAGTAGGCGGGAAAATAAGTTAGAAGTTAATGTCCGGGCTTAACCCGGAATCTGCTT  
CTAATACTGTTTTTCTTGAGTATTGGAGAGGGAGATGGAATTCAGGTGTAGCGGTGGAA  
TGCGTAGATATCTGGAAGAACACCAGCTGCGAAGGCGGTCTCCTGGCCAAATACTGACGC  
TGATGCTCGAAAGCTAGGGGAGCAAACAGGATTAGAAACCCCAGTAGTCC

>Otu77

CCAGCCTACGGGTGGCTGCAGTAAGGAATATTGGACAATGGTGGCAACACTGATCCAGCC  
ATGCCGCGTGACAGGATGAAGGCGCTACGCGTTGTAAACTGCTTTTGTACGGGAGAAAACC  
TATCTACGTGTAGATAGCTGATAGTACCGTAAGAATAAGCATCGGCTAACTTCGTGCCAG  
CAGCCGCGGTAATACGAAGGATGCAAGCGTTATCCGGATTTATTGGGTTTAAAGGGTGCG  
TAGGCGGACTTATAAGTCAGTGGTGAAATCTCGATGCTTAACATCGAACGTGCCATTGAT  
ACTGTAGGTCTTGAGTACAGATGCCGTTGGCGGAATGTGTCATGTAGCGGTGAAATGCAT  
AGATATGACACAGAACACCGATTGCGAAGGCAGCTGACGAAACTGTAACGTACGCTGAGG  
CACGAAAGCGTGGGGATCAAACAGGATTAGAAACCCCTTGTAGTCC

>Otu78

CCAGCCTACGGGGGGCAGCAGTGGGGAATTTTGCGCAATGGGGGAAACCCTGACGCAGCA  
ACGCCGCGTGAGGATGAAGCCCTTGGGGTGTAACCTCCTTTTCGACTGGGAAGATTATG  
ACGGTACCAGTGGAAGAAGCACCGGCTAACTCTGTGCCAGCAGCCGCGGTAATACAGAGG  
GTGCGAGCGTTGTTTCGGAATTATTGGGCGTAAAGGGCGCGTAGGCGGTGCGGTAAGTCAC  
CTGTGAAATCCCCGGGCTTAACCTCGGGGCTGCAGGCGAAACTGCCGTGCTGGAGTATGG  
GAGAGGTGCGTGGAATTCCTGGTGTAGCGGTGAAATGCGTAGATATCGGGAGGAACACCT  
GTGGCGAAAGCGGCGCACTGGACCATTACTGACGCTGAGGCGCGAAAGCTAGGGGAGCAA  
ACAGGATTAGATACCCGCGTAGTCC

>Otu79

CCAGCCTACGGGGGGCAGCAGTGGGGAATATTGGACAATGGGCGCAAGCCTGATCCAGCA  
ATGCCGCGTGTGTGAAGAAGGCCTTCGGGTGTAAAGCACTTTTATCAGGAGCGAAATAC  
CATCGGCTAATACCCGGTGGGGCTGACGGTACCCTGAGGAATAAGCACCCGGCTAACTTCGT  
GCCAGCAGCCGCGGTAATACGAAGGGTGCAAGCGTTAATCGGAATTACTGGGCGTAAAGC  
GTGCGTAGGCGGTGAGTTAAGTCTGCTGTGAAATCCCCGGGCTCAACCTGGGAATGGCAG  
TGGATACTGGCTCGCTAGAGTGTGATAGAGGATGGTGGAATTCCTGGTGTAGCGGTGAAA

TGCGTAGAGATCGGGAGGAACATCAGTGGCGAAGGCGGCCATCTGGATCAACACTGACGC  
TGAGGCACGAAAGCGTGGGGAGCAAACAGGATTAGAAAACCCAGTAGTCC

>Otu80

CCAGCCTATGGGTGGCAGCAGTGGGGAATATTGGACAATGGGCGCAAGCCTGATCCAGCA  
ATGCCGCGTGAGTGAAGAAGGTCTTCGGATTGTAAAGCTCTTTCGACGGGGACGATGATG  
ACGGTACCCGTAGAAAGAAGCCCCGGCTAACTTCGTGCCAGCAGCCGCGGTAATACGAAGG  
GGGCTAGCGTTGCTCGGAATGACTGGGCGTAAAGGGCGCGTAGGCGGTTTCGTACAGTCAG  
ACGTGAAATTCCCGGGCTCAACCTGGGGGCTGCGTTTGATACGTGCGGGCTTGAGTTCGG  
AAGAGGGTCGTGGAATTCCCACTGTAGAGGTGAAATTCGTAGATATTGGGAAGAACACCG  
GTGGCGAAGGCGGCGACCTGGTCCGATACTGACGCTGAGGCGCGAAAGCGTGGGGAGCAA  
ACAGGATTAGATACCCAGTAGTCC

>Otu81

CCAGCCTATGGGGGGCAGCAGTAAGGAATATTGGTCAATGGGCGGAAGCCTGAACCAGCC  
ATGCCGCGTGCGAGGAAGACGGCCCTACGGGTTGTAACTGCTTTTATACCGGAATAAACC  
CTTTTACGTGTAAGAGGCTGAATGTACGGTAAGAATAAGGATCGGCTAACTCCGTGCCAG  
CAGCCGCGGTAATACGGAGGATCCAAGCGTTATCCGGATTTATTGGGTTTAAAGGGTGCG  
TAGGCGGCTTTTAAAGTCAGGGGTGAAAGACGGTAGCTTAACTATCGCAGTGCCCTTGAT  
ACTGAAGAGCTTGAATATACTAGAGGTAGGCGGAATGTGACAAGTAGCGGTGAAATGCAT  
AGATATGTCACAGAACACCAATTGCGAAGGCAGCTTACTATGGTATGATTGACGCTGAGG  
CACGAAAGCGTGGGGATCAAACAGGATTAGATAACCCCGTAGTCC

>Otu82

CCAGCCTACGGGTGGCAGCAGTAAGGAATATTGGTCAATGGGCGGAAGCCTGAACCAGCC  
ATGCCGCGTGCGAGGAAGACGGCCCTACGGGTTGTAACTGCTTTTGCAGGGGAATAAACC  
CCGTTACGTGTAACGGGTTGAATGTACTCTGAGAATAAGGATCGGCTAACTCCGTGCCAG  
CAGCCGCGGTAATACGGAGGATCCGAGCGTTATCCGGATTTATTGGGTTTAAAGGGTGCG  
TAGGCGGCTTATTAAGTCAGGGGTGAAAGACGGTAGCTTAACTATCGCAGTGCCCTTGAT  
ACTGATGAGCTTGAATGTAGTTGAGGTAGGCGGAATGTGACAAGTAGCGGTGAAATGCAT  
AGATATGTCACAGAACACCAATTGCGAAGGCAGCTTACTAAAGTATGATTGACGCTGAGG  
CACGAAAGCGTGGGGATCAAACAGGATTAGAAAACCCAGTAGTCC

>Otu83

CCAGCCTATGGGGGGCTGCAGTGGGGAATTTTGCGCAATGGGGGAAACCCTGACGCAGCA  
ACGCCGCGTGAGGATGAAGGCCCTTGGGTCGTAACTCCTTTTCGACCGGGACGATTATG  
ACGGTACCCGTGGAAGAAGCACCGGCTAACTCTGTGCCAGCAGCCGCGGTAATACAGAGG  
GTGCGAGCGTTGTTTCGAATTATTGGGCGTAAAGGGCGCGTAGGCTGTGCGGTAAGTCAC  
CTGTGAAACCTCCAGGCTTAACTTGGAGCCTGCAGGCGAAACTGCCGTGCTGGAGGGTGG  
GAGAGGTGCGTGGAATTCCCGGTGTAGCGGTGAAATGCGTAGATATCGGGAGGAACACCT  
GTGGCGAAAGCGGCGCACTGGACCACTTCTGACGCTGATGCGCGAAAGCTAGGGGAGCAA  
ACAGGATTAGAAAACCCAGTAGTCC

>Otu84

CCAGCCTATGGGAGGCAGCAGTGGGGAATCTTGCGCAATGGGCGAAAGCCTGACGCAGCG  
ACGCCGCGTGGGGGATGAAGCTTCTCGGAGTGTAACCCCTTTTCGACTGGGACGAATGCC  
TCGCAAGAGGAGTGACGGTACCAGTAGAAGAAGCCCCGGCTAACTACGTGCCAGCAGCCG  
CGGTAAGACGTAGGGGGCCAGCGTTGTTTCGAATTACTGGGTGTAAAGGGTTTCGTAGGCG  
GTGCGGCAAGTTGGGAGTGAAATCTCTGGGCTTAACCCAGAGGCTGCTTCCAAAACCTGCC  
GTGCTTGAGTGTTGGGAGAGGCGCGTGGAATTGCAGGTGTAGCGGTGAAATGCGTAGATAT  
CTGCAGGAACACCCGTGGCGAAAGCGGCGCGCTGGACCACAACCTGACGCTGAGGAACGAA  
AGCTAGGGGAGCAAACAGGATTAGAAAACCCCGTAGTCC

>Otu85

CCAGCCTATGGGGCGCTGCAGTGGGGAATATTGGACAATGGGCGCAAGCCTGATCCAGCC  
ATGCCGCGTGGGTGATGAAGGCCCTAGGGTTGTAAAGCCCTTTTCGGCGGGGAAGATAATG  
ACGGTACCCGCAGAAGAAGCCCCGGCTAACTTCGTGCCAGCAGCCGCGGTAATACGAAGG  
GGGCTAGCGTTGCTCGGAATCACTGGGCGTAAAGCGCACGTAGGCGGCTTTTAAAGTCAG  
GGGTGAAATCCTGGAGCTCAACTCCAGAACTGCCTTTGATACTGAGGAGCTTGAGTCCGG  
GAGAGGTGAGTGGAAGTGCAGGTGTAGAGGTGAAATTCGTAGATATTTCGCAAGAACACCA  
GTGGCGAAGGCGGCTCACTGGCCCGGTACTGACGCTGAGGTGCGAAAGCGTGGGGAGCAA  
ACAGGATTAGATACCCGCGTAGTCC

>Otu86

CCAGCCTATGGGTTGCAGCAGGCGGGTAACTTTTGCAATGCGCGCAAGCGTGACAAAGCA

AGCCAGAGTGATTTTCTATAATTGAAAATCTTTTGCAGAGATGCAAAAAGTCTCGTGAATA  
AGGACTGGGCAAGACTGGTGCCAGCCGCCGGTAATCCCAGCAGTCCGAGTCGCAGCCA  
CATTTGTTGGGTCTAAAACATCCGTAGCTCGCCATCTAAGTCTCTTGTCAAATCGGGCCT  
CTTAAGGGTCCGGCGAGCAAGAGATACTGTTTGGCTAGAGACCGGGAGACGTAAGGAGTA  
CTATGGGAGTAGCGGTAAAATGCGTTGATCCTCATAGGACTAACAATAGCGAAGGCACCT  
TACGATAACGGTTCTGACAGTGAGGGATGAAGGCTAGGGGCGCAAAGTGGATTAGAAACC  
CGCGTAGTCC

>Otu87

CCAGCCTACGGGTTGCTCCAGTGGGGAATCTTGCGCAATGGGCGAAAGCCTGACGCAGCA  
ACGCCGCGTGGGGGATGAAGCTTTTCGGAGTGTAACCCCTTTTCGACCCGGAAGAAGGCC  
CGCAAGGGTCCGACGGTACGGGTATAAGAAGCCCCGGCTAACTACGTGCCAGCAGCCGCG  
GTAAAACGTAGGGGGCCAGCGTTGCTCGGAATTACTGGGCGTAAAGGGTCTGTAGGCGGT  
GTGGCAAGTTGGAAGTGAAATTTACGGGCTTAACCCTGAAACTGCTTCCAAAACCTGCCGT  
GCTCGAGTGCGAGAGAGGCGAGTGGAATTGCAGGTGTAGCGGTGAAATGCGTAGATATCT  
GCAGGAACATCCGAGGCGAAAGCGGCTCGCTGGATCGCAACTGACGCTGAGAGACGAAAG  
CTAGGGGAGCAAACAGGATTAGATACCCCTGTAGTCC

>Otu88

CCAGCCTATGGGTTGCTGTCAGTAAGGGATATTGCGCAATGGGCGAAAGCCTGACGCAGCA  
ACGCCGCGTGCCTCGAGGAAGGCCTTCGGGTCTGTAAAGGGCTTTTAGGGCTGAAGAGCAAG  
GACGGTAAGCCCGGAAGAAGTGTCGGCTAACTACGTGCCAGCAGCCGCGGTAAAACGTAG  
GACGCAAGCGTTATCCGGAGTTACTGGGCGTAAAGGGCAGGCAGGCGGGCGGACAAGTCG  
GGTGTGAAATCTCTCTGGCTTAACCGGGAGGGTGCATTGAAACTGTTCGGCCTGGAGGGC  
AGCAGAGGAGCGTGGAATTCCGGGTGGAGTGGTGAAATGCGTAGAGATCCGGAGGAACAC  
CAGAGGCGAAAGCGGCGCTCTGGGCTGCACCTGACGCTGAACTGCGAAAGCCAGGGGAGC  
GAACGGGATTAGAAACCCCTGTAGTCC

>Otu89

CCAGCCTACGGGGGGCTGCAGTGGGGAATATTGGACAATGGGGGAAACCCTGATCCAGCG  
ACGCCGCGTGTGTGAAGAAGGCCTGCGGGTTGTAAAGCACTTTTAGTGGGGACGAAAAGC  
CTAGGGCTAATACCCTTGGGTCTTGACTTAACCCAAAGAAAAAGCACCGGCTAACTCTGT  
GCCAGCAGCCGCGGTAATACAGAGGGTGCAAGCGTTAATCGGAATTACTGGGCGTAAAGC  
GTGCGTAGACGGTTTTTTAAGTCGGATGTGAAATCCCCGGGCTCAACCTGGGAATTGCAT  
TCGAGACTGGAAGGCTAGGGTGCGGAAGAGGGAAGCGGAATTTCTGGTGTAGCGGTGAAA  
TGCGTAGATATCAGAAGGAACATCAGTGGCGAAAGCGGCTTCCTGGTCCAGCACCGACGT  
TCAGGCACGAAAGCGTGGGGAGCAAACAGGATTAGATACCCCCGTAGTCC

>Otu90

CCAGCCTACGGGTGGCAGCAGTGAGGAATATTGGTCAATGGGCGGAAGCCTGAACCAGCC  
ATCCCGCGTGCAGGAAGACGGCGCTATGCGTTGTAAACTGCTTTTCCAGGGGAAGAAAAC  
CAGCTACGGGTAGCGGCTTGCCGGTACCCTGGGAATAAGCATCGGCTAACTCCGTGCCAG  
CAGCCGCGGTAATACGGAGGATGCGAGCGTTATCCGGATTTATTGGGTTTAAAGGGTGCG  
TAGGCGGACAAAATAAGTCAGTGGTGAAAACCTGCAGCTTAAGTGTAGACTTGCCATTGAT  
ACTGTTAGTCTTGAGGGTGGTCAAGGTAGGCGGAATGTGTAATGTAGCGGTGAAATGCTT  
AGATATTACACAGAACACCGATTGCGAAGGCAGCTTACTGGGCCATTACTGACGCTGATG  
CACGAAAGCGTGGGGAGCGAACAGGATTAGAAACCCGAGTAGTCC

>Otu91

CCAGCCTACGGGTGGCAGCAGTAGGGAATATTGGACAATGGGTGAGAGCCTGATCCAGCC  
ATGCCGCGTGCAGGAAGAAGGCCTTCTGGGTTGTAAACTGCTTTTCCAGGGGATAAAAAG  
ACCCTTGCGAGGGAAATTGAAGGTACCTGGTGAATAAGCCACGGCTAACTACGTGCCAGC  
AGCCGCGGTAATACGTAGGTGGCAAGCGTTGTCCGATTTATTGGGTTTAAAGGGTGCGT  
AGGCGGTTCTTTAAGTCAGTGGTGAAATACTTCGGCTCAACCGGAGATGTGCCAATGATA  
CTGGGGAACCTTGAGTACAGACGAGGTAGGCGGAATTGACGGTGTAGCGGTGAAATGCATA  
GATATCGTCAAGAACACCGATAGCGAAGGCAGCTTACTAGACTGTAACTGACGCTGATGC  
ACGAAAGTGTGGGGATCAAACAGGATTAGATACCCGAGTAGTCC

>Otu92

CCAGCCTATGGGAGGCAGCAGTAGGGAATATTGCGCAATGGACGAAAGTCTGACGCAGCA  
ACGCCGCGTGTGGGATGAAGCTCCTTGGAGCGTAAACCACTGTGCGGGGGGACGAACGAT  
TATGACTCTAACATAGTCATAGTTTGAAGTGTACCCCTAAAGGAAGCTCCGGCTAACTCCG  
TGCCAGCAGCCGCGGTAATACGGGGGGAGCAAGCGTTGTTCGGAATCACTGGGCGTAAAG  
GGTGCAGAGGCGGGAGATTAAAGTCGGATGTGAAAACCTCGGGCTCAACCCGAGGCCTGCA

TTTGAAACTGATCTTCTTGAGTATCGGAGAGGAAAGCGGAACTCCAGGTGTAGCGGTGAA  
ATGCGTAGATATCTGGAGGAACACCTGTGGCGAAGGCGGCTTTCTGGCCGAATACTGACG  
CTCATGCACGAAGGCTAGGGGAGCAAACAGGATTAGATACCCTCGTAGTCC

>Otu93

CCAGCCTATGGGTTGCAGCAGTGGGGAATATTGGACAATGGGCGAAAGCCTGATCCAGCC  
ATGCCGCGTGTGTGAAGAAGGTCTTCGGATTGTAAAGCACTTTAAGTTGGGAGGAAGGGC  
ATGCACCTAATACGTGTGTGTCTTGACGTTACCGACAGAATAAGCACCGGCTAACTCTGT  
GCCAGCAGCCGCGGTAATACAGAGGGTGCAAGCGTTAATCGGAATTACTGGGCGTAAAGC  
GCGCGTAGGTGGTTCGTTAAGTTGAATGTGAAATCCCCGGGCTCAACCTGGGAACTGCAT  
CCAAAACCTGGCGAGCTAGAGTATGGTAGAGGGTGGTGGAATTTCTGTGTAGCGGTGAAA  
TGCGTAGATATAGGAAGGAACACCAGTGGCGAAGGCGACCACCTGGACTGATACTGACAC  
TGAGGTGCGAAAGCGTGGGGAGCAAACAGGATTAGATACCCAGTAGTCC

>Otu94

CCAGCCTATGGGGGGCTGCAGTGGGGAATCTTGACAATGGGGGAAACCCTGATGCAGCG  
ACGCCGCGTGAGCGATGAAGCCCTTCGGGGTGTAAGCTCTTTTCGGCAGGGAAGATTATG  
ACGGTACCTGCAGAAGCAGCTGCGGCTAACTACGTGCCAGCAGCCGCGGTAATACGTAGG  
CAGCAAGCGTTGTTTCGGAGTTACTGGGCGTAAAGGGTGCGTAGGCGGCTTTTTAAGTTTG  
GTGTGAAATCTCCCGGCTCAACTGGGAGGGTGCGCCGAATACTGAGAGGCTAGAGTGCGG  
GAGAGGAAAGTGGAATTCCTGGTGTAGCGGTGAAATGCGTAGATATCAGGAGGAACACCG  
GTGGTGTAAACGGCTTTCTGGACCGTAACCTGACGCTGAGGCACGAAAGCGTGGGTAGCAA  
ACAGGATTAGAAACCCCCGTAGTCC

>Otu95

CCAGCCTACGGGGGGCAGCAGGCGCGAAAACTTTACAATGCGGGAAACCGTGATAAGGGG  
ACACCGAGTGCCAGCATCCTATGCTGGCTGTCCGGGTGTGTAAAATACACCTGTTAGCAA  
GGGCCGGGCAAGACCGGTGCCAGCCGCCGCGGTAACACCGGCGGCCCGAGTGGTGATCGT  
GATTATTGGGTCTAAAGGGTCCGTAGCCGGTTTGGTCAGTCCTCCGGGAAATCTGACAGC  
TTAACTGTTAGGCTATCGGAGGATACTGCCAGACTTGGAACCGGGAGAGGTAAGAGGTAC  
TACAGGGGTAGGAGTGAAATCTTGTAATCCCTGTGGGACCACCTGTGGCGAAGGCGTCTT  
ACCAGAACGGGTTTCGACGGTGAGGGACGAAAGCTGGGGGCACGAACCGGATTAGAAACCC  
CCGTAGTCC

>Otu96

CCAGCCTATGGGGTGCAGCAGTGGGGAATCTTGCGCAATGGACGAAAGTCTGACGCAGCA  
ACGCCGCGTGAGGGACGAAGGCTTTCTGAGTTGTAAACCTCTTTTCGACAGGAACGATTGT  
GACGGTACCTGTAGAAGAAGCACCGGCCAACTATGTGCCAGCAGCCGCGGTGATACATAG  
GGTGCAAGCGTTATTCGATTATTGCGGCGTAAAGAGCTCGTAGGCGGTTCAATAAGTGA  
CGTGTTAATCCCCCAGGCTCAACCTGGGGCCGCCACGTCAAACCTGTTGTGACTAGAGTTT  
GGTAGGGGATCACGGAATTCCTGGTGTAGCGGTGGAATGCGCAGATATCAGGAGGAACAC  
CAGTAGCGAAGGCGGTGATCTGGGCCAATACTGACGCTGAGGAGCGAAAGCGTGGGGAGC  
GAACAGGATTAGAAACCCTAGTAGTCC

>Otu97

CCAGCCTACGGGTTGCTCCAGGCGCGAAAACTTCGCAATGTGGGTAAACCACGACGAGGGA  
ATTCCAAGTACTAGTACTTTGTATTAGTGGTTTTCTGTCCAAAGAACAGGGAGGGTAAG  
GGCTGGGTAAGACTGGTGCCAGCCGCCGCGGTAATACCAGCAGCCCAAGTGGTGATCATT  
ATTATTGGGTCTAAAACGTCCGTAGTCGGCTTAGTAAATTCCTGGGTAAATTGTGAAGCT  
CAACTTCACGAATTCGAGGAGACTGCTAGGCTTGGGACCGGGGGAGGTTGGAGGTACTT  
CGGGGGTAGGGGTGAAATCCTGTAATCCTCGAGGGACCACAGTGGCGAAGGCGTCTGAC  
CAAAACGGGTCCGACGACAAGGGACGAAGCCTAGGGGCGCAAACGGGATTAGATACCCTA  
GTAGTCC

>Otu99

CCAGCCTATGGGGCGCTGCAGTGGGGAATATTGGACAATGGGCGCAAGCCTGATCCAGCC  
ATGCCGCGTGTGTGAAGAAGGCCTTCGGGTGTAAAGCACTTTAAGCGGGGAGGAAGGGC  
TTATGGCTAATAACCGTGAGCATTGACGTTACCCGCAGAATAAGCACCGGCTAACTCTGT  
GCCAGCAGCCGCGGTAATACAGAGGGTGCAAGCGTTAATCGGAATTACTGGGCGTAAAGC  
GCGCGTAGGCGGTTGTGCAAGTTGGAGGTGAAATCCCCGGGCTTAACCTGGGCACTGCCT  
TCAAACTGCACGGCTAGAGTATGGGAGAGGAAGGTAGAATTCAGGTGTAGCGGTGAAA  
TGCGTAGAGATCTGGAGGAATACCGATGGCGAAGGCAGCCTTCTGGCCTAATACTGACGC  
TGAGGTGCGAAAGCATGGGGAGCAAACAGGATTAGAAACCCCCGTAGTCC

>Otu100

CCAGCCTACGGGTGGCAGCAGTCGCGAAAACTTCACAATGGGAGAAAATCCCGATGAGGGA  
ATTCCAAGTGCTAGCACTATGTGTTAGCTGTTCTTTTGTCTAAAAAACAGAAGAAGTAAG  
GGCCGGGTAAAGACGGGTGCCAGCCGCCGCGTAATACCCGCGGCCCGAGTGGTGGTTCGAT  
ATTATTGAGCCTAAAACGTCCGTAGCCGGTCTTGTAATCCTTGGGTAAATCGGCCAGCT  
TAACTGTCCGAAGTCCGGGGAGACTGCAAGACTTGGGATCGGGAGAGGTCAGAGGTAAT  
CTGGGGTAGGGGTAAAATCCTGTAATCCTGGAAGGACCACCGGTGGCGAAGGCGTCTGAC  
TAGAACGAATTCGACGGTGAGGGACGAAGCCCTGGGGCGCAAACGGGATTAGATACCCCT  
GTAGTCC

>Otu101

CCAGCCTATGGGTGGCACCAGTCGAGAATATTCGACAATGGACGAAAGTCTGATCGAGCG  
ACACCGCGTGAGGATGAAGGCCCTCGGGTCGTAAACTACGGTAGTATGATAAGAATGCA  
AATGACTGTCATACGGAAGAGGTGGGTAACCTACGTGCCAGCACCAGCGTAATACGTAG  
ACCTCAAGCGTTATCCGGATTTATTGGGCGTAAAGAGCATGTAGGAGGTTTCGCGCGTCT  
TTTGTAAAGCCAGGGCCTAACCCCTGGAAGTGCAGGAGATACGGCGGAACTAGAGGAGG  
TTAGAGGTGCATGGAACCTACGGTGTAGGGGTGAAATCCGTTGATATCGTGGGGAACACC  
AAAGGCGAAGGCAGTGCCTGGGACCTTCCTGACTCTGAGATGCGAAAGCGTGGGGAGCA  
AAAAGGATTAGAAACCCGAGTAGTCC

>Otu102

CCAGCCTACGGGGGGCTGCAGTGAGGAATATTCGCGCAATGGGGGCAACCCTGACGCAGCA  
ACGCCGCGTGAGTGAGGAAGGTTTTTCGGATTGTAAAGCTCTGTGAGCGGAAAGAAATGC  
ATGGTGGCTAATATCCATCATGCTTGACGGTACCGCTAAAGGAAGCACCAGGCTAACTCCG  
TGCCAGCAGCCGCGGTAATACGGGGGGTGAAGCGTTGTTTCGGAATTATTGGGCGTAAAG  
AGCGTGTAGGCGGCTGGACAAGTCAGATGTGAAAGCCCTGGGCTTAACCTAGGAAGTGCA  
TTTGAAGCTGTCCGGCTTGAGTAAGGGAGAGGAAAGTGGAATTCCTGGTGTAGAGGTGAA  
ATTCGTAGATATCAGGAGGAACACCGGTGGCGAAGGCGACTTTCTGGCCCTATACTGACG  
CTGAGACGCGAAAGCGTGGGTAGCAAACAGGATTAGATACCCCGTAGTCC

>Otu103

CCAGCCTATGGGTGGCAGCAGTAAGGAATATTTGGTCAATGGACGAAAGTCTGAACCAGCC  
ATGCCGCGTGAGGATGAAGGCCCTCTGGGTGTAAACTTCTTTTATTTGGGAAGAAACC  
CATTTTTTCTAAGATGGTTGACGGTACCAGATGAATAAGCACCAGGCTAACTCCGTGCCAG  
CAGCCGCGGTAATACGGAGGGTGAAGCGTTATCCGGATTCAGTGGGTTTAAAGGGTGCG  
TAGGCGGGCAGGTAAGTCAGTGGTGAATCTCCGGGCTTAACCCGGAAGCTGCCGTTGAT  
ACTATCTGTCTTGAATGTCTGAGGTTAGCGGAATATGTCATGTAGCGGTGAAATGCTT  
AGATATGACATAGAACACCAATTGCGAAGGCAGCTAACTACACGGTTATTGACGCTGAGG  
CACGAAAGCGTGGGGATCAAACAGGATTAGAAACCCCTCGTAGTCC

>Otu104

CCAGCCTATGGGTGGCTGCAGTCGAGAATTTTTCTCAATGGGGGAAACCCTGAAGGAGCG  
ACGCCGCGTGAGGATGAAGGTCTTCGGATTGTAAACTCCTGTCATGAGGGAACAAACCT  
GCATGTTTAACTGATGTGCAGCTGATAGTACCTCAAGAGGAAGAGACGGCTAACTCTGTG  
CCAGCAGCCGCGGTAATACAGAGGTCTCAAGCGTTGTTTCGGATTCAATTGGGCGTAAAGGG  
TGCGTAGGCGGCGAAGCAAGTCAGGTGTGAAATCCCGGGGCTCAACCCCGGAAGTGCCT  
TGATACTGCTTTGCTTGAGGACTGGAGAGGAGATCGGAATTCACGGTGTAGCAGTGAAAT  
GCGTAGATATCGTGAGGAAGGCCAGTGGCGAAGGCGGATCTCTGGACAGTTCCTGACGCT  
GAGGCACGAAGGCCAGGGGAGCAAACGGGATTAGAAACCCCTTGTAGTCC

>Otu105

CCAGCCTATGGGGCGCAGCAGTCGAGGATCTTCGGCAATGGGCGCAAGCCTGACCGAGCG  
ACGCCGCGTGTCGATGAAGGCCCTTCGGGTGTAAAGCACTGTCGAGGGGGAGGAAAGCC  
CGCAAGGGCCTGACCTATCCCTGGAGGAAGCAGGGCTAAGTTCGTGCCAGCAGCCGCGG  
TAAGACGAACCGTGCAACGTTGTTTCGGAATCACTGGGCTTAAAGGGCGCGTAGGCGGGT  
GGTCAAGTCAGGGGTGAAATCCTCCAGCTCAACTGGAGAACAGCTTTTGATACTGGCCAT  
CTTGAGGGAGGTAGGGGCATGTGGAACCTCCGGTGGAGCGGTGAAATGCGTAGATATCGG  
AAGGAACGCCGTGGCGAAAGCGACGTGCTGGACCTTTTCTGACGCTGAGGCGCGAAAGC  
CAGGGGAGCAAACGGGATTAGAAACCCCGTAGTCC

>Otu106

CCAGCCTATGGGGGGCAGCAGTGGGGAATATTTGGACAATGGGCGCAAGCCTGATCCAGCC  
ATGCCGCGTGAGTGATGACGGCCTTAGGGTTGTAAAGCTCTTTCGCACGCGACGATAATG  
ACGGTAGCGTGAGAAGAAGCCCCGGCTAACTTCGTGCCAGCAGCCGCGGTAATACGAAGG  
GGGCTAGCGTTGTTTCGGAATTACTGGGCGTAAAGCGCGTGTAGGCGGGCTTTTAAGTCAG



GGGTGAAATGCCGAGGCTCAACCTCGGAACTGCCTTTGATACTGGAAGTCTTGAGTCCGG  
GAGAGGTGAGTGGAAGTGCAGGTGTAGAGGTGAAATTCGTAGATATTCGCAAGAACACCA  
GTGGCGAAGGCGGCTCACTGGCCCGGAACTGACGCTGAGACGCGAAAGCGTGGGGAGCAA  
ACAGGATTAGATACCCCAGTAGTCC

>Otu107

CCAGCCTACGGGGGGGCTGCAGTCGAGAATTTTTTACAATGGGCGCAAGCCTGATGGAGCG  
ACGCCGCGTGGGGGATGAATGGCTTCGGCCCGTAAACCCCTGTCATTTGCGATCAACCGT  
TGTTGTTTTAAGAGATGACAACCTGATAGTAGCGAAAGAGGAAGGGACGGCTAACTCTGTG  
CCAGCAGCCGCGGTAATACAGAGGTCCCAAGCGTTGTTTCGGATTCACTGGGCGTAAAGGG  
TGCGTAGGTGGCGGGGTAAGTCGGATGTGAAATCTCCGAGCTCAACTCGGAAATGGCATT  
GGAAACTGCTCTGCTCGAGGGTTGGAGGGGGGACTGGAATACTTGGTGTAGCAGTGAAAT  
GCGTAGATATCAAGTGGAACACCAGTGGCGAAGGCGAGTCCCTGGACAACTCCTGACACT  
GAGGCACGAAAGCTAGGGGAGCAAACAGGATTAGAGACCCTCGTAGTCC

>Otu108

CCAGCCTATGGGGGGGAGCAGTGGGGAATATTGGACAATGGGGGAAACCCCTGATCCAGCA  
ATGCCGCGTGTGTGAAGAAGGTCTTCGGATTGTAAAGCACTTTTGGCAGGGACGATGATG  
ACGGTACCTGCAGAATAAGCCCCGGCTAACTTCGTGCCAGCAGCCGCGGTAATACGAAGG  
GGGCTAGCGTTGCTCGGAATGACTGGGCGTAAAGGGCGCGTAGGCGGCACATACAGTCAG  
AAGTGAAATTCCTGGGCTCAACCTGGGGACTGCTTTTGATACGTGTGAGCTAGAGTGGAG  
AAGAGGGTTGTGGAATTTCCAGTGTAGAGGTGAAATTCGTAGATATTGAAAGAACACCG  
GTGGCGAAGGCGGCAACCTGGTCTTCTACTGACGCTGAGGCGCGAAAGCGTGGGGAGCAA  
ACAGGATTAGAAACCCCCGTAGTCC

>Otu109

CCAGCCTACGGGGGGCAGCAGTGGGGAATCTTGACAATGGGGGAAACCCCTGATGCAGCG  
ACGCCGCGTGAGCGATGAAGCCCTTCGGGGTGTAAGCTCTTTCGGCAGGGAAGATTATG  
ACGGTACCTGCAGAAGCAGCTGCGGCTAACTACGTGCCAGCAGCCGCGGTAATACGTAGG  
CAGCGAGCGTTGTTTCGGAGTTACTGGGCGTAAAGGGTGTGTAGGCGGTTGTTTAAGTTTG  
GTGTGAAATCTCCCGGCTTAACCGGGAGGGTGCGCCGAATACTGAGCGACTAGAGTATGG  
GAGAGGAAAGTGGAATTCCTGGTGTAGCGGTGAAATGCGTAGATATCAGGAGGAACACCG  
GCGGTGTAGACGGCTTTCTGGACCATAACTGACGCTGAAACACGAAAGCGTGGGTAGCAA  
ACAGGATTAGATACCCTAGTAGTCC

>Otu110

CCAGCCTATGGGACGCTGCAGGCGCGAAACCTTTACAATGCACGTAAGTGTGACGAGGGA  
ATTCTCAGTGCTTAGGTTATACCTAGGCTTTTGCCAAGACCAAGACTCTTGCGCAATAAG  
TGGTGGGCAAGACCGGTGCCAGCCGCCGCGGTAACCCCGGCGCCACGAGTGGGAATCGCT  
TTTATTGGGTCTAAAGCATCCGTAGCCGGTTTGTTAAATGTTCTGTGAAATCGTGAAGCT  
CAACTTCACGGTGTGCAGAGCACACTGACAACTTGGGACCAGGAAAGGTGTTTCGGTATT  
CCAGGGGGAGCGGTAAAATGTGATAATCCTTGGAGGACCACCAATGGCGAAGGCAGAACG  
CTAGAATGGATCCGACGGTGAGGGATGAAAGCTAGGGGAGCGATCCGGATTAGAAACCC  
TG TAGTCC

>Otu111

CCAGCCTACGGGGGGGAGCAGTGGGGAATCTTGACAATGGAGGAAACTCTGATGCAGCG  
ACGCCGCGTGAGCGATGAAGCCCTTCGGGGTGTAAGCTCTTTCGACGGGAACGATAATG  
ACGGTACCCGAAGAAGAAGCTGCGGCTAACTACGTGCCAGCAGCCGCGGTAATACGTAGG  
CAGCAAGCGTTGTTTCGAATTACTGGGCGTAAAGAGTGTGTAGGCGGTGTTCTAAGTCTG  
TTGTGAAATCTCCCGGCTTAACCTGGGAGGGTGCGGCGGAGACTGGAATGCTAGAGTATGG  
GAGAGGTAAGCGGAATTCCTGGTGTAGCGGTGAAATGCGTAGATATCAGGAGGAACACCT  
GTGGTGTAGACAGCTTACTGGACCATGACTGACGCTGAGACACGAAAGCGTGGGTAGCAA  
ACAGGATTAGATACCCTCGTAGTCC

>Otu112

CCAGCCTATGGGGCGCAGCAGGCGCGAAAACTTTACACTACACGAAAGTGTGATAAGGGG  
ATTCCAAGTGGTTATACACATGTATAATCTTTTTTTGAGAGCAAAGATCTCGAAGAATAA  
GTGGTGGGTAAGACCGGTGCCAGCAGCCGCGGTAATCCCGGCGCCACAAGTAGGGACCAG  
GGTTATTGGGCCATAAGCGTTCGTAGCAGGTCGGGTAAATCTCTTGTGAAATCGTTGGGC  
TTAACCTAACGGCGTGCAGGAGAGACTGCTCGACTTGAGACCGGGAGGGGTTGAGAGTAT  
TCCTTGGGGAGCGGTAAAATGCTATAATCCTTGGAAAGACTACCTGTGGCGAAGGCGCTCA  
ACCAGAACGGGTCTGACTGTGAGGGACGAAAGCCAGGGGAGCAATCCGGATTAGATACCC  
TAGTAGTCC

>Otu113

CCAGCCTACGGGGTGCTGCAGTGGGGAATCTTGCAACAATGGGCGAAAGCCTGATGCAGCG  
ACGCCGCGTGGGGGATGAAGCATTTCGGTGTGTAAACCCCTTTTCGACCGGGAAGAATACC  
TAGCAATAGGGGTGACGGTACCGGTAGAAGAAGCCCCGGCTAACTACGTGCCAGCAGCCG  
CGTAAGACGTAGGGGGCCAGCGTTGTTTCGGAATTACTGGGTGTAAAGGGTTCGTAGGCG  
GTGTGGCAAGTTGGGAGTGAAATCTCTGGGCTTAACCCAGAGGCTGCTTCCAAAACCTGCT  
GTGCTTGAGTGTGGGAGAGGTGCGTGGAATTGCAGGTGTAGCGGTGAAATGCGTAGATAT  
CTGCAGGAACACCCGTGGCGAAAGCGGCGCACTGGACCACAACCTGACGCTGAGGAACGAA  
AGCTAGGGGAGCAAACAGGATTAGATACCCCTGTAGTCC

>Otu114

CCAGCCTATGGGGGGCAGCAGTCGAGAATATTCGACAATGGGCGAAAGCCTGATCGAGCG  
ACACCGCGTGCAGGATGAAGGCCTTCGGGTGCTAAACTGCGGTAGATAAGTAACAACGTA  
AGTGAGTGCTTATCGGAAAGAGGTGGGTAACCTACGTGCCAGCACCAGCGGTAAAACGTAG  
ACCTCAAGCGTTATCCGGATTTATTGGGCGTAAAGCGCGTGTAGGTGGCTTCGCACGTCT  
TCTGTTAAAGCCCAGGGCCTAACCCCTGGAAGTGCAGGAGATACGGCGGAGCTAGAGGAGG  
TTAGAGGTGCATGGAACGCACGGTGTAGGGGTGAAATCCGTTGATATCGTGCGGAATACC  
AAAGGCGAAGGCATTGCACTGGGACCTTCCTGACACTGAGCCGCGAAAGCGTGGGGAGCA  
AAAAGGATTAGAGACCCGTGTAGTCC

>Otu115

CCAGCCTATGGGAGGCAGCAGTGGGGAATCTTGCAACAATGGGGGAAACCCCTGATGCAGCG  
ACGCCGCGTGAGCGATGAAGCCCTTCGGGGTGTAAGCTCTTTTCGACGGGAACGATAATG  
ACGGTACCCGGAGAAGAAGCTGCGGCTAACTACGTGCCAGCAGCCGCGGTAATACGTAGG  
CAGCAAGCGTTGTTCCGAGTTACTGGGCGTAAAGAGTGCCTAGGCGGTTCCGCAAGTTTG  
GTGTGAAATCTCCCGGCTTAACCTGGGAGGGTGCGCCGAAAACCTGCGGGGCTGGAGTGTGG  
GAGAGGTAAGCGGAATTCCTGGTGTAGCGGTGAAATGCGTAGATATCAGGAGGAACACCG  
GCGGTGTAGACGGCTTACTGGACCATGACTGACGCTGAGGCACGAAAGCGTGGGGAGCAA  
ACAGGATTAGAAACCCCTGTAGTCC

>Otu116

CCAGCCTATGGGGGGCTGCAGTCGCGAAAACTTTGCAATACACGAAAGTGTGACAGGGTC  
ATCCCGAGTGCCGACCGCTGAGGTTGGCTTTTACCCAGTCTAGAAAGCTGGGGGAATAAG  
GAGAGGGCAAGTCTGGTGTGACCCGCCGCGGTAATACCAGCTCTCCGAGTGGTGTGGACG  
TTTATTGGGCCTAAAGCATCCGTAGCTGGCTGGACAAGTCCCCTGTTAAACCCACCGATT  
TAATCGTTGGCTTGCGGGGGGATACTGCTCGGCTAGGGGACGAGAGAGGCAGACGGTATTC  
CCGGGGTAGGGGTGAAATCCTATAATCCCGAGAAGACCACCAGTGGCGAAGGCTGTCTGC  
TAGAACGCGCCCCGACGGTGAGGGATGAAAGCTGGGGGAGCGAACC GGATTAGAGACCCCA  
GTAGTCC

>Otu117

CCAGCCTACGGGTTGCTGCAGTCGAGAATATTCACAATGGGGGAAACCCCTGATGGAGCG  
ACACCGCGTGGGGGATGAAGGCCTTCGGGTGCTAAACCCCTTTTATATGGGACGAAGCGC  
AAGCTGACGGTACCATACGAATAAGAGGTTGCTAACTCTGTGCCAGCAGCAGCGGTAATA  
CAGAGACCTCAAGCGTTATCCGGATTCACTGGGCGTAAAGCGTCCGCAGGTGGTTTGTTA  
AGTCGTTTGTCAAATCCCGGTGCTCAACATCGGAACTGCGAACGATACTGGCAAACCTTGA  
GGATGGAAGAGGTAAGAGGAACTGCTGGTGTAGTAGTAAAATGCGTTAATATCAGCAGGA  
ACACCAAAGGCGAAGGCATCTTACTGGGACATTCTTGACACTCATGGACGAAAGCGTGGG  
GAGCAAAACGGATTAGAAACCCCTTGTAGTCC

>Otu118

CCAGCCTATGGGGGGCACCAGTCGAGGATCTTCGTCAATGGGCGCAAGCCTGAACGAGCG  
ACGCCGCGTGCGCGATGAAGGCCTTCGGGTGCTAAAGCGCGAAAGTGGGGAGAAAGGGAA  
ACTTGATCAATCCACAGTAAGGACGGGCTAAGTTCGTGCCAGCAGCCGCGGTAAGACGAA  
CTGTCCTAACGTTGTTCCGAATCACTGGGCTTAAAGGGCGCGTAGGCGGTCCAACAAGTC  
GGGGGTGAAATCCTGCAGCTTAACCTGCAGAAGTGCCTTCGATACTGTTGGTCTCGAGGGA  
GATAGGGGTGTGCGGAACCTCCAGTGGAGCGGTGAAATGCGTTGATATTGGAAGGAACGC  
CGGAGGCGAAAGCGGCGCACTGGATCTCTTCTGACGCTGAGGCGCGAAAGCTAGGGGAGC  
AAACGGGATTAGATACCCCCGTAGTCC

>Otu119

CCAGCCTATGGGTGCGCAGCAGTGGGGAATCTTGCAACAATGGGGGAAACCCCTGATGCAGCG  
ACGCCGCGTGAGCGATGAAGCCCTTCGGGGTGTAAGCTCTTTTCGGCAGGGAAGATAGTG  
ACGGTACCTGCAGAAGCAGCTGCGGCTAACTACGTGCCAGCAGCCGCGGTAATACGTAGG

CAGCGAGCGTTGTTTCGGAGTTACTGGGCGTAAAGGGTGTGTAGGCGGTTGTTTAAAGTTTG  
GTGTGAAATCTCCCGGCTCAACTGGGAGGGTGCGCCGAATACTGAATGACTTCGAGTGCG  
GGAGAGGAAAGTGGAAATTCCTGGTGTAGCGGTGAAATGCGTAGATATCAGGAGGAACACC  
GGTGGTGTAGACGGCTTTCTGGACCGTAACTGACGCTGAGACACGAAAGCGTGGGTAGCA  
AACAGGATTAGAAACCCCTTGTAGTCC

>Otu120

CCAGCCTATGGGTCGCTGCAGTGGGGAATTTTGCGCAATGGGGGAAACCCCTGACGCAGCA  
ACGCCGCGTGAGGATGAAGTCCCTTGGGACGTAAACTCCTTTTCGACCAAGACGATAATG  
ACGGTACTGGTGGAAGAAGCACCGGCTAACTCTGTGCCAGCAGCCGCGGTAATACAGAGG  
GTGCAAGCGTTGTTTCGGAATTATTGGGCGTAAAGGGCGCGTAGGCGGCGCGACAAGTCAC  
CTGTGAAATCTCCGGGCTTAACTCGGAGCCTGCAGGCGAAACTGTCTGTCTGGAGTATGG  
GAGAGGTGCGTGGAATTCCTGGTGTAGCGGTGAAATGCGTAGATATCGGGAGGAACACCT  
GTGGCGAAAGCGGCGCACTGGACCATAACTGACGCTGAGGCGCGAAAGCTAGGGGAGCAA  
ACAGGATTAGATACCCTTGTAGTCC

>Otu121

CCAGCCTATGGGTGGCAGCAGTGGGGAATCTTGCAACAATGGACGAAAGTCTGATGCAGCA  
ACGCCGCGTGGGGGATGAAGCTTCTCGGAGTGTAACCCCTTTTCGACCCGGAAGAATGCC  
CGCAAGGGTTTGACGGTACGGGTATAAGAAGCCCCGGCTAACTACGTGCCAGCAGCCGCG  
GTAATACGTAGGGGGCCAGCGTTGCTCGGAATTACTGGGCGTAAAGGGTCCGTAGGCGGT  
GCGGCAAGTCGATAGTGAATCCCTAGGCTTAACCTAGGGGCTGCTAGCGAAACTGCCGT  
GCTAGAGTGTGAGAGAGGCGAGTGGAATTACGGGTGTAGCGGTGAAATGCGTAGATATCC  
GTAGGAACATCCGAGGCGAAAGCGGCTCGCTGGATCACAACCTGACGCTGAGGGACGAAAG  
CTAGGGGAGCAAACAGGATTAGATACCCTAGTAGTCC

>Otu122

CCAGCCTATGGGGGGCAGCAGTAGGGAATATTGGTAATGGGCGAAAGCCTGAACCAGCAA  
CGCCGCGTGAAACGATGAAGGCCTTCGGGTGTAAAGTTCTTTTTGGAGGGATGAGGAAGG  
ACAGTACCTCCAGAATAAGTCTCGGCTAACTACGTGCCAGCAGCCGCGGTAACACGTAGG  
AGACTAGCGTTATCCGGATTTACTGGGCGTAAAGCGTGTGCAGGCGGCTCGGATAGTTGG  
ATGTGAAAGCTCCTGGCTTAACTGGGAGAGGTGCTTCAATACTTCCGAGCTAGAGGATGA  
GAGAGGGAGGTGGAATTCCTGGGTGTAGTGGTGAATGCGTAGATATCCGGAGGAACACCA  
GTGGCGAAAGCGGCCTCCTGGCTCATTTCTGACGCTCATAACGAAAGCTAGGGTAGCAA  
ACGGGATTAGAAACCCCGTAGTCC

>Otu123

CCAGCCTATGGGGTGCAGCAGTAGGGAATATTGGACAATGGGCGCAAGCCTGATCCAGCC  
ATCCCGCGTGAAAGGATTAAGGCCCTATGGGTGTAAACTTCTTTTCTCTGGGAATAAAAA  
GTGGGATTTATCCTGCCTTGAAGGTACCAGAGGAATAAGCACCGGCTAACTCCGTGCCAG  
CAGCCGCGGTAATACGGAGGGTGCAAGCGTTATCCGGATTCCTGGGTTTAAAGGGTGCG  
TAGGTGGCTTTGTAAGTCAGTGGTGAAGCCCCGAGCTCAACTCCGGAAGTCCATTGAT  
ACTGCTTAGCTTGAATCAGATTGAGGTGGATGGAATATTACATGTAGCGGTGAAATGCTT  
AGATATGTAATAGAACACCGATTGCGAAGGCAGTTCACTAAGTCTGTATTGACACTGAGG  
CACGAAAGCGTGGGGATCAAACAGGATTAGATACCCTAGTAGTCC

>Otu124

CCAGCCTACGGGGGGCTGCAGTTGGGAATTTTGGACAATGGGGGAAACCCCTGATCCAGCC  
ATGCCGCGTGAGTGATGAAGGCCTTAGGGTTGTAAAGCTCTTTTACCCGGAAGATAATG  
ACTGTACCGGGAGAATAAGCTCCGGCTAACTTCGTGCCAGCAGCCGCGGTAATACGAAGG  
GGGCTAGCGTTGTTTCGGAATTACTGGGCGTAAAGCGCGCGCAGGCGGCAATCAAGTCAG  
GGGTGAAAGCCCAGAGCTCAACTCTGGAAGTGCCTTTGAAACTGTTTGCTAGAGGACGG  
GAGAGGTGAGTGGAATTCCTAGTGTAGAGGTGAAATTCGTAGATATTGGGAAGAACACCG  
GTGGCGAAGGCGGCTCACTGGCCCGTTTCTGACGCTCAGGCGCGACAGCGTGGGGATCAA  
ACAGGATTAGAGACCCGTGTAGTCC

>Otu125

CCAGCCTATGGGGGGCAGCAGTGGGGAATTTTGCGCAATGGGGGAAACCCCTGACGCAGCA  
ACGCCGCGTGAGGATGAAGTACTTCGGTACGTAAACTCCTTTTCGATCGGGACGATAATG  
ACGGTACCGGAAGAAGAAGCCCCGGCTAACTTCGTGCCAGCAGCCGCGGTAATACGAGGG  
GGGCAAGCGTTGTTTCGGAATTATTGGGCGTAAAGGGTGCGTAGGCGGTTTGGTAAGTCTT  
GTGTGAAATCTCCGGGCTCAACTCGGAGTCTGCATAGGAAACTGCCGGGCTTGAGTGTGG  
GAGAGGTGAGTGGAATTTCCGGTGTAGCGGTGAAATGCGTAGATATCGGAAGGAACACCT  
GTGGCGAAAGCGGCTCACTGGACCACAACCTGACGCTGATGCACGAAAGCTAGGGGAGCAA

ACAGGATTAGAGACCCGTGTAGTCC

>Otu126

CCAGCCTATGGGTGGCTGCAGTTTCGAATCATTCACAATGGGCGAAAGCCTGATGGTGC  
ACGCCGCGTGAGGGATGAAGTCTTCGGATTGTAAACCTCTGTCACTGGGGAAGAAACGC  
TTCAGGTTAATAGCCTGAAGCCTGACTTAACCCGGAGAGGAAGCAGTGGCTAACTCTGTG  
CCAGCAGCCGCGGTAATACAGAGACTGCAAGCGTTATTTCGGATTCACTGGGCGTAAAGGG  
TGCGCAGGTGGCCAAGTGTGTGAGGCGTGAAAGCCCGTTGCTCAACAGCGGAATTGCACC  
TCAAACCTACATGGCTAGAGCATTGGAGAGGGGAGCAGAATTCACGGTGTAGCAGTGAAAT  
GCGTAGATATCGTGAGGAATACCAGAGGCGAAGGCGGCTCCCTGGACAATTGCTGACACT  
CAGGCACGAAAGCGTGGGGAGCAAAAGGGATTAGAAACCCCCGTAGTCC

>Otu127

CCAGCCTATGGGAGGCAGCAGTCGAGAATTTTTCTCAATGGGCGCAAGCCTGAAGGAGCG  
ACGCCGCGTGAGGATGAATGGCTTCGGCCCGTAAACTCCTGTCATTTGCGAACAAATTA  
ATCCGCCCAACACGCGGATTATTGATTGTAGCGGAAGAGGAAGGGACGGCTAACTCTGTG  
CCAGCAGCCGCGGTAATACAGAGGTCCCGAGCGTTGTTTCGGATTTACTGGGCGTAAAGGG  
TGCGTAGGCGGCGGGGTGAGTCTGACGTGAAATCTCCGGGCCCAACCCGAAACGGCGTT  
GGATACTGCCCCGCTCGAGGATTGGAAGGGAGACTGGAATACTTGGTGTAGCAGTGAAAT  
GCGTAGATATCAAGTGGAACACCAGTGGCGAAGGCGAGTCTCTGGACAATTCCTGACGCT  
GAGGCACGAAAGCCAGGGGAGCAAACGGGATTAGAGACCCCCGTAGTCC

>Otu128

CCAGCCTACGGGGGGCAGCAGGCGCGAAAACTTTACAATGCCGGCAACGGCGATAAGGGG  
ACCTCGAGTGCCAGGATACAATCCTGGCTGTCGTAATGCCTAAAAAGCATTGCATAGCAA  
GGGCCGGGCAAGACCGGTGCCAGCCGCCGCGGTAACACCGGCGGCTCGAGTGGTAACCGC  
TATTATTGGGTCTAAAGGGTCTGTAGCCGGCTGACTAAGTCTCTTGGGAAATCTGGCAGC  
TTAACTGTCAAGCTTTCAGGGGATACTGATCGGCTCGAGACCGGGAGAGGTGAGAGGTAC  
CTCAGGGGTAGGGGTGAAATCTTGTAATCCTTGAGGGACCACCAGTGGCGAAGGCGTCTC  
ACCAGAACGGATCTGACGGCAAGGGACGAAAGCTAGGGGCACGAACCGGATTAGAAACCC  
CGGTAGTCC

>Otu130

CCAGCCTACGGGTTGCTGCAGTCGAGAATTTTTCTCAATGGGCGAAAGCCTGAAGGAGCG  
ACGCCGCGTGAGGGATGAATGGCTTCGGCCCGTAAACCCCTGTCAATTTGCGAACAAATTG  
GTTACCTAACACGTGAACCATTTGATAGTAGCGGAAGAGGAAGGGACGGCTAACTCTGTG  
CCAGCAGCCGCGGTAATACAGAGGTCCCAAGCGTTGTTTCGGATTCACTGGGCGTAAAGGG  
TGCGTAGGTGGTCGGGTAAGTCTGTTGTGAAATCTCCGAGCTTAACCTCGGAAATGGCAGT  
GGATACTATCCGGCTAGAGGAATGGAGGGGAGACTGGAATACTTGGTGTAGCAGTGAAAT  
GCGTAGATATCAAGTGGAACACCAGTGGCGAAGGCGAGTCTCTGGACATTTCTGACGCT  
GAGGCACGAAAGCCAGGGGAGCAAACGGGATTAGAAACCCCCGTAGTCC

>Otu131

CCAGCCTATGGGTGCGACCAGGGAGGAATATTGGGCAATGGACGAAAGTCTGACCCAGCA  
ACGCCGCGTGAAAGATGAAGGCCTTCGGGTCGTAAACTTCTTTTAAGGGAGACGAGAAAG  
GACGGTATCCCTTGAATAAGCCACGGCTAACTACGTGCCAGCAGCCGCGGTAAAACGTAG  
GTGGCGAGCGTTATCCGGATTCAATTGGGCGTAAAGAGCTTGTAGGTGGCTAGATAAGTTG  
GACGTGAAAACCTCCGGGCTTAACCTGGAGAGGCCGTTCAATACTGTTTGGCTAGAGGATG  
TCAGAGGGAAGTAGAATTCCTAGTGTAGCAGTGAAATGCGTAGATATTAGGAGGAATACC  
CGTGGCGAAGGCGGCTTCCTGGGGCAAACCTGACACTGAGAAGCGAAAGCTAGGGGAGCA  
AACGGGATTAGAAACCCCAGTAGTCC

>Otu132

CCAGCCTATGGGTGCGAGCAGTAGGGAATATTGCACAATGGGCGAAAGCCTGATGCAGCA  
ACGCCGCGTGACGAAGAAGGTCTTCGGATCGTAAAGTGCTTTTCTGAGAGATGAGAAAG  
GACAGTATCTCAGGAATAAGTCTCGGCTAACTACGTGCCAGCAGCCGCGGTAAAACGTAG  
GAGGCAAGCGTTATCCGGATTCACTGGGCGTAAAGCGCATGCAGGCGGTTCCGTAAGTTG  
GGCGTGAAATCTCCCGGCTCAACTGGGAGAGGTGCTTCAATACTACCGGGCTAGAGAGCA  
GTAGAGGAAGATGGAATTCCTGGTGTAGTGGTGAAATGCGTAGATATCGGGAGGAACACC  
AGTGGCGAAGGCGATCTTCTGGACTGTTTCTGACGCTCATATGCGAAAGCTAGGGTAGTA  
AACGGGATTAGATACCCTAGTAGTCC

>Otu133

CCAGCCTACGGGGGGCAGCAGTAAGGAATATTGGTCAATGGACGCAAGTCTGAACCAGCC  
ATGCCGCGTGACAGGATGACAGCCCTACGGGTTGTAAACTGCTTTTGTACGGGAAAAAAC

TTCGGTCGTGAACCGGAGCTGATGGTACCGTAAGAATAAGCATCGGCTAACTCCGTGCCA  
GCAGCCGCGGTAATACGGAGGATGCAAGCGTTATCCGGATTTCATTGGGTTTAAAGGGTGC  
GCAGGCGGAATGATAAGTCAGTGGTGAAATCCTACAGCTTAACTGTAGAACTGCCATTGA  
TACTGTCGTTCTTGAGTACAGTTGGAGTGGGCGGAATGTGTCATGTAGCGGTGAAATGCT  
TAGATATGACACAGAACACCACTCGCGAAGGCAGCTCGCTAACTGTAACTGACGCTCAT  
GCACGAAAGCGTGGGGATCAAACAGGATTAGAAACCCTCGTAGTCC

>Otu134

CCAGCCTACGGGTGGCACCAGTCGCGAAAACTTCACAATGGGGGAAACCCCGATGAGGGA  
ATTCCAAGTGCTAGCACTATGTGTTAGCTGTTCCCCTGTCTAAAAACAGGAGAAGTAAG  
GGCCGGGTAAGACGGGTGCCAGCCGCGCGGTAATACCCGCGGCCCGAGTGGTGGTTCGAT  
ATTATTGAGCCTAAAACGTCCGTAGCCGGTCTTGTAATCCTTGAGTAAATCGGCCAGCT  
CAACTGTCCGAAGTTCGGGGAGACTGCAAGACTTGGGATCGGGAGAGGTCAGAGGTAATT  
CTGGGGTAGGGGTAAAATCCTGTAATCCTGGAAGGACCACCGGTGGCGAAGGCGTCTGAC  
TAGAACGAATTTCGACGGTGAGGGACGAAGCCCTGGGGCGCAAACGGGATTAGAAACCCTC  
GTAGTCC

>Otu135

CCAGCCTACGGGTGGCACCAGTAGGGAATATTGCACAATGGGCGAAAGCCTGATGCAGCA  
ACGCCGCGTGACGATGAAGGCCTTCGGGTCTGTAAGTGCTTTTCGGGGAGATGAGGAAG  
GACAGTATCCCCGGAATAAGGCTCGGCTAACTACGTGCCAGCAGCCGCGGTAAAACGTAG  
GAGCCTAGCGTTATCCGAATTCCTGAGGCGTAAAGCGCGTGACAGGCGGTCCGGTAAGTTG  
GATGTGAAATCTCCTGGCTCAACTGGGAGAGGACGTTCAATACTGTGCGACTAGAGGACG  
GTAGAGGGAGGTGGAATTCCCGGTGTAGTGGTGAAATGCGTAGATATCGGGAGGAACACC  
AGTGGCGAAAGCGGCCTTCTGGGCCGTTCTGACGCTCAGACGCGAAAGCTAGGGGAGCA  
AACGGGATTAGAAACCCTTGTTAGTCC

>Otu136

CCAGCCTACGGGTGCTGTCAGCAGGGAATATTGGTAATCTGCGAAAGCGGGAACCAGCAA  
CGCCGCGTGTGCGATGAAGGCCTTCGGGTCTGTAAGCACTTTTCGAGGGGATGAGGAAGG  
ACAGTACCCTCGGAATAAGTCTCGGCTAACTACGTGCCAGCAGCCGCGGTAAAACGTAGG  
AGGCGAGCGTTATCCGGATTTACTGGGCGTAAAGCGTGTCAGGCGGTTCGGTAAGTTGG  
ATGTGAAAGCTCCCGGCTCAACTGGGAGAGGTGCTTCAATACTGCTGGACTTGAGGATGG  
TAGAGGGAGGTGGAATTCCCGGTGTAGTGGTGAAATGCGTAGATATCCGGAGGAACACCA  
GTGGCGAAAGCGGCCTCCTGGACCATTTCTGACGCTCAGACACGAAAGCTAGGGGAGCAA  
ACGGGATTAGATACCCCGGTAGTCC

>Otu137

CCAGCCTATGGGGGGCACCAGGCGGAAACCTTTACAATGCGCTAACGCGTGATAAGGGT  
ACTCCAAGTGCTCATGTTTTACATGGGCTTTTGCCAAGGGCGAATACCTTGCGGAATAAG  
TGGTGGGTAAGACTGGTGCCAGCAGCCGCGGTAACCCAGCGCCACAAGTGGTGATCGGT  
TTTATTGGGCCTAAAGCATCCGTAGCTGGCCAAAAAGTCTCTTGTAATCGGGACGCT  
TAACGTACCGGACTGCAGGAGATACTATTTGGCTTGGAAGTGGGAGGAGCAAGAGGAATT  
TTGGGGGAAGCGGTAAAATGCTATAATCCCCAAAAGACCACCGATGGCGAAGGCATCTTG  
CTAGAACAGATTCGACAGTCAGGGATGAAAGCTAGGGGAGCAAACCGGATTAGATACCTT  
CGTAGTCC

>Otu138

CCAGCCTATGGGTGGCTGTCAGTTGGGAATCTTGACAATGGGGGAAACCCTGATGCAGCG  
ACGCCGCGTGAGGATGACGGGTCTAGGCCTGTAACTCCTTTTAACGGGAAAGACTTAG  
GACGGTACCCGTTGAATAAGGACCGGCTAACTACGTGCCAGCAGCCGCGGTAAGACGTAG  
GGTCCAAGCGTTGTCCGATTTACTGGGCGTAAAGAGCGGTAGGCGGTCTGTTAAGTGT  
GAAGTGAATCTCCAGGGCTCAACCCGGAAGTCTTCGCATACTGGCAGACTGGAGGGA  
TGCAGAGGTTTGTGGAATTCCTGGTGTAGCGGTGAAATGCATAGATATCAGGAGGAACAC  
CCATGGCGAAGGCAGCAAACCTGGGCATCATCTGACGCTGAGGCGCGAAAGCGTGGGTAGC  
AAACAGGATTAGAAACCCTGTAGTCC

>Otu139

CCAGCCTATGGGATGCAGCAGTGGGGAATCTTGGAATGGAGGAACTCTGATCCAGCC  
ATGCCGCGTGAGTGATGAAGGCCTTAGGGTTGTAAACTCTTTTCGGCGGGGACGATAATG  
ACGGTACCCGCGAGAAGAAGCTCCGGCTAACTTCGTGCCAGCAGCCGCGGTAATACGAAGG  
GGGCTAGCGTTGTTCCGAATTACTGGGCGTAAAGCGCGCGCAGGCGGCCTTTCAAGTCAG  
GGGTGAAAGCCCGGAGCTCAACTCCGGAATTGCCTTTGAAACTGCAAGGCTTGAGTACGG  
GAGAGGTGAGTGGAATTCACAGTGTAGAGGTGAAATTCGTAGATATTGGGAAGAACACCG

GTGGCGAAGGCGGCTCACTGGCCCGTAACTGACGCTCAAGCGCGACAGCGTGGGGATCAA  
ACAGGATTAGAGACCCGAGTAGTCC

>Otu141

CCAGCCTATGGGTGTGCTGCAGTAAGGGATATTGCGCAATGGGCGAAAGCCTGACGCAGCA  
ACGCCGCGTGAAGGATGAAGGCCTTCGGGTGTAAACTTCTTTTACCGGGGACGAGGAAG  
GACGGTACCCGCGCAACAAGTCACGGCTAACTACGTGCCAGCAGCCGCGGTAAAACGTAG  
GTGGCGAGCGTTATCCGGATTACTGGGTGTAAAGCGTGTGCAGGCGGAAGGGTAAGTGG  
TGTATGAAATCGCCCGGCTCAACCGGGCGGGGTATGCCAGACTGCTCATCTAGAGGACG  
AGAGAGGGGCGTGGAATTCCGGGTGTAGTGGTGAATGCGTAGAGATCCGGAGGAACCCC  
CGAGGCGAAGGCGGCGCCCTGGCTCGTACCTGACGCTCAGACACGACAGCATGGGGAGCG  
AACGGGATTAGAAACCCGTGTAGTCC

>Otu142

CCAGCCTATGGGGGGCAGCAGTGGGGAATATTGGACAATGGGCGAAAGCCTGATCCAGCC  
ATGCCGCGTGAGTGATGAAGGCCTTAGGGTGTAAAGCTCTTTTACCGGGGAAGATAATG  
ACGGTACCGGGAGAATAAGCCCCGGCTAACTTCGTGCCAGCAGCCGCGGTAAATACGAAGG  
GGGCTAGCGTTGTTTCGAATTACTGGGCGTAAAGCGCACGTAGGCGGATTTTTAAGTCAG  
GGGTGAAATCCCGAGGCTCAACCTCGGAACCTGCCTTTGATACTGGGAATCTTGAGTCCGG  
GAGAGGTGAGTGGAATGCGAGTGTAGAGGTGAAATTCGTAGATATTGCAAGAACACCA  
GTGGCGAAGGCGGCTCACTGGCCCGGTACTGACGCTGAGGTGCGAAAGCGTGGGGAGCAA  
ACAGGATTAGAAACCCCTAGTAGTCC

>Otu143

CCAGCCTACGGGGGGCAGCAGTAAGGAATATTGGTCAATGGACGCAAGTCTGAACCAGCC  
ACGCCGCGTGACAGGATGAAGGCGCTCTGCGTCGTAAACTGCTTTTTACAGGGAAGAAAAG  
ATTTGTTTTCTACAGATTTTGACGGTACCTGAGGAATAAGCACCGGCTAACTCCGTGCCAG  
CAGCCGCGGTAAATACGGAGGGTGCAAGCGTTATCCGGATTTACTGGGTTTAAAGGGTGCG  
TAGGCTGATTGATAAGTCAGTGGTGAAATCCTCGGGCTCAACCCGGGAATTGCCGTTGAT  
ACTATTAGTCTTGAATATAGTTGAGGTAAGCAGAATGCGTGGTGTAGCGGTGAAATGCTT  
AGATATCACGCAGAATACCGATTGCGAAGGCAGCTTGCTAAACTATTATTGACGCTGAGG  
CACGAAAGCGTGGGGATCAAACAGGATTAGAGACCCTAGTAGTCC

>Otu144

CCAGCCTATGGGGGGCAGCAGTAGGGAATATTGCACAATGGGCGAAAGCCTGATGCAGCA  
ACGCCGCGTGATGATGAAGGCCTTCGGGTGCTAAAGTGCTTTTCTGAGAGATGAGAAAG  
GACAGTATCTCAGGAATAAGTCTCGGCTAACTACGTGCCAGCAGCCGCGGTAAAACGTAG  
GAGGCGAGCGTTATCCGGATTACTGGGCGTAAAGCGTGTGCAGGCGGTTCCGTAAGTTG  
GGCGTGAAATCTCCTGGCTTAACTAGGAGAGGTCGTTCAATACTACCAGACTTGAGAGCA  
GTAGAGGAAGATGGAATTCCCGGTGTAGTGGTGAATGCGTAGATATCGGGAGGAACACC  
AGTGCGGAAGGCGATCTTCTGGACTGTTTCTGACGCTCATAACGAAAGCTAGGGTAGTA  
AACGGGATTAGAGACCCTTGTAGTCC

>Otu145

CCAGCCTATGGGGGGCACCAGGCGCGAAAACCTCTACAATGCAGGCAACTGCGATAGGGGG  
ACATCGAGTGGCACCCACCTTGGGTGTCTGTCCAACCGTCTAAAAAACGGTTGTTAGCAA  
GGGCCGGGTAAAGACCGGTGCCAGCCGCCGCGGTAAATACCGGCGGCTCGAGTGGTGGCCGA  
TATTATTGAGTCTAAAGGGTCCGTAGCCGGCTTTGCAAGTCCTCTGGGAAATCCAGCGGC  
TTAACCGTTGGGCTTCCATGGGAACTACATTGCTTGGGACTGGGAGAGGTAGGAGGTAC  
TCGAGGGGTAGGGGTGAAATCCTGTAATCCTTCGGGGACCACCGGTGGCGAAGGCGTCCT  
ACCAGAACAGGTCCGACGGTGAGGGACGAAAGCTAGGGGCACGAACCGGATTAGAAACCC  
TAGTAGTCC

>Otu146

CAGCCTACGGGGGGCTGCAGTGGGGAATATTGGACAATGGGCGAAAGCCTGATCCAGCAA  
TGCCGCGTGAGTGATGAAGGCCTTAGGGTGTAAAGCTCTTTCGCACGCGACGATGATGA  
CGGTAGCGTGAGAAGAAGCCCCGGCTAACTTCGTGCCAGCAGCCGCGGTAAATACGAAGGG  
GGCTAGCGTTGTTTCGAATTACTGGGCGTAAAGGCGCGTAGGCGGTTTATCTAGTCAGG  
CGTGAAAGCCCCGGGCTCAACCTGGGAATTGCGTTTGATACTGGTAGACTTGAGTTCGGG  
AGAGGTGAGTGGAATTCCCAGTGTAGAGGTGAAATTCGTAGATATTGGGAAGAACACCGG  
TGGCGAAGGCGGCTCACTGGACCGATACTGACGCTGAGGCGCGAAAGCGTGGGGAGCAAA  
CAGGATTAGATACCCTAGTAGTCC

>Otu148

CCAGCCTACGGGGGGCAGCAGTCGAGAATATTGACAATGGGCGAAAGCCTGATCGAGCG

ACACCGCGTGCAGGATGAAGGCCTTCGGGTCGTAAACTGCGGTAGTATGGTAACAATGCA  
AATGAGTGCCATACGGAAAGAGGTGGGTAACTACGTGCCAGCACCAGCGGTAATACGTAG  
ACCTCAAGCGTTATCCGGATTTATTGGGCGTAAAGAGCATGTAGGAGGTTTTGTGCGTCT  
TCTGTTAAAGCCCGGAGCCTAACTTCGGAAATGCAGGAGATACGACAGAACTAGAGGAGG  
TTAGAGGTGCATGGAACCTCACGGTGTAGGGGTGAAATCCGTTGATATCGTGGGGAACACC  
AAAGGCGAAGGCAGTGCCTGGGACCTTCCTGACTCTGAGATGCGAAAGCGTGGGGAGCA  
AAAAGGATTAGATACCCTCGTAGTCC

>Otu149

CCAGCCTATGGGGGGCACCAGTAAGGAATATTGGTCAATGGGCGGAAGCCTGAACCAGCC  
ATGCCGCGTGCAGGAAGACGGCCCTACGGGTTGTAAACTGCTTTTGCAGGGGAATAAACC  
TCCCAGCAGTGCAGGAGCTGAATGTACCTTGAGAATAAGGATCGGCTAACTCCGTGCCAG  
CAGCCGCGGTAATACGGAGGATCCGAGCGTTATCCGGATTTATTGGGTTTAAAGGGTGCG  
TAGGCGGCCTATTAAGTCAGGGGTGAAAGACGGTAGCTCAACTATCGCAGTGCCTTTGAT  
ACTGATGGGCTTGAATGTACTTGAGGTAGGCGGAATGTGACAAGTAGCGGTGAAATGCAT  
AGATATGTCACAGAACACCAATTGCGAAGGCAGCTTACTAAAGTATGATTGACGCTGAGG  
CACGAAAGCGTGGGGATCAAACAGGATTAGAAACCCCAGTAGTCC

>Otu150

CCAGCCTATGGGGGGCTGCAGTTTTCGAATCATTCAACAATGGGCGAAAGCCTGATGGTGCG  
ACGCCGCGTGAGGGATGAAGGTCTTCGGATTGTAAACCTCTGTCACCGGGGAAGAAACGC  
TTTGAGCTAATAGTTCAAAGCCTGACTTAACCCGGAGAGGAAGCAGTGGCTAACTCTGTG  
CCAGCAGCCGCGGTAATACAGAGACTGCGAGCGTTATTTCGGATTCCTGAGCGTAAAGGG  
TGCGCAGGCGGCCATGTGTGTGAGGCGTGAAAGCCCGGAGCTTAACTCCGGAATTGCACC  
TCAAACCTACATGGCTAGAGCATTGGAGAGGGTAGCAGAATTCACGGTGTAGCAGTGAAAT  
GCGTAGATATCGTGAGGAATACCAGAGGCGAAGGCGGCTACCTGGACAATTGCTGACGCT  
CAGGCACGAAAGCGTGGGGAGCAAAGGGGATTAGAGACCCCAGTAGTCC

>Otu151

CCAGCCTATGGGGGGCACCAGTAAGGAATATTGGTCAATGGGCGGAAGCCTGAACCAGCC  
ATGCCGCGTGCAGGAAGACGGCCCTACGGGTTGTAAACTGCTTTTGCAGGGGAATAAACC  
CCCCAACGAGTTGGGGGGCTGAAAGTACTCTGAGAATAAGGATCGGCTAACTCCGTGCCAG  
CAGCCGCGGTAATACGGAGGATCCGAGCGTTATCCGGATTTATTGGGTTTAAAGGGTGCG  
TAGGCGGCCTTGTAAAGTCAGGGGTGAAAGACGGTAGCTTAACTATCGCAGTGCCTTTGAT  
ACTGCAGGGCTTGAATGTACTTGAGGCAGGCGGAATGTGACAAGTAGCGGTGAAATGCAT  
AGATATGTCACAGAACACCAATTGCGAAGGCAGCTTGCTAAAGTATGATTGACGCTGAGG  
CACGAAAGCGTGGGGATCAAACAGGATTAGAAACCCCTTGTAGTCC

>Otu153

CCAGCCTACGGGGGGCTCCAGTGGGGAATTTTTCGCAATGGGGGAAACCCCTGACGCAGCA  
ACGCCGCGTGAGGATGAAGTCCCTTGGGACGTAAACTCCTTTTCGACCAAGACGATGATG  
ACGGTACTGGTGGAAGAAGCACCGGCTAACTCTGTGCCAGCAGCCGCGGTAATACAGAGG  
GTGCGAGCGTTGTTTCGAATTATTGGGCGTAAAGGGCGCGTAGGCGGCGCCACAAGTCAC  
TTGTGAAAACCTCTGGGCTCAACTCAGAGCCTGCAAGCGAAACTGTGGTGCTGGAGTATGG  
GAGAGGTGCGTGGAATTCCCGGTGTAGCGGTGAAATGCGTAGATATCGGGAGGAACACCT  
GTGGCGAAAGCGGCGCACTGGACCATAACTGACGCTGAGGCGCGAAAGCTAGGGGAGCAA  
ACAGGATTAGATACCCTTGTAGTCC

>Otu154

CCAGTTCGCAATGCCCGAAAGGGTGACGAAGCGACGCCGCGTGCGGGAAGAAGGCCTTCG  
GGTTGTAAACCGCTGTTCGGGAGTTAAGAAATGCAAGGATGTTAATAGCATCTTTGTTTGA  
CTAAGGCTCCGGAGGAAGCCACGGCTAACTCTGTGCCAGCAGCCGCGGTAATACAGAGGC  
GGCAAGCGTTGTTTCGAATTATTGGGCGTAAAGAGCACGTAGGCGGCTGTGTAAGTCGGT  
TGTGAAAGCCTTCCGCTCAACGGAAGAACGGCATCCGATACTGCATGGCTTGAGTGTGGG  
AGGGGAGAGTGGAACCTTCTGGTGGAGCGGTGAAATGCGTAGATATCAGAAGGAACACCGG  
CGGCGAAGGCGACTCTCTGGTCCATAACTGACGCTGAGTGTGCGAAAGCTAGGGGAGCAA  
ACGGGATTAGAAACCCCCGTAGTC

>Otu155

CCAGCCTACGGGGGGCACCAGTCGAGAATTTTTCTCAATGGGCGAAAGCCTGAAGGAGCG  
ACGCCGCGTGGGGGATGAATGGCTTCGGCCCGTAAACCCCTGTCATTTGTGAACAAATTA  
ATCTACCCAACACGTGGATTATTGATTGTAACGGAAGAGGAAGGGACGGCTAACTCTGTG  
CCAGCAGCCGCGGTAATACAGAGGTCCCAAGCGTTGTTTCGGATTCCTGAGCGTAAAGGG  
TGCGTAGGCGGTTTGACAAGTCTGATGTGAAATCCCGCAGCTTAACTGCGGAACCTGCATT

GGAAACTGTCTGACTAGAGGAATGGAGGGGAGACTGGAATGCTTGGTGTAGCAGTGAAAT  
GCGTAGATATCAAGCGGAACACCAGTGGCGAAGGCGAGTCTCTGGACATTTCTTGACGCT  
GAGGCACGAAAGCCAGGGGAGCAAACGGGATTAGATACCCCAGTAGTCC

>Otu156

CCAGCCTACGGGGGGCAGCAGGCGCGAAAACTTTACAATGCGGGAAACCGTGATAAGGGA  
ACCCCGAGTGCCCGTAAATCGGGCTGTTAACCTGTTTAAAAAGCAGGTGGAGAAAGGGC  
CGGGCAAGACCGGTGCCAGCCGCCGCGTAATACCGGCGGCTCGAGTGGTGGCCACTATT  
ACTGGGCTTAAAGCGTCCGTAGCTGGATTGTTAAGTCTCTTGGGAAATCTACCGGCTTAA  
CCGATAGGCGTTCAAGGGATACTGGCAACCTAGGGACCGGAAGAGGTGAGAGGTACTCCA  
GGGGTAGGAGTGAAATCCTGTAATCCTTGGGGGACCACCTGTGGCGAAGGCGTCTCACCA  
GAACGGCTCCGACAGTGAGGGACGAAAGCTGGGGGAGCAAACCGGATTAGATACCCCAGT  
AGTCC

>Otu157

CCAGCCTATGGGTGGCACCAGTGGGGAATATTGGACAATGGGCGAAAGCCTGATCCAGCC  
ATGCCGCGTGAGTGATGAAGGCCTTAGGGTTGTAAAGCTCTTTCGCTGGGGAAGATAATG  
ACGGTACCCAGAGAAGAAGCCCCGGCCAACTTCGTGCCAGCAGCCGCGGTAATACGAAGG  
GGGCTAGCGTTGCTCGGAATCACTGGGCGTAAAGCGCACGTAGGCGGATTTCTAAGTCAG  
GGGTGAAATCCCGGAGCTCAACTCCGGAACCTGCCTTTGATACTGGAGATCTTGAGTCCGG  
GAGAGGTGAGTGGAATCCGAGTGTAGAGGTGAAATTCGTAGATATTCGGAAGAACACCA  
GTGGCGAAGGCGGCTCACTGGCCCGGTACTGACGCTGAGGTGCGAAAGCGTGGGGAGCAA  
ACAGGATTAGAAACCCCAGTAGTCC

>Otu158

CCAGCCTACGGGGTGCTGCAGTGGGGAATCTTGCGCAATGGGGGAAACCTGACGCAGCA  
ACGCCGCGTGGGTGATGAAGGCCTTCGGGTCGTAAAGCCCTGTCAGGTGGGAAGAAACAT  
GTTGATGCCAATACCATCAACACTTGACGGTACCACCGAAGGAAGCACCGGCTAACTCCG  
TGCCAGCAGCCGCGGTAATACGGAGGGTGCAAGCGTTGTTTCGGAATTATTGGGCGTAAAG  
CGCGTGTAGGCGGTGATGTAAGTCAGATGTGAAAGCCTTCCGCTTAACGGGAGAAGTGCA  
TTTGAAACTGCATGACTAGAGTACGGGAGAGGAGAGTGGAATTCCCGGTGTAGAGGTGAA  
ATTCGTAGATATCGGGAGGAACACCAGTGGCGAAGGCGGCTCTCTGGATCGATACTGACG  
CTGAGACGCGAAAGCGTGGGTAGCAAACAGGATTAGATACCCCCGTAGTCC

>Otu159

CCAGCCTACGGGGTGCTGCAGTGGGGAATTTTGCGCAATGGGGGAAACCTGACGCAGCA  
ACGCCGCGTGAGGATGAAGTCCTTCGGGACGTAAACTCCTTTTCGATCGGGACGATTATG  
ACGGTACCGGAAGAAGAAGCCCCGGCTAACTTCGTGCCAGCAGCCGCGGTAATACGAGGG  
GGGCGAGCGTTGTTTCGGAATTATTGGGCGTAAAGGGTGCGTAGGCGGTTTTGTAGTCTT  
GTGTGAAATCTTCAGGCTCAACTTGAAGACTGCACGAGAACTGCAGGGCTTGAGTGTGG  
GAGAGGTGAGTGGAATTCCTGGTGTAGCGGTGAAATGCGTAGATATCAGGAGGAACACCT  
GTGGCGAAAGCGGCTCACTGGACCACAACCTGACGCTGAAGCACGAAAGCTAGGGGAGCAA  
ACAGGATTAGATACCCCAGTAGTCC

>Otu160

CCAGCCTATGGGGGGCAGCAGTGAGGAATATTGGTCAATGGGCGCAAGCCTGAACCAGCC  
ATGCCGCGTGAAGGATGAAGGCCTTCTGGGTGTAAACTTCTTTTATGAGGGAAGAAAAC  
TATGGTTTTCTACTATAGCCGACGGTACCTTAGGAATAAGCACCGGCTAACTCCGTGCCAG  
CAGCCGCGGTAATACGGAGGGTGCAAGCGTTATCCGGATTTACTGGGTTTAAAGGGTG  
TAGGCGGGCTTTTAAAGTCAGTGGTGAAATCTCCGGGCTCAACCCGGAACCTGCCATTGAT  
ACTATTAGTCTTGAATTTTGTGAGGTAGGCGGAATAAGTCATGTAGCGGTGAAATGCAT  
AGATATGACTTAGAACACCAATTGCGAAGGCAGCTTACTAAGCAAATATTGACGCTGAGG  
CACGAAAGCGTGGGGATCAAACAGGATTAGATACCCCTAGTAGTCC

>Otu161

CCAGCCTATGGGGTGACAGCAGTGGGGAATTTTGCGCAATGGGGGAAACCTGACGCAGCA  
ACGCCGCGTGAGGATGAAGCCCCTTGGGGTGTAACCTCCTTTTCGATCGGGACGATGATG  
ACGGTACCGGATGAAGAAGCACCGGCTAACTCTGTGCCAGCAGCCGCGGTAATACAGAGG  
GTGCAAGCGTTGTTTCGGAATTATTGGGCGTAAAGGGTGCGTAGGCGGTGCGGTAAGTCTT  
CTGTGAAATCTCCGGGCTTAACTCGGAGCCTGCAGGGGAACTGCCGTGCTGGAGTATGG  
GAGAGGTGAGTGGAATTCCTGGTGTAGCGGTGAAATGCGTAGATATCGGGAGGAACACCT  
GTGGCGAAAGCGGCTCACTGGACCATTACTGACGCTGATGCACGAAAGCTAGGGGAGCAA  
ACAGGATTAGAAACCCCCGTAGTCC

>Otu162



CCAGCCTATGGGGTGCAGCAGTGGGGAATATTGGACAATGGGCGCAAGCCTGATCCAGCA  
ATGCCGCGTGGGTGAAGAAGGCCTGCGGGTTGTAAAGCCCTTTAAGTGGGGAGGAAAAGT  
GGCGTGCAGACAGTGCAGCGGCTCTGACGTTACCCACAGAATAAGCACCGGCTAACTCCGT  
GCCAGCAGCCGCGGTAATACGGGGGGTGAAGCGTTAATCGGAATTACTGGGCGTAAAGC  
GTGCGTAGGCGGTTTCGGACAGTCAGCCGTGAAAGCCCTGGGCTTAACCTGGGAACGGCGG  
TTGAGACGGTCGGACTAGAGTGGGCTAGAGGGTCGTGGAATTTCCCGGTGTAGCGGTGAAA  
TGCGTAGAGATCGGGAGGAACACCGATGGCGAAGGCAGCGGTCTGGGGCCACACTGACGC  
TAAGGCACGAAAAGCGTGGGGAGCAAACAGGATTAGATAACCCGAGTAGTCC

>Otu164

CCAGCCTACGGGTGGCAGCAGTAAGGAATATTGGTCAATGGGCGCAAGCCTGAACCAGCC  
ATGCCGCGTGCAGGATGAAGGTCCTACGGATTGTAAACTGCTTTTGTACGGGAAAAAACC  
CCTTGTTTTCTACGAGGGTTGATGGTACTGTAAGAATAAGGATCGGCTAACTCCGTGCCAG  
CAGCCGCGGTAATACGGAGGATCCAAGCGTTATCCGGATTCACTGGGTTTAAAGGGTGCG  
TAGGCGGAATGACAAGTCAGTGGTGAAAACCTATAGCTTAACTATAGAACTGCCATTGAT  
ACTGTTATTCTTGAGTGTATTGGATGTGAATGGAATGTGTCGTGTAGCGGTGAAATGCTT  
AGATATGACACAGAACACCCATTGCGAAGGCAGTTCACAACACTACAACCTGACGCTGAGG  
CACGAAAGCGTGGGGATCAAACAGGATTAGAAACCCTAGTAGTCC

>Otu165

CCAGCCTATGGGTGTCAGCAGTGGGGAATTTTGCAGCAATGGGGGAAACCCTGACGCAGCA  
ACGCCGCGTGGAGGATGAAGTCCCTTGGGACGTAAACTCCTTTTCGATCGGGACGATAATG  
ACGGTACCGGAAGAAGAAGCCCCGGCTAACTTCGTGCCAGCAGCCGCGGTAATACGAGGG  
GGGCAAGCGTTGTTTCGAATTATTGGGCGTAAAGGGAGCGTAGGCGGTTTGGTAAGTCTT  
GTGTGAAATCTTCGGGCTCAACCCGAAGTCTGCACGAGAACTGCCGGGCTTGAGTATGG  
GAGAGGTGAGTGGAATTCCTGGTGTAGCGGTGAAATGCGTAGATATCAGGAGGAACACCT  
GTGGCGAAAGCGGCTCACTGGACCATAACTGACGCTGAGGCTCGAAAGCTAGGGGAGCAA  
ACAGGATTAGAAACCCGAGTAGTCC

>Otu166

CCAGCCTATGGGTGGCAGCAGTGGGGAATATTGGACAATGGGCGCAAGCCTGATCCAGCC  
ATGCCGCGTGAGTGATGAAGGCCTTAGGGTTGTAAAGCTCTTTTCGCTCGCGAGGATAATG  
ACGGTAGCGAGAGAAGAAGCCCCGGCTAACTTCGTGCCAGCAGCCGCGGTAATACGAAGG  
GGGCTAGCGTTGTTTCGAATCACTGGGCGTAAAGCGCTCGTAGGCGGATATTTAAGTCAG  
AGGTGAAAGCCTGGGGCTCAACTCCAGAACTGCCTTTGATACTGGGTATCTTGAGTCCGG  
TAGAGGTGAGTGGAATGCTAGTGTAGAGGTGAAATTCGTAGATATTAGCAAGAACACCA  
GTGGCGAAGGCGGCTCACTGGACCGTACTGACGCTGAGGAGCGAAAGCGTGGGGAGCAA  
ACAGGATTAGATAACCCCGTAGTCC

>Otu167

CCAGCCTATGGGGGGCAGCAGTAAGGAATATTGGTCAATGGGGGCAACCCTGAACCAGCC  
ATGCCGCGTGCAGGATGACGGCCCTATGGGTTGTAAACTGCTTTTATACAAGAGAAAACC  
CGAGTACGTGTACTCGGTTGATAGTATTGTAAGAATAAGCATCGGCTAACTTCGTGCCAG  
CAGCCGCGGTAAGACGAAGGATGCAAGCGTTATCCGGATTCATTGGGTTTAAAGGGTGCG  
TAGGCGGACTTGTAAGTCAGTGGTGAAATCTCTTTGCTTAACAAAGAACTGCCATTGAT  
ACTGCAGGTCTAGAGTATAGATGACGTTGGCGGAATATGACATGTAGTGGTGAAATACTT  
AGATATGTCATAGAACACCGATTGCGAAGGCAGCTAACGAACTATAACTGACGCTGAGG  
CACGAAAGTGCGGGGATCAAACAGGATTAGAAACCCGTGTAGTCC

>Otu168

CCAGCCTATGGGGGGCAGCAGTGGGGGATATTGGACAATGGGGGGAACCCTGATCCAGCG  
ATGCCGCGTGGGTGAAGAAGGCCTTTGGGTTGTAAAGCCCTTTAAGTTGGGAAGAAGGAC  
TGATGTTTTAAGAGATATTAGTTTTGACGGTACCGACGAAATAAGCACCGGCAAACTCTGT  
GCCAGCAGCCGCGGTAATACAGAGGGTGCAGCGTTAATCGGAATTACTGGGCGTAAAGG  
GCGCGTAGGCGGTGAGTTTTAGTGGGATGTGAAAGTCCAGGGCTTAACCTTGGGATTGCAT  
ACTATACGGACTGACTGGAGTACGGGAGAGGGTGGCGGAATTTCCGGTGTAGCGGTGAAA  
TGCGTAGAGATCGGAAGGAACGTGATGGCGAAGGCAGCCACCTGGCCTGATACTGACGC  
TGAGGCGCGAAAGCGTGGGGAGCGAACAGGATTAGATAACCCTAGTAGTCC

>Otu169

CCAGCCTATGGGTTGCTCCAGGCGCGAAAACTTTACAATGCGGGAAACCGTGATAAGGGGA  
ACTCCGAGTGCCCGTTAAATCGGGCTGTCCACCAGTTTAAATAACTGGTGAAGAAAGGGC  
CGGGCAAGACCGGTGCCAGCCGCCGCGGTAATACCGGCGGCTCGAGTGGTGGCCACTATT  
ACTGGGCTTAAAGCGTTCGTAGCTGGTTTGTAAAGTCTCTGGGGAAATCTACCGGCTTAA

CCGGTAGGCGTCTCAGGGATACTGGCAGACTAGGGACCGGGAGAGGTGAGAGGTACTCCA  
GGGGTAGGAGTGAAATCCTGTAATCCTTGGGGGACCACCTGTGGCGAAGGCGTCTCACCA  
GAACGGCTCCGACAGTGAGGGACGAAAGCTGGGGGAGCAAACCGGATTAGAAACCCCTTGT  
AGTCC

>Otu170

CCAGCCTACGGGGCGCTGCAGTCGAGAATTTTTCTCAATGGGCGAAAGCTTGAAGGAGCG  
ACGCCGCGTGGGGGATGAAGGGCTTCGGCCTGTAAACCCCTGTCATTTGCGAACAAACCC  
ACTCATCGAATACATGGGTGGCTGATAGTAGTGAAAGAGGAAGGGACGGCTAACTCTGTG  
CCAGCAGCCGCGGTAATACAGAGGTCCCAAGCGTTGTTTCGGATTCACTGGGCGTAAAGGG  
TGCGTAGGTGGCGGGAAAAGTTTGATGTGAAATCTCCGGGCTCAACCCGGAATGGCATT  
GAATACTGTCTCGCTCGAGGGTCGGAGGGGAGACTGGAATTCTCGGTGTAGCAGTGAAAT  
GCGTAGATATCGAGAGGAACACCAGTGGCGAAGGCGAGTCTCTGGACGACTCCTGACACT  
GAGGCACGAAAGCTAGGGGATCAAACAGGATTAGATACCCCTGTAGTCC

>Otu171

CCAGCCTATGGGGGGCAGCAGCTAAGAATCTTCCGCAATGGGGGAAACCCCTGACGGAGCG  
ACGCCGCGTGGATGATGAAGGCCGTAAAGTTGTAAATCCTTTTGTCTGGTGAAGAATAAG  
CCAGGGAGTGGAAGCCCTGGTGTGACGTTAACCGGCGAATAAGCCCCGGCTAATTACG  
TGCCAGCAGCCGCGGTAATACGTATGGGGCAAGCGTTGTTTCGGATTTATTGGGCGTAAAG  
GGCGTGTAGGCGGCTCATCAAGTCTGGTGTGAAATCGCAGGGCTTAACCCCTGCATATGCG  
CTGGAAACTGGTGGGCTTGAGTTCTTGAGGGGAAGCTGGAATTCCAGGTGTAGGGGTGAA  
ATCTGTAGATATCTGGAAGAACACCGGTGGCGAAGGCGAGCTTCTATCAGAGGACTGACG  
CTGAGGCGCGAAAGCGTGGGGAGCAAACAGGATTAGAAACCCCTAGTAGTCC

>Otu172

CCAGCCTACGGGGGGCAGCAGTAAGGAATATTGGTCAATGGACGAAAGTCTGAACCAGCC  
ATGCCGCGTGAAGGATGAAGGCCCTCTGGGTGTAAACTTCTTTTATCTGGGACGAAAAA  
AGGGAATTCTTTCCCACTTGACGGTACCAGAGGAATAAGCACCGGCTAACTCCGTGCCAG  
CAGCCGCGGTAATACGGAGGGTGCAAGCGTTATCCGGATTTACTGGGTTTAAAGGGTGCG  
TAGGTGGGTCTGTAAGTCAGTGGTGAATCTTCGAGCTTAACTCGGAAACTGCCATTGAT  
ACTATAGATCTTGAATTATCTGGAGGTAAAGCGGAATATGTCATGTAGCGGTGAAATGCTT  
AGATATGACATAGAACACCAATTGCGAAGGCAGCTTACTACGGATCGATTGACACTGAGG  
CACGAAAGCGTGGGGATCAAACAGGATTAGAGACCCGTGTAGTCC

>Otu173

CCAGCCTACGGGAGGCTGCAGTGGGGAATTTTGGACAATGGGGGCAACCCTGATCCAGCC  
ATGCCGCGTGAGTGAAGAAGGCCTTCGGGTGTAAAGCTCTTTCGGCGGGGACAAAACCG  
CCACTTTTAATAAAGGTGGTGAATGATGGTACCCGAAGAAGAAGCACCGGCTAACTACGT  
GCCAGCAGCCGCGGTAATACGTAGGGTGCGAGCGTTAATCGGAATTACTGGGCGTAAAGC  
GTGCGCAGGTGGTTTCGTAAGTCAGATGTGAAATCCCCGGGCTTAACCTGGGAATGGCAT  
TTGAGACTGCGAAGCTAGAGTACGGCAGAGGGAGGTGGAATTCCACGTGTAGCAGTGAAA  
TGCGTAGATATGTGGAGGAACACCGATGGCGAAGGCAGCCTCCTGGGCCAGTACTGACGC  
TCATGCACGAAAGCGTGGGGAGCAAACAGGATTAGATACCCCTCGTAGTCC

>Otu174

CCAGCCTACGGGGGGCAGCAGTGAGGAATATTGGTCAATGGACGCAAGTCTGAACCAGCC  
ATGCCGCGTGAAGGATGAAGGCCCTTCTGGGTGTAAACTTCTTTTACCTGGGAAGAAACC  
CCGATTTTCTAATCGGGTTGACGGTACCAGAGGAATAAGCACCGGCTAACTCCGTGCCAG  
CAGCCGCGGTAATACGGAGGGTGCAAGCGTTATCCGGATTTACTGGGTTTAAAGGGTGTG  
TAGGCGGGCTTTTAAGTCAGTGGTGAATCTCCGGGCTCAACCCGGAACCTGCCATTGAT  
ACTATTAGTCTTGAATTCTGTGAGGTAGGCGGAATAAGTCATGTAGCGGTGAAATGCAT  
AGATATGACTTAGAACACCAATTGCGAAGGCAGCTTACTAAGCAGATATTGACGCTGAGG  
CACGAAAGCGTGGGGATCAAACAGGATTAGAAACCCCAGTAGTCC

>Otu175

CCAGCCTATGGGGGGCTCCAGGGACGAATCCTTCGCAATGCGCGCAAGCGTGACGAGGGG  
ACTCCGAGTGGTGGACTTAGTCCACCTTTTTATCAGAATAAACACCTGGTAGAATAAGGG  
CCGGGCAATATCGGTGCCAGCCGCCGCGGTAACACCGAAGGCTCAAGTGGTATCCACGAA  
TATTGGGCTTAAAGAGTCCGTAGCCGGCTTGTTAAGTTCTCTGTGAAATCTTCTGGCTTA  
ACCAGAAGGCGTGACGGGGGTACTGGCAGGCATGGGAGTGGGGGAAGTCAGGAGTACTCA  
CGGGGTAGAGGTAAAATTCTGTAATCCTGTGAGGACTACCAGTGGCGAAGGCGCCTGACT  
AAAACATGTCCGACGGTGAGGGACGAAGGCTAGGAGAACGAATCGGATTAGAAACCCCCG  
TAGTCC

>Otu176

CCAGCCTATGGGTGGCAGCAGTAGGGAATATTGGTAATGGGCGAAAGCCTGAACCAGCAA  
CGCCGCGTGAGCGATGAAGGCCTTCGGGTTGTAAAGCTCTTTTTATGGGGACGAGGAAGG  
ACGGTACCCATAGAATAAGCCTCGGCTAACTACGTGCCAGCAGCCGCGGTAAAACGTAGG  
AGGCAAGCGTTATCCGGATTTACTGGGCGTAAAGCGCATGCAGGCGGTTTGGAAAGTTGG  
ATGTGAAAGCTCCTGGCTTAACTGGGAGAGGTCGTTCAATACTTCCAGACTAGAGGATGT  
GAGAGGAGAGTGGAATTCCGAGTGTAGTGGTGAAATGCGTAGATATTCCGAGGAACACCA  
GTGGCGAAAGCGGCTCTCTGGCACATTTCTGACGCTCATATGCGAAAGCTAGGGTAGCAA  
ACGGGATTAGAAACCCCGTAGTCC

>Otu177

CCAGCCTATGGGGGGCAGCAGTGGGGAATCTTGACACAATGGGGGAAACCCTGATGCAGCG  
ACGCCGCGTGAGCGATGAAGCCCTTCGGGGTGTAAAGCTCTTTCGACAGGAACGATAATG  
ACGGTACCTGTGGAAGAAGCTGCGGCTAACTACGTGCCAGCAGCCGCGGTAATACGTAGG  
CAGCAAGCGTTGTTTCGGAGTTACTGGGCGTAAAGGGTGTGTAGGCGGTTCACTAAGTTTCG  
GTGTGAAATCTCCCGGCTTAACTGGGAGGGTGCATTGAAAACCTGGTGGGCTTGAGTATGG  
GAGAGGTAAGCGGAATTCCTGGTGTAGCGGTGAAATGCGTAGATATCAGGAGGAACACCT  
GTGGTGTAGACAGCTTACTGGACCATCACTGACGCTGAGACACGAAAGCGTGGGTAGCAA  
ACAGGATTAGAAACCCGAGTAGTCC

>Otu178

CCAGCCTATGGGAGGCAGCAGTCAAGAATATTGGTCAATGGACGAAAGTCTGAACCAGCG  
ATGTTGCCGCGTGGAAGAAGGCTTATTGTCTGTAACCGCCGATGCGTGGATCCAGAATGAG  
ATCTCCACGCTACGCAGCCCTGACGAATCTCGGTGCCAGTAGTCACGGTCACGCCGAAAG  
GGCGAGGCATTATATAAGGAAATGGGTGTAAAGCGTCATTAGGTGGATTCAATCAACGCA  
TCTTGAAAAATCGGGGCCTAACCCCTAGAAAAGAGAGGCGCATTGTGAATCTTGAGTGATG  
CCGGGGATCGTCTGAATGTACAGGGGTACCGGTGAAATGGGTCAATCCCTGATGGAAGTCCA  
AAGGCGAAGGCAACGATCTAGGCATTCACTGACGCTGACTGACGAAAGTGCAGGGAGCAA  
AGAGGATTAGAAACCCGCGTAGTCC

>Otu179

CCAGCCTATGGGTTGCACCAGTCGAGAATCTTCCACAATGGACGAAAGTCTGATGGAGCG  
ACGCCGCGTGATTGATGAAGTCCCTCTGGGACGTAAAGATCTTTTATGAGGGAAGAAGTT  
TATTGACTGTACCTCATGAATAAGAGGCTCCTAATCTCGTGCCAGCAGGAGCGGTAATAC  
GAGAGCCTCGAGCGTTATCCGGAATTATTGGGCGTAAAGGGTGCGTAGGTTGTTCTGTTA  
GTCTTTTGTCAAAGCCCCGAGCTTAACTTGGGATATGCGAAAGAAACGGCAGAACTTGAA  
AGTGCGAGAGGTGTACGGAATCATGGTGTAGGGGTGAAATCCGTTGATATCATGGGGAA  
CACCAAATGCGAAGGCAGTACACTGGCGCATATTTGACACTGAAGCACGAAAGCGTGGGT  
AGCGAATGGGATTAGAAACCCGCGTAGTCC

>Otu180

CCAGCCTATGGGGGGCAGCAGTGGGGAATATTGCGCAATGGGCGAAAGCCTGACGCAGCG  
ACGCCGCGTGAGGGGATGAAGGCCTTCGGGTGTAAACCCCTTTCAGCAGGGACGAAGCGA  
AAGTGACGGTACCTGCAGAAGAAGCGCCGGCTAACTACGTGCCAGCAGCCGCGGTAACAC  
GTAGGGCGCAAGCGTTGTCCGGAATTATTGGGCGTAAAGAGCTCGTAGGCGGTCTGTTGC  
GTCCGCTGTGAAAACCTCGGGGCTTAAACCCGAGCCTGCAGTGGATACGGGCAGACTAGAG  
GTAGGTAGGGGAGAATGGAATTCCTGGTGTAGCGGTGAAATGCGCAGATATCGGGAGGAA  
CACCGGTGGCGAAGGCGGTTCTCTGGGCCTTACCTGACGCTGAGGAGCGAAAGCGTGGGG  
AGCAAACAGGATTAGAAACCCCTAGTAGTCC

>Otu181

CCAGCCTATGGGGGGCAGCAGTGGGGAATTTTCCGCAATGGGCGAAAGCCTGACGGAGCA  
ATACCGCGTGAGGGAGGAAGGCTCTTGGGTGTAAACCTCTTTTCTTAGGGAATAAAAAA  
ATGAAGGTACCTAAGGAATAAGCATCGGCTAACTCCGTGCCAGCAGCCGCGGTAATACGG  
AGGATGCAAGCGTTATCCGGAATGATTGGGCGTAAAGCGTCCGCAGGTGGCGATGTAAGT  
CTGCTGTTAAAGAGTTTGGCTTAAACAAATAAAGGCAGTGGAACCTACATGGCTAGAGTG  
CGTTCGGGGCAGAGGGAATTCTTGGTGTAGCGGTGAAATGCGTAGAGATCAGGAAGAACA  
CCGGTGGCGAAAGCGCTCTGCTAGGCCGCAACTGACACTGAGGGACGAAAGCTAGGGGAG  
CGAATGGGATTAGATACCCAGTAGTCC

>Otu182

CCAGCCTACGGGGTGCACCAGTCAAGAACTTCCACAATGGACGAAAGTCTGATGGAGCG  
ACGCCGCGTGAGTTGATGAAGTCCCTTCGGGACGTAAAAACCTTTTATGAGGGAGAAAGTAA  
TTGATGTTACCTCATGAATAAGGGGCTCCTAACTCTGTGCCAGCAGGAGCGGTAATACAG

AGGCCCCAAGCATTATCCGGAATCACTGGGCGTAAAGGGTGTGTAGGCGGTCGTGTTAGT  
CTTTCGTGAAAGATCCTGGGCTCAACCCAAGAGACGCGGAGGAAACGGCACGACTCAGAG  
GACGTAAGAGGTAAAGGGAACATCATGGTGTAGGGGTGAAATCCGTTGATATCATGGGGAA  
CACCAAATGCGAAGGCACCTTACTGGTACGCTCCTGACGCTGAAACACGAAAGCGTGGGA  
ATCGAACGGGATTAGAGACCCGAGTAGTCC

>Otu183

CCAGCCTACGGGGGGCTCCAGTGGGGAATCTTGGACAATGGGGGCAACCCTGATCCAGCC  
ATGCCGCGTGAGTGATGAAGGCCTTCGGGTGTAAACTCTTTCGACGGGGACGATAATG  
ACGGTACCCGTAGAAGAAGCTCCGGCTAACTTCGTGCCAGCAGCCGCGGTAATACGAAGG  
GGGCTAGCGTTGTTTCGGAATTACTGGGCGTAAAGCGCGCGCAGGCGGCTTCTCAAGTCAG  
GGGTGAAAGCCCAGAGCTCAACTCTGGAAGTCCCTTGAAACTGTGGAGCTTGAGTACGG  
TAGAGGTGAGTGGAATTCAGTGTAGAGGTGAAATTCGTAGATATTGGGAAGAACACCG  
GTGGCGAAGGCGGCTCACTGGACCGTTTCTGACGCTCAGGCGCGACAGCGTGGGGATCAA  
ACAGGATTAGAAACCCCCGTAGTCC

>Otu184

CCAGCCTACGGGGTGCAGCAGTCGAGAATTTTTTCACAATGGACGAAAGTCTGATGGAGCG  
ACGCCGCGTGAGGATGAAGGTTTTTCGATTGTAAACTCCTGTCACTGCAGAACAAGGAT  
GCGTTTTATGAATAGTAGATGCATTTGATGGTATGCGGAGAGGAAGGGACGGCTAACTCTG  
TGCCAGCAGCCGCGGTAAGACAGAGGTCCCGAGCGTTGTTTCGATTTCATTGGGCGTAAAG  
GGTGTGTAGGAGGTCCGGTAAGTCAGGTGTGAAATCTCACAGCTTAACTGTGAAACTGCG  
CTTGATACTGCCCGGCTAGAGGATCGGAGGGGGTAACGGAATTTATGGTGTAGCAGTGAA  
ATGCGTAGATATCATAAGGAACACCGGTGGCGAAGGCGGTTACCTGGAAGATTCTTGACT  
CTGAAACACGAAAGCCAGGGGAGCAAACGGGATTAGATAACCCCGTAGTCC

>Otu185

CCAGCCTATGGGGGGCAGCAGTAGGGAATATTGGTTAATCTGCGAAAGCGGGAACCAGCA  
ACGCCGCGTGTCGATGAAGGCCTTCGGGTGTAAAGCACTTTTTGGAGGGATGAGGAAG  
GACAGTACCTCCAGAATAAGCCTCGGCTAACTACGTGCCAGCAGCCGCGGTAACACGTAG  
GAGGCAAGCGTTATTCGATTACTGGGCGTAAAGCGTGTGCAGGCGGTTTCAGAAAGTTG  
GATGTGAAAGCTCCTGGCTTAACTGGGAGAGGTTCGTTCAATACTTCTGGACTAGAGGATG  
AGAGAGGGAGGTGGAATTCCGGGTGTAGTGGTGAATGCGTAGATATCCGGAGGAACACC  
AGTGGCGAAAGCGGCCTCCTGGCTCATTTCTGACGCTCATACACGAAAGCTAGGGTAGCA  
AACGGGATTAGAAACCCAGTAGTCC

>Otu186

CCAGCCTATGGGGGGCAGCAGTGGGGAATATTGCGCAATGGGCGAAAGCCTGACGCAGCG  
ACGCCGCGTGGGTGATGAAGGCCTTCGGGTGTAACACCCTGTCGGGTGGAACGAATCTC  
CATCTCGCTAATACCGAAATGGATTGACGGTACCACCGAAGGAAGCCCCGGCTAACTACG  
TGCCAGCAGCCGCGGTAATACGTAGGGGGCGAGCGTTGTTTCGATTACTGGGCGTAAAG  
AGCGCGTAGGTGGTTCGATCAGTCAGAGGTGAAATCCCTCGGCTCAACCGAGGACCCGCG  
TCTGATACTGTGCAACTTGAGTGCAGGAGAGGAGAGCGGAATTCCGAGTGTAGCGGTGAA  
ATGCGTAGATATTCGAGGAACACCGGTGGCGAAGGCGGCTCTCTGGACTGTCACTGACA  
CTGAGGCGCGAAAGCTAGGGGAGCAAACGGGATTAGATAACCCGCGTAGTCC

>Otu187

CCAGCCTATGGGGGGCAGCAGTCGAGAATATTGCACAATGGGCGAAAGCCTGATCGAGCG  
ACACCGCGTGACAGGATGAAGGCCCTCGGGTCGTAAACTGCGGTAGTATGATAAGAATGCA  
AATGACTGTCATACGGAAGAGGTGGGTAACTACGTGCCAGCACCAGCGGTAATACGTAG  
ACCTCAAGCATTATCCGGATTTATTGGGCGTAAAGCGCACGTAGGAGGTTTTGCGCGTCT  
TTTGTTAAAGCCACCGCCTAACGGTGAAGTGCAGGAGATACGGCAGAACTAGAGGGGG  
TTAGAGGTGCATGGAATCACGGTGTAGGGGTGAAATCCGTTGATATCGTGGGGAACACC  
AAAGGCGAAGGCAGTGCCTGGGACCTTCTGACTCTGAGTTGCGAAAGCGTGGGGAGCA  
AAAAGGATTAGATAACCTCGTAGTCC

>Otu188

CCAGCCTACGGGATGCAGCAGTGGGGAATCTTGCACAATGGGGGCAACCCTGATGCAGCG  
ACGCCGCGTGAACGATGAAGCCCTTCGGGGTGTAAAGTTCTTTCGGCAGGGAAGAATCAT  
GACGGTACCTGCAGAAGCAGCTGCGGCTAACTACGTGCCAGCAGCCGCGGTAATACGTAG  
GCAGCGAGCGTTGTTTCGAGTTACTGGGCGTAAAGGGTGTGTAGGCGGTTCTCTAAGTTT  
GGTGTGAAATCTCCCGGCTTAACCGGGAGGGTGCGCCGAAAACCTGGGGAACCTAGAGTGCG  
GGAGGGGAGAGTGGAATTCCTGGTGTAGCGGTGAAATGCGTAGATATCAGGAGGAACACC  
GGTGGTGTAGACGGCTCTCTGGACCGTAACTGACGCTGAGACACGAAAGCGTGGGTAGCA

AACAGGATTAGAAACCCTCGTAGTCC

>Otu189

CCAGCCTACGGGGGGCAGCAGTGAGGAATATTGCGCAATGGCCGAAAGGCTGACGCAGCG  
ACGCCGCGTGAAGGATGAAGTCCGTTAGGATGTAACTTCTTTTGCAGGGGATGAATGTG  
GTGCCTTCGGGTGCCATTGACCGTACCCTGCGAATAAGGATCGGCTAACTACGTGCCAGC  
AGCCGCGTAATACGTAGGATCCGAGCGTTGTCCGGAATTACTGGGTGTAAAGGGCGTGT  
AGGTGGAACCTTTAAGTCGGTGGTGAAAGCCTGCAGCTTAAGTGCAGAACTGCCCTCGATA  
CTGAAGTTCTTGAGTACGGCAGAGGGAGATGGAATTCATGGTGTAGCGGTGAAATGTGTA  
GATATCATGAAGAACCCGGTAGCGAAGGCGGTCTCCTGGTCCGTAAGTACACTGAGGC  
GCGAAAGCGTGGGGAGCAAACAGGATTAGAAACCCCCGTAGTCC

>Otu190

CCAGCCTACGGGGGGCAGCAGTGGGGAATTTTGGACAATGGGGGCAACCCTGATCCAGCC  
ATGCCGCGTGTGTGAAGAAGGCCTTCGGGTGTAAAGCACTTTTGTCCGGAACGAAACGG  
CGGATGCTAATAACATCCGTTAATGACGGTACCGGAAGAATAAGCACCGGCTAACTACGT  
GCCAGCAGCCGCGTAATACGTAGGGTGCAAGCGTTAATCGGAATTACTGGGCGTAAAGC  
GTGCGCAGGCGGTTTTCGCAAGTCAGATGTGAAATCCCCGGGCTTAACCTGGGAAGTGCAT  
TTGAAACTACGAGGCTAGAGTGTGTGAGAGGGGGGTAGAATTCCACGTGTAGCAGTGAAA  
TGCGTAGAGATGTGGAGGAATACCGATGGCGAAGGCAGCCCCCTGGGATAACACTGACGC  
TCATGCACGAAAGCGTGGGGAGCAAACAGGATTAGATAACCCTAGTAGTCC

>Otu191

CCAGCCTACGGGTGGCAGCAGCTAAGAATCTTCCGCAATGGGGGAAACCCTGACGGAGCG  
ACGCCGCGTGGATGATGAAGGCCGTAAGGTGTAAATCCTTTTGTGCGGTGAAGAATAAG  
GGTGGGAGTGGAAAGCCCATCTGATGACGTTAGCCGGCGAATAAGCCCCGGCCAATTACG  
TGCCAGCAGCCGCGTAATACGTATGGGGCAAGCGTTGTTCGGAGTTATTGGGCGTAAAG  
GGCGTGTAGGCGGCTCATCAAGTCTGGTGTGAAATCGTCAGGCTCAACCTGACATATGCG  
CTGGAAGTGGTGGGCTTGAGTTCTTGAGGGGAAGCTGGAATTCCAGGTGTAGGGGTGAA  
ATCTGTAGATATCTGGAAGAACCCGGTGGCGAAGGCGAGCTTCTATCAGAGGACTGACG  
CTGAGGCGCGAAAGCGTGGGGAGCAAACAGGATTAGAAACCCTAGTAGTCC

>Otu192

CCAGCCTATGGGTGGCAGCAGTGGGGAATATTGGACAATGGGGGAAACCCTGATCCAGCG  
ACGCCGCGTGTGTGAAGAAGGCCTGCGGGTTGTAAAGCACTTTTAGTGGGGATGAAAAGT  
CCAGGGCTAATACCCTTGATCTTGACCTAACCCAAAGAAAAAGCACCGGCTAACTCTGT  
GCCAGCAGCCGCGTAATACAGAGGGTGCGAGCGTTAATCGGAATTACTGGGCGTAAAGC  
GTGCGTAGACGTTTTCGTAAGTCGGGTGTGAAATCCCCGGGCTCAACCTGGGAATTGCAT  
TCGAGACTGCGAGGCTAGGGTGCGGAAGAGGGAAGCGGAATTTCCGGTGTAGCGGTGAAA  
TGCGTAGATATCGGAAGGAACATCAGTGGCGAAGGCGGCTTCCTGGTCCAGCACCGACGT  
TCAGGCACGAAAGCGTGGGGAGCAAACAGGATTAGATAACCCTAGTAGTCC

>Otu193

CCAGCCTACGGGACGCAGCAGTGGGGAATCTTGGACAATGGGCGAAAGCTTGATCCGGTG  
ATATTAAATGGAGGAATTAAGACAGCCAAAATGCTGTAACTTCTATGCGTTAGATTGAA  
ATAATTATGAAAAGAGGAGTCTTAAACGAAGCCCTGGCTAACTCGTGCCAGCAGCCGCGG  
TAACACGAGTGGGGCGAGCGTTATTAGTATTATTAGGCGTAAAAGGTTTCGTAGATGGTC  
TGATTATGTTGAAAAAGAAATCCTAAAGCCTAACTTTAGAAAAATTTTTCAATTTAAGTT  
TGACTAAGAGTCTAAACGGGATAATAGAATTTCTTAACGAGGAGTAAAGTCCGAAGATCT  
AGGAAGGAACACCATAAGTGAAAACATTTATCTAGTTTAGTCTGACATTGAGGAACGAAA  
GCATGGGGATCAAAAAGGATTAGAAACCCCCGTAGTCC

>Otu194

CCAGCCTACGGGGGGCACCAGTTTCGAATCATTCACAATGGGCGAAAGCCTGATGGTGCG  
ACGCCGCGTGGGGGATGAAGGTCTTCGGATTGTAAACCCCTGTCACCTGGGACTAAACTC  
CGGCGAAGAGCCGACTGAATTAACCAGGAGAGGAAGCAGTGGCAAACCTCTGTGCCAGCA  
GCCGCGTAATACAGAGACTGCAAGCGTTACTCGGATTCACTGGGCGTAAAGGGAGCGCA  
GGTGGGCTGGTGTGTCGGGCGTGAAATCCCCGGGCTTAACCTCCGGAACGGCGCCCGAAAC  
TACCGGCCTAGAGGATTGGAGAGGCGGGTGGAATTCAGGTGTAGCGGTGAAATGCGTAG  
ATATCTGGAGGAACACCGACGGCGAAGGCAGCCCGCTGGACAAATCCTGACACTCAGGCT  
CGAAAGTATGGGGAGCAAAAGGGATTAGATAACCCGTGTAGTCC

>Otu195

CCAGCCTACGGGGGGCAGCAGTGGGGAATATTGGACAATGGGCGCAAGCCTGATCCAGCA  
ATGCCGCGTGTGTGAAGAAGGTCTTCGGATTGTAAAGCACTTTCGGCGGGGACGATGATG

ACGGTACCCGCAGAAGAAGCCCCGGCTAACTTCGTGCCAGCAGCCGCGGTAATACGAAGG  
GGGCTAGCGTTGCTCGGAATGACTGGGCGTAAAGGGCGCGTAGGCGGTTTGTTCAGTCA  
GCGTGAAATTCTGGGCTTAACCTGGGGGCTGCGCTTGATACAGGCAGACTTGAGTGTGG  
AAGAGGGTCGTGGAATTCACAGTGTAGAGGTGAAATTCGTAGATATTGGGAAGAACACCG  
GTGGCGAAGGCGGCGACCTGGTCCATTACTGACGCTGAGGCGCGAAAGCGTGGGGAGCAA  
ACAGGATTAGAAACCCTCGTAGTCC

>Otu196

CCAGCCTACGGGGGGCAGCAGTCAGGAATATTGCGCAATGGAGGAACTCTGACGCAGCG  
ACGCCGCGTGGGTGATGAAGGCCTTCGGGTCGTAAAGCCCTGTCGGAGGGGAAGAAAAGC  
TTGGTGGCTAATATCCACCAGGCCCTTGACGGTACCCTCAAAGGAAGCACCGGCTAACTC  
CGTGCCAGCAGCCGCGGTAAGACGGAGGGTGCAAGCGTTGTTTCGGATTGACTGGGCGTAA  
AGGGCGTGTAGGCGGTTGCCCAAGTCCGATGTGAAAGCCCGAGGCCTACCCTCGGAAGTG  
CATCGGAAACTAGGCAGCTGGAGCGCGATAGAGGAGGGTAGAATTCCTGGTGTAGCGGTG  
AAATGCGTAGATATCAGGAGGAATACCGGCGGCGAAGGCGGCCCTCTGGATCGTTGCTGA  
CGCTGAGACGCGAAAGCGTGGGGAGCAAACAGGATTAGAAACCCCCGTAGTCC

>Otu197

CCAGCCTACGGGGTGCAGCAGTCGAGAATTTTTTCAATGGGGGAAACCCTGATGGAGCG  
ACGCCGCGTGGGGGATGAATGGCTTCGGCCCGTAAACCCCTGTCATTTGCGAACAAATCC  
GCACACCCAACACGTGTGTGGTTGATAGTAGCGGAAGAGGAAGGGACGGCTAACTCTGTG  
CCAGCAGCCGCGGTAATACAGAGGTCCCAAGCGTTGTTTCGGATTCACTGGGCGTAAAGGG  
TGCGTAGGTGGCCGGGTAAGTCTGATGTGAAATCTCGGAGCTCAACTCCGAAACGGCATT  
GGATACTCTCCGGCTGGAGGGTTCGGAGGGGGGACTGGAATTCCTCGGTGTAGCAGTGAAAT  
GCGTAGATATCGAGAGGAACACCAGTGGCGAAGGCGAGTCCCTGGACGACTCCTGACACT  
GAGGCACGAAAGCTAGGGGAGCAAACAGGATTAGAAACCCGAGTAGTCC

>Otu198

CCAGCCTATGGGGGGCAGCAGTAGGGAATCTTGCGCAATGCGCGAAAGCGTGACGCAGCA  
ACGCCGCGTGGGGGAAGAAGGCCTTCGGGTTGTAAACCCCTTTCAGTTGGGACGAAGCTT  
CGTCGGTTAATAGCCGACTGGAGTGACGGTACCTTCACAAGAAGCACCGGCTAACTACGT  
GCCAGCAGCCGCGGTAATACGTAGGGTGCAAGCGTTGTCCGGAATTATTGGGCGTAAAGA  
GCGTGTAGGCGGTCCGATCAGTCCGCTGTGAAAGTCCAGGGCTCAACCCTGGGATGCCGG  
TGGATACTGTGCGACTAGAGTCCGGAAGAGGCGAGTGGAATTCCTGGTGTAGCGGTGAAA  
TGCGCAGATATCAGGAGGAACACCAATGGCGAAGGCAGCTCGCTGGGACGGTACTGACGC  
TGAGACGCGAAAGCGTGGGGAGCAAACAGGATTAGAAACCCCTGTAGTCC

>Otu199

CCAGCCTACGGGGGGCTGCAGTCGAGAATATTCGACAATGGGCGAAAGCCTGATCGAGCG  
ACACCGCGTGCAGGATGAAGGCCCTTCGGGTCGTAAACTGCGGTAGTATGGGAAGAATGTA  
AATGACCGTACCATACGGAAGAGGTGGGTAACCTACGTGCCAGCACCAGCGGTAATACGT  
AGACCTCAAGCGTTATCCGGATTTATTGGGCGTAAAGCGCATGTAGGAGGTTTTGCGCGT  
CTTTTGTAAAGCCCACCGCCCAACGGTGGAGATGCAGGAGATACGGCAGGACTAGAGGA  
GGTTAGAGGTGCATGGAACCTACGGTGTAGGGGTGAAATCCGTTGATATCGTGGGGAACA  
CCAAAGGCGAAGGCAGTGCACTGGGACCTTCCTGACTCTGAGATGCGAAAGCGTGGGGAG  
CAAAAAGGATTAGATACCCTAGTAGTCC

>Otu200

CCAGCCTACGGGTTGCTGCAGTAAGGGATATTGCGCAATGGGCGAAAGCCTGACGCAGCA  
ACGCCGCGTGGAGGATGAAGGCCTTCGGGTCGTAAACTCGTTTTGCCTGTGACGAGCAAG  
GACGGTAGCAGGCGAATAAGTACGGCTAACTACGTGCCAGCAGCCGCGGTAAAACGTAG  
GTGGCGAGCGTTATCCGGATTTACTGGGCGTAAAGGGTGTGACGGCGGGCGACCAAGTGG  
TGTATGAAATCTCCGGGCCTAAGTCGGAGGGGTATGCCAGACTGGTCGTCTTGAGCGTG  
AGAGAGGGACATGGAATTCGGGTGTAGTGGTGAATGCGTAGAGATCCGGAGGAACCCC  
AGAGGCGAAGGCGGTGTCTGGCTCACGGCTGACGCTCAGCCACGACAGCATGGGGAGCG  
AACGGGATTAGATACCCTAGTAGTCC

>Otu201

CCAGCCTATGGGTTGCACCAGGCGCGAAAACTTTGCAATGCGAGAAATCGTGACAAGGGA  
ACTCCGAGTGCCCGTAAATTCGGGCTGTCCATCTGTGTAAAAAACAGGTGAAGAAAGGGC  
CGGGCAAGACCGGTGCCAGCCGCCGCGGTAATACCGGCGGCTCGAGTGGTGGCCACTATT  
ACTGGGCTTAAAGCGTCCGTAGCTGGTCTGTAAAGTCTCTGGGGAAATCTTCCGGCTTAA  
CCGGAAGGCGTCCCAGGGATACTGGCAGACTAGGGACCGGGAGAGGTGAGAGGTACTCCA  
GGGTAGGAGTGAAATCCTGTAATCCTTGGGGGACCACCTGTGGCGAAGGCGTCTCACCA

GAACGGCTCCGACAGTGAGGGACGAAAGCTGGGGGAGCAAACCGGATTAGAAACCCCCGT  
AGTCC  
>Otu202  
CCAGCCTATGGGGGGCTGCAGTGGGGAATCTTCCGCAATGGACGAAAGTCTGACGGAGCA  
ACGCCGCGTGAGTGAAGAAGGTTTTTCGGATCGTAAACTCTGTTTTTCAGGGACGAATGTG  
CGTCGTGTAAATAATGCGATGTAATGACGGTACCTGAGTAGAAAGCCACGGCTAACTACG  
TGCCAGCAGCCGCGGTAATACGTAGGTGGCAAGCGTTGTCCGGAATTATTGGGCGTAAAG  
CGCGCGCAGGTGGGATATTAAGTCTGGTGTAAAGTTCGGGGCTCAACCCCGTGAAGCAT  
TTGGAACTGATATTCTTGAGTGCAGGAGAGGAAAGTGGAATTCCTAGTGTAGCGGTGAA  
ATGCGTAGATATTAGGAGGAACACCAGTGGCGAAGGCGACTTTCTGGACTGTGTCTGACA  
CTGAGGCGCGAAAGCCAGGGTAGTGAACGGGATTAGATAACCCAGTAGTCC  
>Otu203  
CCAGCCTATGGGGGGCAGCAGTGGGGAATTTTGC GCAATGGGCGAAAGCCTGACGCAGCA  
ACGCCGCGTGGGTGATGAAGGTCTTCGGACTGTAAACCCCTGTCGTCAGGGACGAAGGTG  
CGCATGTTAATAACGTGTGTACTTGACGGTACCTGGAGAGGAAGCCCCGGCTAACTCTGT  
GCCAGCAGCCGCGGTAATACAGAGGGGGCAAGCGTTATTTCGGAATTATTGGGCGTAAAGG  
GCGCGTAGGCGGTTTTTTAAGTCAGATGTGTAATCCCCGAGCTTAACTTGGGAAGTGCAT  
CTGAGACTGGAAGGCTAGAGTACTGGAGAGGGTGGTGGAATTCCTCGTGTAGCGGTGAAA  
TGCGTAGAGATGAGGAGGAACACCAGTGGCGAAGGCGGCCACCTGGACAGTAACTGACGC  
TGAGGCGCGAAAGTGTGGGTAGCAAACAGGATTAGAAACCCAGTAGTCC  
>Otu204  
CCAGCCTATGGGGGGCAGCAGTGGGGAATCTTGC GCAATGGACGAAAGTCTGACGCAGCA  
ACGCCGCGTGAGGGACGAAGGTTTTCTGAATTGTAAACCTCTTTCGACAGGGACGATAAT  
GACGGTACCTGTAGAAGAAGCACCGGCCAACTATGTGCCAGCAGCCGCGGTGATACATAG  
GGTGCGAGCGTTATTCGGATTATTGGGCGTAAAGAGCTCGTAGGCGGTTCGATAAGTCG  
GGTGTTAAATCCACAGGCTCAACCTGTGGCAGCCATCCGAAACTGTCTGTGACTAGAGTTT  
GGTAGGGGATCACGGAATTCCTGGTGTAGCGGTGGAATGCGCAGATATCAGGAGGAACAC  
CAGCAGCGAAGGCGGTGATCTGGGCCAATACTGACGCTGAGGAGCGAAAGCGTGGGGAGC  
GAACAGGATTAGAAACCCGCGTAGTCC  
>Otu205  
CCAGCCTATGGGTTGCAGCAGTTTCGAATCATTCACAATGGGGGAAACCCTGATGGTGCG  
ACGCCGCGTGAGGGATGAAGGTCTTCGGATTGTAAACCCCTGTCACCTGGGACTAAACCT  
CGGCGAAGAGCCGAGCTGAATTAACCAGGAGAGGAAGCAGTGGCTAACTCTGTGCCAGCA  
GCCGCGGTGATACAGAGACTGCAAGCGTTACTCGGATTCACTGGGCGTAAAGGGAGCGCA  
GGTGGGCAGGTGTGTGCGGTGTGAAATCCCGGGGCTTAACCCCGGAATGGCGCCCCGAAAC  
TATCTGTCTAGAGGATTGGAGAGGCGGGTGGAATTCAGGTGTAGCGGTGAAATGCGTAG  
ATATCTGGAGGAACACCGACGGCGAAGGCAGCCGCTGGACAAATCCTGACACTCAGGCT  
CGAAAGTATGGGGAGCAAAGGGATTAGAAACCCTAGTAGTCC  
>Otu206  
CCAGCCTACGGGGCGCAGCAGTGGGGAATCTTGCAATGGGCGAAAGCCTGATGCAGCG  
ACGCCGCGTGAGCGATGAAGCCCTTCGGGGTGTAAGCTCTTTCGACGGGAACGATAATG  
ACGGTACCCGGAGAAGAAGCTGCGGCTAACTACGTGCCAGCAGCCGCGGTAATACGTAGG  
CAGCGAGCGTTGTTTCGGAATTACTGGGCGTAAAGAGTGTGTAGGCGGTGTTCCAGTCTG  
TTGTGAAATCTCCCGGCTTAACTGGGAGGGTGCAGCGGAAACTAGAATGCTAGAGGGTGG  
GAGAGGTAAGCGGAATTCCTGGTGTAGCGGTGAAATGCGTAGATATCAGGAGGAACACCT  
GTGGTGTAGACAGCTTACTGGACCACTTCTGACGCTGAGACACGAAAGCGTGGGTAGCAA  
ACAGGATTAGAAACCCCTGTAGTCC  
>Otu207  
CCAGCCTACGGGAGGCAGCAGTGAAGGAATATTGGGCAATGGGCGCAAGCCTGACCCAGCC  
ATGCCGCGTGAAAGGATGAATGCCCTATGGGTTGTAAACTCTTTTGTACGGGACGAAACT  
CCTGGTCGTGACCGGGATTGACTGTACCGTGCGAATAAGCATCGGCTAACTCCGTGCCAG  
CAGCCGCGGTAATACGGAGGATGCAAGCGTTATCCGGATTCATTGGGTTTAAAGGGTGCG  
TAGGCGGAATAATAAGTCAGTGGTGAAAGCCTGCGGCTTAACCGTAGAAATGCCATTGAT  
ACTGTTATTCTTGAGTATAGTTGAGGTGGGCGGAATGTGTAATGTAGCGGTGAAATGCTT  
AGATATTACACAGAACACCAATTGCGAAGGCAGCTCACTAAGCTGTTACTGACGCTGAGG  
CACGAAAGCGTGGGGAGCAAACAGGATTAGATAACCCAGTAGTCC  
>Otu208  
CCAGCCTACGGGGGGCAGCAGTGGGGAATATTGGACAATGGGCGCAAGCCTGATCCAGCA

ATGCCGCGTGGGTGAAGAAGGTTTTTCGGATTGTAAAGCCCTTTTGGCGGGGACGATGATG  
ACGGTACCCGCAGAATAAGCCCCGGCTAACTTCGTGCCAGCAGCCGCGGTAATACGAAGG  
GGGCTAGCGTTGCTCGGAATGACTGGGCGTAAAGGGCGCGTAGGTGGCGATCAAAGTCAG  
GCGTGAAATTCTGGGCTCAACCTGGGGGCTGCGTTTGATACTTGGTTGCTAGAGTGAGG  
AAGAGGGTCGTGGAATTCACAGTGTAGAGGTGAAATTCGTAGATATTGGGAAGAACACCG  
GTGGCGAAGGCGGCGACCTGGTCCTTGACTGACGCTGAGGCGCGAAAGCGTGGGGAGCAA  
ACAGGATTAGATACCCCCGTAGTCC

>Otu209

CCAGCCTATGGGAGGCAGCAGTCGAGAATTTTTCTCAATGGGCGAAAGCCTGAAGGAGCG  
ACGCCGCGTGGGGGATGAAGGGCTTCGGCCCGTAAACCCCTGTCATTTGCGAACAAACCT  
TATGGTATAATACATCATGAGCTGATTGTAGCGAAAGAGGAAGGGACGGCTAACTCTGTG  
CCAGCAGCCGCGGTAATACAGAGGTCCCAAGCGTTGTTTCGGATTCACTGGGCGTAAAGGG  
TGCGTAGGTGGCGGGGTAAGTTTGATGTGAAATCTCCGGGCTTAACCCGGAACCTGCATT  
GAATACTATTCTGCTCGAGGGTTGGAAGGGGGACTGGAATACTTGGTGTAGCAGTGAAAT  
GCGTAGATATCAAGTGGAACACCAGTGGCGAAGGCGAGTCCCTGGACAACCTCCTGACACT  
GAGGCACGAAAGCTAGGGGAGCAAACAGGATTAGATACCCCCGTAGTCC

>Otu210

CCAGCCTATGGGGGGCTGCAGTGGGGAATCTTGCGCAATGGGCGAAAGCCTGACGCAGCC  
ATGCCGCGTGGATGATGAAGGTCTTAGGATTGTAAATCCTTTCAGCGGGGACGATAATG  
ACGGTACCCGCAGAAGAAGCCCCGGCTAACTTCGTGCCAGCAGCCGCGGTAATACGAAGG  
GGGCTAGCGTTGCTCGGAATTACTGGGCGTAAAGGGCGCGTAGGCGGACAGTTAAGTCGG  
GGGTGAAAGCCCCGGGGCTCAACCTCGGAATTGCCTTCGATACTGGCTGTCTTGAGTACGG  
GAGAGGTGTGTGGAACCTCCGAGTGTAGAGGTGAAATTCGTAGATATTTCGGAAGAACACCA  
GTGGCGAAGGCGACACACTGGCCCGTTACTGACGCTGAGGCGCGAAAGCGTGGGGAGCAA  
ACAGGATTAGAAACCCGCGTAGTCC

>Otu211

CCAGCCTATGGGGGGCACCAGTAAGGAATATTGGACAATGGAGGCAACTCTGATCCAGCC  
ATGCCGCGTGCAGGAAGAAGGCGCTACGCGTTGTAAACTGCTTTTGTACCAGAGAAAATC  
ATTGTACGTGTACGATGTTGATAGTATGGTAAGAATAAGCATCGGCTAACTTCGTGCCAG  
CAGCCGCGGTAATACGAAGGATGCAAGCGTTATCCGGATTTATTGGGTTTAAAGGGAGCG  
TAGGCGGTCTTATAAGTCAGTGGTGAAATCTCGTTGCTTAACAACGAACGTGCCATTGAT  
ACTGTAGGACTTGAGTACAGTTGCCGTTGGCGGAATGTGTGCATGTAGCGGTGAAATGCAT  
AGATATGACACAGAACACCGATTGCGAAGGCAGCTGACGAAACTGTAACTGACGCTGAGG  
CTCGAAAGCGTGGGGATCAAACAGGATTAGAGACCCCCGTAGTCC

>Otu212

CCAGCCTATGGGGGGCAGCAGCTAAGAATCTTCCGCAATGGGGGAAACCCTGACGGAGCG  
ACGCCGCGTGGATGATGAAGGCCGTAAGGTTGTAAATCCTTTTGTGGTGAAGAATAAG  
TGGAGGAGTGGAAGCCTCCATGATGACGTTAACCGACGAATAAGCCCCGGCTAATTACG  
TGCCAGCAGCCGCGGTAATACGTATGGGGCAAGCGTTGTTTCGGAGTTATTGGGCGTAAAG  
GGCGTGTAGGCGGCTCATGAAGTCTGGTGTGAAATCGACAGGCTCAACCTGTCATATGCG  
CTGGAACCTGGTGGGCTTGAGTTCTTGAGGGGAAGCTGGAATTCCAGGTGTAGGGGTGAA  
ATCTGTAGATATCTGGAAGAACACCGGTGGCGAAGGCGAGCTTCTATCAGAGGACTGACG  
CTGAGGCGCGAAAGCGTGGGGAGCAAACAGGATTAGATACCCGAGTAGTCC

>Otu213

CCAGCCTACGGGAGGCAGCAGTAGGGAATATTGGGCAATGGGCGAAAGCCTGACCCAGCA  
ACGCCGCGTGCACGATGAAGGTCTTCGGATCGTAAAGTGCTTTTCTGAGAGATGAGAAAG  
GACAGTATCTCAGGAATAAGTCTCGGCTAACTACGTGCCAGCAGCCGCGGTAAACCGTAG  
GAGGCGAGCGTTATCCGATTACTGGGCGTAAAGCGCGTGACAGGTGGTTTGGTAAGTTG  
GATGTGAAAGCTCCCGGCTCAACTGGGAGAGGTCGTTCAATACTACCAGACTTGAGAGCA  
GTAGAGGGAGGTGGAATTCCCGGTGTAGTGGTGAATGCGTAGATATCGGGAGGAACACC  
AGTGGCGAAAGCGGCCTCCTGGACTGTTTCTGACACTCAGACGCGAAAGCTAGGGTAGCA  
AACGGGATTAGATACCCCCGTAGTCC

>Otu214

CCAGCCTATGGGGGGCACCAGTGGGGAATTTTGCGCAATGGGCGAAAGCCTGACGCAGCA  
ACGCCGCGTGAGTGATGAAGGCTTTCGGGTCGTAAAGCTCTGTCAAGGGGAAAGAAATGC  
TTAGCGGTTAATACCCGTTATGCTTGACGGTACCCCTAAAGGAAGCACCGGCTAACTCCG  
TGCCAGCAGCCGCGGTAATACGGAGGGTGCGAGCGTTGTTTCGGAATTATTGGGCGTAAAG  
CGCGTGTAGGCGGTTTGGTAAGTCTGATGTGAAAGCCCTGGGCTCAACCCGGAAGTGCA



TTGGAAACTGTCAGACTTGAATACGGGAGAGGGTAGTGGAATTCCTGGTGTAGGAGTGAA  
ATCCGTAGATATCAGGAGGAACACCGGTGGCGAAGGCGGCTACCTGGACCGATATTGACG  
CTGAGACGCGAAAGCGTGGGTAGCAAACAGGATTAGATACCCAGTAGTCC

>Otu215

CCAGCCTATGGGTGGCAGCAGTGGGGAATATTGGGCAATGGACGCAAGTCTGACCCAGCG  
ACGCCGCGTGCAGGATGAAGGCCTTCGGGTGTAAACCGCTTTCAGCAGGGAAGAAGCGA  
AAGTGACGGTACCTGCAAAAGAAGCACCGGCTAACTATGTGCCAGCAGCCGCGGTAATAC  
ATAGGGTGCAAGCGTTGTCCGGAATTATTGGGCGTAAAGAGCTCGTAGGTGGTTAGTTAC  
GTCGGGTGTGAAAATCTGGGGCTCAACCCCAGACCTGCACTCGATACGGGCTAGCTAGAG  
TTTGGTAGGGGAGACTGGAATTCCTGGTGTAGCGGTGGAATGCGCAGATATCAGGAGGAA  
CACCAATGGCGAAGGCAGGTCTCTGGGCCAATACTGACACTGAGGAGCGAAAGCGCGGG  
AGCGAACAGGATTAGAAACCCCGTAGTCC

>Otu216

CCAGCCTATGGGTTGCAGCAGTAGGGAATATTGCGCAATGGACGAAAGTCTGACGCAGCA  
ACGCCGCGTGATGATGAAGCATTTCGGTGTGTAAATCCTGTCAGTGGGGAAGAAACGC  
ACGGTGAGTAACTGCTCCGTGCTTGACGGTACCCGCAGAGGAAGTCCCGGCTAACTCCGT  
GCCAGCAGCCGCGTAATACGGGGGGACAAGCGTTGTTTCGGATTTACTGGGCGTAAAGG  
GCGCGTAGGCGGACCTTCAAGTCGGATGTGAAACCTGGCGGCTTAACCACCAGCCTGCAT  
TCGATACTGTTGGCCTTGAGTACGGGAGAGGAGAATGGAATTCAGGTGTAGCGGTGAAA  
TGCGTAGATATCTGGAAGAACACAGTAGCGAAGGCGGTCTCTGGACCGATACTGACGC  
TAAAGCGCGAAGGCTTGGGGAGCAAACAGGATTAGATACCTAGTAGTCC

>Otu217

CCAGCCTATGGGGGGCAGCAGTGGGGAATATTGGGCAATGGGCGAAAGCCTGACCCAGCC  
ACGCCGCGTGAGTGATGAAGGCCTTCGGGTCGTAAAGCTCTGTGGGGAGGGACGAACAAG  
TGCGCATCCAATACATGCGTGCCCTGACGGTACCTCCTTAGCAAGCACCGGCTAACCATG  
TGCCAGCAGCCGCGTAATACATGGGGTGCAAACGTTGCTCGGAATTATTGGGCGTAAAG  
CGCGCGTAGGCGGTTACTTAAAGTCGGATGTGAAAGCCCTTGGCTTAACTGAGGAAGTGCA  
TCCGAGACTGAATAGCTAGAGTACGAAAGAGGGTTCGCGGAATTCCCGGTGTAGAGGTGAA  
ATTCGTAGATATCGGGAGGAACACCGGCGGCGAAGGCGGCGACCTGGTTTCGAGACTGACG  
CTGAGGCGCGAAAGCGTGGGGAGCAAACAGGATTAGAAACCCTCGTAGTCC

>Otu218

CCAGCCTACGGGGGGCAGCAGTCGCGAAACCTTGACAATGCGCGAAAGCGTGATCAGGGA  
ACTCTGAGTGCAACCTAACGGTTGACTTTTGATCAGCTTGAAAAGCTGGTAGAATAAGG  
GCTGGGTAAATCTCGTGCCAGCCGCCGCGGTAACACGAGTAGCCCGAGTGGTGCCACGA  
ATATTGAGTCTAAAACGCATGTAGCCGGCTTGGAAGTTCCCCGTGAAATCTCTCGGCTC  
AACCAGAGAGGCGCGCGGGGAATACTAACAGGCTCGGGAATGGAAGAGGCCAAGGGTACTG  
TAAGGGGAGGAGTAAATCCTGTAATCCTTGACAGGACCATCGGTGGCGAAAGCGCTTGGC  
CAAGACATGTCCGACGGTGAGATGCGAAGGCTAGGGGAGCAAATCGGATTAGAGACCCCG  
GTAGTCC

>Otu219

CCAGCCTATGGGGGGCAGCAGCTGGGAATCTTCTGCAATACACGAAAGTGTGACAGAGCG  
AACCAGAGTGTTCTCATTTAGAGAACTTTTGCCAAATCTAAAAAGTTTGCGCAATAAGGA  
CTGGGCAAGACTAGTGCCAGCCGCCGCGGTAATACTAGCTGTCCAAGTCGCAACCATCTT  
TATTGGGTCTAAAACATCCGTAGCTTGCTTAGTAAGTTCTTTGTGAAATCCTGTCTCTCA  
AGGGCAGGGCGTGCAAGGAATACTGCTTCGCTAGAGACTGGAAGACGTAAGAAGTACGTT  
TGAAGTAGCGGTAAATGCGTTAATCTTAGACGGACTCACAACAGCGAAGGCATCTTACG  
AGGACAGATCTGACAGTGAGGGATGAAGGCCAGGGGCGCAAAACGGATTAGAAACCCTAG  
TAGTCC

>Otu220

CCAGCCTACGGGTGGCAGCAGGTAGGAATCTTTTGCAATGCGCGCAAGCGTGACAAAGCG  
AGCCAGAGTGCTTTTCAATTGAAAAGCTTTTGCCAAATCCAAAAAGTTTGCGCAATAAGG  
ACTGGGCAAGACTAGTGCCAGCCGCCGCGGTAATACTAGCGGTCCAAGTCGACGCCATCA  
TTATTGGGTCTAAAATATCCGTAGCTTGCTTAATAAGTTCCCTGTGAAATCTTATATCTT  
AAGTATAAGGCGTGACAGGAATACTGCTAAGCTAGAGACTGGAAGACGTAGAAAGTACGT  
TCAAAGTAGCGGTAAATGTGTTAATCTTGAACGGACTCACAATAGCGAAGGCATTCTAC  
GAGGACAGTTCTGACAGTAAAGGATGAAGGCTAGGGGCGCAAAATGGATTAGATACCCCG  
GTAGTCC

>Otu221

CCAGCCTACGGGAGGCTGCAGTGGGGAATATTGCACAATGGGCGCAAGCCTGATGCAGCG  
ACGCCGCGTGGGGGATGACGGCCTTCGGGTGTAAACCTCTTTCAGCAGGGACGAAGCGC  
AAGTGACGGTACCTGCAGAAGAAGCACCGGCCAACTACGTGCCAGCAGCCGCGGTAATAC  
GTAGGGTGCAGCGTTGTCCGGAATTACTGGGCGTAAAGAGCTCGTAGGTGGTTTGTTCGC  
GTTGTTTCGTGAAAACCGAGGGCTTAACCTCTCGGCGTGCGGGCGATACGGGCAGACTAGAG  
TACTGCAGGGGAGACTGGAATTCCTGGTGTAGCGGTGGAATGCGCAGATATCAGGAGGAA  
CACCGGTGGCGAAGGCGGGTCTCTGGGCAGTAACCTGACGCTGAGGAGCGAAAGCGTGGGG  
AGCGAACAGGATTAGAAACCCAGTAGTCC

>Otu222

CCAGCCTATGGGAGGCTCCAGGCGCGAAACCTTCGCAATGCGCGAAAGCGTGACGAGGTT  
AATCCGAGTGGTTCGCGCTGAGGGAATCTTTTGTGGCTCTAAAATGGCCAGTGAATAAG  
GGGAGGGCAAGTCTGGTGTACGCCGCGCGGTAATACCAGCTCCTCGAGTGGTCGGGGCG  
ATTATTGGGCCTAAAGCATCCGTAGCCTGTTCCGTAGGTCTTCTGTTAAATCCAACGGCT  
TAACCGTTGGCCTGCAGAAGATACCGCGGGACTAGGAGGCGGGAGAGGTGGACGGTACTC  
CACGTGTAGGGGTAAAATCCTTTGATCCGTGGAAGACCACCAGTGGCGAAGGCGGTCCAC  
CAGAACGCGCTCGACGGTGAGGGATGAAAGCTGGGGGAGCGAACC GGATTAGAAACCCGT  
GTAGTCC

>Otu223

CCAGCCTATGGGGGGCAGCAGTAGGGAATTTTACGCAATGGGCGAAAGCCTGACGTAGCG  
ACACCGCGTGAACGAAGAAGCCTTTTGGGGTGTAAGTTCTGTGCGCTGGGAAGAAAAA  
ATGACGGTACCAGCAAAGGAAGCATCGGCTAACTACGTGCCAGCAGCCGCGGTAAGACGT  
AGGATGCAAGCATTTGTCCGGATTTATTGGGCGTAAAGAGTTCGTAGGCGGTTTGTAAAGT  
CTAATGTTAAAGATCAGGGCTCAACCCTGGGACTGCATTGGATACTGGCAGACTGGAGTG  
TGGTAGAGGTAAGTGAATTTCTGGTGTAGCGGTGAAATGCGTAGATATCAGAAAGAACA  
CCAGTGGCGTAGGCGACTTACTGGGCCATAACTGACGCTGAGGAACGAAAGCCAGGGGAG  
CAAATGGGATTAGAAACCCGCGTAGTCC

>Otu224

CCAGCCTATGGGAGGCAGCAGGAGGGAATATTGGTAATGGGCGAAAGCCCGAACCAGCAA  
CGCCGCGTGTGCGATGAAGGCCTTCGGGTGCTAAAGCACTTTTCGAGGGGATGAGGAAGG  
ACAGTACCCTCGGAATAAGTCTCGGCTAACTACGTGCCAGCAGCCGCGGTAACACGTAGG  
AGGCGAGCGTTATCCGGATTTACTGGGCGTAAAGCGTGTGCAGGCGGTCTAGCAAGTTGG  
ATGTGAAAGCTCCTGGCTCAACTAGGAGAGGTCGTTCAATACTGCCAGACTCGAGGATGG  
TAGAGGGAGGTGGAATTCGAGTGTAGTGGTGAATGCGTAGATATTCGAGGAACACCA  
GTGGCGAAAGCGGCCTCCTGGACCATTTCTGACGCTCATAACGAAAGCTAGGGGAGCAA  
ACGGGATTAGAGACCCCCGTAGTCC

>Otu225

CCAGCCTACGGGTGGCAGCAGTGGGGAATATTGGACAATGGGGGCAACCCTGATCCAGCG  
ACGCCGCGTGTGTGAAGAAGGCCTGCGGGTGTAAAGCACTTTTAGTGGGGATGAAAAGC  
TCAGGGTTAACACCTCTGGGTCTTGACCTAACCACAGAAAAAGCACCGGCTAACTCTGT  
GCCAGCAGCCGCGGTAATACAGAGGGTGCAAGCGTTAATCGGAATTACTGGGCGTAAAGC  
GTGCGTAGACGGTTACATAAGTCGGGTGTGAAAGCCCCGGGCTCAACCTGGGAATTGCAT  
TCGAGACTGCGTAGCTAGGGTGCAGGAAGAGGGAAGCGGAATTTCCGGTGTAGCGGTGAAA  
TGCGTAGATATCGGAAGGAACACCAGTGGCGAAGGCGGCTTCCTGGTCCAGCACCGACGT  
TCAGGCACGAAAGCGTGGGGAGCAAACAGGATTAGAAACCCGCGTAGTCC

>Otu226

CCAGCCTATGGGTGGCAGCAGTAAGGAATATTGGACAATGGGCGCAAGCCTGATCCAGCC  
ATGCCGCGTGAAGGATGAAGGTCCTCTGGATTGTAAACTTCTTTTATATGGGACGAAAAA  
AGGGGAATCCTCCCCTCTTGACGGTACCGTATGAATAAGCACCGGCTAACTCCGTGCCAG  
CAGCCGCGGTAATACGGAGGGTGCGAGCGTTATCCGGATTAAGTGGGTTAAAGGGTGCG  
TAGGCGGGCAGGTAAAGTCAGTGGTGAATCCCGGAGCTTAACCTCTGGAATGCCATTGAT  
ACTATCTGCCTTGAATATTGTGGAGGTTTGCGGAATATGTCATGTAGCGGTGAAATGCAT  
AGATATGACATAGAACACCTATTGCGAAGGCAGCAGGCTACGCATATATTGACGCTGAGG  
CACGAAAGCGTGGGGATCAAAACAGGATTAGATACCCGAGTAGTCC

>Otu227

CCAGCCTACGGGGTGCAGCAGTGGGGAATCTTGACAATGGGGGCAACCCTGATGCAGCG  
ACGCCGCGTGAGCGATGAAGCCCCCTCGGGGTGTAAAGCTCTTTCGGCAGGGACGATAATG  
ACGGTACCTGAAGAAGAAGCTGCGGCTAACTACGTGCCAGCAGCCGCGGTAATACGTAGG  
CAGCGAGCGTTGTTTCGGAATTACTGGGCGTAAAGAGTGTGTAGGCGGTGCTCTAAGTTTCG

GTGTGAAATCTCCTGGCTTAACTGGGAGGGTGCGCCGGAAACTGGAGTGCTCGAGCGTG  
GAGAGGAAAGCGGAATTCCTGGTGTAGCGGTGAAATGCGTAGATATCAGGAGGAACACCT  
GCGGTGTAGACGGCTTTCTGGACCATTGCTGACGCTGAGACACGAAAGCGTGGGTAGCAA  
ACAGGATTAGAAACCCTAGTAGTCC

>Otu228

CCAGCCTATGGGGCGCTCCAGGCGCGAAACCTCTCCAATGCACGCAAGTGTGAGAGGGGA  
ATCCCAAGTGCTCAGGCAAAGCCTGGGCTTTTGCTATGTGTAAATAGCATGGCGAATAAG  
TGGTGGGTAAGACTGGTGCCAGCCGCCGCGGTAACCCAGCGCCACAAGTGGCACTCGCG  
TTTATTGGGCCTAAAGCGTCCGTAGCAGGTCTTATACATCTCTTGTGAAATTGCCAGGCT  
CAACTTGGCAGAGTGAGGAGGCACTGTAGGACTTGAGACCGGGAAGGGTTAGAGGTATT  
CCTGAGGGAGCGGTAAAATGCTATAATCTCAGGAGGACCACCTGTGGCGAAGGCGTCTAA  
CTAGAACGGATCTGACTGTGAGGGACGAAAGCTAGGGGAGCAAACGGATTAGAGACCCG  
CGTAGTCC

>Otu229

CCAGCCTATGGGTGGCAGCAGTGGGGAATTTTTCGCAATGGGGGAAACCCTGACGCAGCA  
ACGCCGCGTGAGGATGAAATCCCTTGGGATGTAAACTCCTTTTCGATAGGGAAGATTATG  
ACGGTACCTATAGAAGAAGCCCCGGCTAACTTCGTGCCAGCAGCCGCGGTAATACGAGGG  
GGGCAAGCGTTGTTTCGGAATTATTGGGCGTAAAGGGTGCGTAGGCGGTTTGGCAAGTCTT  
ATGTGAAATCTATGGGCTCAACCCATAGTCTGCATGAGAACTGCCGGGCTTGAGTATGG  
GAGAGGTGAGTGGAATTTCCGGTGTAGCGGTGAAATGCGTAGATATCGGAAGGAACACCT  
GTGGCGAAAGCGGCTCACTGGACCATAACTGACGCTGAGGCACGAAAGCTAGGGGAGCAA  
ACAGGATTAGATACCCCCGTAGTCC

>Otu230

CCAGCCTATGGGAGGCAGCAGTGGGGAATTTTTCGCAATGGGGGAAACCCTGACGCAGCA  
ACGCCGCGTGAGGATGAAGTATCTCGGTACGTAAACTCCTTTTCGATGGGGAAGATAATG  
ACGGTACCCATAGAAGAAGCCCCGGCTAACTTCGTGCCAGCAGCCGCGGTAATACGAGGG  
GGGCAAGCGTTGTTTCGGAATTTATTGGGCGTAAAGGGTGCGTAGGCGGTTTGGCAAGTCTT  
GTGTGAAATCTATGGGCTCAACCCATAGCCTGCACGAGAACTACCGGGCTTGAGTGATG  
GAGAGGTGAGTGGAATTTCCGGTGTAGCGGTGAAATGCGTAGATATCGGAAGGAACACCT  
GTGGCGAAAGCGGCTCACTGGACATTAACTGACGCTGATGCACGAAAGCTAGGGGAGCAA  
ACAGGATTAGAAACCCCGGTAGTCC

>Otu231

CCAGCCTATGGGGGGCAGCAGTGAAGGAATATTGGTCAATGGGCGGAAGCCTGAACCAGCC  
ATCCCGCGTGAGGGAAGACGGCGCTATGCGTTGTAAACTGCTTTTCCAGGGGAAGAAAAC  
CCACGACGAGTCGTGGCTTGCCGTGACCTGGGAATAAGCATCGGCTAACTCCGTGCCAG  
CAGCCGCGGTAATACGGAGGATGCGAGCGTTATCCGGATTTATTGGGTTTAAAGGGTGCG  
TAGGCGGAATAATAAGTCAGTGGTGAAAACCTTCAGCTTAACTGGAGACTTGCCATTGAT  
ACTGTTAATCTTGAGTACGGTCAAGGTAGGCGGAATGTGTAATGTAGCGGTGAAATGCTT  
AGATATTACACAGAACACCGATTGCGAAGGCAGCTTACTGGGCCAATACTGACGCTGATG  
CACGAAAGCGTGGGGAGCGAACAGGATTAGAAACCCAGTAGTCC

>Otu232

CCAGCCTATGGGGGGCTGCAGTGGGGAATATTGGACAATGGGCGCAAGCCTGATCCAGCA  
ATGCCGCGTGAGTGATGAAGGCCTTAGGGTTGTAAAGCTCTTTTCGCACGCGACGATGATG  
ACGGTAGCGTGAGAAGAAGCCCCGGCTAACTTCGTGCCAGCAGCCGCGGTAATACGAAGG  
GGGCTAGCGTTGTTTCGGAATTACTGGGCGTAAAGGGCGCGTAGGCGGCGTTACAAGTTAG  
GCGTGAAAGCCCCGGGCTCAACCTGGGAATTGCGCTTGATACTGTAGTGCTAGAGTTTCGG  
GAGAGGTGAGTGGAATTTCCAGTGTAGAGGTGAAATTCGTAGATATTGGGAAGAACACCG  
GTGGCGAAGGCGGCTCACTGGACCATACTGACGCTGAGGCGCGAAAGCGTGGGGAGCAA  
ACAGGATTAGATACCCAGTAGTCC

>Otu233

CCAGCCTATGGGGCGCAGCAGTGGAGAATATTTGACAATGAGCGAAAGCTTGATCGAGTA  
ATGTTACGTGGATGATAAGAAAGCTTAATTGCTGTAAAGTTCGTTTTGTCAAGGATTATA  
ATGTAATTGTACTTGAAGGAGAAGCCCTGACTAACTTCGTGCCAGCAGTCGCGGTAATAC  
GGAGAGGGCGAGTGTTATTTCGTATTGACTGGGTGTAAAGGGTAAGTAGGTTGTTTTTCAA  
GTTTTAAATTAAATACCAAGTATTATTTTGGACTATTTTCAATACTGATAAACTAGAGTT  
TAAGCGGAGGAGGTTGAACATTAGGAGTAGGGGTAAAATCCTTCAATATTTAAAGGGCAG  
CCAATAAGCGAAGGCTACTTTCTAGCTTAAACTGACACTGAGGTACAAAAGCGTAGGGA  
TCGAACGGGATTAGAAACCCCTCGTAGTCC

>Otu234

CCAGCCTATGGGAGGCAGCAGTGGGGAATCTTGACAAATGGAGGAACTCTGATGCAGCG  
ACGCCGCGTGAGCGATGAAGCCCTTCGGGGTGTAAGCTCTTTTCGACGGGAACGATAATG  
ACGGTACCCGGAGAAGAAGCTGCGGCTAACTACGTGCCAGCAGCCGCGGTAATACGTAGG  
CAGCAAGCGTTGTTCCGAATTACTGGGCGTAAAGAGTGTGTAGGTGGTGCTCCAAGTCTG  
TTGTGAAATCTCCCGGCTTAACTGGGAGGGTGACGCGGAACTGGAATGCTTGAGGATGG  
GAGAGGAAAGCGGAATTCCTGGTGTAGCGGTGAAATGCGTAGATATCAGGAGGAACACCC  
GTGGTGTAGACAGCTTTCTGGACCATATCTGACACTGAGACACGAAAGCGTGGGTAGCAA  
ACAGGATTAGATACCCCCGTAGTCC

>Otu235

CCAGCCTATGGGAGGCACCAGTCGAGAATATTCGACAAATGGGCGAAAGCCTGATCGAGCG  
ACGCCGCGTGACAGGATGAAGTGCTTCGGTATGTAACTGCTTTTGTAGACCAGAAAGTTT  
ATTGATCGGTCTAAGAATAAGAGGTTGCTAACTCGTGCCAGCAGCAGCGGTAATACGAG  
TGCCTCGAGCGTTATCCGGAATCATTGGGCGTAAAGGGTGTGCAGGCGGTCTGATTAGTC  
TTCTGTTAAATTCTTCGGCTTAACCGGGGACATGCAGGGGAAACGGTCAGACTTGAGGAT  
GCGAGAGGTTAACGGAACCTCATAGTGTAGCGGTGAAATGCGTTGATATTATGGGGAACAC  
CAAATGCGAAGGCAGTTAACTGGAGCACTCCTGACGCTGAAACACGAAAGCGTGGGTAGC  
GAATGGGATTAGATACCCTCGTAGTCC

>Otu237

CCAGCCTATGGGGGGCACCAGTGAGGAATATTGGGCAATAGGCGCAAGCCTGACCCAGCC  
ATGCCGCGTGAGGATGACTGCCCTATGGGTTGTAACTTCTTTTATACGGGAAGAACT  
TTCGAACGTGTTCCGAATTGACGGTACTGTATGAATAAGCATCGGCTAACTCCGTGCCAG  
CAGCCGCGGTAATACGGAGGATGCAAGCGTTATCCGGATTCAATTGGGTTTAAAGGGTGCG  
TAGGCGGGTTGATAAGTCAGTGGTGAAATCCTGCAGCTTAACTGTAGAACTGCCATTGAT  
ACTGTTAACCTTGAATGCAGTTGAGGTAGGCGGAATGTGTAATGTAGCGGTGAAATGCGT  
AGATATTACACAGAACACCGATTGCGAAGGCAGCTTGCTAACTGTGATTGACGCTGAGG  
CACGAAAGCGTGGGGATCAAACAGGATTAGATACCCGCGTAGTCC

>Otu238

CCAGCCTATGGGGGGCAGCAGTAAGGGATATTGGGCAATGGGCGAAAGCCTGACCCAGCA  
ACGCCGCGTGAGGAAGACAGTCTTCGGATTGTAACTCCTTTTGCAGGGGAAGAGGAAG  
GACGGTACCCTGCGAATCAGTCTCGGCTAACTACGTGCCAGCAGCCGCGGTAACACGTAG  
GAGGCGAGCGTTATCCGGATTTACTGGGCGTAAAGGGTGTGCAGGCGGGCCGTTAAGTGG  
TGCATGAAAGCGAAGGGCTCAACCCTTCGAGGCTGTGCCAGACTGGCGGGCTAGAGTGCG  
GGAGAGGGCTGTGGAATTCCGGGTGTAGTGGTGAAATGCGTAGAGATCCGGAGGAACACC  
AGAGGCGAAGGCGGCAGCCTGGTCCGCAACTGACGCTGAGACACGACAGCATGGGGAGCG  
AACGGGATTAGAAACCCTCGTAGTCC

>Otu239

CCAGCCTATGGGGGGCTGCAGTGGGGAATATTGGACAATGGGCGCAAGCCTGATCCAGCA  
ATGCCGCGTGAGTGAAGAAGGTCTTCGGATTGTAAAGCTCTTTTCGGCGGGGACGATGATG  
ACGGTACCCGCGAGAAGAAGCCCCGGCTAACTTCGTGCCAGCAGCCGCGGTAATACGAAGG  
GGGCTAGCGTTGCTCGGAATGACTGGGCGTAAAGGGCGCGTAGGCGGCTGTCATAGTCAG  
ATGTGAAATTCTGGGCTTAACTGGGGGCTGCATTTGATACGTGGCGGCTAGAGTGCGG  
AAGAGGGTCGTGGAATTCCAGTGTAGAGGTGAAATTCGTAGATATTGGGAAGAACACCG  
GTGGCGAAGGCGGCGACCTGGTCCGTAACCTGACGCTGAGGCGCGAAAGCGTGGGGAGCAA  
ACAGGATTAGATACCCTTGTAGTCC

>Otu240

CCAGCCTATGGGGTGCTGCAGTGGGGAATATTGCGCAATGGGCGAAAGCCTGACGCAGCG  
ACGCCGCGTGAGGGATGAAGGCCTTCGGGTGTAAACCTCTTTTCAGCAGGGACGAAGCGA  
AAGTGACGGTACCTGCAGAAGAAGCACCGGCTAACTACGTGCCAGCAGCCGCGGTAATAC  
GTAGGGTGCAAGCGTTGTCCGATTTATTGGGCGTAAAGAGCTCGTAGGCGGTTTGTTCGC  
GTCGGATGTGAAAACCCAGGGCTCAACCCTGGGCCTGCATTCGATACGGGCAGACTAGAG  
TATGGCAGGGGAGACTGGAATTCCTGGTGTAGCGGTGAAATGCGCAGATATCAGGAGGAA  
CACCGGTGGCGAAGGCGGGTCTCTGGGCCAAAACCTGACGCTGAGGAGCGAAAGCGTGGGG  
AGCGAACAGGATTAGATACCCTAGTAGTCC

>Otu241

CCAGCCTATGGGGGGCTCCAGTCGAGGATCTTCGGCAATGGGCGCAAGCCTGACCGAGCG  
ACGCCGCGTGTCGATGAAGGCCTTCGGGTGTAAAGCACTGTGAGGGAGAGGAAGCCG  
CAAGGTTGACCGACCCCTGGAGGAAGCACGGGCTAAGTTCGTGCCAGCAGCCGCGGTAAG

ACGAACCGTGCGAACGTTGTTTCGGAATCACTGGGCTTAAAGGGCGCGTAGGCGGGCTGTG  
AGGTCCGGGGTGAAAGCACACGGCTTAACCGTGTAATTGCCTGGGATACCGGCAGTCTGG  
AGGAGGGTAGGGGCATGTGGAACCTCCGGTGGAGCGGTGAAATGCGTTGATATCGGAAGG  
AACGCCGGTGGCGAAAGCGACGTGCTGGGCCCTTCCTGACGCTGAGGCGCGAAAGCCAGG  
GGAGCAAACGGGATTAGATACCCAGTAGTCC

>Otu242

CCAGCCTACGGGGTGCAGCAGTGGGGAATTTTGCGCAATGGGGGAAACCCTGACGCAGCA  
ATGCCGCGTGGAGGATGAAGTCCTTTGGGATGTAACTCCTTTTCGATCGGGAAGATAATG  
ACGGTACCGGAAGAAGAAGCCCCGGCTAACTCTGTGCCAGCAGCCGCGGTAATACAGAGG  
GGGCAAGCGTTGTTTCGGAATTATTGGGCGTAAAGGGCGCGTAGGCGGTGCGGTAAGTCAC  
CTGTGAAATCTCTGGGCTCAACTCAGAGTCTGCAGGCGAAACTGCCGTGCTTGAGTGTGG  
GAGAGGTGAGTGGAATTCCCGGTGTAGCGGTGAAATGCGTAGATATCGGGAGGAACACCT  
GTGGCGAAAGCGGCTCACTGGACCACAACCTGACGCTGATGCGCGAAAGCTAGGGGAGCAA  
ACAGGATTAGATACCCTTGTAGTCC

>Otu243

CCAGCCTACGGGGGGCTCCAGTGGGGAATTTTGCGCAATGGGGGAAACCCTGACGCAGCA  
ACGCCGCGTGGAGGATGAAATCCCTTGGGATGTAACTCCTTTTCGATCGGGACGATTATG  
ACGGTACCGGAAGAAGAAGCCCCGGCTAACTTCGTGCCAGCAGCCGCGGTAATACGAGGG  
GGGCAAGCGTTGTTTCGGAATTATTGGGCGTAAAGGGAGTGTAGGCGGTTTGGTAAGTTGT  
GTGTGAAATCTTCGGGCTCAACCCGAAGTCTGCACACAAAACCTGCCGGGCTTGAGGGTGG  
GAGAGGTGAGTGGAATTTCCCGGTGTAGCGGTGAAATGCGTAGATATCGGAAGGAACACCT  
GTGGCGAAAGCGGCTCACTGGACCATTCTGACGCTGAAACTCGAAAGCTAGGGGAGCAA  
ACAGGATTAGAGACCCGAGTAGTCC

>Otu244

CCAGCCTATGGGGGGCAGCAGTAAGGAATATTGGTCAATGGAGGCAACTCTGAACCAGCC  
ATGCCGCGTGCAGGATGACGGCCCTATGGGTGTAACTGCTTTTGTACGGGAGAAAACC  
CTTTCACGTGTGAGAGGTTGATAGTACCGTAAGAATAAGCATCGGCTAACTTCGTGCCAG  
CAGCCGCGGTAAGACGAAGGATGCAAGCGTTATCCGGATTCAATTGGGTTTAAAGGGAGCG  
TAGGTGGACTTGTAAGTCAGTGGTGAAATCTCTTCGCTTAACGAAGAACTGCCATTGAT  
ACTGCAGGTCTTGAGTACAGATGATGTGGGCGGAATATGACATGTAGTGGTGAAATACTT  
AGATATGTCATAGAACACCGATTGCGAAGGCAGCTCACAAAACCTGTAACCTGACACTGAGG  
CTCGAAAGTGCGGGGATCAAACAGGATTAGAAACCCGAGTAGTCC

>Otu245

CCAGCCTATGGGGGGCAGCAGTGGGGAATATTGGACAATGGGCGCAAGCCTGATCCAGCA  
ATGCCGCGTGAGTGAAGAAGGTCTTCGGATTGTAAAGCTCTTTCGACGGGGACGATGATG  
ACGGTACCCGTAGAAGAAGCCCCGGCTAACTTCGTGCCAGCAGCCGCGGTAATACGAAGG  
GGGCTAGCGTTGCTCGGAATGACTGGGCGTAAAGGGCGCGTAGGCGGATGACACAGTCAG  
GCGTGAAATTTCCCGGGCTCAACCTGGGGACTGCGCTTGATACATGTTGTCTTGAGTTCGG  
AAGAGGGTCGTGGAATTTCCAGTGTAGAGGTGAAATTCGTAGATATTGGGAAGAACACCG  
GTGGCGAAGGCGGCGACCTGGTCCGACACTGACGCTGAGGCGCGAAAGCGTGGGGAGCAA  
ACAGGATTAGAAACCCCGTAGTCC

>Otu246

CCAGCCTATGGGAGGCTCCAGTGGGGAATATTGGACAATGGGCGCAAGCCTGATCCAGCC  
ATGCCGCGTGGGTGATGAAGGCCTTAGGGTTGTAAAGCCCTTTCGGCGGGGAAGATAATG  
ACGGTACCCGCGAGAAGAAGCCCCGGCTAACTTCGTGCCAGCAGCCGCGGTAATACGAAGG  
GGGCTAGCGTTGCTCGGAATCACTGGGCGTAAAGCGCACGTAGGCGGATCGTTAAGTCAG  
GGGTGAAATCCTGGAGCTCAACTCCAGAACTGCCTTTGATACTGGCGATCTCGAGTTCGG  
GAGAGGTGAGTGGAATGCGAGTGTAGAGGTGAAATTCGTAGATATTGCGAAGAACACCA  
GTGGCGAAGGCGGCTCACTGGCCCGATACTGACGCTGAGGTGCGAAAGCGTGGGGAGCAA  
ACAGGATTAGAAACCCCGTAGTCC

>Otu247

CCAGCCTATGGGGTGCACCAGTGGGGAATTTTGGACAATGGGCGCAAGCCTGATCCAGCC  
ATGCCGCGTGAGTGAAGAAGGCCTTCGGGTGTAAAGCTCTTTCGGTGGGGAAGAAATTG  
CTTCGGTTAATACCTGGAGTAGATGACGGTACCTGCATAAGAAGCACCGGCTAACTACGT  
GCCAGCAGCCGCGGTAATACGTAGGGTGCAGCGTTAATCGGAATTACTGGGCGTAAAGC  
GTGCGCAGGCGGTTGTATAAGTCAGATGTGAAATCCCCGGGCTCAACCTGGGAACTGCAT  
TTGAGACTGTACGGCTAGAGTTTGGCAGAGGGGGGTGGAATTCACGTGTAGCAGTGAAA  
TGCGTAGAGATGTGGAGGAACACCGATGGCGAAGGCAGCCCCCTGGGCCAATACTGACGC

TCATGCACGAAAAGCGTGGGGAGCAAACAGGATTAGATACCCTAGTAGTCC

>Otu248

CCAGCCTATGGGTGGCAGCAGTAGGGAATATTGCGCAATGGACGAAAGTCTGACGCAGCA  
ACGCCGCGTGTGGGATGAAGCTCCTTGGAGTGTAACCCTGTCTGGGAGGGACGAACGAT  
TACGACTCTAACATAGTCGTAGTTTACTGTACCTTCAGAGGAAGCTCCGGCTAACTCCG  
TGCCAGCAGCCGCGGTAATACGGGGGAGCGAGCGTTGTTTCGGAATCACTGGGCGTAAAG  
GGTGCAGCAGCGGGAGACTAAGTCGGATGTGAAAACCTCGGGCTCAACCCGAGGCCTGCA  
TTCGAAACTGATCTTCTTGAGTATCGGAGAGGAAAGTAGAACTCCAGGTGTAGCGGTGAA  
ATGCGTAGATATCTGGAGGAATACCTGTGGCGAAGGCGGCTTTCTGGCCGAATACTGACG  
CTCATGCACGAAGGCTAGGGGAGCAAACAGGATTAGAAACCCCCGTAGTCC

>Otu249

CCAGCCTACGGGGGGCTGCAGTGAGGAATTTTTCGCGCAATGGCCGCAAGGCTGACGCAGCA  
ACGCCGCGTGGGTGAAGAAGGCCTTCGGGTCGTAAAGCCCTGTCAGGTGGGAAGAATGGC  
TGGGGGACTAATAATCTCTCAGATTGACGGTACCACCAGAGGAAGCACCAGGCTAACTCCG  
TGCCAGCAGCCGCGGTAATACGGAGGGTGAAGCGTTATTTCGGAATTACTGGGCGTAAAG  
CGCGTGCAGGCGGGCGGACAAGTCTGATGTGAAAGCCCCGGGCTCAACCTGGGAAGTGCA  
TTGGAAACTGTTCTGCTTCTGAGTTCTGGAGAGGAAGGGGAATTCCCGGTGTAGAGGTGAA  
ATTCTGAGAGATCGGGAGGAATACCAGTGGCGAAGGCGCCCTTCTGGACGGCAACTGACG  
CTGAGACGCGAAAGCGTGGGGAGCAAACAGGATTAGAGACCCGGGTAGTCC

>Otu250

CCAGCCTATGGGGGGCAGCAGTCGAGAATATTTCGACAATGGGCGAAAGCCTGATCGAGCG  
ACACCGCGTGCAGGATGAAGGCCTTCGGGTGTAAACTGCGGTAGTATGGTAACAATGCA  
AATGAGTGCCATACGGAAAGAGGTGGGTAACCTACGTGCCAGCACCAGCGGTAATACGTAG  
ACCTCAAGCGTTATCCGGATTTATTGGGCGTAAAGAGCATGTAGGAGGTTTTGCGCGTCT  
TTTGTAAATCCCATCGCCCAACGATGGAGCCGCAAGAGATACGGCAGAACTAGAGGGGG  
TTAGAGGTGCATGGAGCGCACGGTGTAGGGGTGAAATCCGTTGATATCGTGCGAAACACC  
AAAGGCGAAGGCAGTGCCTGGGACCTTCTGACTCTGAGATGCGAAAGCGTGGGGAGCA  
AAAAGGATTAGATACCCGAGTAGTCC

>Otu251

CCAGCCTACGGGAGGCAGCAGTGAGGAATATTGCGCAATGGCCGAAAGGCTGACGCAGCG  
ACGCCGCGTGAAGGATGAAGTCCGTTAGGATGTAAACTTCTTTTGCAGGGGATGAATGTT  
CCCGCTTCGGCGGGACTTGACCGTACCCTGCGAATAAGGATCGGCTAACTACGTGCCAGC  
AGCCGCGGTAATACGTAGGATCCGAGCGTTGTCCGGAATTACTGGGTGTAAAGGGCGTGT  
AGGTGGGGCTTTAAGTCGGTGGTGAATCCTGCAGCTTAAGTGCAGAAATGCCCTCGATA  
CTGAGGCTCTTGAGTACGGCAGAGGGAGATGGAATTCATGGTGTAGCGGTGAAATGTGTA  
GATATCATGAAGAACACCAGTAGCGAAGGCGGTCTCCTGGTCCGTAAGTACACTGAGGC  
GCGAAAGCGTGGGGAGCAAACAGGATTAGATACCCAGTAGTCC

>Otu252

CCAGCCTACGGGGGGCAGCAGTGGGGAATATTGGACAATGGGGGCAACCCTGATCCAGCA  
ATGCCGCGTGGGTGAAGACGGCCTGCGGGTTGTAAAGCCCTTTAGGCGGGGAGGAACGGC  
GGTACGCGAACAGCGCGCCGCTCTGACGTTACCCGCGAGAATAAGCACCAGGCTAACTCCGT  
GCCAGCAGCCGCGGTAATACGGAGGGTGCAGCGTTAATCGGAATTACTGGGCGTAAAGC  
GTGCGTAGGCGGTTTCGGTCAGTCAGCCGTGAAAGCCCCGGGCTCAACCTGGGAACGGCGG  
TTGAGACGGCCGACTGGAGTGGGCTAGAGGATCGTGGAACCTCCCGGTGTAGCGGTGAAA  
TGCGTAGAGATCGGGAAGAACACCGATGGCGAAGGCAGCGATCTGGGGCCACACTGACGC  
TGAGGCACGACAGCGTGGGGAGCAAACAGGATTAGATACCCAGTAGTCC

>Otu253

CCAGCCTATGGGGCGCACCAGCCAAGAATCTTCCGCAATGGGGGAAACCCTGACGGAGCG  
ACGCCGCGTGAGGGATGAAGGTCTTCGGATTGTAAACCTCTTTTGTTCGGGAAGAATAAG  
TCTGTCAGGAAATGGGCAGATGATGACGGTACCGAATGAATAAGCCCCGGCTAATTACGT  
GCCAGCAGCCGCGGTAATACGTAAAGGGGCTAGCGTTGCTCGGAATTACTGGGCGTAAAGG  
GCGTGTAGGCGGCCGGATAAGTCGAATGTAAAAAACAGGGCTTAACCTGGGGCTGCGT  
TCGAAACTGCTCGGCTTGAGTCTGGTGGAGGGTAATGGAATTCCTGGGTGTAGCGGTGAAA  
TGCGTAGATATCGGGAAGAACACCGAAGGCGAAGGCAGTTACCTATGCCGAGACTGACGC  
TGAGGCGCGAAAGCATGGGGATCAAACAGGATTAGATACCCCGGTAGTCC

>Otu254

CCAGCCTACGGGAGGCAGCAGTAAGGAATATTGGTCAATGGACGCAAGTCTGAACCAGCC  
ATGCCGCGTGGAGGATTAAGGCCCTCTGGGTGTAAACTCCTTTTATCTGGGAAGAAATC

CATATATTCTTATGTGGTTGACGGTACCAGAGGAATAAGCACCGGCTAACTCCGTGCCAG  
CAGCCGCGGTAATACGGAGGGTGCAAGCGTTATCCGGATTCACTGGGTTTAAAGGGTGCG  
TAGGCGGGTAAGTAAGTCCGTGGTGAAATCTCTGAGCTTAACTCAGAACTGCCGTGGAT  
ACTATTTGCCCTTGAATATTGTGGAGGTGAGCGGAATATGTCATGTAGCGGTGAAATGCTT  
AGATATGACATAGAACACCAATTGCGAAGGCAGCTCACTACACAATCATTGACGCTGAGG  
CACGAAAGCGTGGGGATCAAACAGGATTAGATACCCCCGTAGTCC

>Otu255

CCAGCCTACGGGATGCTGCAGTAAGGAATATTGGTCAATGGGCGCAAGCCTGAACCAGCC  
ATGCCGCGTGACAGGAAGACGGCCCTACGGGTTGTAACTGCTTTTGCAGGGGAATAAACC  
CCCGTACGTGTACGGGGCTGAATGTACTCTGAGAATAAGGATCGGCTAACTCCGTGCCAG  
CAGCCGCGGTAATACGGAGGATCCAAGCGTTATCCGGATTTATTGGGTTTAAAGGGTGCG  
TAGGCGGCCTATTAAGTCAGGGGTGAAAGACGGTAGCTTAACTATCGCAGTGCCTTTGAT  
ACTGATGGGCTTGAATGTACTTGAGGTAGGCGGAATGTGACAAGTAGCGGTGAAATGCAT  
AGATATGTACAGAACACCAATTGCGAAGGCAGCTTACTAAAGTATGATTGACGCTGAGG  
CACGAAAGCGTGGGGATCAAACAGGATTAGATACCCGAGTAGTCC

>Otu256

CCAGCCTACGGGGCGCAGCAGTGGGGAATTTTGCGCAATGGGGGAAACCCTGACGCAGCA  
ACGCCGCGTGAGGATGAAGGCCCTTGGGTCGTAACTCCTTTTCGACCGGGAAATTATG  
ATGGTACCGGTGGAAGAAGCACCGGCTAACTCTGTGCCAGCAGCCGCGGTAATACAGAGG  
GTGCGAGCGTTGTTCCGAATTATTGGGCGTAAAGGGCGCGTAGGCGGTACGGTAAGTCAC  
CTGTGAAACCTCCGGGCTTAACTCGGAGCCTGCAGGCGAAACTGCCGTGCTGGAGTATGG  
GAGAGGTGCGTGGAATTCCTGGTGTAGCGGTGAAATGCGTAGATATCGGGAGGAACACCT  
GTGGCGAAAGCGGCGCACTGGACCATAACTGACGCTGAGGCGCGAAAGCTAGGGGAGCAA  
ACAGGATTAGATACCCCCGTAGTCC

>Otu257

CCAGCCTATGGGTGGCTGCAGTGGGGAATCTTGCGCAATGGGCGAAAGCCTGACGCAGCC  
ATGCCGCGTGATGATGAAGGTCTTAGGATTGTAAATCCTTTACCGGGGACGATAATG  
ACGGTACCCGGAGAAGAAGCCCCGGCTAACTTCGTGCCAGCAGCCGCGGTAATACGAAGG  
GGGCTAGCGTTGCTCGGAATTACTGGGCGTAAAGGGAGCGTAGGCGGGTCGTTAAGTTGG  
GGGTGAAAGCCCCGGGGCTCAACCTCGGAAATGCCTTCAATACTGGCGACCTTGAGTGTGG  
GAGAGGTGAGTGGAACCTCCGAGTGTAGAGGTGAAATTCGTAGATATTTCGGAAGAACACCA  
GTGGCGAAGGCGACTCACTGGCCCATTACTGACGCTGAGGCTCGAAAGCGTGGGGAGCAA  
ACAGGATTAGATACCCCCGTAGTCC

>Otu258

CCAGCCTACGGGGTGACAGCAGTTAGGAATCTTCTGCAATGCGCGCAAGCGTGACAGATTG  
AGCCAGAGTGCTTTTTCATTTGAAAAGCTTTTGCCAAATGCAAAAAGTTTGGCGAATAAGG  
ACTGGGTAAAGACGGGTGCCAGCCGCCGCGGTAATACCCGCGGTCCAAGTCGCAGCCATCA  
TTATTGGGTCTAAAACATCCGTAGCTTGCTTAATAAGTTTCTTGTGAAATTCATATCTC  
AAGTATAGATCGGGCAAGAAGTACTGTAAAGCTAGAGACTGGAAGACGTAAGAAGTACGT  
TTGGAGTAGCGGTAAAATGTGTTAATCCAGACGGAATAACAACAGCGAAGGCATCTTAC  
GAGGACAGTTCTGACAGTAAGGGATGAAGGCTAGGGGCGCAAAACGGATTAGAGACCCGT  
GTAGTCC

>Otu259

CCAGCCTATGGGAGGCAGCAGTAAGGGATATTGCGCAATGGGCGAAAGCCTGACGCAGCA  
ACGCCGCGTGAGGATGAAGGCCTTCGGGTCGTAACTCGTTTTTGCCTCTGACGAGGAAG  
GACGGTAGGACGCGAAGAAGTCACGGCTAACTACGTGCCAGCAGCCGCGGTAAAACGTAG  
GTGGCGAGCGTTATCCGGATTTACTGGGCGTAAAGGGTGTGCAGGCGGACCGTCAAGTGG  
TGTATGAAAACGCCGGGCTTAACTCGGCGATGGTAGGCCAGACTGACGGTCTAGAGGACG  
AGAGAGGGGCATGGAATTCCGGGTGTAGTGGTGAATGCGTAGAGATCCGGAAGAACCCC  
AGAGGCGAAGGCGGTGCCCTGGCTCGTATCTGACGCTCAGCCACGACAGCATGGGGAGCG  
AACGGGATTAGAAACCCAGTAGTCC

>Otu260

CCAGCCTATGGGGGGCAGCAGTAGGGAATTTTCCACAATGGGCGAGAGCCTGATGGAGCA  
ACACCGCGTGACAGGATGAAGGCCTTAGGGTCGTAACTGCTTTTATGTATGAAGATTATG  
ACGGTAGTACATGAATAAGGATCGGCTAACTCCGTGCCAGCAGCCGCGGTACATACGGAGG  
ATCCAAGCGTTATCCGGAATTACTGGGCGTAAAGAGTTGCGTAGGTGGCAGAGTAAGCAG  
GGCATGAAAGCGTGTGGCTCAACCATACATACATGTTCTGAACTGCTCAGCTTGAGGACG  
AGAGAGGTAATTGGAATTCCTAGTGTAGGAGTGAATCCGTAGATATTAGGAGGAACACC

GATGGCGTAAGCAGATTACTGGCTCGTTTCTGACACTAAGGCACGAAAGCGTGGGGAGCA  
AACGGGATTAGAGACCCCTGTAGTCC

>Otu261

CCAGCCTATGGGGCGCAGCAGTCGGGAATTTTGGGCAATGGGCGAAAGCCTGACCCAGCA  
ACGCCGCGTGAGGGATGAAGGCCTTCGGGTCGTAAACCTCTTTTCTCAGGGACGATAATG  
ACGGTACCTGAGGAAGAAGCCACGGCTAACTACGTGCCAGCAGCCGCGGTAATACGTAGG  
TGCGGAGCGTTGTCCGGATTTACTGGGCGTAAAGCGCACGCAGGCGGTCTGTTCAAGTCGA  
ATGTGAAAGCCCCCGGCTCAACTGGGGAGGGTCATTTCGATACTGATCGACTTGAAGGCAG  
GAGAGGGAAGCGGAATTCCCGGTGTAGTGGTGAAATGCGTAGATATCGGGAGGAACACCA  
GTGGCGAAGGCGGCTTCCTGGCCTGTTCTTGACGCTGATGTGCGAAAGCTAGGGTAGCAA  
ACGGGATTAGAAACCCCAGTAGTCC

>Otu262

CCAGCCTATGGGTCGCTGCAGTAAGGGATATTGCACAATGGGCGAAAGCCTGATGCAGCA  
ACGCCGCGTGAGGATGAAGGCCTTCGGGTCGTAAACTCGTTTTGACGCTGACGAGCAAG  
GACGGTAGGCGTCGAATAAGTACGGCTAACTACGTGCCAGCAGCCGCGGTAAAACGTAG  
GTGGCGAGCGTTATCCGGATTTACTGGGCGTAAAGGGTGTGCAGGCGGGTTCATCAAGTGG  
TGTATGAAAGCCCCCAGCTAAACTGGGAAGGGTTATGCCAGACTGATGGTCTAGAGGACG  
AGAGAGGGGCGTGGAATTCCGGGTGTAGTGGTGAAATGCGTAGAGATCCGGAGGAACCCC  
AGAGGCGAAGGCGGCGCCCTGGCTCGTACCTGACGCTGATACACGAAAGCATGGGTAGCG  
AACGGGATTAGAAACCCCCGTAGTCC

>Otu263

CCAGCCTATGGGGGGCAGCAGACGAGAATATTCCGCAATGGACGAAAGTCTGACGGAGCG  
ACGCCGCGTGATGGATGAAGTGCCCTTGGTACGTAAACATCTTTTATCGGGGACGAAGTTT  
ATTGACGGTACCCGATGAATAAGGGGCTCCTAACTCTGTGCCAGCAGGAGCGGTAATACA  
GAGGCCCCAAGCATTACCCGGAATCACTGGGCGTAAAGGGTGTCTAGGCGGTTCATATTAG  
TCTCTCGTTAAATGTCCGGGCTTAACCTGGTCACCGCGAGGGAAACGGTATGACTCGAGG  
GCGTAAGAGGTGCACGGAACCTCATGGTGGAGGGGTGAAATCCGTTGATATCATGGGGAAC  
ACCAAAGGCGAAGGCAGTGCACCTGGTACGTTCTTGACGCTCAAACACGAAAGCCAGGGTA  
GCGAACGGGATTAGATACCCCCGTAGTCC

>Otu264

CCAGCCTACGGGTCGCAGCAGTCGAGGATCTTCGGCAATGGGCGCAAGCCTGACCGAGCG  
ACGCCGCGTGCGCGATGAAGGCCTTCGGGTTGTAAAGCGCTGTTCGAGGGGGAGGAAAGGG  
CAACCCTGACCTATCCCTGGAGGAAGCACGGGCTAAGTTCGTGCCAGCAGCCGCGGTAAG  
ACGAACCGTGCGAACGTTGTTTCGGAATCACTGGGCTTAAAGGGCGCGTAGGCGGATCATC  
AAGTCCGGGGTGAAAGCCCCCAGCTTAACTGGGGAAGTGCCTTGGATACTGGTGGTCTGG  
AGGGAGATAGGGGAGTTGGAACCTCCGGTGGAGCGGTGAAATGCGTTGATATCGGAAGG  
AACGCCGCTGGCGAAAGCGAACTGCTGGATCTCTTCTGACGCTGAGGCGCGAAAGCCAGG  
GGAGCAAACGGGATTAGATACCCCTGTAGTCC

>Otu265

CCAGCCTATGGGGGGCTCCAGTCGAGAATTTTTCACAATGGGCGAAAGCCTGATGGAGCG  
ACGCCGCGTGGGGGATGAATGGCTTCGGCCCGTAAACCCCTGTCATTTCGGGATCAATGCG  
TCTGGGTGAACATCCCAGACGTTGATAGTACCGGAAGAGGAAGGGACGGCTAACTCTGTG  
CCAGCAGCCGCGGTAATACAGAGGTCCCAAGCGTTGTTTCGGATTCACTGGGCGTAAAGGG  
TGCGTAGGTGGTTGGGTAAGTCTGATGTGAAATCTCGGAGCTTAACTCCGAAACTGCATT  
GGATACTATCTAGCTTGAGAGTTGGAGGGGGGACTGGAATTCTCGGTGTAGCAGTGAAAT  
GCGTAGATATCGAGAGGAACACCAGTGGCGAAGGCGAGTCCCTGGACAACCTCTGACACT  
GAGGCACGAAAGCCAGGGGAGCAAACGGGATTAGATACCCGCGTAGTCC

>Otu266

CCAGCCTATGGGTTGCAGCAGTGGGGAATCTTGGACAATGGGCGCAAGCCTGATCCAGCA  
ATGCCGCGTGGGTGAAGACGGCCTGCGGGTTGTAAAGCCCTTTTGGCGGGGAAGAAAGCC  
CTGGGTTGAACAGACTCAGGGGGTGACGTTACCTGCTGAAGAAGCACCGGCCAACTCCGT  
GCCAGCAGCCGCGGTAATACGGAGGGTGCGAGCGTTAATCGGAATTACTGGGCGTAAAGC  
GCGCGTAGGCGGTGGGTCAAGTCAGTTGTGAAAGCCCCGGGCTCAACCTGGGAATGGCAA  
TTGAGACTGACCGACTGGAGTGTAAACAGAGGACCGTGGAATTTCCCGGTGTAGCGGTGAAA  
TGCGTAGAGATCGGGAAGAACACCGATGGCGAAGGCAGCGGTCTGGGTTAACTGACGC  
TGAGGTGCGAAAGCGTGGGGAGCAAACAGGATTAGAAACCCGAGTAGTCC

>Otu267

CCAGCCTATGGGTGGCAGCAGTGGGGAATATTGGGCAATGGGCGAAAGCCTGACCCAGCC



ACGCCGCGTGAGTGATGAAGGCCTTCGGGTCGTAAAGCTCTGTGGGGAGGGACGAATAAG  
CGCGTATTAAATAAATACGTGCCCTGACGGTACCTCCTTAGCAAGCACCGGCTAACCATG  
TGCCAGCAGCCGCGGTAATACATGGGGTGCAAACGTTGCTCGGAATCATTGGGCGTAAAG  
CGCGCGTAGGCGGTTCGCTTAAGTCGGATGTGAAATCCCTCGGCTTAAGTGAAGAGTGA  
TCCGAGACTGAGCAGCTAGAGTACGAAAGAGGGTTCGCGGAATTCCCGGTGTAGAGGTGAA  
ATTCGTAGATATCGGGAGGAACACCGGCGGCGAAGGCGGCGACCTGGTTCGAGACTGACG  
CTGAGGCGCGAAAGCGTGGGGAGCAAACAGGATTAGAGACCCCCGTAGTCC

>Otu268

CCAGCCTATGGGATGCAGCAGTGGGGAATATTGGACAATGGGCGCAAGCCTGATCCAGCC  
ATGCCGCGTGATGATGAAGGCCTTAGGGTTGTAAAATCCTTTGACGGGGAAGATAATG  
ACGGTACCCGTAGAAGAAGCCCCGGCTAACTTCGTGCCAGCAGCCGCGGTAATACGAAGG  
GGGCTAGCGTTGCTCGGAATCACTGGGCGTAAAGCGCACGTAGGCGGCTTTTTAAGTCAG  
AGGTGAAATCCTGGAGCTCAACTCCAGAACTGCCTTTGATACTGAAGAGCTTGAGTCCGG  
GAGAGGTGAGTGGAAGTGCAGTGTAGAGGTGAAATTCGTAGATATTGCAAGAACACCA  
GTGGCGAAGGCGGCTCACTGGCCCGGTACTGACGCTGAGGTGCGAAAGCGTGGGGAGCAA  
ACAGGATTAGAAACCCCAGTAGTCC

>Otu269

CCAGCCTATGGGTTGCAGCAGTCGAGAATATTTCGACAATGGAGGAAACTCTGATCGAGCG  
ACGCCGCGTGACAGGAAGAAGTGCTTCGGTATGTAAACTGCTTTTGTAGACTAGTAATTTT  
TGAACAGTCTAAGAATAAGAGGTTGCTAAACTCGTGCCAGCAGCAGCGGTAATACGAGTG  
CCTCAAGCGTTATCCGGAATTATTGGGCGTAAAGGGTGTGTAGGTGGTTTTGTAGTCTT  
CTGTAAATCTCTCGGCTTAACCGAGAGCGTGCAGGGGAAACGGCAAGACTTAGAGTGTG  
CGAAGGGTCTGTGGAAGTCACTAGTGTAGCGGTGAAATGCGTTGATATTATGGGGAACACC  
AAAAGCGAAGGCAGCAGACTGGAGCATTACTGACACTGAAACACGAAAGCGTGGGTAGCG  
AATGGGATTAGAAACCCCTCGTAGTCC

>Otu270

CCAGCCTATGGGGGGCTCCAGTAGGGAATATTGGGCAATGGGCGAAAGCCTGACCCAGCA  
ACGCCGCGTGTCGATGAAGGTCTTCGGATCGTAAAGCACTTTTCGAGGAGATGAGAAAG  
GACAGTATCCTCGGAATAAGTCTCGGCTAACTACGTGCCAGCAGCCGCGGTAACACGTAG  
GAGGCAAGCGTTATCCGGATTTACTGGGCGTAAAGCGTGTGCAGGCGGTTTGGTAAGTTG  
GATGTGAAAGCTCCTGGCTCAACTGGGAGAGGTCGTTCAATACTACCAGACTTGAGAGTG  
GTAGAGGGAGGTGGAATTCCCGGTGTAGTGGTGAATGCGTAGATATCGGGAGGAACACC  
AGTGGCGAAAGCGGCCTCCTGGACCATTTCTGACGCTCAGACACGAAAGCTAGGGGAGCA  
AACGGGATTAGAGACCCCAGTAGTCC

>Otu271

CCAGCCTACGGGGGGCAGCAGTGGGGAATTTTTCGCAATGGGGGAAACCCTGACGCAGCA  
ACGCCGCGTGAGGATGAAGTCCCTTGGGACGTAAACTCCTTTTCGACGGGACGATAATG  
ACGGTACCGGTGGAAGAAGCCCCGGCTAACTCCGTGCCAGCAGCCGCGGTAATACGGGGG  
GGGCAAGCGTTGTTTCGAATTATTGGGCGTAAAGGGCGCGTAGGCGGTGCGGTAAGTCAT  
CTGTGAAATCTTCCGGCTCAACCGGGAGACTGCAGGCGAAACTGCCGTGCTGGAGTGTGG  
GAGAGGTGAGTGGAATTCCCGGTGTAGCGGTGAAATGCGTAGATATCGGGAGGAACACCT  
GTGGCGAAAGCGGCTCACTGGACCACAAGTACGCTGAGGCGCGAAAGCTAGGGGAGCAA  
ACAGGATTAGAAACCCCAGTAGTCC

>Otu272

CCAGCCTACGGGGGGCAGCAGTAAGGAATATTGGTCAATGGGCGGAAGCCTGAACCAGCC  
ATGCCGCGTGACAGGAAGACGGCCCTATGGGTTGTAAACTGCTTTTTCAGGGGAATAAACC  
TACCAATGTATTGGTAGCTGAATGTACTCTGAGAATAAGGATCGGCTAACTCCGTGCCAG  
CAGCCGCGGTAATACGGAGGATCCGAGCGTTATCCGGATTTATTGGGTTTAAAGGGTGCG  
TAGGCGGCCTATTAAGTCAGGGGTGAAAGACGGTAGCTTAAGTATCGCAGTGCCTTTGAT  
ACTGATGGGCTTGAATGTACTTGAGGTAGGCGGAATGTGACAAGTAGCGGTGAAATGCAT  
AGATATGTACAGAACACCAATTGCGAAGGCAGCTTACTAAAGTATGATTGACGCTGAGG  
CACGAAAGCGTGGGGATCAAACAGGATTAGAAACCCGAGTAGTCC

>Otu273

CCAGCCTATGGGACGCTGCAGTCGAGAATATTTCGACAATGGGCGAAAGCCTGATCGAGCG  
ACACCGCGTGACAGGATGAAGGCCTTCGGGTCGTAAACTGCGGTAGCTAGGGAGGAATGCA  
AATGACTGTACCTAGCGGAAAAGAGGTGGGTAAGTACGTGCCAGCACCGGTAACACGT  
AGACCTCAAGCGTTATCCGGATTTATTGGGCGTAAAGCGCGTGTAGGTGGTTCCGTACGT  
TTCTGGTTAAATCCCATTGCCTAACAATGGACCCGCCAGGAATACGGCCGGACTAGAGGA

GGTTAGAGGTGCATAGAACGCACGGTGTAGGGGTGAAATCCGTTGATATCGTGCGGAATA  
CCAAAGGCGAAGGCATTGCACTGGGACCTTCCTGACACTGAGACGCGAAAGCGTGGGGAG  
CAAAAAGGATTAGAAACCCTAGTAGTCC

>Otu274

CCAGCCTACGGGAGGCACCAGTAGGGAATTTTCCACAATGGGGGCAACCCTGATGGAGCA  
ACGCCGCGTGCAGGATGAAGGTCTTCGGATTGTAACTGCTTTTATCTGTGACGAATATG  
ACGGTAGCAGATGAATAAGGATCGGCTAACTCCGTGCCAGCAGCCGCGGTCATACGGAGG  
ATCCAAGCGTTATCCGGAATTACTGGGCGTAAAGAGTTGCGTAGGTGGCATTGTAAGTTG  
GTAGTGAAATCCTGGGGCTCAACCCCTTACCCATTACCAAACTGCAAAGCTAGAGGATG  
AGAGAGGTTATTGGAATTCCTAGTGTAGGAGTGAAATCCGTAGATATTAGGAGGAACACC  
GATGGCGTAGGCAGATAACTGGCTCATTCCTGACACTAAGGCACGAAAGCGTGGGTAGCA  
AACGGGATTAGATACCCCTGTAGTCC

>Otu275

CCAGCCTATGGGTCGCTGCAGTAAGGAATATTGGACAATGGGCGAGAGCCTGATCCAGCC  
ATGCCGCGTGCAGGAAGAAGGACCTATGGTTTGTAACTGCTTTTGAACAAGAGAAAACC  
CATCTACGTGTAGATGGCTGATAGTATTGTTAGATAAAGCATCGGCTAACTTCGTGCCAG  
CAGCCGCGGTAAGACGAAGGATGCAAGCGTTATCCGGATTCATTGGGTTTAAAGGGAGCG  
TAGGCGGATAAATAAGTCAGTGGTGAAATCTCCGGGCTTAACCCGAACTGCCATTGAT  
ACTGTTTATCTAGAGTACATTTGCTGTGGGCGGAATATGACATGTAGTGGTGAAATACTT  
AGATATGTCATAGAACACCGATTGCGAAGGCAGCTCACAAAATGTAAGTACGCTGAGG  
CTCGAAAGTGCGGGGATCAAACAGGATTAGATACCCGTGTAGTCC

>Otu276

CCAGCCTACGGGAGGCTCCAGTAACGAATCTTCCGCAATGCACGAAAGTGTGACGGAGCG  
ACGCCGCGTGTGGGACGAAGCCCTTCGGGGTGTAACCCTGTCAGGGGTTAGAAAGTTC  
TGATCAACCCAGAGGAAGGCACGGCTAACTCTGTGCCAGCAGCCGCGGTAAGACAGAGG  
TGCCAAGCGTTAGGCGGAATCACTGGGCTTAAAGCGTGTGTAGGCGGACTTCTAAGTACC  
TTGTGAAATCCCACGGCTCAACCGTGGAAGTGTGGGTATACTGGGAGTCTTGAGCCATC  
TAGGGGCTGCCGGAACAAATGGTGGAGCGGTGAAATGCGTAGATATCATTTGGAACGCCA  
AAGGTGAAACAGGCAGCTGGGGATGTTCTGACGCTGAGACACGAAAGCCAGGGGAGCGA  
ACGGGATTAGAGACCCCTCGTAGTCC

>Otu277

CCAGCCTACGGGTTGCAGCAGTGGGGAATATTGGACAATGGGCGCAAGCCTGATCCAGCA  
ATGCCGCGTGAGTGAAGAAGGTCTTCGGATTGTAAAGCTCTTTCGACGGGGACGATGATG  
ACGGTACCCGTAGAAGAAGCCCCGGCTAACTTCGTGCCAGCAGCCGCGGTAATACGAAGG  
GGGCTAGCGTTGCTCGGAATGACTGGGCGTAAAGGGCGCGTAGGCGGTGAACACAGTTAG  
GCGTGAAATTCCCGGGCTCAACCTGGGGACTGCGCTTAATACATGTTTCGCTTGAGTTCGG  
AAGAGGGTCGTGGAATTCCCACTGTAGAGGTGAAATTCGTAGATATTGGGAAGAACACCG  
GTGGCGAAGGCGGCGACCTGGTCCGATACTGACGCTGAGGCGCGAAAGCGTGGGGAGCAA  
ACAGGATTAGATACCCTTGTAGTCC

>Otu278

CCAGCCTACGGGGGGCTGCAGTCGAGAATATTCGACAATGGGCGAAAGCCTGATCGAGCG  
ACACCGCGTGCAGGATGAAGGCCCTTCGGGTCGTAACTGCGGTAGTAAGATAACAATGCA  
AATGAGTGTCTTACGGAAGAGGTGGGTAACCTACGTGCCAGCACCAGCGGTAAACGTAG  
ACCTCAAGCGTTATCCGGATTTATTGGGCGTAAAGCGCGTGTAGGTGGCTTCGCGCGTCT  
TCTGTTAAAGATCAGGGCCCAACCCTGAAAGTGCAGGAGATACGGCGGAGCTCGAGGAGG  
TTAGAGGTGCATAGAACGCACGGTGTAGGGGTGAAATCCGTTGATATCGTGCGGAATACC  
AAAGGCGAAGGCAGTGCCTGGGACCTTCCTGACACTGAGACGCGAAAGCGTGGGGAGCA  
AAAAGGATTAGATACCCCTGTAGTCC

>Otu279

CCAGCCTATGGGTGGCTGCAGTGGGGAATCTTGACAATGGGGGCAACCCTGATGCAGCG  
ACGCCGCGTGAGCGATGAAGCCCTTCGGGGTGTAAGCTCTTTCGGTAGGGAAGATAATG  
ACGGTACCTACAGAAGCAGCTGCGGCTAACTACGTGCCAGCAGCCGCGGTAATACGTAGG  
CAGCAAGCGTTGTTTCGGAGTTACTGGGCGTAAAGGGTGTGTAGGCGGCTTCTAAGTTTG  
TTGTGAAATCTCCCGGCTTAACCGGGAGGGTGCGGCGAAGACTGGAAGGCTAGAGTATGG  
GATGGGAGAGTGGAATTCCTGGTGTAGCGGTGAAATGCGTAGATATCAGGAGGAACACCT  
GCGGTGTAGACGGCTCTCTGGACCATTACTGACGCTGAGACACGAAAGCGTGGGTAGCAA  
ACAGGATTAGAAACCCGCGTAGTCC

>Otu280

CCAGCCTATGGGAGGCAGCAGTGGGGAATATTGGACAATGGGCGAAAGCCTGATCCAGCC  
ATGCCGCGTGAGTGAAGAAGGCCCTTCGGGTGTAAAGCTCTTTTCGGCGGGGACGATGATG  
ACGGTACCCGCATAAGAAGCCCCGGCAAACCTTCGTGCCAGCAGCCGCGGTAATACGAAGG  
GGGCTAGCGTTGTTTCGGAATTACTGGGCGTAAAGCGCGCGTAGGCCGGTGATCTTTGTCTAG  
AGGTGAAAGCCCCGGGGCTCAACTCCGGAATTGCCTTTGAAACGGGATTGCTTGAGTCCGA  
GAGAGGATGGCGGAATTCCTAGTGTAGAGGTGAAATTCGTAGATATTAGGAAGAACACCG  
GTGGCGAAGGCGGCCATCTGGCTCGGTACTGACGCTCAGGCGCGAAAGCGTGGGGAGCAA  
ACAGGATTAGATACCCCCGTAGTCC

>Otu281

CCAGCCTATGGGGTGCAGCAGTGGGGAATATTGCACAATGGGCGCAAGCCTGATGCAGCA  
ACGCCGCGTGAGGGACGACGGCCTTCGGGTGTAAACCTCTTTTAGTAGGGAAGAAGCGA  
AAGTGACGGTACCTGCAGAAAAAGCACCGGCTAACTACGTGCCAGCAGCCGCGGTAATAC  
GTAGGGTGCAAGCGTTATCCGGAATTATTGGGCGTAAAGAGCTCGTAGGCCGTTTTGTCTGC  
GTCTGCTGTGAAAACCTGGAGGCTCAACCTCCAGCCTGCAGTGGGTACGGGCAGACTAGAG  
TGCGGTAGGGGAGATTGGAATTCCTGGTGTAGCGGTGGAATGCGCAGATATCAGGAGGAA  
CACCGATGGCGAAGGCAGATCTCTGGGCCGTAACTGACGCTGAGGAGCGAAAGCATGGGG  
AGCGAACAGGATTAGATACCCCTGTAGTCC

>Otu282

CCAGCCTACGGGGGGCAGCAGTGGGGAATATTGGACAATGGGCGCAAGCCTGATCCAGCC  
ATGCCGCGTGATGAAGAAGGCCCTTCGGGTGTAAAGCACTTTAAGCGGGAGGAAGTGA  
TCTGGATTAATAATCTGGATTATTGACGTTACCCGCAGAATAAGCACCGGCTAACTCTGT  
GCCAGCAGCCGCGGTAATACAGAGGGTGCAAGCGTTAATCGGAATTACTGGGCGTAAAGC  
GCGCGTAGGCCGTTGTGCAAGTTGGAGGTGAAATCCCCGGGCTTAACCTGGGCACTGCCT  
TCAAACTGCACGGCTAGAGTATGGGAGAGGAAGGTAGAATTCAGGTGTAGCGGTGAAA  
TGCGTAGAGATCTGGAGGAATACCGATGGCGAAGGCAGCCTTCTGGCCTAATACTGACGC  
TGAGGTGCGAAAGCATGGGGAGCAAACAGGATTAGAGACCCCCGTAGTCC

>Otu283

CCAGCCTATGGGGCGCTCCAGTCGAGAATCTTCCACAATGGGCGAAAGCCTGATGGAGCG  
ACGTTTTCTGTGAATGAAGAAGCCCTTCGGGGTGTAAAGTTCTTTTTTGGGGGAGGAACCCG  
CAAGGGTGACAGTACTCCAAGAATAAGGAGGTCCTAACTCTGTGCCAGCAGGAGCGGTAA  
TACAGAGCCTCCAAGCGTTATCCGGATTTACTGGGCGTAAAGGATTCTAGGTGATTGAG  
TAAGTTAAAAGTTAAACTTATCGGCTCAACCTTTAAGCTGCTTTTAATACTGCTCGAAT  
AGAGGATGTTAGAGGCTAACGGAACCGACGGTGTAGGGGTGAAATCCGTTGATATCGTCG  
GGAACACCAAAAGCGAAGGCAGTTAGCTGGGACAATCCTGACACTGAGGAATGAAAGCGT  
GGGGATCAAAAAGGATTAGATACCCCTGTAGTCC

>Otu284

CCAGCCTACGGGATGCTGCAGTCGAGAATCTTCCACAATGGACGAAAGTCTGATGGAGCG  
ACGCCGCGTGATTGATGAAGTCCTTCGGGATGTAAAGATCTTTTATAGGGGACGAAGTTT  
ATTGACGGTACCCTATGAATAAGGAGTTGCTAAACTCGTGCCAGCAGCAGCGGTAATACG  
AGTGCTCCAAGCGTTATCCGGAATTATTGGGCGTAAAGGGTGTGTAGGCGGTGCGGTTAG  
TCTTCTGTTAAATTCCTTCGGCTTAACCGGGGGCATGCGGAGGAAACGGCGCGACTAGAGG  
ATGCGAGAGGTGAATGGAACCTCATGGAGTAGGGGTGAAATCCGTTGATATCATGGGGAAC  
ACCAAAAGCGAAGGCAATTCCTGAGGCGACTCCTGACGCTGAAACACGAAAGCGTAGGTA  
GCGAATGGGATTAGAAACCCCTGTAGTCC

>Otu285

CCAGCCTACGGGGTGCTGCAGCGGGGAATATTGCACAATGGGCGCAAGCCTGATGCAGCG  
ACGCCGCGTGAGGGATGACGGCCTTCGGGTGTAAACCACTGTCGAAGGGGACGATAATG  
ACGGTACCCTTGAGGAAGCCCCGGCTAACTACGTGCCAGCAGCCGCGGTAAGACGTAGG  
GGGCGAGCGTTATTCGGAATTATTGGGCGTAAAGCGCTCGTAGGCCGGGATCGATAGTCCG  
TGAAGAAAGACCTGGGCTCAACTCAGGGAACGGCACGGATACTTCGATTCTTGAGGCAAT  
CAGAGGGTGATGGAATTCCTGGTGTAGCGGTGAAATGCGTAGATATCGGGAGGAACACCA  
GTGGCGAAGGCGATCACCTGGGGTTGTTCTGACGCTGAGGAGCGAAAGCTAGGGGAGCAA  
ACGGGATTAGATACCCCTGTAGTCC

>Otu286

CCAGCCTACGGGTGGCTCCAGGCGCGAAACCTCCGCAATGCGAGCAATCGCGACGGGGGG  
ACCCCAAGTGCCACTCTTAACGGGGTGGCTTTTCTGAAGTGTAAGAAAGCTTTAGGAATAA  
GGGCTGGGCAAGACCGGTGCCAGCCGCCGCGGTAACACCGGCAGCTCAAGTGGTGGCCAT  
TATTATTGGGCCATAAGCGTTCGTAGCCGGTTTGATAAGTCTCTGGTGAAATCCCGCAGC

TTAACTGTGGGACTTGCTGGAGATACTATCAGACTTGAGGTCGGGAGAGGTTAGGGGTAC  
TCCCAGGGTAGGGGTGAAATCCTATAATCCTGGGAGGACCACCTGTGGCGAAGGCGCCTA  
ACTGGAACGAACCTGACGGTGAGTAACGAAAGCCAGGGGCGCGAACCGGATTAGAAACCC  
TCGTAGTCC

>Otu287

CCAGCCTATGGGGGGCACCAGTGGGGAATTTTGGACAATGGGGGCAACCCTGATCCAGCA  
ATGCCGCGTGTGTGAAGAAGGCCTTCGGGTGTAAAGCACTTTTGTGAGGAACGAAACGG  
ACTGAGTTAATACCTTGGTCTAATGACGGTACCTGAAGAATAAGCACCGGCTAACTACGT  
GCCAGCAGCCGCGGTAATACGTAGGGTGCAAGCGTTAATCGGAATTACTGGGCGTAAAGC  
GTGCGCAGGCGGTTATGTAAGACAGATGTGAAATGCCCGGGCTTAACCTGGGAACTGCAT  
TTGTGACTGCATGGCTAGAATCTGGCAGAGGGGGGTAGAATTCACGTGTAGCAGTGAAA  
TGCGTAGATATGTGGAGGAATACCGATGGCGAAGGCAGCCCCCTGGGCTAAGATTGACGC  
TCATGCACGAAAGCGTGGGGAGCAAACAGGATTAGAAACCCGTGTAGTCC

>Otu288

CCAGCCTATGGGGGGCAGCAGTAAGGAATATTGGTCAATGGACGCAAGTCTGAACCAGCC  
ATGCCGCGTGAAGGATTAAGGTCCTCTGGATTGTAAACTTCTTTTATCTGGGACGAAAAA  
AGGCGATTCTTCGTCACCTTGACGGTACCAGATGAATAAGCACCGGCTAACTCCGTGCCAG  
CAGCCGCGGTAATACGGAGGGTGCAAGCGTTATCCGGATTCACTGGGTTTAAAGGGTGCG  
TAGGCGGGCAGGTAAGTCAGTGGTGAATCCTTGAGCTTAACCTCGAGAACTGCCATTGAT  
ACTATTTGTCTTGAATATTGTGGAGGTAAGCGGAATATGTCATGTAGCGGTGAAATGCTT  
AGATATGACATAGAACACCTATTGCGAAGGCAGCTTACTACGCATATATTGACGCTGAGG  
CACGAAAGCGTGGGGATCAAACAGGATTAGAAACCCCTGTAGTCC

>Otu289

CCAGCCTACGGGTCGCAGCAGTAGGGAATATTGGACAATGGGCGAGAGCCTGATCCAGCC  
ATGCCGCGTGCAGGAAGAAGGCCTTCTGGGTGTAAACTGCTTTTGCCAGGGGATAAAAA  
GTCCCTGCGGGGAAAATTGAAGGTACCTGGTGAATAAGCCACGGCTAACTACGTGCCAGC  
AGCCGCGGTAATACGTAGGTGGCAAGCGTTGTCCGGATTTATTGGGTTTAAAGGGTGCGT  
AGGCGGCCCTGTAAGTCAGTGGTGAATACGGCAGCTCAACTGTGAGGTGCCATTGATA  
CTGCAGGGCTTGAGTACAGACGAGGTAGGCGGAATTGACGGTGTAGCGGTGAAATGCTTA  
GATATCGTCAAGAACACCGATAGCGAAGGCAGCTTACTAGACTGTAAGTACGCTGAGGC  
ACGAAAGTGCGGGGATCAAACAGGATTAGAAACCCGTGTAGTCC

>Otu290

CCAGCCTATGGGATGCTGCAGTGAGGAATATTGCGCAATGCCCCGAAGGGTGACGCAGCG  
ACGCCGCGTGAAGGATGAAGGCCCTCTGGGTGCTAAACTTCTTTTGTGAGGGAATAATCT  
GCCGCTACAGGCGGCATTGAATGTACCTCAGGAAAAAGCATCGGCTAACTACGTGCCAGC  
AGCCGCGGTAATACGTAGGATGCGAGCGTTGTCCGGAATCACTGGGTGTAAAGGGAGCGC  
AGGCTGGTCGGTAAGTCACTGGTGAATTTCCCGGGCTCAACCCGGGGACTGCCAGTGATA  
CTGCTGATCTTGAGTGCAGAAGAGGTTGATGGAATTCTTGGTGTAGCGGTGAAATGCGTA  
GATATCAAGAAGAACACCGATGGCGAAGGCAGTCAACTGGTCTGTAAGTACGCTCATGC  
TCGAAAGCGTGGGGATCAAACAGGATTAGATACCCGTGTAGTCC

>Otu291

CCAGCCTACGGGGGGCAGCAGTAAGGAATATTGGTCAATGGACGCAAGTCTGAACCAGCC  
ATGCCGCGTGGAGGATGAAGGCCCTCTGGGTGTAAACTTCTTTTATCTGGGAAGAAACC  
ACTCTTTTCTAAGGTGTTGACGGTACCAGTTGAATAAGCACCGGCTAACTCCGTGCCAG  
CAGCCGCGGTAATACGGAGGGTGCAAGCGTTATCCGGATTCACTGGGTTTAAAGGGTGCG  
TAGGTGGGCAGGTAAGTCAGTGGTGAATCTCCGGGCTTAACCCGGAACTGCCGTTGAT  
ACTATCTGTCTTGAATGTAGTGGAGGTGAGCGGAATATGTCATGTAGCGGTGAAATGCTT  
AGATATGACATAGAACACCCATTGCGAAGGCAGCTCGCTACACTATTATTGACACTGAGG  
CACGAAAGCGTGGGGATCAAACAGGATTAGAAACCCGAGTAGTCC

>Otu292

CCAGCCTATGGGGCGCTGCAGTCGAGAATCTTCCGCAATGGACGAAAGTCTGACGGAGCG  
ACGCCGCGTGGAGGATGAAGTGCTTCGGCATGTAAACTCCTTTTGCCAGGGAAAAAGTCT  
ATTGATTGTACCTGGAGAATAAGAGGTTGCTAAACTCGTGCCAGCAGCAGCGGTAATACG  
AGTGCCCTCGAGCGTTATCCGGAATCATTGGGCGTAAAGGGTGCGTAGGCGGCATTGTTAG  
TCTCCCGTAAAACTTCCGGCTCAACCGGGAGTCCGCGGGAGAAACGGCATTGCTCGAGA  
TTGGAAGGGGCTCTGGAACCTCATGGTGTAGCGGTGAAATGCGTTGATATCATGGGGAAC  
ACCGAAAGCGAAGGCAGGAGGCTGGTCCATTTCTGACGCTGAAGCACGAAAGCGTGGGT  
CGCAATGGGATTAGAAACCCGAGTAGTCC

>Otu293

CCAGCCTATGGGTGGCTGCAGTCGAGGATCTTCGTCAATGGGCGAAAGCCTGAACGAGCG  
ACGCCGCGTGC GCGATGAAGGCCTTCGGGTGTAAAGCGCGAAAGATGGGACGAAAGCCG  
AAAGTTTTGACCGATCATCAGTAAGCTCGGGCTAAGTTTCGTGCCAGCAGCCGCGGTAAAG  
CGAACCGAGCGAACGTTATTCGGAATCACTGGGCTTAAAGGGCGCGTAGGCGGGCATCAA  
AGTCTGTGGTGAAATCCGGCAGCTTAAGTGTGCAACTGCCGTGGATACTAGGTGTCTCGA  
GGGAGGTAGGGGCGTGC GGAACATTGGTGGAGCGGTGAAATGCGTTGATATCAATAGGA  
ACTCCGGTGGCGAAGGCGGCACGCTGGACCTCATCTGACGCTGAGGCGCGAAAGCTAGGG  
GAGCAAACGGGATTAGAAACCCAGTAGTCC

>Otu294

CCAGCCTATGGGTGGCAGCAGTGAGGAATATTGGGCAATGGGCGAAAGCCTGACCCAGCA  
ACGCCGCGTGGGCGATGAAGATCTGAGGATCGTAAAGCCCTGTTGAGAGGGACGAAACCC  
CGACTTGTCTGGGATTGACGGTACCTTTATAGAAAGCTCCGGCTAACTCCGTGCCAGCAGC  
CGCGGTAATACGGGGGGAGCAAGCGTTGTTCTGGATTTATTGGGCGTAAAGCGCGTGTAGG  
CGGGACAATAAGTCAGAGGTGAAATCTTTAGGCTTAACCTAAAAACTGCCTCTGATACTG  
TTGTTCTTGAGTGCGGAAGAGGGAAGTGAATTCAGGTGTAGCGGTGAAATGCGTAGAT  
ATCTGGAAGAACACCAGTAGCGAAGGCGGCTTCCTGGTCCGCAACTGACGCTGAGACGCG  
AAAGCGTGGGAGCAAACAGGATTAGATAACCCCGTAGTCC

>Otu295

CCAGCCTATGGGTGGCACCCAGTAGGGAATATTGGTTAATGGGCGAAAGCCTGACCCAGCA  
ACGCCGCGTGTGCGATGAAGGCCTTCGGGTGTAAAGCACTTTTGAAGGGGATGAGGAAG  
GACAGTACCCTTCGAATAAGCCTCGGCTAACTACGTGCCAGCAGCCGCGGTAACACGTAG  
GAGGCGAGCGTTATCCGGATTTACTGGGCGTAAAGCGTGTGCAGGCGGTTTGGTAAGTTG  
GATGTGAAAGCTCCTGGCTTAAGTGGGAGAGGTCGTTCAATACTACCAGGCTAGAGGATG  
GGAGAGGGAGGTGGAATTCCGGGTGTAGTGGTGAATGCGTAGATATCCGGAGGAACACC  
AGTGGCGAAAGCGGCCTCCTGGCCATTTCTGACGCTCATACAGAAAGCTAGGGTAGCA  
AACGGGATTAGAAACCCAGTAGTCC

>Otu296

CCAGCCTACGGGTGGCTGCAGTGGGGAATTTTGGACAATGGGCGCAAGCCTGATCCAGCC  
ATGCCGCGTGTGGGAAGAAGGCCTTCGGGTGTAAACCACTTTTGTGAGGGAAGAAACGG  
CTCTTACTAATATTAGGGGCTAATGACGGTACCTGAAGAATAAGCACCGGCTAACTACGT  
GCCAGCAGCCGCGGTAATACGTAGGGTGCAAGCGTTAATCGGAATTACTGGGCGTAAAGC  
GTGCGCAGGCGGCTTTGCAAGACAGATGTGAAATCCCCGGGCTCAACCTGGGAACTGCAT  
TTGTGACTGCATGGCTAGAGTACGGTAGAGGGGGATGGAATTCGCGTGTAGCAGTGAAA  
TGCGTGGATATCGGAAGGAACACCTGTGGCGAAAGCGGCTCACTGGACCATAACTGACGC  
TGAGGCACGAAAGCTAGGGGAGCAAACAGGATTAGAGACCCGTGTAGTCC

>Otu297

CCAGCCTATGGGGCGCACCCAGTCGAGAATAATTCGCAATGGGCGAAAGCCTGACGATGCG  
ACGCCGTGTGAACGATGAAGGCCTTCGGGTGTAAAGTTCTGTGCGCTATGAACAAGGTT  
GCTTCGTGAATAACGAGGTAATTTGAGTGTAATAGGAAAGGAAGCACCGGCTAACTCCGT  
GCCAGCAGCTGCGGTAATACGGAGGGTGCAAGCGTTAGTCGGAATTACTGGGCGTAAAGG  
GTGCGTAGGCGGGGATATAAGTCAGATGTGAAAACTGAAGCTCAACTTCAGCAGTGCAT  
CTGAAACTGTATTTCTAGAGGGATAGCGGAGAAAACGGAATTCACGTGTAGCGGTGAAA  
TGCGTAGATATGTGGAAGAACACCTGTGGCGAAAGCGGTTTTCTAGCTTAAACCTGACGC  
TGAGGCACGAAAGCAAGGGGAGCAAACAGGATTAGATAACCCGAGTAGTCC

>Otu298

CCAGCCTACGGGGTGCTGCAGTAGGGAATCTTGGACAATAGGCGAAAGCCTGATCCAGCA  
ATGCCGCGTGCACGATGAAGGTCTTCGGATTGTAAAGTGCTTTTAGAAGGGATGAGTAAG  
GACAGTACCTTCTGAATAAGCCTCGGCGAACTACGTGCCAGCAGCCGCGGTAAGACGTAG  
GAGGCAAGCGTTATCCGGATTTATTGGGCGTAAAGCGCGTGCAGGCGGTTTGGTAAGTTG  
GATGTGAAATCTCTCGGCTTAACGGGAGAGGTCGTTCAAACTACCAGACTAGAGAATG  
GTAGAGGAAGGTGGAATTCCGGGTGTAGTGGTGAATGCGTAGATATCCGGAGGAACACC  
AGTGGCGAAAGCGGCCTTCTGGACCATTTCTGACGCTAAGATGCGAAAGCTAGGGCAGTA  
AACGGGATTAGAGACCCGAGTAGTCC

>Otu299

CCAGCCTATGGGGGGCAGCAGTTTGGGATATTCCACAATGGGCGAAAGCCTGATGGAGCG  
ACACCGCGTGAAGGATGAAGGTCTTCGGATTGTAAACTTCTTTAGACGCAGATGAAGGTT  
TCAGGGTGAATAATCCTGAAACTTGACAGTATGCGTAGAATAAGCCACGGCTAACTCTGT

GCCAGCAGCCGCGGTAATACAGAGGTGGCAAACGTTGTCCGGATTTATTGGGTGTAAAGG  
GCATGTAGGTGGTTTTGTAAAGTCAAAGGTGAAATGGCCCGGCTCAACCAGGTCATTGCCT  
TTGAAACTGCAGAGCTTGAGTACGGAAGAGGAGAGCGGAATTTCCAGTGTAGCGGTGAAA  
TGCGTAGATATTGGGAGGAACACCGGTGGCGAAAGCGGCTCTCTGGTCCGAAACTGACAC  
TGAGATGCGAAAGCCAGGGGAGCAAACGGGATTAGAAACCCCTCGTAGTCC

>Otu300

CCAGCCTATGGGAGGCTGCAGTGGGGAATCTTGCACAATGGAGGAAACTCTGATGCAGCG  
ACGCCGCGTGAGCGATGAAGCCCTTCGGGGTGTAAGCTCTTTCGACGGGAACGATAATG  
ACGGTACCCGAAGAAGAAGCTGCGGCTAACTACGTGCCAGCAGCCGCGGTAATACGTAGG  
CAGCGAGCGTTGTTTCGGAATTACTGGGCGTAAAGAGTGTGTAGGTGGTGCTCTAAGTTTG  
GTGTGAAATCTCCCGGCTTAACTGGGAGGGTGCGCCGAAAACCTGGAGTGCTTGAGTATGG  
GAGAGGTAAGCGGAATTCCTGGTGTAGCGGTGAAATGCGTAGATATCAGGAGGAACACCT  
GTGGTGTAGACAGCTTACTGGACCATCACTGACACTGAGACACGAAAGCGTGGGTAGCAA  
ACAGGATTAGAAACCCGCGTAGTCC

>Otu301

CCAGCCTACGGGGGGGCTGCAGTGGGGAATATTGCGCAATGGGCGAAAGCCTGACGCAGCG  
ACGCCGCGTGGGGGATGAAGCTTTTCGGAGTGTAACCCCTTTTCGACCCGGACGAATGAC  
CCGCAAGGGTTTGACGGTACGGGTATAAGAAGCCCCGGCTAACTACGTGCCAGCAGCCGC  
GGTAATACGTAGGGGGCCAGCGTTGCTCGGAATTACTGGGCGTAAAGGGTTCGTAGGTGG  
TGCGGCAAGTTGGGAGTGAAATCTCTGGGCTTAACCCAGAGGCTGCTTTCAAACCTGCCG  
TGCTCGAGTGCGAGAGAGGTCACTGGAATTGCAGGTGTAGCGGTGAAATGCGTAGATATC  
TGCAGGAACACCCGTGGCGAAGGCGGCTGACTGGATCGCAACTGACACTGAGGAACGAAA  
GCTAGGGGAGCAAACAGGATTAGATACCCCTCGTAGTCC

>Otu302

CCAGCCTACGGGTCGCTGCAGTCGAGGATATTTAGCAATGGGGGAAACCCTGACTATGTG  
ACGCCGCGTGAGGGATGAAGGTTTTTCGGATCGTAAACCTCTTTCGATGGAGAAGAAGCTC  
AGCCTACTAATATTGGGTTGGGTTGACGGTACCCAGAGAAGAAGCCACGGCCAACCTCCGT  
GCCAGCAGCCGCGGTAATACGGGGGTGGCGAGCGTTACTCGGATTTATTGGGTGTAAAGG  
ACAGGTAGGCGACCTGCCAAGTCAGAAAGTGAAATCCTAAGGCTCAACCTTAGAACTGCTT  
CTGAAACTGGCGGGATTGAGGCTAGGAGAGGAAAGCGGAATTTCCCGGTGTAAGGGTGAAA  
TCTGTAGATATCGGGAGGAACACCAGTGGCGAAAGCGGCTTTCTGGCCTAGATCTGACGC  
TGAAGTGTGAAAGCTAGGGGAGCAAACAGGATTAGAAACCCCTAGTAGTCC

>Otu303

CCAGCCTATGGGGTGCAGCAGACGAGAATATTCGACAATGGGCGAAAGCCTGATCGAGCG  
ACGCCGCGTGGGTTGATGAAGTCCTTCGGGACGTAAAAACCTTTTATGAGGGAGGAAGTAA  
TTGACGTTACCTCATGAATAAGGGGCTCCTAACTCTGTGCCAGCAGGAGCGGTAATACAG  
AGGCCCCAAGCATTATCCGGAATCACTGGGCGTAAAGGGTGTGTAGGCGGTCGTATTAGT  
CTTTCGTGAAAGATCTCGGGCTTAACCCGGGAGACGCGGAGGAAACGGTACGACTTCGAG  
GATGCGAGAGGTATAGGGAACCATGGTGTAGGGGTGAAATCCGTTGATATCATGGGGAA  
CACCAAATGCGAAGGCACTATACTGGCGCACTCCTGACGCTGAAACACGAAAGCGTGGGA  
ATCGAAAAGGATTAGAAACCCCTCGTAGTCC

>Otu304

CCAGCCTACGGGGGGGAGCAGTGGGGAATTTTTCGCAATGGGGGAAACCCTGACGCAGCA  
ACGCCGCGTGAGGATGAAATCCCTTGGGATGTAAACTCCTTTTCGATCGGGAAGATAATG  
ACGGTACCGAGAGAAGAAGCCCCGGCTAACTTCGTGCCAGCAGCCGCGGTAATACGAGGG  
GGGCAAGCGTTGTTTCGGAATTATTGGGCGTAAAGGGTGCCTAGGCGGTTTGACAAGTCAT  
CTGTGAAATCTCTGGGCTCAACCCAGAGTCTGCAGGCGAAACTGTCGGGCTTGAGTATGG  
GAGAGGTGAGTGGAATTTCCGGTGTAGCGGTGAAATGCGTAGATATCGGAAGGAACACCT  
GTGGCGAAAGCGGCTCACTGGACCATAACTGACGCTGATGCACGAAAGCTAGGGGAGCAA  
ACAGGATTAGAAACCCCACTAGTCC

>Otu305

CCAGCCTATGGGACGCACCAGCTAAGAATCTTCTGCAATGGACGAAAGTCTGACAGAGCG  
ACGCCGCGTGAAACGATGAAGGCCGCAAGGTGTAAAGTTCTTTTCTTTGTGAGGAATAAG  
GGGCAAGAGGAAATGCTGTCTTGATGACGTAAGCGAAGGAATAAGCCCCGGCCAATTACGT  
GCCAGCAGCCGCGGTAATACGTATGGGGCGAGCGTTGTTTCGGAATCATTGGGCGTAAAGG  
GCGTGTAGGCGGCTTGGCAAGCTTGGTGTGAAAGGTCACGGCTTAACCGTGAATGTGCGC  
TGAGAACTGCCAGGCTGGAGTTTTTGGGGGGGAAGCTGGAATTCCTGGTGTAGGGGTGAAA  
TCTGTAGATATCAGGAAGAACACCGATGGCGAAGGCAAGCTTCTATCCAAAGACTGACGC

TGAGGCGCGAAAAGTGTGGGGAGCAAACAGGATTAGATACCCCAGTAGTCC

>Otu306

CCAGCCTACGGGTCGCAGCAGTGGGGAATTTTGGACAATGGGCGCAAGCCTGATCCAGCC  
ATGCCGCGTGTCTGAAGAAGGCCTTCGGGTGTAAAGGACTTTTGTTCAGGGAGGAAATCC  
CTAAGGTTAATACCCTTGGGGGATGACAGTACCTGAAGAATAAGCACCGGCTAACTACGT  
GCCAGCAGCCGCGGTAATACGTAGGGTGCAAGCGTTAATCGGAATTACTGGGCGTAAAGC  
GTGCGCAGGCGGTTGTGTAAAGTCTGATGTGAAAGCCCCGGGCTCAACCTGGGAACTGCAT  
TGGAGACTGCACGGCTAGAGTGCCTCAGAGGGGGGTAGAATTCCGCGTGTAGCAGTGAAA  
TGCGTAGAGATGCGGAGGAATACCGATGGCGAAGGCAGCCCCCTGGGATGACACTGACGC  
TCATGCACGAAAAGCGTGGGGAGCAAACAGGATTAGAAACCCTAGTAGTCC

>Otu307

CCAGCCTACGGGGGGCAGCAGTCGAGGATCTTCGTCAATGGGCGCAAGCCTGAACGAGCG  
ACGCCGCGTGCAGCATGAAGGCCTTCGGGTGTAAAGCGCGAAAAGTGGGGACAAAACCGC  
AAGGTTGATCGATCCACAGTAAGGACGGGCTAAGTTTCGTGCCAGCAGCCGCGGTAAGACG  
AACTGTCCTAACGTTGTTTCGGAATCACTGGGCTTAAAGGGCGCGTAGGCGGTTCGGACAAG  
TCGGGGGTGAAAATCCTGCAGCTTAACTGTAGAAGTGCCTTCGATACTGTCCGTCTGGAGG  
GAGATAGGGGTGTGCGGAACCTCCAGTGGAGCGGTGAAATGCGTTGATATTGGAAGGAAC  
GCCGAGGCGAAAAGCGGCGCACTGGATCTCTTCTGACGCTGAGGCGCGAAAAGCTAGGGGA  
GCAAACGGGATTAGAGACCCGCGTAGTCC

>Otu308

CCAGCCTATGGGTGGCAGCAGTGGGGAATCTTTCGCAATGGGGGAAAACCTGACGCAGCG  
ACGCCGCGTGAGTGATGAAGGCCTTCGGGTGTAAAGCTCTGTGGGGAGAGAAGAATTAG  
TGGAGGCTAATCACTCCATGATGACGGTATCTCCTTAGCAAGCACCGGCTAACTCTGTGC  
CAGCAGCCGCGGTAAGACAGAGGGTGCAAACGTTGTTTCGGAATTACTGGGCGTAAAGCGT  
GTGTAGGTGGTCGCGTAAGTCGGATGTGAAAGCCCTGGGCTCAACCCAGGAAGTGCACCTC  
GATACTGCGTGACTTGAGTACCGGAGAGGTTGGTAGAATTCTCGGTGTAGAGGTGAAATT  
CGTAGATATCGAGAGGAATACCTGTGGCGAAGGCGGCCAACTGGACGAGTACTGACACTG  
AGACACGAAAAGCGTGGGGAGCAAACAGGATTAGATACCCCAGTAGTCC

>Otu309

CCAGCCTATGGGGGGCAGCAGTAGGGAATCTTCCACAATGGGCGAAAAGCCTGATGGAGCA  
ACGCCGCGTGAGTGATGAAGGCCTTCGGGTGCTAAACTGCTTTTATCTGTGACGATTATG  
ACGGTAGCAGATGAATAAGGATCGGCTAACTCCGTGCCAGCAGCCGCGGTCATACGGAGG  
ATCCAAGCGTTATCCGGAATTACTGGGCGTAAAGAGTTGCGTAGGTGGCATAAGTAAAGCAA  
ATAGTGAAAGCCTGGGGCTCAACCCCTTACCCATTATTTGAACTGCTAAGCTCGAGGATG  
AGAGAGGTTATTGGAATTCCTAGTGTAGGAGTGAAATCCGTAGATATTAGGAGGAACACC  
GATGGCGTAGGCAGATAACTGGCTCATTCCTGACACTAAGGCACGAAAAGCATGGGGAGCA  
AACGGGATTAGAAACCCTCGTAGTCC

>Otu310

CCAGCCTATGGGGGGCTGCAGTGGGGAATATTGGACAATGGGCGCAAGCCTGATCCAGCA  
ATGCCGCGTGAGTGATGAAGGCCTTAGGGTTGTAAAGCTCTTTCGGCGGGGACGATGATG  
ACGGTACCCGCGAGAAGAAGCCCCGGCTAACTTCGTGCCAGCAGCCGCGGTAATACGAAGG  
GGGCTAGCGTTGTTTCGGAATTACTGGGCGTAAAGGGCGCGTAGGCGGCGAAGCAAGTTAG  
GCGTGAAAGCCCCGGGCTCAACCTGGGAATTGCGCTTGATACTGCTTTGCTTGAGTTCCG  
GAGAGGTGAGTGGAATTCAGTGTAGAGGTGAAATTCGTAGATATTGGGAAGAACACCG  
GTGGCGAAGGCGGCTCACTGGACCGATACTGACGCTGAGGCGCGAAAAGCGTGGGGAGCAA  
ACAGGATTAGAAACCCCAGTAGTCC

>Otu311

CCAGCCTACGGGGGGCAGCAGTGGGGAATCTTTCGCAATGCGCGAAAAGCGTGACGCAGCA  
ACGCCGCGTGGGGGAAGAAGGCTTTCGGGTGTAAACCCCTTTCAGTTGGGACGAAGCTT  
CGCCGGTGAACAGCCGGCTGGAGTGACGGTACCTTCACAAGAAGCACCGGCTAACTACGT  
GCCAGCAGCCGCGGTAATACGTAGGGTGCAAGCGTTGTCCGGAATTATTGGGCGTAAAGA  
GCGTGTAGGCGGCCGATTAGTCCGCTGTGAAAGTCCAGGGCTCAACCTGGAATGCCGG  
TGGATACTGTGCGGCTAGAGTCCGGAAGGGGCGAGTGGAATTCCTGGTGTAGCGGTGAAA  
TGCGCAGATATCAGGAGGAACACCAATGGCGAAGGCAGCTCGCTGGGACGTGACTGACGC  
TGAGACGCGAAAAGCGTGGGGAGCAAACAGGATTAGATACCCCTCGTAGTCC

>Otu312

CCAGCCTATGGGGGGCAGCAGTCGAGAATCTTCGGCAATGGGCGCAAGCCTGACCGAGCG  
ACGCCGCGTGGAGGATGAAGGCCTTCGGGTGTAAACTCCTGTTCAGGGGGAGGAAGGGG

TAACCTTGACCTATCCCTGGAGGAAGCACGGGGCTAAGTTCGTGCCAGCAGCCGCGGTAAG  
ACGAACCGTGCGAACGTTATTTCGGAATCACTGGGCTTAAAGCGCGTGTTAGGCGGATGGGG  
ACGTCGGTAGCTGAAATCCCCCGGCTCAACCGGGGAACTGGCGCCGAAACGCCCCGTCTG  
GAGGGACGTAGGGGGACCTGGAACCTCCGGTGGAGCGGTGAAATGCGTTGAGATCGGAAG  
GAACGCCCGTGGCGAAAGCGAGGTCCTGGACGTTTTCTGACGCTGAGACGCGAAAGCTAG  
GGTAGCGAACGGGATTAGAAACCCGAGTAGTCC

>Otu313

CCAGCCTATGGGGGGCAGCAGTGGGGAATATTGGACAATGGGCGAAAGCCTGATCCAGCA  
ATGCCGCGTGAGTGATGAAGGCCTTAGGGTTGTAAAGCTCTTTCGGGTGGGACGATGATG  
ACGGTACCACCAGAAGAAGCCCCGGCTAACTTCGTGCCAGCAGCCGCGGTAATACGAAGG  
GGGCTAGCGTTGTTTCGGAATTACTGGGCGTAAAGCGCACGCAGGCGGTCCGTTAAATTAG  
AAGTGAAAGCCCTGGGCTCAACCTGGGAATTGCTTTTAAAGACTGGCGGACTTGAATCCAG  
AAGAGGGCAGTGGAATTCCAAGTGTAGAGGTGAAATTCGTAGATATTTGGAAGAACACCA  
GTGGCGAAGGCGACTGCCTGGTCTGGCATTGACGCTCATGTGCGAAAGCGTGGGGAGCAA  
ACAGGATTAGATACCCCAGTAGTCC

>Otu314

CCAGCCTATGGGGTGCAACAGTGGGGAATTTTGGACAATGGGCGCAAGCCTGATCCAGCA  
ATGCCGCGTGTTGAAGAAGGCCTTCGGGTGTAAAGCACTTTTGTCCGGAAGAAATCC  
TTTGGGCTAATACCCTGAGGGGATGACGGTACCGGAAGAATAAGCACCGGCTAACTACGT  
GCCAGCAGCCGCGGTAATACGTAGGGTGCAAGCGTTAATCGGAATTACTGGGCGTAAAGC  
GTGCGCAGGCGGTCCGCTAAGACAGATGTGAAATCCCCGGGCTTAACCTGGGAAGTGCAT  
TTGTGACTGGCGGGCTAGAGTATGGCAGAGGGGGGTAGAATTCACGTGTAGCAGTGAAA  
TGCGTAGAGATGTGGAGGAATACCGATGGCGAAGGCAGCCCCCTGGGCCAATACTGACGC  
TCATGCACGAAAGCGTGGGGAGCAAACAGGATTAGATACCCCTCGTAGTCC

>Otu315

CCAGCCTACGGGGGGCAGCAGTGGGGAATCTTGACAATGGAGGAACTCTGATGCAGCG  
ACGCCGCGTGAGTGATGAAGCCCTTCGGGGTGTAAGCTCTTTCGGCAGGAACGATAATG  
ACGGTACCTGCAGAAGAAGCTGCGGCTAACTACGTGCCAGCAGCCGCGGTAATACGTAGG  
CAGCAAGCGTTGTTTCGGAATTACTGGGCGTAAAGAGTGTGTAGGCGGTTCTCTAAGTTCC  
GTGTGAAATCTCCCGGCTCAACTGGGAGGGTGCGCGGGAACTGGAGGGCTCGAGTATGG  
GAGAGGAAAGCGGAATTCCTGGTGTAGCGGTGAAATGCGTAGATATCAGGAGGAACACCT  
GCGGTGTAGACAGCTTTCTGGACCATCACTGACGCTGAGACACGAAAGCGTGGGTAGCAA  
ACAGGATTAGATACCCCCGTAGTCC

>Otu316

CCAGCCTATGGGGGGCAGCAGTAAGGAATATTGGTCAATGGGCGGAAGCCTGAACCAGCC  
ATGCCGCGTGCAAGGAAGACGGCCCTACGGGTGTAAACTGCTTTTATACGGGAATAAACC  
CCCCAACGTGTTGGGGGCTGAATGTACTGTAAGAATAAGGATCGGCTAACTCCGTGCCAG  
CAGCCGCGGTAATACGGAGGATCCAAGCGTTATCCGGATTTATTGGGTTTAAAGGGTGCG  
TAGGCGGCCTGTTAAGTCAGGGGTGAAAGACGGTAGCTCAACTATCGCAGTGCCCTTGAT  
ACTGACGGGCTTGAATACACTAGAGGTAGGCGGAATGTGACAAGTAGCGGTGAAATGCAT  
AGATATGTACAGAACACCAATTGCGAAGGCAGCTTACTATGGTGTCAATTGACGCTGAGG  
CACGAAAGCGTGGGGATCAAACAGGATTAGATACCCCCGTAGTCC

>Otu318

CCAGCCTATGGGAGGCAGCAGTAGGGAATCTTGCGCAATGGGCGAAAGCCTGACGCAGCA  
ATGCCGCGTGGGGGATGAAGGCCTTCGGGTGTAAACTCCTTTTAGTGGGAACGAAATTG  
ACGGTACCCACAGAAAAGCCCCGGCTAACTACGTGCCAGCAGCCGCGGTGATACGTAGG  
GGGCAAGCGTTGTCCGGATTCCTGGGCGTAAAGAGCTCGTAGGTGGTTTGGTAAGTCGG  
GTGTGAAACCTCCAGGCTCAACCTGGAGACGCCACTCGATACTGCCATGGCTAGAGTCCG  
GTAGGGGACCATGGAATTCCAGGTGTAGCGGTGAAATGCGCAGATATCTGGAGGAACACC  
AGTAGCGAAGGCGGTGGTCTGGGCCGGTACTGACACTGAGGAGCGAAAGCGTGGGGAGCG  
AACAGGATTAGAAACCCCCGTAGTCC

>Otu320

CCAGCCTATGGGGGGCAGCAGTAACGAATCTTCCGCAATGCACGAAAGTGTGACGGAGCG  
ACGCCGCGTGTTGGGACAAAGTTCTTCGGAATGTAAACCACTGTCAGGGGTTAGAAAGTTC  
TGATCAACCCCAAAGGAAGGCACGGCTAACTCTGTGCCAGCAGCCGCGGTAATACAGAGG  
TGCCAAGCGTTAGGCGGAATCACTGGGCTTAAAGCGTGTGTAGGCGGACTTCTAAGTGCC  
TTGTGAAATCCCACGGCTCAACCGTGGAACTGCTGGGTATACTGGGAGTCTTGAGCGACC  
TAGGGGCGAGTGGAACAAATGGTGGAGCGGTGAAATGCGTAGATATCATTTGGAACGCCA



ATGGTGAAAACAACCTCGCTGGGGGTTTGCTGACGCTGAGACACGAAAGCTAGGGGAGCAA  
ACGGGATTAGATACCCCTTGTAGTCC  
>Otu321  
CCAGCCTACGGGGGGCTCCAGTCAAGAACTTCCACAATGGACGAAAGTCTGATGGAGCG  
ACGCCGCGTGGTTGATGAAGTCCTTCGGGACGTAAAAACCTTTTATGAGGGAGGAAGTAA  
TTGACGTTACCTCATGAATAAGGGGCTCCTAACTCTGTGCCAGCAGGAGCGGTAATACAG  
AGGCCCCAAGCATTATCCGGAATCACTGGGCGTAAAGGGTGTGTAGGCGGTCTGTAGT  
CTTTCGTGAAAGCTTTTGGGCTTAACCCAGAAAACGCGGGGGAAACGGCACGACTTAGAG  
GATGCGAGAGGTATATGGAACCTCATGGTGTAGGGGTGAAATCCGTTGATATCATGGGGAA  
CACAAAAGCGAAGGCAATATACTGGCGCACTCCTGACGCTGAGACACGAAAGCGTGGGA  
ATCGAACGGGATTAGAAACCCAGTAGTCC  
>Otu322  
CCAGCCTATGGGGGGCACCAGTGGGGAATCTTGACAATGGGCGAAAGCCTGATGCAGCG  
ACGCCGCGTGGGGGATGAAGCTTTTCGGAGTGTAACCCCTTTTCGACCCGGACGAATGCC  
CCGCAAGGGGACTGACGGTACGGGTATAAGAAGCCCCGGCTAACTACGTGCCAGCAGCCG  
CGGTAAGACGTGGGGGGCCAGCGTTGCTCGGAATTACTGGGTGTAAAGGGTTTCGTAGGCG  
GTGTGGCAAGTCGGGAGTGAAATCTCTGGGCTTAACCCAGAGACTGCTTCCGAAACTGCT  
GTGCTTGAGTGTGGGAGAGGCGCGTGGAATTGCAGGTGTAGCGGTGAAATGCGTAGATAT  
CTGCAGGAACACCCGTGGCGAAAGCGGCGCGCTGGACCACTACTGACGCTGAGGAACGAA  
AGCTAGGGGAGCAAACAGGATTAGAAACCCCTGTAGTCC  
>Otu323  
CCAGCCTATGGGTTCGCAGCAGTGGGGAATCTTGACAATGGGGGAAACCCCTGATGCAGCG  
ACGCCGCGTGAGCGATGAAGCCCTTCGGGGTGTAAGCTCTTTCGGTAGGGAAGATCATG  
ACGGTACCTGCAGAAGCAGCTGCGGCTAACTACGTGCCAGCAGCCGCGGTAATACGTAGG  
CAGCAAGCGTTGTTTCGGAGTTACTGGGCGTAAAGGGTGTGTAGGCGGTTGGATAAGTGTG  
GTGTGAAATCTCCCGGCTTAACCTGGGAGGGTGCGCTACAACTGTTTGACTAGAGTGTGG  
GATGGGAGAGTGGAATTCCTGGTGTAGCGGTGAAATGCGTAGATATCAGGAGGAACACCG  
GTGGTGTAGACGGCTCTCTGGACCATAACTGACGCTGAGACACGAAAGCGTGGGTAGCAA  
ACAGGATTAGAAACCCCTAGTAGTCC  
>Otu324  
CCAGCCTACGGGGGGCAGCAGTCGAGAATTTTTCTCAATGGGCGAAAGCCTGAAGGAGCG  
ACGCCGCGTGGGGGATGAATGGCTTCGGCCCGTAAACCCCTGTCAATTTGTGAACAAATTG  
TTTACCTAACACGTGAAATATTGATTGTAACGGAAGAGGAAGGGACGGCTAACTCTGTG  
CCAGCAGCCGCGGTAATACAGAGGTCCCAAGCGTTGTTTCGGATTCACTGGGCGTAAAGGG  
TGCGTAGGTGGCCAGGTAAGTTTGATGTGAAATCCCGCAGCTTAACCTGCGGAACTGCATT  
GAATACTATCTGGCTAGAGGAATGGAGGGGAGACTGGAATTCTCGGTGTAGCAGTGAAAT  
GCGTAGATATCGAGAGGAACACCAGTGGCGAAGGCGAGTCTCTAGACATTTCTTGACGCT  
GAGGCACGAAAGCCAGGGGAGCAAACGGGATTAGATACCCTGGTAGTCC  
>Otu325  
CCAGCCTATGGGGTGCACCAGTCGAGAATTTTTCAACAATGGACGAAAGTCTGATGGAGCG  
ACGCCGCGTGGAGGATGAAGGTTTTTCGGATTGTAAACTCCTGTCACTGCAGAACAAGGCA  
GTGCGTATGAATAGTACGTGCTGTTGATGGTATGCGGAGAGGAAGGGACGGCTAACTCTG  
TGCCAGCAGCCGCGGTAAGACAGAGGTCCCGAGCGTTGTTTCGGATTCAATTGGGCGTAAAG  
GGTGTGTAGGAGGTGCGGTAAGTCAGGTGTGAAATCTCAGAGCTTAACCTCTGAAACTGCG  
CTTGATACTGCCCGGCTAGAGGATCGGAGGGGGTATCGGAATTTATGGTGTAGCAGTGAA  
ATGCGTAGATATCATAAGGAACACCGGTGGCGAAGGCGGATACCTGGAAGATTCTTGACT  
CTGAAACACGAAAGCCAGGGGAGCAAACGGGATTAGATACCCTTGTAGTCC  
>Otu326  
CCAGCCTATGGGTTGCAGCAGTAAGGAATATTGGTCAATGGGCGAAAGCCTGAACCAGCC  
ATGCCGCGTGGAGGATGAAGGCCCTCTGGGTTGTAAACTCTTTTATCTGGGAAGAAACC  
CGCGATTTCTATTGCGGTTGACGGTACCAGTTGAATAAGCACCGGCTAACTCCGTGCCAG  
CAGCCGCGGTAATACGGAGGGTGCAAGCGTTATCCGGATTCACTGGGTTTAAAGGGTGCG  
TAGGTGGGCAGGTAAAGTCAGTGGTGAATCTCCGAGCTTAACCTCGGAAACTGCCGTTGAT  
ACTATCTGTCTTGAATGTGCTGGAGGCAGGCGGAATATGTCATGTAGCGGTGAAATGCTT  
AGATATGACATAGAACACCAATTGCGAAGGCAGCTTGCTACACGATGATTGACGCTGAGG  
CACGAAAGCGTGGGGATCAAACAGGATTAGAAACCCGAGTAGTCC  
>Otu327  
CCAGCCTATGGGGCGCACCAGTGGGGAATATTGGACAATGGGGGCAACCCTGATCCAGCG

ACGCCGCGTGTGTGAAGAAGGCCTGCGGGTTGTAAAGCACTTTTAGTGGGGATGAAAAGC  
TCAGGGCTAATACCCCCGGGTCTTGACCTAACCTACAGAAAAAGCACCGGCTAACTCTGT  
GCCAGCAGCCGCGTAATACAGAGGGTGCGAGCGTTAATCGGAATTACTGGGCGTAAGC  
GTGCGTAGACGGTTTCGTAAGTCGGATGTGAAATCCCCGGGCTCAACCTGGGAATTGCAT  
TCGAAACTGCAAAGCTAGGGTGCGGAAGAGGGAAGCGGAATTTCCGGTGTAGCGGTGAAA  
TGCGTAGATATCGGAAGGAACATCAGTGGCGAAAGCGGCTTCCTGGTCCAGCACCGACGT  
TCAGGCACGAAAGCGTGGGGAGCAAACAGGATTAGAAACCCGAGTAGTCC

>Otu328

CCAGCCTATGGGGGGCACCAGTAGGGAATCTTGACAAATGGGGGAAACCCTGATCCAGCC  
ATGCCGCGTGAGTGATGAAGGCCTTCGGGTGTAAACTCTTTCGACGGGGACGATAATG  
ACGGTACCCGTAGAAGAAGCTCCGGCTAACTTCGTGCCAGCAGCCGCGGTAATACGAAGG  
GGGCTAGCGTTGTTTCGAATTACTGGGCGTAAAGCGCGCGCAGGCGGCCATTCAAGTCAG  
GGGTGAAAGCCCAGAGCTCAACTCTGGAAGTGCCTTTGAAACTAGACGGCTAGAGTACGG  
GAGAGGTGAGTGGAATTCACAGTGTAGAGGTGAAATTCGTAGATATTGGGAAGAACACCG  
GTGGCGAAGGCGGCTCACTGGCCCGTTACTGACGCTCAGGCGCGACAGCGTGGGGATCAA  
ACAGGATTAGAAACCCTAGTAGTCC

>Otu329

CCAGCCTACGGGGGGCACCAGTAAGGAATATTGGTCAATGGGCGCAAGCCTGAACCAGCC  
ATGCCGCGTGACAGGAAGACGGCCCTACGGGTGTAAACTGCTTTTCAGGGGAATAAACC  
CCCATTTCGTGAATGGGGTTGAATGTACTCTGAGAATAAGGATCGGCTAACTCCGTGCCAG  
CAGCCGCGGTAATACGGAGGATCCGAGCGTTATCCGGATTTATTGGGTTTAAAGGGTGCG  
TAGGCGGCCTTGTAAGTCAGGGGTGAAAGACGGTAGCTTAAGTATCGCAGTGCCTTTGAT  
ACTGCAGGGCTTGAATGTACTTGAGGCAGGCGGAATGTGACAAGTAGCGGTGAAATGCAT  
AGATATGTACAGAACACCAATTGCGAAGGCAGCTTGCTAAAGTATGATTGACGCTGAGG  
CACGAAAGCGTGGGGATCAAACAGGATTAGAGACCCGAGTAGTCC

>Otu330

CCAGCCTATGGGTGGCAGCAGTGGGGAATTTTTCGCAATGGGGGAAACCCTGACGCAGCA  
ACGCCGCGTGAGAGGATGAAGCCCCTTGGGGCGTAAACTCCTTTTCGATCGGGACGATTATG  
ACGGTACCGGAAGAAGAAGCCCCGGCTAACTTCGTGCCAGCAGCCGCGGTAATACGAGGG  
GGGCGAGCGTTGTTTCGAATTATTGGGCGTAAAGGGTGCGTAGGCGGTTTCAGTAAGTCTT  
GTGTGAAATCTTCGGGCTCAACTCGAAGTCTGCATGAGAACTGCTGGGCTTGAGTATGG  
GAGAGGTGAGTGGAATTCACCGGTGTAGCGGTGAAATGCGTAGATATCGGGAGGAACACCT  
GTGGCGAAAGCGGCTCACTGGACCATAACTGACGCTGAGGCACGAAAGCTAGGGGAGCAA  
ACAGGATTAGAGACCCCAGTAGTCC

>Otu331

CCAGCCTATGGGGGGCAGCAGTGGGGAATTTTACGCAATGGGCGAAAGCCTGACGTAGCG  
ACACCGCGTGAGCGAAGAAGCCTTTTGGGGTGTAAGCTCTGTCAGCTGGGAAGAAAAAA  
ATGACGGTACCAGCAGAGGAAGCATCGGCTAACTACGTGCCAGCAGCCGCGGTAAGACGT  
AGGATGCAAGCGTTGTCCGGATTTATTGGGCGTAAAGAGTTCGTAGGCGGTTTGTAAAGT  
CTGATGTTAAATATCGGGGCTCAACCCCGGGACTGCATTGGATACTGGCAGACTTGAGTG  
CGGTAGAGGTAAGTGGAATTTCTGGTGTAGCGGTGAAATGCGTAGATATCAGAAAGAACA  
CCAGTGGCGTAGGCGACTTACTGGGCCGTAACTGACGCTGAGGAACGAAAGCCAGGGGAG  
CGAATGGGATTAGATACCCGCGTAGTCC

>Otu332

CCAGCCTATGGGGGGCAGCAGTGAAGGAATATTGGTCAATGGGCGAAAGCCTGAACCAGCC  
ATCCCGCGTGAAGGAAGAAGGCGCTATGCGTCGTAAACTCTTTTTCAGGGGAAGAAAAAC  
TTCCTATGTATAGGGACTTGCCGGTACCTTGGAATAAGCATCGGCTAACTCCGTGCCAG  
CAGCCGCGGTAATACGGAGGATGCAAGCGTTATCCGGATTCATTGGGTTTAAAGGGTGCG  
TAGGCGGATTAATAAGTCAGTGGTGAAAACCTGCAGCTTAAGTGTAGAGGTGCCATTGAT  
ACTGTTAGTCTTGAGTGTGGTCAAGGTAGGCGGAATGTGTAATGTAGCGGTGAAATGCTT  
AGATATTACACAGAACACCAATTGCGAAGGCAGCTTACTGGGCCATTACTGACGCTGATG  
CACGAAAGCGTGGGGAGCAAACAGGATTAGATACCCCGTAGTCC

>Otu333

CCAGCCTATGGGAGGCTCCAGTAGGGAATCTTGCGCAATGGACGAAAGTCTGACGCAGCA  
ACGCCGCGTGGGGGATGAAGGCCTTCGGGTGTAAACTCCTTTTCAGTGGGAACGAAATTG  
ACGGTACCCACAGAAGAAGCCCCGGCTAACTACGTGCCAGCAGCCGCGGTGATACGTAGG  
GGGCGAGCGTTGTCCGGATTTACTGGGCGTAAAGAGCTCGTAGGCGGCTAAATAAGTCGG  
GTGTGAAACCCCCAGGCTCAACCTGGGAACGCCACTCGATACTGTTTTGGCTAGAGTCCG

GTAGGGGACCATGGAATTCCTGGTGTAGCGGTGAAATGCGCAGATATCAGGAGGAACACC  
AGTAGCGAAGGCGGTGGTCTGGGCCGGTACTGACGCTGAGGAGCGAAAGCGTGGGGAGCG  
AACAGGATTAGATACCCTAGTAGTCC

>Otu334

CCAGCCTATGGGTCGCTGCAGTGGGGAATCTTGACAAATGGGGGCAACCCTGATGCAGCG  
ACGCCGCGTGAGCGATGAAGCCCTTCGGGGTGTAAGCTCTTTCGGCAGGGAAGATTATG  
ACGGTACCTGCAGAAGCAGCTGCGGCTAACTACGTGCCAGCAGCCGCGGTAATACGTAGG  
CAGCAAGCGTTGTTTCGGAGTTACTGGGCGTAAAGGGTGCGTAGGCGGCTCGATAAGTATG  
GTGTGAAATCTCCCGGCTTAACTGGGAGGGTGCGCTATAGACTGCCGGGCTAGAGTGTGG  
GAGAGGAAAGTGGAATTCCTGGTGTAGCGGTGAAATGCGTAGATATCAGGAGGAACACCG  
GTGGTGTAAACGGCTTTCTGGACCATAACTGACGCTGAGGCACGAAAGCGTGGGTAGCAA  
ACAGGATTAGAAACCCGAGTAGTCC

>Otu335

CCAGCCTATGGGGCGCTGCAGTGGGGAATATTGGACAATGGGGCGCAAGCCTGATCCAGCA  
ATGCCGCGTGAATGATGAAGGCCTTAGGGTTGTAAAGTTCTTTCGTCGGGGACGATGATG  
ACGGTACCCGAAGAAGAAGCCCCGGCTAACTTCGTGCCAGCAGCCGCGGTAATACGAAGG  
GGGCTAGCGTTGTTTCGGAATTACTGGGCGTAAAGGGCGCGTAGGCGGCCATTCAAGTTAG  
GCGTGAAAGCCCTGGGCTCAACCTAGGAATTGCGCTTGATACTGTTTGGCTTGAGTTCGG  
GAGAGGTGAGTGGAATTCCTCAGTGTAGAGGTGAAATTCGTAGATATTGGGAAGAACACCA  
GTGGCGAAGGCGGCTCACTGGACCGACACTGACGCTGAGGCGCGAAAGCGTGGGGAGCAA  
ACAGGATTAGATACCCGCGTAGTCC

>Otu336

CCAGCCTATGGGGGGCACCAGTGGGGAATTTTTCGCAATGGGGGAAACCCTGACGCAGCA  
ACGCCGCGTGAGGATGAAGTCTCTTGGGACGTAACTCCTTTTCGATTGGGAAGATAATG  
ACGGTACCAATAGAAGAAGCCCCGGCTAACTTCGTGCCAGCAGCCGCGGTAATACGAGGG  
GGGCAAGCGTTGTTTCGGAATTATTGGGCGTAAAGGGTGCGTAGGCGGTTTGGTAAGTCTT  
GTGTGAAATCTTCGGGCTCAACTCGAAGTCTGCACGAGAACTGCCGGGCTTGAGTGTGG  
GAGAGGTGAGTGGAATTTCCGGTGTAGCGGTGAAATGCGTAGATATCGGAAGGAACACCT  
GTGGCGAAAGCGGCTCACTGGACCATAACTGACGCTGATGCACGAAAGCTAGGGGAGCAA  
ACAGGATTAGATACCCTCGTAGTCC

>Otu337

CCAGCCTATGGGGGGCAGCAGTAAGGGATATTGGGCAATGGGCGAAAGCCTGACCCAGCA  
ACGCCGCGTGAGGATGACGCTCTTCGGATTGTAACTCCTTTTGCCAGGGACGAGGAAG  
GACGGTACCTGGTGAATCAGTCTCGGCTAACTACGTGCCAGCAGCCGCGGTAACACGTAG  
GAGGCGAGCGTTATCCGGATTTACTGGGCGTAAAGGGTGTCAGGCGGGTCCCTAAGTGG  
CGCATGAAAGCTCCGCGCTTAACGTGGAGAGGCTGTGTGACTGAGGCTGAGTGTGG  
CGAGAGGGCTGTGGAATTTCCGGGTGTAGTGGTGAATGCGTAGAGATCCGGAGGAACACC  
AGAGGCGAAGGCGGCAGCCTGGCGCGCAACTGACGCTGAGACACGACAGCATGGGGAGCG  
AACGGGATTAGAAACCCAGTAGTCC

>Otu338

CCAGCCTATGGGTCGCGAGCAGTAACGAATCTTCCGCAATGCACGAAAGTGTGACGGAGCG  
ACGCCGCGTGTTGGGACGAAGTCTTTCGGGATGTAAACCACTGTCAGGGGTACCAAGTTC  
TGAGGAGCCCCAGAGGAAGGGACGGCTAACTCTGTGCCAGCAGCCGCGGTAATACAGAGG  
TCCCAGAGCGTTAGGCGGAATCACTGGGCTTAAAGCGTGTGTAGGCGGATGCCTAAGTACC  
TTGTGAAATCCCACGGCTTAACCGTGGAACTGCTTGGTATACTGGGTGCTTGAGCCACT  
TAGGGGCTACCGGAACAAATGGTGGAGCGGTGAAATGCGTAGATATCATTTGGAACGCCA  
ATGGTGAAAACAGGTAGCTGGGAGTGTGCTGACGCTGAGACACGAAAGCCAGGGGAGCGA  
ACGGGATTAGAAACCCAGTAGTCC

>Otu339

CCAGCCTATGGGTGGCAGCAGTCGAGGATCTTCGGCAATGGGCGCAAGCCTGACCGAGCG  
ACGCCGCGTGGGCGATGAAGGCCTTCGGGTGTAAAGCCCTGTGAGGGGGAGAAAAGAG  
CAATCTTGATCTATCCCTGGAGGAAGCACGGGCTAAGTTCGTGCCAGCAGCCGCGGTAAG  
ACGAACCGTGCGAACGTTATTCGGAATCACTGGGCTTAAAGGGTGCGTAGGCGGGTTGCC  
AAGTCTGTGGTGAAATCCTCCGGCTTAACCGGAGAACTGCCGTGGATACTGGCGACCTCG  
AGGGGGATAGGGGCTTGCGGAACGTGTGCGTGGAGCGGTGAAATGCGTTGATATGCACAGG  
AACTCCGGTGGCGAAGGCGGCGAGCTGGATCCTTTCTGACGCTGAGGCACGAAAGCCAGG  
GGAGCGAACGGGATTAGATACCCCGTAGTCC

>Otu340

CCAGCCTATGGGTGGCAGCAGTGGGGAATATTGGACAATGGGCGCAAGCCTGATCCAGCC  
ATGCCGCGTGAGTGACGAAGGCCTTAGGGTTGTAAAGCTCTTTTCGCAAGCGACGATAATG  
ACGGTAGCTTGAGAAGAAGCCCCGGCTAACTCCGTGCCAGCAGCCGCGGTAAGACGGAGG  
GGGCTAGCGTTGTTTCGGAATTACTGGGCGTAAAGCGCACGTAGGCGGCGTTGCAAGTTGG  
GGTGAAATCCCCGGGGCTCAACCCCGGAATTGCCTCCAAGACTGTGGCGCTGGAGTCCGG  
AAGAGGAGAGCGGAATTTCCAGTGTAGAGGTGAAATTCGTAGATATTGGGAAGAACACCA  
GTGGCGAAGGCGGCTCTCTGGTCCGGTACTGACGCTGAGGTGCGAAAGCGTGGGGAGCAA  
ACAGGATTAGAAACCCGAGTAGTCC

>Otu341

CCAGCCTACGGGTGGCAGCAGTGGGGAATATTGGACAATGGGCGAAAGCCTGATCCAGCA  
ATGCCGCGTGAGTGATGAAGGCCTTAGGGTTGTAAAGCTCTTTTGGCAGGGACGATGATG  
ACGGTACCTGCAGAATAAGCCCCGGCTAACTTCGTGCCAGCAGCCGCGGTAATACGAAGG  
GGGCTAGCGTTGTTTCGAGTTACTGGGCGTAAAGGGCGCGTAGGCGGCCTTGTCAGTCAG  
ATGTGAAAGCCCTGGGCTCAACCCGGGATGTGCATTTGATACTGCAAGGCTAGAGGACGG  
GAGAGGATAGTGGAATTTCCAGTGTAGAGGTGAAATTCGTAGATATTGGGAAGAACACCA  
GTGGCGAAGGCGGCTATCTGGACCGTAACTGACGCTGAGGCGCGAAAGCGTGGGGAGCAA  
ACAGGATTAGAGACCCCGTAGTCC

>Otu342

CCAGCCTACGGGGGGCAGCAGTCGAGAATTTTTCTCAATGGGCGAAAGCCTGAAGGAGCG  
ACGCCGCGTGGGGGATGAAGGGCTTCGGCTCGTAAACCCCTGTCATTTGCGAACAAACCT  
TACGATTGAATAGATCGTGAGCTGATTGTAGCGAAAGAGGAAGGGACGGCTAACTCTGTG  
CCAGCAGCCGCGGTAATACAGAGGTCCCAAGCGTTGTTTCGATTCACTGGGCGTAAAGGG  
TGCGTAGGTGGCAAGGTAAGTTTGATGTGAAATCTCCGGGCTTAACCCGAAACTGCATT  
GAATACTATCTCGCTCGAGAGTTGGAGGGGAGACTGGAATACTTGGTGTAGCAGTGAAAT  
GCGTAGATATCAAGTGGAACACCAGTGGCGAAGGCGAGTCTCTGGACAACCTCTGACACT  
GAGGCACGAAAGCTAGGGGAGCAAACAGGATTAGAAACCCCTAGTAGTCC

>Otu343

CCAGCCTACGGGGGCGCTCCAGGCGCGCAAACTCCACAATGCACATACGTGTGATGGGGGG  
AATCTGAGTGGTTCGACTTCGGTTGACCTTTTGCCAAGTTTAGCAAGCTTGGAGAATAAGT  
GCTGGGTAAGACCGGTGGCAGCCGCCACGGTAATACCGGCGGCACGAGTGGTATTACAA  
TTATTGGGCTTAAAGCGTTAGTAGCCGGCTGAAACAGTCTTGTGTGAAATATTGGCGCAT  
GACGTCAATACGTGCATAAGATACCTTTTCGGCTAGAGAGTGGGAGACGTTAGGAGTATTC  
ATGGGGTAAGGGTAAATCTCGTAATCCTATGAAGACTACCGGTGGCGAAGGCGCCTAAC  
GAGAACACATCTGACGGTGAGTGACGAAGGCTAGGAGAACGAATCGGATTAGATACCCGC  
GTAGTCC

>Otu344

CCAGCCTACGGGGGGCAGCAGTGGGGAATCTTGCGCAATGGGCGAAAGCCTGACGCAGCA  
ACGCCGCGTGGGGGATGAAGCTTTTCGGAGTGTAACCCCTTTTCGACCCGGAAGAATGCC  
CGCAAGGGTTTGACGGTACGGGTATAAGAAGCCCCGGCTAACTACGTGCCAGCAGCCGCG  
GTAAAACGTAGGGGGGCCAGCGTTGCTCGGAATTACTGGGCGTAAAGGGTCCGTAGGCGGT  
GTGGCAAGTCGGAAGTGAAATCTCTGGGCTTAACCCAGAGGCTGCTCCCGAAACTGCTAT  
GCTAGAGTGTGAGAGAGGCGAGTGGAATTGCAGGTGTAGCGGTGAAATGCGTAGATATCT  
GCAGGAACATCCGAGGCGAAAGCGGCTCGCTGGATCACAACCTGACGCTGAGGGACGAAAG  
CTAGGGGAGCAAACAGGATTAGATACCCTCGTAGTCC

>Otu345

CCAGCCTATGGGGGGCAGCAGTGGGGAATATTGGACAATGGGGGAAACCCCTGATCCAGCG  
ACGCCGCGTGTGTGAAGAAGGCCTGCGGGTTGTAAAGCACTTTTAGTGGGGACAAAAAGT  
CACGGGCTAACACCTTGTGATCTTGATTTAACTCACAGAAAAAGCACCGGCTAACTCTGT  
GCCAGCAGCCGCGGTAATACAGAGGGTGCAGCGTTAATCGGAATTACTGGGCGTAAAGC  
GCGCGTAGACGGTTTTGTAAAGTCAGGTGTGAAATCCCCGGGCTCAACCTGGGAACTGCAT  
TTGATACTGCATGGCTAGAGTATCGAAGAGGGAAAGTGAATTTCCGGTGTAGCGGTGAAA  
TGCGTAGATATCGGAAGGAACACCAGTGGCGAAAGCGACTTCCTGGTTCGAATACTGACGT  
TCATGTGCGAAAGCGTGGGGAGCAAACAGGATTAGAAACCCCGTAGTCC

>Otu346

CCAGCCTATGGGGGGCACCAGTGGGGAATTTTGGACAATGGGCGCAAGCCTGATCCAGCA  
ATGCCGCGTGACAGGACGAAGGCCTTCGGGTGTAAACTGCTTTTGTACGGAACGAAACGG  
TCCTTTCTAATACAAGGGGCTAATGACGGTACCGTAAGAATAAGCACCGGCTAACTACGT  
GCCAGCAGCCGCGGTAATACGTAGGGTGCAGCGTTAATCGGAATTACTGGGCGTAAAGC

GTGCGCAGGCGGTGATGTAAGACAGATGTGAAATCCCCGGGCTCAACCTGGGACCTGCAT  
TTGTGACTGCATCGCTAGAGTACGGTAGAGGGGGATGGAATTCGCGCTGTAGCAGTGAAA  
TGCGTAGATATGCGGAGGAACACCGATGGCGAAGGCAATCCCCTGGACCTGTACTGACGC  
TCATGCACGAAAGCGTGGGGAGCAAACAGGATTAGAAACCCCCGTAGTCC

>Otu347

CCAGCCTATGGGGTGCAGCAGTCGAGGATCTTCGGCAATGGGCGCAAGCCTGACCGAGCG  
ACGCCGCGTGCGCGATGAAGGCCTTCGGGTGTAAAGCGCTGTGAGGGGGAGGAAGCCG  
AAAGTTGACCTATCCCTGGAGGAAGCACGGGCTAAGTTCGTGCCAGCAGCCGCGGTAAG  
ACGAACCGTGCGAACGTTGTTTCGGAATCACTGGGCTTAAAGGGCGCGTAGGCGGTTGATC  
AAGTCCGGGGTGAAATCTTTCGGCTTAACCGGAAAAGTGCCTTGATACTGATCAGCTGG  
AGGGAGGTAGGGGAGCTGGAACCTCCAGTGGAGCGGTGAAATGCGTTGATATTGGAAGG  
AACGCCGCTGGCGAAAGCGAGCTGCTGGACCTCTTCTGACGCTGAGGCGCGAAAGCTAGG  
GGAGCAAACGGGATTAGATACCCTAGTAGTCC

>Otu348

CCAGCCTATGGGGTGCAGCAGTCGAGAATTTTTTCAACAATGGGCGAAAGCCTGATGGAGCG  
ACGCCGCGTGGGGGATGAATGGCTTCGGCCCGTAAACCCCTGTCATTTCGGGATCAATGTC  
CCGGCAATAACATTGTTCGGGATTGATAGTACCGGAAGAGGAAGGGACGGCTAACTCTGTG  
CCAGCAGCCGCGGTAATACAGAGGTCCCAAGCGTTGTTTCGATTCACTGGGCGTAAAGGG  
TGCGTAGGTGGTTCGGGTAAGTTTGATGTGAAATCTCCGGGCTTAACCCGGAATGGCATT  
GAATACTATTTCGGCTGGAGGGTTGGAGGGGGGACTGGAATTCTCGGTGTAGCAGTGAAAT  
GCGTAGATATCGAGAGGAACACCAGTGGCGAAGGCGAGTCCCTGGACAACCTCTGACACT  
AAGGCACGAAAGCTAGGGGAGCAAACAGGATTAGATACCCCTGTAGTCC

>Otu349

CCAGCCTACGGGGGGGCTGCAGTGGGGAATATTGGACAATGGGCGCAAGCCTGATCCAGCC  
ATGCCGCGTGAGTGAAGAAGGCCTTAGGGTTGTAAAGCTCTTTCGGCGGGGAAGATAATG  
ACGGTACCCGCGAGAAGAAGCCCCGGCTAACTTCGTGCCAGCAGCCGCGGTAATACGAAGG  
GGGCTAGCGTTGTTTCGGAATCACTGGGCGTAAAGCGCACGCAGGCGGACTGATAAGTCGG  
GGGTGAAAGCCCCGGGGCTCAACCTCGGAACTGCCTTCGATACTGTTAGTCTTGAGTCCGG  
GAGAGGTGAGTGGAATTCCTAGTGTAGAGGTGAAATTCGTAGATATTAGGAAGAACACCA  
GTGGCGAAGGCGACTCACTGGCCCGGTACTGACGCTCAGGTGCGAAAGCGTGGGGAGCAA  
ACAGGATTAGAGACCCCAGTAGTCC

>Otu350

CCAGCCTACGGGAGGCAGCAGTGGGGAATCTTGCACAATGGGGGAAACCCTGATGCAGCG  
ACGCCGCGTGAGCGATGAAGCCCTTCGGGGTGTAAGCTCTTTCGGCAGGGAAGATTATG  
ACGGTACCTGCATAAGCAGCTGCGGCTAACTACGTGCCAGCAGCCGCGGTAATACGTAGG  
CAGCGAGCGTTGTTTCGGAGTTACTGGGCGTAAAGGGTGTGTAGGCGGCTTTTTTAAGTTTG  
GTGTGAAATCTCCCGGCTCAACTGGGAGGGTGCGCCGAATACTGAAGGGCTAGAGTGCGG  
GAGAGGAGAGTGGAATTCCTGGTGTAGCGGTGAAATGCGTAGATATCAGGAGGAACACCG  
GTGGTGTAGACGGCTCTCTGGACCGTAACTGACGCTGAGACACGAAAGCGTGGGTAGCAA  
ACAGGATTAGATACCCTCGTAGTCC

>Otu351

CCAGCCTACGGGGGGGAGCAGTAAGGAATATTGGTCAATGGACGCAAGTCTGAACCAGCC  
ATGCCGCGTGAAAGGATGAAGGCCCTCTGGGTGTAAACTTCTTTTATCTGGGACGAAAAA  
CAGGAATTCTTTTCTGCTCGACGGTACCAGGGGAATAAGCACCGGCTAACTCCGTGCCAG  
CAGCCGCGGTAATACGAGGGTGCAAGCGTTATCCGGATTACTGGGTTTAAAGGGTGCG  
TAGGTGGGTGGTAAGTCAGTGGTGAATCTTCGAGCTTAACTCGGAACTGCCATTGAT  
ACTATCAATCTTGAATTATCTGGAGGTGAGCGGAATATGTCATGTAGCGGTGAAATGCTT  
AGATATGACATAGAACACCCATTGCGAAGGCAGCTCACTACGGATATATTGACACTGAGG  
CACGAAAGCGTGGGGATCAAACAGGATTAGAAACCCCTGTAGTCC

>Otu352

CCAGCCTATGGGGGGCAGCAGTTTCGAATCATTCACAATGGGCGAAAGCCTGATGGTGCG  
ACGCCGCGTGAGGGATGAAGGCCTTCGGGTGTAAACCTCTGTACCCGGGGAAGAAACGC  
TTCAAGTTAACAGCTTGAAGCCTGACTTAACCCGGAGAGGAAGCAGTGGCTAACTCTGTG  
CCAGCAGCCGCGGTAATACAGAGACTGCGAGCGTTATTTCGGATTCACTGGGCGTAAAGGG  
TGCGCAGGTGGCCAAGTGTGTTAGGCGTGAAAGCCCGGGGCTTAACCCCGGAATTGCACC  
TAAAACTACATGGCTAGAGCATTGGAGAGGGGAGCAGAAATTCACGGTGTAGCAGTGAAAT  
GCGTAGATATCGTGAGGAATACCAGAGGCGAAGGCGGCTCCCTGGACAATTGCTGACACT  
CAGGCACGAAAGCGTGGGGAGCAAAGGGATTAGAAACCCCTGTAGTCC

>Otu353

CCAGCCTATGGGGGGCAGCAGTGGGGAATCTTGGACAATGGGGGAAACCCTGATCCAGCC  
ATGCCGCGTGAGTGAAGAAGGCCCTTCGGGTGTAAAGCTCTTTTGTGTCAGGGACGATAATG  
ACGGTACCTGAAGAATAAGCCCCGGCAAACCTTCGTGCCAGCAGCCGCGGTAATACGAAGG  
GGGCTAGCGTTGTTTCGGATTTACTGGGCGTAAAGCGCACGTAGGTGGATTGTTAAGTGAG  
AGGTGAAATCCCAGGGCTCAACCCTGGAACGCTTTTCATACTGGCAATCTAGAGTTCGG  
AAGAGGTGAGTGGAATTCCAAGTGTAGAGGTGAAATTCGTAGATATTTGGAAGAACACCG  
GTGGCGAAGGCGGCTCACTGGTCCGATACTGACACTGAGGTGCGAAAGCGTGGGGAGCAA  
ACAGGATTAGAAACCCTCGTAGTCC

>Otu354

CCAGCCTATGGGGGGCAGCAGCTAAGAATATTCCGCAATGGACGAAAGTCTGACGGAGCG  
ACGCCGCGTGATGACGAAGGCCGAAAGGTGTAAATCCTTTTGTGTTGGGAAGAATAAC  
CATGGGAGGGAATGCCCGTGGGATGACATGAACCGACGAATAAGTCCCGGCTAACTACGT  
GCCAGCAGCCGCGTAACACGTAGGGGACAAGCGTTATTCGGAATTACTGGGCGTAAAGG  
GCATGTAGGCGGCTTTGTAAAGCCTGGCGTGAAAGTCACCGGCTCAACCGGTGGATTGCGT  
CGGGAACCTGCAGAGCTTGAGTCATGGAGAGGAAGGCAGAATTCCTGGTGTAGGGGTGAAA  
TCTGTAGAGATCAGGAAGAATACCAGTGGCGAAGGCGGCCTTCTGGCCAATGACTGACGC  
TGAGGTGCGAAAGTGTGGGGATCAAACAGGATTAGATACCCAGTAGTCC

>Otu355

CCAGCCTACGGGGTGCAGCAGTAGGGAATATTGGGCAATGGGCGAAAGCCTGACCCAGCA  
ACGCCGCGTGTGTGATGAAGGCCCTTCGGGTGCTAAAACACTTTTCTGAGGGATGAGCAAG  
GACAGTACCTCAGGAATAAGTCTCGGCTAACTACGTGCCAGCAGCCGCGGTAACACGTAG  
GAGACGAGCGTTATCCGGATTTACTGGGCGTAAAGCGTGTGCAGGCGGTTCCGGCAAGTTG  
GATGTGAAATCTCCCGGCTCAACTGGGAGGGGTCGTTCAAACTACCGAACTTGAGGGCA  
TCAGAGGAAGGTGGAATTCCCGGTGTAGTGGTGAATGCGTAGATATCCGGAGGAACACC  
AGTGGCGAAGGCGGCCTTCTGGGATGCTCCTGACGCTCATACACGAAAGCTAGGGGAGCG  
AACGGGATTAGAAACCCAGTAGTCC

>Otu356

CCAGCCTACGGGGGGCAGCAGTAGGGAATATTGCACAATGGGCGAAAGCCTGATGCAGCA  
ACGCCGCGTGCGCGAAGAAGGCCCTTCGGGTGCTAAAGCGCTTTTCGGGGAGATGAGGAAG  
GACAGTATCCCCGGAATAAGGCTCGGCTAACTACGTGCCAGCAGCCGCGGTAACACGTAG  
GAGCCAAGCGTTATCCGAATTCCTGAGGCGTAAAGCGCGTGTAGGCGGCTTGATAAGTTG  
GATGTGAAAGCTCCCGGCTCAACTGGGAGAGGACGTTCAATACTGTCAGGCTAGAGGACG  
GCAGAGGGAGGTGGAATTCCCGGTGTAGTGGTGAATGCGTAGATATCCGGAGGAACACC  
AGTGGCGAAGGCGGCCTTCTGGGCCGTTTCTGACGCTCAGACGCGAAAGCTAGGGGAGCA  
AACGGGATTAGAAACCCGCGTAGTCC

>Otu357

CCAGCCTACGGGTCGCTGCAGTAACGAATCTTCCGCAATGCACGCAAGTGTGACGGAGCG  
ACGCCGCGTGTTGGGACGAAGCCCTTCGGGTGCTAAAGCCCTGTCAGAGGATAGAAAGTTC  
TGATCGTCCTCAGAGGAAGGCACGGCTAACTCTGTGCCAGCAGCCGCGGTAAGACAGAGG  
TGCCGAGCGTTAGGCGGAATCACTGGGCTTAAAGCGTGTGTAGGCGGATCGTTAAGTGTC  
TTGTGAAATCCCATGGCTTAACCATGGAACGCTGGACATACTGGCGATCTTGGGTCACC  
TAGGGGCAGCCGGAACAAATGGTGGAGCGGTAATGCGTTGATATCATTTGGAACGCCG  
ATGGCGAAAGCAAGCTGCTGGGGGTGCACCGACGCTGAGACACGAAAGCCAGGGGAGCAA  
ACGGGATTAGATACCCGCGTAGTCC

>Otu358

CCAGCCTACGGGGGGCAGCAGTGAGGAATTTTGCGCAATGGCCGCAAGGCTGACGCAGCA  
ACGCCGCGTGCGTGAAGAAGGCCCTTCGGGTGCTAAAGCCCTGTCAGGTGGGAAGAAGCAGC  
CGGGGGACTAATAGTTTCCCGGATTGACGGTACCACCAAAGGAAGCACCAGGCTAACTCCG  
TGCCAGCAGCCGCGGTAATACGGAGGGTGCAGCGTATTTCGGAATTACTGGGCGTAAAG  
CGCGTGCAGGCGGGCCGGCAAGTCTGATGTGAAAGCCCCGGGCTTAACCTGGGAAGTGCA  
TTGGAAACTGCTGGTCTTGAGTTCTGGAGAGGAAGGGGAATTCCCGGTGTAGAGGTGAA  
ATTCGTAGAGATCGGGAGGAATACCAGTGGCGAAGGCGCCCTTCTGGACGGCAACTGACG  
CTGAGACGCGAAAGCGTGGGGAGCAAACAGGATTAGAAACCCCGGTAGTCC

>Otu359

CCAGCCTACGGGGGGCAGCAGTAAGGAATATTGGTCAATGGAGGCAACTCTGAACCAGCC  
ATGCCGCGTGCGAGGAAGACGGCCCTATGGGTGTAAACTGCTTTTGTACCAGAGAAAACC  
CGAGTACGTGTACTCGGTTGATAGTACGGTAAGAATAAGCATCGGCTAACTTCGTGCCAG

CAGCCGCGGTAAGACGAAGGATGCAAGCGTTATCCGGATTCATTGGGTTTAAAGGGAGCG  
TAGGTGGATTTGTAAGTCAGTGGTGAAATCTCTCAGCTTAACTGAGAACTGCCATTGAT  
ACTGCAGATCTTGAGTACAGATGATGTGGGCGGAATATGACATGTAGTGGTGAAATACTT  
AGATATGTCATAGAACACCGATTGCGAAGGCAGCTCACAAAAGTGTAACTGACACTGAGG  
CTCGAAAGTGCGGGGATCAAACAGGATTAGATACCCCAGTAGTCC

>Otu360

CCAGCCTACGGGGGGCAGCAGCTAAGAATATTCCGCAATGGGCGAAAGCCTGACGGAGCG  
ACGCCGCGTGACGAAGAAGGCCGAAAGGTTGTAAAGTCCTTTTGCTGGGGAAGAATAAG  
GGCGGGAGGGAATGCCCGTCTGATGACGTGAACCGGTGAATAAGCCCCGGCTAACTACGT  
GCCAGCAGCCGCGGTAACACGTAGGGGGCGAGCGTTGTTTCGGAATTATTGGGCGTAAAGG  
GCATGTAGGCGGTTACGTAAGCCCCGGCGTAAAATACCTCAGCTTAACTGAGGGGCTGCGT  
TGGAACCGCGTGACTTGAGTTACCGAGAGGAAACCAGAATTCCAGGTGTAGGGGTGAAA  
TCTGTAGATATCTGGAAGAATACCAGTGGCGAAGGCGGGTTTCTAGCGGATGACTGACGC  
TGAGGTGCGAAAGCGTGGGGAGCAAACAGGATTAGAAACCCCTGTAGTCC

>Otu362

CCAGCCTATGGGGGGCACCAGGCGCGAAACTTTGCAATGCGAGAAATCGTGACAAGGGA  
ACTCCGAGTGCCGTGTAATAATCAGGCTGTCCGCCAGTTTAAACAAGTGGTGAAGAAAGGGC  
CGGGCAAGACCGGTGCCAGCCGCCGCGGTAATACCGGCGGCTCGAGTGGTGGCCACTATT  
ACTGGGCTTAAAGCGTTCGTAGCTGGCTTGTTAAGTCTCTGGGGAAATCTTCCGGCTTAA  
CCGGAAGGCGTCTCAGGGATACTGGCAGGCTAGGGACCGGAAGAGGTGAGAGGTACTTCA  
GGGGTAGGAGTGAAATCCTGTAATCCTTGAGGGGACCACCTGTGGCGAAGGCGTCTCACCA  
GGACGGCTCCGACAGTGAGGAACGAAAGCTGGGGGAGCAAACCGGATTAGAAACCCCTGT  
AGTCC

>Otu364

CCAGCCTATGGGTGGCAGCAGCTAAGAATCTTCCGCAATGGGGGAAACCCTGACGGAGCG  
ACGCCGCGTGATGATGAAGGCCGTAAGGTTGTAAATCCTTTTGTCGGTGAAGAATAAT  
CGAAGGAGTGGAAGCCTTTGAGATGACGTTAGCCGACGAATAAGCCCCGGCTAATTACG  
TGCCAGCAGCCGCGGTAATACGTATGGGGCAAGCGTTGTTTCGGATTTATTGGGCGTAAAG  
GGCGTGTAGGCGGCTCATCAAGTCTGGTGTGAAAATGCAGGGCCTAACTCTGCAAATGCG  
CTGGAAGTGGTGGGCTTGAGTTCTTGAGGGGAAGCTGGAATTCCAGGTGTAGGGGTGAA  
ATCTGTAGATATCTGGAAGAACACCGGTGGCGAAGGCGAGCTTCTATCAGAGGACTGACG  
CTGAGGCGCGAAAGCGTGGGGAGCAAACAGGATTAGATACCCTCGTAGTCC

>Otu365

CCAGCCTACGGGTGGCAGCAGTAACGAATCTTCCGCAATGCACGAAAGTGTGACGGAGCG  
ACGCCGCGTGTTGGGATGAAGTTCTTCGGAATGTAAACCACTGTCAGGGGTTAGAAAGTTC  
TGATCAACCCAGAGGAAGGCACGGCTAACTCTGTGCCAGCAGCCGCGGTAAGACAGAGG  
TGCCAAGCGTTAGGCGGAATCACTGGGCTTAAAGCGTGTGTAGGTGGACTGGTAAGTACT  
TTGTGAAATCCCGCGGCTTAACCGTGGAAGTGGTGGTATACTGCTGGTCTTGAGCCTTC  
TAGGGGTGAGTGAACAAATGGTGGAGCGGTGAAATGCGTAGATATCATTTGGAACGCCA  
ATGGTGAACAACTGACTGGGGAAGTGGTGGTACTGAGACACGAAAGCCAGGGGAGCAA  
ACGGGATTAGAAACCCCTAGTAGTCC

>Otu366

CCAGCCTACGGGTGCGACCAGTGGGGAATATTGGACAATGGGGGAAACCCCTGATCCAGCA  
ATGCCGCGTGAGTGATGAAGGCCTTCGGGTTGTAAAGCTCTTTTGTCAGGGACGATGATG  
ACGGTACCTGCAGAATAAGCCCCGGCTAACTTCGTGCCAGCAGCCGCGGTAATACGAAGG  
GGGCTAGCGTTGTTTCGGAATTACTGGGCGTAAAGCGCACGCAGGCGGCTCGCTAAATTAG  
AAGTGAAAGCCCTGGGCTCAACCCGGGAATTGCTTTTAAGACTGGCGAGCTAGAATCCAG  
AAGAGGGTAGCGGAATTCAGTGTAGAGGTGAAATTCGTAGATATTGGGAAGAACACCG  
GTGGCGAAGGCGGCTACCTGGTCTGGTATTGACGCTCAGGTGCGAAAGCGTGGGGAGCAA  
ACAGGATTAGATACCCTTGTAGTCC

>Otu367

CCAGCCTACGGGAGGCAGCAGTAGGGAATCTTGCGCAATGGGCGAAAGCCTGACGCAGCA  
ACGCCGCGTGGGGGATGAAGGCCTTCGGGTTGTAAACTCCTTTTAGTGGGAACGAAATTG  
ACGGTACCCACAGAAAAAGCCCCGGCTAACTACGTGCCAGCAGCCGCGGTGATACGTAGG  
GGGCGAGCGTTGTCCGATTTACTGGGCGTAAAGAGCTCGTAGGCGGTTTAGTAAGTCGG  
GTGTGAAACCTCTAGGCTTAACCTAGAGACGCCACTCGAACTACTATGACTAGAGTCTG  
GTAGGGGACCATGGAATTCCTGGTGTAGCGGTGAAATGCGCAGATATCAGGAGGAACACC  
AGTAGCGAAGGCGGTGGTCTGGGCCAGTACTGACGCTGAGGAGCGAAAGCGTGGGGAGCG

AACAGGATTAGAAACCCCCGTAGTCC

>Otu368

CCAGCCTACGGGTGGCAGCAGTAAGGAATATTGGTCAATGGAGGCAACTCTGAACCAGCC  
ATGCCGCGTGAACGATGAAGGCGCTATGCGTCGTAAAGTCTTTTGTACGAGAAAAAAC  
TATCTACGTGTAGATAGCTGATGGTATCGTAAGAATAAGGATCGGCTAACTCCGTGCCAG  
CAGCCGCGGTAATACGGAGGATCCAAGCGTTATCCGGATTCATTGGGTTTAAAGGGTGCG  
TAGGCGGCTTATTAAGTCAGCGGTGAAATCCTGGGGCTTAACCCAGAACTGCCATTGAT  
ACTGATGAGCTTGAGTACACTTGAAGTGGGCGGAATGTGTCTGTAGCGGTGAAATGCTT  
AGATATGACACAGAACACCGATTGCGAAGGCAGCTCACTAAATTGTCACTGACGCTGAGG  
CACGAAAGCGTGGGGATCAAACAGGATTAGATACCCCAGTAGTCC

>Otu369

CCAGCCTACGGGGGGCTCCAGTGGGGAATTTTGGACAATGGGGGCAACCCTGATCCAGCA  
ATGCCGCGTGTGTGAAGAAGGCCTTCGGGTGTAAAGCACTTTTGTCCGGAAAGAAATCA  
TCCTGGTTAATACCTGGGGTGGATGACGGTACCGGAAGAATAAGCACCGGCTAACTACGT  
GCCAGCAGCCGCGTAATACGTAGGGTGCAAGCGTTAATCGGAATTACTGGGCGTAAAGC  
GTGCGCAGGCGGTTTCGCTAAGACAGATGTGAAATCCCCGGGCTTAACCTGGGAAGTGCAT  
TTGTGACTGGCGGGCTAGAGTATGGCAGAGGGGGGTAGAATTCCACGTGTAGCAGTGAAA  
TGCGTAGAGATGTGGAGGAATACCGATGGCGAAGGCAGCCCCCTGGGCCAATACTGACGC  
TCATGCACGAAAGCGTGGGGAGCAAACAGGATTAGAAACCCCAGTAGTCC

>Otu370

CCAGCCTACGGGGCGCAGCAGTAAGGGATATTGCGCAATGGGCGAAAGCCTGACGCAGCA  
ACGCCGCGTGGAGGATGACGGCCTTCGGGTGTAAACTCCTTTTGGCCCGGACGAGGAAG  
GACGGTACGGGTGAAGAAGTCACGGCTAACTACGTGCCAGCAGCCGCGGTAAAACGTAG  
GTGGCAAGCGTTATCCGGATTTACTGGGCGTAAAGCGTGTGCAGGCGGTGGTTCAAGTGG  
TGTATGAAATCGCCCGGCTTAACCGGGCGGGGTATGCCAGACTGGGCCACTCGAGTGCG  
GGAGAGGGGCGTGGAATTCCGGGTGTAGTGGTGAAATGCGTAGAGATCCGGAGGAACCCC  
AGAGGCGAAGGCGGCGCCCTGGCCGACACTGACGCTCAGACACGACAGCATGGGGAGCG  
AACGGGATTAGAAACCCCTCGTAGTCC

>Otu371

CCAGCCTACGGGTTCAGCAGTGGGGAATATTGCACAATGGGCGAAAGCCTGATGCAGCA  
ACGCCGCGTGAGTGATGAAGGCCTTCGGGTGTAAAGCTCTGTCTTTGGGGACGATAATG  
ACGGTACCCAAGGAGGAAGCCACGGCTAACTACGTGCCAGCAGCCGCGGTAAATACGTAGG  
TGCGGAGCGTTATCCGGAATTATTGGGCGTAAAGAATGCGTAGGTGGACTTTTAAGTCAG  
ATGTGAAATCCCCGGGCTTAACCCGGGAGCTGCATTTGAAACTGGAAGCCTGGAGTGCAG  
GAGAGGTAAGTGGAATTCCAAGTGTAGCGGTGAAATGCGTAGATATTTGGAAGAACATCG  
GTGGCGAAGGCGACTTACTGGACTGTTACTGACACTGAGGCATGAAAGCGTGGGGAGCAA  
ACAGGATTAGAAACCCCGGTAGTCC

>Otu372

CCAGCCTATGGGGGGCAGCAGTAGGGAATCTTGACAATGGACGAAAGTCTGATGCAGCG  
ACGCCGCGTGAGTGATGAAGGCCTTCGGGTGTAAAGCTCTGTTCTCAGGGAATAAAAAA  
ATGAAGGTACCTGAGGAGAAAGGACCGGCTAACTTCGTGCCAGCAGCCGCGGTAATACGA  
GGGGTCCAAGCGTTGCTCGGAATCATTGGGCGTAAAGCGGGTGTAGGTGGCTTTGTAAAGT  
CGGGAGTGAAAGCCCTGGGCTTAACCCAGGAAGTGCTTTGATACTGCGAAGCTTGAGTG  
TGGGAGAGGATCGTGGAATTCAGGTGTAGTGGTGAAATACGTAGATATCTGGAGGAACA  
CCGGTGGCGAAGGCGGCGATCTGGCCCAACACTGACACTCAGACCCGAAAGTGCGGGGAT  
CAAACAGGATTAGAAACCCCGGTAGTCC

>Otu373

CCAGCCTATGGGGCGCTGCAGTCGAGAATATTCCACAATGGACGAAAGTCTGATGGAGCG  
ACGCCGCGTGACAGGATGAAGGTATTTCGTATCGTAAACTGCTTTTTTCAGGGATGAATTC  
GATGACAGTACCTGGAGAATAAGAGGTTACTAACTCTGTGCCAGCAGTAGCGGTAATACA  
GAGACCTCAAGCGTTATCCGGATTTATTGGGCGTAAAGAGCTGGTAGGTGGTCATATTAG  
TCAGATGTCAAACTTCGAGCTCAACTCGAAAAGTGCATTTGAAACGGTATGACTAGAGG  
GTGTGAGAGATCACTGGAACCTCATGGTGTAGCAGTGAAATGCGTTGATATCATGAGGAAC  
ACCAAAGGCGAAGGCATGTGATTGGCACACTCCTGACACTGAGCAGCGAAAGCGTGGGTA  
GCGAATGGGATTAGATACCCCAGTAGTCC

>Otu374

CCAGCCTATGGGATGCACCAGTGAGGAATATTGGTCAATGGACGCAAGTCTGAACCAGCC  
ATGCCGCGTGAAGGATGAAGGCCTTCTGGGTGTAAACTTCTTTTACCTGGGAAGAAACC



ACTGTTTTCTAACAGTGTTGACGGTACCAGAGGAATAAGCACCGGCTAACTCCGTGCCAG  
CAGCCGCGGTAATACGGAGGGTGCAAGCGTTATCCGGATTTACTGGGTTTAAAGGGTGTG  
TAGGCGGGCTTTTAAGTCAGTGGTGAAATCTCCGGGCTCAACCTGGAAACTGCCATTGAT  
ACTATTAGTCTTGAATTTTGTGAGGTAGGCGGAATAAGTCATGTAGCGGTGAAATGCAT  
AGATATGACTTAGAACACCAATTGCGAAGGCAGCTTGCTAAACAAATATTGACGCTGAGG  
CACGAAAGCGTGGGGATCAAACAGGATTAGATACCCCAGTAGTCC

>Otu375

CCAGCCTATGGGGGGCAGCAGTGGGGAATTTTGGACAATGGGGGCAACCCTGATCCAGCA  
ATGCCGCGTGAGTGAAGAAGGCCTTCGGGTGTAAAGCTCTTTTGTGAGGGAAGAAACGG  
TGGTCTCTAATATAGGCTGCTAATGACGGTACCTGAAGAATAAGCACCGGCTAACTACGT  
GCCAGCAGCCGCGGTAATACGTAGGGTGCAAGCGTTAATCGGAATTACTGGGCGTAAAGC  
GTGCGCAGGCGGTTATATAAGTCAGATGTGAAATCCCCGGGCTCAACCTGGGAACTGCAT  
TTGAGACTGTATGGCTAGAGTGTGTGAGAGGGGGGTAGAATTCCACGTGTAGCAGTGAAA  
TGCGTAGATATGTGGAGGAATACCGATGGCGAAGGCAGCCCCCTGGGATAACACTGACGC  
TCATGCACGAAAGCGTGGGGAGCAAACAGGATTAGAAACCCGAGTAGTCC

>Otu376

CCAGCCTATGGGGCGCTGCAGTGGGGAATTTTGGACAATGGGGGCAACCCTGATCCAGCC  
ATGCCGCGTGAGTGAAGAAGGCCTTCGGGTGTAAAGCTCTTTCAGCCGGAAGAAATCG  
CATCAGTTAATACCTGGTGTGGATGACGGTACCGGAATAAGAAGCACCGGCTAACTACGT  
GCCAGCAGCCGCGGTAATACGTAGGGTGCGAGCGTTAATCGGAATTACTGGGCGTAAAGC  
GTGCGCAGGCGGTTTGTAAAGATAGGCGTGAAATCCCCGGGCTCAACCTGGGAACTGCGT  
TTATGACTGGCAGGCTAGAGTATGGCAGAGGGGGGTGGAATTCACGTGTAGCAGTGAAA  
TGCGTAGAGATGTGGAGGAACACCGATGGCGAAGGCAGCCCCCTGGGCCAATACTGACGC  
TCATGCACGAAAGCGTGGGTAGCAAACAGGATTAGATACCCCTGTAGTCC

>Otu377

CCAGCCTACGGGGGGCTGCAGTCGAGAATCTTCGGCAATGGGCGCAAGCCTGACCGAGCG  
ACGCCGCGTGGGGGATGAAGGATTTTCGGTTCGTAAACCTCTTTTGGCAGGGAAGAAAAAG  
TTGCATCTAACAGATGCAAAACTGACGGTACCTGCAGAAATAAGCCACGGCTAACTCCGTG  
CCAGCAGCCGCGGTAATACGGAGGCCCGAGCGTTGTTTCGGAATTACTGGGCTTAAAGCG  
CGTGTAGGCGGGCTGGTAAGTGTCTTGTGAAATCCCCGGGCTCGACCCGGAATTGCTCG  
GCATACTGCCGTCTTGAGGCAGGTATGGGTCACTGGAACCTTAGGTGTAGCGGTGAAAT  
GCGTAGATATCTAAGGGAACGCCGGTGGCGAAAGCGGGTGACTGGGCCTGTCCTGACGCT  
GAGACGCGAAAGCGTAGGGAGCAAACGGGATTAGATACCCCCGTAGTCC

>Otu378

CCAGCCTACGGGGTGCTGCAGTCGAGGATCTTTGGCAATGAGCGCAAGCTTGACCAAGCG  
ACGCCGCGTGTGCGATGAAGGCCTTCGGGTGTAAAGCACTGTGAGGGGGACGAAAGCC  
GAAAGGTTTGACCGATCCCTGGAGGAAGCACGGGCTAAGTTCGTGCCAGCAGCCGCGGTA  
AGACGAACCGTGCGAACGTTGTTTCGGAATCACTGGGCTTAAAGGGCGCGTAGGCGGCCCA  
TCAAGTCAGGGGTGAAATCCTCCAGCTTAACTGGAGAAGTGCCTTTGATACTGGTGGGCT  
CGAGGGAGGTAGGGGCATGTGGAACCTTCTGGTGGAGCGGTGAAATGCGTTGATATCAGAA  
GGAACGCCGGTGGCGAAAGCGACGTGCTGGACCTCTTCTGACGCTGAGGCGCGAAAGCTA  
GGGGAGCAAACGGGATTAGAAACCCCAGTAGTCC

>Otu379

CCAGCCTATGGGGGGCAGCAGTGGGGAATTTTGGACAATGGGCGCAAGCCTGATCCAGCA  
ATGCCGCGTGACAGGATGAAGGCCTTCGGGTGTAAACTGCTTTTGTACGGAACGAAACGG  
CGAGCTCTAATACAGTTTGCTAATGACGGTACCGTAAGAATAAGCACCGGCTAACTACGT  
GCCAGCAGCCGCGGTAATACGTAGGGTGCAAGCGTTAATCGGAATTACTGGGCGTAAAGC  
GTGCGCAGGCGGTTATATAAGACAGATGTGAAATCCCCGGGCTCAACCTGGGACCTGCAT  
TTGTGACTGTATAGCTAGAGTACGGCAGAGGGGGATGGAATTCGCGGTGTAGCAGTGAAA  
TGCGTAGATATGCGGAGGAACACCGATGGCGAAGGCAATCCCCTGGGCCTGTACTGACGC  
TCATGCACGAAAGCGTGGGGAGCAAACAGGATTAGATACCCCCGTAGTCC

>Otu380

CCAGCCTACGGGGTGCTGCAGGCGCGAAACCTTTACAATGCACGAAAGTGTGATAGGGGG  
ATACTCAGTGCTTACGATTATGTCGTAGGCTTTTGTGATCGTAAATAGATTGGTGAATA  
AGTGGTGGGTAAGACCGGTGCCAGCCGCCGCGGTAACCCCGGCGCCACGAGTGGTCAATCA  
CGATTATTGGGCCTAAAGCGTTTCGTAGCCGGTTTGGTAAATCTCTTGTGAAATTGTTTCGG  
CTTAACCGGACAGCGTGACAGGAGACACTACCAGACTCGAGACCGGGAGGCGCAAGAAAGTA  
TGGCATGGGGACTGGTAAAATGGGATAATCCATGCTAGACTACCGATGGCGAAGGCATCT

TGCGAGAACGGATCTGACGGTGAGGAACGAAAGCTAGGGGAGCGAACCGGATTAGAAAACCTAGTAGTCC

>Otu381

CCAGCCTATGGGTTGCTGTCAGTCGAGAATTTTTTCACAATGGGCGCAAGCCTGATGGAGCGACGCCGCGTGGGGGATGAATGGCTTCGGCCCGTAAACCCCTGTCATTTGCGATCAACCGTTATTTGTTTAAGAGATGATAACCTGATAGTAGCGAAAGAGGAAGGGACGGCTAACTCTGTGCCAGCAGCCGCGGTAATACAGAGGTCCCAAGCGTTGTTTCGGATTCACTGGGCGTAAAGGGTGCGTAGGTGGCGAGGTAAGTCGGATGTGAAAGCTCGGAGCTCAACTCCGAAATGGCATTGGAACTACCTTGCTCGAGGATTGGAGGGGGGACTGGAATACTTGGTGTAGCAGTGAAATGCGTAGATATCAAGTGGAACACCAGTGGCGAAGGCGAGTCCCTGGACAACCTCTGACACTGAGGCACGAAAGCTAGGGGAGCAAACAGGATTAGATACCCGAGTAGTCC

>Otu382

CCAGCCTATGGGTGGCAGCAGTGGGGAATCTTGCGCAATGGGCGAAAGCCTGACGCAGCGACGCCGCGTGAGCGATGAAGGCCCTTCGGGTTGTAAAGCTCTGTGGGGAGGGAAGAATAAGGTTTGGCTAATATCCAACTGATGACGGTACCTCCTTAGCAAGCACCGGCTAACTCTGTGCCAGCAGCCGCGGTAAGACAGAGGGTGCAAACGTTGTTTCGGAATTACTGGGCGTAAAGCGCGTGTAGGCGGCTAAGTAAGTCGGGCGTGAAATCCACGGCTCAACCGTGGAAGTGCACTCGAAACTGCATAGCTAGAGTCTTGAGAGGAAGGTGGAATGCTTGGTGTAGAGGTGAAATTCGTAGATATCAAGCGGAACACCGGTGGCGAAGGCGGCCCTCTGGACAGTGAAGTGCCTGACGCTGAGACGCGAAAGCGTGGGGAGCAAACAGGATTAGAAACCCCCGTAGTCC

>Otu383

CCAGCCTATGGGAGGCAGCAGTCGAGAATTTTTTCACAATGGGGGAAACCCCTGATGGAGCGACGCCGCGTGGGGGATGAATGGCTTCGGCCCGTAAACCCCTGTCATTTGTGACTAAACCTTGCCATTTAACAGACGGCAAGCTGATTGTAGCAGAAGAGGAAGGGACGGCTAACTCTGTGCCAGCAGCCGCGGTAATACAGAGGTCCCAAGCGTTGTTTCGGATTCACTGGGCGTAAAGGGTGCGTAGGTGGTTGGATAAGTTTGATGTGAAATCTCGGAGCTTAACTCCGAAACTGCATTGAATACTATCCGGCTTGAGGGTCGGAGGGGGGACTGGAATTCTCGGTGTAGCAGTGAAATGCGTAGATATCGAGAGGAACACCAGTGGCGAAGGCGAGTCCCTGGACGACTCCTGACACTGAGGCACGAAAGCTAGGGGAGCAAACAGGATTAGATACCCGAGTAGTCC

>Otu384

CCAGCCTATGGGGGGCTGTCAGTGGGGAATATTGGACAATGGGGGCAACCCTGATCCAGCAATGCCGCGTGTGTGAAGAAGGTCTTCGGATTGTAAAGCACTTTTGGCAGGGACGATGATGACGGTACCTGCAGAATAAGCCCCGGCTAACTTCGTGCCAGCAGCCGCGGTAATACGAAGGGGCTAGCGTTGCTCGGAATGACTGGGCGTAAAGGGCGCGTAGGCGGTTTATACAGTCAGATGTGAAATTCCTGGGCTCAACCTGGGGACTGCATTTGAGACGTGTAGACTTGAGTGGAGAAGAGGGTTGTGGAATTTCCAGTGTAGAGGTGAAATTCGTAGATATTGGAAGAACACCGGTGGCGAAGGCGGCAACCTGGTCTTCAACTGACGCTGAGGCGCGAAAGCGTGGGGAGCAAACAGGATTAGATACCCCTGTAGTCC

>Otu385

CCAGCCTACGGGTGGCTCCAGTAACGAATCTTCCGCAATGCACGAAAGTGTGACGGAGCGACGCCGCGTGAGGAGACGAAGTTCTTCGGAATGTAACTTCTGTGAGGGGATACCAAGTCTTGAGGATCCCCAGAGGAAGGGGCGACTAACTCTGTGCCAGCAGTCGCGGTAAGACAGAGGCCCGAGCGTTAGGCGGAATCACTGGGCTTAAAGCGCGTGTAGGCGGAGGGCTAAGTACCTTGTGAAATCCCCGGGCTCAACCCGGGAACCTGCTGGGTATACTGGTCTTCTTGAGGCATCTAGGGGCGAGCGGAACAAACGGTGGAGCGGTGAAATGCGTAGATATCGTTTGAACGCCAATGGTGAAAACAGCTCGCTGGGGATGTCCTGACGCTGAGACGCGAAAGCCAGGGGAGCAAACGGGATTAGATACCCCTGTAGTCC

>Otu386

CCAGCCTATGGGTTGCTCCAGTCGAGAATTTTTTCTCAATGGGGGCAACCCTGAAGGAGCGACGCCGCGTGAGAGGATGAAGGTCTTCGGATTGTAACTCCTGTCATTGGTGAACAAAGCCGCGGTTAACTGCGATGCGGTTTGATAGTAGCCGAAGAGGAAGAGACGGCTAACTCTGTGCCAGCAGCCGCGGTAATACAGAGGTCTCAAGCGTTGTTTCGGATTCACTGGGCGTAAAGGGTGCGTAGGCGGCGGGGCAAGTCTGATGTGAAATCCCGGGGCTCAACCCTGGAAGTGCATTGGATACTGCCTTGCTAGAGTACTGGAGAGGAACTGGAATTTACGGTGTAGCAGTGAAATGCGTAGAGATCGTAAGGAAGGCCAGTGGCGAAGGCGAGTTTCTGGACAGTTACTGACGCTGAGGCACGAAGGCCAGGGGAGCAAACGGGATTAGATACCCGAGTAGTCC

>Otu387

CCAGCCTATGGGGGGCAGCAGTGAGGAATATTGCGCAATGCCCCGAAAGGGTGACGCAGCG

ACGCCGCGTGGAGGATGAAGGCCCTACGGGTCGTAAACTCCTTTTATGAGGGAATAATTT  
CTCGCTATAGGCGAGATTGAATGTACCTCAAGAAAAGCATCGGCTAACTACGTGCCAGC  
AGCCGCGGTAATACGTAGGATGCTAGCGTTGTCCGGATTTACTGGGTGTAAAGGGAGCGC  
AGGCGGGTTGTAAGTCGGTGGTGAAATTTTCGGGCTTAACCCGAAAAGTGCATCGATA  
CTGCTAATCTTGAGTGCAGAAGAGGTTGATGGAATTCTAGGTGTAGCGGTGAAATGCGTA  
GATATCTAGAAGAACCCGATGGCGAAGGCAGTCAACTGGTCTGCTACTGACGCTCATGC  
TCGAAAGCGTGGGGATCAAACAGGATTAGAAACCCGCGTAGTCC

>Otu388

CCAGCCTACGGGTGGCTGCAGTGAGGAATATTGCTCAATGGGCGAAAGCCTGAAGCAGCG  
ACGCCGCGTGAAGGATGAAATCCGTTAGGATGTAAACTTCTTTTTCGGGGGATGAATGTT  
CCGGTTTCCGGAATTGACCGTACCCCGTGAATAAGCACCGGCCAACTACGTGCCAGCAGC  
CGCGGTAATACGTAGGGTGCAAGCGTTGTCCGGAATTACTGGGTGTAAAGGGTCCGCAGG  
CGGGCGAACAAGTCGGTGGTGAAATCTTGTGGCTCAACCACAAAAGTGCCTCCGATACTG  
TTTGTCTTGAGTTCGAGAGAGGATGATGGAATTCATGGTGTAGCGGTGAAATGCGTAGAG  
ATCATGAAGAACCCGGTAGCGAAGGCGGTCTCTGGCTCGATACTGACGCTCAGGGACG  
AAAGCGTGGGTAGCAAACAGGATTAGATACCCAGTAGTCC

>Otu389

CCAGCCTACGGGAGGCAGCAGTAACGAATCTTCCACAATGCACGAAAGTGTGATGGAGCG  
ACGCCGCGTGTAGGATGAAGTCCTTCGGGATGTAAACTACTGTCAGGGGAAAGAAAGTTC  
TGATCTACCCAGAGGAAGGCACGGCTAACTCTGTGCCAGCAGCCGCGGTAAGACAGAGG  
TGCCAAGCGTTAGGCGGAATCACTGGGCTTAAAGCGTGTGTAGGCGGATTGACAAGTACC  
TTGTGAAATCCCACGGCTCAACCGTGGAAGTCTTGGTATACTGTGATCTTGAGGCATC  
TAGGGGCAACTGGAACAAACGGTGGAGCGGTGAAATGCGTAGATATCGTTTGGAACGCCA  
ATGGTGAAGACAGGTTGCTGGGGATGTACTGACGCTGAGACACGAAAGCCAGGGGAGCAA  
ACGGGATTAGAGACCCAGTAGTCC

>Otu390

CCAGCCTATGGGGGGCACCAGTCGAGAATATTCCACAATGGACGAAAGTCTGATGGAGCG  
ACACCGCGTGCAGGATGAAGGCCCTTCGGGTCGTAAACTGCGGTAGTATGGTAAGAATGCA  
AATGACTGTCATACGGAAAGAGGTGGGTAACTACGTGCCAGCACCAGCGGTAATACGTAG  
ACCTCAAGCGTTATCCGGATTTATTGGGCGTAAAGCGCACGTAGGAGGTTTTGCGCGTCT  
TTTGTTAAAGCCCAGGGCCTAACCCCTGGAGATGCAGGAGATACGGCAGAACTAGAGGAGG  
TTAGAGGTGCATGGAAGTACCGGTGTAGGGGTGAAATCCGTTGATATCGTGGGGAACACC  
AAAGGCGAAGGCAGTGCAGTGGGACCTTCCTGACTCTGAGTTGCGAAAGCGTGGGGAGCA  
AAAAGGATTAGAAACCCGTGTAGTCC

>Otu391

CCAGCCTATGGGGGGCAGCAGTGAGGAATATTGGGCAATGCCCCGCAAGGGTGACCCAGCA  
ACGCCGCGTGAAGGATGAAAGCCGTAAGGTTGTAAACTTCTGTTAGAGGGGACGAATAGC  
TTCGATCAAATCGAAGTTTGACGGTACCCTCAGAGAAAGCCCCGGCTAACTACGTGCCAG  
CAGCCGCGGTAATACGTAGGGGGCAAGCGTTGTCCGGATTTACTGGGTGTAAAGGGCGCG  
TAGGCGGCTATATAAGTCAGTGGTGAAATCCTGCGGCTTAACTGCAGAACTGCCATTGAT  
ACTGTATAGCTTGAGTGCAGGAAGAGAGAGACGGAATTCCAGGTGTAGTGGTGAAATACGT  
AGATATCTGGAAGAACACCAGTTGCGAAGGCGGTCTCTTGGTCCGTTACTGACGCTGAGG  
CGCGAAAGCGTGGGTAGCAAACAGGATTAGATACCCAGTAGTCC

>Otu392

CCAGCCTACGGGGTGCAGCAGGCGCGAAACCTTTACAATGCGCGAAAGCGTGATAAGGGA  
ACTCTGAGTGGCAGCCGGCTTTTGCCGACTGTCTTTTGGCAACCCCAAACCGGTTGCAGA  
ATAAGTTCTGGGTAAGACCAGTGCCAGCCGCCATGTGCTCACGCACAATGCGCACGGTAC  
GCGGTAATACTGGCAGAACGAGTGGTGTCCACGAATATTGGGTCTAAAGAGACCGTAGCT  
GGCCTGTAAAGTCCACTGTGAAATCTTGGGGCTCAACCTCAAGGCGTGCACTGGATACTG  
GTAGGCTTGAGAGCGGGGGAGGTCAGGAGTACTTACGGGGTAAGGGTAAAATCTGTTGAT  
CCTGTAAGGACTACCAGTGGCGAAGGCGCCTGACCAAAACGCGTCTGACAGTGAGGGTCG  
AAGGCTAGGAGAACGAATCGGATTAGATACCCAGTAGTCC

>Otu393

CCAGCCTACGGGGGGCAGCAGTGGGGAATATTGGACAATGGGCGAAAGCTTGATCCAGCG  
ATATCACATGAAAGAAGAAGGCTTTATGTGCTAACTTTCTTACGTTAAGGAGGATAATGA  
CGTGTACTTAAAAGGGAGTCCCGGCTAACCTCGTGCCAGCAGCCGCGGTAATACGGGGGG  
GACGAGTGTTACTCATAATGACTGGGCGTAAAGGGTATGTAGATGGTTTAATTAGTTAAG  
TGCTAAATAATAAATTAAAAGTTTATATAATGTACGTAAACGTTTAACTAGAGTATAT

TAGAGGAATATGGAATTTTTAATGTAAGGGTAAAATTTGTCAATAATAAAAAGACGACCG  
AAGGCGAAGGCAATATTCTGGGATATTACTGACATTGAGGTACTGAAGCATGGGGATCAA  
ATCGGATTAGAAACCCCTCGTAGTCC

>Otu394

CCAGCCTATGGGGGGCAGCAGTAGGGAATATTGCATAATGGGCGAAAGCCTGATGCAGCA  
ACGCCGCGTGTGCGATGAAGGCCTTCGGGTGTAAAGCACTTTTCGAGGGGATGAGGAAG  
GACAGTACCCTCGGAATAAGCCTCGGCTAACTACGTGCCAGCAGCCGCGGTAAAACGTAG  
GAGGCGAGCGTTATCCGGATTACTGGGCGTAAAGCGTGTGCAGGCGGTTCCGGCAAGTTG  
GATGTGAAAGCTCCCGGCTTAACTGGGAGAGGTCGTTCAAACTACCGGACTTGAGGATG  
GGAGAGGGAGGTGGAATTCCGGGTGTAGTGGTGAATGCGTAGATATCCGGAGGAACACC  
AGTGGCGAAGGCGGCCTCCTGGCCATTTCTGACGCTCATACACGAAAGCTAGGGGAGCG  
AACGGGATTAGAAACCCGAGTAGTCC

>Otu395

CCAGCCTATGGGTGGCAGCAGTGGGGAATTTTGCGCAATGGGCGAAAGCCTGACGCAGCA  
ACGCCGCGTGGGTGATGAAGGTCTTCGGATCGTAAACCCTGTCGTCAGGGACGAAGGTT  
GTATGTCTAATAGATGTGCAGCTTGACGGTACCTGGAGAGGAAGCCCCGGCTAACTCTGT  
GCCAGCAGCCGCGTAATACAGAGGGGGCAAGCGTTATTCGGAATTATTGGGCGTAAAGG  
GCGCGTAGGCGGTGATGTAAGTGAGATGTGTAATCCCCGAGCTTAACTTGGGAAGTCAT  
CTCAGACTGTGTCGCTAGAGTGCTGGAGAGGGTGGTGAATTCCACGTGTAGCGGTGAAA  
TGCGTAGAGATGTGGAGGAACACCAAGTGGCGAAGGCGGCCACCTGGACAGTAAGTACGC  
TGAGGCGCGAAAGTGTGGGGAGCAAACAGGATTAGATACCCCTCGTAGTCC

>Otu396

CCAGCCTACGGGTGGCTGCAGTAACGAATCTTCCGCAATGCACGCAAGTGTGACGGAGCG  
ACGCCGCGTGTGGGATGAAGTCTTCGGAATGTAAACCACTGTCAGGGGTTAGAAAGTTC  
TGATCAACCCAGAGGAAGGCACGGCTAACTCTGTGCCAGCAGCCGCGGTAAAGACAGAGG  
TGCCAAGCGTTAGGCGGAATCACTGGGCTTAAAGCGTGTGTAGGCGGATTTCTAAGTACC  
TTGTGAAATCCCACGGCTCAACCGTGGAACTGCTGGGTATACTGGTTATCTTGAGCCACT  
TAGGGGTACAGCGGAACAAATGGTGGAGCGGTGAAATGCGTAGATATCATTTGGAACGCCA  
ATGGTGAACACAGCTGACTGGGAGTGTGCTGACGCTGAGACACGAAAGCTAGGGGAGCAA  
ACGGGATTAGAAACCCCTCGTAGTCC

>Otu397

CCAGCCTACGGGGGGCTGCAGTGAGGAATATTGGTCAATAGGGGGAACCCTGAACCAGCC  
ATGCCGCGTGAAGGAAGAATGCCCTAAGGGTTGTAAACTTCTTTTGTATGGGAGTAAAGA  
CAGGTACGTGTACCTGGAAGAAAGTACTGTACGAATAAGCATCGGCTAACTCCGTGCCAG  
CAGCCGCGGTAATACGGAGGATGCGAGCGTTATCCGGATTTATTGGGTTTAAAGGGTGC  
TAGGCGGGTTTGTAAAGTCAGCGGTGAAAGACTGTCGCTTAACGATAGCATTGCCATTGAT  
ACTGCAGATCTTGAGTACAGTTGAGGTAGGCGGAATGTGTAGTGTAGCGGTGAAATGCTT  
AGATATTACACAGAACACCAATTGCGAAGGCAGCTTACTAAAGTGTAACTGACGCTGAGG  
CACGAAAGCGTGGGGATCAAACAGGATTAGAAACCCGCGTAGTCC

>Otu398

CCAGCCTATGGGTGGCACCAGTGGGGAATATTGGACAATGGGGGCAACCCTGATCCAGCA  
ATGCCGCGTGGGTGATGAAGGCCTTCGGGTGTAAAGCCCTTTTCGGCGGGGAAGATGATG  
ACGGTACCCGCGAGAAGAAGCCCCGGCTAACTTCGTGCCAGCAGCCGCGGTAAATACGAAGG  
GGGCTAGCGTTGTTTCGGAATTACTGGGCGTAAAGGGCGCGTAGGCTGTGCTGTAAGTCAG  
GCGTGAAAGGCCCGGGCTCAACCTGGGAAGTGCCTTGATACTGCGGCGCTGGAAGGCGG  
GAGAGGATGGCGGAATTCCAGTGTAGAGGTGAAATTCGTAGATATTGGGAAGAACACCG  
GTGGCGAAGGCGGCCATCTGGCCCGCAATTGACGCTGAGGCGCGAAAGCGTGGGGAGCAA  
ACAGGATTAGATACCCAGTAGTCC

>Otu399

CCAGCCTACGGGTGGCAGCAGTCGAGAATATTTCGACAATGGACGAAAGTCTGATCGAGCG  
ACGCCGCGTGCAGGATGAAGGCCTTCGGGTGTAAAGTGCAGTAATATAGTAACAATGTA  
AATGAGTGTATATGGAAAGAGGTGGGTAACCTACGTGCCAGCAGCCGCGTAAAACGTAG  
ACCTCAAGCGTTATCCGGATTTATTGGGCGTAAAGCGCATGTAGGAGGTTTGTGCGTCT  
TCTGTTAAATCCCACCGCTAACGGTGGACCTGCAGGAGATACGACATGACTAGAGGAGG  
TTAGAGGTGCATGGAAGTACCGGTGTAGGGGTGAAATCCGTTGATATCGTGGGGAAACACC  
AAAGGCGAAGGCAGTGCAGTGGGACCTTCTGACTCTGAGATGCGAAAGCGTGGGGAGCAA  
AAAAGGATTAGAGACCCTGGTAGTCC

>Otu400

CCAGCCTATGGGGCGCTGCAGTAACGAATCTTCCGCAATGCACGAAAGTGTGACGGAGCG  
ACGCCGCGTGTGGGACGAAGTCCTTCGGGATGTAAACCACTGTCAGGGGTAGAAAAGTTC  
TGATCAACCCAGAGGAAGGCACGGCTAACTCTGTGCCAGCAGCCGCGGTAAGACAGAGG  
TGCCAAGCGTTAGGCGGAATCACTGGGCTTAAAGCGTGTGTAGGTGGACTGGTAAGTACC  
TTGTGAAATCCCACGGCTCAACCGTGGAACTGCTCGGTATACTGCTGGTCTTGAGCAACT  
TAGGGGCGAGCGGAACAAATGGTGGAGCGGTGAAATGCGTAGATATCATTTGGAACGCCA  
ATGGTGA AACAGCTCGCTGGGAGTTTGCTGACACTGAGACACGAAAGCTAGGGGAGCAA  
ACGGGATTAGATACCCAGTAGTCC

>Otu401

CCAGCCTATGGGGCGCAGCAGTTAAGGAACTTTTACAATGCTCGAAAGAGTGATAAAATC  
AACCAGAGTGTTCCTTTTAGAAAACCTTTTGTCTGCTGTAAAAAGGCAGATGAATAAGGA  
CTGGGCAAGACCGGTGCCAGCCGCCGCGGTAATCCCGGCGGTCCGAGTCGCATCCACATT  
TATTGGGTCTAAAACATCCGTAGCTTGTTTTGTAAGTCTCTTGTGAAATCCCATCTCTCA  
AATTTGGGGCGTGCAAGAGATACTACATTGCTAGAGATCGGAAGACGTAAAGAGAACGAT  
TGAGGTAGCGGTAAAATGTGTTAATCTTGATCGGACTAACAATGGCGAAGGCACCTTTACG  
AGTACGAATCTGACAGTGAGGGATGAAGGCTAGGGGCGCAAAGGGATTAGATACCCAG  
TAGTCC

>Otu402

CCAGCCTATGGGGGGCACCAGCTAAGAATCTTCCGCAATGGGGGAAACCTGACGGAGCG  
ACGCCGCGTGATGATGAAGGCCGTAAAGTTGTAAAATCCTTTTGTTCGGTGAAGAATAAG  
CGGGGAGTGGAAGCCCTCGTGATGACGTAGCCGACGAATAAGCCCCGGCTAATTACG  
TGCCAGCAGCCGCGTAATACGTATGGGGCAAGCGTTGTTTCGGATTTATTGGGCGTAAAG  
GGCGTGTAGGCGGCTTATCAAGTCCGGTGTGAAATAGCAGAGCCCAACTCTGCGTATGCG  
CTGGAACCTGGTAGGCTTGAGTTCTTGAGGGGAAGCTGGAATTCCAGGTGTAGGAGTGAA  
ATCTGTAGATATCTGGAAGAACCCGGTGGCGAAGGCGAGCTTCTATCAGAGGACTGACG  
CTGAGGCGCGAAAGCGTGGGGAGCAAACAGGATTAGATACCCTAGTAGTCC

>Otu403

CCAGCCTACGGGGGGCACCAGGCGCGAAAACTTTACAATGCGGGAAACCGTGATAAGGGA  
ACTCCGAGTGCCCGTAAAATCGGGCTGTCCATCTGTTTAAATAACAGGTGAAGAAAGGGC  
CGGGCAAGACCGGTGCCAGCCGCCGCGGTAATACCGGCGGCTCGAGTGGTGCCACTATT  
ACTGGGCTTAAAGCGTTCGTAGCTGGTCTGTAAAGTCTCTGGGGAAATCTACTGGCTTAA  
CCAATAGGCGTTTCAGGGATACTGGCAGACTAGGGACCGGAGAGGTGAGGGGTACTCCA  
GGGGTAGGAGTGAAATCCTGTAATCCTTGGGGGACCACCTGTGGCGAAGGCGCCTCACCA  
GAACGGCTCCGACAGTGAGGGACGAAAGCTGGGGGAGCAAACCGGATTAGATACCCAGT  
AGTCC

>Otu404

CCAGCCTATGGGGGGCTCCAGTCGAGAATCTTCCGCAATGGGCGCAAGCCTGACCGAGCG  
ACGCCGCGTGAGGATGAAGGCCTTCGGGTGTAAACTCCTGTTCAGGGGGAGGAAGGGG  
CAACCTTGACCGATCCCTGGAGGAAGCACGGGCTAAGTTCGTGCCAGCAGCCGCGGTAAG  
ACGAACCGTGCGAACGTTATTCGGAATCACTGGGCTTAAAGCGCGTGTAGGCGGGCCGCC  
ACGTCGGCTGCTGAAATCCCCCGGCTCAACCGGGGAACGGGCACCGATACGAGCGGCCTC  
GAGGGGGGTAGGGGGCACTGGAACCTCCGGTGGAGCGGTGAAATGCGTTGAGATCGGAAG  
GAACGCCCGTGCGGAAAGCGAGTGCTGACCCTTTCTGACGCTGAGACGCGAAAGCCAG  
GGGAGCGAACGGGATTAGAAACCCTTG TAGTCC

>Otu405

CCAGCCTATGGGTGGCACCAGCCAAGAATCTTCCGCAATGGGGGAAACCTGACGGAGCG  
ACGCCGCGTGAAGGATGAAGGTCTTCGGATTGTAAACTTCTTTTGTTCGGGAAGAATAAG  
GGTGATAGGAAATGATCATCTGATGACGGTACCGAATGAATAAGCCCCGGCTAATTACGT  
GCCAGCAGCCGCGTAATACGTAAGGGGCGAGCGTTGCTCGGAATTACTGGGCGTAAAGG  
GCTTGTAGGCGGTCTTGTAAGTCGAATGTAAAAAACACGGCTCAACCGTGGGGCTGCGT  
TCGAAACTGCAAGGCTAGAGTTTGGTGGAGGGCGATGGAATTCCTGGTGTAGCGGTGAAA  
TGCGTAGATATCGGGAAGAACACCGAAGGCTAAAGCAGTCGTCTATGCCGAAACTGACGC  
TGAGGAGCGAAAGCATGGGGATCAAACAGGATTAGATACCCCGTAGTCC

>Otu406

CCAGCCTATGGGTTGCACCAGTAGGGAATCTTGCGCAATGGGCGAAAGCCTGACGCAGCC  
ATGCCGCGTGAATGATGAAGGTCTTAGGATTGTAAAATTCTTTCAGCGGGGACGATAATG  
ACGGTACCCCGAGAAGAAGCCCCGGCTAACTTCGTGCCAGCAGCCGCGGTAATACGAAGG  
GGGCTAGCGTTGCTCGGAATTACTGGGCGTAAAGGGCGCGTAGGCGGATGCTTAAGTCAG

AGGTGAAAGCCCAGGGCTCAACCTTGGAAGTGCCTTTGATACTGGGCATCTTGAGTATGG  
GAGAGGTGAGTGGAAGTCCGAGTGTAGAGGTGAAATTCGTAGATATTCGGAAGAACACCA  
GTGGCGAAGGCGACTCACTGGCCCATTAAGTACGCTGAGGCGCGAAAGCGTGGGGAGCAA  
ACAGGATTAGATACCCGAGTAGTCC

>Otu407

CCAGCCTATGGGGGGCTGCAGGCGCGAAACCTTCGCAATGCGCGCAAGCGCGACGAGGTT  
ATTCTGAGTGATTCCCGCTGAGGGAATCTTTTCTTAGATCTAAAAAGTCTGGGGAATAAG  
GGGAGGGCAAGTCTGGTGTGAGCCGCCGCGGTAATACCAGCTCCTCGAGTGGTCAGGGCG  
TTTATTGGGCCTAAAGCATCCGTAGCCTGCTCAGTAGGTCTCCTGTTAAATCCAACGGCT  
CAACCGTTGGTCTGCAGGAGATACCGCTGGGCTAGGAGGCGGGAGAGGCGGACGGTACTC  
CGAGGGTAGGGGTAAAATCCTTTGATCCCCGGAAGACCACCAGTGGCGAAGGCGGTCCGC  
CAGAACGCGCTCGACGGTGAGGGATGAAAGCTGGGGGAGCGAACCGGATTAGAAACCTC  
GTAGTCC

>Otu408

CCAGCCTACGGGAGGCAGCAGTAAGGAATATTGGTCAATGGACGCAAGTCTGAACCAGCC  
ATGCCGCGTGAAGGATGAAGGCCCTCTGGGTGTAAACTTCTTTTATCTGGGACGAAAAA  
CAGGGATTCTTCCTTGCTCGACGGTACCAGAGGAATAAGCACCGGCTAACTCCGTGCCAG  
CAGCCGCGGTAATACGGAGGGTGCAAGCGTTATCCGGATTTACTGGGTTTAAAGGGTGCG  
TAGGTGGGCAGGTAAGTCAGTGGTGAAATCTCCGGGCTTAACTCGGAACTGCCATTGAT  
ACTATCTGTCTTGAATTATCTGGAGGTAAGCGGAATATGTCATGTAGCGGTGAAATGCTT  
AGATATGACATAGAACACCCATTGCGAAGGCAGCTTACTACGGATCGATTGACACTGAGG  
CACGAAAGCGTGGGGATCAAACAGGATTAGAAACCCCCGTAGTCC

>Otu409

CCAGCCTACGGGTCGCTGCAGTAGGGAATATTGGTAATCTGCGAAAGCGGGAACCAGCAA  
CGCCGCGTGTGCGATGAAGGCCTTCGGGTGCTAAAGCACTTTTATAGAGGGATGAGGAAG  
ACAGTACCTTTAGAATAAGCCTCGGCTAACTACGTGCCAGCAGCCGCGGTAAAACGTAGG  
AGGCAAGCGTTATCCGGATTTACTGGGCGTAAAGCGTGTGCAGGCGGTTCCGTAAGTTGG  
ATGTGAAAGCTCCCGGCTTAACCTGGGAGAGGTCGTTCAATACTGCCGGGCTAGAGAGTGG  
TAGAGGGAGGTGGAATTCCGGGTGTAGTGGTGAAATGCGTAGATATCCGGAGGAACACCA  
GTGGCGAAAGCGGCCTCCTGGACCATCTCTGACGCTCATACACGAAAGCTAGGGGAGCAA  
ACGGGATTAGATACCCGAGTAGTCC

>Otu410

CCAGCCTATGGGGGGCTGCAGTAGGGAATATTGCATAATGGGCGAAAGCCTGATGCAGCA  
ACGCCGCGTGTGCGATGAAGGCCTTCGGGTGCTAAAGCACTTTTATAGAGGGGATGAGGAAG  
GACAGTACCCTCTGAATAAGCCTCGGCTAACTACGTGCCAGCAGCCGCGGTAAAACGTAG  
GAGGCGAGCGTTATCCGGATTTACTGGGCGTAAAGCGCGCGCAGGTGGTTTGGTAAGTTG  
GATGTGAAAGCTCCTGGCTTAACCTGGGAGAGGTCGTTCAAGACTGCTAACTTGAGTGTG  
GGAAAGGAAGGCGGAATTCCGGGTGTAGTGGTGAAATGCGTAGATATCCGGAGGAACACC  
AGTGGCGAAAGCGGCCTTCTGGCCCACTGACACTCATGAGCGAAAGCTAGGGGAGCG  
AACGGGATTAGAAACCCTCGTAGTCC

>Otu411

CCAGCCTATGGGGGGCTGCAGTCGAGGATCTTCGTCAATGGGCGAAAGCCTGAACGAGCG  
ACGCCGCGTGTGCGATGAAGGCCTTCGGGTGTAAAGCACAAAAGTGGGGATAAAAGCCG  
AAAGGTCTGATAGATCCACAGTAAGCACGGGCTAAGTTTCGTGCCAGCAGCCGCGGTAAAG  
CGAACCGTGCGAACGTTGTTTCGGAATCACTGGGCTTAAAGGGCGCGTAGGCGGGCGGTCA  
AGTCTATGGTGAAATCCTCCAGCTCAACTGGAGAACTGCCGTGGATACTGATTGTCTCGA  
GGGAGGTAGGGGCGTGCGGAACGGTCGGTGGAGCGGTGAAATGCGTTGATATCGATCGGA  
ACTCCGGTGGCGAAGGCGGCACGCTGGACCTCTTCTGACGCTGAGGCGCGAAAGCCAGGG  
GAGCAAACGGGATTAGAAACCCCTGTAGTCC

>Otu412

CCAGCCTATGGGGGGCACCAGTGGGGAATATTGGACAATGGGGGGAACCCTGATCCAGCA  
ATGCCGCGTGTGTGAAGAAGGCCTGAGGGTTGTAAAGCACTTTCAGTGGGGAGGAGGTTA  
GTTTGGTTAAGAGCTGGATTAATGGACGTTACCCACAGAAGAAGCACCGGCTAACTCCGT  
GCCAGCAGCCGCGTAATACGGAGGGTGCGAGCGTTAATCGGAATTACTGGGCGTAAAGG  
GTGCGTAGGTGGTTAATTAAGTTATGTGTAAAATCCCCGGGCTTAACCTGGGCAGGTCAT  
ATAATACTGATTGACTCGAGTATGGGAGAGGGTAGTGGAATTTCCGGTGTAGCGGTGAAA  
TGCGTAGAGATCGGAAGGAACACCAGTGGCGAAGGCGGCTACCTGGCCTAATACTGACAC  
TGAGGCACGAAAGCGTGGGGAGCAAACAGGATTAGATACCCCCGTAGTCC

>Otu413

CCAGCCTATGGGTGGCAGCAGTCGAGGATTTTTCTCAATGGGGGAAACCCTGAAGGAGCG  
ACGCCGCGTGGGGGATGAAGGTCTTCGGATTGTAAACCCCTGTCATCCGGGAACAATGTA  
ATCTACCTAACACGTGGATTATTGATAGTACTGGAAGAGGAAGCCGTGGCTAACTCTGTG  
CCAGCAGCCGCGGTAATACAGAGACGGCAAGCGTTGCTCGGATTCAATTGGGCGTAAAGGG  
TCCGCAGGCGGTTCGGTTAAGTCGGATGTGAAATCTCACAGCCTAACTGTGATCTGTCAAT  
CGATACTAGCCGGCTCGAGGACTGGAGAGGAGACTGGAATTGTCCGTGTAGCGGTGAAAT  
GCGTAGAGATCGACAAGAACACCGGTGGCGAAGGCGAGTCTCTGGACAGTTCCTGACGCT  
CAGGGACGAAAGCTAGGGGAGCAAACGGGATTAGATAACCCAGTAGTCC

>Otu414

CCAGCCTACGGGTCGCAGCAGTCGAGAATATTTGGCAATGGGCGAAAGCCTGACCATGCG  
ACGCCGCGTGCTGGACGAAGTCCTTCGGGACGTAAACAGCTTTTATGAGGGAGGAAGTAA  
TTGACGTTACCTCATGAATAAGGGGCTCCTAACTCTGTGCCAGCAGGAGCGGTAATACAG  
AGGCCCCGAGCATTATCCGGAATCACTGGGCGTAAAGGGTGTGTAGGCGGTTCGTGTAGT  
CCTTCGTCAAAGATCTTGGGCTTAACCCAGGAGATGCGCGGGAAACGGCACGACTTCGAG  
GACGCGAGAGGTTGAGGGAACTCATGGTGTAGGGGTGAAATCCGTTGATATCATGGGGAA  
CACCAAATGCGAAGGCACTCAACTGGCGCGCTCCTGACGCTGAAACACGAAAGCGTGGGT  
AGCGAATGGGATTAGAAACCCCTAGTAGTCC

>Otu415

CCAGCCTATGGGTTCGAGCAGTGAGGAATATTGCGCAATGGGGGAAACCCTGACGCAGCG  
ACGCCGCGTGGGTGAAGAAGGCCTTCGGGTGTAAAGCCCTGTCAGGTGGGAAGAAACCT  
TTAAAGGTGAATAGCCTTTGAAACTGACGGTACCACCAAAGGAAGCACCGGCTAACTCCG  
TGCCAGCAGCCGCGGTAAGACGGAGGGTGCAAGCGTTGCTCGGAATTACTGGGCGTAAAG  
CGCGTGTAGGCGGTCCGATAAGTCGAGTGTGAAAGCCCGGGGCTCAACCTCGGAAGTGCA  
TTCGAAACTGTTCGACTTGAGTACGGGAGAGGGAAGTGGAATTCCTGGTGTAGAGGTGAA  
ATTCGTAGATATCAGGAGGAACACCGGTGGCGAAGGCGGCTTCCTGGACCGATACTGACG  
CTGAGACGCGAAAGCGTGGGGAGCAAACAGGATTAGAAACCCCGTAGTCC

>Otu416

CCAGCCTATGGGTGGCAGCAGTGGGGAATATTGCGCAATGGGCGAAAGCCTGACGCAGCG  
ACGCCGCGTGAGGGATGAAGGCCTTCGGGTGTAAACCTCTTTCAGCAGGGACGAAGCGA  
AAGTGACGGTACCTGCAGAAGAAGCACCGGCCAACTACGTGCCAGCAGCCGCGGTAATAC  
GTAGGGTGCAAGCGTTGTCCGGAATTATTGGGCGTAAAGAGCTCGTAGGCGGTTTGTTCG  
GTCGGCTGTGAAAACCTCGGGGCTCAACCCCGAGCCTGCAGTCGATACGGGCAAACCTAGAG  
TGTGGTAGGGGAGACTGGAATTCCTGGTGTAGCGGTGAAATGCGCAGATATCAGGAGGAA  
CACCGGCGGCGAAGGCGGGTCTCTGGGCCATAACTGACGCTGAGGAGCGAAAGCGTGGGG  
AGCGAACAGGATTAGATAACCCGTGTAGTCC

>Otu417

CCAGCCTACGGGACGCTCCAGGCGCGAAAACCTTTACACTGCGCGAAAGCGCGATAAGGGG  
ACCTCGAGTGCGTGCGCAATGCGTACGCTTTTCAGATGCCTAAAAAGCATCTGGAATAAG  
GGCCGGGCAAGACCGGTGCCAGCCGCCGCGGTAACACCGGCGGCTCAAGTGGTGGCCGCT  
ATTATTGGGCTTAAAGGGTCCGTAGCCGGACCACTAGTCCCTTGGGAAATCTTACGGCT  
TAACCGTAAGGCTGCCAATGGATACTGCTGGTCTTGGGACCGGGAGAGGCAAGAGGTACC  
TCAGGGGTAGGAGTGAAATCCTGTAATCCTTGAGGGACCGCCAGTGCGGAAGGCGTCTTG  
CTAGAACGGGTCCGACGGTGAGGGACGAAAGCTAGGGGCACGAACCGGATTAGAAACCCCT  
CGTAGTCC

>Otu418

CCAGCCTATGGGTTCGCAGCAGTCGAGAATTTTTCTCAATGGGGGAAACCCTGAAGGAGCG  
ACGCCGCGTGAGAGATGAAGGTCTTCGGATTGTAAACTCCTGTCATTAGGGAACAATTAC  
CAGCGATTAACTGTCGCGGGTTTGATAGTACCTGAAGAGGAAGAGACGGCTAACTCTGTG  
CCAGCAGCCGCGGTAATACAGAGGTCTCAAGCGTTGTTTCGGATTCAATTGGGCGTAAAGGG  
TGCGTAGGCGGCGAGGCAAGTCAGGTGTGAAATCTCGGGGCTCAACTCCGAAACTGCACT  
TGATACTGCCTTGCTAGAGTACTGGAGAGGAGATTGGAATTTACGGTGTAGCAGTGAAAT  
GCGTAGATATCGTAAGGAAGACCACTGGCGAAGGCGAATCTCTGGACAGTTACTGACGCT  
GAGGCACGAAGGCCAGGGGAGCAAACGGGATTAGAAACCCCTCGTAGTCC

>Otu419

CCAGCCTACGGGGGGGCTGCAGCAACGAATATTCGCAATGGGCGCAAGCCTGACGGAGCG  
ACGCCGCGTGAGAGATGAAGTCCTTCGGGATGTAAACTCCAATAGTTTGTGAGGAAGTGA  
CCCGGCCTAATACGCCGGGAAGTTGACCAGCAGATGAAAGGGGCGGCTAACTCCGTGCCA

GCAGCCGCGGTAATACGGAGGCCCCGAGCGTTGTTTCGGAATTACTGGGCTTAAAGCGCGT  
GTAGGCGGGCTGGTAAGTGTCTTGTGAAATCCCCGGGCTCAACCCGGGAATTGCTCGGCA  
TACTGCCGGTCTTGAGGCAGGTATGGGTCAGTGAACCTTAGGTGTAGCGGTGAAATGCG  
TAGATATCTAAGGGAACGCCGGTGGCGAAAGCGGGTGACTGGGCCTGTCCTGACGCTGAG  
ACGCGAAAGCGTAGGGAGCAAACGGGATTAGAAACCCGTGTAGTCC

>Otu420

CCAGCCTATGGGGGGCAGCAGTGAGGAATATTGCACAATGGGCGAAAGCCTGATGCAGCG  
ACACCGCGTGAAGGATGAAGGTCTTAGGATTGTAACTTCTGTTAAGTGGGAAAAAAGAC  
TCATTTCAAATAAAAATGAGGGATGATGGTACCCTAGAGAAAGCACCGGCTAACTTCGT  
GCCAGCAGCCGCGTAATACGAGGGGTGCAAACGTTATTCGGAATTACTGGGTGTAAAGG  
GTACGTAGACGGCATATTAAGTCAGTTGTTAAATTCCCCAGCTTAACTGGGGGTAGGCGA  
TTGAAACTGATAAGCTAGAGGATGAGAGAGAGAAGTGGAATTCTCGGAGTAGCGGTAAAA  
TGCGTAGATCTCGAGAGGAACACCGATGGCGAAGGCAGCTTCTTGGCTCATTTCTGACGT  
TGAGGTACGAAAGCGTGGGGAGCAAACAGGATTAGAAACCCGAGTAGTCC

>Otu421

CCAGCCTATGGGTCGCTGCAGTGGGGAATCTTGCACAATGGGGGCAACCCTGATGCAGCG  
ACGCCGCGTGAGCGATGAAGCCCTTCGGGGTGTAAAGCTCTTTCGGCAGGGACGATAATG  
ACGGTACCTGAAGAAGAAGCTGCGGCTAACTACGTGCCAGCAGCCGCGTAATACGTAGG  
CAGCGAGCGTTGTTTCGGAATTACTGGGCGTAAAGCGTGCGCAGGCGGTCCGCTAAGACAG  
ATGTGAAATCCCCGGGCTTAACCTGGGAAGTGCATTTGTGACTGGCGGGCTAGAGTATGG  
CAGAGGGGGGTAGAATTCACCGTGTAGCAGTGAAATGCGTAGAGATGTGGAGGAATACCG  
ATGGCGAAGGCAGCCCCCTGGGCCAATACTGACGCTCATGCACGAAAGCGTGGGTAGCAA  
ACAGGATTAGAGACCCCTGTAGTCC

>Otu422

CCAGCCTATGGGAGGCAGCAGTGGGGAATATTGCACAATGGGCGCAAGCCTGATGCAGCC  
ATGCCGCGTGTGTGAAGAAGGCCTTCGGGTGTAAAGCACTTTCAGCGAGGAGGAAGGGT  
ATCGTGTTAATAGCACGGTACATTGACGTTACTCGCAGAAGAAGCACCGGCTAACTCCGT  
GCCAGCAGCCGCGTAATACGGAGGGTGCAAGCGTTAATCGGAATTACTGGGCGTAAAGC  
GCACGCAGGCGGTTTGTAAAGTCAGATGTGAAATCCCCGAGCTTAACTTGGGAAGTGCAT  
TTGAAACTGGCAAGCTAGAGTCTTGTAGAGGGGGGTAGAATTCAGGTGTAGCGGTGAAA  
TGCGTAGAGATCTGGAGGAATACCGGTGGCGAAGGCGGCCCCCTGGACAAAGACTGACGC  
TCAGGTGCGAAAGCGTGGGGAGCAAACAGGATTAGAAACCCCTGTAGTCC

>Otu423

CCAGCCTACGGGAGGCTCCAGTAGGGAATATTGCACAATGGAGGAAACTCTGATGCAGCG  
ACGCCGCGTGAGTGATGAAGGACTTCGGTTGTAAAGCTCTGTTCTTAGGGAATAAAAAA  
ATGAATGTACCTGAGGAGAAAGCACCGGCTAACTTCGTGCCAGCAGCCGCGTAATACGA  
AGGGTGCAAGCGTTGCTCGGAATCATTGGGCGTAAAGCGAGCGCAGGTGGTCTTGTAAGT  
CAGGAGTGAAATCCCAGGGCTCAACCCTGGAAGTGCTTTTGATACTGCGAGACTTGAAATG  
TGGGAGAGGGTACTAGAATACATAGTGTAGTGGTGAAATACGTAGATATTATGTGGAACA  
CCGGTGGCGAAGGCGGGTGCTGGCCCAACATTGACACTTAGGCTCGAAAGCGTGGGGAT  
CAAACAGGATTAGAAACCCCTGTAGTCC

>Otu424

CCAGCCTACGGGGGGCACCAGTGGGGAATTTTGCGCAATGGGCGAAAGCCTGACGCAGCA  
ACGCCGCGTGCGGGATGAAGGCCTTCGGGTGTAAACCGCTTTCAGCAGGGATGAAATTG  
ACAGTACCTGCAGAAGAAGCCCCGGCTAACTACGTGCCAGCAGCCGCGTAATACGTAGG  
GGGCAAGCGTTATCCGGATTCAATTGGGCGTAAAGAGCGCGTAGGCGGATTGTTAAGTCAG  
ATGTGAAACTGGGGGCTCAACCCGCAGCCTGCATCTGAAACTGGCAGTCTTGAGTCTGG  
TAGAGGAAAGTGGAATTCACAGTGTAGCGGTGAAATGCGCAGATATTGGGAGGAACACCA  
GTGGCGAAGGCGGCTTCTGGGCCACGACTGACGCTGAGGCGCGAAAGCTAGGGGAGCAA  
ACAGGATTAGAAACCCCTGTAGTCC

>Otu425

CCAGCCTACGGGGTGCAGCAGTGGGGAATATTGGACAATGGGGGAAACCCTGATCCAGCG  
ACGCCGCGTGTGTGAAGAAGGCCTGCGGGTGTAAAGCACTTTTAGTGGGGACAAAAAGC  
CACGAATAATACTACGTGGTCTTGATTTAACCTACAGAAAAAGCACCGGCTAACTCTGT  
GCCAGCAGCCGCGTAATACAGAGGGTGCGAGCGTTAATCGGAATTACTGGGCGTAAAGC  
GCGCGTAGACGGTTTGGTAAAGTCAGATGTGAAATCCCTGGGCTCAACCTGGGAAGTGCAT  
TTGATACTGCCTGGCTAGAGTATGGAAGAGGGAAGTGGAATTTCCGGTGTAGCGGTGAAA  
TGCGTAGATATCGGAAGGAACACAGTGGCGAAAGCGACTTCCTGGTCCAATACTGACGT



TCATGTGCGAAAAGCGTGGGGAGCAAACAGGATTAGAAAACCCCGTAGTCC

>Otu426

CCAGCCTATGGGGGGCTCCAGTGGGGAATTTTTCGCAATGGGGGAAACCCTGACGCAGCA  
ACGCCGCGTGGAGGATGAAGCCCCTTGGGGTGTAACTCCTTTTCGACCGGGAAAATAATG  
ATGGTACCGGTGGAAGAAGCACC GGCTAACTCTGTGCCAGCAGCCGCGTAATACAGAGG  
GTGCGAGCGTTGTTTCGGAATTATTGGGCGTAAAGGGCGCGTAGGCGGTATTGTAAGTCAC  
CTGTGAAACCTCTAGGCTTAACCTAGAGCCTGCAGGCGAAACTGCAATGCTGGAGGGTGG  
GAGAGGTGCGTGGAATTCCCGGTGTAGCGGTGAAATGCGTAGATATCGGGAGGAACACCT  
GTGGCGAAAGCGGCGCACTGGACCACTACTGACGCTGATGCGCGAAAGCTAGGGGAGCAA  
ACAGGATTAGAAAACCCCGTAGTCC

>Otu427

CCAGCCTACGGGGTGCAGCAGTCGAGAATTTTTTCAATGGGGGAAACCCTGATGGAGCG  
ACGCCGCGTGGGGGATGACTGGCTTCGGCCCGTAAACCCTGTCAATTTGCGAACAAATTG  
ATTCACCTAACACGTGAAGCATTGATAGTAGCGGAAGAGGAAGGGACGGCTAACTCTGTG  
CCAGCAGCCGCGTAATACAGAGGTCCCAAGCGTTGTTTCGATTCACTGGGCGTAAAGGG  
TGCGTAGGTGGCCGGGTAAAGTCTGATGTGAAATCTCGCAGCTTAACTGCGAAACTGCATT  
GGATACTATCCGGCTGGAGGGTTCGGAGGGGGGACTGGAATTCTCGGTGTAGCAGTGAAT  
GCGTAGATATCGAGAGGAACACCAGTGGCGAAGGCGAGTCCCTGGACGACTCCTGACACT  
GAGGCACGAAAGCTAGGGGAGCAAACAGGATTAGATACCCCGTAGTCC

>Otu428

CCAGCCTACGGGGCGCTGCAGTGGGGAATATTGGACAATGGGCGCAAGCCTGATCCAGCC  
ATGCCGCGTGAGTGATGAAGGCCCTAGGGTTGTAAAGCTCTTTCGGCGGGGACGATGATG  
ACGGTACCCGCGAGAAGAAGCCCCGGCTAACTTCGTGCCAGCAGCCGCGTAATACGAAGG  
GGGCTAGCGTTGTTTCGGAATTACTGGGCGTAAAGCGCACGCAGGCGGTTCGTTTAGTTAG  
AAGTGAAAGCCCAGGGCTCAACCTTGAACTGCTTTTAATACTGGCGAACTAGAATCCGT  
GAGAGGGCAGTGGAATTCGAGTGTAGAGGTGAAATTCGTAGATATTTCGGAAGAACACCA  
GTGGCGAAGGCGACTGCCTGGCACGGTATTGACGCTCATGTGCGAAAGCGTGGGGAGCAA  
ACAGGATTAGAAAACCCCTCGTAGTCC

>Otu429

CCAGCCTATGGGGGGCTGCAGTAAGGAATATTGGTCAATGGACGCAAGTCTGAACCAGCC  
ATGCCGCGTGAGTGATGAAGTCCCTACGGATCGTAAACTGCTTTTGTACGGGAAAAAATC  
CCGGGTTTCTACCCGGGTTGATGGTACCGTAAGAATAAGGATCGGCTAACTCCGTGCCAG  
CAGCCGCGTAATACGGAGGATCCGAGCGTTATCCGGATTTACTGGGTTTAAAGGGTTCG  
TAGGTGGAATGTCAAGTCAGTGGTGAAAACCTGCAGCTTAACTGTAGAATTGCCATTGAT  
ACTGTCATTCTTGAGTGTATTTGATGTAAAGTGGAATGTGTCGTGTAGCGGTGAAATGCTT  
AGATATGACACAGAACACCCATTGCGAAGGCAGCTTACAAAATACTACTGACACTGAGG  
CACGAAAGCGTGGGGATCAAACAGGATTAGAAAACCCCTGGTAGTCC

>Otu430

CCAGCCTATGGGGGGCAGCAGTCGAGAATCTTCCACAATGGACGAAAGTCTGATGGAGCG  
ACGCCGCGTGGTTGATGAAGTCCCTTCGGGACGTAAAAACCTTTTATGGGGGAGGAAGTAA  
TTGACGTTACCCCATGAATAAGGGGCTCCTAACTCTGTGCCAGCAGGAGCGGTAATACAG  
AGGCCCAAGCGTTATCCGGAATCACTGGGCGTAAAGGGTGTGTAGGCGGTTCGTGTTAGT  
CTTTTGTCAAAGCTTTTCGGCTTAACCGAGAAAACGCAGGAGAAACGGCACGGCTTTGAG  
GATGCGAGAGGTAGAGGGAACCTCATAGTGTAGGGGTGAAATCCGTTGATATTATGGGGAA  
CACCAAATGCGAAGGCACTCTACTGGCGCATTCCTGACGCTGAGACACGAAAGCGTGGA  
ATCGAACGGGATTAGAGACCCGTGTAGTCC

>Otu431

CCAGCCTACGGGATGCAGCAGTCGAGGATCTTCGGCAATGGGCGCAAGCCTGACCGAGCG  
ACGCCGCGTGTGCGATGAAGGCCTTCGGGTGTAAAGCACTGTCGAGGGGGAGAAAGATC  
CGCAAGGATTTGATCTATCCCTGGAGGAAGCACGGGCTAAGTTCGTGCCAGCAGCCGCGG  
TAAGACGAACCGTGCAACGTTATTTCGGAATCACTGGGCTTAAAGGGCGCGTAGGCGGGT  
CATCAAGTCAGGGGTGAAATACTCCGGCCTAACCGGAGAACGGCTTCTGATACTGGTGAC  
CTCGAGGGATGTAGGGGCATGTGGAACCTCCGGTGGAGCGGTGAAATGCGTAGATATCGG  
AAGGAACGCCGTGGCGAAAGCGACGTGCTGGACATCTTCTGACGCTGAGGCGCGAAAGC  
CAGGGGAGCAAACGGGATTAGAAAACCCCTGTAGTCC

>Otu432

CCAGCCTATGGGATGCTGCAGTGGGGAATCTTTCGCAATGGGGGCAACCCTGACGCAGCC  
ATGCCGCGTGAATGATGAAGTCTTAGGATTGTAAATTCCTTTCAGCAGGGACGATAATG

ACGGTACCTGCAGAAGAAGCCCCGGCTAACTTCGTGCCAGCAGCCGCGGTAATACGAAGG  
GGGCTAGCGTTGCTCGGAATTACTGGGCGTAAAGGGCGCGTAGGCGGGTCGTTTAGTTAG  
AGGTGAAAGCCCAGGGCTCAACCCTGGAATTGCCTTTAATACTGGCGGCCTTGAGTATGA  
GAGAGGTGTGTGGAAGTCCGAGTGTAGAGGTGAAATTCGTAGATATTCGGAAGAACACCA  
GTGGCGAAGGCGACACACTGGCTCATTACTGACGCTGAGGCGCGAAAGCGTGGGGAGCAA  
ACAGGATTAGATACCCTCGTAGTCC

>Otu433

CCAGCCTATGGGGTGCAGCAGTAAGGAATATTGGTCAATGGAGGCAACTCTGAACCAGCC  
ATGCCGCGTGCAGGAAGACGGCCCTACGGGTTGTAAACTGCTTTTGTACCGGAATAAACC  
TTGATACGAGTATCGAGCTGAATGTACGGTAAGAATAAGGATCGGCTAACTCCGTGCCAG  
CAGCCGCGGTAATACGGAGGATCCAAGCGTTATCCGGATTTATTGGGTTTAAAGGGTGCG  
TAGGCGGCTTGTTAAGTCAGGGGTGAAAGGCGGTAGCTTAACTATCGGAGTGCCCTTGAT  
ACTGACGAGCTTGAATGCAGCTGAGGTAGGCGGAATGTGACAAGTAGCGGTGAAATGCAT  
AGATATGTACAGAACACCGATTGCGAAGGCAGCTTACTAAAGTGCGATTGACGCTGAGG  
CACGAAAGCGTGGGGATCAAACAGGATTAGATACCCTCGTAGTCC

>Otu434

CCAGCCTACGGGGCGCAGCAGTAGGGAATATTGGACAATGGGCGAAAGCCTGATCCAGCC  
ATCCCGCGTGAAGGATTAAGGCCCTATGGGTTGTAAACTTCTTTTCTCTGGGAATAAAAA  
CCGGTATTTATACTGGCTTGAAGGTACCAGAGGAATAAGCACCGGCTAACTCCGTGCCAG  
CAGCCGCGGTAATACGGAGGGTGCAAGCGTTATCCGGATTCCTGGGTTTAAAGGGTGCG  
TAGGTGGCTTTGTAAAGTCAGTGGTGAAAGCCCGGAGCTCAACTCCGGAAGTGCCATTGAT  
ACTGCTTAGCTTGAATCACGTCGAGGTGGATGGAATATTACATGTAGCGGTGAAATGCTT  
AGATATGTAATAGAACACCGATTGCGAAGGCAGTTCCTAGGCGTGTATTGACACTGAGG  
CACGAAAGCGTGGGGATCAAACAGGATTAGATACCCTGGTAGTCC

>Otu435

CCAGCCTACGGGTTGCTGCAGTAGGGAATATTGGACAATGGACGCAAGTCTGATCCAGCC  
ATCCCGCGTGAAGGATTAAGGCCCTCTGGGTTGTAAACTTCTTTTCTCTGGGAATAAAAA  
GCGGTATTCCTTATCGCCTTGAAGGTACCAGAGGAATAAGCACCGGCTAACTCCGTGCCAG  
CAGCCGCGGTAATACGGAGGGTGCAAGCGTTATCCGGATTCCTGGGTTTAAAGGGTGCG  
TAGGTGGTCTGTAAAGTCAGCGGTGAAAGCCTGGAGCTCAACTCCAGAATTGCCATTGAT  
ACTGACGGACTTGAATCAGGTTGAGGTGGATGGAATATTACATGTAGCGGTGAAATGCTT  
AGATATGTAATAGAACACCGATTGCGAAGGCAGTTCCTAAGCCTGCATTGACACTGAGG  
CACGAAAGCGTGGGGATCAAACAGGATTAGAAACCCTTGTAGTCC

>Otu436

CCAGCCTACGGGGGGCAGCAGTTAGGAATCTTGCGCAATGGGCGAAAGCCTGACGCAGCC  
ATGCCGCGTGAATGATGAAGGTCTTAGGATTGTAAATTCCTTTCAGCGGGGACGATAATG  
ACGGTACCCGCAGAAGAAGCTCCGGCTAACTTCGTGCCAGCAGCCGCGGTAATACGAAGG  
GGGCTAGCGTTGCTCGGAATTACTGGGCGTAAAGGGCGCGTAGGCGGACAGTTTAGTCAG  
AGGTGAAAGCCCAGGGCTCAACCTTGAAATGCCTTTGATACTGGCTGTCTTGAGTTCGG  
GAGAGGTGTGTGGAAGTCCGAGTGTAGAGGTGAAATTCGTAGATATTCGGAAGAACACCA  
GTGGCGAAGGCGACACACTGGCCCGATACTGACGCTGAGGCGCGAAAGCGTGGGGAGCAA  
ACAGGATTAGATACCCAGTAGTCC

>Otu437

CCAGCCTACGGGGGGGACCAGTGGGGAATCTTGACAATGGAGGAAACTCTGATGCAGCG  
ACGCCGCGTGAGCGATGAAGCCCTTCGGGGTGTAAAGCTCTTTCGGCAGGGAAGATTATG  
ACGGTACCTGCAGAAGCAGCTGCGGCTAACTACGTGCCAGCAGCCGCGGTAATACGTAGG  
CAGCAAGCGTTGTTCCGAGTTACTGGGCGTAAAGGGTGCGTAGGCGGTCTTTTAAGTTTG  
GTGTGAAATCTCCCGGCTCAACCGGGAGGGTGCGCCGAATACTGAGAGGCTAGAGTGTCTG  
GAGAGGTAAGTGGAATTCCTGGTGTAGCGGTGAAATGCGTAGATATCAGGAGGAACACCG  
GTGGTGTAAACGGCTTACTGGACGATAACTGACGCTGAAGCACGAAAGCGTGGGTAGCAA  
ACAGGATTAGATACCCTAGTAGTCC

>Otu438

CCAGCCTATGGGGTGTGCTGCAGTGGGGAATATTGGGCAATGGGCGAAAGCCTGACCCAGCC  
ACGCCGCGTGAGTGATGAAGGCCCTTCGGGTCGTAAAGCTCTGTGGGGAGGGACGAATAAG  
CACGGACCTAATACGTCCGGGCCCTGACGGTACCTCCTTAGCAAGCACCGGCTAACCATG  
TGCCAGCAGCCGCGGTAATACATGGGGTGCAAACGTTGCTCGGAATCATTGGGCGTAAAG  
CGCACGTAGGCGGCCACTTAAGTCGGATGTGAAATCCCTCGGCTTAACTGAGGAAGTGCA  
TCCGAAACTGAATGGCTTGAGTACGAAAGAGGGTTCGCGGAATTCCCGGTGTAGAGGTGAA

ATTCGTAGATATCGGGAGGAACACCGGCGGCGAAGGCGGCGACCTGGTTTCGAGACTGACG  
CTGAGGTGCGAAAGCGTGCGGGAGCAAACAGGATTAGATAACCCCGTAGTCC

>Otu439

CCAGCCTACGGGAGGCAGCAGCGACGAATATTCCGCAATGCACGAAAGTGTGACGGAGCA  
ATGCCGCGTGCAGGATGAAGCGGCTTCGCCGTGTAAACTGCTGTCAGGGGTGAGAAACAC  
TGATCGACCCCAAAGGAAGAGCCGGCTAACCTGTGCCAGCAGCCGCGTAATACAGGGG  
GCTCAAGCGTTAATCGGAATCACTGGGCTTAAAGGGTGCCTAGGCGGACGAGAAAGTGT  
CTGTGAAATCCCCCGGCTCAACCGGGGAATGGCGGGGCAAACCTTCTCGTCTTGAGGCAAG  
TAGAGGCTGTGGAACGCTAGGTGGAGCGGTGAAATGCGTAGAGATCTAGCGGAACGCCG  
AAGGTGAAGACAGGCAGCTGGGCTTGTCCTGACGCTCAGGCACGAAAGCGTGCGGGAGCAA  
ACGGGATTAGAGACCCGCGTAGTCC

>Otu440

CCAGCCTACGGGGGGCAGCAGTGGGGAATCTTGCGCAATGGGCGAAAGCCTGACGCAGCA  
ACGCCGCGTGAGGGACGAAGGCCTTCTGGGTTGTAAACCTCTTTCAGCAGGGACGATGAT  
GACGGTACCTGCAGAAGAAGCCCCGGCCAACTACGTGCCAGCAGCCGCGTAATACGTAG  
GGGCGAGCGTTGTCCGGATTATTGGGCGTAAAGAGCTCGTAGGCGGCTTAGCAAGTCG  
GGTGTGAAACCTCCAGGCTCAACCTGGAGCCGCCACTCGATACTGCTATGGCTAGAGTCC  
GGTAGGGGACCACGGAATTCCTGGTGTAGCGGTGAAATGCGCAGATATCAGGAGGAACAC  
CAGTGGCGAAGGCGGTGGTCTGGGCCGGTACTGACGCTGAGGAGCGAAAGCGTGCGGGAGC  
GAACAGGATTAGATAACCCAGTAGTCC

>Otu441

CCAGCCTACGGGGTGCTGCAGTGGGGAATATTGCACAATGGGCGAAAGCCTGATGCAGCG  
ACGCCGCGTGAGGGATGACGGCCTTCGGGTGTAAACCTCTTTCAGCAGGGACGAAGCGA  
AAGTGACGGTACCTGCAGAAGAAGCACCGGCCAACTACGTGCCAGCAGCCGCGTAATAC  
GTAGGGTGCAAGCGTTGTCCGGAATTATTGGGCGTAAAGAGCTCGTAGGCGGTTTGTGCG  
GTCGGCTGTGAAAACCTGGGGCTCAACCCCGGGCCTGCAGCCGATACGGGCAAGCTAGAA  
TTCGGTAGGGGAGACTGGAATTCCTGGTGTAGCGGTGAAATGCGCAGATATCAGGAGGAA  
CACCGGTGGCGAAGGCGGGTCTCTGGGCCGATATTGACGCTGAGGAGCGAAAGCGTGGGG  
AGCAAACAGGATTAGAGACCCCTCGTAGTCC

>Otu442

CCAGCCTATGGGGGGCACCAGGCGCGAAAACCTCCACAATGTACGGAAGTACGATGGGGTT  
ATCTCGAGTGCAGTCCGATAAGGGCTGCTTTTCCATAGAGTAATATCCTGTGGGAATAAG  
AGGGGGGCAAGACTGGTGTGACCGCCGCGGTAACACCAGCCCCTCGAGTGGTGGGGACT  
TTTATTTGGCCTAAAGCGTCCGTAGCTGGCTGTATCCGTCCCCCGTTAAATCCAGCGTCC  
TAAGCGTTGGACCGCGGGTGATACCATACAGCTAGAGGGTGGGATAGGTGAGCGGTATTT  
CTGGGGTAGGGGCGAAATCCTTTGATCCAGGAGGACCACCAGTGGCGAAGGCTGCTCAC  
TAGAACACGCCTGACGGTCAGGGACGAAAGCTGGGGCAGCGAACC GGATTAGATAACCGA  
GTAGTCC

>Otu443

CCAGCCTATGGGGTGACAGCAGTGGGGAATATTGGACAATGGGGGCAACCCTGATCCAGCA  
ATGCCGCGTGTGTGAAGAAGGCCTTCGGGTGTAAAGCACTTTTATCCGGAACGAAACGC  
GCAGGGTGAATATCCTTGCGAACTGACGGTACCGGAGGAATAAGCACCGGCTAACTTCGT  
GCCAGCAGCCGCGTAATACGAAGGTGCAAGCGTTACTCGGAATTACTGGGCGTAAAGG  
GTGCGTAGGTGGTTGTTTAAGTTTGCTGTGAAAGCCCCGGGCTCAACCTGGGAATGGCAG  
TGAATACTGGACAGCTAGAGTGCGGTAGAGGGTAGTGGAATTCCTGGTGTAGCAGTGAAA  
TGCGTAGAGATCGGGAGGAACACAGTGGCGAAGGCGGCTACCTGGACCAGCACTGACAC  
TGAAGCACGAAAGCGTGGGGAGCAAACAGGATTAGAAACCCAGTAGTCC

>Otu444

CCAGCCTACGGGTGGCTGCAGTCGAGAATTTTTTCAATGGACGAAAGTCTGATGGAGCG  
ACGCCGCGTGAGAGATGAAGGTTCTTGGAATTGTAAACTCCTGTCACTGCAGAACAAGGCT  
ACGCATATGAATAGTACGCGTAGTTGATGGTATGCGGAGAGGAAGGGACGGCTAACTCTG  
TGCCAGCAGCCGCGGTGAGACAGAGGTCCCGAGCGTTGTTCCGATTTCATTGGGCGTAAAG  
GGTGTGTAGGAGGTCAGGTAAGTCGTGTGTGAAATCTCAGAGCTTAACTCTGAAACTGCG  
CTCGATACTGCTTGGCTAGAGGATCGGAGGGGGTAACGGAATTTATGGTGTAGCAGTGAA  
ATGCGTAGATATCATAAGGAACACCGGTGGCGAAGGCGGTTACCTGGAAGATTCCTGACT  
CTGAAACACGAAAGCCAGGGGAGCAAACGGGATTAGAAACCCAGTAGTCC

>Otu445

CCAGCCTATGGGGGGCACCAGGTCATGGGAACGAGCACCTCATTATCCCGCATCTGGCGC

CGCAGACTCGCGATCGCCTGCTTGCCATGTTCGATGCCCCGAACGCGTGCCGCCCTGCGCC  
TGGATATAAAAACCATTCCTACTCGGGCGGCCTGAGTTCGCAACAACTTCAGCAATCTTCGCC  
GGCTGCGTGTATTTCGCATCCCAGCCCCACGGCGAGACAGGCTCCGACATTGGGATGGGT  
CCGAGGGCGAGCATGAGCCTGATCGCGTAGGCGTTATCGTAACAACCCGAAACCTATA  
ACGTGCACGCCGTCTTCGCCGCGTGCGATCTCATGCGCGACATAGCTCGCGCACTCCACG  
GTATAGATCACGAGGATGAGGTTCTGATTCCCTTTCTGCCGTCCTTGCGCAGAAAGCCT  
TGCCAGACGCGATTTGTCAATTCAGCTCATTCATAGGCAATATCATTAGATACCCGAGT  
AGTCC

>Otu446

CCAGCCTATGGGGCGCTGCAGTAGGGAATCTTCCGCAATGGGCGAAAGCCTGACGGAGCA  
ATGCCGCGTGAGTGATGAAGGTTTTTCGGATCGTAAAGCTCTGTTGCCAGGGAAGAACGCT  
TGGGAGAGTAACTGCTCTCAAGGTGACGGTACCTGAGAAGAAAGCCCCGGCTAACTACGT  
GCCAGCAGCCGCGTAATACGTAGGGGGCAAGCGTTGTCCGGAATTATTGGGCGTAAAGC  
GCGCGCAGGCGGTCAATTTAAGTCTGGTGTTTAATCCCGGGGCTCAACCCCGGATCGCACT  
GGAACTGGGTGACTTGAGTGCAGAAGAGGAGAGTGGAATTCCACGTGTAGCGGTGAAAT  
GCGTAGATATGTGGAGGAACACCAGTGGCGAAGGCGACTCTCTGGGCTGTAACTGACGCT  
GAGGCGCGAAAGCGTGGGGAGCAAACAGGATTAGAAACCCCTTGTAAGTCC

>Otu447

CCAGCCTATGGGGGGCAGCAGTCGAGGATCTTCGTCAATGGGCGCAAGCCTGAACGAGCG  
ACGCCGCGTGCGCGATGAAGGCCTTCGGGTGTAAAGCGCGAAAGTGGAGAGAAAGGGAA  
ACTTGATCAATCCACAGTAAGGACGGGCTAAGTTCGTGCCAGCAGCCGCGGTAAGACGAA  
CTGTCCTAACGTTGTTCCGAATCACTGGGCTTAAAGGGCGCGTAGGCGGTCCGACAAGTC  
AGGGGTGAAATCCTGCAGCTTAAGTGCAGAAAGTGCCTTTGATACTGTGCGTCTGGAGGGA  
GGTAGGGGTGTGTGGAACCTCCAGTGGAGCGGTGAAATGCGTTGATATTGGAAGGAACGC  
CGGAGGCGAAAGCGACGCACTGGACCTTTTCTGACGCTGAGGCGCGAAAGCTAGGGGAGC  
AAACGGGATTAGATACCCGAGTAGTCC

>Otu448

CCAGCCTACGGGGGGCAGCAGGTAGGAATCTTTTGCAATGCGCGCAAGCGTGACAAAAGCG  
AGCCAGAGTGCTTTTCAATTGAAAAGCTTTTGCCAAATCTAAAAATTTTGGCGAATAAGG  
ACTGGGTAAAGACTAGTGCCAGCCGCCGCGGTAATACTAGCGGTCCAAGTCGCAGCCATCA  
TTATTGGGTCTAAAACATCCGTAGCTTGTTTAATAAGTTCCTGTGAAATCTCATCTCTT  
AAGGATGAGGCGTGACAGGAATACTGCTAAGCTAGAGACTGGAAGACGTAGAAAGTATGT  
ATAAAGTAACGTTAAATGTGTTAATCTTATGCAGACTCACAATAGCGAAGGCATTCTAC  
GAGGACAGTTCTGACAGTAAAGGATGAAGGCTAGGGGCGCAAATGGATTAGAGACCCTC  
GTAGTCC

>Otu449

CCAGCCTATGGGGCGCTGCAGTCGAGGATATTTAGCAATGGGGGAAACCCTGACTATGTG  
ACGCCGCGTGAGGGATGAAGGTTTTTCGGATCGTAAACCTCTTTTCGATGGAGAAGAAGTCT  
TTAGCTCTAACATAGCTGAAGATTGACGGTACCCAGAGAAGAAGCCACGGCCAACCTCCGT  
GCCAGCAGCCGCGTAATACGGGGGTGGCAAGCGTTACTCGGATTTATTGGGTGTAAAGG  
ACAGGTAGGCGTTCTGCCAAGTTAGAAGTGAAATCCTAAGGCTTAACCTTAGAACTGCTT  
CTAAACTGGCGGAATTGAGGCTAGAAGAGAAGAGCGGAATTCCTCGGTGTAAAGGTGAAA  
TCTGTAGATATCGGGAGGAACACCAGTGGCGAAAGCGGCTCTTTGGTCTAGATCTGACGC  
TAACTGTGAAAGCTAGGGGAGCAAACAGGATTAGAAACCCAGTAGTCC

>Otu450

CCAGCCTACGGGGGGCAGCAGTGGGGAATATTGGGCAATGGGCGAAAGCCTGACCCAGCC  
ACGCCGCGTGAGTGATGAAGGCCTTCGGGTCTGTAAGCTCTGTGGGGAGGGACGAATAAG  
CTCGGTATTAATACCACCGGGCCCTGACGGTACCTCCTTAGCAAGCACCGGCTAACCCCTG  
TGCCAGCAGCCGCGTAATACAGGGGGTGCAAACGTTGCTCGGAATTATTGGGCGTAAAG  
CGCACGTAGGCGGTTCTGTTATGTCAGATGTGAAAGCCCTTGGCTCAACTGAGGAAGTGCA  
TCTGAAACTGGCGAGCTAGAGTATGTAAGAGGGTTCGCGGAATTCCCGGTGTAGAGGTGAA  
ATTCGTAGATATCGGGAGGAACACCAGTGGCGAAGGCGGCGACCTGGGACAATACTGACG  
CTGAGGTGCGAAAGCGTGGGGAGCAAACAGGATTAGATACCCTCGTAGTCC

>Otu451

CCAGCCTATGGGTGGCAGCAGTAAGGAATATTGGTCAATGGAGGCAACTCTGAACCAGCC  
ATGCCGCGTGACAGGAAGAAGGCCCTATGGGTCTGTAAGCTGCTTTTGTACCAGAGAAAACC  
CGAGTACGTGTACTCGGTTGATAGTATGGTAAGAATAAGCATCGGCTAACTTCGTGCCAG  
CAGCCGCGGTAAGACGAAGGATGCAAGCGTTATCCGGATTCATTGGGTTTAAAGGGTGCG

TAGGCGGACTGATAAGTCAGTGGTGAATCTCTCAGCTTAACTGAGAACTGCCATTGAT  
ACTGTTAGTCTAGAGTATAGATGACGTTGGCGGAATATGACATGTAGTGGTGAATACTT  
AGATATGTCATAGAACACCGATTGCGAAGGCAGCTAACGAACTATAACTGACGCTGAGG  
CACGAAAGTGCGGGGATCAAACAGGATTAGATACCCCCGTAGTCC

>Otu452

CCAGCCTACGGGAGGCAGCAGTCGAGGATCTTCGTCAATGGGCGCAAGCCTGAACGAGCG  
ACGCCGCGTGCGCGATGAAGGCCTTCGGGTGTAAAGCGCGAAAGTGGAGAGAAAGCGAA  
AGTTGATCAATCCACAGTAAGGACGGGCTAAGTTCGTGCCAGCAGCCGCGGTAAGACGAA  
CTGTCCTAACGTTGTTTCGGAATCACTGGGCTTAAAGGGCGCGTAGGCGGTCGAACAAGTC  
AGGGGTGAAATCCTGCAGCTTAACTGTAGAAGTGCCTCTGATACTGTTCTGTCTGGAGGGA  
GATAGGGGTGTGCGGAACTTCCAGTGGAGCGGTGAAATGCGTTGATATTGGAAGGAACGC  
CGGAGGCGAAAGCGGCGCACTGGATCTCTACTGACGCTGAGGCGCGAAAGCCAGGGGAGC  
AAACGGGATTAGATACCCTCGTAGTCC

>Otu453

CCAGCCTATGGGGCGCAGCAGTCAAGAATCTTGGTCAATGGGCGAAAGCCTGAACCAGCG  
ATGTCGCAGCGTGATGAAGGCTTATAGTCGTAAAGCGCCAAAGGATGGATACAGAATGAG  
ATGTCCATCCAGAGTAGCCCTGTGTAATCTCGGTGCCAGCACACGCGGTCATACCGAAAG  
GGCGAGGCATTCTTATTCGAAATGGGTGTAAAGAGTCATTAGGCGGACTTATCCAATCCT  
ATCTGAAAGAACGAGGCAAAACCTTAAGGGAGGATGGGTTGATTAGAAGTCTAGAGTATA  
GCAGGGGGTTCATGGAATGCTTGGCGTACCGATGGAATGGATTGATGCTAAGTGGAACTCC  
AATGGCGAAGGCAATGACCTGGGCTATTACTGACGCTGACTGACGAAAGTGTGGGGAGCA  
AAGTGGATTAGAAACCCGCGTAGTCC

>Otu455

CCAGCCTACGGGAGGCTGCAGTAGGGAATATTGCATAATGGGCGCAAGCCTGATGCAGCA  
ACGCCGCGTGTCGATGAAGGCCTTCGGGTCTGTAAGCACTTTTAGAGCGGATGAGGAAG  
GACAGTACGCTCTGAATAAGCCTCGGCTAACTACGTGCCAGCAGCCGCGGTAACACGTAG  
GAGGCGAGCGTTATCCGGATTTACTGGGCGTAAAGCGTGTGCAGGCGGTTGAGAAAGTTG  
GATGTGAAAGCTCCTGGCCTAACTGGGAGAGGTCGTTCAATACTACTTGAAGTAGAGAGTG  
GGAGAGGGAGGTGGAATTCCGGGTGTAGTGGTGAATGCGTAGATATCCGGAGGAACACC  
AGTGGCGAAAGCGGCCTCCTGGCCATTTCTGACGCTCATACACGAAAGCTAGGGGAGCG  
AACGGGATTAGAAACCCCTCGTAGTCC

>Otu456

CCAGCCTACGGGGGGCAGCAGTGGGGAATTTTGCGCAATGGGCGAAAGCCTGACGCAGCA  
ACGCCGCGTGAGTGATGAAGGCTTTCGGGTCTGTAAGCTCTGTCAAGGGGAAAGAAGTGT  
ATTGTGGTTAATACCCATGATACTTGACGGTACCCCTAAAGGAAGCACCGGCTAACTCCG  
TGCCAGCAGCCGCGGTAATACGGGGGGTGCAAGCGTTGTTTCGGAATTATTGGGCGTAAAG  
CGCGTGTAGGCGGTTTGTAAAGTCTGATGTGAAAGCCCTGGGCTCAACCCAGGAAGTGCA  
TTGGAACTGGCAGACTTGAATACGGGAGAGGGTAGTGGAATTCCTGGTGTAGGAGTGAA  
ATCCGTAGATATCAGGAGGAACACCGGTGGCGAAGGCGGCTGCCTGGACCGATATTGACG  
CTGAGACGCGAAAGCGTGGGTAGCAAACAGGATTAGAAACCCCCGTAGTCC

>Otu457

CCAGCCTATGGGAGGCTCCAGTGGGGAATTTTGCGCAATGGGCGAAAGCCTGACGCAGCA  
ACGCCGCGTGGGTGATGAAGGTCTTCGGATCGTAAACCCCTGTCGTGGGGACGAAGGTC  
GCATGTCTAATAGATGTGTGGCTTGACGGTACCCGGAGAGGAAGCCCCGGCTAACTCTGT  
GCCAGCAGCCGCGGTAATACAGAGGGGGCAAGCGTTATTTCGGAATTATTGGGCGTAAAGG  
GCGCGTAGGCGGTTTCGTTAAGTCAGATGTGTAATCCCCGAGCTCAACTTGGGAAGTGCAT  
CTGAGACTGGCGGGCTAGAGTACTGGAGAGGGTGGTAGAATTCACGTGTAGCGGTGAAA  
TGCGTAGAGATGTGGAGGAATACAGTGGCGAAGGCGGCCACCTGGACAGTAAGTACGCG  
TGAGGCGCGAAAGTGTGGGTAGCAAACAGGATTAGATACCCTCGTAGTCC

>Otu458

CCAGCCTATGGGTCGCAGCAGTGGGGAATTTTGGACAATGGGGGCAACCCTGATCCAGCC  
ATGCCGCGTGAGTGAAGAAGGCCTTCGGGTGTAAAGCTCTTTCGGCGGGGACAAAACGG  
CGACTGCGAATAACGGTCGTTAATGATGGTACCCGAAGAAGAAGCACCGGCTAACTACGT  
GCCAGCAGCCGCGGTAATACGTAGGGTGCAGCGTTAATCGGAATTACTGGGCGTAAAGC  
GTGCGCAGGTGGTTTCGTAAGTCAGATGTGAAAGCCCCGGGCTTAACCTGGGAATGGCAT  
TTGAGACTGCGAAGCTAGAGTACGGCAGAGGGAGGTGGAATTCACGTGTAGCAGTGAAA  
TGCGTAGATATGTGGAGGAACACCGATGGCGAAGGCAGCCTCCTGGGCCAGTACTGACGC  
TCATGCACGAAAGCGTGGGGAGCAAACAGGATTAGATACCCGAGTAGTCC

>Otu459

CCAGCCTATGGGGCGCAGCAGTGAGGAATATTGCACAATGGGAGAAATCCTGATGCAGCA  
ACGCCGCGTGAAATGATGAAGGTCTTCGGATCGTAAATTCCTTTTGTAAAGGGACGAATGTG  
CCGCTCTGTGGCATTGACGGTACCTTGCGAATAAGACACGGCTAACTCTGTGCCAGCAGC  
CGCGGTAATACAGAGGTGTCAAGCGTTGTCCGGATTTACTGGGTGTAAAGGGTGCGTAGG  
CGGTTATATAAGTCAGAGGTTAAAGCTCCTTGCTTAACAAGGAAATCGCTTTTGATACTG  
TATAACTTGAGTACTGAAAAGGAAGATGGAATTTCCGGTGTAGCGGTGGAATGCGTAGAT  
ATCGGAAAGAACACCAGCAGCGAAGGCAGTCTTCTGGTCAGTAACTGACGCTCATGCACG  
AAAGCGTGGGGATCAAACAGGATTAGATACCCCGTAGTCC

>Otu460

CCAGCCTATGGGGGGCTGCAGTAAGGAATATTGGTCAATGGACGCAAGTCTGAACCAGCC  
ATGCCGCGTGCAGGATGACAGCCCTATGGGTTGTAACTGCTTTTGTACGGAAAAAACC  
TCCGGTCGTGAACCGGAGCTGATGGTACCGTAAGAATAAGCATCGGCTAACTCCGTGCCA  
GCAGCCGCGGTAATACGGAGGATGCAAGCGTTATCCGGATTCATTGGGTTTAAAGGGTGC  
GCAGGCGGAATGATAAGTCAGTGGTGAAATCCTACAGCTTAACTGTAGAACTGCCATTGA  
TACTGTCGTTCTTGAGTACACTTGAAGTGGGCGGAATGTGTTCATGTAGCGGTGAAATGCT  
TAGATATGACACAGAACACCGATCGCGAAGGCAGCTCACTAAAGTGTTACTGACGCTCAT  
GCACGAAAGCGTGGGGATCAAACAGGATTAGAAACCCGAGTAGTCC

>Otu461

CCAGCCTATGGGAGGCAGCAGTAACGAATCTTCCGCAATGCACGAAAGTGTGACGGAGCG  
ACGCCGCGTGTGGGACGAAGCCCTTCGGGGTGTAACCCTGTCAAGAGATAGAAAGTTC  
TGATCATCTCTAGAGGAAGGCACGGCTAACTCTGTGCCAGCAGCCGCGGTAAGACAGAGG  
TGCCAAGCGTTAGGCGGAATCACTGGGCTTAAAGCGTGTGTAGGTGGACCTGTAAGTACC  
TTGTGAAATCCCACGGCTTAAACCGTGGAATGCTCGGTATACTGCGGGTCTTGAGGTACC  
TAGGGGCGAGTGGAACAAATGGTGGAGCGGTGAAATGCGTAGATATCATTTGGAACGCCA  
ATGGAGAAATCAACTCGCTGGGGGTATCCTGACACTGAGACACGAAAGCCAGGGGAGCAA  
ACGGGATTAGAGACCCTAGTAGTCC

>Otu462

CCAGCCTATGGGTTGCTCCAGTGGGGAATCTTGCGCAATGGGCGAAAGCCTGACGCAGCG  
ACGCCGTGTGTGCGATGAAGGTTTTTCGGATCGTAAAGCACTGTGCCCCGGGAAAAAGAAA  
TGATGGTACCGGGAGAGGAAGCACCGGCTAACTCTGTGCCAGCAGCCGCGGTAATACAGA  
GGGTGCGAGCGTTGTTTCGGAATTATTGGGCGTAAAGCGCTGGTAGGTGGCTTGTTAAGTC  
GCGTGTGAAATCTCCAGGCTCAACCTGGAAGTGC GCGCGGAACTGGCGAGCTTGAGTGC  
CGGAGAGGGTCGCGGAATTCCCAGTGTAGAGGTGAAATTCGTAGATATTGGGAGGAACAC  
CAGAGGCGAAGGCGGCGACCTGGAAGGTAACCTGACACTGAGCAGCGAAAGCGTGGGGAGC  
AAACAGGATTAGAGACCCTCGTAGTCC

>Otu463

CCAGCCTATGGGTGGCAGCAGTGAGGAATCTTGCGCAATGGGGGCAACCCTGACGCAGCA  
ACGCCGCGTGAGTGATGAAGGCCTTCGGGTCGTAAAGCTCTGTGAGATGGGAAGAAAGTT  
TCGGGCGTGAATAATTCCCGGAATTGACGGTACCGTCAGAGGAAGCACCGGCTAACTCCG  
TGCCAGCAGCCGCGGTAATACGGAGGGTGCAAGCGTTGTTTCGGAATTATTGGGCGTAAAG  
AGCGTGTAGGCGGCCGGGTAAAGTCAGATGTGAAAGCCCTTGGCTTAACCAAGGAAGTGCA  
TTTGAAACTGCCTGGCTTGAGTACGGGAGGGGGAAGTGGAATTCCCGGTGTAGAGGTGAA  
ATTCTGTAGATATCGGGAGGAACACCGGTGGCGAAGGCGGCTTCCTGGACCGATACTGACG  
CTGAGACGCGAAAGCGTGGGGAGCAAACAGGATTAGATACCCCGTAGTCC

>Otu464

CCGCCTATGGGGGGCAGCAGTGAGGAATATTGCACAATGGGCGAAAGCCTGATGCAGCGA  
CGCCGCGTGAGGATGACGGTCTTCGGATTGTAACTCCTGTTAAGTGTGAAAAAAGACT  
TGTTTTTAATAGAAGCAAGGGATGATAGTAACACTAGAGAAAGCACCGGCTAACTTCGTG  
CCAGCAGCCGCGGTAATACGAGGGGTGCAAACGTTATTTCGGAATCACTGGGCGTAAAGGG  
TGCGTAGACGGCAAATAAGTCAATTATTAAATCTCCTAGCTTAACTAGGAACTGTGAT  
TGAAACTGATTTGCTTGAGGATGGAAGAGAGAAGTGGAATTCTCGGAGTAGCGGTAAAT  
GCGTAGATCTCGAGAGGAACACCGATGGCGAAGGCAGCTTCTTGGTCCATTTCTGACGTT  
GAGGCACGAAAGCGTGGGGAGCAAACAGGATTAGAGACCCGAGTAGTCC

>Otu468

CCAGCCTACGGGAGGCAGCAGTCGAGAATATTGACAATGGGCGAAAGCCTGATCGAGCG  
ACGCCGCGTGCAGGATGAAGGCCTTCGGGTCGTAACTGCGGTAGTATGGTAACAATGCA  
AATGAGTGCCATACGGAAAGAGGTGGGTAACCTACGTGCCAGCACCAGCGGTAATACGTAG

ACCTCAAGCGTTATCCGGATTTATTGGGCGTAAAGCGCATGTAGGTGGTTTCGCGCGTCT  
TTTGTAAAGCCCACCGCCCAACGGTGGAGATGCAGGAGATACGGCGAGACTAGAGGGGG  
TTAGAGGTGCATAGAACGCACGGTGTAGGGGTGAAATCCGTTGATATCGTGCGGAATACC  
AAAGGCGAAGGCATTGCACTGGGACCTTCTGACATTGAGATGCGAAAGCGTGGGGAGCA  
AAAAGGATTAGAAACCTGGTAGTCC

>Otu470

CCAGCCTATGGGAGGCAGCAGTAAGGAATATTGGTCAATGGACGCAAGTCTGAACCAGCC  
ATGCCGCGTGGAGGATGAAGGTCCTCTGGATTGTAAACTTCTTTTATTGGGAAGAAACC  
ACCGATTTCTATTGGTGTGGACGGTACCAGATGAATAAGCACCGGCTAACTCCGTGCCAG  
CAGCCGCGGTAATACGGAGGGTGCAAGCGTTATCCGGATTCCTGGGTTTAAAGGGTGCG  
TAGGCGGGTTGGTAAGTCCGTGGTGAAATCTCCAAGCTTAACTTGGAAGTCCCGTGGAT  
ACTATCAATCTTGAATATCGTGGAGGTGAGCGGAATATGTCATGTAGCGGTGAAATGCTT  
AGATATGACATAGAACACCATTGCGAAGGCAGCTCGCTACACGGTTATTGACGCTGAGGC  
ACGAAAGCGTGGGGATCAAACAGGATTAGAGACCCCGTAGTCC

>Otu471

CCAGCCTATGGGATGCAGCAGTGGGGAATCTTGGACAATGAGTGAAAAGTCTGATCCAGCG  
ATATCACATGAGTGAAGAAGGCCATTTGGTTGTAAAGCTCTTTCGTTAACGAAGATAATG  
ACAGTAGTTAAAGTAAGAAGTCCTGGCAAATCCTGTGCCAGCAGCCGCGGTAATACAGGA  
GGGGCAAGCGTTATTCGGATTTAATGGGCGTAAAGGGTGCGTAGGCTATAGATTAGATTA  
AATATGAAATACCAAGGCTTAACCTTGGAACTGTATTTGAAATCGATTTATTTGAGTTAG  
ATAGAGGTTTGTAGAATTCTTAAAGTAAAGGTAATATTTTCGATATTAGGAGGAATACC  
TGAGGCGAAGGCGACATTCTGGATCTATACTGACGCTGAGGCACGAAAGCGTGGGGAGCA  
AACAGGATTAGATACCCTGGTAGTCC

>Otu473

CCAGCCTACGGGAGGCAGCAGTGGGGAATATTGGACAATGGGCGCAAGCCTGATCCAGCC  
ATGCCGCGTGAGTGATGAAGGCCTTAGGGTTGTAAAGCTCTTTTGTGAGGGAAGATAATG  
ACGGTACCTGAAGAATAAGCACCGGCTAACTTCGTGCCAGCAGCCGCGGTAATACGAAGG  
GTGCTTGCGTTGTTTCGGAATTACTGGGCGTAAAGCGCGCGTAGGCGGCTATCCAAGTCAG  
AGGTGAAAGCCCTGGGCTCAACCCAGGAATTGCCTTTGAAACTGTATAGCTAGAGTGTCG  
GAGGGGATAGCGGAATTCTTAATGTAGAGGTGAAATTCGTAGATATTAGGAGGAACACCG  
GTGGCGAAGGCGGCTATCTGGACGACAACCTGACGCTGAGGCGCGAAAGCACGGGGATCAA  
ACAGGATTAGAAACCCGAGTAGTCC

>Otu477

CCAGCCTACGGGTTGCTGTCAGTAGGGAATTTTCCACAGTGGGCGAAAGCCTGATGGAGCA  
ACGCCGCGTGAGGATGAAGGCCTTTGGGTTGTAAACTGCTTTTCTCCGTGAGGAATATG  
ACAGTAGCAGAGGAATAAGGATCGGCTAACTCCGTGCCAGCAGCCGCGGTCATACGGAGG  
ATCCAAGCGTTATCCGGAATTACTGGGCGTAAAGAGTTGCGTAGGCGGCAGAGTAAGCAT  
GGCATGAAAGCGTATGGCTCAACCATATATACATGTTGTGAACTGCTCAGCTAGAGGATG  
AGAGAGGTGGCTGGAATTCCCAGTGTAGGAGTGAAATCCGTAGATATTGGGAGGAACACC  
GATGGCGTAGGCAGGCCACTGGCTCATTCCTGACGCTCAGGCACGAAAGCGTGGGGAGCG  
ACCGGGATTAGAAACCCCGTAGTCC

>Otu479

CCAGCCTACGGGTGGCTGCAGCCGAGAATATTGCAACAATGGGCGAAAGCCTGATCGAGCG  
ACGCCGCGTGATGGATGAAGTGCTTCGGCATGTAAACATCTTTTATAGGCGAGAAAGTTT  
ATTGATCAGCCTAAGAATAAGGGGTTGCTAAACTCGTGCCAGCAGCAGCGGTAATACGAG  
TGCCCCAAGCGTTATCCGGAATCATTGGGCGTAAAGGGTGTGTAGGCGGTCTGGTTAGTC  
TTCTGTTAAATTCTTCGGCTTAACCGGGGCGATGCAGGGGAAACGGCCAACTAGAGGAT  
GCGAGAGGTGAATGGAATCATGGAGTAGGGGTGAAATCCGTTGATATCATGGGGAACAC  
CAAATGCGAAGGCAATTCCTGACGCTGAAACACGAAAGCGTAGGTAGC  
GAATGGGATTAGATACCCAGTAGTCC

>Otu480

CCAGCCTATGGGGGGCTGCAGTAGGGAATATTGCACAATGGAGGAACTCTGATGCAGCG  
ACGCCGCGTGAGTGACGAAGGACTTCGGTTCGTAAAGCTCTGTTGCAGGGGAATAACAAA  
ATGAAGGTACTCTGCGAGAAAGGTTCGGCTAACTTCGTGCCAGCAGCCGCGGTAAGACGA  
GGGACCCGAGCGTTGTTTCGGAATCATTGGGCGTAAAGCGGGTGTAGGTGGCTTTGTAAGT  
CAGGTGTGAAAGCCCAGGGCTTAACCTTGGAAAGTGCAATTTGATACTGCGAAGCTTGAGTG  
TGGGAGAGGTAAGTAGAATTCAGGTATAGTGGTGAAATACGTAGATATCTGGAGGAATA  
CCGGAGGCGAAGGCGGCTTACTGGCCCAACACTGACACTCAGACCCGAAAGCGTGGGGAT

CAAACAGGATTAGAAGCCCCGCGTAGTCC

>Otu481

CCAGCCTATGGGTTGCAGCAGTCGAGGATCTTCGGCAATGGGCGCAAGCCTGACCGAGCG  
ACGCCGCGTGTGCGATGAAGGCCTTCGGGTGTAAAGCACTGTCGAGGGGGATAAAGCCG  
CAAGTTGATTGATCCCTGGAGGAAGCACGGGCTAAGTTCGTGCCAGCAGCCGCGGTAAG  
ACGAACCGTGGGGACGTTGTTTCGGAATCACTGGGCTTAAAGGGCGCGTAGGCGGCAAACC  
AAGTCCGGGGTGAAAGCCCCCGGCTCAACCGGGGAAGTGCCTTGGATACTGGTTTGTCTCG  
AGGGGGGTAGGGGCAGAGGGAACCTCTGGTGGAGCGGTGAAATGCGTTGATATCAGAAGG  
AACGCCGCTGGCGAAAGCGCTCTGCTGGATCTCTACTGATGCTGAGGCGCGAAAGCTAGG  
GGAGCAAACGGGATTAGAAACCCTTGTAGTCC

>Otu482

CCAGCCTATGGGGGGCAGCAGTGGGGAATTTTGGACAATGGGCGCAAGCCTGATCCAGCC  
ATGCCGCGTGTGGGAAGAAGGCCTTCGGGTGTAAACCACTTTTGTGTCAGGGAAGAAACGG  
TCTGATCTAATACATTGGACTAATGACGGTACCTGAAGAATAAGCACCCGGCTAACTACGT  
GCCAGCAGCCGCGTAATACGTAGGGTGCAGCGTTAATCGGAATTACTGGGCGTAAAGC  
GTGCGCAGGCGGCTTTTGAAGACAGATGTGAAATCCCCGGGCTCAACCTGGGAAGTGCAT  
TTGTGACTGCATGGCTAGAGTACGGTAGAGGGGGATGGAATTCGCGGTGTAGCAGTGAAA  
TGCGCAGATATGCGGAGGAACACCGATGGCGAAGGCAATCCCCTGGACCTGTACTGACGC  
TCATGCACGAAAGCGTGGGGAGCAAACAGGATTAGATAACCCGTGTAGTCC

>Otu486

CCAGCCTACGGGGCGCTCCAGTGGGGAATTTTGCGCAATGGGCGAAAGCCTGACGCAGCA  
ACGCCGCGTGGGTGATGAAGGTCTTCGGATCGTAAACCCCTGTCGTCAGGGACGAAGGTT  
ACGGGTTGAATATTCCCCTGACTTGACGGTACCTGGAGAGGAAGCCCCGGCTAACTCTGT  
GCCAGCAGCCGCGTAATACAGAGGGGGCAAGCGTTATTCGGAATTATTGGGCGTAAAGG  
GCGCGTAGGCGGTGTTTTAAGTGAGATGTGCAATCCCCGAGCTTAACTTGGGAAGTGCAT  
CTCAGACTGGAACGCTAGAGTACTGGAGAGGGTGGTAGAATTCACGCTGTAGCGGTGAAA  
TGCGTAGAGATGTGGAGGAATACAGTGGCGAAGGCGGCCACCTGGACAGTAACTGACGC  
TGAGGCGCGAAAAGTGTGGGTAGCAAACAGGATTAGAAACCCGGGTAGTCC

>Otu487

CCAGCCTATGGGGGGCACCAGGCGCGAAAACCTTTACAATGCGGGCAACCGTGATAAGGAA  
ACCCCGAGTGCCAGCACAGGCTGGCTGTCCACCAGTGTAACCACTGGTGAAGAAAGGGC  
CGGGCAAGACCGGTGCCAGCCGCCGCGTAATACCGGCGGCTCGAGTGGTGGCCGCTTTT  
ACTGGGCTTAAAGGTTCCGTAGCTGGATTGACAAGTCCCTTGAGAAATCTATCGGCTTAA  
CTGATAGGCGTTCAGGGGATACTGTTATTCTAGGGACCGGAGAGGTGAGAGGTACTGCC  
GGGGTAGGAGTGAAATCCTGTAATCCCGGTGGGACGACCTATGGCGAAGGCATCTCACCA  
GAACGGCTCCGACAGTGAGGGACGAAAGCTGGGGGAGCAAACCGGATTAGAAACCCCTGT  
AGTCC

>Otu488

CCAGCCTATGGGTGGCTGCAGTTCGGAATATTCGGCAATGGACGAAAGTCTGACCGAGCG  
ACGCCGCGTGCAGGATGAAGGCCCTTTGGGTGTAAACCGCTGTCACAGGTGAGCAAATC  
ATGTCCGGTGAACAATCGGATGTGTTGAGTTAAGCTTGAGAGGAAGCCCCGCTAATCAC  
GTGCCAGCAGCGGCGTAATACGTGAGGGGCGAACGTTGTTTCGGTGTCACTGGGCCTAAA  
GGGCGCGTAGGTGGCTGCGTAAGTAAGGTGTGAAAGCCCTCGGCTTACCCGGGGAATTGC  
GCCTTATACTGCGTGGCTTGAGGATTTTACGGGGAAGGGGGAAGTCCGAGTGTAGCGGTGA  
AATGCGCAGATATTTCGGGGGAAGGCCGCGCGCAAGGCGCCCTTCTGGGAAATTCTGAC  
ACTGAGGCGCGAAAGCGTGGGGAGCAAACAGGATTAGATAACCCCTCGTAGTCC

>Otu489

CCAGCCTACGGGTCGCAGCAGTAAGGAATATTGGACAATGGTGGCAACACTGATCCAGCC  
ATGCCGCGTGCAGGATGAAGGCGCTACGCGTTGTAACTGCTTTTGTACGGGAGAAAACC  
TATCTACGTGTAGATAGCTGATAGTACCGTAAGAATAAGCATCGGCTAACTACGTGCCAG  
CAGCCGCGGTAATACGTAGGGTGCGAGCGTTAATCGGAATTACTGGGCGTAAAGCGTGCG  
CAGGCGGTTGTGTAAGACAGGTGTGAAATCCCCGGGCTTAACCTGGGAAGTGCCTTGTG  
ACTGCACGACTGGAGTACGGCAGAGGGGGGTGGAATTCACGCTGTAGCAGTGAAATGCGT  
AGAGATGTGGAGGAACACCGATGGCGAAGGCAGCCCCCTGGGCTAGTACTGACGCTCATG  
CACGAAAGCGTGGGTAGCAAACAGGATTAGATAACCCAGTAGTCC

>Otu492

CCAGCCTACGGGAGGCTCCAGTAGGGAATCTTCCACAATGGGCGAAAGCCTGATGGAGCA  
ACGCCGCGTGCAGGATGAATGCCTTAGGGTTGTAACTGCTTTTATCTGTGACGAATATT



ACGGTAGCAGATGAATAAGGATCGGCTAACTCCGTGCCAGCAGCCGCGGTGCATACGGAGG  
ATCCAAGCGTTATCCGGAATTACTGGGCGTAAAGAGTTGCGTAGGTGGCAGAGTAAGTTG  
GTAGTGAAAGAGTTTCGGCTCAACCGAATAGACATTATCAAACTGCTTAGCTAGAGGATG  
AGAGAGGTTATTGGAATTTCCAGTGTAGGAGTGAAATCCGTAGATATTGGGAGGAACACC  
GATGGCGTAGGCAGATAACTGGCTCATTCCTGACACTAAGGCACGAAAGCGTGGGGAGCA  
AACGGGATTAGAGACCCGCGTAGTCC

>Otu493

CCAGCCTACGGGTCGCACCAAGTGGGGAATATTGGACAATGGGCGCAAGCCTGATCCAGCC  
ATGCCGCGTGATGATGAAGGCCCTAGGGTTGTAAAGTCCTTTCGGCGGGGAAGATAATG  
ACGGTACCCGCAGAAGAAGCCCCGGCTAACTTCGTGCCAGCAGCCGCGGTAATACGAAGG  
GGGCTAGCGTTGCTCGGAATGACTGGGCGTAAAGGGCGCGTAGGCGGATTGTACAGTCAG  
ATGTGAAATTCCCGGGCTTAACCTGGGGGCTGCATTTGATACGTATAGTCTTGAGTGAGG  
AAGAGGGTTGTGGAATTTCCAGTGTAGAGGTGAAATTCGTAGATATTGGGAAGAACACCG  
GTGGCGAAGGCGGCAACCTGGTCCTTTACTGACGCTGAGGCGCGAAAGCGTGGGGAGCAA  
ACAGGATTAGAAACCCGCGTAGTCC

>Otu494

CCAGCCTACGGGGGGGCAGCAGTAACGAATCTTCCGCAATGCACGAAAGTGTGACGGAGCG  
ACGCCGCGTGTAGGACGAAGCCCTTCGGGGTGTAACTACTGTCAGGGGTTAGAAAGTTC  
TGATCAACCCAGAGGAAGGCACGGCTAACTCTGTGCCAGCAGCCGCGGTAAGACAGAGG  
TGCCAAGCGTTAGGCGGAATCACTGGGCTTAAAGCGTGTGTAGGCGGATTCTTAAGTACC  
TTGTGAAATCCCACGGCTCAACCGTGGAAGTGCCTTGGTATACTGGGTGTCTTGAGCTACT  
TAGGGGCGACTGGAACAAATGGTGGAGCGGTGAAATGCGTAGATATCATTTGGAATGCCA  
ATGGTGAAAACAGGTCGCTGGGAGTATGCTGACGCTGAGACACGAAAGCCAGGGGAGCGA  
ACGGGATTAGATACCCGTGTAGTCC

>Otu495

CCAGCCTACGGGAGGCAGCAGTCGAGAATCTTCCGCAATGGGCGCAAGCCTGACCGAGCG  
ACGCCGCGTGAGAGGACGAAGGCCCTTCGGGGTGTAACTCCTGTGAGGGGGAGGAAGCCG  
CAAGGTTGACCGATCCCTGGAGGAAGCACGGGCTAAGTTCGTGCCAGCAGCCGCGGTAAG  
ACGAACCGTGCGAACGTTATTTCGGAATCACTGGGCTTAAAGCGCGTGTAGGCGGGAAGGC  
ACGTGCGTTGCTGAAATCCCCCGGCTCAACCGGGGAACGGGCACCGATACGACCTTCCTA  
GAGGGGGGTAGGGGGAGCTGGAAGTTCGGGTGGAGCGGTGAAATGCGTTGAGATCGGAAG  
GAACGCCCGTGCGGAAAGCGAGCTCCTGGACCCTTACTGACGCTGAGACGCGAAAGCCAG  
GGGAGCGAACGGGATTAGATACCCCTGTAGTCC

>Otu500

CCAGCCTACGGGATGCTCCAGTGGGGAATCTTGACAATGGGGGCAACCCTGATGCAGCG  
ACGCCGCGTGAGCGATGAAGCCCTTCGGGGTGTAAAGCTCTTTCGTCAGGGAAGAAACAG  
ACGGTACCTGGAGAAGCAGCTGCGGCTAACTACGTGCCAGCAGCCGCGGTAATACGTAGG  
CAGCGAGCGTTGTTTCGAGTTACTGGGCGTAAAGGGTGTGCAGGCGGTTCTTTAAGTTTG  
TTGTGAAATCTCCCGGCTTAACCGGGAGGGTGCGGCGAATACTGAGGGACTAGAGTATGG  
GAGAGGAAAGTGGAATTCCTGGTGTAGCGGTGAAATGCGTAGATATCAGGAGGAACACCG  
GTGGTGTAGACGGCTTTCTGGACCATAACTGACGCTGATGCACGAAAGCTAGGGGAGCAA  
ACAGGATTAGATACCCTGTAGTCC

>Otu501

CCAGCCTATGGGGCGCTGCAGTCGAGGATTTTTCTCAATGGGGGAAACCCTGAAGGAGCG  
ACGCCGCGTGAGGGATGAAGTCTTCGGATTGTAAACCTCTGTCATCTGGGAACAATGTA  
ATCTACCTAACACGTGGATTATTGATAGTACCGGAAGAGGAAGCCGTGGCTAACTCTGTG  
CCAGCAGCCGCGGTAATACAGAGACGGCGAGCGTTGTTTCGATTTCATTGGGCGTAAAGGG  
TGCGCAGGCGGTTTCGTTAAGTCGGATGTGAAAGCTCACAGCCTAACTGTGATAGGTCATT  
CGAACTGGCGGACTCGAGGGCTGGAGAGGAGACTGGAATAGTCGGTGTAGCGGTGAAAT  
GCGTAGAGATCGACTAGAACACCGGTGGCGAAGGCGGGTCTCTGGACAGTTCCTGACGCT  
CATGCACGAAAGCCAGGGGAGCAAACGGGATTAGAGACCCTTGTAGTCC

>Otu504

CCAGCCTACGGGAGGCTCCAGGAGGCCGACGAATCCCAGCTTTGGCTGGAAGTGCCTCCG  
GAAGAGTGTGCTATCGAACCAGGTTTACCCAATCTTTGGAGCAGGAGTCTTCGGAGTTT  
ATCGCCATCTTCACCACGATGATCAACAAAACCAAAGGAAAAGGCTGAAAACCAAAGCAG  
AAAGCTGAAACATGGAAAGTTGAATAAATTTCTGTTTTCTGCTTTCCGAATTTCTTTTTT  
TACCCTTGGTTAATGTCCTTGGCCCGTGAAGCCCTCGGTTTGCTACTTCACAGGCCGAGA  
CCCGTGAAGCCTGCATTTGATGCTTCACCGGGCAGCGCATCAGCTCTATAAAAGACCCGG

TACATAAAATGCTATTTTATATTCTTGAACGAGTTGAAGGAGCGCAGCACTATTACGGCT  
GTTGCAACCAAGTAGCGGACACGATTATGAACGCGAACGGAGCGATTAGATACCCTAGTA  
GTCC

>Otu505

CCAGCCTATGGGGGGCTGCAGTCGAGGATCTTCGGCAATGAGCGCAAGCTTGACCGAGCG  
ACGCCGCGTGTGCGATGAAGGCCTTCGGGTGTAAAGCACTGTCGAGGGGGAGAAAAGGG  
TAAAACCTTGATCTATCCCTGGAGGAAGCACGGGCTAAGTTCGTGCCAGCAGCCGCGGTA  
AGACGAACCGTGCGAACGTTGTTTCGGAATCACTGGGCTTAAAGGGCGCGTAGGCGGGCTG  
TCAAGTCTGGGGTGAAATCCCGCGGCTCAACCGTGGAACGCCTTAGATACTGACGGCCT  
CGAGGGAGGTAGGGGCGAGCGGAACGTGTGGGTGGAGCGGTGAAATGCGTTGATATTACAA  
GGAACCTCCGGTGGCGAAGGCGGCTCGCTGGCCCTCTTCTGACGCTGATGCGCGAAAGCTA  
GGGGAGCAAACGGGATTAGAAACCCCCGTAGTCC

>Otu507

CCAGCCTATGGGTTGCTGCAGTGGGGAATCTTGCGCAATGGGCGAAAGCCTGACGCAGCA  
ACGCCGCGTGGAGGACGAAGGCTTTCTGAGTTGTAAACTCCTTTTCAGCAGGGACGATTGT  
GACGGTACCTCCAGAAGAAGCCCCGGCTAACTACGTGCCAGCAGCCGCGGTAATACGTAG  
GGGGCAAGCGTTGTCCGGATTTATTGGGCGTAAAGAGCGTGTAGGCGGCCAGATAGGTCT  
GTTGTGAAACTCGAGGCTCAACCTCGAGACGCCGATGGAAACCATTGCTAGAGTCCG  
GAAGAGGAGAGTGAATTCTTGGTGTAGCGGTGAAATGCGCAGATATCAGGAAGAACACC  
CGTGGCTAAGGCGGCTCTCTAGTACGGTACTGACGCTGAGACGCGAAAGCGTGGGGAGCG  
AACAGGATTAGAAACCCCCGTAGTCC

>Otu508

CCAGCCTACGGGTTGCTGCAGTGGGGAATCTTGCGCAATGCGCGAAAGCGTGACGCAGCA  
ACGCCGCGTGGGGGAAGACGGCCTTCGGGTGTAAACCCCTTTTCAGTTGGGACGAAGCCC  
AGCCGGTTAATAGCCGGTATGGGTGACGGTACCTTCACAAGAAGCACCGGCTAACTACGT  
GCCAGCAGCCGCGGTAATACGTAGGGTGCAAGCGTTGTCCGGAATTATTGGGCGTAAAGA  
GCGTGTAGGTGGTCTGATCAGTCCGCTGTGAAAGCCCAGGGCTCAACCCCTGGAATGCCGG  
TGGATACTGTCAGACTTGAGTCCGGAAGGGGCGAGTGGAATTCCTGGTGTAGCGGTGAAA  
TGCGCAGATATCAGGAGGAACACCTATGGCGAAGGCAGCTCGCTGGGACGGTACTGACGC  
TGAGACGCGAAAGCGTGGGGGTCAAACAGGATTAGATACCCGAGTAGTCC

>Otu509

CCAGCCTACGGGTGGCTCCAGTGGGGAATCTTGCAACAATGGGGGAAACCCCTGATGCAGCG  
ACGCCGCGTGAGTGATGAAGCCCTTCGGGTGTAAAGCTCTTTTCGACGGGAACGATAATG  
ACGGTACCCGGAGAAGAAGCTGCGGCTAACTACGTGCCAGCAGCCGCGGTAATACGTAGG  
CAGCAAGCGTTGTTTCGGAATTACTGGGCGTAAAGCGAGTGTAGGTGGTGTATAAGTTTG  
GTGTGAAATCTCCCGGCTCAACTGGGAGGGTGCGCCGAAGACTGTAGTGCTAGAGTGTGG  
GAGAGGTAGGCGGAATTCCTGGTGTAGCGGTGAAATGCGTAGATATCAGGAGGAACACCT  
GCGGTGTAGACGGCTTACTGGACCACGACTGACACTGAAACTCGAAAGTGTGGGGAGCAA  
ACAGGATTAGATACCCTAGTAGTCC

>Otu510

CCAGCCTATGGGGGGCAGCAGTGGAGAATCTTGCGCAATGGGCGAAAGCCTGACGCAGCA  
ACGCCGCGTGTGTGATGAAGGTCTTCGGATCGTAAAGCACTGTCGCGAGGGAAGATACAC  
TTCACCATAAATACGGTGAGGATAAGACGGTACCTCGAGAGGAAGCACCGGCTAACTCTGT  
GCCAGCAGCCGCGGTAATACAGAGGGTGCGAGCGTTGTTTCGGAATTATTGGGCGTAAAGC  
GCTTGTAGGCGGCTTGTCAAGTCTCGTGTGAAATCCCCAGGCTTAGCCTGGGAAGTGCGC  
GGGAAACTGGCGAGCTTGAGTGCCGGAGAGGGTCGCGGAATTCCTGGTGTAGAGGTGAAA  
TTCGTAGATATCGGGAGGAACACCACTGGCGAAGGCGGCGACCTGGACGGACACTGACGC  
TGAGACGCGAAAGCGTGGGGAGCAAACAGGATTAGAGACCCCTCGTAGTCC

>Otu511

CCAGCCTATGGGGGGCTGCAGTCGAGGATCTTCGGCAATGGGCGCAAGCCTGACCGAGCG  
ACGCCGCGTGTGCGATGAAGGCCTTCGGGTGTAAAGCACTGTCGAGGGGGAGGAAGCCC  
GCAAGGGTTGACTAATCCCTGGAGGAAGCACGGGCTAAGTTCGTGCCAGCAGCCGCGGTA  
AGACGAACCGTGCGAACGTTGTTTCGGAATCACTGGGCATAAAGGGCGCGTAGGCGGGTCA  
TAAAGTCCGTGGTGAAAGCCCCCAGCTTAACTGGGGAAGTGCTTCGGTACTGATGGTCT  
CGAGTGGGGTAGGGGCATGCGGAACCTCCGGTGGAGCGGTGAAATGCGTAGATATCGGAA  
GGAACGCCGGTGGCGAAAGCGGCGTGCTGGACCCCAACTGACGCTGAGGCGCGAAAGCCA  
GGGGAGCAAACGGGATTAGAAACCCGAGTAGTCC

>Otu513

CCAGCCTATGGGGGGCAGCAGTGGGGAATATTGGACAATGGGGGAAACCCTGATCCAGCC  
ATGCCGCGTGTGTGATGAAGGCCCTTCGGGTGTAAAGCACTTTCGCACGTGACGATGATG  
ACGGTAACGTGAGAAGAAGCCCCGGCTAACTTCGTGCCAGCAGCCGCGGTAATACGAAGG  
GGGCAAGCGTTGTTTCGGAATTACTGGGCGTAAAGGGCGCGTAGGCCGGTGTACTAAGTTAG  
GCGTGAAAGCCCTGGGCTCAACCCGGGAATTGCGCTTGATACTGGTACGCTAGAATCCAG  
GAGAGGTTTCGTGGAATTCCTGGTGTAGAGGTGAAATTCGTAGAGATTGGGAAGAACACCG  
GTGGCGAAGGCGGCCAACTGGACTGGTATTGACGCTGAGGCGCGAAAGCGTGGGGAGCAA  
ACAGGATTAGATACCCGCGTAGTCC

>Otu517

CCAGCCTACGGGAGGCAGCAGTGGGGAACCTTGCGCAATGGACGAAAGTCTGACGCAGCC  
ACGCCGCGTGAGTGAAGAAGGCCCTTCGGGTGTAAAGCTCTGTGCGGCGGGACGAAAATA  
CTTAGGGTGAATAGCCCTAGGGACTGACGGTACCGCCAAAGGAAGCACCGGCTAACTTCG  
TGCCAGCAGCCGCGGTAATACGAGGGGTGCAAGCGTTGCTCGGAATTATTGGGCGTAAAG  
GGTAGGTAGGTGGTCTCGTTTGTCTGGGGTGAAATCCTTGAGCTTAACTCAAGAAGTGCC  
CTAGAAACGGCGAGACTAGAGTTCTGGAGAGGGTTCGTGGAATTCCTGGTGTAGCGGTGAA  
ATGCGTAGAGATCGGGAGGAACACCAGAGGCGAAGGCGGCGACCTGGACAGATACTGACA  
CTCAACTACGAAAGCGTGGGGAGCAAACAGGATTAGAAACCCCGGTAGTCC

>Otu518

CCAGCCTATGGGTGGCAGCAGTGGGGAATCTTGCGCAATGGGCGAAAGCCTGACGCAGCG  
ACGCCGCGTGTCGATGAAGGTCTTCGGATCGTAAAGCACTGTGCGAGGGAAGAAACCT  
GACGGTACCTCGAGAGGAAGCACCGGCTAACTCTGTGCCAGCAGCCGCGGTAATACAGAG  
GGTGCGAGCGTTGTTTCGGAATTATTGGGCGTAAAGCGCTGGTAGGTGGCTGTCAAGTCG  
CGTGTGAAAGCTCCCGGCTCAACCGGGAAAGTGCGCGCGAAACTGGCTGGGCTTGAGTGC  
CGGAGAGGGTTGCGGAATTCCTGGTGTAGAGGTGAAATTCGTAGATATCGGGAGGAACAC  
CAGAGGCGAAGGCGGCAACCTGGAAGGTGACTGACACTGAGCAGCGAAAGCGTGGGTAGC  
AAACAGGATTAGATACCCGAGTAGTCC

>Otu520

CCAGCCTATGGGGTGCACCAGTCGAGAATATTTCGACAATGGGCGAAAGCCTGATCGAGCG  
ACACCGCGTGACAGGATGAAGGCCCTTCGGGTGCTAAACTGCGGTAGATAATTAACAATGTA  
AATGAGTGATTATCGGAAAGAGGTGGGTAACCTACGCGCCAGCACCAGCGGTAATACGTAG  
ACCTCAAGCGTTATCCGGACTTATTGGGCGTAAAGAGCATGTAGGAGGTTTCGCGCGTCT  
TTTGTAAAGCCCACCGCCCAACGGTGAAGTGACAGGAGATACGGCGGGACTAGAGGAGG  
TTAGAGGTGCATGGAATCAGCGTGTAGGGGTGAAATCCGTTGATATCGTGGGGAACACC  
AAAGGCGAAGGCAGTGCCTGGGACCTTCCTGACTCTGAGATGCGAAAGCGTGGGGAGCA  
AAAAGGATTAGAGACCCTAGTAGTCC

>Otu521

CCAGCCTATGGGTCGCTCCAGTGGGGAATTTTACGCAATGGGCGAAAGCCTGACGTTGCG  
ACACCGCGTGAGCGAAGAAGCCCTTTGGGGTGTAAGCTCTGTGCGCTGGGACGAAAAAA  
ATGACGGTACCAGCAAAGGAAGCATCGGCTAACTACGTGCCAGCAGCCGCGGTAAGACGT  
AGGATGCAAGCGTTGTCCGGATTTATTGGGCGTAAAGAGTTCGTAGGTGGTTTGTAAAGT  
CTGATGTTAAAGATCGGGGCTCAACCCCGGGAGTGCATTGGATACTGGCAGACTTGAGTG  
CAGTAGAGGTAAGTGAATTCCTAGTGTAGCGGTGAAATGCGTAGATATTGGGAAGAACA  
CCAGTGGCGTAGGCGACTTACTGGGCTGTAACCTGACACTGAGGAACGAAAGCCAGGGGAG  
CAAATGGGATTAGATACCCCTCGTAGTCC

>Otu524

CCAGCCTATGGGATGCAGCAGTTTCGAATCATTCACAATGGGCGAAAGCCTGATGGTGCG  
ACACCGCGTGGGGGATGAAGGTCTTCGGAATGTAAACCCCTGTCACCGGGGAAGAAACGC  
TTCAATTTAACAGACTGAAGCCTGACTTAACCCGGAGAGGAAGCAGTGGCTAACTCTGTG  
CCAGCAGCCGCGGTAATACAGAGACTGCAAGCGTTATTTCGATTCACTGGGCGTAAAGGG  
TGCGCAGGCGGCCAAGTGTGTAGATGTGAAATCCCGGGGCTCAACCCCGGAAGTGCCTC  
TAAACTACTTGGCTAGAGCATTTGGAGAGGGTAGCGGAATTCACGGTGTAGCAGTGAAAT  
GCGTAGATATCGTGAGGAACACCAGAGGCGAAGGCGGCTACCTGGACAATTGCTGACGCT  
CAGGCACGAAAGCGTGGGGAGCAAAGGGATTAGATACCCCTGTAGTCC

>Otu525

CCAGCCTACGGGTGGCACCAGTCGAGAATTTTTCTCAATGGGGGAAACCCTGGAGGAGCG  
ACGCCGCGTGAAGGATGAAGGTCTTCGGATTGTAAACTTCTGTCAATTAGAGAACAAGTGC  
CGCCGAGTAACTACCGGCGGCTTGATAGTACCTGAAGAGGAAGAGACGGCTAACTCTGTG  
CCAGCAGCCGCGGTAATACAGAGGTCTCAAGCGTTGTTTCGATTCAATTGGGCGTAAAGGG

TGCGTAGGTGGCGAGGTAAGTTGGATGTGAAATCCCGGGGCTTAACCCCGGAACTGCATT  
CAATACTGCCTTGCTCGAGTACTGGAGAGGAGGTTGGAATTTACGGTGTAGCAGTGAAAT  
GCGTAGATATCGTAAGGAAGACCGGTGGCGAAGGCGGATCTCTGGACAGTAACTGACACT  
GAGGCACGAAGGCCAGGGGAGCAAACGGGATTAGAGACCCGCGTAGTCC

>Otu526

CCAGCCTACGGGGTGCACCAGTGGGGAATCTTGCGCAATGCGCGAAAGCGTGACGCAGCA  
ACGCCGCGTGAGTGAAGACGGCCTTCGGGTGTAAAGCTCTTTCAGTTGGGACGAAGCTT  
TGCCGGTTAATAGCCGGTCGGAGTGACGGTACCTTCAGAAGAAGCCCCGGCTAACTACGT  
GCCAGCAGCCGCGGTAATACGTAGGGGGCGAGCGTTGTCCGGAATCATAGGGCGTAAAGC  
GCGTGTAGGCGGCTTGGAAGTCTGCTGTGAAAGTCCAGGGCTCAACCCTGGAATGCCGG  
TGGAACCTATCAAGCTAGAGTCCGGAAGGGGAGTGTGGAATTCCTGGTGTAGCGGTGAAA  
TGCGCAGATATCAGGAGGAACACCAATGGCGAAGGCAGCACTCTGGGACGTGACTGACGC  
TGAGACGCGAAAGCGTGGGGAGCAAACAGGATTAGAACCCCGTAGTCC

>Otu527

CCAGCCTATGGGGGGCAGCAGTGGGGAATCTTGCGCAATGGGCGAAAGCCTGACGCAGCA  
ACGCCGCGTGAGCGAAGAAGGCCTTCGGGTGTAAAGCTCTGTCAGGGGGAAAGAAGGCA  
CCTGGGTTAATAGCCCAAGGGCTGACGGTACCTCCAAAGGAAGCCACGGCTAACTACGTG  
CCAGCAGCCGCGGTAATACGTAGGTGGCGAGCGTTGTCCGGAATCATTGGGCGTAAAGAG  
CGCGTAGGTGGCTTGTTAGGTCTGGTGTGAAATCTTGGGGCTCAACCCCAAGCGTGCACT  
GGAAACCGGCTTGCTAGAGTCTGGGAGAGGAGAGTGAATTCCTGGTGTAGCGGTGAAAT  
GCGTAGATATCAGGAGGAACACCGGTAGCGAAGGCGGCTCTCTGGAACAGTACTGACGCT  
GAGGCGCGAAAGCTAGGGGAGCGAACAGGATTAGAGACCCGTGTAGTCC

>Otu528

CCAGCCTACGGGGGGCTCCAGTCGAGAATCATTTGCAATGGACGAAAGTCTGACAATGCG  
ACGCCGCGTGACAGGAGGAAGGCCTTCGGGTGTAAACTGCTGTCAGGGGTTATGAACGTC  
ACGGGACTAACACTTCTGTGATCTGACAAAGGCCCCAGAGGAAGCTCCGGCTAAATCCGT  
GCCAGCAGCCGCGGTAATACGGATGGAGCAAGCGTTGTTCCGGAATCACTGGGCATAAAGC  
GCATGTAGGCGGCTCTGAAAGTAGGGTGTGAAATCCCCTGGCCCACCCAGGGAACTGCAT  
TCTAAACTTCAGGGCTTGAGTGAAGGAGGGGAGAGAGGAACTCCTGGTGGAGCGGTAAAA  
TGCGTAGATATCAGGAGGAACGCCGGTGGAGAAGTCGTCTCTCTGGCCTTTTACTGACGC  
TGAGATGCGAAAGCTAGGGGAGCAAACGGGATTAGAAACCCGAGTAGTCC

>Otu530

CCAGCCTATGGGGGGCACCAGACGAGAATATTCCGCAATGGACGAAAGTCTGACGGAGCG  
ACATCGCGTGCTGGATGAAGTGCTTAGGTACGTAAACAGCTTTTATCGGGGACGAAGTAA  
TTGACGGTACCCGATGAATAAGGGGCTCCTAACTCTGTGCCAGCAGGAGCGGTAATACAG  
AGGCCCCAAGCATTACCCGGAATCACTGGGCGTAAAGGGTGTCCAGGCGGCCCTATTAGT  
CTCTTGTAATAATCCGTGGGCTCAACCTACGGCGCGCAAGGGAAACGGTAGGGCTCGAGGG  
CGCGAGAGGTACAGGGAACCTATGGTGGAGGGGTGAAATCCGTTGATATCATGGGGAACA  
CCAAAGGCGAAGGCACTGTACTGGCGCGTTCCTGACGCTCACACACGAAAGCCAGGGTAG  
CGAACGGGATTAGATACCCCGTAGTCC

>Otu533

CCAGCCTATGGGAGGCACCAGTGGGGAATATTGCACAATGGGCGCAAGCCTGATGCAGCG  
ACGCCGCGTGCGGGATGAAGGCCTTCGGGTGTAAACCACTTTTACCAGGGACGAAGCGA  
GAGTGACGGTACCTGGGGAAGAAGCGCCGGCTAACTACGTGCCAGCAGCCGCGGTAATAC  
GTAGGGCGCAAGCGTTGTCCGGAATTATTGGGCGTAAAGAGCTCGTAGGCGGCTTGTCAC  
GTCTGCTGTGAAATCCCGGGGCTCAACCCCGGGCGTGCACTGGATACGGGCTTGCTAGAG  
GCAGGCAGGGGAGAACGGAATTCGCGGTGTAGCGGTGAAATGCGCAGATATCGGGAGGAA  
CACCGGTGGCGAAGGCGGTTCTCTGGGCCTGTTCTGACGCTGAGGAGCGAAAGCGTGGGG  
AGCAAACAGGATTAGAAACCCCGTAGTCC

>Otu534

CCAGCCTATGGGATGCAGCAGTGGGGAATATTGGACAATGGGGGAAACCCTGATCCAGCG  
ACGCCGCGTGGGTGAAGAAGGCCTGCGGGTGTAAAGCCCTTTCAGTGGAGAAGAAAAGC  
CTCGACCTAATACGTCGGGGTCTTGACGTAACTCACAAAAGAAGCACCGGCTAACTCTGT  
GCCAGCAGCCGCGGTAATACAGAGGGTGCAGAGCGTTAATCGGAATTACTGGGCGTAAAGC  
GCGCGTAGGCGGCTTTGCAAGTCGAGTGTGAAATCCCCGGGCTCAACCTGGGAACTGCAT  
TCGAGACTGCATTGCTAGAGTATGGGAGAGGGAGGTGGAATTTTCAGGTGTAGCGGTGAAA  
TGCGTAGATATCTGAAGGAACATCAGTGGCGAAAGCGACCTCCTGGACCAATACTGACGC  
TCATGTGCGAAAGCGTGGGGAGCAAACAGGATTAGAAACCCCTTGTAGTCC

>Otu535

CCAGCCTACGGGTGGCACCAGGCGCGAAACCTCTACAATGCACGCAAGTGTGATAGGGGA  
ATCCCAAGTGCTCAAGCACAGCTTGGGCTTTTGCTATGTGTAAATAGCATGGCGAATAAG  
TGGTGGGCAAGACTGGTGCCAGCCGCCGCGGTAACACCAGCGCCACGAGTGGCAATCGCG  
TTTATTGGGCCTAAAGCGTCCGTAGCAGGTTTTGTAAATTTCTTGTGAAACTGCCAGGCT  
CAACTTGGCAATGTGCAGGAAACACTGCAGAACTAGAGACCGGGAAGGGTCAGAGGTATT  
CCTGAGGGAGCGGTAAAATGCTATAATCTCAGGAGGACCACCGGTGGCGAAGGCGTCTGA  
CTAGAACGGATCTGACTGTGAGGGACGAAAGCTAGGGGAGCAAACCGGATTAGATACCTT  
CGTAGTCC

>Otu536

CCAGCCTACGGGGGGCACCAGTCGAGAATCTTCGGCAATGAGCGCAAGCTTGACCGAGCG  
ACGCCGCGTGCGGGATGAAGGCCTTCGGGTGTAAACCGCTTTCAGTGGGGAGGAAATCG  
CTAGGGGTTCTCCCCTAGTGTTGACCTATCTTCAGAAGAAGGACGGGCTAAGTTTCGTGCC  
AGCAGCCGCGGTAATACGAACCGTCCAAACGTTATTCGGATTTCATTGGGCTTAAAGGGTA  
CGTAGGCGGCGCCGTGAGTCGGGTGTGAAAAGCCCTCGGCTCAACCGAGGAACTGCGCCCCG  
ATACTGCGGTGCTTGAGGGAGACAGAGGTAAGCGGAACTGATGGTGGAGCGGTGAAATGC  
GTTGATATCATCAGGAACACCGGTGGCGAAAGCGGCTTACTGGGTCTCTTCTGACGCTGA  
GGTACGAAAGCTAGGGGAGCGAACGGGATTAGAAACCCCTAGTAGTCC

>Otu537

CCAGCCTATGGGTTCACCCAGTGGGGAATATTGCACAATGGGCGCAAGCCTGATGCAGCG  
ACGCCGCGTGCGGGATGACGGCCTTCGGGTGTAAACCTCTTTCACCATCGGCGAAGCCG  
GATGCTGTTGTGCTGGTGACGGTAGGTGGAGAAGAAGCACCGGCCAACTACGTGCCAGC  
AGCCGCGGTAATACGTAGGGTGCGAGCGTTGTCCGGAATTACTGGGCGTAAAGAGCTCGT  
AGGTGGTTTTGTCGCGTTGTCCGTGAAATTCCCTGGCTTAACTGGGGGCGTGCGGGCGATA  
CGGGCAGACTGGAGTACTGCAGGGGAGACTGGAATTCCCTGGTGTAGCGGTGGAATGCGCA  
GATATCAGGAGGAACACCGGTGGCGAAGGCGGTCTCTGGGCAGTAACTGACGCTGAGGA  
GCGAAAGCGTGGGGAGCGAACAGGATTAGAAACCCCGTAGTCC

>Otu539

CCAGCCTATGGGTGGCACCAGTAGGGAATATTGCACAATGGAGGAAACTCTGATGCAGCG  
ACGCCGCGTGAGTGATGAAGGACTTCGGTTCGTAAAGCTCTGTTGCAGGGGAATAAGACA  
GTGAATGTACTCTGCGAGAAAGGGTTCGGCTAACTTCGTGCCAGCAGCCGCGGTAAGACGA  
GGGACCCGAGCGTTGTTCCGAATCATTGGGCGTAAAGCGGTGTAGGTGGCTCTGTAAAGT  
CAGGCGTGAAAGCCCGGGGCTTAACCTCGGAAGTGCCTTGATACTGCGAAGCTTGAGTG  
CCGGAGAGGCTACTAGAATTCCTGGTGTAGTGGTGAAATACGTAGATATCAGGAGGAATA  
CCGGTGGCGAAGGCGGGTAGCTGGCCAGACACTGACACTCAGACCCGAAAGCGTGGGGAT  
CAAACAGGATTAGATACCCGGGTAGTCC

>Otu542

CCAGCCTATGGGAGGCTGCAGTGGGGAATTTTACACAATGGGCGAAAGCCTGATGTAGCG  
ACACCGCGTGAGCGAAGAAGCCCTTTGGGGTGTAAGCTCTGTCAACAGGGACGAAAAAA  
ATGACGGTACCTGTGGAGGAAGCATCGGCTAACTACGTGCCAGCAGCCGCGGTAAGACGT  
AGGATGCGAGCGTTGTCCGGATTTATTGGGCGTAAAGAGTTCGTAGGCGGTTTTGTAAAGT  
CTGATGATAAAGACTGGGGCTCAACCCTGGGAGTGCATTGGATACTGGCAGACTAGAGTG  
TGGTAGAGGCAAGCGGAATTTCCAGTGTAGCGGTGAAATGCGTAGATATTGGGAAGAACA  
CCGGTGGCGCAAGCGGCTTGCTGGGCCATAACTGACGCTGAGGAACGAAAGCTAGGGTAG  
CGAATGGGATTAGAAACCCGTGTAGTCC

>Otu546

CCAGCCTACGGGTGGCTGCAGTCGAGAATCATTCGCAATGGGCGAAAGCCTGACGATGCG  
ACGCCGTGTGAGCGATGAAGGCCTTAGGGTTGTAAAGCTCTTTCGCTTGGAACAAGAGA  
CGCTGGCTAATATCCAGCAGATTTGAGGGTACCAGGTAAAGAAGCACCGGCTAACTCCGT  
GCCAGCAGCTGCGGTAATACGGAGGGTGCAAGCATTAATCGGATTTATTGGGCGTAAAGG  
GCGCGTAGGCGGAAAGAAAAGTCAGATGTGAAATCCTGGGGCTCAACCTCAGAACAGCAT  
TTGAAACTCTCTTCTAGAGGGTAGGCGGAGAAAACGGAATTCACAAAGTAGCGGTGAAA  
TGCGTAGATATGTGGAAGAACACCGGTGGCGAAGGCGGTTTTCTAGCTTATTCCTGACGC  
TGAGGCGCGAAAGCAAGGGGATCAAACAGGATTAGATACCCCTGTAGTCC

>Otu549

CCAGCCTACGGGAGGCTCCAGTCGAGAATTTTTCACAATGGGGGAAACCCCTGATGAAGCG  
ACGCCGCGTGCGGGATGAATGGCTTCGGCCCGTAAACCCCTGTCATTTGTGAACAAACCT  
TTCCGCTGAACAAGCGGGAAGCTGATTGTAACGGAAGAGGAAGGGACGGCTAACTCTGTG

CCAGCAGCCGCGGTAATACAGAGGTCCCAAGCGTTGTTTCGGATTCACTGGGCGTAAAGGG  
TGCGTAGGTGGCCGGGTAAGTCTGATGTGAAATCTCGGAGCTTAACTCCGAAACGGCATT  
GGATACTATCCGGCTCGAGGGTCGGAAGGGGGACTGGAATTCTCGGTGTAGCAGTGAAAT  
GCGTAGATATCGAGAGGAACACCAGTGGCGAAGGCGAGTCCCTGGACGACTCCTGACACT  
GAGGCACGAAAGCTAGGGGAGCAAACAGGATTAGATAACCCCCGTAGTCC

>Otu550

CCAGCCTACGGGATGCAGCAGTAGGGAATTTTCCACAATGGGCGAAAGCCTGATGGAGCA  
ACACCGCGTGACAGGATGAAACCTTTAGGGGCGTAAACTGCTTTTATATGTGACGAATATG  
ACGGTAGCATATGAATAAGGATCGGCTAACTCCGTGCCAGCAGCCGCGGTCATACGGAGG  
ATCCAAGCGTTATCCGGAATTACTGGGCGTAAAGAGTTGCGTAGGTGGCAAAGTAAGCAG  
AGCATGAAAGCGTGAGGCTCAACCTCATATCCATGTTTTGAACTGCTTAGCTAGAGGATG  
AGAGAGGTTATTGGAATTCCTAGTGTAGGAGTGAAATCCGTAGATATTAGGAGGAACACC  
GATGGCGTAGGCAGATAACTGGCTCATTCCTGACACTAAGGCACGAAAGCGTGGGGAGCA  
AACGGGATTAGAAACCCGGGTAGTCC

>Otu551

CCAGCCTATGGGTGGCAGCAGTGGGGAATCTTGCGCAATGGACGAAAGTCTGACGCAGCC  
ACGCCGCGTGAGTGAAGAAGGCCTTCGGGTTGTAAAGCTCTGTTCGGAGGGGACGAAAATG  
CGTTCGGTGAATAGCCGATCGTACTGACGGTACCCTCAAAGGAAGCACCGGCTAACTTCG  
TGCCAGCAGCCGCGGTAATACGAGGGGTGCGAGCGTTGCTCGGAATTATTGGGCGTAAAG  
GGTAGGTAGGTGGTCTGATTTGTCCGGGGTGAAAGCCTTGAGCTTAACTCAAGAAGTGCC  
TCGGAACGGTCAGACTCGAGTCCTGGAGAGGGTCGTGGAATTCCCGGTGTAGCGGTGAA  
ATGCGTAGAGATCGGGAGGAACACCAGCGGCGAAGGCGGCGACCTGGACAGGTACTGACA  
CTCAACTACGAAAGCGTGGGGATCAAACAGGATTAGATAACCCGCGTAGTCC

>Otu553

CCAGCCTATGGGTGCGCTGCAGTGGGGAATATTGGACAATGGGCGCAAGCCTGATCCAGCC  
ATCCCGCGTGACAGGAAGAAGGCCCTATGGGTTGTAAACTGCTTTTGTGCAGGAAGAACAG  
TATCCTCGAGAGGGTATTTGACGGTACTGTGCGAATAAGCACCGGCTAACTCCGTGCCAG  
CAGCCGCGGTAATACGGAGGGTGCAAGCGTTATCCGGATTTATTGGGTTTAAAGGGTGCG  
TAGGCGGTAAACTAAGTCAGTGGTGAAATCCTGCAGCTTAACTGTAGCATTGCCATTGAA  
ACTGATTTACTTGAGTTATCTTGAAGTAGGCGGAATGTGTAGTGTAGCGGTGAAATGCTT  
AGATATTACACAGAACACCGATTGCGAAGGCAGCTTACTAAGGGTGAACTGACGCTGAGG  
CACGAAAGCGTGGGGATCGAACAGGATTAGATAACCTCGTAGTCC

>Otu556

CCAGCCTATGGGATGCTGCAGTGGGGAATTTTGGACAATGGGCGCAAGCCTGATCCAGCA  
ATGCCGCGTGAGTGAAGAAGGCCTTCGGGTTGTAAAGCTCTTTTGTCCGGGAAGAAACGG  
CACTTACTAAAAATGAGCGTTATTGACGGTACCGGAAGAATAAGCACCGGCTAACTACGT  
GCCAGCAGCCGCGGTAATACGTAGGGTGCGAGCGTTAATCGGAATTACTGGGCGTAAAGC  
GTGCGCAGGCGGTTATGTAAGTCAGATGTGAAATCCCCGGGCTCAACCTGGGCATGGCAT  
TTGAGACTGCAAGGCTAGAGTGTGTCAGAGGGGGGTGGAATTCACGTGTAGCAGTGAAA  
TGCGTAGAGATGTGGAGGAACACCGATTGGCGAAGGCAGCCCCCTGGGATAACACTGACGC  
TCATGCACGAAAGCGTGGGGAGCAAACAGGATTAGAAACCCCTCGTAGTCC

>Otu558

CCAGCCTACGGGGCGCTGCAGTGGGGAATATTGGACAATGGGCGCAAGCCTGATCCAGCC  
ATGCCGCGTGAGTGATGAAGGCCCTAGGGTTGTAAAGCTCTTTTGTGCGGGAAGATAATG  
ACTGTACCGGGAGAATAAGCTCCGGCTAACTTCGTGCCAGCAGCCGCGGTAATACGAAGG  
GGGCTAGCGTTGTTTCGGAATTACTGGGCGTAAAGCGTGCGCAGGCGGCTTCCCAAGTCAG  
TGGTGAAAGTCCGGAGCTCAACTCCGGAAGTCCATTGAACTGTGAAGCTCGAGGACGA  
GAGAGGTGAGTGGAATTCAGTGTAGAGGTGAAATTCGCAGATATTGGGAAGAACACCG  
GTGGCGAAGGCGGCTCACTGGCTCGTTTCTGACGCTCATGCACGACAGCGTGGGGATCAA  
ACAGGATTAGAAACCCCTTGTAGTCC

>Otu559

CCAGCCTACGGGGGGCAGCAGGTAGGAATCTTTTGCAATGTACGCAAGTATGACAAAGCA  
AGCCAAAGTGAATTTCTTTTGGAAAATCTTTTGCCAGCTGTAAAAAGGCTGGCGAATA  
AGGAGTGGGCAAGACCGGTGCCAGCCGCCGCGGTAATCCCGGCAGTCCAAGTCGCAGCCA  
ACATTATTGGGTCTAAAACATCCGTAGCTTGCCTCGTAAGTCTCTTGTGAAATTCTGTCT  
CTTAAGGGCAGATCGTGCAAGGGATACTGCGAGGCTAGAGACCGGTGGACGTAAGGAGTA  
CATTCGAGGTAGTGGTAAAATACGTTAATCTCGAGTGGACTAACACTAGCGAAGGCACCT  
TACGATGACGGTTCTGACAGTGAGGGATGAAGGCTAGGGGCGCAAAATGGATTAGAAACC

CTTGTAGTCC

>Otu561

CCAGCCTATGGGGTGCAGCAGTGGGGAATCTTGACAAATGGGGGAAACCCTGATGCAGCG  
ACGCCGCGTGGGTGATGAAGCTCTTCGGAGTGTAAGCCCTTTTCGGCAGGGAAGAGAAAA  
GACGGTACCTGCAAAAGAAGCCCCGGCTAACTACGTGCCAGCAGCCGCGTAATACGTAG  
GGGGCTAGCGTTGTTTCGGAATTACTGGGCGTAAAGAGAGCGTAGGTGGTGCGGTGTGTTT  
GGTGTGAAATCTCCCGGCTCAACCGGGAGGGGCCATCGAAAACCTGCCGTGCTTGAATATG  
GGAGAGGGTAGTGGAATTCCCGGTGTAGCGGTGAAATGCGTAGAGATCGGGAGGAACACC  
AGCGACGAAGGTGGCTACCTGGACCATTATTGACACTGAGGCTCGAAAGCTAGGGGAGCA  
AACAGGATTAGATAACCCCTGTAGTCC

>Otu562

CCGCCTACGGGTTCGAGCAGTCGAGGATCTTCGTCAATGGGCGCAAGCCTGAACGAGCGA  
CGCCGCGTGCGCGATGAAGGCCTTCGGGTGTAAAGCGCGAAAGTGAGAGAAAGGGAAA  
CTTGATCAATCCACAGTAAGGACGGGCTAAGTTTCGTGCCAGCAGCCGCGTAAGACGAAC  
TGTCTTAACGTTGTTTCGGAATCACTGGGCTTAAAGGGCGCGTAGGCGGTTCGGACAAGTCG  
GGGGTGAAATCCTGCAGCTTAACTGTAGAAGTGCCCTTCGATACTGTCCGTCTGGAGGGAG  
ATAGGGGTGTGCGGAACCTCCAGTGGAGCGGTGAAATGCGTAGATATCGGAAGGAACACC  
TGTGGCGAAAGCGGCTCACTGGACCATAACTGACGCTGATGCACGAAAGCTAGGGGAGCA  
AACAGGATTAGATAACCCCTAGTAGTCC

>Otu564

CCAGCCTACGGGTTCGAGCAGTAGGGAATCTTCCGCAATGGGCGAAAGCCTGACGGAGCA  
ATGCCGCGTGAGTGATGAAGGCCTTCGGGTGCTAAAGCTCTGTTGAGGGGGAAGAATGAT  
TCATCCGATAATACCGGATGAGTTTTGACGGTACTCCTCGAGGAAGCCCCGGCTAATTAC  
GTGCCAGCAGCCGCGTAATACGTAAGGGGCAAGCGTTGTCCGGAATCACTGGGCGTAAA  
GCGCACGTAGGCGGCTTGGCAAGTCAGGGGTGCAAGCTCTAGGCTTAACCTAGAAATTGC  
CTCTGAAACTACCTCGCTTGAGGGTTCAGAGGGGAAACTGGAATTCACGGTGTAGCGGTGA  
AATGCGTAGATATCGTGGAGAACACCCGTGGCGAAGGCGGGTTTTCTGGCTGACAACTGAC  
GCTGAGGTGCGAAAGCTAGGGGAGCGAACGGGATTAGATAACCCCGTAGTCC

>Otu565

CCAGCCTACGGGTTCGAGCAGTGGGGAATATTGGACAATGGGGGCAACCCTGATCCAGCG  
ACGCCGCGTGGGTGAAGAAGGCCTGCGGGTTGTAAAGCCCTTTTCGTTGGGGAAGAAAAGT  
TCCGACCTAATACGTCGGGACCGTGACGTTACCCAAAGAAGAAGCACCGGCTAACTCTGT  
GCCAGCAGCCGCGTAATACAGAGGGTTCGAGCGTTAATCGGAATTACTGGGCGTAAAGC  
GCACGTAGATGGCTTTGTAAAGTCAGATGTGAAATCCCCGGGCTCAACCTGGGAACTGCAT  
TTGAAACTGCATTGCTCGAATGTGGAAGAGGGAAGCGGAATTCAGGTGTAGCGGTGAAA  
TGCGTAGATATCTGGAGGAACATCAGTGGCGAAGGCGGCTTCCTGGTCCAACATTGACAT  
TCAGGTGCGAAAGCTGGGGAGCAAACAGGATTAGAAACCCTTGTAGTCC

>Otu566

CCAGCCTACGGGTGGCAGCAGTCGAGGATCATTCGCAATGGGCGAAAGCCTGACGATGCG  
ACGCTGCGTGAACGATGAAGGCCTTCGGGTGCTAAAGTTCTTTTCGCGCAAGAACAAGGAA  
GGTATGTGAATAACATACCGACTTGAGGGTACTGCGTAAAGAAGCACCGGCTAACTCCGT  
GCCAGCAGCTGCGGTAATACGGAGAGTGCAAGCATTAATCGGAATTATTGGGCGTAAAGG  
GCGCGTAGGCGGAATGATAAGTCAGATGTGAAATACCGAAGCTCAACTTCGGTGCTGCAT  
TTGAAACTATCAATCTAGAGGGTTGACGGAGAAAACCGGAATTCACGTGTAGCGGTGAAA  
TGCGTAGATATGTGGAAGAACACCAAGTGGCGAAGGCGGTTTTCTAGTTAATACCTGACGC  
TGAGGCGCGAGAGCAAGGGGAGCAAACAGGATTAGATAACCCGTGTAGTCC

>Otu568

CCAGCCTACGGGTGGCAGCAGCAAGGAATTTTTCGCAATGGGCGAAAGCCTGACGCAGCA  
ACGCCGCGTGAGGGATGAAGGCCTTCGGGTGTAAACCTCTTTTGTGAGGGACGAATAAT  
GACGGTACCTGGCGAATAAGCTTCGGCTAACTACGTGCCAGCAGCCGCGTAATACGTAG  
GAAGCAAGCGTTATCCGGATTCACTGGGCGTAAAGTGAGCGTAGGTGGCCTTTCAAGTCG  
GATGTGAAATCTCCTGGCTTAACTGGGAGGGGTCAATTCGATACTGTTGGGCTAGAGGACA  
TCAAGGGAAGGTGGAATTCCGGGTGTAGTGGTGAAATGCGTAGATATCCGGAGGAACACC  
AGTGGCGAAGGCGGCCTTCTGGGATGTTTCTGACACTGAGGCTCGAAAGTGTGGGGAGCG  
AACAGGATTAGAGACCCTCGTAGTCC

>Otu573

CCAGCCTACGGGATGCTCCAGTAAGGAATATTGGTCAATGGGCGGAAGCCTGAACCAGCC  
ATGCCGCGTGCGAGGAAGACGGCCCTACGGGTGTAAACTGCTTTTGTGCCAGATAAACC

TTCGTTTCGTGAACGAAGCTGAATGTATGGTAAGAATAAGGATCGGCTAACTCCGTGCCAG  
CAGCCGCGGTAATACGGAGGATCCGAGCGTTATCCGGATTTATTGGGTTTAAAGGGTGCG  
TAGGCGGCCTGTTAAGTCAGTGGTGAGAGACGGTAGCTCAACTATCGCAGTGCCCTTGAT  
ACTGATGGGCTTGAATGTACTAGAGGCAGGCGGAATGTGACAAGTAGCGGTGAAATGCAT  
AGATATGTCACAGAACACCAATTGCGAAGGCAGCTTACTATGGTATGATTGACGCTGAGG  
CACGAAAGCGTGGGGATCAAACAGGATTAGAGACCCGCGTAGTCC

>Otu576

CCAGCCTACGGGGTGCTGCAGTAGGGAATCTTGCGCAATGGGCGAAAGCCTGACGCAGCA  
ACGCCGCGTGGGGGATGAAGGCCTTCGGGTGTAAAGCGCGAAAGTGGGGACAAAACCGC  
AAGGTTGATCGATCCACAGTAAGGACGGGCTAAGTTTCGTGCCAGCAGCCGCGGTAAGACG  
AACTGTCCAAACGTTGTTTCGGAATCACTGGGCTTAAAGGGCGCGTAGGCGGTCCATCAAG  
TCGGGGGTGAAATCCTGCAGCTTAACTGTAGAAGTGCCTTCGATACTGATGGTCTGGAGG  
GAGGTAGGGGTGTGTGGAACCTCCAGTGGAGTGGTGAATGCGTTGATATTGGAAGGAAC  
GCCGGTGGCGAAAGCGACGCACTGGACCTCTTCTGACGCTGAGGCGCGAAAGCTAGGGGA  
GCAAACGGGATTAGAAACCCCGGTAGTCC

>Otu577

CCAGCCTACGGGGTGCGAGCAGTCGAGAATTTTTCTCAATGGGGGCAACCCTGAAGGAGCG  
ACGCCGCGTGGAGGATGAAGGTCTTCGGATTGTAAACTCCTGTCATTGGGGAACAAGTGC  
CGGTAATTAATACTACTACCGGCTTGATAGTACCTGAAGAGGAAGAGACGGCTAACTCTGTG  
CCAGCAGCCGCGGTAATACAGAGGTCTCAAGCGTTGTTTCGGATTTCATTGGGCGTAAAGGG  
TGCGTAGGTGGCGCCGTAAGTCAGGTGTGAAATCTCGGGGCTCAACCCCGAAACTGCACT  
TGATACTACGGTGTCTCGAGTACTGGAGAGGAGATTGGAATTTACGGTGTAGCAGTGAAAT  
GCGTAGATATCGTAAGGAAGACCAGTGGCGAAGGCGAATCTCTGGACAGTTGCTGACACT  
GAGGCACGAAGGCCAGGGGAGCAAACGGGATTAGATACCCCAGTAGTCC

>Otu579

CCAGCCTATGGGTTGCTGCAGTTAGGAATCTTGCGCAATGGGCGAAAGCCTGACGCAGCC  
ATGCCGCGTGAATGATGAAGGTCTTAGGATTGTAAAATTCTTTCAGTGGGGAAGATAATG  
ACGGTACCCACAGAAGAAGCTCCGGCTAACTTCGTGCCAGCAGCCGCGGTAATACGAAGG  
GGGCTAGCGTTGCTCGGAATTACTGGGCGTAAAGGGCGCGTAGGCGGATGACTAAGTTGG  
GGGTGAAAGCCCCGGGGCTCAACCTCGGAACCTGCCTTCAATACTGGTTCATCTTGAGTTCCG  
GAGAGGTGTGTGGAACCTCCGAGTGTAGAGGTGAAATTCGTAGATATTTCGGAAGAACACCA  
GTGGCGAAGGCGACACACTGGCCCGATACTGACGCTGAGGCGCGAAAGCGTGGGGAGCAA  
ACAGGATTAGAAACCCCTGTAGTCC

>Otu580

CCAGCCTATGGGGGCTGCAGTCGAGGATCTTCGGCAATGGGGGCAACCCTGACCGAGCGA  
TGCCGCGTGCGCGATGAAGGCCTTCGGGTGTAAAGCGCGAAAGTGGGGAGAAAAGCGAA  
AGTTTGATCTATCCACAGTAAGCTCGGGCTAAGTTTCGTGCCAGCAGCCGCGGTAAGACGA  
ACCGAGCGAACGTTGTTTCGGAATCACTGGGCTTAAAGGGCGCGTAGGCGGGCTGTCAAGT  
TTGGGGTGAAATCCCGCGGCTCAACCGTGGAACCTGCCTCAAATACTGACGGTCTCGAGGG  
AGGTAGGGGCGAGCGGAACCTAATGGTGGAGCGGTGAAATGCGTTGATATCATCAGGAAC  
CCGGTGGCGAAGGCGGCTCGCTGGACCTTTTCTGACGCTGAGGCGCGAAAGCTAGGGGAG  
CAAACGGGATTAGAAACCCCTGGTAGTCC

>Otu581

CCAGCCTACGGGGTGCTGCAGTGAGGAATTTTCCGCAATGGGCGAAAGCCTGACGGAGCG  
ACGCCGTGTGTGCGATGAAGTCCTTCGGGATGTAAAGCACTGTCAGTGGGGAAGATATTG  
ACGGTACCCACAGAGGAAGGCCCCGGCTAACTACGTGCCAGCAGCCGCGGTAATACGTAGG  
GGCCAAGCGTTGTCCGGAATTATTGGGCGTAAAGGGCGGTGTAGGCGGCCTGATAAGTCAG  
ATGTTAAATCTACAGGCTCAACCTGTATCCGCATTTGATACTGTCGGGCTAGAGAGTGGT  
AGAGGAAAGTGGAACCTACGGTGTAGCGGTGAAATGCGTAGATATCGTAAGGAACACCAG  
TGGCGAAGGCGACTTTCTGGGCCACTTCTGACGCTGAGACGCGAAAGCCAGGGGAGCAAA  
CGGGATTAGATACCCCAGTAGTCC

>Otu582

CCAGCCTACGGGGGGCTCCAGTGGGGAATATTGGACAATGGGCGCAAGCCTGATCCAGCC  
ACGCCGCGTGAGTGATGAAGGCCTTCGGGTGCTAAAGCTCTGTGGGGAGGGACGAACCGC  
TGGGTATTAATAACCATCCAGCATGACGGTACCTCCTTAGCAAGCACCGGCTAACTTCGTG  
CCAGCAGCCGCGGTAATACGAAGGGTGCAAACGTTGCTCGGAATTATTGGGCGTAAAGCG  
CACGTAGGCGGCTTATCAAGTCGGATGTGAAATCCCTCGGCTCAACCAAGGAAGTGCATC  
CGAAACTGACAAGCTTGAGTTCGAAAGAGGATCGCGGAATTCCCGGTGTAGAGGTGAAAT



TCGTAGATATCGGGAGGAACACCAGTGGCGAAGGCGGCGATCTGGGTCGATACTGACGCT  
GAGGTGCGAAAGCGTGGGGAGCAAACAGGATTAGAGACCCTCGTAGTCC

>Otu583

CCAGCCTACGGGGCGCTGCAGTCGAGAATCTTCCGCAATGGACGAAAGTCTGACGGAGCG  
ACGCCGCGTGCAGGATGAAGTGCTTCGGTATGTAAACTGCTTTTGCCAGGGAGAAAGTTT  
ATTGATAGTACTTGGCGAATAAGAGGTTGCTAAACTCGTGCCAGCAGCAGCGGTAATACG  
AGTGCCCTCAAGCGTTATCCGGAATTATTGGGCGTAAAGGATGTGTAGGTGGTTCGTGTTAG  
TCTCTTGTTAAATTCTTCGGCTTAACCGGGGGCATGCAAGGGAAACGGCACGACTCGAGG  
ATGCGAGGGGTCTGCGGAACATCATGTGTAGCGGTGAAATGCGTTGATATTATGGGGAAC  
ACCAAAGCGAAGGCAGCAGACTGGAGCACTCCTGACACTGAAACATGAAAGCGTGGGTA  
GCGAATGGGATTAGAAACCCTCGTAGTCC

>Otu585

CCAGCCTATGGGTCGCAGCAGTGAAGAATCTTGGGCAATGGAGGAAACTCTGACCCAGTG  
AGAATACGTGTATGACGAAGGCGTCCAGTTTTCTGTAAAGTACTTTTCGGGGATGAAGATG  
TAGGCATCAGTCCCAGTAAGAAGCACTGGCCAACCTCCGTGCCAGCAGCCGCGGTAATACG  
GAGAGTGCGGGCGTTATTTCGTTTTGATTGGGTGTAAAGGGTACGTAGGTTGCTGTTGCTA  
ATTCTTGTCCGAAATCGTGGAGTATTCTACACGGCGGCCCTTTTAAAGATTTCAGCTAGTG  
TCAAGGATAGGTAGGGGCAATTTCTGTGTAGGGGTAGAATCCAGCCATATAGGAACGAA  
CGCCAGCTGGCGAAGGCGCCTTTCTAGTTTTGACAGACGCTAAGGTACGGAAGCGTGGGG  
AGCAAACAGGATTAGAAACCCGAGTAGTCC

>Otu588

CCAGCCTACGGGATGCTCCAGTCAAGAACTTTCCACAATGGGCGAAAGCCTGATGGAGCG  
ACGCCGCGTGACTGATGAAGTCCTTCGGGACGTAAAGGTCTTTTATGGGGGAGGAAGTAA  
TTGACGTTACCCCATGAATAGGGGGCTCCTAACTCTGTGCCAGCAGGAGCGGTAATACAG  
AGGCCCAAGCGTTATCCGGAATCACTGGGCGTAAAGGATGTGTAGGCGGTTCGTGTTAGT  
CGTCTGTGAAAGGCCGTGGGCTTAACCCATGGACCGCAAACGAAACGGCACGACTTCGAG  
GATGCGAGAGGTATATGGAATCATGGTGTAGGGGTGAAATCCGTTGATATCATGGGGAA  
CACCAAATGCGAAGGCAATATACTGGCGCACTCCTGACGCTGAGACATGAAAGCGTGGGA  
ATCGAACGGGATTAGAGACCCTAGTAGTCC

>Otu589

CCAGCCTATGGGGGGCTGCAGTGGGGAATATTGGACAATGGGCGAAAGCCTGATCCAGCA  
ACTCTGCGTGAGGGACGAAGGTCTTCGGATCGTAAACCTCTTTTACATGGGACGAAATCC  
CGCAAGGGTCTGACGGTACCATGCGAATAAGCAACGGCTAACTATGTGCCAGCAGCCGCG  
GTAAGACATAGGTTGCGAGCGTTATTTCGGAATTACTAGGCGTAAAGCGAGTGTAGGCGGA  
CCTTTAAGTCTGACGTTAAATCTCCTGGCTTAAGTAGGAGCTGTCGTCGGATACTGAAGG  
CCTCGAATGGGGTAGGGGGCAGCGGAATTCGCGGTGTAGCGGTGAAATGCGTAGATATCG  
GGAGGAACACCTATGGCGAAAGCAGCTGCCTGGGCCTCTATTGACGCTAAGACTCGAAAG  
CTGGGGGAGCAAACAGGATTAGATACCCTCGTAGTCC

>Otu590

CCAGCCTATGGGTTGCTGCAGTAAGGAATCTTCCACAATGGGCGAAAGCCTGATGGAGCA  
ATGCCGCGTGACGATGACGGCCTTCGGGTGTAAACTGCTTTTATATGGGAAGATTATG  
ACGGTACCATATGAATAAGGACCGGCTAACTACGTGCCAGCAGCCGCGGTAATACGTAGG  
GTCCAAGCGTTATCCGGAATCACTGGGCGTAAAGCGTGCGTAGGCGGACGTTTAAAGTGCA  
ATGCGAAATCTCGTGGCTCAACCATGTAGACTGTATTGCATACTGGATGTCTAGAGGATG  
GCAGAGGCAAGTGGAATTACTGGTGTAGCAGTGAAATGCGTAGATATCAGTAGGAACACC  
AATGGCGAAGGCAGCTTGCTGGGCCATTTCTGACGCTAAGGCACGAAAGCGTGGGGGGCG  
AACAGGATTAGAGACCCGCGTAGTCC

>Otu591

CCAGCCTATGGGGCGCACCCAGTAGGGAATATTGGACAATGGGGGCAACCCTGATCCAGCC  
ATGCCGCGTGAAATGATGAAGGCCTTCGGGTGTAAAGTTCTTTTGGCGGGGACGATGATG  
ACGGTACCCGCGAGAATAAGCTCCGGCTAACTTCGTGCCAGCAGCCGCGGTAATACGAAGG  
GAGCTAGCGTTGTTTCGGAATTACTGGGCGTAAAGGGCGCGTAGGCGGCTTGGCAAGTTGG  
GTGTGAAAGCCCTGGGCTCAACCCGGGAACCTGCACTCAAGACTGCCTTGCTTGAATTCGG  
TAGAGGGTGGTAGAATTCACAGTGTAGAGGTGAAATTCGTAGAGATTGGGAAGAATACCC  
GTGGCGAAGGCGGCCAACTGGACCGACATTGACGCTGAGGCGCGAAAGCGTGGGGGAGCAA  
ACAGGATTAGAAACCCCGTAGTCC

>Otu593

CCCTACGGGTGGCTGCAGTCGAGGATCTTCGGCAATGTGCGCAAGCACGACCGAGCGACG

CCGCGTGTGCGACGAAGGCCTTCGGGTTGTAAAGCACTGTCGAGGGGGAGAAAAGCCTGC  
AAGGGTGTGATCTATCCCTGGAGGAAGCTCGGGCTAAGTTCGTGCCAGCAGCCGCGGTAA  
GACGAACCGAGCGAACGTTGTTTCGGAATCACTGGGCTTAAAGGGCGCGTAGGCGGGCTGC  
CAAGTTTGTGGTGAATCCTCCGGCTCAACCGGGGAAGTGCCTCGAATACTGGCGGTCTG  
GAGGGAGGTAGGGGCGTGCGGAAGTGTAGGTGGAGCGGTGAAATGCGTTGATATCTACAG  
GAACTCCGGTGGCGAAGGCGGCACGCTGGACCTTTTCTGACGCTGAGGCGCGAAAGCCAG  
GGGAGCGAACGGGATTAGAAACCCTCGTAGTCC

>Otu595

CAGCCTACGGGGGGCTGCAGTCGAGGATCTTTGGCAATGAGCGCAAGCTTGACCAAGCGA  
CGCCGCGTGTGCGATGAAGGCCTTCGGGTTGTAAACCACTGTCAGAGGGGATGAAATGCA  
GGTGGGTTCTCCCATCTGTTTGACATAGCCTCAGAGGAAGGACGGGCTAAGTTCGTGCCA  
GCAGCCGCGGTAAAGACGAACCGTCCAAACGTTATTTCGAAATCACTGGGCTTAAAGGGTGC  
GTAGGCGGCGCGGCAAGTTGGGTGTGAAATCCCTCGGCTCAACCGAGGAACTGCGCCCAA  
AACTGCCGTGCTCGAGGGAGATAGAGGTGAGCGGAACTTAGGGTGGAGCGGTGAAATGCG  
TTGATATCCTAAGGAACACCGGTGGCGAAAAGCGGCTCACTGGATCTCTTCTGACGCTGAG  
GCACGAAAGCTAGGGTAGCGAACGGGATTAGATACCCCCGTAGTCC

>Otu600

CCAGCCTATGGGTGGCACCAGTCGAGAATTTTTCTCAATGGGCGAAAGCCTGAAGGAGCG  
ACGCCGCGTGGGGGATGAAGGGCTTCGGCTCGTAAACCCCTGTCATTTGCGAACAAACCT  
TACGATTGAACAGATCGTGAGCTGATTGTAGCGAAAGAGGAAGGGACGGCTAACCCCTGTG  
CCAGCAGCCGCGGTAATACAGAGGTCCCAAGCGTTGTTTCGATTCACTGGGCGTAAAGGG  
TGCGTAGGCGGTTGAATAAGTCTGATGTGAAATCTCCGGGCTTAACCCGGAATTGCATC  
GGATACTATCCGACTAGAGGAATGGAGGGGAGACTGGAATACTTGGTGTAGCAGTGAAAT  
GCGTAGATATCAAGTGGAACACCAAGTGGCGAAGGCGAGTCTCTGGACATTTCTGACGCT  
GAGGCACGAAAGCCAGGGGAGCAAACGGGATTAGATACCCCTGTAGTCC

>Otu601

CCAGCCTATGGGTGCTGCAGCAACGAATCTTCCCCAATGCCGGAACGGTGAGGGAGCG  
ACGCCGCGTGAAGGACGAAGTTCTTCGGAATGTAAACTTCTGCAAGGGTCATGAAAGCCT  
TAGGGCCAATATCCCAAAAGGTTGATCTGACCCCTAAAAGGGGCGGCTAACTCTGTGCCA  
GCAGCCGCGGTAATACAGAGGCCCAAGCGTTACTGAGAATCACTGGGTTTAAAGGGTGC  
GTAGGTGGTCCGTTAAGTTCGTTGTGAAAGCCCTGGGCTCAACCCAGGAACTGCTTCGAA  
TACTGGCGGACTTGAGGCCGCTAGGGGTCACTGGAAGTACGCGTGGAGCGGTGAAATGCG  
TAGATATCGTCAGGAACGCCAATGGTGAAGACAGGTGACTGGGCCGGATCTGACACTGAG  
GCACGAAAGCGTGGGGAGCGAACGGGATTAGATACCCCTGTAGTCC

>Otu604

CCAGCCTATGGGGGGCACCAGTGGGGAATTTTGGACAATGGGCGCAAGCCTGATCCAGCA  
ATGCCGCGTGGATGAAGAAGGTTTTTCGGATTGTAAAGTCTTTTCGGCGGGGACGATGATG  
ACGGTACCCGCGAGAAGAAGCCCCGGCTAACTTCGTGCCAGCAGCCGCGGTAATACGAAGG  
GGGCTAGCGTTGCTCGGAATGACTGGGCGTAAAGGGCGCGTAGGCGGTTTGGACAGTTAG  
GCGTGAAATTCTGGGCTCAACCTGGGGACTGCGCTTAATACATCCAGACTTGAGTGCGG  
AAGAGGGTTGTGGAATTCCCAAGTGTAGAGGTGAAATTCTGATGATATTGGGAAGAACACCG  
GTGGCGAAGGCGGCAACCTGGTCCGTGACTGACGCTGAGGCGCGAAAGCGTGGGGAGCAA  
ACAGGATTAGAGACCCCAGTAGTCC

>Otu607

CCAGCCTACGGGATGCTGCAGTGGGGAATCTTGCGCAATGGACGAAAGTCTGACGCAGCG  
ACGCCGCGTGGGTGATGAAGGCCTTCGGGTTGTAAAGCCCTGTGGGGAGAGACGAATAAG  
TCGGATCCAATAACTCCGATGATGACGGTATCTCCTTAGCAAGCACCGGCTAACTCTGTG  
CCAGCAGCCGCGGTAAGACAGAGGGTGCAAACGTTGTTTCGGAATTACTGGGCGTAAAGCG  
TGTGTAGGCGGCTACGCAAGTCCGATGTGAAATCCCCGGGCTCAACCCGGGAAGTGCACC  
CGATACTGCGCGGCTTGAGTACCAGAGAGGTGGTGGAATTCTCGGTGTAGAGGTGAAAT  
TCGTAGATATCGAGAGGAACACCGGTGGCGAAGGCGGCCAACTGGACGAGTACTGACGCT  
GAGACACGAAAGCGTGGGGAGCAAACAGGATTAGAAACCCGGGTAGTCC

>Otu613

CCAGCCTACGGGTCGCAGCAGTGGGGAATCTTGCGCAATGGGCGAAAGCCTGACGCAGCG  
ACGCCGCGTGAAGGAAGAAGGCCTTCGGGTTGTAAACCTCTTTCAGGAGGGACGAAGCCA  
CTCGGGTTAATAGCCCAGAGGGTGACGGTACCCCAAGAAAGCCCCGGCTAACTACGTG  
CCAGCAGCCGCGGTAATACGTAGGGGGCAAGCGTTGTCCGGATTTATTGGGCGTAAAGAG  
CGTGTAGGCGGTTACACAGGTCCGCTGTGAAAACCTCGAGGCTCAACCTCGAGCTGTCCGT

GGAAACCGTGTGGCTAGAGTCCGGAAGAGGAGAGTGGAATTCCTGGTGTAGCGGTGAAAT  
GCGCAGATATCGGGAAGAACACCCGTGGCTAAGGCGGCTCTCTAGTACGGTACTGACGCT  
GAGACGCGAAAGCGTGGGGAGCGAACAGGATTAGAAACCCCAGTAGTCC

>Otu616

CCAGCCTATGGGTGGCAGCAGTCGAGAATCTTCGGCAATGGACGAAAGTCTGACCGAGCG  
ACGCCGCGTGCAGGATGAAGGCCTTCGGGTGTAAACCGCTGTCAGAGGGGATGAAATTC  
ATTTGGGTGCTCCAGATGATTGACAGAGCCTCAGAGGAAGCACGGGCTAAGTACGTGCC  
AGCAGCCGCGGTAATACGTACTGTGCGAACGTTATTCGGAATCACTGGGCTTAAAGGGTG  
TGTAGGCGGTTGATTAAGTAGGGTGTGAAAGGCCTTGGCCTAACCAAGGCATTGCGCTCT  
AAACTGGTCGACTTGAGTAAGATAGGGGTGTGCGGAACCTCCAGTGGAGCGGTGAAATGT  
GTTGATATTGGAAGGAACGCCGGTGGCGAAAGCGGCACACTGGGTCTTAAGTACGCTGA  
GACACGAAAGCCAGGGGAGCGAACGGGATTAGAACCCCCGTAGTCC

>Otu621

CCAGCCTATGGGGTGCAGCAGTCGAGAATCTTTCACAATGGGGGCAACCCTGATGGAGCG  
ACGCCGCGTGGAGGATGAAGGGCTTCGTCTTGTAAGTCCCTGTCACCACAGAACAAGGTC  
TGTGTATTAATAACATGCAGATTTGATGGTATGTGGAGAGGAAGGGACGGCTAACTCTGT  
GCCAGCAGCCGCGTAATACAGAGGTCCCAAGCGTTGTTTCGGATTCACTGGGCGTAAAGG  
GTGCGTAGGAGGCCGGGAAAGTCTGATGTGAAATCCACCGCTTAACGGTGGAAATGGCAT  
TGGATACTGCTCGGCTCGAGGACTGGAGGGGAAAGCGGAATTCCTGGTGTAGCGGTGAAA  
TGCGTAGATATCAGGAGGAACACCAACGGCGAAGGCAGCTTTCTAGACAGTTCCTGACTC  
TGAGGCACGAAGGCCAGGGGAGCAAACGGGATTAGAGACCCCTAGTAGTCC

>Otu622

CCAGCCTATGGGTGCTGCTGCAGTTAAGAATCTTGCTCAATGGGCGAAAGCCTGAAGCAGCG  
ACGCCGCGTGGACGATGAAGGTCTTCGGATTGTAAAGTCCACTAAGCAGGGATGAATAAG  
CAACGGGTAATATTCGTTGTGATGACTGTACCTGCCTAAAGCCTCGGCTAACTACGTGCC  
AGCAGCCGCGGTAAGACGTATGAGGCAAGCGTTGTTTCGGAATTATTGGGCGTAAAGGGCG  
TGTAGGCGGGGGATTAAGTTAGGTGTGAAATCCATGGGCTTAACCCATGAACTGCATTTA  
ATACTGGTTCTCTTGAGTTCGGGAGAGGTGAGCGGAATTCCTGGTGTAGCGGTGAAATGC  
GTAGATATCGGGAAGAACACCAGTGGCGAAGGCGGCTCACTGGCCTAGAACTGACGCTAA  
GGCGCGAAAGCGTGGGGAGCGAACGGGATTAGAAACCCCTTGATAGTCC

>Otu623

CCAGCCTACGGGATGCAGCAGTAGGGAATATTGCACAATGGGCGAAAGCCTGATGCAGCG  
ATGCCACGTGAGCGATGAAGGCCTTCGGGTGTAAGCTCTTTTGTCTAGGAAAAAGAGG  
CGTGATTGAAAGGTTGCGTTTTTTTGATGGTACTAGAAGAAAAAGCACCTGCTAACTACGT  
GCCAGCAGCAGCGTAATACGTAGGGTGCAAGCGTTAATCGGAATTATTGGGCGTAAAGG  
GCGCGTAGGCGGATTTTTTAAGTCAGTGGTTAATCTCGGAGCTCAACTCCGAAAGTGCCA  
TTGATACTGAAAGTCTAGAGTATCGGCGGAGAAAATGGAATTCCTGGTGTAGCGGTGAAA  
TGCGTAGATATCAGGAGGAACACCAAGAGCGAAGGCAGTTTTCTAGCCGATAACTGACGC  
TGAGGCGCGAAAGCATGGGGAGCAAACAGGATTAGATAACCCGCGTAGTCC

>Otu626

CCAGCCTACGGGTTGCACCAGTGGGGAATCTTGCGCAATGGACGAAAGTCTGACGCAGCC  
ACGCCGCGTGAGTGAAGAAGGCCTTCGGGTGTAAAGCTCTGTGCGGAGGGGACGAAAAGC  
CAATAGGTGAATAGCCTGTTGGTGTGACGGTACCTTCAAAGGAAGCACCGGCTAACTCTG  
TGCCAGCAGCCGCGTAATACAGAGGGTGCAAGCGTTGCTCGGAATTATTGGGCGTAAAG  
GGCAGGTAGGTGGTCTCATTTGTCTGGGGTGAAAGCCTTGAGCTTAAGTCAAGAAGTGCC  
CCAGAAACGGTGAGACTGGAGTCTCGGAGAGGGTCGTGGAATTCCTGGTGTAGCGGTGAA  
ATGCGTAGAGATCGGGAGGAACACCAGAGGCGAAGGCGGCGACCTGGACGAGCACTGACA  
CTCAACTGCGAAAGCGTGGGGAGCAAACAGGATTAGATAACCCCTGTAGTCC

>Otu627

CCAGCCTATGGGTGGCAGCAGTGGGGAATCTTGCGCAATGGGCGAAAGCCTGACGCAGCG  
ACGCCGCGTGAGTGATGAAGGCCTTCGGGTGTAAAGCTCTGTGGAGGGGGACGAATAAG  
TCGTGGCCAACATCCACGATGATGACGGTACCTCTTTAGCAAGCACCGGCTAACTCTGTG  
CCAGCAGCCGCGGTAAGACAGAGGGTGCAAACGTTGTTTCGGAATTACTGGGCGTAAAGCG  
CGTGTAGGCTGCTCTGCAAGTCGGATGTGAAAGCCCTGGGCTCAACCTAGGAAGTGCATT  
CGAAACTGCAAAGCTTGAGTCTGGAGAGGAAGGCGGAATTCCTCGGTGTAGAGGTGAAAT  
TCGTAGATATCGAGAGGAACACCGGTGGCGAAGGCGGCTTCTGGACAGTGAAGTACGCT  
GAGACGCGAAAGCGTGGGGAGCAAACAGGATTAGATAACCCGTGTAGTCC

>Otu628

CCAGCCTATGGGGGGCTCCAGTGAGGAATTTTGCGCAATGGCCGCAAGGCTGACGCAGCA  
ACGCCGCGTGGGTGAAGAAGGCCTTCGGGTCGTAAAGCCCTGTCAGGTGGGAAGAATGGC  
CCGGGGATTAAACAGTCTCCGGGAGTGACGGTACCACCAGAGGAAGCACCGGCTAACTCCG  
TGCCAGCAGCCGCGGTAATACGGAGGGTGCAAGCGTTATTCGGAATTACTGGGCGTAAAG  
CGCGTGCAAGCGGGCTAGCAAGTCTGATGTGAAAGCCCTGGGCTTAACCTGGGAAGTGCA  
TTGGAAGTCTGCTGGTCTTGAGTGCTGGAGAGGAAGGGGAATTCCCGGTGTAGAGGTGAA  
ATGCGTAGATATCGGGAAGAACAAGTGTGGCGAAGGCGGTCACCTGGGCTGTAAGTACA  
CTGAGACCCGAAGGCGTGGGGAGCAAACAGGATTAGATAACCGGGTAGTCC

>Otu629

CCAGCCTACGGGTGGCAGCAGTTTGGAAATATTCACAATGGGCGCAAGCCTGATGGAGCG  
ACACCGCGTGAAGGATGAAGGTCTTCGGATCGTAAACTTCTTTAGACCTAGATGAAGATT  
GCAAGGTAAATAATCTTGCAATTTGACAGTATAGGTAGAATAAGCCACGGCTAACTCTGT  
GCCAGCAGCCGCGGTAATACAGAGGTGGCAAACGTTGTCCGGATTTATTGGGTGTAAAGG  
GCATGTAGGTGGTCTTATAAGTCAAAGGTGAAATGGCCCGGCTCAACCAGGTCATTGCCCT  
TTGAAACTGCAAGACTTGAGTTTCGGAAGAGGAAAGCGGAATTCACAGTGTAGCGGTGAAA  
TGCGTAGATATTGGGAGGAACACCGGTGGCGAAGGCGGCTTTCTGGTCCGAAACTGACAC  
TGAGATGCGAAAGCCAGGGGAGCAAACGGGATTAGAGACCCTCGTAGTCC

>Otu630

CCAGCCTATGGGTTGCTCCAGTGGGGAATTTTGCGCAATGGGCGAAAGCCTGACGCAGCA  
ACGCCGCGTGAGTGATGAAGGCTTTTCGGGTCGTAAAGCTCTGTGAGGGGAAAGAAGTGT  
AAGGAGGTTAATACCTCTTTATTTGACGGTACCCCTAAAGGAAGCACCGGCTAACTCCG  
TGCCAGCAGCCGCGGTAATACGGGGGGTGCAAGCGTTGTTCCGATTTATTGGGCGTAAAG  
AGCGTGTAGGCGGTTTGTAAAGTCTGATGTGAAAGCCCTGGGCTCAACCCAGGAAGTGCA  
TTGGAAGTGTGACACTTGAATACGGGAGAGGGCAGTGGAATTCCTAGTGTAGAGGTGAA  
ATTCGTAGATATTAGGAAGAACACAGTGGCGAAGGCGGCCAACTGGCCCCGATACTGACG  
CTCATGTGCGAAAGCGTGGGGAGCAAACAGGATTAGAAACCCAGTAGTCC

>Otu632

CCAGCCTATGGGAGGCACCAGTGGGGAATTTTGGACAATGGGGGCAACCCTGATCCAGCA  
ATGCCGCGTGAGTGAAGAAGGCCTTCGGGTTGTAAAGCTCTTTTGTGAGGGAAGAAAAGG  
GACTGGCTAATATCTGGTCCCTCATGACGGTACCTGAAGAATAAGCACCGGCTAACTACGT  
GCCAGCAGCCGCGGTAATACGTAGGGTGCAAGCGTTAATCGGAATTACTGGGCGTAAGGC  
GTGCGCAGGCGGTTTTGTAAAGTGTGCTGAAATCCCCGGGCTCAACCTGGGAATGGCGA  
TGGTGACTGCAAGGCTAGAGTTTGGCAGAGGGGGGTAGAATTCACAGTGTAGCAGTGAAA  
TGCGTAGATATGTGGAGGAACACCGATGGCGAAGGCGAGCCCCCTGGGTCAAAACTGACGC  
TCATGCACGAAAGCGTGGGGAGCAAACAGGATTAGAAACCCAGTAGTCC

>Otu633

CCAGCCTATGGGTTGCAGCAGTGGAGAATATTGGTCAATAAACGAAAGTTTGAAGTACGC  
TTTTGCGGAGATGAAAGATTTCATAGGATCGAGAAGGCTACGATAGCTGTAAAGTCTGTGC  
GTGGGTTAGAAAAATGATTCTACGCCTAAAGAGAACCCCGGGCCAACAACGTGCCAGCAG  
CTGCGGTAAGACGTTGACGGGGAAGCGTTACTGGCCGTTACTAGGTGTAAAGAGTGGCTA  
GACTGTTTTAAGAAATTGTATCTAAAATCATAGGATTGACGGAGGCATATACAATACCTTA  
ATACTGGAGATTTGGGGAGGTGGGCGATAAGTATAATCTAGAGATAAAAATTCAGAGAT  
TATAAGGATATCCTGTAGCCGCGGCGGCTTTCCATCCATTATCTGACGTCGAATCACTAA  
AGTACGAGCATCAATCAGGATTAGATAACCGGGTAGTCC

>Otu634

CCTACGGGGGGCTGCAGTGGGGATTTTGGGCAATGGGCAAAAGCCTGACCCAGCGACGCC  
GTGTGGGCGATGAAGGCCTTCGGGTTGTAAAGCCCTGTTGGGTGGAAAGAAGGGTTTCGA  
GACGAATAATCTCTGAACCTTGACGGTACCACCAGAGAAAGCACCGGCTAACTCCGTGCC  
AGCAGCCGCGGTAATACGGAGGGTGCAAGCGTTGTTTCGGAATTACTGGGCGTAAAGGGCG  
CGTAGGTGGTTGCGTAAGTCGGATGTGAAATCCCCGGGCTTAACCCGGGAAGTGCACCCG  
ATACTGCGTGACTCGAGTGACAGAGGGGAAACGGAATTCCTGGTGTAGAGGTGAAATTC  
GTAGATATCAGGAGGAACACCGGTGGCGAAGGCGGTTTCCTGGGCTGACACTGACACTGA  
GGCGCGAAAGCGTGGGTAGCAAACAGGATTAGAAACCCCTAGTAGTCC

>Otu636

CCAGCCTACGGGTTGCAGCAGTAAGGAATATTGGTCAATGGACGCAAGTCTGAACCAGCC  
ATGCCGCGTGAAGGATGAAGGCCCTAGTGGTCGTAAACTTCTTTTATACGGGAAAAATAG  
CATCTACGTGATAGGTGTTTGATGGTACTGTATGAATAAGCATCGGCTAACTCCGTGCCA  
GCAGCCGCGGTAATACGGAGGATGCAAGCGTTATCCGGATTTATTGGGTTTAAAGGGTGC

GCAGGCGGGGCTATAAGTCAGTGGTGAAAGCCTACAGCTTAACTGTAGAATTGCCATTGA  
TACTGTAGTCCCTTGAGTGTAGGTGAAGAAGGCGGAATGTGTTGTGTAGCGGTGAAATGCT  
TAGATATAACACAGAACACCGATTGCGAAGGCAGCTTTCTAAACTACAACCTGACGCTCAT  
GCACGAAAGCGTGGGGAGCAAACAGGATTAGATAACCCGAGTAGTCC

>Otu638

CCAGCCTACGGGGCGCTGCAGTCGAGAATTTTTCTCAATGGGGGAAACCCTGAAGGAGCG  
ACGCCGCGTGAGGATGAAGGTCTTCGGATTGTAACTCCTGTCATTAGAGAACAAAACC  
CACTTAGTAACTGATGTTGGGTTTGATAGTATCTGAAGAGGAAGAGACGGCTAACTCTGT  
GCCAGCAGCCGCGTAATACAGAGGTCTCAAGCGTTGTTTCGGATTTCATTGGGCGTAAAGG  
GTGCGCAGGCGGCGGGGCAAGTCGGATGTGAAATCTCGGGGCTTAACCCCGAAACTGCAT  
TCGATACTGCCTTGCTTGAGGACTGGAGAGGAGACTGGAATTCCTGGTGTAGCAGTGAAA  
TGCGTAGATATCAGGAGGAACGCCAATGGCGAAGGCAAGTCTCTGGACAGTTCCTGACGC  
TCATGCACGAAAGGCCAGGGGAGCAAACGGGATTAGAAACCCTGGTAGTCC

>Otu639

CCAGCCTATGGGGGTGCAGCAGTCGAGAATTTTTTCAATGGGCGAAAGCCTGATGGAGC  
GACGCCGCGTGGGGGATGAATGGCTTCGGCCCGTAAACCCCTGTCATTTCGCGAACAAACC  
TTTCCATTTAATACGTGGAAAGCTGATAGTAGCGGAAGAGGAAGGGACGGCTAACTCTGT  
GCCAGCAGCCGCGTAATACAGAGGTCCCAAGCGTTGTTTCGGATTCACTGGGCGTAAAGG  
GTGCGTAGGCGGCCAGGTAAGTCTGATGTGAAATCTCGGAGCCTAACTCCGAAACTGCAT  
TGGATACTATCTGGCTTGAGGAATGGAGGGGAGACTGGAATGCTCGGTGTAGCAGTGAAA  
TGCGTAGATATCAGAGCGGAACACCAAGTGGCGAAGGCGAGTCTCTGGACATTTCTGACGC  
TGAGGCACGAAAGCCAGGGGAGCAAACGGGATTAGAAACCCAGTAGTCC

>Otu640

CCAGCCTATGGGTGGCTGCAGTGAGGAATATTGGTCAATGGGCGCAAGCCTGAACCAGCC  
ATCCCGCGTGCGAGGAAGAAGGCGCTATGCGTCGTAAACTGCTTTTCCAGAGGAAGAAAAC  
CCCCGACGTGTCGGGGCTTGCCGGTACTCTGGGAATAAGCATCGGCTAACTCCGTGCCAG  
CAGCCGCGGTAATACGGAGGATGCGAGCGTTATCCGGATTTATTGGGTTTAAAGGGTGCG  
TAGGCGGACTTATAAGTCAGTGGTGAAATCTCGTTGCTTAACAACGAACGTGCCATTGAT  
ACTGTAGGTCTTGAGTACAGATGCCGTTGGCGGAATGTGTCATGTAGCGGTGAAATGCAT  
AGATATGACACAGAACACCGATTGCGAAGGCAGCTGACGAAACTGTAACCTGACGCTGAGG  
CACGAAAGCGTGGGGATCAAACAGGATTAGATAACCCGCGTAGTCC

>Otu644

CCAGCCTACGGGTGCGCAGCAGCCGAGAATATTCGACAATGGGCGAAAGCCTGATCGAGCG  
ATACCGCGTGGTGATGAAGTGCTTCGGCACGTAAACACCTTTTATGGAGGAGGAAGTAA  
TTGACGTTACTCCATGAATAAGGGGCTCCTAACTCTGTGCCAGCAGGAGCGGTAATACAG  
AGGCCCCGAGCATTACCCGGAATCATTGGGCGTAAAGAGTGCGTAGGTGGTCATGTTAGT  
CGGGCGTTAAACCCCGGGGCTCAACCCCGGAACCGCGCCCGAAACGGCATGACTCGAGGG  
CGTGAGAGGTACATGGAACCTCATGGTGTAGGGGTGAAATCCGTTGATATCATGGGGAAACA  
CCGAAAGCGAAGGCAATGTACTGGCGCGTTCCTGACACTCAAGCACGAAAGCCAGGGGAG  
CAAACGGGATTAGAAACCCGCGTAGTCC

>Otu649

CCAGCCTACGGGTGGCTCCAGTCGAGGATCTTCGGCAATGGGCGCAAGCCCGACCGAGCG  
ATACCGCGTGTGCGACGAAGGCCTTCGGGTTGTAAAGCACTGTGAGGGGGAGAAAACCG  
CAAGGTTGATCTATCCCTGGAGGAAGCACGGGCTAAGTTCGTGCCAGCAGCCGCGGTAAG  
ACGAACCGTGCGAACGTTGTTTCGGAATCACTGGGCTTAAAGGGCGCGTAGGCGGGCTGCC  
AAGTTTGGGGTGAAATCCTCCGGCTCAACCGGGGAAGTGCTCGAATACTGGCGGCCTCG  
AGGGGGGTAGGGGCGTGCGGAACCTGTGGGTGGAGCGGTGAAATGCGTTGATATCCACAGG  
AACTCCGGTGGCGAAGGCGGCACGCTGGACCTTTTCTGACGCTGAGGCGCGAAAGCCAGG  
GGAGCGAACGGGATTAGATAACCCGTGTAGTCC

>Otu651

CCAGCCTACGGGGTGCAACAGTGGGGAATTTTGGACAATGGGCGCAAGCCTGATCCGGCC  
ATGCCGCGTGCGGGAAGAAGGCCTTCGGGTTGTAAACCGCTTTTGTGAGGGAAGAAACGG  
CTTCTCTAATACAGAGAGTTAATGACGGTACCTGAAGAATAAGCACCGGCTAACTACGT  
GCCAGCAGCCGCGTAATACGTAGGGTGCAAGCGTTAATCGGAATTACTGGGCGTAAAGC  
GTGCGCAGGCGGTTATGCAAGACAGAGGTGAAATCCCCGGGCTCAACCTGGGAACTGCCT  
TTGTGACTGCATAGCTAGAGTACGGTAGAGGGGGATGGAATTCGCGGTGTAGCAGTGAAA  
TGCGTAGATATGCGGAGGAACACCGATTGGCGAAGGCAATCCCCTGGACCTGTACTGACGC  
TCATGCACGAAAGCGTGGGGAGCAAACAGGATTAGAAACCCTCGTAGTCC

>Otu654

CCAGCCTACGGGTGGCAGCAGTTTCGAATCATTCACAATGGGCGAAAGCCTGATGGTGC  
ACGCCGCGTGAGGGATGAAGGTCTTCGGATTGTAAACCTCTGTCACCGGGGAAGAAACGC  
TTTGCGTTAATACTGCAAAGCCTGACTTAACCCGGAGAGGAAGCAGTGGCTAACTCTGTG  
CCAGCAGCCGCGGTAATACAGAGACTGCGAGCGTTATACGGATTCACTGGGCGTAAAGGG  
TGCGCAGGCGGCCAAGTGTGTAGGCGTGAAAGCCCGGGGCTTAACCCGGAATTGCACC  
TAAACTACATGGCTAGAGCATTTGGAGAGGGTAGCAGAATTCACGGTGTAGCAGTGAAAT  
GCGTAGATATCAAGCGGAACACCAGTGGCGAAGGCGAGTCTCTGGACATTTCTGACGCT  
GAGGCACGAAAGCCAGGGGAGCAAACGGGATTAGATACCCCTGTAGTCC

>Otu657

CCAGCCTACGGGGCGCAGCAGTAAGGGATATTGCACAATGGGCGAAAGCCTGATGCAGCA  
ACGCCGCGTGAGGGATGAAGGCTTTCGGGTCGTAAACTCCTTTTGGACCTGACGAGGAAG  
GACGGTAGGGTCCGAATAAGTCACGGCTAACTACGTGCCAGCAGCCGCGGTAAACGTAG  
GTGGCGAGCGTTATCCGGATTTACTGGGCGTAAAGCGTGTGCAGGCGGGGCACCAAGTGG  
TGTATGAAGGGTCTCGGCTCAACCGGGATAGGTTATGCCAGACTGGTGCTCTAGAGTACG  
AGAGAGGGGCGTGGAATTCCGGGTGTAGTGGTGAAATGCGTAGAGATCCGGAGGAACCCC  
AGAGGCGAAGGCGGCCCTGGCTCGATACTGACGCTCAGACACGACAGCATGGGGAGCG  
AACGGGATTAGAGACCCTAGTAGTCC

>Otu658

CCAGCCTATGGGCGCTCCAGTGGGGAATCTTGCGCAATGGGCGAAAGCCTGACGCAGCAA  
CGCCGCGTGAGGGATGAAGGCTTTCGGGTGTAAACCTCTTTCAAGCAGGGACGATAATG  
ACGGTACCTGCAGAAGAAGCTCCGGCCAACTACGTGCCAGCAGCCGCGGTAATACGTAGG  
GAGCGAGCGTTGTCCGGATTCATTGGGCGTAAAGAGCTCGTAGGCGGTTTGATAAGTCGG  
ATGTGAAACCTCCAGGCTCAACCTGGAGTCGCCATCTGATACTGTCATGACTAGAGTCCG  
GTAGGGGCCCACGGAACCTCCTGGTGTAGCGGTGAAATGCGCAGATATCAGGAAGAACACC  
GGTGGCGAAGGCGGTGGGCTGGGCCGGCACTGACGCTGAGGAGCGAAAGCGTGGGGAGCG  
AACAGGATTAGAGACCCGAGTAGTCC

>Otu662

CCAGCCTACGGGGGGCTGCAGTGGGGAATATTGGACAATGGGCGCAAGCCTGATCCAGCA  
ATGCCGCGTGAGTGATGACGGCCTTAGGGTTGTAAAGCTCTTTCGGCGGGGACGATGATG  
ACGGTACCCGCGAGAAGAAGCCCCGGCTAACTTCGTGCCAGCAGCCGCGATAATACGAAGG  
GGGCAAGCGTTGTTCCGAATTACTGGGCGTAAAGGGCGCGCAGGCGGCCTATCAAGTCAG  
ATGTGAAAGCCCCGGGCTCAACCTGGGAATAGCATTGTTGGGACTGTTAGGCTAGAGATCGG  
GAGAGGAGAGTGGAATTCACAGTGTAGAGGTGAAATTCGTAGATATTGGGAAGAACACCG  
GTGGCGAAGGCGGCTCTCTGGACCGATACTGACGCTGAGGCGCGAAAGCGTGGGGAGCAA  
ACAGGATTAGAAACCCCCGTAGTCC

>Otu665

CCAGCCTACGGGTTGCTCCAGCAACGAATCTTCCCCAATGCCGGAACGGTGAGGGAGCG  
ACGCCGCGTGAGGACGAAGTACTTCGGTATGTAAACTTCTAAAAGGGTTTTGAAAGACG  
AGCGCCTAATACGCGCAAAATTTGATCTGATCCTGATAAGGGGCGGCTAACTCTGTGCCA  
GCAGCCGCGGTAATACAGAGGCCCAAGCGTTACTGAGAATCACTGGGTTTAAAGGGTGC  
GTAGGTGGTCCGTTAAGTCAGTTGTGAAATCCCCGGGCTCAACCCGGGAACCTGCTTCTGA  
TACTGGCGGACTTGAGGCCAGTAGGGGTCCTAGAACAGACGGTGGAGCGGTGAAATGCG  
TAGATATCGTCTGGAATGCCTGTGGTGAAGACGGGTGACTGGGCTGGTTCTGACACTGAG  
GCACGAAAGCGTGGGGAGCGAACGGGATTAGAAACCCTTGTAGTCC

>Otu666

CCAGCCTACGGGGGGCACCAGTCGAGAATATTTGGCAATGGGCGAAAGCCTGACCATGCG  
ACACCGCGTGCTGGATGAAGTCCTTCGGGACGTAAACAGCTTTTATGGGGGAAGAAGTAA  
TTGACATTACCCCATGAATAAGGGGCTCCTAACTCTGTGCCAGCAGGAGCGGTAATACAG  
AGGCCCCGAGCATTATCCGGAATCACTGGGCGTAAAGGGTGTGTAGGCGGTCGTGTTAGT  
CCTTTGTAAAAGGTCTCTGGCTTAACCAGGGAACTGCAGGGGAAACGGCACGACTTCGAG  
GACGCGAGAGGTCTGGGGAACTCATGGTGTAGGGGTGAAATCCGTTGATATCATGGGGAA  
CACCAAATGCGAAGGCACCAGACTGGCGCGCTCCTGACGCTGAGACACGAAAGCGTGGGT  
AGCGAATGGGATTAGAAACCCGCGTAGTCC

>Otu670

CCAGCCTATGGGGGGCAGCAGTCGAGGATCATTCGCAATGGGCGAAAGCCTGACGATGCG  
ACGCTGTGTGAGCGATGAAGGCCTTCGGGTCGTAAAGCTCTTTCGCCTGGGAACAAGACA  
AAGGGGCGAATAGTCTCATAGTTTGAGGGTACCAGGTAAAGAAGCACCGGCTAACTCCGT

GCCAGCAGCTGCGGTAATACGGAGGGTGCAAGCATTAATCGGATTTATTGGGCGTAAAGG  
GCGCGTAGGCGGTTTCTTAAGTCAGATGTGAAATTCGGGGGCTCAAACTCGGAGCTGCAT  
TTGAAACTGGGAGACTGGAGTGTGACGAAGAAAACGGAATTCACATGTAGCGGTGAAA  
TGCGTAGATATGTGGAAGAACACCTGTGGCGAAAGCGGTTTCTAGTTAACTACTGACGC  
TGAGGCGCGAGAGCAAGGGGAGCAAACAGGATTAGATACCCAGTAGTCC

>Otu671

CCAGCCTACGGGAGGCACCAAGTGGGGAAAAATTGGACAATGGGGGAAACCTGATCCAGCG  
ACGCCGCGTGTGTGAAGAAGGCCTGCGGGTTGTAAAGCACTTTTAGTGGGGATGAAAAGT  
TCAGGGCTAATACCTTTGGATCTTGACCTAACCTACAGAAAAAGCACCGGCTAACTCTGT  
GCCAGCAGCCGCGGTAATACAGAGGGTGCGAGCGTTAATCGGAATTACTGGGCGTAAAGC  
GTGCGTAGACGGTTCTGTAAGTCGGATGTGAAATCCCCGGGCTCAACCTGGGAATTGCAT  
TCGAGACTGCAAAGCTAGGGTGCGGAAGAGGGAAGCGGAATTTCCGGTGTAGCGGTGAAA  
TGCGTAGATATTCGCAAGAACACCAAGTGGCGAAGGCGGCTCACTGGCCCGATACTGACGC  
TGAGGCACGAAAGCGTGGGGAGCAAACAGGATTAGAGACCCAGTAGTCC

>Otu672

CCAGCCTACGGGGGGGAGCAGTCAAGAATATTCCTCAATGGCCGAAAGGCTGAAGGAGCG  
ACGCCGCGTGTAGGATGAAGTCTTCGGATCGTAAACTACTTTTACATGGGAAGAATTTG  
TGACGGTACCATGCGAATAAGAGGTTGCTAACTCTGTGCCAGCAGCAGCGGTAATACAGA  
GACCTCAAGCGTTATCCGGATTTATTGGGCGTAAAGCGTCCGCAGGTGGCTCAGCGGGTC  
AGGGGTTAAACTTACTGCTCAACGGTAAGACTGCTCCTGAACTACTAAGCTAGAGTAT  
GGAAGAGGTAAGCGGAATTCTCGGTGTAGTCGTAATAAGCGTTGATATCGAGAAGAACAC  
CAAATGCGAAGGCAGCTTACTGGTACATTACTGACACTCAGGGACGAAAGCGTGGGGAGC  
AAACAGGATTAGATACCCCTGTAGTCC

>Otu673

CCAGCCCACGGGTGGCAGCAGGGAATATTGGACAATGGGCGCAAGCCTGATCCAGCCATG  
CCGCGTGAGTGATGAAGGCCTTAGGGTTGTAAAGCTCTTTTGGCGGGGAAGATAATGACG  
GTACCCGCAGAAATAAGCCCCGGCTAACTTCGTGCCAGCAGCCGCGGTAATACGAAGGGGG  
CAAGCATTGTTTCGGAATTACTGGGCGTAAAGGGTGCGTAGGCGGATTGGATAGTCAGATG  
TGAAAGCCCAGGGCTCAACCTGGAATTGCATTTGATACTGCCAGTCTGGAATATTGGAG  
AGGAACGTGGAATTCTCAGTGTAAGAGGTGAAATTCGTAGATATTGAGAGGAACACCAAGT  
GCGTAGGCGACGTTCTGGCCAAATATTGACGCTGAGGCACGAAAGTGTGGGGAGCAAACA  
GGATTAGAAACCTTCGTAGTCC

>Otu674

CCAGCCTACGGGAGGCTCCAGTCGAGAATTTTTCTCAATGGGGGAAACCTGAAGGAGCG  
ACGCCGCGTGAGGATGAAGTCTTCGGATTGTAAACTCCTGTCATTGGTGAACAAGATT  
GCCGTTAACTGCCGGTGGATTTGATAGTAGCCGAAGAGGAAGAGACGGCTAACTCTGTG  
CCAGCAGCCGCGGTAATACAGAGGTCTCGAGCGTTGTTTCGGATTCAATTGGGCGTAAAGGG  
TGCGTAGGCGGCGTGGCAAGTCTGATGTGAAATCCCCGGGGCTCAACCCCGGAAGTGCATT  
GGATACTGCCATGCTAGAGTACTGGAGAGGAGATTGGAATTTACGGTGTAGCAGTGAAAT  
GCGTATATATCGTAAGGAAGACCAAGTGGCGAAGGCGAATCTCTGGGCAGTTACTGACGCT  
GAGGCACGAAGGCCAGGGGAGCAAACGGGATTAGATACCCGTGTAGTCC

>Otu675

CCAGCCTACGGGAGGCACCAAGTAGGGAATTTTCCACAATGGACGAAAGTCTGATGGAGCA  
ACGCCGCGTGAGGATGAACCCCTTCGGGGCGTAAACTGCTTTTATCTGTGACGATTATG  
ACGGTAGCAGATGAATAAGGATCGGCTAACTCCGTGCCAGCAGCCGCGGTCATACGGAGG  
ATCCAAGCGTTATCCGGAATTACTGGGCGTAAAGAGTTGCGTAGGTGGCATGGTAAGTTG  
GTAGTGAAAGCGTTCGGCTCAACCGAATACACATTACCAAACTGCCAAGCTAGAGGATG  
AGAGAGGTTATTGAAATTCCCAGTGTAGGAGTGAATCCGTAGATATTGGGAGGAACACC  
GATGGCGTAGGCAGATAACTGGCTCATTCCTGACACTAAGGCACGAAAGCGTAGGTAGCA  
AACGGGATTAGAAACCTTAGTAGTCC

>Otu676

CCAGCCTATGGGTGGCACCAGTAGGGAATCTTGCGCAATGGGCGAAAGCCTGACGCAGCA  
ACGCCGCGTGGGGGATGAAGCTTCTCGGAGTGTAACCCCTTTTCGACCCGGACGAATGCC  
CGCAAGGGTTTGACGGTACGGGTATAAGAAGCCCCGGCTAACTACGTGCCAGCAGCCGCG  
GTAATACGTAGGGGGGCCAGCGTTGCTCGGAATTACTGGGCGTAAAGGGTCTGTAGGCGGT  
GCGGCAAGTGGGATGTGAAATCTCTGGGCTTAACCCAGAGGCTGCTTCCGAAACTGCCGC  
GCTAGAGGATGAGAGAGGCGAGTGGAATTGCGGGTGTAGCGGTGAAATGCGTAGATATCC  
GCAGGAACATCCGAGGCGAAGGCGGCTCGCTGGATCATTTCTGACGCTGAGAGACGAAAG

CTAGGGGAGCAAACAGGATTAGATACCCGTGTAGTCC

>Otu677

CCAGCCTATGGGGGGCAGCAGTAGGGAATTTTCCACAATGGGCGAAAGCCTGATGGAGCA  
ACGCCGCGTGAGGATGAAGGCCTTAGGGTCGTAAACTGCTTTTATATGTGAAGAATATG  
ACGGTAGCATATGAATAAGGATCGGCTAACTCCGTGCCAGCAGCCGCGGTCATACGGAGG  
ATCCAAGCGTTATCCGGAATTACTGGGCGTAAAGAGTTGCGTAGGTGGCAGAGTAAGTAG  
ATAGTGAAAGCGTACGGCTCAACCGTATATCCATTATCTAAACTGCTCAGCTTGAGGACG  
AGAGAGGTAACCTGGAATTTCTAGTGTAGGAGTGAAATCCGTGGATATTAGAAGGAACACC  
GATGGCGTAGGCAGGTTACTGGCTCGTTTCTGACACTAAGGCACGAAAGCGTGGGGAGCA  
AACGGGATTAGAAACCCCTGTAGTCC

>Otu680

CCAGCCTATGGGGGGCAGCAGTGGGGAATATTGGACAATGGGGGAAACCCTGATCCAGCA  
ATGCCGCGTGAGTGATGAAGGCCTTAGGGTTGTAAAGCTCTTTCGGCGGGGACGATGATG  
ACGGTACCCGCGAGAAGAAGCCCCGGCTAACTTCGTGCCAGCAGCCGCGGTAATACGAAGG  
GGGCGAGCGTTGTTTCGGAATTACTGGGCGTAAAGGGCGCGCAGGCGGCTCAGACAGTCAG  
ATGTGAAAGCCCCGGGCTTAACCTGGGAACCTGCATTTGATACTACTGAGCTTGAGTACGG  
GAGAGGATAGTGGAATTCACAGTGTGGAGGCGAAATTCGTAGATATTGGGAAGAACACCG  
GTGGCGAAGGCGGCTATCTGGACCGTAACTGACGCTGAGGCGCGAAAGCGTGGGGAGCAA  
ACAGGATTAGAAACCCCTGTAGTCC

>Otu681

CCAGCCTACGGGAGGCAGCAGTGGGGAATTTTGTGCAATGGGCGAAAGCCTGACACAGCG  
ACACCGCGTGAGCGAAGAAGCCCTTTGGGGTGTAAGCTCTGTCAGCTGGAACGAAAAAA  
ATGACGGTACCAGCAGAGGAAGCATCGGCTAACTACGTGCCAGCAGCCGCGGTAAGACGT  
AGGATGCGAGCGTTGTCCGGATTTATTGGGCGTAAAGAGTTCGTAGGTGGTTTGTAAAGT  
CTGATGTTAAAGATTGGGGCTCAACCCCTGAACATGCATTGGATACTGGCAGACTTGAGTG  
TGGTAGAGGCTAGTGGAATTCACAGTGTAGCGGTGAAATGCGTAGATATTGGGAAGAACA  
CCGGTGGCGTAGGCGACTAGCTGGGCCATAACTGACACTGAGGAACGAAAGCCAGGGTAG  
CGAATGGGATTAGATACCCCTGTAGTC

>Otu682

CCAGCCTATGGGGGGCACCAGTCGAGAATCTTTCGCAATGGGGGAAACCCTGACGACGCG  
ACGCCGCGTGAGGATGAAGGCCTTCGGGTGTAAACTCCTGTCAGCAGGGGAGAACAAG  
CTTTTGATGAATAATCGAGAGCTTTGACAGTACCTGCAGAGGAAGCCACGGCTAACTCTG  
TGCCAGCAGCCGCGGTAATACAGAGGTGGCAAGCGTTGTTTCGGATTTATTGGGCGTAAAG  
GGTCCGTAGGCGGCCTGGAAAGTTGGATGTGAAATCCACAGCTTAACTGTGGAACCTGCA  
TTCAAACTTCTAGGCTCGAGTGTGATAGGGGTAAAGGGAATTCCCGGTGTAAGGGTGAA  
ATCTGCAGAGATCGGGAGGAACACCAGTCGCGAAGGCGCTTTACTGGATCACTACTGACG  
CTGAGGGACGAAAGCCAGGGGAGCAAACGGGATTAGATACCCGAGTAGTCC

>Otu683

CCAGCCTATGGGGCGCAGCAGTCGAGAATTTTTCACAATGGGCGAAAGCCTGATGGAGCG  
ACGCCGCGTGGGGGATGAATGGCTTCGGCCCGTAAACCCCTGTCATTTCGCGAACAATGCC  
TGCGGCCTAACACGTCGAGGTTGATAGTAGCGGAAGAGGAAGGGACGGCTAACTCTGTG  
CCAGCAGCCGCGGTAATACAGAGGTCCCGAGCGTTGTTTCGGATTCACTGGGCGTAAAGGG  
TGCGTAGGTGGCCAGGTAAGTCTGATGTGAAATCTCGGAGCTTAACTCCGAAACTGCATT  
GGATACTATCTGGCTGGAGGGTTGGAGGGGGGACTGGAATTCTCGGTGTAGCAGTGAAAT  
GCGTAGATATCGAGAGGAACACCAGTGGCGAAGGCGAGTCCCTGGACAACCTCCTGACACT  
AAGGCACGAAAGCTAGGGGAGCAAACAGGATTAGAAACCCGCGTAGTCC

>Otu686

CCAGCCTATGGGGTGACAGCAGACGAGAATATTCCGCAATGGACGAAAGTCTGACGGAGCG  
AGGCCGCGTGATGGATGAAGTGCTTAGGTACGTAAACATCTTTTATCGGGGAAGAAATTA  
TTGACGGTACCCGATGAATAAGGGGCTCCTAACTCTGTGCCAGCAGGAGCGGTAATACAG  
AGGCCCCGAGCGTTACCCGGAATCACTGGGCGTAAAGGGTGTCCAGGCGGGCATATTAGT  
CTCTCGTAAAATCTATGGGCTTAACCTATAGCGCGCAGGGAAACGGTATGTCTAGAGGG  
CGCGAGAGATAGAGGGAACCTCATGGTGGAGGGGTGAAATCCGTTGATATCATGGGGAAACA  
CCGAAGGCGAAGGCACTCTATTGGCGCGTTCCCTGACGCTCACACACGAAAGCCAGGGGAG  
CGAACGGGATTAGATACCCCGTAGTCC

>Otu687

CCAGCCTATGGGGTGCTCCAGTGGGGAATATTGGACAATGGGCGCAAGCCTGATCCAGCA  
ATGCCGCGTGAGTGAAGAAGGTCTTCGGATTGTAAAGCTCTTTCGACGGGGACGATGATG



ACGGTACCTAGACAAGAAGCCCCGGCTAACTTCGTGCCAGCAGCCGCGGTAATACGAAGG  
GGGCTAGCGTTGTTTCGGAATTACTGGGCGTAAAGCGCGTGTAGGCGGGCGAATAAGTCAG  
GGGTGAAATGCCAAGGCTCAACCTTGGAAGTGCCTTTGATACTGTTCTGAGTCCGG  
GAGAGGTGAGTGGAAGTGCAGTGTAGAGGTGAAATTCGTAGATATTCGCAAGAACACCA  
GTGGCGAAGGCGGCTCACTGGCCCGGAAGTACGCTGAGACGCGAAAGCGTGGGGAGCAA  
ACAGGATTAGATACCCCCGTAGTCC

>Otu688

CCAGCCTATGGGTCGCACCAGTGGGGAATATTGGACAATGGGGGAAACCCTGATCCAGCA  
ATGCCGCGTGAGTGATGAAGGCCTTAGGGTTGTAAAGCTCTTTCGCCTGCGACGATGATG  
GCGGTAGCAGGAGAAGAAGCCCCGGCTAATTCGCGTCCAGCAGCCGCGGTAATACGGAAG  
GGGCTAGCGTTGTTTCGGAATTACTGGGCGTAAAGCGCGCGTAGGCGGCTCGTCAAGTGAG  
GCGTGAAAGTCTGGGCTCAACCTGGGGACGGCGCTTCAGACTGTCGGGCTAGAGTCCGG  
AAGAGGGTGGTGGAATTCGAGTGTAGAGGTGAAATTCGTAGATATTCGGAGGAACACCG  
GTGGCGAAGGCGGCCACCTGGTCCGGTACTGACGCTCAAGTGCGAAAGCGTGGGGAGCAA  
ACAGGATTAGAGACCCCTCGTAGTCC

>Otu691

CCAGCCTATGGGTCGCAGCAGTGGGGAATCTTGACAATGGAGGAAACTCTGATGCAGCG  
ACGCCGCGTGAGCGATGAAGCCCTTCGGGGTGTAAAGCTCTTTCGACGGGAACGATAATG  
ACGGTACCCGGAGAAGAAGCTGCGGCTAACTACGTGCCAGCAGCCGCGGTAATACGTAGG  
GGGCCAGCGTTGCTCGGAATTACTGGGCGTAAAGGGTCCGTAGGCGGTGTGGCAAGTCGG  
GAGTGAAATCTCTAGGCTTAACCTAGAGGCTGCTTTCGAAACTGCCGTGCTAGAGTGTGA  
GAGAGGCGAGTGGAATTACGGGTGTAGCGGTGAAATGCGTAGATATCCGTAGGAACATCC  
GAGGCGAAAGCGGCTCGCTGGATCACAACTGACGCTGAGGGACGAAAGCTAGGGGAGCAA  
ACAGGATTAGATACCCCTGGTAGTCC

>Otu696

CCAGCCTACGGGGTGCTCCAGTAGGGAATTTTCCACAATGGGCGAAAGCCTGATGGAGCA  
ACGCCGCGTGCGAGGACGAAGGCCTTCGGGTGTAAACTGCTTTTATATGTGACGATTATG  
ACGGTAGCATATGAATAAGGATCGGCTAACTCCGTGCCAGCAGCCGCGGTACATACGGAGG  
ATCCAAGCGTTATCCGGAATTACTGGGCGTAAAGAGTTGCGTAGGTGGCGGTACAAGTTG  
GTAGTGAAAGCGTTCGGCTCAACCGAATATACATTATCAAACTGTACAGCTAGAGGATG  
AGAGAGGTTATTGGAATTCCTAGTGTAGGAGTGAAATCCGTAGATATTAGGAGGAACACC  
GATGGCGTAGGCAGATAACTGGCTCATTCCTGACACTAAGGCACGAAAGCGTGGGGAGCG  
AACTGGATTAGATACCCGCGTAGTCC

>Otu699

CCAGCCTACGGGGGGCAGCAGTCGAGGATCTTCGGCAATGGACGCAAGTCTGACCGAGCG  
ACGCCGCGTGCGGGATGAAGGCCTTCGGGTGTAAACCGCTGTCAGTGGGGAGAAAGTCT  
ATAAGGGTACTCTCTTATAGTTGATCTATCCGCAGAGGAAGTGTGGGCTAAGTTTCGTGCC  
AGCAGCCGCGGTAAGACGAACCACACAAACGTTATTTCGGAATTACTGGGCTTAAAGGGTG  
CGTAGGCTGCGCAGAAAGTTGGGTGTGAAATACCTCGGCTCAACCGAGGAAGTGCGCCCA  
AGACTACTGTGCTTGAGGGAGACAGAGGTGAGCGGAACTGAGGGTGGAGCGGTGAAATGC  
GTTGATATCCTCAGGAACACCCGTGGCGAAAGCGGCTCACTGGGTCTCTTCTGACGCTGA  
GGCACGAAAGCTAGGGTAGCGAACGGGATTAGAAACCCCCGTAGTCC

>Otu700

CCAGCCTACGGGTGGCTGCAGTCGAGAATTTTTCTCAATGAGCGCAAGCTTGACGGAGCG  
ACACTGTGTGAGTGATGAAGGCCTTCGGGTGTAAAGCTCTTTTGTGTTGGGAACAAGAAA  
GATACGTGAATAACGTATCAATTTGAGGGTACTAGAAGAAAAAGTACCGGCTAACTACGT  
GCCAGCAGCTGCGGTAATACGTAGGGTACAAGCATTAAATCGGAATTATTGGGCGTAAAGG  
GCGCGTAGGCGGGGACGTAAGTCAGATGTGAAATACCAAAGCTCAACTTTGGTGCTGCAT  
TTGAAACTGCGTTTCTTGAGGACTGACGGAGAAAGCGGAATTCATGTGTAGCGGTGAAA  
TGCGTAGATACATGGAGGAACACCGGTGGCGAAAGCGGCTTCTAGTTTTTACCTGACGC  
TGAGGCGCGAGAGCAAGGGGAGCAAACAGGATTAGAGACCCAGTAGTCC

>Otu701

CCAGCCTACGGGGGGCTCCAGTCGAGAATCTTCCGCAATGGGCGAAAGCCTGACGGAGCG  
ACGTTACGTGAATGATGAAGCTCTTCGGAGTGTAAGTTCTTTTCTATGGGAGGAAGTTA  
TTGACAGTACCATAGGAATAAGGGGATCCTAATTCTGTGCCAGCAGGAGCGGTGAGACAG  
AATCCCCAAGCGTTACCCGGATTTATTGGGCGTAAAGGGTCCGTAGGTGGTTTTGGTAAAGT  
TGAAAGTTAAATCTCATCGGCTTAACCTTTGAGGTGCTTTCAATACTGCCAGACTTGAGG  
CGTTAGGGGTTAGCGGAACCGACGGAGTAGGGGTGAAATCCGTTGATATCGTCGGGAAC

ACCAAAAGCGAAGGCAGCTAACTAGGACGACCCTGACACTGAGGGACGAAAGCGTGGGGA  
GCAAAAAGGATTAGAAACCCCCGTAGTCC  
>Otu705  
CCAGCCTACGGGGTGCAGCAGTGGGGAATCTTGCACAATGGGCGAAAGCCTGATGCAGCG  
ACGCCGCGTGAGCGATGAAGGCCTTCGGGTGTAAAGCTCTGTGGGGAGGGACGAATAAG  
AATAGGCCAATATCCTATTCGATGACGGTACCTCCTTAGCAAGCACCGGCTAACTCTGTG  
CCAGCAGCCGCGGTAAGACAGAGGGTGCAAACGTTGTTTCGGAATCACTGGGCGTAAAGCG  
CGTGTAGGCGGCTATGTAAGTCGGACGTGAAAGCCACGGCTCAACTGTGGAAGTGCGCT  
CGAAACTGCGTAGCTTGAGTTTGGAGAGGAAGGCGGAATACTTGGTGTAGAGGTGAAAT  
TCGTAGATATCAGGTAGAACACCAGTGGCGAAGGCGGCCTTCTGGACAATGACTGACGCT  
GAGACGCGAAAGCGTGGGGAGCAAACAGGATTAGAAACCCCTGTAGTCC  
>Otu706  
CCAGCCTATGGGTGGCTGCAGTCGAGGATCTTTGGCAATGGGCGCAAGCCTGACCAAGCG  
ACGCCGCGTGTGCGATGAAGGCCTTCGGGTGTAAAGCACTGTGAGGGGGAGTAAGACC  
CGAAAGGGTTTGAAGTATCCCTGGAGGAAGCTCGGGCTAAGTTCGTGCCAGCAGCCGCGG  
TAAGACGAACCGAGCGAACGTTGTTTCGGAATCACTGGGCTTAAAGGGCGCGTAGGCGGGT  
ATGAAAGTCTGCGGTGAAATCCTCCAGCTTAACTGGAGAAGTGCCGTGGATACTGCACGT  
CTTGAGGAGGGTAGGGGCATCTGGAACGGTCGGTGGAGCGGTGAAATGCGTTGATATCGA  
CCGGAATCCGGTGGCGAAGGCGAGGTGCTGGACCCTTCTGACGCTGAGGCGCGAAAGC  
CAGGGGAGCAAACGGGATTAGAAACCCCCGTAGTCC  
>Otu707  
CCAGCCTACGGGATGCAGCAGTAGGGAATATTGCACAATGGACGAAAGTCTGATGCAGCA  
ACGCCGCGTGTGCGGATGAAGGCCTTCGGGTGTAAAGCGCTTTTCGGGAGGATGAGGAAG  
GACGGTACTCCCGGAATAAGTCACGGCTAACTACGTGCCAGCAGCCGCGGTAAAACGTAG  
GTGGCGAGCGTTATCCGGATTTACTGGGCGTAAAGCGTGTGCAGGCGGTCCGGTCAGTCG  
GATGTGAAATCTCTCGGCTCAACCGAGAGGGGTCATTCGATACTTCCGGACTTGAGGGCA  
GTAGAGGAAGGTGGAATTCCCGGTGTAGTGGTAAAATGCGTAGAGATCGGGAGGAACACC  
AGTGGCGAAGGCGGCCTTCTGGGCTGCCCCTGACGCTCAGACACGAAAGCTAGGGGAGCG  
AACGGGATTAGATACCCAGTAGTCC  
>Otu709  
CCAGCCTATGGGAGGCAGCAGTAACGAATCTTCCGCAATGCACGCAAGTGTGACGGAGCG  
ACGCCGCGTGTGGGACGAAGCCCCTCGGGGTGTAAACCACTGTCAGGGGATAGAAAGTTC  
TGATCATCCCCAGAGGAAGGCACGGCTAACTCTGTGCCAGCAGCCGCGGTAAAGACAGAGG  
TGCCAAGCGTTAGGCGGAATCACTGGGCTTAAAGCGTGTGTAGGCGGACCGTTAAGTACC  
TTGTGAAATCCCCCGGCTCAACCGGGGAAGTCTGGGTATACTGGCGGTCTTGGGCCACT  
CAGGGGCAGATGGAACAGGCGGTGGAGCGGTGAAATGCGTAGATATCGCCTGGAACGCCA  
AAGGAGAAATCAGTCTGCTGGGGGTGTGCCGACGCTGAGATACGAAAGCCAGGGGAGCGA  
ACGGGATTAGAGACCCCTGTAGTCC  
>Otu710  
CCAGCCTACGGGATGCTGCAGTAGGGAATTTTGCAGCAATGGGCGGAAGCCTGACGCAGCA  
ACGCCGCGTGAGTGATGAAGGCCTTCGGGTGTAAAGCTCTGTTGAGTGGGAAGAACTT  
CTCATGGATAATACCCATGGGGACTGACGGTACCCTTGAGGAAGCCCCGGCTAACTACG  
TGCCAGCAGCCGCGGTAAATACGTAGGGGGCAAGCGTTGTTTCGGAATCACTGGGCGTAAAG  
GGAGCGTAGGCGGAGATGTAAGTTGGGAGTGAAATTCACAGGCTCAACCTGTGACTTGCT  
TCCAATACTGCGTCTCTTGAGTATAGGAGAGGGCGATGGAATTCCAGGTGTAGCGGTGGA  
ATGCGTAGATATCTGGAAGAACACCAGTGGCGAAGGCGCCATCTGGCCTAATACTGACG  
CTCAGGCACGAAAGCTAGGGGAGCAAACAGGATTAGAGACCCCGTAGTCC  
>Otu712  
CCAGCCTATGGGGGGCTGCAGTCGGGAAAAATTTTGCAATGCGCGAAAGCGTGACAGAGCA  
AGCCAGAGTGATTTTCCGTATTGGAATACTTTTGTGAGATGTAAACATTCTTACGAATA  
AGGAGTGGGAGAGACTGGTGCCAGCCGCCGCGGTAAATCCAGCACTCCAAGTCGCAGCCA  
CAATTATTGGGTCTAAAACATCCGTAGCTTGCTTTGTAAGTCTTTTGTCAAATCGGGCCT  
CTTAAGGTTCCGGCGAGCAAAAGATACTGCTTAGCTAGGGACCGGGAGATGTAAGGAGTA  
CGAATGGAGTAGCGGTTAAATGCGTTGATCCTATTTGGACTAACAATAGCGAAGGCACCT  
TACAAGAACGGATCCGACAGTGAGGGATGAAGGCTAGGGGCGCAAATTGGATTAGAAACC  
CCTGTAGTCC  
>Otu713  
CCAGCCTATGGGAGGCACCAGTCGAGAATCATTCGCAATGGGCGAAAGCCTGACGATGCG

ACGCCGTGTGTATGATGAAGGCCTTCGGGTTGTAAAGTACTTTTCGCCTGGGAACAAGGGA  
AGCCGGCTAATATCCGGCGGACTTGAGGGTACCAGGTAAAGAAGCACCGGCTAACTACGT  
GCCAGCAGCTGCGGTAATACGTAGGGTGCAAGCATTAAATCGGATTTATTGGGCGTAAAGG  
GCGCGTAGGCGGAAGCGTAAGTCAGATGTGAAAGCCCGGGGCTCAACCCCGGAACAGCAT  
TTGAAACTGCGTTTCTAGAGGGTAGGCGGAGAAAATGGAATTCACAAAGTAGCGGTGAAA  
TGCGTAGATATGTGGAAGAACACCAGTGGCGAAGGCGGTTTTCTAGCTTACACCTGACGC  
TGATGCGCGAAAAGCAAGGGGATCAAACAGGATTAGAAACCCCTCGTAGTCC

>Otu714

CCAGCCTACGGGAGGCAGCAGTCGAGAATCTTCGGCAATGGGCGCAAGCCTGACCGAGCG  
ACGCCGCGTGCGGGATGAAGGCCTTCGGGTTGTAAACCGCTGTCAGTGCGGAGGAAATAT  
AGTGGGGTTCTCCCCATTATTTGACCTATGCGCAGAGGAAGGACGGGCTAAGTTCGTGCC  
AGCAGCCGCGGTAAGACGAACCGTCCAAACGTTATTCGGAATTACTGGGCTTAAAGGGTG  
CGTAGGCGGTCTGTAAAGTTGGGTGTGAAAAGACCTCGGCCTAACCGAGGAATTGCGCCCA  
AAACTGCCGGACTTGAGCAAGGCAGAGGTGAACGGAACCTTAGGGTGGAGCGGTGAAATGC  
GTTGATATCCTAAGGAACACCAGTAGCGAAAAGCGGTTCACTGGGCCTTTTCTGACGCTGA  
TGCACGAAAGCCAGGGGAGCGAACGGGATTAGATACCCCTGTAGTCC

>Otu716

CCAGCCTACGGGTGCTGTCAGTGGGGAATATTGGACAATGGGCGAAAGCCTGATCCAGCA  
ATGCCGCGTGAGTGATGAAGGCCTTAGGGTTGTAAAGCTCTTTTACCAGGGATGATAATG  
ACAGTACCTGGAGAATAAGCTCCGGCTAACTCCGTGCCAGCAGCCGCGGTAATACGGAGG  
GAGCTAGCGTTGTTTCGGAATTACTGGGCGTAAAGCGCACGTAGGCGGCGACTCAAGTCAG  
AGGTGAAAGCCCGGGGCTCAACCCCGGAACCTGCCTTTGAAACTAGGTTGCTAGAATTCTG  
GAGAGGTCAGTGGAATTCAGAGTGTAGAGGTGAAATTCGTAGATATTTCGGAAGAACACCA  
GTGGCGAAGGCGACTGACTGGACAGATATTGACGCTGAGGTGCGAAAGCGTGGGGAGCAA  
ACAGGATTAGATACCCTAGTAGTCC

>Otu719

CCAGCCTATGGGGTGCAACCAGTAAGGAATATTGGACAATGGTGGCAACACTGATCCAGCC  
ATGCCGCGTGAGTGATGAAGGCGCTACGCGTTGTAAACTGCTTTTGTACGGGAGAAAACC  
TATCTACGTGTAGATAGCTGATAGTACCGTAAGAATAAGCATCGGCTAACTTCGTGCCAG  
CAGCCGCGGTAATACGGAGGGTGCAAGCGTTATCCGGATTCACTGGGTTTAAAGGGTGCG  
TAGGTGGTCTGTAAAGTCAGCGGTGAAAGCCTGGAGCTTAACTCCAGAATTGCCATTGAT  
ACTGACGGACTTGAATCAAGTTGAGGTGGATGGAATATTACATGTAGCGGTGAAATGCTT  
AGATATGTAATAGAACACCGATTGCGAAGGCAGTTCACTAAGCTTGCATTGACACTGAGG  
CACGAAAGCGTGGGGATCAAACAGGATTAGAGACCCCCGTAGTCC

>Otu720

CCAGCCTATGGGTTGCTCCAGTGGGGAATATTGGACAATGGGGGCAACCCTGATCCAGCC  
ATGCCGCGTGAGTGATGAAGGCCTTCGGGTTGTAAAGCTCTTTTGGCGGGGACGATGATG  
ACGGTACCCGCGAGAATAAGCCCCGGCTAACTTCGTGCCAGCAGCCGCGGTAAGACGAAGG  
GGGCAAGCGTTGTTTCGGAATTACTGGGCGTAAAGCGAGTGTAGGTGGTTGTCGTAGTCAG  
GCGTGAAAGCCTTGAGCTCAACTCAAGAAAATGCGCTTGATACTGGGCAGCTAGAGGACTG  
GAGAGGATAGTGGAATTCACAGTGTAGTGGTGAAATACGTAGAGATTGGGAAGAACACCA  
GTGGCGAAGGCGGCTATCTGGACGGTTTTCTGACACTAAGACTCGAAAGCGTGGGGAGCAA  
ACAGGATTAGATACCCCCGTAGTCC

>Otu726

CCAGCCTATGGGGTGCTGTCAGTGGAGAATATTGGTCAATAAACGAAAGTTTGAACCAGCG  
TTTTGCGGGGATGATAGATTCATAGAATCATGAAGGCTATGACAGCTGTAAAGTCCGTCC  
GCAGGTTAGAAAAATGATTTTACACCTGAAGAGAACCCCGGGCCAACAACGTGCCAGCAG  
CTGCGGTAAGACGTTGACGGGGAAGCGTTACTGGCCATTACTAGGCGTAAAGAGTGGCTA  
GATGGTTTAAAGAACTTGAAAAAAAATCATAGAATAGTCGAAGACTTTTTCAAACCTTAA  
TACTTGAGGATTAAAGAGGTAAAGTATATACAAATTTAGAGATGAAATTCTAATAGATT  
GTAAAGATCTTCAGCGGCCTCGGCGACTTTCCATTTAATTTCCCTAACATTGAACCACTAA  
AGCACGAGTATCAATCAGGATTAGATACCCGAGTAGTCC

>Otu727

CCAGCCTACGGGATGCTGTCAGTGGGGAATCTTGCACAATGGGGGAAACCCTGATGCAGCG  
ACGCCGCGTGAGCGATGAAGCCCTTCGGGGTGTAAGCTCTTTTCGGCAGGAACGATTATG  
ACGGTACCTGCAGAAGAAGCTGCGGCTAACTACGTGCCAGCAGCCGCGGTAATACGTAGG  
CAGCGAGCGTTGTTTCGAGTTACTGGGCGTAAAGAGTATGTAGGCGGTTTCGTAAGTTTG  
GTGTGAAATCTCCCGGCTTAACTGGGAGGGTGCGCCGAAAACCTGCGAGGCTAGAGTGCGG

GAGAGGAGAGCGGAATTCCTGGTGTAGCGGTGAAATGCGTAGATATCAGGAGGAACACCG  
GCGGTGTAGACGGCTCTCTGGACCGTTACTGACGCTGAGATACGAAAGCGTGGGTAGCAA  
ACAGGATTAGAAACCAGAGTAGTCC

>Otu731

CCAGCCTACGGGGTGCTCCAGTAAGGAATATTGGACAATGGGGGCAACCCTGATCCAGCC  
ATGCCGCGTGAAGGATGAAGGCGCTCTGCGTCGTAAACTTCTTTTAGTTGGGAAAAATTG  
TTGGGTTTCTACCCGACTTGATTGTACCAAAAGAATAAGGACCGGCTAACTTCGTGCCAG  
CAGCCGCGGTAATACGAAGGGTCCAAGCGTTATCCGGATTTATTGGGTTTAAAGGGTGCG  
TAGGCGGGTTGTTAAGTCAGTGGTGAAATCTTGACGCTTAACTGTAAAATTGCCATTGAT  
ACTGACGATCTTGAGTACACTTGAAGTGGGCGGAATATGTCATGTAGAGGTGAAATTCTT  
AGAGATGGCATAGAACACCGATTGCGAAGGCAGCTCACTAAATTGTAAGTACGCTGAGG  
CACGAAAGCGTGGGGATCAAACAGGATTAGATACCCTGGTAGTCC

>Otu732

CCAGCCTATGGGAGGCAGCAGTGGGGAATCTTGCGCAATGGACGAAAGTCTGACGCAGCC  
ACGCCGCGTGAGTGAAGAAGGCCTTCGGGTCGTAAAGCTCTGTCGGAAGGGACGAAAAGT  
CTATGAGTTAATAGCTCATAGATCTGACGGTACCCTCAAAGGAAGCACTGGCTAACTTCG  
TGCCAGCAGCCGCGGTAATACGAGGGGTGCAAGCGTTGCTCGGAATTATCGGGCGTAAAG  
GGTAGGTAGGTGGTCTCGTTTGTCTGGGGTGAAAGCCTTGAGCTTAACTCAAGAAGTGCC  
CCAGAAACGGCGAGACTCGAGTCTTGAGAGGGTTCGTGGAATTCCTGGGTAGCGGTGAA  
ATGCGTAGAGATCGGGAGGAACACCAGAGGCGAAGGCGGCGACCTGGACAAGTACTGACA  
CTCAACTACGAAAGCGTGGGTAGCAAACAGGATTAGAGACCCGCGTAGTCC

>Otu733

CCAGCCTATGGGTGGCTCCAGAACAGTCAAGGGCCGCTTGCCGGAGGGCCGTGGAAGGGC  
CAGTGGTCCACCGCCCGCAGTGCCTTCACCCCTTAGCGGTCCCTGCGGCGCCAGCTATAAT  
TCCGCGAAGCTCTTGCGTCTCGTTTGGCCATGATGCTGTAATGCCGTAGCTGCTTGCGAA  
CAAACGTCATTTTTGCGGAAGAGGCGATCCGCCTGGCTATTTCGTAGCGATAATCTTGCCG  
CTTTCATCGAGCAAAATGACACCGACCGCCAGCCGGTCAAGGGCTTCAAGGGATGCTCGC  
TGGCGGCCTTCTAATTCCTCAAACCTTCGGTGAAGCTGTATTGCCCCTTGAGAGATGGGGG  
AACAAAAGCCGAGCAAGTTTACTTCGTGCGGTCCAAAGGGCTGCTTTCTGGAAGATCTG  
TGACAAGAAAGATTAGAAACCCGTGTAGTCC

>Otu734

CCAGCCTACGGGACGCACCAGTGGGGAATATTGGACAATGGGCGAAAGCCTGATCCAGCA  
ATGCCGCGTGTGTGAAGAAGGTCTTCGGATTGTAAAGCACTTTCGACAGGGACGATAATG  
ACGGTACCCGTAGAAGAAGCCCCGGCTAACTTCGTGCCAGCAGCCGCGGTAATACGAAGG  
GGGCTAGCGTTGCTCGGAATGACTGGGCGTAAAGGGCGCGTAGGCGGCGATTATAGTCAG  
ATGTGAAATTCTGGGCTCAACCTGGGGACTGCATTTGATACGTGATTGCTTGAGTGTGG  
AAGAGGGTCGTGGAATTCCTCAGTGTAGAGGTGAAATTCGTAGATATTGGGAAGAACACCG  
GTGGCGAAGGCGGCGACCTGGTCCATAACTGACGCTGAGGCGCGAAAGCGTGGGGAGCAA  
ACAGGATTAGATACCCGCGTAGTCC

>Otu735

CCAGCCTACGGGGCGCAGCAGTGGGGAATATTGGACAATGGGGGAAACCCTGATCCAGCA  
ATGCCGCGTGAATGATGAAGGCCTTAGGGTTGTAAAGTTCTTTCACCTGTGAAGATAATG  
ACGGTAGCAGGAGAAGAAGCCCCGGCTAACTCCGTGCCAGCAGCCGCGGTAAGACGGAGG  
GGGCTAGCGTTGTTTCGGAATGACTGGGCGTAAAGGGCGCGTAGGCGGTTTTTTAAGTGAG  
GCGTGAAAGCCCTGGGCTTAACCCAGGAGGTGCGTTTCATACTGGAGAATTGAGTACGA  
GAGAGGAAAGTGGAATTCCTAGTGTAGAGGTGAAATTCGTAGATATTAGGAAGAACACCA  
GAGGCGAAGGCGGCTTTCTGGCTCGTAACCTGACGCTGAGGCGCGAAAGCGTGGGGAGCAA  
ACAGGATTAGAGACCCGTGTAGTCC

>Otu742

CCAGCCTATGGGGATGCTCCAGTCAAGAACATTTGGCAATGGGCGAAAGCCTGACCATGC  
GACGCCGCGTGCTGGACGAAGTCCTTCGGGACGTAAACAGCTTTTATGCGTGAAGAAGTA  
ATTGACATTAGCGCATGAATAAGGGGCTCCTAACTCTGTGCCAGCAGGAGCGGTAATACA  
GAGGCCCAAGCATTATCCGGAATCACTGGGCGTAAAGGGTGTGTAGGCGGCGATATTAG  
TCTTCTGTTAAAGTTTTCAGGGCTTAACCCAGAAAATGCGGGAGAAACGGTATTGCTTGAG  
GTTGCGAGAGGTAGAGGGAATCATGGTGTAGGGGTGAAATCCGTTGATATCATGGGGAA  
CACCAAATGCGAAGGCACTCTACTGGCGCACACCTGACGCTGAGACACGAAAGCGTGGGG  
ATCGAACGGGATTAGAGACCCCTGTAGTCC

>Otu746

CCAGCCTACGGGGTGCACCAGTAGGGAATCTTCCGCAATGGACGCAAGTCTGACGGAGCA  
ACGCCGCGTGAGTGATGAAGGTTTTTCGGATCGTAAAGCTCTGTTGCCCTAGACGAACAGC  
AAGGAGAGTAACTGCTCTTTGTGTGACGGTATAGGAGAAGAAAGCCCCGGCTAACTACGT  
GCCAGCAGCCGCGGTAATACGTAGGGGGCAAGCGTTGTCCGGAATTATTGGGCGTAAAGC  
GCGCGCAGGCGGTCAATTTAAGTTTGGTGTTTAAGCCCCGGGGCTCAACCCCCGGTTTCGCATC  
GAAACTGGGTGACTGGAGTGTAGGAGAGGAAAGTGAATTCCACGTGTAGCGGTGAAAT  
GCGTAGAGATGTGGAGGAACACCAGTGGCGAAGGCGACTTTCTGGCCTATAACTGACGCT  
GAGGCGCGAAAGCGTGGGGAGCAAACAGGATTAGAAACCCGAGTAGTCC

>Otu751

CCAGCCTATGGGGGGCAGCAGTGTAGAATTTTAGACAATGCACGAAAGTGTGATCTAGTG  
ATATTTTCGTAAAGTGATGAATGACAGTATTACCACTGTAAAACCTTTTTGGTTAAAGATAAT  
AATGATAGTATTTAATTAATAAACACCGGCTAATTCCGTGCCAGCAGCCGCGGTAATACAG  
AAGGTGTAAACATTATCCATCTTAATTGGATGTAAAGGATATGTAGACGATTTGTTAAAA  
TTTTTCTGAAAGTTTTAATAGGTATTAAAGATGAGATTTTTAACTAACAATTTATGAGTT  
TAAAATAGGTGCGAATAATTTTATATGTAAGGTAAAATCTCTATATATATGAAGGAATA  
TCAAAATAATTGTGAAAACATCCCTCTAATTTAACTGACGTCGAGATATGAAAGTGTAG  
GTATCAAATTGGATTAGAAACCCCGGTAGTCC

>Otu755

CCAGCCTATGGGGTGCTCCAGTCGAGAATCTTCCGCAATGGGCGCAAGCCTGACCGAGCG  
ACGCCGCGTGAGGACGAAGGCCTTCGGGTGTAAACTCCTGTGAGGGGGAAGAAGGGC  
CTTAAAACCTTGACTGATCCCTGGAGGAAGCACGGGCTAAGTTCGTGCCAGCAGCCGCGG  
TAAGACGAACCGTGCGAACGTTATTCGGAATCACTGGGCTTAAAGCGCGTGTAGGTGGGA  
GGGTACGTCCGTCGTTGAAAGCCCCCGGCTCAACCGGGGAACTGGCGCGGATACGGCCTT  
CCTGGAGGGACGTAGGGGGACCTGGAACCTCCGGTGGAGCGGTGAAATGCGTTGAGATCG  
GAAGGAACGCCCGTGGCGAAAGCGAGGTCTGGACGTTTTCTGACACTGAGACGCGAAAG  
CCAGGGGAGCGAACGGGATTAGAAACCCAGTAGTCC

>Otu756

CCAGCCTTGGGGTGCACCAGTCGAGAATTTTTCTCAATGGGGGAGACCCTGAAGGAGCGA  
CGCCGCGTGAGGATGAAGGTCTTCGGATTGTAAACTCCTGTCAATTTGGGAACAAGTTGC  
ATCGGTTAACTGCCGATGCATTGATAGTACCAGAAGAGGAAGAGACGGCTAACTCTGTGC  
CAGCAGCCGCGGTAATACAGAGGTCTCAAGCGTTGTTTCGGATTCAATTGGGCGTAAAGGGT  
GCGTAGGTGGCGGGGCAAGTCAGGTGTGAAATCTCGGGGCTCAACCCCGAACTGCACTT  
GATACTGCCTTGCTTGAGTACTGGAGAGGAGATTGGAATTTACGGTGTAGCAGTGGAATG  
CGTAGATATCGTAAGGAAGACCAGTGGCGAAGGCGAATCTCTGGACAGTTACTGACACTG  
AGGCACGAAGGCCAGGGGAGCAAACGGGATTAGATACCCAGTAGTCC

>Otu759

CCAGCCTATGGGGGGCACCAGCTAAGAATCTTCCGCAATGGGCGAAAGCCTGACGGAGCG  
ATGCCGCGTGATCGATGAAGGTCGAGAGATTGTAAAGATCTTTTCCACGTGAGGAATAAC  
CATCGGAGGGAATGCCGGTGGGATGACGTTAGCGTGGGAATAAGCCCCGGCTAATTACGT  
GCCAGCAGCCGCGGTAACACGTAAGGGGCGAGCGTTGTTTCGGAATTATTGGGCGTAAAGG  
GCACGCAGGCGGTTATACAAGTCCGATGTTAAAGACCTGGGCTCAACTCAGGGGCTGCGT  
TGGAACCTGTATGACTAGAGTATTAGAGGGGGAGTCGGAATTCCTAGTGTAGGGGTGAAA  
TCTGTTGATATTAGGAAGAACACCGGTGGCGAAGGCGGACTCCTGGCTGGATACTGACGC  
TGAGGTGCGAAAGCATAGGGAGCAAACAGGATTAGATACCCCGGTAGTCC

>Otu761

CCAGCCTACGGGGCGCAGCAGTAGGGAATATTGCTTAATGGGCGAAAGCCTGAAGCAGCA  
ACGCCGCGTGATCGATGAAGGCCTTCGGGTGTAAAGTACTTTTTGAGGGGATGAGGAAG  
GACAGTACCCTCAGAATAAGCCTCGGCTAACTACGTGCCAGCAGCCGCGGTAACACGTAG  
GAGGCGAGCGTTATCCGGATTTACTGGGTGTAAAGCGCGTGTAGGCGGTCTGGATAGTTG  
GATGTGAAAGCTCCCGGCTTAACGGGAGAGGTCGTTCAATACTTCCAGACTAGAGTGTG  
AGAGAGGGAGGTGGAATTCCGGGTGTAGTGGTGAATGCGTAGATATCCGGAGGAACACC  
AGTGGCGAAAGCGGCCTCCTGGCTCACAACGACGCTCAGACGCGAAAGCTAGGGTAGCA  
AACGGGATTAGAGACCCGTGTAGTCC

>Otu762

CCAGCCTACGGGTGCGACCAGTCGAGGATCTTCGTCAATGGGGGAAACCCTGAACGAGCG  
ACGCCGCGTGCGCGATGAAGGCCTTCGGGTGTAAAGCGCGAAAGTGGGGACGAAAGCCG  
AAAGGTTTTGACCGATCCACAGTAAGCTCGGGCTAAGTTTCGTGCCAGCAGCCGCGGTAAAG  
CGAACCGAGCGAACGTTGTTTCGGAATCACTGGGCTTAAAGGGCGCGTAGGCGGGCATTCA

AGTCTATGGTGAAATCCTCCAGCTCAACTGGAGAACTGCCGTGGATACTGGGTGCCTCGA  
GGGAGGTAGGGGCGTGCGGAACCTAATGGTGGAGCGGTGAAATGCGTTGATATCATTAGGA  
ACTCCGGTGGCGAAGGCGGCACGCTGGACCTCTTCTGACGCTGAGGCGCGAAAGCCAGG  
GAGCAAACGGGATTAGAAACCCCTGTAGTCC

>Otu763

CCAGCCTACGGGTGGCAGCAGTCGAGAATCTTTCGCAATGGGCGCAAGCCTGACGAAGCG  
ACGCCGTGTGAGCGAAGAAGGCCTTCGGGTGTAAAGCTCTTTCGCTAGGGAACAAGAGA  
GACGCAGTAATATTGCGTCAATTTGATGGTACTTGGTAAAGAAGCACCGGCTAACTCCGT  
GCCAGCAGCTGCGGTAATACGGAGGGTGCAAGCATTGATCGGAATTACTGGGCGTAAAGG  
GCGCGCAGGCGGTTAGGAAAGTCAGATGTGAAATTCGGGGCTCAACCCCGGAGCTGCAT  
TTGAAACTTCCTTCTAGAGTTTAGTTAGGGAAAACGGAATTCACGTGTAGCGGTGAAA  
TGCGTAGATATGTGGAAGAACACCAGTGGTGAAGACGGATTTCTGGGCTATAACTGACGC  
TGAGGCGCGAAAGCATGGGGAGCAAACAGGATTAGAGACCCCGTAGTCC

>Otu764

CCAGCCTATGGGGCGCACCAAGTGAAGAAATTTGGACAATGGGCGCAAGCCTGATCCAGCC  
ATTCCGCGTGAGTGAAGAAGGCCTTCGGGTGTAAAGCTCTTTCGGCAGGAACGAAACGG  
TGGAGGCTAATACCTTTCATCAATGACGGTACCTGAAGAAGAAGCACCGGCTAACTACGT  
GCCAGCAGCCGCGTAATACGTAGGGTGCAGCGTTAATCGGAATTACTGGGCGTAAAGC  
GTGCGCAGGCGGTTTTGTAAAGACAGATGTGAAATCCCCGGGCTTAACCTGGGAAGTGCCT  
TTGTGACTGCAAGACTTGAGTGCGGCAGAGGGGGGTGGAATTCACGTGTAGCAGTGAAA  
TGCGTAGAGATGTGGAGGAACACCGATGGCGAAGGCAGCCCCCTGGGTCGACACTGACGC  
TCATGCAAGAAAGCGTGGGTAGCAAACAGGATTAGAAACCCGCGTAGTCC

>Otu765

CCAGCCTATGGGTTGCTGCAGTAGGGAATTTCCACAATGGGCGAAAGCCTGATGGAGCA  
ACGCCGCGTGAGGATGAAGGCTCTCGGGTCGTAAACTGCTTTTATATGTGACGATTATG  
ACGGTAACATATGAATAAGGATCGGCTAACTCCGTGCCAGCAGCCGCGGTCATACGGAGG  
ATCCAAGCGTTATCCGGAATTACTGGGCGTAAAGAGTTGCGTAGGTGGCATTGTAAGTTG  
GTAGTGAAAGCGTGGGGCTCAACCCCATAAACATTATCAAACTACAAAGCTAGAGGATG  
AGAGAGGTTATTGGAATTTCCAGTGTAGGAGTGAAATCCGTAGATATTGGGAGGAACACC  
GATGGCGTAGGCAGATAACTGGCTCATTCCTGACACTAAGGCACGAAAGCGTGGGTAGCA  
AACGGGATTAGATACCCGAGTAGTCC

>Otu766

CCAGCCTACGGGGTGCAGCAGTGGGGAATATTGGACAATGGGCGCAAGCCTGATCCAGCC  
ATGCCGCGTGAGTGATGAAGGCCCTAGGGTTGTAAAGCTCTTTCGCTGATGACGATGATG  
ACGGTAATCAGAGAAGAAGCCCCGGCTAACTTCGTGCCAGCAGCCGCGGTAATACGAAGG  
GGGCTAGCGTTGTTTCGGAATTACTGGGCGTAAAGGGCGCGTAGGCGGCATAGCAAGTTAG  
AAGTGAAAGCCCCGGGCTCAACCTGGGAATTGCTTTTGATACTGCTAAGCTTGAGTTCGG  
GAGAGGTGAGTGGAATTTCCAGTGTAGAGGTGAAATTCGTAGATATTGGGAAGAACACCG  
GTGGCGAAGGCGGCTCACTGGACCGACACTGACGCTGAGGCGCGAAAGCGTGGGGAGCAA  
ACAGGATTAGATACCCTAGTAGTCC

>Otu772

CCAGCCTATGGGTTGCACCAGTGGGGAATATTGGACAATGGGCGCAAGCCTGATCCAGCC  
ATGCCGCGTGAGTGATGAAGGCCCTAGGGTTGTAAAGCTCTTTTGTCCGGGAAGATAATG  
ACTGTACCGGAAGAATAAGCCCCGGCTAACTTCGTGCCAGCAGCCGCGGTAATACGAAGG  
GGGCTAGCGTTGTTTCGGAATCACTGGGCGTAAAGCGCACGTAGGTGGACATTTAAGTCGG  
AGGTGAAATCCCAAGGCTCAACCTTGGAACTGCCTTCGATACTGGGTGTCTTGAGTATGG  
TAGAGGTTAGTGGAAGTGAAGTGTAGAGGTGAAATTCGTAGATATTGGAAGAACACCA  
GTGGCGAAGGCGGCTAACTGGACCATTACTGACACTGAGGTGCGAAAGCGTGGGGAGCAA  
ACAGGATTAGAGACCCAGTAGTCC

>Otu774

CCAGCCTATGGGTTGCACCAGTGGGGAATATTGGACAATGGGCGCAAGCCTGATCCAGCC  
ATGCCGCGTGAGTGATGAAGGCCCTAGGGTTGTAAAGCTCTTTCGTCAGGGACGATAATG  
ACGGTACCTGAAGAAGAAGCCCCGGCTAACTTCGTGCCAGCAGCCGCGGTAATACGAAGG  
GGGCTAGCGTTGTTTCGGAATTACTGGGCGTAAAGCGCACGTAGGCGGGCTTTTAAGTCAG  
GGGTGAAATCCCCGGGGCTCAACCTCGGAAGTGCCTCTGATACTGGAAGTCTTGAGTTCGA  
GAGAGGTGAGCGGAATTGCGAGTGTAGAGGTGAAATTCGTAGATATTGCGAGGAACACCA  
GTGGCGAAGGCGGCTCACTGGCTCGATACTGACGCTGAGGTGCGAGAGCGTGGGGAGCAA  
ACAGGATTAGAAACCCGCGTAGTCC

>Otu777

CCAGCCTATGGGGTGCAGCAGTGGGGAATTTTGGACAATGGACGCAAGTCTGATCCAGCC  
ATGCCGCGTGCGGGAAGAAGGCCCTTCGGGTGTAAACCGCTTTTGTGTCAGGGAAGAAAAGT  
CTCGGGTTAATACCTTGGGATGATGACGGTACCTGAAGAATAAGCACCGGCTAACTACGT  
GCCAGCAGCCGCGGTAATACGTAGGGTGAAGCGTTAATCGGAATTACTGGGCGTAAAGC  
GTGCGCAGGCGGTTCTATAAGACAGATGTGAAATCCCCGGGCTCAACCTGGGAACTGCAT  
TTGTGACTGTAGAGCTGGAGTACGGCAGAGGGGGATGGAATTCGCGTGTAGCAGTGAAA  
TGCGTAGATATGCGGAGGAACACCGATGGCGAAGGCAATCCCCTGGGCCTGTACTGACGC  
TCATGCACGAAAGCGTGGGGAGCAAACAGGATTAGAAACCCAGTAGTCC

>Otu779

CCAGCCTACGGGGTGCTGCAGTCGAGAATTTTTCACAATGGGCGCAAGCCTGATGGAGCG  
ACGCCGCGTGGGGGATGAATGGCTTCGGCCCGTAAACCCCTGTCATTTGCGATCAAGGCG  
CATTATTTTAAAAGATGATGTGTTGATAGTAGCGAAAGAGGAAGGGACGGCTAACTCTGTG  
CCAGCAGCCGCGGTAATACAGAGGTCCCGAGCGTTGTTTCGGATTCACTGGGCGTAAAGGG  
TGCGTAGGTGGTGAGGTAAGTCGGATGTGAAATCTCGGAGCTCAACTCCGAAACGGCATT  
GGAAACTACCTTGCTGGAGGGTTGGAAGGGGGACTGGAATGCTTGGTGTAGCAGTGAAAT  
GCGTAGATATCAAGCGGAACACCAGTGGCGAAGGCGAGTCCCTGGACAACACCTGACACT  
GAGGCACGAAAGCTAGGGGAGCAAACAGGATTAGATACCCAGTAGTCC

>Otu780

CCCAGCCTATGGGTGGCACCAGTGGGGAATATTGGACAATGGGGGCAACCCTGATCCAGC  
AATGCCGCGTGAGTGATGAAGGCCCTTCGGGTGTAAAGCTCTTTCGCCCACGGCGATGGT  
GACGGTAGTGGGAGAAGAAGCCCCGGCTAACTTCGTGCCAGCAGCCGCGGTAATACGAAG  
GGGCTAGCGTTGTTTCGGAGTTACTGGGCGTAAAGGGCGCGTAGGCGGCTGTCCAAGTCG  
GGTGTGAAAGCCCAGGGCTCAACCCTGGATGTGCACTCGAGACTGGCCGGCCAGAGGACG  
GGAGAGGATGGTGGAAATCCCAGTGTAGAGGTGAAATTCGTAGATATTGGGAAGAACACC  
GGTGGCGAAGGCGGCCATCTGGACCGTTTCTGACGCTGAGGCGCGAAAGCGTGGGGAGCA  
AACAGGATTAGATACCCTGGTAGTCC

>Otu785

CCAGCCTACGGGGGGCTCCAGTCGAGAATCTTCCGCAATGGACGAAAGTCTGACGGAGCG  
ACGCCGCGTGAGAGGATGAAGTGCTTCGGCATGTAAACTCCTTTTGCCAGGGAAGAAAGTTA  
TTGATTGTACCTGGAGAATAAGAGGTTGCTAAACTCGTGCCAGCAGCAGCGGTAATACGA  
GTGCCTCGAGCGTTATCCGGAATCATTGGGCGTAAAGGGTGTGTAGGCGGCGATGTTAGT  
CTCGCGTAAAATCTTTCGGCTCAACCGAGAGTCCGCGCGGGAACGGCATCGCTTAGAGG  
ATGGTAGGGGTCTCTGGAACCTCTAGGTGTAGCGGTGAAATGCGTTGATATCTAGGGGAAC  
ACCGAAAGCGAAGGCAAGAGACTGGACCACTCCTGACGCTGAAACACGAAAGTGTGGGTC  
GCGAATGGGATTAGAAACCCCTGTAGTCC

>Otu786

CCAGCCTACGGGGCGCACCAGCAACGAATCTTCCCCAATGGGCGAAAGCCTGAGGGAGCG  
ACGCCGCGTGTTGGGATGAAGTCTTTCGGGATGTAAACCACTGTTAGGATTACGAAAGGTT  
AGGGTCTAATACGCCCCAAAACCTTGATCTAGTCCAGAGAAAGGGACGGCTAACTCTGTGCC  
AGCAGCCGCGGTAATACAGAGGTCCCAAGCGTTACTGAGAATCACTGGGTTTAAAGGGTG  
CGTAGGTGGTCTGTTAAGTTTGTGTGAAATCCCCGGGCTCAACCCGGGAATTGCTTCGA  
ATACTGGCAGACTTTGAGTCCTGTAGGGGTCCTGGAACAGACGGTGGAGCGGTGAAATGC  
GTAGATATCGTCTGGAACGCCCTGTGGTGAAGACGGGTGACTGGGCAGGTTCTGACACTGA  
GGCACGAAAGCGTGGGGAGCGAACGGGATTAGATACCCCTGTAGTCC

>Otu787

CCAGCCTACGGGAGGCTGCAGTGGGGAATATTGCACAATGGGCGAAAGCCTGATGCAGCA  
ACGCCGCGTGAGTGATGAAGGTCTTCGGATTGTAAACTCTGTCTTTGGGGACGATAATG  
ACGGTACCCAAGGAGGAAGCCACGGCTAACTACGTGCCAGCAGCCGCGGTAATACGTAGG  
TGGCAAGCGTTGTCCGGATTTACTGGGCGTAAAGGATGTGTAGGTGGATGCTTAAGTCAG  
ATGTGAAAGCCCCGAGCTTAACTTGGGGACTGCATTTGAAACTGGGCATCTAGAGTGCAG  
GAGAGGAAAGTGGAATTCCTAGTGTAGCGGTGAAATGCGTAGAGATTAGGAAGAACATCA  
GTGGCGAAGGCGACTTTCTGGACTGTAACCTGACACTGAGGCATGAAAGCGTGGGGAGCAA  
ACAGGATTAGATACCCCTGTAGTCC

>Otu788

CCAGCCTATGGGGGGCAGCAGTCGAGAATTTTTCACAATGGACGAAAGTCTGATGGAGCG  
ACGCCGCGTGAGAGGATGAAGGTTTTTCGGATTGTAAACTCCTGTCACTGCAGAACAAGGAT  
ATGCTCGTTAACAGCGAATGTATTTGATGGTATGCGGAGAGGAAGGGACGGCTAACTCTG

TGCCAGCAGCCGCGGTAAGACAGAGGTCCCGAGCGTTGTTCCGATTTCATTGGGCGTAAAG  
GGTGTGTAGGAGGTTGAGTAAGTCAGGTGTGAAATCTCAGGGCTTAACCCCTGAAACTGCG  
CTTGATACTGCTCGGCTAGAGGATCGGAGGGGGTATCGGAATTTATGGTGTAGCAGTGAA  
ATGCGTAGATATCATAAGGAACACCGGTGGCGAAGGCGGATACCTGGAAGATTCTCTGACT  
CTGGAACACGAAAGCCAGGGGAGCAAACGGGATTAGAAACCCCCGTAGTCC

>Otu789

CCAGCCTACGGGTGGCTGCAGTGGGGAATATTGGACAATGGGCGAAAGCCTGATCCAGCC  
ATGCCGCGTGAGTGATGAAGGCCTTAGGGTTGTAAAGCTCTTTTGCCAGGGAAGATAATG  
ACGGTACCTGGAGAATAAGCACCGGCTAACTTCGTGCCAGCAGCCGCGGTAATACGAAGG  
GTGCTAGCGTTGTTCCGAATTACTGGGCGTAAAGCGCGCGTAGGCGGTCATGCAAGTCAG  
GGGTGAAATCCCGGAGCCTAACTCCGGAACGCTTTGAAACTGCATGGCTGGAGTGTGT  
GAGGGGATAGCGGAATTGCTAATGTAGAGGTGAAATTCGTAGATATTAGCAGGAACACCG  
GTGGCGAAGGCGGCTATCTGGCACACAACCTGACGCTGAGGCGCGAAAGCGTGGGGATCAA  
ACAGGATTAGATACCCCGGTAGTCC

>Otu790

CCAGCCTACGGGAGGCACCAGTCGAGAATCTTCCGCAATGGACGAAAGTCTGACGGAGCG  
ACGCCGCGTGAGGATGAAGTTCTTCGGAATGTAAACTCCTTTTGCCAGGGAAGATAATG  
TTGATTGTACCTGGAGAATAAGAGGTTGCTAAACTCGTGCCAGCAGCAGCGGTAATACGA  
GTGCCTCAAGCGTTATCCGAAATCATTGGGCGTAAAGGGTGTGTAGGTGGCTGTGTAGT  
CTTGTGTAAATTTACCGGCTCAACCGGTAAGCTGCATGGGAAACGGCACGGCTTCGAGG  
ACGGTAGAGGTCTCTGGAACCTCTAGGTGTAGCGGTGAAATGCGTTGATATCTAGGGGAAC  
ACCAAAGCGAAGGCAAGAGACTGGACCGCTCCTGACACTGAAACACGAAAGCGTGGGTC  
GCGAATGGGATTAGATACCCCTCGTAGTCC

>Otu791

CCAGCCTATGGGAGGCACCAGTGGGGAATATTGGACAATGGGCGAAAGCCTGATCCAGCA  
ATACCGCGTGAAATGATGAAGGCCTTAGGGTTGTAAAGTTCTTTTAGTTGGGAAGATAATG  
ACGGTACCAACAGAAAAAGCCCCGGCTAACTCCGTGCCAGCAGCCGCGGTAAGACGGAGG  
GGGCTAGCGTTGTTCCGAATTACTGGGCGTAAAGGGCGCGTAGGCGGATTAGTAAGTTGG  
GAGTGAAAGCCCCGGGGCTTAACCTCGGAACTGCTTTCAAAACTGCTAGTCTAGAGTGAAG  
TAGGGGGTGATGGAATTCCTAGTGTAGAGGTGAAATTCCTTAGATATTAGGAGGAACACCG  
GTGGCGAAGGCGGTACCTGGACTTCAACTGACGCTGAGGCGCGAAAGCGTGGGGAGCAA  
ACAGGATTAGAAACCCCAGTAGTCC

>Otu792

CCAGCCTATGGGTCGCTCCAGTAGGGAATCTTGCGCAATGGGCGAAAGCCTGACGCAGCA  
ACGCCGCGTGGGGGATGAATGCCTTCGGGTGTAAACTCCTTTCAGCGGGAACGAAATTG  
ACGGTACCCGCGAGAAGAAGCCCCGGCCAACTACGTGCCAGCAGCCGCGGTGATACGTAGG  
GGGCGAGCGTTGTCCGATTTATTGGGCGTAAAGAGCTCGTAGGCGGTTTCGACAAGTCGG  
GTGTGAAACCCCCAGGCTTAACCTGGGGACGCCACTCGAAACTGTCTGACTAGAGTCCG  
GTAGGGGATCACGGAATTCCTGGTGTAGCGGTGAAATGCGCAGATATCAGGAGGAACACC  
AGTGGCGAAGGCGGTGATCTGGGCCGGTACTGACGCTGAGGAGCGAAAGCGTGGGGAGCG  
AACAGGATTAGAGACCCCAGTAGTCC

>Otu793

CCAGCCTATGGGTTGCACCAGTCGAGGATCTTCGGCAATGGGCGAAAGCCTGACCGAGCG  
ACGCCGCGTGCGGGATGAAGGCCTTCGGGTGTAAACCGCTGTCAGTGGGGAGGAAGTCT  
GGGAGGGATCACCTTCCAGTTGACCTATCCGCAGAGGAAGGACGGGCTAAGTTTCGTGCC  
AGCAGCCGCGGTAATACGAACCGTCCTAACGTTATTTCGGAATCACTGGGCTTAAAGGGTG  
CGTAGGCGGTTTCGTAAGTTGGGTGTGAAATCCCTCGGCTCAACCGAGGAATTGCGCCCA  
AACTGTGCAACTTGAGGGAGACAGAGGTGAGTGGAACCTAGGGTGGAGCGGTGAAATGC  
GTTGATATCCTAAGGAACACCGGTGGCGAAAGCGACTCACTGGGTCTTTTCTGACGCTGA  
GGCACGAAAGCTAGGGTAGCGAACGGGATTAGATACCCCTCGTAGTCC

>Otu794

CCAGCCTATGGGTTGCTCCAGGCGAGAATATTCCACAATGGACGCAAGTCTGATGGAGCG  
ACGCCGCGTGATGGATGAAGTGCTTCGGTACGTAAACATCTTTTATGGGGGACGAAGTTA  
TTGACGGTACCCCATGAATAAGGACCTCCTAACTCTGTGCCAGCAGGAGCGGTAATACAG  
AGGGTCCAAGCGTTACCCGGAATCACTGGGCGTAAAGGGTGTCTAGGCGGCCTGGTTAGT  
CGTTCGTTAAATCCGTGGGCCCTAACCTACGGTCTGCGAGCGAAACGGCCAGGCTCGAGGG  
CGCGAGAGGTGCACGGAACCTCATGGTGGAGGGGTGAAATCCGTTGATATCATGGGGAAACA  
CCAAAGGCGAAGGCAGTGCACCTGGTTCCTGACGCTCAAACACGAAAGCTAGGGTAG



CGAACGGGATTAGAAACCCCGTAGTCC

>Otu796

CCAGCCTATGGGACGCAGCAGTGGGGAATTTTCCGCAATGGGCGAAAGCCTGACGGAGCA  
ATACCGCGTGAGGGAGGAAGGCTCTTGGGTTGTAAACCTCTTTTCTCAGGGAATAAGAAA  
GTGAAGGTACCTGAGGAATAAGCATCGGCTAACTCCGTGTCAGCAGCCGCGGTAATACGG  
AGGATGCAAGCGTTATCCGGAATGATTGGGCGTAAAGCGTCCGCAGGTGGTGATGTAAGT  
CTGCTGTTAAAAAGTTTACGCTTAACTGGATAAGGGCGGTGGAACTACATGACTAGAGTA  
CAAACGGGGCAAGAGGAATTCCTGGTGTAGCGGTGAAATGCGTAGATATCAGGAAGAACA  
TCGGTGGCGAAGGCGTCTTGCTAGAATGAACTGACACTGAGGGACGAAAGCTAGGGGAG  
CGAATGGGATTAGAAACCCCTGTAGTCC

>Otu797

CCAGCCTATGGGGCGCAGCAGTCAAGAACATTCGACAATGGGCGAAAGCCTGATCGAGCG  
ACACCGCGTGACAGGATGAAGGCCCTCGGGTCGTAACTGCGGTAGTAACATAACAATGTA  
AATGAGTGTGTTACGGAAAGAGGTGGGTAACCTACGTGCCAGCACCAGCGGTAATACGTAG  
ACCTCAAGCGTTATCCGGATTTATTGGGCGTAAAGAGTATGTAGGAGGTTTTGCGCGTCT  
TTTGTTAAAGCCCAGGGCCTAACCCCTGGAAGTGCAGGAGATACGGCAGAACTAGAGGAGG  
TTAGAGGTGCATGGAACCTACGGTGTAGGGGTGAAATCCGTTGATATCGTGGGGAACACC  
AAAGGCGAAGGCAGTGCACCTGGGACCTTCCTGACTCTGATATACGAAAGCGTGGGGAGCA  
AAAAGGATTAGAGACCCCGTAGTCC

>Otu798

CCAGCCTATGGGTGGCAGCAGTGGGGAATTTTGGACAATGGGGGCAACCCTGATCCAGCC  
ATTCCGCGTGAGTGAAGAAGGCCCTTCGGGTTGTAAAGCTCTTTCAGCAGGAACGAAACGG  
TCATTTTTTAATAAAGATGGCTAATGACGGTACCTGAAGAAGAAGCACCGGCTAACTACGT  
GCCAGCAGCCGCGGTAATACGTAGGGTGCAGCGTTAATCGGAATTACTGGGCGTAAAGC  
GTGCGCAGGCGGTTCCATAAGACAGATGTGAAATCCCCGGGCTTAACCTGGGAACTGCGT  
TTGTGACTGTGGGACTGGAGTGTGGCAGAGGGGGGTGGAATTCACGTGTAGCAGTGAAA  
TGCGTAGAGATGTGGAGGAACACCGATGGCGAAGGCAGCCCCCTGGGTCAACACTGACGC  
TCATGCACGAAGGCGTGGGGAGCAAACAGGATTAGATACCCGAGTAGTCC

>Otu800

CCAGCCTACGGGTTGCTGCAGTCGAGGATCTTCGTCAATGGGCGCAAGCCTGAACGAGCG  
ACGCCGCGTGCGCGATGAAGGCCTTCGGGTTGTAAAGCGCGAAAGAGAAGATAAAACCGC  
AAGGTTGATAGACTCTCAGTAAGGACGGGCTAAGTTTCGTGCCAGCAGCCGCGGTAAGACG  
AACTGTCCTAACGTTGTTTCGGAATCACTGGGCTTAAAGGGCGCGTAGGCAGTCGACCAAG  
TCAGGGGTGAAATCCTGCAGCTTAACTGTAGAAGTGCCCTTGATACTGGTCGTCTCGAGG  
GAGGTAGGGGTGTGTGGAACCTCCAGTGGAGCGGTGAAATGCGTTGATATTGGAAGGAAC  
GCCGGAGGCGAAAGCGACGCACTGGACCTCTTCTGACGCTGAGGCGCGAAAGCTAGGGGA  
GCAAACGGGATTAGATACCCGTGTAGTCC

>Otu801

CCAGCCTATGGGAGGCAGCAGCCGAGAATCTTTAGCAATGGACGAAAGTCTGACTATGCG  
ACGCCGCGTGAGGGATGAAGGATTTTCGGTTCGTAAACCTCTTTTGGCAGGGAAGAAAAAG  
TTGCAGTTAATAGCTGCAAACTGACGGTACCTGCAGAATAAGCCACGGCTAACTCCGTG  
CCAGCAGCCGCGGTAATACGGAGGTGGCTAGCGTTACTCGGAATTATTGGGTGTAAAGGG  
CAAGTAGGCGGCTTAGTAAGTAGGGGGTGAATACTCTGGCTCAACCGGAGAAGTGCCTT  
CTAACTACTAGGCTTGAGTATGACAGAGGAATATGGAATTCTCGGTGTAAGGGTGAAT  
CTGTAGATATCGAGAAGAACACCAGCGGCGAAGGCGATATTCTGGGTCATTACTGACGCT  
AAATTGCGAAAGCTAGGGGAGCAAACAGAATTAGAGACCCCGTAGTCC

>Otu804

CCAGCCTACGGGGGGCTGCAGGCGAGAATATTCGCAATGGACGCAAGTCTGACGGAGCG  
ACGCCGCGTGAAAGATGAAGTGCTTAGGTACGTAACTTCTTTTATCGAGGAAGAACTAA  
TTGACGGTACTCGATGAATAAGGGGCTCCTAACTCTGTGCCAGCAGGAGCGGTAATACAG  
AGGCCCCGAGCATTACCCGGAATCACTGGGCGTAAAGGGTGTCCAGGCGGCCTTGTTAGT  
CTCGCGTAAATCCATGAGCTCAACTTATGGCGCGCGCGGGAACGGCAAGGCTCGAGGG  
CGCGAGAGATAGAGGGAACCTCATGGTGGAGGGGTGAAATCCGTTGATATCATGGGGAACA  
CCAAAGGCGAAGGCACTCTATTAGCGCGTTCCCTGACGCTCACACACGAAAGCCAGGGGAG  
CGAACGGGATTAGATACCCCTGGTAGTCC

>Otu807

CCAGCCTATGGGAGGCAGCAGTCGAGAATCTTTCGCAATGGGCGCAAGCCTGACGAAGCG  
ACGCCGTGTGAGCGAAGAAGGCCCTTCGGGTTGTAAAGCTCTTTCGCCAGGGAACAAGAAA

GCAGTGATAATAACGCTGCGATTTGATGGTACTTGGTAAAGAAGCACCGGCTAACTCCGT  
GCCAGCAGCTGCGGTAATACGGAGGGTGCAAGCATTGATCGGAATTACTGGGCGTAAAGG  
GCGCGTAGGCGGATTGGCAAGTCAGATGTGAAATTCGCGGCTCAACTGCGGAGCTGCAT  
TTGAAACTGCCAGACTTGAGCATAGTTAGGGAAAACGGAATTCACGTGTAGCGGTGAAA  
TGCGTAGATATGTGGAAGAACACCAGTGGTGAAGACGGTTTTCTGGGCTATTGCTGACGC  
TGAGGCGCGAAAGCTAGGGGAGCAAACAGGATTAGAAACCCCTCGTAGTCC

>Otu808

CCAGCCTACGGGTGGCAGCAGTCGAGGATCTTCGGCAATGGGCGCAAGCCTGACCGAGCG  
ACGCCGCGTGAAGGATGAAGGCCTTCGGGTGTAACTTCTGTGAGGGGGATCAAGGGC  
AACTTGAGTGATCCCTGGAGGAAGCACGGGCTAAGTTCGTGCCAGCAGCCGCGGTAAGAC  
GAACCGTGCGAACGTTGTTTCGGAATCACTGGGCATAAAGGGCGCGTAGGCGGCTTATCAA  
GTCAGGGGTGAAATCCGGCAGCTCAACTGTGCAAGTGCCTTTGATACTGATGAGCTCGAG  
GGAGGTAGGGGTATGTGAACTTCCGGTGGAGCGGTGAAATGCGTTGATATCGGAAGGAA  
CGCCGGTGGCGAAAGCGACGTACTGGACCTCTTCTGACGCTGAGGCGCGAAAGCTAGGGG  
AGCAAACGGGATTAGAAACCCCGTAGTCC

>Otu810

CCAGCCTATGGGGCGCAGCAGCCAAGAATCTTCGCAATGGGCGAAAGCCTGACGGAGCG  
ACGCCGCGTGAAGGAAGAAGGTCTTCGATTGTAACTTCTTTTGTGAGGGAAGAATAAG  
GAGCGAGGAAATGCGTCTCCGATGACGGTACCTGATGAATAAGCCCCGGCTAATTACGTG  
CCAGCAGCCGCGGTAATACGTAAGGGGCGAGCGTTGCTCGGAATTACTGGGCGTAAAGGG  
CGTGTAGGCGGTCTCACAAAGTCGAATGTAAAAAACCAGGGCTTAACCCCTGGGGCTGCGTT  
TGAAACTGTGAGACTTGAGTCTGGTGGAGGGCAATGGAATTCGCGGTGTAGCGGTGAAAT  
GCGTAGATATCGGGAAGAACACCGAAGGCGAAAGCAGTTGTCTATGCCAAGACTGACGCT  
GAGGCGCGAAAGCATGGGGATCAAACAGGATTAGATACCCCGTAGTCC

>Otu811

CCAGCCTATGGGGGGCTCCAGTGGGGAATTTTGGACAATGGGCGCAAGCCTGATCCAGCC  
ATGCCGCGTGAGTGAAGAAGGCCTTCGGGTGTAAAGCTCTTTCAGCAGGAACGAAATGG  
TTCGTGCTAATACCACGGAATGATGACGGTACCTGAAGAAGAAGCACCGGCTAACTACGT  
GCCAGCAGCCGCGGTAATACGTAGGGTGACGGCGTTAATCGGAATTACTGGGCGTAAAGC  
GTGCGCAGGCGGTTTTGTTAAGACAGGTGTGAAATCCCCGGGCTCAACCTGGGAAGTGC  
TTGTTACTGGCAGACTGGAGTGTGGCAGAGGGGGGTGGAATTCACGTGTAGCAGTGAAA  
TGCGTAGAGATGTGGAGGAACACCGATGGCGAAGGCAACCCCTGGGCTAACACTGACGC  
TCATGCACGAAAGCGTGGGGAGCAAACAGGATTAGAGACCCCTGTAGTCC

>Otu812

CCAGCCTACGGGAGGCACCAGTAAGGAATATTGGTCAATGGGCGGAAGCCTGAACCAGCC  
ATGCCGCGTGACAGGAAGACGGCCCTACGGGTGTAACTGCTTTTGCAGGGGAATAAACC  
TCGATATGTATATCGAGCTGAATGTACTCTGAGAATAAGGATCGGTTAACTCCGTGCCAG  
CAGCCGCGGTAATACGGAGGATCCAAGCGTTATCCGGATTTATTGGGTTTAAAGGGTGCG  
TAGGTGGCTTTTAAAGTCAGGGGTGAAAGACGGTAGCTTAACTATCGCAGTGCCTTTGAT  
ACTGAAGAGCTTGAATGAACTGGAGGTAAAGCGGAATGTGACAAGTAGCGGTGAAATGCAT  
AGATATGTCACAGAACACCAATTGCGAAGGCAGCTTACTACGGTTTTTATTGACACTGAGG  
CACGAAAGCGTGGGGAGCAAACGGGATTAGAGACCCCGGTAGTCC

>Otu814

CCAGCCTACGGGGGGCACCAGTCAAGAACATTGCAACAATGGGCGAAAGCCTGATCGAGCG  
ACACCGCGTGACAGGATGAAGGCCTTCGGGTGTAACTGCGGTAGATAGCTAACAATGCA  
AATGAGTGACTATTGGAAAGAGGTGGGTAACTACGTGCCAGCACCAGCGGTAATACGTAG  
ACCTCAAGCGTTATCCGGATTTATTGGGCGTAAAGCGCACGTAGGAGGTTTTGCGCGTCT  
TTTGTAAAGCCAGGGCCTAACCCTGGAAGTGCAGGAGATACGGCAGAACTAGAGGAGG  
TTAGAGGTGCATGGAATCACGGTGTAGGGGTGAAATCCGTTGATATCGTGGGGAACACC  
GAAGGCGAAGGCAGTGCCTGGGACCTTCTGACTCTGAGTTGCGAAAGCGTGGGGAGCA  
AAAAGGATTAGATACCCCTGTAGTCC

>Otu815

CCAGCCTATGGGGGGCTGCAGTGGGGAATCTTGCGCAATGGGGGAAACCCTGACGCAGCG  
ACGCCGCGTGCGGGATGAAGGCCTTCGGGTGTAAACCGCTTTCAGCAGGGACGAAATTG  
ACGGTACCTGCAGAAGAAGGCCCGGCCAACTACGTGCCAGCAGCCGCGGTAATACGTAGG  
GGCCTAGCGTTGTCCGGAATTATTGGGCGTAAAGAGCTCGTAGGCGGTTCCGGCAAGTCGG  
ATGTGAAATCTCCACGCTTAACGTGGAGGGGCCATTGGAACCTGCTGTGACTCGAGTCCG  
GTAGGGGAGTGTGGAATTCGCGGTGTAGCGGTGAAATGCGCAGATATCGGGAGGAACACC

AGTAGCGAAGGCGGCACTCTGGGCCGGTACTGACGCTGAGGAGCGAAAAGCGTGGGGAGCG  
AACAGGATTAGAGACCCGAGTAGTCC

>Otu816

CCAGCCTACGGGTGTGCTGCAGTCGAGAATCTTCGGCAATGGGCGCAAGCCTGACCGAGCG  
ACGCCGCGTGTGCGATGAAGGCCTTCGGGTGTAAAGCACTGTTCGAGGGGGAGGAAGCCG  
CAAGTTGACCTACCCCTGGAGGAAGCACGGGCTAAGTTCGTGCCAGCAGCCGCGGTAAAG  
ACGAACCGTGCGAACGTTGTTTCGGAATCACTGGGCTTAAAGGGCGCGTAGGCGGGTCACC  
AAGTCTGGGGTGAAATACTTCGGCTTAACCGGAGAACAGCTTCAGATACTGGTGGCCTAG  
AGGGAGGTAGGGGCTGTGGAACCTCCGGTGGAGCGGTGAAATGCGTTGATATCGGAAGG  
AACGCCGTTGGCGAAAGCGACGGGCTGGACCTCTTCTGACGCTGAGGCGCGAAAGCTAGG  
GGAGCAAACGGGATTAGAAACCCGAGTAGTCC

>Otu817

CCAGCCTATGGGAGGCTGCAGTGGGGAATCTTGCAACAATGGGCGAAAGCCTGATGCAGCG  
ACGCCGCGTGAGGGAAGAGGGCTTTCGGGTGTAAACCTCTTTCAGGTGGGACGAAGCTC  
CTCGGGTTAATAGCCAGAGGGTGACGGTACCGCCAGAAGAAGCCCCGGCTAACTACGTG  
CCAGCAGCCGCGTAATACGTAGGGGGCAAGCGTTGTCCGATTTATTGGGCGTAAAGAG  
CGTGTAGGCGGTAGGTAGGTCCGTTGTGAAAACCTCGAGGCTCAACCTCGAGACGCCGAT  
GGAAACCATCTAACTAGAGTCCGGAAGAGGAGAGTGGAATTCCTGGTGTAGCGGTGAAAT  
GCGCAGATATCAGGAAGAACACCCGTGGCTAAGGCGGCTCTCTAGTACGGTACTGACGCT  
GAGACGCGAAAGCGTGGGGAGCGAACAGGATTAGAAACCCCGGTAGTCC

>Otu819

CCAGCCTATGGGTGGCACCAGTGGGGAATCTTGCGCAATGCGCGAAAGCGTGACGCAGCA  
ACGCCGCGTGGGGGAAGACGGCCTTCGGGTGTAAACCCCTTTCAGTTGGGACGAAGGTT  
CACCGGTGAATAGCCGTTGGATTGATGGTACCTTCAGAAGAAGCCCCGGCTAACTACGT  
GCCAGCAGCCGCGTAATACGTAGGGGGCAAGCGTTGTCCGGAATCATTTGGGCGTAAAGA  
GCGTGTAGGCGGCTCGGTAAGTCCGCTGTGAAAGTCCAGGGCTCAACCTTGAATGCCGG  
TGGAACCTGTTCGAGCTAGAGTCCGGAAGAGGCGAGTGGAATTCCTGGTGTAGCGGTGAAA  
TGCGCAGATATCAGGAGGAACACCAATGGCGAAGGCAGCTCGCTGGGACGGTACTGACGC  
TGAGACGCGAAAAGTGTGGGGAGCAAACAGGATTAGATAACCCGCGTAGTCC

>Otu821

CCAGCCTACGGGTGGCAGCAGTGGGGAATTTTACGCAATGGGGGAACCCCTGACGTAGCG  
ACACCGCGTGAGCGAAGAAGCCCTTTGGGGTGTAAAGCTCTGTTCGGCTGGGACGAATAAA  
TGACGGTACCAGCAGAGGAAGCATCGGCTAACTACGTGCCAGCAGCCGCGGTAAGACGTA  
GGATGCGAGCGTTGTCCGATTTATTGGGCGTAAAGAGTTCGTAGGCGGTTTGTAAAGTC  
TGATGTTAAAGATCAGGGCCCCAACCTGGGAGTGCATTGGATACTGGCAGACTGGAGTGC  
AGTAGAGGCGAGTGGAATTCAGTGTAGCGGTGAAATGCGTAGATATTGGGAAGAACAC  
CGGTGGCGCAGGCGACTCGCTGGGCTGTAACTGACGCTGAGGAACGAAAGCTAGGGGAGC  
AAATGGGATTAGATAACCCCGTAGTCC

>Otu824

CCAGCCTACGGGACGCACCAGTAGGGAATATTGGACAATGGGCGCAAGCCTGATCCAGCA  
ATGCCGCGTGAGTGATGAAGGCCTTAGGGTTGTAAAGCTCTTTTGGCGGGGACGATGATG  
ACGGTACCCGCGAGAATAAGCTCCGGCTAACTTCGTGCCAGCAGCCGCGGTAATACGAAGG  
GAGCTAGCGTTGTTTCGGAATTACTGGGCGTAAAGGGTGCGTAGGCGGCTTTTTAAGTTTG  
GTGTGAAATCTCCCGGCTCAACTGGGAGGGTGCGCCGAATACTGAGAGGCTAGAGTGTGG  
GAGAGGAAAGTGGAATTCCTGGTGTAGCGGTGAGATGCGTAGATATCAGGAGGAACACCG  
GTGGTGTAAACGGCTTTCTTGACCATAACTGACGCTGAGGCACGAAAGCGTGGGTAGCAA  
ACAGGATTAGAAACCCGAGTAGTCC

>Otu828

CCAGCCTATGGGGGGCTCCAGTAGGGAATATTGCGCAATGGGCGAAAGCCTGACGCAGCA  
ATTCCGCGTGAGAGGACGAAGGATCTTGGTCTGTAAACTCCTTTCGGTGGTGACGATAATG  
ACGGTAGCCACAGAAGAAGCACCCGGCTAACTACGTGCCAGCAGCCGCGGTAAGACGTAGG  
GTGCAAGCGTTGTCCGATTTATTGGGCGTAAAGCGTTTCGTAGGCGGTTTGCCAAGTCTG  
GCGTTAAAGGCGGAGCTCAACTCCCGTATGGCGTTGGAACTGGCAAGCTAGAGTGTGGT  
AGAGGTAAGGGGAATTCCCGGTGTAGCGGTGAAATGCGTAGATATCGGGAGGAACACCG  
TGGCGAAAGCGCCTTACTGGACCATTACTGACGCTGAGGAACGAAAGCCAGGGTAGCGAA  
AGGGATTAGAAACCCGCGTAGTCC

>Otu829

CCAGCCTATGGGTGCGAGCAGTGGGGAATCTTGCAACAATGGGGGCAACCCCTGATGCAGCG

ACGCCGCGTGAGCGATGAAGCCCTTCGGGGTGTAAGCTCTTTTCGGCAGGAACGATAATG  
ACGGTACCTGAAGAAGAAGCTGCGGCTAACTACGTGCCAGCAGCCGCGGTAATACGTAGG  
CAGCAAGCGTTGTTTCGGAGTTACTGGGCGTAAAGAGAGCGTAGGCGGTCTCTAAGTTTG  
GTGTGAAATCTCCCGGCTCAACCGGGAGGGTGCGCCGAAGACTGGAGGGCTCGAGTATGG  
GAGAGGTAAGCGGAATTCCTGGTGTAGCGGTGAAATGCGTAGATATCAGGAGGAACACCT  
GTGGTGTAGACGGCTTACTGGACCATCACTGACGCTGAGGCACGAAAGCGTGGGTAGCAA  
ACAGGATTAGAAACCCGCGTAGTCC

>Otu830

CCAGCCTATGGGGTGCGAGCAGTGAGGAATATTGGTCAATGGGCGCAAGCCTGAACCAGCC  
ATCCCGCGTGAAAGGAAGAAGGCGCTATGCGTTGTAACTTCTTTTCCAGGGGACGAAAAT  
TTTGCACGTGTGCAGAACTGACGGTACCCTGGGAATAAGCATCGGCTAACTCCGTGCCAG  
CAGCCGCGGTAATACGGAGGATGCAAGCGTTATCCGGATTTATTGGGTTTAAAGGGTGCG  
TAGGCGGAAAAATAAGTCAGTGGTGAAAACCTGCAGCTTAACTGTAGAATTGCCATTGAT  
ACTGTTATTCTTGAGTGTGGTCAAGGTAGGCGGAATGTATAATGTAGCGGTGAAATGCTT  
AGATATTACACAGAACACCAATTGCGAAGGCAGCTTGCTGGGCCATTACTGACGCTGATG  
CACGAAAGCGTGGGGAGCGAACAGGATTAGATACCCTCGTAGTCC

>Otu831

CCAGCCTATGGGGGGCACCAGTGGGGAATCTTGCGCAATGGACGAAAGTCTGACGCAGCG  
ACGCCGCGTGGGTGATGAAGGCCTTCGGGTGTAAAGCTCTGTGGGGGAGACGAATAAG  
TGCAGCCTAATACGCTGCATGATGACGGTATCTCCTTAGCAAGCACCGGCTAACTCTGTG  
CCAGCAGCCGCGGTAAGACAGAGGGTGCAAACGTTGTTTCGGAATTACTGGGCGTAAAGCG  
TGTGTAGGCGGCATGTAAGTCAGATGTGAAAGCCCCAGGCTCAACCTGGGAAGTGCACC  
TGATACTGCATGGCTTGAGTATCGGAGAGGTTGGTGGAATTCTCGGTGTAGAGGTGAAAT  
TCGTAGATATCGAGAGGAACGCCGGCGGCGAAGGCGGCCAACTGGACGAATACTGACGCT  
GAGACACGAAAGCGTGGGGAGCAAACAGGATTAGATACCCTTGTAGTCC

>Otu833

CCAGCCTACGGGTGGCAGCAGTCAAGAATATTCCTCAATGGCCGAAAGGCTGAAGGAGCG  
ACGCCGCGTGAGGATGAAGGTCTTCGGATTGTAACTACTTTTACTAGGGAAGAATTTG  
TGACGGTACCTAGTGAATAAGAGGTTGCTAACTCTGTGCCAGCAGCAGCGGTAATACAGA  
GACCTCAAGCGTTATCCGGATTTATTGGGCGTAAAGCGTCCGTCCGTGGTTTAGTAAGTC  
AGGGGTCAAACCTGCCGCTTAACGGCAGGATCGCCTTTGATACTGCTAGACTCGAGTAT  
GGAAGAGGCAAGCGGAATTCTAGGTGTAGTCGTAATAAGCGTTGATATCTAGAAGAACAC  
CAAATGCGAAGGCAGCTTGCTGGTACATTACTGACACTCAGGGACGAAAGCGTGGGGAGC  
AAACAGGATTAGAGACCCGAGTAGTCC

>Otu834

CCAGCCTATGGGGGGCACCAGTCGAGAATTTTTCTCAATGGGGGAAACCCTGAAGGAGCG  
ACGCCGCGTGGGGGATGAATGGCTTCGGCCCGTAAACCCCTGTCATTCGGGAGCAATGCG  
TCTGGGTGAACATCTCAGACGTTGATAGTACCGGAAGAGGAAGGGACGGCTAACTCTGTG  
CCAGCAGCCGCGGTAATACAGAGGTCCCAAGCGTTGTTTCGGATTTACTGGGCGTAAAGGG  
TGCGTAGGTGGTTGGGTAAGTTTGATGTGAAATCTCCGGGCTTAACCCGGAATGCAATT  
GAATACTATTACGCTTGAGGATTGGAGGGGGGACTGGAATGCTCGGTGTAGCAGTGAAAT  
GCGTAGATATCGAGCGGAACACCAGTGGCGAAGGCGAGTCCCTAGACAATTCCTGACACT  
GAGGCACGAAAGCCAGGGGAGCAAACGGGATTAGATACCCGCGTAGTCC

>Otu835

CCAGCCTATGGGGCGCAGCAGTGGGGAATCTTGCGCAATGGGCGGAAGCCTGACGCAGCA  
ACGCCGCGTGAGCGAAGAAGGCCTTCGGGTGTAAAGCTCTGTGAGGAGGGACGAAGCCA  
CTCGGGTTAATAGCCCAGAGGGTGACGGTACCTCCAGAGGAAGGTCCGGCTAACTACGTG  
CCAGCAGCCGCGGTAATACGTAGGGACCTAGCGTTGTCCGGAATTATTGGGCGTAAAGAG  
CGTGTAGGCGGCTTGCCAAGTCCGATGTGAAAACCTCGGGGCTTAACCCGAGCCTGCATT  
GGAACTGTCTTGCTAGAGTCCGGAAGAGGGGACTGGAATTCCTGGTGTAGCGGTGAAAT  
GCGCAGATATCAGGAAGAACACCCGTGGCGAAGGCGGGTCCCTGGGACGGTACTGACGCT  
GAGACGCGAAAGCGTGGGGAGCGAACAGGATTAGAAACCCTCGTAGTCC

>Otu836

CCAGCCTATGGGGGGCAGCAGCAACGAATCTTCCCCAATGGGCGAAAGCCTGAGGGAGCG  
ACGCCGCGTGAAAGGACGAAGTTCTTCGGAATGTAACTTCTGTTAGGGTTATGAAAGTGA  
AGGGACCTAATACGTCCACAATTGATCTAGCCCAAAGAAAGGGACGGCTAACTCTGTGCC  
AGCAGCCGCGGTAATACAGAGGTCCCAAGCGTTACTGAGAACTCACTGGGTTTAAAGGGTG  
CGTAGGTGGTCCGTTAAGTTTCGTTGTGAAATCCCTGGGCTCAACCCAGGAAGTCTTCGA

ATACTGGCGGACTTGAGGCCGGTAGGGGTCACTGGAAGTACGGTGGAGCGGTGAAATGC  
GTAGATATCGTCAGGAACGCCGGTGGTGAAGACGGGTGACTTGGCCGGTTCTGACACTGA  
GGCACGAAAGCGTGGGGAGCGAACGGGATTAGAGACCCGAGTAGTCC

>Otu837

CCAGCCTATGGGGCGCAGCAGTTGGGAATCTTGCACAATGGGGGAAACCCTGATGCAGCG  
ACGCCGCGTGAGGACGAAGGGTCTAGGCTCGTAAACTCCTTTTATCGGGAAAGACTTAG  
GACGGTACCCGATGAATAAGCACCGGCTAACTACGTGCCAGCAGCCGCGGTAAGACGTAG  
GGTGCAGCGTTGTCCGGATTACTGGGCATAAAGAGCGCGTAGGCGGTCTGTTAAGTGT  
AGAGTGAAATCTCCAGGGCTCAACCCGAAACTGCTCTGCATACTGACAGACTAGAGGGA  
CGGAGAGGTATGTGGAATTCCTGGTGTAGCGGTGAAATGCGTTGATATCAGGAGGAACAC  
CCATGGCGAAGGCAGCATACTGGTCGTCTCTGACGCTGAGGCGCGAAAGCGTGGGTAGC  
AAACAGGATTAGATACCCTAGTAGTCC

>Otu839

CCAGCCTATGGGGGGCTGCAGTAGGGAATATTGCGCAATGGAGGAAACTCTGACGCAGCG  
ACGCCGCGTGGGTGATGAAGGCTTTCGGGTCGTAAAGCCCTGTCGGAAGGAAAGAAAATC  
ATTATGGCTAACATCCATAGTGTTTGACGGTACCTTTAAAGGAAGCACCGGCTAACTACG  
CGCCAGCAGCCGCGGTAATACGTAGGGTGCTAGCGTTGTTTCGGAATCATTGGGCGTAAAG  
CGCGTGTAGGTGGTTATGTAAGTCGAGTGTGAAATCCCTGGGCTCAACCGAGGAAGTGCA  
TCCGAAACTACATAGCTAGAGGACAGTAGAGGAAGGTGGAATTCCTAGTGTAGAGGTGAA  
ATTCGTAGATATTAGGAGGAATACCGGTGGCGAAGGCGGCCCTTCTGGGCTGGACCTGACA  
CTGAGACGCGAAAGCGTGGGTAGCAAACAGGATTAGAGACCCCTGTAGTCC

>Otu840

CCAGCCTACGGGACGCTGCAGTAGGGAATTTCCACAATGGACGAAAGTCTGATGGAGCA  
ACGCCGCGTGAGGAGGAAGGCCCTCGGGTCGTAAACTGCTTTTATTGGTGACAATTTTG  
ACGGTAGCCAATGAATAAGGACCTGCTAACTACGTGCCAGCAGCCGCGGTACATACGTAGG  
GTCCAAGCGTTATCCGGAATTACTGGGCGTAAAGAGTTGCGTAGGTGGCATAGTAAGCAA  
ATAGTGAAAGCGTGAGGCTCAACCTCATAACCATTATTTGAACTACTAAGCTTGAGTATG  
AGAGAGGTAGATGGAATTTCTAGTGTAGGAGTGAAATCCGTAGATATTAGAAGGAACACC  
GATGGCGTAAGCAGTCTACTAGCTCATTACTGACACTAAGGCACGAAAGCGTGGGGAGCG  
AACGGGATTAGATACCCTTGTAGTCC

>Otu842

CCAGCCTATGGGTGGCTGCAGTAACGAATCTTCCGCAATGCACGCAAGTGTGACGGAGCG  
ACGCCGCGTGTTGGGACGAAGTCCTTCGGGATGTAAACCACTGTCAGGGGTTACCAAGTTC  
TGAGGAGCCCCAGAGGAAGGCACGGCTAACTCTGTGCCAGCAGCCGCGGTAAGACAGAGG  
TGCCGAGCGTTAGGCGGAATCACTGGGCTTAAAGCGTGTGTAGGCGGGCCGTTAAGTATC  
TTGTGAAATCCCCCGGCTCAACCGGGGAATGGCTGGATATACTGGCGGTCTTGAGCAATC  
TAGGGGCGAGATGGAACAAGTGGTGGAGCGGTGAAATGCGTAGATATCACTTGGAACGCCA  
AAGGTGAAGACAGTCTGCTGGGGATTTGCTGACGCTGAGACACGAAAGCCAGGGGAGCGA  
ACGGGATTAGAAACCCTCGTAGTCC

>Otu843

CCAGCCTATGGGGGGCAGCAGTCGAGAGGCTTCGGCAATGGGGGAAACCCTGACCGAGCG  
ACGCCGCGTGGGCGATGAAGGCCGCTAGGTTGTAAAGCCCTGTCGAGTAGGAAGAAACGC  
AGGTGGGCGAACAGTCCATCTGCTTGACGGTACTGCTAAAGGAAGCTCCGGCCAACCTCCG  
TGCCAGCAGCCGCGGTAATACGGGGGGAGCGAACGTTGTTTCGGAATTACTGGGCGTAAAG  
GGCGTGCAGGCGGCCCTTGTAAGTGGGATGTGAAATGCCCTGGCTCAACCGGGAAATGCA  
TCTCAGACTGCAAGGCTTGAGTATAGGAGAGGATGGGGGAATTCCTGGTGTAGCGGTGAA  
ATGCATTGATATCGGGAGGAACACCAGTGGCGAAGGCGCCCATCTGGCCTAATACTGACG  
CTCAGGCGCGAAAGCTAGGGGAGCAAACAGGATTAGAAACCCGGGTAGTCC

>Otu845

CCAGCCTACGGGTCGCTGCAGTTTCGAATCATCCACAATGGGCGAAAGCCTGATGGTGCG  
ACGCCGCGTGAGGGATGAAGGCCCTTCGGGTCGTAAACCTCTGTCACCGGGGAGCAAATGT  
AAGACTTATACTCTTACTTGAGTTAACCCGGAGAGGAAGCAGTGGCAAACCTCTGTGCCAG  
CAGCCGCGGTAATACAGAGACTGCGAGCGTTACTCGGATTCAGTGGGCGTAAAGGGTGCG  
TAGGCGGCTAAATGTGTAGATGTGAAATCCCGGGGCTCAACTCCGGAACCTGCGTCTGAA  
ACTATTTAGCTAGAGACTCGGCGAGGTAAGCGGAATTCCAAGTGTAGCAGTGAAATGCGT  
AGATATTTGGAGGAACACCGAAGGCGAAGGCAGCTTACTGGAAGAGATCTGACGCTGAGG  
CACGAAAGCGTGGGGAGCAAAAGGGATTAGATACCCGCGTAGTCC

>Otu847

CCAGCCTATGGGGGGCAGCAGTCGAGGATCTTTCGCAATGGGCGAAAGCCTGACGGAGCG  
ACGCTGTGTGAGTGATGAAGGCCTTCGGGTCGTAAACTCTTTTGCCTGAGAACAAGAGC  
GATTCGTGAATAACGAGTCAATTTGAGGGTATCAGGAGAAAAAGCACCGGCTAACTACGT  
GCCAGCAGCTGCGGTAATACGTAGGGTGCAAGCATTAATCGGAATTATTGGGCGTAAAGG  
GCGCGTAGGCGGATGGATAAGTCAGATGTGAAATACCAAAGCTCAACTTTGGTGCTGCAT  
TTGAAACTGTTTATCTAGAGGATTGACGGAGAAAGCGGAATTCACGAGTAGCGGTGAAA  
TGCGTAGATACGTGGAGGAACACCGGTGGCGAAAGCGGCTTTCTAGTTTTTACCTGACGC  
TGAGGCGCGAAAGCGTGGGGAGCAAACAGGATTAGATACCCGCGTAGTCC

>Otu849

CCAGCCTATGGGGGGCAGCAGTAGGGAATATTGCACAATGGAGGAAACTCTGATGCAGCG  
ACGCCGCGTGAGTGATGAAGGACTTCGGTTCGTAAAGCTCTGTTGCAGGGGAATAATAAA  
GTGAAGGTACTCTGCAAGAAAGGTTCGGCTAACTTCGTGCCAGCAGCCGCGGTAAGACGA  
GGGACCCTAGCGTTGTTTCGGAATCATTGGGCGTAAAGCGGGTGTAGGTGGCTTTGTAAAGT  
CGGATGTGAAAGCCCAGGGCTCAACCTTGGAAGTGCATCTGATACTGCGAAGCTTGAGTG  
CCGGAGAGGTTACTAGAATTCCCTGGTGTAGTGGTGAAATACGTAGATATCAGGAGGAATA  
CCGGAGGCGAAGGCGGGTAACTGGCCGGACACTGACACTCAGACCCGAAAGCGTGGGATC  
AAACAGGATTAGAAACCCCAGTAGTCC

>Otu851

CCAGCCTATGGGTGGCACCCAGTCGAGAATCTTCGGCAATGGACGCAAGTCTGACCGAGCG  
ACGCCGCGTGTTGGGATGAAGGCCTTCGGGTGTAAACCACTGTCAGAGGGGATGAAATGC  
CGGTGGGTACTCCCATCGGTTTGACATAGCCTCAGAGGAAGGACGGGCTAAGTTCGTGCC  
AGCAGCCGCGGTAAGACGAACCGTCCGAACGTTATTTCGGAATCACTGGGCTTAAAGGGTG  
CGTAGGCGGTGCGGAAAGTTGGGTGTGAAATCCCTCGGCTTAACCGAGGAACTGCGCTCA  
AAACTACCGTGCTCGAGGGAGATAGAGGTGAGCGGAACTTAGGGTGGAGCGGTGAAATGC  
GTTGATATCCTAAGGAACACCGGTGGCGAAAGCGGCTCACTGGATCTCTTCTGACGCTGA  
GGCACGAAAGCTAGGGTAGCGAACGGGATTAGAAACCCCTAGTAGTCC

>Otu852

CCAGCCTACGGGATGCTGCAGTGGGGAATCTTGGGCAATGGGCGACAGCCTGACCCAGTG  
AGAACACATGCATGACGACGGCGTCTAGTTTTCTGTAAAGTGCTTTTTCGCGGTTTGACGA  
TAATGACTAAAAACCGAGAAGAAGTGCCGGCCAACTCCGTGCCAGCAGCCGCGGTAAGAC  
GGAGGGCGCGGGCGTTATTTCGTTTTGATTGGGTGTAAAGGGTACGTAGGCGGTTCCGATT  
TTTTAGGCTAAAAGAACAGAGTGATCCTTTGTGATGGCCTTTTATAAACAGGAGCTTGTG  
TTGGAGATAGGTTGGGTCAAATTCCTTCTTCAGGGGTAATATCCATAGAAATTGGGATGAA  
AGTCAGCATGCGGAGGCGCCTTTCTTGCTCCAACAGACGCTAAGGTACGGAAGCTTAGGT  
AGCAAACAGGATTAGAAACCCCTCGTAGTCC

>Otu853

CCAGCCTACGGGAGGCAGCAGTTAGGAATCGTCTACAATGCGCGCAAGCGTGATAGCGCG  
AGTCAGAGTGTTTCTCAACGAGAAACTTTTGCCAAATCTAAAACGTTTGGCGAATAAGGA  
CTGGGTAAGACTAGTGCCAGCCGCCGCGGTAATCCTAGCGGTCCAAGTCGCAGCCAACAT  
TATTGGGTCTAAAACATCCGTAGCTTGCTTAATAAGTTCTTTGTGAAATCCTGCGTCTCA  
AATGCAGGGCGTGCAAAGAGTACTGTAAAGCTAGAGACTGGAAGACGTAGAGAGTACGTT  
CGAAGTAGTGGTAAAATACGTTAATCTCGGACGGACTTACAATAGCGAAGGCACTCTACG  
AGGACAGTTCTGACAGTGAGGGATGAAGGCTAGGGTCGCGAAAGGGATTAGAAACCCCCG  
TAGTCC

>Otu856

CCAGCCTACGGGTGGCAGCAGTGGGGAATATTGGACAATGGGCGCAAGCCTGATCCAGCA  
ATTCCGCGTGGGTGAAGAAGGTCTTCGGATTGTAAAGCCCTTTTCGGCGGGGACGATGATG  
ACGGTACCCGCAGAAGAAGCCCCGGCTAACTTCGTGCCAGCAGCCGCGGTAATACGAAGG  
GGGCTAGCGTTGCTCGGAATTACTGGGCGTAAAGGGCGCGTAGGCGGCGCAAGTAGTCAG  
GCGTGAAATTCCTGGGCTCAACCTGGGGACTGCGCTTGATACGCTTGTGCTAGAGGACGG  
AAGAGGCTCGCGGAATTCACAGTGTAGAGGTGAAATTCGTAGATATTGGGAAGAACACCG  
GTGGCGAAGGCGGCGAGCTGGTCCGTTACTGACGCTGAGGCGCGACAGCGTGGGGAGCAA  
ACAGGATTAGAAACCCGTGTAGTCC

>Otu857

CCAGCCTATGGGGTGCTGCAGTGGGGAATATTGGACAATGGGCGCAAGCCTGATCCAGCC  
ATGCCGCGTGAGTGATGAAGGCCTTAGGGTTGTAAAGCTCTTTTGCCTGGGGGACGATAATG  
ACTGTACCCGGAGAATAAGTCCCGGCTAACTTCGTGCCAGCAGCCGCGGTAATACGAAGG  
GGACTAGCGTTGTTTCGGAATCACTGGGCGTAAAGCGCACGTAGGTGGATTGTAAAGTCAG

GGGTGAAATCCCGGGGCTCAACCTCGGAACTGCCTTTGATACTGCAAGTCTTGAGTCCGA  
TAGAGGTGGGTGGAATTCTAGTGTAGAGGTGAAATTCGTAGATATTAGGAAGAACACCA  
GTGGCGAAGGCGGCCACTGGATCGGTACTGACACTGAGGTGCGAAAGCGTGGGGAGCAA  
ACAGGATTAGAGACCCCAGTAGTCC

>Otu859

CCAGCCTATGGGGCGCTGCAGTCGAGAATCTTTCGCAATGGGCGCAAGCCTGACGAAGCG  
ACGCCGTGTGAGCGAAGAAGGCCTTCGGGTGTAAAGCTCTTTCGCTAGGGAACAAGAGA  
GGCGCGATAACACCGCGCTGATTTGAGGGTACTTGGTAAAGAAGCACCGGCTAACTCCGT  
GCCAGCAGCTGCGGTAATACGGAGGGTGCAAGCATTGATCGGAATTACTGGGCGTAAAGG  
GTGCGTAGGCGGCTCGATAAGTCAGATGTGAAATCCCACGGCTCAACCGTGGAACAGCAT  
TTGAAACTGTGCGACTTGAGCATAGTTAGGGAAAACGGAATTCACGTGTAGCGGTGAAA  
TGCGTAGATATGTGGAAGAACACCAGTGGTGAAGACGGTTTTCTGGGCTATAGCTGACGC  
TGAGGCACGAAAGCTAGGGGAGCAAACAGGATTAGAGACCCCTCGTAGTCC

>Otu860

CCAGCCTACGGGGTGCTGCAGCCGAGAATATTCGACAATGGGCGCAAGCCTGATCGAGCG  
ACGCCGCGTGATGGATGAAGTGCTTCGGCATGTAAACATCTTTTATAGACGAGAAAGTAA  
TTGATCAGTCTAAGAATAAGGAGTTGCTAAACTCGTGCCAGCAGCAGTGGAATACGAGT  
GCTCCAAGCGTTATCCGGAATCATTGGGCGTAAAGGGTGTGTAGGTGGTTATGTTAGTCT  
TCTGTTAAAGCTCTCGGCTTAACCGGGAAAATGCAGGGGAAACGGCACAACCTAGAGGATG  
CGAGAGGTATATGGAACCTCATGGAGTAGGGGTGAAATCCGTTGATATCATGGGGAAACACC  
AAATGCGAAGGCAGTATACTGGCGCACTCCTGACACTGAGACACGAAAGCGTAGGTAGCG  
AATGGGATCAGATAACCCAGTAGTCC

>Otu861

CCAGCCTACGGGGGGCAGCAGTGGGGAATTTTTCGCAATGGGGGAAACCCTGACGCAGCA  
ACGCCGCGTGAGGATGAAGTATCTTGGTACGTAAACTCCTTTTCGATGGGGAAGATAATG  
ACGGTACCCATAGAAGAAGCCCCGGCTAACTTCGTGCCAGCAGCCGCGGTAATACGAGGG  
GGGCAAGCGTTGTTTCGGAATTATTGGGCGTAAAGGGTGCGTAGGCGGTTTGATAAGTCTG  
GTGTGAAATCTATGGGCTCAACCCATAGTCTGCACTAGAAACTGTGCGGGCTTGAGTATGG  
GAGAGGTGAGTGGAATTTCCGGTGTAGCGGTGAAATGCGTAGATATCGGAAGGAACACCT  
GTGGCGAAAGCGGCTCACTGGACCATAACTGACGCTGAGGCACAAAAGCGTGGGTAGCAA  
ACAGGATTAGATACCCGTGTAGTCC

>Otu862

CCAGCCTATGGGGTGCTGCAGCGGGGAATATTGGACAATGGGGGAAACCCTGATCCAGCC  
ATGCCGCGTGAGTGATGAAGGCCTTAGGGTTGTAAAGCTCTTTTACCAGGGAAGATGATG  
ACGGTACCTGGAGAATAAGCACCGGCTAACTTCGTGCCAGCAGCCGCGGTAATACGAAGG  
GTGCTAGCGTTGTTTCGGAATCACTGGGCGTAAAGCGTGCGTAGGCGGCTTTCCAAGTCAG  
GGGTGAAATCCTGGGGCTCAACCCAGAAATGCCTTTGAAACTGGAAAGCTAGAGTATTG  
GAGGGGAGTGCGGAATTCCTAATGTAGAGGTGAAATTCGTAGATATTAGGAGGAACACCG  
GTGGCGAAGGCGGCGCTCTGGACAATAACTGACGCTCTGGCACGAAAGTGCGGGGATCAA  
ACAGGATTAGATACCCCTTGTAGTCC

>Otu863

CAGCCTATGGGGGGCAGCAGTGGGGAATATTGGACAATGGGCGCAAGCCTGATCCAGCAA  
TGCCGCGTGATGAAGAAGGTCTTCGGATTGTAAAGTCTTTTCGGCGGAGACGATGATGA  
CGGTACCCGCAGAAGAAGCCCCGGCTAACTTCGTGCCAGCAGCCGCGGTAATACGAAGG  
GGCTAGCGTTGCTCGGAATGACTGGGCGTAAAGGGCGCGTAGGCGGCTGTACAGTCGGG  
TGTGAAATTCCTGGGCTCAACCTGGGGGCTGCACCCGAGACGTGATGGCTAGAGTTTGAA  
AGAGGGTTCGTGGAATTCACAGTGTAGAGGTGAAATTCGTAGATATTGGGAAGAACACCG  
TGCGGAAGGCGGCGACCTGGTTCATTACTGACGCTGAGGCGCGAAAGCGTGGGGAGCAAA  
CAGGATTAGAAACCCAGTAGTCC

>Otu864

CCAGCCTACGGGAGGCAGCAGTAGGGAATCTTCCGCAATGGGCGAAAGCCTGACGGAGCA  
ATGCCGCGTGAGGGATGAAGGCCTTCGGGTGTAAACCTCTGTTGTTAGGGAAGAAGGTC  
GCCGTGAAAACGGTTGGCTTGACGGTACCTGACGAGGAAGCCCCGGCTAATTACGTGCCA  
GCAGCCGCGGTAATACGTAAGGGGCAAGCGTTGTCCGGAATCACTGGGCGTAGAGGGCGC  
GTAGGCGGTTTGATAAGTAGAAGGTGAAAGATTTCGGGCTCAACCCGAAAATTGCCTTCTA  
AACTGTCTTACTTGAGGGTCTGAGGGGAAACTGGAATTCACGGTGTAGCGGTGAAATGCG  
TAGATATCGTGGAGAACACCCGTGGCGAAAGCGGGTTTTCTGGCAGACTCCTGACGCTGAG  
GCGCGAAGGCTAGGGGAGCAAACGGGATTAGATACCCGCGTAGTCC

>Otu865

CCAGCCTATGGGGTGCTGCAGTGGGGAATATTGGACAATGGGGGCAACCCTGATCCAGCA  
ATGCCGCGTGTGTGAAGAAGGCCTGAGGGTTGTAAAGCACTTTCAGTGGGGAGGAGGGTA  
TG TAGGTTAAGAGCTGACATACTGGACGTTACCCACAGAAGAAGCACCGGCTAACTCCGT  
GCCAGCAGCCGCGTAATACGGAGGGTGCAGCGTTAATCGGAATTACTGGGCGTAAGG  
GTGCGTAGGTGGTTGATTAAAGTTATCTGTGAAATTCCTGGGCTCAACCTGGGCAGGTCAG  
ATAAGACTGGTTAACTGGAGTATGGGAGAGGGTAGTGGAATTTCCGGTGTAGCGGTGGAA  
TGCGTAGAGATCGGAAGGAACACCAGTGGCGAAGGCGGCTACCTGGCCTAATACTGACAC  
TGAGGCACGAAAGCGTGGGGAGCAAACAGGATTAGAAACCCCGTAGTCC

>Otu866

CCAGCCTACGGGAGGCTGCAGTCGAGAATTTTTTCACAATGGGGGAAACCCTGATGGAGCG  
ACGCCGCGTGGAGGACGAAGGGCTTCGTGCTTGTAAACTCCTGTCAAGCGGGAACAAGAA  
AGTGATAGTACCGCTAGAGGAAGAGACGGCTAACTCTGTGCCAGCAGCCGCGGTAATACA  
GAGGTCCCAAGCGTTGTTTCGGATTTCATTGGGCGTAAAGGGTGCCTAGGCGGCGTGGTAAG  
TCGAATGTGAAATCTCGGGGCTCAACCCCGAAACTGCACTCGATACTACCATGCTAGAGG  
ATTGTAGAGGAGATCGGAATTCACGGTGTAGCAGTGAAATGCGTAGATATCGTGAGGAAG  
ACCAGTTGCGAAGGCGGATCTCTGGGCAATTCCTGACGCTGAGGCACGAAGGCTAGGGGA  
GCAAACGGGATTAGATACCCCTCGTAGTCC

>Otu876

CCAGCCTACGGGGGGCAGCAGTCGAGAATATTCCCAATGGCCGAAAGGCTGAGGGAGCGA  
CGCCGCGTGCAGGACGAAGGGCTTCGGCTCGTAAACTGCTTTTTTTCAGGGAAGAACA  
ACGGTACCTGAAGGATAAGAGGTTGCTAACTCTGTGCCAGCAGCAGCGGTAATACAGAGA  
CCTCAAGCGTTATCCGGATTTACTGGGCGTAAAGGGTCCGCAGGTGGTCATGTGCGTCGA  
TGGTTAAATCCTCGGGCTCAACCCGAAACCGCCGTCGATACGGCATGACTAGAGGCCGG  
AAGAGGTAAGCGGAATTGCCGGTGTAGTAGTAATATGCGTTAATATCGGCAAGAACACCA  
AATGCGAAGGCAGCTTACTGGTACGCGCCTGACACTCAGGGACGAAAGCGTGGGGGAGCG  
AAAGGGATTAGAAACCCGTGTAGTCC

>Otu878

CCAGCCTACGGGAGGCTCCAGGCGCGAAACCTTTGCCATGCGCGAAAGCGTGACAGGGGA  
ATTCCGAGTGGTAGGGGGGTTTACCTCCCTATCTTTTGGCCAATCCAAACAATTGGCAGA  
ATAAGATCTGGGTAAGACCAGTGCCAGCCGCCATGCGCGTGATCATTTCGCACGCACGGCA  
CGGTACGCGGTAATACTGGCAGAGTAAGTGGTACCCACGAATATTGGGTCTAAAGAGTCC  
GTAGCGGGCCTGTTAAGTCCACTGTGAAATCTGGCGGCTCAACCGTCAGGCGTGCAGTGG  
ATACTGGCAGGCTTGGGAGTGGGGAGGTGCGGAGTACTCACGGGGTAACGGTAAATGT  
TGTAATCCTGTGAGGACTACCAGTGGCGAAGGCGCCCGACCAAACACGTCCGACCGTGA  
GGGACGAAGGCTAGGAGAACGAATCGGATTAGAAACCCGAGTAGTCC

>Otu880

CCAGCCTACGGGTCGCAGCAGTCGAGAATCTTTTCGCAATGGGCGAAAGCCTGACGAAGCG  
ACGCCGTGTGAGCGAAGAAGGCCTTCGGGTGTAAAGCTCTTTTCGCTAGGGAACAAGAAA  
GTCCGACTAATAATTGGATGATTTGATGGTACTTGGTAAAGAAGCACCGGCTAACTCCGT  
GCCAGCAGCTGCGGTAATACGGAGGGTGCAAGCATTGATCGGAATTACTGGGTGTAAAGG  
GCGCGTAGGCGGCAGAATAAGTCGGATGTGAAATTCGGGGGCTCAACCCCGGAGCTGCAT  
TTGAAACTATTTCAGCTAGAGGTTAGTAAGGGAAAACCGGAATTCACAGTGTAGCGGTGAAA  
TGCGTAGATATGTGGAAGAACACCGGTGGTGAAGACGGTTTTCTGTGCTAAACCTGACGC  
TGAGGCGCGAAAGCTAGGGGAGCAAACAGGATTAGATACCCCGTAGTCC

>Otu881

CCAGCCTATGGGGGGCAGCAGGTCGATAAACTGACGGGCGTTGCCCGGGCTGTCCAGCGG  
CAGATAGAAGATATGGTCTGCTCCGGTATAGTCCTTTTTTGGCCTCATATCCGGATGGAGA  
AAAGAAAGTCAGCACGATCCGGGGCCGAGGCTCCTGTCTGCGCAGCCCCCTCGATCACCGG  
CCGGCCCCTGCTCGAATTCCTCCGAGCGAAGAACAATGCATCCAGATCACCGGGTGTTCGC  
GTCCGCCGCACTCGCCGCGCCGGCATCTCCGGCACCTCGCTCATCTGCGCCGGCCCTGAT  
AGCTGTCATTTCTACCCTTATCCGGTCAAAAATTCCTTTCTGCCCCTCCAGCCATGCCTT  
CGCTTTCGGATTCCAGGGCGCGACAAGGCGAATGCCGACTTTATACAACCAAAAAAAC  
ATGATAAAAAATGATACTCAACTTCCGGCATTTATTTGATTAGAAACCCCTTGTAGTCC

>Otu883

CCAGCCTATGGGAGGCTCCAGTGGGGAATTTTTCGCAATGGGCGAAAGCCTGACGCAGCA  
ACGCCGCGTGGAGGATGAAGGCCTTCGGGTGCTAAACTCCTGTCAAGTAGGGACGAATGCT  
TCGCAAGAGGTTTGACTGTACCTGCTGAGGAAGCCACGGCTAACTCCGTGCCAGCAGCCG



CGGTAATACGGAGGTGGCAAGCGTTGTTTCGGAATTACTGGGCGTAAAGGGCGCGTAGGCG  
GCTTTGCAAGTCAGATGTGAAAGCCCCGAGCTTAACTCGGGAAGTGCATCTGAAACTGCT  
TAGCTTGAGTCCTGGAGGGGGTAGTGGAATTTCCAGTGCTAGCGGTGAAATGCGTAGATAT  
TGGGAGGAACACCTGCGGCGAAGGCGGCTACCTGGACAGTGAAGTACGCTGAGGCGCGAA  
AGCTAGGGGAGCGAACGGGATTAGAAACCCCCGTAGTCC

>Otu884

CCAGCCTATGGGGGGCAGCAGTGGGGAATATTGGACAATGGGGGAAACCTGATCCAGCA  
ATGCCGCGTGAGTGATGAAGGCCCTTCGGGTGTAAAGCTCTTTTATCAGGGACGATAATG  
ACGGTACCTGAGGAATAAGCACCGGCTAACTTCGTGCCAGCAGCCGCGGTAATACGAAGG  
GTGCTAGCGTTGTTTCGGAATAACTGGGCGTAAAGGGAGCGTAGGCGGCTAAGTACGTTTCG  
ATGTGAAAGTCTGGGCTTAACCTGGGGACTGCATTGGATACGGCTTAGCTTGAGGCATA  
GAGGGGAAGATGGAATTGCGTGTGTAGAGGTGAAATTCGTAGATATACGCAAGAACACCA  
GTGGCGAAGGCGATCTTCTGGCTATGACCTGACGCTAAGGCTCGAAAGCGTGGGGAGCAA  
ACAGGATTAGAGACCCTAGTAGTCC

>Otu885

CCAGCCTACGGGGGGCTGCAGTGAGGAATATTGGTCAATGGGCGCGAGCCTGAACCAGCC  
ATCCCGCGTGACAGGAAGACGGCCCTATGGGTGTAAAGCTCTTTTGTGCAGGAAGAACGC  
TCTCTACGTGTAGGGAGGTGACGGTACTGCATGAATAAGCACCGGCTAACTCCGTGCCAG  
CAGCCGCGGTAATACGGAGGGTGCAAGCGCTATCCGGATTTATTGGGTTTAAAGGGTGCG  
TAGGCGGTTAAATAAGTCAGTGGTGAAAATCTGCAGCTCAACTGTAGGGGTGCCATTGAA  
ACTGTTTTACTTGAGTAACCATGAGGTAGGCGGAATGTGTAGTGTAGCGGTGAAATGCTT  
AGATATTACACAGAACACCGATTGCGTAGGCAGCTTACTAGCGGTTTACTGACGCTGATG  
CACGAAAGCGTGGGGATCAAACAGGATTAGATACGTAGTCC

>Otu886

CCAGCCTATGGGGCGCACCAGTGGGGAATCTTGCGCAATGGACGAAAGTCTGACGCAGCC  
ACGCCGCGTGAGTGAAGAAGGCCCTTCGGGTGCTAAAGCTCTGTGCGAGGGGACGAAAAGT  
CGTACGGTTAATAGCCGTGCGATGTGACGGTACCCTCAAAGGAAGCACCGGCTAACTTCG  
TGCCAGCAGCCGCGAGTAATACGAGGGGTGCGAGCGTTGCTCGGAATTATTGGGCGTAAAG  
GGTAGGTAGGTGGTCTCGTTTTGTCTGGGGTGAAGAGCCTTGAGCTTAACTCAAGAAGTGCC  
CTAGAAACGGCGAGACTAGAAATCTGTGAGAGGGTTCGTGGAATTTCCCGGTGTAGCGGTGAA  
ATGCGTAGAGATCGGGAGGAACACCAGAGGCGAAGGCGGCGACCTGGAACAGTATTGACA  
CTCAACTACGAAAGCGTGGGTAGCAAACAGGATTAGAAACCCAGTAGTCC

>Otu887

CCAGCCTATGGGGGGCAGCAGTCGAGAATTTTTCTCAATGGGGGCAACCCTGAAGGAGCG  
ACGCCGCGTGAAGGATGAAGGTCTTCGGATTGTAAACTTCTGTCATTAGAGAACAAGTGC  
CGCCGAGTAACCTACCGGCGGCTTGATAGTATCTGAAGAGGAAGGGACGGCTAACTCTGTG  
CCAGCAGCCGCGGTAATACAGAGGTCCCAAGCGTTGTTTCGGATTCAATTGGGCGTAAAGGG  
TGCGTAGGTGGTATCGTAAGTTGGATGTGAAATCCCGGAGCTCAACTCCGGAAGTGCATT  
CAATACTGCGGTGCTTGAGTACTGGAGAGGAGATTGGAATTCACGGTGTAGCAGTGAAAT  
GCGTAGATATCTGAGGAAGACCAGTGGCGAAGGCGGATCTCTGGACAGTAAGTACACT  
GAGGCACGAAGGCCAGGGGAGCAAACGGGATTAGATACCCGAGTAGTCC

>Otu890

CCAGCCTACGGGGCGCAGCAGGGAATATTGCGCAATGAACGAAAGTCTGACGCAGCAACG  
CCGCGTGGATGATGAAGTATTTTCGGTATGTAAAATCCTGTGCGGTGGGGAAGAAACGTGTC  
GGTAGTAAGTATGATCGGCACCTGACGGTACCCACAGAGGAAGTCCCGGCTAACTCCGTGCC  
AGCAGCCGCGGTAATACGGGGGGGACAAGCGTTGTTTCGGATTTACTGGGCGTAAAGGGCG  
CGTAGGCGGGCCTTCAAGTCAGATGTGAAAACCTTCGAGCTTAACTCGGAGCCTGCATTG  
ATACTGTTGGTCTTGAGTACAGGAGAGGAGAGTGGAATTCAGGTGTAGCGGTGAAATGC  
GTAGATATCTGGAAGAACACCAGTAGCGAAGGCGGCTCTCTGGACTGATACTGACGCTCA  
AGCGCGAAGGCTTGGGGAGCAAACAGGATTAGAAACCCCTCGTAGTCC

>Otu892

CCAGCCTATGGGGGGCTGCAGTGGGGAATTTTGGACAATGGGGGCAACCCTGATCCAGCC  
ATGCCGCGTGTCTGAAGAAGGCCCTTCGGGTGTAAAGGACTTTTGCCGGGGAGCAAACT  
TACGGCTGAATAAGCCGTGGGGATGAGAGTACCTGGAGAATAAGCACCGGCTAACTACGT  
GCCAGCAGCCGCGGTAATACGTAGGGTGCGAGCGTTAATCGGAATTACTGGGCGTAAAGC  
GTGCGCAGGCGGTTTTTGCAAGTCTGATGTGAAAGCCCCGGGCTTAACCTGGGAACGGCAT  
TGGAGACTGCAAGACTAGAGTGCGTCAGAGGGGGGTAGAATTCACGTGTAGCAGTGAAA  
TGCGTAGAGATGTGGAGGAATACCGATGGCGAAGGCAGCCCCCTGGGATGACACTGACGC

TCATGCACGAAAAGCGTGGGGAGCAAACAGGATTAGATAACCCGCGTAGTCC

>Otu893

CCAGCCTACGGGGCGCACCAAGTGGGGAATTTTGGACAATGGGCGCAAGCCTGATCCAGCC  
ATGCCGCGTGTGTGAAGAAGGCCTTCGGGTGTAAAGCACTTTCGGCCGGAACGAAATCG  
CGCGGATTAATAACCCGCGTGGATGACGGTACCGGAAGAAGAAGCACCGGCTAACTACGT  
GCCAGCAGCCGCGGTAATACGTAGGGTGCAGCGTTAATCGGAATTACTGGGCGTAAAGG  
GTGCGCAGGCGGTTCCGCAAGTCAGGCGTGAAATCCCCGGGCTTAACCTGGGAATGGCGC  
TTGAAACTACGGGACTCGAGTATGGCAGAGGGAGGTGGAATTCACGTGTAGCGGTGAAA  
TGCGTAGAGATGTGGAGGAACACCGATGGCGAAGGCAGCCTCCTGGGCCAATACTGGCGC  
TCATGCACGAAAAGCGTGGGGAGCAAACAGGATTAGATAACCCCTGTAGTCC

>Otu894

CCAGCCTACGGGGCGCAGCAGACGAGAATATTCCGCAATGGACGAAAGTCTGACGGAGCG  
ACGCCGCGTGATGGATGAAGTGCTTTGGTATGTAAACATCTTTTATCGGGGACGAAGTTT  
ATTGACGGTACCCGATGAATAAGGGGCTCCTAACTCTGTGCCAGCAGGAGCGGTAATACA  
GAGGCCCAAGCATTACCCGGAATAACTGGGCGTAAAGGGTGTGTAGGCGGTTCATGGTAG  
TCGTTTCGTTAAATCCGCGGGCCTAACCTGCGGTCTGCGAACGAAACGCTATGACTCGAGG  
GCGCGAGAGGTGCACGGAACCTCATGGTGGAGGGGTGAAATCCGTTGATATCATGGGGAAC  
ACCAAAGGCGAAGGCAGTGCACCTGGTTCGTTCCCTGACGCTGAAACACGAAAGCCAGGGTA  
GCGAACGGGATTAGATAACCCGTGTAGTCC

>Otu895

CCAGCCTACGGGGGGCTCCAGTCGAGGATCTTCGGCAATGGGCGCAAGCCTGACCGAGCG  
ACGCCGCGTGTGCGATGAAGGCCTTCGGGTGTAAAGCACTGTGAGGGGGAGGAAGACC  
CGCAAGGGTTTGACCTATCCCTGGAGGAAGCACGGGCTAAGTTCGTGCCAGCAGCCGCGG  
TAAGACGAACCGTGCGAACGTTGTTTCGGATTCCTGGGCTTAAAGGGCGCGTAGGCGGCT  
TGCCAAGTCAGGGGTGAAATCTTTCGGCTTAACCGGAAAAGTGCTTCTGATACTGGCAGG  
CTGGAGGGAGGTAGGGGCAGATGGAACCTCCGGTGGAGCGGTGAAATGCGTAGATATCGG  
AAGGAACGCCGTGGCGAAAAGCGATCTGCTGGACCTCTTCTGACGCTGAGGCGCGAAAAGC  
CAGGGGAGCAAACGGGATTAGAAACCCCGGTAGTCC

>Otu896

CCAGCCTATGGGGGGCAGCAGTTGGGAATATTGCGCAATGGGCGAAAGCCTGACGCAGCA  
ACGCCGCGTGAGCGATGAAGTCTTCGGATCGTAAAGCTCTTTCGGCCGGGACGAAAACCT  
CACCGTTTAATAAGCGGTGACTTGACGGTACCGGAAGAAGAAGCACCGGCTAACTCTGTG  
CCAGCAGCCGCGGTAATACAGAGGGTGCAAGCGTTGTTTCGGAGTTATTGGGCGTAAAGCG  
CGTGTAGGCGGCTTTGTGTGTCGGGTGTGAAAGCCCTCGGCTTAACCGAGGAAGTGCGCC  
CGAAACTGCAGAGCTTGAGTGCCGGAGAGGAGAGCGGAACACCCGGTGTAGAGGTGAAAT  
TCGTAGATATCGGGTAGAACACCAGTGGCGAAGGCGGCTCTCTGGACGGCAACTGACGCT  
GAGACGCGAAAGCGTGGGGAGCAAACAGGATTAGAAACCCCGCGTAGTCC

>Otu897

CCAGCCTACGGGTGGCACCAAGTAGGGAATATTGGGCAATGGAGGCAACTCTGACCCAGCC  
ATGCCGCGTGACGACGAAGGCGCACAGCGTTGTAAACTGCTTTTGTGAGGGAAGAATGG  
TGGTTGTGCGCAATCATGTGACGGTACCTGATGAATAAGCACCGGCTAACTCCGTGCCAG  
CAGCCGCGGTAATACGAGGGTGCAAGCGTTGTCCGGATTTATTGGGTTTAAAGGGTGCG  
TAGGCGGGCTGATAAGTCTGGTTTGAAAGCTGGTTCGCTTAACGATCAGATGTGGCTGGAT  
ACTGTTAGTCTTGAAATTGTTGGAGGCAGCCGGAACGGGTCGCGTAGCGGTGAAATGCAT  
AGATATGACCCAGAACACCAATTGCGTAGGCAGGCTGCTACGACTGATTTGACGCTGAGG  
CACGAGAGCATGGGGAGCAAACAGGATTAGAGACCCTTGTAGTCC

>Otu902

CCAGCCTACGGGGTGCTGCAGTCAAGAATATTCCTCAATGGACGAAAGTCTGAAGGAGCG  
ACGCCGCGTGACCGATGAAGTCCCTCGGGATGTAAAGGTCTTTTCTTAGGGAAGAATAA  
TGACGGTACCCAAGGAATAAGAGGTTGCTAACTCTGTGCCAGCAGCAGCGGTAATACAGA  
GACCTCAAGCGTTATCCGGATTGATTGGGTGTAAAGCGTGCGCAGGCGGCTGATTAAAGCC  
GACGGTTAAATCTTGCGGCTCAACTGCAAGATTGCCGCCGGAACCTGGTCAACTCGAGCCT  
GGAAGAGGTGAGCGGAATTGCCGGTGTAAACGGTAAAATGTGTTAATATCGGCAAGAACAC  
CAGAGGCGAAAGCGGCTCACTGGTACATGGCTGACGCTGTGGCACGAAAGCGCGGGGAGC  
GAATGGGATTAGAAACCCCAAGTAGTCC

>Otu903

CCAGCCTATGGGGGGCAGCAGTGGGGAATCTTGCAACAATGGGGGAAACCCCTGATGCAGCG  
ACGCCGCGTGAGTGATGAAGTCTTCGGAGTGTAAGCTCTTTCGGCAGGGAAGAGATAA

GACGGTACCTGCAAAAGAAGCCCCGGCTAACTACGTGCCAGCAGCCGCGGTAATACGTAG  
GGGGCCAGCGTTGTTCGGAATTACTGGGCGTAAAGAGCGCGTAGGGCGGCGCAGTGTGTTT  
GGTGTGAAATCTCCCGGCTTAACCGGGAGGGGGCCATCGAAAACCTGCTGTGCTTCGGGTTT  
GGGAGAGGGGAGTGGAATTCCCGGTGTAGCGGTGAAATGCGTAGAGATCGGGAGGAACAC  
CAGCGACGAAGGTGGCTCCCTGGACCAATACCGACGCTGAGGCACGAAAGCTAGGGGAGC  
AAACAGGATTAGAAACCCTGGTAGTCC

>Otu908

CCAGCCTATGGGTTGCTGCAGTGGGGAATATTGGACAATGGAGGAAACTCTGATCCAGCG  
ATGTTTTGTGAGTGATTGACGGCATTTCGCTGTAAAGCTCTTTCGGCAACAGGGATAACGA  
CGCTGTTGAGGTAAGAAGTCCCGGCTAATTCCGTGCCAGCAGCCGCGGTAAAACGGGGGG  
GACCGGCGTTATTCGTAAGAAATTTGGCGTAAAGGGTACGTAGACGCGCCCGAGAACACTT  
CGGTCGAAAATCCATGGTCTGGATCGTGGGATAGACGCTGTAACCTCGGGGATAGAGTGG  
TGGCCACGTTACCGGAATTCTCGGTGTAGCAGGGGTAAATCCAACCATAACGGGAGGAA  
TGCTTTTGGTGAAGACAGGTTTCCGGGCTGCCACTGACGTTACAGGTACGGAGGTGTGAGT  
ATCAAACGGGATTAGATACCCGAGTAGTCC

>Otu910

CCAGCCTATGGGTTGCTGCAGTGGGGAATATTGGACAATGGGCGAAAGCCTGATCCAGCA  
ATGCCGCGTGTGTGAAGAAGGCCTTCGGGTTGTAAAGCACTTTCAGTAGGAAAGAAAAGC  
ACAGGGTTAATACCCCTGTGCCATGACGTTACCTAAAGAAGAAGCACCGGCTAACTCTGT  
GCCAGCAGCCGCGGTAATACAGAGGGTTCGAGCGTTAATCGGAATTACTGGGCGTAAAGC  
GTGCGTAGGCGGATATTTAAGTCAAATGTGAAATCCCCGGGCTTAACCTGGGAACTGCAT  
CCGATACTGGATATCTTAGAGTATGGTAGAGGAAAGTGGAATTCCCGGTGTAGCGGTGAA  
ATGCGTAGATATCGGGAGGAACATCAGTGGCGAAGGCGGCTTTCTGGACCAATACTGACG  
CTGAGGTACGAAAGCGTGGGGAGCAAACAGGATTAGAAACCCAGTAGTCC

>Otu911

CCAGCCTACGGGTGGCTCCAGGCGCGAAAACTTCGCAATGCGCGAAAGCGTGACGAGGCT  
ACCCGGAGTGATTTTTGAAGAAAAAATCTGTGGAGAGTGTCTAACAAGCCTCTCAAGAAA  
GGAGAGGGCAAGGCTGGTGCCAGCCGCCGCGGTAAAACCAGCTCTTCAAGTTGTCTGGGAC  
GATTACTGGGCTTAAAGAGTCCGTAGCCGGTTTAGCAAGTCCCTGGTAAAATCTGGCAGC  
TTAACTGTGAGTACGCTAGGGAACTACTTTACTAGAGGGCGGGAAAGGTCTGGGGTACT  
TCAGGGGTAGGGGTGGAATCCTATAATCCTTGGGGGACCACCAGTGGCGAAAGCGCCAGA  
CTGGAACGCGCCTGACGGTGAGGGACGAAAGCCAGGGGAGCAAACCGGATTAGATACCCCT  
GGTAGTCC

>Otu912

CCAGCCTACGGGTTGCTCCAGTAGGGAATCTTCCACAATGGGCGAAAGCCTGATGGAGCA  
ACGCCGCGTGCAAGATGAAGGCCTTCGGGTTGTAAACTGCTTTTATATGTGACGATTATG  
ACGGTAGCATATGAATAAGGATCGGCTAACTCCGTGCCAGCAGCCGCGGTCATACGGAGG  
ATCCAAGCGTTATCCGGAATTACTGGGCGTAAAGAGTTGCGTAGGTGGCATAAGTAAGCGG  
ACAGTGAATCGTGTGGCTCAACCACATAAACATTGCCTGAACTACTAAGCTAGAGGACG  
AGAGAGGTACCTGGAATTACCAGTGTAGGAGTGAAATCCGTAGATATTGGTAGGAACACC  
GATGGCGTAGGCAGGGTACTGGCTCGTTTCTGACACTAAGGCACGAAAGCGTGGGTAGCA  
AACTGGATTAGATACCCAGTAGTCC

>Otu914

CCAGCCTACGGGGGGGACCAGGAGGGAACATTGGTAATGGGCGAAAGCCCGAACCAGCAA  
CGCCGCGTGTGCGATGAAGGCCTTCGGGTTGTAAAGCACTTTTCACTCGGATGAGGAAGG  
ACAGTACGGGTGGAATAAGCCTCGGCTAACTACGTGCCAGCAGCCGCGGTAAAACGTAGG  
AGGCGAGCGTTATCCGGATTTACTGGGCGTAAAGCGCGTGTAGGCGGCTTGGAAGTTGG  
ATGTGAAAGCTCCCGGCTAAACTGGGAGAGGTCGTTCAAACTTCCAGGCTAGAGGATGG  
GAGAGGGAGGTGGAATTCCGGGTGTAGTGGTGAAATGCGTAGATATCCGGAGGAACACCA  
GTGGCGAAAGCGGCCTCCTGGCCACCCCTGACGCTCAGACGCGAAAGCTAGGGTAGCAA  
ACGGGATTAGAAACCCTAGTAGTCC

>Otu916

CCAGCCTATGGGTGGCAGCAGGCTAGGACAATCAGGCGTGCGCATTGATTCCGATTTGTC  
GATTAACAGGGCTATGTCGTGGCGACCGAGTTGTTCCAGTTCTGAAGCCGTCAGTTTGAC  
TGTACTTACTGTTTTTTCAACCCGAATTTGTATGGGTTTAAATGCTGGTTTGACCCGAGCT  
AAAATTGGAACATCGTTAGTGGGTGCCGTTGTTGGCGATGAAGTTGGAACGGGCGCCCC  
GCTATTGGTGGCATACCCGGGGCGCTGAAGCCTGTATTTATAGATATACGGGGCCGCGCT  
GTCGGCGGCGGACGAGCGCGTGTGAAAGATGATCCTGCGGAAATCACCGTTAGAAACAG

ACTTGCACCTAGCCGTAAAACTTTGAAAAGGATGGTTCGATTGAGACCGGGAAAAAGTTG  
CAATTAGAAACCCCCGTAGTCC  
>Otu919  
CCAGCCTATTGGGGGCACCAGTAGGGAATTTTCCACAATGGACGAAAGTCTGATGGAGCA  
ACGCCGCGTGAGGATGAAGGCCTTTGGGTCGTAAACTGCTTTTCTCTGTGAGGAATATG  
ACAGTAGCAGAGGAATAAGGATCGGCTAACTCCGTGCCAGCAGCCGCGGTCATACGGAGG  
ATCCAAGCGTTATCCGGAATTACTGGGCGTAAAGAGTTGCGTAGGCGGCAGAGTAAGCAG  
AATGTGAAATCGTGTGGCTCAACCATAACCCCATATTTTGAAGTCTCAGCTAGAGGATG  
AGAGAGGTGGCTGGAATTCCCAGTGTAGGAGTGAAATCCGTAGATATTGGGAGGAACACC  
GATGGCGTAGGCAGGCCACTGGCTCATTCCTGACGCTCAGGCACGAAAGCGTGGGGAGCG  
ACCGGGATTAGAAACCCCCGTAGTCC  
>Otu920  
CCAGCCTACGGGTCGCAGCAGTGAGGAATATTGGACAATGGGCGCAAGCCTGATCCAGCC  
ATGCCGCGTGAGTGATGAAGGCCTTAGGGTTGTAAACTCTTTTAGTGGGGAAAAATAATG  
ATGGTACCCACAGAAAAAGCTCCGGCTAACTTCGTGCCAGCAGCCGCGGTAATACGAAGG  
GAGCAAGCGTTACTCGGAATTACTGGGCGTAAAGCGCATGTAGGCGGAATTATAAGTTAG  
AGGTGAAAGCCCCGGGGCTCAACCCTGGAATTGCCTTTAAACTGTAATTCCTGAGTATGA  
CAGAGGATGGTGGAATTTCCAGTGTAGAGGTGAAATTCGTAGATATTGGAAGGAACACCG  
GTGGCGAAGGCGACCATCTGGGTCATAACTGACGCTGAGATGCGAAAGCGTGGGGAGCAA  
ACAGGATTAGAAACCCCTGGTAGTCC  
>Otu921  
CCAGCCTACGGGAGGCTGCAGTGGGGAATATTGGACAATGGGCGCAAGCCTGATCCAGCC  
ATGCCGCGTGAGTGATGAAGGCCCTAGGGTTGTAAAGCTCTTTTGGCAGGGAGGAAGGTA  
TGTATTTTAAAGAGATAACATATTTGACTGTACCTGCAGAATAAGCACCGGCTAACTCTGT  
GCCAGCAGCCGCGGTAATACAGAGGGTGCAAGCGTTAATCGGAGTTACTGGGCGTAAAGG  
GCGCGTAGGCGGTCGTATAAGTGAGATGTGAAATCCCTGGGCTTAACCTAGGAACTGCAT  
CTCATACTGTGCGACTAGAGTATTGTAGAGGGTAGTGGAATTTCCGGTGTAGCGGTGAAA  
TGCGTAGAGATCGGAAGGAACACCACTGGCGAAGGCGGCTACCTGGACAAATACTGACGC  
TGAGGCGCGAAAGCGTGGGGAGCAAACAGGATTAGATAACCCAGTAGTCC  
>Otu922  
CCAGCCTACGGGGGGCAGCAGTGGGGAATATTGGACAATGGACGAAAGTCTGATCCAGCA  
ATACCGCATGAGTGATGAAGGTCCATTTTGATTGTAAAGCTCTTTCGTAAAGGAAGATTA  
TGACATTACTTAAAAAAGAAGCCCCGGCTAACTTCGTGCCAGCAGTCGCGGTAAACGGG  
GGGGGCGAGTGTTACTCTACATAACTGGGCGTAAAGGGCATGTAGGTTGTTTTTTATGTT  
TTTAGTAAAAGTCTAAAGCTCACTTTAGAATCGCTATTAATACTAATAGACTTGAGTAT  
TTAAGAAGATTATTGAATTCCTAATGGAGAGGTGAAATTCCTAAGAGATTAAGAAGGCACT  
CAAAGGTGAAGACAATAATCTATTATATACTGACGCTGATATGCAAAGCATAGGGATCA  
AACAGGATTAGAAACCCCGGTAGTCC  
>Otu924  
CAGCCTACGGGGTGACACCAGTTGGGAATCTTGACAATGGGGGAAACCCTGATGCAGCGA  
CGCCGCGTGAGGATGACGGGTCTAGGCCTGTAAACTCCTTTTACCAGGAAAGACTTAGG  
ACGGTACCTGGTGAATAAGCACCGGCTAACTACGTGCCAGCAGCCGCGGTAAGACGTAGG  
GTGCAAGCGTTGTCCGATTTACTGGGCGTAAAGGGCGCGTAGGCGGCTCGTTAAGTGTG  
AAGTGTAATCCCTAGGGCTCAACCCAGGAAGTCTTTACATACTGGCGGGCTTGAGGATT  
GGAGAGGCTTGTGGAATTCCTGGTGTAGCGGTGAAATGCGTTGATATCAGGAGGAACACC  
CATGGCGAAGGCAGCAAGCTGGCCAATTTCTGACGCTGAGGCGCGAAAGCGTGGGTAGCA  
AACAGGATTAGATAACCTTG TAGTCC  
>Otu925  
CCAGCCTACGGGATGCTCCAGTGGGGAATTTTGGACAATGGGCGAAAGCCTGATCCAGCA  
ACGCCGCGTGAGGATGAAGGTCTTCGGATTGTAAACTCTTTTAGAGGGAACGAATAAA  
TTGACGGTACTCTCAGAAAAAGCCACGGCTAACTACGTGCCAGCAGCCGCGGTAATACGT  
AGGTGGCAAGCGTTACTCGGATTTACTAGGCGTAAAGCGTGTGTAGGTGGTTGAATAAGT  
CTGTAGTGAATCTCTCGGCTTAACCGGGAGGGGTCTACAGAACTATTTCGGCTTGAGTG  
TGGTAGGGGAGAACGGAATTCCTGGTGTAGCGGTGAAATGCGTAGATATCAGGAGGAACA  
CCGATGGCGAAAGCGGTTCTCTGGACCAATACTGACACTGATATACGAAAGCTAGGGGAG  
CAAACAGGATTAGAAACCCCTCGTAGTCC  
>Otu926  
CCAGCCTATGGGTGGCAGCAGTGGGGAATATTGGACAATGGGGGAAACCCTGATCCAGCC

ATGCCGCGTGAATGATGAAGGCCTTCGGGTGTGAAAATTCTTTTGGTGGGGACGATGATG  
ACGGTACCCACAGAATAAGCTCCGGCTAACTTCGTGCCAGCAGCCGCGGTAATACGAAGG  
GGGCTAGCGTTGTTTCGGAATTACTGGGCGTAAAGGGCGCGTAGGCGGCTTGATAAGTTGG  
ATGTGAAAGCCCAGGGCTCAACCCTGGAATAGCATTCAAGACTATCTCGCTTGAATTCGG  
TAGAGGTTGGTGGAATTCACAGTGTAGAGGTGAAATTCGTAGAGATTGGGAAGAATATCC  
GTGGCGAAGGCGGCCAACTGGACCGACATTGACGCTGAGGCGCGAAAGCGTGGGGAGCAA  
ACAGGATTAGAGACCCTCGTAGTCC

>Otu928

CCAGCCTACGGGGGGCTGCAGTGGGGAATCTTGCGCAATGGGCGAAAGCCTGACGCAGCA  
ACGCCGCGTGTGTGATGAAGGCTTTCGGATCGTAAAGCACTGTCGCGAGGGAAGAGAAGC  
CCTGGGTGAACAATCCAGGGATAGGACGGTACCTCGAGAGGAAGCACCGGCTAACTCTGT  
GCCAGCAGCCGCGTAATACAGAGGGTGCAGCGTTGTTTCGGAAGTATTGGGCGTAAAGC  
GCTTGTAGGCGGCAGTTTAAAGTCTCATGTGAAAGCCCTAGGCTTAACCTAGGAAGTGCAT  
GAGATACTGGACGGCTTGGATGCCGGAGAGGGTTCGCGGAATTCCTCGGTGTAGAGGTGAAA  
TTCGTAGATATCGGGAGGAACACCAGAGGCGAAGGCGGCGACCTGGACGGACATTGACGC  
TGAGACGCGAAAGCGTGGGTAGCAAACAGGATTAGAAACCCAGTAGTCC

>Otu933

CCAGCCTACGGGTGGCTCCAGTGAGGAATATTGCGCAATGGGGGAAACCCTGACGCAGCG  
ACGCCGCGTGAGTGATGAAGGCCTTCGGGTGTGAAAGCTCTGTCAGAGGGAAGAAAGGG  
GTGTTGGAATAATACCAACACCATTGACGGTACCCTCGGAGGAAGCACCGGCTAACTCC  
GTGCCAGCAGCCGCGTAATACGGAGGGTGCAAGTGTTATTCGGAATCACTGGGCGTAA  
GAGCACGTAGGCGGATGGGTAAAGTCAGATGTGAAATCCCGGGGCTTAACTTCGGAAGTGC  
ATTTGATACTGCTCGTCTTGAGTATGGTAGAGGGGATGGAATTCCTCGGTGTAGAGGTGA  
AATTCGTAGATATCGGGAGGAACACCAGAGGCGAAGGCGATCCCCTGGGCCATTACTGAC  
GCTGAGGTGCGAAAGCGTGGGGAGCAAACAGGATTAGAGACCCTTG TAGTCC

>Otu937

CCAGCCTATGGGGGGCTGCAGTAAGGAATATTGGTCAATGGGCGCAAGCCTGAACCAGCC  
ATGCCGCGTGCAAGGATGAAGGCTCTATGGGTCGTAAACTGCTTTTATACGGGAAGAAAACC  
CCTCTACGTGTAGAGGGTTGACGGTACTGTAAGAATAAGGATCGGCTAACTCCGTGCCAG  
CAGCCGCGGTAATACGGAGGATCCAAGCGTTATCCGGATTTATTGGGTTTAAAGGGTGCG  
TAGGCGGACTTGTAAGTCAGTGGTGAAAGCCCGCAGCTTAACTGCGGAAGTGCCATTGAT  
ACTGCTAGTCTTGAGTATAACTGAGGTGGGCGGAATGTGTCATGTAGCGGTGAAATGCTT  
AGATATGACACAGAACACCGATTGCGAAGGCAGCTCGCTAAACTATAACTGACGCTGAGG  
CACGAAAGTGTGGGTAGCAAACAGGATTAGAAACCCGTGTAGTCC

>Otu938

CCACGGGGTTGCAGCAGTGGGGAATATTGGACAATGGGCGCAAGCCTGATCCAGCAATGC  
CGCGTGTGTGAAGAAGGCCTTCGGGTTGTAAAGCACTTTTATCAGGAGCGAAACGCTGTC  
GATTAATACTCGGCGGAAGTACGGTACCTGAGGAATAAGCACCGGCTAACTTCGTGCCA  
GCAGCCGCGGTAATACGAAGGGTGCAAGCGTTAATCGGAATTACTGGGCGTAAAGCGTGC  
GTAGGCGGTTTGATAAGTCTGTTGTGAAATCCCCGGGCTCAACCTGGGAATGGCAATGGA  
TACTGGCAAGCTAGAGTGTGATAGAGGATGGTGGAATTCCTCGGTGTAGCGGTGAAATGCG  
TAGAGATCGGGAGGAACATCAGTGGCGAAGGCGGCCATCTGGATCAACACTGACGCTGAG  
GCACGAAAGCGTGGGGAGCAAACAGGATTAGATACCCGGGTAGTCC

>Otu939

CCAGCCTATGGGTGCAGCAGTTTGGAATTTTGGTCAATGGGGGAAACCCTGAACCAGTGA  
CGCCGCGTGGACGAAGACGCCCTTCGGGTTGTAAAGTCCTTTTGGCAGGGAAAAATTTTG  
ATTGTACCTGCAGAATAAGAGGTTGCTAACTCTGTGCCAGCAGCAGCGGTAATACAGAGA  
CCTCAAGCGTTATCCGGAATTATTGGGCGTAAAGCGTACCGATCGGTTGTTTTGATAGTC  
AGAGGTGAAATCACGAAGCTCAACTTCGTGCTCGTCCTTTGAAACTTCAAGACTAGAAGG  
GCAAAGAGGAAGCTGGAACAAACGGTGTAGTAGTGAAATGCGTTGATATCGTTTGGAACA  
CCAATAGCGAAGGCAGGCTTCTGGGTGCCACTTGACACTGCTAGGACGAAAGCGTGGGTA  
GCGAATGGGATTAGAAACCCCTGTAGTCC

>Otu940

CAGCCTATGGGTGGCTGCAGTCGAGAATCTTCCGCAATGGGCGAAAGCCTGACGGAGCGA  
CGCCGCGTGATTGATGAAGTCCTTCGGGACGTAAAGATCTTTTATGCGCGAGAAAGTAAT  
TGATAGTAGCGCATGAATAAGGGGCTCCTAACTCTGTGCCAGCAGGAGCGGTAATACAGA  
GGCCCCAAGCATTATCCGGAATCACTGGGCGTAAAGGGTGTGTAGGCGGCTATGTTAGTC  
TTTTGTGAAAGATCCCCGGCTTAAACGGGGAGACGCAGGGGAAACGGCATGGCTTCGAGG

GTATGAGAGGTAAAGGGAACCTCATGGTGTAGGGGTGAAATCCGTTGATATCATGGGGAAC  
ACCAAATGCGAAGGCACTTTACTGGCATACTCCTGACGCTGAAACACGAAAGCGTGGGAA  
TCGAATGGGATTAGATACCCGTGTAGTCC

>Otu941

CCAGCCTACGGGAGGCAGCAGTTTCGAATCATTACAAATGGGCGCAAGCCTGATGGTGCG  
ACGCCGCGTGGGGGACGAAGGTCTTCGGACTGTAAACCCCTGTCACCGGGGAAGAAACGC  
TTTGAGCTAACAGTTCAAAGCCTGACTTAACCCGGAGAGGAAGCAGTGGCTAACTCTGTG  
CCAGCAGCCGCGGTAATACAGAGACTGCAAGCGTTATTTCGGATTCACTGGGCGTAAAGGG  
TGCGCAGGCGGCTGAGTGTGTCAGGTGTGAAAGCCCGAGGCTTAACCTCGGAATTGCGCC  
TGAAACTGCTCGGCTAGAGGACTGGAGAGGGTAGCGGAATTCACGGTGTAGCAGTGAAAT  
GCGTAGATATCGTGAGGAACACCAGAGGCGAAGGCGGCTACCTGGACAGTACCTGACGCT  
CAGGCACGAAAGCGGGGGGAGCAAAAGGGATTAGATACCCTCGTAGTCC

>Otu943

CCAGCCTACGGGGTGCTCCAGTGGGGAATCTTGCGCAATGGACGAAAGTCTGACGCAGCC  
ACGCCGCGTGAGTGAAGAAGGCCTTCGGGTGTAAAGCTCTGTCGGGCGGGACGAAAATT  
TTTAGGGTTAACAGCCCTAGAAACTGACGGTACCGCCAAAGGAAGCACCGGCTAACTTCG  
TGCCAGCAGCCGCGGTAATACGAAGGGTGCAAGCGTTGCTCGGAATTATTGGGCGTAAAG  
GGTAGGTAGGTTGTCTCATTTGTCTGGGGTGAAAGCCTTGAGCTTAACCAAGAAGTGCC  
CCAGAAACGGTGAGACTAGAATCTGTGAGAGGGTCGTGGAATTCCTGGTGTAGCGGTGAA  
ATGCGTAGATATCGGGAGGAACACCAGAGGCGAAGGCGGCGACCTGGAACAGTATTGACA  
CTCAACTACGAAAGCGTGGGTAGCAAAACAGGATTAGAAACCCCTGTAGTCC

>Otu948

CCAGCCTATGGGGTGCTGTCAGTAGGGAATATTGCGCAATGGGGGAAACCCTGACGCAGCG  
ACGCCGCGTGAGTGATGAAGGCCTTAGGGTCGTAAAGCTCTGTTGAATGGGAAGAAAAAA  
ATGACGGTACCATTTCGAGAAAGGACCGGCTAACTTCGTGCCAGCAGCCGCGGTAAGACGA  
GGGGTCCTAGCGTTGTTTCGGAATCATTGGGCGTAAAGGGTGTGTAGGTTGCCATTCAAGT  
CAGTTGTGAAAGCCCCGGGCTCAACCCGGGAAGTGCTTCTGATACTGTTTGGCTTGAGTA  
CTGGAGAGGGTAGTGGAATTCCTGGTGTAGTGGTGAAATACGTAGATATCAGGAGGAATA  
CCGGTGGCGAAGGCGGCTACCTGGCCATGTACTGACACTGAAGCACGAAAGCGTGGGTAG  
CAAACAGGATTAGATACCCCCGTAGTCC

>Otu949

CCAGCCTATGGGATGCTGTCAGTGGGGAATATTGGTCAATGGGCGCAAGCCTGAACCAGCC  
ATCCCGCGTGACAGGATGAAAGCCCTATGGGTGTAAACTGCTTTTATACGGGAAAAAACT  
CTTGATTTTCGTATCGAGACTGATGGTACCGTAAGAATAAGGATCGGCTAACTCCGTGCCA  
GCAGCCGCGGTAATACGGAGGATCCAAGCGTTATCCGGATTTATTGGGTTTAAAGGGTGC  
GCAGGCGGAGTAATAAGTCAGTGGTGAAATCCTACAGCTTAAGTGTAGAACTGCCATTGA  
TACTGTTATTCTTGAGTATATTTGAAGTGGGCGGAATGTGTATGTAGCGGTGAAATGCT  
TAGATATGACACAGAACCAATCGCGAAGGCAGCTCACTAACTATAACTGACGCTCAG  
GCACGAAAGCGTGGGGATCAAACAGGATTAGAAACCCTGGTAGTCC

>Otu953

CCAGCCTACGGGTGGCTGTCAGTGGGGAATTTTGCGCAATGGGCGAAAGCCTGACGCAGCA  
ACGCCGCGTGAGGATGAAGGTCTTCGGATCGTAAACTCCTGTGATGGGGACGAAAAAA  
ATGACTGTACCCGTTGAGGAAGCCACGGCTAACTCCGTGCCAGCAGCCGCGGTAATACGG  
AGGTGGCAAGCGTTGTTTCGGAATTACTGGGCGTAAAGGGCGCGTAGGCGGTTGGGCAAGT  
CAGATGTGAAAGCCCCGGGCTTAAGTTCGGGAAGTGCATCTGAAACTGCCTTACTTGAGTT  
CTGGATGGGGTAGTGGAATTCCTAGTGTAGCGGTGAAATGCGTAGATATTGGGAGGAACA  
CCTGCGGCGAAGGCGGCTACCTGGACAGTGACTGACGCTGAGGCGCGAAAGCTAGGGGAG  
CGAACGGGATTAGAAACCCCGGTAGTCC

>Otu955

CCAGCCTCGGGGGGACAGCAGTAGGGAATTTTGCGCAATGGACGAAAGTCTGACGCAGCGA  
CGCCGCGTGAGCGATGAAGGTCTTCGGATCGTAAAGCTCTGTTGGATGGAAGAACGGTTT  
TGCATCTAATACATGCGGAACATGACCGTACCATTTCGAGTAAGCACCGGCCAACTACGTG  
CCAGCAGCCGCGGTAGTACGTAGGGTGCAAGCGTTGTTTCGGAATTACTGGGTGTAAAGGG  
AGAGTAGGCGGTTTGGAAGTTAGGAGTGAAATGCCACGCTCAACGTGGGACCTGCTTT  
TAATACTGCCGGACTTGAGTATGGGAGAGGAAGATAGAATTCAGGTGTAGCGGTGGAAT  
GCGTAGATATCTGGAAGAATACCAGTTGCGTAGGCGGTCTTCTGGCCCAATACTGACGCT  
GAGGCTCGAAAGCTAGGGGAGCAAACAGGATTAGATACCCTGGTAGTCC

>Otu956

CCAGCCTATGGGGGGCAGCAGTGGGGAATATTGGTCAATGGGCGCAAGCCTGAACCAGCC  
ATCCCGCGTGAAAGGATGAAGGCTCTAGTAGTTGTAAACTTCTTTTATACAGGAAGAAACC  
TGAGTACGTGTACCCAGTTGACGGTACTGTATGAATAAGCATCGGCTAACTCCGTGCCAG  
CAGCCGCGGTAATACGGAGGATGCAAGCGTTATCCGGATTTATTGGGTTTAAAGGGTCCG  
CAGGCGGAATTTCAAGTCAGTGGTGAAATCCTACAGCTTAACTGTAGAACTGCCATTGAT  
ACTGTTATTCTTGAGTGCGGTCGACGTGGGCGGAATATGACATGTAGCGGTGAAATGCAT  
AGATATGTCATAGAACACCAATTGCGAAGGCAGCTCACGAGACCGCAACTGACGCTCAGG  
GACGAAAGCATGGGTAGCGAACAGGATTAGATACCCCTGTAGTCC

>Otu957

CCAGCCTATGGGTGGCTGCAGTGGGGAATATTGGACAATGGGCGCAAGCCTGATCCAGCA  
ATGCCCGCGTGAGTGATGAAGGCCTTAGGGTTGTAAAGCTCTTTCGACGGGAACGATAATG  
ACGGTACCCGAAGAAGAAGCTGCGGCTAACTACGTGCCAGCAGCCGCGGTAATACGTAGG  
GTGCAAGCGTTAATCGGAATTACTGGGCGTAAAGCGTGCGCAGGCGGTTATGTAAGACAG  
ATGTGAAATGCCCGGGCTTAACCTGGGAACTGCATTTGTGACTGCATGGCTAGAATCTGG  
CAGAGGGGGGTAGAATTCCACGTGTAGCAGTGAAATGCGTAGATATGTGGAGGAATACCG  
ATGGCGAAGGCAGCCCCCTGGGCTAAGATTGACGCTCATGCACGAAAGCGTGGGGAGCAA  
ACAGGATTAGAAACCCCAGTAGTCC

>Otu959

CCAGCCTACGGGGCGCTGCAGTCGAGAATTTTTCACAATGGGCGAAAGCCTGATGGAGCG  
ACGCCGCGTGGGGGATGAATGGCTTCGGCCCGTAAACCCCTGTCATTTGCGAGCAAAGCT  
GCCGGCCTAACACGCTGGTAGTTGATCGTAGCGAAAGAGGAAGGGACGGCTAACTCTGTG  
CCAGCAGCCGCGGTAATACAGAGGTCCCAGCGTTGTTTCGGATTTACTGGGCGTAAAGGG  
TGCGTAGGTGGCTGGGTAAGTTTGATGTGAAATCTCCGGGCTCAACCCGGAATGGCATT  
GAATACTGCTTGGATAGAGGGTTGGAGAGGGGACTGGAATTCTCGGTGTAGCAGTGAAAT  
GCGTAGATATCGAGAGGAACACCAGTGGCGAAGGCGAGTCCCTGGACAACCTCTGACACT  
GAGGCACGAAAGCTAGGGGAGCAAACAGGATTAGAGACCCGAGTAGTCC

>Otu962

CCAGCCTATGGGACGCAGCAGTCGAGAATCTTCCGCAATGGACGAAAGTCTGACGGAGCG  
ACGTTACGTGAATGATGAAGCCCTTCGGGGTGTAAGTTCTTTTATATGGGAAGAAGCGC  
AAGCAGACTGTACCATATGAATAAGGGGATCCTAATTCTGTGCCAGCAGGAGCGGTAATA  
CAGAATCCCCGAGCGTTACCCGGATTTATTGGGCGTAAAGGGTCCGTAGGTGGTAAAGTA  
AGTTGAAAGTTAAAACCTCATCGGCTTAACCTTTGAGGTGCTTTCAATACTGCTATACTAG  
AGGATGTTAGGGGTGAACGGAACCGACGGAGTAGGGGTGAAATCCGTTGATATCGTCGGG  
AACACCAAAAGCGAAGGCAGTTAACTAGGACGACCCTGACACTGAGGAACGAAAGCGTGG  
GGAGCAAAAAGGATTAGAGACCCTAGTAGTCC

>Otu963

CCAGCCTATGGGTGGCACCAGTGGGGAATCTTGCGCAATGGACGAAAGTCTGACGCAGCC  
ACGCCGCGTGAGTGAAGAAGGCCTTCGGGTGTAAAGCTCTGTGAGCGGGACGAAAAAT  
CTTTAGGTGAATAGCCTAGAGATCTGACGGTACCGCTAAAGGAAGCACCGGCTAACTCCG  
TGCCAGCAGCCGCGGTAATACGGAGGGTGCAAGCGTTGCTCGGAATTATTGGGCGTAAAG  
GGTAGGTAGGTGGTCTCATTTGTCTGGGGTGAAAGCCTTGAGCTTAACTCAAGAAGTGCC  
CCAGAAACGGTGAGACTAGAGTCCTGGAGAGGGTTCGTGGAATTCCCGGTGTAGCGGTGAA  
ATGCGTAGAGATCGGGAGGAACACCAGAGGCGAAGGCGGCGACCTGGACAGGTACTGACA  
CTCAACTACGAAAGCGTGGGGAGCAAACAGGATTAGAAACCCGTGTAGTCC

>Otu964

CCAGCCTACGGGTGGCAGCAGTAAGGGATATTGCGCAATGGGCGAAAGCCTGACGCAGCA  
ACGCCGCGTGCCCCGAGGAAGGCCTTCGGGTGTAAAGGGCTTTTAGGGCTGAAGAGCAAG  
GACGGTAAGCCCGGAAGAAGTGTCGGCTAACTACGTGCCAGCAGCCGCGGTAACACGTAG  
GAGGCAAGCGTTATCCGGATTTACTGGGCGTAAAGCGCATGCAGGTGGTTCGGTAAGTTG  
GATGTGAAAGCTCCTGGCTCAACTGGGAGAGGTCGTTCAATACTACCGGACTTGAGAGCA  
GTAGAGGAAAGTGGAATTCCCGGTGTAGTGGTGAAATGCGTAGATATCGGGAGGAACACC  
AGTGGCGAAAGCGGCTTTCTGGACTGTTCTGACACTCATATGCGAAAGCTAGGGTAGCA  
AACGGGATTAGATACCCCGTAGTCC

>Otu965

CCAGCCTATGGGGGGCAGCAGTCGAGGATCTTCCGCAATGGGCGCAAGCCTGACCGAGCG  
ACGCCGCGTGTCGATGAAGGCCTTCGGGTGTAAAGCACTGTGAGGGGGAGGAAAGCC  
GCAAGGTTTGACCTATCCCTGGAGGAAGCAGGGCTAAGTTTCGTGCCAGCAGCCACGGTA  
AGACGAACCGTGCAACGTTGTTTCGGAATCACTGGGCTTAAAGGGCGCGTAGGCGGGTCT

TCAAGTCCGGGGTGAAGCCCCCAGCTCAACTGGGGAAGTGCCTTGGAGACTGAAGGTCT  
CGAGGGAGGTAGGGGTCCGTGGAACCTCGGGTGGAGCGGTGAAATGCGTTGATATCCGAA  
GGAACGCCGGTGGCGAAAGCGACGGAAGTGGATCTCTTCTGACGCTGAGGCGCGAAAGCCA  
GGGAGCAAACGGGATTAGATACCCTGGTAGTCC

>Otu966

CCAGCCTATGGGGGGCTGCAGTAAGGAATATTGGACAATGCCCCGAAGGGTGATCCAGCC  
ATGCCGCGTGCAGGATGAAGGCCCTATGGGTCGTAAACTGCTTTTGAACAAGAGAAAACC  
CTCCTACGTGTAGGAGGCTGATAGTATTGTTAGAATAAGCATCGGCTAACTTCGTGCCAG  
CAGCCGCGGTAAGACGAAGGATGCAAGCGTTATCCGGATTCATTGGGTTTAAAGGGAGCG  
TAGGCGGTCTTATAAGTCAGTGGTGAAGCTCCTCGCTTAACGAGGAAATTGCCATTGAT  
ACTGTAGGACTTGAGTACAGTTGCTGTGGGCGGAATATGACATGTAGTGGTGAATACAT  
AGAGATGTCATAGAACACCGATTGCGAAGGCAGCTCACAAAAGTGAAGTACGCTGAGG  
CTCGAAAGTGCAGGGGATCAAACAGGATTAGAAACCCTGGTAGTCC

>Otu967

CCAGCCTATGGGGTGCTGCAGTAGGGAATATTGGGCAATGGAGGCAACTCTGACCCAGCC  
ATGCCGCGTGCAGGAAGAAGGCCCTCCGGGTGTAAACTGCTTTTGAACGGGAAGAAAAG  
ACCCTGCGGGGGAAAGTGACGGTACCCTTAGAATAAGCCACGGCTAACTACGTGCCAGCA  
GCCGCGGTAATACGTAGGTGGCAAGCGTTGTCCGGATTTATTGGGTTTAAAGGGTGCGTG  
GGCGGCCGCGCAAGTCAGTAGTGAATACCGCAGCTCAACTGTGGGGGTGCCATTGATAC  
TTCGCGGCTTGAGTGGGGTCGGGGTGGCCGGAACCTACGGTGTAGCGGTGAAATGCATAG  
ATACCGTAAAGAACACCGATAGCGAAGGCAGGCCACTGGGCCCCAACTGACGCTGAGGCA  
CGAAAGCGTGGGGATCGAACAGGATTAGATACCCTCGTAGTCC

>Otu968

CCAGCCTACGGGGGGCAGCAGCAAGGAATCTTGGGCAATGGGCGAAAGCCTGACCCAGCG  
ACGCCGCGTGAGGGATGAAGGCCTTCGGGTGTAAACCTCTTTTCTCAGGGAAGAATAAT  
GACGGTACCTGAGGAATAAGTCTCGGCTAACTACGTGCCAGCAGCCGCGGTAATACGTAG  
GAGGCGAGCGTTATCCGGATTTATTGGGCGTAAAGTGGGCGTAGGTGGTCTTTCAAGTCA  
GATGTGAAATCTCCCGGCTTAACTGGGAGGGGTCTATCTGATACTGTTGGACTTGAGTACA  
GCAGGGGAAAATGGAATTCCCGGTGTAGTGGTGAATGCGTAGATATCGGGAGGAACACC  
AGAGGCGAAGGCGATTTTCCAGGCTGGAAGTACACTGAGGCCCCGAAAGCGTGGGGAGCG  
AACAGGATTAGATACCCGAGTAGTCC

>Otu970

CCAGCCTATGGGTGGCTCCAGATCGAACATGACTTCAAAGTATCCAAGAGACGGAGGCA  
GGAGGAATCTGATGGGTACCGCAGAACGTCGTCAATTTACCGCAGAGCAGAAGGTGCGAC  
ATGGGACCGAAAACCATGAAATCAATGCGATCCGCACCGGCAGCCCGCAGAGCCTACATG  
AGGCACGTGGCCACGACCGTAGACGATGTGCGCGACCGACCCCTTCTTGTGCCTTAACCGG  
CAAGAGATGTTGCACTTGCTCTGGGCGCTCAATCTCCGAGCTCGGGAATACTCCGTGAGC  
GTCAATCCTCGAGACTGCGCTTGACGGGACTGCGCTTGACCAAATGGACCAGGTATCGC  
CGCGCTCCTGAAACAATTACGCTGTTTTCGGTGGAAACCTAGATATGAGCAATCTCAGAA  
GTACCTCGCTGATCTAATAAAGCTCAGGTAGATTGATTAGATACCCCCGTAGTCC

>Otu971

CCAGCCTACGGGTGGCAGCAGTGAGGAATATTGGACAATGGGCGGAAGCCTGATCCAGCA  
ATACCGCGTGTGTGAAGAAGGCCTGAGGGTTGTAAAGCACTTTCAATGGGAAGGAATACC  
TGGTGGTTAATACCTGCCAGACTGACATTACCATAACAAGAAGCACCGGCTAACTCCGTGC  
CAGCAGCCGCGGTCTATACGGAGGGTGCAAGCGTTAATCGGAATTACTGGGCGTAAAGCGT  
GCGTAGGCGGTTCTGTTAAGTCAGATGTGAAAGCCCTGGGCTTAACCTGGGAAGTGCATTT  
GATACTGGCGGACTTGAGTTGAGTAGAGGAGAGTGAATTTAGGTGTAGCGGTGAAATG  
CGTAGAGATCTGAAGGAACACCAAGTGGCGAAGGCGGCTCTCTGGACTCAAAGTACGCTG  
AGGTACGAAAGCGTGGGTAGCAAACAGGATTAGAAACCCCCGTAGTCC

>Otu973

CCAGCCTACGGGGGGCTGCAGTGGGGAATCTTGACAATGGGCGAAAGCCTGATGCAGCA  
ACGCCGCGTGGAGGACGAATGCTTTCTGAGTTGTAAACTCCTTTCAGCAGGGACGATTGT  
GACGGTACCTGCAGAAGAAGCACCGGCCAACTACGTGCCAGCAGCCGCGGTGATACGTAG  
GGTGAAGCGTTGTCCCGATTTATTGGGCGTAAAGAGCTCGTAGGCGGTTTGATAAGTCG  
GATGTGAAATCTCCAGGCTCAACCTGGAGCTGCCATTCGATACTGTCATGACTTGAGGCC  
GGTAGGGGACCATGGAATTCCTAGTGTAGCGGTGAAATGCGCAGATATTAGGAGGAACAC  
CAGCAGCGAAGGCGGTGGTCTGGGCCGGTACTGACGCTGAGGAGCGAAAGCGTGGGGAGC  
GAACAGGATTAGATACCCTCGTAGTCC



>Otu977

CCAGCCTATGGGTGGCAGCAGTGGGGAATATTGGACAATGGGCGCAAAGCCTGGTCCAGCA  
ATGCCGCGTGTGTGAAGAAGGTCTTCGGATTGTAAAGCTCTTTCGGCAGGGAAGATGATG  
ACGGTACCTGCAGAAGCAGCTGCGGCTAACTACGTGCCAGCAGCCGCGGTAATACGTAGG  
CAGCAAGCGTTGTTTCGGAGTTACTGGGCGTAAAGGGTGCCTAGGCGGCCTTGTAAGTATG  
GTGTGAAATCTCCCGGCTTAACTGGGAGGGTGCCTATTAAGTGCAGGGCTAGAGTGCAGG  
GAGAGGAAAGTGGAATTCCTGGTGTAGCGGTGAAATGCGTAGATATCAGGAGGAACACCG  
GTGGTGTAAACGGCTTTCTGGACCGTAACTGACGCTGAGGCACGAAAGCGTGGGTAGCAA  
ACAGGATTAGAGACCCAGTAGTCC

>Otu978

CCAGCCTATGGGTGCGCTGCAGTCAAGAATATTCCTCAATGGACGAAAGTCTGAAGGAGCG  
ACGCCGCGTGACTGAAGAAGTCCTTCGGGATGTAAAGGTCTTTTCTCAGGGAAGAAATCT  
GACGGTACCTGAGGAATAAGAGGTTGCTAACTCTGTGCCAGCAGCAGCGGTAATACAGAG  
ACCTCGAGCGTTATCCGGATTGATTGGGCGTAAAGCGTGCGCAGACGGCTTTCTAAGTCT  
GCGGTCAAATTCTCTAGCTCAACTGGGGAAGTGCCTGCGGAAAGTGGAAAGCTAGAGTGC  
GAAGAGGTGACGGAATTGCCGGTGTAAAGGTAAAATGTGTTAATATCGGCAAGAACACC  
AGAGGCGAAAGCGGCTGACTGGGACGCAACTGACGTTGTTGCACGAAAGCGTGGGGAGCG  
AATGGGATTAGATACCCTAGTAGTCC

>Otu979

CCAGCCTATGGGAGGCTCCAGCGGGGAATCTTGCGCAATGGGCGAAAGCCTGACGCAGCA  
ACGCCGCGTGTGTGATGAAGGTCTTCGGATCGTAAAGCACTGTGCGAGGGACGAGAAGC  
ATTGGGTGAACAATCCAGTGATAGGACGGTACCTCGAGAGGAAGCACCGGCTAACTCTGT  
GCCAGCAGCCGCGGTAATACAGAGGTGCGAGCGTTGTTTCGGAATTATTGGGCGTAAAGC  
GCTTGTAGGCGGTCTACTAAGTCCATTGTGAAAGCCCTTGGCTCAACCAAGGAAGTGCAA  
TGGATACTGGAAGACTTGAATGCCGGAGAGGGTTCGCGGAATTCCTGGTGTAGAGGTGAAA  
TTCGTAGATATCGGGAGGAACACCAAGTGGCGAAGGCGGCGACCTGGACGGACATTGACGC  
TGAGACGCGAAAGCGTGGGGAGCAAACAGGATTAGAAACCCGAGTAGTCC

>Otu983

CCAGCCTATGGGGGGCAGCAGTGGGGAATTTTGGACAATGGGGGCAACCCTGATCCAGCC  
ATGCCGCGTGCGGGAAGAAGGCCTTCGGGTGTAAACCGCTTTTGGCAGGAACGAAACGG  
CGCGCGCAATACCGCGCGTTAATGACGGTACCTGCAGAATAAGCACCGGCTAACTACGT  
GCCAGCAGCCGCGGTAATACGTAGGGTGCAGCGTTAATCGGAATTACTGGGCGTAAAGC  
GTACGCAGGCGGCTTGTTAAGACAGGTGTGAAATCCCCGGGCTCAACCTGGGAACTGCAT  
TTGTGACTGCCAGACTCGAGTTTGTGAGAGGGGGTGGAAATTCACGTGTAGCAGTGAAA  
TGCGTAGAGATGTGGAGGAACACCGATGGCGAAGGCAGCCCCCTGGGATGAGACTGACGC  
TCATGTACGAAAGCGTGGGGAGCAAACAGGATTAGAGACCCGAGTAGTCC

>Otu984

CCAGCCTATGGGGGGCACCAGTAGGGAATATTGGTTAATGGGCGAAAGCCTGACCCAGCA  
ACGCCGCGTGTGCGATGAAGGCCTTCGGGTGCTAAAGCACTTTTATAGTGGGATGAGGAAG  
GACAGTACCACTAGAATAAGTCTCGGCTAACTACGTGCCAGCAGCCGCGGTAACACGTAG  
GAGGCAAGCGTTATCCGGATTACTGGGCGTAAAGCGCGTGTAGGTGGTTTTGTAAAGTTG  
GATGTGAAAGCTCCCGGCTTAACTGGGAGAGGTCGTTCAAACTACAAGACTTGAGAGTG  
GTAGAGGAAGGTGGAATTCCGGGTGTAGTGGTGAATGCGTAGATATCCGGAGGAACACC  
AGTGGCGAAAGCGGCCTTCTGGACCATTTCTGACACTGATACGCGAAAGCTAAGGTAGCA  
AACGGGATTAGATACCCGCGTAGTCC

>Otu988

CCAGCCTATGGGGCGCACCAGTCGAGAATCTTCCGCAATGGGCGAAAGCCTGACGGAGCG  
ACGTCGCGTGGTTGATGAAGTCTTTCGGGATGTAAAAACCTTTTATGAGCTACTAAGTTA  
TTGAAGGGCTCATGAATAAGGGGTGCTAACTCGTGCCAGCAGCAGCGGTAATACGAGT  
GCCCCGAGCGTTATCCGGAATTATTGGGCGTAAAGGATGTGTAGGCGGTCTGTAGTCT  
CATGTTAAAGCTCCCGGCTTAAACGGGAAAGTGCCTGGGAAACGGCAGAACTAGAGGATG  
TGAGAGGTATGCGGAACCTAGTGTAGGGGTGAAATCCGTTGATATTATGGGGAACACC  
AAAAGCGAAGGCAGCATACTGGCACACTCTGACGTTGAGACATGAAAGCGTGGGTAGCG  
AATGGGATTAGAGACCCCGTAGTCC

>Otu991

CCAGCCTACGGGGCGCACCAGTCGAGAATCTTCCGCAATGGGCGAAAGCCTGACGGAGCG  
ACGCCGCGTGACTGATGAAGTCCTTCGGGACGTAAAGGTCTTTTGTGAGGTAGAAAGTTA  
TTGATCGCCTCAAGAATAAGGGGTGCTAACTCGTGCCAGCAGCAGCGGTAATACGAGT

GCTCCAAGCGTTATCCGGAATTATTGGGCGTAAAGGGTGTGTAGGCGGTCTTATTAGTCT  
TTTGTAAACTCCCGGCTCAACCGGGAATCTGCAAAAGAAACGGTAAGACTTGAGGGTG  
CGAGGGGTGAATGGAAGTCATAGTGTAGGGGTGAAATCCGTTGATATTATGGGGAACACC  
AAAAGCGAAGGCAATTCCTGCGCACTTCTGACGCTGAAACACGAAAGCGTGGGTAGCG  
AATGGGATTAGAAACCCGCGAGTCC

>Otu993

CCAGCCTACGGGAGGCTGCAGTCGAGAATTTTTTCACAATGGGGGAAACCCTGATGGAGCG  
ACGCCGCGTGGGGGATGAATGGCTTCGGCCCGTAAACCCCTGTCATTTGCGAATAAACCT  
TGTTGTTTAAAGAGATGACGAGTTGACAGTAGCGAAAGAGGAAGGGACGGCTAACTCTGTG  
CCAGCAGCCGCGGTAATACAGAGGTCCCAAGCGTTGTTTCGGATTCACTGGGCGTAAAGGG  
TGCGTAGGTGGTCGGGTAAGTCTGATGTGAAATCTCGGAGCTCAACTCCGAAACTGCATT  
GGATACTATCCGGCTAGAGGATCGGAGGGGGGACTGGAATTCTCGGTGTAGCAGTGAAAT  
GCGTAGATATCGAGAGGAACACCAGTGGCGAAGGCGAGTCCCTGGACGATTCCCTGACACT  
GAGGCACGAAAGCTAGGGGAGCAAACAGGATTAGAGACCCGCGTAGTCC

>Otu994

CCAGCCTACGGGGGGGCTGCAGTAACGAATCTTCCGCAATGCACGCAAGTGTGACGGAGCG  
ACGCCGCGTGTGGGACGAAGTCCTTCGGGATGTAAACCACTGTCAGGGGTAAAGAAAGTTC  
TGATCTACCCAGAGGAAGGCACGGCTAACTCTGTGCCAGCAGCCGCGGTAAGACAGAGG  
TGCCGAGCGTTAGGCGGAATCACTGGGCTTAAAGCGTGTGTAGGCGGGTCGTTAAGTATC  
TTGTGAAATCCCCCGGCTCAACCGGGGAACTGCTGGGTATACTGGCGATCTTGAGCAATT  
CAGGGGCAGATGGAACAAGTGGTGGAGCGGTGAAATGCGTAGATATCACTTGGAACGCCA  
ATGGTGAAACAACTCGCTGGGGGTTTGCTGACGCTGAGACACGAAAGCTAGGGGAGCAA  
ACGGGATTAGATACCCCTGTAGTCC

>Otu995

CCAGCCTATGGGTGGCAGCAGTCGAGGATCTTCGGCAATGAGCGCAAGCTTGACCGAGCG  
ACGCCGCGTGAGCGATGAAGGCCTTCGGGTGTAAAGCTCTTTAGTGGGGGAGAAAAGCC  
GAAAGGTGTGATCTATCCCCAAAATAAGCACGGGCTAAGTTCGTGCCAGCAGCCGCGGTA  
AGACGAACCGTGCGAACGTTATTCGGAATCACTGGGCTTAAAGGGCGCGTAGGCGGGCTG  
TCAAGTCTGGGGTGAAATCCCACGGCTTAAACGTGGAAGTGCCTCAGATACTGACGGCCT  
CGAGGAAGGTAGGGGCATGCGGAAGTGTAGGTGGAGCGGTGAAATGCGTTGATATCTACA  
GGAAGTCCGGTGGCGAAAGCGGCGTGCTGGACCTTTTCTGACGCTGAGGCGCGAAAGCTA  
GGGAGCAAACGGGATTAGAAACCCCGGTAGTCC

>Otu996

CCAGCCTACGGGTCGCAGCAGTGGGGAATATTGGACAATGGGGGCAACCCTGATCCAGCA  
ATGCCGCGTGTGTGAAGAAGGCCTTCGGGTGTAAAGCACTTTTGTGAGGGAAGAAAAGG  
TTTGGCCCTAATACGGTGGACTGATGACGGTACCTGAAGAATAAGCACCGGCTAACTACGT  
GCCAGCAGCCGCGGTAATACGTAGGGTGCAAGCGTTAATCGGAATTACTGGGCGTAAAGC  
GTGCGCAGGCGGTTTGTAAAGACGGATGTGAAATCCCCGGGCTCAACCTGGGAACTGCAT  
TCGTGACTGGCAGGCTAGAGTATGGCAGAGGGGGGTGGAATTCACGTGTAGCAGTGAAA  
TGCGTAGAGATGTGGAGGAACACCGATGGCGAAGGCAGCCCCCTGGGCCAATACTGACGC  
TCATGCACGAAAGCGTGGGGAGCAAACAGGATTAGATAACCCCTGTAGTCC

>Otu1004

CCAGCCTATGGGTGGCACCAGTGGGGAATATTGGACAATGGGGGAAACCCTGATCCAGCC  
ATGCCGCGTGAGTGATGAAGGCCTTAGGGTTGTAAAGCTCTTTTAGCAGGGAAGATGATG  
ACGGTACCTGCAGAATAAGCACCGGCTAACTTCGTGCCAGCAGCCGCGGTAATACGAAGG  
GTGCTAGCGTTGTCCGGAATCACTGGGCGTAAAGCGCGCGTAGGCGGCTTTTCAAGTCAG  
GGGTGAAATGCCAAGGCTTAACCTTGGAAGTGCCTTTGAACTGTAAAGCTGGAGTGTGCG  
GAGGGGATAGCGGAATTCCTAATGTAGTGGTGAAATACGTAGATATTAGGAGGAACACCG  
GTGGCGAAGGCGGCTATCTGGACGACAACCTGACGCTGAGGCGCGAAAGCGTGGGGATCAA  
ACAGGATTAGAACCCTCGTAGTCC

>Otu1005

CCAGCCTACGGGGGGCAGCAGTGGGGAATTTTGGACAATGGGCGCAAGCCTGATCCAGCC  
ATGCCGCGTGAGTGGAAGAAGGCCTTCGGGTGTAAAGCTCTTTCAGCCGGAAGAAATCG  
CATCGGATAATACCTGATGTGGATGACGGTACCGGAAGAAGAAGCACCGGCTAACTACGT  
GCCAGCAGCCGCGGTAATACGTAGGGTGCGAGCGTTAATCGGAATTACTGGGCGTAAAGC  
GTGCGCAGGCGGTTGTGTAAAGACAGATGTGAAATCCCCGGGCTCAACCTGGGAACTGCGT  
TTGTGACTGCACGACTAGAGTACGGCAGAGGGAGGTGGAATTCACGTGTAGCAGTGAAA  
TGCGTAGAGATGTGGAGGAACACCGATGGCGAAGGCAGCCTCCTGGGCCAGTACTGACGC

TCATGCACGAAAAGCGTGGGGAGCAAACAGGATTAGATACCCTAGTAGTCC

>Otu1007

CCAGCCTACGGGTTCGCAGCAGTGGGGAATTTTTCGCAATGGGGGAAACCCTGACGCAGCA  
ACGCCGCGTGGAGGATGAAGTACTTCGGTACGTAAACTCCTTTTCGATCGGGACGATAATG  
ACGGTACCGGAAGAAGAAGCCCCGGCTAACTTCGTGCCAGCAGCCGCGGTAATACAGAGG  
GTGCGAGCGTTAATCGGAATTACTGGGCGTAAAGCGCACGCAGGCGGCTCGATAAATTAG  
AAGTGAAAGCCTTGGGCTTAACCTGAGAATTGCTTTTAAGACTGTTCGAGCTAGAATCCAG  
AAGAGGGTAGTGGAATTCGAGTGTAGAGGTGAAATTCGTAGATATTCGGAAGAACACCA  
GTGGCGAAGGCGACTACCTGGTCTGGCATTGACGCTCATGTGCGAAAGCGTGGGGAGCAA  
ACAGGATTAGATACCCGAGTAGTCC

>Otu1008

CCAGCCTATGGGGTGCAGCAGTCGAGGATCTTCGGCAATGGGCGCAAGCCTGACCGAGCG  
ACGCCGCGTGTGGGATGAAGGCCTTCGGGTGTAAACCACTGTCAGTGGGGAGAAAATGC  
TGGTGGGTACTCCCATCAGTTTGACCTATCCGCAGAGGAAGTGTGGGCTAAGTTTCGTGCC  
AGCAGCCGCGGTAAGACGAACCACACAAACGTTATTCGGAATCACTGGGCTTAAAGGGTG  
CGTAGGCTGTGCAGAAAGTTGGGTGTGAAATACCTCGGCTCAACCGAGGAAGTGCAGGCA  
AACTACTGTGCTCGAGGAAGACAGAGGTAAAGCGGAAGTGAAGGTGGAGCGGTGAAATGC  
GTTGATATCCTCAGGAACACCCGTTGGCGAAAGCGGCTTACTGGGTCTTTTCTGACGCTGA  
TGCACGAAAGCTAGGGGAGCAAACGGGATTAGAAACCCCAAGTAGTCC

>Otu1009

CCAGCCTACGGGGCGCTGCAGCAGTGGGGAATATTGCACAATGGGCGCAAGCCTGATGCA  
GCGACGCCGCGTGAGGGATGACGGCCTTCGGGTGTAAACCTCCTTTTCAGTACCGACGAAG  
CGTGAGTGACGGTAGGTACAGAAGAAGCACCGGCCAACTACGTGCCAGCAGCCGCGGTAA  
TACGTAGGGTGCAGCGTTGTCCGGAATTACTGGGCGTAAAGAGCTCGTAGGTGGTTTGT  
CGCGTTGTTTCGTGAAAACCTCACAGCTCAACTGTGGGCGTGCGGGCGATACGGGCAGACTG  
GAGTACTGCAGGGGAGACTGGAATTCCTGGTGTAGCGGTGGAATGCGCAGATATCAGGAG  
GAACACCGGTGGCGAAGGCGGGTCTCTGGGCGAGTAAGTACGCTGAGGAGCGAAAGCGTG  
GGGAGCGAACAGGATTAGAAACCCGAGTAGTCC

>Otu1010

CCAGCCTATGGGTGGCACCAGCAAGGAATATTGCGCAATGGGCGAAAGCCTGACGCAGCG  
ACGCCGCGTGAGGGAAGAAGGCCTTCGGGTGTAACCTCCTTTTCTTGGGGAAGAATAAT  
GACGGTACCCAGGGAATAAGTCACGGCTAACTACGTGCCAGCAGCCGCGGTAATACGTAG  
GCGGCGAGCATTATCCGGATTTATTGGGCGTAAAGCGGGTGTAGGTGGTTTTTCAAGTCA  
GATGTGAAATTTCTCGGCTTAACCGGGAAGAGTCATTTGAGACTGTTAGACTTGAGGGCA  
GGAGAAGGAGATGGAATTCCTGGTGTAGTGGTGAATGCGTAGATATCGGGAGGAACACC  
AGTGGCGAAAGCGGTCTCCCGCCTGTTCTGACACTGAGGCCCTAAAGCGTGGGGAGCA  
AACAGGATTAGATACCCTTGTAGTCC

>Otu1011

CCAGCCTATGGGTTCGCAGCAGTGGGGAATATTGGACAATGGGGGCAACCCTGATCCAGCC  
ATGCCGCGTGAAATGATGAAGGCCTTCGGGTGTAAAGTCTTTTGACAGGGACGATGATG  
ACGGTACCTGTAGAATAAGCTCCGGCTAACTTCGTGCCAGCAGCCGCGGTAATACGAAGG  
GAGCTAGCGTTGTTTCGGAATTACTGGGCGTAAAGGGCGCGTAGGCGGCTTGGCAAGTTGG  
GTGTGAGAGCCCAGGGCTCAACCCTGGAATTGCACTCAAGACTGCCTTGCTCGAATTAGG  
TAGAGGTTGGCGGAATTCACAGTGTAGAGGTGAAATTCGTAGATATTGGGAAGAACACCC  
GTGGCGAAGGCGGCCAACTGGACCTATATTGACGCTGAGGCGCGAAAGCGTGGGGAGCAA  
ACAGGATTAGATACCCGTGTAGTCC

>Otu1012

CCAGCCTATGGGTGGCAGCAGTGGGGAATATTGGACAATGGGCGAAAGCCTGATCCAGCA  
ATGCCGCGTGATGAAGAAGGTCTTCGGATTGTAAAGTCTTTTCGGCGGGGACGATGATG  
ACGGTACCCGCGAGAAGAAGCCCCGGCTAACTTCGTGCCAGCAGCCGCGGTAATACGAAGG  
GGGCTAGCGTTGCTCGGAATGACTGGGCGTAAAGGGCGCGTAGGCGGTGCGGATAGTCAG  
ATGTGAAATTCCTGGGCTTAACCTGGGGACTGCATTTGATACGTCCGCGCTTGAGTGTGG  
AAGAGGGTCGTGGAATTCACAGTGTAGAGGTGAAATTCGTAGATATTGGGAAGAACACCC  
GTGGCGAAGGCGGCCAACTGGTCCATAACTGACGCTGAGGCGCGAAAGCGTGGGGAGCAA  
ACAGGATTAGAAACCCCGTTAGTCC

>Otu1015

CCAGCCTACGGGGGGCTCCAGTGGGGAATATTGGACAATGGGCGAAAGCCTGATCCAGCC  
ATGCCGCGTGTGTGAAGAAGGTCTTCGGATTGTAAAGCACTTTAAGTTGGGAGGAAGGGT

TGTAGATTAATACTCTGCAATTTTGACGTTACCGACAGAATAAGCACCGGCTAACTCTGT  
GCCAGCAGCCGCGGTAATACAGAGGGTGCAAGCGTTAATCGGAATTACTGGGCGTAAAGC  
GCGCGTAGGTGGTTTGTTAAGTTGGATGTGAAATCCCCGGGCTCAACCTGGGAAGTGCAT  
CCAAAAGTGGCAAGCTAGAGTATGGTAGAGGGTGGTGGAAATTTCTGTGTAGCGGTGAAA  
TGCGTAGATATAGGAAGGAACACCAGTGGCGAAGGCGACCACCTGGATTGATACTGACAC  
TGAGGTGCGAAAGCGTGGGGAGCAAACAGGATTAGATAACCTCGTAGTCC

>Otu1016

CCAGCCTACGGGAGGCAGCAGTAGGGAATATTGGACAATGAGCGAAAGCTTGATCCAGCA  
ATATTAAATTAGTGAAGAAGACTGATTTTGTGTAAAGCTTTTTTCGTTAAAAAGGATAAT  
GACGTTATTTAAAGGAAGAAGTCCTGGCCAATGCCGTGCCAGCAGCCGCGGAAAAACGGT  
AGGGGCAAGTGTATCCATATTGAATGGGTGTAAAGGGTGCGTAGATCGTTAAATTGGGT  
ATTAAAAGTTTAATAGGCATATTAATATTATGGGTAATTTTAAATAAGATAACTTGAGTT  
AATTTTAGGTAAAGAGAATTCTTAGTGTAATAAATAAATTTTACAATATTAAGAGGAATA  
TCGGGAGCGAAGGCGCTTTTCTGGAATTAAACTGACGTTGAGGCACGAAAGCATAGGGAT  
CAAATGGGATTAGATAACCCCGTAGTCC

>Otu1017

CCAGCCTATGGGGGGCTGCAGTGGGGAATATTGGACAATGGGCGCAAGCCTGATCCAGCC  
ATGCCGCGTGAGTGATGAAGGCCCTAGGGTTGTAAAGCTTTTTGTGCGGGAAGATAATG  
ACGGTACCGCAAGAATAAGCCCCGGCTAACTTCGTGCCAGCAGCCGCGGTAATACGAAGG  
GGGCTAGCGTTGCTCGGAATCACTGGGCGTAAAGGGTGCGTAGGCGGTTTGGTAAGTCTT  
TTGTGAAATCTATGGGCTCAACTCATAGACTGCAAGGGAACTGCCGGGCTTGAGTGTTG  
GAGAGGTGAGTGGAATTCCTGGTGTAGCGGTGAAATGCGTAGATATCGGGAGGAACACCT  
GTGGCGAAAGCGGCTCACTGGACCACAACCTGACGCTGATGCACGAAAGCGTGGGGAGCAA  
ACAGGATTAGAAACCCCTAGTAGTCC

>Otu1018

CCAGCCTATGGGGCGCTGCAGTAGGGAATATTGGGCAATGGAGGCAACTCTGACCCAGCC  
ATACCGCGTGCAAGGATGAAGGCCCTCTGGGTTGTAAACTGCTTTTATCAGGGAAGAAACG  
CTAGGATTTATCTTAGCCTGACGGTACCTGAGGAATAAGCACCGGCTAACTCCGTGCCAG  
CAGCCGCGGTAATACGGAGGGTGCAAGCGTTATCCGGATTTACTGGGTTTAAAGGGTGC  
TAGGCGGATTGTTAAGTCAGTGGTGAAAGATTTCGAGCTCAACTCGGAAACTGCCATTGAT  
ACTGATGATCTCGAATACAGTTGAGGTAGGCGGAATATTACATGTAGCGGTGAAATGCTT  
AGATATGTAATAGAACACCGATTGCGAAGGCAGCTTGCTAAACTGTTATTGACGCTGAGG  
CACGAAAGCGTGGGGATCAAACAGGATTAGAAACCCGTGTAGTCC

>Otu1020

CCAGCCTATGGGGTGCGAGCAGTAAGGAATATTGGTCAATGGACGCAAGTCTGAACCAGCC  
ATGCCGCGTGAAAGGATGAAGGCCCTCTGGGTTGTAAACTTCTTTTATCTGGGACGAAACA  
CTGTTTTTCTAAACAGCTTGACGGTACCAGAGGAATAAGCACCGGCTAACTCCGTGCCAG  
CAGCCGCGGTAATACGGAGGGTGCAAGCGTTATCCGGATTCAGTGGGTTTAAAGGGTGC  
TAGGCGGGTATGTAAGTCCGTGGTGAAATCCTGCAGCTTAAGTGCAGAACTGCCGTGGAT  
ACTATATATCTTGAATGTTGTTGAGGTGAGTGGAATATGTCATGTAGCGGTGAAATGCTT  
AGAGATGACATAGAACACCGATTGCGAAGGCAGCTCGCTAAACAAATATTGACGCTGAGG  
CACGAAAGCGTGGGTAGCAAACAGGATTAGATAACCTCGTAGTCC

>Otu1024

CCAGCCTATGGGAGGCTGCAGTGGGGAATTTTGCGCAATGGGGGAAACCCTGACGCAGCA  
ACGCCGCGTGAGGATGAAGTACTTCGGTACGTAAACTCCTTTTCGATCGGGACGATAATG  
ACGGTACCGGAAGAAGAAGCCCCGGCTAACTTCGTGCCAGCAGCCGCGGTAATACGAAGG  
GGGCTAGCGTTGTTCCGAATTACTGGGCGTAAAGGGTGCGTAGGCGGGTCTTTAAGTCAG  
GGGTGAAATCCTGGAGCTCAACTCCAGAACTGCCTTTGATACTGAGGATCTTGAGTACGG  
GAGAGGTGAGTGGAAGTGCAGGTGTAGAGGTGAAATTCGTAGATATTTCGAAGAACACCA  
GTGGCGAAGGCGGCTCACTGGCCCGTTACTGACGCTGAGGCACGAAAGCGTGGGGAGCAA  
ACAGGATTAGATAACCCGCGTAGTCA

>Otu1025

CCAGCCTACGGGTTGCTCCAGGCGAGCGAACTCCACAATGCGCGCAAGCGTGATGGGGCA  
ATTCGAAGTGCTATCTCTGATAAAGGTAGCTGTGGCGCGGCCTAAGGAGTCGCGCAAGAA  
AGGTGAGGGCAAGGCTGGTGCCAGCAGCCGCGGTAAAACAGCTCATCAAGCGCTCAGGA  
CGATTATTGAGCTTAAAGCATTCGTAGCGGGCCCTCCAAGTCCCCGGTTAAATGCCAGTG  
CCTAACATTGGACCTGCCGGGGATACTATTGGGCTTGGGAGTGGGAGACGCTGCGAGTAT  
GGTCGGGGTACCGGTGAAATGGGATAATCCCGACTAGACTACCGGTGGCGAAGGCGAGCA

GCGAGAACACGTCCGACCGTGATGGATGAAAGCGTGGGGAGCGAACCGGATTAGAGACCC  
CAGTAGTCC  
>Otu1026  
CCAGCCTACGGGTGGCAGCAGTAAGGAATATTGGTCAATGGGCGCAAGCCTGAACCAGCC  
ATGCCGCGTGAGGGATGAAGGTCTTCGGATTGTAAACCTCTGTCACTGGGGAAGAAACGC  
TTCAGGTTAATAGCCTGAAGCCTGACTTAACCCGGAGAGGAAGCAGTGGCTAACTCTGTG  
CCAGCAGCCGCGGTAATACAGAGACTGCAAGCGTTATTTCGGATTCACTGGGCGTAAAGGG  
TGCGCAGGTGGCCAAGTGTGTGAGGCGTGAAAGCCCGGAGCTCAACTCCGGAATTGCGCC  
TCAAACCTACATGGCTAGAGCATTGGAGAGGGGAGCAGAATTCACGGTGTAGCAGTGAAAT  
GCGTAGATATCGTGAGGAATACCAGAGGCGAAGGCGGCTCCCTGGACAATAGCTGACACT  
CAGGCACGAAAGCGTGGGGAGCAAAAGGGATTAGATACCCCCGTAGTCC  
>Otu1031  
CCAGCCTACGGGTTGCTGCAGCCAAGAACATTTGGCAATGGGCGAAAGCCTGACCATGCG  
ACGCCGCGTGTTGATGAAGTCCTTCGGGACGTAAAAACCTTTTGCGCGTGAGGAAGTAA  
TTGACGTTAGCGCGCAATAAGGGGCTCCTAACTCTGTGCCAGCAGGAGCGGTAATACAG  
AGGCCCCGAGCATTATCCGGAATCACTGGGCGTAAAGGGTGTGTAGGCGGCGATATTAGT  
CTTTTGTTAAAGTCTTTGGGCTTAACCCAGAGAATGCAGGAGAAACGGTATCGCTTTGAG  
GACGCGAGAGGTAAGGGGAACCTCATGGTGTAGGGGTGAAATCCGTTGATATCATGGGGAA  
CACCAAATGCGAAGGCACCTTACTGGCGCGCTCCTGACGCTGAAACACGAAAGCGTGGGT  
AGCGAACGGGATTAGATACCTTGGTAGTCC  
>Otu1034  
CCAGCCTACGGGATGCTCCAGTAACGAATCTTCGCAATGCACGAAAGTGTGACGGAGCG  
ACGCCGCGTGTTGGGACGAAGCCCTTCGGGGTGTAACCCTGTGTCAGAGGATAGAAAGTTC  
TGATCATCCTCAGAGGAAGGCACGGCTAACTCTGTGCCAGCAGCCGCGGTAAGACAGAGG  
TGCCAAGCGTTAGGCGGAATCACTGGGCTTAAAGCGTGTGTAGGCGGAATCGTAAGTATC  
TTGTGAAATCCCACGGCTCAACCGTGGAACCTGCTTGATATACTGCGATTCTTGAGCTGCC  
TAGGGGCGAGTGGAACAAATGGTGGAGCGGTGAAATGCGTAGATATCATTTGGAACGCCA  
ATGGTGAAACAACCTCGCTGGGGGCGATGCTGACGCTGAGACACGAAAGCCAGGGGAGCAA  
ACGGGATTAGAAACCCGTGTAGTCC  
>Otu1037  
CCAGCCTATGGGAGGCAGCAGTAAGGAATTTTGGGCAATGAGGTAACCCTTGACCCGGCG  
AGAATGCGTGATGATGAATGCGGTGAGTTTCTGTAAAGTGCTTTACGGAACGAAGATA  
CTGACTGTAGTTCTTAGAAGAAGCACCGGCTAACTCCGTGCCAGCAGCTGCGGTAAGACG  
GAGGGTGCGGGCCTTATTTCATTATGATTGGGTGTAAAGGGTGCGTAGGTGGCTACTAACG  
ACACTGATAGAAATTGCAGAGAGTTCCTATGCAGTTATCAGTGAACCTCGAACGTACGCTA  
GAGTTGGGTAAATGGATCATGGCAAAATCTCACGTAAAGGTTGAATTTTCAGAGATGAGAT  
TGAACACCGGCAGGCGAAGGCGCGTCTTCTGTCCCACTGACACTCAGGCACGGAAGCTA  
CGGGAGCAAACCGGATTAGAAACCCGCGTAGTCC  
>Otu1038  
CCAGCCTATGGGGGGCTCCAGTAAGGGATATTGCGCAATGGGCGAAAGCCTGATGCAGCA  
ACGCCGCGTGAGGAAGAAGGCCTTCGGGTCGTAAACTCCTTTTCTCACTGACGAGGAAG  
GACGGTAGGTGAGGAATAAGTCACGGCTAACTACGTGCCAGCAGCCGCGGTAACACGTAG  
GTGGCAAGCGTTATCCGGATTTACTGGGCGTAAAGGGTGTGCAGGCGGGCGGTCAAGTGG  
TGTATGAAATATCCCGGCTCAACCGGGAAGGGTTATGCCAGACTGACCGTCTTGAGTGCG  
AGAGAGGGGCGTGGAATTCCGGGTGTAGTGGTGAAATGCGTAGAGATCCGGAGGAACCCC  
AGAGGCGAAGGCGGCGCCCTGGCTCGCAACTGACGCCCATACACGACAGCATGGGGAGCG  
AACGGGATTAGAAACCCCTAGTAGTCC  
>Otu1040  
CCAGCCTACGGGGTGCTGCAGTGAGGAATTTTCCACAATGGACGCAAGTCTGATGGAGCA  
ATGCTACATGAAGGAAGAAGGTCCTTTGGATTGTAAACTTCTGTTTCATCAGGAAGAAAAA  
AGTAAGCGAAAGTTTGCTCTTGACGGTACTGATGTAGAAAGCCACGACTAACTATGTGCC  
AGCAGTCGCGGTAAGACATAGGTGGCGAACGTTATCCGGATTTATTGGGCGTAAAGGATG  
CGTAGATGTTATTATAAGTTATTAGTAGAAAATAGAAGCTCAACTTCTGGCGGCTAATA  
ATACTATAATAATTGAGGGCAGAGGAGGTGCACGGAATTCTGTGTGGAGCGGTGAAATGC  
TTAGATATACAGAGGAACACCAAAATAGGCGAAGGCAGTTAACTATTCTGTTTCTGACAT  
TGAGGCATGAAAGCGTGGGGAGCAAAACGGATTAGAAACCCGAGTAGTCC  
>Otu1042  
CCAGCCTATGGGGGGCTCCAGTCGAGGATCTTTCGCAATGGGCGCAAGCCTGACGAAGCG

ACGCTGCGTGAGCGATGAAGGCCTTCGGGTCGTAAAGCTCTTTTCGCGCAAGAACAAGGAA  
AGGATGTGAACAACATTTCAGACTTGAGGGTACTGCGTAAAGAAGCACCGGCTAACTCCGT  
GCCAGCAGCTGCGGTAATACGGAGAGTGCAAGCATTAAATCGGAATTATTGGGCGTAAAGG  
GCGCGTAGGCTGAAGGATAAGTCAGATGTGAAATTCGAAGCTCAACTTCGGAGCTGCAT  
TTGAAACTATCTTTCTAGAGGATTGACGGAGAAAACGGAATTCACGTGTAGCGGTGAAA  
TGCGTAGATATGTGGAAGAACACCTGTGGCGAAAGCGGTTTTCTAGTTTATACCTGACGC  
TGAGGCGCGAGAGCAAGGGGAGCAAACAGGATTAGATAACCCGGGTAGTCC

>Otu1043

CCAGCCTACGGGGCGCACCAAGTCAAGAATCTTCCACAATGGACGAAAGTCTGATGGAGCG  
ACGCCGCGTGATTGATGAAGTGGTTCGCCACGTAAAGATCTTTTATGAGGGAAGAAGTAT  
ATTGACGGTACCTCATGAATAAGGGGCTCCTAACTCTGTGCCAGCAGGAGCGGTAATACA  
GAGGCCCGGAGCGTTATCCGGAATTATTGGGCGTAAAGGGTGTGTAGGTGGCATTGTTAG  
TCGTTTTGTGAAATCCCGGGGCTTAACCTCGGAAACGCGAACGAAACGGCAAAGCTTGAGT  
ATGTGAGAGGTAAAGCGGAACCTCATGGTGTAGGGGTGAAATCCGTTGATATCATGGGGAAC  
ACCAAAGCGAAGGCAGCTTACTGGCACATTACTGACACTGAAACACGAAAGCGTGGGGA  
TCAAACAGGATTAGATAACCTCGTAGTCC

>Otu1044

CCAGCCTACGGGGTGCTGCAGTCGAGAATCTTTCGCAATGGGCGAAAGCCTGACGAAGCG  
ACGCTGTGTGAGCGAAGAAGGCCTTCGGGTGTAAAGCTCTTTCGCTAGGGAACAAGAAA  
GTCCGATTAATAATCCGATAATTTGATGGTACTTGGTAAAGAAGCACCGGCTAACTCCGT  
GCCAGCAGCTGCGGTAATACGGAGGGTGCAAGCATTGATCGGAATTACTGGGCGTAAAGG  
GCGCGTAGGCGGTTAGGAAAGTCAGATGTGAAATTCGGGGCTCAACCCCGGAGCTGCAT  
TTGAAACTTCCAGACTAGAGTTCAGTTAGGGAAAACAGAATTCACGTGTAGCGGTGAAA  
TGCGTAGATATGTGGAAGAATACCGGTGGTGAAGACGGTTCTCTGGGCTGATACTGACGC  
TGAGGCGCGAAAGCAAGGGGAGCAAACAGGATTAGAAACCCCGTAGTCC

>Otu1045

CCAGCCTATGGGGCGCACCAAGTGGGGAATATTCCGCAATGGGCGAAAGCCTGACGGAGCG  
ACGCCGCGTGATGATGAAGGCCTTCGGGTGTAAATCCTGTAGAGGGGGAAGAAGGGT  
GGCGTAAGCCATTTGACAGTACTCCTAAAGTAAGCTACGGCAAACCTCTGTGCCAGCAGCC  
GCGGTAATACAGAGGTAGCTAGCGTTGTTTCGGAATGACTGGGTGTAAAGCGCGTGTAGGC  
GGTTTTGTAAAGTTGAATGTGAAATCCCTTGGCTCAACCAAGGAACGGCATTCAAACTGC  
ATTACTTGAGTGCGGAAGAGGAAAGTGAATTTCTGGTGTAGCGGTGAAATGCGTAGATA  
TCAGAAGGAACACCGGTGGCGAAGGCGACTTTCTGGTCCGCAACTGACGCTGAGACGCGA  
AAGCTAGGGGAGCAAACAGGATTAGATAACCCGTGTAGTCC

>Otu1047

CCAGCCTATGGGTCGCTGCAGTGAGGAATCTTGCGCAATGGGCGAAAGCCTGACGCAGCA  
ACGCCGCGTGAGTGAGGAAGGCCTTCTGGGTGTAAACCACTTTTCAGCAGGGACGATTGT  
GACGGTACCTGCAGAAGAAGCCCCGGCCAACTACGTGCCAGCAGCCGCGGTAATACGTAG  
GGGCGAGCGTTGTCCGGAATTATTGGGCGTAAAGAGCTCGTGGGCGGCTTGGCAAGTCA  
CGTGTGAAATCTCCAGGCTCAACCTGGTGTATGCCACGTGATACTGCCATGGCTTGAGTCC  
GGTAGGGGACCATGGAATTCCTGGTGTAGCGGTGAAATGCGCAGATATCAGGAGGAACAC  
CAGTGGCGAAGGCGGTGGTCTGGGCCGGTACTGACGCTGAGGAGCGAAAGCGTGGGGAGC  
GAACAGGATTAGAGACCCTCGTAGTCC

>Otu1048

CCAGCCTACGGGATGCTGCAGTGGGGAATTTTTCGCAATGGGGGAAACCCTGACGCAGCA  
ACGCCGCGTGAGTGATGAAGGCTTTTCGGGTGTAAAGCTCTGTGAGTAGGGAAGAAATGG  
GAACGGTTAATACCCGTTTTCTTGACGGTACCTACAAAGGAAGCACCGGCTAACTCCGT  
GCCAGCAGCCGCGGTAATACGGAGGGTGCAAGCGTTGTTTCGGATTTATTGGGCGTAAAGC  
GCGTGTAGGCGGTTTTTTAAGTCTGATGTGAAAGCCCCGGGCTCAACCCGGGAAGTGCAT  
TGGATACTGGAAGACTTGAATACGGGAGAGGGTAGTGGAATTCCTAGTGTAGGAGTGAAA  
TCCGTAGATATCAGGAGGAACACCGGTGGCGAAGGCGGCTGCCTGGACCGATATTGACGC  
TGAGACGCGAAAGCGTGGGGAGCAAACAGGATTAGAAACCCCTGTAGTCC

>Otu1051

CCAGCCTATGGGGTGCTGCAGTAAGGAATATTGGTCAATGGGCGAAAGCCTGAACCAGCC  
ATGCCGCGTGAGGATGAAGGTCCTCTGGATTGTAAACTTCTTTTATCTGGGACGAAAAA  
AGGGAATTCTTTCTCACTTGACGGTACCAGATGAATAAGCACCGGCTAACTCCGTGCCAG  
CAGCCGCGGTAATACGGAGGGTGCAAGCGTTATCCGGATTCAGTGGGTTTTAAAGGGTGGC  
TAGGTGGGCAGGTAAAGTCAGTGGTGAATCTCTGGGCTTAACCCAGAACTGCCGTTGAT

ACTATCTGTCTTGAATGTAGTGGAGGTGAGCGGAATATGTCATGTAGCGGTGAAATGCTT  
AGATATGACATAGAACATCTATTGCGAAGGCAGCTCGCTACACTATTATTGACACTGAGG  
CACGAAAGCGTGGGGATCAAACAGGATTAGATACCCTTGTAGTCC

>Otu1053

CCAGCCTACGGGGGGCAGCAGTGGGGAATATTGGGCAATGGGCGAAAGCCTGACCCAGCA  
ACGCCGCGTGAAGGAAGAAGGCTTTTCGGGTGTAAACTTCTTTGACGAGGGACGAAAAAA  
ATGACGGTACCTCGAAAACAAGCCACGGCTAACTACGTGCCAGCAGCCGCGGTAATACGT  
AGGTGGCAAGCGTTATCCGGATTTACTGGGTGTAAAGGGCGCGTAGGCGGGATTGCAAGT  
CAGATGTGAAATGCGGGGACTTAACCTCCGAAGTGCATTTGAAACTGTGATTCTTGAGTA  
TCGGAGAGGCAGGCGGAATTCCTAGTGTAGCGGTGAAATGCGTAGATATTAGGAGGAACA  
CCAGTGGCGAAGGCGGCCTGCTGGACGACAACTGACGCTGAGGCACGAAAGCTGGGGGAG  
CAAACCGGATTAGATACCCAGTAGTCC

>Otu1054

CCAGCCTACGGGTTCGACACCAGTGGGGAATTTTACACAATGGGCGAAAGCCTGATGTAGCG  
ACACCGCGTGAGCGAAGAAGCCCTTTGGGGTGTAAAGCTCTGTCAACAGGGACGAAAAAA  
ATGACGGTACCTGTGGAGGAAGCATCGGCTAACTACGTGCCAGCAGCCGCGGTAAGACGT  
AGGATGCGAGCGTTGTCCGGATTTATTGGGCGTAAAGAGTTCGTAGGCGGTTTCGTTAAGT  
CTGATGTAAAAGGCACGGGCTCAACCCGTGTATCGCATTAGATACTGGCGGACTAGAGTG  
CAGTAGAGGCAAGCGGAATTCCAGTGTAGCGGTGAAATGCGTAGATATTGGGAAGAACA  
CCGGTGGCGCAAGCGGCTTGCTGGGCTGTAACTGACGCTGAGGAACGAAAGCTAGGGTAG  
CGAATGGGATTAGATACCCGCGTAGTCC

>Otu1055

CCAGCCTACGGGGGGCAGCAGTGGGGAATCTTGCGCAATGGGCGAAAGCCTGACGCAGCA  
ACGCCGCGTGTGTGATGAAGGCTTTCGGATCGTAAAGCACTGTTCGCGAGGGACGAGAAGC  
CGCTTACAAATAGTGAGTGGATAGGACGGTACCTCGAGAGGAAGCACCGGCTAACTCTGT  
GCCAGCAGCCGCGGTAATACAGAGGGTTCGAGCGTTGTTTCGGAATTATTGGGCGTAAAGC  
GCTTGTAGGCGGCACTATAAGTCCACTGTGAAAGCCCTTGGCTCAACCAAGGAAGAGCAG  
TGGATACTGTAGAGCTTGAATGCCGGAGAGGGTCGCGGAATTCCCGGTGTAGAGGTGAAA  
TTCGTAGATATCGGGAGGAACACCAGTGGCGAAGGCGGCGACCTGGACGGACATTGACGC  
TGAGACGCGAAAGCGTGGGGAGCAAACAGGATTAGATACCCGCGTAGTCC

>Otu1057

CCAGCCTATGGGTTCGCTGCAGTGGGGAATATTGGACAATGGGGGCAACCCTGATCCAGCG  
ACGCCGCGTGTGTGAAGAAGGCCTGCGGGTGTAAAGCACTTTTAGTGGGGACAAAAGGC  
TACGGACTAATACTCTGTGGTCTTGATTTAACCCAAAGAAAAAGCACCGGCTAACTCTGT  
GCCAGCAGCCGCGGTAATACAGAGGGTTCGAGCGTTAATCGGAATTACTGGGCGTAAAGC  
GTGCGTAGACGGTTCTGTAAGTCGGATGTGAAATCCCCGGGCTCAACCTGGGAATTGCAT  
TCGAAACTGCAAAGCTTGGGTGCGGAAGAGGGAAGCGGAATTTCCGGTGTAGCGGTGAAA  
TGCGTAGATATCGGAAGGAACACCAGTGGCGAAGGCGACTTCCTGGTCAATACTGACGT  
TCATGTGCGAAAGCGTGGGGAGCAAACAGGATTAGATACCCTTGTAGTCC

>Otu1058

CCAGCCTATGGGTGGCTCCAGTGAGGGATTTTGCACAATGGAGGAAACTCTGATGCAGCG  
ACGCCGCGTGCGGGACGAAGCCCTTTCGGGGTGTAAACCGCTGTCAGTGGAGAAGAGTAGG  
GACGGTACCCACTGAGGAAGCATCGGCTAACTACGTGCCAGCAGCCGCGGTAAGACGTAG  
GGTGCAAGCGTTGTCCGGAATCACTGGGCGTAAAGAGCTCGTAGGCGGGGTCTTGCGTCG  
TGGAGTAAATTTTCTGCTTAACGGAGAAATCTTCCGCGATACGGGGACTCTTGAGGACA  
GGAGAGGAAAGCGGAATTCGAGTGTAGCGGTGAAATGCGTAGATATTCGGAGGAACACC  
GGTGGCGAAGGCGGCTTTCTGGCCTGATTCTGACGCTGAGGAGCGAAAGCCAGGGTAGCG  
AACGGGATTAGAAACCCAGTAGTCC

>Otu1060

CCAGCCTATGGGTGGCAGCAGTCAAGAACTTCCACAATGGACGAAAGTCTGATGGAGCG  
ACGCCGCGTGGTTGATGAAGTCCTTCGGGACGTAAAGACCTTTTATGAGGGAGAAAGTAA  
TTGATGTTACCTCATGGATAAGGGGCTCCTAACTCTGTGCCAGCAGGAGCGGTAATACAG  
AGGCCCCAAGCATTATCCGGAATCACTGGGCGTAAAGGGTGTGTAGGCGGTCGTATTAGT  
CTTTTGTTAAAGTTCTGGGGCTTACCCTCGGAAGTGCAAGGGAAACGGTACGACTAAGAG  
GATGCGAGAGGTAAAGGGAACTCATGGTGTAGGGGTGAGATCCGTTGATATCATGGGGAA  
CACCAAATGCGAAGGCACCTTTACTGGCGCACTCCTGACGCTGAAACACGAAAGCGTGGGA  
ATCGAACGGGATTAGAGACCCAGTAGTCC

>Otu1062

CCAGCCTACGGGGGGCAGCAGTGGGGAATATTGCGCAATGGGCGAAAGCCTGACGCAGCG  
ACGCCGCGTGGGGGATGAAGGCCTTCGGGTGTAAACCTCTTTCAGCGCCGAAGAAGCGA  
AAGTGACGGTAGGCGCAGAAGAAGCACCGGCTAACTACGTGCCAGCAGCCGCGGTAATAC  
GTAGGGTGCAAGCGTTGTCCGGAATTATTGGGCGTAAAGAGCTCGTAGGCGGTTTGTTCGC  
GTCTGCTGTGAAAACCTCGGGGCTTAACTCCGGGCTGCAGTGGGTACGGGCAGACTAGAG  
TGCGGTAGGGGAGACTGGAATTCCTGGTGCAGCGGTGAAATGCGCAGATATCAGGAGGAA  
CACCGGTGGCGAAGGCGGGTCTCTGGGCCGTAAGTACGCTGAGGAGCGAAAGCGTGGGG  
AGCGAACAGGATTAGAAACCCGAGTAGTCC

>Otu1064

CCAGCCTACGGGGTGCACCAGTGGGGAATCTTTCGCGCAATGGACGAAAGTCTGACGCAGCG  
ACGCCGCGTGGGTGATGAAGGCCTTCGGGTGTAAAGCCCTGTGGGGCGGGACGAATTAG  
TAGAAGCCAACATCTTCTATGATGACGGTACCGCCTTAGCAAGCACCGGCTAACTCTGTG  
CCAGCAGCCGCGGTAAGACAGAGGGTGCAAACGTTGTTTCGGAATTACTGGGCGTAAAGCG  
TGTGTAGGCGGTCATGTAGGTCGGATGTGAAAGCCCCAGGCTCAACCTGGGAAGTGCACC  
CGAAACCGCACGACTTGAGTATCGGAGAGGTTGGTGGAAATCTCGGTGTAGAGGTGAAAT  
TCGTAGATATCGAGAGGAACACCGGCGGCGAAGGCGGCCAACTGGACGAATACTGACGCC  
GAGACACGAAAGCGTGGGGAGCAAACAGGATTAGATACCCGTGTAGTCC

>Otu1068

CCAGCCTATGGGGTGCTCCAGTCGAGAATCTTTTGCAATGCTCGAAAGAGTGACAATGCG  
ACGCCGCGTGTGCGATGAAGGTCTTCGGATCGTAAGGCACTGTCAGCCGGGAGGAAGGTC  
TTTCCCTTTAATAAAGGGGAAGGTTTGACAGTACCGGCAGAGGAAGCCACGGCTAACTCC  
ATGCCAGCAGCCGCGGTAATACGGAGGTGGCAAGCGTTACTCGGATTGATTGGGTGTAA  
GGGCGTGTAGGTGGTGAATTAAGTCGGGTGTGAAATCCCTTGGCTCAACCAAGGAACTGC  
ACCCGATACTGATTTGCTTGAGCGACAGAGAGGTAAGTGGAAATCCCGGTGTAAACAGTGA  
AATGTGTAGATATCGGGAGGAACACCACTGGCGAAGGCGACTTACTGGATGTCTGCTGAC  
ACTGAAACGCGAGAGCTAGGGGAGCAAACAGGATTAGATACCCCTAGTAGTCC

>Otu1074

CCAGCCTATGGGGTGGCACCAGTCGAGAATCTTCGGCAATGGGCGCAAGCCTGACCGAGCG  
ACGCCGCGTGTGGGACGAAGTTCTTCGGAAATGTAAACCACTGTCAGGGGTTAGAAAAGTTC  
TGATCAACCCAGAGGAAGGCACGGCTAACTCTGTGCCAGCAGCCGCGGTAATACAGAGG  
TGCCAAGCGTTAGGCGGAATCACTGGGCTTAAAGCGTGTGTAGGCGGAATTCCTAAGTGT  
TTGTGAAATCCCACGGCTCAACCGTGGAACTGCTCGATATACTGGAATTCCTGAGCCACT  
TAGGGGCGACCGGAACAAATGGTGGAGCGGTGAAATGCGTAGATATCATTTGGAACGCCA  
ATGGTGAACACAGGTCGCTGGGAGTGTGCTGACGCTGAGACACGAAAGCTAGGGGAGCAA  
ACGGGATTAGATACCCCACTAGTCC

>Otu1075

CCAGCCTATGGGGTGCTGTCAGTCGAGGATCTTCGGCAATGGGCGCAAGCCTGACCGAGCG  
ACGCCGCGTGTGGGATGAAGGCCTTCGGGTGTAAACCGCCGTCGGAGTGGAGGAAATTT  
CAAGGGGTACTCCCTTTGAATTGACTAATACTCAGAGGAAGGACGGGCTAAGTTTCGTGCC  
AGCAGCTGCGGTAAGACGAACCGTCCAAACGTTATTTCGGAATCACTGGGCTTAAAGGGTG  
CGTAGGCGGCTCAGAAAGTAGGGTGTGAAAGCCCTCGGCTCAACCGAGGAATTGCGCCCT  
AACTACTGGGCTCGAGGAAGACAGAGGTAAGCGGAACCTTACGGTGGAGCGGTGAAATGC  
GTCGATATCGTAAGGAACACCAGGAGCGAAAGCGGCTTACTGGGTCTTTTCTGACGCTGA  
GGCACGAAAGCTAGGGGAGCGAACGGGATTAGATACCCCACTAGTCC

>Otu1077

CCAGCCTATGGGGGGCACCAGTCGAGAATTTTTTACAATGGGCGCAAGCCTGATGGAGCG  
ACGCCGCGTGGGGGATGAATGGCTTCGGCCCGTAAACCCCTGTCATTTCGGAACAATGCC  
TGCGGCTTAATACGTTGCAGGTTGATAGTAGCGGAAGAGGAAGGGACGGCTAACTCTGTG  
CCAGCAGCCGCGGTAATACAGAGGTCCCAAGCGTTGTTTCGGATTCACTGGGCGTAAAGGG  
TGCGTAGGTGGTGGGTAAGTCTGACGTGAAATCTCCGAGCTTAACTCGGAAACGGCGTC  
GGATACTATTCGGCTCGAGGGTTGGAGGGGGGACTGGGATACTTGGTGTAGCAGTGAAAT  
GCGTAGATATCAAGTGGAACACCAGTGGCGAAGGTGAGTCCCTGGACAACCTCTGACGCT  
GAGGCACGAAAGCTAGGGGAGCAAACAGGATTAGATACCCCACTAGTCC

>Otu1078

CCAGCCTATGGGGTCGCTCCAGTGGGGAATTTTTCGCGCAATGGGGGAAACCCCTGACGCAGCA  
ACGCCGCGTGGAGGATGAAATCCCTTGGGATGTAAACTCCTTTTCGATCGGGAAGATAATG  
ACGGTACCGAGAGAAGAAGCCCCGGCTAACTTCGTGCCAGCAGCCGCGGTAATACGAGGG  
GGGCAAGCGTTGTTTCGGAATTATTGGGCGTAAAGGGTGGTAGGCGGTTTGATAAGTCAC



ATGTGAAATCTTCGGGCTCAACCCGAAGTCTGCATGCGAAACTGTCTGGGCTTGAGTATGG  
GAGAGGTGAATGGAATTCCTGGTGTAGCGGTGAAATGCGTAGATATCAGGAGGAACACCT  
GTGGCGAAAGCGGCTCACTGGACCATCACTGACGCTGAAACACGAAAGCTAGGGGAGCAA  
ACAGGATTAGATACCCTCGTAGTCC

>Otu1082

CCAGCCTATGGGGGGCAGCAGTAAGGAATCTTCCACAATGGACGAAAGTCTGATGGAGCA  
ATGCCGCGTGCAGGATGACGGCCTTCGGGTGTAAACTGCTTTTATATGGGAAGATTATG  
ACGGTACCATATGAATAAGGACCGGCTAACTACGTGCCAGCAGCCGCGTAATACGTAGG  
GTCCAAGCGTTATCCGGAATCACTGGGCGTAAAGAGTGTGTAGGCGGGAGTTCGCGTGCA  
ATGCGAAATCGTGTGGCTCAACCATATCGACTGTATTGCATACGGGACACCTAGAGGATA  
TGAGAGGCAAGTGAATTGGTAGTGTAGCAGTGAAATGCGTAGATATTACCAGGAACACC  
AATGGCGAAGGCAGCTTGCTGGCATATTTCTGACGCTGAGACACGAAAGCGTGGGGAGCA  
AACAGGATTAGAAACCCTAGTAGTCC

>Otu1083

CCAGCCTATGGGTTGCTGCAGTGAGGAATATTGCGCAATGGCCGAAAGGCTGACGCAGCG  
ACGCCGCGTGAGGATGAAGTCCGTTAGGATGTAAACTCCTTTTGCAGGGGATGAATGTG  
CCCTTTTCAGGGCATTGACCGTACCTTGCGAATAGGGATCGGCTAACTACGTGCCAGCAGC  
CGCGTAATACGTAGGATCCGAGCGTTGTCCGGAATTACTGGGTGTAAAGGGCGTGTAGG  
TGGGCTTTTAAGTCGGTAGTGAAATCCCGCAGCTCAACTGCGGAATTGCTTCCGATACTG  
GAAGTCTTGAGTACGGCAGAGGGAGATGGAATTCATGGTGTAGCGGTGAAATGTGTAGAT  
ATCATGAAGAACACCAGTAGCGAAGGCGGTCTCCTGGTCCGTTACTGACACTGGGGCGCG  
AAAGCGTGGGGAGCAAACAGGATTAGATACCCGTGTAGTCC

>Otu1084

CCAGCCTATGGGTGGCTCCAGTCGAGAATTTTTCACAATGGGGGAAACCCTGATCCAGCG  
ACGCCGCGTGTGTGAAGAAGGCCTGCGGGTGTAAAGCACTTTTAGTGGGGATGAAATGT  
GCAGGGCTAATACCTCTGCATTTTGACCTAACCACAGAAAAAGCACCGGCTAACTCTGT  
GCCAGCAGTCGCGTAATACAGAGGGTGCAAGCGTTAATCGGAATTACTGGGCGTAAAGC  
GTGCGCAGACGGTTACATAAGTCGGGTGTGAAAGCCCCGGGCTCAACCTGGGAATTGCAT  
TCGAGACTGTGTAGCTAGGGTACGGAAGAGGGAAGCGGAATTTAGGTGTAGCGGTGAAA  
TGCGTAGATATCTGAAGGAACACCAGTGGCGAAAGCGGCTTCCTGGTCCAGTACCGACGT  
TCAGGCACGAAAGCGTGGGGAGCAAACAGGATTAGAAACCCGCGTAGTCC

>Otu1085

CCAGCCTATGGGTGGCAGCAGTGGGGAATATTGGACAATGGGCGCAAGCCTGATCCAGCC  
ATGCCGCGTGAGTGATGAAGGCCTTAGGGTGTAAAGCTCTTTCGACGGGGACGATAATG  
ACGGTACCCGTAGAAGAAGCCCCGGCTAACTTCGTGCCAGCAGCCGCGAGTAATACGAAGG  
GGGCTAGCGTTGTTCCGAATCACTGGGCGTAAAGCGCACGCAGGCGGATCGTTAAGTCAG  
GGGTGAAATCCCGAGGCTCAACCTCGGAATGCCTCTGATACTGGCGATCTTCGAGTCCG  
GGAGAGGTGAGTGGAACCCCGAGTGTAGAGGTGAAATTCGTAGATATTCGGAAGAACACC  
AGTGGCGAAGGCGGCTCACTGGCCCGGTACTGACGCTCAGGTGCGAAAGCGTGGGGAGCA  
AACAGGATTAGAAACCCCTGTAGTCC

>Otu1086

CCAGCCTATGGGTTGCACCAGTGGGGAATCTTGCGCAATGGACGAAAGTCTGACGCAGCC  
ACGCCGCGTGAGTGAAGAAGGCCTTCGGGTGTAAAGCTCTGTGCGAGGGGACAAAAACG  
TTTAGGGTTAATAGCCCTAGATCTTGATGGTACCCTTAAAGGAAGCACCGGCTAACTTCG  
TGCCAGCAGCCGCGTAATACGAAGGGTGCAAGCGTTGCTCGGAAGTATTGGGCGTAAAG  
GGTAGGTAGGTGTTACGTATGTCTGGGGTGAATCCCTGAGCTCAACTCAGGAAGTGCC  
TTGGAAACGGCGTAAGTACTGAGAGGTTTCGTAGAATTCCTGGTGTAGCGGTGAA  
ATGCGTAGAGATCAGGAGGAATACCAGAGGCGAAGGCGGCGAACTGGACAGTTACTGACA  
CTCAACTACGAAAGCGTGGGGAGCAAACAGGATTAGATACCCCGTAGTCC

>Otu1090

CCAGCCTATGGGAGGCAGCAGTCGAGAATTTTTCACAATGGACGAAAGTCTGATGGAGCG  
ACGCCGCGTGAGGATGAAGGTTTTCGGATTGTAAACTCCTGTCACTGCAGAACAAGGAT  
GCATCAGTTAACAGCCGATGCATTTGATGGTATGCGGAGAGGAAGGGACGGCTAACTCTG  
TGCCAGCAGCCGCGTAAGACAGAGGTCCCGAGCGTTGTTCCGATTTCATTGGGCGTAAAG  
GGTGTGTAGGAGGTGGGTAAAGTCAGGTGTGAAATCTCAGAGCTTAACTCTGAAACTGCG  
CTTGATACTGCTCGGCTAGAGGATCGGAGGGGGTAACGGAATTTACGGTGTAGCAGTGAA  
ATGCGTAGATATCGTAAGGAAGACCAGTGGCGAAGGCGAATCTCTGGACAGTTACTGACA  
CTGAGGCACGAAGGCCAGGGGAGCAAACAGGATTAGAAACCCCGTAGTCC

>Otu1095

CCAGCCTACGGGTTGCAGCAGCTACATGTGCGCGCGCGCCGCTGATGTCGCCCACCTCTT  
CAGCGGCGCACAAATGAGCGCGCCGCGGAGGATGGTCCTGTGAAACGAACTGAGGGCCGA  
GTTGTATGACATCGGGTTAGGCGCGTTATTGGCGTTGGTCGGAATACTATTCCTTCGGTT  
TCGGCGCGACATCGGGGATGCGCTCAGCGGAGGAGCTCTACGCCATTGGGCCCCGAGCC  
CGCGAGACGACGAAATACAACCTTACAACCCGATTTTGGGCGGCATTTTGTTCCTCTCCGC  
TGGCATTTTTTTCGCCATTTGGGGTGTCTGCTAGCTCTCGTCACCAGTCACTGAATGTGCCA  
GGCAACTGCACAACAGGCTTCTGCCACGACGATTTTGAAGCGATTTCGCGTTAGCCCGCAC  
CCTCGCGTCTGCGGATTAGATACCCTAGTAGTCC

>Otu1096

CCAGCCTACGGGATGCACCAGTGGGGAATATTGGACAATGGGCGCAAGCCTGATCCAGCA  
ATGCCGCGTGAGTGATGAAGGCCTTAGGGTTGTAAAGCTCTTTCGCACGCGACGATGATG  
ACGGTAGCGTGAGAAGAAGCCCCGGCTAACTTCGTGCCAGCAGCCGCGGTAATACGAAGG  
GGGCGAGCGTTGTTTCGGAATTACTGGGCGTAAAGGGCGCGCAGGCGGCCCTTCAAGTCAG  
GCGTGAAAGCCCCGGGCTTAACCTGGGAAATGCGCTTGAGACTGGAAGGCTTGAGTTCGG  
GAGAGGATAGTGGAATTCACAGTGTAGAGGTGAAATTCGTAGATATTGGGAAGAACACCG  
GTGGCGAAGGCGGCTATCTGGACCGATACTGACGCTGAGGCGCGAAAGCGTGGGGAGCAA  
ACAGGATTAGAAACCCTAGTAGTCC

>Otu1097

CCAGCCTATGGGTTGCACCAGTAAGGAATATTGGACAATGGAGGCAACTCTGATCCAGCC  
ATGCCGCGTGAGGATGAAGGCGCTACGCGTTGTAAACTTCTTTTCCCTTAGAAAAAACT  
CTTGTTTTTCGTACCGAGACTGATTGTACAAGAGGAATAAGCATCGGCTAACTTCGTGCCA  
GCAGCCGCGGTAATACGAAGGATGCAAGCGTTATCCGGATTCACTGGGTTTAAAGGGTGT  
GCAGGTGGGGTAATAAGTCAGTGGTGATAGCCCCGACTCAATCGGGGAACTGCCATAGA  
TACTGTTATTCTTGAGTGTAGTTGAGGCGGATGGAATATGACATGTAGCGGTGAAATGCT  
TAGATATGTCATAGAACACCGATCGCGAAGGCAGTCCGCCAACTATTACTGACACTGAA  
ACACGAAAGTGCGGGGATCAAACAGGATTAGAACCCGCGTAGTCC

>Otu1099

CCAGCCTATGGGGTGCACCAGTGGGGAATATTGGACAATGGGCGCAAGCCTGATCCAGCC  
ATGCCGCGTGATGATGAAGGCCCTAGGGTTGTAAAGCTCTTTTGGCGGGGACGATGATG  
ACGGTACCCGCGAGAATAAGCCCCGGCTAACTTCGTGCCAGCAGCCGCGGTAAGACGAAGG  
GGGCTAGCGTTGTTTCGGAATTACTGGGCGTAAAGCGTGTGTAGGTGGTTGTCCAAGTTGG  
ATGTGAAAGCCTTGAGCTCAACTCAAGAAATGCATTACAGGACTGGATGGCTAGAGGACCG  
GAGAGGATAGTGGAATTCACAGTGTAGTGGTGAAATACGTAGAGATTGGGAAGAACACCA  
GTGGCGAAGGCGGCTATCTGGACGTTTTCTGACACTAAGACACGAAAGCGTGGGGAGCAA  
ACAGGATTAGAGACCCTAGTAGTCC

>Otu1100

CCAGCCTACGGGTGGCAGCAGTGGGGAATATTGGACAATGGGCGCAAGCCTGATCCAGCA  
ATGCCGCGTGTTGAAGAAGGCCTGCGGGTTGTAAAGTACTTTCGGTGGGGAGAAAGAGG  
CTATCACTAATACTGATAGCGGATGATGTTACCCACAGAAGAAGCACCGGCTAACTCTGT  
GCCAGCAGCCGCGGTAATACAGAGGTTGCGAGCGTTAATCGGAATTACTGGGCGTAAAGG  
GTGCGTAGGTGGTTGCGTAAGTTAGGTGTGAAAGCCCCGGGCTTAACCTGGGAATTGCGC  
TTGATACTGCGTGCGTAGAGTACTGTAGAGGAAGGTGGAATTTCCAGTGTAGCGGTGAAA  
TGCGTAGATATTGGAAGGAACATCGGTGGCGAAGGCGACCTTCTGGACAGATACTGACAC  
TGAGGCACGAAAGCATGGGGAGCAAACAGGATTAGATACCCCGTAGTCC

>Otu1102

CCAGCCTATGGGTGGCAGCAGTGGGGAATTTTGTGCAATGGGGGAAACCCTGACACAGCG  
ACACCGCGTGAGCGAAGAAGCCCTTTGGGGTGTAAAGCTCTGTGCGCTGGAACGAAAAAA  
ATGACGGTACCAGCAGAGGAAGCATCGGCTAACTACGTGCCAGCAGCCGCGGTAAGACGT  
AGGATGCGAGCGTTGTCCGGATTTATTGGGCGTAAAGAGTTCGTAGGTGGTTTGTAAAGT  
CTGATGTTAAAGACTGAGGCTCAACCTCGGAAATGCATTGGATACTGGCAGACTGGAGTG  
CAGTAGAGGCAAGTGGAATTCACAGTGTAGCGGTGAAATGCGTAGATATTGGGAAGAACA  
CCAGTGGCGTAAGCGACTTGCTGGGCTGTAACTGACACTGAGGAACGAAAGCCAGGGGAG  
CGAATGGGATTAGAAACCCTCGTAGTCC

>Otu1105

CCAGCCTATGGGTGGCAGCAGTGAAGGAATCTTCCACAATGGACGAAAGTCTGATGGAGCA  
ACGCCGCGTGACAGGATGACGGCTTTTCGGGTGTAAACTGCTTTTACTTGGGAAGATTATG  
ACGGTACCAAGTGAATAAGGACCGGCTAACTACGTGCCAGCAGCCGCGGTAATACGTAGG

GTCCAAGCGTTATCCGGAATTACTGGGCGTAAAGCGTGCGCAGGTGGCTCGTTAAGTGAG  
ACATTAAATCCAGCGGCTCAACCGTTTGGCTGTGTTTCATACTGGCGGGCTAGAGGATGG  
CAGAGGCAAGTGGAATTTGTAGTGTAGCAGTGAAATGCGTAGATATTACAAGGAACACCA  
ATGGCGAAGGCAGCTTGCTGGGCCACACCTGACACTCAGGCACGAAAGCGTGGGGAGCGA  
ACAGGATTAGATACCCCGGTAGTCG

>Otu1109

CCAGCCTACGGGTCGCTCCAGTAGGGAATCTTCCGCAATGGACGAAAGTCTGGCGGAGCA  
ACGCCGCGTGAGTGATGAAGGTTTTTCGGATCGTAAAGCTCCGTTGCCAGGGAAGAACGCT  
TGGGATAGTAACTGCTCCCAAGGTGACGGTACCTGAGAAGAAAGCCCCGGCTAACTACGT  
GCCAGCAGCCGCGGTAATACGTAGGGGGCAAGCGTTGTCCGGAATTATTGGGCGTAAAGC  
GCGCGCAGGCGGCCTTGTAAGTCTGTTGTTTAAACTCGGGGCTCAACCCCGAGTCGCAAT  
GGAAACTGCAAAGCTTGAGTACAGAAGAGGAAAGTGGAAATCCACGTGTAGCGGTGAAAT  
GCGTAGAGATGTGGAGGAACACCAGTGGCGAAGGCGACTTTCTGGGCTGTAAGTACGCT  
GAGGCGCGAAAGCGTGGGGAGCAAACAGGATTAGAAACCCGCGTAGTCC

>Otu1111

CCAGCCTATGGGTTGCTCCAGTCGAGAATTTTTCTCAATGGGGGAAACCCTGAAGGAGCG  
ACGCCGCGTGAGGATGAAGTCTTTCGGATTGTAAACTCCTGTCATGAGGGAACAAACCC  
GCAGTTTTAACTGATGTGCGGCTGATAGTACCTCAAGAGGAAGAGACGGCTAACTCTGTG  
CCAGCAGCCGCGGTAATACAGAGGTCCCAAGCGTTGTTTCGGATTTACTGGGCGTAAAGGG  
TGCGTAGGCGGCGGGGCCAGTCTGACGTGAAATCTCCGGGCCCAACCCGAAACTGCGTT  
GGATACTATCCGGCTAGAGGATTGGAAGGGAGACTGGAATACTTGGTGTAGCAGTGAAAT  
GCGCAGATATCAAGTGGAACACCAGTGGCGAAGGCGAGTCTCTGGACATTTCTTGACGCT  
GAGGCACGAAAGCCAGGGGAGCAAACGGGATTAGATACCCGAGTAGTCC

>Otu1112

CCAGCCTACGGGGTGCAACAGTAGGGAATCGTCGGCAATGCCCCGAAAGGGTGACCGCGCG  
ACGCCGCGTGCAAGGAAGAAGGCCTTCGGGTTGTAAACTGCTTTTGTAGGGGATAATTATG  
ATAGTACCCTAAGAATAAGGGCCTGCTAACTACGTGCCAGCAGCAGCGGTAATACGTAGG  
GCCCCGAGCGTTATCCGGAATTATTGGGCGTAAAGAGCGTGTAGGTGTTCTACCAAGTTGG  
TCGTTAAATCCGAGAGCTTAACTCTCGGGCGGCGAGCAAACTGGTGGAATTGAGGTTTG  
CAGGGGTGAGCAGAATTTCTGGAGTAGGGGTGAAATCCGTTGATACCAGAAGGAATACCA  
ATGGCGAAGGCAGCTCACTGGGCAATACCTGACACTGAGACGCGAAAGCGTGGGGAGCGA  
ACGGGATTAGAAACCCTAGTAGTCC

>Otu1116

CCAGCCTATGGGTCGCAGCAGTAGGGAATTTTCCACAATGGGCGAAAGCCTGATGGAGCA  
ACGCCGCGTGCAAGATGAATGCCTTCGGGTTGTAAACTGCTTTTATCTGTGACGAATATG  
ACGGTAGCAGATGAATAAGGATCGGCTAACTCCGTGCCAGCAGCCGCGGTCATACGGAGG  
ATCCAAGCGTTATCCGGAATTACTGGGCGTAAAGAGTTGCGTAGGTGGCAGTGTAAGCAA  
GTAGTGAAAGCCTGGGGCTCAACCCCTTACCCATTACTTGAAGTGCACAGCTAGAGGACG  
AGAGAGGTAATTGGAATTCCTAATGTAGGGGTAAAATCCGTTGATCTTAGGAGGAACACC  
GATGGCGTAGGCAGATTACTGGCTCGTTTCTGACACTAAGGCACGAAAGCGTGGGGAGCA  
AACAGGATTAGAAACCCGTGTAGTCC

>Otu1117

CCAGCCTATGGGGTGCAACAGTGGGGAATATTGCGCAATGGGCGAAAGCCTGACGCAGCG  
ACGCCGCGTGTTGGGATGACGGCCTTCGGGTTGTAAACCACTGTGCGGAGGGACGAAACAA  
ATGACGGTGCCCTCCAAGGAAGCACCGGCTAACTCTGTGCCAGCAGCCGCGGTAATACAG  
AGGGTGCGAGCGTTGTCCGGAATTACTGGGCGTAAAGGGCGCGTAGGCGGCCCCGATAAGT  
AGGGGGTGAAATTCGTTGGCTTAACCACGGAAGTGCCTTCTAAACTGTCAGGCTTGAGCA  
CGGTAGAGGCAGATGGAATTCGCGGTGTAGCGGTGGAATGCGTAGAGATCGGGAAGAACA  
CCAGTGGCGAAGGCGGTCTGCTGGGCCGTTGCTGACGCTGAGGCGCGACAGCGTGGGGAG  
CAAACAGGATTAGAAACCCGCGTAGTCC

>Otu1118

CCAGCCTATGGGATGCTGCAGGCGCGAAACCTTTACAATGCACGAAAGTGTGATAGGGGG  
ATACTCAGTGCTTACGACTCTGTTGTAGGCTTTTGTGTCGATCGTAAACAGATCGGCGAATA  
AGTGGTGGGTAAAGACTGGTGCCAGCCGCCGCGGTAACCCAGCGCCACAAGTGGTCATCG  
CGATTATTGGGCCTAAAGCGTTTCGTAGCCGGTTTGGTGCGTCTCTTGTGAAATTGTTTCGG  
CTTAACCGAACAGCGTGACAGGAGACACGGCCAGACTCGAGACCGGGAGGCGTGAAAAGTA  
TTCCATGGGGACTGGTAAAATGGGATAATCCATGGAAGACTACCGATGGCGAAGGCATTG  
CACGAGAACGGATCTGACGGTGAGGAACGAAAGCTAGGGGAGCGAACCGGATTAGAAACC

CTGGTAGTCC

>Otu1121

CCAGCCTACGGGGTGCAGCAGTGGGGAATTTTACGCAATGGGCGAAAGCCTGACGTAGCG  
ACACCGCGTGAGCGAAGAAGCCCTTTGGGGTGTAAAGCTCTGTCAGCTGGAACGAAACAA  
ATGACGGTACCAGCAGAGGAAGCATCGGCTAACTACGTGCCAGCAGCCGCGGTAAGACGT  
AGGATGCAAGCGTTGTCCGGATTTATTGGGCGTAAAGAGTTCGTAGGCGGTTTGGTAAGT  
CTGATGTTAAAGACCGAGGCTCAACTTCGGGACCGCATTGGATACTGCCAGACTGGAGTG  
TGGTAGAGGCTAGTGGAATTCCTAGTGTAGCGGTGAAATGCGTAGATATTAGGAAGAACA  
CCAGTGGCGTAGGCGACTAGCTGGGCCATTACTGACGCTGAGGAACGAAAGCCAGGGGAG  
CAAATGGGATTAGATACCCGCGTAGTCC

>Otu1122

CCAGCCTATGGGTTGCAGCAGTCGCGAAACCTTCGCAATACGCGAAAGCGTGACGAGGGA  
ACCCCAAGTGTGCATGTACAGCATGCACTTTTGCTAAGTTTAGAACACTTGAGAGAATAAG  
GGCTGGGTAAGACTGGTGCCAGCCTCCGCGGTAACACCAGCAGCTCAAGTGGCGATCACG  
TTTACTGGGTTTAAAGGGTGCCTAGTCGGTTTGGCAAGTTTCTGTGAAATCCTGGCGCT  
TAACGTCAGGGATTGCAGAAAATACTACCAAGCTAGAGACCGGGGTAGGAGTGAGGTATT  
CTGGGGGTAGCGGTGAAATGCTATAATCCCCGGAGGACCACCAGTAGCGAAGGCGTCCT  
CTGGAACGGGTCTGACGATGAGGTACGAGAGCTAGGGGAGCAAACAGGATTAGAAACCCG  
AGTAGTCC

>Otu1125

CCAGCCTACGGGATGCAGCAGTCGAGGATCTTCGGCAATGGGCGCAAGCCTGACCGAGCG  
ACGCCGCGTGTGCGATGAAGGCCCTTCGGGTGTAAAGCACTGTCGAGAGAAAGAAAGCCG  
CAAGGTTGATCGATCTCTGGAGGAAGCACGGGCTAAGTTCGTGCCAGCAGCCGCGGTAAG  
ACGAACCGTGCGAACGTTGTTCCGATTCACTGGGCTTAAAGGGCGCGTAGGCGGGTGATC  
AAGTCAGGGGTGAAATCCTCCAGCTTAACTGGAGAATAGCCTTTGATACTGGTCGTCTTG  
AGGAAGGTAGGGGCATGTGGAACCTCCGGTGGAGCGGTGAAATGCGTAGATATCGGAAGG  
AACGCCGCTGGCGAAAGCGACGTGCTGGACCTTTTCTGACGCTGAGGCGCGAAAGCCAGG  
GGAGCAAACGGGATTAGATACCCAGTAGTCC

>Otu1128

CCAGCCTATGGGACGCACCAGTAAGGAATATTGGACAATGGGGGCAACCCTGATCCAGCC  
ATGCCGCGTGAAGGATGAAGGCGCTCTGCGTCGTAAACTTCTTTTACTCGGGAAAAATTG  
TTGGGTTTCTACCCGACTTGATTGTACCGAGAGAATAAGGACCGGCTAACTTCGTGCCAG  
CAGCCGCGGTAATACGAAGGGTCCAAGCGTTATCCGGATTTATTGGGTTTAAAGGGTGCG  
TAGGCGGATTATTAAGTCAGTGGTGAAAGCTCCATGCTCAACATGGAAATTGCCATTGAT  
ACTGATGATCTTGAGTACACTTGAAGTGGGCGGAATATGTCATGTAGAGGTGAAATTCTT  
AGAGATGACATAGAACACCGATTGCGAAGGCAGCTCACTAAATTGTAACTGACGCTGAGG  
CACGAAAGCGTGGGGATCAAACAGGATTAGATACCCGTGTAGTCC

>Otu1130

CCAGCCTACGGGGCGCTCCAGTGGGGAATATTGGACAATGGGGGAAACCCTGATCCAGCC  
ATGCCGCGTGAGTGAAGAAGGCCTTAGGGTTGTAAAGCTCTTTTGGCGGGGACGATAATG  
ACGGTACCCGCGAGAATAAGCCCCGGCTAACTTCGTGCCAGCAGCCGCGGTAATACGAAGG  
ATGCAAGCGTTATCCGGATTTATTGGGTTTAAAGGGTGCCTAGGCGGACTTATAAGTCAG  
TGGTGAAATCTCGTTGCTTAACAACGAACGTGCCATTGATACTGTAGGTCTTGAGTACAG  
ATGCCGTTGGCGGAATGTGTCATGTAGCGGTGAAATGCATAGATATGACACAGAACACCG  
ATTGCGAAGGCAGCTGACGAAACTGTAACCTGACGCTGAGGCACGAAAGCGTGGGGATCAA  
ACAGGATTAGAAACCCTGGTAGTCC

>Otu1132

CCAGCCTATGGGGGGCACCAAGTGGGGAATCTTGCAGCAATGGGCGAAAGCCTGACGCAGCA  
ACGCCGCGTGAGGGATGAAGGTCTTCGGGTGTAAACCTCTTTCAAGCAGGGACGATAGT  
GACGGTACCTGCAGAAGAAGCTCCGGCCAACTACGTGCCAGCAGCCGCGGTGATACGTAG  
GGAGCGAGCGTTGTCCGGATTCATTGGGCGTAAAGAGCTCGTAGGCGGCTCAGTAAGTCA  
GGTGTGAAATCCTCAGGCTCAACCTGAGGTGCCATCTGATACTGCTGTGGCTAGAGCCC  
GGTAGGGGTCCACGGAATTCCTGGTGTAGCGGTGAAATGCGCAGATATCAGGAGGAACAC  
CAGTGGCGAAGGCGGTGGACTGGGCCGGTACTGACGCTGAGGAGCGAAAGCGTGGGGAGC  
GAACAGGATTAGAAACCCAGTAGTCC

>Otu1135

CCAGCCTACGGGGTGCTGCAGCAACGAATCTTCCCCAATGCCGGAACGGTGAGGGAGCG  
ACGCCGCGTGAAGGATGAAGTACTTCGGTATGTAAACTTCTAAAGGGGTATGAAAGCTG

AGGACCTAATACGTCCGGAGGTTGATCAGACCCTGATAAGGGGCGGCTAACTCTGTGCCA  
GCAGCCGCGGTAATACAGAGGCCCAAGCGTTACTGAGAATCACTGGGTTTAAAGGGTGC  
GTAGGTGGCGCGTTAAGTCCGTTGTGAAATCCCTTGGCTCAACCAAGGAACTGCTTCGGA  
TACTGGCGTGCTTGAGGCCGCTAGGGGTCACTGGAAGTACGGTGGAGCGGTGAAATGCG  
TAGATATCGTCAGGAACGCCGTTGGTGAAGACGGGTGACTGGGCCGTTCTGACACTGAG  
GCACGAAAGCGTGGGTAGCAAACAGGATTAGAAACCCCTGTAGTCC

>Otu1136

CCAGCCTATGGGTCGCAGCAGTGGGGAATTTTGGACAATGGTGGCAACACTGATCCAGCC  
ATGCCGCGTGCAAGATGAAGGCGCTACGCGTTGTAAACTGCTTTTGTACGGGAGAAAACC  
TATCTACGTGTAGATAGCTGATAGTACCGTAAGAATAAGCATCGGCTAACTTCGTGCCAG  
CAGCCGCGGTAATACGAAGGATGCAAGCGTTATCCGGATTTATTGGGTTTAAAGGGTGC  
TAGGCGGACTTATAAGTCAGTGGTGAATCTCGTCGCTTAACGACGAACGTGCCATTGAT  
ACTGTAGGTCTTGAGTACAGATGCCGTTGGCGGAATGTGTCATGTAGCGGTGAAATGCTT  
AGATATTACACAGAACACCGATTGCGAAGGCAGCTTGCTGGGCCATTACTGACGCTGATG  
CACGAAAGCGTGGGGAGCAAACAGGATTAGAGACCCCTGTAGTCC

>Otu1137

CCAGCCTACGGGTGGCAGCAGTGGGGAATACTGGACAATGAGCTAACGCTTGATCCGGCA  
ATGTTAAACGAATGAAATGAAAGTAATGAGCTGTAAAATTCACAAAGTTGGTTTATATAT  
ATAATGAATGAATTGATAAAGCCCCGACTAACTTCGTGCCAGCAGTCGCGGTAATACGGA  
GGGGGCGAGTGTTACTCATCATGACTAGGCGTAAAGGGTGCTAAGACGGCTATGGTTGT  
TCTGGTATAAACTCAATGGAAATATTGAATTTAGCCAAATAAACAATTTAGCTAGGGTA  
GGTTGGAGAATAGGGTTACTGATTTTTGAGGGGTAGAATCCGACGAGAAGATTAGGAGAT  
ACAAAGGCGAAGGCAACTATTTATGACAACTAACGTTGAGACACAAAAGCGTGGGTAGC  
AAACAGGATTAGAAACCCGTGTAGTCC

>Otu1138

CCAGCCTATGGGAGGCTGCAGTGGGGAATCTTGCGCAATGCGCGAAAGCGTGACGCAGCA  
ACGCCGCGTGGGTGAAGAAGGCCCTCGGGTTGTAAAGCCCTTTCAGTTGGGACGAAGCTT  
CGTCGGTGAATAGCCGACCGGAGTGACGGTACCTTCAGAAGAAGCCCCGGCTAACTACGT  
GCCAGCAGCCGCGGTAATACGTAGGGGGCAAGCGTTGTCCGGAATCATTGGGCGTAAAGC  
GCGTGTAGGCGGCTCGATAAGTCTGCTGTGAAAGTCCAGGGCTCAACCCTGGAATGCCGG  
TGGATACTGTCTGGGCTAGAGTACGGAAGAGGTGAGTGAATTCCTGGTGTAGCGGTGAAA  
TGCGCAGATATCAGGAGGAACACCAATGGCGAAGGCAGCTCACTGGGACGTTACTGACGC  
TGAGACGCGAAAGCGTGGGGAGCAAACAGGATTAGATACCCGCGTAGTCC

>Otu1140

CCAGCCTATGGGGTGCAGCAGTCGAGGATCTTCGGCAATGGGCGCAAGCCTGACCGAGCG  
ACGCCGCGTGCGCGACGAAGGCCTTCGGGTGTAAAGCGCTGTCTGAGGGGGAGGAAGCCG  
CAAGGTTGACCTATCCCGGGAGGAAGCACGGGCTAAGTTCGTGCCAGCAGCCGCGGTAAG  
ACGAACCGTGCGAACGTTGTTTCGGAATCACTGGGCTTAAAGGGCGCGTAGGCGGGCCGTC  
TGGTCCGGGGTGAAATCCCACCGCTTAACGGTGGGACTGCCTGGGATATCGGCGGTCTGG  
AGGGGGGTAGGGGCACGTGGAACCTCCGGTGGAGCGGTGAAATGCGTTGATATCGGAAGG  
AACGCCGCTGGCGAAAGCGACGTGCTGGGCCTTTCCTGACGCTGAGGCGCGAAAGCCAGG  
GGAGCGAACGGGATTAGAGACCCCTGTAGTCC

>Otu1141

CCAGCCTATGGGTGGCTGCAGTGGAAGTGAACAAGGTCCACACTCTTGAAGAGGCAGCA  
GTGAAGAATCATGGTCAATGCGCGCAAGCGTGAACCTGCGATCCGTCCAGTGGGATGAAG  
GAGGTTTCTGTAAACCACCGTCCGTTCTCTGAAGCGCGATGGGAGAACGGGGCAGTCGTG  
ATGAATCCTTGTGCCAGCAGTCGCGGTACACAAGAGCGGCAAATGTTACTCGTGCGGAA  
TGGGTCTAAAGCGTGCGTAGGTGGAGGGATGGGAGGGCGTTTGGAGTGAGCATGGGATCC  
ATGTGCAAGGACGCCCCGTCTCCCTCTGGAGGCACTGAGAGGGGAGAAGAATGTCCAGGG  
GACCGATGAAATGGGAGGATCCTGGATGGAACACCAAAGGCGCAGGCATCTCTCTGGCAG  
TGCCTGACACTGAGAGCACGAAGGCGTGGGGAGCAAACGGGATTAGATACCCCTTCC

>Otu1142

CCAGCCTACGGGAGGCAGCAGTTGGGAATCTTGGACAATGGTGGCAACACTGATCCAGCC  
ATGCCGCGTGAAAGATGAAGGCGCTATGCGTCGTAAACTTCTTTTGAACGGGAGAAACCC  
CTCGTACGTGTACGGGGCTGATAGTACCGTTAGAATAAGGGTCGGCTAACTTCGTGCCAG  
CAGCCGCGGTAATACGAAGGACCCGAGCGTTATCCGGATTCATTGGGTTTAAAGGGTGC  
TAGGCGGAATGATAAGTCAGTGGTGAATCCTGCAGCTTAACTGCAGAACTGCCATTGAT  
ACTGTCAATCTTGAATACAACTGATGTGGGCGGAATGTGCCATGTAGTGGTGAATACTT

AGATATGGCACAGAACACCGATTGCGAAGGCAGCTCACAAAATTGTTATTGACGCTGATG  
CACGAAAGCGTGGGGATCAAACAGGATTAGATACCCCTGTAGTCG  
>Otu1145  
CCAGCCTACGGGATGCAGCAGTGGGGAATATTGGACAATGGGGGAAACCCTGATCCAGCG  
ACGCCGCGTGTGTGAAGAAGGCCTGCGGGTTGTAAAGCACTTTTGTCCGGAAAGAAATCC  
TCTTCGATAATACCGAGGGGGGATGACGGTACCGGAAGAATAAGCACCGGCTAACTACGT  
GCCAGCAGCCGCGTAATACGTAGGGTGCAAGCGTTAATCGGAATTACTGGGCGTAAAGC  
GCGCGTAGACGGTTTTGTAAAGTCAGATGTGAAATCCCTGGGCTCAACCTGGGAACTGCAT  
TTGAGACTGCATGGCTAGAGTATGGAAGAGGGAAGTGAATTTCCGGTGTAGCGGTGAAA  
TGCGTAGATATCGGAAGGAACACCAGTGGCGAAAGCGACTTCCTGGTCCAATACTGACGT  
TCATGTGCGAAAGCGTGGGGAGCAAACAGGATTAGATACCCCCGTAGTCC  
>Otu1146  
CCAGCCTATGGGGGGCACCAGTGGGGAATCTTGGACAATGGGGGAAACCCTGATCCAGCC  
ATGCCGCGTGAGTGATGAAGGCCTTCGGGTGTAAACTCTTTTACCTGGGAAGATAATG  
ACTGTACCAGGAGAATAAGCCCCGGCTAACTTCGTGCCAGCAGCCGCGGTAATACGAAGG  
GGGCTAGCGTTGTTTCGAATTACTGGGCGTAAAGCGTGCGCAGGCGGCTTCTCAAGTCAG  
GGGTGAAAGCCCAGAGCTCATCTCTGGAATTGCCTTTGAAACTGTGAAGCTTGAGTACGA  
GAGAGGTGAGTGGAATTCCCAGTGTAGAGGTGAAATTCGTAGATATTGGGAAGAACACCG  
GTGGCGAAGGCGGCTCACTGGCTCGTAACCTGACGCTCAGGCACGACAGCGTGGGGATCAA  
ACAGGATTAGATACCCGAGTAGTCC  
>Otu1147  
CCAGCCTATGGGGGGCACCAGTGGGGAATTTTCCGCAATGGGCGAAAGCCTGACGGAGCA  
ACGCCGCGTGATGATGAAGTCTTTCGGGACGTAAATCCTTTCAGCAGGGACGAATAAA  
GTGACGGTACCTGCAGAAGAAGCATCGGCTAACTACGTGCCAGCAGCCGCGGTAATACGT  
AGGATGCGAGCGTTGTCCGGAATTATTGGGCGTAAAGCGAACGTAGGCGGCGAGTTAAGT  
TTGGTCTTAAAGACTGGGGCTCAACCCCAGGAGTGGACTGAAAACCTGATTTGCTAGAGGA  
TGTCAGAGGAAAAGTGAATTCGAGTGTAGCGGTGAAATGCGTAGATATTCGGAGGAACA  
CCAGTGGCGAAAAGCGACTTTCTGGGGCATTCCTGACGCTGAGGTTTCGAAAGCTCGGGGG  
CAAACAGGATTAGAGACCCCCGTAGTCC  
>Otu1148  
CTAGCCTATGGGGGGCTGCAGTCGAGGATCTTCGGCAATGGGCGCAAGCCTGACCGAGCG  
ACGCCGCGTGCGCGATGAAGGCCTTCGGGTGTAAAGCGCTGTTCGAGGGGGAGGAAAGCC  
GTAAGGTCTGACCTATCCCTGGAGGAAGGACGGGCTAAGTTCGTGCCAGCAGCCGCGGTA  
AGACGAACCGTCCAAACGTTGTTTCGGAATCACTGGGCTTAAAGGGCGCGTAGGCGGGCCA  
GCAAGTCCGGGTGAAATCTTTCGGCTTAACCGGAAAAGTGCCTTGGAACCTGCTGGTCT  
AGAGGGAGGTAGGGGCATGTGGAACCTCCGGTGGAGCGGTGAAATGCGTTGATATCGGAA  
GGAACGCCGGTGGCGAAAGCGACGTGCTGGATCTCTTCTGACGCTGAGGCGCGAAAGCCA  
GGGGAGCAAACGGGATTAGAAACCCGCGTAGTCC  
>Otu1149  
CCAGCCTACGGGTCGCTGCAGTGGGGAATCTTGACAATGGAGGCAACTCTGATGCAGCG  
ACGCCGCGTGAGCGATGAAGCCCCTCGGGGTGTAAAGCTCTTTCGGCAGGGAAGATTATG  
ACGGTACCCATAGAAGAAGCCCCGGCTAACTTCGTGCCAGCAGCCGCGGTAATACGAGGG  
GGGCAAGCGTTGTTTCGATTATTTGGGCGTAAAGGGTGCCTAGGCGGTTTGGCAAGTCTT  
GTGTGAAATCTTCGGGCTCAACCCGAAGCCTGCATAAGAACTGCCGGGCTTGAGTATGG  
GAGAGGTGAGTGGAATTTCCGGTGTAGCGGTGAAATGCGTAGATATCGGAAGGAACACCT  
GTGGCGAAAGCGGCTCACTGGACCATAACTGACGCTGATGCACGAAAGCTAGGGGAGCAA  
ACAGGATTAGAAACCCCCGTAGTCC  
>Otu1151  
CCAGCCTACGGGTCGCACCAGTGGGGAATTTTGGACAATGGGGGCAACCCTGATCCAGCG  
ACGCCGCGTGAAGGATGAAGGTCTTCGGATTGTAAACTCTTTTAGAGGAGACGAATGCC  
TGCGTGAAGAGCGCAGGGTGACGGTATTCTCTGAATAAGCCACGGCTAACTACGTGCCAG  
CAGCCGCGGTAATACGTAGGTGGCAAGCGTTATTCGGAATCACTAGGCGTAAAGCGCAGG  
TAGGCGGTTGGGTAAAGTCTCTTGTGAAAGCTCCCGGCTTAACCTGGGAGAGGCCAAGGGAA  
ACTACCCGGCTAGAGTGTGGTAGAGGAACTGGAATTCCTGGTGTAGCGGTGAAATGCGT  
AGATATCGGGAGGAACACCTATGGCGAAAGCAGGTTTCTGGGCCATCACTGACGCTGAGC  
TGCGAAAGCTAGGGGAGCAAACAGGATTAGATACCCTAGTAGTCC  
>Otu1152  
CCAGCCTATGGGGCGCTGCAGTGGGGAATTTTGTGCAATGGGCGAAAGCCTGACACAGCG

ACACCGCGTGAACGAAGAAGCTCTTTGGAGTGTAAGTTCTGTGCGGCTGGAACGAAAAACA  
ATGACGGTACCAGCAAAGGAAGCATCGGCTGACTACGTGCCAGCAGCCGCGGTAAGACGT  
AGGATGCAAGCGTTGTCCGGATTTATTGGGCGTAAAGAGTTCGTAGGCGGTTTACTAAGT  
CTGATGTTAAAGATCGGGGCTCAACCCTGAGAGTGCATTGGATACTGGTAGGCTTGAGTG  
TGGTAGAGGCTAGTGGAATTTCCAGTGTAGCGGTGAAATGCGTAGATATTGGGAAGAACA  
CCAGTGGCGTAGGCGACTAGCTGGGCCATAACTGACGCTGAGGAACGGAAGCCAGGGGAG  
CGAATGGGATTAGAACCCCCGTAGTCC

>Otu1153

CCAGCCTATGGGTGGCAGCAGTGGGGAATCTTGACAATGGGCGAAAGCCTGATCCAGCA  
ATGTCGCGTGTGTGAAGAAGGCCTTAGGGTTGTAAACACTTTCAGCAATGAAGAAGTAA  
AACTTGCTAATATCTAGTTTTATTGACGTTAATTGAAGAAGAAGTACTGGCTAACTCTGT  
GCCAGCAGCCGCGTAATACAGAGAGTGCAAGCGTTAATCGGAATTATTGGGTGTAAAGG  
GTGTGTAGGTGGATAAAAAAGTTACATGTGAAATCCCTGAGCTTAACTTAGGAACTGCAT  
GTAATACTTTTTATCTAGAGTATTGTAGAGGAAAGTAGAATTTCCGGTGTAGCGGTGAAA  
TGCGTAGATATCGGAAGGAATACCAGAGGCGAAGGCGACTCTCTGGCCAATTACTGACAC  
TGAGGCACGAAAGCATGGGGAGCAAACAGGATTAGATACCCAGTAGTCC

>Otu1155

CCAGCCTACGGGATGCTGCAGTTTGGAAATTTGGACAATGGGCGAAAGCCTGATCCAGCG  
ACGCCGCGTGGACGATGAAGGCCTTCGGGTGTAAGTCTTTTGCTCGGGAACAATATT  
TTGAGCGTACCGAGAGAATAAGAGGTTGCTAACTCTGTGCCAGCAGCAGCGGTAATACAG  
AGACCTCAAGCGTTATCCGGAATCATTGGGCGTAAAGCGTACCGATAGGTGGTTTTACAA  
GTCAGAAGTGAAATCTCTCAGCTTAACTGGGAGACTGTCTTTTGAACTGTAAACTAGA  
GGGGCAAAGAGGAAGCTGGAACAAGCGGTGTAGTAGTGAAATGCGTTGATATCGCTTGGA  
ACACCAATAGCGTAGGCAGGCTTCTGGGTGCCACCTGACACTGCTAGGACGAAAGCGTGG  
GGAGCGAATGGGATTAGATACCCCCGTAGTCC

>Otu1156

CCAGCCTATGGGAGGCTCCAGTGGGGAATCTTGCGCAATGGGCGAAAGCCTGACGCAGCG  
ACGCCGCGTGAGTGATGAAGGCCTTCGGGTGTAAGTCTGTGGGGAGAGACGAATAAG  
TGCCGCCTAATACGTTGCATGATGACGGTATCTCCTTAGCAAGCACCGGCTAACTCTGTG  
CCAGCAGCCGCGGTAAGACAGAGGGTGCAAACGTTGTTTCGGAATTACTGGGCGTAAAGCG  
AGTGTAGGCGGTCTGAAAAGTCGGGTGTGAAAGCCCTGGGCTCAACCCAGGAAGTGCAC  
CGAAACTGCCAGGCTAGAGTGTCGGAGAGGTTGGTGGAATTCTCGGTGTAGAGGTGAAAT  
TCGTAGATATCGAGAGGAACACCGGTGGCGAAGGCGGCCAACTGGACGAACACTGACGCT  
GAGACTCGAAAGCGTGGGGAGCAAACAGGATTAGAAACCCTAGTAGTCC

>Otu1157

CCAGCCTACGGGGTGCTGCAGTCGAGAATATTTAGCAATGGACGAAAGTCTGACTATGCG  
ACGCCGCGTGAGGGATGAAGTATTTCCGTACGTAAACCTCTTTCGATAGGGAAGATACTA  
CCTGTAGTAATACAGGAAGTACGGTACCTAGAGAAGAAGCCATGGCCAACCTCCGTGCCA  
GCAGCCGCGGTAATACGGGGATGGCGAGCGTTACTCGGATTTACTGGGTGTAAAGGGCAG  
GTAGGCGGCTCCGCAAGTTGAAGGTGAAATGCTCTGACTCAATCAGAGAAGTGCCTTCAA  
AACTACGGGGCTTGAGGATTTGAGAGGAGAGCGGAATTCCCGGTGTAAGGGTGAAATCTG  
TAGATATCGGGAGGAACACCCGTGGCGAAAGCGGCTCTCTGGCAAATCCCTGACGCTGAG  
CTGCGAAAGCTAGGGGAGCAAACAGGATTAGAAACCCAGTAGTCC

>Otu1158

CCAGCCTATGGGGGGCTCCAGTAGGGAATATTGCACAATGGAGGAAACTCTGATGCAGCG  
ACGCCGCGTGAGTGACGAAGGCCTTCGGGTGTAAGTCTGTTCAGGGAAAAAGAAA  
GTGATTGCACTTGAGAAGAAAGGACCGGCTAACTTCGTGCCAGCAGCCGCGGTAAGACGA  
GGGTCCAAGCGTTGTTCCGAATCATTGGGCGTAAAGCGGTGTAGGCGGCTCTATAAGT  
CAGGAGTGAAAGCCCCGAGCTTAACTCGGGAAGTGCTTTTGATACTGCAGAGCTTGAATG  
TGGGAGAGGGTAGTGGAATTCAGGTGTAGTGGTGAAATACGTAGATATCTGGAGGAACA  
CCGGTGGCGAAGGCGGCTACCTGGCCCAACATTGACGCTGAGACCCGAAAGCATGGGGAT  
CAAACAGGATTAGATACCCTCGTAGTCC

>Otu1159

CCAGCCTATGGGTCGCACCAGTCGAGAATTTTTCACAATGGGGGAAACCCTGATGGAGCG  
ACGCCGCGTGAGGATGAAGGTTTTCCGATTGTAAACTCCTGTCATGAGAGAACAAAACC  
CGCAAGGGCTTGATAGTATCTCAAGAGGAAGGGACGGCTAACTCTGTGCCAGCAGCCGCG  
GTAATACAGAGGTCCCAAGCGTTGTTCCGACTCACTGGGCGTAAAGGGTGCGTAGGTGGC  
GGGGCAAGTTGCGTGTTAAATCTCAAGGCTCAACCTTGAAACCGCTCGCAATACTGCTCT

GCTGGAGGACTGTAGAGGAGACTGGAATTCACGGTGTAGCAGTGAAATGCGTAGATATCG  
TGAGGAAGACCACTGGCGAAGGCGAGTCTCTGGGCAGTTCCTGACACTGAGGCACGAAGG  
CCAGGGGAGCAAACGGGATTAGAGACCCCCGTAGTCC

>Otu1161

CCAGCCTATGGGAGGCAGCAGTCGAGAATTTTTCTCAATGGGGGAAACCCTGAAGGAGCG  
ACGCCGCGTGAGGATGAAGGTTTTCGGATTGTAACTCCTGTCATTGGGGAACAAGTGT  
TCGGGGAGTAACTGCCCTGGATTTGATAGTACCCGAAGAGGAAGAGACGGCTAACTCTGT  
GCCAGCAGCCGCGTAATACAGAGGTCTCAAGCGTTGTTTCGGATTTCATTGGGCGTAAAGG  
GTGCGCAGGCTGTTGTGTAAGTCGGATGTGAAATCCCGGGGCTCAACCCCGGAACTGCAT  
TCGATACTGCATGACTAGAGGACTGGAGAGGAGATTGGAATTCACGGTGTAGCAGTGAAA  
TGCGTAGATATCGTGAGGAAGACCACTGGCGAAGGCGAATCTCTGGACAGTTCCTGACGC  
TCATGCACGAAGGCTAGGGGAGCAAACGGGATTAGAAACCCGAGTAGTCC

>Otu1162

CCAGCCTATGGGTTGCTGCAGTCGAGAATCTTCCGCAATGGGCGAAAGCCTGACGGAGCG  
ACGCCGCGTGACTGATGAAGTTCTTCGGAACGTAAAGGTCTTTTGTGAGGTAGAAAGTAA  
TTGATCGCCTCAAGAATAAGGGGTTGCTAAACTCGTGCCAGCAGCAGCGGTAATACGAGT  
GCCCCGAGCGTTATCCGGAATTATTGGGCGTAAAGGGTGTGTAGGCGGCTCTGTTAGTCT  
TTTGTAAACTCCCGGCTCAACCGGGAAGGTGCAAAAGAAACGGCAGAACTTGAGGGTG  
CGAGAGGTGAATGGAATCATAGTGTAGGGGTGAAATCCGTTGATATTATGGGGAACACC  
AAAAGCGAAGGCAATTCCTGCGCATTCCTGACGTTGAAACACGAAAGCGTGGGTAGCG  
AATGGGATTAGAAACCCCTCGTAGTCC

>Otu1163

CCAGCCTACGGGTCGCACCAGTCGAGAATCTTCCGCAATGGACGAAAGTCTGACGGAGCG  
ACGCCGCGTGTTGATGAAGCGCTTCGGCGCGTAAAAACCTTTTATGAGCGACTAAGTTT  
ATTGAAGAGCTCATGAATAAGAGGTTGCTAAACTCGTGCCAGCAGCAGCGGTAATACGAG  
TGCCCTCAAGCGTTATCCGGAATTATTGGGCGTAAAGGGTGTGTAGGCGGCTATGTTAGTC  
TCGCGTTAAATTCCTCGGCTCAACCGGGGGTCTGCGCGGGAAACGGCATGGCTTGAGGAT  
GCGAGGGGTCTCTGGAATCATGGTGTAGCGGTGAAATGCGTTGACATCATGGGGAACAC  
CAAGAGCGAAGGCAGGAGACTGGAGCATTTCTGACGCTGAAACACGAAAGCGTGGGTAGC  
GAATGGGATTAGAAACCCCGTAGTCC

>Otu1164

CCAGCCTATGGGGTGCTGCAGTGGGGAATTTTGGACAATGGGGGAAACCCTGATCCAGCA  
ACGCCGCGTGAAATGAAGAAGGCCTTAGGGTTGTAAAGTTCTTTTATCTGGGAGCAAAGTG  
TATGTGTTAATAGCGCATATATATGAGAGTACCAGAGGAATAAGCACCGGCTAACTACGT  
GCCAGCAGCCGCGTAATACGTAGGGTGCGAGCGTTAATCGGAATTACTGGGCGTAAAGG  
GTGTGTAGGCGGTTGTGTAAGTTAGATGTGAAATACCTGGGCTTAACCTGGGAACTGCAT  
TTAAGACTGCATGGCTAGAGTTTGTGAGAGGGGGTAGAATCCAAGTGTAGCAGTGAAA  
TGCGTAGAGATTGGAGGAATACCGATGGCGAAGGCAGCCCCCTGGGATAGAACTGACGC  
TGAAACACGAAAGCGTGGGTAGCAAACAGGATTAGAAACCCCGTAGTCC

>Otu1165

CCAGCCTACGGGGTGCGAGCAGTAAGGAATCTTCCACAATGGACGAAAGTCTGATGGAGCA  
ACACCGCGTGCAAGATGAAGGCTTTCGGGTCGTAAACTGCTTTTATAGAGGAAGATTATG  
ACGGTACTCTATGAATAAGGACCGGCTAACTACGTGCCAGCAGCCGCGGTAATACGTAGG  
GTCCAAGCGTTATCCGGAATCACTGGGCGTAAAGCGTGCGTAGGTGGTCTGTTAAGTGAG  
ATATTAAAGCGTGTGGCTCAACCATATCGTTGTGTCTCATACTGGCAGACTAGAGGACGG  
CAGAGGCAAGTGGAATTACTAGTGTAGCAGTGAAATGCGTAGATATTAGTAGGAACACCA  
ATGGCGAAGGCAGCTTGCTGGGCCGCCCTGACACTGAGGTACGAAAGCGTGGGGAGCGA  
ACAGGATTAGAGACCCCAGTAGTCC

>Otu1169

CCAGCCTACGGGAGGCTGCAGTGGGGAATATTGGACAATGGGCGCAAGCCTGATCCAGCA  
ATGCCGCGTGAGTGATGAAGGCCTTAGGGTTGTAAAGCTCTTTCGGGTGGGACGATGATG  
ACGGTACCACCAGAAGAAGCACCGGCTAACTCCGTGCCAGCAGCCGCGGTAATACGGAGG  
GTGCGAGCGTTGTTTCGGAATTATTGGGCGTAAAGCGCGTGTTAGGCGGTTTTTTAAGTCTG  
ATGTGAAAGCCCTGGGCTCAACCCGGGAAGTGCAATTGGAAACTGGGAGACTTGAATACGG  
GAGAGGGTAGTGGAATTCCTGGTGTAGGAGTGAAATTCGTAGATATCAGGAGGAACACCG  
GTGGCGAAGGCGGCTTCCTGGACCGATACTGACGCTGAGACGCGAAAGCGTGGGGAGCAA  
ACAGGATTAGAAACCCCGGTAGTCC

>Otu1173



CCAGCCTACGGGAGGCTGCAGTAGGGAATTTTCCACAATGGACGAAAGTCTGATGGAGCA  
ACGCCGCGTGAGGATGAAGGCCTTAGGGTTGTAACTGCTTTTATTTGTGACGAATATG  
ACGGTAGCAAATGAATAAGGATCGGCTAACTCCGTGCCAGCAGCCGCGGTACATACGGAGG  
ATCCAAGCGTTATCCGGAATTACTGGGCGTAAAGAGTTGCGTAGGTGGCATTGTAAGCGA  
GTAGTGAAAGCGTTCGGCTCAACCGAATACACATTACCCGAACACAAAGCTAGAGGACG  
AGAGAGGTTATTGGAATTCCTAGTGTAGGAGTGAAATCCGTAGATATTAGGAGGAACACC  
GATGGCGTAGGCAGATAACTGGCTCGTTCCTGACACTAAGGCACGAAAGCGTGGGTAGCA  
AACGGGATTAGATAACCCAGTAGTCC

>Otu1175

CCAGCCTACGGGAGCGCAGCAGTAGGGAATTTTGCGCAATGGACGAAAGTCTGACGCAGC  
AACGCCGCGTGAGTGATGAAGGTCTTCGGATTGTAAAGCTCTGTTGAGTGGGAAGAACGA  
TTCTGCATCTAATACATGCGGGATATGACGGTACCATTTCGAGGAAGCTCCGGCCAACTAC  
GTGCCAGCAGCCGCGGTAATACGTAGGGAGCAAGCGTTGTTTCGGAATTACTGGGCGTAAA  
GGGAGAGTAGGCGGAAAGGTAAGTTAGGAGTGAAATGTACGGGCTTAACCCGTAATCTGC  
TTTTAATACTGCCATTCTTGAGTATGGGAGAGGATGATAGAATTCCAGGTGTAGCGGTGG  
AATGCGTAGATATCTGGAAGAATACCAGTTGCGAAGGCGGTTCATCTGGCCCAATACTGGC  
GCTGAGGCTCGAAAGCTAGGGGAGCAAACAGGATTAGAGACCCGAGTAGTCC

>Otu1176

CCAGCCTATGGGTGCTGCAGTGGGGAATCTTGCGCAATGGGCGAAAGCCTGACGCAGCGA  
CGCCGCGTGGGTGATGAAGGCCTTCGGGTGTAAAGCCCTGTGGGGAGAGACGAATAAGG  
TCGCGCTAATACCTCGACCGATGACGGTATCTCCTTAGCAAGCACCGGCTAACTCTGTGC  
CAGCAGCCGCGGTAAGACAGAGGGTGCAAACGTTGTTTCGGAATTACTGGGCGTAAAGCGT  
GTGTAGGCTGCCGCGCAAGTCGGATGTGAAAGCCCCGGGCTCAACCCGGGAAGTGCACCC  
GAAACTGCGTGGCTCGAGTACCGGAGAGGTGGCGGAATTCTCGGTGTAGAGGTGAAATT  
CGTAGATATCGAGAGGAACACCGGTGGCGAAGGCGGCCAACTGGACGAGTACTGACGCTG  
AGACACGAAAGCGTGGGGAGCAAACAGGATTAGATAACCCCGTAGTCC

>Otu1177

CCAGCCTACGGGGGGGCTCCAGTGGGGAATTTTGCGCAATGGACGGAAGTCTGACGCAGCA  
ACGCCGCGTGGGTGATGAAGGTCTTCGGATCGTAAACCCCTGTCGTCAGGGACGAAGGTT  
ACGAGTTTAAGAGATGCGTAGCTTGACGGTACCTGGAGAGGAAGCCCCGGCTAACTCTGT  
GCCAGCAGCCGCGGTAATACAGAGGGGGCAAGCGTTATTTCGGAATTATTGGGCGTAAAGG  
GCGCGTAGGCGGTTTTGTAAAGTGAGATGTGTAATCCCCGGGCTCAACTTGGGAAGTGCAT  
CTGGGACTGCGAGACTAGAGTGCTGGAGAGGGTGGTAGAATTCATGTGTAGCGGTGAAA  
TGCGTAGAGATGTGGAGGAATACCAGTGGCGAAGGCGGCCACCTAGACAGTAAGTACGC  
TGAGGCGCGAAAGTGTGGGTAGCAAACAGGATTAGATAACCCAGTAGTCC

>Otu1178

CCAGCCTATGGGGGGGCTGCAGTGGGGAATATTGCGCAATGGGGGAAACCCTGACGCAGCA  
ACGCCGCGTGAATGATGAAGGCCTTCGGGTGTAAAGTTCTGTCTTCTGGGACGATAATG  
ACGGTACCAGAGGAGGAAGCCACGGCTAACTACGTGCCAGCAGCCGCGGTAATACGTAGG  
TGGCAAGCGTTGTCCGATTACTGGGCGTAAAGGATGCGTAGGCGGACATTTAAGTCAG  
ATGTGAAATACCCGAGCTTAACTTGGGTGCTGCATTTGAAACTGGGTGCTAGAGTGCAG  
GAGAGGTAAGTGGAATTCCTAGTGTAGCGGTGAAATGCGTAGAGATTAGGAAGAACACCA  
GTGGCGAAGGCGACTTACTGGACTGTAAGTACGCTGAGGCATGAAAGCGTGGGGAGCAA  
ACAGGATTAGAAACCCAGTAGTCC

>Otu1179

CCAGCCTACGGGGTGCTGCACCAGTAGGGAATATTGGACAATGGGCGCAAGCCTGATCCAGCC  
ATGCCGCGTGAGTGATGAAGGCCTTCGGGTGTAAAGCTCTTTTCTGAGGGAAGAACAAC  
CGGAACAGGAAATGGTTCGGGTCTGACGGTACCTCAGGAATAAGGGACGGCTAACTCCGT  
GCCAGCAGCCGCGGTAATACGGAGGTCCCGAGCGTTGTTTCGGAATTACTGGGCGTAAAGG  
GAGCGCAGGCGGACAGGTCAAGTGAAGTGGAAATCCGGGGCTCAACCTCGGACTTGCTT  
CGGATACTGCCTGTCTTGAGTTCGTGAGAGGAAGATGGAATTCAGGGTGTAGCGGTGAAA  
TGCTCAGATATCCTGAGGAACACCGGTGGCGAAAGCGGTCTTCTGGCGCGAAACTGACGC  
TGAGGCTCGAAAGCGTGGGGAGCAAACGGGATTAGATAACCCAGTAGTCC

>Otu1180

CCAGCCTACGGGGTGCTGCAGTGAGGAATATTGGACAATGGGGGAAACCCTGATCCAGCC  
ATGCCGCGTGAGTGATGAAGGCCTTCGGGTGTAAACTCTTTTAGATGTGACGATGATG  
ACGGTAACATCAGAAAAAGCTCCGGCTAACTTCGTGCCAGCAGCCGCGGTAATACGAAGG  
GAGCGAGCGTTGTTTCGGAATCACTGGGCTTAAAGCGTGCGTAGGCGGATTGGTAAGTAAG

AAGTGAATCCCAGGGCTTAACCCTGGAAGTGCCTTTTACTGCTGTCTGGAATTCGG  
TAGAGGTTGGTGGAAGTCTAGTGTAGAGGTGAAATTCGCAGATGTTAGGAAGAACACCG  
GTGGCGAAGGCGACCAACTGGACCGATATTGACGCTGAGGCACGAAAGCGTGGGTAGCAA  
ACAGGATTAGATACCCCGTAGTCC

>Otu1182

CCAGCCTATGGGGGGCAGCAGTAAGGAATATTGGACAATGGACGCAAGTCTGATCCAGCC  
ATGCCGCGTGAAGGATTAAGGCCCTCTGGGTTGTAACTTCTTTTATAGGGGACGAAAAA  
GGGATTTTCTAATCCAAGTACGCGTACCCTATGAATAAGCACCGGCTAACTCCGTGCCAG  
CAGCCGCGTAATACGAGGGTGCAAGCGTTATCCGGATTCAGTGGGTTTAAAGGGTGCG  
TAGGCGGGCAATTAAGTCAGTGGTGAATCTTGGGGCTCAACCCCGGAAGTCCATTGAT  
ACTATTTGTCTTGAATACTGTGGAGGTTAGCGGAATATGTCATGTAGCGGTGAAATGCTT  
AGATATGACATAGAACACCGATTGTGAAGGCAGCTGGCTACACAAGCATTGACGCTGAGG  
CACGAAAGCGTGGGGATCAACAGGATTAGATACCCCGTAGTCC

>Otu1183

CCAGCCTACGGGAGGCAGCAGTGGGAATCTTGCGCAATGGGCGAAAGCCTGACGCAGCC  
ACGCCGCGTGAGTGAAGAAGGCCCTTCGGGTTGTAAAGCTCTGTGCGGCAGGACGAAAACT  
TATGAGGTTAACAGCCTCATGAATTGACGGTACCGCCAAAGGAAGCACCGGCTAACTTCG  
TGCCAGCAGCCGCGTAATACGAGGGGTGCAAGCGTTGCTCGGAATTATTGGGCGTAAAG  
GGTAGGTAGGTGGTCTGATTTGTCTGGGGTGAAAGCCTTGAGCTTAAGTCAAGAAGTGCC  
TCAGAAACGGTCAGACTGGAATCTTGGAGAGGGTCGTGGAATTCGGGTGTAGCGGTGAA  
ATGCGTAGAGATCGGGAGGAACACCGAGGCGAAGGCGGCGACCTGGACAAGTATTGACA  
CTCAACTACGAAAGCGTGGGTAGCAACAGGATTAGATACCCCTGGTAGTCC

>Otu1185

CCAGCCTACGGGTGGCACCAGTGAGGAATCTTGCGCAATGGGGGCAACCCTGACGCAGCA  
ACGCCGCGTGAGTGAAGAAGGCCCTTCGGGTCGTAAAGCTCTGTGCGGTGGGAAGAAATGT  
ATGCAAGCTAATACCTTGTATACTTGACGGTACCGCCAAAGGAAGCACCGGCTAACTCCG  
TGCCAGCAGCCGCGTAATACGGGGGGTGCAAGCGTTGTTTCGGAATTATTGGGCGTAAAG  
AGCGTGTAGGCGGCGGGATAAGTCAGATGTGAAAGCCCTGGGCTCAACTCAGGAAGTGCA  
TTTGATACTGTTTCGCTTGAGTACTGGAGAGGGAAGAGGAATTCCTGGTGTAGAGGTGAA  
ATTCGTAGATATCAGGAGGAACACCGGTGGCGAAGGCGACTTCCTGGCCAGATACTGACG  
CTGAGACGCGAGAGCGTGGGGAGCAACAGGATTAGATACCCGAGTAGTCC

>Otu1186

CCAGCCTACGGGAGGCACCAGTAACGAATCTTCCCAATGCACGAAAGTGTGAGGGAGCG  
ACGCTGCGTGAGGATGAAGTCCTTCGGGATGTAACTCCTGTGCGGAGCTACCAAGTTC  
TGAGGAGCTCCAAAGGAAGAGGCGGCTAACTCTGTGCCAGCAGCCGCGTAAGACAGAGG  
CCTCGAGCGTTAGGCGGAATCACTGGGCTTAAAGCGTGTGTAGGTGGATTCTTAAGTGCT  
TTGTGAAATCCCACGGCTTAACCGTGGAAGTGCCTTGGCATACTGGGAATCTTGAGCTATC  
TAGGGGCAACTGGAACAGGCGGTGGAGCGGTGAAATGCGTAGATATCGTCTGGAACGCCA  
ATGGTGAAGACAGGTTGCTGGGGATATGCTGACACTGAGACACGAAAGCCAGGGGAGCAA  
ACGGGATTAGATACCCGCGTAGTCC

>Otu1187

CCAGCCTACGGGGGGCTGCAGTCGAGAATCTTCCGCAATGGGCGAAAGCCTGACGGAGCG  
ACGTCGCGTGATGGATGAAGTTCTTCGGAACGTAAACATCTTTTATTAGGGAGAAATCCG  
CCGCAAGGCGGAGTGATAGTACTTAATGAATAAGGGGTTGCTAACTCGTGCCAGCAGCA  
GCGTAATACGAGTGCCCCAAGCGTTATCCGGAATTACTGGGCGTAAAGCGTGCGTAGGC  
GGTGTGATTAGTCGTCCGTTAAAGCTCCCGCTTAACCGGAAAGGCGAACGAAACGGT  
CACGCTGGAGGAGGTGAGGGGTCTATGGAACCTCATGGTGTAGGGGTGAAATCCGTTGATA  
TCATGGGGAACACCAAAGCGAAGGCAGTAGACTGGCACCTTACTGACGCTGTAACACGA  
AAGCGTGGGGATCAACGGGATTAGATACCCCTCGTAGTCC

>Otu1188

CCAGCCTACGGGATGCTGCAGTGAGGAATATTGCGCAATGTCCGAAAGGGTGACGCAGCG  
ACGCCGCGTGAGGATGAAGGCCCTATGGGTCGTAACTCCTTTTGAGGGGGAAGAATAG  
CCTCGTATAGCGAGGTTTGACGGTACCTCTAGAAAAAGCACCGGCCAACTACGTGCCAGC  
AGCCGCGGTAATACGTAGGGTGCAAGCGTTGTCCGGAATTACTGGGTGTAAAGGGAGCGC  
AGGCGGGTTAGCAAGTCGTTGGTGAATTTCTGAGGCTCAACCTCAGAACTGCCAATGATA  
CTGCTGATCTTGAGTACAGAAAGGAAGACGGAATTCCTGGTGTAGCGGTGAAATGCGTA  
GATATCAGGAAGAACACCGGTGGCGAAGGCGGTCTTCTGGTCTGTAAGTACGCTCATGC  
GCGAAAGCGTGGGGAGCAACAGGATTAGATACCCCTGTAGTCC

>Otu1190

CCAGCCTATGGGGTGCAGCAGTGGGGAATTTTCCGCAATGGGCGAAAGCCTGACGGAGCA  
AGACCGCGTGAGGGAGGAAGGCTCTTGGGTTGTAAACCTCTTTTCTCAAGGAAGAAGAAA  
GTGACGGTACTTGAGGAATCAGCATCGGCTAACTCCGTGCCGGCAGCCGCGGTAATACGG  
AGGATGCAAGCGTTATCCGGAATTATTGGGCGTAAAGCGTCCGTAGGTGGCCATTCAAGT  
CTGCCGTTAAACCAGTGGCTTAACCACTGACAGGCGGTGGAACTGAAGAGCTAGAGTG  
TGGTAGGGGTAGAGGGAATTTCCAGTGTAGCGGTGAAATGCGTAGAGATTGGGAAGAACA  
CCGGTGGCGAAAGCGCTCTGCTGGACCACAACCTGACACTCACAGGACGAAAGCTAGGGGA  
GCGAAAGGGATTAGAAACCCGCGTAGTCC

>Otu1191

CCAGCCTACGGGGGGCAGCAGTAAGGGATATTGCGCAATGGGCGAAAGCCTGACGCAGCA  
ACGCCGCGTGAGGATGAAGGCTTTCGGGTTGTAACTCCTTTTGACGCTGACGAGGAAG  
GACGGTAGGCGTCGAAGAAGTCACGGCTAACTACGTGCCAGCAGCCGCGGTAAAACGTAG  
GTGGCAAGCGTTATCCGGATTTACTGGGCGTAAAGCGTGTGCAGAGGGATGACTAAGTGG  
TGTATGAAAGCGCCAGGCTCAACCTGGCAGGGTTATGCCAGACTGGTTCGTCTAGAAACGG  
AGAGAGGGACGTGGAATGCCGGGTGTAGTGGTGAAATGCGTAGAGATCCGGCAGAACAAC  
AGAGGCGAAGGCGGCGTCTCGCTCCGATTTGACCTTCAGACACGACAGCATGGGGAGCG  
AACGGGATTAGAAACCCTAGTAGTCC

>Otu1192

CCAGCCTATGGGGGGCAGCAGTTTCGAATTATTCCCAATGGGCGCAAGCCTGAGGGTGCA  
ATACCGCGTGAGGATGAAGGTCTTCGGATCGTAACTCCTGTCGTAAAGGGACAAAACCA  
CCTATTTTAATAGAATAGGTGCTGATTTAACTTTAAGAGGAAGAGGTGGCTAACTCTGTG  
CCAGCAGCCGCGGTGATACAGAGACCTCAAGCGTTACTCGGATTCACTGGGCGTAAAGGG  
TACGTAGGTGGCATGGTGTGTGGATGTGAAATTCCGGAGCTTAACTCCGGCGCTGCGTC  
CAAACTATCGTGCTAGAGTACTGTAGAGATGAGCGGAATTTCTAGTGTAGCGGTAAAT  
GCGTAGATATTAGAAAGAACACCAACGGCGAAGGCAGCTCATTGGGCAGTTACTGACACT  
GAGGTACGAAAGCGTGGGGAGCAAAAAGGATTAGATACCCCAGTAGTCC

>Otu1195

CCAGCCTACGGGGTGCTGCAGTCGAGGATCATTCGCAATGGGCGAAAGCCTGACGATGCG  
ACGCTGCGTGAGGATGAAGGCCTTCGGGTTGTAACTCCTGTCATGAGGGGAAAAGGTG  
CCGGGCGTGAATAACGTCTGGCCTCGATGGTACCTCAAGAGGAAGCCACGGCCAACCTCTG  
TGCCAGCAGCCGCGGTAATACAGAGGTGGCGAGCGTTGTTTCGGATTTACTGGGCGTAAAG  
GGCGCGTAGGCGGTTATGTACGTCGAGTGTGAAATCTCTGGGCTCAACCCGAAAGTGCG  
CTCGAACTGCATGACTTGAGCATGGAATGGGAGAGCGGAATACACGGTGTAGCGGTGAA  
ATGCGTTGATATCGTGTAGAACACCGGTGGCGAAGGCGGCTCTCTGGAACATTGCTGACG  
CTGAGGCGCGAAAGTTGGGGGAGCAAAACAGGATTAGATACCCTCGTAGTCC

>Otu1197

CCAGCCTATGGGGTGCACCAGTGGGGAATCTTGCGCAATGGACGAAAGTCTGACGCAGCG  
ACGCCGCGTGGGTGAAGAAGGCCTTCGGGTTGTAAAGCCCTGTCGAGTGGGAAAAACGAG  
GGATGGAATAATACGTCATCTCAGTGATTGTACCACTAGAGGAAGCACCGGCTAACTCCG  
TGCCAGCAGCCGCGGTAATACGGAGGGTGAAGCGTTGTTTCGGAATTATTGGGCGTAAAG  
GGCAGGTAGGTGGTCTAGTAAGTCTACTGTGAAATCCCTGAGCTTAACTCAGGAAGTGCG  
GTAGATACTGCAAGACTAGAGTATCGGAGGGGTGCGTGGAATTTCCGGTGTAGCGGTGAA  
ATGCGTAGATATCGGGAGGAACACCAGGGGCGAAGGCGGCGCACTTGACGAAAACCTGACA  
CTCAACTGCGAAAGCGTGGGGAGCAAAACAGGATTAGATACCCCGTAGTCC

>Otu1200

CCAGCCTATGGGGTGCAGCAGTCGAGAATTTTTCACAATGGGCGCAAGCCTGATGGAGCG  
ACGCCGCGTGGGGATGAATGGCTTCGGCCCGTAAACCCCTGTCATTTGCGACCAATGCT  
GCCGGGTGAATATCCCGGCAGTTGATAGTAGCGAAAGAGGAAGGGACGGCTAACTCTGTG  
CCAGCAGCCGCGGTAATACAGAGGTCCCAGCGTTGTTTCGGATTTACTGGGCGTAAAGGG  
TGCGTAGGCGGCAGGGTAAGTTTGATGTGAAATCTCCGGGCCCCAACCCGAAACGGCATT  
GAATACTGCCTTGCTTGAGGGTTGAAGAGGAGACTGGAATTCTCGGTGTAGCAGTGAAAT  
GCGTAGATATCGAGAGGAACACCAGCGGCGAAGGCGAGTCTCTGGGCAACCACTGACGCT  
GAGGCACGAAAGCTAGGGGAGCAAAACAGGATTAGAGACCCTTGTAGTCC

>Otu1201

CCAGCCTACGGGTGGCTGCAGTGAGGAATATTGGTCAATGGGCGGAAGCCTGAACCAGCC  
ATCCCGCGTGCGAGGAAGAAGGCCCTATGGGTTGTAACTGTTTTTCTGAGGGAATAAAAC  
CCCCGACGTGTCGGGGCTTGTTAGGTACTTCAGGAATAAGCATCGGCTAACTCCGTGCCAG

CAGCCGCGGTAATACGGAGGATGCGAGCGTTATCCGGATTTCATTGGGTTTAAAGGGTGCG  
TAGGCGGACTAATAAGTCAGTGGTGAAATTTCTGCAGCTTAACTGTAGACGTGCCATTGAT  
ACTGTTAGACTTGAGTATGGTCAAGGTAGGCGGAATGTGTAATGTAGCGGTGAAATGCTT  
AGATATTACACAGAACACCGATTGCGAAGGCAGCTTGCTGGGCCATTACTGACGCTGATG  
CACGAAAGCGTGGGGAGCAAACAGGATTAGAGACCCCCGGTAGTCC

>Otu1202

CCAGCCTACGGGGGGCAGCAGTGGGGAATATTGGACAATGGACGCAAGTCTGATCCAGCG  
ACACCGCGCGGAGGATGAAGGTCTTCGGATCGTAAACTCCTCTCGGAGATGATAAAGTCT  
TGGTGAACCCCAAGATTGACGGTAATCTCAGAAGAAGTCACGGCTAACTACGTGCCAGCAG  
CCGCGGTAATACGTAGGTGGCGAGCGTTACTCGGAATTACTAGGTGTAAAGCGCGAGTAG  
GTGGTTCGGTAAGTTGGGAGTTAAAGCTCCAATAGAATTGGAGAGGTCTTCTAATACTGC  
CGAACTTGAGTGTAGCATGGGGAAGTGGAAATCCCGGTGTAGCGGTGAAATGCGTAAATA  
TCGGGAGGAATACCTATGGCGAAGGCGAGTTCTCGGGCTACTACTGACACTGAGCAGCGA  
AGACGTGGGGAGCAAACAGGATTAGAGACCCCCGGTAGTCC

>Otu1204

CCAGCCTACGGGGTGCTGCAGTAGAGCTCGATCAGTTCAGTCGCGTATTGGCCGCTGTCTG  
AGTTTGGGCGGCGTGGAACGTCCATATCGCCGAACTGGCTGCCGTCGACGCCTACGAAG  
GCGTAGGCATAAGAGCCCATTTGGGCTGTTGAGCGTGCGTGGGCCGCCCATGGTCAGAGCT  
TGAAAGTCGGCGAAGCTGCCGGTGTGATCGCGTTACGAAAGGCGTTGAAAGCGGGGATG  
TTTACCTTGCCCGGCGAATCTTGCAGGATGCACTTCGAGTAGGTGCCGCATTTGTCTGGCG  
AGGTTTTCTGTCGCCGTTGGGCGTGTGAGTCACCGGCGGGATGAGAGCGTCGCGGGTGGCG  
GCGTTGAATCGGCGGGCGAAGCAGTTTCAGCACGCGAGGATCGGTCACGGTGGACGGCACG  
CATGTTTGCGGGGGCTGGGTTGAGCATGGGCTTGGCATTAGAAACCCCTTGTAGTCC

>Otu1205

CCAGCCTACGGGACGCTGCAGTCGAGAATATTCCACAATGGACGAAAGTCTGATGGAGCG  
ACGCCGCGTGCAAGGATGAAGGCCTTCGGGTTGTAAACTGCGGTAGTATGGTAACAATGCA  
AATGAGTGCCATACGGAAAGAGGTGGGTAACCTACGTGCCAGCACCAGCGGTAAAACGTAG  
ACCTCGAGCGTTATTCGGATTTATTGGGCGTAAAGCGCGTGTAGGGGGTTTTGTACGTCT  
TTTGTTAAAGCCCACCGCTCAACGGTGGAAAGTGCAGGAGATACGGCAAGACTAGAGGATG  
TTAGAGGTGCCAGGAACACACGGTGTAGGGGTGAAATCCGTTGATATCGTGTGGAACACC  
AAAGGCGAAGGCAAGGCACTGGGACACTCCTGACCCTGAGACGCGAAAGCGTGGGGAGCA  
AACAGGATTAGATACCCAGTAGTCC

>Otu1206

CCAGCCTATGGGGTGCAACAGTGGGGAATTTTCCGCAATGGGCGAAAGCCTGACGGAGCG  
ACGCCGCGTGAGGATGAAGGATTTCCGTCTGTAAACTCCTGTCAGGGGGGACGATAATG  
ACGGTACCCCCAAAGGAAGCATCGGCTAACTACGTGCCAGCAGCCGCGGTAAGACGTAGG  
ATGCGAGCGTTGTTCCGAATTATTGGGCGTAAAGCGTGCGTAGGCGGCTTGTTAAGTCTG  
GTGTTAAAGCTAGGGGCTCAACCCCTGTGTTGCACTGGAAACTGGCAGGCTTGAGTGC GG  
TAGGGGAAGGTGGAATTCGAGTGTAGCGGTGAAATGCGTAGATATTCCGAAGAACACCG  
GTGGCGAAGGCGACCTTCTGGGCCGCCACTGACGCTGAGGCACGAAAGCGTGGGGAGCAA  
ACGGGATTAGAAACCCCTTGTAGTCC

>Otu1207

CCAGCCTATGGGGGGCAGCAGTGGGGAATTTTACGCAATGGGCGAAAGCCTGACGTAGCG  
ACACCGCGTGAGCGAAGAAGCCCTTTGGGGTGTAAGCTCTGTCAGCAGGGACGAAACAA  
ATGACGGTACCTGCAGAGGAAGCATCGGCTAACTACGTGCCAACAGCCGCGGTAAGACGT  
AGGATGCAAGCGTTGTCCGGATTTATTGGGCGTAAAGAGTTCGTAGGTGTTTTGTTAAGT  
CCGGTGTTAAAGATCAGGGCTCAACCCCTGGGACCGCACTGGATACTGGCAGACTGGAGTG  
CAGTAGAGGCGAGTGGAATTCAGTGTAGCGGTGAAATGCGTAGATATTGGGAAGAACA  
CCGGTGGCGTAAGCGACTCGCTGGGCTGTAACTGACACTGAGGAACGAAAGCCAGGGGAG  
CGAATGGGATTAGAAACCCCGTAGTCC

>Otu1208

TCAGCCTATGGGGGGCAGCAGTAGGGAATATTGGTAATCTGCGAAAGCGGGAACCAGCAA  
CGCCGCGTGTGCGATGAAGGCCTTCGGGTGTAAAGCACTTTTGGAGGGATGAGGTAGG  
ACAGTACCTTCAGAATAAGTCTCGGCTAACTACGTGCCAGCAGCCGCGGTAACACGTAGG  
AGACAAGCGTTATCCGGATTTACTGGGCGTAAAGCGCATGCAGGCGGTTGAATAAGTTGG  
ATGTGAAAGCTCCCGGCTTAACTGGGAGAGGTGCTTCAATACTGTTTAACTAGAGGATGG  
AAGAGGAAGGTGGAATTCGGGTGTAGTGGTGAAATGCGTAGATATCCGGAGGAACACCA  
GTGGCGAAAGCGACCTTCTGGTCCATAACTGACGCTCATATGCGAAAGCTAGGGTAGCAA

ACGGGATTAGAAACCCCTTGTAGTCC

>Otu1210

CCAGCCTATGGGGGGCAGCAGTGGGGAATCTTGCGCAATGGGCGAAAGCCTGACGCAGCC  
ATGCCGCGTGAATGATGAAGGTCTTAGGATTGTAAAATTCTTTTAGCAGGGACGATAATG  
ACGGTACCTGCAGAAAAAGCCCCGGCTAACTTCGTGCCAGCAGCCGCGGTAATACGAAGG  
GGGCTAGCGTTGCTCGGAATTACTGGGCGTAAAGGGAGCGTAGGCGGGTTATCAAGTTGG  
AGGTGAAAGCCCAGGGCTCAACCTTGGAATTGCCTTCAAAACTGATAGCCTAGAGTATGG  
AAGAGGTAAGTGGAACCTCCGAGTGTAGAGGTGAAATTCGTAGATATTCGGAAGAACACCA  
GTGGCGAAGGCGACTTACTGGTCCATGACTGACGCTGAGGCTTGAAAGCTAGGGTAGCGA  
ACGGGATTAGAGACCCGAGTAGTCC

>Otu1211

CCAGCCTATGGGTGGCAGCAGTTAGGGAACTTTTCCAATGCGCGCAAGCGTGAGAGAGCA  
AGTCAGAGTGATTTTGATATATTTTCAAGATCTTTTGCCGAATGTAAAAAGTTCGGAGAA  
TAAGGACTGGGCAAGACTGGTGCCAGCCGCCGCGTAATCCCAGCGGTCCGAGTCGCATC  
CACAATTATTGGGTCTAAAACATTTCGTAGCTTGTTTGTTAAGTTCCTTGTGAAATCTTAA  
ATCTTAAATTTAAGGCGTGCAGGGAATACTGGCAAACCTTGAGACCGGAAGAAGTAAAGAG  
TATAGCCGAGGTAGTGGTAAAATACGTTAATCTCGGTTAGACTAACAACAGCGAAGGCAC  
TTTACTAGTACGGATCTGACAGTGAGGAATGAAGGCTAGGGTCGCGAAAGGGATTAGAAA  
CCCTAGTAGTCC

>Otu1212

CCAGCCTACGGGAGGCTCCAGTGGGGAATCTTGCGCAATGGGCGAAAGCCTGACGCAGCG  
ACGCCGCGTGTGCGATGAAGGTCTTCGGATCGTAAAGCACTGTCGCGGGGGAAAAAGCAA  
TGATGGTACCCCGAGAGGAAGCACCGGCTAACTCTGTGCCAGCAGCCGCGGTAATACAGA  
GGGTGCGAGCGTTGTTTCGAATTATTGGGCGTAAAGCGCTGGTAGGTGGCTTGTTAAGTC  
GCGTGTGAAAGCTTCCGGCTCAACCGGAAAAGTGCGCGCGAAACTGGTGAGCTTGAGTAT  
GGGAGAGGGTCGCGGAATTCCCGGTGTAGAGGTGAAATTCGTAGATATCGGGAGGAACAC  
CAGAGGCGAAGGCGGCGACCTGGAACATCACTGACACTGAGCAGCGAAAGCGTGGGGAGC  
AAACAGGATTAGAAACCCCCGTAGTCC

>Otu1218

CCAGCCTACGGGTGGCTGCAGTGGGGAATCTTGGAACAATGGGCGCAAGCCTGATCCAGCC  
ATGCCGCGTGAGTGAAGAAGGCCTTAGGGTTGTAAAACCTCTTTCGCCGGTGAAGATAATG  
ACGGTAACCGGAGAAGAAGCCCCGGCTAACTTCGTGCCAGCAGCCGCGGTAATACGAAGG  
GGGCTAGCGTTGTTTCGAATTACTGGGCGTAAAGCGCACGTAGGCGGATTGGTAAGTAGG  
GGGTGAAATCCCCGGGCTCAACCCGGGAACTGCCTTCTAGACTGCCAGTCTTGAGGTCAG  
GAGAGGCGAGTGGAATTCGAGTGTAGAGGTGAAATTCGTAGATATTCGGAGGAACACCA  
GTGGCGAAGGCGACTCGCTGGACTGATACTGACGCTGAGGTGCGAAAGCGTGGGGAGCAA  
ACAGGATTAGAAACCCCAGTAGTCC

>Otu1220

CCAGCCTACGGGGGGCAGCAGTCGAGAATCTTCGGCAATGGGCGAAAGCCTGACCGAGCG  
ACGCCGCGTGCGGGATGAAGGCCTTCGGGTGTAAACCGCTGTCGGTGGGGAGGAAATAC  
TGGGGGGTTCTCCCTTCAGTTTGACCTATCCGCAGAGGAAGTACGGGCTAAGTTTCGTGCC  
AGCAGCCGCGGTAACACGAACCGTACGAACGTTATTTCGAATCACTGGGCTTAAAGGGTG  
CGTAGGCGGCCTGGTAAGTTGGGTGTGAAATCCCTCGGCTTAACCGAGGAATTGCGCTCA  
AGACTGCCAGGCTCGAGGGAGTCAGAGGTGAGCGGAACTTAGGGTGGAGCGGTGAAATGC  
GTTGATATCCTAAGGAACACCAGGGGCGAAAGCGGCTCACTGGGACTCTTCTGACGCTGA  
GGCACGAAAGCTAGGGGAGCGAACGGGATTAGAAACCCCCGTAGTCC

>Otu1221

CCAGCCTATGGGTTGCAGCAGTAGGGAATATTGGACAATGGGTGAGAGCCTGATCCAGCC  
ATGCCGCGTGCAAGAACGCGCTTCTGGGTTGTAAACTGCTTTAGCCTGGGGATAAAAC  
GACCATGCGTGGTTAATTGAAGGTACCAGGATAATAAGCCACGGCTAACTACGTGCCAGC  
AGCCGCGGTAATACGTAGGTGGCAAGCGTTGTCCGATTTATTGGGTTTAAAGGGTGCGT  
AGGCGGTTTTATAAGTCAGTGGTGAATAACGGCAGCTTAACTGTGAGGTGCCATTGATA  
CTGTAGAACTTGAGTACAGACGAGGTAGGCGGAATTGACGGTGTAGCGGTGAAATGCTTA  
GATATCGTCAAGAACACCGATAGCGAAGGCAGCTTACTAGACTGTAAGTACGCTGAGGC  
ACGAAAGTGTGGGGATCAAACAGGATTAGAAACCCCAGTAGTCC

>Otu1222

CCAGCCTACGGGATGCTGCAGTGAGGAATATTGCGCAATGTCCGAAAGGGTGACGCAGCG  
ACGCCGCGTGAGAGATGAAGGCCCTATGGGTGCTAAACTCCTTTTGAGGGGGAAGAATAG

TCCCATATACTGGGATTTGACGGTACCTCTAGAAAAAGCACCGGCTAACTACGTGCCAGC  
AGCCGCGGTAATACGTAGGGTGCAGCGTTGTCCGGAATCACTGGGTGTAAAGGGAGCGC  
AGGCGGGTCGGCAAGTCATTGGTGAAATCCGGAGGCTTAACCTCAGGACTGCCAATGATA  
CTTCCGATCTTGAGTGCAGAAGAGGAAGACGGAATTCCTGGTGTAGCGGTGAAATGCGTA  
GATATCAGGAAGAACACCGGTGGCGAAGGCGGTCTTCTGGTCTGTAAGTACGCTCATGC  
TCGAAAGCGTGGGGAGCAAACAGGATTAGAAACCCTAGTAGTCC

>Otu1223

CCAGCCTATGGGTGGCTGCAGTAGGGAATATTGCGCAATGGAGGCAACTCTGACGCAGCG  
ACGCCGCGTGGGTGATGAAGGCTTTCGGGTCTGTAAGCCCTGTCGGAAGGGAAGAAAAAT  
AGAGTAGCTAATATCTACTTTACTTGACGGTACCTTAAGAGGAAGCACCGGCTAACTACG  
TGCCAGCAGCCGCGGTAATACGTAGGGTGAAGCGTTGTTCGGAATTATTGGGCGTAAAG  
CGCGTGTAGGCGGTTTTCTAAGTCGGATGTGAAATCCCTCGGCTCAACCGGGGAAGTGCA  
TTCGAAACTAGTAAGCTAGAAGATGGTAGAGGAAGGTGGAATTCCTAGTGTAGAGGTGAA  
ATTCGTAGATATTAGGAGGAATACCGGAGGCGAAGGCGGCCTTCTAGACCATTCTTGACG  
CTGAGACGCGAAAGCGTGGGGAGCAAACAGGATTAGAAACCCCGTAGTCC

>Otu1224

CCAGCCTACGGGTGGCTCCAGTGGGGAATATTGGACAATGGGGGCAACCCTGATCCAGCG  
ACGCCGCGTGTGTGAAGAAGGCCTGCGGGTTGTAAAGCACTTTTAGTGGGGATGAAATGT  
GCAGGGTTAATACCTCTGCATTTTGACCTAACCACAGAAAAAGCACCGGCTAACTCTGT  
GCCAGCAGCCGCGGTAATACAGAGGGTGAAGCGTTAATCGGAATTACTGGGCGTAAAGC  
GTGCGCAGGCGGTCCGCTAAGACAGATGTGAAATCCCCGGGCTTAACCTGGGAACTGCAT  
TTGTGACTGGCGGGCTAGAGTATGGCAGAGGGGGGTAGAATTCACGTGTAGCAGTGAAA  
TGCGTAGAGATGTGGAGGAATACCGATGGCGAAGGCAGCCCCCTGGGCCAATACTGACGC  
TCATGCACGAAAGCGTGGGGAGCAAACAGGATTAGATACCCGCGTAGTCC

>Otu1233

CCAGCCTACGGGACGCAGCAGTGGGGAATTTTGCAGCAATGGGGGAAACCCTGACGCAGCA  
ACGCCGCGTGGAGGATGAAGTCCCTTGGGACGTAAACTCCTTTTCTGACTGGGAAGATAATG  
ACGGTACCAGTGGAAGAAGCCCCGGCTAACTTCGTGCCAGCAGCCGCGGTAATACGAAGG  
GGGCTAGCGTTGCTCGGAATCACTGGGCGTAAAGGGTGCCTAGGCGGGTCTTTAAGTCAG  
GGGTGAAATCCTGGAGCTCAACTCCAGAACTGCCTTTGATACTGAGGATCTTGAGTTCGG  
GAGAGGTGAGTGGAAGTGCAGTGTAGAGGTGAAATTCGTAGATATTTCGAAGAACACCA  
GTGGCGAAGGCGGCCAACTGGTCCGATACTGACGCTGAGGTGCGAAAGCGTGAGGAGCAA  
ACAGGATTAGATACTCCGGTAGTCC

>Otu1234

CCAGCCTATGGGTGCTGTCAGTCGGGAAAAATTTTGCAATACACGAAAGTGTGACAGAGCA  
AGCCAGAGTGCTTTTCTTTTGAAGGCTTTTGTGAGATGTAAAAAGTCTTACGAATAAG  
GACTGGGCAAGACTGGTGCCAGCCGCGCGGTAATCCAGCAGTCCAAGTCGCAGCCACA  
TTTGTGGGTCTAAAATATCCGTAGCTTGCTATTCAAGTCTTTTGTGAAATCGGGACTCT  
TAAGGTTCCGGCGGGCAAAGATACTGTTTAGCTAGAGACCGGGAGGTGCAGGAAGTACG  
TTTAGGGTAGCGGTAAAATGCTCTGATCCTAAATGGACTAACAGTCGCGAAGGCGTCCTG  
TAAGAACGGTTCTGACAGTGAGGGATGAAGGCTAGGGGCGCAAAGTGGATTAGAAACCC  
AGTAGTCC

>Otu1236

CCAGCCTACGGGACGCTGCAGTGAGGAATTTTCCGCAATGGGGGAAACCCTGACGGAGCG  
ACGCCGCGTGTGGGAAGAAGGCCTTCGGGTCTGTAACCACTGTCGAGGGGGACGATATTG  
ACGGTACCCCTGGAGGAAGCCCCGGCTAACTACGTGCCAGCAGCCGCGGTAAGACGTAGG  
GGGCAAGCGTTGTCCGGAATTATTGGGCGTAAAGCGCTCGTAGGTGGATCGATAAGTCCG  
CAGAGAAAGACCCGGGCTCAACTCGGGGAACGGTGTGGATACTATTGATCTTGAGGCAAT  
CAGAGGATGATGGAATTCCTGGTGTAGCGGTGAAATGCGTAGATATCGGGAGGAACACCA  
GTGGCGAAGGCGATCATCTGGGGTTGTTCTGACACTGAGGAGCGAAAGCTAGGGGAGCAA  
ACGGGATTAGAAACCCGGGTAGTCC

>Otu1238

CCAGCCTACGGGTCGCTGCAGTCGAGAATCTTTCACAATGGGGGCAACCCTGATGGAGCG  
ACGCCGCGTGGAGGATAAGGTCTTCGGATTGTAAACTCCTGTCATGCGAGAGCAAGGCAT  
AGCAATATGTTTGATAGTATCGCAAGAGGAAGAGACGGCTAACTCTGTGCCAGCAGCCGC  
GGTAATACAGAGGTCTCAAGCGTTGTTTCGGAATCACTGGGCGTAAAGGGTGCCTAGGCTG  
CGGAGTAAGTCGGGTGTGAAATTTGAGGGCTCAACCCTCAACTAGCACCTGATACTGCTT  
CGCTAGAGACCTGGAGAGGAGTTTGAATTCCTCGGTGTAGCAGTGAATGCGTAGATTTT

GAGAAGAACGCTCGCAGCGAAAGCGAAACTCTGGACAGCGTCTGACGCTGAGGCACGAAG  
GCTAGGGGAGCAAACGGGATTAGATACCCCTCGTAGTCC

>Otu1240

CCAGCCTATGGGGGGCTGCAGTAGGGAATATTGCACAATGGAGGAACTCTGATGCAGCG  
ACGCCGCGTGAGTGATGAAGGCCTTCGGGTCGTAAAGCTCTGTGCAAGGGAATAACACA  
ATGAATGTACCTTGCAAGAAAGGATCGGCTAACTTCGTGCCAGCAGCCGCGGTAAGACGA  
GGGATCCTAGCGTTGTTTCGGAATTATTGGGCGTAAAGCGGGTGTAGGTGGCCATGTAAGT  
CAGATGTGAAAGCCCAGGGCTTAACCCTGGAAGTGCATTTGATACTGCGTGGCTTGAGTG  
TAAGAGAGGATAGTAGAATTCCTGGTGTAGTGGTGAAATACGTAGATATCAGGAGGAATA  
CCGGCGGCGAAGGCGGCTATCTGGCTTAACACTGACACTCAGACCCGAAAGCGTGGGGAT  
CAAACAGGATTAGAAACCCCTCGTAGTCC

>Otu1243

CCAGCCTATGGGGGGCTCCAGTCGAGAATTTTTTACAATGGGGGCAACCCTGATGGAGCG  
ACGCCGCGTGAGGATGAAGGTCTTCGGATTGTAAACTCCTGTCAAACGGGAACAAGAAA  
GTGATAGTACCGTTAGAGGAAGAGACGGCTAACTCTGTGCCAGCAGCCGCGGTAATACAG  
AGGTCTCAAGCGTTGTTTCGGATTTCATTGGGCGTAAAGGGTGCGCAGGCTGTGAGGTAAAGT  
CGGGTGTGAAATTTTCGGGGCTCAACCCCTAAACTGCATTCGATACTGCTTCGCTAGAGGA  
CTGTAGAGGAGATTGGAATTCACGGTGTAGCAGTGAAATGCGTAGATATCGTGAGGAAGA  
CCAGTGGCGAAGGCGAATCTCTGGGCAGTTCTTGACGCTCATGCACGAAGGCCAGGGGAG  
CAAACGGGATTAGAAACCCCGGTAGTCC

>Otu1244

CCAGCCTATGGGAGGCTCCAGTGGGGAATTTTGGACAATGGGGGCAACCCTGATCCAGCG  
ACGCCGCGTGAGGATGAAGGTCTTCGGATCGTAAACTTCTTTTAGAGGGGATGAATGAG  
TTAGTGAATAGCTAACTGTGACAGTACTCTTTGAATAAGCCACGGCTAACTGCGTGCCAG  
CAGCCGCGGTAATACGTAGGTGGCAAGCGTTACTCGGAATTACTAGGCGTAAAGCGCAGG  
TAGGCGGTTGGATAAGTTTCTTGTGAAAGCTCCCGGCTTAACTGGGAGAGGCCAAGGAAT  
ACTATCCGACTTGAGTATGGTAGGGGTAAGTGGAAATCCCGGTGTAGCGGTGAAATGCGT  
AGATATCGGGAGGAATACCTATGGCGAAGGCAGGTTACTGGGCCATTACTGACGCTGAGC  
TGCGAAAGCTAGGGGAGCAAAAAGGATTAGATACCCGCGTAGTCC

>Otu1246

CCAGCCTACGGGTTGCAGCAGTGGGGAATATTGCGCAATGGGCGAAAGCCTGACGCAGCA  
ACGCCGCGTGAGTGATGAAGGTCTTCGGATCGTAAAGCTCTGTGCGCAGGAACGATGGGC  
TCGTTGGCTAACATCCAACGGGTTTGACGGTACCTGCAAAGGAAGCACCGGCTAACTCTG  
TGCCAGCAGCCGCGGTAAGACAGAGGGTGCAAGCGTTGTTTCGGAATACTGGGCGTAAAG  
CGCGCGTAGGCGGCTTTTCAAGTCGGGTGTGAAATCCCACGGCCTAACCGTGGAAGTGCA  
TTCGATACTGAGAGGCTTGAGTCCTGGAGAGGGTGGTGGAATTCCCAGTGTAGAGGTGAA  
ATTCGTAGATATTGGGAGGAACACCGGTGGCGAAGGCGACCACCTGGACAGAGACTGACG  
CTGAGGTGCGAAAGCGTGGGGAGCAAACAGGATTAGAAACCCAGTAGTCC

>Otu1248

CCAGCCTACGGGTCGCAGCAGTGGGGAATATTGGACAATGGGCGCAAGCCTGATCCAGCC  
ATGCCGCGTGAGTGATGAAGGCCTTAGGGTTGTAAAGCTCTTTTGCCAGGGAAGATGATG  
ACGGTACCTGGAGAATAAGCACCGGCTAACTTCGTGCCAGCAGCCGCGGTAATACGAAGG  
GTGCTAGCGTTGTTTCGGAATTACTGGGCGTAAAGCGCGCGTAGGCGGCTTGTCAAGTCAG  
GGGTGAAATCCCACAGCTTAACTGTGGAAGTGCCTTTGAAACTGTCAAGCTTGAGTGTG  
GAGGGGATAGCGGAATTGCTAATGTAGAGGTGAAATTCGTAGATATTAGCAGGAACACCG  
GTGGCGAAGGCGGCTATCTGGACGACAACCTGACGCTGAGGCGCGAAAGCGTGGGGATCAA  
ACAGGATTAGATACCCCTTGTAGTCC

>Otu1250

CCAGCCTATGGGTGGCAGCAGTGGGGAATATTGCGCAATGGGGGAAACCCTGACGCAGCG  
ACGCCGCGTGAGGATGAAGGTCTTCGGATTGTAAACTTCTGTTGAGAGGGAAGAAAAGT  
CTATATTTAAAGATGTAGATGTTGACGGTACCTCTATAGAAAGCCCCGGCTAACTTCGT  
GCCAGCAGCCGCGGTAATACGAAGGGGGCAAGCGTTATTCGGAATAACTGGGCGTAAAGA  
GCGTGTAGGTGGTTCTATAAGTTGATTGTTAAATTTACGGCCTAACCGTGAGCATGCAG  
TCAAACTGTGGGACTAGAGGACAGGAGGGAGGAGTGGAATTCCTCGGAGTAGCGGTAAAA  
TGCGTAGATCTCGAGAGGAACACCGATGGCGAAGGCAGCTCCTTGGCCTGTTTCTGACAC  
TGAAATGCGAAAGCGTGGGGAGCAAACAGGATTAGAAACCCCTTGTAGTCC

>Otu1253

CCAGCCTATGGGTGCAGCAGTAAGGAATATTGGACAATGGGGGCAACCCTGATCCAGCG

ATGCCGCGTGAGTGAAGAAGGCCCTCGGGTCGTAAAGCTCTTTAGGCTGGGAAGAAGGGT  
ATGTGGTGAATAGCCATGTATCTTGACGGTACCGGCAGAATAAGCACCGGCAAACCTCTGT  
GCCAGCAGCCGCGGTAATACAGAGGGTGCGAGCGTTAATCGGAATTACTGGGTGTAAAGG  
GCGCGTAGGCGGCGCGATGTGTGTGATGTGAAAGCCCCGGGCTTAACCTGGGAAGTGCAT  
TGCAAACCTGTCTGCTGGAGTATATGAGAGGGTGGCGGAATTTCCGGTGTAGCGGTGAAA  
TGCGTAGAGATCGGAAGGAACGTTCGATGGCGAAGGCAGCCACCTGGCATAATACTGACGC  
TGAGGCGCGAAAGCGTGGGGAGCGAACAGGATTAGAAACCCGCGTAGTCC

>Otu1255

CCAGCCTACGGGGGGCTGCAGTCGAGAATTTTTTCAACAATGGGCGAAAGCCTGATGGAGCG  
ACGCCGCGTGGGGGATGAATGGCTTCGGCCCGTAAACCCCTGTCATTTGCGAACAAACCT  
ATTCACCTAACACGTGAAGAGCTGATTGTAGCGGAAGAGGAAGGGACGGCTAACTCTGTG  
CCAGCAGCCGCGGTAAGACAGAGGTCCCGAGCGTTGTTCCGATTTCATTGGGCGTAAAGGG  
TGTGTAGGAGGTGGGTAAGTCAGGTGTGAAATCTCAGAGCTTAACCTCTGAAACTGCGCT  
TGATACTGCTCGGCTAGAGGATCGGAGGGGGTATCGGAATTTATGGTGTAGCAGTGAAAT  
GCGTAGATATCATAAGGAACACCGGTGGCGAAGGCGGATACCTGGAAGATTCCTGACTCT  
GAAACACGAAAGCCAGGGGAGCAAACGGGATTAGATACCCGCGTAGTCC

>Otu1257

CCAGCCTATGGGGTGCAGCAGTGAGGAATTTTTCGCAATGGACGAAGGTCTGACGCAGCA  
ACGCCGCGTGAGTGATGAAGGTCTTCGGATTGTAAACTCTGTTGAGTGGGAAGAAAAGT  
TCCGGGAATAACACCTCGGGACCTGACGGTACCACTTGAGGAAGCCCCGGCTAACTACGT  
GCCAGCAGCCGCGGTAATACGTAGGGGGCAAGCGTTGTTTCGGAATCACTGGGCGTAAAGG  
GAGCGTAGGCGGAGGAATAAGTTAGGAGTTAATGTACGGGCTTAACCCGTAATCTGCTC  
CTAATACCGTTCTTCTTGAGTATGGGAGAGGGAGATGGAATTCAGGTGTAGCGGTGGAA  
TGCGTAGATATCTGGAAGAACACCAGCTGCGAAGGCGGTCTCCTGGCCCAATACTGACGC  
TGAGGCTCGAAAGCTAGGGGAGCAAACAGGATTAGAAACCCCGTAGTCC

>Otu1259

CCAGCCTACGGGTCGCAGCAGTGGGGAATTTTACACAATGGGGGAAACCCCTGATGTAGCG  
ACACCGCGTGAGCGAAGAAGCCCTTTGGGGTGTAAGCTCTGTGACAGAGGGACGAAAAAA  
ATGACGGTACCTGCAGAGGAAGCATCGGCTAACTACGTGCCAGCAGCCGCGGTAAGACGT  
AGGATGCGAGCGTTGTCCGGATTTATTGGGCGTAAAGAGTTCGTAGGTGGTTCATTAAGT  
CTGGTGTAAAAGACTGGGGCTCAACCCTGGGATGGCACTGGATACTGGTGGACTGGAGTG  
AGGTAGAGGCAAGCGGAATTCCCAGTGATAGCGGTGAAATACGTAGATATTGGGAAGAACA  
CCGGTGGCGCAAGCGGCTTGCTGGGCCTTAACCTGACGCTGAGGAACGAAAGCTAGGGGAG  
CAAATGGGATTAGAAACCCCGCTAGTCC

>Otu1260

CCAGCCTACGGGTCGCAGCAGTGGGGAATTTTCCGCAATGGGCGAAAGCCTGACGGAGCA  
ACGCCGCGTGAGTGATGAAGACCTTCGGGTGTAAAGCTCTGTGCGAGGGGAAGAACACA  
ATGACGGTACCTCCAAGAAAGCCCCGGCTAACTACGTGCCAGCAGCCGCGGTAATACGT  
AGGGGGCGAGCGTTATCCGGATTTACTGGGCGTAAAGCGCGTTAAGGCGGCCGACAAAGT  
TGGTGGTGAATTTTCAGGGCTCAACTCTGAAACTGCCTCCAATACTGGTTGGCTTGAGTG  
CGAGAGAGGAAGGTGGAATTCCCGGTGTAGTAGTGAAATGCGTAGATATCGGGAGGAACA  
CCAGTGGCGAAGGCGGCCTTCTGGCTCGCAACTGACGCTGTAGCGCGAAAGCGTGGGGAG  
CGAACGGGATTAGAAACCCCGTAGTCC

>Otu1261

CCAGCCTACGGGTTGCTCCAGTGGGGAATATTGGACAATGGGGGAAACCCCTGATCCAGCG  
ACGCCGCGTGTTGAAGAAGGCCTGCGGGTTGTAAAGCACTTTTAGTGGGGACAAAAGC  
TACGGATTAATACTCTGTGGTCTTGATTTAACCCAAAGAATAAGCACCGGCTAACTACGT  
GCCAGCAGCCGCGGTAATACGTAGGGTGCAAGCGTTAATCGGAATTACTGGGCGTAAAGC  
GTACGCAGGCGGTTTCGCTAAGACAGATGTGAAATCCCCGGGCTTAACCTGGGAAGTGCAT  
TTGTGACTGGCGGGCTAGAGTATGGCAGAGGGGGGTAGAATTCACGTGTAGCAGTGAAA  
TGCGTAGAGATGTGGAGGAATACCGATGGCGAAGGCAGCCCCCTGGGCCAATACTGACGC  
TCATGCACGAAAGCGTGGGGAGCAAACAGGATTAGAAACCCCGCTAGTCC

>Otu1264

CCAGCCTACGGGTTGCAGCAGTGAGGAATCTTCCGCAATGGGCGAAAGCCTGACGGAGCG  
ACACCGCGTGAGAGGACGAAGGCCTTTTGGTTGTAAACTCCTTTTTTGGAGGGAATAAATGA  
TGAAGTCACCTCAAGAATAAGCACCGGCTAACTACGTGCCAGCAGCTGCGGTAATACGTA  
GGGTGCAAGCGTTATCCGGAATTATTGGGCGTAAAGCGTTTCGAGGCGGTTTTGTAAAGTC  
TGTGGTTAAATCTGGTTCGCTCAACGATCAACATGCCACAAATACTGCAAAGCTAGAGGAT



GGCAGAGGCAACTGGAATTCTGCGTGTAGGGGTAAAATCCGTTGATACGCAGAGGAACAC  
CAAAAGCGAAGGCAGGTTGCTGGGCCATTTCTGACGCTGTTGAACGAAAGCGTGGGTAGC  
AAACAGGATTAGAAACCCCAGTCC

>Otu1266

CCAGCCTATGGGTTGCAGCAGTGGGGAATTTTGTGCAATGGGCGAAAGCCTGACACAGCG  
ACACCGCGTGAGCGACGAAGCCTTTTGGGGTGTAAGCTCTGTCCGCAGGGAAGAAAAA  
ATGACGGTACCTGCAGAGGAAGCATCGGCTAACTACGTGCCAGCAGCCGCGGTAAGACGT  
AGGATGCAAGCGTTGTCCGGATTTATTGGGCGTAAAGAGTTCGTAGGCGGTTTCGTTAAGT  
CTGATGTTAAAGACTGGGGCTCAACCTCGGGAGTGCATTGGATACTGGCGGACTGGAGTA  
CAGTAGAGGCAAGTGAATTTCCAGTGTAGCGGTGAAATGCGTAGATATTGGGAAGAACA  
CCGGTGGCGCAAGCGACTTGCTGGGCTGTAACTGACGCTGAGGAACGAAAGCTAGGGTAG  
CGAATGGGATTAGAGACCCGCGTAGTCC

>Otu1268

CCAGCCTATGGGGCGCTCCAGTGGGGAATATTGGACAATGGGCGCAAGCCTGATCCAGCA  
ATGCCGCGTGTTGAAGAAGGCCTGCGGGTTGTAAAGCACTTTCAGTTGGGAGGAAGGCC  
TTAGCGTGAATATCGCTGAGGATTGACGTTACCAACAGAAGAAGCACCCGGCTAACTCTGT  
GCCAGCAGCCGCGGTAATACAGAGGGTGCAAGCGTTAATCGGAATTACCGGGCGTAAGG  
GCGCGTAGGTGGTTATTTAAGTTAGAGGTGAAATCCCCGGGCTTAACCTGGGAATTGCCT  
ATAAGACTGGATAGCTAGAGTTCGGGAGAGGGAAGTGAATTTCCGGTGTAGCGGTGAAA  
TGCGTAGATATCGGAAGGAACACCAAGTGGCGAAGGCGACTTCCTGGCCCGATACTGACAC  
TGAGGCGCGAAAGCGTGGGGAGCGAACAGGATTAGAAACCCCCGTAGTCC

>Otu1269

CCAGCCTATGGGGTGCAGCAGTCGAGGATCTTCGGCAATGGGCGCAAGCCTGACCGAGCG  
ATGCCGCGTGCGGGATGAAGGCCTTCGGGTGTAAACCGCTGTCAGTGGGGAGGAAATGT  
ACGTGGGTACTCCCACGTATTTGACCTATCCGCAGAGGAAGTGTGGGCTAAGTTTCGTGCC  
AGCAGCCGCGGTAAGACGAACCACACAAACGTTATTCGGAATCACTGGGCTTAAAGGGTG  
CGTAGGCTGCGCAGCAAGTTGGGTGTGAAATCCCTCGGCTCAACCGAGGAACTGCGCCCA  
AACTGCTGTGCTCGAGGGAGATAGAGGTGAGCGGAACTTAGGGTGGAGCGGTGAAATGC  
GTTGATATCCTAAGGAACACCCGTGGAGAAAGCGGCTCACTGGATCTCTTCTGACGCTGA  
GGCACGAAAGCTAGGGTAGCGAACGGGATTAGATACCCCCAGTAGTCC

>Otu1272

CCAGCCTACGGGTCGCTCCAGGCGCGAAAACTTTACAATGCTGGAAACAGCGATAAGGGG  
ACCTCGAGTGCCAGGTTACAAATCTGGCTGTCGTGATGCCTAAAAAGCATTGCATAGCAA  
GGGCCGGGCAAGACCGGTGCCAGCCGCCGCGGTAACACCGGCGGCTCGAGTGGTAACCGT  
TATTATTGGGTCTAAAGGGTCTGTAGCCGCCGGATAAGTCTCTTGGTAAATCTGGCAGC  
TTAACTGTCAAGCTTTCAGGAGATACTGTCTGGCTCGAGGCCGGGAGAGGTGAGAGGTAC  
TTCAGGGGTAGGGGTGAAATCTTGTAATCCTTGAAGGACCACCAGTGGCGAAGGCGTCTC  
ACCAGAACGGGCTGACGGCAAGGGACGAAAGCTAGGGGCACGAACCGGATTAGAAACCC  
GAGTAGTCC

>Otu1274

CCAGCCTATGGGACGCACCAGTGGGGAATATTGCGCAATGGGCGAAAGCCTGACGCAGCG  
ACGCCGCGTGGGTGATGAAGGCCTTCGGGTGTAAAGCCCTGTGGGGGGAGAAGAATAAG  
TCGGTGTAAATATCCCGATGATGACGGTATCCCCTTAGCAAGCACCGGCTAACTCTGTGCC  
AGCAGCCGCGGTAAGACAGAGGGTGCAAACGTTGTTTCGGAATTACTGAGCGTAAAGCGTG  
TGTAGGCGGCTACGTAAGTCGGATGTGAAAGCCCTGGGCTCAACCCAGGAAGTGCACCCG  
ATACTGCATAGCTTGAGACTCGGAGAGGTTGGTGGAAATCTCGGTGTAGAGGTGAAATTC  
GTAGATATCGAGAGGAACATCGGTGGCGAAGGCGGCCAACTGGACGAAGTCTGACGCTGA  
GACACGAAAGCGTGGGGAGCAAACAGGATTAGATACCCCCGTAGTCC

>Otu1278

CCAGCCTATGGGTGCGCAGCAGTAAGGAATATTGGGCAATGGACGCAAGTCTGACCCAGCC  
ATGCCGCGTGCAAGGATGAATGCCCTATGGGTGTAAACTGCTTTTATACGGGAAAAACCC  
CTTCGACGTGTGCAAGGCTGATGGTACCGTAAGAATAAGGATCGGCTAACTCCGTGCCAG  
CAGCCGCGGTAATACGGAGGATCCAAGCGTTATCCGGATTTATTGGGTTTAAAGGGTGCG  
TAGGCGGAATTGTAAGTCAGTGGTGAAATCCTACAGCTTAACTGTAGAATGGCCATTGAT  
ACTGCAGATCTTGAGTATATTTGAAGTGGGCGGAATGTGTCATGTAGCGGTGAAATGCTT  
AGATATGACACAGAACACCGATTGCGAAGGCAGCTCACTAACTACAACCTGACGCTGAGG  
CACGAAAGCGTGGGGAGCAAACAGGATTAGAGACCCCGGTAGTCC

>Otu1282

CCAGCCTATGGGTGGCAGCAGTGGGGAATATTAGACAATGGGCGACAGCCTGATCTAGCG  
ATACTTCGTGGAGGACTAAAGCCTCAGTTGTAAACTCCTATTTTCGATAATAACAATAATG  
ATTATAATTATAAAAGAAGCCCCGGTAAATGTCTGTGCCAGCAGCCGCGGTAATACAGGG  
GGGGCAAGTATTATTCTACATGACTGGGCGTAAAGGATATGTAGGCGGTTTTTTTAATAC  
TAAAAAAAATTCCATATTTAAGTTATGGGTTATTTTTTTTATATTGTAAACTTCGAGTTT  
ATAAAAGATATCAGAACCCACTAGAGTAACAGTGAAATGTGGATAAACTAAGGGGAATTC  
CAAAAGGCGAAAGCAATTATCTTGTTAAAACTGACGCTGAAATATGAAGGTTTGGGGAGC  
AAACAGGATTAGAAACCCTCGTAGTCC

>Otu1283

CCAGCCTACGGGACGCTCCAGTGGGGAATATTGGACAATGGGCGAAAGCCTGATCCAGCA  
ATGCCGCGTGAGTGATGAAGGCCTTAGGGTTGTAAAGCTCTTTTACCCGGGAAGATAATG  
ACTGTACCGGGAGAATAAGCCCCGGCTAACTCCGTGCCAGCAGCCGCGGTAATACGGAGG  
GGGCTAGCGTTGTTTCGGAATTACTGGGCGTAAAGCGCACGTAGGCGGCTTTGTAAGTTAG  
AGGTGAAAGCCTGGGGCTCAACTCCAGAATTGCCTTTAAGACTGCATCGCTTGAACGTCG  
GAGAGGTGAGTGGAATTCCGAGTGTAGAGGTGAAATTCGTAGATATTCGGAAGAACACCA  
GTGGCGAAGGCGGCTCACTGGACGACTGTTGACGCTGAGGTGCGAAAGCGTGGGGAGCAA  
ACGGGATTAGATACCCCTGTAGTCC

>Otu1284

CCAGCCCATGGGGGGCTGCAGTCGAGAATTTTTCTCAATGGGGGAAACCCTGAAGGAGCG  
ACGCCGCGTGAGGATGAAGGTCTTCGGATCGTAAACTCCTGTCATTTGCGAACAAACCT  
ATTCACCTAACACGTGAAGAGCTGATTGTAGCGGAAGAGGAAGGGACGGCTAACTCTGTG  
CCAGCAGCCGCGGTAATACAGAGGTCCCAAGCGTTGTTTCGATTCACTGGGCGTAAAGGG  
TGCGTAGGCGGTCAGGTAAGTCTGATGTGAAATCCCGAAGCCTAACTTCGGAAGTGCATT  
GGATACTATCTGGCTAGAGGAATGGAGGGGAGACTGGAATGCTCGGTGTAGCAGTGAAAT  
GCGTAGATATCGAGCGGAACACCAGTGGCGAAGGCGAGTCTCTGGACATTTCTTGACGCT  
GAGGCACGAAAGCCAGGGGAGCAAACGGGATTAGAGACCCTCGTAGTCC

>Otu1286

CAGCTACGGGAGGCAGCAGTCGAGGATCTTCGTCAATGGGCGCAAGCCTGAACGAGCGAC  
GCCGCGTGTGCGATGAAGGCCCTTCGGGTTGTAAAGCACTGTGAGGGGGATCAAGGCGTA  
AGCTTGATTGATCCCTGGAGGAAGCGCGGGCTAAGTTCTGTGCCAGCAGCCGCGGTAAGAC  
GAACCGTGCGAACGTTGTTTCGGAATCACTGGGCTTAAAGGGCGCGTAGGCGGCAGGCGAG  
GTCGGGGGTGAAATCCCACAGCTTAACTGTGGAAGAGCCTCCGATACCGGCTTGCTGGAG  
GAGGGTAGGGGTGCGCGGAACCTCTGGTGGAGCGGTGAAATGCGTTGATATCAGAAGGAA  
CGCCGGCGGCGAAAGCGGCGCACTGGACCCTTTCTGACGCTGAGGCGCGAAAGCCAGGGG  
AGCAAACGGGATTAGATACCCCACTAGTCC

>Otu1290

CCAGCCTACGGGAGGCTGCAGTGGGGAATATTGCGCAATGGGCGAAAGCCTGACGCAGCG  
ACGCCGCGTGGGGGATGAAGCTTCTCGGAGTGTAACCCCTTTTCGACCCGGAAGAATGTC  
CCGCAAGGGATTGACGGTACGGGTATAAGAAGCCCCGGCTAACTACGTGCCAGCAGCCGC  
GGTAATACGTAGGGGGCCAGCGTTGCTCGGAATTACTGGGCGTAAAGGGTTCTGAGGCGG  
TGCGGCAAGTCGGGAGTGAAATCTCTGGGCTCAACTCAGAGGCTGCTTCCGAAACTGCCG  
TGCTTGAGTGCGGGAGAGGCGAGTGGAATTACAGGTGTAGCGGTGAAATGCGTAGATATC  
TGTAAGAACACCCGTGGCGAAGGCGGCTCGCTGGACCGCAACTGACGCTGAGGAACGAAA  
GCTAGGGGAGCAAACAGGATTAGAAACCCGTGTAGTCC

>Otu1291

CCAGCCTACGGGTGGCAGCAGCAAGGAATTTTTCGCAATGGGCGAAAGCCTGACGCAGCG  
ACGCCGCGTGGGGGATGACGGCCTTCGGGTTGTAAACCCCTTTTCACGAGGAAGAAATAT  
GACGGTACTCGTGGAATAAGTCTTGGCTAACTACGTGCCAGCAGCCGCGGTAATACGTAG  
AAGGCGAACGTTATCCGGATTTACTGGGCGTAAAGCGGGTGTAGACGGTTTTTTAAGTCA  
GTTGTGAAATCTCCGACTCAATCTGGAGTCTGCAATTGATACTGGAGAGCTCGAGGGCA  
TCAGAAGAAAGCGGAATTCACGGTGTAGCGGTGAAATGCGTAGATATCGTGAGGAACACC  
AGTGGCGAAGGCGGCTTTCTAGGATGCTCCTGACGTTGAGGCCCGAAAGTGTGGGGAGCG  
AAACGGATTAGATACCCGCGTAGTCC

>Otu1293

CCAGCCTATGGGTCGCTGCAGCAAGGAATTTTTCTCAATGGGCGAAAGCCTGAAGGAGCG  
ACGCCGCGTGGGGGATGAATGGCTTCGGCCCGTAAACCCCTGTCATTCGGGATCAATGCC  
TGTGGCCTAATACGCTGCAGGTTGATAGTACCGGAAGAGGAAGGGACGGCTAACTCTGTG  
CCAGCAGCCGCGGTAATACAGAGGTCCCAAGCGTTGTTTCGATTCACTGGGCGTAAAGGG

TGCGTAGGCGGTTCGGGTAAGTCTGATGTGAAATCCCGCAGCTTAACTGCGGAACTGCATT  
GGATACTATTTCGGCTAGAGGAGTGGAGGGGAGACTGGAATTCTCGGTGTAGCAGTGAAAT  
GCGTAGATATCGAGAGGAACACCTGTGGCGAAGGCGAGTCTCTGGACACTTCCTGACGCT  
GAGGCACGAAAGCCAGGGGAGCAAACGGGATTAGAAACCCCAGTAGTCC

>Otu1296

CCAGCCTATGGGAGGCAGCAGTGGGGAATATTGCGCAATGGACGAAAGTCTGACGCAGCA  
ACGCCGCGTGAGTGAAGAAGGCCTTTGGGTGTAAAGCTCTTTCGGCCGGGAAGAAGGGC  
GTGGGTGTTAATAGTATCCACATTTGATGGTACCGGAAGAAGAAGCACCGGCTAACTTCG  
TGCCAGCAGCCGCGGTAATACGAAGGGTGCAGCGTGTTCGGAATTACTGGGCGTAAAG  
GGTTTGTAGGCTGAAATGTAAGTCAAGTGTGAAATCCCGAGCTAAACTTGGGACGTGCA  
TTTGAAACTGTGTTTCTTGAGTATCGTAGAGGGTGGTGGAATTGTAGGTGTAGGAGTGAC  
ATCCGTAGAGATCTGCAGGAACATCAGAGGCGAAGGCGACCACCTGGCCGATTACTGACG  
CTGAGGAACGAAAGCGTGGGGAGCAAACAGGATTAGAGACCCGCGTAGTCC

>Otu1297

CCAGCCTACGGGTGGCTCCAGTCGAGGATCTTCGGCAATGGGCGCAAGCCTGACCGAGCG  
ACGCCGCGTGTCGATGAAGGCCTTCGGGTGTAAAGCACTGTGAGGGGGAGGAAGCCG  
CAAGTTGACCTATCCCTGGAGGAAGCACGGGCTAAGTTCGTGCCAGCAGCCGCGGTAAG  
ACGAACCGTGCGAACGTTGTTTCGGAATCACTGGGCTTAAAGGGCGCGTAGGCGGATCATC  
AAGTCCGGGGTGAAATCTTTCGGCTTAACCGGAAAACAGCCTTGATACTGGTGGTCTCG  
AGTGAGGTAGGGGCCGTTGGAACCTCCGGTGGAGCGGTGAAATGCGTTGATATCGGAAGG  
AACGCCGGTGGCGAAAGCGAACGGCTGGACCTCTTCTGACGCTGAGGCGCGAAAGCCAGG  
GGAGCAAACGGGATTAGAGACCTTGTAGTCC

>Otu1298

CAGCCTATGGGTTCGAGCAGTCGAGGATCTTCGGCAATGGGCGCAAGCCTGACCGAGCGA  
CGCCGCGTGCGGGATGAAGGCCTTCGGGTGTAAACCGCTGTGAGTGGGGAGAAAATGCT  
GGTGGGTACTCTCATCAGTTTGATCTATCCGCAGAGGAAGTCAGGGCTAAGTTCGTGCCA  
GCAGCCGCGGTAAGACGAACCTGACGAACGTTATTCGGAATTACTGGGCTTAAAGGGTGC  
GTAGGCTGTGCAGAAAGATGGGTGTGAAATACCTCGGCTTAACCGAGGAACTGCGCCCAA  
AACTACTGTGCTTGAGGGGAGACAGAGGTGAGCGGAACTTAGGGTGGAGCGGTGAAATGCG  
TTGATATCCTAAGGAACACCCGTGACGAAAGCGGCTCACCGGGTCCCTTCTGACGCTGAG  
GCACGAAAGCTAGGGGAGCAAACGGGATTAGATACCCCGTAGCC

>Otu1301

CCAGCCTATGGGTTCGCTGCAGTGAGGAATATTGGACAATGGACGCAAGTTTGATCCAGCA  
TTAAGGCGTGAATCAGTGGAATTTTTCCACCCTTATTACTTGTGAATAAGGGAAGAATT  
TATTTTGAAAGATTCTAAAAAAAAGGACTAGTAAAAATGAATGTACTTTTTGAATAAGTT  
CCGGCTAACTTCGTGCCAGCAGCCGCGGTAACACGGGGGGAACGAGTGTTATTCGTCTTG  
ACTGGGCTTAAAGGTACGTAGGTGGTTCGTATTGTGTGTGTAATTATTAACGAAAATATG  
ACTGAGGGTATATAGGAGATTAATGGTACTCTTGATGTAGGGGTAAAATCTTATGATATC  
AAAGGGGACCATCGATGGGCGAAAACGATTAATCATTATATTACTAACATTGAGGTACTA  
AAGCATAGGGAGCAAACAGGATTAGATACCCCGTAGTCC

>Otu1302

CCAGCCTATGGGGGGCACCAGTGGGGAATCTTGACAATGGGCGAAAGCCTGACGCAGCG  
ACGCCGCGTGAGTGATGAAGGCCCTCGGGTGTAAAGCTCTGTGGAGAGGGACGAATAAG  
TGTTGGCCAATATCCAACATGATGACGGTACCTTTTTAGCAAGCACCGGCTAACTCTGTG  
CCAGCAGCCGCGGTAAGACAGAGGGTGCAAACGTTGTTTCGGAATTACTGGGCGTAAAGCG  
CGTGTAGGCTGCTTGGAAGTCGGATGTGAAAGCCCTGGGCTTAACCCAGGAAGTGCAC  
CGAACTTCCAAGCTCGAGTCCTGGAGAGGGTGGCGGAATTCTCGGTGTAGAGGTGAAAT  
TCGTAGATATCGAGAGGAACACCGGTGGCGAAGGCGGCTACCTGGACAGTGAAGTACGCT  
GAGACGCGAAAGCGTGGGGAGCAAACAGGATTAGAAACCCGAGTAGTCC

>Otu1303

CCAGCCTATGGGGGGCTGCAGTGGGGAATATTGGACAATGGGGGCAACCCTGATCCAGCC  
ATGCCGCGTGAATGAAGAAGGCCTTCGGGTGTAAAGTCTTTTGGCGGGGACGATGATG  
ACGGTACCCGCGAATAAGCTCCGGCTAACTTCGTGCCAGCAGCCGCGGTAATACGAAGG  
GAGCAAGCGTTATCCGGATTCAGTGGGTTTAAAGGGTGCCTAGGTGGGCAGGTAAGTCAG  
TGGTGAAATCTCTGGGCTTAACCCAGAACTGCCGTTGATACTATCTGTCTTGAATGTAG  
TGGAGGTGAGCGGAATATGTCATGTAGCGGTGAAATGCTTAGATATGACATAGAACATCT  
ATTGCGAAGGCAGCTCGCTACACTATTATTGACACTGAGGCACGAAAGCGTGGGGATCAA  
ACAGGATTAGATACCCAGTAGTCC

>Otu1305

CCAGCCTACGGGAGGCAGCAGTGGGGAATATTGGACAATGGGGGCAACCCTGATCCAGCC  
ATGCCGCGTGAAATGATGAAGGCCTTCGGGTGTAAAGTTCTTTTGACGGGGACGATGATG  
ACGGTACCCGTAGAATAAGCTCCGGCTAACTTCGTGCCAGCAGCCGCGGTAATACGAAGG  
GAGCTAGCGTTGTTTCGGAATTACTGGGCGTAAAGGGCGCGTAGGCGGTTTGACAAGTTGG  
ATGTGAAAGCCCAGGGCTCAACCCTGGAATTGCATTCAAGACTGTTTTACTTGATTTCGG  
TAGAGGTGAGTGGAATTCAGTGTAGAGGTGAAATTCGTAGATATTGGGAAGAACACCA  
GTGGCGAAGGCGGCTCACTGGACCGACATTGACGCCGAGGCGCGAAAGCGTGGGGATCAA  
ACAGGATTAGATACCCCCGTAGTCC

>Otu1307

CCAGCCTATGGGGGGCAGCAGTGGGGAATCTTGCGCAATGGGCGAAAGCCTGACGCAGCA  
ACGCCGCGTGAGTGATGAAGGCCTTCGGGTGCTAAAGCTCTTTCGGAAGGGACGAAACCG  
GTCCGGGATAATAAACCGGGCTCTTGACGGTACCTTAAGAAGAAGCACCGGCTAACTCTG  
TGCCAGCAGCCGCGGTAATACAGAGGGTGCAAGCGTTGTTTCGGAATTATTGGGCGTAAAG  
CGCGTGTAGGCGGCAAGGCATGTCGGGTGTGAAAGCCCTCGGCTTAACCGAGGAAGTGCG  
CCCGAAACTACTTTGCTTGAGTACTGGAGAGGGTGCGGGAACCTCCCGGTGTAGAGGTGAA  
ATTCTGTAGGTATCGGGAAGAACACCAGTGGCGAAGGCGGCCACCTGGACAGATACTGACG  
CTGAGACGCGAAAGCGTGGGGAGCAAACAGGATTAGAAACCCTGGTAGTCC

>Otu1309

CCAGCCTATGGGGGGCAGCAGTGGGGAATCTTGCGCAATGGGCGAAAGCCTGACGCAGCG  
ACGCCGCGTGGGTGATGAAGGCCTTCGGGTGTAAAGCCCTGTGGGGAGAGAAGAATAAG  
GCATGCCGAATACGCATGTTGATGACGGTATCTCCTTAGCAAGCACCGGCTAACTCTGTG  
CCAGCAGCCGCGGTAAGACAGAGGGTGCAAACGTTGTTTCGGAATTACTGGGCGTAAAGCG  
CGTGTAGGCGGCAACGCAAGTCGGATGTGAAAGCCCTGGGCTCAACCCAGGAAGCGCAT  
CGATACTGCGGAGCTCGAGTCTCGGAGAGGAGGGTGGAACCTCTCGGTGTAGGGGTGAAAT  
TCGTAGATATCGAGAAGAACACCGGTGGCGAAGGCGGCCCTCTGGACGATGACTGACGCT  
GAGACGCGAAAGCGTGGGGAGCAAACAGGATTAGAGACCCCCGTAGTCC

>Otu1311

CCAGCCTACGGGGTGCTGCAGTCGAGAATTCTTCTCAATGGGGGAAACCCTGAAGGAGCG  
ACGCCGCGTGAGGATGAAGGTCTTCGGATTGTAAACTTCTGTTCATTGGAGAACAAACCG  
CCGGGTAGTAACTGCCCCGGCGTTGATAGTACCTGAAGAGGAAGAGACGGCTAACTCTGT  
GCCAGCAGCCGCGGTAATACAGAGGTCTCAAGCGTTGTTTCGGAATTCATTGGGCGTAAAGG  
GTGCGTAGGTGTTGCCGTAAGTCGGATGTGAAATCCCGGAGCTTAACCTCCGGAAGTGCAT  
TCGATACTGCGGTGCTTGAGGACTGGAGAGGAGATCGGAATTCACGGTGTAGCAGTGAAA  
TGCGTAGATATCGTGAGGAAGACCAGTGGCGAAGGCGGATCTCTGGACAGTTCCTGACAC  
TGAGGCACGAAGGCCAGGGTAGCAAACAGGATTAGAAACCCTAGTAGTCC

>Otu1313

CCAGCCTACGGGTTGCAGCAGTCGAGAATCTTCGGCAATGGGCGCAAGCCTGACCGAGCG  
ACGCCGCGTGCGGGATGAAGGCCTTCGGGTGTAAACCGCTGTTCGAGGGGAGGAAATGC  
CAAGGGGTTCTCTCCTTGGTTTGACCTATCCTCAGAGGAAGTACGGGCTAAGTTTCGTGCC  
AGCAGCCGCGGTAAGACGAACCGTACAAACGTTATTTCGGAATTACTGGGCTTAAAGGGTG  
CGTAGGCGGCCCCGACAAGTTGGGTGTGAAAGCCCTCGGCTTAACCGAGGAATGGCACTCA  
AAACTGCCGGGCTTGAGGGAGATAGAGGTGAGCGGAACTTAGGGTGGAGCGGTGAAATGC  
GTTGATATCCTAAGGAACACCGGTAGCGAAAGCGGCTCACTGGGTCTTCTCTGACGCTGA  
GGTGCGAAAGCGTGGGGAGCAAACAGGATTAGAGACCCTAGTAGTCC

>Otu1314

CCAGCCTACGGGGTGCTGCAGTGGGGAATTTCCACAATGGGCGAAAGCCTGATGGAGCG  
ACGCCGCGTGAGGGATGAAGGTCTTCGGATTGTAAACCTCTTTTGACAGGGAATAAGTGT  
AACAAAGCTAATATCTTTGTTGCTTGACGGTACCTGTAGAATAAGCTACGGCTAACTCTG  
TGCCAGCAGCCGCGGTAATACAGAGGTAGCGAACGTTGTCCGGATTCACTGGGCGTAAAG  
GGCTTGTAGGTGCGGAATAAGTCAGGCGTGAAATCGTATAGCTTAACATACAACCGCG  
TTTGATACTGTTGGCTTGAGTGCAGGAGGGGTAAATTGGAATTTCCGGTGTAGCGGTGAA  
ATGCGTAGATATCGGAAAGAACACCTGTGGCGAAGGCGGATTACTGGCCTGCAACTGACA  
CTGAGGAGCGAAAGCTAGGGGAGCAAACAGGATTAGATACCCCCGTAGTCC

>Otu1315

CCAGCCTATGGGGGGCTGCAGGCGAGAACTTCCGCAATGCGCGAAAGCGTGACGGGGGT  
AGTCCGAGTGCTAGCCTAACGGCTAGCTTTTCGCGAGCTTGATTTCGCTCGTGGAATAAGG  
GTCTGGGCAAATCCTGTGCCAGCCGCCGCGGTAATACAGGTGGCACGAGTGGTGCCCCG

AATATTGAGCTTAAAGCGCCCGTAGCCGGCTTCGCAAGTTTCCCGTCAAATCCCTCAGCT  
TAACTGAGGGGCGCGCGGGAAATACTACGAGGCTCGAGAGTGGGGGAAGCCAAGAGTACG  
TTAGGGGGAGCGGTAAAATGCTTTAATCCTTAACGGACTACCAGTGGCGAAAGCGCCTGG  
CTAAAACACGTCTGACGGTGAGGGACGAAGGCTAGGGGAGCAAACGGGATTAGAAACCC  
CGTAGTCC

>Otu1316

CCAGCCTATGGGGGGCAGCAGTAGGGAATTTTGCGCAATGGACGGAAGTCTGACGCAGCA  
ACGCCGCGTGAGTGATGAAGGTCTTCGGATTGTAAAGCTCTGTTGAGTGGGAAGAATAAC  
CCTGTAATTAATACGTACAGGGGATGACGGTACCATTTCGAGGAAGCCCCGGCTAACTACG  
TGCCAGCAGCCGCGGTAAATACGTAGGGGGCAAGCGTTGTTTCGGAATCACTGGGCGTAAAG  
GGAGCGTAGGCGGTTTCGGTAAGTTAGGAGTGAAATCTACAGGCTTAACCTGTAGATTGCT  
TTTAATACTGCCGATCTTGAGTATTGGAGAGGATGATGGAATTCCAGGTGTAGCGGTGGA  
ATGCGTAGATATCTGGAAGAACACCAGTTGCGTAGGCGGTCATCTGGCCAAATACTGACG  
CTGAGGCTCGAAAGCTAGGGGAGCAAACAGGATTAGAAACCCGTGTAGTCA

>Otu1317

CCAGCCTATGGGGGGCTGCAGTCGAGAATTTTTCACAATGGGGGAACCCCTGATGGAGCG  
ACGCCGCGTGAGGACGAAGGTCTTCGGATTGTAAACTCCTGTCATGCGGGAACAAGAAA  
GTGATAGTACCGCAAGAGGAAGAGACGGCTAACTCTGTGCCAGCAGCCGCGGTAATACAG  
AGGTCTCAAGCGTTGTTTCGGATTTCATTGGGCGTAAAGGGTGCAGGCGGCGTGGAAGT  
TGAGTGTGAAATCCTGAGGCTTAACCTCAGAACTGCACTCAATACTCCCATGCTAGAGGA  
ATGTAGAGGAGAGTGGAATTCACGGTGTAGCAGTGAAATGCGTAGATATCGTGAGGAAGA  
CCAGTTGCGAAGGCGACTCTCTGGGCATTTCTTGACGCTCATGCACGAAGGCCAGGGGAG  
CAAACGGGATTAGAAACCCCTGTAGTCC

>Otu1318

CCAGCCTACGGGAGGCACCAGTCGAGGATCTTCGGCAATGCGCGCAAGCGCGACCGAGCG  
ACGCCGCGTGGGGCGACGAAGGCCTTCGGGTGTAAAGCCCTGTGAGGGGGAGAAAGCCG  
CAAGGCGGATCCATCCCTGGAGGAAGCTCGGGCTAAGTTCGTGCCAGCAGCCGCGGTAAG  
ACGAACCGAGCGAACGTTGTTTCGGAATCACTGGGCTTAAAGGGCGCGTAGGCGGGCTGCC  
GCGTCCGGGGTGAAATCCTCCGGCTCAACCGGAGAACGGCCCCGGGTACGGGCGGCCTCG  
AGGGGGGTAGGGGCGTGCGGAACGTGTGGGTGGAGCGGTGAAATGCGTTGATATCCACAGG  
AACTCCGGTGCGAAGGCGGCACGCTGGACCCCATCTGACGCTGAGGCGCGAAAGCCAGG  
GGAGCGAACGGGATTAGATACCCCGGTAGTCC

>Otu1321

CCAGCCTATGGGTGGCAGCAGTGGGGAATTTTCCGCAATGGGCGAAAGCCTGACGGAGCA  
ATACCGCGTGAGGGAGGAAGGCTTTTGGGTGCTAAACCTCTTTTGTGAGGGAAGAAGATC  
TGACGGTACCTGACGAATCAGCATCGGCTAACTCCGTGCCAGCAGCCGCGGTAATACGGA  
GGATGCAAGCGTTATCCGGAATTATTGGGCGTAAAGCGTCCGCAGGTGGTTTTTCAAGTC  
TGCTGTTAAAGCGTGCGGCTTAACCGCATATCGGCAGTGAAACTGGGAGACTAGAGTTT  
GGTAGGGGTACGGGAATTCCCAGTGTAGCGGTGAAATGCGTAGATATTGGGAAGAACAC  
CAGCGGCGAAAGCGCGTGACTGGGCCTGAACTGACACTCATGGACGAAAGCTAGGGGAGC  
GAAAGGGATTAGAAACCCCTCGTAGTCC

>Otu1322

CCAGCCTACGGGTGTCAGCAGTGGGGAATTTTGGACAATGGGCGAAAGCCTGATCCAGCA  
ACTCTGCGTGAGGGACGAAGTCCTTCGGGATGTAAACCTCTTTTGTGCGGGACGAACGCC  
AGCAATGGCTTGACGGTACCCGGCGAATAAGCCACGGCTAACTACGTGCCAGCAGCCGCG  
GTAAGACGTAGGTGGCGAGCGTTATTTCGGAATTACTAGGCGTAAAGCGAGTGTAGGCGGG  
TGCTTAAGTCCGTGCTGAAATCTCCCGGCTCAACTGGGATAGGTGATGGATACTGGGCG  
CCTAGAGTGGGGTAGGGGCGAGTGGAATTCCTGGTGTAGCGGTGAAATGCGTAGATATCG  
GGAGGAACACCTATGGCGAAAGCAGCTGCCTGGGCCCTTACTGACGCTGAGGTGCGAAAG  
CGTGGGGAGCAAACAGGATTAGAAACCCCTCGTAGTCC

>Otu1323

CCAGCCTACGGGTGCTGCAGTCGAGGATCTTCGGCAATGGGCGCAAGCCTGACCGAGCG  
ACGCCGCGTGTCGAAGAAGGCCTTCGGGTGTAAAGCACTTTGGCAGGGGAGGAAAGCC  
GTAAGGTTTGACCTATCCTGAGAACAAGCACGGGCTAAGTTCGTGCCAGCAGCCGCGGTA  
AGACGAACCGTGCAACGTTGTTTCGGATTCACTGGGCTTAAAGGGCGCGTAGGCGGACTG  
TCAAGTCAGGGGTGAAATCTTTTCGGCTTAACCGGAAAACAGCTTTTGATACTGACAGTCT  
AGAGGGAGGTAGGGGCATGCGGAACCTCCGGTGGAGCGGTGAAATGCGTTGATATCGGAA  
GGAACCTCCGGTGCGAAGCGGCGTGCTGGATCTCTTCTGACGCTGAGGCGCGAAAGCTA

GGGGAGCAAACGGGATTAGAAACCCTAGTAGTCC

>Otu1324

CCAGCCTATGGGAGGCTGCAGTGGGGAATCTTGCGCAATGGGCGAAAGCCTGACGCAGCG  
ACGCCGCGTGGGTGATGAAGGCCTTCGGGTGTAAAGCCCTGTGGGGAAGAACGAATAAG  
GGCGGGTTAATAGCCGTTTGATGACGGTACTTCCTTAGCAAGCACCGGCTAACTCTGTG  
CCAGCAGCCGCGGTAAGACAGAGGGTGCGAACGTTGTTTCGGAATTACTGGGCGTAAAGCG  
CGTGTAGGCGGTCCAGCAAGTCGGGTGTGAAACCCCTAGGCTCAACCTGGGAAGTGCATT  
CGATACTGTTGGACTGGAGTCCCGGAGAGGATGGTGGAACCTCTCGGTGTAGAGGTGAAAT  
TCGTAGATATCGGGAAGAACATCGGTGGCGAAGGCGGCCATCTGGACGGTGAAGTGCAT  
GAGACGCGAAAGCGTGGGGAGCAAACAGGATTAGATACCCGCGTAGTCC

>Otu1325

CCAGCCTATGGGGTGCAGCAGTGGGGAATATTGGACAATGGGCGCAAGCCTGATCCAGCC  
ATGCCGCGTGAGTGACGAAGGTCTTCGGATTGTAAAGCTCTTTTGGCGGGGACGATAATG  
ACGGTACCCGCGAGAATAAGCCCCGGCTAACTTCGTGCCAGCAGCCGCGGTAATACGAAGG  
GGGCTAGCGTTGTTTCGGAATCACTGGGCGTAAAGCGCACGTAGGCGGACTTATAAGTCAG  
GGGTGAAATCCCGGGGCTCAACCTCGGAACGCTTTTGATACTGTGAGTCTCGAGACCGG  
AAGAGGTGAGTGGAATTCCTAGCGTAGAGGTGAAATTCGTAGATATTAGGAAGAACACCA  
GTGGCGAAGGCGGCTCACTGGTCCGGTTCTGACGCTGAGGTGCGAAAGCGTGGGGATCAA  
ACAGGATTAGAAACCCTGGTAGTCC

>Otu1327

CCAGCCTACGGGGTGCAGCAGTAACGAATATTGGGCAATGGGCGAAAGCCTGACCCAGCG  
ACGCCGCGTGTGGGATGAAGTCCCTCGGGATGTAAACCACTGTCAGGGGTTACCAAGTGA  
CCGCCGCTAATATCGGCGGAAGTTGAGGAGCCCCAGAGGAAGCCACGGCTAACTTCGTGC  
CAGCAGCCGCGGTAAGACGAAGGTGGCGAGCGTTGTTTCGGAATCACTGGGCTTAAAGAGC  
GCGTAGGCGGGCTGTTTTGCGCCTTGTTGAAATCCCTCGGCTTAACCGAGGAATGGCTTGG  
CGAACGGACAGCCTTGAGGTAGGTAGAGGTGTGGAGAACTCTTGGTGGAGCGGTGGAATG  
CGTAGATATCAAGAGGAATGCCGGAGGCGAAGGCGCTGCACTGGGCCTATCCTGACGCTG  
AGGCGCGAAAGCCAGGGGAGCAAACGGGATTAGATACCCCTTGTAGTCC

>Otu1328

CCAGCCTACGGGTTGCAGCAGTGAGGAATATTGGTCAATGGGGGCAACCCTGAACCAGCC  
ATGCCGCGTGAAGGATGAAGGCCTTATGGGTGTAAATTTCTTTTGTATGGGGCGAACC  
TTTCTACGCGTTAGAGACCTGACAGTACCATACGAATAAGCATCGGCTAACTCCGTGCCA  
GCAGCCGCGGTAATACGGAGGATGCGAGCGTTATCCGGATTCACTGGGTTTAAAGGGTGA  
GTAGGCGGGTTAGTAAGTCAGTGGTGAAAGTCTGTGCTTAACGATAGGATTGCCATTGA  
TACTGCTAGTCTTGAATTCAGTTGAGGCAGGCGGAATGTGCAGTGTAGCGGTGAAATGCT  
TAGATATTGCACAGAACACCGATTGCGAAGGCAGCTTGCTAAACTGATATTGACGCTGAG  
TCACGAAAGCGTGGGGATCAAACAGGATTAGAAACCCTTGTAGTCC

>Otu1329

CCAGCCTATGGGTGGCAGCAGTGGGGAATATTGCGCAATGGGGGAAACCCCGACGCAGCA  
ACACCGCGTGGAGGAAGAAGGCCTTCGGGTGTAAACTCCTGTCAGTGGGGGAAAAGGTT  
CCGGGGGTGAATAATCTCCGGAGTTTGATTGTACCCGCGAGAGGAAGCCCCGGCTAACTAC  
GTGCCAGCAGCCGCGGTAAACGTAAGGGGGCCAGCGTTACTCGGAATTATTGGGCGTAAA  
GGGCGCGTAGGCGGCATGACAAGTCTTTGGTGAAATCCCTTGGCTTAACCAAGGAATTGC  
CGGAGATACTGTTTTGCTTGAGTCCGGTAGAGGGAAGTGGAATTCCTGGTGTAGCGGTGA  
AATGCGTAGATATCGGGAGGAACACCCATGGCGAAGGCAGCTTCCTGGACCGGCACTGAC  
GCTGAGGCGCGAAAGCGTGGGTAGCAAACAGGATTAGAAACCCTCGTAGTCC

>Otu1330

CCAGCCTATGGGAGGCTGCAGTAACGAATATTCCACAATGGGCGCAAGCCTGATGGAGCG  
ATGCCGCGTGCAGGATGAAGCCCTTCGGGTGTAAACTGCTGTCAGGGGTAAGCAACTCA  
ATGAGCTATCCCAGAGGAAGAGGCGACTAACTCTGTGCCAGCAGTCGCGGTAATACAGAG  
GCCTCGAGCGTTAATCGGAATCACTGGGCTTAAAGGGTGCGTAGGCTGATTTCGTAAGTGC  
CTTGTGAAATCCCATGGCTCAACCATGGAACGCTCGGCAGACTGCGAGTCTTGAGGTGCG  
GTAGAGGTTGCTGGAACGTTAGGTGGAGCGGTGAAATGCGTAGATATCTACAGGAACGCC  
AAAGGTGAAGACAGGCAACTGGGCCGATTCTGACGCTGATGCACGAAAGCGTGGGGAGCA  
AACAGGATTAGAAACCCGCGTAGTCA

>Otu1331

CCAGCCTATGGGGGGCTGCAGTAGGGAATATTGGTTAATGGGCGAAAGCCTGACCCAGCA  
ACGCCGCGTGTGCGATGAAGGCCTTCGGGTGTAAAGCACTTTTTAGTGGGATGAGGAAG

GACAGTACCACTAGATAAAGTCACGGCTAACTACGTGCCAGCAGCCGCGGTAACACGTAG  
GAGACAAGCGTTATCCGGATTTACTGGGTGTAAAGCGCGTGTAGGCGGCTCTGTAAAGTTG  
GATGTGAAAGCTCCTGGCTTAACTGGGAGAGGTTGTTCAAGACTGCAGGGCTTGAGGGTA  
ACAGAGGGGAGTGGAATTCCGAGTGTAGCGGTAAAATGCATAGATATTCGGAAGAACACC  
AGTGGCGAAAGCGGCTCTCTGGGTACATCTGACGCTCAGACGCGAAAGCTAGGGGAGCA  
AACGGGATTAGATAACCCCTGTAGTCC

>Otu1332

CCAGCCTATGGGAGGCTGCAGCAAAGAATCTTCCGCAATGGACGAAAGTCTGACGGAGCG  
ACGCCGCGTGTATGACGAAGGCCGAAAGGTTGTAAAGTACTTTTCTTGAGGAAGAATAAG  
GCAGGGAGGGAATGCCCTGCTGATGACATGAATTGAGGAATAAGCCCCGGCTAACTACGT  
GCCAGCAGCCGCGGTAACACGTAGGGGGCAAGCGTTGTTGAAATTATTTGGGCGTAAAGG  
GCATGTAGGCGGTCATGCAAGCCTGGTGTGAAAAATCTCAGCTTAACTGAGAAGACGCGC  
TGGGAACTGCATAACTTGAGTTCGTAAGGGGAAGCCGGAATTCCAGGTGTAGGGGTGAAA  
TCTGTAGAGATCTGGAAGAACACCAATGGCGTAGGCAGGCTTCTAGTACTGAACTGACGC  
TGAGATGCGAAAGTGCGGGGAGCAAACAGGATTAGATAACCCGTGTAGTCC

>Otu1335

CCAGCCTATGGGGGGCTGCAGGAGGGAATATTGGTAATGGGCGAAAGCCCGAACCAGCAA  
CGCCGCGTGTGCGATGAAGGCCTTCGGGTCGTAAAGCACTTTTCGAGGGGACGAGGAAGG  
ACGGTACCCTCAGAATAAGTCTCGGCTAACTACGTGCCAGCAGCCGCGGTAACACGTAGG  
AGACGAGCGTTATCCGGATTTACTGGGCGTAAAGCGCGTGCAGGCGGTTTGGTAAGTTGG  
ATGTGAAATCTCCCGGCTCAACTGGGAGGGGTCGTTCAAACTACCGAACTTGAGGGCAT  
CAGAGGAAGGTGGAATTCGGGTGTAGTGGTGAAATGCGTAGATATCCGGAGGAACACCA  
GTGGCGAAGGCGGCCTTCTGGGATGCTCCTGACGCTCATAACGAAAGCTAGGGGAGCGA  
ACGGGATTAGAAACCCCTCGTAGTCC

>Otu1338

CCTACGGGGGGCAGCAGTGGGGAATATTGGACAATGGGCGAAAGCCTGATCCAGCAATGC  
CGTGTGTGTGAAGAAGGCCTTCGGGTTGTAAAGCACTTTTCAGTAGGGAAGAAAAGTTCAA  
GGGTAATATCCTTGAATCTTGACGTTACCTACAGAAGAAGCACTGGCTAACTCTGTGCCA  
GCAGCCGCGGTAATACAGAGAGTGCAAGCGTTAATCGGAATTACTGGGCGTAAAGCGCAC  
GTAGGTGGATGCTTAAGTCCGATGTGAAAGCCCTGGGCTTAACCTAGGAATTGCATTCTGA  
TACTGGGCGTCTAGAGTATAGTAGAGGGAAGTGGAATTTCCGGTGTAGCGGTGAAATGCG  
TAGATATCGGAAGGAACATCAGTGGCGAAAGCGGCTTCCTGGACTAATACTGACACTTAG  
GTGCGAAAGCGTGGGGAGCAAACAGGATTAGATAACCCCTCGTAGTCC

>Otu1349

CCAGCCTACGGGGGGCTGCAGTGGGGAATCTTGGACAATGGGCGCAAGCCTGATCCAGCA  
ATGCCGCGTGAGTGAAGAAGGCCTTCGGGTTGTAAAGCTCTTTTGTGAGGGAAGAAACGG  
TAGAGGCTAATATCCTTTGCTAATGACGGTACCTGAAGAATAAGCACCGGCTAACTACGT  
GCCAGCAGCCGCGGTAATACGTAGGGTGCAAGCGTTAATCGGAATTACTGGGCGTAAAGC  
GTGCGCAGGCGGTTGTGCAAGACAGATGTGAAATCCCCGGGCTCAACCTGGGAATTGCAT  
TTGTGACTGCGCAGCTAGAGTGTGTGAGAGGGGGGTAGAATTCACGTGTAGCAGTGAAA  
TGCGTAGATATGTGGAGGAATACCGATGGCGAAGGCAGCCCCCTGGGATAACACTGACGC  
TCATGCACGAAAGCGTGGGGAGCAAACAGGATTAGAGACCCCCGTAGTCC

>Otu1350

CCAGCCTACGGGGGGCAGCAGTGAAGAAGGCTTTCGGGTCGTAAAGCTCTGTGAGGTGGGAAGAAATGT  
ATGGGGTGAATAGCCACCATACTTGACGGTACCACCAGAGGAAGCACCGGCTAACTCCGT  
GCCAGCAGCCGCGGTAATACGGGGGGTGCAAGCGTTGTTGGAATCATTGGGCGTAAAGA  
GCGTGTAGGCGGCTTGATCAGTCAGATGTGAAAGCCCTGGGCTTAACCCAGGAAGTGCAT  
TTGAAACTGTGAGGCTAGAGTAGGGGAGAGGGAAGTGGAATTCCTGGTGTAGAGGTGAAA  
TTCGTAGATATCAGGAGGAACACCGGTGGCGAAGGCGACTTCCTGGCCCTATACTGACGC  
TGAGACGCGAGAGCGTGGGTAGCAAACAGGATTAGATAACCCCTGTAGTCC

>Otu1351

CCAGCCTACGGGGGGCAGCAGTGGGGAATTTTGGACAATGGGCGCAAGCCTGATCCAGCA  
ATGCCGCGTGAGTGAAGAAGGCCTTCGGGTTGTAAAGCTCTTTTGTGAGGGAAGAAACGG  
CCTGTTCTAATACAGTGAGCTAATGACGGTACCTGAAGAATAAGCACCGGCTAACTACGT  
GCCAGCAGCCGCGGTAATACGTAGGGTGCAAGCGTTAATCGGAATTACTGGGCGTAAAGC  
GTGCGCAGGCGGTTTTTGTAAAGTCTGTGCGTGAATCCCCGGGCTCAACCTGGGAATGGCGA  
TGAGAGACTGCAAGGCTAGAGTTTGGCAGAGGGGGGTAGAATTCACGTGTAGCAGTGAAA

TGCGTAGATATGTGGAGGAACACCGATGGCGAAGGCAGCCCCCTGGGTCAAACTGACGC  
TCATGCACGAAAGCGTGGGGAGCAAACAGGATTAGATACCCTAGTAGTCC  
>Otu1355  
CCAGCCTATGGGATGCAGCAGTGGGGAATTTTGGACAATGGGCGCAAGCCTGATCCAGCC  
ATGCCGCGTGCGGGAAGAAGGCCTTCGGGTGTAAACCGCTTTTGTGAGGGAAGAAATCC  
TTTGGGCTAATACCCCGGAGGGATGACGGTACCTGAAGAATAAGCACCGGCTAACTACGT  
GCCAGCAGCCGCGGTAATACGTAGGGTGCAAGCGTTAATCGGAATTACTGGGCGTAAAGC  
GTGCGCAGGCGGTTGTGTAAGACAGATGTGAAATCCCCGGGCTTAACCTGGGAACTGCAT  
TTGTGACTGCACGGCTGGAGTGCGGCAGAGGGGGATGGAATTCGCGTGTAGCAGTGAAA  
TGCGTAGATATGCGGAGGAACACCGATGGCGAAGGCAATCCCCTGGGCCTGCACTGACGC  
TCATGCACGAAAGCGTGGGGAGCAAACAGGATTAGAGACCCGCGTAGTCC  
>Otu1358  
CCAGCCTATGGGTTGCAGCAGTCGAGGATCTTTTGCAATGCCCCGCAAGGGTGACAATGCG  
ACGCCGCGTGTGTGATGAAGGTCTTCGGATCGTAAACACTGTCGGCCGGGATGAATCTC  
TGGAGGATGAATAATCCTGCAGGGTGACAGTACCGGCAAAGGAAGCCACGGCTAACTCCG  
TGCCAGCAGCCGCGGTAATACGGAGGTGGCAGGCGTTACTCGGATTGATTGGGTGTAAAG  
GGTGTGTAGGTGGCAGTTTAAAGTCGAATGTGAAATCCCTTGGCTTAACCAAGGAATTGCA  
TTCGATACTGATCTGCTTGAGCGTCAGAGAGGAAAATGGAATTCACGGTGTAACAGTGAA  
ATGTGTAGATATCGTGAGGAACACCAAGTGGCGAAGGCGATTTTCTGGCTGACTGCTGACA  
CTGAAACACGAGAGCTAGGGGAGCAAACAGGATTAGAAACCCTAGTAGTCC  
>Otu1360  
CCAGCCTACGGGGCGCTGCAGTCGAGAGTATTTAGCAATGGGCGAAAGCCTGACTATGCG  
ACGCCGCGTGAAGGATGAAGGTTTTCGGATTGTAAACTTCTTTTGTGAGGGAAGAACTC  
CTGTCGTTAATAGCGCCAGGATTGACGGTACCTGATGAATAAGCCACGGCTAACTCCGTG  
CCAGCAGCCGCGGTAATACGGAGGTGGCAAGCGTTACTCGGAATCATTGGGTGTAAAGGG  
CAAGTAGGCGGTTTAAATAAGTGAGGGGTGAAATCTTTCGACTCAATCGGGAGACTGCCTT  
TCAAACCTGTTAAACTTGGAGCAGGAAGGGGGGAAATGGAATTCACGGTGTAAGGGTGAAAT  
CTGTAGATATCGTGAAGAACACCGGCGGCGAAGGCGATTTCTTGGTCTGTCTTGACGCT  
GAATTGCGAAAGCTAGGGGAGCAAACAGAAATTAGAAACCCTCGTAGTCC  
>Otu1361  
CCAGCCTACGGGGTGCTGCAGTGAGGAATCTTGCGCAATGGGGGAAACCCTGACGCAGCA  
ACGCCGCGTGAGTGAGGAAGGCCTTCGGGTGTAAAGCTCTGTGAGGTGGGAAGAAGTGT  
ATGGGAGTTAATAGTTTTTCATACTTGACGGTACCACCAGAGGAAGCACCGGCAAACCTCCG  
TGCCAGCAGCCGCGGTAATACGGGGGGTGCAAGCGTTGTTCGGAATCATTGGGCGTAAAG  
AGCGTGTAGGCGGCTGGATAAGTCGGATGTGAAAGCCCTGGGCTCAACCCGGGAAGTGCA  
TTTGAAACTGTTGAGCTTGAGTAAGGGAGAGGGAAGTGGAATTCCTGGTGTAGAGGTGAA  
ATTCGTAGATATCAGGAGGAACACCGGCGGCGAAGGCGACTTCCTGGCCCTATACTGACG  
CTGAGACGCGAGAGCGTGGGTAGCAAACAGGATTAGATACCCGAGTAGTCC  
>Otu1362  
CCAGCCTACGGGATGCACCAGTCGAGAATTTTTTCACAATGGGCGCAAGCCTGATGGAGCG  
ACGCCGCGTGGGGGATGAATGGCTTCGGCCCGTAAACCCCTGTCATTTCGGGAGCAATGCA  
ACGGATTGAATATTTTCGTTGTTGATAGTACCGGAAGAGGAAGGGACGGCTAACTCTGTG  
CCAGCAGCCGCGGTAATACAGAGGTCCCAAGCGTTGTTTCGGAATCACTGGGCGTAAAGGG  
TGCGTAGGTGGCCGGGAAAGTCTGATGTGAAAGCTCGGAGCTTAACCTCGAAATGGCATT  
GGAAACTATTTCGGCTAGAGGTGGGAGGGGGAACTGGAATTCCTGGTGTAGCAGTGAAAT  
GCGTAGATATCGAGAGGAACACCAAGTGGCGAAGGCGAGTTCCTGGACCAATCCTGACACT  
GAGGCACGAAAGCCAGGGGAGCAAACGGGATTAGATACCCGAGTAGTCC  
>Otu1364  
CAGCCTACGGGTCGCACCAGTGGGGAATATTGCACAATGGGCGAAAGCCTGATGCAGCAA  
CGCCGCGTGCACGAAGAAGGTCTTCGGATCGTAAAGTGCTTTTCTGAGAGATGAGAAAGG  
ACAGTATCTCAGGAATAAGTCTCGGCTAACTACGTGCCAGCAGCCGCGGTAATACGTAGG  
GGGCAAGCGTTGTCCGATTACTGGGCGTAAAGCGCACGCAGGCGGTCGTGCCAGTTTC  
CTCTGACAGGTTCGGGCTTAACCCCTGGCAGGCGAGGAAAGACGACACGACTTGAGGACTT  
CAGAGGGACGTGGAATTCAGGTGGAGCGGTGAAATGCGTAGAGATCTGGAAGAACACCA  
AAGGCGAAGGCAGCGTCCTGGGAAGTAACCTGACGCTCATGTGCGAAAGCTAGGGTAGCGA  
ACGGGATTAGAGACCCGAGTAGTCC  
>Otu1365  
CCAGCCTATGGGGGGCTCCAGTCGAGAATTTTTTCACAATGGGCGAAAGCCTGATGGAGCG



ACGCCGCGTGGGGGATGAATGGCTTCGGCCCGTAAACCCCTGTCATTTCGCGATCAAACCT  
TGCCATTTTAAAAGATGGCAAGCTGATAGTAGCGGAAGAGGAAGGGACGGCTAACTCTGTG  
CCAGCAGCCGCGGTAATACAGAGGTCCCAAGCGTTGTTTCGGATTCACTGGGCGTAAAGGG  
TGCGTAGGTGGTAGGGTAAGTCGGATGTGAAAGCTCGGAGCTCAACTCCGAAATGGCATT  
GGATACTACCCTGCTAGAGGGTCGGAGGGGGGACTGGAATTCTCGGTGTAGCAGTGAAAT  
GCGTAGATATCGAGCGGAACACCAGTGGCGAAGGCGGCTCACTGGACCACAACCTGACGCT  
GATGCACGAAAGCGTGGGGAGCAAACAGGATTAGAAACCCCTGTAGTCC

>Otu1368

CCAGCCTACGGGACGCAGCAGTCGAGAATTTTTTACAATGGGCGCAAGCCTGATGGAGCG  
ACGCCGCGTGGGGGATGAATGGCTTCGGCCCGTAAACCCCTGTCATTTCGCGATCAAACCT  
TGTTATTTTAAAAGATGGCGAGCTGATAGTAGCGGAAGAGGAAGGGACGGCTAACTCTGTG  
CCAGCAGCCGCGGTAATACAGAGGTCCCGAGCGTTGTTTCGGATTCACTGGGCGTAAAGGG  
TGCGTAGGTGGCGAGGTAAGTCGGATGTGAAAGCTCGGAGCTCAACTCCGAAATGGCATT  
GGAAACTACCTTGCTCGAGGAATGGAGGGGGGACTGGAATTCTCGGTGTAGCAGTGAAAT  
GCGTAGATATCGAGAGGAACACCAGTGGCGAAGGCGAGTCCCTGGACATTTCTTGACACT  
GAGGCACGAAAGCTAGGGGAGCAAACAGGATTAGATACCCCTGTAGTCC

>Otu1369

CCAGCCTACGGGGGGGCTGCAGTCGAGAATCTTCCGCAATGGGCGAAAGCCTGACGGAGCG  
ACGCCGCGTGCGGGATGAAGGCCTTCGGGTGTAAACCGCTGTCAGTGGGGAGGAAATGC  
ACGGGGGTCTCCCTTGTGTTTGACCGATCCGCAGAGGAAGCACAGGCTAAGTTCGTGCC  
AGCAGCCGCGGTAACACGAACTGTGCGAACGTTATTTCGGAATTACTGGGCTTAAAGAGTT  
CGTAGGCGGCCTGTTAAGTCGGGTGTGAAATCCCTCGTCTCAACCGAGGAATTGCGTTCG  
AAACTGGCGGGCTTGAGTGAGATAGAGGTGAGCGGAACTGATGGTGGAGCGGTGAAATGC  
GTTGATATCATCAGGAACACCGGTTGCGAAGGCGGCTCACTGGGTCTTTACTGACGCTGA  
GGAACGAAAGCTAGGGGAGCGAACGGGATTAGATACCCCTCGTAGTCC

>Otu1370

CCAGCCTATGGGTTGCAGCAGTTCGGAATATTCGGCAATGGGCGAAAGCCTGACCGAGCG  
ACGCCGCGTGCGGGATGAAGGCCCTCTGGGTGTAAACCGCTGTCACAGGTGAGCAAATC  
ACGCGTAATTAACAACCTACGTGTGTTGAGTTAAGCTTGAGAGGAAGCCCCCGCTAATCAC  
GTGCCAGCAGCGGCGGTAATACGTGAGGGGGCAACGTTGTTTCGGTGTCACTGGGCTTAAA  
GGGCGCGTAGGTGGCTGCGTAAGTAACGTGTGAAAGCCCTCGGCTTACCCGGGGGAATTGC  
GCGTTATACTGCGTGGCTTGAGGATCTCAGGGGAAGGGGGAACTCCAGGTGTAGCGGTGA  
AATGCGCAGATATCTGGGGGAAGGCCGGCGGCGAAGGCGCCCTTCTGGGAGACACCCGAC  
ACTGAGGCGCGAAAGCGTGGGGAGCAAACAGGATTAGAAACCCGTGTAGTCC

>Otu1371

CCAGCCTATGGGGGGGCTGCAGTGGGGAATATTGGACAATGGGCGAAAGCCTGATCCAGCA  
ATACCGCGTGAGTGATGAAGGCCTTAGGGTTGTAAAGCTCTTTTAGTAGGGAAGATAATA  
ACGGTACCTACAGAAAAAGCCCCGGCTAACTCCGTGCCAGCAGCCGCGGTAAGACGGAGG  
GGGCTAGCGTTGTTTCGGAATTACTGGGCGTAAAGAGCGCGTAGGCGGTATAGTAAGTTGG  
AAGTGAAAGCCCGAGGCTTAACCTCGGAATTGCTTTCAAAACTGCTAAACTAGAGTGTGG  
TAGGGGATGGTAGAATTCCTAGTGTAGAGGTGGAATTCTTAGATATTAGGAGGAATACCG  
GTGGCGAAGGCGACCATCTGGGCCATTACTGACGCTGAGGTGCGAAAGCGTGGGGAGCAA  
ACAGGATTAGAAACCCCTCGTAGTCC

>Otu1372

CCAGCCTATGGGTGGCTGCAGTGGGGAATATTGCGCAATGGGGGAAACCCCTGACGCAGCA  
ACGCCGCGTGAGTGAGGAAGGACTTCGGTCTGTAAAGCTCTGTTAATGTGGAAAAATGGT  
TAGTGGTCTAATAGGCCATTGATTTGATGGTACACATAGAGGAAGCACCGGCTAACTTCG  
TGCCAGCAGCCGCGGTAATACGAAGGGTGCAAGCGTTGTTTCGGATTTATTGGGCGTAAAG  
CGCTCGTAGGCGGACCTATAAGTCAGATGTGAAATCTCGGGGCTCAACCTCGAAACTGCG  
TCTGAAACTGTGGGTCTAGAATCTTGAGGGGGGAAGGGGAATTCGCATGTAGGGGTAAA  
ATCCGTAGATATGCGAAGGAACACCAGAGGCGAAGGCGCCTTCCTGGACAAGTATTGACG  
CTAAGGAGCGAAAGCGTGGGGATCAAACAGGATTAGAAACCCGAGTAGTCC

>Otu1378

CCAGCCTACGGGGGGCACCAGCAAGGAATTTTGTGCAATGGGCGAAAGCCTGACACAGCG  
ACGCCGCGTGAAGGATGAAGATCTTCGGATTGTAAACTTCTTTTTTCAGGGAAGAATAAT  
GACGGTACCTGAAGAATAAGCTTCGGCTAACTACGTGCCAGCAGCCGCGGTAATACGTAG  
GAAGCGAGCGTTATCCGGATTTATTGGGCGTAAAGAGAGCGCAGGCGGTTCTATAAGTCA  
GATGTTAAACTCCCGGCTTAACCTGGGAGAGGTCATCTGATACTGTTGGACTCGAGAGCA

GTAGGGGGAGATGGAATTCCCGGTGTAGCGGTGAAATGCGTAGATATCGGGGGGAACACC  
AGTGCGGAAAGCGGTCTCCTTGGCTGTTTCTGACGCTTATGCTCGAAAGCGTGGGGAGTA  
AACAGGATTAGAAACCCCTGTAGTCC

>Otu1381

CCAGCCTATGGGTGGCAGCAGCCGAGAATATTCGACAATGGGCGAAAGCCTGATCGAGCG  
ACGCCGCGTGATGGATGAAGACCCTCTGGGTCGTAAACATCTTTTGTGAGGGAGAAAGTT  
TATTGATAGTACCTCAAGAATAAGGGGTTGCTAAACTCGTGCCAGCAGCAGCGGTAATAC  
GAGTGCCCCGAGCGTTATCCGGAATTATTGGGCGTAAAGGGTGTGTAGGTGGTTGCGTTA  
GTCGCTTGTTAAAACCCGGGGCTTAACCCCGGAACCGCGAGCGAAACGGCGCGACTAGAG  
GATGGCAGGGATGTGTGGAACCTCATGGAGTAGGGGTGAAATCCGTTGATATCATGGGGAA  
CACCAAAGCGAAGGCAACACATTGGGCCACTCCTGACACTGAAACACGAAAGCGTGGGT  
AGCGAATGGGATTAGATACCCCGTAGTCC

>Otu1382

CCAGCCTATGGGTGGCTCCAGTGAGGAATATTGCACAATGGGCGCAAGCCTGATGCAGCG  
ACGCCGCGTGGGTGAAGAAGGTTTTTCGGATCGTAAACCCCTTTTCTGTGTGACGAGCAAG  
GACGGTAGCACAGGAATAAGTCTCGGCTAACTACGTGCCAGCAGCCGCGGTAAACGTAG  
GAGACAAACGTTATCCGGAGTTACTGGGCGTAAAGGGCGTGTAGGTGGTTTCGTAAGTCT  
GGCGTGAAATTTTTTCGGCTTAACCGGGAAAGGTCGTTCGGATACTGCGGGACTAGAGGACG  
GTAGAGGCATGTGGAATTCCGGGTGTAGTGGTGAAATGCGTAGAGATCCGGAGGAACACC  
AGTGCGCAAGGCGACATGCTGGGCCGTACCTGACACTGATGCGCGACAGCATGGGGAGCA  
AACAGGATTAGATACCCTAGTAGTCC

>Otu1384

CCAGCCTACGGGGTGCACCAGTGGGGAATATTGGGCAATGGGCGCAAGCCTGACCCAGCG  
ACGCCGCGTGGGGGATGAAGGTCCTTCGGATCGTAAACCCCTGTCAGGAGAGACGAACGCC  
TTGCGATTAAATAGTCGCAAGGTCGTACGGTACCTCCAAAGGAAGCCCCGGCTAACTCCGT  
GCCAGCAGCCGCGGTAATGCGGAGGGGGCAAGCGTTATTCGGAATTACTGGGCGTAAAGC  
GCGCGCAGGTGGCGTGGTAAGTGGCAGGTGAAAGCCCTCGGCTCAACCGAGGAATTGCCT  
GCCAACTGTTCATGCTTGAGGCCGGGAGGGGAAAGCGGAATTCCTGGTGTAGCGGTGAAA  
TGCGTAGATACCAGGAGGAACACCGGTGGCGAAGGCGGCTTTCTGGACCGGTTCTGACAC  
TCATGCGCGAAAGCGTGGGGAGCAAACAGGATTAGAAACCCGTGTAGTCC

>Otu1385

CCAGCCTACGGGGGGCTCCAGTCGAGAATTTTTTCACAATGGGGGAAACCCCTGATGGAGCG  
ACGCCGCGTGGGGGATGAATGGCTTCGGCCCGTAAACCCCTGTCATTTCGGGATCAATGCC  
TGCGATTTAAAGATAGCAGGTTGATAGTACCGGAAGAGGAAGGGACGGCTAACTCTGTG  
CCAGCAGCCGCGGTAATACAGAGGTCCCAAGCGTTGTTTCGGATTTACTGGGCGTAAAGGG  
TGCGTAGGTGGTTGGGTAAGTCTGATGTGAAATCTCGGAGCTTAACCTCGAAACGGCATT  
GGATACTATTTCAGCTTGAGAGTTGGAGGGGGGACTGGAATTCCTCGGTGTAGCAGTGAAAT  
GCGTAGATATCGAGAGGAACACCAGTGGCGAAGGCGAGTCCCTGGACAACTTCTGACACT  
GAGGCACGAAAGCCAGGGGAGCAAACGGGATTAGAGACCCCGGTAGTCC

>Otu1386

CTAGCCTATGGGTGGCTGCAGTCGAGAATAATTCGCAATGGACGAAAGTCTGACGATGCG  
ACGCCGCGTGAACGATGAAGGCCCTTCGGGTTGTAACGTTCTGTTGTCTGGAACAAGAGT  
AGTTGACGAATAGTTGACTACAATGAGGGTACAGGAAGAGGAAGCACCCGGCTAATTCCGT  
GCCAGCAGCTGCGGTAATACGGAAGGTGCAAGCGTTAGTCGGAATTACTGGGCGTAAAGG  
GTGCGTAGGCGGTGATGTAAGTCGGACGTGAAATTCGGGGCTCAACCTCGGAACCTGCGT  
ACGAAACTGCATCACTTGAGGAATGGCGGAGAAAATGGAATTCATATGTAGCGGTGAAA  
TGCGTAGATATATGGAAGAACACCTGTGGCGAAAGCGGTTTTCTAGCCTTCTCCTGACGC  
TGAGGCACGAAAGCAAGGGGAGCAAACAGGATTAGAAACCCCTCGTAGTCC

>Otu1387

CCAGCCTACGGGTGGCTGCAGTGGGGAATATTGGACAATGGGGGAAACCCCTGATCCAGCA  
ACGCCGCGTGTGGGATGACGGCCTTCGGGTTGTAAACCACTTTTTAGGGGGACGATGATG  
ACGGTACCCCTGGAATAAGCCCCGGCTAACTCTGTGCCAGCAGCCGCGGTAAGACAGAGG  
GGGCAAGCGTTGTCCGGAATTACTGGGCGTACAGCGCACGCAGGTGGCATGGCAAGTGTG  
GTGTGAAAGCCCCGCGCTTAACGCGGGGAGGCCAGCACAGACTGCCACGCTAGAGGGATG  
CAGGGGGTGGTGGAATTGCCGGTGTAGTGGTGAAATGCGTAGAGATCGGCAGGAACACCA  
AGGACGAAGGTAGCCACCTGGGCATCACCTGACACTCATGTGCGACAGCGTGGGGAGCCA  
ACCGGATTAGATACCCGAGTAGTCC

>Otu1388

CCAGCCTACGGGGGGCAGCAGTAGGGAATTTTGCGCAATGGGCGAAAGCCTGACGCAGCA  
ACGCCGCGTGAGTGATGAAGGTCTTCGGATTGTAAAGCTCTGTCAGGAGGGAAGAACCTG  
CCGATTTTATACCTCGGCACCTGACGGTACCTCCAGAGGAACTCCGGCTAACTCCGTGCC  
AGCAGCCGCGGTAATACGGAGGGAGTGAGTGTTCGGATTTATTGGGTGTAAAGGGAG  
TGTAGGCGGAAATTTAAGTCAGGGGTGAAAAGTTAGGGCTTAACCCTAAACCTGCCTTTG  
AGACTGAATTTCTTGAGTATGGAAGAGGGCGATAGAATTCCTGGTGTAGCGGTGGAATGC  
GTAGATATCAGGAGGAATACCGATAGCGAAGGCAGTCGCCTGGGACAATACTGACGCTGA  
AACTCGAAAGCATGGGGAGCAAACAGGATTAGAAACCCGAGTAGTCC

>Otu1389

CCAGCTACGGGTTGCACCAGTCGAGAATCTTCCACAATGGACGAAAGTCTGATGGAGCGA  
CGCCGCGTGGTTGACGAAGTCCTTCGGGACGTAAAGATCTTTTATGAGGGAAGAAGTATA  
CTGACTGTACCTCATGAATAAGGGGCTCCTAATCTCGTGCCAGCAGGAGCGGTAATACGA  
GAGCCCCGAGCGTTATCCGGAATTATTGGGCGCAAAGGGTGCGTAGGCGGTTATGTTAGT  
CGTAGGTCAAAGGCCCCGAGCTTAACCTCGGGAAAGGCACACGAAACGGCATTGACTTAGAG  
AGGAGAAGAGGTGTGCGAACTCATGGTGTAGGGGTGAAATCCGTTGGTATCATGGGGAA  
CACCGAAAGCGAAAGCAGCACACTGGTCTCTTTCTGACGCTGAGGCACGAAAGCGTGGGT  
AGCGAATGGGATTAGAAACCCCTAGTAGTCC

>Otu1391

CCAGCCTACGGGAGGCAGCAGGCATTGCTTGCTGTCTTTTGGCAACCTTAAAACGGTTGC  
AGAATAAGTTCTGGGTAAGACCAGTGCCAGCCGCCATGGCGCGCAAATTCGCACGCGTG  
CACGGTACGCGGTAATACTGGCAGAACGAGTGGTGCCACGAATATTGGGTTTAAAGAGA  
CCGTAGCTGGTCTGTTAAGTTCGCTGTGAAATCTTGGGGCTTAACCTCAAGGAGTGCAGC  
AAATACTGGCGGACTTGAGGGCGGGGAGGCCGGGAGTACTTACGGGGTAAGGGTAAAT  
CTCGTAATCCTGTAAGGACTACCAAGTGGCGAAGGCGCCCGGCCAAAACGCGTCTGACAGT  
GAGGGTCGAAGGCTAGGAGAACGAATCGGATTAGAGACCCCAGTAGTCC

>Otu1393

CCGCCTACGGGGCGCAGCAGTGGGGAATATTGCACAATGGACGAAAGTCTGATGCAGCAA  
CGCCGCGTGAGTGATGAAGGTCTTCGGATTGTAAAGCTCTGTCTTCTGGGACGATAATGA  
CGGTACCAGAGGAGGAAGCCACGGCTAACTACGTGCCAGCAGCCGCGGTAATACGTAGGT  
GGCGAGCGTTGTCCGGAATTACTGGGCGTAAAGGATGCGTAGGCGGATATTTAAGTCAGA  
TGTGAAACCCCCAGGCTTAACCTTGGGGACTGCATTTGAAACTGGGTATCTAGAGTGCAGG  
AGAGGTAAGTGGAATTCCTAGTGTAGCGGTGAAATGCGTAGAGATTAGGAAGAACATCAG  
TGCGCAAGGCGACTTACTGGACTGTAACCTGACGCTGAGGCATGAAAGCGTGGGTAGCAAA  
CAGGATTAGATACCCCCGTAGTCC

>Otu1394

CCAGCCTATGGGTGCGACCAGTGGGGAATATTGGGCAATGGGCGCAAGCCTGACCCAGCC  
ATGCCGCGTGAGTGATGAAGGCCTTCGGGTCGTAAAGCTCTGTGGGGAGGGACGAACAAG  
CCTTTGGCTAATATCCAAGGGCCCTGACGGTACCTCCTTAGCAAGCACCGGCTAACTCCG  
TGCCAGCAGCCGCGGTAATACGGAGGGTGCAAACGTTGCTCGGAATCATTTGGGCGTAAAG  
CGCGCGTAGGCGGTTCTGTTAAGTCGGATGTGAAATCCCTGGGCTCAACCCAGGAAGTGCA  
TACGAAACTGGCGAGCTTGAATATGGAAGAGGGTTCGCGGAATTCCCGGTGTAGAGGTGAA  
ATTCGTAGATATCGGGAGGAACACCAGTGGCGAAGGCGGCGACCTGGGCCAATATTGACG  
CTGAGGTGCGAAAGCGTGGGGAGCAAACAGGATTAGATACCCGTGTAGTCC

>Otu1395

CCAGCCTTACGGGGGGCTGCAGTAGGGAATATTGGTAATCTGCGAAAGCGGGAACCAGCA  
ACGCCGCGTGATGCGATGAAGGCCTTCGGGTCGTAAAGCACTTTTTGAGGGGACGAGGAAG  
GACGGTACCCTCAGAATAAGTCTCGGCTAACTACGTGCCAGCAGCCGCGGTAACACGTAG  
GGGCAAGCGTTGTTGGAATTAAGTGGGCGTAAAGGGCATGTAGGCGGCTCTGTAAGTCC  
GGCGTGGAAGCCACGGCTCAACCGTGGGATTGCGCTGGAACTGCGAGGCTTGAATCAT  
GGAGAGGGAGCTAGAATTCCTGGTGTAGGGGTGAAATCTGTAGAGATCAGGAAGAATACC  
AATGGCGAAGGCAAGCTCCTGGCCAATGATTGACGCTGAGGTGCGAAAGTGTGGGGATCA  
AACAGGATTAGAAACCCCCGTAGTCC

>Otu1397

CCAGCCTATGGGAGGCAGCAGTGGGGAATCTTCCGCAATGGACGAAAGTCTGACGGAGCG  
ACGCCGCGTGAGGGATGAAGGTCTTCGGATTGTAAACCTCTTTTGAATGGGAATAAGTGC  
AGCGGGCGAATAGTACCGCTGTTTGACTGTACCATATGAAGAAGCTACGGCTAACTCTGT  
GCCAGCAGCCGCGGTAATACAGAGGTAGCAAGCGTTGTCCGGATTCACTGGGCGTAAAGG  
CGGTGTAGGTGGCCTTATAAGTCGGGTGTGAAATCGTTCCGCTTAACGGAACAATTGCAC

CCGATACTGTTTGGCTTGAGTGCAGTAGGGGAAATTGGAATTTCCGGTGTAGCGGTGAAA  
TGCGTAGATATCGGAAAGAACACCCGTGGCGAAGACGGATTTCTGGACTGCAACTGACAC  
TGAGGCGCGAAAGCCAGGGGAGCAAACGGGATTAGAAACCCCCGTAGTCC

>Otu1399

CCAGCCTATGGGGTGCTCCAGTAGGGAATATTGGTAATGTGCGAAAGCGCGAACCAGCAA  
CGCCGCGTGCACGATGAAGGCCTTCGGGTGTAAAGTGCTTTTAGAGAGGATGAGGAAGG  
ACAGTACTCTCTGAATAAGCCTCGGCTAACTACGTGCCAGCAGCCGCGGTAGAACGTAGG  
AGGCGAGCGTTATCCGGATTTACTGGGTGTAAAGCGCATGCAGGCGGATGACTAAGTTGG  
GTGTGAAAGCTCCTGGCCTAACTGGGAGAGGTCGCTCAAGACTGGTCGTCTCGAGAGTGG  
TAAGGGAAGGTGGAATTTCCGGGTGTAGTGGTGAAATGCGTAGATATCCGGAGGAACACCA  
GTGGCGAAGGCGGCCTTCTGGGCCACATCTGACGCTCAGATGCGAAAGCTAGGGTAGCAA  
ACGGGATTAGAGACCCTAGTAGTCC

>Otu1400

CCAGCCTATGGGGTGCTGCAGTCGAGAATTTTTTCACAATGGGCGAAAGCCTGATGGAGCG  
ACGCCGCGTGGGGGATGAATGGCTTCGGCCCGTAAACCCCTGTCATTTCGCGAACAATTGT  
TGCGGTTTTAATACATCGCAGCTTGATAGTAGCGGGAGGGGAAGGGACGGCTAACTCTGTG  
CCAGCAGCCGCGGTAATACAGAGGTCCCGAGCGTTGTTTCGATTCACTGGGCGTAAAGGG  
TGCGTAGGTGGTTGGGTAAGTTTGATGTGAAATCTCCGGGCTTAACCCGGAATGGCATT  
GAATACTATTTCAGCTCGAGGATTGGAGGGGGGACTGGAATTCTCGGTGTAGCAGTGAAAT  
GCGTAGATATCGAGAGGAACACCAGTGGCAAAGGCGAGTCCCTGGACAACCTCTGACACT  
AAGGCACGAAAGCTAGGGGAGCAAACAGGATTAGATACCCCCGTAGTCC

>Otu1405

CCAGCCTACGGGTGGCAGCAGTCGAGAATCTTCCGCAATGGACGAAAGTCTGACGGAGCG  
ACGCCGCGTGATGGATGAAGTCCTTCGGGACGTAAACATCTTTTATGAGGGATGACTATT  
CGACAGTACCTCATGAATAAGGGGCTCCTAACTCTGTGCCAGCAGGAGCGGTAATACAGA  
GGCCCCAAGCATTACCCGGAATCACTGGGCGTAAAGGGTGCGTAGGTGGCGCCATTAGTC  
CTCTTTCAAATCCTCCGAGCTCAACTCGGAGGCTCGAGAGGAAACGGTGGCGCTTGAGGG  
TGTACGAGGTACGTGGAACCTTAGGTGTAGGGGTGAAATCCGTTGATATCTAGGGGAACA  
CCGAATGCGAAGGCAGCGTACTGGGACATTCTGACACTGAGGCACGAAAGCGTGGGTAG  
CGAAAAGGATTAGAAACCCAGTAGTCC

>Otu1409

CCAGCCTACGGGGGGCTGCAGTGGGGAATTTTCCGCAATGGGCGAAAGCCTGACGGAGCA  
AGACCGCGTGGGGGAAGAAGGTTTGTGGATTGTAAACCCCTTTTGATTGGGAAGAACACA  
ATGACGGTACCAATCGAATCAGCATCGGCTAACTCCGTGCCAGCAGCCGCGGTAATACGG  
AGGATGCAAGCGTTATCCGGAATTATTGGGCGTAAAGCGTCCGTAGGTGGCATTGCAAGT  
CAGTTGTTAAAGCGCGGGGCTTAACCCCGTAAAGGCAATTGAACTGCGAAGCTAGAGTG  
CGATAGGGGCAAGGGGAATTCCCAGTGTAGCGGTGAAATGCGTAGATATTGGGAAGAACA  
CCGGTGGCGAAAGCGCCTTGCTGGGTCTGCACTGACACTGAGGGACGAAAGCTAGGGGAG  
CGAAAGGGATTAGAGACCCCGTAGTCC

>Otu1410

CCAGCCTATGGGGGGCAGCAGTCGAGGATCTTTGGCAATGGGCGCAAGCCTGACCAAGCG  
ACGCCGCGTGTGCGATGAAGGCCTTCGGGTGTAAAGCACTGTGAGGGGGGATAAAGCCG  
CAAGGTTGATTGATCCCTGGAGGAAGCACGGGCTAAGTTCGTGCCAGCAGCCGCGGTAAG  
ACGAACCGTGCGAACGTTGTTTCGGAATCACTGGGCTTAAAGGGCGCGTAGGCGGCAGATC  
AAGTCCGGGGTGAAATCCTCCAGCTCAACTGGAGAAGTGCCTTGATACTGATTTGCTCG  
AGGGAGGTAGGGGTCGAGGGAACTTCTGGTGGAGCGGTGAAATGCGTTGATATCAGAAGG  
AACGCCGGTGGCGAAAGCGCTCGACTGGACCTCTTCTGACGCTGAGGCGCGAAAGCTAGG  
GGAGCAAACGGGATTAGAAACCCAGTAGTCC

>Otu1411

CCAGCCTACGGGGGGCAGCAGTAGGGAATATTGGTCAATGGATGCAAGTCTGAACCAGCC  
ATGCCGCGTGCAGGAAGAAGGCCTTCTGGGTGTAAACTGCTTTTGCCAGGGGATAAAAC  
GGATCTGCGGATCTAATTGAAGGTACCTGGTGAATAAGCCACGGCTAACTACGTGCCAGC  
AGCCGCGGTAATACGTAGGTGGCAAGCGTTGTCCGATTTATTGGGTTTAAAGGGTGCGT  
AGGCGGTCTATAAGTCAGTGCTGAAATATCCCGGCTTAACCGGGAGGGTGGCATCGATA  
CTGCAGGACTTGAGTAGAGTCGAAGTGGGCGGAATTGACGGTGTAGCGGTGAAATGCTTA  
GATATCGTCAAGAACCCGATAGTGAAGACAGCTCACTAGGCTCAAACCTGACGCTGAGGC  
ACGAAAGTGTGGGGATCAAACAGGATTAGAAACCCGAGTAGTCC

>Otu1412

CCAGCCTATGGGGGGCACCAGTGGGGAATTTTGCACAATGGGGGAAACCCTGATGCAGCA  
ACGCCGCGTGAGGATGAAGTCCCTTGGGATGTAAACTCCTTTTCGATCGGGACGATTATG  
ACGGTACCGGAAGAAGAAGCACC GGCTAACTCTGTGCCAGCAGCCGCGGTAATACAGAGG  
GTGCAAGCGTTGTTTCGGAATTATTGGGCGTAAAGGGTGCGTAGGCGGTTGGGTAAGTCTG  
ACGTGAAATCTCCGGGCCTAACCCGGAAGTGC GTTGGATACTATCCGGCTAGAGGAATG  
GAGGGGAGACTGGAATACTTGGTGTAGCAGTGAAATGCGTAGATATCAAGTGAACACCA  
GTGGCGAAGGCGAGTCTCTGGACATTTCTGACGCTGAGGCACGAAAGCCAGGGGAGCAA  
ACGGGATTAGATACCCGGGTAGTCC

>Otu1417

CCAGCCTACGGGGTGACCAGTGGGGAATCTTGCACAATGGGGGCAACCCTGATGCAGCG  
ACGCCGCGTGAACGATGAAGCCCTTCGGGGTGTAAGTTCTTTTCGACGGGAACGATAATG  
ACGGTACCCGGAGAAGAAGCTGCGGCTAACTACGTGCCAGCAGCCGCGGTAATACGTAGG  
CAGCAAGCGTTGTTTCGAGTTACTGGGCGTAAAGAGTGCGTAGGCGGTCAGCCAAGTTTG  
GTGTGAAATCTCCCGGCTCAACTGGGAGGGTGCGCCGAAAACCTGGTTGGCTAGAGTATGG  
GAGAGGAAAGCGGAATTCCTGGTGTAGCGGTGAAATGCGTAGATATCAGGAGGAACACCT  
GTGGTGTAGACAGCTTTCTGGACCATAACTGACGCTGAGGCACGAAAGCGTGGGTAGCAA  
ACAGGATTAGATACCCCTGTAGTCC

>Otu1419

CCAGCCTATGGGGGGCAGCAGTGGGGAATCTTGACAATGGGGGCAACCCTGATCCAGCC  
ATGCCGCGTGAGTGAAGAAGGCCCTTAGGGTTGTAAAGCTCTTTCACACGTGACGATGATG  
ACGGTAACGTGAGAAGAAGCCCCGGCTAACTTCGTGCCAGCAGCCGCGGTAATACGAAGG  
GGGCTAGCGTTGTTTCGGAATTACTGGGCGTAAAGCGCGCGTAGGCGGTTATGTAAGTCAG  
GGGTGAAATCCCGGGGCTCAACCCTGGAAC TGCTTTGAGACTGCGTAGCTAGAGAACGG  
GAGAGGTGAGTGGAATTC CAGTGTAGAGGTGAAATTCGTAGATATTGGGAAGAACACCG  
GTGGCGAAGGCGGCTCACTGGCCCGTTTCTGACGCTGAGGC GCGAAAGCGTGGGGAGCAA  
ACAGGATTAGATACCCCGTAGTCC

>Otu1421

CCAGCCTACGGGGGGCTCCAGTGAGGAATCTTGCGCAATGGGGGAAACCCTGACGCAGCA  
ACGCCGTGTGAGTGATGAAGGTTTTTCGGATCGTAAAGCTCTGTTTGAAAGGGACGAAACGT  
ATTTGATTAATACTCAAATAACTTGACGGTACCTTCAGAGGAAGCACCCGGCTAACTCCGT  
GCCAGCAGCCGCGGTAATACGGAGGGTGCAAGCGTTGTTTCGGAATCACTGGGCGTAAAGG  
GCGTGTAGGTGGCTAATTAAGTCAGGTGTGAAATCCTTCGCTTAACGGGAGAAGTGCAC  
TTGAAACTGCTTAGCTAGAGTACGGGAGAGGAAGGTGGAATTCCTGGTGTAGAGGTGAAA  
TTCATAGATATCGGGAAGAACACCGGTGGCGAAGGCGGCCTTCTGGCCCGATACTGACGC  
TGAGACGCGAAAGCGTGGGGAGCAAACAGGATTAGATACCCCTCGTAGTCC

>Otu1422

CCAGCCTATGGGACGCTCCAGTGGGGAATCTTGCGCAATGGACGAAAGTCTGACGCAGCC  
ACGCCGCGTGAGTGAAGAAGGCCCTTCGGGTGTAAAGCTCTGTTCGGAGGGGACAAAAAT  
CTTAGGGTTAATAGCCCTAGGACTTGATGGTACCCTCAAAGGAAGCACCCGGCTAACTTCG  
TGCCAGCAGCCGCGGTAATACGAAGGGTGCAAGCGTTGCTCGGAATTATTGGGCGTAAAG  
GGTTGGTAGGTGGTTACGTATGTCTGAGGTGAAATCCCTGAGCTCAACTCAGGACGTGCC  
TTGGAACGCGCTAACTAGAGTGCTAGAGAGGTTCTGTGAATTCCTGGTGTAGCGGTGAA  
ATGCGTAGAGATCAGGAGGAACATCAGCGGCGAAGGCGGCGAACTGGATAGTAACTGACA  
CTGAACAACGAAAGCGTGGGGAGCAAACAGGATTAGATACCCGAGTAGTCC

>Otu1424

CCAGCCTATGGGGGGCAGCAGTTTAGAAATTTGCGCAATGGGCGAAAGCCTGACGCAGCG  
ACGCCGCGTGAGGGATGAAGGTCTTCGGATTGTAAACCTCTGTGCAACAAGACGAAAGCT  
TGCCGGTAAATAATCGGCAAGTTTGACGGTACTGTTGGAGGAAGCTATGGCTAACTCTGT  
GCCAGCAGCCGCGGTAATACAGAGGTAGCGAGCGTTGTCCGGAATTACTGGGCGTAAAGG  
GCGTGTAGGCGGCCGGGTAAAGTCTAGTGT TAAACTTTTCAGCTCAACTGAGAGATGTCAC  
TGGATACTGCTTGGCTTGAGGACAGTAGAGGAGAGTGGAATTC CCGGTGTAGCGGTGAAA  
TGCGTAGATATCGGGAGGAACACCTGTGGCGAAGGCGGCTCTCTGGTCTGTCTCTGACGC  
TGAGGCGCGAAAGCTAGGGGAGCAAACGGGATTAGATACCCCTCGTAGTCC

>Otu1426

CCAGCCTACGGGTTGCTCCAGTCGAGGATCTTTGGCAATGAGCGCAAGCTTGACCAAGCG  
ACGCCGCGTGTCGATGAAGGCCCTTCGGGTGTAAAGCACTGTGAGGGGAACGAAGCCG  
AAAGGTTGACCGATCCCTGGAGGAAGCACGGGCTAAGTTCTGTGCCAGCAGCCGCGGTAAG  
ACGAACCGTGCGAACGTTGTTTCGGAATCACTGGGCTTAAAGGGCGCGTAGGCGGCTTGTC

AAGTCAGGGGTGAAATCTTTCGGCTCAACCGGAAAAGTGCCCTTGATACTGACAAGCTCG  
AGGGAGGTAGGGGTGTGTGGAACCTTCTGGTGGAGCGGTGAAATGCGTTGATATCAGAAAG  
AACGCCGGTGCGGAAAGCGACGCACTGGACCTTTTCTGACGCTGAGGCGCGAAAGCTAGG  
GGAGCAAACGGGATTAGAGACCCTTGTAGTCC

>Otu1427

CCAGCCTACGGGTCGCTGCAGTTCGGAATATTTCGGCAATGGACGAAAGTCTGACCGAGCG  
ACGCCGCGTGCGGGATGAAGGCCCTATGGGTTGTAAACCGCTTTCGCGAGTGAGCAAATC  
AAGACTGGCGAACATCCAGTCTGTGTAGTTAAGCTCGTAAAGAAGCCCCGCTAATCAC  
GTGCCAGCAGCGGCGGTAATACGTGAGGGGCGAACGTTGTTTCGGTGTCACTGGGCTTAA  
GGGTGCGTAGGTGGCTTTGTAAAGTAAGGAGTGAAATCCCTCGGCTTACCCGGGGAATTGC  
TTTTATACTGCAAGGCTTGAGGATCAGAGGGGAAAGAGGAACTCCGAGTGATAGCGGTGAA  
ATGCGCAGATATTCGGGGGAAGGCCGGCGGCGAAGGCGTCTTTCTGGCTGATTCTTGACA  
CTGAGGCACGAAAGCGTGGGGAGCAAACAGGATTAGAAACCCCTGTAGTCC

>Otu1432

CCAGCCTATGGGAGGCTGCAGTGAGGAATATTGCACAATGGGCGAAAGCCTGATGCAGCA  
ACGCCGCGTGAGCGATGAAGGCCCTTCGGGTCGTAAAGCTCTTTTGAGAGGGACGAGAACG  
GACGGTACCTCTTGAATAAGTCACGGCTAACTACGTGCCAGCAGCCGCGTAAACGTAG  
GTGGCGAGCGTTATCCGGATTCACTGGGCGTAAAGCGAGTGACGGTGGCCTCGTAAGTTG  
GATGTGAAATTTCCCGGCTTAACCGGGAGCGGTCATTCAATACTGCGGGGCTTGAGGGTA  
GAAGAGGGGGGTGGAATTGCCGGTGTAGTGGTGAATGCGTAGATATCGGCAGGAACACC  
AGTGCGCAAAGCGGCCCCCTGGTTTACTCCTGACACTCAGACTCGAAAGCTAGGGTAGCG  
AACGGGATTAGATACCCAGTAGTCC

>Otu1433

CCAGCCTATGGGTTGCAGCAGCAACGAATCTTCCCCAATGGGCGAAAGCCTGAGGGAGCG  
ACGCCGCGTGAAAGATGAAGTACTTCGGTATGTAAACTTCTTTAGGGGCTACGAAAGCGT  
AAGGACCTAATACGTCCTGAGTTGATCTAGTCCAAAATAAGGGACGGCTAACTCTGTGCC  
AGCAGCCGCGGTAATACAGAGGTCCCAGCGTTACTGAGAATCACTGGGTTTAAAGGGTG  
CGTAGGTGGTCCGTTAAGTCCGTTGTGAAATCCCTGGGCTCAACCCAGGAGCTGCTTCGG  
ATACTGGCGGACTTGAGGCCGGTAGAGGTCACTGGAACCTGACGGTGGAGCGGTGAAATGC  
GTAGATATCGTCAGGAACGCCGGTGGTGAAGACGGGTGACTGGGCCGGTTCTGACACTGA  
GGCACGAAAGCGTGGGGAGCGAACGGGATTAGAGACCCCAAGTAGTCC

>Otu1434

CCAGCCTACGGGTCGCACCAGCTAGGAATTTTCCGCAATGGGCGAAAGCCTGACGGAGCG  
ACACTGCGTTGAGGATTGAAGGCCCTACGGGGTTGTAAACTCATTTTAAGCTAGAAGAGA  
GAGGACTGTATAGCTGGAATAAGCCCCGGCAAACCTACGTGCCAGCAGCCGCGGTAATACG  
TAGGGGGCGAGTATTGTTTCGGATTTACTGGGCATAAAGGGTGCGTAGGCGGGATATCAAG  
CAGGATGTGAAATCTAATGGCTCAACCATTAAATTGCATTCTGAACTGGTATTCTTGAGT  
GCAGCAGGGGAGTGCAGAATTCCCGGTGTAGGGGTGAAATCTATAGATATCGGGAAGAAT  
ACCGGTCGCGAAGCGGCACCTCTGGGCTGTAACCTGACGCTGAGGCACGAAAGCGTGGGGA  
TCGAACCGGATTAGAAACCCCTTGTAGTCC

>Otu1435

CCAGCCTACGGGGGGCAGCAGTTCGGAATATTTCGGCAATGGGCGAAAGCCTGACCGAGCG  
ACGCCGCGTGCGGGATGAAGGCCCTTGGGTTGTAAACCGCTGTCACAGGTGAGCAAATCA  
TGCGCGAGGAACATTCGCGTATGTTGAGTTAAGCTTGAGAGGAAGCCCCGCTAATCACG  
TGCCAGCAGCGGCGGTAATACGTGAGGGGCGAACGTTGTTTCGGTGTCACTGGGCTTAAAG  
GGCGCGTAGGTGGTTGCGTAAGTAAGGTGTGAAAGCCCTCGGCTTACCCGGGGAATTGCG  
CCTTATACTGCGTGACTTGAGGGTCATAGGGGAAGGGGGAACCTCCAGGTGTAGCGGTGAA  
ATGCGCAGATATCTGGGGGAAGGCCGGCGGCGAAGGCGCCCTTCTGGGTGATTCTTGACA  
CTGAGGCGCGAAAGCGTGGGGAGCAAACAGGATTAGAGACCCTCGTAGTCC

>Otu1437

CCAGCCTACGGGGGGCACCAGTGGGGAATTTTGCACAATGCCCCGAAAGGGTGATGCAGCA  
ACGCCGCGTGAGGGATGAAGGCCCTTCGGGTCGTAAACCTCTTTCGACCGGAAAAAATGGT  
CCGCTGAAGAGGCGGGCCTGATGGTACCGGTGGAAGAAGCCCCGGCTAACTACGTGCCAG  
CAGCCGCGGTAATACGTAGGGGGCGAGCGTTGTTTCGGAATTACTGGGCGTAAAGGGCGTG  
TAGGCGGTGCGGTAAGTCGGGCGTGAAATCTCTAGGCTTAACCTGGAGGGGGCCGTTCGAA  
ACTGCCGTGCTAGAGTGCGGGAGGGGGGAAGTGGAATTCCCGGTGTAGCGGTGAAATGCGT  
AGATATCGGGAGGAACACCTGTGGCGAAGGCGGCTTCCTGGACCGCAACTGACGCTGAGG  
CGCGAAAGCTAGGGGAGCAAACAGGATTAGAGACCCTCGTAGTCC

>Otu1438

CCAGCCTATGGGAGGCAGCAGTGGGGAATTTTGCGCAATGGGGGAAACCCTGACGCAGCA  
ACGCCGCGTGAGGATGAAGTCCTTCGGGACGTAAACTCCTTTTCGATCGGGACGATTATG  
ACGGTACCGGAAGAAGAAGCCCCGGCTAACTACGTGCCAGCAGCCGCGGTAACACGTAGG  
GGGCGAGCGTTGTTTCGGAATTACTGGGCGTAAAGCGCGTGTAGGCGGGTCTTTAAGTCAG  
GGGTGAAATGCCAAGGCTCAACCTTGAACTGCCTTTGATACTGGAGATCTTGAGTCCGG  
GAGAGGTGAGTGGAAGTGCAGGTGTAGAGGTGAAATTCGTAGATATTCGCAAGAACACCA  
GTGGCGAAGGCGGCTCACTGGCCCCGGAAGTACGCTGAGACGCGAAAGCGTGGGGAGCAA  
ACAGGATTAGAACCCCTAGTAGTCC

>Otu1440

CCAGCCTACGGGCGCGCACCAGCAACGAATCTTCCCCAATGCCGGAACGGTGAGGGAGCG  
ACGCCGCGTGAAAGGATGAAGTCCTTCGGGATGTAAACTTCTGTTAGGGTTATGAAAGCGT  
AAGGGGCTAATATCCCCTGAGTTGATCTGATCCAGAGAAAGGGACGGCTAACTCTGTGCC  
AGCAGCCGCGGTAATACAGAGGTCCCAAGCGTTACTGAGAATCACTGGGTTTAAAGGGTG  
CGTAGGTGGCGCGTTAAGTCCGTTGTGAAATCCCCGAGCTCAACTCGGGAAGTGCCTTCGG  
ATACTGGCGTGCTTGAGGCCGGTAAGGGTCACTGGAAGTACGCGTGAGCGGTGAAATGC  
GTAGATATCGTCAGGAACGCCGGTGGTGAAGACGGGTGACTAGGCCGGTTCTGACACTGA  
GGCACGAAAGCGTGGGGAGCGAACGGGATTAGAAACCCGCGTAGTCC

>Otu1443

CCAGCCTATGGGGTGCAACAGTCACGAATCTTCCTCAATGGCCGAAAGGCTGAAGGAGCG  
ACGCCGCGTGATGAAGACGCCCTTCGGGGTGTAATACTTTTATCTGGGAAGAAACAA  
TGACGGTACCAGATGAATAAGGAGCTGCTAACCTCGTGCCAGCAGCAGCGGTAATACGAG  
GGCTCCAAGCGTTATCCGGATTTATTGGGCGTAAAGGGTCTGTAGGCGGTTGGTCGCATC  
TCCTGTTAAAGCCCGAGGCTCAACCTCGGAACAGCGGGAGAGATGGACAACTAGAGGCC  
GGGAGAGGCAAAATGGAATTGCTGGTGTAGGGGTAAATCCGTTAATATCAGCAAGAACAC  
CAAACGCGAAGGCATTTTGGCTGGAACGGTCTGACGCTAAGAGACGAAAGCGTGGGTAGC  
GAATGGGATTAGAAACCCCTTGTAGTCC

>Otu1444

CCAGCCTATGGGGTGCAAGCAGGCGCGAAACCTTTACAATGCACGAAAGTGTGATAGGGGG  
ATACTCAGTGCTTACGATTATGTCTGATAGGCTTTTGTCAATCGTAAATAGATTGGCGAATA  
AGTGGTGGGCAAGACCGGTGCCAGCCGCCGCGGTAACCCCGGCCCAAGTGGTCATCG  
CGATTATTGGGCCTAAAGCGTTCGTAGCCGGTTTGGTAAATCTCTTGTGAAATTGTTTCGG  
CTTAACCGAACAGCGTGCAGGAGACACTGCCGAAGTGCAGACCGGGAGGCGTAAGAAGTA  
TTCCATGGGGACTGGTAAATGGGATAATCCATGGAAGACTACCGATGGCGAAGGCATCT  
GACCAGAACGGATCTGACGGTGAGGAACGAAAGCCAGGGGAGCGAACCGGATTAGAAACC  
CCCGTAGTCC

>Otu1448

CCAGCCTACGGGAGGCAGCAGTAGGGAATATTGGTTAATGGGCGAAAGCCTGACCCAGCA  
ACGCCGCGTGATGCGATGAAGTCCTTCGGGATGTAAACCGCTGTCAGGGGTAAAGAAAGTTC  
TGATCTACCCCAGAGGAAGAGACGGCTAACTCTGTGCCAGCAGCCGCGGTAATACAGAGG  
TCTCAAGCGTTAGGCGGAATCACTGGGCTTAAAGCGTGTGTAGGCGGATCGTTAAGTGCC  
TTGTGAAATCCCACGGCTCAACCGTGGAAGTGCCTCGGCATACTGGCGATCTTGAGCCATC  
TAGGGGTTGCTGGAACAAACGGTGAGAGCGGTGAAATGCGTAGATATCGTTTGAACGCCA  
AAGGTGAAACAGGCAACTGGGGATGTGCTGACGCTGAGACACGAAAGCTAGGGGAGCAA  
ACGGGATTAGAAACCCCTGTAGTTCC

>Otu1452

CCAGCCTATGGGGGGCACCAGTGAGGAATATTGCGCAATGGGGGCAACCCTGACGCAGCA  
ACGCCGCGTGAGTGAGGAAGGTTTTTCGGATCGTAAAGCACTGTCGGGAGGGACGAATAAG  
GCGGCGGCTAACATCCGCAGCCGATGACGGTACCTCCAAAGGAAGCACCGGCTAACTCTG  
TGCCAGCAGCCGCGGTAATACAGAGGGTGTAGCGTTGTTTCGGAATTATTGGGCGTAAAG  
CGCGTGTAGGCGGCCTTGCAAGTTGGGTGTGAAAGCCCTCGGCTTAACCGAGGAAGTGCG  
CCCAAACTACAGGGCTTGAGTGCCGGAGAGGGTGGCGGAATTCCCGGTGTAGAGGTGAA  
ATTCGTAGATATCGGGAGGAACACCAGCGGCGAAGGCGGCCACCTGGACGGTAACTGACG  
CTGAGACGCGAAAGCGTGGGTAGCAAACAGGATTAGAAACCCGTGTAGTCC

>Otu1453

CCAGCCTATGGGGCGCTCCAGTGGGGAATCTTGCGCAATGGGCGAAAGCCTGACGCAGCA  
ACGCCGCGTGAGTGATGAAGGTCTTCGGATCGTAAAGCTCTGTCTGGAGGGAACGATGCCG  
TCGTTGGCCAATATCCAACGGTGGTGACGGTACTCTCAAAGGAAGCACCGGCTAACTCTG

TGCCAGCAGCCGCGGTAAGACAGAGGGTGCAAGCGTTGTTTCGGAATTATTGGGCGTAAAG  
GGCGCGTAGGCGGCAGCGTAAGTCAGGCGTGAAAGCCCGGGGCTTAACCCCGGAAGTGCG  
CCTGATACTGCGGTGCTTGAGTCCCGGAGAGGGTGGTGGAAATCCCAGTGTAGAGGTGAA  
ATTCGTAGATATTGGGAGGAATACCGGTGGCGAAGGCGACCACCTGGACGGAGACTGACG  
CTGAGGCGCGAAAGCGTGGGGAGCAAACAGGATTAGAAACCCAGTAGTCC

>Otu1455

CCAGCCTACGGGTCGCTGCAGTCGAGAATCTTCCGCAATGGACGAAAGTCTGACGGAGCG  
ATGTCGCGTGATGGATGAAGTTCTTAGGAACGTAAACATCTTTTATCGGGGAGAAAATTT  
TGATAGTACCCGATGAATAAGGGGTTGCTAAACTCGTGCCAGCAGCAGCGGTAATACGAG  
TGCCCCAAGCGTTATCCGGAATTACTGGGCGTAAAGCGTGTGTAGGCGGCGTGATTAGTC  
TTTGGTCAAAGCTCCCGGCTTAACCGGGAAAAGGCCGGAGAAACGGTCACACTAGAGGGT  
GCGAAAGGTCTATGGAACCTCATGGTGTAGGAGTGAAATCCGTTGATATCATGGGGAACAC  
CGAAAGCGAAGGCAATAGACTGGCGCATTACTGACGCTGCAACACGAAAGCGTGGGGATC  
AAACGGGATTAGATACCCTTGTAGTCC

>Otu1459

CCAGCCTATGGGATGCTCCAGTCGAGAATCATTCGCAATGGGCGCAAGCCTGACGATGCG  
ACGCCGCGTGACAGGATGAAGTCTTCGGATTGTAAACTGCTGTGATGGGGGAGCAATGCA  
GAACGTGCCAACACCACGTACTGTTGATAGTACCCCAAGAGGAAGCCACGGCTAACTCTG  
TGCCAGCAGCCGCGGTAATACAGAGGTGGCAAGCGTTGTTTCGGATTTACTGGGCGTAAAG  
GGTGCCTAGGCGGTCTTGTGTGTCGGATGTGAAATCCACGGATCATCCGTGGAACCTGCA  
TTCGAAACTGCAGGGCTGGAGTGCAGGAGAGGAAAGTGGAATTCTCGGTGTAGCGGTGAA  
ATGCGTTGATATCGAGAGGAACGCCGGAGGCGAAGGCGACTTTCTGGACTGCAACTGACG  
CTGAGGCACGAAAGCTAGGGGAGCAAACAGGATTAGAAACCCCGTAGTCC

>Otu1464

CCAGCCTATGGGTCGCTGCAGTCGAGGATCTTTCGCAATGGGCGCAAGCCTGACGAAGCG  
ACGCCGTGTGAGTGAAGAAGGCCTTTGGGTTGTAAAGCTCTTTCGCCTGGGAACAAGAGG  
ATTTGGTGAATAACTGAATACTTTGAGGGTACTAGGTAAAGAAGCACCCGGCTAACTCCGT  
GCCAGCAGCTGCGGTAATACGGAGGGTGCAAGCATTAATCGGATTTACTGGGCGTAAAGG  
GCGCGTAGGCGGTATGCCAAGTCATTTGTGAAATTTTCGCGGCTCAACCGCGAAGCTGCAA  
GTGAGACTGGTGAAGTAGAGGATAAGCGGAGAAAATGGAATTCACATGTAGCGGTGAAA  
TGCGTAGATATGTGGAGGAACACCCGAGGCGAAAGCGGTTTCTAGCTTACCCCTGACGC  
TGAAGCGCGAAAGCAAGGGGATCAAACAGGATTAGATACCCGTGTAGTCC

>Otu1469

CCAGCCTATGGGGGCACCAGTGGGGAATATTGCGCAATGGGCGAAAGCCTGACGCAGCAA  
CGCCGCGTGAGTGATGAAGGTCTTCGGATTGTAAAGCTCTGTTGAATGGGAAGAATAACT  
CCGTAAATAATACGTACGGAGGATGACGGTACCATTTCGAGGAAGCCCCGGCTAACTACGT  
GCCAGCAGCCGCGGTAATACGTAGGGGGCAAGCGTTGTTTCGGAATCACTGGGCGTAAGGG  
AGCGTAGGCGGATTGGTAAGTTAGGAGTGAAATCTACAGGCTTAACCTGTACGATTGCTT  
TTAATACTGCCTTTCTTGAGTATTGGAGAGGATGATGGAATTCAGGTGTAGCGGTGGA  
TGCGTAGATATCTGGAAGAACACCAGTTGCGAAGGCGGTCATCTGGCCAAATACTGACGC  
TGAGGCTCGAAAGCTAGGGGAGCAAACAGGATTAGAGACCCCGTAGTCC

>Otu1474

CCAGCCTATGGGGGGCACCAGTGAGGAATATTGGGCAATGCCCGGAAGGGTGACCCAGCA  
ACGCCGCGTGAGGATGGCGGCCGTAAGGTTGTAAACTCCTCTTGAAGGGGACGAAAGAC  
CAAATTTTCGTAAGGGATTTGGGTTGACTGTACCCTTAGAAGAAGCCCCGGCTAACTACGT  
GCCAGCAGCCGCGGTAATACGTAGGGGGCAAGCGTTGTCCGGATTTACTGGGTGTAAAGG  
GCGCGTAGGCGGGTTTGTAAAGTCAGTGGTGAAATCCTGCAGCTTAACCTGCAGAACTGCCA  
TTGATACTGCAAATCTTGAGTTCGGAAGAGAGAAGCGGAATTCAGGTGTGGTGGTGAAA  
TACGTAGATATCTGGAAGAACACCAGTTGGCGAAGGCGGCTTCTTGGTCCGTAACCTGACGC  
TGAGGCGCGAAAGCGTGGGGATCAAACAGGATTAGATACCCGAGTAGTCC

>Otu1476

CCAGCCTATGGGGGGCACCAGTGGGGAATTTTGGACAATGGGCGAAAGCCTGATCCAGCG  
ACGCCGCGTGAGGATGAAGGCCTTCGGGTTGTAAACTCCTTTTAGAGGGAACGAATAAA  
TTGACGGTACCCCTCAGAAAAAGCCACGGCTAACTACGTGCCAGCAGCCGCGGTAATACGT  
AGGTGGCGAGCGTTACTCGGAATTACTAGGCGTAAAGCGCTTGTAGGTGGTTGGATAAGT  
CTGTTGTGAAATTTACGGCTTAACCTGTGAAAGTGCAACGGAACTATCCGGCTTGAGTG  
TGGTAGGGGTTGACGGAATTCGCGGTGTAGCGGTGAAATGCGTAGATATCGGGAGGAACA  
CCAATGGCGAAAGCAGTCAACTGGGCCAATACTGACACTGAGGAGCGAAAGCTAGGGGAG



CAAACAGGATTAGAAACCCAGTAGTCC

>Otu1478

CCAGCCTACGGGGGGCTCCAGTGAGGAATATTGCGCAATGGGCGAAAGCCTGACGCAGCG  
ACGCCGCGTGGGTGACGAAGGCCTTCGGGTCGTAAAACCCCTTTTGGTGGGGACGAGTGAG  
GACGGTACCCATCGAATAAGTCTCGGCTAACTACGTGCCAGCAGCCGCGGTAAAACGTAG  
GAGGCGAGCGTTATCCGGATTCACTGGGCGTAAAGCGCGCGTAGGCGGTAGGTAAGTCG  
GACGTTAAAGCCCCTGGCTCAACTGGGGGAGGTCGTTTCGATACTGCTTGGCTTGAGGATG  
AGAGAGGAAAGCGGAATTCCCGGTGTCGCGGTGGAATGCGTAGAGATCGGGAGGAACACC  
AGTGCGCAAGGCGGCTTTCTGGTTCATTTCTGACGCTGATAGCGCGAAAGCGTGGGGAGC  
AAACGGGATTAGATACCCCTGTAGTCC

>Otu1479

CCAGCCTATGGGTTGCAGCAGTTAGGAATCATCTGCAATGCGCGAAAGCGTGACAGTTTG  
AACCAGAGTGCTTTTTCATTTGAAAAGCTTTTGCCAAATGTAAAAAGTTTGGCGAATAAGG  
ACTGGGTAAAGACGAGTGCCAGCCGCCGCGGTAACTACTCGCGGTCCAAGTCGCAGCCATCT  
TTATTGGGTCTAAAACATCCGTAGCTTGCTGGTAAGTCCCTTGTGAAATCTTGGCTCTT  
AAGGTCAAGGCGTGCAAGGGGTACTGTCAGGCTAGAGACCGGCAGACGTAAGAAGTATGT  
TCGAAGTAGCGGTAAAATGCATTAATCTCGAACAGACTCACAACAGCGAAGGCATCTTAC  
GAGGACGGTTCTGACTGTCAGGGATGAAGGCTAGGGGCGCAAACGGATTAGATACCCTA  
GTAGTCC

>Otu1482

CCAGCCTACGGGGGGCTGCAGTGGGGAATCTTCCGCAATGGACGCAAGTCTGACGGAGCG  
ACGCCGCGTGACAGGATGAAGGCCTTCGGGTGTAAACTGCTTTCGAAAGGGAATAAGTGC  
AGCAGGCGAATAGTACTGCTGTTTGACTGTACCTTAGGAAGAAGCTACGGCTAACTCTGT  
GCCAGCAGCCGCGGTAAATACAGAGGTAGCAAGCGTTGTCCGGATTCACTGGGCGTAAAGG  
ACGTGTAGGCGGCCCTATAAGTCGGGTGTGAAATCGTTCTGCTTAACAGAACAATTGCTC  
CCGATACTGTTTGGCTTGAGTGCAGGAGGGGAAAATGGAATTTCCGGGTGTAGCGGTGGAA  
TGCGTAGATATCGGAAAGAACACCCGTGGCGAAGGCGGTTTTCTGGCCTGCAACTGACGC  
TGAGGCGTAAAAGCTAGGGGAGCAAACGGGATTAGAAACCCGCGTAGTCC

>Otu1483

CCAGCCTATGGGTTGCTGCAGCAACGAATCTTCCCAATGGGCGAAAGCCTGAGGGAGCG  
ACGCCGCGTGTAGGATGAAGTTCTTCGGAATGTAACTACTGTTAGGGTTTTGAAAGCGA  
TGCGCCATAACATGGCGCAAAGTTGATCTAGCCCAGAGAAAGGGACGGCTAACTCTGTGC  
CAGCAGCCGCGGTAAATACAGAGGTCCCGAGCGTTACTGAGAATCACTGGGTTTTAAAGGGT  
GCGTAGGTGGTCCGTTAAGTCCGTTGTGAAATCCCTTGGCTCAACCAAGGAAGTCTTCG  
GATACTGGCGGACTTGAGGCCGGTATGGGTCACTGGAAGTACGGGTGGAGCGGTGAAATG  
CGTAGATATCGTCAGGAACGCCGTGGTGAAGACGGGTGACTGGGCCGGTTCTGACACTG  
AGGCACGAAAGCGTGGGGAGCGAACGGGATTAGATACCCCGTAGTCC

>Otu1488

CCAGCCTATGGGACGCAGCAGTCGAGAATTTTCCGCAATGGGCGAAAGCCTGACGGAGCG  
ACGCCGCGTGAGGAGACGAAGTTCTTCGGAATGTAACTCCTTTTGCCAGGGAAAAAGTTA  
TTGATTGTACCTGGAGAATAAGAAGTTGCTAAACTCGTGCCAGCAGCAGCGGTAAATACGA  
GTGCTTCAAGCGTTATCCGGAATCATTGGGCGTAAAGGGTGTGTAGGCGGTAAATGTTAGT  
CTCCTGTCAAATCTTTCGGCTCAACCGAGAGTCCGCAGAGGAAACGGCATAACTAAGAGG  
ACGGAAGAGGTCTCTGGAAGTCAATGGTGTAGCGGTGAAATGCGTTGATATCATGGGGAAC  
ACCAAAAGCGAAGGCAAGAGACTGGTCCGCTCCCGACGCTGAAACACGAAAGCGTGGGTC  
GCGAATGGGATTAGAGACCCCTGTAGTCC

>Otu1489

CCAGCCTATGGGGGGCTGCAGTGGGGAATTTTTCGCAATGGGCGAAAGCCTGACGCAGCG  
ACGCCGCGTGGGTGACGAAGGCCTTCGGGTCGTAAAGCCCTGTGGGGAGGAACGAACCGG  
CATCGGGCTAATATCCTGGTGCCCTGACGGTACCTTCTTAGCAAGCACCGGCTAACTCTG  
TGCCAGCAGCCGCGGTAAAGACAGAGGGTGCAAACGTTGCTCGGAATTACTGGGCGTAAAG  
CGCGTGTAGGTGGTCTGGTAAGTCCGGTGTGAAAGCCAGGGCTTAACCCCTGGAAGTGCA  
TTCGAAACTGCCAGGCTAGAGTACTGAAGAGGACAGCGGAATTCCCGGTGTAGAGGTGAA  
ATTCGTAGATATCGGGAGGAACACCAAGTGGCGAAGGCGGCTGTCTGGGCAGATACTGACA  
CTGAGACGCGAAAGCGTGGGAAGCAAACAGGATTAGATACCCAGTAGTCC

>Otu1491

CCAGCCTATGGGAGGCAGCAGTCGAGAATCTTCCGCAATGGACGAAAGTCTGACGGAGCG  
ACGCCGCGTGACTGATGAAGACCCTACGGGTCGTAAAGGTCTTTTATGAGGGAAGAAGTT

TATTGACGGTACCTCATGAATAAGAGGCTCCTAATCTCGTGCCAGCAGGAGCGGTAATAC  
GAGAGCCTCGAGCGTTATCCGGAATTATTGGGCGTAAAGGGTGAGTAGGCGGCGCTGTTA  
GTCGAGTGTTAAATCTCCGGGCTTAACCTGGAACCGCATTCGAAACGGCAGTGCTTGAG  
ATAAGAAGAGGTGTGCAGAACTCAAGGTGTAGGGGTGAAATCCGTTGATATCTTGGGGAA  
TACCAAAAGCGAAGGCAGCACACTGGTCTTTATCTGACGCTGAATCACGAAAGCGTGGGT  
AGCGAATGGGATTAGAAACCCAGTAGTCC

>Otu1492

CCAGCCTATGGGACGCTCCAGTGGGGAATTTTGCGCAATGGGCGAAAGCCTGACGCAGCA  
ACGCCGCGTGAGGATGAAGGCCTTCGGGTCGTAAACTCCTGTCAGGGGGGACGAAAAAA  
ATGACTGTACCCCTTGAGGAAGCCACGGCTAACTCCGTGCCAGCAGCCGCGGTAATACGG  
AGGTGGCAAGCGTTGTTTCGGAATTACTGGGCGTAAAGGGCGCGTAGGCGGCTTTACAAGT  
CAGATGTGAAAGCCCTGGGCTTAACCCAGGAATTGCATCTGAAACTGTTTTGCTTGAGTC  
CTGGAGGGGGTAGTGGAATTTCCAGTGTAGCGGTGAAATGCGTAGATATTGGGAGGAACA  
CCTGTGGCGAAGGCGGCTACCTGGACAGTGACTGACGCTGATGCGCGAAAGCTAGGGGAG  
CAAACGGGATTAGAAACCCCTTGTAGTCC

>Otu1493

CCAGCCTACGGGGGGGAGCAGTAGGGAATATTGCTCAATGGGGGAAACCCTGAAGCAGCA  
ACGCCGCGTGAGTGATGAAGGCCTTCGGGTCGTAAAGCTCTGTTGTACGGGAAGAACGCG  
GGTATGGCTAACATCCATATCCAGTGACGGTACCGTATAAGAAAGGACCGGCTAACTTCG  
TGCCAGCAGCCGCGGTAAGACGGGGGGTCCTAGCGTTGTTTCGGAATTATTGGGCGTAAAG  
CGTGTGCAGGTGGTTTTGGTAAGTTGGATGTGAAAGCCCCGGGCTTAACCTCGGGAAGTGCA  
TCCAAACTCCCAAACCTTGAGTATGGAAGAGGGTTCGTGGAATTCCTGGTGTAGTGGTGAA  
ATACGTAGATATCAGGAGGAACACCGGCGGCGAAGGCGGCGACCTGGTCTATACTGACA  
CTCATACACGAAAGCGTGGGTAGCAAACAGGATTAGAAACCCTTGTAGTCC

>Otu1496

CCAGCCTACGGGGTGTCAGCAGTCGAGGAAAATTTTTCAATGCCCCGCAAGGGTGAACGAGTA  
AGCCAGAGTGTTTTCTTTACGAAAACCTTTTGCCTGATGCAAAAAGTCAGGCGAATAAGGA  
CTGGGCAAGACCGGTGCCAGCCGCCGCGGTAATCCCGGCGGTCCAAGTCGCATCCACAAT  
TATTGGGTCTAAAACATTTCGTAGCTTGTTTTTTAAGTCTCTTGTGAAATTCCATATCTCA  
AGTATGGAGCGTGCAAGAGATACTATTTAACTAGAGACCGGAAGACGCAAAGAGTACGAC  
GGAGGTAGCGGTAAAATGTGTAACTCTTTGTCGGACTAACAATGGCGAAGGCACCTTTGCG  
AGTACGGATCTGACAGTGAGGAATGAAGGCTAGGGGCGCAAAGGGATTAGATACCCGGG  
TAGTCC

>Otu1497

CCAGCCTACGGGTTGCTGTCAGTGGGGAATATTGGACAATGGGCGAAAGCCTGATCCAGCA  
ATGCCGCGTGTTGAAGAAGGCCTTCGGGTTGTAAAGCACTTTAGGTGCGAAAGAAAAAG  
CTTCACCTAATACGTGAAGCCTTGACGGTACCGACAGAATAAGCACCGGCTAACTCTGTG  
CCAGCAGCCGCGGTAATACAGAGGGTGCAAGCGTTAATCGGATTTACTGGGCGTAAAGCG  
TGCGTAGGCGGTTTGTTAAGTCGGTTGTGAAAGCCCTGGGCTCAACCTGGGAATTGCAGT  
CGATACTGGCAGACTAGAGAACGGTAGAGGGAGGCGGAACTCCAGGTGTAGCAGTGAAAT  
GCGTAGATATCTGGAAGAACACCGATGGCGAAGGCAACCTCCTGGGCCTGTTCTGACGCT  
GAGGCACGAAAGCGTGGGGAGCAAACAGGATTAGAGACCCGAGTAGTCC

>Otu1499

CCAGCCTACGGGTTGTCAGCAGTGGGGAATATTGGACAATGGGCGCAAGCCTGATCCAGCA  
ATGTCGCGTGAATGATGAAGGCCTTAGGGTTGTAAAGTTCTTTTCGGCGGGGAAGAAATTG  
ACGGTACCCGCGAGAAGAAGCTCCGGCTAACTCCGTGCCAGCAGCCGCGGTGATACGGGGG  
GAGCTAGCGTTTTTTCGGAATTACTGGGCGTAAAGGGCGCGTAGGCGGCCAATAAAGTTGA  
AAGTGAAAGCCCCGGGCTTAACCCGGGAACTGCTTTCAAAACTCATTGGCTAGAGGATGA  
CAGAGGACAGTAGAATTCCTAGTGTAGAGGTGAAATTCCTTAGATATTAGGAAGAATACCA  
GAGGCGAAGGCGACTGTCTGGGTCATATCTGACGCTGAGGCGCGAAAGCGTGGGGAGCAA  
ACAGGATTAGATACCCGCGTAGTCC

>Otu1500

CCAGCCTATGGGTTGCTGTCAGTGGGGAATCTTGCGCAATGGACGAAAGTCTGACGCAGCC  
ACGCCGCGTGAGTGAAGAAGGCCTTCGGGTTGTAGAGCTCTGTCTGGGAGGGACGAAAACT  
TTTGCGGTTAATAGCCGCGAGAAATTGACGGTACCTTCAAAGGAAGCACCGGCTAACTCCG  
TGCCAGCAGCCGCGGTAATACGGAGGGTGCAAGCGTTGCTCGGAATTATTGGGCGTAAAG  
GGTAGGTAGGTGGTCTCATTTGTGAGGGGTGAAAGCCTTGGGCTTAACCCAAGAAGTGCC  
CCTGAAACGGTGAGACTGGAGTACTGGAGAGGGTTCGTGGAATTCCTGGTGTAGCGGTGAA

ATGCGTAGAGATCGGGAGGAACACCAGAGGCGAAGGCGGCGACCTGGACAGTTACTGACA  
CTCAACTACGAAAGCGTGGGGAGCAAACAGGATTAGAAACCCGAGTAGTCC  
>Otu1501  
CCAGCCTATGGGTGGCAGCAGTCAAGAACATTCCGCAATGGACGAAAGTCTGACGGAGCG  
ACGCCGCGTGACAGGAAGAAGGCCTTCGGGTGTAAACTGCTTTTTCGCTGGGAAGAAATTT  
GACGGTACCACGAGAATAAGGGGTTGCTAACTCTGTGCCAGCAGCAGCGGTAATACAGAG  
ACCCCGAGCGGTATCCGGAATTACTGGGCGTAAAGCGCAAGTAGTCGGTTTTTATAGTCT  
GATGTTAAATCTCACGGCTCAACTGTGAGACTGCATCGGAAACGTAAAGACTAGAGCAAA  
TCAGAGGCAAGCGGAACGTGTGGTGTAGCGGTGAAATGCGTTGATATCACACGGAACACC  
AAAAGCGAAGGCAGCTTGCTAGGGTTTTGCTGACGATCAGTTGCGAAAGCGTGGGGATCA  
AAAAGGATTAGATACCCTAGTAGTCC  
>Otu1502  
CCAGCCTATGGGGGGCTGCAGTGGGGAATTTTTCGCAATGGGGGAAACCCTGACGCAGCC  
ATGCCGCGTGAACGATGAAGGCCTTCGGGTGTAAAGTTCTTTTGACGGGGAAGATGATG  
ACTGTACCCGTAGAATAAGCACCGGCTAACTTCGTGCCAGCAGCCGCGGTAATACGAAGG  
GTGCTAGCGTTGTTTCGGAATTACTGGGCGTAAAGGGCGCGTAGGCGGCTTGGAAGTTGG  
ATGTGAAAGCCCAGGGCTCAACCCTGGAATTGCATTCAAGACTGCTTTGCTTGAATTCGG  
TAGAGGTTGGTGAATTCCCACTGTAGAGGTGAAATTCGTAGAGATTGGGAAGAACGCCC  
GTGGCGAAGGCGGCAACTGGACCGACATTGACGCTGAGGCGCGAAAGCGTGGGGATCAA  
ACAGGATTAGAAACCCTCGTAGTCC  
>Otu1504  
CCAGCCTACGGGTGGCAGCAGTCGAGAATCTTCCACAATGGACGAAAGTCTGATGGAGCG  
ACGCCGCGTGGTTGATGAAGTCCTTCGGGATGTAAAAACCTTTTATGAGGGAGAAAGTTA  
TTGATAGTACCTCATGAATAAGGGGTTGCTAAACTCGTGCCAGCAGCAGCGGTAATACGA  
GTGCCCCAAGCATTATCCGGAATTATTGGGCGTAAAGGGTTGTAGGTGGTTCTATTAGT  
CTTGTGTTAAAGCTCCTGGCTCAACTGGGAACGTGCATGAGAAACGGTAGAACTAGAGGA  
TGCGAGAGGTGTGTAGAACTCATAGTGTAGGGGTGAAATCCGTTGATATTATGGGGAATA  
CCAAAAGCGAAGGCAGCACACTGGCGCACTCCTGACACTGAAAAACGAAAGCGTGGGTAG  
CGAATGGGATTAGATACCCGAGTAGTCC  
>Otu1509  
CCAGCCTATGGGGGGCACCAGTGGGGAATATTGGGCAATGGGCGAAAGCCTGACCCAGCG  
ACGCCATGTGGGTGATGAAGGCCTTCGGGTGTAAAGCCCTGTTAGGTGGGAAGAAGGGT  
CCAGAGGTAAATAATTTCTGGATTTTTCGCGTACCACCGGAGAAAGCACCGGCTAACTCC  
GTGCCAGCAGCCGCGGTAATACGGAGGGTGCAAGCGTTGTTTCGGAATTACTGGGCGTAAA  
GGGCGTGTAGGCGGTAATGTAAGTCAGACGTGAAATCCTTTGGCTCAACTGAAGAACTGC  
GTCTGAAACTGCATGACTAGAGTGCAGAAGAGGGAAACGGAATTCCTGGTGTAGAGGTGA  
AATTCGTAGATATCAGGAGGAACACCGGTGGCGAAGGCGGTTTCTGGTCTGACACTGAC  
GCTGAGGCGCGAAAGCGTGGGGAGCAAACAGGATTAGATACCCCTGTAGTCC  
>Otu1511  
CCAGCCTACGGGAGGCTGCAGTGTAGAATTTTGGACAATGTGTGAAAACATGATTCAGTA  
ATATTTTCATAAGTGAAAATAAGACAGTATTATCACTGTAAAACCTTTTTTGTAAAGAAAAA  
TTATGATTGTACTTAAAGAATAAGCACTGGCTAATTCTGTGCCAGCAGCCGCGGTAATAC  
AGAAAGTGCAAGCATTGTTTCATCTTAATTGGGTGTAAAGAATATGTAGGTTTAAAGATATA  
TAAAATTTTGAAATTTTCAAAAAATTTGAGAAAAAAAATTTTACATACTTATATGAGTTC  
AAAAAAGGTTTAAAGAATTTTATATGTAAGGGTAGAATCTCTAAAAATATAAAGGAATAC  
TAAAGTAGTTGTGAAAACATTTTCTAAAAATGAACTGACGCTGAGATATGAAAGTATAGG  
GATCAAATAGGATTAGAAACCCCGGTAGTCC  
>Otu1513  
CCAGCCTATGGGTGCGCAGCAGTGAGGAATATTGCGCAATGGCCGAAAGGCTGACGCAGCG  
ACGCCGCGTGAGGGATGAAGTCCGTTAGGATGTAAACCTCTTTTGCAGGGGATGAATAGT  
CCCTTTCAGGGATCTGACAGTACCCTGCGAATAAGGATCGGCTAACTACGTGCCAGCAGC  
CGCGGTAATACGTAGGATCCGAGCGTTGTCCGGATTTACTGGGTGTAAAGGGCGTGTAGG  
TGGACCTTTAAGTCGATGGTGAAATCCTGCGGCTCAACCGCAGAATTGCTTTCGAAACTG  
GAGGTCTTGAGTGCGGCAGAGGGAGATGGAATTCATGGTGTAGCGGTGAAATGTGTAGAT  
ATCATGAAGAACACCAGTAGCGAAGGCGGTCTCCTGGTCCGTAACCTGACACTGAGGCGCG  
AAAGCGTGGGGAGCAAACAGGATTAGAAACCCCTGTAGTCC  
>Otu1519  
CCAGCCTATGGGACGCTGCAGTAGGGAATATTGGGCAATGGGCGAGAGCCTGACCCAGCC

ATGCCGCGTGAAGGAAGAAGGCCTTATGGGTTGTAACTTCTTTTGATCGGGAACAAAGA  
GACCCTGCGGGGTAAGAAGAGTGTACCGATAGAATAAGCACCGGCTAACTCCGTGCCAGC  
AGCCGCGGTAATACGGAGGGTGCAAGCGTTGTCCGGATTTATTGGGTTTAAAGGGTGCGT  
AGGCGGCTTTTTAAGTCAGTGGTGAAATACAGCAGCTCAACTGTTGAGGTGCCATTGATA  
CTGAAGAGCTTGAGTACAGATGAGGTAGGCGGAATTTATGGTGTAGCGGTGAAATGCATA  
GATACCATAAAGAACACCGATTGCGAAGGCAGCTTACTAAGCTGTAAGTACGCTGAGGC  
ACGAAAGCGTGCGGAGCGAACAGGATTAGAGACCCTCGTAGTCC

>Otu1520

CCAGCCTATGGGTGGCAGCAGTGAGGAATATTGCTCAATGGGCGAAAGCCTGAAGCAGCA  
ACGCCGCGTGCGCGGTGAAGGCCTTCGGGTCGTAAAGCGCTTTTGAGAGGGACGAGATAG  
GACGGTACCTCTGGAATAAGTCACGGCTAACTACGTGCCAGCAGCCGCGGTAAAACGTAG  
GTGGCAAGCGTTATCCGGATTCACTGGGCGTAAAGCGCGTGCAGGTGGTTCTGTAAGTTG  
GATGTTAAATCTTCGGCCCTAACCGGGAGCGGTCATTCAATACTGCAGGACTTGAGGGCA  
GAAGAGGGGGGTGGAATTGCCGGTGTAGTGGTGAAATGCGTAGATATCGGCAGGAACACC  
TGTGGCGAAAGCGGCCCTTGGTCTGCTCCTGACACTCAGACGCGAAGGCTAGGGTAGTG  
AACGGGATTAGATACCCAGTAGTCC

>Otu1524

CCAGCCTATGGGGGGCAGCAGTCGAGGACCTTCGGCAATGGGCGCAAGCCTGACCGAGCG  
ACGCCGCGTGTCGATGAAGGCCTTCGGGTTGTAAAGCACTGTCGAGGGGGAGAAAAGGG  
CAACCTTGATCGACCCCTGGAGGAAGCACGGGCTAAGTTCGTGCCAGCAGCCGCGGTAAAG  
ACGAACCGTGCGAACGTTGTTTCGGAATCACTGGGCTTAAAGGGCGCGTAGGCGGGCGGTC  
AAGTCAGAGGTGAAATCCCACGGCTCAACCGTGGAAGCGCCCTGATACTGATTGTCTCG  
AGGGAGGTAGGGGCGTGCGGAACCTTCGGTGGAGCGGTGAAATGCGTAGATATCGGAAGG  
AACACCGGTGGCGAAAGCGGCGCGCTGGACCTTTACTGACGCTGAGGCGCGAAAGCCAGG  
GGAGCAAACGGGATTAGATACCCGTGTAGTCC

>Otu1525

CCAGCCTACGGGTGGCAGCAGTCGAGAATTTTTCTCAATGGGCGAAAGCCTGAAGGAGCG  
ACGCCGCGTGCGGGATGAAGGGCTTCGGCTCGTAAACCCCTGTCATTTGCGAACAAACCT  
TTTCATTTAACAGATGAAAAGCTGATTGTAGCGAAAGAGGAAGGGACGGCTAACTCTGTG  
CCAGCAGCCGCGGTAATACAGAGGTCCCAAGCGTTGTTTCGGATTCACTGGGCGTAAAGGG  
TGCGCAGGTGGCAGGTTGAGTTTGGCGTGAAATCTCCGGGCTCAACCCGGAATGCGTT  
GAATACTCTCTCGCTAGAGGGTTGGAGGGGAGACTGGAATTCTCGGTGTAGCAGTGAAT  
GCGTAGATATCGAGAGGAACACCAGTGGCGAAGGCGAGTCTCTGGACAACCTCTGACACT  
GAGGCACGAAAGCTAGGGGAGCAAACAGGATTAGATACCCAGTAGTCC

>Otu1526

CCAGCCTACGGGTTGCAGCAGTGGGGAATATTGGACAATGGGGGCAACCCTGATCCAGCG  
ACGCCGCGTGTTGAAGAAGGCCTGCGGGTTGTAAAGCACTTTTGGCAGGGACGATGATG  
GCGGTACCTGCAGAATAAGCCCCGGCTAACTTCGTGCCAGCAGCCGCGGTAATACGAAGG  
GGGCTAGCGTTGCTCGGAATGACTGGGCGTAAAGGGCGCGTAGGCGGCTGTCACAGTCAG  
AAGTGAAATTCTGGGCTCAACCTGGGGACTGCTTTTGATACGTGGCGGCTTGAGTGAGG  
AAGAGGGTTGCGGAATTTCCAGTGTAGAGGTGAAATTCGTAGATATTGGAAGAACACCG  
GTGGCGAAGGCGGCAACCTGGTCCTTTACTGACGCTGAGGCGCGAAAGCGTGGGGAGCAA  
ACAGGATTAGATACCCCTTGTAGTCC

>Otu1529

CCAGCCTACGGGTCGCTGCAGTGGGGAATATTGGACAATGGGCGCAAGCCTGATCCAGCA  
ATGCCGCGTGAGTGAAGAAGGTCTTCGGATTGTAAAGCTCTTTCGGCGGGGACGATGATG  
ACGGTACCCGCGAGAAGAAGCCCCGGCTAACTTCGTGCCAGCAGCCGCGGTAATACGAAGG  
GGGCTAGCGTTGCTCGGAATGACTGGGCGTAAAGGGCGCGTAGGCGGCTGTCATAGTCAG  
ATGTGAAATTCCTGGGCTTAACCTGGGGGCTGCATTTGATACGTGGCGGCTAGAGTGCGG  
AAGAGGGTCGTGGAATTCAGTGTAGAGGTGAAATTCGTAGATATCAGGAGGAACACCT  
GTGGTGTAGACAGCTTACTGGACCATCACTGACACTGAGACACGAAAGCGTGGGTAGCAA  
ACAGGATTAGATACCCCTGGTAGTCC

>Otu1530

CCAGCCTACGGGGGGCAGCAGTAGGGAATTTCCACAATGGGCGCAAGCCTGATGGAGCA  
ACGCCGCGTGCAAGGATGAATGTCTTCGGATTGTAAACTGCTTTTCTCTGTGACGAATATG  
ACGGTAGCAGAGGAATAAGGACCTGCTAACTACGTGCCAGCAGCCGCGGTCATACGTAGG  
GTCCAAGCGTTATCCGGAATTACTGGGCGTAAAGAGTTGCGTAGGTGGCATAGTAAGCGG  
GTAGTGAAATTGTGTGGCTCAACCATAACCCATTACCTGAACTGCTAAGCTAGAGGACG

AGAGAGGTTATTGGAATTCCTGTGTAGGAGTGAAATCCGTAGATATAGGGAGGAACACC  
GATGGCGTAGGCAGATAACTGGCTCGTTTCTGACACTAAGGCACGAAAGCGTGGGGAGCA  
AACGGGATTAGATACCCGTGTAGTCC

>Otu1531

CCAGCCTACGGGTCGCTGCAGTCGAGAATCTTCCGCAATGGACGAAAGTCTGACGGAGCG  
ACGCCGCGCGGAGGATGAAGTGCTTCGGCATGTAACTCCTTTTGCCAGGGAAAAAGTCT  
ATTGATTGTACCTGGAGAATAAGAGGTTGCTAACTCGTGCCAGCAGCAGCGGTAATACG  
AGTGCCTCGAGCGTTATCCGGAATTATTGGGCGTAAAGGGTGCGTAGGTGGTCGTGTAG  
TCTTGTGTTAAATTTCTCGGCTCAACCGGGAAGCTGCACGGGAAACGGCACGACTCAGAG  
GTTGGAAGGGGTTTTCGGAACCTCATAGTGTAGCGGTGAAATGCGTTGATATTATGGGGAA  
CACCAAAGCGAAGGCAGCAAACCTGGTCCACACCTGACACTGAAGCACGAAAGCGTGGGT  
CGCGAATGGGATTAGATACCCCTGTAGTCC

>Otu1532

CCAGCCTACGGGACGCTGCAGTTAGGGAATTTTCACACTGGGCGCAAGCCTGATGGAGCA  
ACGCCGCGTGGGCGATGAAGGCCTTCGGGTCTGTAAGCCCTTTTCTGGGGGAAGACAAAA  
GGACGGTACCCCAGGAAGAAGCCTCGGCTAACTACGTGCCAGCAGCCGCGGTAATACGTA  
GGAGGCGAGCGTTGTCCGGAATTACTGGGCGTAAAGAGCGTGTAGGCGGTTCGCCTACGTC  
GTGGATGAAAGCCCTCTGCTCAACGGGGGGAGTGTTTCGCGAAACGGGGTGACTCTGTGGA  
GTGTGGTAGGGGGGTGCGGAATGGCCGGTGGAGCGGTGAAATGCGTAGAGATCGGTCAGA  
ACACCAGTGGCGAAGGCGACACCCTGGGCCAGTACTGACGCTGAGACGCGAAAGCGTGGG  
GAGCGAACGGAATTAGAAACCCTTGTAGTCC

>Otu1534

CCAGCCTATGGGACGCAGCAGTTGGGAATTTTGGACAATGGGCGCAAGCCTGATCCAGCC  
ATGCCGCGTGCAGGATGAAAGCCTTCGGGTGTAACTGCTTTTGTACGGAACGAAAAGG  
TTCTTTCTAATAAAGAGAGCTCATGACGGTACCGTAAGAATAAGCACCGGCTAACTACGT  
GCCAGCAGCCGCGGTAATACGTAGGGTGCAAGCGTTAATCGGAATTACTGGGCGTAAAGC  
GTGCGCAGGCGGTGATGTAAGACAGTTGTGAAATCCCCGGGCTCAACCTGGGAACTGCAA  
TTGTGACTGCATTGCTGGAGTGCGGCAGAGGGGGATGGAATTCGCGGTGTAGCAGTGAAA  
TGCGTAGATATGCGGAGGAACACCGATGGCGAAGGCAATCCCCTGGGCCTGCACTGACGC  
TCATGCACGAAAGCGTGGGGAGCAAACAGGATTAGAAACCCCGGTAGTCC

>Otu1537

CAGCCTATGGGGTGCAGCAGTGAGGAATATTGCGCAATGGGGGAAACCCTGACGCAGCGA  
CGCCGCGTGGAGGATGAAGGCCTTCGGGTGTAACTCCTGTCTAGTAGGGAAGAGAACGG  
ACGGTACCTACTGAGGAAGCTTCGGCTAACTACGTGCCAGCAGCCGCGGTAAGACGTAGG  
GAGCAAGCGTTGTCCGGAATTACTGGGCGTAAAGAGCTCGCAGGCGGGAGCGTAAGTCTG  
GAAGGAAATCTCAAGGCTCAACTTTGGGGCTTTTTTCAGATACTGCGTTTCTTGAGGGTAT  
CAGAGGATAGTAGAATTCCCGGTGTAGCGGTGAAATGCGTAGATATCGGGAGGAATACCA  
GTGGCGAAGGCGACTGTCTGGGATATTCTGACGCTGAGGAGCGAAAGCGTGGGGAGCAA  
ACGGGATTAGAGACCCCGTAGTCC

>Otu1538

CCAGCCTATGGGGCGCAGCAGTAACGAATCTTCCGCAATGCACGAAAGTGTGACGGAGCG  
ACGCCGCGTGTGGGATGAAGTTCTTCGGAATGTAAACCACTGTCAGGGGTAAGAAAGTTC  
TGATCTACCCCAGAGGAAGGCACGGCTAACTCTGTGCCAGCAGCCGCGGTAAGACAGAGG  
TGCCAAGCGTTAGGCGGAATCACTGGGCTTAAAGCGTGTGTAGGCGGATCGTTAAGTGCT  
TTGTGAAATCCCATGGCTCAACCATGGAACCTGCTTGGCATACTGGCGATCTTGAGCCAGC  
TAGGGGCAACCGGAACAAATGGTGGAGCGGTGAAATGCGTAGATATCATTTGGAACGCCA  
ATGGTGAAAACAGGTTGCTGGGGCTGTGCTGACGCTGAGACACGAAAGCCAGGGGAGCAA  
ACGGGATTAGAAACCCGCGTAGTCC

>Otu1540

CCAGCCTACGGGTTGCAGCAGTGGGGAATCTTGCGCAATGGGCGAAAGCCTGACGCAGCG  
ACGCCGCGTGTGTGATGAAGGCCTTCGGGTGTAAAGCACTGTGGGGAGAGAAGAATAAG  
TGGTGGCTAATAGCCACCATGATGACGGTATCTCCTTAGCAAGCACCGGCTAACTCTGTG  
CCAGCAGCCGCGGTAAGACAGAGGGTGCAAACGTTGTTTCGGAATTACTGGGCGTAAAGCG  
TGTGTAGGCGGCTAGGTAAGTCGGATGTGAAAGCCCTGGGCTCAACCCAGGAAGTGCAC  
CGATACTGCTTAGCTAGAGTACCGGAGAGGTTGGTGGAATTCTCGGTGTAGAGGTGAAAT  
TCGTAGATATCGAGAGGAACACCGGTGGCGAAGGCGGCCAACTGGACGAGTACTGACGCT  
GAGACACGAAAGCGTGGGGAGCAAACAGGATTAGAAACCCGTGTAGTCC

>Otu1544

CCAGCCTATGGGTGGCAGCAGTGGGGAATATTGGACAATGGGGGGAACCCTGATCCAGCA  
ATGCCGCGTGTGTGAAGAAGGCCTGAGGGTTGTAAAGCACTTTCAGTGGGGAGGAGGGTT  
GATTGGTTAAGAGCTGATTGATTGGACGTTACCCACAGAAGAAGCACCGGCTAACTCCGT  
GCCAGCAGCCGCGGTAATACGGAGGGTGCAGCGTTAATCGGAATTACTGGGCGTAAAGG  
GTGCGTAGGTGGTTTAATAAGTTATCTGTGAAAGCCCTGGGCTTAACCTGGGAAGGCCAG  
ATAAGACTGTAAGACTAGAGTATGGGAGAGGGTAGTGGAATTTCCGGTGTAGCGGTGAAA  
TGCGTAGATATCGGAAGGAACACCGGTGGCGAAGGCGGCTACCTGGCCTGATACTGACAC  
TGAGGCACGAAAGCGTGGGGAGCAAACAGGATTAGAAACCCCGTAGTCC

>Otu1549

CCAGCCTACGGGGTGCAGCAGTGGGGAATATTGGGCAATGGGCGAAAGCCTGACCCAGCT  
ATGCCGCGTGAGTGATGAAGGCCTTCGGGTCGTAAAGCTCTGTGGAGAGGGAAGAACAAG  
CATGTGGCTAATATCCACGTGCCCTGACGGTACCTCCTTAGCAAGCACCGGCTAACTCCG  
TACCAGCAGCCGCGGTAATACGGAGGGTGCAAACGTTGCTCGGAATCATTGGGCGTAAAG  
CGCACGTAGGTGGTCTACTAAGTCGGGTGTGAAAGCCCTGGGCTCAACCCAGGAAGTGCA  
CTCGAAACTGATAGGCTTGAGTATGGAAGAGGGTTCGCGGAATTCCCGGTGTAGAGGTGAA  
ATTCTGTAGATATCGGGAGGAACACCAGTGGCGAAGGCGGCGACCTGGGCCAATACTGACA  
CTGAGGTGCGAAAGCGTGGGGAGCAAACAGGATTAGAAACCCTGGTAGTCC

>Otu1550

CCAGCCTATGGGGGCGAGCAGTCGAGGATCTTCGGCAATGGGCGCAAGCCTGACCGAGCG  
ACGCCGCGTGTGCGATGAAGGCCTTCGGGTGTAAAGCACTGTGAGGGGGAGAAAGGGC  
AACTTGATCGGCCCCCTGGAGGAAGCACGGGCTAAGTTCGTGCCAGCAGCCGCGGTAAGAC  
GAACCGTGCGAACGTTATACGGAATCACTGGGCTTAAAGGGCGCGTAGGCGGGCTGTCAA  
GTCAGAGGTGAAATCCTGCGGCTCAACCGTAGAAGAGCCCCGATACTGACGGTCTTGAG  
GGAGGTAGGGGCGTGTGGAACCTCCGGTGGAGCGGTGGAATGCGTAGATATCGGAAGGAA  
CGCCGGTGGCGAAAGCGACACGCTGGCCCTCTACTGACGCTGAGGCGCGAAAGCCAGGGG  
AGCAAACGGGATTAGATACCCCGTAGTCC

>Otu1553

CCAGCCTACGGGTGCGACCCAGTCGGGAAACTTTTGCAATACACGCAAGTGTGACAAAAGCA  
AGCCAAAGTGCCATTCTATATTTGAATAGCTTTTGTGGGATGCAAAAAGTCTCACGAATA  
AGGACTGGGCAAGACTGGTGCCAGCCGCCGCGGTAATCCCAGCAGTCCAAGTCGCAGCCA  
CATTTGTTGGGTCTAAAATATCCGTAGCTTGCCTTTCAAGTCTTTTGTGAAATCGGGACT  
CTTAAAGTTCCGGCGGGGCAAAAGATACTGTTAGGCTAGAGACCGGGAGGCGTAAGAAGTA  
CAGATAGGGTAACGGTAAAATGTGTTGATCCTATTTGGACTAACAGTCGCGAAGGCGTCT  
TACGAGAACGGTTCTGACAGTGAGGGATGAAGGCTAGGGGCGCAAAGTGGATTAGATACC  
CCAGTAGTCC

>Otu1554

CCAGCCTATGGGGTGCTGCAGTGGGGAATATTGGTCAATGGGCGAAAGCCTGAACCAGCA  
ATGCCGCGTGGGTGATGAAGGCCTTCGGGTGTAAAGCCCTGTCAGTGGGAAAGAAAAAG  
CCGGTTAACACCCGGACTTGACGGTACCCACAAAGGAAGCACCGGCTAACTCTGTGCCAG  
CAGCCGCGGTAATACAGAGGGTGCAAGCGTTGTTTCGGAATTACTGGGCGTAAAGCGCGTG  
TAGGCGGCTTTTAAAGTCGGACGTGAAATCCCTAGGCTTAACCTAGGAACTGCGTCCGAT  
ACTACTAAGCTCGAGTGTGCGAGGGGGTGGCGGAATTCCCGGTGTAGAGGTGAAATTCGT  
AGATATCGGGAGGAACACCTGTGGCGAAGGCGGCCACCTGGAAGACAACCTGACGCTGAGA  
CGCGAAAGCGTGGGGAGCAAACAGGATTAGAAACCCTCGTAGTCC

>Otu1555

CCAGCCTATGGGGTGCTGCAGTGGGGAATTTTGCAGCAATGGGCGAAAGCCTGACGCAGCA  
ACGCCGCGTGCGGGATGAAGGCCTTCGGGTGTAAACCGCTTTCAGCAGGGATGAAAATG  
ACAGTACCTGCAGAAGAAGCCCCGGCTAAATACGTGCCAGCAGCCGCGGTAATACGTATG  
GGGCAAGCGTTATCCGGATTCAATTGGGCGTAAAGAGCGCGTAGGCGGCTTGTTAAGTTAG  
GTGTGAAATCCGGGGGCTTAACCCGCGGCTTGCACCTAAACTGGCAGGCTTGAGTCTGG  
TAGAGGAAAGTGGAATTCACAGTGTAGCGGTGAAATGCGCAGATATTGGGAGGAACACCA  
GTGGCGAAGGCGGCTTCTGGGCCACGACTGACGCTGAGGCGCGAAAGCGTGGGGATCAA  
ACAGGATTAGATACCCTGGTAGTCC

>Otu1557

CCAGCCTACTGGTCGCAGCAGTCGAGGATCTTCGGCAATGGGCGCAAGCCTGACCGAGCG  
ACGCCGCGTGTGCGATGAAGGCCTTCGGGTGTAAAGCACTGTGAGGGGGAGGAAAAGCC  
GCAAGGTCTGACCTATCCCTGGAGGAAGCACGGGCTAAGTTCGTGCCAGCAGCCGCGGTA  
AGACGAACCGTGCGAACGTTGTTTCGGAATCACTGGGCTTAAAGGGCGCGTAGGCGGGGCC

GCAAGTCCGGGGTGAAATCCCCCAGCTCAACTGGGGAAGTGCCTTGGAAGTGCGGTTCT  
AGAGGGAGGTAGGGGCATGTGGAACCTCGGGTGGAGCGGTGAAATGCGTTGATATCCGAA  
GGAACGCCGGTGGCGAAAGCGACGTGCTGGATCTCTTCTGACGCTGAGGCGCGAAAGCCA  
GGGTAGCGAACAGGATTAGATACCCGCGTAGTCC

>Otu1558

CCAGCCTATGGGATGCAGCAGTGGGGAATATTGGACAATGGGCGAAAGCTTGATCCAGCA  
ATGCCGCGTGAGTGATGAAGGCCTTAGGGTTGTAAACTCTTTTCGACGGGGACGATAATG  
ACGGTACCCGTAGAAGAAGCTCCGGCTAACTTCGTGCCAGCAGCCGCGGTAATACGAAGG  
GGGCTAGCGTTGTTTCGGAATTACTGGGCGTAAAGCGCGCGCAGGCGGCTATCCAAGTCAG  
TGGTGAAAGCCCCGAGCTCAACTCCGGAAGTCCATTGAAACTGTTTAGCTTGAGGACGA  
GAGAGGTGAGTGGAATTTCCAGTGAGAGGTGAAATTCGTAGATATTGGGAAGAACACCA  
GTGGCGAAGGCGGCTCACTGGCTCGTTTTCTGACGCTCAGGCGCGATAGCGTGGGGATCAA  
ACAGGATTAGATACCCTGGTAGTCC

>Otu1559

CCAGCCTATGGGGGGCAGCAGTGGGGAATTTTGGACAATGGACGCAAGTCTGATCCAGCC  
ATGCCGCGTGAGTGAAGAAGGCCTTCGGGTGTAAAGCTCTTTTGTCCGGGAGCAAACT  
TAACGCCTAATACGTGTTGAGGCTGAGAGTACCGGAAGAATAAGCACCGGCTAACTACGT  
GCCAGCAGCCGCGTAATACGTAGGGTGCAGCGTTAATCGGAATTACTGGGCGTAAAGC  
GTGCGCAGGTGTTTATGTAAGCTTGATGTGAAATCCCCGGGCTTAACCTGGGAAGTGCAT  
TGAGGACTGCATGGCTAGAGTGTTGGCAGAGGGGGGTAGAATTCACGTGTAGCAGTGAAA  
TGCGTAGAGATGTGGAGGAATACCAATGGCGAAGGCAGCCCCCTGGGTAAACACTGACAC  
TCATGCACGAAAGCGTGGGGAGCAAACAGGATTAGATACCCCTGTAGTCC

>Otu1560

CCAGCCTATGGGTGGCACCAGTAACGAATATTCGCAATGCGCGAAAGCGTGACGGAGCG  
ATGCCGCGTGACAGGATGAAGCCCCCTCGGGGTGTAAACTGCTGTGAGGGTTTAGCAACACA  
ATGAGCATACCCAGAGGAAGAGACGGCTAACTCTGTGCCAGCAGCCGCGGTAATACAGAG  
GTCTCGAGCGTTAATCGGAGTCACTGGGCTTAAAGGGTGCGTAGGCGGGTCCGCAAGTGC  
TTTGTGAAATCCCATGGCTCAACCATGGAATTGCTTGGCAGACTGCGGATCTTGAGGTGCG  
GTAGAGGCTGCTGGAAGTCTAGGTGGAGCGGTGAAATGCGTAGATATCTAGAGGAACGCC  
GATGGTGAAGACAGGCAGCTGGGCCGATTCTGACGCTGAGGCACGAAAGCGTGGGGAGCG  
AACGGGATTAGATACCCCGGTAGTCC

>Otu1563

CCAGCCTACGGGAGGCTCCAGTTAGGAATCTTGCGCAATGGGCGAAAGCCTGACGCAGCC  
ATGCCGCGTGAAATGATGAAGGTCTTAGGATTGTAAATCTTTTCAGTGGGGACGATAATG  
ACGGTACCCATAGAAGAAGCCCCGGCTAACTTCGTGCCAGCAGCCGCGGTAATACGAGGG  
GGGCAAGCGTTGTTTCGATTATTTGGGCGTAAAGGGTGCGTAGGCGGTTTGATAAGTCTG  
ATGTGAAATCTATGGGCTCAACCCATAGTCTGCATTAGAACTGTGCGGCTTGAGTATGG  
GAGAGGTGAGTGGAATTTCCGGTGTAGCGGTGAAATGCGTAGATATCGGAAGGAACACCT  
GTGGCGAAAGCGGCTCACTGGACCATAACTGACGCTGATGCACGAAAGCTAGGGGAGCAA  
ACAGGATTAGAAACCCGGGTAGTCC

>Otu1566

CCAGCCTATGGGGGGCTCCAGTGGGGAATCTTCCGCAATGGACGAAAGTCTGACGGAGCA  
ACGCCGCGTGAGTGAAGAAGGTTTTTCGGATCGTAAAGCTCTGTTGTTTGAGACGAACGTG  
CAGTATACGAATAATGTGCTGTAATGACGGTATCAAACTAGAAAGCCACGGCTAACTACG  
TGCCAGCAGCCGCGGTAATACGTAGGTGGCAAGCGTTGTCCGGAATTATTGGGCGTAAAG  
GGAGCGCAGGTGGGAATGTAAGTCAGTCTTAAAGTGCGGGGCTCAACCCCGTGATGGGA  
CAGAACTACATTTCTTGAGTGCAGGAGAGGAAAGTGGAATTCCTAGTGTAGCGGTGAAA  
TGCGTAGATATTAGGAGGAACACCAAGTGGCGAAGGCGACTTTCTGGACTGTAACCTGACAC  
TGAGGCTCGAAAGCTAGGGGAGCGAACGGGATTAGAAACCCTAGTAGTCC

>Otu1572

CCAGCCTACGGGGGGCACCAGAAGTGGGCATGGGGGCATTATAAAAGACGGAGCCAAAAT  
GGTAAACGCCATGGCAAATAGTGTGGTGCCTAAGTTCACCGTTATTATGGGCAACTCCTT  
TGGTGCGGCCAATTACGCTATGTGTGGCAAAGCCTACGACCCCGTTTAAATTGTGGGTTG  
GCCTACCGCGCAAATTGCTGTAATGGGTGGTGCACAAGCCGCCAAAGTATTGGTGCAAAT  
AGAAGTAGCTTCTTTAAAGCTAAAGGAGAAGTTATTACTCCCGAAAATGAAGCCGAGTT  
ATACAACAAAACCAAAGACCGCTACGATACACAACTACGCCCTATTACGCTGCATCTCG  
TTTGTGGTTAGATGCCATTATAGACCCATTAGAAACCCCTTGTAGTCC

>Otu1575

CCAGCCTATGGGGGGCAGCAGGCGCGAAACCTCTGCAATGCGCGAAAGCGTGACAGGGGA  
ATTCTGAGTGCTACACTACGCGTGTAGCTTTTCGCAATTTTAAGACAATTGCGGAATAAG  
GGCTGGGCAAGACTAGTGCCAGCCGCCGCGGTAACACTAGCGGCCCCGAGTGGTGTCCACG  
AATATTGGGTCTAAAGAGTCCGTAGCTGGTCCGTTAAGTTTCCTGTGAAATTTTCAGGGCT  
CAACTCTGAAGCGTGCAGGAAATACTGGCGAGACTTGAGAGCGGGGGAGGTCTAGAGTAC  
TCATGGGGTAACGGTAAATGTTGTAATCCTATGAGGACTTCCAGTGGCGAAGGCGCTAG  
ACCAAACGCGTCTGACAGTGAGGGACGAAGGCTAGGAGAACGAATCGGATTAGATACCC  
GTGTAGTCC

>Otu1576

CCAGCCTACGGGGCGCAGCAGTAGGGAATATTGGGCAATGGGGGCAACCCTGACCCAGCC  
ATGCCGCGTGCAGGAGAAAGGCCCTCTGGGTGTAACTGCTTTTGGGAGGGGACAAAAG  
GCCCATGCGTGGGAGATTGAGTGTACCTCCAGAATAAGCACCGGCTAACTCCGTGCCAGC  
AGCCGCGGTAATACGGAGGGTGCAGAGCGTTGTCCGGATTTATTGGGTTTAAAGGGTGCCT  
AGGCGGCCGCTTAAGTCGGGGGTGAAACCCACGGGCTCAACCCGTGGAGTGCCCCCGATA  
CTGTGCGGCTTGGGTCTCTCTGGGCGGGCGGAATGGAAGGTGTAGCGGTGAAATGCATA  
GATATCTACCAGAACGCCGATAGCGAAGGCAGCTCGCTGGGGACGTACCGACGCTGAGGC  
ACGATAGCGTGGGGATCAAACAGGATTAGATACCCCGGTAGTCC

>Otu1577

CCAGCCTACGGGTGGCACCAGCAACGAATATTGGACAATGGACGCAAGTCTGATCCAGCG  
ACGCCGCGTGCAGGGATGAAGCCCTTCGGGGTGTAACCGCTGTCAGGGGTAATCAATAAA  
TTGAGATATCCCAGAGGAAGCCACGGCTAACTCCGTGCCAGCAGCCGCGGTAAGACGGAG  
GTGGCGAGCGTTACTCGGATTTACTGGGCTTAGAGCGGGTGCAGGCGGCCATACAAGTCC  
GGAGTGAATCCCCCGGCTCAACCGGGGAACCTGCTTTGGTACTGTATGGCTTGAGGCAA  
GCAGGGGTGAGTGAACGTTTGGTGTAGCGGTGAAATGCGTAGATATCAAACGGAACGCC  
GGTGGTGAAGACGGCTGACTGGGCTTGTCTGACGCTCAGACCCGAAAGCGTGGGGAGTG  
AACCGGATTAGATACCCCGGTAGTCC

>Otu1578

CCAGCCTATGGGATGCTCCAGTCGAGAATCTTTTGCAATGGGCGAAAGCCTGACAAAGCG  
ACGCCGTGTGAATGAAGAAGGCCTTCGGGTGTAAAGTTCTTTTGCCAACGAGCAAGAAA  
GAGTAGTGAATAACTGCTCAATTTGAGAGTAGTTGGAGAATAAGCACCCGGCAAACCTCCGT  
GCCAGCAGCCGCGGTAATACGGAGGGTGCAAGCATTAAATCGGAATAATTGGGCGTAAAGG  
GCGCGTAGGTGGATTAGTAAGTCATTTGTGAAATTCGGGAGCTTAACCTCCGAGCTGCAA  
GTGAAACTCCTAGTCTAGAGGTTGGTTCGGAGGAAACGGAATTCACGCTGTAGCGGTGAAA  
TGCGTAGATATGTGGAAGAACACCGGTGGCGAAAGCGGTTTCCTAGATTACACCTGACAC  
TGATGCGCGAGAGCGTGGGGAGCAAACAGGATTAGATACCCGCGTAGTCC

>Otu1579

CCAGCCTACGGGGGGCTCCAGTCGGGAAAATTTCTGCAATGTACGAAAGTATGACAGAGCA  
AGCCAAAGTGCTTTTCTTTTAGAAAAGCTTTTGTGTGCTGTAAAAAGGCACACGAATAAG  
GACCGGGAGAGACTGGTGCCAGCCGCCGCGGTAATCCAGCGGTCCAAGTCGCAGCCACA  
TTTGTGGGTCTAAAACATCCGTAGCTTGCCTTACAAGTCTTTTGTGAAATCGGGACTCT  
TAAGGTTCCGTGCGGCAAAAGATACTGTTTGGCTAGAGACCGGGAGATGTAAAGAGTACA  
GATAGGGTAGTGGTTGAATACGTTGATCCTTTCTGGATTAACGATAGCGAAGGCACCTTTA  
CAAGCACGGATCTGACAGTGAGGGATGAAGGCTAGGGGCGCAAAGTGGAATTAGAAACCC  
AGTAGTCC

>Otu1581

CCAGCCTATGGGAGGCTGCAGTGGGGAATCTTGCAATGGGCGAAAGCCTGATGCAGCA  
ACGCCGCGTGGGTGAAGAAGGTTTTTCGGATTGTAAAGCCCTTTTCGGCTGGGAAGAAGGT  
GTTACGGTAAATAATCGTAGCATTTGACGGTACCAGAAGAAGAAGCACCGGCTAATTTTCG  
TGCCAGCAGCCGCGGTAATACGAAAGGTGCAAGCGTTGTTTCGGAATGACTGGGCGTAAAG  
CGCACGTAGGCGGGTCTGTAAGTCAGATGTGAAATCCCCGGGCTCAACCCGGGAACAGCA  
CCTGAAACTGCGGATCTTGAATGCTTGAGAGGTTGGTGGAAATTCAGGTGTAGGAGTGAA  
ATCCGTAGATATCTGGAGGAACACCGGAGGCGAAGGCGGCCAACTGGCGATGCATTGACG  
CTGAGGTGCGAAAGCGTGGGGAGCAAACAGGATTAGAGACCCGTGTAGTCC

>Otu1583

CCAGCCTACGGGAGGCAGCAGTGAGGAATATTGGGCAATGGACGAAAGTCTGACCCAGCA  
ACGCCGCGTGGAGGATGAAGGCCGTAAGGTGTAAGTCTTTTTCGAGAGGGACGAATATT  
TATATTTTCGTAAGGGATATAAACTGACGGTACCTTTTAGAAGAAGCCCCGGCTAACTACGT  
GCCAGCAGCCGCGGTAATACGTAGGGGGCAAGCGTTGTCCGGATTTACTGGGTGTAAAGG



GCGCGTAGGCGGGTTTTGTAAGTCAGTGGTGAAAGCCTGCAGCTTAACTGCAGAACTGCCA  
TTGATACTGCAAATCTTGAGTTTCAAGAGAGAAGCGGAATTCAGGTGTAGTGGTGAAA  
TACGTAGATATCTGGAAGAACACCACTGGCGAAGGCGGCTTCTTGGTCTGTAAGTACGCG  
TGAGGCGCGAAAGCGTGGGGATCAAACAGGATTAGAAACCCCCGTAGTCC

>Otu1586

CCAGCCTATGGGTTGCTGCAGTGGGGAATCTTGGACAATGGGCGCAAGCCTGATCCAGCC  
ATGCCGCGTGAGTGACGAAGGCCTTAGGGTTGTAAAGCTCTTTTACCAGGGACGATAATG  
ACGGTACCTGGAGAATAAGTCCCGGCTAACTTCGTGCCAGCAGCCGCGGTAATACGAAGG  
GGACTAGCGTTGTTTCGAATTACTGGGCGTAAAGCGCACGTAGGCGGGATGGCCAGTCAG  
AGGTGAAATCCCAGAGCTCAACTCTGGAACCGCCTTTGATACAGCCATTCTTGAGTCCGA  
TAGAGGTGAGTGGAATTCCTAGTGTAGAGGTGAAATTCGTAGATATTAGGAAGAACACCA  
GTGGCGAAGGCGGCTCACTGGATCGGTACTGACGCTGAGGTGCGAAAGCGTGGGGAGCAA  
ACAGGATTAGAAACCCTTGTAAGTCC

>Otu1589

CCAGCCTACGGGACGCACCACTTTTCAATCATTACACAATGGGCGAAAGCCTGATGGTGCG  
ACGCCGCGTGAGGGATGAAGGTCTTCGGATTGTAAACCTCTGTCACTGGGGAAGAAACGC  
TTCAGGTTAATAGCCTGAAGCCTGACTTAACCCGGAGAGGAAGCAGTGGCTAACTCTGTG  
CCAGCAGCCGCGGTAATACAGAGACTGCAAGCGTTATTTCGGATTCACTGGGCGTAAAGGG  
TGCGCAGGTGGCCAAGTGTGTGAGGCGTGAAAGCCCGGAGCTCAACTCCGGAATTGCACC  
TCAAACCTACATGGCTAGAGCATTTGGAGAGGGGAGCAGAATTCACGGTGTAGCAGTGAAAT  
GCGTAGATATCGTGAGGAAGACCAGTGGCGAAGGCGGGTCTCTGGACAGTTCCTGACGCT  
GAGGCGCGAAGGCCAGGGGAGCAAACGGGATTAGAGACCCTGGTAGTCCCC

>Otu1590

CCAGCCTACGGGTTGCAGCAGTGAGGAATATTGGACAATGGGCGCAAGCCTGATCCAGCC  
ATGCCGCGTGACAGGAAGACGGTCCTATGGATTGTAAACTGCTTTTATACAGGAAGAAACA  
CTCCCTCGTGAGGGAACCTTGACGGTACTGTAAGAATAAGGATCGGCTAACTCCGTGCCAG  
CAGCCGCGGTAATACGGAGGATCTAAGCGTTATCCGGAATCATTGGGTTTAAAGGGTCCG  
TAGGCGGTTTTGATAAGTCAGTGGTGAAAGCCCATCGCTCAACGATGGAACGGCCATTGAT  
ACTGTCAGACTTGAATTACTAGGAAGTAACTAGAATATGTAGTGTAGCGGTGAAATGCTT  
AGATATTACATGGAATACCAATTGCGAAGGCAGGTTACTACTAGTGGATTGACGCTGATG  
GACGAAAGCGTGGGGAGCGAACAGGATTAGAGACCCGTGTAGTCC

>Otu1591

CCAGCCTACGGGGGGGCTCCAGTGGGGAATCTTGCGCAATGGACGAAAGTCTGACGCAGCC  
ACGCCGCGTGAGTGATGAAGGCCTTCGGGTTGTAAAGCTCTGTGCCCCGGGACGAACGGC  
CGTAAGGTTAACAGCCTTATGGATTGACGGTACCGGGAGAGGAAGCACCGGCTAACTCTG  
TGCCAGCAGCCGCGGTAATACAGAGGGTGCAAGCGTTGCTCGGAATTATTGGGCGTAAAG  
GGCAGGTAGGTGGTCTTATTTGTCTAGGGTGAAATCCCTGAGCTTAACTCAGGAAGTGCC  
CTAGAAACGGTAAGACTGGAGTACTGGAGAGGGTCTGTGGAATTCCCGGTGTAGCGGTGAA  
ATGCGTAGAGATCGGGAGGAACACCAGAGGCGAAGGCGGCGACCTGGACAGTGAAGTACA  
CTCAACTGCGAAAGCGTGGGGAGCAAACAGGATTAGAAACCCTAGTAGTCC

>Otu1592

CCAGCCTACGGGTCGCTGCAGTAGGGAATTTTCCACAATGGGCGAAAGCCTGATGGAGCA  
ACGCCGCGTGACAGGATGAAGGCCTTCGGGTTGTAAACTGCTTTTATCTGTGAAGATTATG  
ACGGTAGCAGATGAATAAGGATCGGCTAACTCCGTGCCAGCAGCCGCGGTACATACGGAGG  
ATCCAAGCGTTATCCGGAATTACTGGGCGTAAAGAGTTGCGTAGGTGGCATTGTAAGTTG  
CTAGTGAAAGCATACGGCTCAACCGTATATACATTAGCAAACTGCAAAGCTTGAGGACG  
AGAGAGGTACCTGGAATTCCTAGTGTAGGAGTGAAATCCGTAGATATTAGGAGGAACACC  
GATGGCGTAGGCAGGGTACTGGCTTGTTCCTGACACTAAGGCACGAAAGCCAGGGGAGCA  
AACGGGATTAGAAACCCGCGTAGTCC

>Otu1593

CCAGCCTATGGGTGGCTGCAGTGGGGAATCTTGGACAATGGGGGAAACCCTGATCCAGCC  
ATGCCGCGTGAGTGATGAAGGCCTTCGGGTTGTAAACTCTTTTCGACGGGGACGATAATG  
ACAGTACCCGTAGAAGAAGCTCCGGCTAACTTCGTGCCAGCAGCCGCGGTAATACGAGGG  
GGGCAAGCGTCGTTTCGAATTATTGGGCGTAAAGGGTGCGTAGGCGGTTTGGAAGTCTT  
GTGTGAAATCTCCGGGCTCAACTCGGAGTCTGCACGGGAACTGCCGGGCTTGAGTGTGG  
GAGAGGTGAGTGGAATTTCCGGTGTAGCGGTGAAATGCGTAGATATCGGAAGGAACACCT  
GTGGCGAAAGCGGCTCACTGGACCACAACCTGACGCTGATGCACGAAAGCTAGGGGAGCAA  
ACAGGATTAGATACCCTCGTAGTCC

>Otu1594

CAGCCTATGGGTGGCAGCAGTGGGGAATATTGGACAATGGGCGCAAGCCTGATCCAGCCA  
CGCCGCGTGAGTGATGAAGGCCTTCGGGTCGTAAAGCTCTGTGGGGAGGGACGAACCGCT  
GGATGTGCATAGCTTCCAGCATGACGGTACCTCCTTAGCAAGCACCGGCTAACTTCGTGC  
CAGCAGCCGCGGTAATACGAAGGGTGCAAACGTTGCTCGGAATTATTGGGCGTAAAGCGC  
ACGTAGGCGGCGCTCTAAGTCGGATGTGAAAGCCTTTGGCTCAACCAAAGAAGTGCATTC  
GAAACTGGAGCGCTTGAGTACTTAAGAGGATCGCGGAATTCCCGGTGTAGAGGTGAAATT  
CGTAGATATCGGGAGGAACACCAGTGGCGAAGGCGGCGATCTGGAAAGATACCGACGCTG  
AGGTGCGAAAGCGTGGGGAGCAAACAGGATTAGAAACCCTAGTAGTCC

>Otu1596

CCAGCCTATGGGAGGCTCCAGTCGAGAATCTTCCACAATGGACGAAAGTCTGATGGAGCG  
ACGCCGCGTGATTGATGAAGTCCTTCGGGACGTAAAGATCTTTTATGAGGGAAGAAGTTT  
ATTGACGGTACCTCATGAATAAGGGGCTCCCAATCTCGTGCCAGCAGGAGCGGTAATACG  
AGAGCCTCAAGCGTTATCCGGAATTACTGGGCGTAAAGGGTGCCTAGGTGGTAGTGCTAG  
TCGTGTGTTAAATCCCGGGGCTCAACCTCGGAATCGCATGCGAAACGGCACAACCTTAGAG  
AGGAGGAGAGGTGTGCGGAATCATGGTGTAGGGGTGAAATCCGTTGATATCATGGGGAA  
CACCAAAGCGAAAGCAGCACACTGGCCTTTTTCTGACACTGAGGCACGAAAGCGTGGGT  
AGCGAATGGGATTAGAACCCTGGTAGTCC

>Otu1599

CCAGCCTACGGGTTCACACAGTCGAGGATTTTTCTCAATGGGGGAAACCCTGAAGGAGCG  
ACGCCGCGTGAGGGATGAAGGTCTTCGGATTGTAAACCTCTGTCATCTGGGAACAATGCG  
CTCCACCTAATACGTGGATCGTTGATAGTACCGGAAGAGGAAGCAGTGGCTAACTCTGTG  
CCAGCAGCCGCGGTAATACAGAGACTGCAAGCGTTGTTTCGGATTTCATTGGGCGTAAAGGG  
TGCGCAGGCGGTGTGCTAAGTTGGATGTGAAATCTCACAGCCTAACTGTGATAGGTCAAT  
CAAACTGGCATGCTAGAGGACTGGAGAGGAGACTGGAATAGTCGGTGTAGCGGTGAAAT  
GCGTAGAGATCGACTAGAACACCGGTGGCGAAGGCGGGTCTCTGGACAGTTCTTGACGCT  
CAGGCACGAAAGCCAGGGGAGCAAACGGGATTAGAAACCCTTGTAGTCC

>Otu1602

CCAGCCTATGGGGGGCAGCAGTGAGGAATCTTGCGCAATGGGGGAAACCCTGACGCAGCA  
ACGCCGCGTGAGTGAGGAAGGCTTTCGGGTCGTAAAGCTCTGTCAGATGGGAAGAAATGG  
GTGAAGATCAATACCCTTCATTCTTGACGGTACCATCAGAGGAAGCACCGGCTAACTCCG  
TGCCAGCAGCCGCGGTAATACGGGGGGTGCAAGCGTTGTTTCGGAATCATTTGGGCGTAAAG  
CGCGCGCAGGCGGCTTGGAAGTCAGATGTGAAAGCCCTGGGCTTAACCCAGGAAGTGCA  
TTTGATACTGCCTCGCTAGAGTACGGGAGAGGAAAGTGAATTCCTGGTGTAGAGGTGAA  
ATTCGTAGATATCAGGAGGAACACCGGTGGCGAAGGCGACTTTCTGGCCCCGATACTGACG  
CTCAGGCGCGAAAGCGTGGGGAGCAAACAGGATTAGATACCCCCGTAGTCC

>Otu1604

CCAGCCTACGGGTCGCGAGCAGTGGGGAATATTGGACAATGGGGGCAACCCTGATCCAGCG  
ATGCCGCGTGGGTGAAGAAGGCCTTCGGGTGTAAAGCCCTTTAGGATGGGAAGAAGCTG  
CGTAGGTGAATAGCCTATGTAGTTGACGGTACCGTCAGAATAGGCACCGGCAAACCTCTGT  
GCCAGCAGCCGCGGTAATACAGAGGGTGCGAGCGTTAATCGGATTAACTGGGCGTAAAGG  
GCGCGTAGGCGGTTGTATTAGTGTGATGTGAAAGCCCTGGGCTTAACCTAGGAAGAGCAT  
CGCAAACGGTGCAACTTGAGTATAAGAGAGGGTGGCGGAATTTCCGGTGTAGCGGTGAAA  
TGCGTAGAGATCGGAAGGAACGTCAATGGCGAAGGCAGCCACCTGGCTTAATACTGACGC  
TGAGGCGCGAAAGCGTGGGTAGCGAACAGGATTAGAGACCCGCGTAGTCC

>Otu1605

CCAGCCTACGGGGCGCTCCAGCAAGGAATATTGGGCAATGGGCGAAAGCCTGACCCAGCG  
ACACCGCGTGGGGGAAGAAGACCTTCGGGTGTAAACTCCTTTTATTGGGGAAGAATAAT  
GACGGTACCCGATGAATAAGCCCCGGCTAACTACGTGCCAGCAGCCGCGGTAATACGTAG  
GGGCGAGCGTTATCCGGATTACTGGGCGTAAAGCGGGTGCAGGCGGCCCTGTCAAGTCG  
GATGTGAAATCTCCCGGCCCAACCGGGAGGGTGCATTCGAAACTGATGGGCTAGAGTGCA  
GCAGAGGGAGATGGAATTCCCGGTGTAGTGGTGAATGCGTAGATATCGGGAAGAACT  
AGTGGCGAAGGCGGTCTCCTGGGCTGTAACCTGACGCTGGGGCCCCGAAGGCGTGGGGAGCA  
AACAGGATTAGATACCCTTGTAGTCC

>Otu1606

CCAGCCTATGGGTGGCAGCAGTAGGGAATATTGGGCAATGGAGGCAACTCTGACCCAGCC  
ATGCCGCGTGCGAGGAAGAAGGCCCTTCGGGTGTAAACTGCTTTTGAACGGGAAGAAAAG  
TCCATGCGTGGGCCTATGACGGTACCGTTAGAATAAGCCACGGCTAACTACGTGCCAGCA

GCCGCGGTAATACGTAGGTGGCAAGCGTTGTCCGGATTTATTGGGTTTAAAGGGTGCGTA  
GGCGGCCCTGTAAGTCAGTGGTGAAATACCGCAGCTCAACTGTGGGGGTGCCATTGATAC  
TGCAGGGCTTGAGTGGAGTCGGGGTGGCCGGAATTTACGGTGTAGCGGTGAAATGCATAG  
ATACCGTAAAGAACACCGATAGCGAAGGCAGGCCACTGGGCTCCAAGTACGCTGAGGCA  
CGAAAGCGTGGGGATCAAACAGGATTAGATACCCTAGTAGTCC

>Otu1608

CCAGCCTACGGGTCGCACCAGCTAAGAATCTTCCGCAATGGACGAAAGTCTGACGGAGCG  
ACGTCGCGTGGGTGATGAAGGCGGAAACGTTGTAAAGCCCTTTTATAGACGAGGAATAAG  
CCTGGGAGGGAATGCCTGGGTGATGACGGTAGTCTGTGAATAAGCCCCGGCTAATTACGT  
GCCAGCAGCCGCGGTAACACGTATGGGGCGAGCGTTGTTTCGGAATTATTGGGCGTAAAGG  
GTATGCAGGCGGTTTTGTAAAGTCTGGTGTGCAAGACCACAGCTTAACTGTGGGAACGCGC  
TGGAAGTGTGAGACTAGAGTACAGGAAGGGGAGTTGGAATTCAGGTGTAGGGGTGAAA  
TCTGTAGATATCTGGAAGAACATCAGTGGCGAAGGCGAACTCCTGGCCATGTACTGACGC  
TGAGATACGAAAGCGTGGGGAGCAAACAGGATTAGATACCCGCGTAGTCC

>Otu1609

CCAGCCTACGGGGGGCAGCAGTCTAGAGGCTTCGGCAATGGACGAAAGTCTGACCGAGCG  
ACGCCGCGTGC GG GATTGAAGGTCGTGAGATTGTAAACCGCTGTCGGCGGGGAAGAATGC  
CCGGATGGTGAATCCGGGAGAGACGGTACCCGCAGAGGAAGCCCCGGCTAACTCCGTGCC  
AGCAGCCGCGGTAATACGGAGGGGGCAAACGTTGTTTCGATTACTGGGCGTAAAGGGTG  
CGTAGGCGGTTTCGGTTAGTCTGGTGTGAAAATTCGTGCTTAACGACGAAAACGCATCGG  
AACTGCCGAGCTCGAGGGTGGAAGAGGCAGGTGGAATTCCTGGTGTAGCGGTGGAGTGC  
GTAGAGATCGGGGAGAACACTCGTGGCGAAGGCGGCCTGCTGGTCCATTTCTGACGCTGA  
GGCACGAAAGCCAGGGGAGCAAACGGGATTAGATACCCGTGTAGTCC

>Otu1612

CCAGCCTATGGGACGCACCAGTGGGGAATATTGGACAATGGGCGAAAGCCTGATCCAGCC  
ATGCCGCGTGGGTGAAGAAGGCCTTAGGGTTGTAAACCCCTTTCAGCGGGGAAGATAATG  
ACGGTACCCGCAGAAGAAGTCCCGGCTAACTCCGTGCCAGCAGCCGCGGTAATACGGAGG  
GGACTAGCGTTGTTTCGGAATTACTGGGCGTAAAGCGCACGTAGGCGGATTTGTAAAGTCAG  
GGTGAAATCCCGGGGCTCAACCTCGGAACTGCCTTTGATACTGCAAACTCTCGAGTCCGG  
AAGAGGTGAGTGGAATTCCTAGTGTAGAGGTGAAATTCGTAGATATTAGGAAGAACACCA  
GTGGCGAAGGCGGCTCACTGGTCCGGTACTGACGCTGAGGTGCGAAAGCGTGGGGAGCAA  
ACAGGATTAGAAACCCTCGTAGTCC

>Otu1613

CAGCCTACGGGGCGCAGCAGTGGGGAATTTTGGACAATGGGGGCAACCCTGATCCAGCGA  
CGCCGCGTGAAGGATGAAGGTCTTCGGATTGTAAACTTCTTTTAGAGGGGATGAATGCCG  
CCGTGAATAACGGTGGGTGACAGTACTCTTTGAATAAGCCACGGCTAACTACGTGCCAGC  
AGCCGCGGTAATACGTAGGTGGCAAGCGATACTCGGAATCACTAGGCGTAAAGCGCAGGT  
AGGCGGTATGGTAAGTCTTTTGTGAAAGCTCCCGGCTTAACTGGGAGAGGTCAAGGGAAA  
CTACCGGACTAGAGTGTGGTAGGGGATACTGGAATTCCTGGTGTAGCGGTGAAATGCGTA  
GATATCAGGAGGAATACCTATGGCGAAAGCAGGTATCTGGGCCATCACTGACGCTGAGCT  
GCGAAAGCTAGGGGAGCAAACAGGATTAGATACCCTCGTAGTCC

>Otu1614

CCAGCCTACGGGTGGCACCAGTGGGGAATATTGGGCAATGGGCGCAAGCCTGACCCAGCC  
ATGCCGCGTGAGTGATGAAGGCCTTCGGGTCGTAAAGCTCTGTGGGGAGGGAAGAAACCT  
CTCGTAGCTAATATCTACGGGATTTGACGGTACCTCCTTAGCAAGCACCGGCTAACTCCG  
TGCCAGCAGCCGCGGTAATACGGAGGGTGCAAACGTTGCTCGGAATCATTTGGGCGTAAAG  
CGCACGTAGGCGGCCTAATAAGTCGGATGTGAAAGCCCTGGGCTCAACCCAGGAAGTGCA  
TTCGAAACTGCTAGGCTTGAATATGGAAGAGGGTCGCGGAATTCCCGGTGTAGAGGTGAA  
ATTCGTAGATATCGGGAGGAACACCAGTGGCGAAGGCGGCGACCTGGGCCAATATTGACG  
CTGAGGTGCGAAAGCGTGGGGAGCAAACAGGATTAGAGACCCTAGTAGTCC

>Otu1620

CCAGCCTATGGGACGCAGCAGGCGCGAAATTTCCGCAATGCGCGAAAGCGTGACGGGGGT  
AATCCGAGTGATAGTCTAACGACTATCTTTTGGCCAGTCTGAATAACTGGCAGAATAAGT  
GGTGGGTAAATCCTGTGCCAGCCGCCGCGGTAATACAGGTAGCACAAAGTGGTGTCCATGA  
ATATTGAGTCTAAAGCGCCCGTAGCTGGCCTTGCCAGTCTTCTGTGAAATCTCGCGGCCCT  
AACCGCGAGGCGTGACAGAAGATACTACAAGGCTTGGGAGTGGGGGAGGTCAGAGGTACTA  
TAGGGGGAAGAGTAAATCCTGTAATCCTTGTAGGACCCCTCGGTGGCGAAGGCGTCTGAC  
CAAAACACATCCGACAGTGAGGGACGAAGGCTAGGGGAGCGAACCGAATTAGATACCCTA

GTAGTCC

>Otu1621

CCAGCCTACGGGTCGCTGCAGTAGGGAATTTTCCACAATGGGCGAAAGCCTGATGGAGCA  
ACGCCGCGTGCAGGATGAATGCCTTCGGGTGTAAACTGCTTTTATATGTGACGATTATG  
ACAGTAGCATATGAATAAGGATCGGCTAACTCCGTGCCAGCAGCCGCGGTCATACGGAGG  
ATCCAAGCGTTATCCGGAATTACTGGGCGTAAAGAGTTGCGTAGGTGGCAGAGTAAGTTA  
GTAGTGAAAGCGTTTCGGCTCAACCGAATATCCATTACTAAAACCTGCTCAGCTAGAGGACG  
AGAGAGGTTATTGGAATTCCTAGTGTAGGAGTGAAATCCGTAGATATTAGGAGGAACACC  
GATGGCGTAGGCAGATAACTGGCTCGTTCCTGACACTAAGGCACGAAAGCGTGGGTAGCA  
AACGGGATTAGAAACCCGGGTAGTCC

>Otu1622

CCAGCCTACGGGAGGCTCCAGTAAGGAATATTGGTCAATGGGCGGAAGCCTGAACCAGCC  
ATGCCGCGTGCAGGAAGACGGCCCTACGGGTGTAAACTGCTTTTATACCGGAATAAACCC  
TCGTTATGTATAACGAGCTGAATGTACGGTAAGAATAAGGATCGGCTAACTCCGTGCCAG  
CAGCCGCGGTAATACGAGGATCCAAGCGTTATCCGGATTTATTGGGTTTAAAGGGTGCG  
TAGGTGGCCTGTTAAGTCAGGGGTGAAAGACGGTAGCTCAACTATCGCAGTGCCCTTGAT  
ACTGACGGGCTTGAATGAACTAGAGGTAGGCGGAATGTGACAAGTAGCGGTGAAATGCAT  
AGATATGTCACAGAACACCAATTGCGAAGGCAGCTTACTATGGTTTGATTGACACTGAGG  
CACGAAAGCGTGGGGATCAAACAGGATTAGAAACCCTAGTAGTCC

>Otu1623

CCAGCCTACGGGGTGCTGCAGTAGGGAATATTGCGCAATGGACGAAAGTCTGACGCAGCG  
ACGCCGCGTGGGCGACGAAGGCCCTTCGGGTGTAAGCCCTTTTAGCAGGGACGAGTGAG  
GACGGTACCTGCTGAATAAGTCTCGGCTAACTACGTGCCAGCAGCCGCGGTAACACGTAG  
GAGGCGAGCGTTATCCGGATTCACTGGGCGTAAAGCGCGCGTAGGCTGTTGAGTAAGTCG  
GACGTGAAAGCCCCCTGGCTCAACTGGGGGAGGCCGTTGATACTGCTCGGCTTGAGGGTG  
AGAGGGGAAAGTGGAATTCCTGGTGTAGCGGTGGAATGCGTAGAGATCGGGAGGAACACC  
AGTGGCGAAGGCGGTTTTCTGGCTCACCCCTGACGCTGATAGCGCGAAAGCGTGGGGAGC  
AAACGGGATTAGATACCCGCGTAGTCC

>Otu1624

CCAGCCTACGGGACGCACCAGCAGGGGTTTTTCTTTTTTGTCTGAAACCAACCCGAAAAAG  
AGGCTGGATGACCGACGAAGCCACATTTCGACGCAATAAGGATAAATCCTGCCATGGTATA  
CGAAAGGTCGAGTTTATCCTTGAGAAATGGCAATGCCGCTGTAAGCGCGCCCTGGTAGAT  
ATCAGTCATACAATGACCCAGGGAGAGTAGCATAAGAACTTTCAAATTGAATTTTTTTTAT  
ATCTGTTTTCTTGTTATTACGCTTCTCATTCCTCTCCGGTAGTTTTGCCAATGCCCTCA  
AGCCATAGACCGTACCCATATGCACGACCACACCCAGGTAGGCGCCCGCGATGATGTGCG  
TTAAAAAGTGATAATCCATCATAATCAAAGCCAGTGCTACTGCCATTAGATACCCCTGTA  
GTCC

>Otu1626

CCAGCCTACGGGTTGCAGCAGTGAGGAATATTACTCAATGGACGAAAGTCTGAAGCAGCA  
ACGCCGCGTGAGGGATGAAGGTGCTCTGCATCGTAAACCTCTGTAGAGGGAGACAAACTT  
CGAGTTACTACTCGATTGATGGTACCCCTAAAGTAAGGATCGGCTAACTACGTGCCAGCA  
GCCGCGGTAATACGTAGGATCCAAGCGTTGTCCGGATTTACTGGGTGTAAAGGGTGCGCA  
GGCGGACCAATAAGTCAGGAGTGAAATCTCGGCGCTCAACGCCGAAACGTCTTTTGATAC  
TGTTGGTCTTGAATAAGCGAGAGATTTCGTGGAATTCAGAGTGATGCAGTGAAATGTGTAG  
ATATTTCGAAGAACACCAGAGGCGAAGGCAGCGAATTGGCGCTTTATTGACGCTCAGGCA  
CGAAAGCATGGGGATCAAACAGGATTAGAGACCCTCGTAGTCC

>Otu1631

CAGCCTACGGGAGGCAGCAGTAGGGAATATTGCACAATGGGCGAAAGCCTGATGCAGCGA  
CGCCGCGTGAGGGATGAAGGGCTTCGGCTCGTAAACCTCTGTCAGGTGGGACGATGGGAC  
ATATGGCTAACATCCATGTGTTTTGACGGTACCGCCGGAGGAAGCACCGGCTAACTACGT  
GCCAGCAGGCGCGGTAATACGTAGGGTGCAAGCGTTGCTCGGAATCACTGGGCGTAAAGC  
GTGAGTAGGTGGACTTTTGGTAAGTCAGATGTGAAAGCCTTGGGCCTAACCCAAGAAGTG  
CATTTGATACTGCCAGTCTAGAGTTCGGGAGAGGGAAGCAGAATTCCAGGTGTAGGGGTG  
AAATCCGTAGATATCTGGAGGAATACCAGTGGCGCAAGCGGCTTCCTGGACCGATACTGA  
CACTGAGTCACGAAAGCGTGGGGATCAAACAGGATTAGAAACCCCTGTAGTCC

>Otu1634

CCAGCCTACGGGACGCTGCAGTGGGGAATATTGGGCAATGGACGCAAGTCTGACCCAGCC  
ATCCCGCGTGAAGGATGAAGGATCTATGGTTTCGTAAACTTCTTTTATTGGGGAAGAAAAA

GCCTGATTTATCAGGAACTGACGGTACCCAATGAATAAGCACCGGCTAACTCCGTGCCAG  
CAGCCGCGGTAAACGGAGGGTGCAAGCGTTATCCGGATTCACTGGGTTTAAAGGGTGCG  
TAGGCGGCTTTATAAGTCATTGGTGAAAGCTCGCAGCTTAACTGCGAAACTGCCATTGAA  
ACTGTTTAGCTTGAATGTGGTTGAAGTGGGCGGAATACAACATGTAGCGGTGAAATGCTT  
AGATATGTTTTAGAACACCGATTGCGAAGGCAGCTCACTAAGCCAATATTGACGCTGAGG  
CACGAAAGCGTGGGTAGCAAACAGGATTAGAAACCCTTGTAGTCC

>Otu1635

CCAGCCTATGGGGTGCTCCAGTCGAGAATATTCGACAATGGGCGAAAGCCTGATCGAGCG  
ACGCCGCGTGTTAGGATGAAGGCCTTCGGGTCGTAAACTACGGTAGTAACATAACAATGTA  
AATGAGTGTGTTACGGAAAGAGGTTGGTAACTACGTGCCAGCACCCGCGGTAAAACGTAG  
ACCTCAAGCGTTATCCGGATTTATTGGGCGTAAAGCGCGTGTAGGAGGTTTTGTGCGTCT  
TCTGTTAAAGCCCACCGCCTAACGGTGGAAGTGCAGGAGATACGGCAGAACTAGAGGAGG  
TTAGAGGTGCATGGAACACCGGTGTAGGGGTGAAATCCGTTGATATCGTGGGGAACACC  
AAAGGCGAAGGCATTGCACTGGGACCTTCCTGACTCTGAGACGCGAAAGCGTGGGGAGCA  
AAAAGGATTAGAAACCCTCGTAGTCC

>Otu1637

CCAGCCTATGGGAGGCTGCAGTGAGGAATATTGCGCAATGGACGAAAGTCTGACGCAGCA  
ACGCCGCGTGTTGGGATGAAGGCCTTTTAGGTCGTAAACCCTGTAGCAGGGGAAAAACAT  
CCCATTCGATGGGCTTGATGGTACCCTGAAAGTAAGCCTCGGCTAACTACGTGCCAGCAG  
CCGCGGTAATACGTAGGAGGCGAGCGTTGTCCGGATTTACTGGGTGTAAAGGGTCCGCGAG  
GCGGGCATCTAAGTCGGTGTTGAAATCCTTCAGCTTAACTGAAGAACTGCCTCCGATACT  
GGGTGCCTTGAATATAGGAGAGGGCAATGGAATTCCAGGTGTAGCGGTGAAATGCTTAGA  
TATCTGGAAGAACACCGGTTGCGAAGGCTGTTGCCTGGCCTATTATTGACGCTCATGGAC  
GAAAGCGTGGGGATCAAACAGGATTAGAAACCCGTGTAGTCC

>Otu1638

CCAGCCTATGGGGGGCACCAGGTAGGAATCTTTTGCAATGCGCGCAAGCGTGACAAAGCG  
AGCCAGAGTGCTTTTCAATGAAAAGCCTTTGCCAAATCTAAAAAGTTTGGAGAATAAGGA  
CTGGGTAAAGACTGGTGCCAGCCGCCGCGGTAATCCCAGCGGTCCAAGTCGCAGCCATCAT  
TATTGGGTCTAAAATATCCGTAGCTTGCTTGGTAAAGTTCCTTGTGAAATCTTATATCTCA  
AGTATAAGGCGTGCGAGGAATACTGCTGAGCTAGAGACTGGAAGACGTAAAAAGTATGTT  
CAAAGTAACGGTAAAATGTGTTAATCTTGAGCAGACTCACAACAGCGAAGGCATTTTACG  
AGGACAGTTCTGACAGTTAAGGATGAAGGCTAGGGGCGCAAAAAGGATTAGATACCCGGG  
TAGTCC

>Otu1640

CCAGCCTATGGGTGGCAGCAGTTAGGAATTTTGGGCAATGGGCGCAAGCCTGACCCAGCA  
ACGCCGCGTGGGTGACGAAGGCCTTCGGGTGTAAAGCCCTTTTCTGAGGGAAGATGATG  
ACGGTACCTCAGGAAGAAGCACCGGCTAACTACGTGCCAGCAGCCGCGGTAATACGTAGG  
GTGCGAGCGTTGCCCGGATTTATTGGGCGTAAAGGGCGCGTAGGCGGCCACGCACGTCCG  
TTGTGAACCTCGCCCGGCTCAACTGGGCGGGGTCAGCGGATACGGTGTGGCTTGAGCAAGC  
TAGGGGGCAATGGAATTCCTGGTGTAGTGGTGAATGCGTAGATATCGGGAGGAACACCA  
GTGGCGAAGGCGGTTGCCTGGAGCTTTGCTGACGCTGAGGCGCGAAAGCGTGGGGAGCGA  
TCCGGATTAGAGACCCCCGTAGTCC

>Otu1641

CCAGCCTACGGGGTGCAGCAGTCGAGAATCTTCGGCAATGGACGAAAGTCTGACCGAGCG  
ACGCCGCGTACGGGATGAAGTCTTCGGATTGTAAACCGCTGTCAGAGGGGATGAAGTAT  
ACGAGAGCTATCTCTTGATTTGACAGAGCCTCAGAGGAAGCACGGGCTAAGTTTCGTGCC  
AGCAGCCGCGGTAATACGAACTGTGCGAACGTTATTTCGGAATCACTGGGCTTAAAGGGTG  
CGTAGGCGGTTTTCTAAGTCAGGTGTGAAATCTTCGGCTCAACCGGAAAACCTGCGCCTG  
AGACTGGATAACTTGAGTGAGGTAGGGGTGTGTGGAACCTTCGGTGGAGCGGTGAAATGT  
GTAGAGATCGGAAGGAACGCCAGCAGCGAAAGCGGCACACTGGGCCTTTTCTGACGCTGA  
GGCACGAAAGCTAGGGTAGTGAACGGGATTAGAAACCCCAGTAGTCC

>Otu1642

CCAGCCTACGGGTCGCAGCAGTCGAGAATTTTCTCAATGGGGGAAACCCTGAAGGAGCG  
ACGCCGCGTGGGGGATGAATGGCGTCGGCCCGTAAACCCCTGTCATTTGCGAACAAGTTG  
CATCGCCTAACACGTGATGCATTGATTGTAGCGAAAGAGGAAGGGACGGCTAACTCTGTG  
CCAGCAGCCGCGGTAATACAGAGGTCCCAAGCGTTGTTTCGGATTCACTGGGCGTAAAGGG  
TGCGTAGGCGGTGAGGTAAGTCTGACGTGAAATCTCCGGGCTTAACCCGAAAACCTGCGTT  
GGATACTATCTCACTCGAGGAATGGAGGGGAGACTGGAATACTTGGTGTAGCAGTGAAAT

GCGTAGATATCAAGTGGGACACCAGTGGCGAAGGCGAGTCTCTGGACATTTCCCTGACGCT  
GAGGCACGAAAGCCAGGGGAGCAAACGGGATTAGATACCCGCGTAGTCC  
>Otu1643  
CCAGCCTATGGGGGGCTCCAGTAACGAATCTTCCGCAATGCACGAAAGTGTGACGGAGCG  
ACGCCGCGTGGGGGACGAAGCCCTTCGGGGTGTAACCCTGTGAGGGGATAGAAAGCTC  
TGATCATCCCCAGAGGAAGGCACGGCTAACTCTGTGCCAGCAGCCGCGGTAAGACAGAGG  
TGCCAAGCGTTAGGCGGAATCACTGGGCTTAAAGCGTGTGTAGGCGGGTTCGTAAGTACC  
TTGTGAAATCCCACGGCTTAACCGTGAACTGCTCGGTATACTGCGAGTCTTGAGCCAAC  
TAGGGGCTACTGGAACAAATGGTGGAGCGGTGAAATGCGTAGATATCATTTGGAACGCCA  
ATGGTGA AACAGGTAGCTGGGGTTGTGCTGACGCTGAGACACGAAAGCCAGGGGAGCAA  
ACGGGATTAGATACCCTCAGTCC  
>Otu1644  
CCAGCCTACGGGGTGTCAGCAGTACGGAATATTGGACAATGCACGACAGTGTGATCTAGTG  
ATATTCCTCAAGTGATGATAGCCGAGTAGGCCGTAAAGCTTTTTATAAAAACTGAATAAT  
GACTAACGTTTTTTAAGAAAAAGTCCTGGCCAACTCTGTGCCAGCAGCCGCGGTAAGACAG  
GGGGGGCAAGCGTTATTTCGTCTTGACTGGGCGTAAAGGGTTCGTAGGCGGTTAGTCTAAA  
TTAACGGTAAATCCTAGGGTAAATCTTAGAGGCTGTTTTCAATTAGTTGAACCTTGAGTTT  
ACGTTGCGTCAGCGGAATTTTTTTGGAGTAGTAAAATGCGTAGATATTAAAAGGAATACC  
AATGGTGAAGACAACCTGACTAGCTATAACTGACGCTGAGGAACGAAGGCGTAGGTAGCAA  
ACAGGATTAGAAACCCCGGTAGTCC  
>Otu1648  
CCAGCCTACGGGGTGCTGCAGTTAGGAATTTTGC GCAATGGACGAAAGTCTGACGCAGCG  
ACATCGCGTGAAGGATGAAGGCCCTCGGGTCGTAACTTCTTTTATTTTGCCAAGAAGGC  
ATTTTGAATCAACAGCTACTAACTACGTGCCAGCAGTCGCGGTAATACGTAGGCTGTAAG  
CGTTACCCGGTTTTATTGGGCGTAAAGAGTCTGTAGGTGGTTTGATAAGTCTTGTTTTCAA  
AGACCCCGGCTTAACCGGGGGCAGGGGCAGGATACTGTCAGACTAGAGTGATATCGGGGT  
TACTGGAATTTGTAGTGTAGGGGTAAATCCGTGGATACTACAAAGAACACCAAGCGCGA  
AGGCGGGTAACCAGGTATTTACTGACACTCAGAGACGAAAGCTAGGGTAGCCAATCAGAT  
TAGATACCCTAGTAGTCC  
>Otu1649  
CAGCCTATGGGGGGCAGCAGTCGAGGATCTTTTCGCAATGGGCGCAAGCCTGACGAAGCGA  
CGCTGTGTGGACGATGAAGGCCTTCGGGTTGTAAAGTCCTTTTCGCGTAAGAACAAGAGAG  
ACTGTCTAATAAGCAGTTAATTTGAGGGTCTACGTAAAGAAGCACCGGCTAACTCCGTG  
CCAGCAGCTGCGGTAATACGGAGGGTGCAAGCATTAAATCGGATTTACTGGGCGTAAAGGG  
CGCGTAGGCGGATCTACAAGTCAAATGTGAAATTCCGGAGCTCAACTTCGGAGCGGCATT  
TGAAACTGTAGGTCTATAGAGGGATGGCGGAGAAAATGGAATTCCACATGTAGCGGTGAA  
ATGCGTAGATATGTGGAAGAACACCAGTGGCGAAAGCGGCTTTCTAGCTATTACCTGACG  
CTGAGGCGCGAGAGCATGGGGAGCAAACAGGATTAGATACCCTGTAGTCC  
>Otu1651  
CCAGCCTACGGGTCGCTGCAGTGGGGAATATTGGACAATGGGCGCAAGCCTGATCCAGCA  
ATGCCGCGTGGGTGAAGAAGGTCTTCGGATTGTAAAGCCCTTTTCGACGGGGACGATGATG  
ACGGTACCCGTAGAAGAAGCCCCGGCTAACTTCGTGCCAGCAGCCGCGGTAATACGAAGG  
GGGCTAGCGTTGCTCGGAATGACTGGGCGTAAAGGGCGCGTAGGCGGTTTGAACAGTTGG  
GCGTGAAATTCCAGGGCTTAACCTTGGGACTGCGTTCAATACGTTTAGACTTGAGTTTCGG  
AAGAGGGTCGTGGAATTCCAGTGTAGAGGTGAAATTTCGTAGATATTGGGAAGAACACCG  
GTGGCGGAGGCGGACCTGGTCCGAAACTGACGCTGAGGCGCGAAAGCGTGGGGAGCAA  
ACAGGATTAGAAACCCCTGTAGCC  
>Otu1654  
CCAGCCTATGGGGGGCTCCAGTGGGGAATATTGGACAATGGGCGAAAGCCTGATCCAGCC  
ATGCCGCGTGAATGATGAAGGCCTTAGGGTTGTAAAGTCTTTTGCCAGGGAAGATAATG  
ACGGTACCTGGAGAATAAGCACCGGCTAACTTCGTGCCAGCAGCCGCGGTAATACGAAGG  
GTGCTAGCGTTGTTTCGGAATTACTGGGCGTAAAGAGCGCGTAGGCGGTTGTACTAGTCAG  
AGGTGAAATCCCGGAGCTTAACCTCCGGAACCTGCCTTTGAACTGTGCAGCTGGAGTGTGT  
GAGGGGATAGCGGAATCTTAATGTAGAGGTGAAATTTCGTAGATATTAAAGAGGAACACCG  
GTGGCGAAGGCGGCTATCTGGCGCACAACTGACGCTGAGGCGCGAAAGCGTGGGGATCAA  
ACAGGATTAGAAACCCGAGTAGTCC  
>Otu1656  
CCAGCCTACGGGAGGCTGCAGTCGAGAATTTTTCTCAATGGGCGAAAGCCTGAAGGAGCG

ACGCCGCGTGGGGGATGAATGGCTTCGGCCCGTAAACCCCTGTCATTTGCGAACAAACCT  
TTTCATTTAATATGTGAAAAGCTGATTGTAGCGAAAGAGGAAGAGACGGCTAACTCTGTG  
CCAGCAGCCGCGGTAATACAGAGGTCTCAAGCGTTGTTTCGGATTCACTGGGCGTAAAGGG  
TGCGTAGGTGGCGGGGCAAGTCTGACGTGAAATCTCCGGGCTTAACCCGAAATGGCGTT  
GGAAACTGCCTTGCTAGAGGATTGGAGGGGAGACTGGAATACTTGGTGTAGCAGTGAAAT  
GCGTAGATATCAAGTGGAACACCAGTGGCGAAGGCGAGTCTCTGGACAGTTCCTGACGCT  
CATGCACGAAGGCTAGGGGAGCAAACGGGATTAGAGACCCCAGTAGTCC

>Otu1663

CCAGCCTATGGGGTGCTCCAGTCGAGAATTTTTCTCAATGGGGGAAACCCCTGAAGGAGCG  
ACGCCGCGTGGAGGATGAAGGCTTTCGGGTGTAAACTCCTGTCATTTGGGAACAAGGCC  
TTACGTTAACTGCGTGGAGGATTGATAGTACCAGAAGAGGAAGAGACGGCTAACTCTGTG  
CCAGCAGCCGCGGTAATACAGAGGTCTCAAGCGTTGTTTCGGATTCAATTGGCGTAAAGGGC  
GCGTAGGCGGCGAGGTAAGTCTGGTGTGAAATCTAGGAGCTCAACTCCTAAACTGCACTG  
GATACTGCTTTGCTTGAGGACTGGAGAGGAGATTGGAATTCACGGTGTAGCAGTGAAATG  
CGTAGATATCGTGAGGAAGACCAGTGGCGAAGGCGGATCTCTGGACAGTTCCTGACGCTG  
AGGCGCGAAGGCCAGGGGAGCAAACGGGATTAGAAACCCGTGTAGTCC

>Otu1668

CCAGCCTACGGGTCGCTGCAGTCGAGAATCATTCGCAATGGGCGAAAGCCTGACGATGCG  
ACGCCGTGTGTATGATGAAGGCCTTCGGGTGTAAAGTACTTTCGCCTGGGAACAAGAGA  
TGGTGGCTAACATCCATCAAATTTGAGGGTACCAGGTAAAGAAGCACCGGCTAACTCCGT  
GCCAGCAGCTGCGGTAATACGGAGGGTGCAAGCATTAAATCGGATTTATTGGGCGTAAAGG  
GCGCGTAGGCGGGCTCGTAAGTCAGATGTGAAAGCCCGGGGCTCAACCCCGGAACAGCAT  
TTGAAACTGCAAGTCTAGAGGGTAGGCGGAGAAAACAGAATTCCACAAGTAGCGGTGAAA  
TGCGTAGATATGTGGAAGAATACCGGTGGCGAAGGCGGTTTTCTAGCTTATACCTGACGC  
TGAGGCGCGAAAGCAAGGGGATCAAACAGGATTAGATACCCCCGTAGTCC

>Otu1670

CAGCCTATGGGGGGCTGCAGTGGGGAATATTGGACAATGGGCGAAAGCCTGATCCAGCCA  
TGCCGCGTGAGTGATGAAGGCCTTAGGGTTGTAAAGCTCTTTTATCAGGGAAGATGATGA  
CGGTACCTGAAGAATAAGCACCGGCTAACTTCGTGCCAGCAGCCGCGGTAATACGAAGGG  
TGCTAGCGTTGTTTCGGAATCACTGGGCGTAAAGCGTGCGTAGGCGGCTTATCAAGTCAGG  
GGTGAATCCTGGGGCTCAACCCCGAATTTGCCTTTGAAACTGGTAAGCTTAAGTCTCGG  
AGGGGATAGCGGAATTGCTAATGTAGAGGTGAAATTCGTAGATATTAGCAGGAACACCGG  
TGCGCAAGGCGGCTATCTGGACGAGTACTGACGCTCTGGCACGAAAGCGTGGGGATCAAA  
CAGGATTAGAGACCCTGGTAGTCC

>Otu1680

CAGCCTATGGGGGGCAGCAGTCGAGAATCTTCGGCAATGGGCGCAAGCCTGACCGAGCGA  
CGCCGCGTGCGGGATGAAGGCCCTTGGGTGTAAACCGCTGTGAGAGGGGATGAAGTGCG  
GGTGGGCAATCCATCCGTTTGACATAGCCTCAGAGGAAGCACGGGCTAAGTTCGTGCCA  
GCAGCCGCGGTAATACGAACTGTGCAAACGTTATTTCGGAATCACTGGGCTTAAAGGGTGC  
GTAGGCGGCCATTTAAGTAGGGTGTGAAAGCCCCCGGCTCAACCGGGGAATTGCGTCCTA  
AACTGGCTGGCTAGAGTGAGATAGAGGTGTGCGGAACCTCCGGTGGAGCGGTGAAATGTG  
TTGATATCGGAAGGAACGCCGGTGGCGAAAGCGGCACACTGGGTCTCAACTGACGCTGAG  
GCACGAAAGCCAGGGGAGCGAACGGGATTAGAAACCCTAGTAGTCC

>Otu1681

CCAGCCTATGGGGTGCAAGCAGTCGAGGATCTTCGTCAATGGGCGCAAGCCTGAACGAGCG  
ACGCCGCGTGGGCGATGAAGGCCTTTCGGGTGTAAAGCCCTTTAGTGGGGGAGGAAAGCG  
CAAGCTTGACCTATCCAAGAATAAGCACGGGCTAAGTTCGTGCCAGCAGCCGCGGTAAG  
ACGAACCGTGCGAACGTTGTTTCGGAATCACTGGGCTTAAAGGGCGCGTAGGCGGTCTGTC  
AAGTCAGGGGTGAAAGCCTCCAGCTTAACTGGAGAAGTGCCTTTGATACTGGCGGACTCG  
AGTGAGGTAGGGGTAGTGGGAACCTCCGGTGGAGCGGTGAAATGCGTTGATATCGGAAGG  
AACGCCGGTGGCGAAAGCGCACTACTGGACCTCTTCTGACGCTGAGGCGCGAAAGCCAGG  
GGAGCAAACGGGATTAGAAACCCTTGTAGTCC

>Otu1685

CCAGCCTATGGGACGCAGCAGTGGAGAATCTTGGACAATGGGCGAAAGCCTGATCCAGTC  
ACGTTGCGTGAAATCTTTCTTTTTTCAATGAAAATCATGACTGTAATTGAAGAATAAGTC  
CTGGCTAACCTCGTGCCAGCAGCCGCGGTAAGACGAGGAGGACAAGCGTTCTTCGGTATC  
ACTAGGCGTAAAGTCCAGTAAGGTGGTTACTCAATCAAAGAACCTTCAACTGAAAGAAAAG  
TTCAGCAAGTTCCAAGAAAGTCACTAGAGTTATAAGAAAGAAAAGGAATTTCCAAAGTA

GTAGTAAAATACGTTGAGATTGGAAGGAAGACCGAAGGCGAAGGCATTTTTCTCCTTTTA  
ACTGACACTGATCTGGGAAAGTCTGGGGAGCAAATGGGATTAGATACCCGTGTAGTCC  
>Otu1686  
CCAGCCTATGGGAGGCAGCAGTGGGGAATATTGGACAATGGGCGAAAGCCTGATCCAGCA  
ATGCCGCGTGTGTGAAGAAGGCCTTCGGGTGTAAAGCACTTTCAGTGGGGAGGAAAGCT  
TTAAGGTTAATACCCTTCAAAGATTGACGCTACCTGCAGAAGAAGCACTGGCTAACTCTG  
TGCCAGCAGCCGCGGTAATACAGAGAGTGCAAGCGTTAATCGGAATCACTGGGCGTAAAG  
CGCGCGTAGGTGGATATCTAAGTCGGATGTGAAAGCCCTGGGCTTAACCTAGGAAGTCA  
TCCGATACTGGATGACTAGAGTATGGTAGAGGGAAGTGGAATTTCCGGTGTAGCGGTGAA  
ATGCGTAGATACCGGAAGGAACACCAGTGGCGAAGGCGACTTCCTGGACCAATACTGACG  
TTCATGTGCGAAAGCGTGGGGAGCAAACAGGATTAGATACCCCCGTAGTCC  
>Otu1688  
CCAGCCTATGGGTCGCGAGCAGTGGGGAATTTTGGACAATGGGCGCAAGCCTGATCCAGCC  
ATGCCGCGTGAGTGAAGAAGGCCTTCGGGTGTAAAGCTCTTTTGTCCGGGAGCAAACCT  
TAGTGGTTAATAACCGCTGAGCTGAGAGTACCGGAAGAATAAGCACCGGCTAACTACGTG  
CCAGCAGCCGCGGTAATACGTAGGGTGCAAGCGTTAATCGGAATTACTGGGCGTAAAGCG  
TGCGCAGGTGGTTGTGCAAGTCTGATGTGAAATCCCCGAGCTCAACTTGGAAGTGCATT  
GGAGACTGCATGACTAGAGTACGTCAGAGGGGGGTGGAATTCACGTGTAGCAGTGAAAT  
GCGTAGAGATGGGGAGGAACACCGATGGCGAAGGCGAGCCCCCTGGGTGACACTGACGCT  
CATGCACGAAAGCGTGGGGAGCAAACAGGATTAGAAACCCTGGTAGTCC  
>Otu1689  
CCGCCTACGGGATGCTGCAGTGGGGAATATTGGACAATGGGCGAAAGCCTGATCCAGCAA  
TGCCGCGTGAGTGATGAAGGCCTTAGGGTGTAAAGCTCTTTTACCCGGGATGATAATGA  
CAGTACCGGGAGAATAAGCTCCGGCTAACTCCGTGCCAGCAGCCGCGGTAATACGGAGGG  
AGCTAGCGTTATTCGGAATTACTGGGCGTAAAGCGCACGTAGGCGGCTTTGTAAGTAAGA  
GGTGAAGCCTGGTGTCAACACCAGAACTGCCTTTTAGACTGCATCGCTTGAATCCAGG  
AGAGGTGAGTGGAATTCGAGTGTAGAGGTGAAATTCGTAGATATTCGGAAGAACACCAG  
TGGCGAAGGCGGCTCACTGGACTGGTATTGACGCTGAGGTGCGAAAGCGTGGGGAGCAAA  
CAGGATTAGAAACCCCTGTAGTCC  
>Otu1690  
CCAGCCTATGGGGGGCTCCAGTCGAGGATCTTCGGCAATGGGCGCAAGCCTGACCGAGCG  
ACGCCGCGTGTCGATGAAGGCCTTCGGGTGTAAAGCACTGTGAGGGGGAGAAAGCCG  
CAAGGTTGATCAATCCCTGGAGGAAGCACGGGCTAAGTTTGTGCCAGCAGCCGCGGTAAG  
ACGAACCGTGCGAACGTTATTCGGAATCACTGGGCTTAAAGGGCGTG TAGGCGGGTCAGC  
AAGTCTGTGGTGAAAGCCTCCAGCTTAACTGGAGAAGTGCCGTGGATACTGTTGATCTTG  
AGGGAGGTAGGGGCATGTGGAACCTCCGGTGGAGCGGTGAAATGCGTAGATATCGGAAGG  
AACGCCGCTGGCGAAAGCGACGTGCTGGACCTCTTCTGACGCTGAGGCGCGAAAGCTAGG  
GGAGCAAACGGGATTAGATACCCCAGTAGTCC  
>Otu1692  
CCAGCCTACGGGTTGCACCAGTTTCGAATCATTCACAATGGGGGCAACCCTGATGGTGCG  
ACGCCGCGTGGGGGATGAAGGTCTTCGGATTGTAAACCCCTGTCACCTGGGACAAAACCT  
CGGCGAAGAGCCGAGCTGATTCAACCAGGAGAGGAAGCAGTGGCTAACTCTGTGCCAGCA  
GCCGCGGTAATACAGAGACTGCAAGCGTTACTCGGATTCAGTGGGCGTAAAGGGAGCGCA  
GGTGGGCAAGTGTGTCGGGCGTGAAATCCTGGGGCTTAACTCCAGAACGCGCCCCGAAAC  
TACTTGTCTGGAGGATTGGAGAGGCAGACGGAATTCAGGTGTAGCGGTGAAATGCGTAG  
ATATCTGGAGGAACACCGACGCGGAAGGCACCTCTGCTGGACAAATCCTGACACTCAGGCT  
CGAAAGCGTGGGGAGCAAAAGGATTAGAGACCCGTGTAGTCC  
>Otu1693  
CCAGCCTACGGGGTGCTCCAGTAGGGAATATTGCGCAATGGGCGAAAGCCTGACGCAGCG  
ACGCCGCGTGAGTGATGAAGGCCTTAGGGTCGTAAAGCTCTGTTGTAAGGGAAAATTATG  
ATGGTACCTTATAAGAAAGGACCGGCTAACTTCGTGCCAGCAGCCGCGGTAAGACGAGGG  
GTCTTAGCGTTGTTTCGGAATCATTTGGGCGTAAAGCGCATGTAGGCGGCCTATCAAGTCAG  
GTGTGAAATCCCTGGGCTCAACCCAGGACGTGCACTTGATACTGGTGGGCTTGAATATAG  
GAGAGGATAGTGGAAGTCCAGGTGTAGTGGTGAAATACGTAGATATCTGGAGGAACACCG  
GCGGCGAAGGCGGCTATCTGGCCTAATATTGACGCTGAGATGCGAAAGTGCGGGGATCAA  
ACAGGATTAGAAACCCGAGTAGTCC  
>Otu1695  
CCAGCCTACGGGGGGCAGCAGTCGAGAATCTTCCTCAATGGCCGAAAGGCTGAAGGAGCG



ACGCCGCGTGGACGATGAAGGCCTTCGGGTCGTAAAGTCCTTTTTTCGGGGACGAACAAA  
TGACGGTACCCGAAGAATAAGAGGTTGCTAACTCTGTGCCAGCAGCAGCGGTAATACAGA  
GACCTCGAGCGTTATCCGGAATTATTGGGCGTAAAGGGTCCGCAGGTGGCTTGGAAGTC  
ATGCGTCAAATATTTGGGCTCAACCCAGATGCTGCGTGTGATACTGCTCGGCTTGAGGCT  
GGGAGAGGTGCATGGAATTACTGGTGTAGCGGTAAAATGCGTTAATATCAGTAAGAACAC  
CAAAGGCGAAGGCAATGCACTGGAACAGTCCTGACACTCAGGGACGAAAGCGTGGGGAGC  
GAAAGGGATTAGAAACCCTAGTAGTCC

>Otu1696

CCAGCCTACGGGGGGCAGCAGTTTCGAATCATTACAAATGGGGGCAACCCTGATCCAGCG  
ACGCCGCGTGTGTGAAGAAGGCCTGCGGGTTGTAAAGCACTTTTAGTGGGGATGAAAAGT  
TCAGGGCTAATATCCTTGGGCATTGACCTAACCCACAGAAAAAGCACCGGCTAACTCTGT  
GCCAGCAGCCGCGTAATACAGAGGTTGCAAGCGTTAATCGGAATTACTGGGCGTAAAGC  
GTGCGTAGACGGTTCCGTAAGTCGGGTGTGAAAGCCCCGGGCTCAACCTGGGAATTGCAT  
TCGAGACTGCGAAGCTAGGGTACGGAAGAGGGAAGCGGAATTTCTGGTGTAGCGGTGAAA  
TGCGTAGATATCAGAAGGAACATCAGTGGCGAAAGCGGCTTCCTGGTCCAGTGCCGACGT  
TCAAGCACGAAAGCGTGGGGAGCAAACAGGATTAGAAACCCTCGTAGTCC

>Otu1698

CCAGCCTATGGGTCGCTGCAGTGGGGAATATTGCACAATGGGCGCAAGCCTGATGCAGCG  
ACGCCGCGTGGGGGATGACGGCCTTCGGGTTGTAAACCTCTTTCACCATTGACGAAGTCT  
GTGGGTTTTCTTGCAGGTGACGGTAGGTGGAGAAGAAGCACCGGCCAACTACGTGCCAGC  
AGCCGCGTAATACGTAGGGTGCAGCGTTGTCCGGAATTACTGGGCGTAAAGAGCTCGT  
AGGTGGTTTTGTCGCGTTGTTCTGTAATCTCACGGCTTAACTGTGAGCGTGCGGGCGATA  
CGGGCAGACTGGAGTACTGCAGGGGAGACTGGAATTCCTGGTGTGGCGGTGGAATGCGCA  
GGTATCAGGAGGAACACCGGTGGCGAAGGCGGCTCTCTGGGCAGTAACTGACGCTGAGGA  
GCGAAAGCGTGGGGAGCGAACAGGATTAGATACCCGTTAGTCC

>Otu1700

CAGCCTATGGGGGGCAGCAGTGGGGAATTTTGCACAATGGGGGAAACCCTGACGCAGCAA  
CGCCGCGTGGAGGATGAAGTACTTCGGTACGTAAACTCCTTTTCGATCGGGACGATTATGA  
CGGTACCGGAAGAAGAAGCCCCGGCTAACTTCGTGCCAGCAGCCGCGGTAATACGAGGGG  
GGCAAGCGTTGTTTCGGAATTATTGGGCGTAAAAGGTGCGTAGGCGGTTTTGTAAAGTCTGA  
TGTGAAATCTATGGGCTCAACTCATAGACTGCATCGGAAACTGCAGGGCTTGAGTGTGGG  
AGAGGTGAGTGAATTCCTGGTGTAGCGGTGAAATGCGTAGATATTCGCAAGAACACCAG  
TGCGCAAGGCGGCTCACTGGCCCCGATACTGACGCTGAGGTGCGAAAGCGTGGGGAGCAAA  
CAGGATTAGATACCCAGTAGTCC

>Otu1703

CCAGCCTATGGGGGGCAGCAGTGGGGAATCTTGCACAATGGGCGAAAGCCTGATGCAGCG  
ACGCCGCGTGGAGGATGACGGCCTTCGGGTTGTAAACTCCTTTTGCAGGGGAAGATAATG  
ACGGTACCCTGCGAATAAGCCATGGCTAACTCTGTGCCAGCAGCCGCGGTAAGACAGAGG  
TGCGGAGCGTTGTTTCGGAATTACTGGGCTTAAAGGGCGCGTAGGCGGTGATGTAAGTCTG  
GGGTGGAATTCCACAGCTTAACTGTGGAATTGCCCTGGAAACTGCATTGCTTGAGTCGGA  
CAGGGGAAGGCGGAATTCCAGGTGTAGCGGTGAAATGCGTAGATATCTGGAGGAAGGCCT  
GTGGTGAAGACGGCCTTCTGGGTCTTGACTGACGCTGAGGCGCGAAAGCGTGGGTAGCAA  
ACAGGATTAGAGACCCGCGTAGTCC

>Otu1705

CCAGCCTATGGGTGGCAGCAGTCGAGAATCTTCGGCAATGGGCGCAAGCCTGACCGAGCG  
ACGCCGCGTGTGGGATGAAGGCCTTCGGGTTGTAAACCACTGTCGGAGGGGAGGAAATAC  
ATGTGGGTACTCTCACATGCTTGACCTAACCTCGGAGGAAGGACGGGCTAAGTTCGTGCC  
AGCAGCCGCGGTAAGACGAACCGTCCGAACGTTATTTCGGAATTACTGGGCTTAAAGGGTG  
CGTAGGCGGCGGAGAAAGTAGGGTGTGAAATCCCTCGGCTTAACCGAGGAAGTGCCTCT  
AACTACTTTGCTCGAGGGAGATAGAGGTGAGCGGAACCTGGGGTGGAGCGGTGAAATGC  
GTTGATATCCTAAGGAACACCGGTGGCGAAAGCGGCTCACTGGATCTCTTCTGACGCTGA  
GGCACGAAAGCTAGGGTAGCGAACGGGATTAGAAACCCTTGTAGTCC

>Otu1710

CCAGCCTACGGGTGGCTCCAGTGAGGAATATTGCGCAATGCCCCGAAAGGGTGACGCAGCG  
ACGCCGCGTGGAGGATGAAGGCCCTATGGGTCGTAAACTCCTTTTTCGAGGGGAAGAACAG  
AGCGCTACAGGCGCTCGTGACGGTACCTCGAGAAAAAGCATCGGCTAACTACGTGCCAGC  
AGCCGCGGTAATACGTAGGATGCGAGCGTTGTCCGGAATCACTGGGTGTAAAGGGAGCGC  
AGGCGGGTTCGGTAAGTCATTGGTGAATTTTCGGGCTCAACCCGAAGACTGCCACTGATA

CTGCCGATCTTGAGTGTGGAAGAGGTTGGTGGAAATTCATGGTGTAGCGGTGAAATGCGTA  
GATATCATGAAGAACACCGATGGCGAAGGCAGCCAACTGGTCCATTACTGACGCTCATGC  
TCGAAAGCGTGGGGATCAAACAGGATTAGAGACCCGCGTAGTCC

>Otu1711

CCAGCCTACGGGAGGCAGCAGTGGGGAATATTGGTCAATGGGCGGAAGCCTGAACCAGCC  
ATGCCGCGTGCAGGAAGACGGCCCTACGGGTGTAACTGCTTTTGTGCCAGAATAAACC  
CTCGTTCGTGAATGAGGTTGAATGTATGGTAAGAATAAGGATCGGCTAACTCCGTGCCAG  
CAGCCGCGTAATACGGAGGATCCGAGCGTTATCCGGATTTATTGGGTTTAAAGGGTGCG  
TAGGCGGCTTTGTAAGTCAGGGGTGAAAGACGGTAGCTTAACTATCGCAGTGCCTTTGAT  
ACTGCAGGGCTTGAATGTACTTGAGGTAGGCGGAATGTGACAAGTAGCGGTGAAATGCAT  
AGATATGTCACAGAACACCAATTACGAAGGCAGCTTACTAAAGTATGATTGACGCTGAGG  
CACGAAAGCGTGGGGATCAAACAGGATTAGATACCCCAGTAGTCC

>Otu1715

CCAGCCTATGGGTGCTGTCAGCCGAGAATATTCGACAATGGGCGAAAGCCTGATCGAGCG  
ACGCCGCGTGACTGATGAAGTCCTTCGGGACGTAAAGGTCTTTTGTGAGGTAGAAAGTTA  
TTGATCGCCTCAAGAATAAGGGGTTGCTAAACTCGTGCCAGCAGCAGCGGTAATACGAGT  
GCCCCAAGCGTTATCCGGAATCATTGGGCGCAAAGGGTGTGTAGGCGGTTATATTAGTCT  
CTTGTTAAAGCTCCCGGCTCAACCGGGAAAAATGCAAGAGAAACGGTATGACTAGAGGATG  
CGAGAGGTGAACGGAACCTCATAGTGTAGGGGTGAAATCCGTTGATATTATGGGGAACACC  
AAATGCGAAGGCAGTTCCTGCGCACTCCTGACGTTGAAACACGAAAGCGTGGGTAGCG  
AATGGGATTAGAAACCCTTGTTAGTCC

>Otu1716

CCAGCCTATGGGTGGCAGCAGTAACGAATATTGGGCAATGGGCGAAAGCCTGACCCAGCG  
ACGCCGCGTGTGGGAAGAAGTCTTCGGAATGTAAACCACTGTCAGGGATTACCAAGCAA  
GTGCGCCTAATATGCGCGCAAGTTGAGGCGTCCAGAGGAAGCCACGGCTAACTTCGTGC  
CAGCAGCCGCGGTAATACGAAGGTGGCAAGCGTTGTTTCGGAATCACTGGGCTTAAAGCGC  
ACGTAGGCGGCCCATCAAGTGCCTTGTGAAATCCCCCGGCTCAACCGAGGAATTGCTTGG  
CATACTGTTGGGCTTGAGGCAGGTAGGGGCGAGTGGAACCTTGGGTGGAGCGGTGGAATG  
CGTAGATATCAAGAGGAACGCCGGTGGCGAAAGCGACTCGCTGGGCCTGTCTGACGCTG  
AGGTGCGAAAGCCAGGGGAGCAAACGGGATTAGATACCCCTCGTAGTCC

>Otu1719

CCAGCCTACGGGGGGCAGCAGCTAAGAATCTTCCGCAATGGACGAAAGTCTGACGGAGCG  
ACGTCGCGTGGGTGATGAAGCGGAAACGTTGTAAAGCCCTTTTATAGACGAGGAATAAG  
GTGGGGAGGGAATGCCCTGCTGATGACGGTAGTCTGTGAATAAGCCCCGGCTAATTACGT  
GCCAGCAGCCGCGGTAACACGTATGGGGCGAGCGTTGTTTCGGAATTATTGGGCGTAAAGG  
GCATGCAGGCGGTCTTATAAGTCTGGTGTGTAAACCCGCAGCTTAACTGCGGAGCCGCAC  
TGGAACCTGTGGGACTAGAGTACAGGAAGGGGAGTTGGAATTCAGGTGTAGGGGTGAAA  
TCTGTAGATATCTGGAAGAACATCAGTGGCGAAGGCGAACTTCTGGCCATGTACTGACGC  
TGAGATGCGAAAGCGTGGGGAGCAAACAGGATTAGATACCCCTTGTTAGTCC

>Otu1720

CCAGCCTACGGGGTGCAGCAGTGAGGAATTTTTCGCAATGGGGGAAACCCTGACGCAGCG  
ACGCCGCGTGGAGGATGAAGGCCTTCGGGTGCTAAACTCCTGTCAGAGGTGAAGAAGGCC  
CGCAAGGGCTTGACGGTAACCTCAGAGGAAGCCCCGGCTAACTACGTGCCAGCAGCCGCG  
GTAATACGTAGGGGGCAAACGTTGCTCGGAATTACTGGGCGTAAAGGGTGAGTAGGCGGC  
TTGGCAAGTCATGGATGAAATCCCGCAGCTCAACTGCGGAACGGTCCTTGAAACTGCCTG  
GCTTGAGGATAGTTGAAGAGAATGGAGTTCCCGGTGGAGCGGTGAAATGCGTAGATATCG  
GGAGGAACACCAGAGGCGTAGGCGATTCTCTAAGCTACTCCTGACGCTGAATCACGAAAG  
CTAGGGGAGCAAACGGGATTAGAGACCCTCGTAGTCC

>Otu1722

CCAGCCTATGGGATGCTGCAGTCGAGAATTTTCTCAATGGGGGAAACCCTGAAGGAGCG  
ACGCCGCGTGGAGGATGAAGGTCTTCGGATTGTAAACTCCTGTCATTTGGGAACAATTGT  
CACCGGTTAACTGCCGGGGGCTTGATAGTACCAGAAGAGGAAGGGACGGCTAACTCTGTG  
CCAGCAGCCGCGGTAATACAGAGGTCCCAAGCGTTGTTTCGGATTCAATTGGGCGTAAAGGG  
TGCGTAGGTGGTGGCGTAAGTTGGATGTGAAATCCCGGAGCTCAACTCCGGAACCTGCATT  
CAATACTGCGGCGCTCGAGTACTGGAGAGGAGATCGGAATTCACGGTGTAGCAGTGAAAT  
GCGTAGATATCGTGAGGAAGACCAGTGGCGAAGGCGGATCTCTGGACAGTTACTGACACT  
GAGGCACGAAGGCCAGGGGAGCAAACGGGATTAGATACCCGCGTAGTCC

>Otu1724

CCAGCCTATGGGTTGCTGCAGTCGAGGATCTTCGGCAATGGGCGCAAGCCTGACCGAGCG  
ACGCCGCGTGCGGGATGAAGGCCTTCGGGTGTAAACCGCTGTCAGAGGGGATGAAATGT  
ATGAGGGTACTCTCTCATACTTGACATAGCCTCAAAGGAAGTACGGGCTAAGTTTCGTGCC  
AGCAGCCGCGGTAAGACGAACCGTACATACGTTATTTCGGAATTACTGGGCTTAAAGGGTG  
CGTAGGCGGCGGTGCAAGTTGGGTGTGAAATCCCTCGGCTCAACCGAGGAAGTGCCTCA  
AAACTGCATTGCTTGAGGGAGATAGAGGTGAGTGGAACTTAGGGTGGAGCGGTGAAATGC  
GTTGATATCCTAAGGAACACCAGTGGCGAAAGCGACTCACTGGGTCTCTTCTGACGCTGA  
GGCACGAAAGCTAGGGTAGCGAACGGGATTAGAAACCCGAGTAGTCC

>Otu1725

CCAGCCTACGGGTGGCACCAGTGGGGAATCTTGACAATGGGGGCAACCCTGATCCAGCG  
ATGCCGCGTGTGTGAAGAAGGCCTGCGGGTGTAAAGCACTTTTGTAGGGAAGAAAGGT  
TGGTGGTGAATAGCCATTGACTGTGACTGTACCTAAAGAATAAGCACCGGCTAACTCTGT  
GCCAGCAGCCGCGGTAATACAGAGGGTGCAAGCGTTAATCGGAATGACTGGGCGTAAAGG  
GCGAGTAGGCGGTTATATAGGTGTGGTGTGAAAGACACGGGCTTAACCTGTGGGTGTCAC  
CGCAAACGGTATGACTAGAGTGCAGTAGAGGGGAGTGGAAATTTCCGGAGGAGCGGTGAAA  
TGCGTAGATCTCGGAAGGAACACCGGTGGCGAAGGCGACTCTCTGGACTGCAACTGACGC  
TGAGGCGCGAAGGCGTGGGGAGCAAACAGGATTAGAGACCCTTGTAGTCC

>Otu1727

CCAGCCTACGGGTGCACCAGTGGGGAATATTGGACAATGGGCGCAAGCCTGATCCAGCA  
ATGCCGCGTGGGTGAAGAAGGTCTTCGGATTGTAAAGCCCTTTTCGGCGGGACGATGATG  
ACTGTACCCGCGAGAAGAAGCTCCGGCTAACTTCGTGCCAGCAGCCGCGGTAATACGAAGG  
GGGCTAGCGTTGCTCGGAATTACTGGGCGTAAAGGGCGCGTAGGCGGGTGTTTAAGTCAG  
AGGTCAAATCCCAGGGCTCAACCCTGGAAGTGCCTTTGATACTGGGCACCTAGAGTTCGG  
GAGAGGTGTGTGGAAGTCCGAGTGTAGAGGTGAAATTCGTAGATATTTCGGAAGAACACCA  
GTGGCGAAGGCGACACACTGGCCCCGATACTGACGCTGAGGCGCGAAAGCGTGGGGAGCAA  
ACAGGATTAGATACCCGAGTAGTCC

>Otu1729

CCAGCCTATGGGGGGCACCAGCAAGGAATATTGGACAATGGTGGCAACACTGATCCAGCC  
ATGCCGCGTGCAAGGATGAAGGCGCTACGCGTTGTAAACTGCTTTTGTACGGGAGAAAAAC  
TATCTACGTGTAGATAGCTGATAGTACCGTAAGAATAAGCATCGGCTAACTTCGTGCCAG  
CAGCCGCGGTAATACGAAGGATGCAAGCGTTATCCGGATTTATTGGGTTTAAAGGGTGCG  
TAGGCGGACTTATAAGTCAGTGGTGAAGAACCTGCAGCTTAAGTGTAGAAATGCCATTGAT  
ACTGTTAGTCTTGAGTACGGTCAAGGTAGGCGGAGTGTGTAATGTAGCGGTGAAATGCTT  
AGATATTACACAGAACACCGATTGCGAAGGCAGCTTACTGGGCCATTACTGACGCTGATG  
CACGAAAGCGTGGGGAGCGAACAGGATTAGAAACCCCTCGTAGTCC

>Otu1730

CCAGCCTATGGGGGGCTGCAGTAGGGAATATTGCGCAATGGAGGAAACTCTGACGCAGCG  
ACGCCGCGTGGGTGATGAAGGCCTTCGGGTGCTAAAGCCCTGTCGGAAGAGAAGAAAAAC  
GATTTGGCTAATATCCAAGTCGCTTGTTCGGTACCTTTAAAGGAAGCACCGGCTAACTACG  
TGCCAGCAGCCGCGGTAATACGTAGGGTGTAGCGTTGTTTCGGAATCATTTGGGCGTAAAG  
CGCGTGTAGGTGGTTAAGTAAGTTCGGGTGTGAAATCCCTCGGCTCAACCGAGGAAGTGCA  
TCCGAAACTGCTTAGCTAGAGGACGGTAGAGGAAGGTGGAATTTCCAAGTGTAGAGGTGAA  
ATTCGTAGATATTTGGAGGAATACCGGTGGCGAAGGCGGCCTTCTGGGCCGTTCTCTGACA  
CTGAGACGCGAAAGCGTGGGTAGCAAACAGGATTAGAGACCCTCGTAGTCC

>Otu1731

CCAGCCTATGGGTCGCTGCAGTCGAGAATCTTCCACAATGGACGAAGGTCTGATGGAGCG  
ACGCCGCGTGATTGATGAAGTCCTTCGGGACGTAAAGATCTTTTATGAGGGAAGAAGTTT  
ATTGACGGTACCTCATGAATAAGGGGCTCCTAATCTCGTGCCAGCAGGAGCGGTAATACG  
AGAGCCCCAAGCGTTATCCGGAATTATTGGGCGTAAAGGGTGCGTAGGCGGTTGTGTTAG  
TCATGTGTTAAAGGCCCGGGCTTAACCTTGGGACATGCACGCGAAACGGCACGACTTAGAA  
TGAAGGAGAGGTGTGCGGAGCTCATGGTGTAGGGGTGAAATCCGTTGATATCATGGGGAA  
CACCAAATGCGAAAGCAGCACACTGGCCTTTTATTGACGCTGAGGCACGAAAGCGTGGGT  
AGCGAATGGGATTAGAAACCCCTGGTAGTCC

>Otu1732

CCAGCCTATGGGGCGCAGCAGTCGAGGATCTTCGGCAATGGGCGCAAGCCTGACCGAGCG  
ACGCCGCGTGTGCGATGAAGGCCTTCGGGTGTAAAGCACTGTCGAGGGGAAGAAAGCCG  
CAAGGTTGATCGACCCCTGGAGGAAGCACGGGCTAAGTTTCGTGCCAGCAGCCGCGGTAAG  
ACGAACCGTGCGAACGTTGTTTCGGAATCACTGGGCTTAAAGGGCGCGTAGGCGGGTGGCC

AAGTCGGTGGTGAAATCCTCCAGCTTAACTGGAGAGCTGCCTTCGATACTGGTCGTCTGG  
AGGGGGTAGGGGCAGACGGAACCTTCCGGTGGAGCGGTGAAATGCGTAGATATCGGAAGGA  
ACGCCGGCGGGCGAAAGCGGTCTGCTGGACCCCCACTGACGCTGAGGCGCGAAAGCCAGGG  
GAGCAAACGGGATTAGATACCCCAGTAGTCC

>Otu1733

CCAGCCTATGGGGCGCTGCAGTCGAGAATCTTCCGCAATGGACGAAAGTCTGACGGAGCG  
ACGTCGCGTGGTTGATGAAGTTCTTAGGGATGTAAAAACCTTTTATGAGGGAGAAAGTTA  
TTGATAGTACCTCATGAATAAGGGGTTGCTAAACTCGTGCCAGCAGCAGCGGTAATACGA  
GTGCCCCAAGCGTTATCCGGAATTATTGGGCGTAAAGGGTGTGTAGGTGGTTTTGTAGT  
CTTGTGTTAAAGCTCCCGGCTCAACTGGGAAAATGCATAAGAAACGGCAAGACTAGAGGA  
TGCGAGAGGTGTGTAGAACTCATAGTGTAGGGGTGAAATCCGTTGATATTATGGGGAATA  
CCAAAAGCGAAGGCAGCACACTGGCGCACTCCTGACACTGAAACACGAAAGCGTGGGTAG  
CGAATGGGATTAGAAACCCTAGTAGTCC

>Otu1734

CCAGCCTACGGGGGGCAGCAGTCATGAATCTTCCCCAATGGCCGAAAGGCTGAGGGAGCG  
ACGCCGCGTGTATGATGAAGCTCTTCCGAGTGTAAATACTTTTCTCTGGGACGAATTTT  
GACTTTACCAGAGGAATAAGGAGCCGCTAACCTCGTGCCAGCAGCGGCGGTAATACGAGG  
GCTCCAAGCGTTATCCGGAATTATTGGGCGTAAAGGGTACGTAGGCGGTCTGACGCATCT  
TTCGTTAAATCTTCCGGGCTCAACCCGGAGGCTGCGGAAGAGATGGTCAGACTGGAGATCG  
GAAGAGGCAAGCGGAATTGTTGGTGTAGGGGTAAATCCGTTAATATCAACAAGAACACC  
AAAAGCGAAGGCAGCTTGCTAGGACGATTCTGACGCTGAGGTACTAAAGCGTGGGTAGCG  
AATAGGATTAGAAACCCGCGTAGTCC

>Otu1735

CCAGCCTATGGGTTCGCACCAGTGGGGAATCTTGCGCAATGGGCGAAAGCCTGACGCAGCG  
ACGCCGCGTGGGTGATGAAGGCCTTCCGGTGTAAAGCCCTGTGGGGAGGGACGAGTAAG  
TCGGAGCCAATACCTCCGGCGATGACGGTACCTCTTTAGCAAGCACCGGCTAACTCTGTG  
CCGGCAGCCGCGGTAAGACAGAGGGTGCAAACGTTGTTTCGGAATTACTGGGCGTAAAGCG  
TGTGTAGGCGGCCGTGAAAGTCGGATGTGAAAGCCCCGGGCTCAACTCGGGAAGTGCACC  
CGATACTGCATGGCTTGAGTACCGGAGAGGTTGGTGGAAATCTCGGTGTAGAGGTGAAAT  
TCGTAGATATCGAGAGGAACACCGGTGGCGAAGGCGGCCAACTGGACGAGTACTGACGCT  
GAGACACGAAAGCGTGGGGAGCAAACAGGATTAGAAACCCCAGTAGTCC

>Otu1736

CCAGCCTATGGGTTGCTCCAGTCGAGAATCTTTCGCAATGGGCGAAAGCCTGACGAAGCG  
ACGCCGTGTGAGCGAAGAAGGCCTTCCGGTGTAAAGCTCTTTCGCTAGGGAACAAGAAA  
GGGACGCTAATATCGTCCTGATTTGAGGGTACTTGGTAAAGAAGCACCGGCTAACTCCGT  
GCCAGCAGCTGCGGTAATACGGAGGGTGCAAGCATTGATCGGAATTACTGGGCGTAAAGG  
GCGCGTAGGCGGCTAGAAAAGTTGAATGTGAAATTCGCGGGCTCAACTGCGGAGCGGCAT  
TCAAACTCTTTAGCTCGAGCATAGTTAGGGAAAACGGAATTCACGTGTAGCGGTGAAA  
TGCGTAGATATGTGGAAGAACACCTGTGGTGAAGACGGTTTTCTGGGCTATTGCCGACGC  
TGAGGCGCGAAAGCTAGGGGAGCAAACAGGATTAGAAACCCTAGTAGTCC

>Otu1737

CCAGCCTACGGGGGGCAGCAGTCGAGGATTTTTCTCAATGGGGGAAACCCTGAAGGAGCG  
ACGCCGCGTGGGGGATGAAGGTCTTCCGATTGTAAACCCCTGTCATCTGGGAACAATGTG  
GTCAACCTAACACGTGGATCATTGATAGTACCGGAAGAGGAAGCAGTGGCTAACTCTGTG  
CCAGCAGCCGCGGTAATACAGAGACTGCAAGCGTTGTTTCGATTTCATTGGGCGTAAAGGG  
TGCGCAGGCGGTTCGGCTAAGTCGGATGTGAAATCTCACAGCCTAACTGTGATAGGTCATT  
CGAACTGGCCGGCTTGAGGACTGGAGAGGAGACTGGAATGGTTGGTGTAGCAGTGAAAT  
GCGTAGAGATCAACCAGAACACCGGTGGCGAAGGCGGGTCTCTGGACAGTTCCTGACGCT  
CAGGCACGAAAGCCAGGGGAGCAAACGGGATTAGATACCCGAGTAGTCC

>Otu1738

CCAGCCTATGGGAGGCTGCAGTGGGGAATATTGGACAATGGGCGCAAGCCTGATCCAGCC  
ATGCCGCGTGAGTGATGACGGCCTTAGGGTGTAAAGCTCTTTCGACGGGGACGATAATG  
ACGGTACCCGTAGAAGAAGCCCCGGCTAACTTCGTGCCAGCAGCCGCGGTAATACGAAGG  
GGGCTAGCGTTGTTCCGAATCACTGGGCGTAAAGCGCACGTAGGCGGATTGTTAAGTCGG  
GGGTGAAATCCTGAGGCTCAACCTCAGAACTGCCTCCGATACTGGCCATCTCGAGTTCGG  
AAGAGGTTGGTGGAACAGCTAGTGTAGAGGTGAAATTCGTAGATATTAGCTAGAACACCA  
GTGGCGAAGGCGGCCAACTGGTCCGACACTGACGCTGAGGTGCGAAAGCGTGGGGAGCAA  
ACAGGATTAGATACCCCTCGTAGTCC

>Otu1739

CCAGCCTACGGGACGCTGCAGTGGGGAATATTGGACAATGGGCGAAAGCCTGATCCAGCC  
ATGCCGCGTGAGTGAAGAAGGCCTTCGGGTGTAAAGCTCTTTCGACGGGGACGATGATG  
ACGGTACCCGTATAAGAAGCCCCGGCAAACCTTCGTGCCAGCAGCCGCGGTAATACGAAGG  
GGGCTAGCGTTGTTTCGGAATTACTGGGCGAAAAGCGAACGTAGGCGGTGTTCTTTGTCTAG  
AGGTGAAAGCCTGGGGCTCAACCCCAAGAATTGCCTTTGAAACGGGGACGCTTGAGTCCGA  
GAGAGGGTGGCGGAATTCCTAGTGTAGAGGTGAAATTCGTAGATATTAGGAAGAACACCA  
GTGGCGAAGGCGGCCACCTGGCTCGGTACTGACGCTCAGGTTGCGAAAGCGTGGGGAGCAA  
ACAGGATTAGAGACCCGTGTAGTCC

>Otu1740

CCAGCCTATGGGTCGCAGCAGTGAGGAATTTTCCGCAATGGGCGAAAGCCTGACGGAGCA  
ATGCCGCGTGTTGGGAAGAAGGCCTTCGGGTGCTAAACCACTGTGCAAGGGGACGATACTG  
ACGGTACCCCTTGGAGGAAGCCCCGGCTAACTACGTGCCAGCAGCCGCGGTAAGACGTAGG  
GGGCGAGCGTTATTTCGGAATTATTGGGCGTAAAGCGCTCGTAGGCGGGACAGGAAGTCCG  
TGAAGAAAGACCTGGGCTCAACTCAGGGAACGGCACGGATACTCTTGTTCTTGAGGCAGT  
CAGAGGGTGTATGGAATTCCTGGTGTAGCGGTGAAATGCGTAGATATCGGGAGGAACACCA  
GTGGCGAAGGCGATCACCTGGGGTTGTTCTGACGCTGAGGAGCGAAAGCTAGGGGAGCAA  
ACGGGATTAGATACCCGTGTAGTCC

>Otu1741

CCAGCCTATGGGTGGCTCCAGTCGAGAATCTTCGGCAATGGACGCAAGTCTGACCGAGCG  
ACGCCGCGTGCGGGATGAAGGCCTTCGGGTGTAAACCGCTGTGCGAGGGGATGAAATCG  
TGGTGGGTCTCTCCACCTCGTTGACATAGCCTCAAAGGAAGTGTGGGCTAAGTTCGTGCC  
AGCAGCCGCGGTAAGACGAACCACACAAACGTTATTTCGGAATTACTGGGCTTAAAGGGTG  
CGTAGGCGGCGCGGAAAGTAGGGTGTGAAATCCCTCGGCTCAACCGAGGAATAGCGCCCT  
AAACTACCGTGCTCGAGGGAGATAGAGGTGAGCGGAACTTAGGGTGGAGCGGTGAAATGC  
GTTGATATCCTAAGGAACACCGGTGGCGAAAGCGGCTCACTGGATCTCTTCTGACGCTGA  
GGCACGAAAGCTAGGGTAGCGAACGGGATTAGATACCCCCGTAGTCC

>Otu1746

CCAGCCTACGGGTCGCAGCAGTGGGGAATATTGGGCAATATGTGAAAACATGACCCAATG  
ATAATTCGAAAGTGAGAAATGGAAAGCATTATCGTTGTAAAACCTATTTTTTCAAAAATGA  
TAATGACAGTATTTGGAAAAGTAGCACTGGCTAATTCTGTGCCAGCAGCCGCGGTAATAC  
AGGGAGTGACAGCGTTATTTCGGCATAATTGGGTGTAAAGGATACGTAGGTTGATTTGGTT  
TGGAATTTTCATGAAATACTTAGGTTAAAGCTAAGAAAATTGAAAAAAGACATTAATT  
TGTTTTATTTACCCAAAATCTATGAGTTTAAGATAGGTTAAGAGAATTTCTTGTGTAAGAG  
TAGAATCTCTAAATATTTGAAGGACTACCAAATAGTTGCTAAAGCACTTTTCTAGCTTA  
AAACTGACACTGAGGTATGAAAGATTAAGGTATCAAACAGGATTAGAAACCCTGGTAGTC  
A

>Otu1751

CCAGCCTATGGGATGCAGCAGTGGGGAATATTGGATAATGGGCGAAAGCCTGATCCAGCC  
ATGCCGCGTGAGTGATGAAGGCCTTAGGGTTGTAAAGCTCTTTCAGTGGGGAAGATAATG  
ACGGTACCCACAGAAGAAGCCCCGGCTAACTTCGTGCCAGCAGCCGCGGTAATACGAAGG  
GGGCTAGCGTTGTTTCGGAATTACTGGGCGTAAAGCGCACGTAGGCGGATCGTTAAGTCGG  
GGGTGAAATCCTGGAGCTCAACTCCAGAACTGCCTTCGATACTGGCGATCTCGAGTCCGG  
AAGAGGTGAGTGGAATCCTAGTGTAGAGGTGGAATTCGTAGATATTAGGAAGAACACCA  
GTGGCGAAGGCGGCTCACTGGTCCGGTACTGACGCTGAGGTGCGAAAGCGTGGGGAGCAA  
ACAGGATTAGATACCCCAGTAGTCC

>Otu1753

CCAGCCTATGGGGGGCAGCAGTGGGGAATATTGGACAATGGGCGCAAGCCTGATCCAGCC  
ATGCCGCGTGAGTGATGAAGGCCTTAGGGTTGTAAAGCTCTTTCAGTGGGGACGATAATG  
ACGGTACCTAGACAAGAAGCCCCGGCTAACTTCGTGCCAGCAGCCGCGGTAATACGAGGG  
GGGCAAGCGTTGTTTCGGAATTATTGGGCGTAAAGGGTGCCTAGGCGGTTTGACAAGTCTC  
ATGTGAAATCTTCGGGCTCAACCCGAAGTCTGCATGGGAACTGTGCGGCTTGAGTATTG  
GAGAGGTGAGTGGAATTTCCGGTGTAGCGGTGAAATGCGTAGATATCGGAAGGAACACCT  
GTGGCGAAAGCGGCTCACTGGACAATAACTGACGCTGATGCACGAAAGCTAGGGGAGCAA  
ACAGGATTAGATACCCCCGTAGTCC

>Otu1754

CCAGCCTATGGGGGGCAGCAGTCTAGAAAATTTGGGCAATGGGCGAAAGCCTGACCCAGCG  
ACACCGCGTGAGAGATGAAGTCTTTCGGGATGTAAACTCCTGACAGGCGGAGCGATGCCG

TTTCGGAGTAACTGCCGAGACGGTGACGGTACTGCCAAAGGAAGCCCCGGCTAACTACGT  
GCCAGCAGCCGCGGTAATACGTAGGGGGCAAGCGCTGTCCGGATTTACTGGGCGTAAAGG  
GTGTGCAGGCGGACTGGCGTGTGATGGTGAAAGCTCCCGGCTTAACCGGGAAAGTGCTG  
TCGAAACTACCAGTCTTGAGGGCGGAAGAGGAACTGGAACCTCCGGTGTAGCGGTAAAA  
TGCGTAGATATCGGAAGGAACGCCGATAGCGAAGGCAGGTTTCTGGGACGTACCTGACGC  
TGAAACACGAAAGCTAGGGGAGCAAACAGGATTAGATAACCCAGTAGTCC

>Otu1755

CCAGCCTACGGGGGGCACCAGTGGGGAATCTTGACACAATGGGGGAAACCCTGATGCAGCA  
ACGCCGCGTGAGGGACGAAGGCTTTCTGAGTTGTAAACCTCTTTCAGCAGGGACGATTGT  
GACGGTACCTGCAGAAGAAGCACCGGCCAACTACGTGCCAGCAGCCGCGGTGATACGTAG  
GGTGCAAGCGTTGTCCGGATTTATTGGGCGTAAAGAGCTCGTAGGCGGTTTGGTAAGTCG  
GGTGTGAAATCCCCAGGCTCAACCTGGGGCTGCCACCCGATACTGCCCTGACTCGAGTCC  
GGTAGGGGACCATGGAATTCTGGTGTAGCGGTGAAATGCGCAGATATCAGGAGGAACAC  
CAGTAGCGAAGGCGGTGGTCTGGGCCGGTACTGACGCTGAGGAGCGAAAGCGTGGGTAGC  
AAACAGGATTAGATAACCCAGAGTCC

>Otu1757

CCAGCCTACGGGGGGCTGCAGTGGGGAATATTGGACAATGGGGGAAACCCTGATCCAGCC  
ATGCCGCGTGAACGATGAAGGCCTTCGGGTTGTAAAGTTCTTTTGACAGGGAAGATGATG  
ACTGTACCTGTAGAATAAGCACCGGCTAACTTCGTGCCAGCAGCCGCGGTAATACGAAGG  
GTGCTAGCGTTGTTCCGAATTACTGGGCGTAAAGGGCGCGTAGGCGGGTCGACAAGTTGG  
ATGTGAAAGCCCAGGGCTCAACCCTGGAATTGCAATCAAGACTGTCTTTCTTGAATTCGG  
TAGAGGTTGGTGGAATTCACAGTGTAGAGGTGAAATTCGTAGAGATTGGGAAGAACACCG  
GTGGCGAAGGCGGCTCACTGGCCCGTTACTGACGCTCAGGCGCGACAGCGTGGGGATCAA  
ACAGGATTAGATAACCTAGTAGTCC

>Otu1759

CCAGCCTACGGGTGGCTGCAGTCGAGAATTTTTCACAATGGGGGAAACCCTGATGGAGCG  
ACGCCGCGTGGGGGATGAATGGCTTCGGCCCGTAAACCCCTGTCATTCGGGATCAATGCC  
TACGGTTTAATAAATCGTGGGTTGATAGTACCGGAAGAGGAAGGGACGGCTAACTCTGTG  
CCAGCAGCCGCGGTAATACAGAGGTCCCAAGCGTTGTTCCGATTCACTGGGCGTAAAGGG  
TGCGTAGGTGGTGGGTAAGTCTGATGTGAAATCTCGGAGCTCAACTCCGAAACGGCATT  
GGATACTATTTCGGCTTGAGGATTGGAGGGGGGACTGGAATACTTGGTGTAGCAGTGAAAT  
GCGTAGATATCAAGTGGAACACCAGTGGCGAAGGCGAGTCCCTGGACAAATCCTGACACT  
AAGGCACGAAAGCTAGGGGAGCAAACAGGATTAGAGACCCCTGTAGTCC

>Otu1761

CCAGCCTACGGGGCGCTGCAGTAACGAATCTTCCGCAATGCACGAAAGTGTGACGGAGCG  
ACGCCGCGTGGAGGACGAAGTTCTTCGGAATGTAACTCCTGTCAGAGGAAAGAAAGTTC  
TGATCTACCTCAGAGGAAGAGGCGGCTAACTCTGTGCCAGCAGCCGCGGTAATACAGAGG  
CCTCGAGCGTTAGGCGGAATCACTGGGCTTAAAGCGTGTGTAGGCGGACTTCTAAGTACC  
TTGTGAAATCCCACGGCTTACCCGTGGAATGCTTGGTATACTGGTTGTCTTGAGCCACC  
TAGGGGCGAGTGGAACAAATGGTGGAGCGGTGAAATGCGTAGATATCATTTGGAACGCCA  
ATGGTGAAAACAACCTCGCTGGGGGTGTGCTGACGCTGAGACACGAAAGCCAGGGGAGCGA  
ACGGGATTAGAGACCCCAAGTAGTCC

>Otu1763

CCAGCCTACGGGTGGCACCAGTCGAGAATTTTTCACAATGGGCGCAAGCCTGATGGAGCG  
ACGCCGCGTGGGGGATGAAGGTTTTCGATCCGTAAACCCCTGTCATTTGCGAACAATGGT  
TATTCAATAACACTGGATAGCTTGATAGTAGCGGAAGAGGAAGGGACGGCTAACTCTGTG  
CCAGCAGCCGCGGTAATACAGAGGTCCCAAGCGTTGTTCCGATTCACTGGGCGTAAAGGG  
TGCGTAGGTGGCCGGGTAAAGTTCGGTGTGAAAGCTCGGAGCTCAACTCCGAAAAGTCATC  
GAATACTATCCGGCTGGAGGGTTCGAGGGGAGACTGGAATTCTCGGTGTAGCAGTGAAAT  
GCGTAGACATCGAGAGGAACACCAGTGGCGAAGGCGAGTCTCTGGACGACACCTGACACT  
GAGGCACGAAAGCCAGGGGAGCAAACAGGATTAGATAACCCCGTAGTCC

>Otu1764

CCAGCCTATGGGTCGCTCCAGTGGGGAATTTTGCGCAATGGGGGAAACCCTGACGCAGCA  
ACGCCGCGTGGAGGATGAAGCCCCTTGGGGTGTAACTCCTTTTCGATCGGGAAGATAATG  
ACGGTACCGATATAAGAAGCCCCGGCTAACTACGTGCCAGCAGCCGCGGTAAAACGTAGG  
GGGCCAGCGTTGCTCGGAATTACTGGGCGTAAAGGGTCCGTAGGCGGTGTGGCAAGTCGG  
TAGTGAAATCTCTGGGCTTAACCCAGAGGCTGCTGCCGAACTGCTATGCTAGAGTGTGA  
GAGAGGCGAGTGGAATTACGGGTGTAGCGGTGAAATGCGTAGATATCCGTAGGAACATCC

GAGGCGAAGGCGGCTCGCTGGATCACAACTGACGCTGAGGGACGAAAGCTAGGGGAGCAA  
ACAGGATTAGAGACCCGAGTAGTCC  
>Otu1765  
CCAGCCTACGGGATGCACCAGTAAGGAATATTGGTCAATGGAGGCAACTCTGAACCAGCC  
ATGCCGCGTGCAGGATGAAGGTCCTCTGGATTGTAACTGCTTTTATCAGGGAAGAAATC  
ACCTATTTCTATGGGTGTTGCCGTACCTGAGGAATAAGCACCGGCTAACTCCGTGCCAG  
CAGCCGCGGTAATACGGAGGGTGCAAGCGTTATCCGGATTTACTGGGTTTAAAAGGTGCG  
TAGGCGGATTTTAAAGTCAGTGGTGAAAACCTCCGAGCTTAACTCGGAACTGCCATTGAT  
ACTATTAATCCTGAATTTAGTTGAGGTTGGCGGAATGTGTCGTGTAGCGGTGAAATGCTT  
AGATATGACACAGAACACCGATTGCGAAGGCAGCTGGCTAACTAAAAATTGACGCTGAGG  
CACGAAAGTGTGGGGATCAAACAGGATTAGATACCCGAGTAGTCC  
>Otu1768  
CCAGCCTATGGGTTGCTCCAGCTGGGAATCTTCTGCAATACACGAAAGTGTGACAGAGCG  
AGCCAGAGTGCTTCTCATTGAGAAGCTTTTGCCAAATCTAAAAAGTTTGCGAATAAGGA  
CTGGGCAAGACTAGTGCCAGCCGCCGCGGTAATACTAGCTGTCCAAGTCGCAGCCATCTT  
TATTGGGTCTAAAACATCCGTAGCTTGTCTAGCAAGTTCTTTGTGAAATCTTATCTCTTA  
AGGATAGGGCGCGCATGGAGTACTACTAGGCTAGAGACTGGAAGACGTAAGAAGTACGTT  
TGAAGTAGCGGTTAAATGCGTTAATCTTAGACGGACTCACACAGCGAAGGCATCTTACG  
AGGACAGTTCTGACAGTGAGGGATGAAGGCCGGGGCGCAAATGGATTAGAAACCCCCG  
TAGTCC  
>Otu1769  
CCAGCCTATGGGAGGCAGCAGTAAGGAATATTGGACAATGGTGGCAACACTGGTCCAGCC  
ATGCCGCGTGCAGGATGACAGCCCTATGGGTCGTAACTGCTTTTGTACGGGAAAAAAAC  
ACTCTTCGTGAAAGAGTACTGATTGTACCGTAAGAATAAGGATCGGCTAACTCCGTGCCA  
GCAGCCGCGGTAATACGGAGGATCCAAGCGTTATCCGGATTCATTGGGTTTAAAGGGTGC  
GCAGGCGGAATTGTAAGTCAGTGGTGAAAGCCTGTTGCTTAACAACAGAACTGCCATTGA  
TACTGCAAATCTTGAGTACATTTGATGTGGGCGGAATGTGTGTCATGTAGCGGTGAAATGCT  
TAGATATGACACAGAACACCGATTGCGAAGGCAGCTCACAAAACCTGTAACCTGACGCTGAG  
GCACGAAAGCGTGGGTATCAAACAGGATTAGATACCCTCGTAGTCC  
>Otu1770  
CCAGCCTACGGGGCGCAGCAGCAACGAATATTCCGCAATGCGCGAAAGCGTGACGGAGCG  
ATGCCGCGTGCAGGATGAAGCCCCTCGGGGTGTAACTGCTGTGAGGTATAGCAAACAA  
ATGAGCAAACCCAAAGGAAGAGACGGCTAACTCTGTGCCAGCAGCCGCGGTAATACAGAG  
GTCTCGAGCGTTAATCGGAGTCACTGGGCTTAAAGGGTGCCTAGGCGGGTCTGTAAGTGT  
CTTGTGAAATCCCACGGCTCAACTGTGGAATTGCTCGATAGACTACGGATCTTGAGGTTG  
GTAGGGGTGCTGGAATCTAGGTGGAGCGGTGAAATGCGTAGATATCTAGAGGAACGCC  
GAAGGTGAAGACAAGCGACTGGGCCAATTCTGACGCTGAGGCACGAAAGCGTGGGGAGCA  
AACGGGATTAGAGACCCTTGTTAGTCC  
>Otu1771  
CCAGCCTATGGGAGGCACCAGTGGGGAATATTGGGCTATGGGCGAAAGCCTGACCCAGCG  
ACGCCGTGTGGGCGATGAAGGCCCTTCGGGTGTAAAGCCCTGTCAGGTGGGAAGAAGTCC  
CGGCAACGGGATTGACGGTACCACCGGAGGAAGCACCGGCTAACTCCGTGCCAGCAGCCG  
CGGTAATACGGAGGGTGCAGCGTTGTTCCGAATTACTGGGCGTAAAGGGCGCGTAGGTG  
GTTCCGTAAAGTCAGATGTGAAATCCCAGGCTCAACTTCGGAATGGCATCTGAAACTGCC  
GGACTCGAGTACAGAAGAGGGAAACGGAATTCCTGGTGTAGAGGTGAAATTCGTAGATAT  
CGGGAGGAACACCGGTGGCGCAGGCGGTTTCCTGGTCTGATACTGACACTGAGGCGCGAA  
AGCGTGGGGGGCAAACAGGATTAGATACCCTCGTAGTCC  
>Otu1773  
CCAGCCTATGGGGGGGCAGCAGTGGGGAATTTTGTGCAATGGGGGAAACCCTGTCACAGC  
GACACCGCGTGAGCGAAGAAGCCCTTTGGGGTGTAAAGCTCTGTCGGCTGGAACGAAAAA  
AATGACGGTACCAGCAAAGGAAGCATCGGCTAACTACGTGCCAGCAGCCGCGGTAAGACG  
TAGGATGCAAGCGTTGTCCGGATTTATTGGGCGTAAAGAGTTTCGTAGGCGGTTTCGTTAAG  
TCTGATGTTAAAGATCGGGGCTCAACCCCGGAGTGCATTGGATACTGGCGAGCTGGAGT  
GCGGTAGAGGTTAGTGGAATTCCCAGTGTAGCGGTGAAATGCGTAGATATTGGGAAGAAC  
ACCAGTGGCGTAGGCGACTAACTGGGCCGTAACCTGACGCTGAGGAACGAAAGCCAGGGGA  
GCGAATGGGATTAGATACCCCCGTAGTCC  
>Otu1776  
CCAGCCTACGGGTCGCACCAGCACCATTGGATTGTTGACGGTGGGTGGGGGCCTCGGGATT

GGTCTTACCCATGACGATCGCCACCTTGCACTCGGGGTCCATCGCTCCCGATGTCCACCA  
CTTACGTCCATTGATGAGGTAATCGTCGCCCTCGGGGGTGATGGCGCAGCCGATGTTGGT  
GGCGTCGGAGCTGGCCACGTCCGGCTCGGTCATGGAGAAGCATGAGCGGATCTCGCCCTC  
CAAGAGAGGGGACGAGCCAGCGGTCCTTGTGCTCCGGCGTGCCGAACAGGTTGAGGATCTC  
CATGTTGCCGGTGTGAGGCGCCGAGCAGTTGCAGGCCCGCGCCGCGAGGTGCGAGCGGCC  
CATGATCTCGGCCAGGGGTGCGTAATCCAGATTAGATAACCCGCGTAGTCC

>Otu1779

CCAGCCTACGGGTCGCACCAGTCGAGAATCATTCGCAATGGGCGAAAGCCTGACGATGCG  
ACGCCGTGTGAACGATGAAGGCCTTCGGGTGTAAAGTTCTTTTCGCCTGGGAACAAGAGA  
AGTTGATGAATAATCAGCTAATTTGAGGGTACTAGGTAAAGAAGCACCGGCTAACTCCGT  
GCCAGCAGCTGCGGTAATACGGAGGGTGCAAGCATTAATCGGATTTATTGGGCGTAAAGG  
GCGCGTAGGCGGGAATGTAAGTCAGATGTGAAAGCCCAGGGCTCAACCCTGGAACAGCAT  
TTGAAACTGCATTTCTAGAGGGTAGGCGGAGAAAACAGAATTCCACGTGTAGCGGTGAAA  
TGCGTAGATATGTGGAGGAATACCGGTGGCGAAGGCGGTTTTCTAGCTTATTCCTGACGC  
TAATGCGCGAAAGCAAGGGGAGCAAACAGGATTAGATAACCCCTCGTAGTCC

>Otu1780

CCAGCCTATGGGACGCTCCAGTGGGGAATATTGGACAATGGGCGCAAGCCTGATCCAGCC  
ATGCCGCGTGAGTGATGAAGGCCTTAGGGTTGTAAAGCTCTTTTGTGAGGGAAGATAATG  
ACGGTACCTGAAGAATAAGCACCGGCTAACTTCGTGCCAGCAGCCGCGGTAATACGAAGG  
GTGCTAGCGTTGTTTCGGAATTACTGGGCGTAAAGCGCGCGTAGGCGGTCTATCAAGTCAG  
AGGTGAAAGCCCTGGGCTCAACCCAGGAATTGCCTTTGAAACTGATAGACTTGAGTGTGCG  
GAGGGGATAGCGGAATTGCTAATGTAGAGGTGAAATTCGTAGATATTAGCAGGAACACCG  
GTGGCGAAGGCGGCTATCTGGACGACAACCTGACGCTGAGGCGCGAAAGCGTGGGGATCAA  
ACAGGATTAGATAACCCCGTAGTCC

>Otu1783

CCAGCCTATGGGTGGCTGCAGTCGAGAATCTTCCGCAATGGACGCAAGTCTGACGGAGCG  
ACGCCGCGTGATGGATGAAGTCTTTCGGGATGTAAACATCTTTTATGAGCGAGAAAGTTT  
ATTGATCAGCTCATGAATAAGGGGTTGCTAAACTCGTGCCAGCAGCAGCGGTAATACGAG  
TGCCCCAAGCGTTATCCGGAATTATTGGGCGTAAAGGGTGTGTAGGCGGTTTCATTAGTC  
TCCTGTAAATCTCCCGACTCAATCGGGATCCTGCAGGAGAAACGGTGAACCTAGAAGAT  
GCGAGAGGTTTGCGGAACTCATAGTGTAGGGGTGAAATCCGTTGATATTATGGGGAACAC  
CAAAGCGAAGGCAGCAAACCTAGCGCATTCTTGACGCTGAAACACGAAAGCGTGGGTAGC  
GAATGGGATTAGATAACCCCTGTAGTCC

>Otu1786

CCAGCCTATGGGATGCTGCAGTCGAGAATCTTCCGCAATGGACGAAAGTCTGACGGAGCG  
ACGTTACGTGAATGATGAAGCCCTTCGGGTGTAAAGTTCTTTTCTCTGGGAGGAAGCCG  
CAAGGCAGACAGTACCAGAGGAATAAGGGGATCCTAATTCTGTGCCAGCAGGAGCGGTAA  
GACAGAATCCCCGAGCGTTACCCGATTTATTGGGCGTAAAGGGTCCGTAGGTGGTCAAG  
TAAGTTGAAAGTTAAACTCATCGGCTTAACCTTTGAGGTGCTTTCAATACTGCTCGACT  
AGAGGATGTTAGGGGTGAACGGAACCGACGGAGTAGGGGTGAAATCCGTTGATATCGTCG  
GGAACACCAAAAAGCGAAGGCAGTTCACTAGGACAATCCTGACACTGAGGGACGAAAGCTA  
GGGAGCAAACGGGATTAGATAACCCGAGTAGTCC

>Otu1787

CCAGCCTACGGGTGCTGCCAGTCGAGAATCTTCCGCAATGGGCGCAAGCCTGACCGAGCG  
ACGCCGCGTGAGGATGAAGGCCTTCGGGTGTAAACTCCTGTGAGGGGGAAGAAGGGT  
CGAAAGACCTTGACTGATCCCTGGAGGAAGCACGGGCTAAGTTCGTGCCAGCAGCCGCGG  
TAAGACGAACCGTGCGAACGTTATTTCGGAATCACTGGGCTTAAAGCGCGCGTAGGCGGGA  
CGGTGCGTCGACTGCTGAAATCCCCCGGCTTAACCGGGGAACGGGCATCGATACGGCCAT  
CCTGGAGGAACGTAGGGGGACCTGGAACCTCCGGTGGAGCGGTGAAATGCGTTGAGATCG  
GAAGGAACGCCCGTGGCGAAAGCGAGGTCTTGACGTTTTCTGACGCTGAGACGCGAAAG  
CTAGGGGAGCGAACGGGATTAGAGACCCTAGTAGTCC

>Otu1788

CCAGCCTACGGGAGGCAGCAGTGAGGAATATTGCGCAATGGGGGAAACCCTGACGCAGCA  
ACGCCGCGTGAGTGAGGAAGGCCTTCGGGTGCTAAAGCTCTGTGAGTTGGAAAGAAATGT  
CTGATAGTTAATACCTTTTCAGGCTTGACGGTACCAACAGAGGAAGCACCGGCTAACTCCG  
TGCCAGCAGCCGCGGTAATACGGGGGGTGCAAGCGTTGTTTCGGAATTATTGGGCGTAAAG  
AGCGTGTAGGCGGCCGGATGTGTGAGATGTGAAAGCCCTGGGCTTAACCCAGGAAGTGCA  
TTTGAAACTATTTCGGCTTGAGTAGGGGAGAGGGAAGTGGAATTCCTGGTGTAGAGGTGAA



ATTCGTAGATATCAGGAGGAACACCGGTGGCGAAGGCGACTTCCTGGCCCTATACTGACG  
CTGAGACGCGAGAGCGTGGGTAGCAAACAGGATTAGAAACCCTCGTAGTCC  
>Otu1789  
CCAGCCTATGGGTGGCTGCAGTAACGAATCTTCCGCAATGCACGAAAGTGTGACGGAGCG  
ACGCCGCGTGTAGGATGAAGTCCTTCGGGATGTAACTACTGTCAGGGGTAAGAAAGTTC  
TGATCTACCCAGAGGAAGGGACGGCTAACTCTGTGCCAGCAGCCGCGTAATACAGAGG  
TCCCGAGCGTTAGGCGGAATCACTGGGCTTAAAGCGTGTGTAGGCGGATCGGTAAGTACC  
TTGTGAAATCCCACGGCTTAACCGTGGAACTGCTTGGTATACTGCCAGTCTTGAGCCAGC  
TAGGGGCTACCGGAACAAATGGTGGAGCGGTGAAATGCGTAGATATCATTTGGAACGCCA  
ATGGTGAACACAGGTAGCTGGGGCTGTGCTGACGCTGAGACAGGAAAGCCAGGGGAGCGA  
ACGGGATTAGAGACCCCCGTAGTCC  
>Otu1790  
CCAGCCTATGGGTCGCTGCAGTCAAGAACTTCCACAATGGACGAAAGTCTGATGGAGCG  
ACGCCGCGTGGTTGATGAAGTCCTTCGGGACGTAAAGACCTTTTATGAGGGAGGAGGTAA  
TTGACGTTACCTCATGAATAAGGGGCTCCTAACTCTGTGCCAGCAGGAGCGGTAATACAG  
AGGCCCCAAGCATTATCCGGAATCACTGGGCGTAAAGGGTGTGTAGGCGGTCTATTAGT  
CGTTTGTGAAAGATCTCGGGCTTACTCCGGGAGACGCAAGCGAAACGGTACGACTTCGAG  
GATGCGAGAGGTATATGGAACCTCATGGTGTAGGGGTGAAATCCGTTGATATCATGGGGAA  
CACCAAATGCGAAGGCAATATACTGGCGCACTCCTGACGCTGAAACACGAAAGCGTGGA  
ATCGAACGGGATTAGATACCCCCGTAGTCC  
>Otu1792  
CCAGCCTACGGGGGGCACCAGTGGGGAATTTTGGACAATGGGGGAAACCCTGATCCAGCA  
ACGCTGCGTGAAGGATGAAGGTCTTCGGATTGTAACTTCTTTTGTTCGGGACGAATACC  
CGCAAGGGCTTGACGGTACCGGACGAATAAGCCACGGCTAACTACGTGCCAGCAGCCGCG  
GTAAGACGTAGGTGGCGAGCGTTACTCGGAATCACTAGGCGTAAAGCGCGTGTAGGCGGG  
TGCTTAAGTCTGCTGTGAAATCTCCTGGCTCAACTGGGAGGGGTGAGCAGATACTGGGCG  
TCTGGAGTGAGGCAGGGGGTACTGGAATTCCTGGTGTAGCGGTGAAATGCGTAGATATCG  
GGAGGAACACCAATGGCGAAGGCAGGTACCTGGGCCTTTACTGACGCTAAGACGCGAAAG  
CTAGGGGAGCAAACAGGATTAGATACCCCTGTAGTCC  
>Otu1795  
CCAGCCTACGGGGGGCAGCAGTAGGGAATTTTGCAGCAATGGACGAAAGTCTGACGCAGCA  
ACGCCGTGTGGGTGATGAAGGTCTTCGGATCGTAAAGCTCTGTCAGGAGGGAAGAACTA  
TGCCATTAATACCGGCATACTGACGGTACCTCCAGAGGAAGCTCCGGCTAACTTCGTGCC  
AGCAGCCGCGGTAATACGAGGGGAGCTAGTGTGTTTCGGATTTACTGGGCGTAAAGGGAG  
TGTAGGCGGGCATCTAAGTCAGAGGTGAAATTTAGGGCTCAACCCTGAACTTGCCCTTCG  
ATACTGGGTGTCTTGAGTATGGAAGAGGTGATGGAATTCCTGGTGTAGCGGTGGAATGC  
GTAGAGATCAGGAGGAACGCCAATAGCGAAAGCAGTCGACTGGGACAATACTGACGCTGA  
AACTCGAAAGCATGGGGAGCAAACAGGATTAGAAACCCTGGTAGTCC  
>Otu1797  
CCAGCCTATGGGATGCAGCAGTGGGGAATTTTGCACAATGCCCCGAAAGGGTGTGACGCA  
ACGCCGCGTGAGGGATGAAGGCCTTCGGGTCGTAAACCTCTTTTCGACCGGGGAAAAACGGG  
CTGGTGAAGAGCCAGTCCTGATGGTACTGGTGGGAAGAAGCCCCGGCCAACTACGTGCCAG  
CAGCCGCGGTAATACGTAGGGGGCAAGCGTTGTTTCGGAATTACTGGGCGTAAAGGGCGTG  
TAGGCGGTGCGGTAAGTTGGGCGTGAAATCCCCGGGCTTAACCCGGGGGGGTGCTTCAAG  
ACTGCCGTGCTAGGGTGCGGGAGAGGGAAGTGGAAATTCCTGGTGTAGCGGTGAAATGCGT  
AGATATCGGGAGGAACACCTGCGGCGAAGGCGGCTTCCTGGACCGTAACCGACGCTGAGG  
CGCGAAAGCTAGGGGGGCAAACAGGATTAGATACCCGAGTAGTCC  
>Otu1799  
CCAGCCTACGGGGTGCTGCAGTCGAGAATCTTCCACAATGGACGAAAGTCTGATGGAGCG  
ACGCCGCATGATTGATGAAGTGCTTCGGCACGTAAAGATCTTTTATGGGGGAAGAAGTCT  
ATTGACGGTACCTCATGAATAAGGGGCTCCTAACTCTGTGCCAGCAGGAGCGGTAATACA  
GAGGCCCCGAGCGTTATCCGGAATTATTGGGCGTAAAGGGTGCCTAGGTGGCGATACTAG  
TCGTTTGTGAAAGATCCGGGCTCAACCTGGAAAACGCGAACGAAACGGTATTGCTTGAGT  
GAGGAAGGGGTAAAGCGGAACCTCAAGGTGTAGGGGTGAAATCCGTTGATATCTTGGGGAAC  
ACCAAAGCGAAGGCAGCTTACTGGTCCTTTACTGACACTGAAGCACGAAAGCGTAGGTA  
GCGAATGGGATTAGAGACCCGAGTAGTCC  
>Otu1801  
CCAGCCTACGGGGGGGCTGCAGTAACGAATCTTCGTCAATGCACGAAAGTGTGAACGAGCG

ACGCCGCGTGGAGGATGAAGTTCTTCGGAATGTAACTCCTGTCAGGGGAAAGAAAAGTTCTGATCTACCCAGAGGAAGGGACGGCTAACTCTGTGCCAGCAGCCGCGGTAAGACAGAGGTCCCAAGCGTTAGGCGGAATCACTGGGCTTAAAGCGTGTGTAGGCGGATTAGCAAGTACCTTGTGAAATCCCATGGCTCAACCATGGAAGTCTTGGTATACTGCTAGTCTTGAGGCATCTAGAGGCAACTGGAACAAACGGTGGAGCGGTGAAATGCGTAGATATCGTTTGGAAACGCCC AAGGTGAAAACAGGTTGCTGGGGATGTACTGACGCTGAGACACGAAAGCCAGGGGAGCAAACGGGATTAGAAACCCCAGTAGTCC

>Otu1802

CCAGCCTATGGGGGGCAGCAGTGAGGAATCTTGGACAATGAGCGAAAGCTTGATCCAGCAATGTCGCGTGAGTGATGCAGAACTATATCTATAAACTCTTTCGTCAAGGAAGATTATGACATTACTTGAAAAAGAAGCTCCGGCCAACCTCGTGCCAGCAGCCGCGGTAATACGGGGGGAGCTAGCGTTATTCGGGATAACTGGGCGTAAAGCGTGTGCCTACGGTTTATCATGTTAAAGTTAAATATCGGAGCACAACCTTCTAAAACTTTTAAAGACTGATATAAACTTAGAGTATGATTAGGGATAGTAGAATTTTTTAAAGTAGCAGTGAAATGTTTCAGATATTAAAAGGAATGC CACTAGGCGAAGGCAACTATCTGGATCAATACTGACGTGTCTACACGAAAGTATGGGGAGCAAACAGGATTAGAAACCCCAGTAGTCC

>Otu1805

CCAGCCTACGGGTCGCTCCAGTGGGGAATATTGGGCAATGGGCGAAAGCCTGACCCAGCCACGCCGCGTGAGTGATGAAGGCCTTTGGGTCGTAAAGCTCTGTGGAGGGGGACGAACAAGCGCGCATTTAATAGATGCGTGCCCTGACGGTACCCCTTTAGCAAGCACCGGCTAACCATGTGCCAGCAGCCGCGGTAATACATGGGGTGCAAACGTTGCTCGGAATTATTGGGCGTAAAGCGCGCTAGGCGGTTGCTTAAGTCAGATGTGAAAGCCCTCGGCTTAACTGAGGAAGTGCA CCTGAGACTGAGCAGCTAGAGTATGAAAGAGGGTCGCGGAATTCCCAGGTGTAGAGGTGAAATTCGTAGATATCGGGAGGAACACCGGCGGCGAAGGCGGCGACCTGGTTCAAGACTGACGCTGAGGCGCGAAAGCGTGGGGAGCAAACAGGATTAGATACCCCTGTAGTCC

>Otu1806

CCAGCCTATGGGGGGCACCAGTGGGGAATATTGGACAATGGGGGCAACCCTGATCCAGCAATGCCGCGTGAGTGATGAAGGCCTTAGGGTTGTAAAGCTCTTTTGGCGGGGACGATGATGACGGTACCCCGCAGAATAAGCCCCGGCTAACTTCGTGCCAGCAGCCGCGGTAATACGAAGGGGCGAGCGTTGTTTCGGAATTACTGGGCGTAAAGGGCGCGTAGGCGGCCGATCAAGTTAGATGTGAAAGTCCTGGGCTCAACCTGGGGACTGCATTTGATACTGATTGGCTTGAATCCGGGAGAGGATAGCGGAATTTCCAGTGTAGAGGTGAAATTCGTAGATATTGGGAAGAACACCA GTGGCGAAGGCGGCTATCTGGACCGGTATTGACGCTGAGGCGCGAAAGCGTGGGGAGCAAACAGGATTAGATACCCCTGTAGTCC

>Otu1807

CCAGCCTATGGGTCGCTGCAGGGAATATTGGACAATGGGCGAGAGCCTGATCCAGCCATGCCGCTGCAGGAAGAAGGCCTTCTGGGTTGTAACTGCTTTTGCCAGGGGATAAAAGACC CGTGCGCGGGGAATTGAAGGTACCTGGTGAATAAGCCACGGCTAACTACGTGCCAGCAGCCGCGTAATACGTAGGTGGCAAGCGTTATCCGGATTCACTGGGTTTAAAGGGTGCGTAGGTGGGCAGGTAAGTCAGTGGTGAAATCTCCGGGCTTAACCCGGAAGTACCCTGTTGATACTA TCTGTCTTGAATGTCTGTGGAGGTGGGCGGAATATGTCATGTAGCGGTGAAATGCTTAGATATGACATAGAACACCAATTGCGAAGGCAGCTCACTACACGATGATTGACGCTGAGGCACGATAGCGTGGGGATCAAACAGGATTAGATACCCCTGTAGTCC

>Otu1810

CCAGCCTATGGGACGCTGCAGTCGAGAATTTTTCTCAATGGGCGAAAGCCTGAAGGAGCGACGCCGCGTGAAGGATGAAGGTCTTCGGATTGTAACTTCTGTATTAGAGAACAATGCA TGGGGGAGTAACTGCCTCCATGTTGATAGTATCTGAAGAGGAAGAGACGGCTAACTCTGTGCCAGCAGCCGCGTAATACAGAGGTCTCAAGCGTTGTTTCGGATTCAATTGGGCGTAAAGGTGCGTAGGTGGTGGAATAAGTCGGATGTGAAATCTCGGGGCTTAACCCCGAACTGCAT TCGATACTGTTTTGCTGGAGGACTGGAGAGGAGATTGGAATTCGTGGTGTAGCAGTGAAATGCGTAGATATCATGAGGAAGACAGTGGCGAAGGCGGATCTCTGGACAGTTTCCTGACAC TGAGGCACGAAGGCCAGGGGAGCAAACGGGATTAGATACCCCTGTAGTCC

>Otu1812

CAGCCTATGGGTGGCTGCAGTAGGGAATATTGGACAATGGGGGCAACCCTGATCCAGCGATGCCGCGTGAGTGAAAGAAGGCCTTCGGGTCGTAAAGCTCTTTAGGTTGGGAAGAAGGGTATGTTGGTTAATAACCACGTACTTTGACGGTACCGACAGAATAAGCACCGGCAAACCTCTGTGCCAGCAGCCGCGTAAATACAGAGGGTGCGAGCGTTAATCGGAATTACTGGGTGTAAAGGCGCGTAGGCGGTAAGGTGTGTGTGGTGTGAAAGCCCCGGGCTTAACCTGGGAAGTGCATC

GCAAACCTATCTAACTAGAGTATATGAGAGGGTGGCGGAATTTCCGGTGTAGCGGTGAAAT  
CGGTAGAGATCGGAAGGAACGTCAATGGCGAAGGCAGCCACCTGGCATAATACTGACGCT  
GAGGCGCGAAAGCGTGGGGAGCGAACAGGATTAGAGACCCTCGTAGTCC

>Otu1813

CCAGCCTACGGGATGCTGCAGTGGGGAATTTTGCGCAATGGGCGAAAGCCTGACGCAGCA  
ACGCCGCGTGGAGGATGAAGGTCTTCGGATCGTAAACTCCTGTCGATGGGGACGAAAGCC  
GAAAGGTATGACTGTACCCGTTGAGGAAGCCACGGCTAACTCCGTGCCAGCAGCCGCGGT  
AATACGGAGGTGGCAAGCGTTGTTTCGGAATTACTGGGCGTAAAGGGCGCGTAGGCGGCTA  
AACAAAGTCAGATGTGAAAGCCCCGAGCTTAACTCGGGAATTGCATCTGAAACTGTATAGC  
TTGAGTTCTGGAGGGGTAGTGGAAATTCAGTGTAGCGGTGAAATGCGTAGATATTGGG  
AGGAACACCAGCGGCGAAGGCGGTACCTGGACAGTAACTGACGCTGAGGCGCGAAAGCT  
AGGGGAGCGAACGGGATTAGAAACCCCCGTAGTCC

>Otu1814

CCAGCCTACGGGACGCTGCAGTAACGAATATTCCGCAATGGGCGAAAGCCTGACGGAGCA  
ATGCCGCGTGTGGGATGAAGCGTTTCGCCGTGTAAACCACTGTCAGGGAATAGAAAAGA  
TGATCATTTCCAGAGGAAGGGGCGACTAACTCTGTGCCAGCAGTCGCGGTAAGACAGAGG  
CCCCGAGCGTTAGTCGGAATTACTGGGCTTAAAGGGTGCCTAGGCGGGCGTGTGAGTGT  
TCGTGAAAGCCCCGGGCTCAACCCGGGAACCGGGGCATACTGCACGTCTCGAAGGAGC  
TAGAGGCCGGTGGAACGATCGGTGGAGCGGTGGAATGCGTAGAGATCGATCGGAACGCCA  
AGGGTGAAGACAACCGGCTGGGGCTCTCTTGACGCTGAGGTACGAAAGCGTGGGGATCAA  
ACAGGATTAGAAACCCCCGTAGTCC

>Otu1815

CCAGCCTACGGGGGGCTGCAGTAAGGAATATTGGTCAATGGACGCAAGTCTGAACCAGCC  
ATGCCGCGTGAAGGATGAAGGCCCTCTGGGTGTAAACTTCTTTTATCTGGGAAGAAATC  
CACTGTTTTCTACGGTGGTTGACGGTACCAGAGGAATAAGCACCGGCTAACTCCGTGCCAG  
CAGCCGCGGTAATACGGAGGGTGCAAGCGTTATCCGGATTTACTGGGTTTAAAGGGTGCG  
TAGGCGGGCTTTTAAGTCAGTGGTGAAATCTCCGGGCTCAACTCGGAAATTGCCATTGAT  
ACTATTAGTCTTGAATTAAGTTGAGGTGGGCGGAATGTGTCATGTAGCGGTGAAATGCTT  
AGATATGACACAGAACACCGATTGCGAAGGCAGCTCGCTAAACTTATATTGACGCTGAGG  
CACGAAAGCGTGGGGATCAAACAGGATTAGAGACCCCAGTAGTCC

>Otu1816

CCAGCCTACGGGACGCTCCAGTCGAGGATCTTCGGCAATGGGCGCAAGCCTGACCGAGCG  
ACGCCGCGTGC GCGATGAAGGCCTTCGGGTGTGAAGCGCTGTGAGGGGGAGGAACGCC  
GCAAGGCCTGACCGACCCCTGGAGGAAGCACGGGCTAAGTTCGTGCCAGCAGCCGCGGTA  
AGACGAACCGTGCAACGTTGTTTCGGATTCACTGGGCTTAAAGGGCGCGTAGGCGGGCAA  
CCAAGTCAGGGGTGAAATCGTTCAGCTTAACTGGACAAGAGCCTTTGATACTGGTGGTCT  
TGAGGGAGGTAGGGGCAGGTGGAACCTCCGGTGGAGCGGTGAAATGCGTAGATATCGGAA  
GGAACGCCGGTGGCGAAAGCGGCCTGCTGGATCTCTACTGACGCTGAGGCGCGAAAGCCA  
GGGGAGCAAACGGGATTAGATACCCGTGTAGTCC

>Otu1817

CCAGCCTATGGGAGGCAGCAGTGGGGAATTTTGCACAATGGGCGAAAGCCTGATGCAGCA  
ACGCCGCGTGTGTGATGAAGGTCTTCGGATCGTAAAGCACTTTCGACTGGGACGAACAAG  
GCTGGCCACACCAGCCCCTGACTGTACCAGGAGAAGAAGCACCGGCTAACTCTGTGCCAG  
CAGCCGCGGTAATACAGAGGGTGCAAGCGTTGTTTCGGAATTATTGGGCGTAAAGCGCGTG  
TAGGCGGCTTAGCAAGTCGGGCGTGAAAGCCCTCGGCTCAACCGAGGAAGTGCACCCGAA  
ACTGCTGAGCTTGAGTGCCGGAGAGGATGGCGGAATTCCCCAAGTAGAGGTGAAATTCGT  
AGATATGGGGAGGAACACCGGTGGCGAAGGCGGCCATCTGGACGGTAACTGACGCTGAGT  
CGCGAAAGCGTGGGTAGCAAACAGGATTAGATACCCGCGTAGTCC

>Otu1820

CCAGCCTATGGGACGCAGCAGTCGAGAATCATTCGCAATGGGCGAAAGCCTGACGATGCG  
ACGCCGTGTGTGATGAAGGCCTTTGGGTGCTAAAGCACTTTCGCTTGGGAACAAGAGA  
AGCAGGCTAATACCCTGCTGATTTGAGGGTACCAGGTAAAGAAGCACCGGCTAACTACGT  
GCCAGCAGCTGCGGTAATACGTAGGGTGCAAGCATTAATCGGAATTATTGGGCGTATAGG  
GCGCGTAGGCGGGTAAACAAGTCGGATGTGAAATCCCAGAGCTCAACTCTGGAACAGCCT  
CCGAAACTGTAAATCTAGAGGGTAGGCGGAGAAAACGGAATTCACAAAGTAGCGGTGAAA  
TGCGTAGATATGTGGAAGAACACCCGTGGCGAAGGCGGTTTTCTAGCTTATTCCTGACGC  
TGAGGCGCGAAAGCAAGGGGATCAAACAGGATTAGAAACCCTAGTAGTCC

>Otu1822

CCAGCCTACGGGTGGCACCAGTAGGGAATATTGCACAATGGGCGAAAGCCTGATGCAGCA  
ACGCCGCGTGCGCGATGAAGGCCTTCGGGTCGTAAAGCGCTTCTCTGGGAGAAGAGGAAG  
GACACTATCCCAGGAATAAGGCTCGGCTAACTACGTGCCAGCAGCCGCGGTAAACGCTAG  
GAGCCAAGCGTTATCCGAATTCCTGCGGCTAAAGCGCGTGCAGGCGGTTTGGTAAGTTG  
GATGTGAAATCTCCCGGCTCAACTGGGAGAGGACGTTCAATACTGTCAGACTAGAGGGTG  
ACAGAGGGAGGTGGAATTCCCGGTGTAGTGGTGAAATGCGTAGATATCGGGAGGAACACC  
AGTGGCGAAAGCGGCCTCCTAGGTCGCACCTGACGCTCAGACGCGAAAGCTAGGGGAGCA  
AACGGGATTAGAGACCCGTGTAGTCC

>Otu1823

CCAGCCTACGGGAGGCAGCAGTCAAGAACCCTCCACAATGGACGAAAGTCTGATGGAGCG  
ACGCCGCGTGGTTGATGAAGTGCTTCGGCACGTAAAGACCTTTTATGAGGGAAGAAGTAT  
ATTGACGGTACCTCATGAATAAGGGGCTCCTAACTCTGTGCCAGCAGGAGCGGTAATACA  
GAGGCCCGGAGCGTTATCCGAATTATTGGGCGTAAAGGGTGCGTAGGTGGCGATGTTAG  
TCGTTTGTGAAAAGCCCGGGCTTAACCTCGGAAACGCGAACGAAACGGCATTGCTTGAGT  
AGAGAAGAGGTGTGCAGAACTCATGGTGTAGGGGTGAAATCCGTTGATATCATGGGGAAT  
ACCAAAGCGAAGGCAGCACACTGGTCTCATACTGACATTGAAGCACGAAAGCGTGGGTA  
GCGAATGGGATTAGATACCCTGGTAGTCC

>Otu1825

CCAGCCTATGGGGGGCTGCAGGCGCGAAACTTCGCAATGTGGGAAACCACGACGAGGGA  
ATCCCAAGTGCCAACGATTTTTCGTTGGCTGTTGCCCTGTCTAAAAAACAGGGAGAGTAA  
GGGCTGGGTAAAGACGGGTGCCAGCCGCGCGGTAAATACCCGCGGCCCAAGTGGTGCTCGT  
TATTATTGGGTTTAAACGTCCGTAGCCGGTTCGGTAAATTCCTGGGTAAATCGACTGGC  
CTAACAGTCGAATTCGGGGGAGACTGCCGGACTCGGGACCGGGGAGGTCCGAGGTACT  
TCCAGGGTAGGGGTGAAATCCTGTAATCCTGGGGGGACCACCAGTGGCGAAGGCGTCCGA  
CCAGAACGGCTCCGACGGTAAGGGACGAAGCCCTGGGGCGCAAACGGGATTAGAAACCTT  
TG TAGTCC

>Otu1826

CCAGCCTACGGGTGCGACCAGTCGAGAATAATTCACAATGGGGGCAACCCTGATGGTGCA  
ACGCCGCGTGAGGATGACAGTCTTCGGATTGTAAACTCCTGTCATCCGGGAGTAAGACC  
TGGCGGTTAACAGCCGACAGGGTTGATAGTACCGGAAGAGGAAGGGACGGCTAACTTCGT  
GCCAGCAGCCGCGGTAATACGAAGGTCCCGAGCGTTGTTTCGGATTCACTGGGCGTAAAGG  
GAGCGTAGGCTGCGCGGTAAAGTCAGATGTGAAATCCCGGGGCTCAACCCCGGAACCGCAT  
CCGATACTGCCGCGCTGGAGGATTGGAGAGGTAGCTGGAATTCCTGGTGTAGCAGTGAAA  
TGCGTGGATATCAAGAGGAACACTCGTGGCGAAAGCGAGCTACTGGACAACCTCCTGACGC  
TGAGGCTCGAAGGCCAGGGTAGCGAAAGGGATTAGAGACCCCTCGTAGTCC

>Otu1828

CCAGCCTATGGGACGCTCCAGTCGAGAATTTTTCACAATGGGGGAAACCCTGATGGAGCG  
ACGCCGCGTGGGGGATGAATGGCTTCGGCCCGTAAACCCCTGACATTTCGTGAACAAACGT  
TTCTACTGAACAAGTGGAATTTGATAGTAGCGGAAGAGGAAGGGACGGCTAACTCTGTG  
CCAGCAGCCGCGGTAATACAGAGGTCCCAAGCGTTGTTTCGGATTCACTGGGCGTAAAGG  
TGCGTAGGTGGTCGGGTAAGTCTGATGTGAAAGCTCGGAGCTTAACCTCCGAAATGGCATT  
GGATACTATCTGGCTGGAGGATCGGAGGGGGGACTGGAATTCCTCGGTGTAGCAGTGAAAT  
GCGTAGATATCGAGAGGAACACCAGTGGCGAAGGCGAGTCCCTGGACGATTCCCTGACACT  
GAGGCACGAAAGCTAGGGGAGCAAACAGGATTAGAAACCCGAGTAGTCC

>Otu1829

CCAGCCTATGGGACGCGAGCAGTAGGGAATATTGCTCAATGGGCGCAAGCCTGAAGCAGCA  
ATGCCGCGTGAAGGATGAAGGTCTTCGGATCGTAAACTTCTTTTGTGGGATGAAGAAA  
TTTGGGTAAATAGCCCAGAGATTTGACAGTACCAAAAGAATAACCACCGGCTAACTCCGT  
GCCAGCAGCTGCGGTAATACGGAGGGTGGAAGCGTTGATCGGATTGACTGGGCGTAAAGG  
GAGCGTAGGCGGCTCGATAAGTCGATGGTGAAATTTCTGGGCTTAACCCAGAAGCTGCCG  
TCGAAACTATCGAACTAGAGGACATTAAGGGAAAGCGGAATACCACATGTAGCGGTGAAA  
TGCGTAGATATGTGGTAGAACACCGGTGGTGAAGACGGCTTTCTGTGATGTTACTGACGC  
TGAGGCTCGAAAGCATGGGGATCAAACAGGATTAGAAACCCGGGTAGTCC

>Otu1831

CCAGCCTACGGGTGCGCTGCAGTTGGGAATCTTGGACAATGGGGGAAACCCTGATCCAGCC  
ATGCCGCGTGAGTGATGAAGGCCTTCGGGTTGTAAAGCTCTTTTACCCGGGAAGATAATG  
ACTGTACCGGGAGAATAAGCTCCGGCTAACTTCGTGCCAGCAGCCGCGGTAATACGAAGG  
GGGCTAGCGTTGTTTCGGAATTACTGGGCGTAAAGCGTGCGCAGGTGGTTTCCCAAGTCAG

TGGTGAAAGCCCCGGAGCTCAACTCCGGAATTGCCATTGAAACTGTGAGACTTGAGGACGA  
GAGAGGTGAGTGGAATTCACAGTGTAGAGGTGAAATTCGTAGATATTGGGAAGAACACCG  
GTGGCGAAGGCGGCTCACTGGCTCATTACTGACGCTCAGGCGCGACAGCGTGGGGATCAA  
ACAGGATTAGATACCCCTGTAGTCC

>Otu1833

CCAGCCTATGGGGTGCACCAGTCGAGGATTTTTCTCAATGGGGGAAACCCTGAAGGAGCG  
ACGCCGCGTGAGGGATGAAGGTCTTCGGATTGTAAACCTCTGTCATGCGGGATCAATGCA  
TCCGACCTAATACGTCGGGTGTTGATAGTACTGCAAGAGGAAGACGTGGCTGACTCTGTG  
CCAGCAGCCGCGGTAATACAGAGACGTGAGCGTTGTTTCGGATTTCATTGGGCGTAAAGGG  
TCCGACGGCGGTGCGGTAAGTCGGATGTGAAATTTTCGAGGCTTAACCTCGAACAGTCATT  
CGAAACTGCTCGGCTTGAGGAGTGGAGAGGAGACTGGAATTGTCGGTGTAGCGGTGAAAT  
GCGTAGAGATCGACAAGAACACCGGTGGCGAAGGCGGGTCTCTGGACACTTCCTGACGCT  
CAGGGACGAAAGCCAGGGGAGCAAACGGGATTAGAGACCCCCGTAGTCC

>Otu1836

CCAGCCTATGGGATGCAGCAGTGGGGAATATTGGACAATGGGCGCAAGCCTGATCCAGCA  
ATGCCGCGTGTGTGAAGAAGGCCTGCGGGTTGTAAAGCACTTTCAGTGGGGAGGAAGGCC  
TCGATGTTAATAGTATCGAGGATTGACGTTACCTACAGAAGAAGCACCGGCTAACTCTGT  
GCCAGCAGCCGCGGTAATACAGAGGGTGCAAGCGTTAATCGGAATTACTGGGCGTAAAGG  
GCGCGTAGGTGTTATTTAAGTCAGATGTGAAATCCCTGGGCTTAACCTAGGAATTGCAT  
TTGAAACTAGATGGCTAGAGTATGGTAGAGGGAAGTGAATTTCCGGTGTAGCGGTGAAA  
TGCGTAGATATCGGAAGGAACACCACTGGCGAAGGCGACTTCCTGGACCATTACTGACAC  
TGAGGCGCGAAAGCGTGGGGAGCGAACAGGATTAGAAACCCAGTAGTCC

>Otu1838

CCAGCCTATGGGGTGCTGCAGTGGGGAATCTTGCACAATGGGGGCAACCCTGATGCAGCG  
ACGCCGCGTGAGCGATGAAGGCCTTAGGGTTGTAAAGCTCTTTCATCAGGGACGATAATG  
ACGGTACCTGAAGAAGAAGCCCCGGCTAACTTCGTGCCAGCAGCCGCGGTAATACGAAGG  
GGGCTAGCGTTGTTTCGGAATCACTGGGCGTAAAGCGCACGTAGGCGGATCTTTAAGTCAG  
GGGTGAAATGCCAGGGCTCAACCTTGGAAGTGCCTTTGATACTGGAGATCTCGAGTCCGG  
GAGAGGTGAGTGGAAGTGCAGTGTAGAGGTGAAATTCGTAGATATTTCGAAGAACACCA  
GTGGCGAAGGCGGCTCACTGGCCCGTACTGACGCTGAGGTGCGAAAGCGTGGGGAGCAA  
ACAGGATTAGAGACCCGAGTAGTCC

>Otu1839

CCAGCCTATGGGGGGCTGCAGTCGAGAATTTTTCACAATGGGGGAAACCCTGATGGAGCG  
ACGCCGCGTGAGGATGAAGGCCCTCGGGTCGTAAACTCCTGTCATGCGGGAACAAGAAA  
GTGATAGTACCGCAAGAGGAAGAGACGGCTAACTCTGTGCCAGCAGCCGCGGTAATACAG  
AGGTCTCAAGCGTTGTTTCGGATTTCATTGGGCGTAAAGGGTGCGTAGGTGGCGGTGTAAGT  
CTAACGTGAAATCTCGGGGCTCAACCTCGAAATTGCGTCGGATACTGCATTGCTAGAGGA  
TTGTAGAGGAGAGTGAATTCATGGTGTAGCAGTGAATGCGTAGATATCATGAGGAAGA  
CCAGTTGCGAAGGCGACTCTCTGGGCAACTCTTGACACTGAGGCACGAAGGCTAGGGGAG  
CAAACGGGATTAGAAACCCAGTAGTCC

>Otu1840

CCAGCCTATGGGTGGCAGCAGTTAGGGAATTTTGACAATGGGCGCAAGCCTGATCGAGTG  
ACGCCGCGTGTGGGACGACGCCTTTTCGGGGTGTAAACCACTTTTCTCGGGGACGAGAACG  
GACGGTACCCGAGGAATAAGCCTCGGCTAACTACGTGCCAGCAGCCGCGGTAATACGTAG  
GAGGCGAGCGTTGTCCGGAATTACTGGGCGTAAAGCGCGCGTAGGCGGTTTCTTGCGTAG  
GCGGTGAAAGCCCCCGGCTCACCTGGGGGAAGGCCGCCTAAACGGGGAGACTTTGAGGGC  
GGTAGGGGCTGGCGGAACACCCGGAGTAGCGGTGAAATGCGTTGAGATCGGGTAGAACAC  
CAGTGGCGAAGGCGGCCAGCTGGGCCGTCCTGACGCTGAGGCGCGAAAGCCAGGGGAGC  
GAACGGAATTAGATACCCCTGTAGTCC

>Otu1844

CCAGCCTATGGGGTGCACCAGTCGAGAATTTTTCACAATGGGGGAAACCCTGATGGAGCG  
ACGCCGCGTGAGGATGAAGGTTTTTCGGATTGTAAACTCCTGTCACCACAGAACAAGCAA  
TGCAGGCTAATAATCTGCAAAGTTGATGGTATGTGGGGAGGAAGGGACGGCTAACTCTGT  
GCCAGCAGCCGCGGTAATACAGAGGTCCCAAGCGTTGTTTCGGATTCACTGGGCGTAAAGG  
GTGTGTAGGAGGTCATTTAAGTCTGATGTGAAATCCCGTCGCTCAACGACGGAAGTGCAT  
TGGATACTATTTGGCTAGAGGATCTGAGGGGGAAGCGGAATTCCTGGTGTAGCGGTGAAA  
TGCGTAGATATCAAGAGGAACACCCGTGGCGAAGCGGCTTCCTGGAAGATTCCTGACTC  
TGAAACACGAAAGGCAGGGGAGCGAATGGGATTAGAAACCCGGGTAGTCC

>Otu1847

CCAGCCTATGGGGGGCACCAGTCGAGAATTTTTCTCAATGGGCGAAAGCCTGAAGGAGCG  
ACGCCGCGTGAGGATGAATGGCTTCGGCCCGTAAACTCCTGTCATTTGCGAACAAACCT  
TACGATTTAACAGATTGTGAGCTGATTGTAACGGAAGAGGAAGGGACGGCTAACTCTGTG  
CCAGCAGCCGCGGTAATACAGAGGTCCCAAGCGTTGTTTCGATTCACTGGGCGTAAAGGG  
TGCGTAGGCGGTTTGACAAGTCTGATGTGAAATCCCGCAGCTTAACTGCGGAAGTGCATT  
GGAAACTGTCTGACTAGAGGAATGGAGGGGAGACTGGAATGCTTGGTGTAGCAGTGAAAT  
GCGTAGATATCAAGCGGAACACCAGTGGCGAAGGCGAGTCTCTGGACATTTCTCTGGCGCT  
GAGGCACGAAGGCCAGGGGAGCAAACGGGATTAGAAACCCGGGTAGTCC

>Otu1848

CCAGCCTATGGGTGGCACCAGGCGCGAAACCTTTACAATGCACGAAAGTGTGATAGGGGA  
ACTCAGAGTGCTTATGCTTTTTTGCATAAGCTTTTGCCAACTCAAATTTGGTTGGAGAATA  
AGTGGTGGGCAAGACTGGTGCCAGCCGCCGCGGTAACCCAGCGCCACAAGTGGGAATCA  
GTATTATTGGGCCTAAAGCGTCCGTAGCAGGTTTGTAAATTATTTGTGAAATCGCATCG  
CTCAACGTTGCGGATGGCAGATAAGACTGGCAAAGTGTGAGACTGGGAGACGTTGGAGGTA  
TTCAAAGGGGAGCGGTAAAATGCGAGAATCCTTTGAAGACCACCTGTTGCGAAGGCGTCC  
AACAATAACAGGTCTGACTGTGAGGGTGCAGGCTAGGGGAGCGAACCAGATTAGAGACC  
CTCGTAGTCC

>Otu1849

CCAGCCTATGGGGCGCTCCAGCAAAAGGACAAGTCGGTCGGGGCTCCATCACGCTATCAG  
CGATATGCGGGTACGGTCGCGAAAATAGTGCCAAAAGCCGGAACGCTCACTGCGGTGGAT  
GTTACTAGCGCTGCCGATACGATTGATGACGCTACCGAGCAGTATCTGAGGGACGAGAAT  
TTGCGGCAATGTCTCTCTGTGAGGGCACAGGCGAGCACAAACGATATCGCTGTCTCTATC  
TGCGAAGGCGACGGAAGCGTTCCAAGGGAAGCTGAATTTCGACCTTCGGGCATTCAAACAG  
GTGGAATGCCCTCTCTGCAAGGGGACGGGGACGCATAATCGATTTGAATGCCCGATTTCG  
TCGGGTATTGGAACGATCGATGAAGCTGCATTAGAGACCCCAGTAGTCC

>Otu1851

CCAGCCATGGGTGCGCTGCAGGTAGGAATCTTTTGCAATGCACGAAAGTGTGACAAAGCGA  
ATCAGAGTGCTTTTCAATGAAAAGCTTTTGTGAAATGTAAAAAGTTTCACGAATAAGGAC  
TGGGTAAGACGGGTGCCAGCCGCCGCGGTAATACCCGCGGTCCAAGTCGCAGTCATTTTTT  
ATTGGGTCTAAAACATCCGTAGCTTGCTTGCTGTAAGTTTCCTGTGAAATTCTGTCTCTCAA  
GGGCAGAGCGCGCAGGGAGTACTGCCTTGCTGGAGACTGGAAGACGTAAGAAGTATGTTT  
AAAGTAGCGGTAAAATGCGTTAATCTTGACAGACTAACAACAGCGAAGGCATCTTACGA  
GGACAGTTCTGACAGTAAGGGATGAAGGCTAGGGGCGCGAAACGGATTAGATACCCCAGT  
AGTCC

>Otu1853

CCAGCCTATGGGGTGCACCAGTCGAGAATCATTCGCAATGGGCGAAAGCCTGACGATGCG  
ACGCCGTGTGAGTGAAGAAGGCCTTCGGGTGCTAAAGCTCTTTCGCCTGGGAACAAGAGA  
AGCTGGCTAACATCCAGCGGATTTGAGGGTACCAGGATAAGAAGCACCGGCTAACTCCGT  
GCCAGCAGCTGCGGTAATACGGAGGGTGCAAGCATTAATCGGATTTATTGGGCGTAAAGG  
GCGCGTAGGCGGGAGACTAAGTCAGATGTGAAATCCCGGGGCTCAACCCCGGAACGGCAT  
TTGAAACTATTTTTCTTGAGGGTAGGCGGAGAAAACGGAATTCACAGAGTAGCGGTGAAA  
TGCGTAGATATGTGGAAGAACACCGGTGGCGAAGGCGGTTTTCTAGCTTATTCCTGACGC  
TGAAGCGCGAAAGCAAGGGGATCAAACAGGATTAGAAACCCTGGTAGTCC

>Otu1860

CCAGCCTACGGGAGGCAGCAGTAAGGAATATTGGTCAATGGACGCAAGTCTGAACCAGCC  
ATGCCGCGTGAGGATGAAGGTCCTCTGGATTGTAAACTTCTTTTCTCTGGGGCGAAAAA  
AGGATATTCTTATCCTCCTGACAGTACCAGAGGAATAAGCACCGGCTAACTCCGTGCCAG  
CAGCCGCGGTAATACGGAGGGTGCAAGCGTTATCCGGATTCCTGGGTTTAAAGGGTGCG  
TAGGAGGGCAGGTAAAGTCAGTGGTGAATCCCCGAGCTTAACTTGGGAAGTCCCGTTGAT  
ACTATCTGTCTTGAATATTGTGGAGGCAAGCGGAATATGTCATGTAGCGGTGAAATGCTT  
AGATATGACATAGAACACCAATTGCGAAGGCAGCTTGCTACACAACTATTGACTCTGATG  
CACGAAAGCGTGGGGATCATACAGGATTAGATACCCCCGTAGTCC

>Otu1867

CCAGCCTACGGGTTGCTGCAGTAAGGAATATTGGTCAATGGGCGAAAGCCTGAACCAGCC  
GTGCCGCGTGAAAGGATGAAGGCCCTCTGGGTTGTAAACTTCTTTTATTTGGGACGAAAAA  
AGGGAATTCTTTCCCGTCTGACGGTACCAGATGAATAAGCACCGGCTAACTCCGTGCCAG  
CAGCCGCGGTAATACGGAGGGTGCAAGCGTTATCCGGATTCCTGGGTTTAAAGGGTGCG

TAGGCGGGCAGGTAAGTCAGTGGTGAATCTTTGGGCTTAACCCGAAAACTGCCATTGAT  
ACTATCTGTCTTGAATATTGTGGAGGTGAGCAGAATATGTCATGTAGCGGTGAAATGCTT  
AGATATGACATAGAATACCCATTGCGAAGGCAGCTCACTACGCATATATTGACGCTGAGG  
CACGAAAGCGTGGGGATCAAACAGGATTAGATACCCGCGTAGTCC

>Otu1871

CCAGCCTACGGGGGGCAGCAGTGGGGAATATTGGACAATGGGGGAAACCTGATCCAGCG  
ATGCCGCGTGAGTGATGAAGGCCTTCGGGTGTAAAGCTCTTTTGTGAGGGACGATGATG  
ACGGTACCTGACGAATAAGCTCCGGCTAACTTCGTGCCAGCAGCCGCGGTAATACGAAGG  
GAGCTAGCGTTGTTTCGAATTACTGGGCGTAAAGGGCGTGTAGGCGGTACCATAAGTCAG  
ATGTGAAAGCCCTAGGCTTAACCTAGGAGGTGCATTTGATACTATGGAAGTAGAGATCGA  
GAGAGGAAAGTGGAATTACGAGTGTAGAGGTGAAATTCGTAGATATTCTGTAAGAACACCA  
GTGGCGAAGGCGACTTTCTGGCTCGATACTGACGCTAAGGCGCGAAAGCGTGGGGAGCAA  
ACAGGATTAGAAACCCCCGTAGTCC

>Otu1872

CCAGCCTACGGGAGGCACCAGTAGGGAATATTGCGCAATGGAGGAAACTCTGACGCAGCG  
ACGCCGCGTGGGTGATGAAGGCCTTCGGGTGCTAAAGCCCTGTGCGAAGGGACGAAAAAC  
GGTATGGCTAACATCCATACCGCTTGACGGTACCTTCAGAGGAAGCACCGGCTAACTACG  
TGCCAGCAGCCGCGGTAATACGTAGGGTGCAAGCGTTGTTTCGAATCATTGGGCGTAAAG  
CGCGTGTAGGCTGTTAATTAAGTCGGGTGTGAAATCCCTGGGCTCAGCCGAGGAAGTGCA  
TCCGAAACTAATTAGCTAGAGAATGGTAGAGGAAGGTGGAATTCCTAGTGTAGAGGTGAA  
ATTCGTAGATATTAGGAGGAATACCGGTGGCGAAGGCGGCCCTTCTGGACCATTCTGACG  
CTGAGACGCGAAAGCGTGGGGAGCAAACAGGATTAGAAACCCTAGTAGTCC

>Otu1877

CCAGCCTATGGGGGGCAGCAGTCGAGAATTTTCCGCAATGGGCGAAAGCCTGACGGAGCG  
ACGCCGCGTGTGGGAAGAAGGCCTTCGGGTGCTAAACCACTGTGCAAGGGGACGATAATG  
ACGGTACCCTTGGAGGAAGCCCCGGCTAACTACGTGCCAGCAGCCGCGGTAAGACGTAGG  
GGGCGAGCGTTATTTCGAATTATTGGGCGTAAAGCGCTCGTAGGCGGGATTGCAAGTCCG  
TGTTGAAAGACCTCGGCTCAACTGAGGGACCGGCTCGGATACTGTGATTCTTGAGGCAAT  
CAGAGGGTGATGGAATTCCTGGTGTAGCGGTGAAATGCGTAGATATCGGGAGGAACACCA  
GTGGCGAAGGCGATCACCTGGGGTTGTTCTGACGCTGAGGAGCGAAAGCTAGGGGAGCAA  
ACGGGATTAGAAACCCCCGTAGTCC

>Otu1880

TCAGCCTATGGGAGGCTGCAGTTAGGGAACTTTTCCAATGCGCGCAAGCGTGAGAAAGTG  
AGCCGGAGTGATACAGATATAATTTCTGTATCTTTTGTTCATTGCAAAAAGATGGACGAA  
TAAGGAGTGGGCAAGATCGGTGCCAGCCGCCGCGGTAATCCCGACGCTCCAAGTCGCAGC  
CACAATTATCGGGTCTAAAACATTCGTAGCTCGTTTGTAAAGTTCTTTGTGAAATCTGAA  
ATCTTAAGTTTCAGGCGTGCAAAGAATACTGGCAGACTTGAGACCGGAAGAAGCAAGAAG  
TATGATCAAGGTAGTGGTAAAATATGTTAATCTCGAGCAGACTAACAACAGCGAAGGCAT  
CTTGCTAGTACGGATCTGACAGTGAGGAATGAAGGCTAGGGGCGCAAAGTGGAATTAGATA  
CCCGCGTAGTCC

>Otu1881

CCAGCCTATGGGATGCACCAGTCGAGAATTTTTCTCAGTGGGCGAAAGCCTGACTATGCG  
ACGCCGCGTGAGGGATGAAGGATTTTCGGTTCGTAAACCTCTTTTGGCAGGGAAGAAAATG  
TTGCAGTTAATAGCTGCAAACTGACGGTACCTGCAGAATAAGCCACGGCTAACTCCGTG  
CCAGCAGCCGCGGTAATACGGAGGTGGCTAGCGTTACTCGGAATTATTGGGTGTAAAGGG  
CAAGTAGGCGGCTTGGAAGTGGGGGGTGAAATACTCCGGCTCAATCGGAGAACTGCCTT  
CCAACTACCAGGCTTGAGCGTGACAGAGGAAAATGGAATTCTCGGTGTAAGGGTGAAAT  
CTGTAGATATCGAGAAGAACACCAGCGGCGAAGGCGATTTTCTGGGTCACTACTGACGCT  
AAATTGCGAAAGCTAGGGGAGCAAACAGGATTAGAAACCCCAGTAGTCC

>Otu1885

CAGCCTATGGGTTGCAGCAGTGGGGAATCTTGCACAATGGGGGAAACCTGATGCAGCGA  
CGCCGCGTGAGCGATGAAGCCCTTCGGGGTGTAAGCTCTTTCGACGGGAACGATAATGA  
CGGTACCCGAAGAAGAAGCTGCGGCTAACTACGTGCCAGCAGCCGCGGTAATACGTAGGC  
AGCAAGCGTTGTTTCGAATTACTGGGCGTAAAGAGTGCGTAGGCGGTGTTCTAAGTCTGT  
TGTGAAATCTCCTGGCTCAACTGGGAGGGTGCGCCGAATACTGAGAGGCTAGAGTGTGGG  
AGAGGAAAGTGGAATTCCTGGTGTAGCGGTGAAATGCGTAGATATCAGGAGGAACACCGG  
TGGTGTAAACGGCTTTCTGGACCATAACTGACGCTGAGGCACGAAAGCGTGGGTAGCAAA  
CAGGATTAGAAACCTTGTAGTCC

>Otu1887

CCAGCCTACGGGTGGCTGCAGTCGAGAATATTCGACAATGGGCGAAAGCCTGATCGAGCG  
ACGCCGCGTGCAGGATGAAGGCCTTCGGGTCGTAAACTGCGGTAGCTAGGTAACAATTTA  
TGAGTGCTTAGCGGAAAGAGGTGGGTAACCTACGTGCCAGCACCAGCGGTAATACGTAGAC  
CTCAAGCGTTATCCGGATTTATTTGGGCGTAAAGCGCGTGTAGGTGGTTTTGTGCGTCCCT  
GGTTAAAGCCACCGCCTAACGGTGGAAGTGCCAGAGATACGACAAGACTAGAGGAGGTT  
AGAGGCAAGCAGAACGCACGGTGTAGGGGTGAAATCCGTTGATATCGTGCGGAATACCAA  
AGGCGAAGGCAGCTTGCTGGGACTTTCCTGACACTGAGACGCGAAAGCGTGGGGAGCAAA  
AAAGATTAGATACCCCCGGTAGTCC

>Otu1889

CCAGCCTACGGGTGGCAGCAGTAGGGAATATTGCTTAATGTGCGAAAGCGCGAAGCAGCA  
ACGCCGCGTGTGTGATGAAGGCCTTCGGGTCGTAAACACTTTTTTTGAAGGATGAGGAAG  
GACAGTACTTCAAGAATAAGCCTCGGCTAACTACGTGCCAGCAGCCGCGGTAACACGTAG  
GAGGCGAGCGTTATCCGGATTTACTGGGCGTAAAGCGCGTGTAGGCGGTTCCGGTAAGTTG  
GATGTGAAAGCTCCCGGCTTAACCTGGGAGAGGTCGTTCAATACTACCGGACTTGAGAGTG  
GTAGAGGAAGGTGGAATTCCGCGTGTAGTGGTGAAATGCGTAGATATGCGGAGGAACACC  
AGTGCGCAAAGCGGCCTTCTGGCCCACTTCTGACGCTCAGACGCGAAAGCTAGGGGAGCA  
AACGGGATTAGAAACCCCTGTAGTCC

>Otu1890

CCAGCCTATGGGTGGCTGCAGTGGGGAATCTTGCGCAATGGACGAAAGTCTGACGCAGCC  
ACGCCGCGTGAGTGAAGACGGCCTTCGGGTTGTAAAGCTCTGTGAGCGGGACGGAAAAG  
CGGAGGGTTAACAGCCCTTCGAATTGACGGTACCGCTAAAGGAAGCACC GGCTAACTCCG  
TGCCAGCAGCCGCGGTAATACGGAGGGTGCAAGCGTTGCTCGGAATTATTGGGCGTAAAG  
GGTAGGTAGGTGGTCTCATTTGTCAGGGGTGAAAACCTTGGGCTTAACCCAAGAAGTGCC  
CCTGAAACGGTGGGACTGGAGTCCTGGAGAGGGTTCGTGGAATTCCCGGTGTAGCGGTGAA  
ATGCGTAGAGATCGGGAGGAACACCAGCGGCGAAGGCGGCGACCTGGACAGGTACTGACA  
CTCAACTACGAAAGCGTGGGGAGCAAACAGGATTAGAGACCCGCGTAGTCC

>Otu1891

CCAGCCTACGGGTGGCACCAGTGGGGAATATTGGGCAATGGGCGAAAGCCTGACCCAGCG  
ACGCCGCGTGGGTGATGAAGGCCTTCGGGTTGTAAAGCCCTTTCGTGTGGAAAGAACAGT  
CCTGCGGCTAATACTCGCAGGATTTGACGGTACCACAGGAAGAAGCACC GGCTAACTCCG  
TGCCAGCAGCCGCGGTAATACGGAGGGTGCGAGCGTTGTTTCGGAATTACTGGGCGTAAAG  
GGCGCGTAGGCGGTTGTGATAGTCAGGTGTGAAATCCTTCGGCTTAACCGGAGA ACTGCA  
TCTGAAACTTCACA ACTAGAGTACAGGAGAGGGGAAACGGAATTCCCGGTGTAGAGGTGAA  
ATTCGTAGATATCGGGAGGAACACCAGTGGCGAAGGCGGTTTCCTGGCCTGATACTGACG  
CTGAGGCGCGAAAGCGTGGGGAGCAAACAGGATTAGAAACCCTCGTAGTCC

>Otu1893

CCAGCCTATGGGGCGCTGCAGAGGAGAATCATTCGCAATGGGCGAAAGCCTGACGGTGCG  
ACGCCGCGTGAGGGATGAAGGCCTTCGGGTTGTAAACCTCTGTGAGGAGTTATGAACGGC  
GAGGGCGCCAATATCGCCTTCGCGTGACAAAGGCTCCAAAGGAAGCTCCGGCTAACTACG  
TGCCAGCAGCCGCGGTAATACGTAGGGAGCGAGCGTTACTCGGAATCACTGGGCATAAAG  
GGCGTGTAGGCGGGTGCGCAAGTCCGTCGTGAAATCCCTCGGCTCAACTGGGGAATTGCG  
GCGGATACTGCGTGTCTTGAGTGTGGGAGGGGAGAGTGGA ACTCTTGTTGGTGGAGCGGTGAA  
ATGCGTAGATATCAAGAGGAACGCCGGTGGCGAAAGCGGCTCTCTGGCCCACTTCTGACG  
CTGAGGCGCGAAAGCTAGGGGAGCAAACAGGATTAGAAACCCGCTAGTCC

>Otu1895

CCAGCCTATGGGTGGCTGCAGTAGGGAATATTGGTTAATGGGCGAAAGCCTGACCCAGCA  
ACGCCGCGTGAGTGATGAAGGCCTTCGGGTTGTAAACTCTTTTTATGGGGATGAGGAAG  
GACAGTACCCATAGAATAAGTCTCGGCTAACTACGTGCCAGCAGCCGCGGTAACACGTAG  
GAGACGAGCGTTATCCGGATTTACTGGGTGTAAAGCGCGTGCAGGCGGTCCGATAAGTTG  
GATGTGAAAGCTCCTGGCTTAACCTGGGAGAGGTCGTTCAATACTGTTGGACTAGAGGATG  
TCAGAGGGGAGTGGAATTCCGAGTGTAGCGGTAAAATGCATAGATATTCGGAAGAACACC  
AGTGCGCAAGGCGGCTCTCTGGGGCATATCTGACGCTCAGACGCGAAAGCTAGGGTAGCA  
AACGGGATTAGAAACCCCGGTAGTCC

>Otu1896

CCAGCCTATGGGATGCAGCAGTAACGAATCTTCCGCAATGCACGAAAGTGTGACGGAGCG  
ACGCCGCGTGTGGGATGAAGTCCTTCGGGATGTAAACCACTGTCAGGGGAAAGAAAGTTC  
TGATCTACCCAGAGGAAGAGACGGCTAACTCTGTGCCAGCAGCCGCGGTAATACAGAGG



TCTCGAGCGTTAGGCGGAATCACTGGGCTTAAAGCGTGTGTAGGCGGCGTGCTAAGTACC  
TTGTGAAATCCCACAGCTCAACTGTGGAAGTCTTGGTATACTGGTTTCGCTTGAGCAACA  
TAGGGGCTACCGGAACAAATGGTGGAGCGGTGAAATGCGTAGATATCATTTGGAACGCCA  
ATGGTGAACACAGGTAGCTGGGTGTTTGCTGACGCTGAGACACGAAAGCCAGGGGAGCAA  
ACGGGATTAGATACCCGCGTAGTCC

>Otu1897

CCAGCCTATGGGTTGCACCAGGCGCGAAAAATTCGCAATGCGCGAAAGTGTGACGGGGGA  
ATTCTGAGTGTTCTCTTACGAGGAACCTTTGCCAAGATTGAATCTCTTGAGAAATAAGG  
GGTGGGTAAATCCTGTGCCAGCCGCCGCGGTAATACAGGTAGCCCGAGTGGTATCCACGA  
ATATTGAGCCTAAAGCGCTCGTAGCCGGTTTTGCAAGTCTTCTGTGAAATCCTCTGGCTC  
AACCAGAGGGCGTGCAGGAGATACTACAAGGCTTGGGAGTGGGGGAGGTAAGTGGTACGT  
TAGGGGGAGGGGTAAATCCTGTAATCCTTAACGGACCTTCAGTAGCGAAAGCGAGTTAC  
CAAAACACGTCCGACGGTGAGGGGCGAAGGCTAGGGGAGCAAATCGGATTAGATACCCCA  
GTAGTCC

>Otu1898

CCAGCCTATGGGAGGCAGCAGCAAGGAATTTTCGTCAATGGGCGCAAGCCTGAACGAGCA  
ACGCCGCGTGCGGGATGACGGCCTTCGGGTTGTAAACCGCTTTTGCGGGGGACGATAATG  
ACGGTACCCCGCGAACAAGCCCCGGCTAACTCTGTGCCAGCAGCCGCGGTAAGACAGAGG  
GGGCAAGCGTTGTCCGGAATTACTGGGCGTACAGCGCACGCAGGTGGCCAAGCAAGTGTT  
GTGTGAAAGCCCCGCGCTTAACGCGGGGAGGCCAGAGCAGACTGCTTGGCTCGAGGGGTG  
CAGAGGGTTCGTGGAATTGCCGGTGTAGTGGTGAAATGCGTAGAGATCGGCAGGAACACCA  
AGGACGAAGGTAGCGACCTGGGCACTCACTGACACTCATGTGCGACAGCGTGGGGAGCAA  
ACCGGATTAGAAACCCCGGTAGTCC

>Otu1903

CCAGCCTATGGGTGGCACCAGTCGAGAATTTTTCACAATGGTCGCAAGACTGATGGAGCG  
ACGCCGCGTGAGGATGAAGGTTTTTCGGATTGTAAACTCCTGTCACTACAGAACAAGGGT  
ATTTAGGTTAAACAACCTAGGTATTTGATGGTATGTGGAGAGGAAGGGACGGCTAACTCTG  
AGCCAGCAGCCGCGGTAATACAGAGGTCCCGAGCGTTGTTTCGGATTCAATTGGGCGTAAAG  
GGTGTGTAGGAGGTCGGGTTAGTCAGGTGTGAAATCTCGGAGCTTAACTCTGAAACTGCG  
CTTGATACTGCTCGGCTAGAGGATCGGAGGGGGTACTGGAATATATGGTGTAGCAGTGAA  
ATGCGTAGATATCATATGGAACACCGGTGGCGTAGGCGGGTACCTGGAAGATTCTTGACT  
CTGAAACACGAAAGCTAGGGGAGCAAACGGGATTAGAAACCCCGTAGTCC

>Otu1907

CCAGCTTATGGGGCGCTGCAGTAAGGAATATTGGACAATGGGGGCAACCCTGATCCAGCC  
ATGCCGCGTGAGTGATGAAGGCCTTCGGGTTGTAAACTCTTTTAGATGTGAAGATGATG  
ACGGTAGCATCAGAAAAGCTCCGGCTAACTTCGTGCCAGCAGCCGCGGTAATACGAAGG  
GAGCGAGCGTTGTTCCGAATCACTGGGCTTAAAGCGTGCGTAGGCGGATTTGTAAGTAAG  
AAGTGAAAGCCCAGGGCTCAACCCTGGAAGTCTTTTTAGACTGCAAGTCTTGAATTCGG  
TAGAGGTTAGTGGAATATCCAGTGTAGAGGTGAAATTCGCAGATATTGGATGGAACATCA  
GTGGCGAAGGCGACTAACTGGACCGATATTGACGCTGAGGTACGAAAGCGTGGGTAGCAA  
ACAGGATTAGATACCCCGTAGTCC

>Otu1908

CCAGCCTATGGGTTGCACCAGTAACGAATCTTCCGCAATGCACGAAAGTGTGACGGAGCG  
ACGCCGCGTGAGGAGAGAAGTTCTTCGGAATGTAAACTCCTGTGATGAGAAAGAAAGTTCT  
GATCTACTCAAGAGGAAGGGACGGCTAACTCTGTGCCAGCAGCCGCGGTAAGACAGAGGT  
CCCGAGCGTTAGGCGGAATCACTGGGCTTAAAGCGTGTGTAGGCGGATCTGTAAGTACCT  
TGTGAAATCCCACGGCTTAACCGTGGAAGTCTTGGTATACTGCGGATCTTGAGGTACTT  
AGGGGCAACTGGAACAAATGGTGGAGCGGTGAAATGCGTAGATATCATTTGGGACGCCAA  
TGGTGAAACAAAGTTGCTGGGAGTATTCTGACGCTGAGACACGAAAGCCAGGGGAGCAAA  
CGGGATTAGAAACCCTCGTAGTCC

>Otu1909

CCAGCCTACGGGGGGCAGCAGTGGGGAATCTTGCGCAATGGGCGAAAGCCTGATGGAGCA  
ACACCGCGTGAGGATGACGGCCTTCGGGTTGTAAACTGCTTTTATATGGGAAGATTATG  
ACGGTACCATATGAATAAGGACCGGCTAACTACGTGCCAGCAGCCGCGGTAATACGTAGG  
GTCCAAGCGTTATCCGGAATTACTGGGCGTAAAGCGTGCGCAGGCGGCTCGTTAAGTGAG  
ATGTGAAATCTGATGGCTCAACCGTTAGACTGTATCTCATACTGGCGAGCTAGAGGATGG  
CAGAGGCAAGTGGAATTCGTAGTGTAGCAGTGAAATGCGTAGATATTACGAGGAACACCA  
ATGGCGAAGGCAGCTTGCTGGGCTATTTCTGACGCTCAGGCACGAAAGCGTGGGGAGCGA

ACAGGATTAGATACCCTCGTAGTCC

>Otu1912

CCAGCCTATGGGACGCAGCAGTGGGGAATATTGGACAATGGGCGCAAGCCTGATCCAGCA  
ATACCGCGTGTGTGAAGAAGGCCTTAGGGTTGTAAAGCACTTTCAATAAGGAGGAAAACC  
TGCCGGTCAATACCCGGCAGCTTGACATTACCTTTAGAAGAAGCACCGGCTAACTCCGTG  
CCAGCAGCCGCGGTAATACGGAGGGTGCAAGCGTTAATCGGAATTACTGGGCGTAAAGCG  
TGCGTAGGCGGTTTCGTTAAGTCAGATGTGAAAGCCCCGGGCTTAACCTGGGAACGGCATT  
TGAAACTGGCGAACTCGAGTTGAGTAGAGGGGAGTGGAATTTTCAGGTGTAGCGGTGAAAT  
GCGTAGATATCTGAAGGAACACCAGTGGCGAAGGCGACTCCCTGGACTCAAACCTGACGCT  
GAGGTACGAAAGCGTGGGTAGCAAACAGGATTAGATACCCCCGTAGTCC

>Otu1916

CCAGCCTATGGGGTGCAGCAGTCGAGAATTTTTTCACAATGGACGAAAGTCTGATGGAGCG  
ACGCCGCGTGGAGGATGAAGGTTTTTCGGATTGTAAACTCCTGTCACTGCAGAACAAGGTC  
AGGCGATTGAACATTTTCGTCTGGTTGATGGTATGCGGAGAGGAAGGGACGGCTAACTCTG  
TGCCAGCAGCCGCGGTAAGACAGAGGTCCCGAGCGTTGTTTCGGATTCACTGGGCGTAAAG  
GGTGCCTAGGCGGTTCGGGTAAGTCTGACGTGAAATCTCCGGGCCTAACCCGGAACCTGCG  
TCGGATACTATCCGGCTAGAGGATTGGAAGGGGAGACTGGAATACTTGGTGTAGCAGTGAA  
ATGCGTAGATATCAAGTGGAACACCAGTGGCGAAGGCGAGTCTCTGGACAATTCCTGACG  
CTGAGGCACGAAAGCCAGGGGAGCAAACGGGATTAGATACCCCTGTAGTCC

>Otu1918

CTAGCCTATGGGTGGCAGCAGTGGGGAATATTGGGCAATGGGCGAAAGCCTGACCCAGCG  
ACGCCGCGTGGGTGATGAAGGCCTTCGGGTTGTAAAGCCCTGTCAGGTGGAACGAAGGGC  
TCAGAGACGAATAATCTTTGAGCTTTGACGGTACCACCGGAGGAAGCACCGGCTAACTCC  
GTGCCAGCAGCCGCGGTAATACGGAGGGTGCAAGCGTTGTTTCGGAATTACTGGGCGTAAA  
GGGCGCGTAGGTGGTTGTGTAAAGTCAGATGTGAAATCCTGAGGCTCAACCTCAGAACTGC  
ATCTGATACTGCATTGACTAGAGTGCAGCAGAGGGAAACGGAATTCCCGGTGTAGAGGTG  
AAATTCGTAGATATCGGGAGGAACACCGGTGGCGAAGGCGGTTTCCTGGGCTGACACTGA  
CACTGAGGCGCGAAAGCGTGGGTAGCAAACAGGATTAGAACCCCCGTAGTCC

>Otu1921

CCAGCCTACGGGAGGCAGCAGTGGGGAATATTGGACAATGGGCGCAAGCCTGATCCAGCC  
ATGCCGCGTGAGTGAAGAAGGCCTTAGGGTTGTAAAGCTCTTTTGGCGGGGACGATAATG  
ACGGTACCCGCGAGAAGAAGCCCCGGCTAACTTCGTGCCAGCAGCCGCGGTAATACGAAGG  
GGGCTAGCGTTGCTCGGAATGACTGGGCGTAAAGGGCGCGTAGGCGGATGATACAGTCAG  
ATGTGAAATTCCTGGGCTTAACATGGGGGCTGCATTTGAGACGTGTTGTCTAGAGTGAGG  
AAGAGGGTTGTGGAATTCACAGTGTAGAGGTGAAATTCGTAGATATTGGGAAGAACACCG  
GTGGCGAAGGCGGCAACCTGGTCCTTGACTGACGCTGAGGCGCGAAAGCGTGGGGAGCGA  
ACAGGATTAGAAACCCTTGTAGTCC

>Otu1924

CCAGCCTATGGGTGGCAGCAGCTAAGAATCTTCCGCAATGGGCGAAAGCCTGACGGAGCG  
ATGCCGCGTGATCGATGAAGGTCGAGAGATTGTAAAGATCTTTTACAGCTGAGGAATAAG  
GGTGGGAGGGAATGCCCGCCTGATGACGTTAAGCTGTGAATAAGCCCCGGCTAATTACGT  
GCCAGCAGCCGCGGTAACACGTAAGGGGCGAGCGTTGTTTCGGAATTATTGGGCGTAAAGG  
GCACGCAGGCGGTTATGCAAGTCTGATGTGAAATCTCCGGGCTTAACCTCGGAATCCGCGT  
TGAAACTGCATGACTAGAGTATTAGAGGGGGAGTCGGAATTCCTAGTGTAGGGGTGAAA  
TCTGTTGATATTAGGAAGAACACCGGTGGCGAAGGCGGACTCCTGGCTGAATACTGACGC  
TGAGGTGCGAAAGCATAGGGAGCAAACAGGATTAGATACCCGTGTAGTCC

>Otu1925

CCAGCCTATGGGATGCACCAGTGGGGAATTTTACGCAATGGGCGAAAGCCTGACGTAGCG  
ACACCGCGTGAGTGAAGAAGCCCTTTGGGGTGTAAAGCTCTGTTCGGCTGGAACGAACACA  
ATGACGGTACCAGCAAAGGAAGCATCGGCTAACTACGTGCCAGCAGCCGCGGTAAGACGT  
AGGATGCAAGCGTTGCCCGGATTTATTGGGCGTAAAGAGTTCGTAGGCGGTTTGTAAAGT  
CTGGTGTAAAGACCGGGGCTCAACCTCGGAAATGCATTGGATACTGGCAGACTGGAGTG  
TGGTAGAGGCGAGTGGAATTCACAGTGTAGCGGTGAAATGCGTAGATATTGGGAAGAACA  
CCAGTGGCGTAGGCGACTCGCTGGGCCATAACTGACGCTGAGGAACGAAAGCCAGGGGAG  
CGAATGGGATTAGAAACCCGAGTAGTCC

>Otu1927

CCAGCCTACGGGTGGCAGCAGTCGAGAATTTTTTCACAATGGGCGAAAGCCTGATGGAGCG  
ACGCCGCGTGGGGGATGAATGGCTTCGGCCCGTAAACCCCTGTCATTTCGGGATCAATGCG

TACTGCCTAATAAGCGGCGCGTTGATAGTACCGGAAGAGGAAGGGACGGCTAACTCTGTG  
CCAGCAGCCGCGGTAATACAGAGGTCCCAAGCGTTGTTTCGGATTCACTGGGCGTAAAGGG  
TGCGTAGGTGGTTCGGGTAAGTTTGTATGTGAAATCTCCGGGCCTAACCCGGAAATGGCATT  
GAATACTACTCGGCTGGAGGGTTGGAGGGGGGACTGGAATTCTCGGTGTAGCAGTGAAAT  
GCGTAGATATCGAGAGGAACACCAGTGGCGAAGGCGAGTCCCTGGACAACCTCTGACACT  
AAGGCACGAAAGCTAGGGGAGCAAACAGGATTAGATACCCCCGTAGTCC

>Otu1929

CCAGCCTACGGGGTGCACCAGCAACGAATCTTCCCCAATGGGCGAAAGCCTGAGGGAGCG  
ACGCCGCGTGAAAGGACGAAGTACTTCGGTATGTAGACTTCTGTTAGGGTTATGAAAGTAA  
AAGGGGCTAATACCCTCTTAATTGATCTAGCCCAAAGAAAGGGACGGCTAACTCTGTGCC  
AGCAGCCGCGGTAATACAGAGGTCCCAAGCGTTACTGAGAATCACTGGGTTTAAAGGGTG  
CGTAGGTGGTCCGTTAAGTCAGTTGTGAAATCCCCGGGCTCAACCCGGGAAGTCTTCTG  
ATACTGGCGGACTTGAGGCCAGTAGGGGTCACTAGAACTGACGGTGGAGCGGTGAAATGC  
GTAGATATCGTCAGGAATGCCGGTGGTGAAGACGGGTGACTGGGCTGGTTCTGACACTGA  
GGCACGAAAGCGTGGGGAGCGAACGGGATTAGAGACCCCAGTAGTCC

>Otu1931

CCAGCCTATGGGGTGCACCAGTGGGGAATATTGGACAATGGGCGAAAGCCTGATCCAGCA  
ATGCCGCGTGAGTGATGAAGGCCTTAGGGTTGTAAAGCTCTTTTACCAGGGATGATAATG  
ACAGTACCTGGAGAATAAGCTCCGGCTAACTCCGTGCCAGCAGCCGCGGTAATACGGAGG  
GAGCTAGCGTTGTTCCGAATTACTGGGCGTAAAGCGCACGTAGGCGGTACATCAAGTCAG  
GGGTGAAAGCCCGGAGCTCAACTCCGGAAGTCCCTTGAAACTAGTGTGCTAGAATCTTG  
GAGAGGCGGGTGGAATTCGAGTGTAGAGGTGAAATTCGTAGATATTTCGGAAGAACACCA  
GTGGCGAAGGCGCCCCGCTGGACAAGTATTGACGCTGAGGTGCGAAAGCGTGGGGAGCAA  
ACAGGATTAGATACCCCTGTAGTC

>Otu1932

CCAGCCTACGGGGGGCAGCAGTCGAGAATACTCCACAATGGACGAAAGTCTGATGGAGCG  
ACGCCGCGTGCGGGAAGAAGGCCTTCGGGTGCTAAACCGCTTTTATAAGGGAAGAATGTA  
ATGACGGTACCTTATGAATAAGAGGTTACTAACTCTGTGCCAGCAGTAGCGGTAATACAG  
AGACCTCAAGCGTTATCCGGATTTATTGGGCGTAAAGGGCGCGTAGGCGGATATATTAGT  
CAGACGTCAAATCTCCGAGCTTAACTCGGAAACTGCGTTTGAAACGGTATATCTTGAGGA  
AGTGGGAGACCAGTGGAACATATGGTGTAGCAGTGAAATGCGTTGATATCATATGGAACA  
CCAAAGGCGAAGGCATCTGGTTGGCACTTTCTGACGCTGAGGCGCGAAAGCGTGGGTAG  
CGAATGGGATTAGAAACCCAGTAGTCC

>Otu1935

CCAGCCTACGGGTGGCACCAGTCGAGGATCTTCAGCAATGGGCGCAAGCCTGACCGAGCG  
ACGCCGCGTGTCGAAGAAGGCCTTCGGGTGTAAAGCACTGTGAGGGGGAGAAAAGCC  
GTAAGGTCTGATCTATCCCTGAAGGAAGCACGGGCTAAGTTCGTGCCAGCAGCCGCGGTA  
AGACGAACCGTGCGAACGTTGTTCCGAATCACTGGGCTTAAAGGGCGCGTAGGCGGGTGA  
TCAAGTCAGGGGTGAAATCTTTCGGCTTAAACGGAAAACAGCCTCTGATACTGGTCATCT  
CGAGGGAGGTAGGGGCATGTGGAACCTCCGGTGGAGCGGTGAAATGCGTAGATATCGGAA  
GGAACGCCGGTGGCGAAAGCGACGTGCTGGACCTTTTCTGACGCTGAGGCGCGAAAGCTA  
GGGGAGCAAACGGGATTAGATACCCGAGTAGTCC

>Otu1937

CCAGCCTACGGGTGGCTGCAGCCGAGAATATTGCACAATGGGCGAAAGCCTGATCGAGCG  
ATACCGCGTGGTGGATGAAGCGCTTCGGCGCGTAAACACCTTTTATGAGGGAGGAAGTTA  
TTGACGTTACCTCATGAATAAGGGGCTCCTAGCTCTGTGCCAGCAGGAGCGGTAATACAG  
AGGCCCCAAGCGTTACCCGGAATTACTGGGCGTAAAGAGTGCGTAGGTGGTCGTGTAGT  
CGTCTGTAAACCCCGGAGCTCAACTCCGGATCTGCAGACGAAACGGCACGACTCGAGGG  
CGTGAGAGGTGCATAGAACTCTAGGTGTAGGGGTGAAATCCGTTGATATCTAGGGGAATA  
CCGAAAGCGAAGGCAGTGCACGTGGCGCGTTCTGACACTCAAGCACGAAAGCGTGGGTAG  
CGAACGGGATTAGAAACCCCTCGTAGTCC

>Otu1944

CCAGCCTACGGGATGCAGCAGTGGGGAATTTTGGACAATGGGGGCAACCCTGATCCAGCC  
ATTCCGCGTGTCTGAAGAAGGCCTTCGGGTGTGAAGGACTTTTGTCCGGGAGCAAAGCC  
TGCTGGTTAATAACCGGCGGGGATGAGAGTACCGGAAGAATAAGCACCGGCTAACTACGT  
GCCAGCAGCCGCGGTAATACGTAGGGTGCAGAGCGTTAATCGGAATTACTGGGCGTAAAGC  
GTGCGCAGGCGGTATTGCAAGTCTGATGTGAAAGCCCCGGGCTTAACCTGGGAACGGCAT  
TGGAACCTGCAAACTAGAGTACGTGAGAGGGGGGTAGAATTCACGCTGTAGCAGTGAAA

TGCGTAGAGATGTGGAGGAATACCGATGGCGAAGGCAGCCCCCTGGGATGATACTGACGC  
TCATGCACGAAAGCGTGGGGAGCAAACAGGATTAGATAACCCCGTAGTCC  
>Otu1945  
CCAGCCTATGGGTCGCTGCAGTCGAGGATCTTCGGCAATGGGCGCAAGCCTGACCGAGCG  
ACGCCGCGTGAGCGATGAAGGCCTTCGGGTGTAAAGCTCTTTAGTGGGGGAGAAAAGCG  
CAAGCTTGATCTATCCCAAGAATAAGCACGGGCTAAGTTCGTGCCAGCAGCCGCGGTAAAG  
ACGAACCGTGCGAACGTTGTTTCGGAATCACTGGGCTTAATGGGCGCGTAGGCGGCTTGTC  
AAGTCCGGGGTGAAAGCCTCCAGCTTAACTGGAGAAGTGCCTTGGATACTGGCGAGCTCG  
AGGGAGGTAGGGGAGATGGAACCTCCGGTGGAGCGGTGAAATGCGTTGATATCGGAAGG  
AACGCCGTTGGCGAAAGCGATCTGCTGGACCTCTTCTGACGCTGAGGCGCGAAAGCTAGG  
GGAGAGAACGGGATTAGAAACCCCTTGTAGTCC  
>Otu1948  
CCAGCCTACGGGACGCTGCAGTAGGGAATTTTGGACAATGGGGGAAACCCTGATCCAGCC  
ATGCCGCGTGAGTGAAGAAGGCCTTCGGGTGTAAAGCTCTTTTGGTGGGAAGAAAAGGA  
CTCCTTCTAATACAGGGGGTTTTTGACGGTACCGGCAGAATAAGCACCGGCTAACTACGT  
GCCAGCAGCCGCGTAATACGTAGGGTGCAGCGTTAATCGGAATTACTGGGCGTAAAGA  
GTGCGTAGGCGGTTTCGTTATGTCTGCTGTGAAAGCCCTGGGCTTAACCCGGGAAGTGCAG  
TGAAACTGGCGGGCTTGAGTATGGCAGAGGGGGTGGAATTCGCGGTAGCAGTGAAA  
TGCGTAGAGATGCGGAGGAACACCGATGGCGAAGGCAGCCCCCTGGGCTACTACTGACGC  
TGAGGCACGAAAGCGTGGGGAGCAAACAGGATTAGAAACCCCTCGTAGTCC  
>Otu1949  
CCAGCCTATGGGAGGCTGCAGTAGGGAATATTGCGCAATGGGCGAAAGCCTGACGCAGCA  
ATTCCGCGTGAGGATGAAGTTTCTTGGAATGTAACTCCTTTTCGGTGGTGACGATAATG  
ACGGTAGCCACAGAAGAAGCACCGGCTAACTACGTGCCAGCAGCCGCGGTAAAGACGTAGG  
GTGCAAGCGTTGTCCGATTTATTGGGCGTAAAGAGTTTCGTAGGCGGTTTGCCAAGTCTG  
TTGTTAAAGGCCTGAGCTCAACTCGGGTACGGCATCGGAAACTGGCAGGCTAGAGTGTGG  
TAGAGGCAAGGGGAATTCCTCGGTGTAGCGGTGAAATGCGTAGATGTCTGGGAGGAACACCA  
GTGGCGAAAGCGCCTTGCTGGCCCACTACTGACGCTGAGGAACGAAAGCCAGGGTAGCGA  
AAGGGATTAGAGACCCCGTAGTCC  
>Otu1950  
CCAGCCTATGGGTGGCAGCAGTCGAGAATTCTTCACAATGGGCGAAAGCCTGATGGAGCG  
ACGCCGCGTGGGGGATGAATGGCTTCGGCCCGTAAACCCCTGTCAATTTGCGAACAAACGC  
CATTATTTAAAGATGATGGCTTGATTGTAGCGAAAGAGGAAGGGACGGCTAACTCTGTG  
CCAGCAGCCGCGTAATACAGAGGTCCCAAGCGTTGTTTCGGAATTACTGGGCGTAAAGGG  
TGCGTAGGTGGTGGGGTAAGTCTGATGTGAAATCTCCGAGCTCAACTCGGAAATGGCATT  
GGAAACTACCCCGCTCGAGGATTGGAGGGGGGACTGGAATTCTCGGTGTAGCAGTGAAAT  
GCGTAGATATCGAGAGGAACACCAGTGGCGAAGGCAGTCCCTGGACAATACCTGACACT  
GAGGCACGAAAGCTAGGGGAGCAAACAGGATTAGAAACCCCGTAGTCC  
>Otu1952  
CCAGCCTACGGGGGGCAGCAGTCGCGAATCATTCACAATGGGCGCAAGCCTGATGATGCC  
ACGCCGCGTGCGGGATGAAGGCCCTCTGGGTGTAAACCGCTGTCAAGGGAGGGGAAACG  
TATGGTGTAAACAGCGCCATGCTTGACTGCTCCCTAAAGGAAGCCCCGGCAAACATGTG  
CCAGCAGCCGCGTAATACATGTGGGGCAAGCGTTGTTTCGGAATTACTGGGCATAAAGGG  
TGCGTAGGTGGCTTGTTAAGTCACGGGTGAAAGTTTTTCGGCCCAACCGGAAATGGCCTG  
CGATACTGGCGAGCTTGAGTGCCTGAGGGGTAAACCGGAACGAGCAGTGTAGCGGTGAAAT  
GCGTAGATATTGCTCGGAAGGCCAGAGGCGAAGGCGGGTTACTGGTACGCAACTGACACT  
GAGGCACGAAAGCGTGGGGAGCAAACAGGATTAGATAACCCGTGTAGTCC  
>Otu1953  
CCAGCCTACGGGAGGCACCAAGTAGGGAATCTTTCGCAATGGGCGAAAGCCTGACGCAGCA  
ACGCCGCGTGAGGGACGAAGGCTTTCTGAGTTGTAAACCTCTTTCAGCAGGGACGATTGT  
GACGGTACCTGCAGAAGAAGCACCGGCCAACTACGTGCCAGCAGCCGCGGTGATACGTAG  
GGTGAAGCGTTGTCCGATTTATTGGGCGTAAAGAGCTCGTAGGCGGTTTCGATAAGTTCG  
GGTGTGAAATCTCCAGGCTCAACCTGGAGTCGCCACTTGATACTGTCTGTGACTAGAGTCC  
GGTAGGGGACCATGGAATTCCTGGTGTAGCGGTGAAATGCGCAGATATCAGGAGGAATAC  
CAGTAGCGAAGGCGGTGGTCTGGGCCGGAAGTACGCTGAGGAGCGAAAGCGTGGGGAGC  
GAACAGGATTAGAAACCCCAAGTAGTCC  
>Otu1954  
CCAGCCTATGGGGCGCTGCAGTGAGGAATATTGGTCAATGGGCGGAAGCCTGAACCAGCC

ATGCCGCGTGCAGGAAGACGGCCCTACGGGTTGTAAACTGCTTTTCCGGGGGAAGAATAA  
GGGCGATGCGTCGTCCGATGCCGGTACCCCGGGAATAAGGATCGGCTAACTCCGTGCCAG  
CAGCCGCGGTAATACGGAGGATCCGAGCGTTATCCGGATTTACTGGGTTTAAAGGGTGCG  
TAGGCCGGGCGCTTAAGTCAGCGGTGAAATACGGGGGATCAACCTTCGAACGGCCGTTGAT  
ACTGGGCGCCTTGGATTTCGGTCGAGGCGGGCGGAATGCGACATGTAGCGGTGAAATGCTT  
AGATATGTCGCAGAACCGCGATTGCGAAGGCAGCTCGCCAGGCCGACATTGACGCTGAGG  
CACGAAAGCGTGGGGATCGAACAGGATTAGATACCCGCGTAGTCC

>Otu1956

CCAGCCTATGGGAGGCACCAGTAGGGAATATTGCACAATGGGCGCAAGCCTGATGCAGCA  
ACGCCGCGTGCAGCATGAAGGCCTTCGGGTTGTAAAGCGCTTTTTCGGGGAGATGAGGAAG  
GACAGTATCCCCGGAATAAGTCTCGGCTAACTACGTGCCAGCAGCCGCGGTAAAACGTAG  
GAGGCGAGCGTTATCCGAATTTACTGGGCGTAAAGCGTGTGCAGGCGGTTTCGGTAAGTTG  
GATGTGAAATCTCCTGGCTCAACTGGGAGAGGTCGTTCAAGACTGTCGGACTAGAGGGCG  
GTAGAGGGAGGTGGAATTCCCGGTGTAGTGGTGAATGCGTAGATATCGGGAGGAACACC  
TGTGGCGAAAGCGGCCTCCTGGACCGTACCTGACGCTCAGACACGAAAGCTAGGGTAGCA  
AACGGGATTAGAAACCCGCGTAGTCC

>Otu1960

CCAGCCTATGGGTGGCAGCAGTCGAGAATTTTCCACAATGGGGGCAACCCTGATGGAGCA  
ACGCCGCGTGCAGGATGAATGCCTTCGGGTTGTAAACTGCTTTTATCTGTGACGATTTTG  
ACGGTAGCAGATGAATAAGGATCGGCTAACTCCGTGCCAGCAGCCGCGGTCATACGGAGG  
ATCCAAGCGTTATCCGGAATTACTGGGCGTAAAGAGTTGCGTAGGTGGCATTGTAAGCGA  
GTAGTGAAAGCGTCCGGCTCAACCGGATATACATTACTCGAACTGCAAAGCTAGAGGATG  
AGAGAGGTTATTGGAATTCCCAGTGTAGGAGTGAATCCGTAGATATTGGGAGGAACACC  
GATGGCGTAGGCAGATAACTGGCTCATTCCTGACACTAAGGCACGAAAGCGTGGGTAGCA  
AACGGGATTAGAGACCCGGGTAGTCC

>Otu1962

CCAGCCTATGGGGCGCAGCAGCGGGGAATATTGCGCAATGGGGGCAACCCTGACGCAGCA  
ACGCCGCGTGAGTGATGAAGGTCCTCGGATCGTAAAGCTCTGTCCGTAGGAAAGATGGTT  
CGCATGGCTAACATCCATGTGAGCTGACGGTACCTACAAAGGAAGCACCGGCTAACTCTG  
TGCCAGCAGCCGCGGTAATACAGAGGGTGCAAGCGTTGTTTCGGAATTATTGGGCGTAAAG  
GGCGCGTAGGCGGTTGTGTAAGTCAATGTGAAAGCCCAGGGCTCAACCTTGGAAGTGCA  
TCCGAAACTACACAACCTGAATCTCGGAGAGGGTGGTGAATTCCCAGTGTAGAGGTGAA  
ATTCGTAGATATTGGGAGGAACACCGGTGGCGAAGGCGACCGCCTGGACGAAGATTGACG  
CTGAGGCGCGAGAGCGTGGGGAGCAAACAGGATTAGAAACCCTCGTAGTCC

>Otu1963

CCAGCCTATGGGGGGCTGCAGTTTCGAATCATTCACAATGGGCGCAAGCCTGATGGTGCG  
ACGCCGCGTGAGCGATGAAGCCCTTCGGGGTGTAAAGCTCTTTCGGCAGGGACGATTATG  
ACGGTACCTGCAGAAGAAGCTGCGGCTAACTACGTGCCAGCAGCCGCGGTAATACGTAGG  
CAGCAAGCGTTGTTTCGGAATTACTGGGCGTAAAGAGTGCGTAGGCGGTTGGGCAAGTCTG  
TTGTGAAATCTCCCGGCTTAACTGGGAGGGTGCGATGGAAACTGCCCGGCTAGAGTGTGG  
GAGAGGGAAGTGGAATTCCTGGTGTAGCGGTGAAATGCGTAGATATCAGGAGGAACACCT  
GCGGTGTAGACGGCTTCCTGGACCACTACTGACGCTGAGGCACGAAAGCGTGGGGAGCAA  
ACAGGATTAGATACCCTTGTAGTCC

>Otu1965

CCAGCCTATGGGAGGCACCAGTGGGGAATATTGGACAATGGGGGCAACCCTGATCCAGCC  
ATGCCGCGTGCAGGAAGACGGCCCTACGGGTTGTAAACTGCTTTTTCGGGGGAATAAACC  
CCCGTATGTATACGGGGTTGAATGTACCTTGAGAATAAGGATCGGCTAACTCCGTGCCAG  
CAGCCGCGGTAATACGGAGGATCCGAGCGTTATCCGGATTTATTGGGTTTAAAGGGTGCG  
TAGGCCGGCCTGGTAAGTCAGGGGTGAAAGACGGTAGCTTAACTATCGCAGTGCCTTTGAT  
ACTGCCGGGCTTGAATGTACTTGAAGTGGGCGGAATGTGACAAGTAGCGGTGAAATGCAT  
AGATATGTCACAGAACACCGATTGCGAAGGCAGCTCACTAAAGTATGATTGACGCTGAGG  
CACGAAAGCGTGGGGATCAAACAGGATTAGATACCCGAGTAGTCC

>Otu1968

CCAGCCTACGGGTCGCAGCAGTCGAGAATCTTCGGCAATGGGGGAAACCCTGACCGAGCG  
ACGCCGCGTGCAGAGATGAAGGCCTTCGGGTTGTAAATCGCTGTCAGAGGGGAGGAAATGC  
CGGTGGGCTCTCCACCGGTTTGACCTATCCTCAGAGGAAGGACGGGCTAAGTTTCGTGCC  
AGCAGCCGCGGTAAGACGGACCGTCCAAACGTTATTTCGGAATCACTGGGCTTAAAGGGTG  
CGTAGGCCGGCCCCGGAAGTTGCGTGTGAAAGCCCTCGGCTCAACCGAGGAATTGCGCGCA

AAACTGCCGGGCTTGAGGGAGACATAGGTGAGCGGAACTTAGGGTGGAGCGGTGAAATGC  
GTTGATATCCTAAGGAACACCAGTAGCGAAAGCGGCTCACTGGGTCTCTTCTGACGCTGA  
AGCACGAAAGCTAGGGGAGCGAAGAGGATTAGAAACCCCTGGTGTCC

>Otu1971

CCAGCCTATGGGGGGCTGCAGTGGGGAATATTGGGCAATGGGGGAAACCCTGATCCAGCC  
ACGCCGCGTGAGTGATGAAGGCCTTCGGGTCGTAAAGCTCTGTGGGAGGGACGAACCGC  
TGATGGTTAATATCCAGCAGCATGACGGTACCTCCTTAGCAAGCACCGGCTAACTTCGTG  
CCAGCAGCCGCGGTAATACGAAGGGTGCAAACGTTGCTCGGAATTATTGGGCGTAAAGCG  
CACGTAGGCGGCTCTACAAGTCGGATGTGAAATCCCTCGGCTTAACCAAGGAAGTGCATC  
CGAAACTGCAGAGCTTGAGTACCAAGAGGATCGCGGAATTCCCAGGTGTAGAGGTGAAGT  
TCGTAGATATCGGGAGGAACACCAGTGGCGAAGGCGGCGATCTGGGTGGATACTGACGCT  
GAGGTGCGAAAGCGTGGGGAGCAAACAGGATTAGATACCCGAGTAGTCC

>Otu1972

CCAGCCTATGGGACGCTGCAGCGGGGAATATTGGACAATGGGCGAAAGCCTGATCCAGCA  
ATGCCGCGTGATGAAGAAGGTCTTCGGATTGTAAAGTTCTTTTGACGGGGACGATGATG  
ACGGTACCCGTAGAATAAGCTCCGGCTAACTTCGTGCCAGCAGCCGCGGTAATACGAAGG  
GAGCTAGCGTTGTTTCGAATTACTGGGCGTAAAGGGCGCGTAGGCGGCTTGGAAGTTGG  
GTGTGAAAGCCCAGGGCTCAACCCTGGAAGTGCCTCAAGACTGCCTTGCTTGAATTCGG  
TAGAGGTTGGTGAATTCCCAGTGTAGAGGTGAAATTCGTAGAGATTGGGAAGAACACCC  
GTGGCGAAGGCGGCCAACTGGACCGACATTGACGCTGAGGCGCGAAAGCGTGGGGATCAA  
ACAGGATTAGAAACCCCTCGTAGTCC

>Otu1973

CCAGCCTACGGGTTGCAGCAGTAGGGAATATTGCGCAATGGAGGAACTCTGACGCAGCG  
ACGCCGCGTGGGTGATGAAGGCCTTCGGGTCGTAAAGCCCTGTGCGAAAGGGAAGAATGAC  
GAAGTAGAGAATATCTACTTCGAGTGACGGTACCTTTAAAGGAAGCACCGGCTAACTACG  
TGCCAGCAGCCGCGGTAATACGTAGGGTGCAAGCGTTGTTTCGAATTATTGGGCGTAAAG  
CGCGTGTAGGCTGTTAGCTAAGTCGATTGTGAAATCCCTGGGCTCAACCGAGGAAGTGCA  
GTCGAAACTAGCTAGCTTGAAGACGGTAGAGGAAGGTAGAATTCCAAGTGTAGAGGTGAA  
ATTCGTAGATATTTGGAGGAATACCGGTGGCGAAGGCGGCCTTCTGGGCCGTTCTTGACG  
CTGAGACGCGAAAGCGTGGGTAGCAAACAGGATTAGATACCCAGTAGTCC

>Otu1974

CCAGCCTATGGGGCGCTGCAGTGGGGAATTTTGGACAATGGGCGAAAGCCTGATCCAGCA  
ATGCCGCGTGTTGAAGAAGGCCTTCGGGTTGTAAAGCACTTTTGTTCGGGAAGAAAAGG  
ACTGGGCTAATATCCTGGTCTGATGACGGTACCGGAAGAATAAGCACCGGCTAACTACGT  
GCCAGCAGCCGCGGTAATACGTAGGGTGCAAGCGTTAATCGGAATTACTGGGCGTAAAGC  
GTGCGCAGGCGGTTTGTAAAGACAGATGTGAAATCCCCGGGCTTAACCTGGGAACTGCAT  
TTGTGACTGGCAAGCTAGAGTATGGCAGAGGGGGGTGGAATTCGCGTGTAGCAGTGAAA  
TGCGTAGATATGCGGAGGAACACCGATGGCGAAGGCAGCCCCCTGGGCCAATACTGACGC  
TCATGCACGAAAGCGTGGGGAGCAAACAGGATTAGAGACCCAGTAGTCA

>Otu1976

CCAGCCTACGGGGCGCTGCAGTCGAGAATTTTTCACAATGGGGGAAACCCTGATGGAGCG  
ACGCCGCGTGAGGATGAAGGCCCTTGGGTCGTAAACTCCTGTCATAAGAGAACAAGAAA  
GTGATAGTATCTTAAGAGGAAGAGACGGCTAACTCTGTGCCAGCAGCCGCGGTAATACAG  
AGGTCTCAAGCGTTGTTTCGGATTCAATTGGGCGTAAAGGGTGCGCAGGCTGTGTGGTAAGT  
CGGGTGTGAAATTTAGAGGCTCAACCTCTAAACTGCATCTGATACTGCCATGCTAGAGGA  
CTGTAGAGGAGATTGGAATTCACGGTGTAGCAGTGAAATGCGTAGATATCGTGAGGAAGA  
CCAGTGGCGAAGGCGAATCTCTGGGCAGTTCCTGACGCTCATGCACGAAGGCTAGGGGAG  
CAAACGGGATTAGATACCCGAGTAGTCC

>Otu1977

CCAGCCTATGGGTGGCTCCAGTTGGGAATCTTGGACAATGGGCGAAAGCCTGATCCAGCC  
ATGCCGCGTGAGTGATGAAGGCCTTAGGGTTGTAAAGCTCTTTTACCCGGGAAGATAATG  
ACGGTACCGGGAGAATAAGCTCCGGCTAACTTCGTGCCAGCAGCCGCGGTAATACGAAGG  
GGGCTAGCGTTGTTTCGAATTACTGGGCGTAAAGCGTGCGCAGGCGGTTTCTCAAGTCAG  
GGGTGAAAGCCCAGAGCTCAACTCTGGAATGCCTTTGAAACTGTGAAGCTCGAGTGCAG  
GAGAGGTGAGTGGAATTCACAGTGTAGAGGTGAAATTCGTAGATATTGGGAAGAACACCG  
GTGGCGAAGGCGGCTCACTGGCCCGTTTCTGACGCTCATGCACGATAGCGTGGGGATCAA  
ACAGGATTAGAGACCCGCGTAGTCC

>Otu1978

CCAGCCTATGGGTCGCAGCAGTCGAGGATCTTCGGCAATGGGCGCAAGCCTGACCGAGCG  
ACGCCGCGTGTGCGATGAAGGCCCTTGGGTTGTAAAGCACTGTCGAGGGGGAGGAAAAGCC  
GCAAGGTCTGACCTATCCCTGGAGGAAGCACGGGCTAAGTTCGTGCCAGCAGCCGCGGTA  
AGACGAACCGTGCAAACGTTGTTTCGGAATCACTGGGCTTAAAGGGCGCGTAGGCCGGCTTG  
CCAAGTCAGGGGTGAAATCTTTCGGCTTAACCGGAAAATTGCTTTTGATACTGGTGAGCT  
TGAGGGAGGTAGGGGCAGGTGGAACCTCCGGTGGAGCGGTGAAATGCGTAGATATCGGAA  
GGAACGCCGGTGGCGAAAGCGACCTGCTGGACCTCTACTGACGCTGAGGCGCGAAAGCCA  
GGGGAGCAAACGGGATTAGAGACCCTAGTAGTCC

>Otu1980

CCAGCCTATGGGGGGCAGCAGTCGAGAATCTTTCGCAATGGGCGAAAGCCTGACGAAGCG  
ACGCCGCGTGTGAGCGAAGAAGGCCCTTCGGGTTGTAAAGCTCTTTCGCTAGGGAACAAGAGA  
ATCAGATTAATAATCTGGTAATTTGATGGTACTTGGTAAAGAAGCACCGGCTAACTCCGT  
GCCAGCAGCTGCGGTAATACGGAGGGTGCAAGCATTGATCGGAATTACTGGGCGTAAAGG  
GCGCGTAGGCGGCAAGAAAAGTCAGATGTGAAATTCCGGGGCTCAACCCCGGAGCTGCAT  
TTGAAACTTTCTAGCTAGAGGTTGGTAAGGGAAAACGGAATTCACGTGTAGCGGTGAAA  
TGCGTAGATATGTGGAAGAACACCGGTGGTGAAGACGGTTTTCTGTGCCAAACCTGACGC  
TGAGGCGCGAAAGCTAGGGGAGCAAACAGGATTAGAAACCCGGGTAGTCC

>Otu1984

CCAGCCTATGGGTTGCACCAGCAACGAATCTTCCGCAATGGGCGCAAGCCTGACGGAGCG  
ACGCCGCGTGTGGGACGAAGTTCTTCGGAATGTAAACCACTGTTAGGGTTATGAAAGCAA  
TGCGCGCTAATACCGCGCAAAGTTGATCTAGCCCAGAGAAAGGGACGGCTAACTCTGTGC  
CAGCAGCCGCGGTAATACAGAGGTCCCAAGCGTTACTGAGATTCACTGGGTTTAAAGGT  
GCGTAGGTGGCGCGTTAAGTTCGTTGTGAAATCCCCGGGCTCAACCCGGGAATTGCTTCG  
AATACTGGCGCGCTTGAGGTCAGCATGGGTTACTGGAACAGACGGTGGAGCGGTGAAATG  
CGTAGATATCGTCTGGAACGCCAGTGGTGAAGCCGGGTAAGTGGACTGATTCTGACACTG  
AGGCACGAAAGCGTGGGGAGCGAACGGGATTAGATACCCCGTAGTCC

>Otu1992

CCAGCCTATGGGTCGCAGCAGTGGGGAATATTGGACAATGGGGGAAACCCTGATCCAGCC  
ATGCCGCGTGAGTGATGAAGGCCCTTCGGGTTGTAAAGCTCTTTCGCACGCGACGATGATG  
ACGGTAGCGTGAGAAGAAGCCCCGGCTAACTTCGTGCCAGCAGCCGCGGTAATACGAAGG  
GGGCAAGCGTTGTTTCGGAATTACTGGGCGTAAAGGGCGCGTAGGCCGGTGCGTTAAGTCAG  
ATGTGAAAGCCCTGGGCTCAACCCGGGAATTGCATTTGATACTGGCGTGCTCGAATCCAG  
GAGAGGTTGGTGGAATTCACAGTGTAGAGGTGAAATTCGTAGAGATTGGGAAGAACACCG  
GTGGCGAAGGCGGCCAACTGGACTGGTATTGACGCCGAGGCGCGAAAGCGTGGGGAGCAA  
ACAGGATTAGATACCCCACTAGTCC

>Otu1995

CCAGCCTATGGGGGGCTGCAGTGGGGAATCTTCCGCAATGGACGAAAGTCTGACGGAGCA  
ACGCCGCGTGATGATGAAGGTCTTCGGATTGTAAAGTACTGTCTTTGGGGAAGAATGAT  
TGGTTTGAAAATATTGAGCCAATATGACGGTACCCAAGGAGGAAGCCCCGGCTAACTACG  
TGCCAGCAGCCGCGGTAATACGTAGGGGGCAAGCGTTGTCCGGAATTATTGGGCGTAAAG  
GGCGCGTAGGCCGATAGTTAAGTCCGGTGTGAAAGATCAGGGCTCAACCCCTGAGAGTGCA  
TCGGAAACTGGTTATCTTGAGGACAGGAGAGGAAAGTGGAATTCCACGTGTAGCGGTGAA  
ATGCGTAGATATGTGGAGGAACACCAGTGGCGAAGGCGACTTTCTGGACTGTAAGTACG  
CTGAGGCGCGAAAGCGTGGGGAGCAAACAGGATTAGAAACCCCACTAGTCC

>Otu1997

CCAGCCTATGGGGGGCTGCAGTGGGGAATATTGGACAATGGGCGCAAGCCTGATCCAGCC  
ATGCCGCGTGAGTGATGACGGCCTTAGGGTTGTAAAGCTCTTTTGGTGGGGACGATGATG  
ACGGTACCCACAGAATAAGCACCGGCTAACTTCGTGCCAGCAGCCGCGGTAATACGAAGG  
GTGCTAGCGTTGTTTCGGAATTACTGGGCGTAAAGGGCGCGTAGGCTGTCTTACAAGTTGG  
GTGTGAAAGCCCAGGGCTCAACCCCTGGAAGTGCCTCAAACTGTTTGACTTGAATTCGA  
TAGAGGTTAGTGGAATTCACAGTGTAGAGGTGAAATTCGTAGATATTGGGAAGAATATCC  
GTGGCGAAGGCGGCTAACTGGACCGACATTGACGCTGAGGCGCGAAAGCGTGGGGATCAA  
ACAGGATTAGAAACCCGAGTAGTCC

>Otu2005

CCAGCCTATGGGGCGCTGCAGTCGAGAATCTTTCGCAATGGGCGCAAGCCTGACGAAGCG  
ACGCCGCGTGAGCGAAGAAGGCCCTTCGGGTTGTAAAGCTCTTTCGCTAGGGAACAAGAAA  
GAAGCACTAATACTGCTTCGATTTGAGGGTACTTGGTAAAGAAGCACCGGCTAACTCCGT  
GCCAGCAGCTGCGGTAATACGGAGGGTGCAAGCATTGATCGGAATTACTGGGCGTAAAGG

GCGCGTAGGCGGATGAGAAAGTCAAATGTGAAATACCGTGGCTCAACTGCGGTGCTGCAT  
TCGAAACTCCTCATCTCGAGCCTAGTTAGGGAAAACGGAATTCACGTGTAGCGGTGAAA  
TGCGTAGATATGTGGAAGAACACCTGTGGTGAAGACGGTTTTCTGGGCTAGAGCTGACGC  
TGAGGCGCGAAAGCTAGGGGAGCAAACAGGATTAGAAACCCAGTAGTCC

>Otu2009

CCAGCCTACGGGTGGCTCCAGTGGGAATATTCCGCAATGGGCGAAAGCCTGACCCAGCG  
ACGCCGTGTGGGTGATGAAGGCCTTCGGGTGTAAAGCCCTGTCGGGTGGGAAGAAGGT  
CCCGCGGTAAATAATCGCGGGATTTTGACGGTACCACCGGAGGAAGCACCGGCTAACTCC  
GTGCCAGCAGCCGCGGTAATACGGAGGGTGCAAGCGTTGTTCCGAATTACTGGGCGTAAA  
GGGCGCGTAGGTGGTTCTGTAAAGTCAGATGTGAAATCCTTCGGCTCAACCGGAGAACTGC  
ATCTGATACTGCAGTGAAGTACAGGAGAGGGAAACGGAATTCAGGTGTAGAGGTG  
AAATTCGTAGATATCTGGAGGAACACCGGTGGCGAAGGCGTTTTCTGGCCTGATACTGA  
CACTGAGGCGCGAAAGCGTGGGGAGCAAACAGGATTAGATACCCAGTAGTCC

>Otu2010

CCAGCCTATGGGGCGCACCACTCGAGAATCTTGGTCAATGGGCGAAAGCCTGAACCAGCG  
ACGCCAAAGACTGAAGAAAGCATCAGCTGTAAAGGTTCGGAACCTTCACGAGGAGAATGACG  
GTAGTGGAGGAGAAGTCTCGTCTAATGATTGTGCCAGCAGACGCGGTCATACAACGGAGG  
CAAGTGTGTTCATCATGACTCGGTGTAAAGGGCAGGTAGGCGGTGATCGGCATGACTTT  
CTCGAAAACGATCCATGCAGGGTCAAGAAGGGAAGAGTAACGCGGTCCTGGAGTCGGAC  
AGAGGTATACGGAATGATTTTCAGGACTAGTGAATGGGTTGATCGAAGTCGGAACCTCCAG  
AGGTGAAGACGGTATACTGGGTTTGAAAGAGAGGTCCAGAAAGTGGACCAGACTGACGCTG  
AACTGCGAAAGCATAGGGATCAAAGGGATTAGAAACCCCGTAGTCC

>Otu2011

CCAGCCTACGGGGGGCTCCAGTAGGGAATATTGCACAATGGAGGAACTCTGATGCAGCG  
ACGCCGCGTGAGTGATGAAGGCCTTCGGGTGTAAAGCTCTGTTCTCAGGGAAAAAGAAA  
GTGATTGTACCTGAGGAGAAAGGACCGGCTAACTTCGTGCCAGCAGCCGCGATAAGACGA  
GGGGTCCTAGCGTTGCTCGGAATTACTGGGCGTAAAGCGGGTGTAGGTGGCTTTGTAAAGT  
CAGAAAGTGAAGCCCTGGGCTTAACCCAGGAAGTGCTTTTGATACTGCTTAGCTCGAGTG  
TGGGAGAGGATAGTAGAATTCAGGTGTAGTGGTGAATACGTAGATATCTGGAGGAATA  
CCGGTGGCGAAGGCGGCTATCTGGCCCAACACTGACACTCAGACCCGAAAGCGTGGGGAT  
CAAACAGGATTAGAAACCCCGTAGTCC

>Otu2012

CCAGCCTATGGGGCGCTCCAGTAGGGAATCTTGCGCAATGGGCGAAAGCCTGACGCAGCG  
ACGCCGCGTGAGGACGATGAAGTTCTTCGGAATGTAAAGTCCTGTCAGGAGGGAAGAAACCT  
TTGCATGTCAAATGCAAAGCTGACGGTACCTCCAGAGGAAGCTACGGCTAACTTCGTGCC  
AGCAGCCGCGGTAATACGGGGGTAGCGAGTGTTGTTTCGGATTTACTGGGCGTAAAGGGAG  
CGCAGGCGGTAATGTAAGTCAGGAGTGAAATGTTGGGGCTTAACCCCAAATCTGCTTTTG  
ATACTGCTTTACTAGAGTATGCAAGAGGAGGATGGAATTCAGGTGTAGCGGTGGAATGT  
GTAGATATCTAGAAGAACACCGATTGCGAAGGCAGTCCTCTGGTGCAATACTGACGCTCA  
GGCTCGAAGGCGTGGGGAGCAAACAGGATTAGAAACCCAGTAGTCC

>Otu2013

CCAGCCTACGGGAGGCACCACTAACGAATCTTCCCAATGCACGAAAGTGTGAGGGAGCG  
ACGCCGCGTGAGGACGAAGTCCTTCGGGATGTAAACTCCTGTCAGGGGTTAGAAAGTTC  
TGATCAACCCAGAGGAAGTGGCGGCTAACTCTGTGCCAGCAGCCGCGGTAAAGACAGAGG  
CCACAAGCGTTAGGCGGAATCACTGGGCTTAAAGCGTGTGTAGGCGGATCGTTAAGTGCC  
TTGTGAAATCCCCCGGCTCAATCGGGGAACGGCTGGGCATACTGGCGATCTTGAGCTGCC  
TAGGGGCGACTGGAACAAGCGGTGGAGCGGTGAAATGCGTAGATATCGCTTGAACGCCA  
ATGGTGAACACAGGTCGCTGGGGGCAAGCTGACGCTGAGACACGAAAGCCAGGGGAGCAA  
ACGGGATTAGAAACCCAGTAGTCC

>Otu2015

CCAGCCTACGGGGGGCAGCAGTAGGGAATTTCCACAATGGGCGAAAGCCTGATGGAGCA  
ACGCCGCGTGACAGGATGAAGGCTCTAGGGTCGTAAACTGCTTTTATATGTGACGATAATG  
ACGGTAGCATATGAATAAGGATCGGCTAACTCCGTGCCAGCAGCCGCGGTACATACGGAGG  
ATCCAAGCGTTATCCGGAATTACTGGGCGTAAAGAGTTGCGTAGGTGGCATAGTAAGCGA  
GTAGTGAAGCGTTTCGGCTCAACCGGATATCCATTACTTGAAGTGTAAAGCTAGAGGATG  
AGAGAGGTTATTGGAATTCCTTGTGTAGGAGTGAAATCCGTAGATATAGGGAGGAACACC  
GATGGCGTAGGCAGATAACTGGCTCATTCCTGACACTAAGGCACGAAAGCGTGGGGAGCAA  
AACGGGATTAGAAACCCGTGTAGTCC



>Otu2016

CAGCCTATGGGGCGCACCAGTAGGGAATTTTGGGCAATGGGCGAAAGCCTGACCCAGCAA  
CGCCGCGTGGAAGGATGAAGGCCTTCGGGTTGTAACTTCTGTTGGATGGGAAAAAAGGT  
AGCAATACCCTGATGGTACCATTCGAGTAAGCACCGGCTAACTACGTGCCAGCAGCCGCG  
GTAATACGTAGGGTGCAAGCGTTGTTCTGGAATTACTGGGCGTAAAGGGAGCGTAGGCGGA  
AATTTAAGTTAGGAGTTTAATTCTCGGGCTTAACCCGAGGCTGGCTCTTAATACTGAGTT  
TCTTGAGTATGGAAGAGGATGACGGAATTCAGGTGTAGCGGTGGAATGCGTAGATATCT  
GGAAGAACACCAGTAGCGAAGGCGGTCATCTGGGCCAATACTGACGCTGAGGCTCGAAAG  
CTAGGGGAGCAAACAGGATTAGATACCCTTGTAGTCC

>Otu2017

CCAGCCTATGGGATGCACCAGTGGGGAATTTTGCGCAATGGGGGAAACCCTGACGCAGCA  
GCGCCGCGTGAGTGATGAAGGCTTTCGGGTCGTAAAGCTCTGTCACTGGGGAAGAAATGG  
GGCGTGCTAATACCGCGTCTTCTTGACGGTACCCACAAAGGAAGCACCGGCTAACTCCGT  
GCCAGCAGCCGCGTAATACGGGGGGTGCAAGCGTTGTTCTGGATTTATTGGGCGTAAAGC  
GCGTGTAGGCGGTTTTTTAAGTCTGATGTGAAAGCCCTGGGCTCAACCCAGGAAGTGCAT  
TGGATACTGGAAGACTTGAATACGGGAGAGGGTAGTGGAATTCCTAGTGTAGGAGTGAAA  
TCCGTAGATATTAGGAGGAACACCGGTGGCGAAGGCGGCTACCTGGACCGATATTGACGC  
TGAGACGCGAGAGCGTGGGGAGCAAACAGGATTAGATACCCGAGTAGTCC

>Otu2019

AGCCTATGGGATGCACCAGTCGAGAATTTTTCGCAATGGACGAAAGTCTGATGGAGCGAC  
GCCGCGTGAGGATGAAGGTTTTTCGGATTGTAACTCCTGTCACTGCAGAACAAAGGCTAT  
GTTCTGTTAACAGCGAATGTAGTTGATGGTATGCGGAGAGGAAGGGACGGCTAACTCTGTG  
CCAGCAGCCGCGAGTAAGACAGAGGTCCCAGCGTTGTTCTGGATTCATTGGGCGTAAAGGG  
TGTGTAGGAGGTGGGGTAAGTCAGGTGTGAAATCTCCGAGCTTAACTCGGAAACTGCAAT  
GGAACTATCCGACTAGAGGAATGGAGGGGAGACTGGAATACTTGGTGTAGCAGTGAAAT  
GCGTAGATATCAAGTGGAACACCAGTGGCGAAGGGGAGTCTCTGGACATTTCTTGACGCT  
GAGGCACGAAAGCCAGGGGAGCAAACGGGATTAGAAACCCTCGTAGTCC

>Otu2020

CCAGCCTATGGGGTGCAACCAGCCAAGAATCTTCCGCAATGGGCGAAAGCCTGACGGAGCG  
ACGCCGCGTGAGGGAAGAAGGTCTTTCGGATTGTAAACCTCTTTTGTAAAGGAAGAATAAG  
TTGCGTAGGAAATGACGCGATGATGACGGTACTTTATGAATAAGCCCCGGCTAATTACGT  
GCCAGCAGCCGCGTAATACGTAAGGGGCGAGCGTTACTCGGAATTACTGGGCGTAAAGG  
GCGTGTAGGCGGTTTTCACAAGTCGAATGTAAAAAACACAGCTCAACCGTGGGTCTGCGT  
TCGAAACTGTGAGACTTGAGTCTGGTGGAGGGCAATGGAATTCCTGGTGTAGCGGTGAAA  
TGCGTAGATATCGGGAAGAACACCGAAGGCGAAAGCAGTTGTCTATGCCAAGACTGACGC  
TGAGGCGCGAAAGCATGGGGATCAAACAGGATTAGAAACCCCGTAGTCC

>Otu2022

CCAGCCTACGGGGGGCAGCAGTGGAGAATATGTGGGCAATGAGCGAAAGCTTAACCCCGG  
AAAGTTTTGTGGGGGACGACAAGCCTGCTTGTAACCCCTTTCGGCAAATGAGGATTATG  
ACATTAGTTTTGAGGCAAGATAGTCCTGACTAATGTTCTGTGCCAGCAGTTGCGGTAAGACG  
GATGGGGCCAGCGTTATTGGGCTTTACTGGGTGTAAAGGGTACGTAGACAGTTTTTAATTT  
ATTAGTGTAAGGTCTGGGTAAACTTTTTTACCTTGATATAATATAATGAACTTGA  
GTTTAGTAGAAGTAAGTAATTTTAAAGGGATGATATCCTTCGAAATTTAAAGGA  
ATGCTAAATGTGAAAACATGTTGCTATTTTAACTGACGTTAAAGTACGAAAGCATAGGG  
ATCAAACAGGATTAGATACCCTTGTAGTCC

>Otu2023

CCAGCCTATGGGATGCACCAGTGAGGAATATTGGGCAATGGACGGAAGTCTGACCCAGCC  
ATGTCGCGTGGAAGGATGAAGGCGTTCTGCGTTGTAACTTCTTTTACCTGGGAAGAAACC  
ACCCTTTTCTAAGGGTGTGACGGTACCAGGGGAATAAGCACCGGCTAACTCCGTGCCAG  
CAGCCGCGGTAATACGGAGGGTGCAAGCGTTATCCGGATTTACTGGGTTTAAAGGGTGTG  
TAGGCGGGCTATTAAGTCTGGGGTGAATCTCCGAGCTCAACTCGGAAACTGCCTTGGAT  
ACTATTAGCCTTGAATTATGTTGAGGTTAGCGGAATATAACATGTAGCGGTGAAATGCAT  
AGATATGTTATAGAACACCGATTGCGAAGGCAGCTAACTAAGCATATATTGACGCTGAGG  
CACGAAAGCGTGGGGATCAAACAGGATTAGATACCCCTGTAGTCC

>Otu2026

CCAGCCTACAGGTGGCACCAGTGGGGAATCTTGCGCAATGGGCGAAAGCCTGACGCAGCC  
ACGCCGCGTGAGTGAAGAAGGCCTTTCGGGTTGTAAAGCTCTGTCTGGGCGGGACGAAAATG  
CCTGGTGTAAACAGCGCCAGGTACTGACGGTACCGCCAAAGGAAGCACCGGCTAACTTCG

TGCCAGCAGCCGCGGTAATACGAGGGGTGCAAGCGTTGCTCGGAATTATTGGGCGTAAAG  
GGTAGGTAGGTGGTCTCATTGTCTAGGGTGAAAGCCTTGAGCTTAACCCAAGAAGTGCC  
CCAGAAACGGTGAGACTCGAGTCTTGAGAGGGTGTGGAATTCCTGGTGTAGCGGTGAA  
ATGCGTAGAGATCGGGAGGAACACCAGAGGCGAAGGCGGCAACCTGGACAAGTACTGACA  
CTCAACTACGAAAGCGTGGGGAGCAAACAGGATTAGAAACCCGAGTAGTCC

>Otu2028

CCAGCCTATGGGTGGCTGCAGTAGGGAATATTGGTAATGGGCGAAAGCCTGAACCAGCAA  
CGCCGCGTGAGCGATGAAGGCCTTCGGGTGTAAAGCTCTTTTGAGGGGGATGAGGAAGG  
ACAGTACCCTTCGAATAAGCCTCGGCTAACTACGTGCCAGCAGCCGCGGTAAAACGTAGG  
AGGCGAGCGTTATCCGGATTTACTGGGCGTAAAGCGCGCGTAGGCGGCACGGCAAGTTGG  
ATGTGAAAGCTCCCGCTTAACTGGGAGAGGTCTTCAAACTGCCGAGCTAGAGGATGT  
GAGAGGGAGGTGGAATTCGGGTGTAGTGGTGAAATGCGTAGATATCCGGAGGAACACCA  
GTGGCGAAAGCGGCCTCCTGGCACATAACTGACGCTCATGTGCGAAAGCTAGGGTAGCAA  
ACAGGATTAGATACCCGTGTAGTCC

>Otu2029

CCAGCCTATGGGACGCAGCAGTCGAGGATCTTCGGCAGTGGGCGCAAGCCTGACCGAGCG  
ACGCCGCGTGCGCGATGAAGGCCTTCGGGTGTAAAGCGCTGTCGAGGGGGAGGAAACCG  
CAAGTTGACCTATCCCTGGAGGAAGGACAGGCTAAGTTCGTGCCAGCAGCCGCGGTAAAG  
ACGAACCGTCCTAACGTTGTTTCGGAATCACTGGGCTTAAAGGGCGCGTAGGCGGGCTTCC  
AAGTCCGGGGTGAAATCTTTCGGCTTAAACGGAAAATAGCCTTGGATACTGGGAGTCTCG  
AGTGAGGTAGGGGCGGGTGGAACCTCCGGTGAGCGGTGAAATGCGTTGATATCGGAAGG  
AACGCCGCTGGCGAAAGCGACCCGCTGGACCTCTTCTGACGCTGAGGCGCGAAAGCCAGG  
GGAGCAAACGGGATTAGAAACCCGTTAGTCC

>Otu2031

CCAGCCTACGGGACGCTGCAGTAAGGGATATTGCGCAATGGGCGAAAGCCTGACGCAGCA  
ACGCCGCGTGAGGAAGAAGGCCTTCGGGTGCTAAACTCGTTTTGACGCCGACGAGCAAG  
GACGGTAAGCGTCGAATAAGTCACGGCTAACTACGTGCCAGCAGCCGCGGTAAAACGTAG  
GTGGCGAGCGTTATCCGGATTTACTGGGCGTAAAGGGTGTGCAGGCGGGTTCGTCAAGTGG  
TGTATGAAAGCGCCCGGCTTAAACGGGGCGTAGTTATGCCAGACTGACGACCTAGAGGACG  
AGAGAGGGGCGTGGAATTCGGGTGTAGTGGTGAAATGCGTAGAGATCCGGAAGAACCCC  
AGAGGCGAAGGCGGCCCTGGCTCGTCCCTGACGCTCAGACACGACAGCATGGGGAGCG  
AACGGGATTAGAAACCCGAGTAGTCC

>Otu2033

CCAGCCTATGGGTGGCAGCAGTGGGGAATCTTCCACAATGGGCGAAAGCCTGATGGAGCA  
ACGCCGCGTGAGTGATGAAGGCCTTCGGGTGTAAACTCTTTCGTGCGAGAATAACGCT  
GCAGGGTGAACAATCCTGCAGCTTGACTGTATCGCAGGAAGAAGACACGGCTAACTCTGT  
GCCAGCAGCCGCGTAATACAGAGGTGTGAGCGTTGTCCGGATTTACTGGGCGTAAAGG  
GCGTGTAGGCGGGTGGGTAAAGTCGGATGTGAAATCGCTGGGCTTAACTCAGCAACTGCAT  
CCGAAACTGCTTGTCTTGAGTGCAGAAGAGGAAAGCGGAATTCCTGGTGTAGCGGTGAAA  
TGCGTAGATATCGGGAGGAACACCAGTGGCGAAGGCGGCTTCTGGTCTGCAACTGACGC  
TGAAACGCGAAAAGCTAGGGGAGCAAACGGGATTAGAAACCCTAGTAGTCC

>Otu2034

CCAGCCTACGGGATGCTGCAGTCGAGAATCTTCGGCAATGGACGCAAGTCTGACCGAGCG  
ACGCCGCGTGCGGGATGAAGGTCTTCGGATTGTAAACCGCTGTCAGAGGGGATGAAGTGT  
ACGGGAGTTCTCTCCTGTATTTGACAGAGCCTCAGAGGAAGCACGGGCTAAGTTTCGTGCC  
AGCAGCCGCGGTAATACGAACGTGTGCGAACGTTATTTCGGAATCACTGGGCTTAAAGGGTG  
CGTAGGCGGTTACCTAAGTCAGGTGTGAAATCTCTCGGCTCAACCGGGAACTGCGCTTG  
AACTGGGTGACTGGAGTGAGGCAGGGGTGTGTGGAACCTCCGGTGAGCGGTGAAATGT  
GTAGATATCGGAAGGAACGCCAGCAGCGAAAGCGGCACACTGGGCCTTTTCTGACGCTGA  
GGCACGAAAGCTAGGGGAGTGAACGGGATTAGATACCCCTCGTAGTCC

>Otu2036

CCAGCCTACGGGTTGCTGCAGCCGAGAATATTGACAATGGGCGAAAGCCTGATCGAGCG  
ATACCGCGTGGTGGATGAAGCGATTTCGTGCGGTAAACATCTTTTATGGAGGAGGAAGTAA  
TTGACGTTACTCCATGAATAAGGGGCTCCAAACTCTGTGCCAGCAGGAGCGGTAATACAG  
AGGCCCCGAGCGTTACCCGGAATTACTGGGCGTAAAGAGTGCGTAGGTGGTTGTGTAGT  
CGGGCGTTAAATATCCAGGGCTCAACCTTGGAACCCGTCGAAACGGCACAACTTGAGG  
GAGTGAGAGGTGAATGGAACCTTAAGTGTAGGCGTGAAATCCGTTGATATTTAGGGGAAC  
ACCGAAAGCGAAGGCAATTCCTGACACTCAAGCACGAAAGCGTGGGTA

GCGAACGGGATTAGAAACCCCTCGTAGTCC

>Otu2045

CCAGCCTATGGGAGGCTCCAGTAAGGAATATTGGTCAATGGACGCAAGTCTGAACCAGCC  
ATGCCGCGTGAGGATGAAGGCCCTCTGGGTGTAAACTCCTGTCATTGGTGAACAAGGC  
GGCCCGTTAACTGCGGAGCCGCTCGATAGTAGCCGAAGAGGAAGAGACGGCTAACTCTGT  
GCCAGCAGCCGCGGTAATACAGAGGTCTCGAGCGTTGTTTCGGATTTCATTGGGCGTAAAGG  
GTGCGTAGGCGGCGGGGTAAAGTCTGATGTGAAATCCCGGGGCTCAACCCTGGAAGTGCAT  
TGGATACTGCCTTGCTAGAGAGCTGGAGAGGAACTGGAATTTACGGTGTAGCAGTGAAA  
TGCGTAGAGATCGTAAGGAAGACCAGTGGCGAAGGCGAGTTTCTGGACAGCTACTGACGC  
TGAGGCACGAAGGCCAGGGGAGCAAACGGGATTAGATACCCTAGTAGTCC

>Otu2046

CCAGCCTACGGGGCGCACCAAGTGGGGAATTTTACACAATGGGCGAAAGCCTGATGTAGCG  
ACACCGCGTGAGTGAAGAAGCCCCCTTGGGGTGTAATACTCTGTTCGGCAGGGACGAAAAAA  
ATGACGGTACCTGCAAAGGAAGCATCGGCTAACTACGTGCCAGCAGCCGCGGTAAGACGT  
AGGATGCAAGCGTTGTCCGGATTTATTGGGCGTAAAGAGTTCGTAGGTGGTTTTGTAAAGT  
CTGATGTTAAAGACTGGGGCTCAACCTCGGGAGTGCATTGGATACTGGCAGACTGGAGTG  
CAGTAGAGGCAAGCGGAATTTCCAGTGTAGCGGTGAAATGCGTAGATATTGGGAAGAACA  
CCGGTGGCGTAAGCGGCTTGCTGGGCTGTAAGTACACTGAGGAACGAAAGCTAGGGGAG  
CAAATGGGATTAGAGACCCGCGTAGTCC

>Otu2047

CCAGCCTATGGGGGGCACCAAGTTCGAGAGGCTTCGGCAATGGGGGAAACCCTGACCGAGCG  
ACGCCGCGTGAGGGATGAAGGCCCTTGGGTGTAAACCCCTTTTGTTCGGGAAGAAATGC  
GATCAGGTGAACAATCTGGTCGTTTGACGGTACCGGACGAATAAGCTCCGGCTAACTCCG  
TGCCAGCAGCCGCGGTAACACGGGGGAGCAAGCGTTGTTTCGGAATCACTGGGCGTAAAG  
GGCGTGTAGGCGGTCTGGTAAGTGAGATGTGAAATCCCTCGGCTCACCCGAGGATCTGCA  
TCTCATACTGCTAGGCTTGAGTACGGGAGAGGACGAGGAAATTCCTGGTGTAGCGGTGAA  
ATGCGTAGATATCAGGAGGAACACCGGTGGCGAAAGCGCTCGTCTGGCCCCGATACTGACG  
CTGATGCGCGAAAGCTAGGGGAGCAAACGGGATTAGAAACCCCGGTAGTCC

>Otu2053

CCAGCCTATGGGGCGCTGCAGTCGAGAATCTTCGGCAATGGGCGCAAGCCTGACCGAGCG  
ACGCCGCGTGCGGGATGAAGGCCCTCGGGTGTAAACCGCTGTTCAGAGGGAAAGAAATGC  
CAAGGGGTCTCTTCTTGGTTTGACTGACCTTCAGAGGAAGTACGGGCTAAGTTCGTGCC  
AGCAGCCGCGGTAAGACGAACCGTACGAACGTTACTCGGAATCACTGGGCTTAAAGGGTG  
CGTAGGCTGTCCGTAAGTCGGGTGTGAAATACCTCAGCTCAACTGAGGAATTGCGCCCCG  
AAACTGTCGGAAGTTCGAGGGAGACAGAGGTGAGCGGAAGTTCAGGGTGGAGCGGTGAAATGC  
GTTGATATCCTAAGGAACACCAGTGGCGAAAGCGGCTCACTGGGTCTCTTCTGACGCTGA  
GGCACGAAAGCTAGGGGAGCGAACGGGATTAGATACCCTCGTAGTCC

>Otu2054

CCAGCCTACGGGGTGCTGCAGTGGGGAATTTTGGACAATGGGGGCAACCCTGATCCAGCC  
ATGCCGCGTGCGGGAAGAAGGCCTTCGGGTGTAAACCGCTTTTGGTTCGGGAAGAAAAGG  
CATTTTCCTAATAGGGGTGTTCTTGACGGTACCGGCAGAATAAGCACCGGCTAACTACGT  
GCCAGCAGCCGCGGTAATACGTAGGGTGCAGTGTAAATCGGAATTACTGGGCGTAAAGC  
GTGCGCAGGCGGTTTTGTAAAGTCTGATGTGAAAGCCCCGGGCTCAACCTGGGAATGGCAT  
TGGAAGTGGCAAGCTCGAGTTTGGCAGAGGGGGGTGGAATTCGCGGTGTAGCAGTGAAA  
TGCGTAGAGATGCGGAGGAACACCGATGGCGAAGGCAGCCCCCTGGGCTAAGACTGACGC  
TCAGGCACGAAAGCGTGGGGAGCAAACAGGATTAGATACCCACAGTAGTCC

>Otu2055

CCAGCCTACGGGTGGCTCCAGGCGCGAAAACTCTACAATGCAGGCAACTGCGATAGGGGA  
ACATCGAGTGGCATTTCATATTGGGTGTCTGTCTCCAGCCTAAAAAGCTGGGGTTAGCAA  
GGGCCGGGCAAGACCGGTGCCAGCCGCCGCGGTAATACCGGCGGCTCGAGTGGTGGCCGA  
TATTATTGAGTCTAAAGGGTCCGTAGCCGGCTTTGCAAGTCTTTCGGGAAATCCAGCGGC  
TTAACCGTTGGTCTCGGGGGGTACTACATTGCTTGGGACTGGGAGAGGTAGGAGGTAC  
TCAGGGGGTAGGAGTGAAATCCTGTAATCCTTTGGGGACCACCGGTGGCGAAGGCGTCCCT  
ACCAGAACAGGTCCGACGGTGAGGGACGAAAGCTAGGGGCACGAACCGGATTAGAAACCC  
TCGTAGTCC

>Otu2056

CCAGCCTATGGGTTGCAGCAGCCAGGAATATTGGGCAATGGGCGAAAGCCTGACCCAGCG  
ACACCGCGTGGGGGAAGAAGGCCCTCGGGTGTAAACCCCTTTTATTAGGGACGAATAAT

GACGGTACCTGATGAATAAGCTTCGGCTAACTACGTGCCAGCAGCCGCGGTAATACGTAG  
GAAGCGAGCGTTATCCGGATTTATTGGGCGTAAAGCGGGCGTAGGTGGCTTTTCAAGTCC  
GATGTGAAATCTCCTGGCTTAACTGGGAGGGTGCATCGGATACTGTTGAGCTGGAGTGCA  
GCAGAGGAAGATGGAATTCCTGGTGTAGTGGTGAATGCGTAGATATCGGGAGGAACACT  
AGTGGCGAAGGCGGTCTTCTGGGCTGTAACGACACTGAGGTCCGAAGGCGTGGGGAGCA  
AACAGGATTAGAAACCCGCGTATCC

>Otu2058

CCAGCCTACGGGGCGCAGCAGGCGCGAAACCTTTACAATGCTGGAAACAGCGATAGGGGG  
ACCTCGAGTGCCACCGTACAACGGTGGCTGTCGTTGTGTCTAAAAACACGATATAGCAA  
GGGCCGGGCAAGACCGGTGCCAGCCGCCGCGGTAACACCGGCGGCTCGAGTGGTAACCGC  
TATTATTGGGTTTAAAGGGTCTGTAGCCGGCCGGATAAGTCTCTTGGGAAATCTGGCAGC  
TCAACTGTCAGGCTTTCAGGAGATACTGTTCCGGCTCGAGACCGGGAGAGGTGAGAGATAC  
TTCAGGGGTAGGGGTGAAATCTTGTAATCCTTGAAGGACCACAGTGGCGAAGGCGTCTC  
ACCAGAACGGATCTGACGGCAAGGGACGAAAGCTAGGGGCACGAACCGGATTAGAAACCC  
GCGTAGTCC

>Otu2061

CCAGCCTTGGGGGGCAGCAGTCGAGAATTTTTTACCAATGGGCGAAAGCCTGATGGAGCGA  
CGCCGCGTGGGGGATGAAGGGCTTCGGCTCGTAAACCCCTGTCATTCTGTGAACAATACCT  
GGGCATGAACAGTGTTTCAGGTTGATAGTAACGGAAGAGGAAGGGACGGCTAACTCTGTGC  
CAGCAGCCGCGGTAATACAGAGGTCCCGAGCGTTGTTCCGATTTACTGGGCGTAAAGGGT  
GCGTAGGCGGTTCGGGTAAGTCTAACGTGAAATCTCCAAGCTTAACTTGAAAGTGCCTTG  
GATACTATCCGACTTGAGTTCCGGAGAGGGGACTGGAATTCTCGGTGTAGCAGTGAAATG  
CGTAGATATCGAGAGGAACACCAGTGGCGAAGGCGGGTCTCTGGACGGATACTGACGCTG  
AGGCACGAAAGCCAGGGGAGCAAACGGGATTAGATACCCCCGTAGTCC

>Otu2065

CCAGCCTATGGGTGGCAGCAGTCGAGGATTTTTCTCAATGGGGGAAACCCCTGAAGGAGCG  
ACGCCGCGTGGGGGATGAAGGACTTCGGTTCGTAAACCCCTGTCATTGGGAACAAAAGT  
TTCAACCCAACACGTTGGAGCCTGATAGTACCAGGAGAGGAAGGCACGGCTAACTCTGTG  
CCAGCAGCCGCGGTAATACAGAGGTGCCAAGCGTTGTTCCGATTTATTGGGCGTAAAGGG  
TGCGTAGGCGGCCATGCAAGTCGGGTGTGAAATCCCGGAGCTCAACTCCGGAACGGCATT  
CGGAAGTGCCTGGCTGGAGATCTGGAGAGGTGACTGGAATTCTCGGTGTAGCAGTGAAAT  
GCGTAGATATCGAGAGGAACACCAGAGGCGAAAGCGAGTCACTGGACAGAATCTGACGCT  
GAGGCACGAAAGCCAGGGGAGCAAACGGGATTAGAAACCCCCGTAGTCC

>Otu2066

CCAGCCTACGGGTGGCACCAGTAGGGAATATTGGGCAATGGGCGAAAGCCTGACCCAGCA  
ACGCCGCGTGCACGATGAAGGCCTTCGGGTCGTAAAGTGCTTTTCTGAGGAATGAGAAAG  
GACAGTACCTCAGGAATAAGCCTCGGCTAACTACGTGCCAGCAGCCGCGGTAACACGTAG  
GAGGCGAGCGTTATCCGGATTTACTGGGCGTAAAGCGTGTGCAGGCGGTACGGCAAGTTG  
GATGTGAAAGCTCCTGGCTTAACTAGGAGAGGTGCTTCAATACTACCGAACTTGAGGTCA  
TCAGAGGAAGGTGGAATTCCCGGTGTAGTGGTGAATGCGTAGATATCGGGAGGAGCACC  
AGTGGCGAAAGCGGCCTTCTGGGATGATTCTGACGCTCATACACGAAAGCTAGGGTAGCG  
AACGGGATTAGAGACCCGAGTAGTCC

>Otu2068

CCAGCCTACGGGGGGCACCAGTGAGGAATTTTGACAATGGGGGCAACCCTGATCCAGCA  
ACGCCGCGTGAAGGACGACGGTCTTCGGATTGTAAACTTCTTTTATTTCGGGACTAAGAAA  
TCTGTAGAAATACGGAGAGTGAATGTACCGGATGAATAAGCCACGGCTAACTTCGTGCCA  
GCAGCCGCGGTAATACGAAGGTGGCAAGCGTTACTCGGAATTACTAGGCGTAAAGGGCAG  
GTAGGTGGTTTGGTTAGTCTGTTGTTAAACTTTTCGGCTTAACCGAAAGAGGTCAATAGA  
TACTGCCAGACTTGAGTATAGGAGAGGATACTGGAATTCCCGGTGTAGCGGTGAAATGCG  
CAGAGTTCGGGAGGAACACCAATGGCGAAAGCAGGTATCTGGACTATTACTGACACTCAG  
CTGCGAAAGCTAGGGGAGCAAACAGGATTAGATACCCCCGTAGTCC

>Otu2071

CCAGCCTACGGGATGCAGCAGTAACGAATATTCACAATGCGCGAAAGCGTGATGGAGCG  
ATGCCGCGTGCAGGATGAAGCCCCTCGGGGTGTAAACTGCTGTCAGGGTTTACCAACAAA  
ATGAGGAGACCCAAAGGAAGAGACGGCTAACTCTGTGCCAGCAGCCGCGGTAATACAGAG  
GTCTCGAGCGTTAATCGGAGTTACTGGGCTTAAAGGGTGCCTAGGCGGTTCCGTAAAGTGC  
TTTGTGAAATCCCATGGCTTAAACCATGGAATGGCTTGGCAGACTGCGGAACTTGAGGTGC  
GTAGGGGTGCTGGAAGTCTAGGTGGAGCGGTGAAATGCGTAGATATCTAGAGGAACGCC

AAAGGTGTAGACAGGCGACTGGGCCGATTCTGACGCTGAGGCACGAAAAGCGTGGGGAGCG  
AACGGGATTAGAAACCCGCGTAGTCC  
>Otu2072  
CCAGCCTACGGGTCGCTCCAGTGGGGAATTTTGC GCAATGGGGGAAACCCTGACGCAGCA  
ACGCCGCGTGAGGAAGAAGTATTTTCGGTACGTAAACTCCTTTTCGATCGGGACGATAATG  
ACGGTACCGAGAGAAGAAGCCCCGGCTAACTTCGTGCCAGCAGCCGCGGTAATACGAGGG  
GGGCAAGCGTTGTTTCGGAATTATTGGGCGTAAAGGGTGC GTAGGCGGTTTGGTAAGTTTT  
GTGTGAAAAC TATGGGCTCAACCCATAGCCTGCACGAAAAACTGCCGGGCTAGAGTATTG  
GAGAGGTGAGTGGAATTCCTGGTGTAGCGGTGAAATGCGTAGATATCAGGAGGAACACCT  
GTGGCGAAAGCGGCTCACTGGACAATAACTGACGCTGATGCACGAAAGCTAGGGGAGCAA  
ACAGGATTAGATACCCTCGTAGTCC  
>Otu2073  
CCAGCCTATGGGGGGCAGCAGTTGGGAATATTGGACAATGGGGGAAACCCTGATCCAGCA  
ATCCCGCGTGAGTGATGAAGGCCTTCGGGTTGTAAAGCTCTTTTGGTGGGGAAAAAGGGA  
AACTTGATGGTACCCACAGAAAAAGCACCGGCTAACTCCGTGCCAGCAGCCGCGGTAATA  
CGGAGGGTGCAAGCGTTGTTTCGGAATCATTGGGCGTAAAGCGCGTG TAGGCGGTTACCTA  
AGTCTGGCGTGAAAGCCCGGGGCTCAACTCCGGA ACTGCACTGGATACTGGGTGACCCGA  
GGATGAGAGAGGATGGCGGAATTCCTGGTGTAGGGGTGAAATCCGTAGATATCAGGAGGA  
ATATCGGTGGCGAAGGCGGCCATCTGGCTCATTTCTGACGCTGAGACGCGAAAGCGTGGG  
GAGCAAACAGGATTAGAGACCCTCGTAGTCC  
>Otu2074  
CCAGCCTATGGGGGGCTCCAGTGAGGAATATTGGTCAATGGACGCAAGTCTGAACCAGCC  
ATGCCGCGTGAGGATGAAGGCCTTCTGGGTTGTAAACTCTTTTATGGGGGAAGAAAAT  
TACGGTATCTACTGTAACCGACGGTACCCTAGGAATAAGCACCGGCTAACTCCGTGCCAG  
CAGCCGCGGTAATACGGAGGGTGCAAGCGTTATCCGGATTTACTGGGTTTAAAGGGTGTG  
TAGGCGGGCATTTAAGTCAGTGGTGAAATCTTTCGGCTTAACGGGAAAACTGCCATTGAT  
ACTATTTGTCTTGAATTTTGTGTGAGGAGGGCGGAATATGTCATGTAGCGGTGAAATGCAT  
AGATATGACATAGAACACCGATAGCGAAGGCAGCTCTCTAAGCAGATATTGACGCTGAGG  
CACGAAAGCGTGGGGATCAAACAGGATTAGATACCCGCGTAGTCC  
>Otu2076  
CCAGCCTACGGGACGCTGCAGTGAGGAATCTTGC GCAATGGGGGAAACCCTGACGCAGCA  
ACGCCGCGTGAGTGAGGAAGGTTTTTCGAACCGTAAAGCTCTGTCAGGTGGAAGAAATGT  
ATGGGTGTTAATAGCGTCCATACTTGACGGTACCACCAGAGGAAGCACCGGCTAACTCCG  
TGCCAGCAGCCGCGGTAATACGGGGGGTGCAAGCGTTGTTTCGGAATCATTGGGCGTAAAG  
AGCGTGTAGGCGGCTTGACAAGTCAGATGTGAAAGCCCTGGGCTTAACCCAGGAAGTGCA  
TTTGAAACTGTCTGGCTAGAGTAAGGAAGAGGAAAGCGGAATTCCTGGTGTAGAGGTGAA  
ATTCGTAGATATCAGGAGGAACACCGGTGGCGAAGGCGGCTTTCTGGTCCTATACTGACG  
CTGAGACGCGAGAGCGTGGGTAGCAAACAGGATTAGAAACCCCGGTAGTCC  
>Otu2079  
CCAGCCTACGGGTCGCGAGCAGTTAGGAAAAATCTGCAATGCGCGCAAGCGTGACAGAGCA  
AGCCAAAGTGTTTCTATAATTGAAACACTTTTATGCAATCTAAAAAGTTGCATGAATA  
AGGACTGGGCAAGACTGGTGCCAGCCGCCGCGGTAATCCCAGCGGTCCGAGTCGCAGCCA  
CATTTATTGGGTCTAAAACATCCGTAGCTCGTTGATTAAAGTTTCATGTAAAATCCAGCAT  
CTTAAGTGTTGGGCTGCATGAAATACTGTTCAACTAGAGACCGGGAGACGCAAGAAGTAC  
ATTTTCGGGTAGCGGTAAAATGCGTTGATCCTTGATGGACTAACAACAGCGAAGGCATCTT  
GCGAGAACGGTTCTGACAGTGAGGGATGAAGGCTAGGGGCGCAAATTGGATTAGAGACCC  
CTGTAGTCC  
>Otu2080  
CCAGCCTATGGGTTGCTGCAGTCGAGAATCTTCGGCAATGGGCGCAAGCCTGACCGAGCG  
ACGCCGCGTGTTGGGATGAAGGCCCTTGGGTTGTAAACCACTGTCGGAGGGGATGAAGTGC  
ATAGGAGCAATCTCCTGTGTTTGACATAGCCTCAGAGGAAGCACGGGCTAAGTTTCGTGCC  
AGCAGCCGCGGTAATACGAACTGTGCGAACGTTATTTCGGAATCACTGGGCTTACAGGGTG  
CGTAGGCGGCTTGCTAAGTAGGGTGTGAAAGCCCCCGGCTCAACCGGGGAATTGCGCCCT  
AAACTGGCGAGCTAGAGTGAGTAGGGGTATGTGGA ACTTCCGGTGGAGCGGTGAAATGT  
GTTGATATCGGAAGGAACGCCGCTGGCGAAAGCGACATACTGGATCTTGTCTGACGCTGA  
GGCACGAAAGCCAGGGGAGCGAACGGGATTAGAAACCCCGTAGTCC  
>Otu2081  
CCAGCCTACGGGTCGCTGCAGTAGGGAATATTGCTCAATGGGCGAAAGCCTGAAGCAGCA

ACGCCGCGTGACGAAGAAGGTCTTCGGATCGTAAAGTGCTTTTCTGGGAGATGAGAAAAG  
GACAGTATCCCAGGAATAAGTCTCGGCTAACTACGTGCCAGCAGCCGCGGTAAAACGTAG  
GAGGCAAGCGTTATCCGGATTCACTGGGCGTAAAGCGCATGCAGGCGGTTCCGGTAAGTTG  
GGCGTGAAATCTCCCGGCTCAACTGGGAGAGGTCTTCAATACTACCGGGCTAGAGAGCA  
GTAGAGGAAGATGGAATTCCCGGTGTAGTGGTGAAATGCGTAGATATCGGGAGGAACACC  
TGTGGCGAAAGCGGCGCACTGGACCATAACTGACGCTGAGGCGCGAAAGCTAGGGGAGCA  
AACAGGATTAGAAAACCCGAGTAGTCC

>Otu2082

CCAGCCTATGGGGGGCTGCAGTCGAGAATCTTCCGCAATGGGGGAAACCCTGACGGAGCG  
ACGCCGCGTGCGGGATGAAGGTCTTCGGATTGTAAACCGCTGTCACCCGGGATGAACGTT  
GACCGTACCGGGAGAGGAAGCCACGGCTAACTACGTGCCAGCAGCCGCGGTAATACGTAG  
GTGGCGAGCGTTATTCGGATTTATTGGGCGTAAAGGGTCCGTAGGGGGCTTGGTGTGGCC  
GGTGTGAAATGTCAAGGCTCAACCTTGAAAATGGCACTGGCGACTGCCGGGCTGGAGTGCC  
GCAGAGGAAAGTGGAATTCTTGGTGTAGCGGTGGAATGCGTAGATATCAGGAGGAACACC  
GAAGGCGAAGGCAGCTTTCTGGGCGGCAACTGACCCTGAGGGACGAAAGCTGGGGGAGCA  
AACAGGATTAGAAAACCCCGTAGTCC

>Otu2084

CCAGCCTATGGGTTGCAGCAGTAAGGGATATTGCTCAATGGCCGAAAGGCTGAAGCAGCA  
ACGCCGCGTGAAGGATGAAGTCCTCTCGGATGTAAACTTCTGTAGAGAAGGAGAAAACCC  
CCACTCTGTGGGGATTGATAGTACTTCTAAAGTAAGCCCCGGCTAACTACGTGCCAGCAG  
CCGCGGTAATACGTAGGGGGCAAGCGTTGTCCGGATTTACTGGGTGTAAAGGGTGCTCAG  
GTGGTTTTATAAGTCAGAGGTGAAATCTAAAGCTTAACTTTTGAACGGCCTTTGATACT  
GTAGAACTTGTGTACGGAAGAGGGCGATGGAATTCCAGGTGTAGCAGTGAAATGCGTAGA  
TATCTGGAGAAACACCAGTGGCGAAGGCGGTCGCTGGTCCGGTACAGACACTAAAGCAC  
GAAAGCGTGGGTAGCAAACAGGATTAGATACCCGAGTAGTCC

>Otu2086

CCAGCCTACGGGAGGCAGCAGTAGGGAATATTGGGCAATGGGCGAAAGCCTGACCCAGCC  
ATGCCGCGTGCAAGGATTGAATGTTCTATGAATTGTAAACTGCTTTTATCTGGGACGAAAA  
AATTCGGTTTTTCGAAAACTGACGGTACCAGATGAATAAGGACCGGCTAACTCCGTGCCA  
GCAGCCGCGGTAATACGGAGGGTCCAAGCGTTATCCGGATTCACTGGGTTTAAAGGGTGC  
GTAGGTGGTCAGAAAAGTCAGTGGTGAAATCCTACAGCTTAACTGTAGAACTGCCATTGA  
AACTTTCTGGCTTGAGTGTCTTAAGGCGAGTGGAATGTAACATGTAGCGGTGAAATGCT  
TAGATATGTTACAGAACACCAATTGTGAAGACAGCTCGCTGGACGACAACCTGACATTGAG  
GCACGAAAGCGTGGGTAGCGAACAGGATTAGAAAACCCAGTAGTCC

>Otu2087

CCAGCCTACGGGTGGCAGCAGCAACGAATCTTCCCCAATGGACGAAAGCCTGAGGGAGCG  
ACGCCGCGTGAGGACGAAGTACTTCGGTATGTAAACTCCTGTTAGGGTTATGAAAGCGA  
CTGCGCCTAATACGCGCGGAAGTTGATCTGATCCAGAGAAAGGGACGGCTAACTCTGTGC  
CAGCAGCCGCGGTAATACAGAGGTCCCAAGCGTTACTGAGAATCACTGGGTTTAAAGGGT  
GCGTAGGTGGTCCGTTAAGTTCGTTGTGAAATCCCTGGGCTCAACCCAGGAAGTCTTCG  
AATACTGGCGGACTTGAGGCCGGTAGGGGTCACTGGAACAGATGGTGGAGCGGTGAAATG  
CGTAGATATCATCTGGAACGCCGGTGGTGAAGACGGGTGACTGGGCCGGTTCTGACACTG  
AGGCACGAAAGCATGGGGAGCGAACGGGATTAGAGACCCGCGTAGTCC

>Otu2088

CCAGCCTACGGGACGCAGCAGCAACGAATCTTCCCCAATGCCGGAACGGTGAGGGAGCG  
ACGCCGCGTGAGGACGAAGTACTTCGGTATGTAAACTCCTGTTAGGGTTACGAAAGCGA  
CGGGGCCTAATACGCCCCTAGTTGATCTAGCCCAGAGAAAGGGACGGCTAACTCTGTGCC  
AGCAGCCGCGGTAATACAGAGGTCCCAAGCGTTACTGAGAATCACTGGGTTTAAAGGGT  
CGTAGGTGGTCCGTTAAGTCGGTTGTGAAATCCCCGGGCTCAACCCGGGAAGTCTTCG  
ATACTGGCGGACTTGAGGCCGGTAGGGGTCACTGGAACAGACGGTGGAGCGGTGAAATGC  
GTAGATATCGTCTGGAACGCCGGTGGTGAAGACGGGTGACTGGGCCGGTTCTGACACTGA  
GGCACGAAAGCGTGGGGAGCGAACGGGATTAGATACCCAGTAGTCC

>Otu2089

CCAGCCTACGGGGTGCTGCAGTAACGAATCTTCCACAATGCACGAAAGTGTGATGGAGCG  
ACGCCGCGTGTGGGATGAAGTCCTTCGGGATGTAAACCACTGTCAGGGGTTACCAAGTTC  
TGAGGAGCCCCAGAGGAAGGCACGGCTAACTCTGTGCCAGCAGCCGCGGTAAGACAGAGG  
TGCCAAGCGTTAGGCGGAATCACTGGGCTTAAAGCGTGTGTAGGTGGATGTCTAAGTACC  
TTGTGAAATCCCACGGCTTAACCGTGGAAGTCTCGGTATACTGGATGTCTTGAGCCACC

TAGGGGCGAGCGGAACAAATGGTGGAGCGGTGAAATGCGTAGATATCATTTGGAACGCCA  
ATGGTGAACACAGCTCGCTGGGGGTGTGCTGACACTGAGACACGAAAGCCAGGGGAGCAA  
ACGGGATTAGATACCCCAGTAGTC

>Otu2090

CCAGCCTATGGGGGGCAGCAGTGAGGAATATTGGTCAATGGGGGCAACCCTGAACCAGCC  
ATGCCGCGTGAGGAAGAAGGCCCTAAGGGTTGTAACTTCTTTTGTACGGGGGTAACTT  
CGGATACGTGTATCCGACTGAAAGTACTGTACGAATAAGCAACGGCTAACTCCGTGCCAG  
CAGCCGCGGTAATACGGAGGTTGCAAGCGTTATCCGGATTTATTGGGTTTAAAGGGTGCG  
TAGGCGGGTTTGTAAAGTCAGTGGTGAAAGACTGTCGCTTAACGATAGCATTGCCATTGAT  
ACTGCAGGTCTTGAGTACACTTGAGGTAGGCGGAATGTGTAGTGTAGCGGTGAAATGCTT  
AGATATTACACAGAACACCAACTGCGAAGGCAGCTTACTAAATTGTCACTGACGCTGAGG  
CACGAAAGCGTGGGGATCAAACAGGATTAGATACCCCTGTAGTCC

>Otu2091

CCAGCCTATGGGTTGCAGCAGTGGGGAATTTTGGACAATGGGGGCAACCCTGATCCAGCC  
ATTCCGCGTGAGTGAAGAAGGCCTTCGGGTTGTAAAGCTCTTTCGGCAGGAACGAAAAGG  
CAGGCTCTAACATAGTCTGTTGATGACGGTACCTGAAGAAGAAGCACCGGCTAACTACGT  
GCCAGCAGCCGCGGTAATACGTAGGGTGCAGCGTTAATCGGAATTACTGGGCGTAAAGC  
GTGCGCAGGCGGTTTTGTAAAGACAGATGTGAAATCCCCGGGCTTAACCTGGGAAGTGCCT  
TTGTGACTGCAAGACTTGAGTGCAGGAGGGGGGTGGAATTCACGTGTAGCAGTGAAA  
TGCGTAGAGATGTGGAGGAACACCGATGGCGAAGGCAGCCCCCTGGGCTAGTACTGACGC  
TCATGCACGAAAGCGTGGGTAGCAAACAGGATTAGATACCCCCGTAGTCC

>Otu2093

CCAGCCTACGGGTTGCAGCAGCAGGGAATATTGCGCAATGGGCGAAAGCCTGACGCAGCA  
ACACCGCGTGAGGGAAGAAGGCCTTCGGGTCGTAAACCTCTTTTGTAGGGAAGAAAAAT  
GACGGTACCTAATGAATAAGTCACGGCTAACTACGTGCCAGCAGCTGCGGTAATACGTAG  
GTGGCAAGCGTTATCCGGATTCACTGGGCGTAAAGAGCGCGTAGGTGGTCCTTCAAGTCA  
GATGTTAAATATTCCGGCTTAACCTGGAAGAGGTCATCTGATACTGCTGGACTTGAGGACG  
GTAGAGGGAGGTGGAATTCCCCGGTGTAGTGGTGAAATGCGTAGATATCGGGAGGAACACC  
AGTGGCGAAAGCGGCCTCCTAGGCCGTTCTTGACACTGAGGCGCGAAAGCGTGGGGAGCG  
AACAGGATTAGAGACCCGCGTAGTCC

>Otu2095

CCAGCCTATGGGTCGCAGCAGTAAGGAATATTGCGCAATGGGCGAAAGCCTGACGCAGCG  
ACGCCGCGTGAGGGGATGAAGTCTTCGGATTGTAAACCCCTTTTCGGGAGGGAAGATGAAA  
TGGGGTAACCCATTTCGGACGGTACCTCCAGAAGCAGCCACGGCTAACTTCGTGCCAGCAG  
CCGCGGTAATACGAAGGTGGCAAGCGTTATTCGGATTTACTGGGCGTACTGGGAGCGTAG  
GCGGTTTCGGTAAGCCCTCTGTGAAATCTTCAGGCTTAACCTGGAAAAGTCGGAGGGGACT  
GCTGGGCTAGAGGACGGGAGAGGAGCGCGGAATTCCCCGGTGTAGCGGTGAAATGCGTAGA  
GATCGGGAGGAAGGCCGGTGGCGAAGGCGGCGCTCTGGAACGTTTCTGACGCTGAGGCTC  
GAAAGCGTGGGGAGCAAACAGGATTAGATACCCCCGTAGTCC

>Otu2096

CCAGCCTATGGGGTGCAGCAGTGAGGAATTTTGTCTCAATGGGCGCAAGCCTGAAGCAGCG  
ACGCCGCGTGAAATGATGAAGTTCTTCGGAATGTAAAGTTCTTTTGGCAGGGAATAATTATG  
ATTGTACCTGCAGAATAAGCACCGGCAAACTATGTGCCAGCAGCCGCGGTAATACATAGG  
GTGCAAGCGTTGTCCGGAATTACTGGGCGTAAAGAGCGTGATAGGCGGCACTTTAAGTCGC  
AACCTTAAATACAGGGGCTTTACCCCTGTCAAGGTTTCGATACTGATGTGCTAGAGATTGG  
GAGAGGAAGCGGAACCTCACAGTGTAGCGGTGAAATGCGTAGATATTGTGAGGAACACCC  
GTGGCGAAGGCGGCTTTCTGGACCATTTCTGACGCTGAGACGCGAGAGCGTGGGGATCAA  
ACAGGATTAGAGACCCGGGTAGTCC

>Otu2098

CTAGCCTACGGGATGCAGCAGTAGGGAATTTTGTCTCAATGGGCGAAAGTCTGACGCAGCA  
ACGCCGCGTGAGTGATGACGGTCTTCGGATTGTAAAGCTCTGTTGAGTGGGAAGAAAAGT  
TCCGTTAATAGCGGAGCCTGACGGTACCGCTCGAGGAAGCCCCGGCTAACTACGTGCCAG  
CAGCCGCGGTAATACGTTGGGGGCGAGCGTTGTTTCGGAATCACTGGGCGTAAAGGGAGCG  
TAGGCGGGTCTGTAAAGTTAGGAGTTTAATTCCCCGGGCTTAACCCGGGGCCGGCTTTTAAT  
ACTGCAGATCTTGAGTAGGGAAGAGAGAGATGGAATTTTCAGGTGTAGCGGTGGAATGCGT  
AGATATCTGAAAAGAACACCAGTAGCGAAGGCGGTCTCCTGGTACCATACTGACGCTGAGG  
CTCGAAAGTTAGGGGAGCAAACAGGATTAGATACCCCTGGTAGTCC

>Otu2099

CCAGCCTATGGGTGGCAGCAGTGAGGAATATTGGTCAATGGGGGCAACCCTGAACCAGCC  
ATGCCGCGTGAAAGGAAGACTGCCCTAAGGGTTGTAAACTTCCTTTGTACTAGGGTAAACT  
TGTTCTTTCGAGGACAACCTGAAAGTATAGTACGAATAAGCATCGGCTAACTCCGTGCCAG  
CAGCCGCGGTAATACGGGGGATGCAAGCGTTATCCGGATTTATTGGGTTTAAAGGGTGCG  
TAGGCGGATACATAAGTCAGTGGTGAAAGACTGTTGCTTAACGATAGCATTGCCATTGAT  
ACTGTGTGTCTTGAGTGTAGATGAGGTAGGCGGAATGTGTAGTGTAGCGGTGAAATGCTT  
AGATATTACACAGAACACCGATTGCGAAGGCAGCTTACTAATCTACCACTGACGCTGAGG  
CACGAAAGCGTGGGGATCAAACAGGATTAGAAACCCTTGTAGTCC

>Otu2101

CCAGCCTATGGGGGGCTGCAGTGGGGAATTTTGGACAATGGGCGAAAGCCTGATCCAGCA  
ACTCTGCGTGAGGGATGAAGTCCTTCGGGATGTAAACCTCTTTTGCCGGGGACGAATACC  
CGCAAGGGTCTGACGGTACCCGGCGAATAAGCCACGGCTGACTACGTGCCAGCAGCCGCG  
GTAAGACGTAGGTGGCGAGCGTTATTCGGAATTACTAGGCGTAAAGCGAGTGTAGGCGGG  
CGCTTAAAGTCCGTCGTGAAATCTCCCGGCTCAACTGGGAGGGGTCGATGGATACTGGGTG  
CCTTGAGTGGGGTAGGGGGCAGTGGAATTCGCGGTGTAGCGGTGAAATGCGTAGATATCG  
GGAGGAACACCTATGGTGAAAGCAGCTGCCTGGGCCCTTACTGACGCTGAGACTCGAAAG  
CTAGGGGAGCAAACAGGATTAGATACCCTAGTAGTCC

>Otu2102

CCAGCCTATGGGGCGCACCCAGTGAGGAATTTTCCGCAATGGACGAAAGTCTGACGGAGCG  
ACGCCGTGTGTGTGATGAAGTCCTTCGGGATGTAAACACTGTGAGAGGGACGATATTG  
ACGGTACCTCTGGAGGAAGCCCCGGCTAACTACGTGCCAGCAGCCGCGGTAATACGTAGG  
GGGCGAGCGTTGTCCGGAATTATTGGGCGTAAAGGGCGTGTAGGCGGTTCGTAAGTTGG  
ACGTTAAAGGTATGGGCTCAACTCATACATCGCGTTCAATACTGCGGTCTGGAGAATGG  
TAGAGGAAAACGGAACCTTCGCGGTGTAGCGGTGAAATGCGTAGATATCGGAAGGAACACCA  
GTGGCGAAGGCGGTTTTCTGGGCCATTTCTGACGCTGAGGCGCGAAAGCTAGGGGAGCAA  
ACAGGATTAGATACCCCCGTAGTCC

>Otu2103

CCAGCCTACGGGGTGCTCCAGGCGCGAAACCTTTGCAATGCACGTAAGTGTGACAAGGGA  
ATTCAGAGTGCTCATACAAAGTATGGGCTTTTGCCAAGAACAATATCTTGAGAAATAAG  
TGGTGGGAAAGACTGGTGCCAGCCGCCGCGGTAACCCAGCGCCACTAGTGGGAATCGCG  
TTTATTGGGCCTAAAGCATCCGTAGCTGGTTATGTAAATCTCTTGTGAAATTGTTAGACT  
CAATCTAACAGCGCGCAGGAGACACTGCAAAACTAGGGACCGGGAGGAGTCAGAGGTATG  
CTATGGGGAGCGGTAAAATGCTATAATCCATGGTAGACCACCTGTGGCGAAGGCGTCTGA  
CTAGAACGGGTTGACAGTGAGGGATGAAAGCCAGGGGAGCAAACCGGATTAGATACCCC  
TG TAGTCC

>Otu2106

CCAGCCTATGGGGCGCTGCAGTCGAGGATCTTCGTCAATGGGCGAAAGCCTGAACGAGCG  
ATGCCGCGTGAGCGATGAAGGCCTTCGGGTGTAAAGCTCAAAGAGATGAGAAAGGGAA  
ACTTGATCGAATCTCAGTAAGCTCGGGCTAAGTTTCGTGCCAGCAGCCGCGGTAAGACGAA  
CCGAGCGAACGTTGTTTCGGAATCACTGGGCTTAAAGGGCGCGTAGGCGGGTGCTCAAGTC  
CGGGGTGAAATCCTCCAGCTCAACTGGGAACTGCCTCGGATACTGGGTGCCTCGAGGGT  
GGCAGGGGTATGCGGAACTATCGGTGGAGCGGTGAAATGCGTTGATATCGATAGGAACTC  
CGGTGGCGAAGGCGGCATACTGGTCCACTTCTGACGCTGAGGCGCGAAAGCCAGGGGAGC  
AAACGGGATTAGATACCCTGGTAGTCC

>Otu2110

CCAGCCTATGGGTGGCAGCAGTGGGGAATTTTGCACAATGCCCCGAAAGGGTGATGCAGCA  
ACGCCGCGTGAGGGATGAAGGCCTTCGGGTGTAACCTCTTTTCGACCGGGAAAAACGGG  
CGGGTGAATAATCCGCTCTGATGGTACCGGTGGAAGAAGCCCCGGCCAACTACGTGCCAG  
CAGCCGCGGTAATACGTAGGGGGCGAGCGTTGTTTCGGAATTACTGGGCGTAAAGGGCGTG  
TAGGCGGTGCGGTAAAGTCGGACGTTAAATCCCCGGGCTTAACCCGGGGCAGTCGTTGCAA  
ACTGCCGTGCTCGAGTACGGGAGAGGGAAGTGGAATTCCAGGTGTAGCGGTGAAATGCGT  
AGATATCTGGAGGAACACCGGCGGCGAAGGCGGCTTCCTGGACCGTAACCTGACGCTGAGG  
CGCGAAAGCTAGGGGAGCAAACAGGATTAGATACCCTAGTAGTCC

>Otu2111

CCAGCCTACGGGGGGCAGCAGCTAAGAATCTTCCGCAATGCCGGAACGGTGAGGGAGCG  
ACGCCGCGTGAAAGATGAAGCACTTCGGTATGTAAACTTCTTTTAGGGTTAAGAAAGCAG  
AGGGACCTAATACGTCTCTGAGTTGATCTAATCCAGAATAAGGGGCGGCTAACTCTGTGCC  
AGCAGCCGCGGTAATACAGAGGCCCAAGCGTTACTGAGAATCACTGGGTTTAAAGGGTG



CGTAGGTGGTCCGTAAAGTTCGTTGTGAAATCCCCGGGCTCAACCCGGGAAGTCTTCGA  
ATACTGGCGGACTTGAGGCCGGTAGGGGTCCTGGAACAGACGGTGGAGCGGTGAAATGC  
GTAGATATCGTCTGGAACGCCGGTGGTGAAGACGGGTGACTGGGCCGGTTCTGACACTGA  
GGCACGAAAGCGTGGGGAGCGAACGGGATTAGAAACCCCTGTAGTCC

>Otu2113

CCAGCCTATGGGGGGCACCAGGCGCGAAACCTTTGCCATGCGCGAAAGCGTGACAGGGGA  
ACTCCGAGTGGTAGAGGGGTTACCTCTCTATCTTTTGGCCGATCCAAACAATCGGCAGA  
ATAAGATCTGGGTAAGACCAGTGCCAGCCGCCATGCGCGTGAACATTCGCACGCACGGCA  
CGGTACGCGGTAATACTGGCAGAGCAAGTGGTACCCACGAATATTGGGCCTAAAGAGTCC  
GTAGCGGGCCGATTAAGTCCACTGTGAAATCGGGCGGCTCAACCGTCCGGCGTGACAGTGG  
ATACTGACCGGCTTGGGAGCGGGGAGGTGCGGAGTACTTGCGGGGTAACGGTAAATGT  
TGTAATCCTGCAAGGACTACCAGTGGCGAAGGCGCCCGACCAAACGCGTCCGACCGTGA  
GGGACGAAGGCTAGGAGAACGAATCGGATTAGAAACCCGTGTAGTCC

>Otu2114

CCAGCCTATGGGGGGCAGCAGTGAGGAATATTGCGCAATGCCCGAAAGGGTGACGCAGCG  
ACGCCGCGTGAGGATGAAGGCCCTATGGGTGCTAAACTTCTTTTGTGAGGGAATAATTT  
CTTGCTATACGCAGGATTGAATGTACCTTAAGAAAAGCATCGGCTAACTACGTGCCAGC  
AGCCGCGGTAATACGTAGGATGCTAGCGTTGTCCGGATTTACTGGGTGTAAAGGGAGCGC  
AGGCGGGTTGGTAAGTCCGTGGTGAATACTCGAGCTTAACTCGGGAAGTCCCATCGATA  
CTGCTGATCTTGAGTGTGGAAGAGGTTGATGGAATTCTTGGTGTAGCGGTGAAATGCGTA  
GATATCAAGAAGAACCAATGGCGAAGGCAGTCAACTGGTCCATTACTGACGCTCATGC  
TCGAAAGCGTGGGGATCAAACAGGATTAGATACCCTCGTAGTCC

>Otu2116

CAGCCTATGGGGCGCAGCAGTGAGGAATATTGCGCGATGGACGAAAGTCTGACGCAGCAA  
CGCCGCGTGGGGGATGAAGGTGCTTTGCATTGTAAACCCCTGTAGGGGGGGACGAATAAG  
CCGGTTTTTGCCGGTGATGACGGTACCCCCAAAGTAAGCACCGGCTAACTCCGTGCCAGCA  
GCCGCGGTAATACGGAGGGTGCGAGCGTTGTCCGGATTTACTGGGTGTAAAGGGCGTGTA  
GGCGGGAGAATGTGTCGGAAGTGAAATCGTGCGGCTTAACCGTGTCAAATGCTTCCGAAA  
CTGTTCTTCTTGAATGCGGGAGAGGCAGATGGAATTCCAGGTGTAGCGGTGGAATGCGTA  
GATATCTGGAAGAACACCGGTGGCGAAGGCGGTCTGCTGGCCCGTGATTGACGCTGAGGC  
GCGAAAGTGTGGGGAGCAAACAGGATTAGAAACCCGAGTAGTCC

>Otu2118

CCAGCCTACGGGGTGACAGCAGTGGGGAATTTTGGACAATGGGGGAAACCCGTATCCAGCC  
ATGCCGCGTGAGTGAAGAAGGCCTTCGGGTGTAAAGCTCTTTCGGACGGAAAGAAATCG  
CACGGATAAATAGTCCGTGTGGATGACGGTACCGTAAGAAGAAGCACCGGCTAACTACGT  
GCCAGCAGCCGCGGTAATACGTAGGGTGCGAGCGTTAATCGGAATTACTGGGCGTAAAGC  
GTGCGCAGGCGGTTGCATAAGACAGATGTGAAATCCCCGGGCTCAACCTGGGAACTGCGT  
TTGTGACTGTGCGACTGGAGTACGGTAGAGGGGGGTGGAATTCCTGGTGTAGCAGTGAAA  
TGCGTAGATATCAGGAGGAACATCGATGGCGAAGGCAGCCCCCTGGACCTGTACTGACGC  
TCATGCACGAAAGCGTGGGGAGCAAACAGGATTAGAAACCCCGTAGTCC

>Otu2119

CAGCCTATGGGGGGCAGCAGTGAGGAATATTGGGCAATGGGCGCAAGCCTGACCCAGCCA  
TGCCGCGTGAAAGGATGAATGCCCTATGGGTGTAAACTTCTTTTGTACGGGACGAAACTC  
TTGGTTCGTGACCAGGATTGACTGTACCGTGCGAATAAGCATCGGCTAACTCCGTGCCAGC  
AGCCGCGGTAATACGGAGGATGCAAGCGTTATCCGGATTCATTGGGTTTAAAGGGTGCGT  
AGGCGGAATAATAAGTCAGTGGTGAACCTTCAGCTTAACCTGGAGACTTGCCATTGATA  
CTGTTAGTCTCGAGTACGGTCAAGGTAGGCGGAATGTGTAATGTAGCGGTGAAATGCTTA  
GATATTACACAGAACACCGATTGCGAAGGCAGCTTACTGGGCCATTACTGACGCTGATGC  
ACGAAAGCGTGGGGAGCGAACAGGATTAGAAACCCGCGTAGTCC

>Otu2122

CCAGCCTATGGGATGCAGCAGGCGCGAAACCTTTACAATGCTGGCAACAGCGATAAGGGG  
ACCTCGAGTGCTACGATACAACTCGTGGCTGTCTAGTTGCCTAAAAAGCAATTGATAGCAA  
GGGCCGGGCAAGACCGGTGCCAGCCGCCGCGGTAACACCGGCGGCTCGAGTGGTAACCGC  
TATTATTGGGTCTAAAGGGTCTGTAGCCGGCTTAGTTAGTCTCTTGAGAAATCTGGCCGC  
TCAACGGTCAGGCGTTCAGGGGATACTGCTAAAGCTCGAGACCGGGAGAGGTGAGAGGTA  
CTTCAGGGGTAGGGGTGAAATCTTGTAATCCTTGAAGGACCACAGTGGCGAAGGCGTCT  
CACCAGAACGGATCTGACGGCAAGGGACGAAAGCTAGGGGCACGAACCGGATTAGATACC  
CCTGTAGTCC

>Otu2123

CCAGCCTACGGGTGTCACCAGCTAAGAATCTTCCGCAATGGGCGAAAGCCTGACGGAGCG  
ACGCCGCGTGATGATGAAGGCCGAAAGGTTGTAAATCCTTTTCTTGGGGAAGAATAAT  
GATTGGAGTGGAGTGCCAGTCAGATGACATTAAGGGAATAAGCCCCGGCTAATTACG  
TGCCAGCAGCCGCGGTAATACGTATGGGGCAAGCGTTGTTCCGATTTATTGGGCGTAAAG  
GGCGTGTAGGCGGTTTCGTAAAGCTCGGCGTGAAATACTCTGGCTTAACCAGAGAAACGCG  
TTGGGAAGTGCAGAGCTAGAGTTTAGGAGGGGAAGCTGGAATTCCTGGTGTAGGGGTGAA  
ATCTGTAGATATCAGGAAGAACACCAAAGGCGAAGGCAAGCTTCTGGACATAGACTGACG  
CTGAGGCGCGAAAGCGTGGGGAGCAAACAGGATTAGAAACCCCCGTAGTCC

>Otu2124

CCAGCCTATGGGGTGCAGCAGTCGAGAATATTCCACAATGGACGAAAGTCTGATGGAGCG  
ACGCCGCGTGAGGATGAAGGCCCTTGGGTTGTAACTGCTTTTGTAAAGGAAGAATTTT  
GTTGACGGTACCTTACGAATAAGAGGTTACTAACTCTGTGCCAGCAGTAGCGGTAATACA  
GAGACCTCAAGCGTTATCCGGATTTATTGGGCGTAAAGAGCTGGTAGGTTGTTATACTAG  
TCAGATGTCAAATCTTCGAGCTCAACTCGAAAAGTGCATTTGAAACGGTATAGCTAGAGG  
GTGTGAGAGATCTATGGAAGTCATGGTGTAGCAGTGAAATGCGTTGATATCATGAGGAAC  
ACCAAAGGCGAAGGCATTAGATTGGCACACTCCTGACACTGAGCAGCGAAAGCGTGGGTA  
GCGAATGGGATTAGATACCCGTGTAGTCC

>Otu2125

CCAGCCTATGGGAGGCACCAGGCGCGAAACCTCTGCAATGCGCGAAAGCGTGACAGGGGA  
ACTCTGAGTGGCAGCCGGCTTTTAGCCGACTGTCTTTTGGCGAACCTAAACCGTTCGCAG  
AATAAGTTCTGGGTAAGACCAGTGCCAGCCGCCATGGGCATATGCATATTGCCACGGTA  
CGCGGTAATACTGGCAGAACGAGTGGTGCCACGAATATTGGGTCTAAAGAGACCGTAGC  
TGGTCTGTTAAGTCCACTGTGAAATCTTGGGGCTCAACCTCAAGGCGTGACGTGGATACT  
GGCAGGCTTGAGAGCGGGGGAGGTGAGGGGTACTTACGGGGTATGAGTAAAATCAGTTGA  
TCCTGTAAGGACCACCAGTGGCGAAGGCGCCTGACCAAAACGCGTCTGACAGTGAGGGTC  
GAAGGCTAGGAGAACGAATCGGATTAGAAACCCGAGTAGTCC

>Otu2126

CCAGCCTATGGGGGGCAGCAGTTTAGAATATTGTGCAATGGGCGAAAGCCTGACACAGCG  
ACGCCGCGTGGGTGATGAAGGCCCTTCGGGTCGTAAAGCCCTGTTGGTAGGGATGAGAAGG  
GACAGTACCTACCGAGGAAGCCCCGGCTAACTACGTGCCAGCAGCTGCGGTAATACGTAG  
GGGGCGAGCGTTGTCCGAATTTACTGGGCGTAAAGCGTACGTAGGCGGCTCTACAAGTTA  
CATCTTAAAGGCGTCAGCTCAACTGGCGAGTGTGGTGTAAAGACTGCAGGGCTTGAGGCAA  
TCAGAAGAATGTGGAAGTCCGAGTGTAGCGGTGGAATGCGTAGAGATTCGGAAGAACACC  
CATGGCGAAGGCAGCATTCTGGGATTGACCTGACGCTGAGGTACGAAAGCCAGGGGAGCG  
AACGGGATTAGAAACCCGTGTAGTCC

>Otu2127

CCAGCCTATGGGATGCTGCAGTGGGGAATATTGGACAATGGGCGCAAGCCTGATCCAGCC  
ATGCCGCGTGAGTGATGACGGCCTTAGGGTTGTAAAGCTCTTTCGCCAGGGACGATAATG  
ACGGTACCTGGATAAGAAGCCCCGGCTAACTACGTGCCAGCAGCCGCGGTAATACGTAGG  
GGGCAAGCGTTGTTCCGAATCACTGGGCGTAAAGGGAGAGTAGGCGGGAAAATAAGTTAG  
AAGTTTAATGTCCGGGCTTAACCCGGAATCTGCTTCTAATACTGTTTTTCTTGAGTATTG  
GAGAGGGAGATGGAATTCAGGTGTAGCGGTGGAATGCGTAGATATCTGGAAGAACACCA  
GCTGCGAAGGCGGTCTCCTGGCCAAATACTGACGCTGATGCTCGAAAGCTAGGGGAGCAA  
ACAGGATTAGAGACCCCCGTAGTCC

>Otu2128

CCAGCCTACGGGATGCAGCAGTGGGGAATATTGGACAATGGGCGAAAGCCTGATCCAGCA  
ATGCCGCGTGATGATGAAGGCCCTGCGGGTTGTAAAGCACTTTCGTTGGGGAAGAAATGC  
TCAAAGCTAATACCTTTGAGAGTTGACGTTACCCAAAGAAGAAGCACCGGCTAACTCTGT  
GCCAGCAGCCGCGGTAATACAGAGGTTGCAAGCGTTAATCGGAGTTACTGGGCGTAAAGG  
GCGCGTAGGTGGATATTTAAGTCGGATGTGAAATCCCCGGGCTTAACCTGGGAATTGCAT  
TCGATACTGGATATCTAGAGTATGGTAGAGGAAAGCGGAATTCCTGGTGTAGCGGTGAAA  
TGCGTAGATATCGGGAAGAACATCAGGGCGAAGGCGGCTTCTGGACCAATACTGACACT  
GAGGCGCGAAAGCGTGGGGAGCAAACAGGATTAGAAACCCGTGTAGTCC

>Otu2129

CCAGCCTATGGGGGGCAGCAGTCGGGAATATTGCCCAATGGACGAAAGTCTGAGGCAGCA  
ACGCCGCGTGCGCGATGAAGGCCCTTCGGGTCGTAAAGCGCTTTTCGGGTGGATGAGAGAG  
GACAGTACACCCGAATAAGATACGGCTAACTACGTGCCAGCAGCCGCGGTAACCGTAG

GTACCGAGCGTTATCCGGATTTACTGGGCGTAAAGCGCGTTCAGGCGGTTTGGCAAGTCG  
GGCATGAAATCCTTCGGCTCAACCGGGGGAGGTTGTCCGATACTGCTGAACTGGAGGGCA  
GTAGAGGGTGGTGGAAATTCGGGTGTAGTGGTGAATGCGTAGAGATCCGGAGGAACACC  
AGTGGCGAAAGCGGCCACCTGGACTGTACCTGACGCTGAAACGCGAAAGCTAGGGGAGCG  
AACGGGATTAGAAACCCTAGTAGTCC

>Otu2130

CCAGCCTATGGGGGGCTGCAGTCGAGAATCTTCCGCAATGGGCGAAAGCCTGACGGAGCG  
ACGCCGCGTGGTTGATGAAGTCCTTCGGGACGTAAAAACCTTTTATGATTAAGAAAGTTT  
ATTGATCTGATCATGAATAAGGGGCTCCAACTCTGTGCCAGCAGGAGCGGTAATACAGA  
GGCCCCAAGCGTTGTCCGGAATCACTGGGCGTAAAGGGTGTGTAGGTGGTTTTTGTAGTC  
TCTCGTTAAATCTCCCGACTCAATCGGGAACATGCGAGAGATACGGCAAACTTAGAGAG  
TGCGAGAGGTGAATGGAACATGAGGTAGGGGTGAAATCCGTTGATATCATGGGGAACA  
CCAAAAGCGAAGGCAATTCCTGAGTGGCGCATTTCTGACACTGAAACACGAAAGCGTGGGTAG  
CGAATGGGATTAGATACCCAGTAGTCC

>Otu2134

CCAGCCTATGGGTGGCTCCAGCTAAGAATATTCCGCAATGGACGAAAGTCTGACGGAGCG  
ACGCCGCGTGGATGAAGAAGGCCGAAAGGTTGTAAATCCTTTTGTGGGAAGAATAAG  
CGTGGGAGGGAATGCCCGCGTGATGACATGAACCGACGAATAAGTCCCGGCTAACTACGT  
GCCAGCAGCCGCGTAACACGTAGGGGACAAGCGTTATTCGGAATTACTGGGCGTAAAGG  
GCATGTAGGCGGCTTTGTAAAGCCTGGCGTGAAAGTCACCGGCTCAACCGGTGGATTGCGT  
CGGGAACATGCAGGGCTTGAGTCACGGAGAGGGAGCTAGAATTCCTGGTGTAGGGGTGAAA  
TCTGTAGAGATCAGGAAGAATACCAACGGCGAAGGCAAGCTCCTGGCCGATGACTGACGC  
TGAGGTGCGAAAATGTGGGGATCAAACAGGATTAGAGACCCCTCGTAGTCC

>Otu2135

CCAGCCTATGGGATGCTCCAGGGCGTATTTTTCTTTGGGCCAGTTGCTCAGTCCACAGAG  
GCGATATCCCGCCTCTTTCAACTCTCGAAGAATCTCTACCACCGGCTGGACAGCGCCCT  
CAGAGACTCGAGATAGCGTTTCGTCTGAAGCCCGGATCAGATCATGGTATTCGGGAAAACG  
CGCGATCAGTTCCGCTGTCCCTTCGGCGAAAAGAGCGTCCACGGTCTTGCTCCAGGTTCCA  
TCCGGTAAATCGACCTCCTTCAAAAAACGTTCCACCGCCTGCTGGTCTGCGCCCAATAT  
CTTGCTGTACAGGTAATAGGGGTCCCAATCCATCAGGACACCTCCAAAATCAAATACGAT  
TACCTGCGCTTGCTTTTTCATTTTTGTCCATTAGAAACCCAGTAGTCC

>Otu2139

CCAGCCTACGGGTTGCACCAGTAGGGAATATTGCACAATGGGCGAAAGCCTGATGCAGCA  
ACGCCGCGTGACAGATGAAGGTCTTCGGATCGTAAAGTGCTTTTCTGGGAGATGAGAAAG  
GACAGTATCCAGGAATAAGTCTCGGCTAACTACGTGCCAGCAGCCGCGGTAACACGTAG  
GAGACGAGCGTTATCCGGATTTACTGGGCGTAAAGCGCGTGCAGGCGGTTTGGTAAGTTG  
GATGTGAAAGCTCCCGGCTTAAGTGGGAGAGGTCGTTCAATACTGCCAGACTAGAGGATG  
GTAGAGGGAGGTGGAATTTCTGGGTGTAGTGGTGAATGCGTAGATATCCAGAGGAACACC  
AGTGGCGAAAGCGGCCTCCTGGACCATTTCTGACGCTCAGACGCGAAAGCTAGGGTAGCA  
AACGGGATTAGAAACCCGTGTAGTCC

>Otu2140

CCAGCCTATGGGACGCAGCAGGGCCAAGAGCGGAATTATGGCCAAGGTAAGGACCAGCAT  
CAGTTGGAAATCACCGAAATAGGCCGCCATCTCTGCCTGCTCGCCGATCCTGCCATTAAG  
CAAGGCCGTTCCATGTGGGGTCGCCAGTTGCGCGGCAAGCTGTGGCTCTCGGGCAAGAAG  
ATTGTATGGCACTATCTGCTCGATCAGAGCGCTGCGGGCAAGCTGGGTGTTGGAAATCAG  
CAGCGCGTGAACCATGGCTATTCTACACTGCTGCCTAGGTTGCGGATCAAACCTGAACAT  
CGCGGCGCCTTCATTGCGCAAGGTTGTGCGCAGCGTTCCGAACGTCAGGGCTGCCATCGC  
AACCCAGGCTAGACCGACGCCTAAACCCTGGGTGATGCCGACCGAGAACTGGCGCGAC  
GCCCATCTGTAGGTGCAACCAAGTCATCTGAGACAGCGATAGCGCGGTAATTAGATACCC  
CCGTAGTCC

>Otu2144

CCAGCCTATGGGGTGCAGCAGTGGGGAATCTTGACAATGGGCGACAGCCTGATGCAGCA  
ATGCCGCGTGAGGGAAGACGGCCTTCGGGTGTAAACCTCTTTCAGTTGGGATGAAGGTT  
GGACGGTGAATAGCCGCGCCAACCTGACCGTACCTTCAGAAGAAGCTCCGGCTAACTACGT  
GCCAGCAGCCGCGGTAATACGTAGGGAGCAAGCGTTGTCCGGAATCATTGGGCGTAAAGC  
GCGTGTAGGCGGTTCCATAAGTCTGCTGTGAAAGTCGGAGGCTCAACCTTCGAATGCCAG  
TGGATACTGTGGGACTTGAGTACGGAAGAGGAGTGTGGAATTCCTGGTGTAGCGGTGAAA  
TGCGCAGATATCAGGAGGAACACCAACGGCGAAGGCAGCACTCTGGGACGTTACTGACGC

TGAGACGCGAAAAGCGTGGGGAGCAAACAGGATTAGAAAACCCTAGTAGTCC

>Otu2145

CCAGCCTATGGGATGCAGCAGTGGGGAATATTGGACAATGGGGGCAACCCTGATCCAGCA  
ATGCCGCGTGAGTGATGAAGGCCTTAGGGTTGTAAAGCTCTTTCACCCACGACGATGATG  
ACGGTAGTGGGAGAAGAAGCCCCGGCTAACTTCGTGCCAGCAGCCGCGTAATACGAAGG  
GGGCTAGCGTTGCTCGGAATTACTGGGCGTAAAGGGCGCGTAGGCGGACCTGTCAGTTGG  
GTGTGAAAGCCCCGGGGCTCAACCCCGGAATTGCACTCAATACTTCAGGTCTTGAGTACCG  
GAGAGGATGGTGGAATTCCAGTGTAGAGGTGAAATTCGTAGATATTGGGAAGAACACCG  
GTGGCGAAGGCGGCCATCTGGACGGTAACGTGACGCTGAGGCGCGAAAAGCGTGGGGAGCAA  
ACAGGATTAGAAAACCCCGGTAGTCC

>Otu2146

CCAGCCTATGGGGGGCTGCAGTCAAGAACTTCCACAATGGACGAAAGTCTGATGGAGCG  
ACGCCGCGTGGTTGACGAAGTCCTTCGGGACGTAAAAACCTTTTATGGGGGAGGAAGTAA  
TTGACGTTACCCCATGAATAAGAGGCTCCTAACTCTGTGCCAGCAGGAGCGGTAATACAG  
AGGCCTCAAGCATTATCCGGAATCACTGGGCGTAAAGGGTGTGTAGGCGGCGATGTTAGT  
CTCTCGTGAAAGCCCCGTGGGCTCAACCCATGGAACGCGGGGGAAACGGCATCGCTTTGAG  
GACGCGAGAGGTATATGGAACCTCATGGTGTAGGGGTGAAATCCGTTGATATCATGGGGAA  
CACCAAATGCGAAGGCAATATACTGGCGCGCACCTGACGCTGAAACACGAAAGCGTGGA  
ATCGAACGGGATTAGAAAACCCAGTAGTCC

>Otu2148

CCAGCCTACGGGATGCAGCAGTCGAGAATATTCCTCAATGGACGAAAGTCTGAAGGAGCG  
ACGCCGCGTGACTGAAGAAGTCCTTCGGGATGTAAAGGTCTTTTTTCCGGGACGAAATCT  
GACGGTACCGGAAGAATAAGAGGTTGCTAACTCTGTGCCAGCAGCAGCGGTAATACAGAG  
ACCTCGAGCGTTATCCGGATTGATTGGGCGTAAAGCGTGCGCAGGCGGCTTTCTAAGCTC  
ACGGTCAAATCCCGCGGCTCAACCGCGGGACTGCCGCGAAAACCTGGAAGGCTAGAGTACG  
GAAGAGGCTAGCGGAATTGCCGGTGTAACGGTAAAATGTGTTAATATCGGCAAGAACACC  
AGAGGCGAAAGCGGCTAGCTGGTACGTTACTGACGCTGTTGCACGAAAGCGTGGGGAGCG  
AATGGGATTAGAAACCCCTGTAGTCC

>Otu2149

CCAGCCTACGGGGGGCAGCAGTGAGGAATATTGCACAATGGGCGAAAGCCTGATGCAGCA  
ACGCCGCGTGAGGGACGAAGGCCTTCGGGTCGTAAACCTCTTTTCTGAGGGACGAGATCA  
GGACGGTACCTCAGGAATAAGTCTCGGCTAACTACGTGCCAGCAGCCGCGGTAAAACGTA  
GGAGGCGAGCGTTATCCGGATTTACTGGGCGTAAAGCGCACGCAGGCGGCTCCGTTAGTC  
GGACGTGAAAGCTCCTGGCTTAACCTGGGAGAGGCCGTTTCGATACTGCGGGGCTTGAGGTT  
GGGAGAGGGGTGTGGAATTCCCGGTGTAGTGGTGGAAATGCGTAGATATCGGGAGGAACAC  
CAGTGGCGAAGGCGGCACCCCTGGCCACACCTGACGCTGAGGTGCGAAAGCGTGGGTAGC  
AAACAGGATTAGATACCCTAGTAGTCC

>Otu2150

CCAGCCTATGGGTCGCAGCAGGCGCGAAACCTTTACAATGCACGAAAGTGTGATAGGGGG  
ATACTCAGTGCTTACGACTCTGTTGTAGGCTTTTGTCAATCGTAAATAGATCGGCGAATA  
AGTGGTGGGTAAGACTGGTGCCAGCCGCCGCGGTAAACCCAGCGCCACGAGTGGTCATCG  
CGATTATTGGGCCTAAAGCGTTTCGTAGCCGGTTTGGTGCATCTCTTGTGAAATTGTTCCG  
CTTAACCGGACAGCGTGCAAGGAGACACGGCCAAACTCGAGACCGGGAGGCGTCAGAAAGTA  
TGCTGTGGGGACTGGTAAAATGGGATAATCCACAGCAGACTACCGATGGCGAAGGCATCT  
GACGAGAACGGATCTGACGGTGAGGAACGAAAGCCAGGGGAGCGAACCAGATTAGAAACC  
CTAGTAGTCC

>Otu2151

CCAGCCTACGGGACGCTCCAGCCAAGAATCTTCCGCAATGGGGGAAACCTTGACGGAGCG  
ACGCCGCGTGAGGGAAGAAGGTCTTCGGATTGTAAACCTCTCTTTTCAGGGAAGAATAAG  
GTTGACAGGAAATGGTCGACTGATGACGGTACCTGATGAATAAGCCCCGGCTAATTACGT  
GCCAGCAGCCGCGTAATACGTAAGGGGCGAGCGTTGCTCGGAATTACTGGGCGTAAAGG  
GCGTGCAGGCGGCCCTTACAAGTCGAATGTAAAATACCGCAGCTTAACCTGCGGAAATGCGT  
TCGAAACTGTAAAGCTTGAGTCTGGTGGAGGGTGATGGAATTCCTGGTGTAGCGGTGAAA  
TGCGTAGATATCGGGAAGAACACCGAAGGCGAAAGCAGTCATCTATGCCGAGACTGACGC  
TGAGGCGCGAAAAGCATGGGGATCAAACAGGATTAGAAAACCTTGTAGTCC

>Otu2153

CCAGCCTATGGGAGGCAGCAGTGGGGAATATTGCGCAATGGGCGAAAGCCTGACGCAGCG  
ACGCCGCGTGGGTGATGAAGGCCTTCGGGTCGTAAAGCCCTGTCTGGGAGGGACGAAACCT

CGGCGACCTAATATGTGCGCCGACTTGACGGTACCTCCGAAGGAAGCACCGGCTAACTCCG  
TGCCAGCAGCCGCGGTAATACGGAGGGTGCGAGCGTTGTTTCGGGATCACTGGGCGTAAAG  
CGCGTGTAGGCGGCCTTGTAAGTTTGGTGTGAAAGCCCGGGGCTTACCCCCGGAAGTGCA  
CTGGAGACTGCAAGGCTGGAGTACCGGAGAGGAAAGTGGAATTCCTGGTGTAGGAGTGAA  
ATCCGTAGATATCAGGAGGAACACCGGTGGCGAAGGCGGCTACCTGGACCGATATTGACG  
CTGAGACGCGAAAGCGTGGGGAGCAAACAGGATTAGAAACCCAGTAGTCC

>Otu2154

CCAGCCTATGGGGTGCAGCAGTTAGGAATTTTGCACAATGGGGGAAACCCCTGATGCAGCA  
ACGCCGCGTGGGCGAAGAAGGTCTTCGGATCGTAAAGCCCTTTTCTGCGGGAAGAGCAAG  
GACGGTACCGCAGGAATAAGCCTCGGCTAACTACGTGCCAGCAGCCGCGGTAATACGTAG  
GAGGCGAGCGTTGTCCGGATTTATTGGGCGTAAAGAGCGCGTAGGTGGCTCGACAAGTTG  
GGTGTGAAATCCTCTGGCTTAACTGGAGGGGGTCATCCGATACTGTGCGGCTGGAGGCAG  
GCAGAGGAAGGTAGAATTCCCGGTGTAGTGGTGAATGCGTAGATATCGGGAGGAATACC  
AGTGGCGAAGGCGGCCTTCTGGGCCTGTTCTGACGCTGAGGCGCGAAAGCGTGGGGAGCG  
AACCGGATTAGAAACCCGGGTAGTCC

>Otu2159

CCAGCCTATGGGGGGCAGCAGTGGGGAATCTTGCACAATGGGGGAAACCCCTGATGCAGCG  
ACGCCGCGTGAGCGATGAAGCCCTTCGGGGTGTAAGCTCTTTTCGACGGGAACGATAATG  
ACGGTACCTGCAGAAGAAGCTGCGGCTAACTACGTGCCAGCAGCCGCGGTAATACGTAGG  
CAGCGAGCGTTGTTCCGAGTTACTGGGCGTAAAGAGTGCGTAGGCGGTTCTCTAAGTTCG  
GTGTGAAATCTCCCGGCTCAACTGGGAGGGTGCGCCGAAACTGGAGGGCTTGAGTGCGG  
GAGAGGAGAGCGGAATTCCTGGTGTAGCGGTGAATGCGTAGATATCAGGAGGAACACCG  
GTGGTGCAGACGGCTCTCTGGACCGCAACTGACGCTGAGGCACGAAAGCGTGGGGAGCAA  
ACAGGATTAGATACCCTGGTAGTCC

>Otu2163

CCAGCCTATGGGGGGCTGCAGCAAGGAATAGTAGGCAATGGGGGAAACCCCTGACCTCGCG  
ACGCCGCGTGAGGGATGAAGGCTTTCGGGTGTAACCTCTTTTCCCGGGGATGAATAAT  
GACAGTACTCGGGGAATAAGTACGGCTAACTACGTGCCAGCAGCCGCGGTAACACGTAG  
GTGGCGAACGTTATCCGGATTCACTGGGCGTAAAGCGTGCGTAGGCGGTTCTGTTAAGTCG  
GATGTAAATCTCCTGGCTCAACTGGGAGGCACCATCCGATACTGGCGAGCTGGAGTGCA  
TCAGAGGAGAATGGAATTCCCGGTGTAGTGGTGAATGCGTAGATATCGGGAGGGACACC  
AGTGGCGAAAGCGGTTCTCTGGGATGTTACTGACGCTGTTGCACGAAAGCGTGGGGAGCA  
AACAGGATTAGAGACCCCGTAGTCC

>Otu2165

CCAGCCTACGGGGTGCACCAGTGAGGAATATTGGTCAATGGGCGAAAGCCTGAACCAGCC  
ATGCCGCGTGAAGGATGAAGGCGCTATGCGTTGTAACTTCTTTTGTACAGGACGAACCG  
CACGCTCGTGAGCGTGCCTGACAGTACTGTGCGAATAAGCAACGGCTAACTCCGTGCCAG  
CAGCCGCGGTAATACGGAGGTGCAAGCGTTATCCGGATTTATTGGGTTTAAAGGGTGCG  
TAGGCGGAATGATAAGTCAGTGGTGAAGCCTGTAGCTTAACTATAGAATTGCCATTGAT  
ACTGTCGTTCTTGAGTGCAGTTGAGGTAGGCGGAATGTGTAATGTAGCGGTGAAATGCTC  
AGATATTACACAGAACACCAATTGCGTAGGCAGATTACTAACTGTAAGTACGCTGAGG  
CACGAAAGCGTGGGTAGCAAACAGGATTAGAGACCCGCGTAGTCC

>Otu2175

CCAGCCTACGGGGTGCTGCAGTGAGGAATTTTGGGCAATGAACGCAAGTTTGACCCATTA  
ATAATTAATGAGTGAGAAACGGACAGTACCAGCATCGTAAACTCTTTTACCAAAAAAGA  
TAATGACCGTATTTGGAGAATAAACACCGGCTAATTCTGTGCCAGCAGCCGCGGTAACAC  
AGGTAGTGTTAACGTTATTCATCATAATTGGGTGTAAAGGATATGTAGGCGGTTTATGTA  
AGATTTTTTGTAAAATTCATTGGTATGACCCAGATGGTTGACAAAAAATACCTAAAAACT  
ATGAGTTTAATTTAAGTTAAAAGAATTTCTAAAGTAAAAAGTCTAAAATCTCTAGAGAT  
TAGAACGACTGCCAGATTAGTTACGGAAGTATTTTCTTAATTAACTGACGCTGAGATA  
TGAAAGTGTAGGGATCAAACAGGATTAGAAACCCCTGTAGTCC

>Otu2177

CCAGCCTATGGGGGGCAGCAGTCGGGAAACTTTTGCAATACACGAAAGTGTGACAAAGCA  
AGCCAGAGTGATTTTCTATAATTGAAAATCTTTTGTGGGATGTAAAAAGTCTCACGAATA  
AGGACTGGGCAAGACTGGTGCCAGCCGCCGCGGTAATCCAGCAGTCCAAGTCGCAGCCA  
CATTTGTTGGGTCTAAAATATCCGTAGCTTGCTTTTCAAGTCTCTTGTGAAATCGGGACT  
CTTAAGGTTCCGGCGGGCAAGAGATACTGTTAAGCTAGAGACCGGGAGGCGTAAGAAGTA  
CATTTAGGGTAACGGTAAAATGTGTTGATCCCAAATGGACTAACAGTCGCGAAGGCGTCT

TACGAGAACGGTTCTGACAGTGAGGGATGAAGGCTAGGGGCGCAAAGTGGATTAGAAACC  
CTTGTAGTCC  
>Otu2183  
CCAGCCTACGGGGGGCACCAGCGGGGAATCTTGCACAATGGGGGAAACCCTGATGCAGCG  
ACGCCGCGTGAGCGATGAAGCCCTTCGGGGTGTAAGCTCTTTTCGACGGGGAAGATTATG  
ACGGTACCCGGAGAAGAAGCTGCGGCTAACTACGTGCCAGCAGCCGCGGTAATACGTAGG  
CAGCAAGCGTTGTTTCGGAATTACTGGGCGTAAAGAGTGCGTAGGTGGTTGGCTAAGTTTG  
GTGTGAAATCTCCTGGCTTAACTGGGAGGGTGCGCCGAAAACCTGGTCGACTAGAGTGTGG  
GAGAGGGACGTGGAATTCCTGGTGTAGCGGTGAAATGCGTAGATATCAGGAGGAACACCT  
GCGGTGTAGACGGCGTCCTGGACCATGACTGACACTGAGGCACGAAAGCGTGGGGAGCAA  
ACAGGATTAGAAACCCGAGTAGTCC  
>Otu2184  
CAGCCTATGGGAGGCACCAGTCGAGGAAATTTTTCAATGCCCCGAAAGGGTGAACGAGTAA  
GTCAGAGTGTTTTCTTTACGAAAACCTTTTGTCTGTTGTAAAAAGACAGACGAATAAGGAC  
TGGGCAAGACCGGTGCCAGCCGCCGCGGTAATCCCGGCGGTCCAAGTCGCATCCACAATT  
ATTGGGTCTAAAACATCCGTAGCTTGTTTTTGTAAAGTCTCTTGTGAAATTTTCATATCTCAA  
ATATGAAGCGTGCAAGAGATACTACATTGCTAGAGACCGGAAGACGCGAAGAGTACGACG  
GAGGTAGCGGTAAAATGTGTTAATCTCTGTGCGACTAACAATGGCGAAGGCACTTTGCGA  
GTACGGATCTGACAGTGAGGGATGAAGGCTAGGGGCGCAAAGGGATTAGAAACCCCCGT  
AGTCC  
>Otu2185  
CCAGCCTATGGGAGGCAGCAGCTAAGAATCTTCGGCAATGGGCGCAAGCCTGACCGAGCG  
ACGCCGCGTGAGGATGAAGGCCCTTCGGGTGTAAACTCCTGTGAGGGGGAGGAAGGGG  
CAACCTTGACCGACCCCTGGAGGAAGCACGGGCTAAGTTCGTGCCAGCAGCCGCGGTAAAG  
ACGAACCGTGCGAACGTTATTCGGAATTACTGGGCTTAAAGCGCGTGTTAGGCGGATGGGA  
ACGTCGGTCTTTGAAAGCCCCGGCTCAACCGGGGAAGCGGAGCCGAAACGACCGATCTG  
GAGGGACGTAGGGGGACCTGGAACCTCCGGTGGAGCGGTGAAATGCGTTGAGATCGGAAG  
GAACGCCCGTGGCGAAAGCGAGGTCTCGGACGTCTGCTGACGCTGAGACGCGAAAGCTAG  
GGGAGCAAACGGGATTAGAAACCCCGGTAGTCC  
>Otu2188  
CCAGCCTATGGGGGGCTGCAGTCGAGAATCTTTCACAATGGGCGAAAGCCTGATGGAGCG  
ACGCCGCGTGAGGGATGAATGGCTTCGGCCCGTAAACCCCTGTCATTTCGGGAGCAAGGCG  
TTTGACCTAACACGTCAAATGTTGATAGTACCGGAAGAGGAAGGGACGGCTAACTCTGTG  
CCAGCAGCCGCGGTAATACAGAGGTCCCAAGCGTTGTTTCGGATTCACTGGGCGTAAAGGG  
TGCGTAGGCGGCCGGGCAAGTCCGGTGTGAAATCTCGGAGCTTAACTCCGAAACGGCACT  
GGATACTTTCCGGCTCGAGGTGGGAGGGGGGACTGGAATTCCTCGGTGTAGCAGTGAAAT  
GCGTAGATATCGAGAGGAACACCAGTGGCGAAGGCGAGTCCCTGGACCAATCCTGACGCT  
GAGGCACGAAAGCCAGGGGAGCAAACGGGATTAGAAACCCTTGTTAGTCC  
>Otu2189  
CCAGCCTACGGGTGGCTGCAGTAGGGAATATTGGGCAATGGAGGCAACTCTGACCCAGCC  
ATGCCGCGTGACAGGATGAAGGCCCTCTGGGTGTAAACTGCTTTTATCAGGGAAGAAACG  
CTTGATTTCATCTGAGCCTGACGGTACCTGAGGAATAAGCACCGGCTAACTCCGTGCCAG  
CAGCCGCGGTAATACGAGGGTGCAAGCGTTATCCGGATTTACTGGGTTTAAAGGGTGCG  
TAGGCGGGTTATTAAGTCAGTGGTGAAAGATTTGGGCTCAACCCAAAAATTGCCATTGAT  
ACTGGTAGCCTCGAGTACAGTTGAGGTGGGCGGAATGTGTCATGTAGCGGTGAAATGCAT  
AGATATGACACAGAACACCAATTGCGAAGGCAGCTCGCTAAACTGTAAGTACGCTGAGG  
CACGAAAGCGTGGGTAGCAAACAGGATTAGAAACCCAGTAGTCC  
>Otu2192  
CCAGCCTACGGGTGGCAGCAGTGGGGAATTTTACGCAATGGGCGAAAGCCTGACGTAGCG  
ACACCGCGTGACGAAGAAGCCCTTTTGGGGTGTAAGTTCTGTGCGCTGGGAAGAAAAAA  
ATGACGGTACCAGCAAAGGAAGCATCGGCTAACTACGTGCCAGCAGCCGCGGTAAGACGT  
AGGATGCAAGCGTTGTCCGGATTTATTGGGCGTAAAGAGTTCGTAGGCGGTCTGTTAAGT  
CTGATGTTAAAGATCGGGGCTCAACCCCGGGAGTGCATTGGATACTGGCAGGCTGGAGTG  
CGGTAGAGGCGAGTGGAATTCACAGTGTAGCGGTGAAATGCGTAGATATTGGGAAGAAACA  
CCAGTGGCGTAGGCGACTCGCTGGGCCGTAACTGACGCTGAGGAACGAAAGCCAGGGGAG  
CAAACAGGATTAGATACCCTAGTAGTCC  
>Otu2193  
CCAGCCTACGGGGTGACACCAGTCGAGGATCTTTAGCAATGCCCCGAAAGGGTGACTATGCG

ACGCCGCGTGCGGGATGAAGGCCTTCGGGTCGTAAACCGCTGTCAGGGAGGAAGAAATCT  
CATACGTGAATATCGTATGAGTTTGACATCACTCCCAAAGGAAGCCACGGCTAACTCTGT  
GCCAGCAGCCGCGGTAAGACAGAGGCGGCAAGCGTTGTTTCGGATTTATTGGGTGTAAAGG  
GCAGGTAGGTGGCCTTGCAAGTCCGGTGTGAAATCCCACGGCTCAACCGTGGAAGTGCAT  
TGGATACTGCTTGGCTTGAGTATCGGAGAGGTGAGGGGAATTCCTGGTGTAAAGGGTGAAA  
TCTGTAGATATTGGGAGGAATACCAGTGGCGAAGGCGCCTCACTGGCCGTTTACTGACAC  
TGAGCTGCGAAAGCTAGGGGAGCAAACAGGATTAGAAACCCCTGTAGTCC

>Otu2195

CCAGCCTATGGGGGGCAGCAGCAAGGAATTTTGCGCAATGGGGGAAACCCCTGACGCAGCG  
ATGCCGCGTGAGGACGAAGGTCTTCGGATTGTAACTCCTTTTTCGGGGGAAAAATGTC  
GGCGTGAATAACGTCAATGATGGTACTCCGCGAATAAGCCACGGCTAACTTCGTGCCAG  
CAGCCGCGGTAAGACGAAGGTGGCGAGCGTTACTCGGAATTACTAGGCGTAAAGCGCGAG  
CAGGCGGTTTCGGTAAGTCCGTCGTGAAAGCCCCGGGCTCAACCCGGGGAGGCCGACGGAT  
ACTGCCGGAAGTGAATGTGGGAGAGGGGACTGGAATTCCTGGTGTAGCGGTGAAATGCGT  
AGATATCAGGAGGAACACCAAAGGCGAAGGCAGGTCCCTGGACCATTATTGACGCTGAGT  
CGCGAAAGCCGGGGGAGCAAACAGGATTAGATACCCGCGTAGTCC

>Otu2198

CCAGCCTACGGGGTGCACCAGTGGGGAATATTGGACAATGAGCGAAAGCTTGATCCAGTA  
ATAATTCGTGAGTGAGAAAAGGAAAGCAGTAACGCTGTAAACTCAAAAAATAAAAAAAT  
AATGATATTTTTTATGAAAAGCACTGGCTAATTCTGTGCCAGCAGCCGCGGTAAGACAGG  
TAGTGCGGACGTTATTCATTTTAATTAGGTGTAAAGGATATGTAGGTTGCTTTTTTTGAAT  
GTTTTTAAAAATTTCTGAGCGTGATCCTTAGAGTTAAAAAGCATATTTAAAGCTCGAGT  
ATTTAAACGTTAAAGAATTTCTTTGTAAAGGTAGAATTTCTAAATAATTAAAGACT  
ACCAAAAAAATTGTGAAAACATTCCTTCGATTAATAACTGACGCTGAGATATGAAAGTATA  
AGTATCAAATAGGATTAGAAACCCCTGTAGTCC

>Otu2199

CCAGCCTATGGGAGGCACCAGTGGGGAATCTTGCGCAATGGGCGAAAGCCTGACGCAGCG  
ACGCCGCGTGGGTGATGAAGGCCTTCGGGTCGTAAAGCCCTGTCAAGAGGGACGAATCCT  
CGTCGACCTAACACGTCGGCGACCTGACGGTACCTCTGAAGGAAGCACCGGCTAACTCCG  
TGCCAGCAGCCGCGGTAATACGGAGGGTGCGAGCGTTGTTTCGGAATTACTGGGCGTAAAG  
CGCGTGTAGGCGGCCTTCTAAGTCTGGTGTGAAAGCCCGGGGCTCACCCCCGGAAGTGCA  
TTGGATACTGGGAGGCTGGAGTACCGGAGAGGAGGGTGAATTCCTGGTGTAGCGGTGAA  
ATGCGTAGATATCAGGAGGAACACCGGTGGCGAAGGCGGCCCTCTGGACGGATACTGACG  
CTGAGACGCGAAAGCGTGGGGAGCAAACAGGATTAGAAACCCGAGTAGTCC

>Otu2201

CAGCCTATGGGTGGCTGCAGTCGAGAATCTTCGGCAATGGGCGCAAGCCTGACCGAGCGA  
CGCCGCGTGTGGGATGAAGGCCTTCGGGTGTAAACCACTGTGAGAGGGGAGGAAATATG  
TGGGGTACTCTCCCATGTTTGACCTAGCCTCAGAGGAAGGACGGGCTAAGTTCGTGCCA  
GCAGCCGCGGTAAGACGAACCGTCCAAACGTTATTCGGAATTACTGGGCTTAAAGGGTGC  
GTAGGCGGCGCGGAAAGTAGGGTGTGAAATCCCTCGGCTTAACCGAGGAACTGCGTCCTA  
AACTACCGTGCTCGAGGGAGATAGAGGTGAGCGGAACTTAGGGTGGAGCGGTGAAATGCG  
TTGATATCCTAAGGAACACCGGTGGCGAAAGCGGCTCACTGGCCCGATACTGACGCTGAG  
GCACGAAAGCGTGGGGAGCAAACAGGATTAGAAACCCCTCGTAGTCC

>Otu2202

CCAGCCTATGGGGGGCAGCAGTGGGGAATTTTGGACAATGGGGGCAACCCCTGATCCAGCC  
ATGCCGCGTGTGGGAAGAAGGCCTTCGGGTGTAAACCACTTTTGTGAGGGAAGAAATG  
GCCAGGTAAACACCTTGGCTAGATGACGGTACCTGGAGAATAAGCACCGGCTAACTACGT  
GCCAGCAGCCGCGGTAATACGTAGGGTGAAGCGTTAATCGGAATTACTGGGCGTAAAGC  
GTGCGCAGGCGGTTTCGCAAGTCAGATGTGAAAGCCCCGGGCTCAACCTGGGAATTGCAT  
TTGAAACTACGAGGCTAGAGTGTGTCAGAGGGGGGTAGAATTCACGTGTAGCAGTGAAA  
TGCGTAGAGATGTGGAGGAATACCGATGGCGAAGGCAGCCCCCTGGGCTAAGATTGACGC  
TCATGCACGAAAGCGTGGGGAGCAAACAGGATTAGAAACCCAGTAGTCC

>Otu2203

CCAGCCTACGGGAGGCAGCAGTCGAGAATCTTTCGCAATGGGCGCAAGCCTGACGAAGCG  
ACGCCGTGTGAGCGAAGAAGGCCTTCGGGTGTAAAGCTCTTTCGCTAGGGAACAAGAGA  
GATAGGATAACACCCTATTGATTTGATGGTACTTGGTAAAGAAGCACCGGCTAACTCCGT  
GCCAGCAGCTGCGGTAATACGGAGGGTGAAGCATTGATCGGAATTACTGGGCGTAAAGG  
GCGCGTAGGCGGTGAAATAAGTCGGATGTGAAATTCGGGGGCTCAACCCCGGAGCTGCAT

TTGAAACTGTTTCGCTAGAGTTCAGTTAGGGTAAACGGAATTCCACGTGTAGCGGTGAAA  
TGCGTAGATATGTGGAAGAACACCGGTGGTGAAGACGGTTTACTGGGCTGAAACTGACGC  
TGAGGCGCGAAAGCATGGGGAGCAAACAGGATTAGAGACCCAGTAGTCC

>Otu2207

CCAGCCTATGGGTGGCTGCAGACGAGAATATTCCGCAATGGGCGAAAGCCTGACGGAGCG  
ACGCCGCGTGATGGATGAAGTGCTTTGGTACGTAAACATCTTTTATCGGGGACGAAGTTT  
ATTGACGGTACCCGATGAATAAGGGGCTCCTAACTCTGTGCCAGCAGGAGCGGTAATACA  
GAGGCCCCAAGCATTACCCGGAATTACTGGGCGTAAAGAGTGTTCGAGGCGGCCATATTAG  
TCGTTTCGTTAAATCCGCGGGCTCAACCTGCGGTCTGCGAGCGAAACGGTATGGCTTCGAG  
GGCGCGAGAGGTGCACGGAACCATGGTGGAGGGGTGAAATCCGTTGATATCATGGGGAA  
CACCAAAGGCGAAGGCAGTGCACCTGGTTCCTGACGCTTAAACACGAAAGCCAGGGG  
AGCGAACGGGATTAGATACCCGAGTAGTCC

>Otu2208

CCAGCCTATGGGTTCGCTGCAGGCGCGAAAACTCCACAATGTACGAAAGTACGATGGGGGA  
ATCCTAAGTGCTTACACACAGTGTAGGCTTTTTTTCGAAAGCAAAAATTTTCGGAGAATAAG  
TGGTGGGCAAGACTGGTGGCAGCCGCCGCGGTAAACACCAGCGCCACTAGTGGGAGCCGTA  
GTTATTGGGCCTAAAGCGTCCGTAGCCGGTCAGGTAAATCTTTTGTGAAATCGTTGGGCT  
TAACTTAACGACGTGCAGAAGACACTGCCAGACTTGGAATTGGGAAGAGTCAGAGGTATT  
TCTGGGGGAGCGGTAAAATGTGGTAATCCCGGAAGGACCACCGGTGGCGAAGGCGTCTGA  
CTAGAACAACCTCGACGGTGAGGGACGAAAGCCAGGGGAGCGATCCGGATTAGATACCC  
CGTAGTCC

>Otu2209

CCAGCCTATGGGTTCGCTCCAGTGGGGAATCTTGCGCAATGGAGGAACTCTGACGCAGCG  
ACGCCGCGTGTCGATGAAGGCTTTCGGATCGTAAAGCACTGTTCGCGAGGGGAAAACAAAC  
GATGGTACCTCGAGAGGAAGCACCGGCTAACTCTGTGCCAGCAGCCGCGGTAATACAGAG  
GGTTCGAGCGTTGTTTCGGAATTATTGGGCGTAAAGCGCTGGTAGGCGGCCCGACAAGTCG  
CGTGTGAAAGCTCCCGGCTCAACCGGGAAAGTGCGCGCGAAACTGGCGGGCTTGAGTGTC  
GGAGAGGGTTCGCGGAATTCCCGGTGTAGAGGTGAAATTTCGTAGATATCGGGAGGAACACC  
AGAGGCGAAGGCGCGACCTGGAAGACGACCGACGCTGAGCAGCGAAAGCCAGGGGAGCA  
AACGGGATTAGAAACCCCCGTAGTCC

>Otu2210

CCAGCCTATGGGGTGCAGCAGTAACGAATATTCCGCAATGGGCGAAAGCCTGACGGAGCG  
ACGCCGCGTGAGGAGCAATTCCTTCGGGATGTAAACTCCTTTTAGGTGTAAGAAAACGA  
AGCGCGCTAACATCGCGCCAGTTGATCTATGCCAGAAAAAGCATCGGCTAACCCCGTGCC  
AGCAGCCGCGGTAATACGGGAGATGCAAGCGTTGTTTCGGAATCACTGGGCTTAAAGCGCG  
TGTAGGCGGCTTGTAAGTACTTTGTGAAATCCCTCGGCTCAACCGAGGACCTGCAAGGT  
ATACTGCCGAGCTTGAGGCAGGTAGGGGTCACTGGAACCTTAGGTGGAGCGGTGAAATGC  
GTAGATATCTAGAGGAACGCCCGTGGCGAAAGCGGGTGAAGGGCCTGCCCTGACGCTGA  
GACGCGAAAGCGTGGGTAGCAAACGGGATTAGAAACCCGGGTAGTCC

>Otu2212

CCAGCCTATGGGGCGCTCCAGTGAGGAATTTTGCGCAATGGCCGCAAGGCTGACGCAGCA  
ACGCCGCGTGGGTGAAGAAGGCCTTCGGGTCGTAAAGCCCTGTCAGGTGGGAAGAAAGGC  
TTGATTGCTAATATCGATTGAGTTTGACGGTACCACCAGAGGAAGCACCGGCTAACTCCG  
TGCCAGCAGCCGCGGTAATACGGAGGGTGCAGCGGTTATTCGGAATTATTGGGCGTAAAG  
CGCGTGTAGGCGGGGATACAAGTCTGATGTGAAAGCCCTGGGCTTAACCTGGGAAGTGCA  
TTGGAAACTGTATTTCTTGAGTACTGGAGAGGAAGGGGGAATTCCCGGTGTAGAGGTGAA  
ATTCGTAGAGATCGGGAGGAATACCAGTGGCGTAGGCGCCTTTCTGGACGGTTACTGACG  
CTGAGACGCGAAAGCGTGGGGAGCAAACAGGATTAGAGACCCCGTAGTCC

>Otu2217

CCAGCCTATGGGGTGCAGCAGTCGAGGATCTTCGGCAATGGGCGCAAGCCTGACCGAGCG  
ACGCCGCGTGTCGATGAAGGCCTTCGGGTGTAAAGCACTGTTCGAGGGGGAGGAAGGCG  
AAAGCTTGACCTATCCCTGGAGGAAGCACGGGCTAAGTTCGTGCCAGCAGCCGCGGTAAG  
ACGAACCGTGCGAACGTTATTCGGAATCACTGGGCTTAAAGGGCGCGTAGGCGGGCGATC  
AAGTCCGAGGTGAAATCCTCCAGCTTAACTGGAGAAGTGCCCCGATACTGGTCGTCTCG  
AGGAGGGTAGGGGCATCTGGAAC TAGCGGTGGAGCGGTGAAATGCGTTGATATCGCTAGG  
AACTCCGATGGCGAAGGCAAGGTGCTGGACCCCTTTCTGACGCTGAGGCGCGAAAGCCAGG  
GGAGCGAACGGGATTAGATACCCCTGTAGTCC

>Otu2222



CCAGCCTATGGGTTGCAGCAGTGGGGAATTTTGCACAATGCCCCGAAAGGGTGATGCAGCA  
ACGCCGCGTGAGGGATGAAGGCCTTCGGGTCTGTAACCTCTTTTCGATCGGGAAAAACGGC  
CCTGCGAAGATCGGGGTCTGATGGTACCGGAAGAAGAAGCCCCGGCCAACCTACGTGCCAG  
CAGCCGCGGTAATACGTAGGGGGCGAGCGTTGTTTCGGAATTACTGGGCGTAAAGGGCGTG  
TAGGCGGTGTGTAAGTTGGGCGTGAAATCCCCGGGCTTAACCCGGGGGGTCAATTCAAGA  
CTGCCACGCTAGGGTGCGGGAGAGGGCAGTGGAATTCCCGGTGTAGCGGTGAAATGCGTA  
GATATCGGGAGGAACACCTGCGGCGAAGGCGGCTGCCTGGGCCGTAAACCGACGCTGAGGC  
GCGAAAGCTAGGGGAGCAAACAGGATTAGATACCCCGGTAGTCC

>Otu2225

CCAGCCTATGGGGGGCTGCAGTGGGGAATCTTGCGCAATGGACGAAAGTCTGACGCAGCC  
ACGCCGCGTGAGTGAAGAAGGCCTTCGGGTGTAAAGCTCTGTCTGCGGGACGAATCTC  
GTATGGGTGAATAGCCCATACGACTGACGGTACCGCAAAAGGAAGCACCGGCTAACTTCG  
TGCCAGCAGCCGCGGTAATACGAGGGGTGCAAGCGTTGCTCGGAATTATTGGGCGTAAAG  
GGTAGGTAGGTGGTCTCATTTGTCTGGGGTGAAAGCCTTGAGCTTAACTCAAGAAGTGCC  
CCGGAACCGTGAGACTGGAGTCTTGAGAGGGTCTGTGAATTCCCGGTGTAGCGGTGAA  
ATGCGTAGAGATCGGGAGGAACACCAGAGGCGAAGGCGGCGACCTGGACAAGTACTGACA  
CTCAACTACGAAAGCGTGGGGAGCAAACAGGATTAGAAACCCTTGTAGTCC

>Otu2226

CCAGCCTACGGGACGCAGCAGTGGGGAATTTTGGACAATGGGGGAAACCCTGATCCAGCA  
ACTCTGCGTGAGGACGAAGTCTCTCGGGATGTAAACTCCTTTTCCAGGGGACGAATAGG  
CGCAAGCCTTTGACGGTACTCTGGGAATAAGCAACGGCTAACTACGTGCCAGCAGCCGCG  
GTAAGACGTAGGTTGCGAGCGTTATTCGGATTCACTAGGCGTAAAGCGTGTGTAGGTGGA  
TGGCTAAGTCTGTTGTGAAATCTCCTGGCTCAACTGGGAGAGGTCAATAGATACTGGCTG  
TCTTGAGTTGGGTAGGGGGAACCGGAATTCCAGGTGTAGCGGTGAAATGCGCAGATATCT  
GGAGGAACACCGGCGGCGAAGGCGGGTTCTGGGCCTTAACTGACACTGAGACACGAAAG  
CTAGGGGAGCAAACAGGATTAGATACCCCTGTAGTCC

>Otu2232

CCAGCCTATGGGAGGCAGCAGTGGGGAATCTTGTGCAATGGGCGAAAGCCTGACGCAGCG  
ACGCCGCGTGGGTGATGAAGGCCTTCGGGTGTAAAGCCCTTTGGGTGGAGACGAATAAG  
TCGTAGCTAACACCTACGATGATGACGGTATCCACATAACAAGCACCGGCTAACTCTGTG  
CCAGCAGCCGCGGTAAGACAGAGGGTGCAAACGTTGTTTCGGAATTACTGGGCGTAAAGCG  
CATGTAGGCGGCCAAGCAGGTCGGATGTGAAATCCCTCGGCTCAACCAAGGAAGTGCAAT  
CGAAACCGCATGGCTAGAGTCCCGGAGAGGAAGGTGGAATTCTCGGTGTAGAGGTGAAAT  
TCGTAGATATCGAGAGGAACACCTGTGGCGAAAGCGGCCTTCTGGACGAGGACTGACGCT  
GAGATGCGAAAGCGTGGGGAGCAAACAGGATTAGATACCCTTGTAGTCC

>Otu2233

CCAGCCTATGGGGTGCTGCAGTGGGGAATTTTCCGCAACGGGCGAAAGCCTGACGGAGCA  
ATACCGCGTGAGGGAGGAAGGCTCTTGGGTGTAAACCTCTTTTCTCAGGGAATAAGAAA  
GTGAAGGTACCTGAGGAAGAAGCATCGGCTAACTCCGTGCCAGCAGCCGCGGTAATACGG  
AGGATGCAAGCGTTATCCGGAATGATTGGGCGTAAAGGGTCCGCAGGTGGAAATGAAAGT  
CTGCTGTTAAAGAGTTCTGCTCAACAGAATAAAGGCGGTGGAACTACATACTAGAGTA  
CGTTCGGGGCAGAGGGAATTCTTGGTGTAGCGGTGAAATGCGTAGATATCAGGAAGAACA  
CCGGTGGCGAAGGCGCTCTGCTAGGCCGTGACTGACACTGAGGGACGAAAGCTAGGGGAG  
CGAATGGGATTAGATACCCGGGTAGTCC

>Otu2236

CCAGCCTATGGGGGGCAGCAGTCGAGAATCTTCCGCAATGGGCGAAAGCCTGACGGAGCG  
ACGCCGCGTGATTGATGAAGTCCTTCGGGACGTAAAGATCTTTTATGCGTGAGAAAGTTA  
TTGATGTTAGCGCATGAATAAGGGGCTCCTAACTCTGTGCCAGCAGGAGCGGTAATACAG  
AGGCCCCAAGCATTATCCGGAATCACTGGGCGTAAAGGGTGTGTAGGCGGCGTTGTTAGT  
CTTTCGTGAAGGGTCTCTGGCTTAACTAGGGAACCGCGGAGGAAACGGCAATGCTTCGAG  
GACGTGAGAGGTATATGGAACCAAGGTGTAGGGGTGAAATCCGTTGATATCTTGGGGAA  
CACCGAATGCGAAGGCAATATACTGGCGCGCTCCTGACGCTGAAACACGAAAGCGTGGGA  
ATCGAACGGGATTAGATACCCTGGTAGTCC

>Otu2237

CCAGCCTATGGGTGGCAGCAGTTGGGGATTTTGCACAATGGGCGCAAGCCTGATGCAGCA  
ACACTGCGTGAAAGGATGAAGGTTTTCGGATCGTAACCTTCTTTTATGAGGGAATAATCTT  
GAAGGTACCTCATGAATAAGCACCGGCTAACTACGTGCCTGCAGCCGCGGTAATACGTAG  
GGTGCAAACGTTATCCGGAATTTATTGGGCGTAAAGAGCTCGTAGGCGGAATTGTAAGTTG

GATATTAAAGACTCAGGCTCAACTTGGGGAAAAGTATCCAAAAGTGC AAAATCTAGAGTGAT  
GCAGGGGAGAACGGAACCTTACAGTGTAGCGGTGGAATGCGTAGATATTGTAAGGAACGCC  
AATGGTGAAGACAGTTCTCTGGGCATTTTCTGACGCTGAGGAGCGAAAGCGTGGGTAGCG  
ATCGGGATTAGAAACCCGAGTAGTCC

>Otu2242

CCAGCCTACGGGGGGCAGCAGTGGGGAATATTCCGCAATGGGCGCAAGCCTGACGGAGCG  
ACGCCGCGTGGATGATGACAGTCTTCGGATTGTAAAGTCCTGTAGAGGGGGAAGAAGGGT  
GCGCAAGCACTTGACAGTACTCCTAAAGTAAGCTACGGCAAACCTCTGTGCCAGCAGCCGC  
GGTAATACAGAGGTAGCAAGCGTTGTTTCGGAATGACTGGGTGTAAAGCGCGTGTAGGCGG  
TCTTTTAAAGTTGAATGTGAAATCTCCGGGCTTAACCCGGAACGGCATTCAATACTGATT  
GACTTGAGTGCGAAAGAGGAAAGTGGAATTTTCGGGTGTAGCGGTGAAATGCGTAGATATC  
CGAAGGAACACCGGTGGCGAAGGCGACTTTCTGGTTTCGCAACTGACGCTGAGACGCGAAA  
GCTAGGGGAGCAAACAGGATTAGAAACCCGCGTAGTCC

>Otu2247

CCAGCCTACGGGAGGCAGCAGTCGAGAATATTTCGACAATGGGCGAAAGCCTGATCGAGCG  
ACGCCGCGTGCAGGATGAAGCTCTTCGGAGTGTAAACTGCTTTTATGTTCTAGAAAGTTA  
TTGATCGGAACATGAATAAGGAGCTGCAAACCTTCGTGCCAGCAGCCGCGGTAATACGAAG  
GCTCCAAGCGTTATCCGGATTTATTGGGCGTAAAGGGCGCGTAGGGGGTTCCATGTGTTT  
CTGGTTAAAGACCGAAGCTTAACCTTCGGAGTTGCCAGGAAAACCTATGAAACTTGAGGGTG  
TTAGAGGTGAGTAGAACGCACGGTGTAGGGGTGAAATCCGTTGATATCGTGCGGAATACC  
AAAGGCGAAGGCAGCTCACTGGGACATTCTTGACCCTGAGGCGCGAAAGCGTGGGGAGCA  
AAAAGGATTAGATACCCCTGTAGTCC

>Otu2248

CCAGCCTATGGGGGGCAGCAGTGGGGAATATTGGACAATGGGCGCAAGCCTGATCCAGCA  
ATACCGCGTGTGTGAAGAAGGCCTTAGGGTTGTAAAGCACTTTCAGTAGCTAAGAAATAC  
TCAAGATTAATATCCTTGAGAGTTGACGTAAACTACGGAAGAAGCACCCGGCTAACTCTGT  
GCCAGCAGCCGCGGTAATACAGAGGGTGCAAGCGTTAATCGGAATTACTGGGCGTAGAGC  
GCACGTAGGTGGGTGCTTAAAGTCGAATGTGAAACCCCCGAGCTCAACTTGGGGACTGCAT  
GCGATACTGAACACCTAGAGTATAGTAGAGGGAAGTGGAATTTCCGGAGTAGCGGTGAAA  
TGCGTAGATATCGGAAGGAACACCAAGTGGCGAAGGCGGCTTCCTGGGCTAATACTGACAC  
TGAGGTGCGAAAGCGCGGGGAGCAAACAGGATTAGATACCCCTGTAGTCC

>Otu2250

CCAGCCTATGGGAGGCTCCAGTAGGGAATCTTGCGCAATGGGCGAAAGCCTGACGCAGCA  
ACGCCGCGTGGGGGATGAATGCCTTCGGGTGTAAACCCCTTTCAGTGGGAACGAAATTG  
ACGGTACCCACAAAAGAAGCCCCGGCCAACTACGTGCCAGCAGCCGCGGTGATACGTAGG  
GGGCGAGCGTTGTCCGGATTTATTGGGCGTAAAGAGCTCGTAGGCGGCTTAGTAAGTCGG  
CGTGTTAAACCTCCAGGCTCAACCTGGAGTCGCACCCGATACTGCTATGGCTAGAGTCCG  
GTAGGGGGTACGGAATTCTTGGTGTAGCGGTGAAATGCGCAGATATCAGGAGGAACACC  
AGTGGCGAAGGCGGTGGCCTGGGCCGGTACTGACGCTGAGGAGCGAAAGCGTGGGGAGCG  
AACAGGATTAGAAACCCCTGTAGTCC

>Otu2251

CCAGCCTACGGGGCGCAGCAGTGAGGGATATTTCGACAATGGGGGAAACCCCTGATCGAGCG  
ACGCCGCGTGCAGGAAGAAGCTTTTTCGGAGCGTAAACTGCTTTTCTGTGAGACGAGAGAG  
GACGGTATCACAGGAATAAGTCACGGCTAACTACGTGCCAGCAGCCGCGGTAATACGTA  
GGTGGCAAGCGTTGTCCGGAGTTACTGGGCGTAAAGGGTGAGTAGGCGGGATGTTGCGTC  
CCTAGTGAAATCTCCTGGCTTAACTGGGAGGGGTTTAGGGATACGGGCATTCTTGAGGTA  
TGGAGAGGAAAGCAGAATTCTTGGTGTAAACAGTGAAATGTGTAGATATCAGGAGGAATAC  
CGGAGGGGAAGCCGGCTTTCTGGCCACGACCTGACGCTGATGCACGAAAGCTTGGGGAGC  
AAACAGGATTAGAAACCCCTCGTAGTCC

>Otu2253

CCAGCCTACGGGTGGCTGCAGCAAGGAATATTGTACAATGGGCGAAAGCCTGATACAGCG  
ACGCCGCGTGAGGGATGAAGATTCTCGGATTGTAAACCTCTTTTCTCAGGGACGAACAAT  
GACGGTACCTGGGGAATAAGTCACGGCTAACTACGTGCCAGCAGCCGCGGTAATACGTAG  
GTGGCTAGCGTTATCCGGATTTATTGGGCGTAAAGAGAGCGTAGGTGGTTTGGCAAGTCG  
GATGTAAAATCTCCCGGCTTAACTGGGAGGGATCATTCGATACTGTTAGACTGGAGTGCA  
GCAGAGGGAGTTGGAATTCCCGGTGTAGTGGTGAAATGCGTAGATATCGGGAGGAACACC  
AGTGGCGAAGGCGAGCTCCTGGGCTGCTACTGACACTGAGGCTCGAAAGCGTGGGGAGCG  
AACAGGATTAGAAACCCCTGGTAGTCC

>Otu2256

CCAGCCTACGGGGTGCTCCAGCAAGGAATTTTGCGCAATGGGCGAAAGCCTGACGCAGCA  
ACACCGCGTGAGGGAAGAAGGCCCTCGGGTTGTAAACCTCTTTTGTGTCAGGGAAGAATAAT  
GACGGTACCTGGCGAATAAGTCACGGCTAACTACGTGCCAGCAGCTGCGGTAATACGTAG  
GTGGCAAGCGTTATCCGGATTCACTGGGCGTAAAGAGCGCGTAGGTGGTCCTTCAAGTCA  
GATGTTAAATTTTCCGGCTCAACTGGAAAATGTCATTTGATACTGCTGGACTTGAGGGTG  
GTAGAAGGAGGTGGAATTCCCGGTGTAGTGGTGAAATGCGTAGATATCGGGAGGAACACC  
AGTGCGCAAAGCGGCCTCCTAGGCCATTCTTGACACTGAGGCGCGAAAGCGTGGGGAGCG  
AACAGGATTAGAAACCCTAGTAGTCC

>Otu2257

CCAGCCTACGGGTGGCTGCAGTAGGGAATATTGGACAATGGGCGCAAGCCTGATCCAGCC  
ATGCCGCGTGAGTGATGAAGGCCTTAGGGTTGTAAAGCTCTTTCACCCACGACGATAATG  
ACGGTAGTGGGAGAAGAAGCCCCGGCTAACTTCGTGCCAGCAGCCGCGGTAATACGAAGG  
GGGCTAGCGTTGTTTCGAATCACTGGGCGTAAAGCGCGCGTAGGCGGACCGTTAAGTCGG  
AGGTGAAAGCCTGGAGCTCAACTCCAGAACTGCCTTCGATACTGGCGGTCTCGAGTCCGG  
GAGAGGTGAGTGGAAGTGTAGTGTAGAGGTGAAATTCGTAGATATTAGCAAGAACACCA  
GTGGCGAAGGCGGCTCACTGGCCCGGTACTGACGCTGAGGTGCGAAAGCGTGGGGAGCAA  
ACAGGATTAGAAACCCCCGTAGTCCG

>Otu2259

CCAGCCTATGGGTTGCTGCAGTGAGGAATTATGCGCAATGGGGGAAACCCTGACGCTGCG  
ACGCCGCGTGGGTGATGAAGGTCTTCGGATCGTAAACCCTGTTCGAGAGGGGGCGAAAAGC  
CCTGGTGCTAATACCACTGGGGCCTGACGGTACCTCTGGAGGAAGTCCCGGCTAACTCCG  
TGCCAGCAGCCGCGGTAATACGAGGGGGCGAGCGTTGTTTCGAATTACTGGGCGTAAAG  
CGCGCGTAGGCGGTCTGTGAAGTCGGATGTGAAAGCCCTCAGCTCAACTGAGGAATTGCG  
TCCGATACTGCTCGGCTTGAGTCCGGTAGGGGATGGCAGAATTCCCGGTGTAGCGGTGGA  
ATGCGTAGATATCGGGAGGAATACCGATGGCGAAGGCGGCCATCTGGGCCGGAAGTACG  
CTGATGCGCGAAAGCTAGGGGAGCAAACAGGATTAGATACCCTCGTAGTCC

>Otu2260

CCAGCCTACGGGGCGCTGCAGTGGGGAATTTTGCGCAATGGGGGAAACCCTGACGCAGCA  
ACGCCGCGTGAGGATGAAGTACTTTCGGTACGTAAACTCCTTTTCGATCGGGACGATAATG  
ACGGTACCGGAAGAAGAAGCCCCGGCTAACTTCGTGCCAGCAGCCGCGGTAATACGAGGG  
GGGCAAGCGTTGTTTCAGAATTATTGGGCGTAAAGGGTGCGTAGGCGGTTTGGTAAGTCTT  
TTGTGAAATCTATGGGCTCAACTCATAGACTGCAAGGGAAACTGCCGGGCTTGAGTGTGG  
GAGAGGTGAGTGGAATTTCCGGTGTAGCGGTGAAATGCGTAGATATCGGAAGGAACACCA  
AAGGCGAAGGCGGCTACCTGCACCGATATTGACGCTGAGACGCGAAAGCGTGGGGAGCAA  
ACAGGATTAGATACCCGAGTAGTCC

>Otu2263

CCAGCCTACGGGAGGCAGCAGTCGAGAATATTCCACAATGGACGAAAGTCTGATGGAGCG  
ACGCCGCGTGAGGATGAAGGCCTTCGGGTCTGTAACCTGCGGTAGTAAGTCAGCAATGCA  
AATGAGCAACTTACGGAAGAGGTTGGTAACCTACGTGCCAGCACCCGCGGTAACACGTAG  
ACCTCAAGCGTTATCCGGATTATTGGGCGTAAAGAGCATGTAGGAGGTTTCGCGCGTCT  
TCTGTTAAAGCCCACCGCCCAACGGTGGAAGTGCAGGAGATACGGCGAGACTAGAGGATG  
TTAGAGGTACCAGGAACACACGGTGTAGGGGTGAAATCCGTTGATATCGTGTGGAACACC  
AAAGGCGAAGGCAAGGTACTGGGACACTCCTGACTCTGAGATGCGAAAGCGTGGGGAGCA  
AAAAGGATTAGAGACCCCTGTAGTCC

>Otu2264

CCAGCCTACGGGATGCAGCAGTAGGGAATTTTCCGCAATGGGCGAAAGCCTGACGGAGCG  
ACGCCGCGTGAGGGACGAAGGTCTTCGGATTGTAAACCTCTTTGGAGTGAGACGAACGAG  
CTTACGGTGAATAATCGTAGGCAGTGACGGTATCACTAGAACAAGTCACGGCTAACTCTG  
TGCCAGCAGCCGCGGTAATACAGAGGTGACGAACGTTGTCCGGAATTACTGGGCGTAAAG  
GGCGTGTAGGTGGTCAGATAAGTCAGATGTGAAAGCTCTGGGCTTAACCCGGGAATTGCA  
TTTGATACTGTTGGCTTGAGTACGGTAGAGGAGGGTGGAATTCCCAGTGTAGCGGTGAA  
ATGTGTAGATATTGGGAGGAACACCGGTGGCGAAGGCGGCCCTCTGGACCGAGACTGACG  
CTGAAACGCGAAAGCTAGGGGAGCAAACGGGATTAGATACCCGCGTAGTCC

>Otu2265

CAGCCTATGGGTGGCTGCAGTAACGAATATTGGGCAATGGGCGAAAGCCTGACCCAGCGA  
CGCCGCGTGTGGGAAGAAGTTCTTCGGAATGTAAACCACTGTCAGGGATTACCAAGCGAT  
CCCGACTAATAGTCGGGAGAGTTGAGGAGTCCCAGAGGAAGCAACGGCTAACTTCGTGCC

AGCAGCCGCGGTAATACGAAGGTTGCGAGCGTTGTTTCGGAATCACTGGGCTTAAAGAGCA  
CGTAGGCGGCCCATCAAGTGCCTTGTGAAATCCCCCGGCTCAACCGGGGAATTGCTTGGT  
AGACTGCTGGGCTTGAGGCAAGTAGAGGCGCGTGGAACCTCTTGGTGGAGCGGTGGAATGC  
GTAGATATCAAGAGGAACGCCGGTGGCGAAAGCGGCGCGCTGGGCTTGTCTTGACGCTGA  
GGTGCGAAGCCAGGGGAGCAAACGGGATTAGAAACCCCGGTAGTCC

>Otu2266

CCAGCCTATGGGACGCACCAGTCGAGGATCATTCGCAATGGGCGAAAGCCTGACGATGCG  
ACGCTGTGTGAGTGATGAAGGCCTTCGGGTCGTAAAGCTCTTTCGCCTTGGAACAAGAGA  
GTGTAGTGAATAACTATACAATTTGAGGGTACAAGGTAAAGAAGCACCGGCTAACTCCGT  
GCCAGCAGCTGCGGTAATACGGAGGGTGCAAGCATTAAATCGGAATTATTGGGCGTAAAGG  
GCGCGTAGGCGGATTTGTAAGTCAGATGTGAAATTCGGAAGCTCAACTTCGGAGCTGCAT  
TTGAAACTGTAAGTCTAGAGGAATGGCGGAGAAAATGGAATTCACGTGTAGCGGTGAAA  
TGCGTAGATATGTGGAAGAACACCGGTGGCGAAAGCGGTTTTCTAGCTTTTTCTGACGC  
TGAGGCGCGAGAGCAAGGGGAGCAAACAGGATTAGATAACCCCTGTAGTCC

>Otu2268

CCAGCCTACGGGTGGCTGCAGGTACGAGGTCTCCGCAATGCACGAAAGTGTGACGGGGGA  
ATTCCAAGTGCTTTGCCTTCGGGCAAAGCTGTGTTAAAGTCTAAATAGCTTTAAAAGAAA  
GGGGTGGGAAAGACCGGTGCCAGCAGCCGCGGTAATCCCGGCACCTCAAGTAGTGACCGC  
TATTATTGGGCCATAAGTATCCGTAGCCGGATTCTAAGTTCTCTGTGAAATCGCGTGCC  
TTAACCATGCGGCGTGCAGAGAATACTGTTAATCTAGAGACCGGGTGGGGTCAGGGGTAT  
TCCTAGGGTAGCGGCTAAATGTTATAATCCTAGGAGGTCCAACAGTGGTGGAGACGCCTG  
ACTAGAACGGGTCTGACGGTGAATGGATGAAAGCTGGGGGAGCAAAGCGGATTAGAGACC  
CCCGTAGTCC

>Otu2271

CCAGCCTACGGGTGCTGCAGTGGGGAATCTTGCAATGGGGGAAACCCCTGATGCAGCG  
ACGCCGCGTGAGCGATGAAGCCCTTCGGGGTGTAAGCTCTTTCGGCAGGAAAGATTATG  
ACGGTACCTGCGGAAGAAGCTGCGGCTAACTACGTGCCAGCAGCCGCGGTAATACGTAGG  
CAGCGAGCGTTGTTTCGGAGTTACTGGGCGTAAAGAGTGCGTAGGTGGTTTTCTAAGTTTG  
GTGTGAAATCTCCCGGCTCAACTGGGAGGGTGCGCCGAAAACCTGGAAGGCTAGAGTGTGG  
GAGAGGAGAGCGGAATTCCTGGTGTAGCGGTGAAATGCGTAGATATCAGGAGGAACACCT  
GCGGTGCAGACGGCTCTCTGGACCATTACCGACACTGAGGCACGAAAGCGTGGGGAGCAA  
ACAGGATTAGAAACCCCAGTAGTCC

>Otu2273

CCAGCCTACGGGGTGCTCCAGGTAGGAAACTTCTGCAATACACGCAAGTGTGACAGAGCA  
AGCCAGAGTGTTTTTTCATATAATTTGAAAATCTTTTTCGGGATGTAAAAAGTCCCGAGAA  
TAAGGACCGGGCAAGACTGGTGCCAGCCGCCGCGGTAATCCCAGCGGTCCAAGTCGCAGC  
CACAATTATTGGGTCTAAAACATCCGTAGCTTGCTTTGCAAGTCTTTTGTGAAATCGGGA  
ATCTTAAGTTTCCGGCGAGCATAAGATACTGCTTAGCTTGAGACCGGGAGATGCAAGGAG  
TACGTTAGGAGTAGCGGTAAAATGCGTTGATCCTTAACGGACTAACAACAGCGAAGGCAC  
CTTGCAAGAACGGATCTGACAGTGAGGGATGAAGGCTAGGGGCGCAAAGTGGATTAGATA  
CCCCTGTAGTCC

>Otu2274

CCAGCCTACGGGTGCGCAGCAGTTTCGAATCTTTCGCAATGGGCGCAAGCCTGACGAAGCG  
ACGCCGCGTGGGGGATGAAGGTCTTCGGATCGTAAACCCCTGTCAGCCGTGAACAATGTC  
ACTCATTTAACAGACGGGTGATTTGATGGTAACGGCAGAGGAAGAGGTTGCTAACTCTGT  
GCCAGCAGCAGCGTAATACAGAGACCTCAAGCGTTGTTTCGGATTCAATTGGGCGTAAAGA  
GTGCGCAGGCGGCTGGGTGTGTCGGACGTGAAATCCCGAGGCTTAACCTCGGAAGTGCAT  
CCGAAACTGCCCCGCTGGAGGTTTGCAGAGGCGAGCGGAATTCACGGTGTAGCGGTGAAA  
TGCGTAGATATCGTGAGGAAGACAGTGGCGAAGGCGGCTCGCTGGGCAAATCCTGACGC  
TGGTGCACGAAAGCGTGGGGAGCCAATGGGATTAGATAACCCAGTAGTCC

>Otu2275

CCAGCCTACGGGTGGCAGCAGTGAGGAATATTGGTCAATGGGCGCAAGCCTGAACCAGCC  
ATGCCGCGTGAAGGATGAATGCCCTATGGGTGTAAACTTCTTTTGTACGGGACGAAACC  
CCTGAACGTGTTTGGGGCTGACGGTACCGTACGAATAAGCATCGGCTAACTCCGTGCCAG  
CAGCCGCGGTAATACGGAGGATGCAAGCGTTATCCGGATTCAATTGGGTTTAAAGGGTGCG  
TAGGCGGGAAAAATAAGTCAGTGGTGAAAGCCTACAGCTTAACTGTAGAATTGCCATTGAT  
ACTGTTATTCTTGAGTACATTTGAAGTGGGTGGAATGTGTGGTGTAGCGGTGAAATGCTT  
AGATATCACACAGAACGCCAATTGCGAAGGCAGCTCACTAAGCTGTTACTGACGCTGAGG

CACGAAAGCGTGGGGATCAAACAGGATTAGATACCCGAGTAGTCC

>Otu2276

CCAGCCTATGGGGGGCAGCAGTGGGGAATATTGGGCAATGGGCGAAAGCCTGACCCAGCC  
ATGCCGCGTGACAGGAAGACGGCCCTACGGGTGTGAACTGCTTTTGCAGGGGAATAAACCC  
TCATTACGTGTAATGAGCTGAATGTACTCTGAGAATAAGGATCGGCTAACTCCGTGCCAG  
CAGCCGCGGTAATACGGAGGATCCAAGCGTTATCCGGATTTATTGGGTTTAAAGGGTGCG  
TAGGCGGCCAATTAAGTCAGGGGTGAAAGACGGTAGCTTAACCTATCGCAGTGCCTTTGAT  
ACTGATTGGCTTGAATGGACTAGAGGTAGGCGGAATGTGACAAGTAGCGGTGAAATGCAT  
AGATATGTCACAGAACACCAATTGCGAAGGCAGCTTACTATGGTTTTATTGACGCTGAGG  
CACGAAAGCGTGGGGATCAAACAGGATTAGAAACCCTGGTAGTCC

>Otu2277

CCAGCCTATGGGGGGCAGCAGTGGGGAATATTGGGCAATGGGCGCAAGCCTGACCCAGCC  
ACGCCGCGTGAGTGATGGAGGCCCTTCGGGTCTGTAAGCTCTGTGGGGAGGGACGAACCTC  
TGCAACCCAATACGTTGCAGACTGACGGTACCTCCTTAGCAAGCACCGGCCAACTCCGTG  
CCAGCAGCCGCGGTAATACGGAGGGTGCAAACGTTGCTCGGAATCATTGGGCGTAAAGCG  
CGCGTAGGCGGTCCAGTCAGTCGGGTGTGAAAGCCCTCGGCTTAACCGAGGAAGTGCATC  
CGAAACTACTGGGCTAGAGTACCGGAGAGGACGACGGAATTCCCGGTGTAGAGGTGAAAT  
TCGTAGATATCGGGAGGAACACCAGCGGCGAAGGCGGTCTGTCTGGACGGATACTGACGCT  
GAGGCGCGAAAGCGTGGGGAGCAAACAGGATTAGAAACCCGTGTAGTCC

>Otu2278

CCAGCCTATGGGGGGCAGCAGGCGCGAGAATTCTCCAATGCACGCAAGTGTGAGAGAGGA  
ATCTTGAGTGCTTTTCTTAATGAAAAGCTTTTGCCTACTGTAAAAAGGTACGAGAATAAG  
GGCTGGGCAAGATCGGTGCCAGCAGCCGCGGTAATCCCGACGGCCCAAGTGGGACTCGCA  
ATTATTGGGTCTAAACATTTCGTAGCTGGTTTTATAAGTTTCTTGTTAAATTGCAAGGCT  
CAACCTTGAGCTGCAAGAAATACTATCAAGCTGGAGACTGGGAGACGTAATGAGTACAG  
CAAGGGTAATGGTAAATATTCTAATCCTAGCTGGACTAACAATGGCGAAGGCACGTTAC  
GAGAACAGTTCTGACAGTGAGGAATGAAGGCCAGGGGCGCAAATTGGATTAGAAACCCCA  
GTAGTCC

>Otu2280

CCAGCCTATGGGTGGCAGCAGTCGAGAATCTTTAGCAATGGGCGAAAGCCTGACTATGCG  
ACGCCGCGTGAGGGATGAAGGTTTTTCGGATCGTAAACCTCTTTTCGAAAGGGAAGAAGTCC  
GCCTTTGGCGGATTGACGGTACCTTGAGAAGAAGCCACGGCCAACCTCCGTGCCAGCAGCC  
GCGGTAATACGGGGGTGGCGAGCGTTACTCGGAATTACTGGGTGTAAAGGGCAAGTAGGT  
GGCTGTGTAAGTTGGGGGTGAAATGCTTTGACTCAATCAAAGAACTGCCTTCAAACTGC  
ATAGCTTGAGGCTGGAATAGGAGAGCGGAATTCCCGGTGTAAGGGTGGAATCTGTAGATA  
TCGGGAGGAACACCAGTTGCGAAGGCGGCTCTCTAGTCTAGATCTGACACTAATTTGCGA  
AAGCTAGGGTAGCAAACAGGATTAGATACCCCTGTAGTCC

>Otu2281

CCAGCCTATGGGGGGCTCCAGTGAGGAATATTGCGCAATGCCCCGCAAGGGTGACGCAGCG  
ACGCCGCGTGAGGATGAAGGCCCTATGGGTCTGTAACCTCCTTTTGAGAGGGAAGAATGG  
TCTGCTACAGGCAGGCTTGACTGTACCTTTAGAAGAAGCACCGGCTAACTACGTGCCAGC  
AGCCGCGGTAATACGTAGGGTGCGAGCGTTGTCCGGAATTACTGGGTGTAAAGGGAGCGC  
AAGCGGGTCAGTAAGTCATTGGTGAAAACGCGGAGCTCAACTCCGACGATGCCATTGATA  
CTATTGATCTTGAGTGCAGAAGAGGAAGATGGAATTCCTGGTGTAGCGGTGAAATGCGTA  
GATATCAGGAAGAACACCGGTGGCGAAGGCGGTCTTCTGGTCTGCAACTGACGCCCCGGC  
TCGAAAGCGTGGGGAGCAAACAGGATTAGAGACCCCAGTAGTCC

>Otu2283

CCAGCCTACGGGGTGACACAGTCGAGAATTTTTCTCAATGGGGGAAACCCTGAAGGAGCG  
ACGCCGCGTGAAAGATGAAGGTCTTCGGATTGTAACTTCTGTCAATTAGAGAACAAGTGC  
ACGGGCAGTAACTGGCCTGTGTTTGATAGTATCTGAAGAGGAAGGGACGGCTAACTCTGT  
GCCAGCAGCCGCGGTAATACAGAGGTCCCAAGCGTTGTTTCGGATTCAATTGGGCGTAAAGG  
GTGCGTAGGCGGTGCCGTAAGTCGGATGTGAAATCTCGGAGCTCAACTCCGAAACTGCAT  
TCGATACTGCGGTGCTTGAGGACTGGAGAGGAGATCGGAATTCACGGTGTAGCAGTGAAA  
TGCGTAGATATCGTGAGGAAGACCGGTGGCGAAGGCGGATCTCTGGACAGTTTCTGACGC  
TGAGGCACGAAGGCCAGGGGAGCAAACGGGATTAGAAACCCCAGTAGTCC

>Otu2291

CCAGCCTACGGGTGGCACCAGTGGGGAATATTGCGCAATGGTCGAGAGACTGACGCAGCG  
ACGCCGCGTGTTGGGATGAAGCTCTTCGGGTGTAAACCACTGTTGCCTGGGACGAACGGG

CGGATCAATCCGCCGTGACGGTACCAGGTGAGGAAGCACCGGCTAACTCCGTGCCAGCAG  
CCGCGGTAATACGGAGGGTGCAGCGTTGTCCGGAGTCACTGGGCGTAAAGGGCGCGTAG  
GTGGCTTTGTAAAGCGGGCGGTGAAAGTCCGGGGCTCAACCCCGGATCGGCCGTGCGGACT  
GCAAAGCTCGAGCACTGTAGAGGCAGGTGGAATTCCGGGTGTAGCGGTGGAATGCGTAGA  
GATCCGGAGGAACACCAGTGGCGAAGGCGGCCTGCTGGGCAGTGGCTGACACTGAGGCGC  
GACAGCGTGGGGAGCAAACAGGATTAGATAACCCGAGTAGTCC

>Otu2292

CCAGCCTATGGGACGCAGCAGGCGCGAAACCTCCACAATGCACGAAAGTGTGATGGGGGG  
ATCCTACGTGCTCATGTCTAACATGGGCTTTTGCTGAGACCAGACATCTCGGCGAATAAG  
GGGTGGGCAAGACCGGTGCCAGCCGCCGCGGTAACCCCGGCGCCCCGAGTGGCAATCACG  
ATTATTGGGCCTAAAGCGTCCGTAGCCGGACGGGTAAATCCTCTGTGAAATCGCTGCGCT  
TAACGTAGCGGCACGCAGGGGAAACTGCTCGTCTCGAGACCGGGAGGGGTCAGAGGTATG  
CCGTGGGGACTGGTAAAATGGTATAATCCACGGTAGACCACCAATGGCGAAGGCATCTGA  
CCGGAACGGATCTGACGGTGAGGGACGAAAGCTGGGGGAGCGAACCGGATTAGATAACCT  
TG TAGTCC

>Otu2295

CCAGCCTACGGGTGCTCCAGGCGCGAAAACCTTTCCAATGCACGCAAGTGTGAGAAGGGA  
ATCCTAAGTGCTCAAGCAAAGCTTGGGCTTTTGCTATGTGTAAAAAACATGGCGAATAAG  
TGGTGGGCAAGACTGGTGCCAGCCGCCGCGGTAACCCAGCGCCACAAGTGGCATTTCGCG  
TTTATTGGGCCTAAAGCGTCCGTAGCAGGTCTGAAAATTCCTTGTGAAATTGCCAGGCT  
CAACTTGGCAGAGTGCAGGGAACACTACAGAGCTTGGGACCGGGAAGGGTCAGAGGTATT  
CCTGAGGGGGCGGTAAAATGCTATAATCTCAGGAGGACCACCGGTGGCGAAGGCGTCTGA  
CTAGAACGGATCCGACTGTGAGGGACGAAAGCCAGGGGATCAGAACGGATTAGATAACCCG  
TG TAGTCC

>Otu2297

CCAGCCTACGGGGCGCTGCAGTGAGGAATCTTGCGCAATGGGGGAAACCCTGACGCAGCA  
ACGCCGCGTGAGTGAGGAAGGTTTTTCGGATCGTAAAGCTCTGTCAGGTGGGAAGAAATGT  
ATAAGGGTTAACAGCCTTTATGCTTGACGGTACCACCAAAGGAAGCACCGGCTAACTCCG  
TGCCAGCAGCTGCGGTAATACGGGGGGTGCAAGCGTTGTTTCGGAATTATTGGGCGTAAAG  
AGCGTGTAGGCGGCTTGATAAGTCAGATGTGAAAGCCCTGGGCTTAACCCAGGAAGTGCA  
TTTGAAACTGTCTTGCTTGAGTAGGGGAGAGGAAAGTGAATTCTTGGTGTAGAGGTGAA  
ATTCGTAGATATCAGGAGGAACACCGGTGGCGAAGGCGACTTTCTGGCCCTATACTGACG  
CTGAGACGCGAGAGCGTGGGGAGCAAACAGGATTAGAAACCCTGGTAGTCC

>Otu2298

CCAGCCTATGGGGGGCAGCAGTGAGGAATATTGGGCAATGGGGGAAACCCTGACCCAGCG  
ACGCCGCGTGGGTGACGAAGGCCTTCGGGTCGTAAAACCCTTTTGGCAGGGAAGAGTGAG  
GACGGTACCTGTCAATAAGTCTCGGCTAACTACGTGCCAGCAGCCGCGGTAAAACGTAG  
GAGGCGAGCGTTATCCGGATTTACTGGGCGTAAAGCGCGCGTAGGCGGGTGGGTAAAGTCT  
GACGTGAAAGCCCCTGGCTCAACTGGGGGAGGCCGTTGGATACTGCCCCGGCTTGAGGGTG  
AGAGAGGAGAGTGGAATTCCCGGTGTAGCGGTGGAATGCGTAGAGATCGGGAGGAACACC  
AGTGGCGAAAGCGACTCTCTGGCTCACCCCTGACGCTGAGTGCGCGAAAGCGTGGGGAGC  
AAACGGGATTAGAGACCCCTGTAGTCC

>Otu2301

CCAGCCTACGGGAGGCACCAGTCGAGAATTTTTCTCAATGGGGGAAACCCTGAAGGAGCG  
ACGCCGCGTGAAGGATGAAGTCTTCGGATTGTAAACTTCTGTCATTGGGGAACAATGTG  
TGGTCGTTAACTGCGATCGCATTTGATAGTACCCAAAGAGGAAGAGACGGCTAACTCTGTG  
CCAGCAGCCGCGGTAATACAGAGGTCTCAAGCGTTGTTTCGGATTTCATTGGGCGTAAAGGG  
TGCGTAGGTGGTGTCTGAAGTCGGGTGTGAAATCTCGGGGCTTAACCCGAAACTGCATT  
CGATACTGCGATGCTCGAGGACTGGAGAGGAGACTGGAATTCACGGTGTAGCAGTGAAAT  
GCGTAGATATCGTGAGGAAGGCCAGTGGCGAAGGCGGGTCTCTGGACAGTTCCTGACACT  
GAGGCACGAAGGCCAGGGGAGCAAACGGGATTAGAAACCCGCGTAGTCC

>Otu2303

CCAGCCTATGGGAGGCTGCAGTAGGGAATATTGGGCAATGGGCGAAAGCCTGACGCAGCA  
ACGCCGCGTGGGTGATGAAGGTCTTCGGATTGTAAAACCCTGTGTCGTTGGGGACGAAGGTG  
CGGGATCTAATAGGTCTTGTACTTGACGGTACCCGAGAGGAAGCCCCGGCTAACTCTGT  
GCCGGCAGCCGCGGTAATACAGAGGGGGCAAGCGTTATTTCGGAGTTACTGGGCGTAAAGG  
GCGCGTAGGCGGTTCTTTAAGTCAGATGTGCAATCCCCGAGCTCAACTTGGGAACTGCAT  
CTGAGACTGGAGAGCTAGAGTACTGGAGAGGGTGGTGAATTCCTCGTGTAGCGGTGAAA

TGCGTAGAGATGAGGAGGAACACCAGTGGCGAAGGCGGCCACCTGGACAGTGACTGACGC  
TGAGGCGCGAAAGCGTGGGTAGCAAACAGGATTAGAAAACCCTAGTAGTC  
>Otu2304  
CCAGCCTATGGGTCGCTCCAGTGAGGAATATTGCGCAATGGGGGAAACCCTGACGCAGCG  
ACGCCGCGTGAGTGATGAAGGCCTTCGGGTTGTAAAGCTCTGTCAGAGGGGAAGAAAGGA  
GAAGTAGCTAATATCTGCTTCTATTGACGGTACCCTCGGAGGAAGCACCGGCTAACTCCG  
TGCCAGCAGCCGCGGTAATACGGAGGGTGCAAGTGTTATTTCGGATTTACTGGGCGTAAAG  
AGCACGTAGGCGGATAGGTCAGTCAGATGTGAAAGCCCGGAGCTTAACTCCGGAAGTGA  
TTTGATACTACCTGTCTTGAGTATGGTAGAGGGGGGTGGAATTCCCAGGTGTAGAGGTGAA  
ATTCGTAGATATCGGGAGGAACACCAGAGGCGAAGGCGACCCCTGGGCAATAACTGACG  
CTGAGGTGCGAAAGCGTGGGGAGCAAACAGGATTAGATAACCCAGTAGTCC  
>Otu2306  
CCAGCCTACGGGTTGCAGCAGCCGAGAATATTCGACAATGGGCGGAAGCCTGATCGAGCG  
GTACCGCGTGGTGGATGAAGCGTTTCGACGCGTAAACACCTTTTATGGAGGAGGAATTTT  
TGACGTTACTCCATGAATAAGGGGCTCCTAACTCTGTGCCAGCAGGAGCGGTAATACAGA  
GGCCCCGAGCGTTACCCGGAATTACTGGGCGTAAAGAGTGTGTAGGTGGTTGTGTTAGTC  
GTTTGTAAAGACCAGGGCTCAACCTTGAATCGCAAGCGAAACGGCACAACCTTGAGGGC  
ATGAGAGGTCTGCAGAACTCTAGGTGTAGGGGTAAAATCCGTTGATATCTAGGGGAATAC  
CGAAAGCGAAGGCAGCAGACTGGCGTGTTCTTGACACTCAAACACGAAAGCGTGGGTAGC  
GAATGGGATTAGATAACCCGCGTAGTCC  
>Otu2312  
CCAGCCTATGGGTGGCTGCAGTCGAGGATCTTCGGCAATGGGCGCAAGCCTGACCGAGCG  
ACGCCGCGTGCGGGATGAAGGCCTTCGGGTTGTAAACCGCGTCGGAGTGGAGGAAATTT  
CAGGGGGTTCTCCCCTTGGATTGACTAATACTCAGAGGAAGGACGGGCTAAGTTCGTGCC  
AGCAGCCGCGGTAAGACGAACCGTCCAAACGTTATTTCGGAATCACTGGGCTTAAAGGGTG  
CGTAGGCGGCCCCGAAAGTTGGGTGTGAAAGCCCTCGGCTCAACCGAGGAATTGCGCCCA  
AACTACCGGGCTCGAGGAAGACAGAGGTAAGCGGAACCTTAGGGTGGAGCGGTGAAATGC  
GTTGATATTCTAAGGAACACCAGGAGCGAAAGCGGCTTACTGGGTCTTTTCTGACGCTGA  
GGCGCGAAAGTGTGGGTAGCAAACAGGATTAGAAAACCCAGTAGTCC  
>Otu2314  
CCAGCCTATGGGGGGCAGCAGTGAGGAATATTGGTCAATGGGCGAGAGCCTGAACCAGCC  
AAGTCGCGTGAAGGAAGAAGGTTCTATGGATTGTAAACTTCTTTTGTAAGGGAATAAAAT  
GCGCTACGTGTAGTGTTTTGTATGTACTTTACGAATAGGGATCGGCTAACTCCGTGCCAG  
CAGCCGCGGTAATACGGAGGATCCGAGCGTTATCCGGATTTATTGGGTTTAAAGGGTGCG  
TAGGCGGACCCGTAAGTCAGTGGTGAAAGTTTGCAGCTTAACTGTAAAATTGCCATTGAA  
ACTACGGATCTTGAGTGTAATGAGGTAGGCGGAATGTGTTGTGTAGCGGTGAAATGCTT  
AGATATAACACAGAACACCAATTGCGAAGGCAGCTTACTAGGATACAAC TGACGCTGAGG  
CACGAAAGCGTGGGGATCAAACAGGATTAGATAACCCTAGTAGTCC  
>Otu2316  
CCAGCCTATGGGAGGCAGCAGTGGGGAATATTGCTCAATGGGCGAAAGCCTGAAGCAGCG  
ACGCCGCGTGAAGGATGAAATCCGTTAGGATGTAAACTTCTTTTGCAAGGGAAGAATATC  
CGCCTTGGGCGGAGTGACGGTACTCTGCGAATAAGCACCGGCTAACTACGTGCCAGCAGC  
CGCGGTAATACGTAGGGTGCAAGCGTTGTCCGGAATTACTGGGTGTAAAGGGTCCGCAGG  
CGGCGAGACAAGTCGATGGTGAAATCCCGTGGCTCAACCACGGAAGTCCGTTGATACTG  
TTTGTCTTGAATTCGAGAGAGGATGATGGAATTCATGGTGTAGCGGTGAAATGCGTAGAG  
ATCATGAAGAACACCGGAAGCGAAGGCGGTCATCTGGCTCGATATTGACGCTCAGGGACG  
AAAGCGTGGGGAGCAAACAGGATTAGAGACCCGCGTAGTCC  
>Otu2318  
CCAGCCTATGGGGTGCAGCAGTGGGGAATCTTGCGCAATGGGCGAATGCCTGACGCAGCG  
ACGCCGCGTGTGGGATGACGGCCTTCGGGTTGTAAACCACTGTCGGGAGGGACGAAGGCC  
CGGCGGCGAATAGCCGACCGGGATTGACGGTACCTCCAAAGGAAGCACCGGCTAACTCCG  
TGCCAGCAGCCGCGGTAATACGGAGGGTGCGAGCGTTGTCCGGAATCACTGGGCGTAAAG  
GGCGCGTAGGCGGCTGGGTAAGTCACGCGTGAAATTCGGGGGCTCAACCCGGAACGGCG  
TGTGGGTCTGCCCGGCTAGAGCACGGTAGAGGCGAGTGGAATTCAGGTGTAGCGGTGGA  
ATGCGTAGATATCTGGAAGAACACCGGTGGCGAAGGCGGCTCGCTGGGCCGTTGCTGACG  
CTGAGGCGCGAAAGCGTGGGGAGCAAACAGGATTAGATAACCCCGTAGTCC  
>Otu2322  
CCAGCCTACGGGGCGCAGCAGGTAGGAATCTTTTGCAATGCGCGCAAGCGTGACAAAGCG

AGCCAGAGTGCTTTTCATTTGAAAAGCTTTTGCTAAATCTAAAACGTTTGGCGAATAAGG  
ACTGGGTAAGACTAGTGCCAGCCGCCGCGGTAATCCTAGCGGTCCAAGTCGCAGCCATCA  
TTATTGGGTCTAAAACATCCGTAGCTTGTTTAATAGGTTCCCTGTGAAATCTTGTCTCTT  
AAAGGCAAGGCGTGCAAGGAATACTGCTAAACTAGAGACTGGAAGACGTAAGAAGTATGT  
TCAAAGTAGTGTTAAAATATGTTAATCTTGGACAGACTAACAACAGCGAAGGCATCTTAC  
GAGGACAGTTCTGACAGTAAAGGATGAAGGCTAGGGTCGCGAAAGGGATTAGATACCCTG  
GTAGTCC

>Otu2323

CCAGCCTACGGGATGCTCCAGTGGGGAATATTGGACAATGGGCGCAAGCCTGATCCAGCC  
ATGCCGCGTGAGTGATGACGGCCTTCGGGTGTAAAGCACTTTTGTCCGGAAGAAAACCT  
TCTGCCCTAATACGGTGGGAGGATGACGGTACCGGAAGAATAAGCACCGGCTAACTACGT  
GCCAGCAGCCGCGTAATACGTAGGGTGCGAGCGTTAATCGGAATTACTGGGCGTAAAGC  
GTGCGCAGGCGGTTTCGTTAAGACAGATGTGAAATCCCCGGGCTTAACCTGGGAACTGCAT  
TTGTGACTGGCGAGCTAGAGTATGGCAGAGGGGGGTAGAATTCCACGTGTAGCAGTGAAA  
TGCGTAGAGATGTGGAGGAATACCGATGGCGAAGGCAGCCCCCTGGGCCAATACTGACGC  
TCATGCACGAAAGCGTGGGGAGCAAACAGGATTAGAAACCCCTGTAGTCC

>Otu2325

CCAGCCTATGGGTGGCAGCAGTGAGGAATATTGGACAATGGGCGAAAGCCTGATCCAGCA  
ATACCGCATGAGTGAAGAAGGCCTTCGGGTGTAAAGCTCTTTCAGCAGGGAAAATAATG  
ATGGTACCTGCAAAAGAAGTCCCGGCTAACTCCGTGCCAGCAGCCGCGTAATACGGAGG  
GAACTAGCGTTGTTTCGATTACTGGGCGTAAAGGGCGCGTAGGCGGTTTGTTAAGTTAG  
AAGTGAAAGCCCAGGGCTTAACCCCTGGAACGTCTTCTAAACTGGCAGACTAGAGTGCGG  
GAGAGGATAGTGGAATTCCTAGTGTAGAGGTGAAATTCCTAGATATTAGGAGGAACACCA  
GTGGCGAAGGCGACTATCTGGAACGTTACTGACGCTGAGGCGCGAAAGCGTGGGGAGCAA  
ACAGGATTAGATACCCCCGTAGTCC

>Otu2327

CCAGCCTATGGGGGGCACCAGTGGGGGATATTGGACAATGGGCGAAAGCCTGATCCAGCA  
ATGCCGCGTGAGTGATGAAGGCCTTAGGGTTGTAAAGCTCTTTCGGGTGGGACGATGATG  
ACGGTACCACCAGAAGAAGCCCCGGCTAACTTCGTGCCAGCAGCCGCGTAATACGAAGG  
GAGCTAGCGTTGTTTCGGAATTACTGGGCGTAAAGGGCGCGTAGGCGGTTTAACAAGTTGG  
GTGTGAAAGCCCAGGGCTCAACCCCTGGAACGGCACCCAAGACTGTTTTACTTGAATTCGG  
TAGAGGTTGGTGGAATTCCTAGTGTAGAGGTGAAATTCGTAGATATTGGGAAGAATATCC  
GTGGCGAAGGCGGCCAACTGGACCGACATTGACGCTGAGGCGCGAAAGCGTGGGGAGCAA  
ACAGGATTAGAAACCCCCGTAGTCC

>Otu2331

CCAGCCTATGGGGTGCGAGCAGTGGGGAATTTTGGACAATGGGGGAAACCCTGATCCAGCA  
ATGCCGCGCGTGTAAGAAGGCCTTCGGGTGTAAAGCACTTTTGTCCGGAAGAAATCC  
TTTGAGTTAATACCTCGGGGGGATGACGGTACCGGAAGAATAAGCACCGGCTAACTACGT  
GCCAGCAGCCGCGTAATACGTAGGGTGCAAGCGTTAATCGGAATTACTGGGCGTAAAGC  
GTGCGCAGGCGGTCGCTAAGACAGATGTGAAATCCCCGGGCTTAACCTGGGAACTGCAT  
TTGTGACTGTAGAGCTGGAGTACGGCAGAGGGGGATGGAATTCGCGGTGTAGCAGTGAAA  
TGCGTAGATATGCGGAGGAACACCGATGGCGAAGGCAATCCCCTGGGCCTGTACTGACGC  
TCATGCACGAAAGCGTGGGGAGCAAACAGGATTAGATACCCTCGTAGTCC

>Otu2335

CCAGCCTATGGGTTGCTCCAGTCGAGAATCTTTCTCAATGGGCGCAAGCCTGAAGGAGCG  
ACGCCGCGTGAGGATGAAGTCTTCGGATTGTAAACTCCTGTCATTAGGGAACAAGTGG  
CGCGATAGTAACTGCTCGCGCCTTGATAGTACCTGAAGAGGAAGAGACGGCTAACTCTGT  
GCCAGCAGCCGCGTAATACAGAGGTCTCAAGCGTTGTTTCGGATTCAATTGGGCGTAAAGG  
GTGCGTAGGTGGTGTCTGTAAGTCGGATGTGAAATCTCGGGGCTTAACCCCGAACTGCAT  
TCGATACTGCGGTGCTCGAGGACTGGAGAGGAGATCGGAATTCACGGTGTAGCAGTGAAA  
TGCGTAGATATCGTGAGGAAGGCCAGTGGCGAAGGCGGATCTCTGGACAGTTCCTGACAC  
TGAGGCACGAAGGCCAGGGGAGCAAACGGGATTAGAGACCCCTAGTAGTCC

>Otu2338

CCAGCCTATGGGACGCACCAGGAAGAGACAGGCGGATTTACGGCGTTCACTCCCTTTGCG  
TTTCAACCAACGGCCGCGCGCCGCAAGTCTTCCAGGCTGGGAAGAGGCCACCGGGGTGGAG  
TACCTGAAGATACTGGCGATCTGCAGGATGTATCTGGACACCATCGAGAACGTGCAATCG  
AACCTGGAGACGCAGGGACTCAAAGTCTGCAGATGGGCCTGCGGTTTCGGCGGAAACGAT  
GTGGGCTCGGTACCGGAAGGCGCGGAGTAAAGCCAATCGTCGAGGAAGATTTGCGGCGC



GTCATTCGGGACGCCGATTCCGGCCAGTGCAGCGGGATATTTTGTACAGGACAATGTTCTCAACTAGCTTTGGTCTGCGGAATATCGTGAAGGCATTTCCCCGCATCGTATCGCGTAGAATCGGTTGATATTAGAAACCCTAGTAGTCC

>Otu2341

CCAGCCTACGGGATGCTGCAGTGGGGAATCTTGCGCAACGGGCGAAAGCCTGACGCAGCAACGCCGCGTGTGTGATGAAGGTCTTCGGATCGTAAAGCACTGTCGCGAGGGACGAATAGGGCCGGGATAATACTCCGGTTCGATGACGGTACCTCGAGAGGAAGCACCGGCTAACTCTGTGCCAGCAGCCGCGGTAATACAGAGGGTGCAAGCGTTGTTTCGGAATTATTGGGCGTAAAGCGCGTGTAGGCGGCTCAGCAAGTCAGGTGTGAAAGCCCTCGGCTTAACCGAGGAAGTGCGCCTGAAACTATTGAGCTTGAGTGCCGGAGAGGGTGCGGGAATTCCCGGTGTAGAGGTGAAATTCGTAGATATCGGGAGGAACACCAGCGGCGAAGGCGGCCACCTGGACGGTTACTGACGTTGAGACGCGAAAGCGTGGGGAGCAAACAGGATTAGATACCCTAGTAGTCC

>Otu2343

CCAGCCTATGGGATGCAGCAGTCGAGAATCTTCGGCAATGGGGGAAACCCTGACCGAGCGACGCCGCGTGCAGAGATGAAGGCCTTCGGGTGTAAATCGCTGTCGTAGGGGAGGAAATGCTGGTGGGTTCTCCCATCAGTTTGACCTATCCTAGGAGGAAGGACGGGCTAAGTTTCGTGCCAGCAGCCGCGGTAATACGGACCGTCCAAACGTTATTTCGGAATCACTGGGCTTAAAGGGTGCGTAGGCGGTCCGGGAAGTTGGGTGTGAAATACCTCGGCTCAACCGAGGAAGTGCGCCCAAACTGCCGGGCTGGAGGGAGACATAGGTGTGCGGAACCTAGGGTGGAGCGGTGAAATGCGTTGAGATCCTAGGGAACACCAGTAGCGAAAGCGGCACACTGGGTCTCTTCTGACGCTGATGCACGAAAGCTAGGGGAGCGAAGAGGATTAGATACCCCCGTAGTCC

>Otu2344

CCAGCCTACGGGTTGCAGCAGTGGGGAATTTTGCACAATGCCCCGAAAGGGTGATGCAGCAACGCCGCGTGAGGGATGAAGGCCTTCGGGTGCTAAACCTCTTTTCGATCGGGAAAAATGGGTGGTGAATAATCCACCCTGATGGTACCGGAAGAAGAAGCCCCGCGCAACTACGTGCCAGCAGCCGCGGTAATACGTAGGGGGCGAGCGTTGTTTCGGAATTACTGGGCGTAAAGGGCGGTGTAGGCGGTGTGGTAAGTTGGGCGTGAAATCCCCGGGCTTAACCCGGGGGGGCGGTTCAAGACTGCCATGCTAGGGTGTGGGAGAGGGTAGTGGAATTCCCGGTGTAGCGGTGAAATGCGTAGATATCGGGAGGAACACCTGCGGCGAAAGCGGCTACCTGGACCATAACTGACGCTGAGCGCGAAAGCTAGGAGAGCAAACAGGATTAGAGACCCCAGTAGTCC

>Otu2346

CCAGCCTATGGGGTGCTCCAGTGGGGAATTTTGGACAATGGGGGCAACCCTGATCCAGCAATGCCGCGTGAGTGAAGAAGGCCTTCGGGTGTAAAGCTCTTTTGTCCGGGAAGAAACGGTAATTTTTTAATAAAGATTGCTAATGTCGGTACCGGAAGAATAAGCACCGGCTAACTACGTGCCAGCAGCCGCGGTAATACGTAGGGTGCAAGCGTTAATCGGAATTACTGGGCGTAAAGCGTGCGCAGGCGGTTTTATTAAAGTCAGCTGTGAAATCCCCGGGCTTAACCTGGGAATGGCAGTTGAGACTGGTAAGCTGGAGTGTGTCAGAGGGGGGTAGAATTCCACGTGTAGCAGTGAAAATGCGTAGAGATGTGGAGGAATACCGATGGCGAAGGCAGCCCCCTGGGATAACACTGACGCTCATGACGAAAGCGTGGGGAGCAAACAGGATTAGAAACCCCCGTAGTCC

>Otu2347

CCAGCCTATGGGGTGCTCCAGTGGGGAATATTGGACAATGGGCGCAAGCCTGATCCAGCCATGCCGCGTGAGTGATGAAGGCCCTAGGGTTGTAAAGCTCTTTTCGCACGCGACGATGATGACGGTAGCGTGAGAAGAAGCCCCGGCTAACTTCGTGCCAGCAGCCGCGGTAATACGAAGGGGCTAGCGTTGTTTCGGAATTACTGGGCGTAAAGCGCACGCAGGCGGTCTGCATAGTCAGAAGTGAAAGCCCCGGGCTCAACCTGGGAAGTCTTTTGTACTGGCAGGCTTGACTTATGGAGAGGGTAGTGGAATTCCGAGTGTAGAGGTGAAATTCGTAGATATTCGGAAGAACACCAATGGCGAAGGCGACTACCTGGCCATCAAGTGACGCTCATGTGCGAAAGCGTGGGGAGCAAACAGGATTAGAAACCCCAGTAGTCC

>Otu2355

CCAGCCTATGGGAGGCTGCAGTAAGGAATATTGGACAATGGGCGCAAGCCTGATCCAGCAATGCTGCGTGTGTGAAGAAGGCCTTCGGGTGTAAAGCACTTTAAGTTGGGAAGAAAAAATTCACCTAATACGTGGAATCTTGACGGTACCGACAGAATAAGCACCGGCTAACTCTGTGCCAGCAGCCGCGGTAATACAGAGGGTGCAAGCGTTAATCGGATTTACTGGGCGTAAAGCGTGCGTAGGCGGTTTGTTAAGTCGATTGTGAAAGCCCTGGGCTCAACCTGGGAATTGCAGTCGATACTGATGGACTAGAGAACGGTAGAGGGAGGCGGAACTCCAGGTGTAGCGGTGAAATGCGTAGATATCTGGAAGAACACCGATGGCGAAGGCAACCTCCTGGGCCTGTTCTGACGCTGAGGCACGAAAGCGTGGGTAGCAAACAGGATTAGATACCCCCGTAGTCC

>Otu2356

CCAGCCTATGGGGTGCTGCAGTCGAGGATCTTCGGCAATGGGCGCAAGCCTGACCGAGCG  
ACGCCGCGTGTGGGATGAAGGCCCTCGGGTTGTAAACCACTGTCAGAGGGGATGAAATGC  
CATGGGGTTCTCTCCATGGTTTGACATATCCCCAGAGGAAGGACGGGCTAAGTTTCGTGCC  
AGCAGCCGCGGTAATACGAACCGTCCTAACGTTATTTCGGAATCACTGGGCTTAAAGGGCG  
CGTAGGCGGGCGCTACAAGTTGGGTGTGAAAGCCCTCGGCTCAACCGAGGAATTGCGCCCA  
AACTGTAGTGCTTGAGGGAGATAGAGGTGAGCGGAACCTAGGGTGGAGCGGTGAAATGC  
GTTGATATCCTAAGGAACACCTGGGGCGAAAGCGGCTCACTGGATCTCTTCTGACGCTGA  
TGCACGAAAGCTAGGGTAGCGAACGGGATTAGAGACCCGAGTAGTCC

>Otu2357

CCAGCCTATGGGATGCAGCAGTGAGGAATATTGGTCAATGGACGCAAGTCTGAACCAGCC  
ATGCCGCGTGAAAGGAAGAAGGCCCTAAGGGTTGTAACTTCTTTTGTACGGGGGTAATAG  
TTTCTACGCGTAGAGACATGAAAGTACTGTACGAATAAGCGTCGGCTAACTACGTGCCAG  
CAGCCGCGGTAATACGTAGGACGCAAGCGTTATCCGGATTCATTGGGTTTAAAGGGTGCG  
TAGGCGGGCCTTTAAGTCAGTGGTGAAAGTTTGCCGCTTAACGGTAAGATTGCCATTGAT  
ACTGGAGGCCTTGAGTGCATATGAGGTAGGCGGAATGTGTAGTGTAGTGGTGAAATACTT  
AGATATTACACAGAACACTGATTGCGAAGGCAGCTTACTAAGATGCAACTGACGCTGAGG  
CACGAAAGCGTGGGGATCAAACAGGATTAGAAACCCGAGTAGTCC

>Otu2364

CCAGCCTATGGGGGCGAGCAGTGGGGAATATTGCACAATGGGCGAAAGCCTGATGCAGCG  
ACGCCGCGTGAGGGATGACGGCCTTCGGGTGTAAACCTCTTTTACAGCAGGGAAGAAGCGG  
CAGTGATTTTTTACGGCGTGACGGTACCTGCAGAAGAAGCACCGGCTAACTACGTGCCAG  
CGGCCGCGGTAATACGTAGGGTGCGAGCGTTGTCCGGAATTATTGGGCGTAAAGAGCTCG  
TAGGCGGCTTGTTCGCGTCGGATGTGAAAGCCCGGGGCTTAACTCCGGGTCTGCATTGAT  
ACGGGCAGGCTAGAGTGTGGTAGGGGAGATCGGAGTTCCTGGTGTAGCGGTGAAATGCGC  
AGATATCAGGAGGAACACCGGTGGCGAAGGCGGATCTCTGGGCCATTACTGACGCTGAGG  
AGCGAAAGCGTGGGGAGCGAACAGGATTAGATACCCTCGTAGTCC

>Otu2368

CCAGCCTACGGGGCGCTCCAGTAAGGAATATTGGGCAATGGACGCAAGTCTGACCCAGCC  
ATGCCGCGTGAAAGGATGACGGCCCTACGGGTGTAAACCTCTTTTGTACGGGAAAAAACC  
CCTGATCGTGTATCAGGGTTGATGGTACCGTAAGAATAAGCATCGGCTAACTCCGTGCCA  
GCAGCCGCGGTAATACGGAGGATGCAAGTGTTATCCGGATTCATTGGGTTTAAAGGGTGC  
GTAGGCGGGATGGTAAGTCAGTGGTGAAATCCTACAGCTTAACTGTAGAACTGCCATTGA  
TACTGCCAACCTTGAGTACATTTGAAGTGGGCGGAATGTGTGGTGTAGCGGTGAAATGCT  
TAGATATCACACAGAACACCGATAGCGAAGGCAGCTCACTAAACTGTAACCTGACGCTGAG  
GCACGAAAGCGTGGGGATCAAACAGGATTAGAAACCCCTGTAGTCC

>Otu2370

CCAGCCTATGGGTTGCACCAGTGGGGAATTTTTCGCAATGGGGGAAACCCTGACGCAGCA  
ACGCCGCGTGAGGATGAAATATCTTGGTATGTGAACTCCTTTTCGATGGGGAAGATTATG  
ACGGTACCTGCAAAAGCAGCTGCGGCTAACTACGTGCCAGCAGCCGCGGTAATACGTAGG  
CAGCAAGCGTTGTTTCGGAGTTACTGGGCGTAAAGGGTGTGTAGGCGGCTTTTTAAGTTTG  
GTGTGAAATCTCCCGGCTCAACTGGGAGGGTGCGCCGAATACTGAGAGGCTAGAGTGTGG  
GAGAGGAAAGTGGAATTCCTGGTGTAGCGGTGAAATGCGTAGATATCAGGAGGAACACCG  
GTGGTGTAAACGGCTTTTCTGGACCATAACTGACGCTGAGACACGAAAGCGTGGGTAGCAA  
ACAGGATTAGAAACCCCTGTAGTCC

>Otu2371

CCAGCCTATGGGGGCGAGCAGTCGAGAATCTTCCGCAATGGACGAAAGTCTGACGGAGCG  
ACGCCGCGTGAGGATGAAGTTCTTCGGAACGTAAACTCCTTTTTCGATGGGGAAGATTATG  
TTGATTGTACCTGGAGAATAAGAAGTTGCTAAACTCGTGCCAGCAGCAGCGGTAATACGA  
GTGCTTCAAGCGTTATCCGGAATCATTGGGCGTAAAGGGTGTGTAGGCGGTTTTTGTAGT  
CTCGCGTAAAATCTTTTCGGCTCAACCGAGAGTCCGCGTGGGAAACGGCAAGACTAAGAGG  
ATGGAAGGGGTCTTTGGAACCTCATGGTGTAGCGGTGAAATGCGTTGATATCATGGGGAAC  
ACCGAAAGCGAAGGCAAAAGACTGGTCCACTCCTGACGCTGAAACACGAAAGCGTGGGT  
CGAATGGGATTAGAAACCCCGTAGTCC

>Otu2374

CCAGCCTACGGGATGCAGCAGCTAAGAATATTCCGCAATGGACGAAAGTCTGACGGAGCG  
ACGCCGCGTGAGTACGAAGGCCGAAAGGTGTAAATCCTTTTGTGGGGAAGAATAAG  
CGTGGAAGGAAATGTCCGCGTGATGACATGAACCGGTGAATAAGTCCCGGCTAACTACGT  
GCCAGCAGCCGCGGTAACACGTAGGGGATAAGCGTTGTTTCGGAATTATTGGGCGTAAAGG

GCATGTAGGCGGTTTTGTAAAGCCTGGCGTGAAATCCTGCAGCTTAACTGCGGAACTGCGC  
TGGGAACTGCGAGACTCGAATCACTGAGGGGAGATAGAATTCCAGGTGTAGGGGTGAAA  
TCTGTAGATATCTGGAAGAATACCGGTGGCGAAGGCGATCTCCTGGCAGATGATTGACGC  
TGAGGTGCGAAAGCGTGGGGAGCAAACAGGATTAGAAACCCCGTAGTCC

>Otu2375

CCAGCCTACGGGTCGCAGCAGTCGAGAATCATTCGCAATGGGCGAAAGCCTGACGATGCG  
ACGCCGTGTGAGCGATGAAGGCCTTAGGGTCGTAAAGCTCTTTCGCTTGGGAACAAGAGG  
ATCCGGCTAATATCCGGTCGATTTGAGTGTACCAGGTAAAGAAGCACCGGCTAACTCCGT  
GCCAGCAGCTGCGGTAATACGGAGGGTGCAAGCATTAAATCGGATTTATTGGGCGTAAAGG  
GCGCGTAGGCTGGTTTTGTAAAGTCAGATGTGAAATCCCGGGGCCCAACCTCGGAACAGCAT  
TTGAGACTGCATACCTAGAGGGTAGGCGGAGAAAACGGAATTCACAAGTAGCGGTGAAA  
TGCGTAGATATGTGGAAGAACACCGGTGGCGAAGGCGGTTTTCTAGCTTACTCCTGACGC  
TGAGGCGCGAAAGCAAGGGGATCAAACAGGATTAGAAACCCGAGTAGTCC

>Otu2378

CCAGCCTACGGTGGGCAGCAGTGGGGAATATTGGACAATGGGGGAAACCTGATCCAGCG  
ATGCCGCGTGTGTGAAGAAAGCCTGAGGGTTGTAAAGCACTTTAGTGGGGGAGGAGTAGT  
ATCTGGTTAATAACTGGATATGAGGACGTTACCCTAAGAATAAGCACCGGCAAACCTCTGT  
GCCAGCAGCCGCGTAATACAGAGGGTGCAAGCGTTAATCGGAATGACTGGGCGTAAAGG  
GTACGTAGGTGGAGGAATAAGTATCATGTGAAAGTCCTGGGCTCAACCTGGGGATGGCAT  
GGTAGACTGTTTTTCTGGAGTGCAGTAGAGGTAAGGGGAATTTCCGGTGTAGCGGTGAAA  
TGCGTAGAGATCGGGGGGAACACCTGTGGCGAAGGCGCCTTACTGGGCTGTAACCTGACAC  
TGAGGTACGAAAGCGTGGGGAGCAAACAGGATTAGAAACCCGCGTAGTCC

>Otu2379

CCAGCCTACGGGTCGCACCAGTAAGGAATATTGGTCAATGGGCGCAAGCCTGAACCAGCC  
ATGCCGCGTGAAGGATAAAGGTCCTCTGGATTGTAAACTTCTTTTATTTGGGACGAAAAA  
TGGGGATTCTTCTCACCTGACGGTACCAGATGAATAAGCACCGGCTAACTCCGTGCCAG  
CAGCCGCGGTAATACGGAGGGTGCAAGCGTTATCCGGATTCAGTGGGTTTAAAGGGTGCG  
TAGGCGGGCAGTTAAGTCAGTGGTGAAATCTTTGGGCTTAACCCGGAACCTGCCATTGAT  
ACTATCAGTCTTGAATATTGTGGAGGCCTGCGGAATATGTCATGTAGCGGTGAAATGCTT  
AGAGATGACATAGAACACCAATTGCGAAGGCAGCAGGCTACGCATATATTGACGCTGAGG  
CACGAAAGCGTGGGGATCAAACAGGATTAGATACCCTTGTAGTCC

>Otu2381

CCAGCCTACGGGTCGCTGCAGTCGAGAATCTTCCGCAATGGACGAAAGTCTGACGGAGCG  
ACGCCGCGTGAGGATGAAGTGCTTCGGCATGTAAACTCCTTTTGCCAGGGAAAAAGTTA  
TTGATGGTACCTGGAGAATAAGAGGTTGCTAAACTCGTGCCAGCAGCAGCGGTAATACGA  
GTGCCTCGAGCGTTATCCGGAATTATTGGGCGTAAAGGGTGTGTAGGTGGTTTCGTTAGT  
CTTCCGTAAAATCTCTCGGCTCAACCGGGAACCTCGCGGAGGAAACGGCGAGACTAAGAGG  
ACGGTAGAGGTTTCTGGAACCTCATAGTGTAGCGGTGAAATGCGTTGATATTATGGGGAAC  
ACCAAAAGCGAAGGCAAGAAACTGGACCGCTCCTGACACTGAAACACGAAAGCGTGGGTC  
GCGAATGGGATTAGATACCCCAGTAGTCC

>Otu2383

CCAGCCTATGGGTCGCAGCAGTGGGGAATATTGCTCAATGGGGGAAACCTGAAGCAGCA  
ACGCCGCGTGAGTGATGAAGGCCTTCGGGTCGTAAAGCTCTGTTGTACGGGGCGAATGTG  
CTTATGGCTAACATCCATAGGCAGTGACAGTACCGTATAAGAAAGGACCGGCTAACTTCG  
TGCCAGCAGCCGCGGTAAGACGGGGGGTCCAAGCGTTGTTTCGGAATCATTGGGCGTAAAG  
CGTGTGCAGGTGGTCTTGTAAGTTGGATGTGAAAGCCCCGAGCTTAACTCGGGAAGTGCA  
TTCAAACTGCAAGACTTGAGTATGGAAGAGGGTTGTGGAATTCCAGGTGTAGTGGTGAA  
ATACGTAGATATCTGGAGGAACACCGGTGGCGAAAGCGGCAACCTGGTCTTACTGCGCA  
CTCATACAGGAAAGCGTGGGGATCAAACAGGATTAGATACCCCGTAGTCC

>Otu2386

CCAGCCTACGGGGGGCTGCAGTCGAGAATTTTTCTCAATGGGCGAAAGCCTGAAGGAGCG  
ACGCCGCGTGGGGGATGAAGGGCTTCGGCTCGTAAACCCCTGTCATTTGCGAACAACCT  
TACGATTTAACAGATCGTGAGCTGATTGTAGCGAAAGAGGAAGGGACGGCTAACTCTGTG  
CCAGCAGCCGCGGTAATACAGAGGTCCCAAGCGTTGTTTCGGATTCAGTGGGCGTAAAGGG  
TGCGTAGGTGGCAAGGTAAGTTTGGTGTGAAATCTCGGGGCTCAACTCCGAAACTGCACT  
TGATACTGCCTTGCTAGAGTACTGGAGAGGAGATTGGAATTTACGGTGTAGCAGTGAAAT  
GCGTAGATATCGTAAGGAAGACCAGTGGCGAAGGCGAATCTCTGGACAGTTACTGACGCT  
GAGGCACGAAGGCCAGGGGAGCAAACGGGATTAGATACCCCAGTAGTCC

>Otu2387

CCAGCCTATGGGTTGCTCCAGTAGGGAATATTGCGCAACGGGGGAAACCCTGACGCAGCG  
ACGCCGCGTGAGTGATGAAGGCTTTAGGGTCGTAAAGCTCTGTTGTACGAGAAGAAACAA  
ATGACGGTATCGTACAAGAAAGGACCGGCTAACTTCGTGCCAGCAGCCGCGGTAATACGA  
GGGGTCCTAGCGTTGTTTCGGAATTATTGGGCGTAAAGGGTGTGTAGGCTGCTAGGTAAAGT  
CAGTTGTGAAAGCCCCGGGCTCAACCCGGGAAGTGCTTCTGATACTGCTTAGCTTGAGTA  
CTGGAGAGGATAGTGAATTCCAGGTGTAGTGGTGAAATACGTAGATATCTGGAGGAACA  
CCGGTGGCGAAGGCGGCTATCTGGCCATGTACTGACGCTGAGACACGAAAGCGTGGGGAG  
CAAACAGGATTAGAAACCCTAGTAGTCC

>Otu2388

CCAGCCTACGGGTCGCAGCAGTGAGGAATTTTTCGCGCAATGGCCGCAAGGCTGACGCAGCA  
ACGCCGCGTGGGTGAAGAAGGCCTTCGGGTCGTAAAGCCCTGTCAGGTGGGAAGAAAGGT  
CTTGAGTGAACGCTTGCGGATTGACGGTACCACCAGAGGAAGCACCGGCTAACTCCGTGC  
CAGCAGCCGCGGTAATACGGAGGGTGCAAGCGTTATTTCGGAATTACTGGGCGTAAAGCGC  
GTGTAGGCGGGGTACAAGTCTGATGTGAAAGCCCCGGGCTTAACCTGGGAAGTGCATTG  
GAGACGGTATCTCTTGAGTACTGGAGAGGAAGGGGGAATTCCTGGTGTAGAGGTGAAATT  
CGTAGAGATCGGGAGGAATACAGTGGCGTAGGCGCCTTTCTGGACGGTACTGACGCTG  
AGACGCGAAAGCGTGGGGAGCAAACAGGATTAGATACCCGCGTAGTCC

>Otu2390

CCAGCCTATGGGAGGCTGCAGTAGGGAATATTGGACAATGGGCGCAAGCCTGATCCAGCC  
ATCCCGCGTGAGGATTAAGGTCCCTATGGATTGTAAACTCTTTTCTCTGGGAATAAAAA  
GTGGGATTCATTCCCGCCTTGAAGGTACCAGAGGAATAAGCACCGGCTAACTCCGTGCCA  
GCAGCCGCGGTAATACGGAGGGTGCAAGCGTTATCCGGATTCACTGGGTTTAAAGGGTGC  
GTAGGTGGCTTTGTAAAGTCAGTGGTGAAATATTACGGCTCAACCGTAAACTGCCATTGA  
TACTGCTTAGCTTGAATCAGGTCGAGGTGGATGGAATATTACATGTAGCGGTGAAATGCT  
TAGATATGTAATAGAACACCGATTGCGAAGGCAGTTCACTAGGCCTGAATTGACACTGAG  
GCACGAAAGCGTGGGGATCAAACAGGATTAGAGACCCTCGTAGTCC

>Otu2392

CCAGCCTATGGGGTGCAGCAGTCGAGGATCTTCGGCAATGGGCGCAAGCCTGACCGAGCG  
ACGCCGCGTGTCGATGAAGGCCTTCGGGTGTAAAGCACTGTGAGGGGGAGGAAGCCG  
CAAGGTTGACCTATCCCTGGAGGAAGCACGGGCTAAGTTCGTGCCAGCAGCCGCGGTAAG  
ACGAACCGTGCGAACGTTGTTTCGGAATCACTGGGCTTAAAGGGCGCGTAGGCGGGCCACC  
AAGTCCGGGGTGAAATCCTCCGGCTTAACCGGAGAATTGCCTGGGATACTGGTGGTCTTG  
AGGGAGGTAGGGGCACGCGGAACCTCCGGTGGAGCGGTGAAATGCGTTGATATCGGAAGG  
AACGCCGGTGGCGAAAGCGGCGTGCTGGCCCTCTTCTGACGCTGAGGCGCGAAAGCCAGG  
GGAGCGAACGGGATTAGAAACCCGCGTAGTCC

>Otu2394

CCAGCCTATGGGTGGCAGCAGTCGAGAATAGTCTACAATGGACGAAAGTCTGATAGTGCG  
ACGCCGCGTGACGAAGAAACCTTTTCGGGGTGTAAGTTCTTTTCTGTGCGAGCAGGGGT  
GGATAGAGTAATATGCTGTTTCATCTGGATATTAGTACAGGAATAAGCCACGGCTAACTCC  
GTGCCAGCAGCCGCGGTAACACGGGGGTGGCAAGCGTTGTCCGGAATTACTAGGCGTAAA  
GGGCAGGTAGGCGGGTCTATAAGTCGACGTTAAAGCCTCAATCTTAAGTTGAGAAATGC  
GTTTGATACTGTAGGTCTTGAATGCGGTGGGGGAAGACGGAATTCCAGGTGTAGCGGTGG  
AATGCGCAGATATCTGGAGGAACACCGAAGGCGAAGGCAGTCTTCTATACCGTAATTGAC  
GCTAAACTGCGAAGGTGGGGGATCAAACAGTATTAGAAACCCTAGTAGTCC

>Otu2396

CCAGCCTACGGGTGGCAGCAGTGTTGGAATATTGGACAATGGACTAAAATGTCTGATCCAG  
TTACATCTCTCGGGTGATTGACGGCGATTGCCGTAAACTGAACGGCTGATAATCTTGAT  
CTTGACTAAAGAAGATTATTGGTATTAAATAGTCCAGGGCAACCTCTGTGCCAGCAGCCG  
CGGGAATACAGAGTGGACAAGTGTTACCCATCCTAACTGGGCATAAAGAGTGCCTAGATG  
GATATTAAAGAAATGGCTAAAAGAAAATTGCTGTAATGGGTAGAGATTTTATAGCAGCGGA  
TATCTTTGAGAAATGAATAGGTACTAGTATACATGAAGGATTTGATTTAGGAAATTGTC  
GATCTCATGGGGACTACCAATAGCGAAGGCGTTTAAACCAATCATAATCTGACATTAAGGC  
ACGAACTCGTGGGTAGCAAGCGGGATTAGATACCCTTGTAGTCC

>Otu2397

CAGCCTACGGGTTGCAGCAGTGAGGAATATTGGTCAATGGGTGCAAGCCTGAACCAGCCA  
TGCCGCGTGACAGGATTAAGGCCCTATGAGTTGTAAACTGCTTTTATACAGGACGAAACTC  
TCGAACGTGTTTCGGGATTGACTGTACTGTAAGGATAAGGATCGGCTAACTCCGTGCCAGC

AGCCGCGGTAATACGGGGGATCCAAGCGTTATCCGGATTTACTAGGTTTAAAGGGTGCGT  
AGGCGGGATAGTAAGTCAATGGTGAGATCCTACAGCTTAACTGTAGAATTGCCTTTGATA  
CTGCTGTTCTTGAGTATAGATGAGGTGGGCGGAATGTGTCAAGTAGCGGTGAAATGCTTA  
GATATGACACAGAACTCCAATTGCGTAGGCAGCTCACTAACTTAATACTGACGCTGAGGC  
ACGAAAGCGTGGGGAGCAAACAGGATTAGATACCCTAGTAGTCC

>Otu2404

CCAGCCTATGGGAGGCAGCAGTAACGAATATTCCGCAATGCGCGAAAGCGTGACGGAGCA  
ATGCCGCGTGACAGGATGAAGCGGTTTCGCCGTGTAACTGCTGTCAGGGGCGAGAAATAC  
TGATCAGCCCCAGAGGAAGGACCGGCTAAACTCGTGCCAGCAGCCGCGGTAAGACGAGTG  
GTCTAGCGTTAGTCGGAATCACTGGGCTTAAAGGGTGCGTAGGTGGGCTTGTAAGTGCC  
TTGTGAAAGCCCTCGGCTCAACCGAGGAACTGCAGGGCATACTGCACGCTTGAGGAAAC  
TAGAGGCCGGTAGAACGATAGGTGGAGCGGTGGAATGCGTAGAGATCTATCGGAATGCCG  
AAGGTGAAGACAGCCGGCTGGGGTTTTCTTGACACTGAGGCACGAAAACGTGGGGATCAA  
ACAGGATTAGAGACCCCCGTAGTCC

>Otu2407

CCAGCCTATGGGGCGCTGCAGTCGAGAATTTTTTCACAATGGGCGCAAGCCTGATGGAGCG  
ACGCCGCGTGGGGGATGAAGGGTTTCGATCCGTAAACCCCTGTCATTTGCGAACAAACCT  
CGTCCGATAACACCGGACGAGCTGATAGTAGCGGAAGAGGAAGGGACGGCTAACTCTGTG  
CCAACAGCCGCGGTAATACAGAGGTCCCAAGCGTTGTTTCGATTCACTGGGCGTAAAGGG  
TGCGTAGGTGGCCGGGTAAAGTTCGGTGTGAAATCTCGGAGCTCAACTCCGAAATGGCATC  
GAATACTATCCGGCTGGAGGGTTCGAGGGGAGACTGGAATTCTCGGTGTAGCAGTGAAAT  
GCGTAGATATCGAGAGGAACACCAGTGGCGAAGGCGAGTCTCTGGACGACTCCTGACACT  
GAGGCACGAAAGCCAGGGGAGCAAACAGGATTAGAGACCCGTGTAGTCC

>Otu2411

CCAGCTACGGGGCGCTCCAGTGAGGAATATTGGGCAATGAGCGAAAGCTTGACCTAGTAA  
TGGTTCAAGAGTGAGAAATAGACGGCATTATCGCTGTAAAGCTCTTTCAAAAATGAAGAT  
AATGACTGTAGTTTTAAGAATAAGCACTGGCTAATTCTGTGCCAGCAGCCGCGGTAATACA  
GGGAGTGCAGACGTTATTTCGGATGAAATTGGTGTAAAGTATATGTAGGCGGCTTTTTTGA  
CTTTTTTAAAAATACTAGAATTAATCTTTTAAAAAATAATGTAATCGAAAGCTAAGAGT  
TTAAGAAAGGTTGAAAGAATTTCTTGTCTAAGGGTTGAATCTTTAAAAATAAGGACGACT  
ACCAAATAGTAGCGAAAGCATTTCTTCTGGCTTAATACTGACGCTGAGATATGAAAGTTT  
AGGGATCAAACAGGATTAGATACCCGTGTAGTCC

>Otu2416

CCAGCCTATGGGTTGCAGCAGTGAGGAATTTTTCGCAATGGGAGCAATCCTGACGCAGCA  
ACGCCGCGTGGGTGACGAAGGCCTTCGGGTCGTAAAGCCCTGTCAGGTGGGAAGAATGGG  
CATAAGGCGAACAGCCTTGTGTTTTGACGGTACCACCAGAGGAAGCACCGGCTAACTCCG  
TGCCAGCAGCCGCGGTAATACGGAGGGTGCAGCGTTATTTCGGAATTACTGGGCGTAAAG  
CGCGTGCAGGCGGGTATGCAGGTCTGATGTGAAAGCCCCGGGCTCAACCCGGAAGAGCA  
TTGGAACGGCATATCTTGAGTGCTGGAGAGGAAGGGGAATTCCCGGTGTAGAGGTGAA  
ATTCGTAGAGATCGGGAGGAATACCAGTGGCGAAGGCGCCCTTCTGGACGGCAACTGACG  
CTGAGACGCGAAAGCGTGGGGAGCAAACAGGATTAGATACCCCGTAGTCC

>Otu2418

CCAGCCTATGGGGTGCTGCAGCCGAGAATTTTTCTCAATGGGCGAAAGCCTGAAGGAGCG  
ACGCCGCGTGGGGGATGAATGGCTTCGGCCCGTAAACCCCTGTCATTCGGGATCAATGCT  
TTTCACTTAACACGTGAACAGTTGATAGTACCGGAAGAGGAAGGGACGGCTAACTCTGTG  
CCAGCAGCCGCGGTAATACAGAGGTCCCAAGCGTTGTTTCGATTCACTGGGCGTAAAGGG  
TGCGTAGGTGGTAGGGCAAGTCCGGCGTGAAATCTCCGAGCCTAACTCGGAAATGGCGTC  
GGAACTGCCCAACTAGAGGATTGGAGGGGAGACTGGAATACTTGGTGTAGCAGTGAAAT  
GCGTAGATATCAAGTGGAACACCAGTGGCGAAGGCGAGTCTCTGGACAATTCCTGACACT  
GAGGCACGAAAGCTAGGGGAGCAAACGGGATTAGAGACCCGAGTAGTCC

>Otu2419

CCAGCCTACGGGGGGCAGCAGTGGGGAATATTCTGCAATGAGCGAAAGCTTGACAGAGCA  
ATACCGCGTGAAGGAAAACGACCTAAGGGTTGTAACTTCTTTTCTCAAAAAGAAATTT  
GACATTATTTGAGGAATAAGCATCGGCAAAACCCTGTGCCAGCAGCCGCGGCAAGACAGGG  
GATGCAAGCGTTATCCGGAATTATTGGGCGTAAAGCGTCTGTAGATCGAAACTTAAGTCT  
TTTGTAAATTTTAAGGCTTAACCTTAACTCGCAAAAGAACTAAATTTCTGGAGTCTG  
GTAGAGGCAAAGGGAACCTTTCAGTGGAGCGGTGAAATGCGGAGATATTGAAATGAAGGCC  
AAAAGCGAAGGCACCTTGCTAGACCTGTACTAACATTGAGAGACGAAAGCTAGGGGAGCG

ATGCAGATTAGAAACCCCTTGTAGTCA

>Otu2420

CCAGCCTATGGGGCGCTCCAGTCGAGAATCTTCGGCAATGGGCGCAAGCCTGACCGAGCG  
ACGCCGCGTGAGGACGAAGGCCTTCGGGTGTAAACTCCTGTTCGAGGGGAAAGAAGGCC  
CGTAAGGGCTTGACTGATCCCTGGAGGAAGCACGGGCTAAGTTCGTGCCAGCAGCCGCGG  
TAAGACGAACCGTGCGAACGTTATTCGGAATCACTGGGCTTAAAGCGCGTGTAGGCGGGA  
CGGCACGTCGGTCGCTGAAATCCCCCGGCTCAACCGGGGAACGGGCACCGATACGACCGC  
CCTCGAGGGGCGTAGGGGGACCTGGAACCTCCGGTGGAGCGGTGAAATGCGTTGAGATCG  
GAAGGAACGCCCGTGGCGAAAGCGAGGTCTGGACGCTTACTGACGCTGAGACGCGAAAG  
CCAGGGGAGCGAACGGGATTAGATACCCGGGTAGTCC

>Otu2423

CCAGCCTATGGGGTGCTGCAGTCGAGGATCTTCGGCAATGGGCGCAAGCCTGACCGAGCG  
ACGCCGCGTGCGCGATGAAGGCCTTCGGGTGTAAAGCGCTGTTCGAGGGGGAGAAAGCTT  
CGCAAGGAGTTGATCGACCCCTGGAGGAAGCACGGGCTAAGTTCGTGCCAGCAGCCGCGG  
TAAGACGAACCGTGCGAACGTTATTCGGAATCATTGGGCTTAAAGGGCGCGTAGGCGGGC  
CAGCAAGTCAGGGGTGAAATCTTTTCAGCTCAACTGGAAAAGTGCCTTTGATACTGCTGGC  
CTCGAGGGAGATAGGGGCGTGCGGAACCTCCGGTGGAGCGGTGAAATGCGTAGATATCGG  
AAGGAACGCCCGTGGCGAAAGCGGCGCGCTGGATCTCTTCTGATGCTGAGGCGCGAAAGC  
CAGGGGAGCAAACGGGATTAGAAACCCCTCGTAGTCC

>Otu2424

CCAGCCTATGGGGGGCTCCAGTAGGGAATATTGCGCAATGGGGGAAACCCCTGACGCAGCG  
ACGCCGCGTGCGTGATGAAGGCCTTAGGGTCGTAAAGCTCTGTTGTACGGGAAGAAAAAA  
ATGACGGTACCGTATAAGAAAGGATCGGCTAACTTCGTGCCAGCAGCCGCGGTAATACGA  
GGGATCCTAGCGTTGTTTCAGAATCATTGGGCGTAAAGGGTGTGTAGGCGGCTAGGCAAGT  
CAGTTGTGAAAGCCCCGGGCTCAACCCGGGAAGTGCTTCTGATACTGCTTAGCTTGAGTA  
CTGGAGAGGTGAGTAGAATTCCAGGTGTAGTGGTGAAATACGTAGATATCTGGAGGAATA  
CCGGTGGCGAAGGCGGCTCACTGGCCATGTACTGACGCTGAAACACGAGAGTGCGGGGAT  
CAAACAGGATTAGATACCCTCGTAGTCC

>Otu2427

CCAGCCTACGGGTGGCAGCAGTGGGGAATATTGGACAATGGGCGCAAGCCTGATCCAGCC  
ATGCCGCGTGAGTGATGACGGCCTTAGGGTGTAAAGCTCTTTTCGCACGCGACGATAATG  
ACGGTAGCGTGAGAAGAAGCCCCGGCTAACTTCGTGCCAGCAGCCGCGGTAATACGTAGG  
CAGCAAGCGTTGTTTCGGAGTTACTGGGCGTAAAGGGTGCGTAGGCGGCTCTATAAGTATG  
GTGTGAAATCTCCCGGCTCAACTGGGAGGGTGCGCCGTAGACTGTGGGGCTAGAGTGTGG  
GAGAGGAAAGTGGAATTCCTGGTGTAGCGGTGAAATGCGTAGATATCAGGAGGAACACCG  
GTGGTGTAAACGGCTTTCTGGACCATAACTGACGCTGAGGCACGAAAGCGTGGGTAGCAA  
ACAGGATTAGATACCCTTGTAGTCC

>Otu2429

CCAGCCTATGGGGGGCACCAGGGGGGGATCTTGGTCAATGGGGGAAACCCCTGAACCAGCG  
ACGCCGCGTGAGGGAAGAAGGTCTTTGGATCGTAAACCTCTTTTGCCAGGGAAGATGATG  
ACGGTACCTGGCGAATAAGCCCCGGCTAACTACGTGCCAGCAGCCGCGGTAATACGTAGG  
GGGCGAGCGTTGTCCGATTTACTGGGCGTAAAGAGCGCGTAGGCGGTCTGAAGAGTCGG  
CTGTGAAATCTCTGGGCTCAACCCAGAGGGGTGGGCCGAGACCTTTGGACTTGAGGGTGG  
TAGAGGAAGGTGGAATTCGGGTGTAGTGGTGAAATGCGTAGAGATCCGGAGGAACACCA  
GTGGCGAAGGCGGCCTTCTGGGCCAAACCTGACGCTGAGGCGCGAAAGCGTGGGGAGCGA  
ACCGAATTAGATACCCCGTAGTCC

>Otu2432

CCAGCCTATGGGGTGCTCCAGTGGGGAATATTGGACAATGGGGGAAACCCCTGATCCAGCG  
ACGCCGCGTGTTGAAGAAGGCCTGCGGGTGTAAAGCACTTTTAGTGGGGACAAAAAGT  
CACGGGCTAACACCGCGTGATCTTGATTTAACCACAGAAAAAGCACCGGCTAACTCTGT  
GCCAGCAGCCGCGGTAATACAAAGGTGCGAGCGTTAATCGGAATTACTGGGCGTAAAGC  
GTGCGCAGGCGGTTATGTAAGACAGATGTGAAATGCCCGGGCTTAACCTGGGAACTGCAT  
TTGTGACTGCATGGCTAGAATCTGGCAGAGGGGGGTAGAATTCACGTGTAGCAGTGAAA  
TGCGTAGATATGTGGAGGAATACCGATGGCGAAGGCAGCCCCCTGGGCTAAGATTGACGC  
TCATGCACGAAAGCGTGGGGAGCAAACAGGATTAGATACCCAGTAGTCC

>Otu2433

CCAGCCTATGGGTCGCTGCAGTCGCGAATCATTCACAATGGGCGCAAGCCTGATGATGCC  
ACGCCGCGTGCGGGATGAAGGCCTCTGGGTGTAAACCGCTGTCAATGGAGGGGAAACG

TATGGTGTAAACAGCGCCATGCTTGACTGCTCTGTAAAGGAAGCCCCGGCAAAACATGTG  
CCAGCAGCCGCGGTAATACATGTGGGGCAAGCGTTGTTTCGGAATTACTGGGCATAAAGGG  
TGCGTAGGCGGCATGCCAAGTCAGGGGTGAAAGGTTTTCGGCCCAACCGGGACAGTGCCTT  
TGATACTGGCGTGCTTGAGTGCGTGAGGGGTGACTGGAACGAGTGGTGTAGCGGTGAAAT  
GCGTAGATATCACTCGGAAGGCCAACGGCGAAGGCAGGTCACTGGTACGCAACTGACGCT  
GAGGCACGAAAGCGTGGGGAGCAAACAGGATTAGAAACCCTAGTAGTCC

>Otu2434

CCAGCCTATGGGTCGCTGCAGTGAGGAATATTGCTCAATGGACGAAAGTCTGAAGCAGCG  
ACGCCGCGTGAGGGATGAAATCCGTTAGGATGTAAACCTCTTTTCTGAGGGACGAACAAG  
ATGCCTTGAGCATCTCTGACGGTACCTCAGGAATAAGGATCGGCCAACTACGTGCCAGCA  
GCCGCGGTAATACGTAAGATCCGAGCGTTGTCCGGAATTACTGGGTGTAAAGGGTCTGCA  
GGCGGGCAAATAAGTCGGTGGTGAAATCCTATAGCTCAACTATAGAACTGCCTCCGATAC  
TATTTGTCTTGAGTTCGAGAGAGGGTAATGGAATTCATGGTGTAGCGGTGAAATGCGTAG  
ATATCATGAAGAACACCGGTTGCGAAGGCGATTACCTGGCTCGACACTGACGCTCAGGGA  
CGAAAGCGTGGGGATCAAACAGGATTAGAAACCCTAGTAGTCC

>Otu2437

CCAGCCTACGGGTGGCTCCAGTGGGGAATATTGGACAATGGGGGCAACCCTGATCCAGCA  
ATGCCGCGTGAGTGATGAAGGCCTTCGGGTTGTAAAGCTCTTTCGCCCACGACGATGGTG  
ACGGTAGTGGGAGAAGAAGCCCCGGCTAACTTCGTGCCAGCAGCCGCGGTAATACGAAGG  
GGCGGAGCGTTGTTTCGGAATTACTGGGCGTAAAGGGCGCGTAGGCGGCTCATGAAGTCAG  
GCGTGAAAGCCCCGGGCTCAACCTGGGAATTGCGTTTGATACTCGAGAGCTAGAGTTCGG  
GAGAGGAGAGTGGAATTCACAGTGTAGAGGTGAAATTCGTAGATATTGGGAAGAACACCG  
GTGGCGAAGGCGGCTCTCTGGACCGATACTGACGCTGAGGCGCGAAAGCGTGGGGAGCAA  
ACAGGATTAGAAACCCTAGTAGTCC

>Otu2438

CCAGCCTATGGGGCGCAGCAGTCGAGAATTTTTCACAATGGGGGAAACCCTGATGGAGCG  
ACGCCGCGTGAGGATGAAGGTTTTTCGGATTGTAAACTCCTGTCACCACAGAACAAGATT  
ACCGGTTCCAATAAAGCCAGTGATTGATGGTATGTGGAGAGGAAGGGACGGCTAACTCTG  
TGCCAGCAGCCGCGGTAATACAGAGGTCCCGAGCGTTGTTTCGGATTTCATTGGGCGTAAAG  
GGTGTGTAGGAGGTTCGTGTAAGTCAGGCGTGAAATCTCACCGCTTAACGGTGAAATTGCG  
TTTGATACTGCTCGGCTAGAGGATTTGAGGGGGTAACGGAATTCCTTGGTGTAGCAGTGAA  
ATGCGTAGATATCAAGAGGAACACCAGTGCGCAAGGCGGTTACCTGGAAAATTCCTGACT  
CTGAAACACGAAAGCTAGGGGAGCAAACGGGATTAGATACCCGAGTAGTCC

>Otu2439

CAGCCTATGGGTTGCTGCAGTAGGGAATATTGGACAATGGGCGAGAGCCTGATCCAGCCA  
CGCCGCGTGAGTGATGAAGGCCTTCGGGTCGTAAAGCTCTGTTGTACGGGAAGAACGCGG  
ATATGGCTAACATCCATATCCAGTGACGGTACCGTATAAGAAAGGACCGGCTAACTTCGT  
GCCAGCAGCCGCGGTAAGACGGGGGTCCTAGCGTTGTTTCGGAATCATTGGGCGTAAAGC  
GTGTGCAGGTGGTCTTGAAAGTTGGATGTGAAAGCCCCGGGCTTAACTCGGGAAGTGCAT  
TCAAACTACAAGACTTGAGTAAGGAAGAGGTTTCGTGGAATTCCTGGTGTAGTGGTGAAA  
TACGTAGATATCAGGAGGAACACCGGCGGCGAAGGCGGCGAAGTGGTTCCTATACTGACAC  
TCATACACGAAAGCGTGGGGATCAAACAGGATTAGATACCCGTGTAGTCC

>Otu2440

CCAGCTATGGGTGGCTGCAGTAGGGAATATTGCACAATGGAGGAAACTCTGATGCAGCGA  
CGCCGCGTGAGTGACGAAGGCCTTCGGGTTGTAAAGCTCTGCTCTCAGGGAAAAAGCAAG  
TGATTGTACCTGAGGAGAAAGACCGGCTAACTTCGTGCCAGCAGCCGCGGTAAGACGAG  
GGGTCCAAGCGTTGTTTCGGAATCATTGGGCGTAAAGCGAGTGTAGGTGGCTCTATAAGTC  
AGAAGTGAAAGCCCTGGGCTCAACCCAGGAAGTGCTTTTGATACTGCAGAGCTTGAATGT  
GGGAGAGGATCGTGGAATTCAGGTGTAGTGGTGAAATACGTAGATATCTGGAGGAACAC  
CGGTGGCGAAGGCGGCGATCTGGCCCAACATTGACACTGAGACCCGAAAGCGTGGGGATC  
AAACAGGATTAGATACCCCAGTAGTCC

>Otu2442

CCAGCCTATGGGGCGCACCAAGTGGGGAATATTGGACAATGGGCGCAAGCCTGATCCAGCA  
ATGCCGCGTGTTGTGAAGAAGGCCTGCGGGTTGTAAAGCACTTTCAGTGGGGAGGAAGGGC  
TTGGTGCTAATAACACCGAGCATTGACGCTACCCACAGAAGAAGCACCGGCTAACTCTGT  
GCCAGCAGCCGCGGTAATACAGAGGGTGCAAGCGTTAATCGGAATTACTGGGCGTAAAGG  
GCGCGTAGGTGGTTTGCTAAGTCAGATGTGAAAACCCTGGGCTTAACCTTAGGAATTGCAT  
TTGAAACTGGTAGACTAGAGTTTGGGAGAGGGAAGTGAATTTCCGGTGTAGCGGTGAAA

TGCGTAGATATCGGAAGGAACATCAGTGGCGAAGGCGACTTCCTGGCCCCGATACTGACAC  
TGAGGCGCGAAAGCGTGGGGAGCGAACAGGATTAGAGACCCGAGTAGTCC

>Otu2443

CCAGCCTACGGATGCTGCAGTCGAGAATCTTCCGCAATGGGCGAAAGCCTGACGGAGCGA  
CGTTACGTGAATGAAGAAGCCCTTCGGGGTGTAAGTTCTTTTCTCTGGGAGGAAGTTAT  
TGACAGTACCAGAGGAATAAGGGGATCCTAATTCTGTGCCAGCAGGAGCGGTAAAGACAGA  
ATCCCCAAGCGTTACCCGGATTTATTGGGCGTAAAGGGTCCGTAGGTGGTAAAGTAAGTT  
GAAAGTCAAACTCATCGGCTTAACCTTTGAGATTCTTTCAAACTGCTATACTAGAGGG  
CGTTAGGGGTTAGCGGAACCGACGGGGTAGGGGTGAAATCCGTTGATATCGTCGGGAACA  
CCAAAAGCGAAGGCAGCTAACTAGGACGACCCTGACACTGAGGGACGAAAGCGTGGGGAG  
CAAAAAGGATTAGAAACCCAGTAGTCC

>Otu2444

CCAGCCTATGGGTTGCAGCAGTGGGGAATCTTGCGCAATGGGCGAAAGCCTGACGCAGCA  
ACGCCGCGTGAGGGACGAAGGCTTTCTGAGTTGTAAACCCCTTTTCGACAGGAACGATTGT  
GACGGTACCTGTAGAAGAAGCACCGGCCAACTATGTGCCAGCAGCCGCGGTGATACATAG  
GGTGCAAGCGTTATCCGGATTCACTGGGTTTAAAGGGTGCGTAGGCGGGCAGGTAAAGTCA  
GTGGTGAAATCTCCGGGCTCAACCCGGAACCTGCCGTTGATACTATTTGTCTTGAATGTC  
GTGGAGGTTAGCGGAATATGTCATGTAGCGGTGAAATGCTTAGATATGACATAGAACACC  
AATTGCGAAGGCAGCTAGCTACACGGTTATTGACGCTGAGGCACGAAAGCGTGGGGATCA  
AACAGGATTAGATACCCAGTAGTCC

>Otu2445

CCAGCCTATGGGTGGCTGCAGTCGAGAATCTTTCGCAATGGGCGAAAGCCTGACGAAGCG  
ACGCCGTGTGAGTGATGAAGGCCTTCGGGTGTAAAGCTCTTTCGCTTGGGAAACAAGGGT  
TTGTGGTGAAACAGCCATAGATCTTGAGGGTACCAGGTAAAGAAGCACCGGCTAACTCCGT  
GCCAGCAGCTGCGGTAATACGGAGGGTGCAAGCATTAATCGGATTTATTGGGCGTAAAGG  
GCGCGTAGGCGGGCCCTCAAGTCTGTTGTGAAATTCTGGGGCTCAACCTCGGAGCTGCAA  
CGGAGACTGTGGGTCTGGAGGCTTGGCGGGGAAAATGGAATTCACGTGTAGCGGTGAAA  
TGCGTAGATATGTGGAAGAACACCGGTGGCGAAGGCGATTTTCAGCTTATGCCTGACGC  
TGAAGCGCGAGAGCAAGGGGAGCAAACAGGATTAGATACCCGGGTAGTCC

>Otu2447

CCAGCTACGGGTGGCTGCAGTGGGGAATATTGGACAATGGGCGCAAGCCTGATCCAGCAA  
TGCCGCGTGAAATGATGAAGGCCTTAGGGTTGTAAAGTCCTTTCGGCGGGGACGATGATGA  
CGGTACCCGCGAGAAGAAGCCCCGGCTAACTTCGTGCCAGCAGCCGCGGTAATACGAAGGG  
GGCTAGCGTTGCTCGGAATGACTGGGCGTAAAGGGCGCGTAGGCGGTTTGGACAGTTGGG  
CGTGAAATTCTGGGCTTAACCCGGGGGCTGCGCTCAATACATCCAGGCTTGAGTGAGGA  
AGAGGGTTCGTGGAATTCCCAGTGTAGAGGTGAAATTCGTAGATATTGGGAAGAACACCGG  
TGCGCAAGGCGGCGACCTGGTCCTTTACTGACGCTGAGGCGCGAAAGCGTGGGGAGCAAA  
CAGGATTAGATACCCATGTAGTCC

>Otu2448

CCAGCCTATGGGGGGCTGCAGTCGAGAATCTTCCGCAATGGGCGCAAGCCTGACGGAGCG  
ATGTCGCGTGAAAGGATGAAGGTCTTCGGATTGTAAACTTCTGTCACTGGGGACGAATAAA  
TGACGGTACCCGGAGAGGAAGTCACGGCTAACTACGTGCCAGCAGCCGCGGTAATACGTA  
GGTGGCTAGCGTTGTTTCGGATTTATTGGGCGTAAAGGGTCCGCAGGGGGCCGGCTAAGTC  
TGATGTGAAATACCAAGGCTCAACCTTGGAAGTGCATTGGAACTGGTTGGCTAGAGCAT  
CGGAGAGGAGATTGGAATTCCTGGTGTAGCGGTGGAATGCGTAGATATCAGGAGGAACAC  
CAAAGGCGAAGGCAGATCTCTGGACGATTGCTGACCCTCAGGGACGAAAGCATGGGGATC  
AAACAGGATTAGAAACCCCGTAGTCC

>Otu2449

CCAGCCTACGGGGGGCAGCAGTGAGGAATATTGGGCAATGAGCGAAAGCTTGACCCAGCG  
AGAATTTGTGTGTGAAGAAGGCTTACGTTGTAAAGCACTTTCGGGTAGAACGATAATGAC  
GGTACTATCAGTAAAAGAAGCACTGGCTAAGTCTGTGCCAGCAGCCGCGGTAATACAGAC  
AGTGCAAGCGTTATTCGGATTTAATGGGCGTAAAGGGTATGTTGGTGGCTCAAAAAAAT  
ATATTAAAAAGGCTAGAGTAATAACTTTAGACATAATATAAAGATTAAAGGGCTTGAGTA  
GATAAGGAGTAGGAGGAATTTTTCATGTTAACAGTAAATGTAATGATATGAAAGGGACT  
ACCAGAGGCGAAGGCATCTATCTATTATTTACTGACGCTGAGGTACGAAAGCATGGGGAG  
CAAATCAGATTAGAAACCCCTGTAGTCC

>Otu2452

CCAGCCTATGGGAGGCAGCAGTGGGGAATTTTTGGCAATGGGGGAAACCCTGACCAAGCA



ACGCCGCGTGGGTGATGAAGTCTCTTGGGACGTAAAACCCCTTTCGACGGGGGAAGAAAAGGCGCAAGGCTTTGACGGTACCCGTAGAGAAGCCCCGGCTAACTCCGTGCCAGCAGCCGCGTAATACGGGGGGGGCAAGCGTTGTTTCGGAATTACTGGGCGTAAAGGGCGCGTAGGCGGTCTGCTAAGTTGGATGTGAAAACCTCTGGGCTTAACCCAGAGCCTGCATTCAAACTGACAGGCTAGAGTTCTGGAGGGGATAGCGGAATTCCTGGTGTAGCGGTGAAATGCGTAGATATCAGGAGAACACCGGTGGCGAAGGCGGCTATCTGGACAGAGTCTGACGCTGAGGCGCGAAAGCTAGGGGAGCAAACAGGATTAGATACCCAGTAGTCC

>Otu2453

CCAGCCTACGGGGGGGCTGCAGTAGGGAATATTGCGCAATGGGCGAAAGCCTGACGCAGCGACACCGTGTGAAGGATGAAGATTTTCGGATCGTAAACTTCTGTCAATTGGGGACGAAGGTAGTAGGGTTAATAGCTCTTACTATTGACGGTACCCAATAAGGAAGTCTCGGCTTACTCCGTGCCAGCAGCCGCGGTAAAGACGGGGGAGGCAAGCGTTGTCCGGAATTATTGGGCGTAAAGAGCGCTAGGTGGTTTTGTAAAGTCATTTGTGAAAACCTTTAGGCTTAACTTAAAGACTGCAAGTGATACTGACAACTTGAGTACAGTAGAGGAAAGTGGAATTCCTGGTGTAGCGGTGAAATGCGCAGATATCAGGAAGAACACCAGTGGCGAAGGCGGCTTTCTGGGCTGTTACTGACACTGAGGCGCGAAAGCTAGGGGAGCGAACAGGATTAGATACCCCGTAGTCC

>Otu2456

CCAGCCTATGGGTCGCAGCAGTCAAGAACTTTCACAATGGACGCAAGTCTGATGGAGCGACGCCGCGTGATTGATGAAGTCCTTCGGGACGTAAAGATCTTTTATGAGGGAAGAAGTTTATTGACGGTACCTCATGAATAAGGGGCTCCTAATCTCGTGCCAGCAGGAGCGGTAATACGAGAGCCCCAAGCGTTATCCGGAATTATTGGGCGTAAAGGGTGCGTAGGCGGTTATGTTAGTCGTGTGTTAAAACCCGGGGCTCAACCTCGGATCTGCGCGCGAAACGGCATGACTTAGAATGAAGAAGAGGTGTGCGGAACCTCATGGTGTAGGGGTGAAATCCGTTGATATCATGGGGAACACCAAATGCGAAAGCAGCACACTGGTCTTTTATTGACGCTGAGGCACGAAAGCGTGGGTAGCGAATGGGATTAGATACCCGAGTAGTCC

>Otu2462

CCAGCCTACGGGAGGCAGCAGTGGGGAATATTGGACAATGGGGGCAACCCTGATCCAGCAACGCCGCGTGAATGAAGAAGGTCTTAGGATTGTAAAGTTCTTTTGCCTGAGAGCAAATATCATTAGTTAAAAGCTGATGGTTATGAGAGTATCAGGAGAATAAGCACCCGGCTAACTACGTGCCAGCAGCCGCGGTAATACGTAGGGGTGCGAGCGTTAATCGGAATTACTGGGCGTAAAGAGTGCGTAGGCGGATATGTAAGTTAGATGTGAAATACCTGGGCTTAACCTGGGAGGTGCATTTAAGACTGCATATCTAGAGTTTGTGAGAGGGGGGTAGAATTCCAAGTGTAGCAGTGAAAATGCGTAGAGATTTGGAGGAATACCGATGGCGTAGGCAGCCCCCTGGGATAAGACTGACGTGAGGCACGAAAGCGTGGGTAGCAACAGGATTAGATACCCCTGTAGTCC

>Otu2466

CCAGCCTACGGGTGGCTCCAGTGAGGAATCTTCCGCAATGGACGAAAGTCTGACGGAGCAACGCCGCGTGACAGGATGACGGCCTTCGGGTGTAAACTGCTTTTATTTGGGAAGATTATGACGGTACCAAATGAATAAGGACCGGCTAACTACGTGCCAGCAGCCGCGGTAATACGTAGGTCCAAGCGTTATCCGGAATTACTGGGCGTAAAGCGTGCGTAGGCGGCGCGTTAAGTGAGATGTGAAATCTGGCGGCTCAACCGCGAGACTGCATCTCATACTGGCGTGCTAGAGGATGTCAGAGGCAAGTGGAATTCGTAGTGTAGCAGTGAAATGCGTAGATATTACAAGGAACACCAATGGCGAAGGCAGCTTGCTGGGCCACACCTGACGCTGAGGTACGAAAGCGTGGGGAGCGAACAGGATTAGATACCCGTGTAGTCC

>Otu2469

CCACCTATGGGACGCAGCAGTGGGGAATATTGGACAATGGGGGCAACCCTGATCCAGCGATGCCGCGTGGGTGAAGAAGGCCTTCGGGTGTAAAGCCCTTTAGGTCGGGACGAAGTTATGCGGGGGATAATCCCGTGTAGTTGACGGTACCGACAGAATAAGCACCGGCAAACCTCTGTGCCAGCAGCCGCGGTAATACAGAGGGTGCGAGCGTTAATCGGAGTTACTGGGCGTAAAGGCGCGTAGGCGGTTATGTGGGTGTGATGTGAAAGCCCCGGGCTTAACCTGGGAAGTGCATGCAAACCTATGTAGCTAGAGTATAAGAGAGGGTGGCGGAATTTCCGGTGTAGCGGTGAAATGCGTAGAGATCGGAAGGAACGTCAATGGCGAAGGCAGCCACCTGGCTTAATACTGACGCTGAAGCGCGAAAGCGTGGGGAGCGAACAGGATTAGATACCCAGTAGTCC

>Otu2471

CCAGCCTATGGGACGCTCCAGCCGAGAATATTGACAATGGGCGCAAGCCTGATCGAGCGATACCGCGTGGTGATGAAGCGCTTCGGCGCGTAAACATCTTTTATGGAGGAGGAAGTTATTGACGTTACTCCATGAATAAGGGGCTCCTAACTCTGTGCCAGCAGGAGCGGTAATACAGAGGCCCAAGCGTTACCCGGAATTACTGGGCGTAAAGAGTGCGTAGGTGGTTCGTGTTAGTCGTGCGTCAAAACCCGGAGCTCAACTCCGGATCCGCGCACGAAACGGCACGACTCGAGAG

CGTGAGAGGTCTGTGGAACCTCTGGGTGTAGGGGTGAAATCCGTTGATATCCAGGGGAACA  
CCGAAAGCGAAGGCAGCAGACTGGCGCGTTTCTGACACTCAAGCACGAAAGCGTGGGTAG  
CGAACGGGATTAGAGACCCAGTAGTCC

>Otu2475

CCAGCCTATGGGTGGCAGCAGTGAGGAATATTGGTCAATGGACGCAAGTCTGAACCAGCC  
ATGCCGCGTGAAGGATGAAGGCCTTCTGGGTGTAAACTTCTTTTATCTGGGAAGAAACC  
ACTTTTTTCTAAGAGTGTTGACGGTACCAGAGGAATAAGCACCGGCTAACTCCGTGCCAG  
CAGCCGCGGTAATACGGAGGGTGCAAGCGTTATCCGGATTTACTGGGTTTAAAGGGTGTG  
TAGGCGGGCACTTAAGTCAGTGGTGAAATCTCTAGGCTCAACCTAGAACTGCCATTGAT  
ACTATATGTCTTGAATTCTGTGAGGAGGGCGGAATATGTCATGTAGCGGTGAAATGCAT  
AGATATGACATAGAACACCGATAGCGAAGGCAGCTCTCTAAGCAGACATTGACGCTGAGG  
CACGAAAGCGTGGGGATCAAACAGGATTAGAGACCCGTGTAGTCC

>Otu2479

CCAGCCTATGGGGGGCAGCAGTGGGGAATATTGGACAATGGGCGCAAGCCTGATCCAGCA  
ATGCCGCGTGGGTGAAGAAGGTCTTCGGATTGTAAAGCCCTTTTCGGCGGGGACGATAATG  
ACGGTACCCGTAGAAGAAGCTCCGGCTAACTTCGTGCCAGCAGCCGCGGTAATACGAAGG  
GGGCTAGCGTTGTTCGGAATTACTGGGCGTAAAGCGCGCGCAGGCGGCTTTTCAAGTCGA  
GGGTGAAAGCCCAGAGCTCAACTCTGGAACCTGCCTTCGAAACTGTGGAGCTTGAGTACGG  
GAGAGGTGAGTGGAATTCAGTGTAGAGGTGAAATTCGTAGATATTGGGAAGAACACCG  
GTGGCGAAGGCGGCTCACTGGCCCGTTACTGACGCTCAGGCGCGACAGCGTGGGGATCAA  
ACAGGATTAGATACCCGCGTAGTCC

>Otu2481

CCAGCCTACGGGAGGCTCCAGTAGGGAATATTGGGAATGGGCGCAAGCCTGACCCAGCAA  
CGCCGCGTGAGTGATGAAGGCCTTCGGGTGTAAACTCTTTTCACCGGGAAGAGGAAGG  
ACGGTACCCGTGGAATAAGTCTCGGCTAACTACGTGCCAGCAGCCGCGGTAACACGTAGG  
AGACAAGCGTTATCCGGATTTACTGGGTGTAAAGCGCGTGCAGGCGGTTAGGTAAGTTGG  
ATGTGAAAGCTCCTGGCTTAACTGGGAGAGGTGCTTCAAACTACCGAACTAGAGGATGG  
CAGAGGGGAGTGGAATTCAGAGTGTAGCGGTAAAATGCATAGATATTTCGGAAGAACACCA  
GTGGCGAAGGCGGCTCTCTGGGCCATATCTGACGCTCATACGCGAAAGCTAGGGTAGCAA  
ACGGGATTAGATACCCCTCGTAGTCC

>Otu2489

CCAGCCTATGGGGGGCACCAGTCGAGAATTTTTCTCAATGGGCGAAACCCTGATGCAGCG  
ACGCCGCGTGAGGATGAAGGTCTAGGCCTGTAAACTCCTTTTATGGGGAAAGACTTAG  
GACGGTACCCCATGAATAAGGACCGGCTAACTACGTGCCAGCAGCCGCGGTAAGACGTAG  
GGTCCAAGCGTTGTCCGGATTTACTGGGCGTAAAGAGCGCGTAGGCGGCTCGTTAAGTGT  
GAAGTGAAATCCCTAGGGCTCAACCCAGAACTGCTTTACATACTGGCGAGCTAGAGGGA  
TGCAGAGGTTGGTGGAATTCCTGGTGTAGCGGTGAAATGCGTTGATATCAGGAGGAACAC  
CCATGGCGAAGGCAGCAAACTGGGCATCATCTGACGCTGAGGCGCGAAAGCGTGGGTAGC  
AAACAGGATTAGAAACCCGCGTAGTCC

>Otu2490

CCAGCCTACGGGGTGCTCCAGTGAGGAATATTGGTCAATGGGCGCAAGCCTGAACCAGCC  
ATGCCGCGTGAAGGATGAAGGCCCTATGGGTGTAAACTTCTTTTGTACGGGATGAAACT  
TTCTTACGTGTAAGGAACTGACGGTACTGTACGAATAAGCAACGGCTAACTCCGTGCCAG  
CAGCCGCGGTAATACGGAGGTTGCAAGCGTTATCCGGATTTATTGGGTTTAAAGGGTGC  
TAGGCGGGATTGTAAGTCAGTGGTGAAAACCTGCAGCTTAACTGTAGAAGTCCATTGAT  
ACTGCCATTCTTGAGTATAGTTGAGGTAGGCGGAATGTGTAATGTAGCGGTGAAATGCTT  
AGATATTACACAGAACACCAATTGCGTAGGCAGCTTACTAAACTAAAAGTACGCTGAGG  
CACGAAAGCGTGGGGAGCAAACAGGATTAGAAACCCCCGTAGTCC

>Otu2493

CCAGCCTATGGGATGCTGCAGCAAGGAATCTTCCACAATGGGCGAAAGCCTGATGGAGCA  
ACGCCGCGTGACAGGATGAATGCCTTCGGGTGTAAACTGCTTTTATACGTGACGAATATG  
ACGGTAGCGTATGAATAAGGATCGGCTAACTCCGTGCCAGCAGCCGCGGTCATACGGAGG  
ATCCAAGCGTTATCCGGATTTACTGGGCGTAAAGAGTTGCGTAGGTGGTAGTTTAAAGCGA  
ATAGTGAAATCTTGTGGCTCAACCATGAGACTGTTATTTCGAACTGAGCTACTCGAGAACG  
AGAGAGGTCACTGGAATTCCTGTGTAGGAGTGAAATCCGTAGATATAGGGAGGAACACC  
AATGGCGTAGGCAGGTGACTGGCTCGTTTCTGACACTGAGGCACGAAAGCGCGGGGAGCA  
AACAGGATTAGAAACCCAGTAGTCC

>Otu2495

CCAGCCTACGGGTGCTCCAGTCGAGAATCTTCCGCAATGGGCGAAAGCCTGACGGAGCG  
ACGTTACGTGAATGATGAAGCCCTTAGGGGTGTAAAGTTCTTTTATATGGGAAGAAGTTA  
TTGACTGTACCATATGAATAAGGAGATCCTAATTCTGTGCCAGCAGGAGCGGTAAGACAG  
AATCTCCAAGCGTTACCCGGATTTATTGGGCGTAAAGGGTCCGTAGGTGGCACAGTAAGT  
TGAAAGTTAAATCTCATCGGCTTAACCTTTGAGGTGCTTCAATACTGCTGCGCTTGAGG  
GCGTTAGGGGTAGCGGAACCGACGGAGTAGGGGTGAAATCCGTTGATATCGTCGGAAC  
ACCAAAGCGAAGGCAGCTAACTAAGACAGCCCTGACACTGAGGAACGAAAGCGTGGGA  
GCAAAAAGGATTAGAGACCCCCGTAGTCC

>Otu2496

CCAGCCTACGGGTGTCAGCAGTCGAGAATTTTTCAACAATGGGCGCAAGCCTGATGGAGCG  
ACGCCGCGTGGGGGATGAATGGCTTCGGCCCGTAAACCCCTGTCATTTGCGAACAATGCG  
TTCGACCTAACACGTGCAACGTTGATAGTAGCGAAAGAGGAAGGGACGGCTAACTCTGTG  
CCAGCAGCCGCGGTAATACAGAGGTCCCAAGCGTTGTTTCGGATTCACTGGGCGTAAAGGG  
TGCGTAGGTGGCGAGGCAAGTCGGATGTGAAAGCTCGGAGCTCAACTCCGAAATGGCATT  
GGAAACTGCCTTGCTCGAGGGTTGGAGGGGGGACTGGAATACTTGGTGTAGCAGCGAAAT  
GCGTAGATATCAAGTGGAACACCAGTGGCGAAGGCGAGTCCCTGGACAACCTCTGACACT  
GAGGCACGAAAGCTGGGGGAGCAAACAGGATTAGAAACCCGCGTAGTCC

>Otu2499

CCAGCCTATGGGACGCACCAGTTAAGAATATTCCACAATGCACGAAAGTGTGATGGAGCG  
ACGCCGCGTGAATGATGAAGCCCTTAGGGGTGTAAAGTTCTTTTATTAGGAAAAATTTT  
TGATGTTACTAAATGAATAAGGGGCTGCTAACTTCGTGCCAGCAGCAGCGGTAATACGAA  
GGCCCCGAGCGTTATCCGGATTTACTGGGTGTAAAATGTCTGTAGACGGTTTTATAAGTT  
AAATGTAAAATCTTTTAGCTTAATAAAAGTTTGCATTTAATTCTATAAGACTAGAGGGT  
GGGGGAAGTAAGCGGAATTGGTGGTGTAGTTGTAATAAGCGTTAATATCACCAAGAACAC  
CAAAAGCGTAGGCAGCTTACTAAACATACCTGACGTTGAGAGACGAAAGCGTGGGGAGC  
GAAACAGATTAGATACCCGCGTAGTCC

>Otu2506

CCAGCCTACGGGTGGCTGCAGTGAGGAATATTGCGCAATGGACGGGAGTCTGACGCAGCA  
ACGCCGCGTGAGCGATGAAGGCCCTTCGGGTGCTAAAGCTCTTTTCTGGGGGACGAGGAAG  
GACGGTACCTCAGGAATAAGCCTCGGCTAACTACGTGCCAGCAGCCGCGGTAACACGTAG  
GAGGCAAGCGTTATCCGGATTTATTGGGCGTAAAGCGCATGCAGGTGGTTCCACAAGTCG  
GATGTGAAAGCTCCTGGCTTAAGTGGGAGAGGTCGTTGAAACTGTGGGACTGGAGGTCG  
GAAGAGGGAAGCGGAATTCCCGGTGTAGTGTTGGAATGCGTAGATATCGGGAGGAACACC  
AGTGGCGGAAGCGGCTTCCTGGTCCGCACCTGACACTCAGATGCGAAAGCGTGGGGAGCG  
AACAGGATTAGAAACCCCGGTAGTCC

>Otu2509

CCAGCCTACGGGTGGCAGCAGTGGAGAATATTGCGCAATGGGCGAAAGCCTGACGCAGCA  
ACGCCGCGTGTGTGATGAAGGCCCTTCGGGTGTAAAGCACTTTCGGCCGGAAGAAGGGT  
GTGCGAACTAATAATGCGTACATTTGATGGTACCGGAAGAAGAAGCACCGGCTAACTTCG  
TGCCAGCAGCCGCGGTAATACGAAGGGTGCAGCGTGTTCGGAATTACTGGGCGTAAAG  
GGTTCGTAGGCGGGAGGGTAAGTTAAGTGTGAAATGTCCGGGCTCAACCTGGAACGTGCA  
CTTAAAACTGCTCTTCTTGAGTACTGGAGAGGGCAGTGAATGCTGGTGTAGGAGTGAC  
ATCCGTAGAGATCAGCAGGAACACCGGAGGCGAAGGCGACTGCCTGGCCAAGTACTGACG  
CTGAGGAACGAAAGCGTGGGGAGCAAACAGGATTAGATACCCCTGTAGTCC

>Otu2512

CCAGCCTACGGGAGGCTGCAGTGAGGAATATTGGTCAATGGGCGCAAGCCTGAACCAGCC  
ATGCCGCGTGAAGGATGAAGGCCCTTCGGGTGTAAAGCTCTTTTAAGTGGGAAGAAACC  
CCTTGTATCTACGAGGGTTGACGGTACCATAGGAATAAGCACCGGCTAACTCCGTGCCAG  
CAGCCGCGGTAATACGGAGGGTGCAAGCGTTATCCGGATTTACTGGGTTTAAAGGGTGTG  
TAGGCGGGCCTTTAAGTCAGTGGTGAATCTCTGGGCTTAACCTGGAACCTGCCATTGAT  
ACTATTGGTCTTGAATCTGTGAGGAGGGCGGAATATGTCATGTAGCGGTGAAATGCAT  
AGAGATGACATAGAACCCCGATTGCGAAGGCAGCTCTCTAAACAGCGATTGACGCTGAGG  
CACGAAAGCGTGGGGATCAAAACAGGATTAGAAACCCCGTAGTCC

>Otu2514

CCGCCTACGGGGTGCAGCAGTGGGGAATATTGGACAATGGAGGCAACCCTGATCCAGCAA  
TGCCGCGTGAGTGATGAAGGCCCTTCGGGTGTAAAGCTCTTTCGCCTACGACGATGGTGA  
CGGTAGTAGGAGAAGAAGCCCCGGCTAACTTCGTGCCAGCAGCCGCGGCAATACGAAGGG  
GGCTAGCGTTGTTTCGGAATTACTGGGCGTAAAGGGCGCGTAGGCGGCCGCTCAGTCAGA

TGTGAAAGCCCCGGGGCTCAACCCCGGATGTGCATTTGATACTGGTCTGGCTTGAGGACGGG  
AGAGGATAGTGGAATTTCCAGTGTAGAGGTGAAATTCGTAGATATTGGGAAGAACACCGG  
TGGCGAAGGCGGCTATCTGGACCGTATCTGACGCTGAGGCGCGAAAGCGTGGGGAGCAAA  
CAGGATTAGAAACCCGTGTAGTCC

>Otu2517

CCAGCCTATGGGGTGCAGCAGTCGAGAATCATTCGCAATGGGCGAAAGCCTGACGATGCG  
ACGCCGTGTGAGCGAAGAAGGCCTTCGGGTGTAAAGCTCTTTCGCTTGGAACAAGAGA  
TGTCTGTTTAAATAAACGGCAAATTTGAGGGTACCAGGTAAAGAAGCACCGGCTAACTCCGT  
GCCAGCAGCTGCGGTAATACGGAGGGTGCAAGCATTAAATCGGATTTATTGGGCGTAAAGG  
GCGCGTAGGCTGAGATGTAAGTCAGATGTGAAATCCCTGGGCTCAACCCAGGAACTGCAT  
TTGAAACTACATTTCTAGAGGGTAGGCGGAGAAAATGGAATTCACATGTAGCGGTGAAA  
TGCGTAGATATGTGGAGGAACACCGGTGGCGAAGGCGGTTTTCTAGCTTACTCCTGACGC  
TGAGGCGCGAAAGCAAGGGGATCAAACAGGATTAGAGACCCGTGTAGTCC

>Otu2522

CCAGCCTATGGGTCGCACACAGTCGAGGATCTTTCGCAATGGGCGCAAGCCTGACGAAGCG  
ACACTGCGTGAGTGATGAAGGCCTTCGGGTGTAAACTCTTTCGCGCAAGAACAAGGAA  
GGGATGTGAATAACATTCTGACTTGAGGGTACTGCGTAAAGAAGCACCGGCTAACTCCGT  
GCCAGCAGCTGCGGTAATACGGAGGGTGCAAGCATTAAATCGGAATTATTGGGCGTAAAGG  
GCGCGTAGGCGGAAATGTAAGTCAGATGTGAAATTCGAAGCTCAACTTCGGAGCTGCAT  
TTGAAACTACAATTTCTAGAGGGTTGACGGAGAAAACGGAATTCACGTGTAGCGGTGAAA  
TGCGTAGATATGTGGAAGAACACCGGTGGCGAAGGCGGTTTTCTAGTTAATACCTGACGC  
TGAGGCGCGAGAGCAAGGGGAGCAAACAGGATTAGAAACCCGCGTGTCC

>Otu2523

CCAGCCTACGGGGGGGCTCCAGTGGGGAATTTTTCGCAATGGGCGAAAGCCTGACGCAGCA  
ACGCCGCGTGCGGGACGAAGGCCTTAGGGTCGTAAACCGCTTTCAGCAGGGACGAAACTG  
ACTGTACCTGCAGAAGAAGCTCCGGCTAACTACGTGCCAGCAGCCGCGGTAATACGTAGG  
GAGCAAGCGTTATCCGGATTTATTGGGCGTAAAGCGCGCGTAGGCGGCTTGTTAAGTCAG  
GTGTGAAAGCCGGGGGGCTCAACCCGCGGATTGCATCTGAAACTGGCAGGCTTGAGTGTGG  
TAGAGGAAAGTGGAATTTCCCGGTGTAGCGGTGAAATGCGCAGATATCGGGAGGAACACCA  
GTGGCGAAGGCGGCTTTCTGGGCCACCACTGACGCTGAGGCGCGAAAGCTAGGGGAGCGA  
ACAGGATTAGATACCCTAGTAGTCC

>Otu2525

CCAGCTTACGGGACGCAGCAGTGAGGAATATTGGACAGTGGACGAAAGTTTGATCCAGCC  
ATGGGGCATTGGGGAAAGGAAGGTTCAATGAGACTGTAAACCTTTTGTGAGCCACGATT  
ATGACGGTAGCTGAAGAAAAAAGTCCCGCTAATCTCGTGCCAGCAGCCGCGGTAATACG  
AGAGGGACAAGTGTTATTCCCCTAACTGGGCGTAAAGGGCTTCTAGGCGGTTCTTGAG  
TTAAAGGTGAAAGCCAGTCATATCTTTGGAAGGGCTTTAAACGAAGAACTTCGGGTT  
TTTTTAGAGAATGCACTATGTTGGAAGTAAAGGTTAAATTTGTTGATATCCAACGGGGTT  
CCGAAGGCGAAAGCAGCATTCTAACTAAACCGACGCTGAAGAGCAAAAGCATGGGGATC  
GATGCGGATTAGAGACCCTTGTAGTCC

>Otu2526

CCAGCCTACGGGAGGCTGCAGTGGGGAATTTGTTTCGCAATGGGCGCAAGCCTGACGACGCA  
ACGCCGCGTGAGGATGAAGAATTTTCGGTTCGTAAACTCCTTTTCGACCGAGATGAAAACC  
TCCCGACTTAATACGTTGGGAGGCTGACAGTATCGAGGGAAGCAGCCCCGGCTAACTCCG  
TGCCAGCAGCCGCGGTAATACGGGGGGGGCAAGCGTTGTTTCGGAATTACTGGGCGTAAAG  
GGTTTGTAGGTGGTTCGACTCAGTCAGACGTGAAATCCCTCAGCTTAACTGGGGAACCTACG  
TCTGATACTGGTTGGCTTGAGTGCAGGAGAGGAACGCGGAATTCAGGTGTAGCGGTGAA  
ATGCGTAGATATCTGGAGGAACACCGGTGGCGAAGGCGGCGTTCTGGATTGCAACTGACA  
CTGAGAAACGAAAGCCAGGGGAGCAAACGGGATTAGATACCCGCGTAGTCC

>Otu2531

CCAGCCTATGGGTCGCACACAGTTAGGCATAATCTACAATGTACGCAAGTATGATAGTTTG  
AGCCAGAGTGCTTTCCAATTGGAAAGCTTTTGCTAAATCTAAATAGTTTGGCGAATAAGG  
ACTGGGTAAGACGGGTGCCAGCCGCCGCGGTAATACCCGCGGTCCAAGTCGCAGCCATCA  
TTATTGGGTCTAAAACATCCGTAGCTCGTTTGGTAAGTTCCCTTGTAAGTCCCGGCATCTC  
AAGTGTCGGGCGCGCAGGGAGTACTGCCAGGCTAGAGACTGGAAGACGTGAGAAGTACGT  
TCTAAGTAGTGGTTAAATACGTTAATCTAGGACGGACTCACAATAGCGAAGGCATCTCAC  
GAGGACAGTTCTGACAGTAAGGGATGAAGGCTAGGGGCGCAAAACGGATTAGAAACCCCG  
GTAGTCC

>Otu2533

CCAGCCTACGGGGTGCTCCAGTAAGGAATATTGGTCAATGGACGCAAGTCTGAACCAGCC  
ATGCCGCGTGCGAGGTTATTGAAGGTACCATAAGAATAAGCACCGGCTAACTCCGTGCCAG  
CAGCCGCGGTAATACGGAGGGTGCAAGCGTTATCCGGATTTACTGGGTTTAAAGGGTGCG  
TAGGCGGCTCTTTAAGTCAGTGGTGAAATCCTAGTGCTCAACACTAGAACTGCCATTGAA  
ACTGAGGAGCTCGAGTCAAGGAGAGGTAAGCAGAATTTATGGTGTAGCAGTGAAATGCTT  
AGATACCATAAGGAATACCAATAGCGAAGGCAGCTTACTGGCCTTGTAAGTACGCTGAGG  
CACGAAAGCGTGGGGAGCAAACAGGATTAGATACCCGCGTAGTCC

>Otu2534

CCAGCCTATGGGAGGCAGCAGTCGAGAATCTTTGGCAATGCACGAAAGTGTGACCAAGCG  
ACGCCGCGTGATTGACGAAGCCCTTCGGGGTGTAAGATCTTTTATGCATGAAAAAATTA  
TTGATATCAGTGCATGAATAAGGGGCTCCTAACTCTGTGCCAGCAGGAGCGGTAATACAG  
AGGCCCCGAGCGTTATTCGGAATTATTGGGCGTAAAGGGTGCGTAGGTGGTTTGATTAGT  
CGACGGTCAAAGATCAGGGCTGAACCCTGGGAAGGCCATCGAAACGGTCAGACTCGAGTA  
GGTGAGAGGTGAATGGAATCATGGAGGAGGGGTGAAATCCGTTGATATCATGGGGAAACA  
CCAAATGCGAAGGCAATTCAGTGGCGCCTTACTGACACTCAAGCACGAAAGCGTAGGTAG  
CGAATGGGATTAGAAACCCCTGTAGTCC

>Otu2538

CCAGCCTATGGGATGCACCAGTGGGGAATCTTGCACAATGGGCGAAAGCCTGATGCAGCG  
ACGCCGCGTGAGCGATGAAGGCCCTTCGGGTGTAAAGCTCTGTGGGGAGGGACGAATAAG  
TGCTGGCTAATATCCAGCATGATGACGGTACCTCCTTAGCAAGCACCGGCTAACTCTGTG  
CCAGCAGCCGCGGTAAGACAGAGGGTGCAAACGTTGTTTCGGAATCACTGGGCGTAAAGCG  
CGTGTAGGCGGCTACGTAAGTCGGACGTGAAAGCCACGGCTCAACTGTGGAAGTGCCT  
CGAAACTGTGTAGCTTGAGTCTTGAGAGAGGAAGGCGGAATACTTGGTGTAGAGGTGAAAT  
GCGTAGATATCAAGTGGAACACCAGTGGCGAAGGCGAGTCCCTGGACAACCTCTGACACT  
GAGGCACGAAAGCTAGGGGAGCAAACAGGATTAGAAACCCCGTAGTCC

>Otu2544

CCAGCCTATGGGTCGCTGCAGTGGGGAATATTGGACAATGGGCGCAAGCCTGATCCAGCA  
ATGCCGCGTGTTGAAGAAGGCCCTTCGGGTGTAAAGCACTTTTATCAGGAGCGAAATAC  
CATCGGCTAATACCCGGTGGGGCTGACGGTACCTGAGGAATAAGCACCGGCTAACTTCGT  
GCCAGCAGCCGCGGTAATACGGGGGGTGCAAGCCTTAATCGGAATTACTGGGCGTAAAGC  
GTGCGCAGGCGGTTATGTAAGACAGATGTGAAATCCCCGGGCTTAACCTGGGAACTGCAT  
TTGTGACTGGCGGGCTAGAGTATGGCAGAGGGGGGTAGAATTCCACGTGTAGCAGTGAAA  
TGCGTAGAGATGTGGAGGAATACCGATGGCGAAGGCAGCCCCCTGGGCCAATACTGACGC  
TCATGCACGAAAGCGTGGGGAGCAAACAGGATTAGAGACCCCGTAGTCC

>Otu2546

CCAGCCTACGGGGTGCTCCAGTAAGGAATATTGGTCAATGGAGGCAACTCTGAACCAGCC  
ATGCCGCGTGCGAGGAAGACGGACCTATGGTTTGTAAACTGCTTTTGTACGAGAGAAAACC  
CTACTACGTGTAGTAGGCTGATAGTATCGTAAGAATAAGGATCGGCTAACTTCGTGCCAG  
CAGCCGCGGTAATACGAAGGATCCAAGCGTTATCCGGATTCATTGGGTTTAAAGGGAGCG  
TAGGCGGTTTAATAAGTCAGTGGTGAAATCCCTCAGCTCAACTGAGGACCTGCCATTGAT  
ACTGTGCAACTAGAGTACAGATGACGTTGGCGGAATGTGTCATGTAGCGGTGAAATGCAT  
AGATATGACACAGAACACCGATTGCGAAGGCAGCTGACGAAACTGAAACTGACGCTGAGG  
CTCGAAAGTGCGGGGATCAAACAGGATTAGAGACCCCGTAGTCC

>Otu2549

CCAGCCTACGGGGGGCTGCAGTCGAGAATTTTTCTCAATGGGCGAAAGCCTGAAGGAGCG  
ACGCCGCGTGAGAGGATGAAGGTCTTCGGATTGTAAACTCCTGTCATGAGAGAACAATTCT  
ACAGGTAATAACTGACCTGTAGTTGATAGTATCTCAAGAGGAAGAGACGGCTAACTCTGT  
GCCAGCAGCCGCGGTAATACAGAGGTCTCAAGCGTTGTTTCGGATTCATTGGGCGTAAAGG  
GTGCGTAGGCGGCGCCGTAAGTCAGGTGTGAAATCTCGGGGCTTAACCTCGAAACTGCAC  
TTGATACTGCGGTGCTTGAGGACTGGAGAGGAGATCGGAATTCATGGTGTAGCAGTGAAA  
TGCGTAGATATCATGAGGAAGACAGTGGCGAAGGCGGATCTCTGGACAGTTCCTGACGC  
TGAGGCACGAAGGCCAGGGGAGCAAACGGGATTAGAGACCCCTGTAGTCCC

>Otu2551

CCAGCCTATGGGTTGCACCAGTTAAGAATCTTGCACAATGGGCGAAAGCCTGATGCAGCG  
ACGCCGCGTGAGATGATGAAGGCCCTTCGGGTGTAAATCCGGTAAGCAGGGAAGAATAAG  
TGAGATATAACACGTCTCATGATGACGGTACCTGTCTAAAGCCTCGGCTAACTACGTGCC

AGCAGCCGCGGTAACACGTATGAGGCGAGCGTTGTTCCGGAATTATTGGGCGTAAAGCGCG  
TG TAGGCGGGAAATTAAGTTATGTGTGAAATCCAAGGGCCTAACCTTGAACCTGCACCTA  
ATACTGATTTTCTTGAGTTCGGGAGAGGAGAGCGGAATTCCTGGTGTAGCGGTGAAATGC  
GTAGATATCGGGAAGAACACCAGTGGCGAAGGCGGCTCTCTGGCCTAGAACTGACGCTGA  
GACGCGAAAGCGTGGGGAGCGAACGGGATTAGAAACCCGTGTAGTCC

>Otu2553

CCAGCCTATGGGGGGCACCAGTCGAGGATCTTTTCGCAATGGGCGCAAGCCTGACGAAGCG  
ACGCTGTGTGGACGATGAAGGCCTTCGGGTGTAAAGTCCTTTTCGCGCAAGAACAAGAGA  
GGTTCACTAATAGTGAGCCGATTTGAGGGTACTGCGTAAAGAAGCACCGGCTAACTCCGT  
GCCAGCAGCTGCGGTAATACGGAGGGTGCAAGCATTAAATCGGATTTACTGGGCGTAAAGG  
GCGCGTAGGCGGGTTTTAAAAGTCAAATGTGAAATTCGGGGCTCAACCTCGGAGCGGCAT  
TTGAGACTATAAGTCTATAGAGGGATGGCGGAGAAAGCGGAATTCACGTGTAGCGGTGA  
AATGCGTAGATATGTGGAAGAACACCAGTGGCGAAAGCGGCTTTCTAGTTATTTCTGAC  
GCTGAGGCGCGAGAGCATGGGGAGCAAACAGGATTAGAAACCCTCGTAGTCC

>Otu2557

CCAGCCTATGGGTTGCAGCAGTCGAGAATTTTTTACAATGGGCGCAAGCCTGATGGAGCG  
ACGCCGCGTGGGGGATGAATGGCTTCGGCCCGTAAACCCCTGTCATTTCGCGATCAACCCT  
TGCTATTTTAAAAGATGGCAAGCTGATAGTAGCGGAAGAGGAAGGGACGGCTAACTCTGTG  
CCAGCAGCCGCGCAATACAGAGGTCCCAAGCGTTGTTTCGATTCACTGGGCGTAAAGGG  
TGCGCAGGTGGTGGGGTAAGTCGGATGTGAAATCTCGGAGCTTAACCTCCGAAATGGCATT  
GGAACTGCCCTGCTTGAGGGTCGGAGGGGGGACTGGAATTCCTGGTGTAGCAGTGAAAT  
GCGTAGATATCGAGAGGAACACCAGTGGCGAAGGCGAGTCCCTGGACGACTCCTGACACT  
GAGGCACGAAAGCTAGGGGAGCAAACAGGATTAGAGACCCTAGTAGTCC

>Otu2561

CCAGCCTACGGGAGGCAGCAGTGAGGAATATTGGTCAATGGGGGCAACCCTGAACCAGCC  
ATGCCGCGTGAAGGAAGACGGCCCTAAGGGTGTAAACTTCTTTTGTACTAGGGTAATTT  
CATCTACGAGTAGGTGATTGAAAGTACAGTACGAATAAGCATCGGCTAACTCCGTGCCAG  
CAGCCGCGGTAATACGGAGGATGCAAGCGTTATCCGGATTTATTGGGTTTTAAAGGGTGCG  
TAGGCGGGTAATTAAGTCAGTGGTGAAAGACTGTTGCTTAACGATAGCATTGCCATTGAT  
ACTGAATATCTTGAGTATAGGTGAGGTAGGCGGAATGTGTAGTGTAGCGGTGAAATGCTT  
AGATATTACACAGAACACCGATTGCGAAGGCAGCTTACTAATCTAGTACTGACGCTGAGG  
CACGAAAGCGTGGGGAGCAAACAGGATTAGATACCCTTGTAGTCC

>Otu2563

CCAGCCTATGGGTTGCAGCAGTAGGGAATTTTCCACAATGGGCGAAAGCCTGATGGAGCA  
ACGCCGCGTGCAGGACGAAGGCCTTCGGGTGTAAACTGCTTTTATCTGTGACGAATATG  
ACGGTAGCAGATGAATAAGGATCGGCTAACTCCGTGCCAGCAGCCGCGGTCATACGGAGG  
ATCCAAGCGTTATCCGGAATTACTGGGCGTAAAGAGTTGCGTAGGTGGCATTGTAAGTCA  
GTAGTGAAAGCGTTTCGGCTCAACCGAATATCCATTACTGAACTGCAGAGCTAGAGGATG  
AGAGAGGTTATTGGAATTCCTAGTGTAGGAGTGAAATCCGTAGATATTAGGAGGAACACC  
GATGGCGTAGGCAGATAACTGGCTCATTCCTGACACTAAGGCACGAAAGCATGGGTAGCA  
AACGGGATTAGAAACCCCGTAGTCC

>Otu2567

CCAGCCTACGGGGTGCTGCAGCAGGGAATCGTACGCAATGGACGAAGGTCTGACGTCGCA  
ATGCCGCGTGGAGGATGAAGGCCTTCGGGTGTAAACTCCTTTTATAGCAATAGAGATGT  
TATTAAGAATAAGCACCTGCTAACTCTGTGCCAGCAGCCGCGGTAATACAGAGGGTGCAA  
GCGTTATCCGGATTTATTGGGCGTAAAGCGTTTCGTAGGCGGTTTCGAGAAGTTACTTTTC  
AAAGGCCACGGCTTAACCGGGGAAAGGGAGGTAATACTAGCGAACTTGATTTTTGGTGGG  
GTTTCTAGAACTGATGGTGTAGTAGTGAAATACGTTGATATCATCAGGAATTCGAAGGGC  
GAAGGCAGGAACTAACCAAGTAATGACGCTGAGGAACGACAGCTAGGGGAGCGAAAGGG  
ATTAGAGACCCTAGTAGTCC

>Otu2568

CCAGCCTACGGGGCGCAGCAGTGGGGAATATTGGACAATGGGGGCAACCCTGATCCAGCC  
ATGCCGCGTGAATGATGAAGGCCTTCGGGTGTAAAGTTCTTTTGGTGGGGACGATGATG  
ACGGCACCCACAGAATAAGCTCCGGCTAACTTCGTGCCAGCAGCCGCGGTAATACGAAGG  
GAGCTAGCGTTGTTTCGGAATTACTGGGCGTAAAGGGCGCGTAGGCGGTTTGACAAGTCGG  
ATGTGAAAGCCCTGGGCTTAACCGGGGAATTGCATTTCGATACTGTTTTACTCGAATTCGG  
TAGAGGTTGGTAGAATTCACAGTGTAGAGGTGAAATTCGTAGAGATTGGGAAGAATACCC  
GTGGCGAAGGCGGCCAACTGGACCGACATTGACGCTGAGGCGCGAAAGCGTGGGTAGCAA

ACAGGATTAGATACCCCAGTAGTCC

>Otu2569

CCAGCCTATGGGGGGCAGCAGTGAGGAATCTTGGGCAATGAAGGAACTTTGACCCAGCG  
AGAATTCGTGCATGACGAATGCGGTTGGTTTTCTGTAAAGTGCTTTTCGGCGATGAGGAT  
AATGACTGTAATCGTAAATAAGAAGCACCGGCTAACTCCGTGCCAGCAGCTGCGGTAAAG  
CGGAGGGTGTGGGCCTTATTATTATGATTGGGTGTAAAGGGTATGTAGGTAGCTGCTGC  
TCTTTTTGACTAAAATGATGGAGAGTTCCCTACATCAATTGTCTTTTGAAGGTATACAGCT  
GGAGTTATGTGAGAGGTAGCGGCAAACCCGCATGTAAGGGTAATATTTTGCTATATGGTG  
GGCGAACATCAATAAGCGAAGGCGCTTTCCATCTTTAACTGACGCTCAGATACGGAAGC  
TACGGGAGCAAACAGGATTAGAGACCCGTGTAGTCC

>Otu2570

CCAGCCTACGGGGGGCACCAGGCGCGAAAACCTCCACAATGCACGAAAGTGTGATGGGGGG  
ATCCTACGTGCTCATGTCTGACATGGGCTTTTGCCAAGGCTAGAGATCTTGGCGAATAAG  
GGGTGGGCAAGACCGGTGCCAGCCGCCGCGGTAACACCGGCGCCCCGAGTGGCAATCGCG  
ATTATTGGGCCTAAAGCGTCCGTAGCCGGACAGGTAAATCCTCTGTGAAATCGTTGCGCT  
TAACGTAACGGCGCGCAGGGGACACTGCCTGTCTCGAGACCGGGAGGAGTCAGAGGTATG  
CCGTGGGGACTGGTAAAATGGTATAATCCACGGTAGACCACCAATGGCGAAGGCATTTGA  
CCAGAACGGATCTGACGGTGAGGGACGAAAGCCAGGGGAGCGAACC GGATTAGATACCCC  
TGTAGTCC

>Otu2572

CCAGCCTACGGGGGGCAGCAGTGAGGAATATTGGTCAATGGACGCAAGTCTGAACCAGCC  
ATGCCGCGTGAGGATGAAGGCCCTTACAGGTTGTAACTGCTTTTATACGGGACGAAACC  
CCTGAACGTGTTACGGGCTGACGGTACTGTATGAATAAGCATCGGCTAACTCCGTGCCAG  
CAGCCGCGGTAATACGGAGGATGCAAGCGTTATCCGGATTTATTAGGTTTAAAGGGTGCG  
TAGGCGGAATATTAAGTCAGTGGTGAAATCCTACAGCTTAACTGTAGAGCTGCCATTGAA  
ACTGATATTCTTGAGTCTAGTTGAGGTGGGCGGAATGTGTCATGTAGCGGTGAAATGCAT  
AGATATGACACAGAACACCGATTGCGTAGGCAGCTCACTAAGCTATAACTGACGCTGAGG  
CACGAAAGCGTGGGGATCAAACAGGATTAGAGACCCCTCGTAGTCC

>Otu2575

CCAGCCTACGGGTGGCTGCAGTTTTCGAATCATTCCACAACGGGCGAAAGCCTGATGGTGCG  
ACGCCGCGTGAGGGATGAAGGTCTTCGGATTGTAAACCTCTGTCACTGGGGAGAAAGCGC  
TTTGAGTTAATAGTTCAAAGCCTGATTTAACC CGGAGAGGAAGCAGTGGCTAACTCTGTG  
CCAGCAGCCGCGGTAATACAGAGACTGCAAGCGTTATTTCGGATTCACTGGGCGTAAAGGG  
TGCGCAGGCGGCCATGTGTGTCAGATGTGAAATCCCGGGGCTCAACCCAGAACTGCGTC  
TGAAACTACATGGCTAGAGTATTGGAGAGGGTAGTGGAATTCACGGTGTAGCAGTGAAAT  
GCGTAGATATCGTGAGGAACACCAGAGGCGAAGGCGACTACCTGGACAATTACTGACGCT  
CAGGCACGAAAGCGTGGGGAGCCAAAGGGATTAGAAACCCGCGTAGTCC

>Otu2576

CAGTCTACGGGTGACACCAGTGGGGAATTTTGGACAATGGGGGCAACCCTGATCCAGCCA  
TTCCGCGTGAGTGAAGAAGGCCTTCGGGTGTAAAGCTCTTTCGGCAGGAACGAAACGGC  
GCGGGCGAATACCCTGCGTTAATGACGGTACCTGAAGAAGAAGCACCGGCTAACTACGTG  
CCAGCAGCCGCGGTAATACGTAGGGTGCGAGCGTTAATCGGAATTACTGGGCGTAAAGCG  
TGCGCAGGCGGTTTTGTAAAGACAGCTGTGAAATCCCGGGGCTTAACCTGGGAACCTGCGGT  
TGTGACTGCAAGACTGGAGTAAGGCAGAGGGGGGTGGAATTCCACGTGTAGCAGTGAAAT  
GCGTAGAGATGTGGAGGAACACCGATGGCGAAGGCAGCCCCCTGGGCTATTACTGACGCT  
CATGCACGAAAGCGTGGGGAGCAAACAGGATTAGATACCCCTTGTAGTCC

>Otu2577

CCAGCCTACGGGTGCGCAGCAGTCGAGAATTTTTCACAATGGGGGCAACCCTGATGGAGCG  
ACGCCGCGTGAGGATGAAGGGCTTCGGCTCGTAACTCCTGTCACCCAGACAAAGCCC  
CTCCGGTGAACATCCGGAGGGTTTGATGGTATGGGGAGGGGAAGGGACGGCTAACTCTGT  
GCCAGCAGCCGCGGTAATACAGAGGTCCCAAGCGTTGTTTCGGATTTACTGGGCGTAAAGG  
GTGCGTAGGAGGCTTGGAAGTCAAGTGTGAAATCTCACC GCTTAACGGTGAATGGCGC  
TTGATACTCCCGAGCTAGAAGATCGGAGGGGAGAACGGAATTCCTGGTGTAGCGGTGAAA  
TGCGTAGATATCAGGAGGAACACCAACGGCGAAGGCAGTTCTCTGGACGATTCTTGACTC  
TGAGGCACGAAGGCCAGGGGAGCAAACGGGATTAGAAACCCCTTGTAGTCC

>Otu2579

CCAGCCTATGGGTCGCTCCAGTAGGGAATATTGCTCAATGGGGGAAACCCTGAAGCAGCA  
ACGCCGCGTGAGTGATGAAGGCCCTTCGGGTGTAAAGCTCTGTTGTACGGGGAGAATGAG

GGTGTGTGTAATATGCTCACCAAGTGACAGTACCGTATAAGAAAGGACCGGCTAACTTCG  
TGCCAGCGGCCGCGGTAAGACGGGGGGTCTAGCGTTGTTTCGGAATCATTGGGCGTAAAG  
CGTGTGCAGGTGGTTTTGGAAAGTTGGATGTGAAAGCCTTGGGCTTAACCCAAGAAGTGCA  
TTCAAAACTACCAAACCTTGAGTAAGGAAGAGGGTTCGTGGAATTCCAGGTGTAGTGGTGAA  
ATACGTAGATATCTGGAGGAACACCGGTGGCGAAGGCGGCGACCTGGTCCTATACTGACA  
CTCATACACGAAAGCGTGGGGATCAAACAGGATTAGAGACCCTCGTAGTCC

>Otu2589

CCAGCCTATGGGATGCTCCAGACTGGACGAACTCGAATACGAAGCCGTCGGGATCATTCA  
TCATCACGGCACGGGTATTATTCCGGGGCCGCTGCGTATACACGGGTCCGGCGCTTGTGG  
TTGGCACTTCGATACCCCGGTCTTTGACCTTATCGAATGCCTTGTTCGATGTCCCGTACCT  
GAATCGAAAGGCGGGTTATACCGGGGTTCGTAAATATGCTGCCTGAATGGCTTCCGTTTCA  
TCCCTGAGAACTCAATGAGCACAAGCTGGAAATTAGACCCGGGAATGGACATCGTGGCAG  
ACCTTGCTCTGGCAGCCGGATTTCGTGCCACAGCCTTCTGCACGAGTGTGGAGTTGGCAG  
GAGCCAGTGGTGCGGGCGGGGAAACCACTTGCAGATCGAGACCCTCATGATAGAACTCGA  
TGGATTCCCTCGAGATTTGGGACGACATGAATTAGAGACCCTTGTAGTCC

>Otu2590

CAGCCTATGGGGCGCTGCAGTCGAGAATAATGGTCAATGCGCGAAAGCGTGAACCTGCGA  
TCTACCAGCGGTGATGAAGGAGTTTTCTGTAAAGCCGATAAGGAGAGACCCAGAAGGAGG  
GTCTTTCTGCTTAGTCGTGATAAATCCTTGTGCCAGCAGTCGCGGTATACAAGAGCGGC  
AAGTGTTCGATGGAATTCGGTGTAAAGGGTAGGTAGGCGGCAGTGTCTATTCTGCGAT  
GTCTGTGTCAAGCGATTGACAAAGGCAACGATGTGGATGTGGATAGTGGATGGAATTTAT  
AAGACAAGACGATCTCTTTGAAGGGATTCTGTCAAGCTGCTTGAGAATACGAGAGGGAA  
ATGGAATGACGAGAGTACCAATGAAATAGGTCGATCCTCGTTGGAACACCAATGGCGAAG  
GCAATTTCTCGAGTTTATCTGACGCTGAGCTACGAAAGCGTGGGGAGCAAACGAGATTA  
GATACCCAGTAGTCC

>Otu2594

CCAGCCTATGGGAGGCTGCAGCCGAGAATATTCGCAATGGGCGAAAGCCTGACGGAGCG  
ACGCCGCGTGGTTGATGAAGTCCTTCGGGACGTAAAAACCTTTTATGGGGGAGGAAGTAA  
TTGACGTTACCTCATGAATAAGGGGCTCCTAACTCTGTGCCAGCAGGAGCGGTAATACAG  
AGGCCCCGAGCATTATCCGGAATCACTGGGCGTAAAGGGTGTGTAGGCGGTTCGCGTTAGT  
CTTTTGTTAAAGTTCTTCGGCTTAACCGAGGAAATGCAGAGGAAACGGCGCGACTTCGAG  
GACGCGAGAGGTAGAGGGAACTCATGGTGTAGGGGTGAAATCCGTTGATATCATGGGGAA  
CACCAAATGCGAAGGCACCTCTACTGGCGCGCTCCTGACGCTGAAACACGAAAGCGTGGGT  
AGCGAATGGGATTAGAAACCCAGTAGTCC

>Otu2599

CCAGCCTACGGGACGCTCCAGTTGGGAATTTTGCACAATGGACGAAAGTCTGATGCAGCA  
ACGCCGCGTGGGGGATGAAGATTTTCGGATTGTAAACCCCTTTTATCAGGGAGTAATTTT  
TGAACGTACCTGATGAATAAGCACC GGCTAACTCCGTGCCAGCAGCCGCGGTAATACGGA  
GGGTGCAAACGTTGTCGGATTTACTGGGCGTAAAGCGTATGTAGGTGGCCTTATAAGTGA  
ATGATTAAAGACCAACGCTTAACGTTGGAACGTGTTGTTTCATACTGTTTGGCTGGAGGGTG  
GCAGGGGAGCATGGAACCTTTGAGTGTAGGAGTGATATCCGTAGATATTCAAAGGAACACC  
AATGGCGAAGGCAGTGCTCTGGGCCATTTCTGACACTGAGATGCGAAAGTGTGGGGAGCA  
AACGGGATTAGATACCCTCGTAGTCC

>Otu2602

CCAGCCTATGGGTTGCTGCAGCAGGGAATCGTACGCAATGGACGAAAGTCTGACGTCGCA  
ATGCCGCGTGGAGGATGAAGGCCTTCGGGTGTAAACTCCTTTTATAGTAATAGAGATGT  
TATTAAGAATAAGCACCCGCTAACTCTGTGCCAGCAGCCGCGGTAATACAGAGGGTGCAA  
GCGTTATCCGGATTTATTGGGCGTAAAGCGTTTCGTAGGTGACCAAGTAAGTTATCTTTC  
AAAGACCACGGCTTAACCGGGGGAAGGGAGGTAATACTGCTAGGTTGATTTTTTGGTGGG  
GCTTCTGGAACGTGATGGTGTAGTAGTGAAATACGTTGATATCATCAGGAACCTCCGAGGGC  
GAAGGCAGGAAGCTAACCAATTAATGACACTGATGAACGACAGCTAGGGGAGCGAAAGGG  
ATTAGATACCCCTGTAGTCC

>Otu2606

CCAGCCTATGGGTCGCACCAGTAAGGAATATTGGTCAATGGGCGGAAGCCTGAACCAGCC  
ATGCCGCGTGCAGGAAGACGGCCCTATGGGTTGTAAACTGCTTTTGCAGGGGAATAAACC  
CCGGTACGAGTACCGGGCTGAATGTACTCTGAGAATAAGGATCGGCTAACTCCGTGCCAG  
CAGCCGCGGTAATACGGAGGATGCGAGCGTTATCCGGATTTATTGGGTTTAAAGGGTGC  
TAGGCGGATTAATAAGTCAGTGGTGAAAACCTTCAGCTTAACTGGAGACTTGCCATTGAT



ACTGTTAGTCTTGAGTACGGTCAAGGTAGGCGGAATGTGTAATGTAGCGGTGAAATGCTT  
AGATATTACACAGAACACCGATTGCGAAGGCAGCTTACTGGGCCATTACTGACGCTGATG  
CACGAAAGCGTGGGGAGCGAACAGGATTAGAAACCCGCGTAGTCC

>Otu2607

CCAGCCTACGGGGCGCAGCAGTGGGGAATATTGCACAATGGGCGCAAGCTTGATGCAGCG  
ACGCCGCGTGAGGAAGAAGGTCTTTGGATTGTAACTCCTGTAAAGTGGGAAAAAGAA  
GCTTATTTAAAGATGAGTTGGATGATGGTACCCTAGAGAAAGCACCGGCAAACCTTCGT  
GCCAGCAGCCGCGGTAATACGAAGGGTGTAAAGCGTTATTCGGAATAACTGGGCGTAAAGA  
GCGCATAGGCGGGCTATTAAGTTATTCGTTAAATCTCCTGGCTTAACTGGGAAAGGGCGG  
GTGAACTGGTAGTCTAGAGTGTAAAGAGAGAGAAGTGGAAATTCGAGTAGCGGTGAAA  
TGCGTAGATCTCGAGAGGAACACCGGAGGCGAAGGCGGCTTCTTGGCTTACAACCTGACGC  
TCAAGCGCGAAAGCGTGGGGAGCAAACAGGATTAGAGACCCTTGTAGTCC

>Otu2609

CAGCCTACGGGGGCGCAGTGGGGAATCTTGCACAATGGACGAAAGTCTGATGCAGCAAC  
GCCGCGTGGGGGATGAAGCTTTTCGAGTGTAAACCCCTTTCGACCCGGAAGAAAGCCCCG  
CAAGGGTTTGACGGTACGGGTATAAGAAGCCCCGGCTAACTACGTGCCAGCAGCCGCGGT  
AAAACGTAGGGGGCCAGCGTTGCTCGGAATTACTGGGCGTAAAGGGTCCGTAGGCGGTGT  
GGCAAGTCGGTAGTGAAATCTCTGGGCTTAACCCAGAGGCTGCTGCCGAACTGCTATGC  
TAGAGTGTGAGAGAGGCGAGTGAATTACGGGTGTAGCGGTGAAATGCGTAGATATCCGT  
AGGAACATCAGTGGCGAAGGCGACTACCTGGTCTGGCATTGACGCTCATGTGCGAAAGCG  
TGGGGAGCAAACAGGATTAGAAACCCCGTAGTCC

>Otu2610

CCAGCCTACGGGTGGCAGCAGTGGGGAATATTGCGCAATGGGCGGAAGCCTGACGCAGCG  
ACGCCGCGTGGGGGATGAAGGCCTTCGGGTGTAAACCCCTTTCACCAGGAGCGAAAAACA  
GACGGTACCTGGGGAAGAAGCGCCGGCTAACTACGTGCCAGCAGCCGCGGTGATACGTAG  
GGCGCAAGCGTTGTCCGGAATTATTGGGCGTGAAGAGCTCGTAGGCGGCCGTGTCGCGTCC  
GCTGTGAAATCCTGGGGCTTAACCCCGGGCGTGCAGTGGATACGGGCTGGCTAGAGGCAG  
GCAGGGGAGAACGGAATTCCCGGTGTAGCGGTGAAATGCGCAGATATCGGGAGGAACACC  
GGTGGCGAAGGCGGTTCTCTGGGCCTGTTCTGACGCTGAGGAGCGAAAGCGTGGGGAGCA  
AACAGGATTAGAGACCCTGGTAGTCC

>Otu2614

CCAGCCTACGGGGGGCAGCAGTCAAGGATCTTCGGCAATGGGCGCAAGCCTGACCGAGCG  
ACGCCGCGTGCGGGATGAAGGCCTTCGGGTGTAAACCGCTGTCAGTAGGGAGGAAATTT  
CATGGGGTACCCCTTCATGAATTGACCTATCTGCAGAGGAAGGACGGGCTAAGTACGTGCC  
AGCAGCCGCGGTAATACGTACCGTCCAAACGTTATTCGGAATTACTGGGCTTAAAGGGTG  
CGTAGGCGGTCCGGAAGTTGTGTGTGAAAGCCCTCGGCTCAACCGAGGAATTGCGCGCA  
AACTACCGGACTTGAGGGAGACAGAGGTAAAGCGGAACCTAAGGTGGAGCGGTGAAATGC  
GTTGATATCTTAAGGAACACCAGGAGCGAAAGCGGCTTACTGGGTCTCTTCTGACGCTGA  
GGCACGAAAGCTAGGGGAGCGAACGGGATTAGAGACCCTTGTAGTCC

>Otu2616

CCGCCTACGGGTCGCTGCAGTAGGGAATTTTCCACAATGGGCGAAAGCCTGATGGAGCAA  
CGCCGCGTGACGGATGAAGGCCTTAGGGTTGTAACTGCTTTTATATGTGAAGAATATGA  
CGGTAGCATATGAATAAGGATCGGCTAACTCCGTGCCAGCAGCCGCGGTCATACGGAGGA  
TCCAAGCGTTATCCGGAATTACTGGGCGTAAAGAGTTGCGTAGGTGGCGCTGTAAGTTGG  
TAGTGAAAGCCTGGGGCTCAACCCCTTACCCATTACCAAACTGCAGAGCTAGAGGACGA  
GAGAGGTAGTTGGAATTCCTAGTGTAGGAGTGAATCCGTAGATATTAGGAGGAACACCG  
ATGGCGTAGGCAGACTACTGGCTCGTTTTCTGACACTAAGGCACGAAAGCATGGGGAGCGA  
CCGGGATTAGAGACCCCACTAGTCC

>Otu2618

CCAGCCTATGGGTGGCACCAGTCGAGAATTTTCTCAATGGGGGAAACCCTGAAGGAGCG  
ACGCCGCGTGAGGAAGAAGGCCTTCGGATTGTAACTCCTGTCACTGCAGAACAAGGAT  
ACGCATGTTAATAGCAAGCGTATTTGATGGTATGCGGAGAGGAAGGGACGGCTAACTCTG  
TGCCAGCAGCCGCGGTAAGACAGAGGTCCCGAGCGTTGTTTCGGATTTCATTGGGCGTAAAG  
GGTGTGTAGGAGGTAGAGTAAGTCAGGTGTGAAATCTCAGAGCTTAACTCTGAACTGCG  
CTTGATACTGCTCTGCTAGAGGATCGGAGGGGGTATCGGAATTTATGGTGTAGCAGTGAA  
ATGCGTAGATATCATAAGGAACACCGGTGGCGAAGGCGGATACCTGGAAGATTCTTGACT  
CTGAAACACGAAAGCCAGGGGAGCAAACGGGATTAGAAACCCCTCGTAGTCC

>Otu2619

CCAGCCTATGGGGGGCAGCAGGCGCGAAAACTTTACAATGCACGAAAGTGTGATAGGGGA  
ATCCAGAGTGCTTATACAATGTATAGGCTTTTGCCAAGAGTAAATATCTTGGAATAAG  
TGGTGGGAAAGACTGGTGCCAGCCGCCGCGGTAACCCAGCGCCACTAGTGGGAATCGCG  
TTTATTGGGCCTAAAGCATCCGTAGCTGGTTTTGTAAATCCCTTGTGAAATTGTTAGGCT  
CAACCTAACAGCGTGCAGGGGACACTGCAGAACTAGGGACCGGGAGGAGTCAGAGGTATG  
TTGAGGGGAGCGGTAAAATGCTATAATCCTCGATAGACCACCTGTGGCGAAGGCGTCTGA  
CTAGAACGGGTCCGACAGTGAGGGATGAAAGCCAGGGGAGCAAACCGGATTAGATACCT  
CGTAGTCC

>Otu2627

CCAGCCTACGGGGTGCAGCAGTGAGGAATATTGCGCAATGGGCACAAGCCTGACGCAGCG  
ACACCGCGTGAAGGATGAAGGCTTTCGGGTCGTAACTTCTGTTAAGTGGGAAGAAAAAG  
CTGGTCCTAATACGACCAGAAAATGACGGTACTACTAGAGAAAGCACCGGCTAACTTCGT  
GCCAGCAGCCGCGGTAAGACGAGGGGTGCAAACGTTATTCGGAATGATTGGGTGTAAAGG  
GTGCGTAGGCGGTATGTTAAGTCAATCGTTAAATTTTTTCAGCTTAACTGAAAGTCAGCGG  
TAGAACTGGCGTACTTGAGGATGGAAGAGAGAAGTAGAATTCTCGGAGTAGCGGTAAAA  
TGCGTAGATCTCGAGAGGAATACCAATGGCGAAGGCAGCTTCTTGGTCCATATCTGACGC  
TGAGGCACGAAAGCGTGGGGAGCAAACAGGATTAGATACCCAGTAGTCC

>Otu2630

CCAGCCTATGCGACGCAGCAGTAGGGAATTTTCCACAATGGGCGAAAGCCTGATGGAGCA  
ACGCCGCGTGCAGGATGAATGCCTTAGGGCTGTAACTGCTTTTATATGTGACGATTATG  
ACGGTAGCATATGAATAAGGATCGGCTAACTCCGTGCCAGCAGCCGCGGTCATACGGAGG  
ATCCAAGCGTTATCCGGAATTACTGGGCGTAAAGAGTTGCGTAGGTGGCATAGTAAGCGA  
ATAGTGAAAGCGTGTGGCTCAACCACATACACATTGTTTGAAGTGTAAAGCTAGAGGATG  
AGAGAGGTTATTGGAATTTCCAGTGTAGGAGTGAAATCCGTAGATATTGGGAGGAACACC  
GATGGCGTAGGCAGATAACTGGCTCATTCCTGACACTGAGGCACGAAAGCGTGGGTAGCA  
AACGGGATTAGATACCTCGTAGTCC

>Otu2631

CCAGCCTACGGGGGGCAGCAGTGGGAAATTTTACGCAATGGGGGAAACCCTGACGTAGCG  
ACACCGCGTGAGCGAAGAAGCCCTTTGGGGTGTAAGCTCTGTCAGCTGGAACGAAAAATA  
CATATGACGGTACCAGCAGAGGAAGCATCGGCTAACTACGTGCCAGCAGCCGCGGTAAGA  
CGTAGGATGCGAGCGTTGTCCGATTTATTGGGCGTAAAGAGTTTCGTAGGTGGTTTTGTTA  
AGTCTGATGTTAAAGATTGGGGCTCAACCCTGAAAATGCATTGATACTGGCAGACTTGAG  
TGTGGTAGAGGCTAGTGGAATTTCCAGTGTAGCGGTGAAATGCGTAGATATTGGGAAGAA  
CACCGGTGGCGAAGGCGGCGACCTGGTCCGACACTGACGCTGAGGCGCGAAAGCGTGGGG  
AGCAAACAGGATTAGATACCCCGTAGTCC

>Otu2632

CCAGCCTATGGGTTGCAGCAGTGAGGAATTTTGGTCAATGGGGGAAACCCTGAACCAGCG  
ACGCCGCGTGTGGGACGAAGGGGCTTTGCCCTGTAAACCACTGTCGGATGGGAAGAAAAAG  
TCCCCTTGGGGGACTGGGACTGTACCATCAAAGGAAGGATCGGCTAACTACGTGCCAGCA  
GCCGCGGTAATACGTAGGATCCAAGCGTTGTCCGATTTACTGGGTGTAAAGGGTGCSCA  
GGCGGACTTGTGCGTCAGAGATTAAATACATCGGCTCAACCGGTGAACCGCCTTTGATAC  
GGCAAGTCTTGAGTGCGAGAGAGGATGGTGGAATTCCTGGTGTAGCGGTGAAATGCGTAG  
ATATCAGGAGGAACACCAGTGGCGAAGGCGGCCATCTGGCTCGCAACTGACGCTCAGGCA  
CGAAAGCGTGGGGAGCAAACAGGATTAGAGACCCTAGTAGTCC

>Otu2633

CCAGCCTATGGGGTGCACCAGTTTGGGAATATTCCACAACGGGCGAAAGCCTGATGGAGCG  
ACACCGCGTGAAGGATGAAGGTCCTCGGATTGTAACTTCTTTAGACCTAGATGAACGTT  
CCATGGTGAATAATCCTGGAATTTGACAGTATAGGTAAAATAAGCCACGGCTAACTCTGT  
GCCAGCAGCCGCGGTAATACAGAGGTGGCAAACGTTGTCCGATTTATTGGGTGTAAAGG  
GCATGTAGGTGGTCTTGTAAGTCAAAGGTGAAATGGCCAGGCTCAACCAGGTCTTTGCCCT  
TTGAACTGCTAGGCTTGAGTACGGAAGAGGAGAGCGGAATTTCCAGTGTAGCGGTGAAA  
TGCGTAGATATTGGGAGGAACACCGGTGGCGAAGGCGGCTCTCTGGTCCGAAACTGACAC  
TGAGATGCGAAAGCCAGGGGAGCAAACGGGATTAGATACCCCGTAGTCC

>Otu2637

CCAGCCTATGGGAGGCTCCAGTGGGGAATCTTGGACAATGGGCGAAAGCCTGACGCAGCG  
ACGCCGCGTGGGTGACGAAGGCCCTTCGGGTTGTAAAGCCCTGTGGGGCGGAACGAACATG  
GGACGGGATAACACCCTGTTTTACTGACGGTACCGCCTTAGCAAGCACCGGCTAACTCTG  
TGCCAGCAGCCGCGGTAAGACAGAGGGTGCAAACGTTGCTCGGAATTACTGGGCGTAAAG

CGCGTGTAGGTGGTCTGATCAGTCGGATGTGAAAGCCCTGGGCTCAACCCAGGAAGTGCA  
TTCGATACTGCCAGACTGGAGTCTTGAAGAGGAGAGCGGAATTCCCGGTGTAGAGGTGAA  
ATTCTGTAGATATCGGGAGGAACACCAGTGGCGAAGGCGGCTCTCTGGGCAATGACTGACA  
CTGAGACGCGAAAGCGTGGGAAGCAAACAGGATTAGATAACCCGTGTAGTCC

>Otu2642

CCAGCCTACGGGTGGCTCCAGTAGGGAATCTTGCACAATGGGCGAAAGCCTGATGCAGCG  
ACGCCGCGTGAGTGACGAAGGCCTTCGGGTGTAAAGCTCTGTTCTCAGGGAAAAAGAAA  
GTGATTGTACCTGAGGAGAAAGGACCGGCTAACTTCGTGCCAGCAGCCGCGGTAAGACGA  
GGGTCCAAGCGTTGTTTCGGAATCATTGGGCGTAAAGCGGGTGTAGGTGGCTCTATAAGT  
CAGGAGTGAAAGCCCCAAGCTTAACTTGGGAAGTGCTTTTGATACTGCAGAGCTTGAGTG  
TGGGAGAGGATCGTGGAATTCCTGGTGTAGTGGTGAAATACGTAGATATCAGGAGGAACA  
CCGGTGGCGAAGGCGGCGATCTGGCCCAACACTGACACTGAGACCCAAAAGCGTGGGGAT  
CAAACAGGATTAGAAACCCGAGTAGTCC

>Otu2643

CCAGCCTATGGGGTGCAGCAGTGGGGAATTTTGGACAATGGGCGAAAGCCTGATCCAGCC  
ATGCCGCGTGAGGATGAAGGCCTTCGGGTGTAAACTGCTTTTGTACGGAACGAAAAGC  
CTCTTTCTAATAAAGAGGGGTTCATGACGGTACCGTAAGAATAAGCACCGGCTAACTACGT  
GCCAGCAGCCGCGTAATACGTAGGGTGCAAGCGTTAATCGGAATTACTGGGCGTAAAGC  
GTGCGCAGGCGGTTTTGTAAAGACAGAGGTGAAATCCCCGGGCTCAACCTGGGAAGTGCCT  
TTGTGACTGCAAGGCTGGAGTGCGGCAGAGGGGGATGGAATTCGCGGTGTAGCAGTGAAA  
TGCGTAGAGATGTGGAGGAACACCGATGGCGAAGGCAGCCCCCTGGGCCAATACTGACGC  
TCATGCACGAAAGCGTGGGGAGCAAACAGGATTAGAGACCCCTCGTAGTCC

>Otu2655

CCAGCCTATGGGGCGCTGCAGTCGAGAATTTTTCACAATGGACGTAAGTCTGATGGAGCG  
ACGCCGCGTGAGGATGAAGGTTTTTCGGATTGTAAACTCCTGTCACTGCAGAACAAGGAT  
GTGTTGATGGATAGTCAATGCATTTGATGGTATGCGGAGAGGAAGAGACGGCTAACTCTG  
TGCCAGCAGCCGCGTAATACAGAGGTCTCAAGCGTTGTTTCGGATTCAATTGGGCGTAAAG  
GGTGCGTAGGCGGCGAAGCAAGTCAGGTGTGAAATCCCCGGGGCTCAACCCCGGAAGTGC  
TTTGATACTGCTTTGCTTGAGGACTGGAGAGGAGATCGGAATTCACGGTGTAGCAGTGAA  
ATGCGTAGATATCGTGAGGAAGGCCAGTGGCGAAGGCGGATCTCTGGACAGTTCTCTGACG  
CTGAGGCACGAAGGCCAGGGGAGCAAACGGGATTAGAGACCCCTGTAGTCC

>Otu2656

CCAGCCTACGGGAGGCTCCAGTGGGGAATATTGGACAATGGGGGCAACCCTGATCCAGCC  
ATGCCGCGTGGGTGAAGAAGGCCTTCGGGTGTAAAGCCCTTTTGTACGGGAAGAAAAGC  
TTTCGGTGAATATCCGGAGGTTCATGACGGTACCGTAAGAATAAGCACCGGCTAACTTCGT  
GCCAGCAGCCGCGTAATACGAAGGGTGCAAGCGTTACTCGGAATTACTGGGCGTAAAGC  
GTGCGTAGGTGGTTTTGTAAAGTCTGATGTGAAATCCCCGGGCTCAACCTGGGAATGGCAT  
TGGAAGTGGCAGGCTAGAGTGCGGTAGAGGGTGGTGGAATTCGCGGTGTAGCAGTGAAA  
TGCGTAGAGATCGGGAGGAACATCTGTGGCGAAGGCGGCCACCTGGACCAGCACTGACAC  
TGAGGCACGAAAGCGTGGGGAGCAAACAGGATTAGATAACCCCTGTAGTCC

>Otu2657

CCAGCCTATGGGATGCAGCAGTCGAGAATCTTCCACAATGGACGAAAGTCTGATGGAGCG  
ACGCCGCGTGTTGATGAAGTCCTTCGGGACGTAAAAACCTTTTATGAGCCACTAAGTTA  
TTGAAGAGCTCATGAATAAGGGGTTGCTAAACTCGTGCCAGCAGCAGCGTAATACGAGT  
GCCCCAAGCGTTATCCGGAATCATTGGGCGTAAAGGGTGTGTAGGTGGTCGTATTAGTCT  
TGTGTTAAATCCTTAGGCTTAACCTAAGGCATGCATAGGAAACGGTACGACTAGAAGATG  
CGAGGGGTGAATGGAAGTTCATAGTGGAGGGGTGAAATCCGTTGATATTATAGGGAACACC  
AAAAGCGAAGGCAATTCCTGCGCATTCCTGACACTGAAACACGAAAGCGTGGGTAGCG  
AATGGGATTAGAAACCCGCGTAGTCC

>Otu2660

CCAGCCTACGGGTTCACCAGTGGGGAATCTTGGTCAATGGGCGCAAGCCTGAACCAGCG  
ACGCCGCGTGAGTGATGAAGGCCTTCGGGTGTAAAGCTCTGTGGGGAGGGACGAAAGAC  
TGAGGTCTAATAGGCTTCAGGTTGACGGTACCTCCTTAGCAAGCACCGGCTAACTCTGTG  
CCAGCAGCCGCGTAAGACAGAGGGTGCAAACGTTGCTCGGAATCACTGGGCGTAAAGGG  
CGTGTAGGCGGATCGGCAAGTCGGGCGTGAAATCCCTGGGCTCGACCCAGGAAGTGCAT  
CGAAAGTGCCTTTCTTGAGTGCCGGAGAGGAAAGCGGAATACCTGGTGTAGAGGTGAAAT  
TCGTAGATATCAGGTGGAACACCAGTGGCGAAGGCGGCTTTCTGGACGGTAACTGACGCT  
GAGACGCGAAAGCGTGGGGAGCAAACAGGATTAGATAACCCCGTAGTCC

>Otu2661

CCAGCCTACGGGATGCTGCAGTCGAGGATCTTCGGCAATGGGCGCAAGCCTGACCGAGCG  
ACGCCGCGTGTGCGAAGAAGGCCTTCGGGTGTAAAGCACTGTGAGGGGGAGGAAAGCC  
CGCAAGGGTCTGACCTATCCCTGGAGGAAGCACGGGCTAAGTTCGTGCCAGCAGCCGCGG  
TAAGACGAACCGTGCGAACGTTGTTTCGGATTCACTGGGCTTAAAGGGCGCGTAGGCGGGC  
CATCAAGTCTGTGGTGAAAGCCCCCGGCTTAACCGGGGAAGTGCCGTGGATACTGGTGGT  
CTCGAGGGGTGCAGGGGCATGCGGAACCTTCGGTGGAGCGGTGAAATGCGTAGATATCGG  
AAGGAACGCCGTGGCGAAAGCGGCGTGCTGGACACCTACTGACGCTGAGGCGCGAAAGC  
CAGGGGAGCAAACGGGATTAGATACCCCCGTAGTCC

>Otu2662

CCAGCCTATGGGTGGCTCCAGTAAGGAATATTGGACAATGGACGCAAGTCTGATCCAGCC  
ATGCCGCGTGAAGGATGAAGGTCCTCTGGATTGTAAACTTCTTTTATGTGGGACGAAAAA  
AGGGGATTCTTCCTCGTCTGACGGTACCATATGAATAAGCACCGGCTAACTCCGTGCCAG  
CAGCCGCGGTAATACGGAGGGTGCAAGCGTTATCCGGATTCACTGGGTTTAAAGGGTGCG  
TAGGCGGGTATGTAAGTCAGTGGTGAAATCTCAGAGCTTAACTCTGAAACTGCCATTGAT  
ACTATATGTCTTGAATATTGTGGAGGTAAAGCGGAATATGTCATGTAGCGGTGAAATGCTT  
AGATATGACATAGAACACCCATTGCGAAGGCAGCTTACTACACATATATTGACGCTGAGG  
CACGAAAGCGTGGGGAGCAAACCGGATTAGAAACCCTTGTAGTCC

>Otu2663

CCAGCCTATGGGGCGCTCCAGTCGAGGATCTTCGGCAATGGACGCAAGTCTGACCGAGCG  
ACGCCGCGTGCGGGATGAAGGCTTTCGGGTGTAAACCGCTGTCAGTGGGGAGGAAATCG  
GTGAGGGTAATCTCTCATTGTTGACCTATCCGCAGAGGAAGCAGGGGCTAAGTTCGTGCC  
AGCAGCCGCGGTAAGACGAACCTTGCTAACGTTATTTCGGAATTACTGGGCTTAAAGGGTG  
CGTAGGCGGTGCAGAAAGTCGGGTGTGAAATCCCTCAGCTCAACTGAGGAATTGCGTCCG  
AAACTACTGTGCTTGAGGAAGATAGAGGTACGCGGAACCTAGGGTGGAGCGGTGAAATGC  
GTTGATATCCTAAGGAACACCGGTGGCGAAAGCGGCGTACTGGGTCTTATCTGACGCTGA  
GGCACGAAAGCTAGGGTAGCGAACGGGATTAGAAACCCTTGTAGTCC

>Otu2669

CCAGCCTATGGGTCGCTGCAGTGAGGAATATTGCGCAATGGGGGAAACCCTGACGCAGCG  
ACGCCGCGTGGAGGAAGAAGGTTTTTCGGATTGTAAACTCCTGTCAGTGGGGAAGAGAATG  
GACGGTACCCACTGAGGAAGCTTTCGGCTAACTACGTGCCAGCAGCCGCGGTAAGACGTAG  
GGAGCGAGCGTTGTCCGGAATTACTGGGCGTAAAGAGCTCGTAGGCGGGACCGTAAGTCC  
GAGAGGAAATCTCAAGGCTCAACTTTGGGGCTTCTTCGGATACTGCGGTTCTTGAGGATA  
TCAGAGGAAAGTAGAATTCCCGGTGTAGCGGTGAAATGCGTAGATATCGGGAGGAATACC  
AGTGCGGAAGGCGACTTCTGGGATATTCTTAACGCTGAGGAGCGAAAGCGTGGGGAGCA  
AACGGGATTAGATACCCTTGTAGTCC

>Otu2671

CCAGCCTATGGGTGGCACCAGTAAGGAATCTTCCGCAATGGGCGAAAGCCTGACGGAGCA  
ACGCCGCGTGCAGGATGACGGCCTTCGGGTGTAAACTGCTTTTATTTGGGAAGATTATG  
ACGGTACCAAATGAATAAGGACCGGCTAACTACGTGCCAGCAGCCGCGGTAATACGTAGG  
GTCCAAGCGTTATCCGGAATCACTGGGCGTAAAGAGTGCGTAGGCGGGAGTCTAAGTGCA  
ATGCGAAATCCTGTGGCTCAACCATATGGACTGTATTGCATACTGGACACCTAGAGGATA  
TGAGAGGCAAGTGGAATTACCGGTGTAGCAGTGAAATGCGTAGATATCGGTAGGAACACC  
AATGGCGAAGGCAGCTTGCTGGCATATTTCTGACGCTAAGGCACGAAAGCGTGGGGAGCG  
AACAGGATTAGATACCCGTGTAGTCC

>Otu2674

CCAGCCTACGGGAGGCAGCAGTCGAGAATCTTTCGCAATGGGCGAAAGCCTGACGAAGCG  
ACGCCGTGTGTGATGAAGGCCCTCGGGTCGTAAAGCACTTTCGCCTGGGAACAAGAAA  
TTCCGGCTAATATCCGGGAAATTTGAGAGTACTAGGTAAAGAAGCACCGGCTAACTACGT  
GCCAGCAGCTGCGGTAATACGTAGGGTGCAAGCATTAATCGGATTTATTGGGCGTAAAGG  
GCGCGTAGGCGGAAATGCCAGTCAGATGTGAAATCCCGGGGCTCAACCCCGGAACAGCAT  
TTGAAACTACATTTCTAGAGGGTAGGCGGAGAAAACGGAATTCACAAGTAGCGGTGAAA  
TGCGTAGATATGTGGAAGAACACCAAGTGGCGAAGGCGGTTTTCTAGCTTATACCTGACGC  
TGAGGCGCGAAGGCAAGGGGAGCAAACAGGATTAGATACCCGTGTAGTCC

>Otu2675

CCAGCCCGGGGTGCAGCAGTCGGGAATTTTGCTCAATGGGCGAAAGCCTGAAGCAGCAAC  
GCCGCGTGCGGGATGAAGGCCCTTCGGGTGTAAACCGCTTTTACCAGGGACGATGATGAC  
GGTACCTGATGAATAAGTCACGGCTAACTACGTGCCAGCAGCCGCGGTAATACGTAGGTG

ACCAGCGTTGTCCGGATTTACTGGGCGTAAAGAGCGCGCAGGCGGTTCGTCCAAGTCGAGT  
GTGAAAGCCCCCGGCTCAACTGGGGAGGGTCACTCGATACTGATCGACTCGAAGGCAGGA  
GAGGGAAGCGGAATTCCTGGCTGTAGTGGTGAAATGCGTAGATATCGGGAGGAACACCAGT  
GGCGAAGGCGGCTTCCTGGCCTGTTCTTGACGCTGAGGCGCGAAAGCTAGGGGAGCAAAC  
GGGATTAGAAACCCTCGTAGTCC

>Otu2681

CCAGCCTATGGGTTGCACCAGTCGAGGATCTTCGGCAATGGGCGCAAGCCTGACCGAGCG  
ACGCCGCGTGTGGGATGAAGGCCTTCGGGTGTAAACCACTGTCAGAGGGGATGAAATTC  
CTGGGGGTTCTCCCCCAGGATTGACATATCCTCAGAGGAAGTACGGGCTAAGTTCGTGCC  
AGCAACCGCGGTAAGATGAACCGTACGAACGTTATTTCGGAATCACTGGGCTTAAAGGGTG  
CGTAGGCGGCGCGGAAAGTTGGGTGTGAAATCCCTCGGCTTAACCGAGGAATTGCGCTCA  
AAACTGTCGTGCTCGAGGGAGATAGAGGTGAGCGGAACTTAGGGTGGAGCGGTGAAATGC  
GTTGATATCCTAAGGAACACCGGTGGCGAAGGCGGCTCACTGGATCTCTTCTGACGCTGA  
GGCACGAAAGCTAGGGGAGCGAACGGGATTAGAAACCCGGGTAGTCC

>Otu2683

CCAGCCTATGGGGGGCTGCAGTCGAGAATCTTCGGCAATGGGGGCAACCCTGACCGAGCG  
ACGCCGCGTGCAGATGAAGGCCTTCGGGTGTAAATCGCTGTCAGTGGGGAGGAAATGC  
CGGTGGGTTCTCTCATCGGTTTGACCTATCCGCAGAGGAAGGACGGGCTAAGTTCGTGCC  
AGCAGCCGCGGTAAGACGAACCGTCCAAACGTTATTTCGGAATCACTGGGCTTAAAGGGTG  
CGTAGGCGGCCCCGGGAAGTTGGGTGTGAAATCCCTCGGCTCAACCGAGGAATTGCGCCCA  
AAACTGCCGGGCTCGAGGAAGACAGAGGTGAGCGGAACTTAGGGTGGAGCGGTGAAATGC  
GTTGATATCCTAAGGAACACCGTAGCGAAAGCGGCTCACTGGGTCTTTTCTGACGCTGA  
TGCACGAAAGCTAGGGGAGCGAAGAGGATTAGATACCCCGGTAGTCC

>Otu2684

CCAGCCTACGGGGGGCAGCAGTGGGGAATATTGCTCAATGGGCGAAAGCCTGAAGCAGCG  
ACGCCGCGTGAACGATGAAGTCCTTCGGGATGTAAAGTTCTTTTCGTCAGGGACAATTATG  
ATGGTACCTGAATAAGAAGGCCCGGCTAACTATGTGCCAGCAGCCGCGGTAATACATAGG  
GGCCAAGCGTTATCCGGATTTATTGGGCGTAAAGCGCGCGTAGGTGGTCGATCAAGTCGG  
GTGTCAAATTTGGAAGCTCAACTTCCATACGCGCCCGAAACTGTTTCGGCTTTGAGGTCCG  
TAGAGGGAAGTGGAACCTCACAGTGTAGCGGTGAAATGCGTAGATATTGTGAGGAACACCA  
GTGGCGAAGGCGACTTCCTGGCCCGTACCTGACGCTAAAGTGCAGAAAGCATGGGGAGCAA  
ACAGGATTAGAGACCCTCGTAGTCC

>Otu2685

CCAGCCTATGGGACGCACCAGTGAAGAATATTGGTCAATGGACGCAAGTCTGAACCAGCC  
ATGCCGCGTGAAGGATGAAGGCCCTATGGGTTGTAAACTTCTTTTATATGGGACGAATCT  
CCCGCTCGTGAGCGGGATTGACGGTACTGTACGAATAAGCAACGGCTAACTCCGTGCCAG  
CAGCCGCGGTAATACGGAGGTGCAAGCGTTATCCGGATTTATTGGGTTTAAAGGGTGCG  
TAGGCGGGACAATAAGTCAGTGGTGAAAGCCTGCAGCTTAACTGTAGAACTGCCATTGAT  
ACTGTTGTTCTTGAGTATAGTTGAGGTGGGCGGAATGTGTAATGTAGCGGTGAAATGCTT  
AGATATTACACAGAACACCAATTGTGTAGGCAGCTCACTAACTAAAAGTACGCTGAGG  
CACGAAAGCGTGGGGAGCAAACAGGATTAGATACCCCTGTAGTCG

>Otu2686

CCAGCCTATGGGTGGCACCAGTGGGGAATATTGGACAATGGGCGAAAGCCTGATCCAGCA  
ACGCCGCGTGAGGGATGAAGCTCTTCGGGGTGTAAACCTCTGTAGGAAGGAAAGAAACCA  
TGACGGTACTTTCAAAGTAAGCCCCGGCTAACTCCGTGCCAGCAGCCGCGGTAATACGGA  
GGGGGCTAGCGTTACTCGGAATCACTGGGCGTAAAGCGCACGTAGGCGGTTTTCTAAGTT  
TTTCGTGTAATCTCCCGGCTTAACTGGGAACCCGCGGAAAATACTGGGAGATTGGAGTAT  
GGTAGAGGAGAGCGGAATTCCTGGTGTAGCGGTGAAATGCGTAGATATCAGGAGGAACAC  
CCGTGGCGAAAGCGGCTCTCTGGACCATTACTGACGCTGAGGTGCGAAAGCCAGGGGAGC  
GAACGGGATTAGATACCCCGGTAGTCC

>Otu2688

CCAGCCTACGGGGCGCAGCAGTTGATTCAAGTGGGCGGCAAAGCCGAAAGCCGCTTGTGG  
CGCGAACTCGTGGAACGCCATCACTATCTCGCATGCCGGGTGCCGCTTGGCGCCCACCTG  
CGCTACTTTGTGCGAGATCGCGAACGGGAGTTGGCCTGTCTGCTCTGGATTCTCGCCAGC  
TTGGAAGATGGAGCCCCGCGATGCCTGGATCGGATGGAGCGATGAGCAGCGGCGTCGCAA  
CCTGTAGTCGATCGTGAACAAATGGCCGCTTCTGGATCTTGCCATGGGTGCATGTCAAAGG  
ACTGGCCAGCAAGGTCCTGGCACTGAGCGCTCGGCAAGTGCCGAGCGACTGGAAAATCCG  
CTATGGACCTCGCCCTCTGCTATTAGAAACCTTGTAGTCC

>Otu2689

CCAGCCTATGGGTTGCAGCAGTGGGGAATCTTGCGCAATGGGCGAAAGCCTGACGCAGCG  
ACGCCGCGTGGGTGATGAAGGCCTTCGGGTGTAAAGCCCTGTGGGGAGGGACGAATAAA  
CCATGGCTAATATCCATGGCGATGACGGTACCTCTTTAGCAAGCACCGGCTAACTCTGTG  
CCAGCAGCCGCGGTAAGACAGAGGGTGCGAACGTTGTTTCGAATTACTGGGCGTAAAGCG  
CGTGTAGGTGGCATCGCAAGTCGGGTGTGAAAGCCCGGGGCTCAACCCCGGAAGTGCATT  
CGATACTGCGGAGCTAGAGTCTCGGAGAGGATGGTGGAACTCTCGGTGTAGAGGTGAAAT  
TCGTAGATATCGAGAAGAACACCGGCGGCGAAGGCGGCCATCTGGACGATGACTGACACT  
GAGACGCGAAAGCGTGGGGAGCAAACAGGATTAGATACCCTTGTAGTCC

>Otu2690

CCAGCCTATGGGGGGCAGCAGTGGGGAATCTTGGACAATGGGGGAAACCCTGATCCAGCC  
ATGCCGCGTGAGTGATGAAGGCCTTAGGGTTGTAAACTCTTTCGACGGGGACGATAATG  
ACGGTACCCGTAGAAGAAGCTCCGGCTAACTTCGTGCCAGCAGCCGCGGTAATACGAAGG  
GGGCTAGCGTTGTTTCGAATTACTGGGCGTAAAGCGTGCGCAGGCGGCTCATCAAGTCAG  
GGGTGAAAGCCCAGAGCTCAACTCTGGAATTGCCTTTGAAACTAGTGAGCTTGAGTACGG  
GAGAGGTGAGTGGAATTCCGAGTGTAGAGGTGAAATTCGTAGATATTCGGAAGAACACCA  
GTGGCGAAGGCGGCTCACTGGACCGTAACCTGACGCTCATGCACGACAGCGTGGGGAGCAA  
ACAGGATTAGAAACCCGGGTAGTCC

>Otu2693

CAGCCTATGGGTCGCTGCAGTAACGAATATTCGCAATGGGCGCAAGCCTGACGGAGCGA  
TGCCGCGTGTGGGACGAAGCCCTTCGGGGTGTAAACCACTGTCAGGGTTTAGCAAGAGCG  
TGAGCAAACCCAAAGGAAGAGGCGACTAACTCTGTGCCAGCAGTCGCGGTAATACAGAGG  
CCTCGAGCGTTAATCGGAATCACTGGGCTTAAAGGGTGCGTAGGCGGCTTCGTAAGTGCC  
TTGTGAAATCCCATGGCTCAACCATGGAAGTCTCGGCAGACTGCGGAGCTTGAGGTGG  
TAGGGGCTGCTGGAAGTCTAGGTGGAGCGGTGAAATGCGTAGATATCTAGAGGAACGCCG  
ACGGTGAAGACAGGCAGCTGGGCCAAAACCTGACGCTGAGGCACGAAAGCGTGGGGAGCGA  
ACGGGATTAGATACCCTCGTAGTCC

>Otu2694

CCAGCCTATGGGGTGCTGCAGGTCGGATTACCGGGACCAGTGAAGGCGGTGTTCTTCCGC  
AGAGTGGTGAGGGTTCCCGTCGAGGAGTTGATCACCGCACCGGTGATCGTGCTGTCCGCA  
TAATTGGCGGTGTAGAGATACTGGTTCGAGGGGTCTCAAGAATGCATTGCGGAGCCGAG  
CCGGCGCCAAAGATAACGCTGGTCCCGCTAGCTCCACCGGACAGGGTCGTCAATCTGCCT  
GTAGTCGGGTGACGAAGAAGGCGCTGACCGAAGTCTGCTGGACCGCTTGCAATTGAGATTG  
GGTCCCTGGTTTGCTACATAAAGAACTTGCCAGTATGGTCCACCAGCATAGGTCCAGGA  
TTTGCGACAGTCCCGGTATTGTCTACAGCTCCGCCAACCCAGCGATTAGAGACCCTTGTA  
TCC

>Otu2695

CCAGCCTACGGGGGGCACCAGTCGAGAATCTTCGGCAATGGGCGCAAGCCTGACCGAGCG  
ACGCCGCGTGTGCGATGAAGGCCTTCGGGTGTAAAGCACTGTGAGGGGGAGGAAGGGC  
AACTTGACCGACCCCTGGAGGAAGCACGGGCTAAGTTCGTGCCAGCAGCCGCGGTAAGAC  
GAACCGTGCGAACGTTATTTCGAATCACTGGGCTTAAAGGGCGCGTAGGCGGGCGATCAA  
GTCAGAGGTGAAAGCCTCCCGCTCAACGGGAGAAGTGCCCTGATACTGGTTGTCTCGAG  
GGAGGTAGGGGCATGTGGAAGTTCGGGTGGAGCGGTGAAATGCGTAGATATCGGAAGGAA  
CGCCGGTGGCGAAAGCGACGTGCTGGACCTCTTCTGACGCTGAGGCGCGAAAGCTAGGGG  
AGCAAACGGGATTAGATACCCTCGTAGTCC

>Otu2701

CCAGCCTATGGGGGGCACCAGTCGAGGATCTTCGGCAATGGGCGCAAGCCTGACCGAGCG  
ACGCCGCGTGTGCGATGAAGGCCTTCGGGTGTAAAGCACTGTGAGGGGGAGGAACGCC  
CGCAAGGGTTTGACCTATCCCTGGAGGAAGCACGGGCTAAGTTCGTGCCAGCAGCCGCGG  
TAAGACGAACCGTGCGAACGTTGTTTCGATTCACTGGGCTTAAAGGGCGCGTAGGCGGGT  
TTTCAAGTCCGGGGTGAAATACTCTCGCTCAACGAGAGAACTGCCCCGGATACTGGAGAT  
CTCGAGGGAGGTAGGGGCATGTGGAAGTTCGGGTGGAGCGGTGAAATGCGTAGATATCGG  
AAGGAACGCCGTGGCGAAAGCGACGTGCTGGACCTCTTCTGACGCTGAGGCGCGAAAGC  
CAGGGGAGCAAACGGGATTAGATACCCTCGTAGTCC

>Otu2706

CCAGCCTATGGGACGCTCCAGTGAGGAATATTGGACAATGGGCGCAAGCCTGATCCAGCC  
ATGCCGCGTGAGTGATGAAGGCCTTAGGGTTGTAAAGCTCTTTTGTCCGGGAAGATAATG  
ACTGTACCGGAAGAATAAGCCCCGGCTAACTTCGTGCCAGCAGCCGCGGTAATACGAAGG

GGGCTAGCGTTGTTTCGGATTTACTGGGCGTAAAGCGCACGTAGGCGGATCTTTAAGTCAG  
AGGTGAAATCCCAAGGCTCAACCCTGGAAGTGCCTTTGATACTGGGGATCTTGAGTTCGG  
GAGAGGTGAGTGGAAGTGCAGTGTAGAGGTGAAATTCGTAGATATTCGCAAGAACACCA  
GTGGCGAAGGCGGCTCACTGGCCCGATACTGACGCTGAGGTGCGAAAGCGTGGGGAGCAA  
ACAGGATTAGATACCCCAGTAGTCC

>Otu2707

CCAGCCTATGGGTGGCACCAGTGGGGAATTTTGC GCAATGGGGGAAACCCTGATCCAGCA  
ATGCCGCGTGAGTGAAGAAGGTCTTAGGATTGTAAAGCTCTTTCGGTGGGGACGATGATG  
ACGGTACCCACAGAAGAAGCCCCGGCTAACTTCGTGCCAGCAGCCGCGGTAATACGAAGG  
GGGCTAGCGTTGCTCGGAATGACTGGGCGTGAAGGGCGCGTAGGCGGCTTGTATAGTCAG  
ATGTGAAATTCTGGGCTCAACCTGGGGACTGCATTTGATACGTGCAGGCTTGAGTGTGG  
AAGAGGGTCGTGGAATTCCCACTGTAGAGGTGAAATTCGTAGATATTGGGAAGAACACCG  
GTGGCGAAGGCGGCGACCTGGTCCATAACTGACGCTGAGGCGCGAAAGCGTGGGGAGCAA  
ACAGGATTAGATACCCCAGTAGTCC

>Otu2711

CCAGCCTACGGGGGGGCTGCAGTCGAGAATCTTCGGCAATGGGCGCAAGCCTGACCGAGCG  
ACGCCGCGTGAGGACGAAGGCCTTCGGGTTGTAAACTCCTGTGAGGAGGAGGAAGGGG  
CCGTGCAGAACGGTTCTTGACCGATTCTTGAGGAAGCACGGGCTAAGTTCGTGCCAGCA  
GCCGCGGTAAGACGAACCGTGCGAACGTTATTTCGGAATTACTGGGCTTAAAGCGCGTGTA  
GGCGGGTCGGCACGTCCGCGGCTGAAATCCCCCTGGCTCAACCAGGGAAGTGGCCCCGATA  
CGACCGGTCTGGAGGGGGGTAGGGGAATCGGGAACTCACGGTGGAGCGGTGAAATGCGTT  
GAGATCGTGAGGAACGCCCGTGCGGAAAGCGCGGTTCTGGACCCACCTGACGCTGAGAC  
GCGAAAGCCAGGGGAGCGAACGGGATTAGATACCCTAGTAGTCC

>Otu2713

CCAGCCTACGGGGTGCTCCAGTCGAGAATTTTTCTCAATGGGCGAAAGCCTGAAGGAGCG  
ACGCCGCGTGGGGGATGAATGGCTTCGGCCCGTAAACCCCTGTCATTTGCGAACAAATGG  
TTTTACCTAACACGTAAAGCCTTGATAGTAGCGGAAGAGGAAGGGACGGCTAACTCTGTG  
CCAGCAGCCGCGGTAATACAGAGGTCCCAAGCGTTGTTTCGGATTCACTGGGCGTAAAGGG  
TGCGTAGGCGGCCGGGTAAGTCTGATGTGAAATCCCGCAGCTCAACTGCGGAACGGCATT  
GGATACTATTTCGGCTAGAGGAGTGGAGGGGAGACTGGAATACTTGGTGTAGCAGTGAAAT  
GCGTAGATATCAAGTGGAACACCAGTGGCGAAGGCGAGTCTCTGGACACTTCCTGACGCT  
GAGGCACGAAAGCCAGGGGAGCAAACGGGATTAGAAACCCGCGTAGTCC

>Otu2714

CCAGCCTACGGGGGGCAGCAGTGGGGAATCTTGACACAATGGGCGAAAGCCTGATGCAGCA  
ACGCCGCGTGGGTGAAGAAGGTTCTCGGATTGTAAAGCCCTTTCGGCTGGGGAGAAGGGT  
GTCATGGTGAATAATCACGGCATCTGACGGTACCAGAAGAAGAAGCACCGGCTAATTTTCG  
TGCCAGCAGCCGCGGTAATACGAAAGGTGCAAGCGTTGTTTCGGAATGACTGGGCGTAAAG  
CGCACGTAGGCGGGTTTGCAAGTAGGATGTGAAAGCCCCAGGCTTAACCTGGGAATGGCA  
TCTTAAACTACAAACCTTGAATGCTTGAGAGGTTGGTGGAAATGCCTGGTGTAGGAGTGAA  
ATCCGTAGATATCAGGTGGAATATCGGAGGCGAAGGCGGCCAACTGGTGGTGCATTGACG  
CTAAGGTGCGAAAGCGTGGGGAGCAAACAGGATTAGATACCCGCTGTAGTCC

>Otu2717

CCAGCCTACGGGGTGCTGCAGTCGAGAATTTTTCTCAATGGGCGAAAGCCTGAAGGAGCG  
ACGCCGCGTGGGGGATGAATGGCTTCGGCCCGTAAACCCCTGTCATTTGCGAACAAATTA  
TTTTACCTAACACGTGAAGTATTGATTGTAGTAGAAGAGGAAGGGACGGCTAACTCTGTG  
CCAGCAGCCGCGGTAATACAGAGGTCCCAAGCGTTGTTTCGGATTCACTGGGCGTAAAGGG  
TGCGTAGGCGGTCGGGTAAGTCTGATGTGAAATCTCCAAGCCTAACTTGGAACCTGCATT  
AGATACTATACGGCTCGAGGAATGGAGGGGAGACTGGAATACTTGGTGTAGCAGTGAAAT  
GCGTAGATATCGTGAGGAAGGCCAGTGGCGAAGGCGGATCTCTGGACAGTTCTTGACGCT  
GAGGCACGAAGGCCAGGGGAGCAAACGGGATTAGATACCCGCGTAGTCC

>Otu2719

CAGCCTACGGGGGCACCAGTAACGAATCTTCCGCAATGCACGAAAGTGTGACGGAGCGAC  
GCCGCGTGAGGATGAAGTCTTCGGGATGTAAACTACTGTCAGGGGAAAGAAAGTTCTG  
ATCTACCCAGAGGAAGAGGCGGCTAACTCTGTGCCAGCAGCCGCGGTAATACAGAGGCC  
TCGAGCGTTAGGCGGAATCACTGGGCTTAAAGCGTGTGTAGGTGGATGCCTAAGTGTCTT  
GTGAGATCCCATGGCTTAACCATGGAATTGCTTGACATACTGGGTGTCTTGAGCCACTCA  
GGGGCTACTGGAACAAGCGGTGGAGCGGTGAAATGCGTAGATATCGCTTGAACGCCAAT  
GGTGAACACAGGTAGCTGGGGGTGTGCTGACACTGAGACACGAAAGCCAGGGGAGCAAAC

GGGATTAGAAAACCCTAGTAGTCC

>Otu2721

CCAGCCTACGGGGCGCACCAGCAGATGATCGACTCGATGCCGTGCGGCGTGCTGGTTGTG  
GATACCGCCGATGCGATTGTGATGATCAATCCGGAGAGCCGGCGGCTGTTGGAATTGGGT  
AGCAAGCGCGTCAAAAGCTTGC GCGATCTCGCGGCGATCAGCCAGGTAGACTTTGAGTCT  
CTAATGGATGGCTCAGCGGACCAGCTTGACACGGAAGTGTGCGTTCTGCCACGGAAGGT  
CAGCGCTGGCTGGCGATTGGCAACCGAAAACTAATGAGTGCATCGGCCAGCCAAGGACCA  
GGAAATGAGAGAGCCGCGCTGCAGAGTATCTGGATTCTCCGGGACATTACGGCAAGCAAA  
CAGGCCGAGCGGGAACGCGAAGCCGCGCGCAGCGCGATGGCACTGGCAGAGGTTGCGACG  
ATCCTGGCACACGAAATTAGAAAACCCAGTAGTCC

>Otu2723

CCAGCCTACGGGGTGCGAGCAGTGGGGAATATTGGACAATGGGCGCAAGCCTGATCCAGCA  
ATGCCGCGTGAGTGATGAAGGCCTTCGGGTTGTAAAGCTCTTTCGTCTGCGACGATGATG  
ACGGTAGCAGAAGAAGAAGCCCCGGCTAACTTCGTGCCAGCAGCCGCGGTAATACGAAGG  
GGGCTAGCGTTGTTTCGGAATTACTGGGCGTAAAGGGCGCGTAGGCGGTTGATCAAGTCAG  
GCGTGAAAGCCCCGGGCTTAACCTGGGAAAATGCGCTTGAGACTGGCCGGCTTGAGTTCGG  
GAGAGGCGAGTGGAATTCACAGTGTAGAGGTGAAATTCGTAGATATTGGGAAGAACACCA  
GTGGCGAAGGCGGCTCGCTGGACCGAACTGACGCTGAGGCGCGAAAGCGTGGGGAGCAA  
ACAGGATTAGAGACCCAGTAGTCC

>Otu2728

CCAGCCTATGGGTTGCTGCAGTAAGGAATATTGGTCAATGGACGAAAGTCTGAACCAGCC  
ATGCCGCGTGAGGATGAAGGCCCTCTGGGTTGTAAACTCTTTTATCTGGGACGAAAAA  
AGGGAATCTTTCCCACTTGACGGTACCAGAGGAATAAGCACCGGCTAACTCCGTGCCAG  
CAGCCGCGGTAATACGGAGGGTGCAAGCGTTATCCGGATTTACTGGGTTTAAAGGGTGCG  
TAGGTGGGTAGGTAAAGTCAGTGGTGAAATCTTCGAGCTTAACCTCGGAACTGCCATTGAT  
ACTATTTATCTTGAATTTTGTGAGGTAGGCGGAATAAGTCATGTAGCGGTGAAATGCAT  
AGATATGACTTAGAACACCAATTGCGAAGGCAGCTTGCTAAACAAATATTGACGCTGAGG  
CACGAAAGCGTGGGGATCAAACAGGATTAGAAAACCTGGTAGTCC

>Otu2729

CCAGCCTACGGGAGGCAGCAGTCGAGAATCATTCGCAATGGGCGAAAGCCTGACGATGCG  
ACGCCGTGTGAGCGATGAAGGCCTTAGGGTCGTAAAGCTCTTTCGCTTGGAACAAGAGA  
CGCAGGCTAATATCCTGCAAAATTTGAGGGTACCAGGTAAAGAAGCACCGGCTAACTCCGT  
GCCAGCAGCTGCGGTAATACGGAGGGTGCAAGCATTAATCGGATTTATTGGGCGTAAAGG  
GCGCGTAGGCGGAGCGATAAGTCAGATGTGAAATCCCGGGGCTCAACCCCGGAACAGCAT  
TTGAAGCTGTCAATTCTAGAGGATAGATGGAGAAAACGGAATTCACAAGTAGCGGTGAAA  
TGCGTAGATATGTGGAAGAACACCGGTGGCGAAAGCGGTTTTCTAATTTAGACCTGACGC  
TGAGGCGCGAAAGCAAGGGGATCAAACAGGATTAGATACCCTGGTAGTCC

>Otu2733

CCAGCCTATGGGTTGCACCAGGTACGAAGTCTCCGCAATGCACGAAAGTGTGACGGGGGA  
ACTCCAAGTGAATTGCTTTTCGAGCAATTCTGTACAGAAGTGTAATAGCTTCTGGAGAAA  
GGGGTGGGTAAAGACCGGTGCCAGCAGCCGCGGTAATCCCGGCACCTCAAGTAGTGACCGC  
TATTATTGGGCCATAAGAATCCGTAGCCGGATTAATAAGTTCCCTGTGAAATCGCGCAGC  
TTAACTGTGCGGCGTGACAGGAATACTGTTCAATCTAGGAACCGGGTGGGGTCACGGGT  
CTCCTGGGGTAGCGGTTAAATGTTGTAATCCAGGAAGACCAACAGTGGTGGAGACGAGT  
GACTAGAACGGGTTTCGACGGTGAATGGATGAAAGCTGGGGGAGCAAAGCGGATTAGATAC  
CCGTGTAGTCC

>Otu2740

CCAGCCTATGGGGGGCTCCAGTTAGGAATCTTCTGCAATGCGCGAAAGCGTGACAGAGCG  
AGTCAGAGTGCTTTTCAACTGAAAGGCTTTTGCTAGATGTAAAGAGTCTGGCGAATAAGG  
ACTGGGTAAGACTGGTGCCAGCCGCCGCGGTAATACCAGCGGTCCAAGTCGCAGCCATCA  
TTATTGGGTCTAAAACATCCGTAGCTTGCTTAATAAGTTCCTTGTGAAATCTAATATCTT  
AAGTATCAGGCGCGCAAGGAGTACTGTTAAGCTAGAGACTGGAAGACGTAGGAAGTACGT  
TCAAAGTAGTGGTAAATACGTTAATCTTGGACGGACTCACAAACAGCGAAGGCATCCTAC  
GAGGACAGTTCTGACAGTGAGGGATGAAGGCTAGGGTCGCGAAACAGATTAGAAAACCTA  
GTAGTCC

>Otu2753

CCAGCCTACGGGTCGCTGCAGTGGGGAATTTTTCGCAATGGGGGAAACCTGACGCAGCA  
ACGCCGCGTGAGGATGAAGTCCTTCGGGACGTAAACTCCTTTTCGATCGGGACGATTATG



ACGGTACCGGAAGAAGAAGCCCCGGCTAACTTCGTGCCAGCAGCCGCGGTAATACGAGGG  
GGGCGAGCGTTGTTTCGGAATTATTGGGCGTAAAGGGTGCGTAGGCGGTTTGGTAAGTCTT  
GTGTGAAATCTCCGGGCTCAACTCGGAGCCTGCACGAGAACTGCCGGGCTTGAGTGTGG  
GAGAGGTGAGTGGAATTTCCGGTGTAGCGGTGAAATGCGTAGATATCGGAAGGAACACCT  
GTGGTGTAAACGGCTTTCTGGACCATAACTGACGCTGAGGCACGAAAGCGTGGGTAGCAA  
ACAGGATTAGAGACCCTAGTAGTCC

>Otu2754

CCAGCCTACGGGGGGCTGCAGTGGGGAATCCTGCGCAATGGGCGAAAGCCTGACGCAGCA  
ACGCCGCGTGGGGGATGAAGGCCTTCGGGTGTAAACCCCTTTCAGTGGGAACGAAATTG  
ACGGTACCCACAGAAGACGCCCCGGCCAACTACGCGCCAGCAGCCGCGGTGATACGTAGG  
GGGCGAGCGTTGTCCGGATTTATTGGGCGTAAAGAGCTCGTAGGCGGTTTCGGTAAGTCGG  
GTGTGAAACCTCCAGGCTCAACCTGGAGACGCCACTCGATACTGCCATGACTAGAGTCCG  
GTAGGGGATCACGGAATTCCTGGTGTAGCGGTGAAATGCGCAGATATCAGGAGGAGCACC  
AGTGGCGAAGGCGGTGATCTGGGCCGGAACGACGCTGAGGAGCGAAAGCGTGGGGAGCG  
AACAGGATTAGAAACCCTCGTAGTCC

>Otu2755

CCAGCCTACGGGGTGCACCAGTGGGGAATATTGCGCAATGGGCGGAAGCCTGACGCAGCG  
ACGCCGCGTGCGGGATGAAGGCCTTCGGGTGTAAACCGCTTTCAGCAGGGACGAATTCA  
GACGGTACCTGCAGAAGAAGCGCCGGCTAACTACGTGCCAGCAGCCGCGGTAAATACGTAG  
GGCGCAAGCGTTGTCCGGAATTATTGGGCGTAAAGAGCTCGTAGGCGGCCTGTTGCGTCC  
GCTGTGAAATCCCGGGGCTCAACCCCGGGCGTGCAGTGGATACGGGCAGGCTAGAGGCAG  
GCAGGGGAGAACGGAATTCCTGGTGTAGCGGTGAAATGCGCAGATATCAGGAGGAACACC  
GGTGGCGAAGGCGTTCTCTGGGCCTGTTCTGACGCTGAGGAGCGAAAGCGTGGGGAGCA  
AACAGGATTAGAAACCCGAGTAGTCC

>Otu2759

CCAGCCTATGGGTTGCACCAGTAGGGAATTTTCCACAATGGGCGAAAGCCTGATGGAGCA  
ACGCCGCGTGCAGGATGAAGGCCTTTCGGGTGCTAAACTGCTTTTATATGTGAAGATTATG  
ACGGTAGCATATGAATAAGGATCGGCTAACTCCGTGCCAGCAGCCGCGGTACATACGGAGG  
ATCCAAGCGTTATCCGGAATTACTGGGCGTAAAGAGTTGCGTAGGTGGCAAAGTAAGTTG  
GTAGTGAAAGCGTACGGCTCAACCGTATATCCATTACCAAACTGCTTAGCTAGAGAGCG  
AGAGAGGTACCTGGAATTCCTAGTGTAGGAGTGAAATCCGTAGATATTAGGAGGAACACC  
GGTGGCGTAGGCAGGGTACTGGCTCGTTTCTGACACTAAGGCACGAAAGCGTGGGGAGCA  
ACCCGGATTAGAGACCCTTGTAGTCC

>Otu2760

CCAGCCTATGGGGGGCAGCAGTGGGGAATATTGGGCAATGCGCAACCGCGTGACCCAGTG  
ATATTTTTCGAGTGAGAAACGGACAGCAATATCGCTGTAAAGCTCTTTTATCAAGGAAGA  
TAATGACAGTACTTGAAGAATCAGCACTGGCTAATTCTGTGCCAGCAGCCGCGGTAACAC  
AGGGAGTGCAGATGTTATTCATCATTATTGGGTGTAAAGGATATGTAGATTGTTTAGGTT  
TGGATATTTTGTAAAATTCTCGGGTAAATTCCTTAGATCGACAAAAGTTACCCAAAACT  
TAGAGTTTAAAAATAGGTTGATAGAATTTCTTGTGTAAAGGTAGAATCTCTATATATTAGA  
ACGACTTCTTAAAAAGTTGCGAAGGCAATTTTCTTGTTTAACTGACATTGAGATATGAA  
AGTATAGGGATCAAATAGGATTAGAAACCCGCGTAGTCC

>Otu2763

CCAGCCTATGGGGGGCTGCAGTCGAGAATCTTCCGCAATGGGGGCAACCCTGACGGAGCG  
ACGCCGCGTGGAGGATGACGTACTTCGGTATGTAAACTCCTTTTATTGGGGAGAAAGTTA  
TTGATAGTACCCGATGAATAAGAAGTTGCTAAACTCGTGCCAGCAGCAGCGGTAATACGA  
GTGCTTCAAGCGTTATCCGGAATTATTGGGCGTAAAGGTGTGTAGGCGGTCGTGTTAGT  
CTCTCGTTAAAGACTTCGGCTTAACCGGGGTCTGTGAGGGAAACGGCACGACTAGAGGA  
TGCGAGAGGTGAATGGAATCATAGTGTAGGGGTGAAATCCGTTGATATTATGGGGAACA  
CCAAAAGCGAAGGCAATTCCTGCGCACTCCTGACGCTGAAACACGAAAGCGTGGGTAG  
CGAATGGGATTAGAAACCCTCGTAGTCC

>Otu2765

CCAGCCTATGGGGCGCAGCAGTGGGGAATTTTGGACAATGGGCGAAAGCCTGATCCAGCA  
ACTCTGCGTGAGGGACGAAGATCTTAGGATTGTAAACCTCTTTTGCACGGGACGAAACCC  
CGCAAGGGACTGACGGTACCGTGCGAATAAGCCACGGCTAACTATGTGCCAGCAGCCGCG  
GTAAGACATAGGTGGCGAGCGTTATTCGGAATTACTAGGCGTAAAGCGAGTGTAGGCGGG  
CGCTTAAGTCCGACGTTAAATCTCCCGGCTTAACTGGGAAACGTCGTTCGGATACTGGGCG  
TCTCGAGTAGGGTAGGGGGCAGCGGAATTCGCGGTGTAGCGGTGAAATGCGTAGATATCG

GGAGGAACACCTATGGCGAAAAGCAGCTGCCTGGGCCTTTACTGACGCTAAGACTCGAAAG  
CTGGGGGAGCAAACAGGATTAGATACCCCTGTAGTCC

>Otu2768

CCAGCCTATGGGGGGCAGCAGTCGAGAATTTTTCTCAATGGGCGAAAGCCTGAAGGAGCG  
ACGCCGCGTGGGGGATGAATGGCTTCGGCCCGTAAACCCCTGTCATTTGTGAACAAATTG  
CTTACCCAAACACGTGAAGCATTGATAGTAACGGAAGAGGAAGGGACGGCTAACTCTGTG  
CCAGCAGCCGCGGTAATACAGAGGTCCCAAGCGTTGTTTCGGATTCACTGGGCGTAAAGGG  
TGCGCAGGTGGCTGGGTAAGTTTGACGTGAAATCTCCGGGCTCAACCCGGAAAATGCGTT  
GAATACTATCTGGCTGGAGGGTTGGAGGGGAGACTGGAATTCTCGGTGTAGCAGTGAAAT  
GCGTAGATATCGAGAGGAACACCAGTGGCGAAGGCGAGTCTCTGGACAACCTCTGACACT  
GAGGCACGAAAGCTAGGGGAGCAAACAGGATTAGAAACCCCTGTAGTCC

>Otu2772

CCAGCCTACGGGGGGGCTGCAGTGGGGAATATTGCGCAATGGGGGAAACCCTGACGCAGCA  
ACGCCGCGTGAGTGAGGAAGGCCTTCGGGTTGTAAAGCTCTTTCGGCTGGGAAGAAGTGA  
ACTATTTTTTAATAAAGATAGTTTGTGATGGTACCAGAAGAAGAAGCACCGGCAAACTTCG  
TGCCAGCAGCCGCGGTAATACGAAGGGTGCAAGCGTTATTCGGAATTATTGGGCGTAAAG  
GGTTCGTAGGCGGGAGAGCAAGTCAAGTGTGAAATTTCTAGGCTAAACCTAGAGAGTGCA  
TTTGAAACTGCTTTTCTTGAGTGTTAGAGAGGGTGATGGAATTGCTGGTGTAGGAGTGAC  
ATCCGTAGAGATCAGCAGGAACATCGGAGGCGAAGGCGGTCACCTGGCTAAATACTGACG  
CTGAGGAACGAAAGCATGGGGAGCAAACAGGATTAGATACCCCTCGTAGTCC

>Otu2776

CCAGCCTACGGGTTCGCAGCAGTAGGGAATATTGGGCAATGGTCGATAGACTGACCCAGCC  
ATGCCGCGTGAGGAAGAAGTATTTATGATATGTAACTGCTTTAGCAGGGGAAGAAAAA  
GGCCATGCGTGGCTCATTGACGGTACCCTGAGAATAAGCACCGGCTAACTCCGTGCCAGC  
AGCCGCGGTAATACGGGGGGTGCAAGCGTTGTCCGATTATTGGGTTTAAAGGGTGCGC  
AGGCGGCTCTGTAAGTCAGTGTTAAAAGTCATCAGCTTAACTGGTGTATGGCAATGATA  
CTGCAGAGCTTGAGTACAGATGAGGCAGGCGGAATTTATGGTGTAGCGGTGAAATGCATA  
GATACCATAAAGAACACCGATAGCGAAGGCAGCTTGCCGCGTTGTAACCTGACGCTCATGC  
ACGAAAGCGTGGGGATCAAACAGGATTAGAAACCCGTGTAGTCC

>Otu2778

CCAGCCTATGGGTGGCAGCAGTGGGGAATTTTGCAGCAATGGGGGAAACCCTGACGCAGCA  
ACGCCGCGTGAGGATGAAGTACTTCGGTACGTAAACTCCTTTTCGATCGGGACGATTATG  
ACGGTACCGGAAGAAAAAGCACCGGCTAACTCTGTGCCAGCAGCCGCGGTAATACAGAGG  
GTGCGAGCGTTAATCGGATTCACTGGGCGTAAAGGGTGCGTAGGCGGTCGGGTAAGTCTG  
ACGTGAAATCTCCGGGCCTAACCCGGAAGTGCCTCGGATACTATCCGGCTAGAGGATTG  
GAAGGGAGACTGGAATACTTGGTGTAGCAGTGAAATGCGTAGATATCAAGTGGAACACCA  
GTGGCGAAGGCGAGTCTCTGGACAATTCTGACGCTGAGGCACGAAAGCCAGGGGAGCAA  
ACGGGATTAGAAACCCCTCGTAGTCC

>Otu2779

CCAGCCTATGGGTTGCAGCAGTGAGGAATCTTGCAGCAATGGGCGAAAGCCTGACGCAGCG  
ACGCCGCGTGAGGATGAAGGTCTTAGGATTGTAAACTTCTGTAAAGCGGGAAGAAATGA  
TTTCGTTATAATACAGCGAATTTCCGACGGTACCGCTAGAGAAAGCACCGGCTAAACTCGT  
GCCAGCAGCCGCGGTAATACGAGTGGTGCAAGCGTTATTTCGGATTTATTGGGCGTAAAGG  
GTGTGTAGACGGCTTGTTAAGTCATTTGTTTAATCCTCCGGCCTAACCGGAGTACAGCAG  
GTGAAACTGGCGAACTTGAGGGTGGAAGAGAGAAGTGGAATTCTCGGAGTAGCGGTAAAA  
TGCGTAGATCTCGAGAGGAACACCAATGGCGAAGGCAGCTTCTTGGTCCATACCTGACGT  
TGAAACACGAAAGCGTGGGGAGCAAACAGGATTAGAGACCCCGTAGTCC

>Otu2782

CCAGCCTATGGGTTGCACCAGTGGGGAATATTGGACAATGGGGGAAACCCTGATCCAGCA  
ATGCCGCGTGGGTGAAGAAGGCCTTCGGGTTGTAAAGCCCTTTAGGCGGGGAAGAAGGTT  
TTAGGGTGATAAGCCCTAGAATTTGACGGTACCCGCAGAATAAGCACCGGCTAACTCTGT  
GCCAGCAGCCGCGGTAATACAGAGGGTGCGAGCGTTAATCGGATTTACTGGGCGTAAAGG  
GCGCGTAGGTGGTAAAGCAAGTAAGATGTGAAAGCCCCGGGTTTAACTGGGAAGTGCGT  
CTTAAACTGCTTAACTAGAGTATGGTAGAGGGTAGTGGAATTTCCGGTGTAGCGGTGAAA  
TGCGTAGAGATCGGAAGGAACGCCAGTGGTGAAGACGACTACCTGGACCAATACTGACAC  
TGAGGCGCGAAAGCGTGGGGATCAAACAGGATTAGATACCCCTGTAGTCC

>Otu2784

CCAGCCTATGGGTTGCTGCAGTCGAGAATTTTTCTCAATGGGTGAAAGCCTGAAGGAGCG

ACGCCGCGTGGGGGATGAATGGCTTCGGCCCGTAAACCCCTGTCATTTGCGAACAAATTG  
ACTCACTTAACACGTGTGTCAATTGATTGTAGTAGAAGAGGAAGGGACGGCTAACTCTGTG  
CCAGCAGCCGCGGTAATACAGAGGTCCCAAGCGTTGTTTCGGATTCACTGGGCGTAAAGGG  
TGCGTAGGCGGTTGAATAAGTCTGATGTGAAATCTCCGGGCTTAACCCGAAATTGCATC  
GGATACTATCCGACTAGAGGAATGGAGGGGAGACTGGAATACTTGGTGTAGCAGTGAAAT  
GCGTAGATATCGTGAGGAAGGCCAGTGGCGAAGGCGGATCTCTGGACAGTTCCTGACGCT  
GAGGCACGAAGGCCAGGGGAGCAAACGGGATTAGAAACCCTCGTAGTCC

>Otu2785

CCAGCCTACGGGATGCAGCAGTAGGGAATATTGCTCAATGGGGGAAACCCTGAAGCAGCA  
ACGCCGCGTGAGTGATGAAGGTTTTTCGGATTGTAAAGCTCTGTTGTGCGGGGAAAACGAT  
ATTATGGCTAACATCCATAGTAAGTGATTGTACCGCATAAGAAAGGACCGGCTAACTTCG  
TGCCAGCAGCCGCGGTAAGACGGGGGGTCTAGCGTTGTTTCGGAATTATTGGGCGTAAAG  
CGTGTGCAGGTTGTCTGAAAAGTTAGATGTGAAATCCTTGGGCTCAACCCAAGACGTGCA  
TTTAAAACTGTCAGACTTGAGTATGGAAGAGGGTTCGTGGAATTCCAGGTGTAGTGGTGAA  
ATACGTAGATATCTGGAGGAACACCGGCGGCGAAGGCGGCGACCTGGTCCAATACTGACA  
CTCATACGCGAAAGCGTGGGGATCAAACAGGATTAGAGACCCTCGTAGTCC

>Otu2786

CAGCCTATGGGTGGCAGCAGTGGGGAATATTGGACAATGGGCGAAAGCCTGATCCAGCAA  
TGCCGCGTGGGTGATGAAGGCCTTCGGGTTGTAAAGCCCTGTGCGCGGGAACGAAAAAAT  
CGATGTTGAATCGATCTTGACGGTACCCGCAAAGGAAGCACCGGCTAACTCTGTGCCAGC  
AGCCGCGGTAATACAGAGGGTGCAAGCGTTGTTTCGGAATTACTGGGCGTAAAGCGCATGT  
AGGCGGTCTAGTTAGTCAGATGTGAAAGCCCTGGGCTTAACCCAGGAACCGCATCTGATA  
CTGCTAAACTTGAGTGTGCGAGGGGATGGCGGAATTCCCGGTGTAGAGGTGAAATTCGTA  
GATATCGGGAGGAACACCTGTGGCGAAGGCGGCCATCTGGAAGACAACTGACGCTGAGAT  
GCGAAAGCGTGGGGAGCAGACAGGATTAGAAACCCTAGTAGTCC

>Otu2788

CCAGCCTACGGGATGCAGCAGTGGGGAATCTTGCGCAATGGACGAAAGTCTGACGCAGCG  
ACGCCGCGTGGGTGATGAAGGCCTTCGGGTTGTAAAGCCCTGTGGGGAGAGACGAATAAG  
TGTTGGCTAATACCCAGCATGATGACGGTATCTCCTTAGCAAGCACCGGCTAACTCTGTG  
CCAGCAGCCGCGGTAAGACAGAGGGTGCAAACGTTGTTTCGGAATTACTGGGCGTAAAGCG  
TGTGTAGGCGGCTCCGTAAGTCAGGTGTGAAAGCCCCAGGCTTAACCTGGGAAGTGCAC  
TGATACTGCGGAGCTTGAGTATCGGAGAGGTTGGTGAATTCTCGGTGTAGAGGTGAAAT  
TCGTAGATATCGAGAGGAACACCGGTGGCGAAGGCGGCCAACTGGACGAATACTGACGCT  
GAGACACGAAAGCGTGGGGAGCAAACAGGATTAGAAACCCTGTAGTCC

>Otu2789

CCAGCCTACGGGGGGCAGCAGTGGGGAATATTGGGCAATGCGTGAAAACGTGACCCAGTG  
ATATTTTTCGAGTGAGAAACGGACAGCGCTATCGCTGTAAAGCTCTTTTATCAAAGAAGA  
TAATGACAGTATTTGAAGAATCAGCACTGGCTAATTCTGTGCCAGCAGCCGCGGTAACAC  
AGGGAGTGAGATGTTATTCATCATTATTGGGTGTAAAGGATATGTAGGCTGTTTAGGTT  
TGGATATTTTGTAAAAGCCTTGGGTAAATTCCTTAGATAGACAAAAGTTACCCAAAACT  
TAGAGTTTAAAGTAGGTTATTAGAATTTCTTGTGTAAGGGTAGAATCTCTATATATTAGA  
ACGACTTCCTAAAAAGTTGCGAAAGCATTTTTCTTGTTTAAACTGACGCTGAGATATGAA  
AGTATAGGGATCAAATAGGATTAGAAACCCCGTAGTCC

>Otu2793

CCAGCCTACGGGGGGCTCCAGTCGAGGATCTTCGTCAATGGGCGAAAGCCTGAACGAGCG  
ATGCCGCGTGCGCGATGAAGGCCTTCGGGTTGTAAAGCGCGAAAGTGGAATAAAGGGAA  
ACTTGATTGAACCACAGTAAGCTCGGGCTAAGTTCGTGCCAGCAGCCGCGGTAAGACGAA  
CCGAGCGAACGTTGTTTCGGAATCACTGGGCATAAAGGGCGCGTAGGCGGGCTTCTAAGTC  
CGTGGTGAAATACTCTGGCTTAACCAGAGAACTGCCTCGGATACTGGGAGTCTCGAGTAA  
GGTAGGGGCACGTGGAACGGCTGGTGGAGCGGTGAAATGCGTTGATATCGGAAGGAACGC  
CGGTGGCGAAAGCGACGTGCTGGACCCTTTCTGACGCTGAGGCGCGAAAGCCAGGGGAGC  
AAACGGGATTAGAAACCCTAGTAGTCC

>Otu2796

CCAGCCTATGGGATGCACCAGCGGGGAATTTTGGACAATGGGGGCAACCCCGATCCAGCA  
ATGCCGCGTGAGTGAAGAAGGCCTTCGGGTTGTAAAGCTCTTTTGTGAGGGAAGAAACGG  
TGTCTCCTAATACGGGGCGCTAATGACGGTACCTGAAGAATAAGCACCGGCTAACTACGT  
GCCAGCAGCCGCGGTAATACGTAGGGTGCAAGCGTTAATCGGAATTACTGGGCGTAAAGC  
GTGCGCAGGCGGGTATGTAAGTCAGCTGTGAAATCCCCGGGCTTAACCTGGGAATGGCAG

TTGAGACTGCATGGCTAGAGTGTGTCAGAGGGGGGTAGAATTCCACGCGTAGCAGTGAAA  
TGCGTAGAGATGTGGAGGAATACCGATGGCGAAGGCAGCCCCCTGGGATAACACTGACGC  
TCATGCACGAAAGCGTGGGGAGCAAACAGGATTAGAAACCCCGGTAGTCC

>Otu2802

CCAGCCTACGGGAGGCACCCAGTGAGGAATATTGGTCAATGGACGCATGTCTGAACCAGCC  
ATGCCGCGTGAAGGATGAAGGCCTTCTGGGTGTAAACTTCTTTTATGAGGGAAGAAACC  
CCAATATTCTTATTGGGTGACGGTACCTTAGGAATAAGCACCGGCTAACTCCGTGCCAG  
CAGCCGCGGTAATACGGAGGGTGCAAGCGTTATCCGGATTCACTGGGTTTAAAGGGTGTG  
TAGGCGGGCCTGTAAGTCAGTGGTGAAATCTCCGGGCTCAACCCGAAACTGCCATTGAT  
ACTATAGGTCTTGAATTTTGTGAGGTTGGCGGAATAAGTCATGTAGCGGTGAAATGCAT  
AGATATGACTTAGAACACCGATTGCGAAGGCAGCTAACTAAGCAAACATTGACGCTGAGG  
CACGAAAGCGTGGGGATCAAACAGGATTAGAAACCCTCGTAGTCC

>Otu2803

CCAGCCTACGGGGGGGCTGCAGTAGGGAATATTGCGCAATGGAGGAAACTCTGACGCAGCG  
ACGCCGCGTGGGTGATGAAGGCCTTCGGGTCGTAAAGCCCTGTCGGAAGGGAAGAATGAC  
AAAATGGCTAACATCCATTTTGGTTGACGGTACCTTTAAAGGAAGCACCGGCTAACTACG  
TGCCAGCAGCCGCGGTAATACGTAGGGTGCAAGCGTTGTTTCGGAATCATTGGGCGTAAAG  
CGCATGTAGGTGGTTAGGTAAGTCGGGTGTGAAATCCCTGGGCTCAACCGAGGAAGTGCA  
TTCGAAACTACCTAGCTAGAGGACGGTAGAGGAAGGTGGAATTCCTAGTGTAGAGGTGAA  
ATTCGTAGATATTAGGAGGAATACCTGTGGCGAAGGCGGCCCTTCTGGGCCGTTCTTGACA  
CTGAGATGCGAAAGCGTGGGTAGCAAACAGGATTAGATACCCGAGTAGTCC

>Otu2810

CCAGCCTATGGGGGGGCTGCAGTGGGGAATTTTACGCAATGGGCGAAAGCCTGACGTAGCG  
ACACCGCGTGAACGAAGAAGCCCTTTGGGGTGTAAGTTCTGTTCGGCTGGAACGAAAATA  
AATATGACGGTACCAGCAGAGGAAGCATCGGCTAACTACGTGCCAGCAGCCGCGGTAAGA  
CGTAGGATGCAAGCGTTGTCCGGATTCAATTGGGCGTAAAGGGTTCGTAGGCGGTTTGTTA  
AGTCTGGTGTTAAAGGCCCGGGCCCAACCCGGGTATCGCACTGGATACTGGCAGACTGGA  
GTGCAGTAGAGGCGAGTGGAATTCCCAGTGTAGCGGTGAAATGCGTAGATATTGGGAAGA  
ACACCGGTGGCGCAGGCGACTCGCTGGGCTGTAAGTACGCTGAGGAACGAAAGCTAGGG  
GAGCAAATGGGATTAGATACCCCGGTAGTCC

>Otu2811

CCAGCCTACGGGGGGGCACCAGTAAGGAATATTGGTCAATGGGCGGAAGCCTGAACCAGCC  
ATGCCGCGTGCAGGAAGACGGCCCTACGGGTGTAAACTGCTTTTGCAGGGGAATAAACC  
CCCGTATGTATACGGGGTTGAATGTACTCTGAGAATAAGGATCGGCTAACTCCGTGCCAG  
CAGCCGCGGTAATACGGAGGATCCGAGCGTTATCCGGATTTATTGGGTTTAAAGGGTGCG  
TAGGCGGACTTATAAGTCAGTGGTGAAATCTCGTCGCTTAACGACGAACGTGCCATTGAT  
ACTGTAGGTCTTGAGTACAGATGCCGTTGGCGGAATGTGTCATGTAGCGGTGAAATGCAT  
AGATATGACACAGAACACCGATTGCGAAGGCAGCTGACGAAACTGTAAGTACGCTGAGG  
CACGAAAGCGTGGGGATCAAACAGGATTAGAAACCCTAGTAGTCC

>Otu2812

CCAGCCTACGGGAGGCAGCAGTGAGGAATATTGGTCAATGGGCGCAAGCCTGAACCAGCC  
ATGCCGCGTGAAGGATGAAGGCCTTCTGGGTGTAAACTTCTTTTACAGGGGAAGAAAAG  
TATTGTTTCTACGATATCCGACGGTACCCTGGGAATAAGCACCGGCTAACTCCGTGCCAG  
CAGCCGCGGTAATACGGAGGGTGCAAGCGTTATCCGGATTTACTGGGTTTAAAGGGTGTG  
TAGGCGGGCATTTAAGTCAGTGGTGAAATCTCCGAGCTCAACTTGGAAGTGGCATTGAT  
ACTATTTGTCTTGAATTCTGTGAGGTGGGCGGAATAAGTCATGTAGCGGTGAAATGCAT  
AGATATGACTTAGAACCCCAATTGCGAAGGCAGCTCACTAAACAGACATTGACGCTGAGG  
CACGAAAGCGTGGGGATCAAACAGGATTAGATACCCCGTAGTCA

>Otu2813

CCAGCCTACGGGTGTCACCAGTAGGGAATTTTCCACAATGGGCGAAAGCCTGATGGAGCA  
ACGCCGCGTGCAGGATGAAGGCCTTCGGGTGTAAACTGCTTTTATCTGTGACGAATATG  
ACGGTAGCAGATGAATAAGGATCGGCTAACTCCGTGCCAGCAGCCGCGGTCATACGGAGG  
ATCCAAGCGTTATCCGGAATTACTGGGCGTAAAGAGTTGCGTAGGTGGCAAAGTAAGCGG  
ACAGTGAAATAGTGTGGCTCAACCATAACAACATTGTCTGAACTGCTTAGCTTGAGGACG  
AGAGAGGTAGATGGAATTCCCAGTGTAGGAGTGAAATCCGTAGATATTGGGAGGAACACC  
GATGGCGTAGGCAGTCTACTGGCTCGTTCTTGACACTAAGGCACGAAAGCGTGGGGAGCA  
AACGGGATTAGAAACCCGAGTAGTCC

>Otu2815

CCAGCCTACGGGACGCACCAGTCGAGAATTTTTCACAATGGGGGAAACCCTGATGGAGCG  
ACGCCGCGTGGGGGATGAATGGCTTCGGCCCGTAAACCCCTGTCATTTGCGAACAAACGT  
TTTCGTTGAACAGGCGAAAACCTTGATTGTAGCGGAAGAGGAAGGGACGGCTAACTCTGTG  
CCAGCAGCCGCGGTAATACAGAGGTCCCAAGCGTTGTTTCGATTCACTGGGCGTAAAGGG  
TGCGTAGGTGGTCAGATAAGTCTGATGTGAAATCTCGGAGCTTAACTCCGAAACTGCATT  
GGAAACTAGTTGGCTGGAGGGTCGGAGGGGGGACTGGAATTCTCGGTGTAGCAGTGAAT  
GCGTAGATATCGAGAGGAACACCAGTGGCGAAGGCGAGTCCCTGGACGACTCCTGACACT  
GAGGCACGAAAGCTAGGGGAGCAAACAGGATTAGATACCCTAGTAGTCC

>Otu2816

CCAGCCTATGGGTGCTCCAGTGGGGAATATTGGACAATGAGGGAAACCCTGATCCAGCA  
ATGCCGCGTGTGTGAAGAAGGCCTTCGGGTGTAAAGCACTTTTGTGCGAGGAGGAAGGCG  
TGAAGGAATTCACGATTGACTTAACTCGAAGAAACAGCACCGGCTAACTCTGTGCCAGCA  
GCCGCGGTAATACAGAGGGTGCAAGCGTTAATCGGAATTATTGGGCGTAAAGCGCACGTA  
GGCGGTTTCGATAAGTTAGATGTGAAATACCTGGGCTTAACTTGGGGATGTCATCTAAAC  
TGTGGGACTAGAGTAGAGTAGAGGAAGGGGGAATTTCCGGTGTAGCGGTGAAATGCGTAG  
ATATCGGAAGGAACATCAGTGGCGAAGGCGCCCTTCTGGACAAATACTGACGCTGAGGAG  
CGAAAGCGTGGGGAGCAAACAGGATTAGATACTCTTGTAGTCC

>Otu2817

CCAGCCTATGGGTGGCTCCAGTCAAGAACTTTGGCAATGCACGAAAGTGTGACCAAGCG  
ACGCCGCGTGATTGATGAAGCCCTTCGGGTGTAAAGATCTTTTATGCATGAGAAAATTA  
TTGATGTTAGTGCATGAATAAGGGGCTCCTAACTCTGTGCCAGCAGGAGCGGTAATACAG  
AGGCCCCGAGCGTTATCCGGAATTATTGGGCGTAAAGGGTGCGTAGGTGGTTTTGTAGT  
CGAATGTCAAAAATCTGGGCTCAACCCAGGGGAGGCATTCGAAACGGCAAGACTCGAGTA  
TGTGAGAGGTGAACGGAACCTCATGGAGTAGGGGTGAAATCCGCTGATATCATGGGGGACA  
CCAAATGCGAAGGCAGTTCCTGGCACATTACTGACACTCAAGCACGAAAGCGTGGGTAG  
CGAATGGGATTAGATACCCCGGTAGTCC

>Otu2818

CCAGCTATGGTTGCTGCAGTCGAGAATTTTTCACAATGGACGAAAGTCTGATGGAGCGAC  
GCCGCGTGGAGGATGAAGGTTTTTCGGATTGTAAACTCCTGTCAGTGCAGAACAAAGCCAT  
GCGATTGAACATTTTCGCATGGTTGATGGTATGCGGAGAGGAAGGGACGGCTAACTCTGTG  
CCAGCAGCCGCGGTAAGACAGAGGTCCCAGCGTTGTTTCGATTCAATTGGGCGTAAAGGG  
TGTGTAGGAGGCTGGGTAAGTCAGGTGTGAAATCTCACAGCTTAACTGTGAAACTGCGCT  
TGATACTGCTCGGCTAGAGGATCGGAGGGGGTAACGGAATTTATGGTGTAGCAGTGAAT  
GCGTAGATATCATAAGGAACACCGGTGGCGAAGGCGGTTACCTGGAAGATTCCTGACTCT  
GAAACACGAAAGCCAGGGGAGCAAACGGGATTAGAAACCCAGTAGTCC

>Otu2825

CCAGCCTATGGGAGGCAGCAGCCGAGGATCATTCGCAATGGGCGCAAGCCTGACGATGCG  
ACGCCGTGTGAGCGAAGAAGGCCTTCGGGTGTAAAGCTCTTTCGCTTGGGAACAAGAGA  
CGTTGGTGAACAATCAGCGAATTTGAGGGTACCAGGTAAAGAAGCACCGGCTAACTCCGT  
GCCAGCAGCTGCGGTAATACGGAGGGTGCAAGCATTAATCGGATTTATTGGGCGTATAGG  
GCGCGTAGGCGGGAAGGTAAGTCAGATGTGAAATCCCGGGGCTCAACCCCGGAACAGCAT  
TTGAAACTCCCTTTCTTGAGGATAGGCGGAGAAAACGGAATTCACATGTAGCGGTGAAA  
TGCGTAGATATGTGGAGGAACACCGGTGGCGAAGGCGGTTTTCTAGCTTATTCCTGACGC  
TGAGGCGCGAAAGCAAGGGGATCAAACAGGATTAGAAACCCTCGTAGTCC

>Otu2826

CCAGCCTATGGGTGGCTCCAGCCGAGAATATTTCGACAATGGGCGAAAGCCTGATCGAGCG  
ATACCGCGTGGTGGATGAAGCGCTTCGGCGCGTAAACACCTTTTATGAGGGAGGAAGTTA  
TTGACGTTACCTCATGAATAAGGGGCTCCTAACTCTGTGCCAGCAGGAGCGGTAATACAG  
AGGCCCCAAGCGTTACCCGGAATTACTGGGCGTAAAGAGTGCGTAGGTGGTCGTATTAGT  
CGCGCGTCAAAACCCAGGGCTCAACCCTGGATCCGCGCGCGAAACGGTACGACTCGAGGG  
CGTGAGAGGTCTGTGGAACCTAGGTGTAGGGGTGAAATCCGTTGATATCTAGGGGAACA  
CCGAAAGCGAAGGCAGCAGACTGGCGCGTTCTTGACACTCAAGCACGAAAGCGTGGGTAG  
CGAACGGGATTAGAAACCCTTGTAGTCC

>Otu2827

CCAGCCTACGGGGGGCAGCAGTCGAGAATTTTCTCAATGGGCGAAAGCCTGAAGGAGCG  
ACGCCGCGTGGGGGATGAAGGGCTTCGGCTCGTAAACCCCTGTCATTTGCGAACAAACCT  
TTCCGCTTAACCGGCGGAAAACCTGATGGTAGCGAAAGAGGAAGGGACGGCTAACTCTGTG  
CCAGCAGCCGCGGTAGTACAGAGGTCCCAAGCGTTGTTTCGATTCACTGGGCGTAAAGGG

TGCGCGGGTGGCGGGGTAAGTTTGTATGTGAAATCTCCGGGCTCAACCCGGAACGACATT  
GAATACTATCCGGCTCGAGGGTTGGAGGGGGGACTGGAATTCTCGGTGTAGCAGTGAAAT  
GCGTAGATATCGAGAGGAACACCAGCGGCGAAGGCGAGTCCCTGGACAACCTCTGACACT  
GAGGCACGAAAGCTAGGGGAGCAAACAGGATTAGAAACCCGTGTAGTCC

>Otu2834

CCAGCCTACGGGTGGCAGCAGTGGGGAATTTTGGACAATGGGGGCAACCCTGATCCAGCC  
ATGCCGCGTGTGTGAAGAAGGCCTTCGGGTGTAAAGCACTTTTGTCCGGAACGAAACGG  
CGGATGCGAATAACATCCGTTAATGACGGTACCGGAAGAATAAGCACCGGCTAACTTCGT  
GCCAGCAGCCGCGGTAATACGAAGGGTGCGAGCGTTGTTTCGGATTTATTGGGCGTAAAGA  
GCTCGTAGGCGGTTTCAGCAAGTCGGGTGTAAACCCCCAGGCTCAACCTGGGGCCGCCAC  
CCGAAACTGTTGTGACTAGAGTTTGGTAGGGGATCACGGAATTCCCGGTGTAGCGGTGGA  
ATGCGCAGATATCAGGAGGAACACCAGTAGCGAAGGCGGTGATCTGGGCCAATACTGACG  
CTGAGGAGCGAAAGCGTGGGGAGCGAACAGGATTAGAAACCCGAGTAGTCC

>Otu2836

CCAGCCTATGGGTTCGCAACCAGTCAGGAATACTGCGCAATGGAGGAAACTCTGACGCAGCG  
ACGCCGCGTGGGTGATGAAGGCCTTCGGGTTCGTAAAGCCCTGTCGGAGGGGAAGAAAAGC  
TCGCTGGCTAATATCCAGCGGGCCTTTGACGGTACCCTCAAAGGAAGCACCGGCTAACTC  
CGTGCCAGCAGCCGCGGTAAGACGGAGGGTGCAAGCGTTGTTTCGGATTGACTGGGCGTAA  
AGGGCGTGTAGGCGGTTGCCCAAGTCCGATGTGAAAGCCCGGGGCTTAGCCTCGGAAGTG  
CATCGGAAACTAGGCAGCTGGAGCGCGATAGAGGAGGGTAGAATTCTTGTTGTAGCGGTG  
AAATGCGTAGATATCAGGAGGAACACCAATGGCGAAGGCAGCTCGCTGGGACGGTACTGA  
CGCTGAGACGCGAAAGCGTGGGGAGCGAACAGGATTAGAGACCCTCGTAGTCC

>Otu2837

CCAGCCTACGGGAGGCAGCAGTGGGGGATATTGGACAATGGGCGCAAGCCTGATCCAGCA  
ATGCCGCGTGAATGATGAAGGCCTTCGGGTGTAAAGTTCTTTTCGACGGGGACGATGATG  
ACGGTACCCGTAGAAGAAGCCCCGGCTAACTTCGTGCCAGCAGCCGCGGTAATACGAAGG  
GGGCTAGCGTTGTTTCGGAATTACTGGGCGTAAAGCGCACGCAGGCGGCTCGTTAAATTAG  
AAGTGAAAGCCCTGGGCTCAACCCGGGAATAGCTTTTGAAGTGGCGAGCTAGAATTCGG  
GAGAGGGTAGTGGAATTCCAAAGTGTAGAGGTGAAATTCGTAGATATTTGGAAGAACACCG  
GTGGCGAAGGCGGCTACCTGGCCCGATATTGACGCTCATGTGCGAAAGCGTGGGGAGCAA  
ACAGGATTAGATACCCTTGTAGTCC

>Otu2838

CCAGCCTATGGGTGGCACCAGTCGAGGATTTTTTCACAATGGGGGCAACCCTGATGGAGCG  
ACGCCGCGTGGAGGATGAAGGTTTTTCGGATTGTAAACTCCTGTCACTGCAGAGCAAAGCT  
TGGCCGTTAATACCGGTTCAAGTCTGATAGTATGCAGGGAGGAAGGGACGGCTAACTCTG  
TGCCAGCAGCCGCGGTAATACAGAGGTCCCGAGCGTTGTTTCGGATTCACTGGGCGTAAAG  
GGTGTGTAGGAGGTTTGGTAAGTCAGGTGTGAAATCCCGCAGCTTAACTGCGGAACTGCA  
TTCGATACTGCCGAAGTACAGGATCGGAGGGGGAAGCGGAACTCTTGGTGTAGCGGTGAA  
ATGCGTAGATATCAAGAGGAACACCGGTGGCGAAGGCGGCTTCCTGGAAGATTCCTGACT  
CTGAAACACGAAAGCCAGGGGAGCGAATGGGATTAGAAACCCCGGTAGTCC

>Otu2842

CCAGCCTACGGGAGGCACCAGTGAGGAATTTTCCGCAATGGGCGAAAGCCTGACGGAGCG  
ACGCCGCGTGTGGGAAGAAGGCCTTCGGGTTCGTAAACCACTGTGGAAGGGGAAGATATTG  
ACGGTACCCTTGAGGAAGCCCCGGCTAACTACGTGCCAGCAGCCGCGGTAAGACGTAGG  
GGGCAAGCGTTGTCCGGAATTATTGGGCGTAAAGCGCTCGTAGGCGGATCTACAAGTCTG  
TGAAGAAAGACCCGGGCTCAACTCGGGGAACGGCATAGATACTGTTGATCTTGAGACGAT  
CAGAGGATGATGGAATTCCTGGTGTAGCGGTGAAATGCGTAGATATCGGGAGGAACACCA  
GTGGCGAAGGCGATCATCTGGGGTTGTTCTGACGCTGAGGAGCGAAAGCTAGGGGAGCAA  
ACGGGATTAGAGACCCGCGTAGTCC

>Otu2844

CCAGCCTATGGGTGGCTGCAGTGGGGAATCTTGCACAATGGGCGAAAGCCTGATGCAGCA  
ACGCCGCGTGAGTGAAGAAGGCCTTTGGGTGTAAAGCTCTTTTCGGTTGGGAAGAAGGGA  
ATATAGGCTAATACCTTATATTTTTGACGGTACCAGCATAAGAAGCACCGGCTAATTCG  
TGCCAGCAGCCGCGGTAATACGGGAGGTGCAAGCGTTGTTTCGGAGTGACTGGGCGTAAAG  
CGCACGTAGGTGGGCTTGTAAGTCCGATGTGAAATCCCCGGGCTTAACTGGGAACTGCA  
TCCGAAACTACAAGTCTTGAAATGCTTCAGAGGTTGGTAGAATTCCAGGTGTAGGAGTGAA  
ATCCGTAGAGATCTGGAGGAATACCGGAGGCGAAGGCGGCCAACTGGGAATGCATTGACA  
CTGAGGTGCGAAAGCGTGAGGAGCAAACAGGATTAGATACCCGAGTAGTCC

>Otu2845

CCGCTATGGGGTGCTCCAGTCGAGAATCTTTGGCAATGCACGAAAGTGTGACCAAGCGAC  
GCCGCGTGATTGATGAAGCCCTTCGGGGTGTAAGATCTTTTATGCATGAAAAATTATT  
GATTTTAGTGCATGAATAAGGGGCTCCTAACTCTGTGCCAGCAGGAGCGGTAATACAGAG  
GCCCCGAGCGTTATTCGGAATTATTGGGCGTAAAGGGTGCCTAGGTGGTTTTGTAGTCG  
ACTGTCAAAAATCAGGGCTCAACCCTGGGGAGGCAATCGAAACGGCAAGACTCGAGTAGG  
TGAGAGGTGTTTCGGAATCATGGAGGAGGGGTGAAATCCGTTGATATCATGGGGAACACC  
AAATGCGAAGGCAGCACACTGGCGCCTTACTGACACTCAAGCACGAAAGCGTAGGTAGCG  
AATGGGATTAGATACCCCTGTAGTCC

>Otu2847

CCAGCCTATGGGTTGCACCAGTTAAGAATAATGGCCAATGCGCGAAAGCGTGAGCCTGCG  
ATCTGTCAGCGGTGATGAAGGAGATTTCTGTAAAACCGAAAAGGGAAGCTCCATATCGAG  
GACTTCCTGATCAGTCGTGATAAATCCTTGTCACACAGTCGCGGTCATACAAGAGCGGC  
GAATGTTGCATGATAGAATTTCGGTGTAAGGGCATGTAGGCGGCAGTCGTCACCTCTCATC  
ATCCAGAGTGACATAAGGACGGAATTTAAACGATGAGACGACCTCTCTAAAGGGATTCCCT  
ATCCGACTGCTTTGAGAGAATAAGAGGAGAATGGAATGGCCAGTGTACCAATGAAATCGG  
TTGATCCTGGCTGGAACATCCATGGCGAAGGCAATTCTCTGGTATTCATCTGACGCTGAG  
GTGCGAAAGTATGGGGAGCGATCGGGATTAGAAACCCCCGTAGTCC

>Otu2848

CCAGCCTATGGGTCGCTGCAGTAGGGAATATTGGACAATGGAGGCAACTCTGATCCAGCC  
ATGCCGCGTGAATGATGAAGGCCTTAGGGTTGTAAAGTCTTTTAGTGGGGAAGATAATG  
ACGGTACCCACAGAAAAAGCCCCGGCTAACTCTGTGCCAGCAGCCGCGGTAATACAGAGG  
GGGCTAGCGTTGTTTCGGAATTACTGGGCGTAAAGGGCGCGTAGGCGGTCCGTTAAGTTAG  
AAGTGAAATCCCGGGGCTTAACCTCGGAATTGCTTTTAATACTGGCAGACTTGAGATCGG  
TAGGGGATAGTGGAATTCCTTAGTGTAGGAGTGAAATCCGTAGATATTAAGAGGAACACCA  
GTGGCGAAGGCGACTATCTGGACCGATTCTGACGCTGAGGCGCGAAAGTGTGGGGAGCAA  
ACAGGATTAGAGACCCGAGTAGTCC

>Otu2851

CCAGCCTATGGGGGGCACCAGTGGGGAATATTGCGCAATGGGGGAAACCCTGACGCAGCA  
ACGCCGCGTGTGTGAAGAAGGCCTGCGGGTTGTAAAGCACTTTTAGTGGGGACAAAAAGC  
CACGGACTAATACTCTGTGGTCTTGATTTAACCCAAAGAAAAAGCACCGGCTAACTCTGT  
GCCAGCAGCCGCGGTAATACAGAGGGTGCGAGCGTTAATCGGAATTACTGGGCGTAAAGC  
GTGCGTAGACGTTTTGTAAAGTCGGATGTGAAATCCCCGGGCTCAACCTGGGAATTGCAT  
TCGAAACTGCAAGGCTTGGGTGCGGAAGAGGGAAGCGGAATTTCCGGTGTAGCGGTGAAA  
TGCGTAGATATCGGAAGGAACATCAGTGGCGAAGGCGGCTTCCTGGTCCAGCACCGACGT  
TCAGGCACGAAAGCGTGGGGAGCAAACAGGATTAGATACCCCGGTAGTCC

>Otu2852

CCAGCCTATGGGTTGCTGCAGTCGAGAATTTTTCTCAATGGGGGAAACCCTGAAGGAGCG  
ACGCCGCGTGGAGGATGAAGGTCTTCGGATTGTAAACTCCTGTCATTAGGGAACAAGTTG  
CATGCGTTAACTGCGCATGCATTGATAGTACCTGAAGAGGAAGAGACGGCTAACTCTGTG  
CCAGCAGCCGCGGTAATACAGAGGTCTCAAGCGTTGTTTCGGATTCAATTGGGCGTAAAGGG  
TGCGTAGGTGGCGCCGTAAGTCAGGTGTGAAATCTCGGGGCTTAACCCGAAACTGCATT  
TGATACTGCGGTGCTCGAGTACTGGAGAGGAGATTGGAATTTACGGTGTAGCAGTGAAAT  
GCGTAGATATCGTAAGGAAGACCAGTGGCGAAGGCGAATCTCTGGACAGTTACTGACACT  
GAGGCACGAAGGCCAGGGGGGCAAACGGGATTAGAAACCCTCGTAGTCC

>Otu2854

CCAGCCTACGGGGGGCACCAGTAAGGAATATTGGACAATGGGCGCAAGCCTGATCCAGCC  
ATGCCGCGTGAAGGATGAAGGCCTTCGGGTGTAAAGGACTTTTGTTTCGGGAGGAAATCC  
CGCTGGTTAATACCTGGCGGGGATGACAGTACCGGAAGAATAAGCACCGGCTAACTACGT  
GCCAGCAGCCGCGGTAATACGTAGGGTGCAAGCGTTAATCGGAATTACTGGGCGTAAAGC  
GTGCGCAGGCGGTTTTGCAAGTCTGATGTGAAAGCCCCGGGCTCAACCTGGGAACGGCAT  
TGGAGACTGCAAGACTAGAGTGCGTCAGAGGGGGGTAGAATTCGCGGTGTAGCAGTGAAA  
TGCGTAGAGATGCGGAGGAATACCGATGGCGAAGGCAGCCCCCTGGGATGACACTGACGC  
TCATGCACGAAAGCGTGGGGAGCAAACGGGATTAGAGACCCCTGTAGTCC

>Otu2860

CCAGCCTATGGGATGCTCCAGTGGGGAATATTGGACAATGGGGGCAACCCTGATCCAGCA  
ATGCCGCGTGTGTGAAGAAGGCCTTAGGGTTGTAAAGCACTTTCAGTAGGGAGGAAGGGG  
TTAATGCTAATATCATTAATCATTTGACGTTACCTACAGAAGAAGCACCGGCTAACTCTGT

GCCAGCAGCCGCGGTAATACAGAGGGTGCAGAGCGTTAATCGGAATTACTGGGCGTAAAGC  
GTGTGTAGGTGGTTAGATAAGTTAGATGTGAAATCCCCGGGCTTAACCTGGGCATTGCGT  
TTAAGACTGTTTAACTAGAGTACTGTAGAGGATAGTGGAATTTCCAGTGTAGCGGTGAAA  
TGCGTAGATATTGGAAGGAACACCACTGGCGAAGGCGACTATCTGGACAGATACTGACAC  
TGAGACACGAAAGCGTGGGGAGCAAACAGGATTAGAGACCCGTGTAGTCC

>Otu2861

CCAGCCTACGGGAGGCAGCAGTAGGGAATATTGGACAATGGGGGAAACCCTGATCCAGCC  
ATGCCGCGTGAACGATGAAGGCCTTCGGGTGTAAAGTCTTTTGGTGGGGACGATGATG  
ACGGTACCCACAGAATAAGCACCGGCTAACTTCGTGCCAGCAGCCGCGGTAATACGAAGG  
GTGCTAGCGTTGTTTCGGAATTACTGGGCGTAAAGGGCGCGTAGGCGGTTTAAACAAGTTGG  
GTGTGAAAGCCCAGGGCTTAACCCTGGAAGTCACTCAAGACTGTTTTACTTGAATTCGG  
TAGAGGTTAGTGGAATTCAGTGTAGAGGTGAAATTCGTAGATATTGGGAAGAATATCC  
GTGGCGAAGGCGGCTAACTGGACTGACATTGACGCTGAGGCGCGAAAGCGTGGGGATCAA  
ACAGGATTAGATACCCTAGTAGTCG

>Otu2865

CCAGCCTATGGGGGGCTCCAGTGGGGAATATTGGACAATGGGGGGAACCCTGATCCAGCA  
ATGCCGCGTGTGTGAAGAAGGCCTGAGGGTTGTAAAGCACTTTCGTTAGGGAGGAGGGTG  
ATTAGGTTAAGAGCTAGATTACTGGACGTTACCTAAAGAAGAAGCACCGGCTAACTCCGT  
GCCAGCAGCCGCGGTAATACGGAGGGTGCAAGCGTTAATCGGAATTACTGGGCGTAAAGG  
GTGCGTATGTGTTGATTAAAGTTATCTGTGAAATACCTGGGCTTAACCTGGGCAGGTGAG  
ATGATACTGATTGACTCGAGTACGGGAGAGGGTAGTGGAATCTCCGGTGTAGCGGTGAAA  
TGCGTAGAGATCGGAAGGAACACCACTGGCGAAGGCGGCTACCTGGCCTAGTACTGACAC  
TGAGGCACGAAAGCGTGGGGAGCAAACAGGATTAGAAACCCCGTAGTCC

>Otu2866

CCAGCCTATGGGGTGCAGCAGTGGGGAATATTGGACAATGGGCGCAAGCCTGATCCAGCC  
ATGCCGCGTGAGTGATGAAGGCCTTCGGGTGCTAAAGCTCTGTGGGGAGGGACGAAAGGC  
CAAGGAGCTAATACCTCTTGTTGTTGACGGTACTTCCTTAGCAAGCACCGGCTAACTCCGT  
GCCAGCAGCCGCGGTAATACGGAGGGTGCAAACGTTGCTCGGAATCATTGGGCGTAAAGC  
GCACGTAGGCGGCTTGTTAAAGTCGGATGTGAAAGCCCCGGGCTCAACCCGGGAAGGGCAT  
TCGAAACTGGCGAGCTTGAGTATGGAAGAGGGTCTCGGAATTCCTCGGTGTAGAGGTGAAA  
TTCGTAGATATCGGGAGGAACACCACTGGCGAAGGCGGAGACCTGGGCCAATACTGACGC  
TGAGGTGCGAAAGCGTGGGGAGCAAACAGGATTAGAAACCCGAGTAGTCC

>Otu2867

CAGCCTACGGGAGGCAGCAGTGGGGAATTTTGGACAATGGGCGAAAGCTTGATCCAGCAA  
AATCGCGTGAGTGAGGAAGACTTTATGTGCTAAAGCTATTTTCGTTAAGGAAAATTGTGAT  
TTACTTAAAGAAGAAGTCCCGACTAACTTCGTGCCAGCAGTCGCGGTAAAACGGGGGGGG  
CAAGCGTTATTAGATTAAATTGGGCGTAAAGGGTATGTAGGTGGTTTATGGTATTAAAG  
TTAAAGATAAGGGCTTAACCTTTGAAAAGCTTTTGAATTAATAAGCTTGAGTATAAAGG  
GTGATAGTGGTATTTTTTGGTGGAGAGGTGAAATTCCTAGATATTAAAAAGACCAGCAGAG  
GCGAAGGCGACTATCAATTTTATTTACTGACGTTGAGGTACGAAAGCATGGGGAGCAAAC  
AGGATTAGAGACCCAGTAGTCC

>Otu2873

CCAGCCTATGGGGGGCAGCAGTCGAGGATCTTCGGCAATGGGCGCAAGCCTGACCGAGCG  
ACGCCGCGTGCGCGATGAAGGCCTTCGGGTGTAAAGCGCTGCCGAGGGGGAGGAAGCCG  
CAAGGTTGACCTATCCCTGGAGGAAGCACGGGCTAAGTTCGTGCCAGCAGCCGCGGTAAG  
ACGAACCGTGCGAACGTTGTTTCGGAATCACTGGGCTTAAAGGGCGCGTAGGCGGGTCATC  
CAGTCCGGGGTGAAATCTTTCGGCTTAACCGGAAAATAGCCTTGATACGGGTGGTCTAG  
AGGGAGGCAGGGGCAGCGGGAACCTCCGGTGGAGCGGTGAAATGCGTTGATATCGGAAGG  
AACGCCGGTGGCGAAAGCGCGCTGCTGGACCTTTTCTGACGCTGAGGCGCGAAAGCCAGG  
GGAGCAAACGGGATTAGATACCCCGTAGTCC

>Otu2874

CCAGCCTATGGGAGGCTCCAGTGGGGAATTTTGGACAATGGGCGCAAGCCTGATCCAGCA  
ATGCCGCGTGAGTGAAGAAGGCCCTTGGGTGTAAAGCTCTTTCGGTGGGAAGAAGGAG  
GAGTAGCTAATATCTACTCCGACAGACGGTACCGGCATAAGAAGCACCGGCTAACTACGT  
GCCAGCAGCCACGGTAATACGTAGGGTGCAAGCGTTAATCGGAATGACTGAGCGTAAAGG  
GTGTGTAGGCGGTTTTTTTAAAGTCTGATGTGAAAGCCCCGGGCTCAACCTGGGAACGGCAT  
TGGAAGTGGGAACTGGAGTACGTAAGAGGGGGGTGGAATTCACGTGTAGCAGTGAAA  
TGCGTAGAGATGTGGAGGAACACCGATGGCGAAGGCAACCCCTGGGACGATACTGACGC



TGAGGCACGAAAGCGTGGGGAGCAAACAGGATTAGAAAACCCAGTAGTCC

>Otu2875

CCAGCCTACGGGACGCTCCAGTAAAACCTGCACCGACAATCACCCAGTTGTAACGTGCCA  
TCGAAAGATATCCAGTACCGTTGGTGTGAGTATCAGTCGGCATCTTGTCTTCGGCT  
AAAAATTCAGGCTGACAATCAAAGAAAGTTCCGGCCCCAAAAGCCGGTAACAATGACCCTT  
AGTCGAAGGAATAATTTGTTCGGTTCTTCCTAAAGTCCTGCGGAGATCGTTTAGGACTCGA  
AGGATGAACGAAATTGTTTCGTTTGGAGAGTCAACCGAAATGTTTACGCTGAGTGTATAAG  
GTATTTTCGGTAAAAATAATAACAGTGCAATTCGCGCCCGCGATTCTTCTCTGTCAATT  
CGAAAGGAAACATTTCCGGTCTTCAGATGCGTAACGTGACTATTACCAATTAGAGACCTT  
CGTAGTCC

>Otu2881

CCAGCCTATGGGAGGCAGCAGTCGAGAATTTCTCACAATGGCGAAAGCCTGAAGGAGCGA  
CGCCGCGTGGGGGATGAATGGCTTCGGCCCCGTAAACCCCTGTCATTTGTGAACAAATTGC  
TTCACCCAACACGTGAAGCATTGATAGTAACGGAAGAGGAAGAGACGGCTAACTCTGTGC  
CAGCAGCCGCGGTAATACAGAGGTCTCAAGCGTTGTTTCGGATTTCATTGGGCGTAAAGGGT  
GCGTAGGCGGGGGTAAGTCAGGTGTGAAATCTCGGGGCACAACCTCCGAAACTGCACCTT  
GATACTGCCCTGCTTGAGTACTGGAGAGGAGATTGGAATTTACGGTGTAGCAGTGAAATG  
CGTAGATATCGTAAGGAAGACCAAGTGGCGAAGGCGAATCTCTGGACAGTTACTGACGCTG  
AGGCACGAAGGCCAGGGGAGCAAACGGGATTAGATACCCAGTAGTCC

>Otu2884

CCAGCCTATGGGGGGCAGCAGTGGGGAATTTTGTGCAATGGGCGAAAGCCTGACACAGCG  
ACACCGCGTGATGAAGAAGCCCTTTGGGGTGTAATAATCCTGTTCGGCTGGAACGAAAAAA  
ATGACGGTACCAGCAGAGGAAGCATCGGCTAACTACGTGCCAGCAGCCGCGGTAAGACGT  
AGGATGCGAGCGTTGTCCGGATTTATTGGGCGTAAAGAGTTCGTAGGCGGTTTGTAAAGT  
CTGATGTTAAAGATCGGGGCTCAACCCTGGGAGTGCATTGGATACTGGCAGACTGGAGTG  
TGGTAGAGGCTAGTGGAATTTCCAGTGTAGCGGTGAAATGCGTAGATATTGGGAAGAACA  
CCAGTGGCGTAGGCGACTAGCTGGGCCATAACTGACGCTGAGGAACGAGAGCCAGGGGAG  
CGAATGGGATTAGAAAACCCGAGTAGTCC

>Otu2886

CCAGCCTACGGGGGGCTGCAGTCGAGAATTTTTCTCAATGGGGGAAACCCTGAAGGAGCG  
ACGCCGCGTGAGGATGAAGTCTTCGGATTGTAAACTCCTGTTCATGAGGGAACAAACCC  
GCACGTTTAACTGATGTGCGGCTGATAGTACCTCAAGAGGAAGAGACGGCTAACTCTGTG  
CCAGCAGCCGCGGTAATACAGAGGTCTCAAGCGTTGTTTCGGATTTCATTGGGCGTAAAGGG  
TGCGTAGGCGGCGAAGCAAGTCAGATGTGAAATCCCGGGGCTTAACCCCGGAACTGCATT  
TGATACTGCTTTGCTTGAGGACTGGAGAGGAGATCGGAATTCACGGTGTAGCAGTGAAAT  
GCGTAGATATCGAGAGGAACACCAGTGGCGAAGGCGAGTCCCTGGACGACTCCTGACACT  
GAGGCACGAAAGCTAGGGGAGCAAACAGGATTAGAGACCCGAGTAGTCC

>Otu2887

CCAGCCTATGGGGTGCTGCAGTGGGGAATATTGGACAATGGGCGAAAGCCTGATCCAGCA  
ATGCCGCGTGTGTGAAGAAGGCCTTCGGGTTGTAAAGCACTTTTAGTGAGGAGGAAAGTT  
TCAAGGCTAATACCCTTGAAAATTGACGTTACTCACAGAAAAAGCACCGGCAAACCTCTGT  
GCCAGCAGCCGCGGTAATACAGAGGTGCGAGCGTTAATCGGAATTACTGGGCGTAAAGC  
GCACGTAGGCGGATATCTAAGTCGATTGTGAAATCCCCGGGCTCAACCTGGGAACTGCAT  
TCGATACTGGATATCTAGAGTATGGTAGAGGAAAGTGGAATTTCCCGGTGTAGCGGTGAAA  
TGCGTAGATATCGGGAGGAACACCAGTGGCGAAGGCGGCTTTCTGGATCAATACTGACGC  
TAAGGTGCGAAAGCGTGGGGAGCAAACAGGATTAGAAAACCCTAGTAGTCC

>Otu2891

CCAGCCTACGGGGTGCTGCAGCAGTGAGGAATATTGGTCAATGGACGCAAGTCTGAACCAGCC  
ATGCCGCGTGAAGGATGAAGGCCTTCTGGGTTGTAAACTCTTTTATCTGGGAAGAAACC  
ACCTTTTTCTAAGGTTGTTGACGGTACCAGAGGAGTAAGCACCGGCTAACTCCGTGCCAG  
CAGCCGCGGTAATACGGAGGGTGCAAGCGTTATCCGGATTCACTGGGTTTAAAGGGTGTG  
TAGGCGGGTATTTAAGTCAGTGGTGAAATCTCCGGGCTCAACCCGGAACCTGCCATTGAT  
ACTATATATCTTGAATACTGTTGAGGTAGGCGGAATATATCATGTAGCGGTGAAATGCAT  
AGATATGATATAGAACACCGATTGCGAAGGCAGCTTACTAAACAGTTATTGACGCTGAGG  
CACGAAAGCGTGGGGATCAAACAGGATTAGAAAACCCGCGTAGTCC

>Otu2897

CAGCCTATGGGTCGCTGCAGTGGGGAATCTTGGACAATGGGGGCAACCCCTGATCCAGCGA  
TGCCGCGTGGGTGAAGAAGGCCTTCGGGTTGTAAAGCCCTTTAGGCTGGGACGAAGTGTG

TGGGGGGATAATACTCATGCATTGACGGTACCAGCAGAAATAAGCACCGGCAAACCTCTGTG  
CCAGCAGCCGCGGTAATACAGAGGGTGCAAGCGTTAATCGGAATTACTGGGCGTAAAGGG  
CGCGTAGGCGGTTTATTGGGTGTGATGTGAAAGCCTTGGGCTTAACCTGAGAAGTGCATC  
GCGAACTAATAGACTTGAGTAGATGAGAGGGTGGCGGAATTTCCGGTGTAGCGGTGAAAT  
GCGTAGAGATCGGAAGGAACGTCAATGGCGAAGGCAGCCACCTGGCATCATACTGACGCT  
GAGGCGCGAAAGCGTGGGGAGCGAACAGGATTAGATACCCCCGTAGTCC

>Otu2902

CCAGCCTATGGGTGGCACCAGTAGGGAATATTGCACAATGGAGGAAACCTCTGATGCAGCG  
ACGCCGCGTGAGCGATGAAGGCCTTCGGGTGTAAAGCTCTGTCTGATGGGAATAAGCAA  
GTGAATGTACCATGCAAGAAAGGATCGGCTAACTTCGTGCCAGCAGCCGCGGTAAGACGA  
GGGATCCTAGCGTTGTTTCGGAATCATTGGGCGTAAAGCGGGTGCATGTGGCTCTGTAAAGT  
CAGGTGTGAAAGCCCAGGGCTTAACCCTGGAAGTGCATTTGATACTGCAGAGCTTGAGTG  
CTGGAGAGGCTATTAGAATTCCTGGTGTAGTGGTGAAATACGTAGATATCAGGAGGAATA  
CCGGAGGCGAAGGCGGATAGCTGGCCAGACACTGACACTCAGACCCGAAAGCGTGGGGAT  
CAAACAGGATTAGAGACCCTCGTAGTCC

>Otu2903

CCAGCCTATGGGACGCTGCAGTGGGGAATTTTGCACAATGGACGCAAGTCTGATGCAGCG  
ACGCCGCGTGAGTGAAGAAGGCCTTCGGGTGTAAAGCTCTGTCTGAATGGGACAAAGAGA  
TATCTGCAATAATACGGCAGGTAAGTGATGTTACCATTAGAGGAAGCACCGGCTAACTCC  
GTGCCAGCAGCCGCGGTAATACGGAGGGTGCAAGCGTTGTTTCGGAATTATTGGGCGTAA  
GGGCAGGTAGGTGGTCTCAAAAGTCTACTGTGAAATCCCCGAGCTTAACTTGGGAAGTGC  
GGTGGATACTCTGAGACTCGAGTACTGGATGGGTGCGTGGAATTCCTGGTGTAGCGGTGA  
AATGCGTAGAGATCGGGAGGAACACCAGAGGCGAAGGCGGCGACCTGGACAGGTACTGAC  
ACTCAACTACGAAAGCGTGGGGAGCAAACAGGATTAGAAACCCCCGTAGTCC

>Otu2906

CCAGCTATGGGTTCACACAGTCGAGAATCTTTTCGCAATGGGCGAAAGCCTGACGAAGCAA  
CGCTGTGTGTGTGATGAAGGCCTTCGGGTGTAAAGCACTTTCGCCTAAGAACAAGAGAG  
CGTTATTAATACCAACGCAATTTGAGAGTACTAGGTAAAGAAGCACCGGCTAACTACGTG  
CCAGCAGCTGCGGTAATACGTAGGGTGCAAGCATTAAATCGGATTTATTGGGCGTAAAGGG  
CGCGTAGGCGGAGGGGTAAGTCAGATGTGAAAGCCCGCAGCTCAACTGCGGAACAGCATT  
TGAAACTACCCCCCTAGAGGGTAGGCGGAGAAAACGGAATTCACAAAGTAGCGGTGAAAT  
GCGTAGATATGTGGAAGAACACCAGTGGCGAAGGCGGTTTCTAGCTTATACCTGACGCT  
GAGGCGCGAAAGCAAGGGGAGCAAACAGGATTAGAGACCCCAGTAGTCC

>Otu2908

CCAGCCTACGGGACGCTGCAGTGAGGAATATTGCACAATGGGCGAAAGCCTGATGCAGCG  
ACACCGCGTGAGGATGAAGGTCTTAGGATTGTAACTTCTGTTAAGCGGGAAGAAAAGT  
TTGTTGTTAATACCAACAAGAAATGACGGTACCGCTAGAGAAAGCACCGGCTAACTTCGT  
GCCAGCAGCCGCGGTAATACGAAGGGTGCAAGCGTTATTCGGATTGATTGGGCGTAAAGG  
GTGCGCAGACGGTAGGCTAAGTCCGTTAGTCAAATCCCTCAGCTTAACTGAGGAACAGCT  
GCGGATACTGGTGTGCTAGAGGGTGGGAGAGAGAAGTGGAATTCCTGGAGTAGCGGTAAA  
ATGCGTAGATCTCGGGAGGAACACCAATGGCGAAGGCAGCTTCTTGCCCCATTCTCTGACG  
TTGAGGCACGAAAGCGTGGGGAGCAAACAGGATTAGAAACCCTCGTAGTCC

>Otu2916

CCAGCCTATGGGTGGCAGCAGTGGGGAATCTTTCGCAATGGGCGAAAGCCTGACGCAGCG  
ACGCCGCGTGGGTGATGAAGGCCTTCGGGTGTAAAGCCCTGTGGGGAGGGAAGAATGAA  
CCAGGGTGAACAATCCTGGCGATGACGGTACCTCCTTAGCAAGCACCGGCTAACTCTGTG  
CCAGCAGCCGCGGTAATACAGAGGGTGCAAACGTTGTTTCGATTTACTGGCGTAAAGCGC  
GTGTAGGCGGTTTCCAAGTCGGACGTGAAAGCCCGGGGCTCAACCTCGGAAGTGCCTC  
GATACTGGGAGACTGGAGTCTCGGAGAGGATGGTGGAATCTCGGTGTAGAGGTGAAATT  
CGTAGATATCGAGAAGAACACCGGCGGCGAAGGCGGCCATCTGGACGAAGACTGACGCTG  
AGACGCGAAAGCGTGGGGAGCAAACAGGATTAGATACCCCTGTAGTCC

>Otu2920

CCAGCCTATGGGATGCAGCAGTGGGGAATATTGCACAATGGGCGAAAGCCTGATGCAGCG  
ACGCCGCGTGAGGGATGAAGGCCTTCGGGTGTAAACCTCTTTCAGCAGGGACCAAGCGC  
AAGTGAGTGTACCTGCAGAAGAAGCACCGGCTAACTACGTGCCAGCAGCCGCGGTAATAC  
GTAGGGTGCAGCGGTTGTCCGGATTTATTGGGCGTAAAGGGCTCGTAGGCGGCCTGTCTGC  
GTCGGAAGTGAAAGCCCCTGCTTAACGGTGGGTCTGCTTCCGGTACGGGCAGGCTGGAG  
TATGGCAGGGGAGACTGGAATTCCTGGTGTAGCGGTGGAATGCGCAGATATCAGGAGGAA

CACCGGTGGCGAAGGCGGGTCTCTGGGCCATTACTGACGCTGAGGAGCGAAAGCGTGGGG  
AGCGAGCAGGATTAGATACCCCTGGTAGTCC  
>Otu2921  
CCAGCCTACGGGGGGGCTCCAGCCGAGAATATTCGACAATGGGCGAAAGCCTGATCGAGCG  
ACGCCGCGTGATTGATGAAGTCTTTCGGGATGTAAAGATCTTTTATGGGGGAGAAAGCCA  
TGTTTGACATGGTTGATGGTACTCCATGAATAAGGGGTGCTAAACTCGTGCCAGCAGCA  
GCGTAATACGAGTGCCCCGAGCGTTATCCGGAATTATTGGGCGTAAAGGGTGTGTAGGT  
GGTTGTGTTAGTCTTTTGTAAAACTCTTGGCTTAACCAAGAAGGTGCGAAAGAAACGGC  
ACGACTAGAGAGTGCGAGAGGTGAGCGGAACCTCATGGTGTAGGGGTGAAATCCGTTAATA  
TCATGGGGAACACCAAAGGCGAAGGCAGCTCACTGGCGTACTTCTGACACTGAAACACGA  
AAGCGTGGGTAGCGAATGGGATTAGAAACCCCGGTAGTCC  
>Otu2923  
CCAGCCTACGGGATGCACCAGTGGGGAATTTTGCGCAATGGGGGAAACCCTGACGCAGCA  
ACGCCGCGTGAGGATGAAGCCCCTTGGGGCGTAAACTCCTTTTCGATCGGGAAGATAATG  
ACGGTACCGGAAGAAGAAGCCCCGGCTAACTTCGTGCCAGCAGCCGCGGTAATACGAGGG  
GGGCGAGCGTTGTTTCGGAATTATTGGGCGTAAAGGGCGCGTAGGCGGTTGGACAAGTCTT  
GTGTGAAATCTTCAGGCTCAACCTGAAGTCTGCATAGGAAACTGTCCGGATTGAGTGTGG  
GAGAGGTGCGTGGAATTCCCGGTGTAGCGGTGAAATGCGTAGATATCGGGAGGAACACCT  
GTGGCGAAAGCGGCGCACTGGACCACAACCTGACGCTGAGGCGCGAAAGCTAGGGGAGCAA  
ACAGGATTAGATACCCCTTGTAGTCC  
>Otu2924  
CCAGCCTATGGGTGGCACCAGTCAAGAACTTTCCACAATGGACGCAAGTCTGATGGAGCG  
ACGCCGCGTGATTGATGAAGTCTTTCGGGACGTAAAGATCTTTTATGAGGGAAGAAGTTT  
ATTGACGGTACCTCATGAATAAGGGGCTCCTAATCTCGTGCCAGCAGGAGCGGTAATACG  
AGAGCCCCGAGCGTTATCCGGAATTATTGGGCGTAAAGGGTGCCTAGGTGGTTTTGTAG  
TCGTTTGTCAAAATCCAGAGCTTAACTTTGGACCCGCAAACGAAACGGCAAGACTAGAGG  
ATGTGAGAGGTATAGGGAACCTCATGGTGTAGGGGTGAAATCCGTTGATATCATGGGGAAC  
ACCGAAAGCGAAGGCACTATACTGGCACACTCCTGACACTCAAGCACGAAAGCGTGGGTA  
GCGAGTGGGATTAGATACCCCGCGTAGTCC  
>Otu2931  
CCAGCCTATGGGGGGCAGCAGTCGAGAATTTTTCTCAATGGGGGAAACCCTGAAGGAGCG  
ACGCCGCGTGAGGATGAAGGTCTTCGGATTGTAAACTCCTGTCAATTTGAGAACAAGGGG  
TTGGGGAGTCACTGCCCTGATCATTGATAGTATCAGAAGAGGAAGAGACGGCTAACTCTG  
TGCCAGCAGCCGCGGTAATACAGAGGTCTCAAGCGTTGTTTCGGATTCAATGGGCGTAAAG  
GGTGCCTAGGCGGTTCCGTAAGTCGGATGTGAAATCTTGGGGCTCAACCCCAAACGGCA  
TTCGATACTGCGGAGCTAGAGGACTGGAGAGGAGACTGGAATTCACGGTGTAGCAGTGAA  
ATGCGTAGATATCGTGAGGAAGACCAGCGGCGAAGGCGGGTCTCTGGACAGTTCCTGACG  
CTGATGCACGAAGGCCAGGGGAGCGAACGGGATTAGAAACCCTAGTAGTCC  
>Otu2934  
CCAGCCTATGGGGAGCACCAGTCGAGGATCTTCGTCAATGGGCGCAAGCCTGAACGAGCG  
ATGCCGCGTGCGCGATGAAGGCCTTCGGGTGTAAAGCGCGAAAGAGTGAATAAAGGCGA  
AAGCTTGATTGATACTCAGTAAGCTCGGGCTAAGTTTCGTGCCAGCAGCCGCGGTAAGACG  
AACCAGCGAAGCTTGTTTCGGAATCACTGGGCTTAAAGGGCGCGTAGGCGGGTGGACAAG  
TCTGTGGTGAAATACTTCAGCTCAACTGGAGAAGTCCGCTGGATACTGTTTCATCTCGAGG  
AAGGTAGGGGCAAGTGGAAGTGGTGGTGGAGCGGTGAAATGCGTTGATATCATCAGGAAC  
TCCGGTGGCGAAGGCGACTTGCTGGACCTTTTCTGACGCTGAGGCGCGAAAGCCAGGGGA  
GCAAACGGGATTAGATACCCGAGTAGTCC  
>Otu2937  
CCAGCCTATGGGACGCAGCAGTCGAGAATTTTTCTCAATGGGCGAAAGCCTGAAGGAGCG  
ACGCCGCGTGGGGGATGAAGGGCTTCGGCCGTAACCCCTGTCAATTTGCGAACAAACCT  
TACCATTTAATAGGTGGTGAGCTGATTGTAGCGAAAGAGGAAGGGACGGCTAACTCTGTG  
CCAGCAGCCGCGGTAATACAGAGGTCCCAAGCGTTGTTTCGGATTCACTGGGCGTAAAGGG  
TGCGTAGGTGGTGGGGTAAGTTTGATGTGAAATCTCCGGGCTTAACCCGAAACTGCATT  
GAACACTATCTCACTCGAGGCTTGGAGGGGGGACTGGAATTCCTCGGTGTAGCAGTGAAAT  
GCGTAGATATCGAGAGGAACACCAGTGGCGAAGGCGAGTCCCTGGACAACACCTGACACT  
GAGGCACGAAAGCTAGGGGAGCAAACAGGATTAGATACCCGAGTAGTCC  
>Otu2944  
CCAGCCTATGGGGTGCTGCAGTGGGGAATATTGGACAATGGGCGCAAGCCTGATCCAGCG

ATGCCGCGTGTGTGAAGAAGGCCTGCGGGTTGTAAAGCACTTTCGGTGGGGAGGAAAAGAC  
TCTAGGCTAATACCCTGGAGAGTTGACGTTACCCACAGAAGAAGCACCGGCTAACTCTGT  
GCCAGCAGCCGCGGTAATACAGAGGGTGCAAGCGTTAATCGGAATTACTGGGCGTAAAGG  
GTGCGTAGGTGGTTTGATAAGTTAGGTGTGAAAGCCCTGGGCTTAACCTGGGAATTGCGC  
CTAATACTGTCAAAGTAGAGTACTGTAGAGGGAGGTGGAATTTCCGGTGTAGCGGTGAAA  
TGCGTAGATATCGGAAGGAACATCAGTGGCGAAGGCGACTTCCTGGACAGATACTGACAC  
TGAGGCACGAAAGCGTGGGGAGCGAACAGGATTAGAAACCCCTGTAGTCC

>Otu2945

CCAGCCTACGGGGGGCTGCAGTGGGGAGTTTTGCGCAATGGACGAAAGTCTGACGCAGCG  
ACGCCGCGTGGGTGAAGAAGGCCTTCGGGTGTAAAGCCCTGTCGAGTGGGACAAATGGC  
ATCCGTAATAATACGACGGGTGCGTGATGGTACCACTAAAGGAAGCACCGGCTAACTCCG  
TGCCAGCAGCCGCGGTAATACGGAGGGTGCAAGCGTTGTTTCGGAATTATTGGGCGTAAAG  
GGCAGGTAGGTGGTCTTAGAAGTCAACTGTGAAAGCCCCGAGCTTAACTTGGGAAGTGCG  
GTTGATACTCTTAGACTAGAGTGCTGGATGGGTGCGTGGAATTCTCGGTGTAGCGGTGAA  
ATGCGTAGATATCGAGAGGAACACCAGAGGCGAAAGCGGCGCACTGGACAGTAACTGACA  
CTCAGCTGCGAAAGCGTGGGGAGCAAACAGGATTAGAACCCCGGTAGTCC

>Otu2947

CCAGCCTATGGGTTGCTGCAGTCAAGAACTTTCACAATGGACGAAAGTCTGATGGAGCG  
ACGCCGCGTGTGGGAAGAAGGCCCTCGGGTCGTAAACCGCTGTCGAAGGGGACGATTTTG  
ACGGTACCCCTTGAGGAAGCCCCGGCTAACTACGTGCCAGCAGCCGCGGTAAGACGTAGG  
GGGCGAGCGTTATTTCGGAATCATTGGGCGTAAAGCGCTCGTAGGCGGCTCCGCAAGTCCG  
TGAAGAAAGACCTGGGCTCAACCCAGGGAACGGCACGGATACTGCGGGGATTGAGGGAAT  
CAGAGGGTGATGGAATTCCTGGTGTAGCGGTGAAATGCGTAGATATCGGGAGGAACACCA  
GTGGCGAAGGCGATCACCTGGGGTTCAACTGACGCTGAGGAGCGAAAGCTAGGGGAGCAA  
ACGGGATTAGAGACCCGAGTAGTCC

>Otu2951

CCAGCCTACGGGGGGCAGCAGTAGGGAATCTTGCGCAATGGGGGAAACCCCTGACGCAGCC  
ATGCCGCGTGAATGATGAAGGTCTTAGGATTGTAAATTCCTTTCAGCGGGGAAGATAATG  
ACTGTACCCCGCAGAAGAAGCTCCGGCTAACTTCGTGCCAGCAGCCGCGGTAATACGAAGG  
GGGCTAGCGTTGCTCGGAATTACTGGGCGTAAAGGGCGCGTAGGCGGGTGTTTTAAGTCAG  
AGGTCAAATCCCAGGGCTCAACCCTGGAAGTGCCTTTGATACTGGGCACCTAGAGTACGG  
GAGAGGTGTGTGGAAGTCCGAGTGTAGAGGTGAAATTCGTAGATATTTCGGAAGAACACCA  
GTGGCGAAGGCGACACACTGGCCCGTTACTGACGCTGAGGCGCGAAAGCGTGGGGAGCAA  
ACAGGATTAGAAACCCCGTAGTCC

>Otu2952

CCAGCCTATGGGTTGCTGCAGTCGAGAATCTTCCGCAATGGGCGCAAGCCTGACGGAGCG  
ACGCCGCGTGGTTGATGAGGTCTTAGGGACGTAAAAACCTTTTATGAGCAAAAAGTAA  
TTGATTAGCTCATGAATAAGGGGTTGCTAAACTCGTGCCAGCAGCAGCGGTAATACGAGT  
GCCCCAAGCGTTATCCGGAATCATTGGGCGTAAAGGGTGTGTAGGTGGTTGTATTAGTCT  
TCTGTTAAATTCCTCGGCTCAACCGGGGACCTGCGGAGGAAACGGTACGACTAGAGGATG  
CGAGGGGAATATGGAAGTCAAGTGGAGGGGTGAAATCCGTTGATATTATGGGGAACACC  
GAAAGCGAAGGCAGTATTCTGGCGCATTCCTGACACTGAAACACGAAAGCGTGGGTAGCG  
AATGGGATTAGATACCCCTGTAGTCC

>Otu2953

CCAGCCTACGGGTTGCTGCAGTCGAGGATCTTCCGCAATGGGCGCAAGCCTGACCGAGCG  
ACGCCGCGTGTGCGATGAAGGCCTTCGGGTGTAAAGCACTGTCGAGGGGGAGAGACGCC  
CGCAAGGGCTTGATCTATCCCTGGAGGAAGCACGGGCTAAGTTCGTGCCAGCAGCCGCGG  
TAAGACGAACCGTGCAACGTTGTTTCGGAATCACTGGGCTTAAAGGGCGCGTAGGCGGCC  
CATCAAGTCAGGGGTGAAATCCTCCAGCTTAACTGGAGAAGTGCCTTTGATACTGGTGGG  
CTCGAGGGGTGCAGGGGCATGTGGAAGTTCGGTGGAGCGGTGAAATGCGTAGATATCGG  
AAGGAACGCCGTGGCGAAAGCGACGTGCTGGACACCTTCTGACGCTGAGGCGCGAAAGC  
CAGGGGAGCAAACGGGATTAGATACCCGCGTAGTCC

>Otu2961

CCAGCCTACGGGTGGCTGCAGTGGGGAATATTGGACAATGGGGGCAACCCCTGATCCAGCA  
ACGCCGCGTGAATGAAGAAGGCCCTCGGGTTGTAAAGTTCTTTTGCGTGGGAACAAAAGT  
AATGTGCTAATACCACATTGCGTTGATAGTACCACGAGAATAAGCACCGGCTAACTACGT  
GCCTGCAGCCGCGGTAATACGTAGGGTGCAAGCGTTAATCGGAATTACTGGGCGTAAAGG  
GTGCGCAGGCGGCTATATAAGTCAGATGTGAAATACCTAAGCTTAACTTGGGGGGTGCAT

TTGATACTGTATGGCTAGAGTTAGTCAGAGGGGGGTAGAATTCCTGGTGTAGCGGTGAAA  
TGCGTAGAGATCAGGAGGAATACCAATGGCGTAGGCAGCCCCCTGGGACAAAACCTGACGC  
TCATGTACGAAAGCGTGGGAAGCAAACAGGATTAGAGACCCGAGTAGTCC

>Otu2966

CCAGCCTACGGGTGGCTCCAGCGGGGAATATTGGACAATGGGGGAAACCCCTGATCCAGCA  
ATGCCGCGTGTGTGAAGAAGGCCTTCGGGTGTAAAGCACTTTCAGTGGGGAGAAAGGGG  
TTTGCCTTAATACCGCAAATCATTGATGTTACCCAAAGAAGAAGCACCGGCTAACTCTGT  
GCCAGCAGCCGCGGTAATACAGAGGGTGCAAGCGTTAATCGGAATGACTGGGCGTAAAGC  
GTGTGTAGGTGGTTGGATAAGTTAGATGTGAAATCCCCGGGCTTAACCTGGGAACTGCGT  
TTAAACTGTTCAGCTAGAGTACTGTAGAGGATAGTGGAATTTCCAGTGTAGCGGTGAAA  
TGCGTAGATATTGGAAGGAACACCAGTGGCGAAGGCGACTGTCTGGACAGATACTGACAC  
TGAGACACGAAAGCGTGGGGAGCAAACAGGATTAGATAACCCGTGTAGTCC

>Otu2970

CCAGCCTACGGGGTGCTGCAGTTAGGAATTTTCCGCAATGGGCGAAAGCCTGACGGAGCA  
ACGCCGCGTGAGTGATGAAGACCCTAGGGTTGTAAAGCTCTGTGCGAGGGGAAGAAATAT  
GACGGTACCCTCCAAGAAAGCCCCGGCTAACTACGTGCCAGCAGCCGCGGTAATACGTAG  
GGGCGAGCGTTATCCGGATTACTGGGCGTAAAGCGCGTTAAGGCGGTTGGCAAAGTTG  
GTTGTGAAATCTCAGGGCTCAACCCTGAAATTGCGACCAATACTGGTCGACTAGAGTGCA  
AGAGAGGAAGGTGGAATTCCCGGTGTAGTAGTGAAATGCGTAGATATCGGGAGGAACACC  
AGTGGCGAAGGCGGCCTTCTGGCTTGTAACCTGACGCTGTAGCGCGAAAGCGTGGGGAGCG  
AACCGGATTAGAAACCCTCGTAGTCG

>Otu2971

CCAGCCTATGGGGGGCAGCAGTGGGGAATATTGCGCAATGGGCGAAAGCCTGACGCAGCG  
ACGCCGCGTGAGTGATGAAGGCTTTCGGATTGTAAACTTCTGTTAAGTGGGAAAAAAGTT  
CATTTCTTAATACGAAATGAAGATGATGGTACCCTAAAGAAAGCACCGGCTAATCTCGT  
GCCAGCAGCCGCGGTAATACGAGAGGTGCTAGCGTTATTCGGATTTATTGGGTGTAAAGG  
GCGCGTAGACGGCGTGTTAAGTTTATTGTTAAATCCTCCGGCTCAACTGGAGATAGGCGG  
TTAATACTGGCATGCTAGAGGATGGAAGAGAGAAGTGGAAATTCCTCGGAGTAGCGGTAAAA  
TGCGTAGATCTCGAGAGGAACACCGATGGCGAAGGCAGCTTCTTGGTCCACTCCTGACGT  
TGAGGCGCGAAAGCGTGGGGAGCAAACAGGATTAGAAACCCAGTAGTCC

>Otu2973

CCAGCCTACGGGGTGCTCCAGTGGGGAATATTGGACAATGGGCGCAAGCCTGATCCAGCC  
ATGCCGCGTGAGTGAAGAAGGCCTTAGGGTTGTAAAGCCCTTTTGGCGGGGACGATAATG  
ACGGTACCCGCGAGAATAAGCCCCGGCTAACTTCGTGCCAGCAGCCGCGGTAATACGAAGG  
GGGCTAGCGTTGTTTCGGAATCACTGGGCGTAAAGCGCACGCAGGCGGATTGATAAGTCAG  
GGGTGAAATCCCGGAGCTCAACTTCGGAATTGCCTTTGATACTGAGGATCTTGAGTTCGG  
GAGAGGTGAGTGGAATGCGAGTGTAGAGGTGAAATTCGTAGATATTTCGAAGAACACCA  
GTGGCGAAGGCGGCTCACTGGCCCCGATACTGACGCTGAGGCACGAAAGCGTGGGGAGCAA  
ACAGGATTAGATAACCCGAGTAGTCC

>Otu2975

CCAGCCTACGGGTCGCTCCAGGGGGGAATATTGCGCAATGGGCGAAAGCCTGACGCAGCG  
ACGCCGCGTGAGGATGAAGGCTTTAGGATTGTAAACTCCTGTCAGATGGAAAGAAAAGT  
CTGCGTTTTAATAGACGCGGAATATGACGGTACCATCAGAGGAAGCACCGGCTAACTTCGT  
GCCAGCAGCCGCGGTAATACGAAGGGTGCAAGCGTTATTCGGAATCACTGGGCGTAAAGG  
GTGTGTAGACGGTATGTTAAGTTCGTCGTTAAAGGCTCCGGCCTAACTGGAGTATTGCGA  
TGAAAACCTGGCGTGCTAGAGGTGAGAGAGAGAAGTGGAAATCCCGGAGTAGCGGTAAAT  
GCGTGGATCTCGGGAGGAACACCAATGGCGAAGGCAGCTTCTTGGCTCATTCCTGACGTT  
GAGGCACGAAAGCGTGGGGAGCAAACAGGATTAGAAACCCTAGTAGTCC

>Otu2976

CCAGCCTATGGGGCGCAGCAGTGGGGAATATTGGACAATGGGCGCAAGCCTGATCCAGCC  
ATGCCGCGTGAGTGATGACGGCCTTAGGGTTGTAAAGCTCTTTCGCTAGGGACGATAATG  
ACGGTACCAGTGGAAGAAGCCCCGGCTAACTTCGTGCCAGCAGCCGCGGTAATACGAGGG  
GGGCAAGCGTTGTTTCGGAATTATTGGGCGTAAAGGGCGCGTAGGCGGTGCGGCAAGTCAC  
CTGTGAAACCTCCGGGCTCAACCCGGAGCCTGCAGGCGAAACTGCCGTGCTGGAGTATGG  
TAGAGGTGCGTGGAATTCCTGGTGTAGCGGTGAAATGCGTAGATATCGGGAGGAACACCT  
GTGGCGAAAGCGGCGCACTGGACCATAACTGACGCTGAGGCGCGAAAGCTAGGGGAGCAA  
ACAGGATTAGAAACCCCTGTAGTCC

>Otu2981

CCAGCCTACGGGGGGCTGCAGTGGGGAATTTTGGACAATGGGCGCAAGCCTGATCCAGCC  
ATTCCGCGTGAGTGAAGAAGGCCTTCGGGTGTAAAGCTCTTTCGGCGGGGAAGAAATCG  
GTAAGGATAATACCTTTACTGGACGACGGTACCTGAAGAAGAAGCACCGGCTAACTACGT  
GCCAGCAGCCGCGGTAATACGTAGGGTGCAGAGCGTTAATCGGAATTACTGGGCGTAAAGG  
GTGCGCAGGCGGCTCTATAAGACAGATGTGAAATCCCCGGGCTCAACCTGGGAACTGCGT  
TTGTGACTGTAGGGCTAGAGTACGGCAGAGGGGGGTAGAATTCACGTGTAGCAGTGAAA  
TGCGTAGAGATGTGGAGGAATACCGATGGCGAAGGCAGCCCCCTGGGTCGATACTGACGC  
TCATGCACGAAAGCGTGGGGAGCAAACAGGATTAGATACCCTCGTAGTCC

>Otu2983

CCAGCCTATGGGATGCTGCAGTGGGGAATATTGCGCAATGGGCGAAAGCCTGACGCAGCA  
ACGCCGCGTGAGTGAGGAAGGCCTTCGGGTGTAAAGCACTTTCGGTTGGGAAGAAGGGA  
ATTAGTCCTAATAAGATTGGTTCTTGATGGTACCAAAGAAGAAGCACCGGCTAACTTCG  
TGCCAGCAGCCGCGGTAATACGAAGGGTGCAGAGCGTTATTTCGGATTTATTGGGCGTAAAG  
GGTTCGTAGGCGGGAAATCAAGTCAAGTGTGAAATATCCAGGCTTAACCTGGAAAGTGCA  
TTTGAAACTGTTTTTCTTGAGTGTTGAAGAGGGTGGTGAATTGCTGGTGTAGGAGTGAC  
ATCCGTAGAGATCAGCAGGAACATCGGAGGCGAAGGCGGCCACCTGGTCAATCACTGACG  
CTGAGGAACGAAAGCATGGGGAGCAAACAGGATTAGATACCCTCGTAGTCC

>Otu2986

CCAGCCTACGGGATGCACCAGTCGAGAATCTTCCGCAATGGGCGAAAGCCTGACGGAGCG  
ACGCCGCGTGACTGATGAAGTCCTTAGGGACGTAAAGGTCTTTTATGAGGGAAGAAGTTT  
ATTGACGGTACCTCAGGAATAAGGGGCTCCTAATCTCGTGCCAGCAGGAGCGGTAATACG  
AGAGCCCCGAGCGTTATCCGGAATTACTGGGCGTAAAGGGTGCGTAGGTTGCATTGTTAG  
TCACACGTTAAAACCCCAAGCTTAACTTGGGAAGAGCGTTTGAAACGGCAATGCTAGAGA  
GTGCGAGGGGCATGCGGAACTCATGGTGTAGGGGTGAAATCCGTTGATATCATGGGGAAC  
ACCAAAGCGAAGGCAGCATGCTGGCGCATTTCTGACGCTGAAGCACGAAAGCGTGGGTA  
GCGAATGGGATTAGATACCCGAGTAGTCC

>Otu2988

CCAGCCTACGGGGGGCAGCAGTAAGGAATATTGGTCAATGGACGAAAGTCTGAACCAGCC  
ATGCCGCGTGCAAGGATGAGAGCCTTATGGGTTTTAAACTGCTTTTATCGGGGAGTAAGAA  
TGATTACGAGTAATTTATTTAGCAAGTACCTGAGGAATAAGGATCGGCTAACTCCGTGCCA  
GCAGCCGCGGTAATACGGAGGATTCGAGCGTTATCCGGATTTATTGGGTTTAAAGGGTGC  
GTAGGCGGTAAATTAAGTAAGTGGTGAATGTTTGTGCTTAACAGGAACAGTGCCATTTA  
AACTGATTGACTTGAGTACAGATGAAGTTGGCGGAATGTGTCAAGTAGCGGTGAAATGCA  
TAGATATGACACAGAACACCGACAGCGAAGGCAGCTGACTAAGGTGTAACCTGACGCTGAG  
GCACGAAGGCGTGGGGATCAAACAGGATTAGAAACCCTCGTAGTCC

>Otu2990

CCAGCCTATGGGTGGCAGCAGTAAGGAATATTGGTCAATGGACGCAAGTCTGACCGAGCG  
ACGCCGCGTGCGGGATGAAGGCCTTCGGGTGTAAACCGCTGTCAGAGGGGATGAAATTC  
ATTTGGGTTCCTCCAGATGATTGACAGAGCCTCAGAGGAAGCACGGGCTAAGTACGTGCC  
AGCAGCCGCGGTAATACGTACTGTGCGAACGTTATTTCGGAATCACTGGGCTTAAAGGGTG  
TGTAGGCGGCCAGCTAAGTAGGGTGTGAAAGGCCTCGGCCTAACCGAGGCATTGCGCTCT  
AAACTGACTGGCTTGAGTGAGATAGGGGTGTGCGGAACCTCCAGTGGAGCGGTGAAATGT  
GTTGATATTGGAAGGAACGCCGCTGGCGAAAGCGGCACACTGGGTCTCGTCTGACGCTGA  
GACACGAAAGCCAGGGGAGCGAACGGGATTAGATACCCTTGTAGTCC

>Otu2996

CCAGCCTATGGGGGGCTCCAGTGGGGAATCTTGACAATGGGGGCAACCCTGATGCAGCG  
ACGCCGCGTGAGCGATGAAGCCCTTCGGGTGTAAAGCTCTTTCGGCAGGAACGATAATG  
ACGGTACCTGAAGAAGAAGCTGCGGCTAACTACGTGCCAGCAGCCGCGGTAATACGTAGG  
CAGCAAGCGTTGTTCCGAGTTACTGGGCGTAAAGAGTGTGTAGGCGGCGTTCTAAGTCTG  
GTGTGAAATCTCCCGGCTCAACTGGGAGGGTGCGCCGGAGACTGGGATGCTTGAGTATGG  
GAGAGGAAAGCGGAATTCCTGGTGTAGCGGTGAAATGCGTAGGTATCAGGAGGAACACCT  
GCGGTGTAGACGGCTTTCTGGACCATCACTGACGCTGAGACACGAAAGCGTGGGTAGCAA  
ACAGGATTAGATACCCTTGTAGTCC

>Otu2997

CCAGCCTACGGGGGCGCTGCAGTGGGGAATTTTGCAGCAATGGGGGAAACCCTGACGCAGCA  
ACGCCGCGTGAGGATGAAGTATCTTGGTACGTAAACTCCTTTTCGATGGGGAAGATTATG  
ACGGTACCCATAGAAGAAGCCCCGGCTAACTTCGTGCCAGCAGCCGCGGTAATACGTAGG  
GTGCAAGCGTTAATCGGAATTACTGGGCGTAAAGCGTGCGCAGGCGGTTTCGCTAAGACAG

ATGTGAAATCCCCGGGCTTAACCTGGGAACTGCATTTGTGACTGGCGGGCTAGAGTATGG  
CAGAGGGGGGTAGAATTCCACGTGTAGCAGTGAAATGCGTAGAGATGTGGAGGAATACCG  
ATGGCGAAGGCAGCCCCCTGGGCCAATACTGACGCTCATGCACGAAAGCGTGGGGAGCAA  
ACAGGATTAGATACCCGTGTAGTCC

>Otu2998

CCAGCCTATGGGTTGCTCCAGTGGGGAATCTTGACACAATGGGGGAAACCCCTGATGCAGTG  
ACGCCGCGTGAGCGATGAAGCCCCCTCGGGGTGTAAAGCTCTTTCGGCAGGGAAGATTATG  
ACGGTACCTGCAGAAGCAGCTGCGGCTAACTACGTGCCAGCAGCCGCGGTAATACGTAGG  
CAGCAAGCGTTGTTTCGGAATTACTGGGCGTAAAGAGTGCGTAGGCGGTGTTCTAAGTCTG  
TTGTGAAATCTCCTGGCTCAACTGGGAGGGTGCGGCGGAGACTGGAATGCTAGAGTATGG  
GAGAGGTAAGCGGAATTCCTGGTGTAGCGGTGAAATGCGTAGATATCAGGAGGAACACCT  
GTGGTGTAGACAGCTTACTGGACCATGACTGTCGCTGAGGCACGAAAGCGTGGGTAGCAA  
ACAGGATTAGAAACCCCTGTAGTCC

>Otu3000

CCAGCCTACGGGAGGCAGCAGTGGGGAATCTTGCGCAATGGGCGAAAGCCTGACGCAGCA  
ACGCCGCGTGGGGGATGAAGGCTCTCGGGTCGTAAACCCCTTTCAGTGGGAACGAAAATG  
ACGGTACCCACAGAAGAAGGACCGGCCAACTACGTGCCAGCAGCCGCGGTAACACGTAGG  
GTCCGAGCGTTGTCCGATTTATTGGGCGTAAAGGGCCCGTAGGCGGCTTGATAAGTTCGG  
GTGTGAAAACCTCCAGGCTCAACCTGGAGACGCCACCCGATACTGTCATGGCTTGAGTCTG  
GTAGGGGAGTGCGGAATTCCTGGTGTAGCGGTGAAATGCATAGATATCAGGAGGAACACC  
GGTGGCGAAGGCGGCACTCTGGGCCAGTACTGACGCTGATGGGCGAAAGCGTGGGGAGCA  
AACAGGATTAGAAACCCCTCGTAGTCC

>Otu3003

CAGCCTACGGGTGGCAGCAGTGGGGAATATTGGACAATGGGGGCAACCCTGATCCAGCGA  
TGCCGCGTGGGTGAAGAAGGCCTTCGGGTGTAAAGCCCTTTAGGTTGGGACGAAGGATG  
TTGGGTTAATACCCCAGCATTTTGACGGTACCGACAGAATAAGCACCGGCAAACCTCTGTG  
CCAGCAGCCGCGGTAAAACAGAGGGTGCGAGCGTTAATCGGAATTACTGGGCGTAAAGGG  
CGCGTAGGCGGTGAGTGTGATGTGAAAGCCCTGGGCTTAACCTAGGAAGTGCATC  
GCAAACGACTCGACTGGAGTATAAGAGAGGGTGGCGGAATTTCCGGTGTAGCGGTGAAAT  
GCGTAGAGATCGGAAGGAACGTCAATGGCGAAGGCAGCCACCTGGCTTAATACTGACGCT  
GAGGCGCGAAAGCGTGGGGATCGAACAGGATTAGAAACCCCGAGTAGTCC

>Otu3005

CCAGCCTACGGGTGTCAGCAGTAAGGAATATTGGTCAATGGGCGCAAGTCTGAACCAGCC  
ATGCCGCGTGAGGATGAAGGCCCTTCGGGTGTAAAGCTCTTTTATCTATGAAGAAATC  
ACCTGTTTCTACGGGTGTTGACGGTAATAGAGGAATAAGCACCGGCTAACTCCGTGCCAG  
CAGCCGCGGTAATACGGAGGGTGCAAGCGTTATCCGGATTTACTGGGTTTAAAGGGTGCG  
TAGGCGGGTTGATAAGTCAGTGGTGAAAGCCCCGAGCCTAACTCGGGAACGCCATTGAT  
ACTATCAATCTTGAATTCAGTTGAGGTGGGCGGAATGTGTCGTGTAGCGGTGAAATGCTT  
AGATATGACACAGAACACCAATTGCGAAGGCAGCTCGCTAACTGACATTGACGCTGAGG  
CACGAAAGCGTGGGGATCAAAACAGGATTAGAAACCCCGTAGTCC

>Otu3013

CCAGCCTACGGGTCGCACCAAGTGGGGAATATTGGACAATGGGGGCAACCCTGATCCAGCA  
ATGCCGCGTGAGTGATGAAGGCCTTCGGGTGTAAAGCTCTTTTGTGCGGGGACGATGATG  
ACGGTACCCGACGAATAAGCTCCGGCTAACTTCGTGCCAGCAGCCGCGGTGATACGAAGG  
GAGCTAGCGTTGTTTCGGAATGACTGGGCGTAAAGGGCGCGTAGGCGGTTTTATAAGTTTG  
ATGTGAAAGCCCTGGGCTTAACCTAGGAATAGCATTGGATACTGTAAGACTAGAGTCCGA  
GAGGGGGAAATGGAATTGCGAGTGTAGAGGTGATATTCGTAGATATTCGCAAGAACACCA  
GTGGCGAAGGCGATTTCTGTTTCGTACTGACGCTAAGGCGCGAAAGCGTGGGGAGCAA  
ACAGGATTAGATACCCGAGTAGTCC

>Otu3016

CCAGCCTACGGGAGGCACCAGTAGGGAATTTTCCACAATGGGCGAAAGCCTGATGGAGCA  
ACGCCGCGTGAGGATGAATGTCTTCGGATTGTAAAGCTCTTTTATCTGTGACGATTATG  
ACGGTAGCAGATGAATAAGGATCGGCTAACTCCGTGCCAGCAGCCGCGGTCATACGGAGG  
ATCCAAGCGTTATCCGGAATTACTGGGCGTAAAGAGTTGCGTAGGCGGCAAGTTAAGCAG  
AGCATGAAAGCGTGTGGCTCAACCATAACAGCTATGTTCTGAACTGGCTAGCTAGAGGACG  
AGAGAGGTAACCTGGAATTCCTAGTGTAGGAGTGAAATCCGTAGATATTAGGAGGAACACC  
GATGGCGTAGGCAGGTTACTGGCTCGTTCTGACGCTCAGGCACGAAAGCGTGGGTAGCG  
AACTGGATTAGAAACCCGAGTAGTCC

>Otu3020

CCAGCCTATGGGTTGCACCAGTGGGGAATATTGCGCAATGGGCGAAAGCCTGACGCAGCG  
ACGCCGCGTGAGGATGAAGGCTTTCGGATTGTAACTTCTGTAAAGTGGGAAAAAGTG  
TCATTCCTAATACGAATGAAAGATGATGGTACCCTAGAGAAAGCACCGGCTAATCTCGT  
GCCAGCAGCCGCGTAATACGAGAGGTGCTAGCGTTATTTCGGATTAATTGGGTGTAAAGG  
GTGCGTAGACGCGCGTTAAGTTTGTGTAAATCCTCCGGCTTAACCGGAGATATGCGG  
CAAAAAGTGGCGTGCTAGAGGATGGAAGAGAGAAGTGAATTCTCGGAGTAGCGGTAAAA  
TGCGTAGATCTCGAGAGGAACACCGATGGCGAAGGCAGCTTCTTGGTCCATTCTGACGT  
TGAGGCACGAAAGCGTGGGGAGCAAACAGGATTAGAGACCCCGTAGTCC

>Otu3021

CCAGCCTACGGGGGGCAGCAGTAGGGAATATTGCGCAATGGAGGAACTCTGACGCAGCG  
ACGCCGCGTGAGGATGAAGGCTTTCGGGTCGTAACTCCTGTCGGAAGGGACGAAAGTT  
TTAGGGCTAATATCCCTAGAATCTGACGGTACCTTTAAAGGAAGCACCGGCTAACTACGT  
GCCAGCAGCCGCGTAATACGTAGGGTGCAAGCGTTGTTTCGGAATTATTGGGCGTAAAGC  
GCGTGTAGGTGGCTATATAAGTCGAGTGTGAAATCCCTGGGCTCAACCGAGGAAGTGCAC  
TCGAAACTGCATAGCTAGAGGATAGTAGAGGAAGGTGGAATTCCTAGTGTAGAGGTGAAA  
TTCGTAGATATTAGGAGGAATACCGGTGGCGAAGGCGACCTTCTGGGCTATTCTGACAC  
TGAGACGCGAAAGCATGGGTAGCGAACAGGATTAGATACCCTAGTAGTCC

>Otu3022

CAGCCTACGGGGGGCTGCAGTGAGGAATATTGGACAATGGGCGTAAGCTTGATCCAGCAA  
TACCTACTGAGTGATGAAGAGAATTTTGTAAACTTAGAGGATAAGGAAGATTGTGACTT  
TACTTAATCCTTAGTCCTGGCTAACTTCGTGCCAGCAGCCGCGGTAAAACGGAGGGGACA  
AGTGTTACTCATAATGACTGGGCGTAAAGGGTACGTAGATTGTTAAAAAGTAGTGAGTA  
AAATAAAAGTTTAATCACTTTTCATGCTTACTAACTATTTAGCTTGAGTTAATTAGAGG  
GTAGTGGTACTTTTGGTGGAGAGGTGATATTCGACGATATCAAAGGACAATCGAAGGCG  
AAGGCAACTACCTGGAGTTAACTGACGTTGAGGTACTGAAGCGTGGGGATCAAATCGGAT  
TAGAAACCCCTGTAGTCC

>Otu3031

CCAGCCTACGGGTGGCAGCAGTGGGGAATCTTGCAATGGGCGAAAGCCTGATGCAGCA  
ATGCCGCGTGAGTGATGAAGGCCTTTCGGGTTGTAAATCTCTGTCGGGCGGGAAAAATGTG  
CTTATGGATAATATTCATAGGCAGTGATGGTACCGCTAAAGGAAGAGGCGGCTAATTCTG  
TGCCAGCAGCCGCGTAATACAGAAGCCTCGAGCGTTGTTTCGGAATTACTGGGCGTAAAG  
GGAATGTAGGTGGTGATGTAAGTCAGATGTGAAAGCCCCGGGCTTAACCTGGGAAGTGCA  
TTTGATACTGCGTCGCTAGAGCACGAGAGAGGAAAGTGAATTCCAGGTGTAGGGGTGAA  
ATCCGTAGATATCTGGAGGAATACCAATGGCGAAGGCAGCTTCTTGCTCGTAACTGACA  
CTGAGATTGCAAAGCATGGGTAGCAAACAGGATTAGATACCCTCGTAGTCC

>Otu3034

GGACTACGCGGGTATCTAATCCTGTTTGATCCCCACGCTTTCGTGCCTCAGTGTGAGTTG  
TAGTTTTGTAAAGCTGCCTTCGCAATGGGTGTTCTGTGTCATATCTAAGCATTTACCGCT  
ACATGACACATTCCACTTACATCAAATACACTCAAGAACGACAGTATCAATGGCAGGTCT  
GCAGTTGAGCTGCAGTTTTTCACCACTGACTTGACGTTCCACCTACGCACCCTTTAAACC  
CAGTAAATCCGGATAACGCTCGGATCCTCCGTATTACCGCGGCTGCTGGCACGGAGTTAG  
CCGATCCTTATTCTTACGGTACCATCAACCCTCGTAGAAACAAGGGGTTTTTTCCCGTAC  
AAAAGCAGTTTACGATCCGTAGGACCTTCATCCTGCACGCGGCATGGCTGGTTCAGACTT  
GCGTCCATTGACCAATATTCTTACTGCTGCAACCCATAGGCTGG

>Otu3036

CCAGCCTATGGGGGGCAGCAGTGGGGAATATTGGACAATGGGGGGAACCCTGATCCAGCA  
ATGCCGCGTGTTGTAAGAAGGCCTGAGGGTTGTAAAGCACTTTCAGTAGGGAGGAGTATT  
TTCTGGTTAAGAGCTGGGGGATTGGACGTTACCTACAGAAGAAGCACCGGCTAACTCCGT  
GCCAGCAGCCGCGTAATACGGAGGGTGCGAGCGTTAATCGGAATTACTGGGCGTAAAGC  
GTGCGTAGGTGGTTGAATAAGTTATCTGTGAAGTCCCTGGGCTCAACCTGGGCAGGTGAG  
ATGATACTGTTTAACTCGAGTATGGGAGAGGGTAGTGGAATTTCCGGTGTAGCGGTGAAA  
TGCGTAGAGATCGGAAGGAACACCAAGTGGCGAAGGCGGCTACCTGGCCTAATACTGACAC  
TGAGGCACGAAAGCGTGGGGAGCAAACAGGATTAGAGACCCGCGTAGTCC

>Otu3042

CCAGCCTACGGGACGCTCCAGTGGGGAATATTGGACAATGGGCGAAAGCCTGATCCAGCA  
ATGCCGCGTGTTGTAAGAAGGCCTTTCGGGTTGTAAAGCACTTTCAGTAGGGAGGAGGGTT  
GATTGGTTAAGAGCTGATTGATTGGACGTTACCCACAGAAGAAGCACCGGCTAACTCCGT



GCCAGCAGCCGCGGTAATACGGAGGGTGCGAGCGTTAATCGGAATTACTGGGCGTAAAGG  
GTGCGTAGGTGGTTAGTTAAGTTATCTGTGAAATCCCTGGGCTTAACCTGGGCAGGTCAG  
ATAAGACTGATTGACTCGAGTATTGGAGAGGGTAGTGGAATTTCCGGTGTAGCGGTGAAA  
TGCGTAGAGATCGGAAGGAACACCAGTGGCGAAGGCGGCTACCTGGCCAAATACTGACAC  
TGAGGCACGAAAGCGTGGGGAGCAAACAGGATTAGATACCCCTAGTAGTCC

>Otu3044

CCAGCCTATGGGGCGCACCAAGTGAAGGAATCTCGCACAAATGGACGAAAGTCTGATGCAGCG  
ACGCCGCGTGAAGGATGAAGGTCTTCGGATTGTAACTTCTGTAAAGCGGGACGAAATAC  
TCATACCTAATACGTATGAGAGATGACGGTACCGCTAGAGAAAGCACCGGCTAACTTCGT  
GCCAGCAGCCGCGGTAATACGAGGGGTGCAAGCGTTATCCGGAATTATTGGGCGTAAAGG  
GCGCGTAGGTTGCTTATTAAGTCTGTTGTTAAATCTCCCGGCCTAACCGGGAATCTGCGA  
TGGATACTGATGAGCTAGAGGATGGAAGAGAGAGGTGGAATTCTCGGAGTAGCGGTAAAA  
TGCGTAGATCTCGAGAGGAACACCGATGGCGAAGGCAGCCTCTTGGTCCATTCTGACAC  
TGATGCGCGAAAGCGTGGGGAGCAAACAGGATTAGATACCCCTGTAGTCC

>Otu3047

CCAGCCTATGGGGTGCTGCAGTGGGGAATTTTGGACAATGGGCGCAAGCCTGATCCAGCA  
ATGCCGCGTGAGTGAAGAAGGCCTTCGGGTTGTAAAGCTCTTTTGTGTCAGGGAAGAAAAGG  
CACGCTCGAATAAAGTGTGTTTCATGACGGTACCTGAAGAATAAGCACCGGCTAACTACGT  
GCCAGCAGCCGCGGTAATACGTAGGGTGCAAGCGTTAATCGGAATTACTGGGCGTAAAGC  
GTGCGCAGGCGGTTTTTTAAGTCAGATGTGAAATCCCCGGGCTCAACCTGGGAATGGCAT  
TTGAGACTGGAAGCTGGAGTGTGTCAGAGGGGGGTGGAATTCACGTGTAGCAGTGAAA  
TGCGTAGAGATGTGGAGGAACACCGATGGCGAAGGCAGCCCCCTGGGATAACACTGACGC  
TCATGCACGAAAGCGTGGGGAGCAAACAGGATTAGATACCCCGGTAGTCC

>Otu3049

CCAGCCTATGGGTCGCACCAAGTGGGGAATTTTGCGCAATGGGGGAAACCTGACGCAGCA  
ACGCCGCGTGAGGATGAAATATCTTGGTATGTAACTCCTTTTCGATGGGGAAGATTATG  
ACGGTACCCATAGAAGAAGCCCCGGCTAACTTCGTGCCAGCAGCCGCGGTAATACGAGGG  
GGGCAAGCGTTGTTTCGGAATTATTGGGCGTAAAGGGTGCGTAGGCGGTTTTGTAAAGTCTG  
ATGTGAAATCTATGGGCTCAACTCATAGACTGCATCGGAACTGCAGGGCTTGAGTGTGG  
GAGAGGTGAGTGGAATTCCTGGTGTAGCGGTGAAATGCGTAGATATCAGGAGGAACACCT  
GTGGCGAAAGCGGCTCACTGGACCACAACCTGACGCTGATGCACGAAAGCTAGGGGAGCAA  
ACAGGATTAGATACCCCTGTAGTCC

>Otu3056

CGCCTACGGGGGCGCAGCAGTAGGGAATATTGGACAATGGGCGAAAGCCTGATCCAGCAAT  
GCCGCGTGAGTGAGGAAGGCCTTAGGGTTGTAAAGCTCTTTCGGCGGGGACGATGATGAC  
GGTACCCGCGAGAAGAAGCCCCGGCTAACTTCGTGCCAGCAGCCGCGGTAATACGAAGGGG  
GCGAGCGTTGTTTCGGAATTACTGGGCGTAAAGGGCGCGTAGGCGGCCATCTTTGTACGGC  
GTGAAAGCCCCGGGCTCAACCTGGGAATTGCGCTTGGGACGGGATGGCTTGAGTTCGGGA  
GAGGAGAGTGGAATTCACAGTGTAGAGGTGAAATTCGTAGATATTGGGAAGAACACCGGT  
GGCGAAGGCGGCTCTCTGGACCGATACTGACGCTGAGGCGCGAAAGCGTGGGGAGCAAAC  
AGGATTAGATACCCCTGTAGTCC

>Otu3057

CCAGCCTACGGGGGCGCAGCAGTAAGGAATATTGGTCAATGGGCGCAAGCCTGAACCAGCC  
ACGCCGCGTGACAGGATGAAGGCCCTCTGGGTTGTAACTGCTTTTTTCAGGGACGAAATC  
CCCGTTTTCTACGGGAGTTGACGGTACCTGGTGAATAAGCACCGGCTAACACCGTGCCAGC  
AGCCGCGGTAATACGGAGGGTGCAAGCGTTATCCGGATTTACTGGGTTTAAAGGGTGCGT  
AGGCGGACGTTTAAAGTCAGTGGTGAAGCCCTCCCGCTTAACGGGAGAACTGCCATTGATA  
CTATTCTGCTCTCGAATTCGGTTGAGGTAGATGGAACGTGACATGTAGCGGTGAAATGCTTA  
GATATGTCACAGAACCAATTGCGAAGGCAGTCTGCTAAACCGATATTGACGCTGAGGC  
ACGAAAGCGTGGGGAGCAAACAGGATTAGAAACCCCTGTAGTCC

>Otu3060

CCAGCCTATGGGGGGCTGCAGTCGAGGATCTTTTGCAATGGGCGCAAGCCTGACAAAGCG  
ACGCCGCGTGGGGGAGGAAGGCCTTCGGGTTGTAAACCCCTGTTGTGCGGTTACGAATGGT  
AGGGTGCCAATAGCGCTACTACTTGACTAAGGCCGATGAGGAAGCCACGGCTAACTACGT  
GCCAGCAGCCGCGGTAATACGTAGGTGGCAAGCGTTGTTTCGGAATCACTGGGCATAAAGC  
GCGCGTAGGCGGCTATGTAAGTCGGGTGTGAAATCCCTCGGCTCAACCGAGGAACTGCGC  
TCGATACTGCATGGCTTGAGGTCTGGAGGGGAGAGTGGAATTCCTGGTGGAGCGGTGAAA  
TGCGTAGAGATCGGGAAGAACCGCGGCGCGAAAGCGACTCTCTGGTCAGACCCTGACGC

TGAGGCGCGAAAAGCTAGGGGAGCAAACGGGATTAGATAACCCCGTAGTCC

>Otu3062

CCAGCCTACGGGTGGCTCCAGTGGGGAATATTGGACAATGGGGGCAACCCTGATCCAGCG  
ACGCCGCGTGTGTGAAGAAGGCCTGCGGGTTGTAAAGCACTTTTAGTGGGGATGAAATGT  
GCAGGGTTAATACCTCTGCATTTTGACCTAACCCACAGAAAAAGCACCGGCTAACTCTGT  
GCCAGCAGCCGCGTAATACAGAGGGTGCAAGCGTTAATCGGAATTACTGGGCGTAAAGC  
GTGCGCAGACGGTTATATAAGTCGGGTGTGAAAGCCCCGGGCTCAACCTGGGAATTGCAT  
TCGAGACTGTGTAGCTAGGGTACGGAAGAGGGAAGCGGAATTTTCAGGTGTAGCGGTGAAA  
CGCGTAGATATCTGAAGGAACACCTGTGGCGAAAGCGGCTCACTGGACCACAACCTGACGC  
TGATGCACGAAAAGCTAGGGGAGCAAATGGGATTAGATAACCTTGTAGTCC

>Otu3069

CCAGCCTATGGGTTGCACCAGTGAGGAATTTTCCGCAATGGGCGAAAGCCTGACGGAGCG  
ACGCCGCGTGTGGGAAGAAGGCCTTCGGGTCTGTAAACCCCTTTCAGCAGGGACGAAGCGA  
GAGTGACGGTACCTGCAGAAGAAGCGCCGGCTAACTACGTGCCAGCAGCCGCGGTAACAC  
GTAGGGCGCGAGCGTTGTCCGGAATTATTGGGCGTAAAGAGCTCGTAGGTGGTCCGCTAC  
GTCCGCTGTGAAAACCTAGGGCTTAACCTGGGCTTGCAGTGGATACGGGCAGACTAGAG  
GTAGGTAGGGGAGAATGGAATTCCTGGTGTAGCGGTGAAATGCGCAGATATCGGGAGGAA  
CACCGGTGGCGAAGGCGGTTCTCTGGGCCTTACCTGACACTGAGGAGCGAAAGCGTGGGG  
AGCGAACAGGATTAGAACCCTGGTAGTCC

>Otu3070

CCAGCCTATGGGGGGCAGCAGTGGGGAATCTTACACAATGGGGGAAACCCTGATGTAGCG  
ACACCGCGTGAGCGAAGAAGCCCTTTGGGGTGTAAGCTCTGTTCAGCAGGGACGAAAAAA  
ATGACGGTACCTGCAGAGGAAGCATCGGCTAACTACGTGCCAGCAGCCGCGGTAAGACGT  
AGGATGCGAGCGTTGTCCGGATTTATTGGGCGTAAAGAGTTCGTAGGTGGTTTCATAAGT  
CTGGTGTAAAAGGCGCGGGCCTAACCCGTGTATAGCACTGGATACTGTGAGACTGGAGTT  
AGGTAGAGGCAAGCGGAATTCCTAGTGTAGCGGTGAAGTGCCTAGATATTGGGAAGAACA  
CCGGTGGCGCAAGCGGCTTGCTGGGCCTAAACTGACGCTGAGGAACGAAAGCCAGGGGAG  
CAGATGGGATTAGATAACCTGGTAGTCC

>Otu3075

CCAGCCTACGGGAGGCTGCAGTGGGGAATATTGGACAATGGGGGAAACCCTGATCCAGCG  
ACGCCGCGTGTGTAAAGAAGGCCTGCGGGTTGTAAAGCACTTTTAGTGGGGACAAAAAGC  
TACGGAATAACTCTGTGGTCTTGATTTAACCCAAAGAAAAAGCACCGGCTAACTCTGT  
GCCAGCAGCCGCGTAATACAGAGGGTGCGAGCGTTAATCGGAATTACTGGGCGTAAAGC  
GCGCGTAGACGGTTTTGTAAAGTCAGATGTGAAATCCCTGGGCTCAACCTGGGAACCTGCAT  
TTGATACTGCATGGCTAGAGTATCGAAGAGGGAAGTGGAATTTCCGGTGTAGCGGTGAAA  
TGCGTAGATATCGGAAGGAACACCACTGGCGAAAGCGGATCTCTGGACAGTTCCTGACGC  
TGAGGCACGAAGGCCAGGGGAGCAAACGGGATTAGATAACCCGAGTAGTCC

>Otu3081

CCAGCCTATGGGTTGCACCAGTAGGGAATATTGGGCAATGGAGGCAACTCTGACCCAGCC  
ATCCCGCGTGCAGGACGAAGGCCCTCTGGGTTGTAAACTGCTTTTATTGGGGAAGAAAAA  
TTCTGATTTCATCAGGACTTGACGGTACCCAATGAATAAGCACCGGCTAACTCCGTGCCAG  
CAGCCGCGGTAATACGAGGGTGCAAGCGTTATCCGGATTCAGTGGGTTTAAAGGGTGCG  
TAGGCGGCTTTGCAAGTCAGTGGTGAAAGCCCGCAGCTCAACTGCGGAACCTGCCATTGAA  
ACTGCTTGGCTGGAGTGTTATTGAAGTGGGCGGAATACATCATGTAGCGGTGAAATGCTT  
AGATATGATGTAGAACTCCGATTGCGAAGGCAGCTCACTAAATGACAACCTGACGCTGAGG  
CACGAAAGCGTGGGTAGCAAACAGGATTAGAAACCCTCGTAGTCC

>Otu3083

CCAGCCTATGGGACGCACCAGTCGAGGATCTTCGGCAATGGGCGCAAGCCTGACCGAGCG  
ACGCCGCGTGTGCGATGAAGGCCTTCGGGTGTAAAGCACTGTCGGGGGGGAGAAAAGGG  
CAACCTTGATCGACCCCGGAGGAAGCACGGGCTAAGTTTCGTGCCAGCAGCCGCGGTAAGA  
CGAACCGTGCGAACGTTGCTCGGAATCACTGGGCGTAAGGGGTTTCGTAGGCGGGAATGCA  
AGTCAAGTGTGAAATCCCCAGGCTCAACCTGGGACGTGCATTTGAGACTGTGTTTCTTGA  
GTTTCGAGAGGGTGGTGGAATTGCTGGTGTAGGAGTGACATCCGTAGAGATCAGCAGGA  
ACACCGGAGGCGAAGGCGACCACCTGGCCGAATACTGACGCTGAGGAACGAAAGCGTGGG  
GAGCAAACAGGATTAGAAACCCGAGTAGTCC

>Otu3089

CCGCCTATGGGTGGCTCCAGTGGGGAATATTGGACAATGGGCGGAAGCCTGATCCAGCAA  
TGCCGCGTGTGTGAAGAAGGCCTGCGGGTTGTAAAGCACTTTCAGTGGGGAGGAGAGGCC

TTTGGCTAATATCCAAAGGAAGAGACGTTACCCACAGAAGAAGCACCGGCTAACTCTGTG  
CCAGCAGCCGCGGTAATACAGAGGGTGCAAGCGTTAATCGGAATTACTGGGCGTAAAGGG  
TGCGTAGGTGGTTTGATAAGTTGGGTGTGAAATTCCTGGGCTTAACCTAGGAACTGCGCT  
CAATACTGTTGAGCTAGAGTACTGTAGAGGAAGGTGGAATTTCCAGTGTAGCGGTGAAAT  
GCGTAGATATTGGAAGGAACATCAGTGGCGAAGGCGACTTTCTGGACAGATACTGACACT  
GAGGCACGAAAGCGTGGGGAGCAAACAGGATTAGAGACCCCTGTAGTCC

>Otu3093

CCAGCCTATGGGGCGCTCCAGTCGAGGATCTTCGGCAATGGGCGCAAGCCTGACCGAGCG  
ACGCCGCGTGCGGGATGAAGGCCTTCGGGTGTAAACCGCTGTCGAGGGGGATGAAGGGC  
ATCTGGGTTTACCCAGGTGTCACGCTTGACACATCCCTGGAGGAAGCACGGGCTAAGTTC  
GTGCCAGCAGCCGCGGTAAGACGAACCGTGCGAACGTTGTTTCGGATTCACTGGGCTTAAA  
GGGCGCGTAGGCGGTTTGCCAAGTCTGTGGTGAAATCTTTCGGCTTAACCGGAAAATGGC  
CATGGATACTGGTGAACCTCGAGGGAGGTAGGGGCGAGTGGGAACCTCCGGTGGAGCGGTGA  
AATGCGTTGATATCGGAAGGAACGCCGGTGGCGAAAGCGCACTGCTGGATCTCTTCTGAC  
GCTGAGGCGCGAAAGCTAGGGGAGCAAACAGGATTAGAAACCCTAGTAGTCC

>Otu3094

CCAGCCTATGGGAGGCAGCAGTGGGGAATATTGCGCAATGGGCGAAAGCCTGACGCAGCA  
ACGCTGCGTGAGTGAAGAAGGCCTTCGGGTGTAAAGCTCTTTCGGCTGGGAAGAAGGGT  
AGAAAGGTGAATAATCTTTTTATTTGATGGTACCAGAAGAAGAAGCACCGGCAAACCTTCG  
TGCCAGCAGCCGCGGTAATACGAAGGATGCGAGCGTTGTTTCGGAATTATTGGGCGTAAAG  
GGTTCGTAGGCGGGATTGTAAGTCAAGTGTGAAATCCCCGAGCTTAACTCGGGACGTGCA  
TTTGAAACTGTGATTCTTGAGTCATAGAGAGGGTGGTGGAATTGTTGGTGTAGGAGTGAC  
ATCCGTAGAGATCAACAGGAACATCAGAGGCGAAAGCGGCCACCTGGCTATGTACTGACG  
CTGAGGAACGAAAGCGTGGGGAGCAAACAGGATTAGAAACCCGGGTAGTCC

>Otu3095

CCAGCCTACGGGTCGCTCCAGTAGGGAATTTTCCACAATGGGCGAAAGCCTGATGGAGCA  
ACGCCGCGTGACAGGATGAATGCCTTAGGGTTGTAAACTGCTTTTATATGTGACGATAATG  
ACGGTAGCATATGAATAAGGATCGGCTAACTCCGTGCCAGCAGCCGCGGTCATACGGAGG  
ATCCAAGCGTTATCCGGAATTACTGGGCGTAAAGAGTTGCGTAGGTGGCAAAGTAAAGTAG  
ACAGTGAATCGTGTGGCTCAACCATACATCCATTGCCTAAACTGCTTAGCTAGAGGATG  
AGAGAGGTTATTGGAATTCCTAGTGTAGGAGTGAAATCCGTAGATATTAGGAGGAACACC  
GATGGCGTAGGCAGATAACTGGCTCATTCCTGACACTCAGGCACGAAAGCGTGGGGAGCA  
AACGGGATTAGATACCCAGTAGTCC

>Otu3097

CAGCCTATGGGTTGCTGTCAGTGGGGAATATTGGACAATGGGCGCAAGCCTGATCCAGCAA  
TGCCGCGTGAGTGATGAAGGCCTTCGGGTGTAAAGCTCTTTCGCACGCGACGATGATGA  
CGGTAGCGGAAGAAGAAGCCCCGGCTAACTTCGTGCCAGCAGCCGCGGTAATACGAGGGG  
GGCAAGCGTTGTTTCGGAATTATTGGGCGTAAAGGTGCGTAGGCGGTTTGGTAAAGTCTTT  
TGTGAAATCTACGGGCTCAACTCGTAGACTGCAAGGGAACTGCCGGGCTTGAGTATGGG  
AGAGGTGAGTGGAATTTCCGGTGTAGCGGTGAAATGCGTAGATATCGGAAGGAACACCTG  
TGGCGAAAGCGGCTCACTGGACCATAACTGACGCTGATGCACGAAAGCTAGGGGAGCAAA  
CAGGATTAGAAACCCTCGTAGTCC

>Otu3099

CCAGCCTACGGGGTGACAGCAGTGGGGAATTTTACGCAATGGGGGAAACCCTGACGTAGCG  
ACACCGCGTGAGCGAAGAAGCCCTTTGGGGTGTAAAGCTCTGTTCGGCTGGGACGAAAAAA  
ATGACGGTACCAGCAAAGGAAGCATCGGCTAACTACGTGCCAGCAGCCGCGGTAAGACGT  
AGGATGCAAGCGTTGTCCGGATTTATTGGGCGTAAAGAGTTCGTAGGCGGTTTGTAAAGT  
CTGAAGTTAAAGACTGAGGCTCAACCTCAGGACTGTTTTGGATACTGACAAACTAGAGTG  
CAATAGAGGCGAGTGGAATTTCCAGTGTAGCGGTGAAATGCGTAGATATTGGGAAGAACAC  
CCAGTGGCGAAGGCGACTCGCTGGGTGTAACTGACGCTGAGGAACGAAAGCCAGGGTAG  
CGAATGGGATTAGAAACCCTAGTAGTCC

>Otu3103

CCAGCCTATGGGTTGCAGCAGTGAGGAATATTGCTCAATGGGCGAAAGCCTGAAGCAGCG  
ACGCCGCGTGAGGGATGAAATCCGTTAGGATGTAAACCTCTTTTGGTAGGGAAGAATGTT  
CCGTTTCACGGAATTGACGGTACCTACAGAATAAGCACCGGCAAACCTACGTGCCAGCAGC  
CGCGGTAATACGTAGGGTGCAAGCGTTGTCCGGAATTACTGGGTGTAAAGGGTCCGCAGG  
CGGAAATGTAAAGTCAATGGTGAAATTCCTTCGGCTCAACCGAAGACATGCTGTGATACTA  
CATTTCTTGAGTCCGAGAGAGGATAACAGAATTCATGGTGTAGCAGTGAAATGCGTAGAG

ATCATGAAGAATACCGGTAGCGAAGGTGGTTATCTGGCTCGGTACTGACGCTCAGGGACG  
AAAGCGTGGGTAGCAAACAGGATTAGAAACCCCTGTAGTCC  
>Otu3104  
CCAGCCTATGGGGCGCAGCAGTGGGGAATATTGGACAATGGGGGCAACCCTGATCCAGCG  
ATGCCGCGTGAGTGATGAAGGCCTTCGGGTTGTAAAGCTCTTTTGTGGGGACGATGATG  
ACGGTACCCGACGAATAAGCCCCGGCTAACTTCGTGCCAGCAGCCGCGGTAATACGAAGG  
GGGCTAGCGTTGTTTCGGAATGACTGGGCGTAAAGGGCGCGTAGGCGGTTTGATAAGTTTG  
GTGTGAAAGTCCCTGGGCTTAACCTGGGGATTGCATTGGAACTGTCAGGCTAGAGGACGA  
GAGAGGAAAATGGAATTGCGAGTGTAGAGGTGAAATTCGTAGATATTGCAAGAACACCG  
GTGGCGAAGGCGGTCTTCTGGCTCGGTACTGACGCTAAGGCGCGAAAGCGTGGGGAGCAA  
ACAGGATTAGAAACCCCAGTAGTCC  
>Otu3107  
CCAGCCTATGGGTCGCAGCAGTAGGGAATTTTCCACAATGGGCGAAAGCCTGATGGAGCA  
ACGCCGCGTGCAAGGATGAATGCCTTAGGGTTGTAACTGCTTTTATCTGTGACGAATATG  
ACGGTAGCAGATGAATAAGCCTCGGCTAACTCCGTGCCAGCAGCCGCGGTCATACGGAGG  
AGGCAGGCGTTATCCGGAATTACTGGGCGTAAAGAGTTGCGTAGGTGGCAAAGTGTGTCG  
ATAGTGAAAGCGTGGGGCTCAACCTCATATCCATTATCGAACTGCTTAGCTAGAGGACG  
AGAGAGGTTATTGGAATTCCCAGTGTAGGAGTGAAATCCGTAGATATTGGGAGGAACACC  
GATGGCGTAGGCAGATAACTGGCTCGTTCCTGACACTAAGGCACGAAAGCGTGGGTAGCA  
AACGGGATTAGATACCCCCGTAGTCC  
>Otu3108  
CCAGCCTATGGGGGGCACCAGTCGCGAATCTTTCACAATGGGCGCAAGCCTGATGAAGCC  
ACGCCGCGTGCGGGATGAAGGCCCTCTGGGTTGTAAACCGCTGTCAAGTGGGGGGAAACG  
CCGGGTGTTAACAGCGCCCCGGCTTGACTGCCCCGTAAAGGAAGCCCCGGCAAACATGTG  
CCAGCAGCCGCGGTAATACATGTGGGGCAAGCGTTGTTTCGGAATTACTGGGCATAAAGGG  
TGCGTAGGTGGCTTGTTAAGTCAGGGGTGAAAGTTTTCGGCCCAACCGGAAAATGGCCTT  
TGATACTAGCGAGCTTGAGTGCGTGAGGGGTGACTGGAACGAGTGGTGTAGCGGTGAAAT  
GCGTAGATATCACTCGGAAGGCCAACGGCGAAGGCAAGTCACTGGTGCGCAACTGACACT  
GAGGCACGAAAGCGTGGGGAGCAAACAGGATTAGAAACCCCCGTAGTCC  
>Otu3109  
CCAGCCTATGGGTGGCTGCAGTCGAGGATCTTCGGCAATGGGCGCAAGCCTGACCGAGCG  
ACGCCGCGTGTCGATGAAGGCCTTCGGGTTGTAAAGCACTGTGAGGGGAAGAAAGCCG  
CAAGGTTGATCGACCCCTGGAGGAAGCACGGGCTAAGTTCGTGCCAGCAGCCGCGGTAAG  
ACGAACCGTGCGAACGTTGTTTCGGAATCACTGGGCTTAAAGGGCGCGTAGGCGGGCTGCC  
GCGTCCGGGGTGAAATCCCACGGCTCAACCGTGGAACGGCCTCGGATACGGGCGGCCCTCG  
AGGGGGGTAGGGGCATCTGGAAGTGTGAGTGGAGCGGTGAAATGCGTTGATATTACAGG  
AACTCCGGTGGCGAAGGCGAGGTGCTGGACCCCATCTGACGCTGAGGCGCGAAAGCCAGG  
GGAGCGAACGGGATTAGAAACCCCCGTAGTCC  
>Otu3111  
CCAGCCTATGGTTGCTCCAGTCGAGAATTTTCTCAATGGGCGAAAGCCTGAAGGAGCGA  
CGCCGCGTGGGGGATGAATGGCTTCGGCCCGTAAACCCCTGTCATTTGTGAACAAATTAA  
TCTACCCAACACGTGGATTATTGATAGTAACGGAAGAGGAAGGGACGGCTAACTCTGTGC  
CAGCAGCCGCGGTAATACAGAGGTCCCAAGCGTTGTTTCGGATTCAATTGGGCGTAAAGGGT  
GTGTAGGAGGTAGGGTAAGTCAGGTGTGAAATCTCAGAGCTTAACTCTGAACTGCGCTT  
GATACTGCTCTGCTAGAGGATCGGAGGGGTATCGGAATTTATGGTGTAGCAGTGAAATG  
CGTAGATATCATAAGGAACACCGGTGGCGAAGGCGGATACCTGGAAGACTCCTGACTCTG  
AAACACGAAAGCCAGGGGAGCAAACGGGATTAGATACCCAGTAGTCC  
>Otu3113  
CCAGCCTATGGGGCGCTCCAGTGGGGAATATTGGACAATGGGCGCAAGCCTGATCCAGCC  
ATGCCGCGTGAGTGTTGAAGGCCTAGGGTTGTAAAGCCCTTTCGGCGGGGAAGATAATGA  
CGGTACCCGTTAGAAGAAGCCCCGGCTAACTTCGTGCCAGCAGCCGCGGTAATACGAAGGG  
GGCTAGCGTTGCTCGGAATGACTGGGCGTAAAGGGCGCGTAGGCGGCGTGCAAAGTCAGG  
CGTGAAATTCTTGGGCTCAACCTGGGGACTGCGCTTGATACGTGCATGCTTGAGTTTGGA  
AGAGGGTTCGTGGAATTCCCAGTGTAGAGGTGAAATTCGTAGATATTGGGAAGAACACCGG  
TGGCGAAGGCGGCGACCTGGTCCCTGGACTGACGCTGAGGCGCGAAAGCGTGGGGAGCAAA  
CAGGATTAGATACCCAGTAGTCC  
>Otu3122  
CCAGCCTACGGGTCGCTCCAGTCAAGAACCTTCCACAATGGACGAAAGTCTGATGGAGCG

ACGTCGCGTGGTTGATGAAGTCCTTAGGGACGTAAAAACCTTTTGTCTGGGGAGAAAAGTTA  
TTGATAGTACCCGAAGAATAAGGGGTGCTAAACTCGTGCCAGCAGCAGCGGTAATACGA  
GTGCCCCGAGCGTTATCCGGAATTATTGGGCGTAAAGGGTGTGTAGGTGGTTGTGTTAGT  
CTCCTGTAAATCCCCGGGCTTAACCTGGGGCATGCAGGGGAAACGGCACAACCTAGAGGA  
TGCGAGGGGTGAATGGAACCTCATGGTGTAGGGGTGAAATCCGTTGATATCATGGGGAACA  
CCAAAAGCGAAGGCAATTCCTGACACTGAAACACGAAAGCGTGGGTAG  
CGAATGGGATTAGAAACCCAGTAGTCC

>Otu3125

CCAGCCTACGGGTCGCTGCAGTGGGGAATATTGCGCAATGGGCGAAAGCCTGACGCAGCG  
ACGCCGCGTGAAGGATGAAGGTCCTTCGGATCGTAAACTTCTGTAAAGTGGGAAGAAAGAC  
CGCTCTCTAATATGGAGCGGGGATGACGGTACCCTAGAGAAAGCACCGGCTAACTTCGT  
GCCAGCAGCCGCGTAATACGAAGGGTGCAAACGTTATTTCGGAATCACTGGGCGTAAAGG  
GTGTGTAGACGGCATACTAAGTTCGTTGTTTAACTCTTCGGCCTAACCGGAAGCTCGCGA  
TGAAAACCTAGTAAGCTTGAGGATGGAAGAGAGAAGTGGAAATCTCGGAGTAGCGGTAAAA  
TGCGTAGATCTCGAGAGGAACACCGATGGCGAAGGCAGCTTCTTGGTCCACTCCTGACGT  
TGAGACACGAAAGCGTGGGTAGCAAACAGGATTAGATACCCGCGTAGTCC

>Otu3128

CCAGCCTACGGGAGGCTGCAGTGGGGAATATTGGACAATGGGCGAAAGCCTGACGCAGCA  
ACGCCGCGTGGGGGATGAAGGCCTTCGGGTGTAAACTCCTTTTAGTGGGAACGAAATTG  
ACGGTACCCACAGAATAAGCCCCGGCCAACTACGTGCCAGCAGCCGCGGTGATACGTAGG  
GGGCGAGCGTTGTCCGGATTCATTGGGCGTAAAGAGCTCGTAGGCGGTTCCGTAAGTCGG  
GTGTGAAACCTCCAGGCTCAACTTGGAGACGCCACTCGATACTGCTGTGACTCGAGTCCG  
GTAGGGGACCACGGAATTCCTGGTGTAGCGGTGAAATGCGCAGATATCAGGAGGAACACC  
AGTAGCGAAGGCGGTGGTCTGGGCCGGCACTGACGCTGAGGAGCGAAAGCGTGGGGAGCG  
AGCAGGATTAGATACCCCTGTAGTCC

>Otu3129

CCAGCCTATGGGTGGCTGCAGTGAGGAATATTCCGCAATGGGCGCAAGCCTGACGGAGTG  
ATGTCGCGTGAGTGATGAAGGCCTTCGGGTGTAAAGCTCTTTGGATAGGGAGTAAGAAA  
ACTCGGATAACATCCGGGTAATTTGACAGTACTTATACAACAAGCACCGGCTAACCCCGT  
GCCAGCAGCTGCGGTAATACGGGGGGTGCAAGCGTTGATCGGATTGACTGGGCGTAAAGG  
GAGCGTAGGCGGTGCAATAAGTCAGTTGTGAAATTCGGGGGCTCAACCCCGGAGCTGCGA  
CTGAAACTATTTGACTAGAGGGTGGTAGGGGAAAACAGAATTCTGCATGTAGCGGTGAAA  
TGCGTAGATATGCAGAGGAATACCGGTGGCGAAGGCGGTTTTCTGTACCATTCTGACGC  
TGAGGCTCGAAGGTGTGGGGAGCAAACAGGATTAGAGACCCCTGTAGTCC

>Otu3130

CCAGCCTATGGGACGCACCAGGTGTAAAAACCATGTGGACTCCGAGTTTCTTTAAAGAAA  
TGATATCATCCTCCGGAATAATTCCGCCTACAATAAAGAGGACGTCAGTCAGTCCTTCTT  
TGTGGACTCCTTCGATAATATCAGGCACGAGTGCCTTGTGCGCACCTGACAAAATACTGA  
GCCAATCACGTGAACGTCCTCTTGAATGGCCGCATTGATCACCATTTCTGGGGTTTGGT  
GTAAGCCAGTATAAATGACCTCAAATCCAGCATCGCGTAGTGCGCGCGCTATGACCTTTG  
CTCCTCGATCATGCCCATCCAGGCCAGGTTTTGCGACAAGGACACGTATCATGCCTTTAT  
TATTTAGGGCTTTGTGCTTGTACCAGGTGTTATAATAGAGGATTGAGTAACGGACATAA  
TTAGAGACCCGCGTAGTCC

>Otu3132

CCAGCCTACGGGTTGCAGCAGACGAGAATATTGCAATGGGCGAAAGCCTGATCGAGCG  
ACGCCGCGTGCAGGATGAAGTTCCTTCGGGGTGTAAACTGCTTTTATGAGCGAGAAAGTTT  
ATTGATCAGCTCATGAATAAGAGGTTGCTAAACTCGTGCCAGCAGCAGCGGTAATACGAG  
TGCTCAAGCGTTATCCGGAATCATTGGGCGTAAAGGGTGTGTAGGTGGCCGCGTTAGTC  
TTCCGTTAAATTCCTCCGACTCAATCGGAGTACTGCGGGGAAACGGCGCGGCTTGAGGAT  
GCGAGAGGTCTGTGGAACCTCATAGTGTAGCGGTGAAATGCGTTGATATTATGGGGAACAC  
CAAAAGCGAAGGCAGCAGACTGGAGCACTCCTGACACTGAAACACGAAAGCGTGGGTAGC  
GAACGGGATTAGAGACCCTCGTAGTCC

>Otu3134

CCAGCCTACGGGTGGCAGCAGTCGAGAATTTTTCACAATGGGGGAAACCCTGATGGAGCG  
ACGCCGCGTGGAGGATGAAGGTTTTTCGGATTGTAAACTCCTGTCACTGCAGAACAAGGGT  
GCGTTTGTGAACAGCAAACGCATTTGATGGTATGCGGAGAGGAAGGGACGGCTAACTCTG  
TGCCAGCAGCCGCGGTAAGACAGAGGTCCCGAGCGTTGTTCGGATTTCATTGGGCGTAAAG  
GGTGTGTAGGAGGTGGGTAAGTCAGGTGTGAAATCTCAGAGCTTAACTCTGAAACTGCG

CTTGATACTGCTCGGCTAGAGGATCGGAGGGGGTATCGGAATTTATGGTGTAGCAGTGAA  
ATGCGTAGATATCATAAGGAACACCGGTGGCGAAGGCGGTGATCTGGGCCAATACTGACG  
CTGAGGAGCGAAAGCGTGGGGAGCGAACAGGATTAGAGACCCCTGTAGTCC

>Otu3135

CCAGCCTACGGGGCGCTGCAGTGGGGAATATTGGACAATGGGGGCAACCCTGATCCAGCC  
ATGCCGCGTGGGTGAAGAAGGCCTTCGGGTGTAAAGCCCTTTTGTACGGGAAGAAAAGC  
TGCGGGTGAATACTCCGTGGTCATGACGGTACCGTAAGAATAGGCACCGGCTAACTTCGT  
GCCAGCAGCCGCGGTAATACGAAGGGTGCAAGCGTTACTCGGAATTACTGGGCGTAAAGC  
GTGCGTAGGCGGTGGTTTAAAGTCTGATGTGAAATCCCCGGGCTCAACCTGGGAATGGCAT  
TGGATACTGGACCGCTAGAGTACGGTAGAGGGTGGTGGAATTCCTGGGTGTAGCAGTGAAA  
TGCGTAGAGATCGGGAGGAACATCTGTGGTGAAGGCGGCCACCTGGACCAGTACTGACGC  
TGAGGCACGAAAGCGTGGGGAGCAAACAGGATTAGATAACCCCTGTAGTCC

>Otu3136

CCAGCCTATGGGTGCGACCAAGTGAAGGAATATTGCGCAATGGGGCGAAAGCCTGACGCAGCG  
ACGCCGCGTGGAGGATGAAGGTCTTAGGATTGTAAACTTCTGTAAAGTGGGAAGAAAAGC  
CTGTCTCTAATACAGACGGGGGATGACGGTACCATTAAAGAAAGCACCGGCTAATCTCGT  
GCCAGCAGCCGCGGTAATACGAGAGGTGCAAGCGTTATTCGGAATTATTGGGCGTAAAGG  
GTGCGTAGGCGGTATATTAAGTCAACTGTAAATTTTCCGGCTCAACCGGAAGCAGGCGG  
TAGATACCGGTATGCTAGAGGGTGAAAGAGAGGAGTGGAATTCTCGGAGTAGCGGTAAAA  
TGCGTAGATCTCGAGAGGAACACCAATGGCGAAGGCAGCTCCTTGGTTCACCTTCTGACGC  
TGATGCACGAAAGCGTGGGGAGCAAACAGGATTAGAGACCCCTGTAGTCC

>Otu3141

CCAGCCTATGGGGGGCACCAGTCGAGAATCTTTCGCAATGGGGCGAAAGCCTGACGAAGCG  
ACGCCGTGTGTGCGATGAAGGCCTTCGGGTGTAAAGCACTTTCGCTTGGGAACAAGAGA  
AGCCGGCTAATATCCGGCAAATTTGAGTGTACCAGGTAAAGAAGCACCGGCTAACTACGT  
GCCAGCAGCTGCGGTAATACGTAGGGTGCAAGCATTAATCGGATTTATTGGGCGTAAAGG  
GCGCGTAGGCGGGGTGATAAGTCAGATGTGAAAGCCCCGGGGCTCAACCCCGGAAGTGCAT  
TTGAAACTGTCACTCTTGAGGGTAGGCGGAGAAAATGGAATTCACAAAGTAGCGGTGAAA  
TGCGTAGATATGTGGAAGAACACCAAGTGGCGAAGGCGGTTTTCTAGCTTATACCTGACGC  
TGAGGCGCGAAAGCAAGGGGAGCAAACAGGATTAGATAACCCAGTAGTCC

>Otu3143

CCAGCCTATGGGATGCACCAGTGGGGAATATTGGACAATGGGGCGAAAGCCTGATCCAGCA  
ATACCGAGTGAGTGATGAAGGCCTTAGGGTTGTAAAGCTCTTTTCAGCAGGGAAGATAAT  
GACGGTACCTGACCAAGAAAGCCCCGGCTAACTCCGTGCCAGCAGCCGCGGTAAGACGGA  
GGGGGCTAGCGTTGTTTCGGAATTACTGGGCGTAAAGAGTGCGTAGGCGGTTTAGTAAGTT  
GGAAGTGAAAGCCCCGAGGCTTAACCTCGGAAGTGTCTTCAAACCTATTAATCTAGAGTGT  
AGTAGGGGATGATGGAATTCCTAGTGTAGAGGTGAAATTCCTAGATATTAGGAGGAACAC  
CGGTGGCGAAGGCGGTTCATCTGGGCTACAACCTGACGCTGATGCACGAAAGCGTGGGGAGC  
AAACAGGATTAGAAACCCGAGTAGTCC

>Otu3145

CCAGCCTATGGGGGGCAGCAGTGGGGAGTATTGGACAATGGGGGCAACCCTGATCCAGCC  
ATGCCGCGTGAGTGATGAAGGCCTTCGGGTGTAAAGCTCTTTTGGTGGGGACGATGATG  
ACGGTACCCACAGAATAAGCTCCGGCTAACTTCGTGCCAGCAGCCGCGGTAATACGAAGG  
GAGCTAGCGTTGTTTCGAGTTACTGGGCGTAAAGGGCGCGTAGGTGGCTTAGTAAGTTAG  
GTGTGAAAGCCCAGGGCTCAACCCTGGAATAGCACTTAAGACTGCTTCGCTTGAATTCGG  
TAGAGGTGAGTGGAATTCCTAGTGTAGAGGTGAAATTCGTAGAGATTGGGAAGAACACCC  
GTGGCGAAGGCGGCTCACTGGACCGACATTGACACTGAGGCGCGAAAGCGTGGGGATCAA  
ACAGGATTAGAAACCCCTAGTAGTCC

>Otu3147

CCAGCCTACGGGTCGCTGCAGTGGGGAATATTGGACAATGGGGCGCAAGCCTGATCCAGCA  
ATGCCGCGTGTGTGAAGAAGGCCTGCGGGTTGTAAAGCACTTTCGGTGGGGAGGAAGGCC  
TTAGTGTGAATATCACTGAGGATTGACGTTACCCACAGAAGAAGCACCGGCTAACTCTGT  
GCCAGCAGCCGCGGTAATACAGAGGGTGCGAGCGTTAATCGGAATTACTGGGCGTAAAGG  
GTGCGTAGGTGGTTAATTAAGTCAGATGTGAAATCCCAAGGCTTAACCTTGGAATGGCAT  
TTGATACTGGTTGGCTAGAGTACAGAAGAGGGAAGTGGAATTTCCGGTGTAGCGGTGAAA  
TGCGTAGATATCGGAAGGAACATCAGCGGCGAAGGCGACTTCCTGGTCTGTTACTGACAC  
TGAGGCACGAAAGCGTGGGGAGCGAACAGGATTAGAAACCCAGTAGTCC

>Otu3148

CCAGCCTACGGGTTGCTCCAGTGGGGAATCTTGCGCAATGGGCGAAAGCCTGACGCAGCA  
ACGCCGCGTGGGGGATGAAGGCTCTCGGGTTGTAAACCCCTTTCAGCAGGAACGAAAACA  
GACGGTACCTGCGGAAGAAGCCCCGGCCAACTACGTGCCAGCAGCCGCGGTGATACGTAG  
GGGCGAGCGTTGTCCGATTATTGGGCGTAAAGAGCTCGTAGGCGGCTCGGTAAAGTCG  
GGTGTGAAACCTCCAGGCTCAACCTGGAGATGCCACTCGATACTGCCATGGCTAGAGTCC  
GGTAGGGGACCACGGAATTCCTGGTGTAGCGGTGAAATGCGCAGATATCAGGAGGAACAC  
CGGTGGCGAAGGCGGTGGTCTGGGCCGGAAGTACGCTGAGGAGCGAAAGCGTGGGGAGC  
GAACAGGATTAGATACCCCAGTAGTCC

>Otu3149

CCAGCCTATGGGACGCACCAGTCGAGAATCATTCGCAATGGGCGAAAGCCTGACGAAGCG  
ACGCCGTGTGTGCGATGAAGGCCTTCGGGTGTAAAGCACTTTCGCCTGGGAACAAGGGA  
AGCCGGCTAATATCCGGCAGACTTGAGGGTACCAGGTAAAGAAGCACCGGCTAACTACGT  
GCCAGCAGCTGCGGTAATACGTAGGGTGCAGCATTAATCGGATTTATTGGGCGTAAAGG  
GCGCGTAGGCGGGGATAAAAAGTCATATGTGAAATCCCGGGGCTCAACCTCGGAACGGCAT  
ATGAAACTCTATCTCTAGAGGGTAGGCGGAGAAAATGGAATTCACAAAGTAGCGGTGAAA  
TGCGTAGATATGTGGAAGAACACCAGTGGCGAAGGCGGTTTTCTAGCTTATACCTGACGC  
TGATGCGCGAAAGCAAGGGGATCAAACAGGATTAGATACCCCGGTAGTCC

>Otu3150

CCAGCCTACGGGAGGCAGCAGTAAGGGATATTGCGCAATGGGCGAAAGCCTGACGCAGCA  
ACGCCGCGTGGAGGAAGAAGGCCTTCGGGTGTAAACTTCTTTTGGGGCTGACGAGGAAG  
GACGGTAAGCCCCGAATAAGTCACGGCTAACTACGTGCCAGCAGCCGCGGTAACACGTAG  
GTGGCGAGCGTTATCCGGATTACTGGGCGTAAAGCGTGTGCAGACGGGGTTACAAGTGG  
TGTATGAAATTTCCCAGCTTAACCTGGGAGGGGTTATGCCAGACTGTAGCTCTAGAGAACG  
GGAGAGGGACGTGGGATTCCGGGTGTAGTGGTGAATGCGTAGAGATCCGGAGGAACCCC  
CGAGGCGAAGGCGGCGTCTCGGCCGTTCTGACGTTACAGACACGACAGCATGGGGAGCG  
AACGGGATTAGAAACCCAGTAGTCC

>Otu3151

CCAGCTATGGGTGGCACCAGTGGGGAATATTGGACAATGGGCGCAAGCCTGATCCAGCAA  
TGCCGCGTGAGTGAAGAAGGTCTTCGGATTGTAAAGCTCTTTCGACGGGGACGATGATGA  
CGGTACCCGCTAGAAGAAGCCCCGGCTAACTTCGTGCCAGCAGCCGCGGTAATACGAAGGG  
GGCTAGCGTTGCTCGGAATGACTGGGCGTAAAGGGCGCGTAGGCGGCGATGATAGTCAGG  
CGTGAAATTCCTGGGCTCAACCTGGGGACTGCGCTTGATACGTTATTGCTAGAGTTAGGA  
AGAGGGTTCGTGGAATTTCCAGTGCAGAGGTGAAATTCGTAGATATTGGGAAGAACACCGG  
TGCGCAAGGCGGCGACCTGGTCCTTGACTGGCGCTGAGGCGCGAAAGCGTGGGGAGCAAA  
CAGGATTAGAAACCCTAGTAGTCC

>Otu3158

CCAGCCTATGGGTGGCTGCAGTCAGGAATATTGCGCAATGGAGGAACTCTGACGCAGCG  
ACGCCGCGTGGGTGATGAAGGCCTTCGGGTGCTAAAGCCCCGTCGGAGGGGAAGAAAAGT  
CTGTTGGCTAATATCCAGCGGACCTTTGACGGTACCCTCAAAGGAAGCACCGGCTAACTC  
CGTGCCAGCAGCCGCGGTAAGACGGAGGGTGCAGCGTGTTCGGATTGACTGGGCGTAA  
AGGGCGTGTAGGCGGTTGGTTAAGTCGGGTGTGAAAGCCTGGGGCTCAGCCCCAGAAGTG  
CATCCGAAACTAGCCAGCTAGAGCGCGATAGAGGAGGGTGAATTCCTGGTGTAGCGGTG  
AAATGCGTAGATATCAGGAGGAACACCGGCGGCGAAGGCGGCCCTCTGGATCGTTGCTGA  
CGCTGAGACGCGAAAGCGTGGGAGCGAACAGGATTAGAGACCCTTGTAGTCC

>Otu3160

CCAGCCTACGGGGTGCAGCAGTGAGGAATTTTCCGCAATGGGCGAAAGCCTGACGGAGCG  
ACGCCGCGTGTGGGAAGAAGGCCTCCGGGTGCTAAACCACTGTCGAAGGGGACTATACTG  
AAGGTACCCTTGAGGAAGCCCCGGCTAACTACGTGCCAGCAGCCGCGGTAAGACGTAGG  
GGGCAAGCGTTATTTCGGATTTATTGGGCGTAAAGCGCTCGTAGGCGGGAGGTCAAGTCCG  
TGAAGAAAGACCTGGGCTCAACTCAGGGAACGGCACGGATACTGGCTTTCTTGAGGCATT  
CAGAGGGTGTATGGAATTCCTGGTGTAGCGGTGAAATGCGTAGACATCGGGAGGAACACCA  
GTGGCGAAGGCGATCACCTGGGGATGTTCTGACGCTGAGGAGCGAAAGCTAGGGGAGCAA  
ACGGGATTAGAGACCCGGGTAGTCC

>Otu3168

CCAGCCTATGGGGGGCTGCAGTGGGGAATCTTGCAATGGAGGAACTCTGATGCAGCG  
ACGCCGCGTGAGCGATGAAGCCCTTCGGGGTGTAAAGCTCTTTCGACGGGAACGATAATG  
ACGGTACCCACAGAAGAAGCCCCGGCTAACTACGTGCCAGCAGCCGCGGTGATACGTAGG  
GGGCGAGCGTTGTCCGATTTACTGGGCGTAAAGAGCTCGTAGGCGGTTTGATAAGTCGG

GTGTGAAACCTCCAGGCTCAACCTGGAGTCGCCACTTGATACTGTCATGACTAGAGTCCG  
GTAGGGGACCATGGAATTCCTGGTGTAGCGGTGAAATGCGCAGATATCAGGAGGAACACC  
AGTAGCGAAGGCGGTGGTCTGGGCCGGTACTGACGCTGAGGAGCGAAAGCGTGGGGAGCG  
AACAGGATTAGATACCCTCGTAGTCC

>Otu3170

CCAGCCTATGGGAGGCTCCAGTGGGGAATATTGCACAATGGGCGAAAGCCTGATGCAGCG  
ACGCCGCGTGAGGATGACGGTCTTCGGATTGTAACTCCTGTAAAGTGGGAAGAAAGAT  
TCATACCTAATACGTATGGAGGATGACGGTACCCTAGAGAAAGCACCGGCAAACCTTCGT  
GCCAGCAGCCGCGTAATACGAAGGGTGCGAGCGTTATTTCGGAATAACTGGGCGTAAAGA  
GCGTGTCGGCGGTTTTCTTAAGTCATCTGTAAAGAACTCGGCTCAACCGAGTGCCTGCGG  
GTGAAACTGGGAGACTAGAGTGCAGAGAGAAAGGGTAGAATTCTCGGAGTAGCGGTAAAA  
TGCGTAGATCTCGAGAGGAATACCGGTTGCGAAGGCGGCCCTTTGGCTCGTAACTGACGC  
TTAAGCGCGAAAGCGTGGGGAGCAAACAGGATTAGAAACCCGAGTAGTCC

>Otu3174

CCAGCCACGGGTGCGCAGCAGTGGGGAATATTGGACAATGGGGGCAACCCTGATCCAGCA  
ATGCCGTGTGTGTGAAGAAGGCCTTCGGGTTGTAAAGCACTTTTAGTGGGAAAGAAAAGC  
TTAAGGGTAATATCCTTAAGCCTTGACGTTACCCACAGAAAAAGCACTGGCTAACTCTGT  
GCCAGCAGCCGCGTAATACAGAGAGTGCAAGCGTTAATCGGAATTACTGGGCGTAAAGC  
GCACGTAGGTGGATATTTAAGTCGGATGTGAAATCCCTGAGCTTAAGTTAGGAATTGCAT  
TCGATACTGGATGTCTAGAGTATAGTAGAGGGAAGTGGAAATTTCCGGTGTAGCGGTGAAA  
TGCGTAGATATCGGAAGGAACATCAGTGGCGAAAGCGGCTTCCTGGACTAATACTGACAC  
TTAGGTGCGAAAGCGTGGGGAGCAAACAGGATTAGATAACCCAGTAGTCC

>Otu3175

CCAGCCTATGGGTTGCTGCAGTTAGGAATCTTGACAATGGGGGAAACCCTGATGCAGCG  
ACGCCACGTGGAGGACGAAGGGTCTAGGCTCGTAAACTCCTTTTATCGGGAAAGACTTAG  
GACGGTACCCGATGAATAAGCACCGGCTAACTACGTGCCAGCAGCCGCGTAAGACGTAG  
GGTGCAAGCGTTGTCCGGATTTACTGGGCGTAAAGAGCGCGTAGGCGGTCTGTTAAGTGT  
AAAGTGAATCTCCAGGGCTCAACCCGGAAATTGCTTTGCATACTGGCAGGCTAGAGGGT  
TGCAGAGGTTTGTGGAATTCCTGGTGTAGCGGTGAAATACGTAGATATCGGGAGGAACAC  
CCATGGCGAAGGCAGCAAACCTGGGCAACATCTGACGCTGAGGCGCGAAAGCGTGGGTAGC  
AAACAGGATTAGAACCCTTG TAGTCC

>Otu3186

CCAGCCTATGGGTGCGCAGCAGTCGAGGATCTTCCGCAATGGGCGCAAGCCTGACGGAGCG  
ACGCCGCGTGTGGGATGAAGGCCTTCGGGTTGTAAACCACTGTCACCGGTTATGAAAGGA  
TCTGGTGTAAACAGCATCAGGGACTGACAAAGGCCGGAGAGGAAGCCACGGCTAACTTCG  
TACCAGCAGCCGCGTAAGACGAAGGTGGCGAGCGTTGTTTCAAGTCACTGGGCATAAAG  
CGCACGTAGGCGGCGACGTAAGTTGGGTGTGAAATCCCTCGGCCTAACTGAGGAACTGCG  
CCCAGTACTGCGTTGCTTGAGGATCAAAGGGGTGCATGGAATTCCTGGTGGAGCGGTGAA  
ATGCGTTGATATCGGGAGGAACTCCGGCGGCGAAAGCGGTGCACTGGTTGATTTCTGACG  
CTGAGGTGCGAAAGCCAGGGGAGCAAACGGGATTAGATAACCCCGTAGTCC

>Otu3188

CCAGCCTATGGGTGCGTGCAGTGGGGAATTTTGCAGTGGGGGAAACCCTGACGCAGCA  
ACGCCGCGTGAGGATGCAGTCCCTTGGGACGTAAACTCCTTTTCGATCGGGACGATTATG  
ACGGTACCGGAAGAAGAAGCCCCGGCTAACTTCGTGCCAGCAGCCGCGGTAATACGAGGG  
GGGCGAGCGTTGTTTCGGAATTACTGGGCGTAAAGGGTTTCGTAGGCGGGAATGCAAGTCAA  
GTGTGAAATCCCCAGGCTCAACCTGGGACGTGCATTTGAGACTGTGTTTCTTGAGTTTCG  
GAGAGGGTGGTGGAATTGCTGGTGTAGGAGTGACATCCGTAGAGATCAGCAGGAACACCG  
GAGGCGAAGGCGACCACCTGGCCGAATACTGACGCTGAGGAACGAAAGCGTGGGGAGCAA  
ACAGGATTAGAAACCCTAGTAGTCC

>Otu3192

CCAGCCTATGGGGGGCAGCAGTAGGGAATCTTCCGCAATGGGCGCAAGCCTGACGGAGCG  
ACGCCGCGTGAGTGAAGACGGCCCTTGGGTTGTAAAGCTCTGTTTCATCGGGAAGAAGATC  
TGACGGTACCGATGAAGAAAGCCCCGGCTAACTACGTGCCAGCAGCCGCGGTAATACGTA  
GGGGGCAAGCGTTGTCCGGAATGATTGGGCGTAAAGGGCGCGTAGGCGGATACATAAGTC  
GGGCGTGAAAGGCACGGGCTCAACCCGTGTAAGCGTTTCGAAACGGTGTATCTTGAGTGCG  
GTAGAGGAAAGCGGAATTTCTGGTGTAGCGGTGGAATGCGTAGAGATCAGAAGGAACACC  
GGTGGCGAAGGCGGCTTCCTGGACTGTAAGTACGCTGAGGCGCGAAGGCGTGGGGAGCAA  
AACAGGATTAGAGACCCTAGTAGTCC



>Otu3195

CCAGCCTATGGGGGGCAGCAGTGGGGAATATTGGACAATGGGCGCAAGCCTGATCCAGCC  
ATGCCGCGTGAGTGATGACGGCCTTAGGGTTGTAAAGTTCTTTTGACAGGGAAGATGATG  
ACTGTACCTGTAGAATAAGCACCGGCTAACTTCGTGCCAGCAGCCGCGGTAATACGAAGG  
GTGCTAGCGTTGTTCCGAATTACTGGGCGTAAAGGGCGCGTAGGCGGGTTGACAAGTTGG  
ATGTGAAAGCCCAGGGCTCAACCCTGGAATTGCATTCAAGACTGTCTTTCTTGAATTCGG  
TAGAGGTTGGTAGAATTCCAGTGTAGAGGTGAAATTCGTAGAGATTGGGAAGAATACCC  
GTGGCGAAGGCGACCAACTGGACCGACATTGACGCTGAGGCGCGAAAGCGTGGGGATCAA  
ACAGGATTAGAGACCCCCGTAGTCC

>Otu3197

CCAGCCTATGGGGCGCTGCAGTGGGGAATCTTGACACAATGGGGGCAACCCTGATGCAGCG  
ACGCCGCGTGAGGATGAAGGATCTAGGTCTGTAAACTCCTTTTGTGGGAAAGACTTAG  
GACGGTACCCAACGAATAAGCACCGGCTAACTACGTGCCAGCAGCCGCGGTAAGACGTAG  
GGTGCAAGCGTTGTCCGGATTTACTGGGCGTAAAGAGCGCGTAGGCGGGCTTGTTAAGTGT  
GAAGTTAAATCTCCAGGCTCAACCTGGAAACCATTTCGCATACTGGCGAGCTGGAGGGAT  
GGAGAGGTTAGTGGAATTCCTGGTGTAGCGGTGAAATGCGTAGATATCAGGAGGAACACC  
CATGGCGAAGGCAGCTAACTGGCCATTTTCTGACGCTGAGGCGCGAAAGCGTGGGTAGCA  
AACAGGATTAGATACCCTCGTAGTCC

>Otu3199

CCAGCCTACGGGTGGCAGCAGTCGAGAATCTTCGGCAATGGGCGCAAGCCTGACCGAGCG  
ACGCCGCGTGAGGATGAAGGCCTTCGGGTGTAAAGCACTGTCGAGGGGGAGGAAGCTC  
CGCAAGGGGTTGACCTATCCCTGGAGGAAGCACGGGCTAAATTCGTGCCAGCAGCCGCGG  
TAATACGAATCGTGCAACGTTGTTCCGAATCACTGGGCTTAAAGGGCGCGTAGGCGGTC  
AATCAAGTCCGGGGTGAAATCTTTCGGCTTAACCGGAAAAGTGCCTTGGAATACTGATTGG  
CTGGAGGGAGGCAGGGGCGAGCTGGAACCTCCAGTGGAGCGGTGAAATGCGTTGATATTGG  
AAGGAACTCCGGTGGCGAAAGCGAGCTGCTGGTCCTCTTCTGACGCTGATGCGCGGAAGC  
TAGGGGAGCAAACGGGATTAGAGACCCGTGTAGTCC

>Otu3200

CCAGCCTACGGGATGCAGCAGTCGAGGATCTTCGGCAATGGGCGCAAGCCTGACCGAGCG  
ACGCCGCGTGTCGATGAAGGCCTTCGGGTGTAAAGCACTGTCGAGGGGGAGAAAAGCC  
CGAAAGGGTTTGATCTATCCCTGGAGGAAGCACGGGCTAAGTTCGTGCCAGCAGCCGCGG  
TAAGACGAACCGTGCGAACGTTGTTCCGAATCACTGGGCTTAAAGGGCGCGTAGGCGGGC  
TGCCAAGTCTGTGGTGAAATCCCGCGGCTCAACCGTGGAACCTGCCTTAGATACTGGCGGC  
CTCGAGGGAGGTAGGGGCGAGCGGAACCTGTGAGTGGAGCGGTGAAATGTGTTGATATTCA  
CAGGAACTCCGGTGGCGAAGGCGGCTCGCTGGCCCTCTTCTGACGCTGAGGCGCGAAAGC  
CAGGGGAGCAAACGGGATTAGAAACCCTAGTAGTCC

>Otu3201

CCAGCCTATGGGTCGCAGCAGTTGGGAATTTTGACACAATGGACGAAAGTCTGATGCAGCG  
ACGCCGCGTGAGGATGAAGGTCTTCGGATTGTAAACTCCTTTTACTTGGAATAATTTT  
TTGAAGGTACCAAGTGAATAAGCACCGGCTAACTCCGTGCCAGCAGCCGCGGTAATACGG  
AGGGTGCAAACGTTGTCCGGAATTACTGGGCGTAAAGCGCATGTAGGTGGCTTTGTAAAGT  
CAGCGATCAAAGACCGACGCTTAACGTCGGGACCGTTGCTGATACTGCAAGGCTAGAGGA  
AAACAGGGGTACGCGGAACCTTAGGTGTAGGAGTGAAATCCGTAGATATCTAAAGGAACA  
CCAATGGCGAAGGCAGCGTACTGGGTTTTATCTGACACTAAGATGCGAAAGCGTGGGGAG  
CAAACGGGATTAGAGACCCTAGTAGTCC

>Otu3203

CCAGCCTATGGGTGGCAGCAGTGGGGAATATTGGACAATGGGGGAAACCCTGATCCAGCG  
ACGCCGCGTGTCGTAAGAAGGCCTGCGGGTTGTAAAGCACTTTTAGTGGGGACAAAAGC  
CATGGACTAATACTCTGTGGTCTTGATTTAACCCAAAGAAAAAGCACCGGCTAACTCTGT  
GCCAGCAGCCGCGGTAATACAGAGGGTGCGAGCGTTAATCGGAATTACTGGGCGTAAAGC  
GCGCGTAGACGGTTTTGTAAAGTCAGATGTGAAATCCCTGGGCTCAACCTAGGAACTGCAT  
TTGAGACTGCATGGCTAGAGTATCGAAGAGGGAAGTGGAATTTCCGGTGTAGCGGTGAAA  
TGCGCAGATATCAGGAGGAACACCGGTGGTGTAAACGGCTTACTGGACGATAACTGACGC  
TGATGCACGAAAGCGTGGGTAGCAAACAGGATTAGAAACCCAGTAGTCC

>Otu3204

CCAGCCTATGGGGCGCAGCAGTGGGGAATATTGGACAATGGGGGCAACCCTGATCCAGCA  
ATGCCGCGTGTCGTAAGAAGGCCTTCGGGTGTAAAGCACTTTAGGCGAGGAGGAAGGTA  
TAGTGTTTAAAGAGATGCTATGCTTGACTGTACTCGCAGAATAAGCACCGGCTAACTCTGT

GCCAGCAGCCGCGGTAATACAGAGGGTGCAGAGCGTTAATCGGAATTACTGGGCGTAAAGG  
GCGCGTAGGCGGTATTATTTAAGTTAGATGTGAAATCCCTGGGCTTAACCTAGGAACTGCAT  
CTAAGACTGGATGACTAGAGTATGGCAGAGGGTAGTGGAATTTCCGGTGTAGCGGTGAAA  
TGCGTAGAGATCGGAAGGAACACCAGTGGCGAAGGCGGCTACCTGGGCTACTACTGACGC  
TGAGGCGCGAAAGCGTGGGGAGCAAACAGGATTAGATACCCCTCGTAGTCC

>Otu3205

CCAGCCTACGGGGTGCAGCAGTGGGGAATTTTGCGCAATGGGGGAAACCCTGACGCAGCA  
ACGCCGCGTGGAGGATGAAATCCCTTGGGATGTAAACTCCTTTTCGATCGGGACGATTATG  
ACGGTACCGGAAGAAGAAGCCCCGGCTAACTTCGTGCCAGCAGCCGCGGTAATACGAGGG  
GGGCAAGCGTTGTTTCGGAATTATTGGGCGTAAAGGGTGCCTAGGCGGTGCCACAAGTCAC  
TTGTGAAATCCCCAGGCTTAACCTGGGGCTGCAGGCGAAACTGTGGTGCTGGAGTATGG  
GAGAGGTGCGTGGAATTCCTGGTGTAGCGGTGAAATGCGTAGATATCGGGAGGAACACCT  
GTGGCGAAAGCGGCGCACTGGACCATAACTGACGCTGAGGCGCGAAAGCTAGGGGAGCAA  
ACAGGATTAGATACCCGAGTAGTCC

>Otu3208

CCAGCCTATGGGAGGCTGCAGTGGGGAATATTGGACAATGGGGGCAACCCTGATCCAGCC  
ATGCCGCGTGCAGGAAGAAGGCGTTATGCGTTGTAAACTGCTTTTGATTGGGAATAAAAA  
GACCCTGCGGGGTAAATTGAATGTACCAATAGGATAAGCCACGGCTAACTACGTGCCAGC  
AGCCGCGGTAATACGTAGGTGGCAAGCGTTATCCGGATTATTGGGTTTAAAGGGAGCGT  
AGGCGGTTTTGTAAAGTCAGTGGTGAAGACGGTCGCTCAACGATCGCATTGCCATTGATA  
CCGCAAAGCTAGAGTACAGTATAGGTGGGCGGAATTTATGGTGTAGCGGTGAAATGCTTA  
GATACCATAAAGAACACCGATTGCGTAGGCAGCTCACTGGACTGTAACCTGACGCTGAGGC  
TCGAAAGTGTGGGTATCAAACAGGATTAGAGACCCAGTAGTCC

>Otu3210

CCAGCCTACGGGGTGCTGCAGTAGGGAATATTGCTCAATGGGGGAAACCCTGAAGCAGCA  
ACGCCGCGTGAGTGATGAAGGCCTTCGGGTCGTAAAGCTCTGTTGTACGGGACGAATGCG  
GCTAGAGATAACATTTCTAGCCAGTGACAGTACTGTATAAGAAAGGACAGGCTAACTTCG  
TGCCAGCAGCCGCGGTAAGACGGGGGGTCCAAGCGTTGTTTCGGAATTATTGGGCGTAAAG  
CGTGTGTAGGCGGTGTTGTAAAGTTGGATGTGAAAGCCCCGAGCTTAACTTGGGAAGTGCA  
TTCAAACTACAAAACCTTGAGTATGGAAGAGGGTTCGTGGAATTCCTGGTGTAGTGGTGAA  
ATACGTAGATATCAGGAGGAACACCGGCGGCGAAGGCGGCGACCTGGTCCTATACTGACA  
CTCAAACACGAAAGCGTGGGGATCAAACGGGATTAGAGACCCGCGTAGTCC

>Otu3211

CCAGCCTACGGGGGGCAGCAGTGGGGAATATTGCACAATGGACGAAAGTCTGATGCAGCG  
ACGCCGCGTGGAGGATGAAGGTTTTTCGGATTGTAAACTTCTGTAAAGTGGGAAGAAAGAC  
TTTTACCTAATACGTAAAGGGGATGACGGTACCCTAGAGAAAGCGCCGGCAAACCTTCGT  
GCCAGCAGCCGCGGTAATACGAAGGGTGCTAGCGTTATTCGGAATAACTGGGTGTAAAGA  
GCGTGCAGGCGGCCTGCTAAGTCGATCGTCGAAGCGCCAGCTTAACTGGGCAAAGGCGA  
GCGAACTGATAGGCTAGAGTATGGGAGAGAAGAGTGGAATTCCTCGGAGTAGCGGTAAAA  
TGCGTAGATCTCGAGAGGAACACCGGTTGCGAAGGCGGCTCTTTGGCCCATTACTIONGACGC  
TTAAGCGCGAAAGCGTGGGGAGCAAACAGGATTAGAAACCCTCGTAGTCC

>Otu3214

CCAGCCTATGGGTGGCAGCAGTGAAGGAATATTGGTCAATGGGCGCAAGCCTGAACCAGCC  
ATGCCGCGTGAAGGATGAAGGCCTTCTGGGTTGTAAACTTCTTTTATGTGGGAAGAAACC  
CCGCTTTTCTAAGCGGGTTGACGGTACCATAGGAATAAGCACCGGCTAACTCCGTGCCAG  
CAGCCGCGGTAATACGGAGGGTGCAAGCGTTATCCGGATTACTGGGTTTAAAGGGTGTG  
TAGGCGGGCAATTAAGTCAGTGGTGAATCTCCGAGCTTAACTTGGAACTGCCATTGAT  
ACTATTTGTCTTGAATTCTGTTGAGGTGGGCGGAATATGTCATGTAGCGGTGAAATGCAT  
AGAGATGACATAGAACCCCAATTGCGAAGGCAGCTCACTAAACAGTTATTGACGCTGAGG  
CACGAAAGCGTGGGGAGCAAACAGGATTAGATACCCGGGTAGTCC

>Otu3215

CCAGCCTACGGGATGCAGCAGTGGGGAATCTTGCGCAATGGGCGAAAGCCTGACGCAGCC  
ACGCCGCGTGAGTGAAGAAGGCCTTCGGGTTGTAAAGCTCTGTGAGCGGGACGAATGTC  
CAGTCGGTTTCATAGCCGATTGGGGTGACGGTACCGCTAAAGGAAGCACCGGCTAACTCTG  
TGCCAGCAGCCGCGGTAATACAGAGGGTGCAAGCGTTGCTCGGAATTATTGGGCGTAAAG  
GGTAGGTAGGTGGTCTCATTTGTCTGGGGTGAATCCTTGGGCTTAACCCAAGAAGTGCC  
CCAGAAACGGTGAGACTGGAGTCCTGGAGAGGGTTCGTGGAATTCCTGGTGTAGCGGTGAA  
ATGCGTAGAGATCGGGAGGAACACCAGAGGCGAAGGCGGCGACCTGGACAGGTACTGACA

CTCAACTACGAAAGCGTGGGGAGCAAACAGGATTAGAAAACCCCGTAGTCC

>Otu3217

CCAGCCTACGGGTTGCTGCAGTGGGGAATATTGCGCAATGGGGGAAACCCTGACGCAGCA  
ACGCCGCGTGAGTGAAGAAGGCCTTAGGGTTGTAAAGCTCTGTTGTACGGGAAAATTATG  
ATGGTACCGTATAAGAAAGGACCGGCTAACTTCGTGCCAGCAGCCGCGTAAGACGAGGG  
GTCCTAGCGTTGTTTCGGAATCATTGGGCGTAAAGCGCACGTAGGTGGCTTTGTAAGTCAG  
ATGTGAAAGCCCTGGGCTCAACCCAGGAAGTGCATTTGATACTGCAAAGCTTGAATATGG  
GAGAGGGTAGTAGAATTCTTGGTGTAGTGGTGAAATACGTAGATATCAGGAGGAATACCG  
GTGGCGAAGGCGGCTACCTGGCCCAATATTGACACTGAGGTGCGAAAGCGTGGGGATCAA  
ACAGGATTAGAGACCCGAGTAGTCC

>Otu3222

CCAGCCTATGGGGCGCACCCAGTAGGGAATCTTCCACAATGGGGCGAAAGCCTGATGGAGCA  
ACGCCGCGTGACAGGACGAAGGCCTTAGGGTTGTAAACTGCTTTTATCTGTGACGAATATG  
ACGGTAGCAGATGAATAAGGATCGGCTAACTCCGTGCCAGCAGCTGCGGTCATACGGAGG  
ATCCAAGCGTTATCCGGAATTACTGGGCGTAAAGAGTTGCGTAGGTGGCATAGTAAGTAG  
ATAGTGAAAGCGTGTGGCTCAACCATATACACATTATCTAAACTGCTGAGCTAGAGGATG  
AGAGAGGTTATTGGAATTCACGCGTAGGAGTGAAATCCGTAGATATTGGGAGGAACACC  
GATGGCGTAGGCAGATAACTGGCTCATTCTTGACACTAAGGCACGAAAGCGTGGGTAGCA  
AACGGGATTAGAGACCCCTAGTAGTCC

>Otu3227

CCAGCCTATGGGAGGCTCCAGTCGAGGATCTTCGGCAATGGACGCAAGTCTGACCGAGCG  
ACGCCGCGTGCGGGATGAAGGCTTTCGGGTGTAAAGCGCTGTCGAGGGGGAGGAAGCCG  
CAAGGTGGACCTATCCCTGGAGGAAGCACGGGCTAAGTTCGTGCCAGCAGCCGCGGTAAG  
ACGAACCGTGCGAACGTTGTTTCGGAATCACTGGGCTTAAAGGGCGCGTAGGCGGATCACC  
AAGTCCGGGGTGAAAGCCCCCAGCTTAACTGGGGAAGTGCCTTGGATACTGGTGGTCTCG  
AGGGAGGTAGGGGCAGTGGGAACTTCCGGTGGAGCGGTGAAATGCGTTGATATCGGAAGG  
AACGCCGCTGGCGAAAGCGCACTGCTGGACCTCTACTGACGCTGAGGCGCGAAAGCCAGG  
GGAGCAAACGGGATTAGAAAACCCTAGTAGTCC

>Otu3231

CCAGCCTATCGGGTGCTCCAGCGAGGGATTTTTCGCGCAATGGAGGAAACTCTGACGCAGCG  
ACGCCGCGTGCGGGACGAAGCCTTTCGGGTGTAAACCGCTGTCAGTGGAGAAGAGAATG  
GACGGTACCCACTGAGGAAGCCTCGGCTAACTACGTGCCAGCAGCCGCGGTAAGACGTAG  
GGGGCGAGCGTTGTCCGGAATCACTGGGCGTAAAGAGCTCGTAGGCGGGATTGTTAGTCT  
CGGAGTAAATCCATCTGCTCAACGGATGGTTCATCTGGGATACGGCAATTCTTGAGGACA  
GGAGAGGAAAGCGGAATTCCGAGTGTAGCGGTGAAATGCGTAGAGATTCGGAGGAACACC  
AGTGGCGAAGGCGGCTTTCTGGCCTGATTCTGACGCTGAGGAGCGAAAGCCAGGGGAGCG  
AACGGGATTAGATACCCAGTAGTCC

>Otu3235

CCAGCCTATGGGGCGCTGCAGTCGAGGATCTTCGTCAATGGGGCGCAAGCCTGAACGAGCG  
ACGCCGCGTGTCGATGAAGGCCTTTCGGGTGTAAAGCACTGTCGAGGGGGATCAAGGCG  
CAAGCTTGAGTGATCCCTGGAGGAAGCACGGGCTAAGTTCGTGCCAGCAGCCGCGGTAAG  
ACGAACCGTGCGAACGTTGTTTCGGAATCACTGGGCTTAAAGGGCGCGTAGGCGGCCTGCA  
AGGTCGGGGGTGAAATCCCACGGCTTAACCGTGGAAGTGCCTTCGATACCGGCGGGCTCG  
AGGAAGGTAGGGGTGCGCGGAACCTTCTGGTGGAGCGGTGAAATGCGTTGATATCAGAAGG  
AACGCCGGCGGCGAAAGCGGCGCACTGGACCTTTTCTGACGCTGAGGCGCGAAAGCCAGG  
GGAGCAAACGGGATTAGAGACCCGGGTAGTCC

>Otu3238

CCAGCCTATGGGTGCTGCAGTCGAGAATTTTTCTCAATGGGGGAAACCCTGAAGGAGCG  
ACGCCGCGTGAAAGGATGAAGGTCTTCGGATTGTAAACTTCTGTCATTGGGGAACAATGTG  
CGAGGGAGTAACTGCCCACGTATTGATAGTACCCGAAGAGGAAGAGACGGCTAACTCTGT  
GCCAGCAGCCGCGGTAATACAGAGGTCTCAAGCGTTGTTTCGGATTTCATTGGGCGTAAAGG  
GTGCGTAGGTGGCGAAGTAAGTCGGGTGTGAAATCTCGGGGCTTAACCCCGAACTGCAT  
TCGATACTGCTTTGCTCGAGGACTGGAGAGGAGATCGGAATTCATGGTGTAGCAGTGAAA  
TGCGTAGATATCATGAGGAAGACCACTGGCGAAGGCGGATCTCTGGACAGTTCTTGACAC  
TGAGGCACGAAGGCCAGGGGAGCAAACGGGATTAGAGACCCCGTAGTCC

>Otu3240

CCAGCCTATGGGTGGCACCCAGGCCGACATCGGTCATCAGCGTTGATCCGACATTTAGGGA  
TTCGAGCGCGGTGAGTCCTCCGATGTGTTTCGAGTGCCTATCTCCGGCTTTGGTTCCGTG

CAGGTTGAGGCGCTTCAGTTGTTTCCAATCGTGAATGGCGGCGATGCCTTCGTCCGGTGAT  
GTACTCGGCGTAGTAGAGGCTGAAGTCGGTGATGCCATGGAGATTCTTGATCTCCTGCAA  
GCCGGCGTCGGTGATGTGGGTGAGTGAAAGATCGAGGGTGGTCAGGGAAGGATAGTTGTT  
GAGCTGGCGCAGATCTGTGTCGTTGACCCAGGTTCCGCGCAGGCTGATGCCGGTGACCGC  
GCCTTTAGCGTTGCGTTGAACGGTGCCGCCCAGATCGGTTATCCAGTGAGTGTCTTCCTG  
CGAAAGCTGGTGACGGCGGAGATTAGAAACCCTAGTAGTCC

>Otu3243

CCAGCCTACGGGTGTCAGCAGTGGGGAATATTGGACAATGGGCGAAAGCCTGATCCAGCA  
ATGCCGCGTGAGTGATGAAGGCCCTAGGGTTGTAAAGCTCTTTCGCACGCGACGATGATG  
ACGGTAGCGTGAGAAGAAGCCCCGGCTAACTTCGTGCCAGCAGCCGCGGTAATACGAAGG  
GGGCTAGCGTTGTTTCGGAATTACTGGGCGTAAAGCGCACGCAGGCGGTCCGTAAATTAG  
AAGTGAAAGCCCTGGGCTCAACCCGGGAATTGCTTTTAAAGACTGGCGGACTAGAATCCGG  
AAGAGGGTAGCGGAATTCCCACTGTAGAGGTGAAATTCGTAGATATTGGGAAGAACACCG  
GTGGCGAAGGCGGCTACCTGGTCCGGAATTGACGCTCATGTGCGAAAGCGTGGGGAGCAA  
ACAGGATTAGATACCCGCGTAGTCC

>Otu3244

CCAGCCTACGGGAGGCTCCAGTCGAGGATCTTCCGCAATGAGCGCAAGCTTGACGGAGCA  
ACGCCGCGTGATGGGATGAAGGCCCTTCGGGTGTAAACCACTGTCACTCGTTAAGAAAGGG  
TTGGGGGTAAACAGCCTCCAGCACTGACTAAGGCGAGAGAGGAAGCCACGGCTAACTTCG  
TGCCAGCAGCCGCGGTAAGACGAAGGTGGCGAGCGTTGTTTCGGAATCACTGGGCATAAAG  
CGCACGTAGGCGGTGCCGTAAGTCGGGTGTGAAATCCCTCGGCCTAACCGAGGAACCTGCG  
CCCGATACTGCGGTGCTTGAGGACCAGAGGGGTGCATGGAATTTCCGGTGGAGCGGTGAA  
ATGCGTTGATATCGGAAGGAACCTCCGGCGGCGAAAGCGATGCACTGGCTGGTTTCTGACG  
CTGAGGTGCGAAAGCCAGGGGAGCAAACGGGATTAGAAACCCCCGTAGTCC

>Otu3245

CCAGCCTATGGGTGGCTCCAGTGGGGAATATTGCTCAATGGGGGAAACCCTGAAGCAGCA  
ACGCCGCGTGAGTGATGAAGGCCCTTCGGGTGCTAAAGCTCTGTTGTACGGGACGAATGCG  
CCTATGGCTAACATCCATGGGCAGTGACAGTACTGTATAAGTAAGGACCGGCTAACTTCG  
TGCCAGCAGCCGCGGTAAGACGGGGGGTCCTAGCGTTGTTTCGGAATCATTGGGCGTAAAG  
CGTGTGCAGGTGGTTCTGTAAAGTTAGATGTGAAAGCCTTGGGCTTAACCCAAGAAGTGCA  
TTTAAAACTACAAAACCTTGAATATGGGAGAGGGTTCGTGGAATTCCTGGTGTAGTGGTGAA  
ATACGTAGATATCAGGAGGAACACCGGTGGCGAAGGCGGCGACCTGGTCCAATATTAACA  
CTCATAACAGAAAGCGTGGGGATCAAACAGGATTAGAGACCCGAGTAGTCC

>Otu3246

CCAGCCTACGGGTGGCTGCAGTGGGGAATCTTGCGCAATGGACGAAAGTCTGACGCAGCC  
ACGCCGCGTGAGTGAAGAAGGCCCTTCGGGTGTAAAGCTCTGTGCCCCGGGACGAACAGC  
CGATTGGTGAATAGCCAGTCGGTCTGACGGTACCGGGAAGGAAGCACCGGCTAACTTCG  
TGCCAGCAGCCGCGGTAATACGAGGGGTGCAAGCGTTGCTCGGAATTATTGGGCGTAAAG  
GGTAGGTAGGTGGTCTCATTTGTCTGGGGTGAAAGCCTCGAGCTTAACTCGAGAAGTGCC  
CCAGAAACGGTGAGACTGGAGTCCTGGAGAGGGTTCGTGGAATTCCTGGTGTAGCGGTGAA  
ATGCGTAGAGATCGGGAGGAACACCAGAGGCGAAGGCGGCGACCTGGACAGGTACTGACA  
CTCAACTACGAAAGCGTGGGGAGCAAACAGGATTAGAGACCCCGGTAGTCC

>Otu3249

CCAGCCTACGGGATGCAGCAGTGGGGAATTTTCCGCAATGGGCGCAAGCCTGACGGAGCA  
ACGCCGCGTGGGTGACGAAGTCTTTCGGGATGTAAAGCCCTTTCAGCTGGGAAGAAACAA  
ATGACGGTACCAGCAGAAGAAGCATCGGCTAACTACGTGCCAGCAGCCGCGGTAATACGT  
AGGATGCAAGCGTTGTCCGGATTTATTGGGCGTAAAGCGTACGTAGGCGGCCTTGTAAGT  
CGGTGGTTAAAGCCCTCAGCTCAACTGCGGGACTGCCATCGAAACTGTGAGGCTGGAGGT  
TGGTAGAGGAAGTCGGAATTCCCAGTGTAGCGGTGAAATGCGTAGATATTGGGAGGAACA  
CCAGTGGCGAAAGCGGACTTCTGGGCCACACCTGACGCTGAGGTACGAAAGCCAGGGTAG  
CGAACGGGATTAGAAACCCCTGTAGTCC

>Otu3253

CCAGCCTACGGGGCGCACCACTGGGGAATTTTACGCAATGGGGGAAACCCTGACGTAGCG  
ACACCGCGTGAACGAAGAAGCCCTTTTGGGGTGTAAGTTCTGTGACGTGGAACGAAAAAA  
ATGACGGTACCAGCAGAGGAAGCATCGGCTAACTACGTGCCAGCAGCCGCGGTAAGACGT  
AGGATGCAAGCGTTGTCCGGATTTATTGGGCGTAAAGAGTTTCGTAGGTGGTTTGTAAAGT  
TTGATGTTAAAGATCAGGGCCCAACCCTGGGAGTGCATTGAATACTGGCAGACTGGAGTG  
TAGTAGGGGCAAGCGGAATTCCCAGTGTAGCGGTGAAATGCGTAGATATTGGGAAGAACA

CCAGTGGCGTAAGCGGCTTGCTGGGCTACAACCTGACACTGAGGAACGAAAGCCAGGGGAG  
CAAATGGGATTAGATACCCCTGTAGTCC

>Otu3254

CCAGCCTATGGGTGGCACCAGTAGGGAATTTTCCACAACGGGCGAAAGCCTGATGGAGCA  
ACGCCGCGTGAGGATGAAGGCCTTCGGGTGTAAACTGCTTTTATATGTGAAGATTATG  
ACGGTAGCATATGAATAAGGATCGGCTAACTCCGTGCCAGCAGCCGCGGTCATACGGAGG  
ATCCAAGCGTTATCCGGAATTACTGGGCGTAAAGAGTTGCGTAGGTGGCATAGTAAGCGG  
ACAGTGAAAGCGTGTGGCTCAACCATATACACATTGTCTGAACTGCTAAGCTAGAGGACG  
AGAGAGGTACCTGGAATTCCTAGTGTAGGAGTGAAATCCGTAGATATTAGGAGGAACACC  
GATGGCGTAGGCAGGGTACTGGCTTGTTCTTGACACTAAGGCACGAAAGCGTGGGGAGCG  
AACGGGATTAGATACCCGCGTAGTCC

>Otu3257

CCAGCCTACGGGGGGGAGCAGTGGGGAATCTTGACACAATGGGCGAAAGCCTGATGCAGCA  
GCGCCGCGTGAGGGACGAATGCTTTCTGAGTTGTAAACCTCTTTCAGCAGGGACGATAAT  
GACGGTACCTGCAGAAGAAGCACCGGCCAACTACGTGCCAGCAGCCGCGGTGATACGTAG  
GGTGCAAGCGTTGTCCGGATTTATTGGGCGTAAAGAGCTCGTAGGCGGTTTGATAAGTCG  
GGTGTGAAACCCCCAGGCTCAACCTGGGGACGCCACTCGATACTGTTATGACTAGAGTCT  
GGTAGGGGATCACGGAATTCCTGGTGTAGCGGTGGAATGCGCAGATATCAGGAGGAACAC  
CAGTAGCGAAGGCGGTGATCTGGGCCAGTACTGACGCTGAGGAGCGAAAGCGTGGGGAGC  
GAACAGGATTAGAGACCCCAGTAGTCC

>Otu3258

CCAGCCTACGGGGTGCTGCAGTGGGGAATTTTACACAATGGGGGAAACCTGATGTAGCG  
ACACCGCGTGAGCGAAGAAGCCCTTTGGGGTGTAAGCTCTGTGCGCAGGGACGAAAAAA  
ATGACGGTACCTGCAGAGGAAGCATCGGCTAACTACGTGCCAGCAGCCGCGGTAAGACGT  
AGGATGCGAGCGTTGTCCGGATTTATTGGGCGTAAAGAGTTCGTAGGTGGTTTTATAAGT  
CTGGTGTAAAAGGCGCGGGCTCAACCCGTGTAGAGCACTGGATACTGTAAGACTTGAGTT  
AAGTAGAGGCAAGCGGAATTCCTAGTGTAGCGGTGAAATGCGTAGATATTGGGAAGAACA  
CCGGTGGCGCAAGCGGCTTGCTGGGCTTAAACTGACGCTGAGGCACGAAAGCGTGGGGAG  
CAAACAGGATTAGAAACCCCGTAGTCC

>Otu3260

CCAGCCTACGGGTGGCAGCAGTGGGGAATCTTGCGCAATGGACGAAAGTCTGACGCAGCC  
ACGCCGCGTGAGTGAAGAAGGCCTTCGGGTGTAAAGCTCTGTGCGTAGGGACAAAAACC  
GCTTAGGTGAATAGCCTAGGCGCTTGATGGTACCTTGAAAGGAAGCACCGGCTAACTTCG  
TGCCAGCAGCCGCGGTAATACGAAGGGTGCAAGCGTTGCTCGGAATTATTGGGCGTAAAG  
GGTAGGTAGGTGGTTACGTATGTCTGAGGTGAAATCCCTGAGCTTAACTCAGGACGTGCC  
TTGGAACGGCGTAAGTAGAGTGCTGGAGAGGTTTCGCAGAATTCCCGGTGTAGCGGTGAA  
ATGCGTAGAGATCGGGAGGAATACCAGAGGCGAAGGCGGCGAACTGGACAGTTACTGACA  
CTAAACTACGAAAGCGTGGGGAGCAAACAGGATTAGATACCCTTGTAGTCC

>Otu3261

CCAGCCTACGGGAGGCTCCAGTGGGGAATTTTGACAATGGGCGAAAGCCTGATCCAGCG  
ACGCCGCGTGAGTGAAGAAGGCCTTCGGGTGTAAACTTCTTTTAGAGGGGACGAAAAAA  
ATGACGGTACCCCTCGGAATAAGCCACGGCTAACTACGTGCCAGCAGCCGCGGTAATACGT  
AGGTGGCGAGCGTTACTCGGAATTACTAGGCGTAAAGCGCATGTAGGCGGTCTGATAAGT  
CCATGGTGAAATTTCCCGGCTCAACCGGGATAGGCCCATGAAACTATCTGACTTGAGTG  
TGGCAGGGGTAGACGGAATTCCTGGTGTAGCGGTGAAATGCGTAGATATCGGGAGGAACA  
CCGATGGCGAAAGCAGTCTACTGGGCCAATACTGACGCTGATGTGCGAAAGCTAGGGGAG  
CAAACAGGATTAGAAACCCCTTG TAGTCC

>Otu3262

CCAGCCTATGGGACGCTGCAGTGGGGAATATTGGACAATGGGCGCAAGCCTGATCCAGCC  
ATGCCGCGTGAGTGAAGAAGGCCTTAGGGTTGTAAAGCTCTTTTGGCGGGGACGATAATG  
ACAGTACCCGCGAGAATAAGCCCCGGCTAACTTCGTGCCAGCAGCCGCGGTAATACGTAGG  
CAGCAAGCGTTGTTCCGAGTTACTGGGCGTAAAGGGTGTGTAGGCGGTTCCCTTAAGTTTG  
TTGTGAAATCTCCCGGCTTAACCGGGAGGGTGCGGCGAATACTGAGGGACTAGAGTACGG  
GAGAGGAAAGTGGAATTCCTGGTGTAGCGGTGAAATGCGTAGATATCAGGAGGAACACCG  
GTGGTGTAGACGGCTTTCTGGACCGACACTGACGCTGAGACACGAAAGCGTGGGTAGCAA  
ACAGGATTAGATACCCCGTTAGTCC

>Otu3265

CCAGCCTACGGGATGCAGCAGTGGGGAATATTGGACAATGGGCGCAAGCCTGATCCAGCC

ATGCCGCGCGAGTGAAGAAGGCCTTCGGGTTGTAAAGCTCTTTCAGGTGGGACGATGATG  
ACGGTACCACCAGAAGAAGCTCCGGCTAACTTCGTGCCAGCAGCCGCGGTAATACGAAGG  
GAGCTAGCGTTGTTTCGGAATTACTGGGCGTAAAGCGCGCGTAGGCGGTTTACTCAGTCAG  
AGGTGAAATCCTGGGGCTCAACCTCGGCATTGCCTTTGATACTGGTAAGCTTGAGTTCGG  
AAGAGGATGGTGGAATACCCAGTGTAGAGGTGAAATTCGTAGATATTGGGTGGAACACCG  
GTGGCGAAGGCGACCATCTGGTCCGATACTGACGCTGAGGTGCGAAAGCGTGGGGAGCAA  
ACAGGATTAGAACCCTGGTAGTCC

>Otu3274

CCAGCCTACGGGTGGCTGCAGTGAGGAATATTGGTCAATGGACGCAAGTCTGAACCAGCC  
ATGCCGCGTGAAAGGATGAAGGCCTTCTGGGTTGTAAACTTCTTTTATGTGGGAAGAAACC  
TCTGATTTCTATTAGAGTTGACGGTACCATAGGAATAAGCACCGGCTAACTCCGTGCCAG  
CAGCCGCGGTAATACGGAGGGTGCAAGCGTTATCCGGATTTACTGGGTTTAAAGGGTGTG  
TAGGCGGGTCTTTAAGTCAGTGGTGAAATCTCCGAGCTCAACTTGAAAAGTCCATTGAT  
ACTATTGATCTTGAATTCTGTTGAGGTGGGCGGAATAAGTCATGTAGCGGTGAAATGCAT  
AGATATGACTTAGAACCCCGATTGCGAAGGCAGCTCACTAAGCAGACATTGACGCTGAGG  
CACGAAAGCGTGGGGATCAAACAGGATTAGATACCCCGTAGTCC

>Otu3275

CCAGCCTATGGGGTGCTCCAGTGGGGAATTTTGGACAATGGGCGAAAGCCTGATCCAGCC  
ATGCCGCGTGAGTGAAGAAGGCCTTCGGGTTGTAAAGCTCTTTCGCAAGGAAAGAAAAC  
TAGCTACTAATACTAGCTGAGGATGACGGTACCTTGATAAGAAGCACCGGCTAACTACGT  
GCCAGCAGCCGCGGTAATACGTAGGGTGCGAGTGTTAATCGGAATTACTGGGCGTAAAGC  
GTGCGCAGGCGGTTTCGATAAGTCTGATGTGAAATCCCCGGACTCAACCTGGGAACTGCGT  
TGGAAGTGTGAGCTAGAGTGTAGAAGAGGGGGGTAGAATTCACGTGTAGCAGTGAAA  
TGCGTAGAGATGTGGAGGAATACCGATGGCGAAGGCAGCCCCCTGGGCTAACACTGACGC  
TCATGCACGAAAGCGTGGGGAGCAAACAGGATTAGAAACCCCGGTAGTCC

>Otu3283

CTAGCCTACGGGGGGGCTGCAGTGGGGAATATTGGACAATGGGCGAAAGCCTGATCCAGCC  
ATGCCGCGTGAGTGATGAAGGCTCTAGGGTTGTAAAGCTCTTTCGCCGATGAAGATAATG  
ACGGTAGTCGGAGAAGAAGCCCCGGCTAACTTCGTGCCAGCAGCCGCGGTAATACGAAGG  
GGGCTAGCGTTGTTTCGGAATTACTGGGCGTAAAGCGCGCGTAGGCTGTGCGACAAGTCAG  
TGGTGAAATCCCGGAGCTCAACTTCGGAAGTCCATTGAAAGTGTGCTGCTGGAATCTCA  
GAGGGGGTAGCGGAATTCCAAATGTAGAGGTGAAATTCGTAGATATTTGGAGGAACACCG  
GTGGCGAAGGCGGCTACCTGGCTGAGTATTGACGCTGAGGCGCGAAAGCGTGGGGATCAA  
ACAGGATTAGAAACCCGAGTAGTCC

>Otu3284

CCAGCCTACGGGGGGGCGAGCAGCAAGGAATTTTGTGCAATGGGCGAAAGCCTGACACAGCG  
ACACCGCGTGGGGGATGAAGGCCTTCGGGTTGTAAACCCCTTTTCTCAGGGAGGAAAAC  
GACAGTACCTGAGGAATAAGTGACGGCTAACTACGTGCCAGCAGCCGCGGTAATACGTAG  
GCCACGAGCGTTATCCGGATTTACTGGGCGTAAAGAGTGCGCAGACGGTCTTTCAAGTCG  
GATGTAAAATCTCCTGGCTTAACTGGGAGGGATCACCCGATACTGTGAGACTTGAGGACA  
ACATAGGAAGGTAGAATTCCCGGTGTAGTGGTGAAATGCGTAGATATCGGGAGGAATACC  
AGTGCGCAAGGCGGCCTTCTGGGTTGTTTCTGACGTTTCAGGCACGAAAGTGTGGGGAGCA  
AACAGGATTAGATACCCTCGTAGTCC

>Otu3285

CCAGCCTATGGGGCGCTCCAGTCGAGAATCTTCCGCAATGGGCGAAAGCCTGACGGAGCG  
ACGCCGCGTGATCGATGAAGTCCCTCTGGGACGTAAAGATCTTTTGTGGGATAGAAAGTT  
TATTGATCATCCCAAGAATAAGAGGTTGCTAAACTCGTGCCAGCAGCAGCGGTAATACGA  
GTGCCTCAAGCGTTATCCGGAATCATTGGGCGTAAAGGGTGTGTAGGCGGTCGCGTTAGT  
CTTCTGTCAAATCTTCGGCTTAACCGGGGGCTCGCAGAGGAAACGGCGCGACTTGAGAG  
TGCGAGGGGTGAATGGAAGTCACTGGAGTAGGGGTGAAATCCGTTGATATCATGGGGAACA  
CCAAAAGCGAAGGCAATTCAGTGGCGCATTTCTGACGCTGAAACACGAAAGCGTGGGTAG  
CGAATGGGATTAGAGACCCGTGTAGTCC

>Otu3289

CCAGCCTATGGGTCGCTCCAGTGAGGAATATTGGTCAATAGGGGGAACCCCTGAACCAGCC  
ATGCCGCGTGAAAGGAAGAATGCCCTAAGGGTTGTAAACTTCTTTTGTACGGGAGTAAAGA  
CAGGTACGCGTACCTGAGTGAAAGTACCGTGCGAATAAGCATCGGCTAACTCCGTGCCAG  
CAGCCGCGGTAATACGGAGGATGCGAGCGTTATCCGGATTTATTGGGTTTAAAGGGTGGC  
TAGGCGGACTTATAAGTCAGTGGTGAAATCTCATCGCTTAACGATGAACGTGCCATTGAT

ACTGTAGGTCTTGAGTACAGATGCCGTTGGCGGAATGTGTCATGTAGCGGTGAAATGCAT  
AGATATGACACAGAACACCGATTGCGAAGGCAGCTGACGAACTGTAAGTACGCTGAGG  
CACGAAAGCGTGGGGATCAAACAGGATTAGATACCCCTGTAGTCC

>Otu3293

CCAGCCTACGGGAGGCACCAGTCGAGAATCATTCGCAATGGGCGAAAGCCTGACGATGCG  
ACGCCGTGTGTGCGATGAAGGCCTTCGGGTGTAAAGCACTTTCGCCTGGGAACAAGAGA  
AGCTGGCTAACATCCAGTGGATTTGAGGGTACTAGGTAAAGAAGCACCGGCTAACTACGT  
GCCAGCAGCTGCGGTAATACGTAGGGTGCAAGCATTAAATCGGATTTATTGGGCGTAAAGG  
GCGCGTAGGCTGATGTGTAAGTCAGATGTGAAATCCCGGGGCTCAACCCCGGAACAGCAT  
TTGAAACTGCACGTCTAGAGGGTAGGCGGAGAAAACGGAATTCACAAGTAGCGGTGAAA  
TGCGTAGATATGTGGAAGAACACCTGTGGCGAAGGCGGTTTTCTAGCTTATACCTGACGC  
TGAGGCGCGAAAGCAAGGGGATCAAACAGGATTAGAAACCCGTGTAGTCC

>Otu3294

CCAGCCTATGGGGGGGCTCCAGTCGAGAATTTTTCTCAATGGGGGAAACCCTGAAGGAGCG  
ACGCCGCGTGGGGGATGAATGGCTTCGGCCCGTAAACCCCTGTCATTTGCGAACAAATTG  
TTTCAGCTAACAAATGAAGCATTGATTGTAGCAGAAGAGGAAGGGACGGCTAACTCTGTG  
CCAGCAGCCGCGGTAATACAGAGGTCCCAAGCGTTGTTTCGATTCACTGGGCGTAAAGGG  
TGCGTAGGCGGTAGGGTAAGTCTGATGTGAAATCTCCAAGCCTAACTTGAAACTGCATC  
GGAAACTATCCTGCTCGAGGAATGGAGGGGAGACTGGAATACTTGGTGTAGCAGTGAAAT  
GCGTAGATATCAAGTGGAACACCAGTGGCGAAGGCGAGTCTCTAGACATTTCTGACGCT  
GAGGCACGAAAGCCAGGGGAGCAAACGGGATTAGATACCCCTAGTAGTCC

>Otu3295

CCAGCCTATGGGGCGCTCCAGAGGAGGATCATCGTCAATGGGCGAAAGCCTGAACGTGCG  
ACGCCGCGTGGGGGACGAAGGCCTTCGGGTGCTAAACCCCTGTCAGTTGCTGAGAACATA  
CCGGCGGTTAATAGCCGCCGTTATTGACTAGTAGCAGAGGAAGGGACGGCTAACTTCGTG  
CCAGCAGCAGCGGTAATACGGAGGTCCCTAGCGTTGTTTCGATTACTGGGCGTAAAGGG  
CGTCTAGGCGGGACGGCAAGTCGGGTATGAAATGCTCTGGCTCAACCAGAGAATGGTGCC  
CGAAACTGCCGCCCTTGAGTATAGCAGAGGACAGTGGAACCTCTTGGTGGAGCGGTGAAAT  
GCGTAGATATCAAGAGGAACGCCGAGGCGAAAGCGATTGTCTGGGCTATTACTGACGCT  
GAAGCGCGAAAGCTAGGGGAGCAAACGGGATTAGATACCCCTAGTAGTCC

>Otu3298

CCAGCCTACGGGATGCAGCAGTGGGGAATCTTGCAATGGGGGAAACCCTGATGCAGCG  
ACGCCGCGTGAGCGATGAAGCCCTTCGGGTGTAAAGCTCTTTCGGCAGGGACGATAATG  
ACGGTACCTGCAGAAGAAGCTGCGGCTAACTACGTGCCAGCAGCCGCGGTAATACGTAGG  
CAGCAAGCGTTGTTTCGGAATTACTGGGCGTAAAGAGTGCGTAGGCGGTTTGGCAAGTTCG  
GTGTGAAATCTCCCGGCTTAAC TGGGAGGGTGCGCCGAAACTGCCAGACTAGAGTGTGG  
GAGAGGGGAGTGGAATTTCCGGTGTAGCGGTGAAATGCGTAGATATCGGAAGGAACACCT  
GTGGCGAAAGCGGCTCACTGGACCACAAC TACGCTGATGCACGAAAGCGTGGGGAGCAA  
ACAGGATTAGATACCCCGTAGTCC

>Otu3300

CCAGCCTATGGGTGGCTGCAGCTAAGAATCTTCCGCAATGGGCGAAAGCCTGACGGAGCG  
ATGCCGCGTGATCGATGAAGGTCGAGAGATTGTAAAGATCTTTTCCGCATGAGGAATAAA  
GCCAGGAGGGAATGCCTGGCAGATGACGTTAGTGCGGGAATAAGCCCCGGCTAATTACGT  
GCCAGCAGCCGCGGTAACACGTAAGGGGCGAGCGTTGTTTCGGAATTATTGGGCGTAAAGG  
GCACGCAGGCGGTTGTGCAAGTCTGATGTGAAAGACCTGGGCTTAAC TACGGGGCCGCGT  
TGAAACTGCATAACTAGAGTATTGGAGGGGAGTCGGAATTCCTAGTGTAGGGGTGAAA  
TCTGTTGATATTAGGAAGAACACCGGTGGCGAAGGCGGACTCCTGGCCAATGATTGACGC  
TGAGGTGCGAAAGTGTGGGGATCAAACAGGATTAGATACCCGCGTAGTCC

>Otu3301

CCAGCCTACGGGGGGCAGCAGTGGGGAATATTGGACAATGGGCACAAGCCTGATCCAGCC  
ATGCCGCGTGAGTGAAGAAGGCCTTAGGGTTGTAAAGCTCTTTTGGCGGGGACGATAATG  
ACGGTACCCGCGAGAATAAGCCCCGGCTAACTTCGTGTCAGCAGCCGCGGTAATACGAAGG  
GGGCTAGCGTTGTTTCGGAATTACTGGGCGTAAAGGGCGCGTAGGCGGTTTCGACAAGTCAG  
ATGTGAAAGCCCTGGGCTCAACCCAGGAAATGCGTTTGATACTGTGCTGCTTGAATTCGG  
GAGAGGTTGGTAGAATTGCCAGTGTAGAGGTGAAATTCGTAGATATTGGCAAGAATACCC  
GTGGCGAAGGCGGCCAACTGGACCGACATTGACGCTGAGGCGCGAAAGCGTGGGGAGCAA  
ACAGGATTAGAAACCCCGTAGTC

>Otu3302

CCAGCCTATGGGGTGCTGCAGTGGGGAATCTTGCACAATGGGGGAAACCCTGATGCAGCG  
ACGCCGCGTGAGCGATGAAGCCCCTCGGGGTGTAAAGCTCTTTCGGCGGGGACGATAATG  
ACGGTACCGGTGGAAGAAGCCCCGGCTAACTCTGTGCCAGCAGCCGCGGTAATACAGAGG  
GGGCGAGCGTTGTTTCGGAATTATTGGGCGTAAAGGGCGCGTAGGCCGGTGCGGTAAGTCTT  
TTGTGAAATCTCCGGGCTCAACTCGGAGTCTGCAGGAGAACTGCCGTGCTTGAGTGTGG  
GAGAGGTGAGTGGAATTCCTGGTGTAGCGGTGAAATGCGTAGATATCGGGAGGAACACCC  
GTGGCGAAAGCGGCTCACTGGACCACAACCTGACGCTGAGGCGCGAAAGCTAGGGGAGCAA  
ACAGGATTAGAAACCCGAGTAGTCC

>Otu3303

CCAGCCTATGGGTGGCACCAGTTTCGAATTATTCCCAATGGGCGCAAGCCTGAGGGTGCA  
ATACCGCGTGAGGATGAAGGCCTTAGGGTCGTAAACTCCTGTCGTCAGGGACAAAACCT  
TTTATTTTAAATAGAATAAAAAGCTGATTTAACTTGAAGAGGAAGAGGTGGCTAACTCTGTG  
CCAGCAGCCGCGGTGATACAGAGACCTCAAGCGTTACTCGGATTCACTGGGCGTAAAGGG  
TACGTAGGTGGTGGGATATGTTGGATGTGAAATTCCGGAGCTTAACTCCGGCGCTGCGTC  
CAAACTATCTCACTAGAGTACTGTAGAGAAGAGCGGAATTTAGGTGTAGCGGTAAAT  
GCGTAGATATCTGAAAGAACACCAACGGCGAAGGCAGCTCTTGGGCAGTAACTGACACT  
GAGGTACGAAAGCGTGGGGAGCAAAAAGGATTAGAGACCCAGTAGTCC

>Otu3304

CCAGCCTACGGGATGCAGCAGTGGGGAATATTGCGCAATGGGCGAAAGCCTGACGCAGCA  
ACGCCGCGTGGGTGATGAAGGCCTTCGGGTCGTAAACCTGTCGGGTGGAACGAATTCC  
CTCTTCGCTAATATCGGAGAGGATTGACGGTACCACCGAAGGAAGCCCCGGCTAACTACG  
TGCCAGCAGCCGCGGTAATACGTAGGGGGCGAGCGTTGTTTCGGATTTACTGGGCGTAAAG  
AGCGCGTAGGCGGTACGATAAGTCGGAGGTGAAATCCCTCGGCTCAACCGAGGACCCGCG  
TCCGATACTGTGCAACTTGAGTGCAGGAGAGGAGAGCGGAATTTCCAGTGTAGCGGTGAA  
ATGCGTAGATACTGGGAGGAACACCGGTGGCGAAGGCGGCTCTCTGGACTGTCACTGACG  
CTGAGGCGCGAAAGCTAGGGGAGCAAAACGGGATTAGAAACCCTTGTAGTCC

>Otu3305

CCAGCCTATGGGAGGCTCCAGTGGGGAATTTTGCACAATGCCCCGAAGGGTGATGCAGCA  
ACGCCGCGTGAGGGATGAAGGCCTTCGGGTCGTAAACCTCTTTCGATCGGGAGAAACGGT  
CCGCTGAAGAGGCGGATCTGATGGTACCGGATGAAGAAGCCCCGGCCAACCTACGTGCCAG  
CAGCCGCGGTAATACGTAGGGGGCGAGCGTTGTTTCGGAATTACTGGGCGTAAAGGGCGTG  
TAGGCGGTGCGGTATGTGGGGCGTGAAATCCCCGGGCTTAACCCGGGGGGGCCGTTCCGG  
ACTGCCGTGCTAGGGTGCGGGAGAGGGCAGTGGAATTTCCCGGTGTAGCGGTGAAATGCGT  
AGATATCGGGAGGAACACCTGCGGCGAAGGCGGCTGCCTGGACCGTAACCGACGCTGAGG  
CGCGAAAGCTAGGGGAGCAAAACAGGATTAGATACCCGAGTAGTCC

>Otu3307

CCAGCCTATGGGTGGCAGCAGTGGGGAATTTTGCAGCAATGGGGGAAACCCTGACGCAGCA  
ACGCCGCGTGAGGATGAAGTACCTTGGTACGTAAACCCCTTTCGATCGGGACGATAATG  
ACGGTACCGAGAGAAGAAGCCCCGGCTAACTTCGTGCCAGCAGCCGCGGTAATACGAAGG  
GGGCTAGCGTTGTTTCGGAATCACTGGGCGTAAAGCGCACGCAGGCGGATTGATAAGTCAG  
GGGTGAAATCCCCGGGCTCAACCTCGGAATTGCCTTTGATACTGTCTATCTTCGAGTTTCG  
GGAGAGGTTGGCGGAATTCCCTAGTGTAGAGGTGAAATTCGTAGATATTAGGAAGAACACC  
AGTGGCGAAGGCGGCCAACTGGCCGATACTGACGCTCATGTGCGAAAGCGTGGGGAGCA  
AACAGGATTAGAAACCCGAGTAGTCC

>Otu3308

CCAGCCTATGGGTTGCTGCAGTGAGGAATTTTGCAGCAATGGCCGCAAGGCTGACGCAGCA  
ACGCCGCGTGGGTGAAGAAGGCCTTCGGGTCGTAAAGCCCTGTCAGGTGGGAAGAACGAC  
CGGGGGACTAATAGTTTCCCGGATTGACGGTACCACCAAAGGAAGCACCGGCTAACTTCG  
TGCCAGCAGCCGCGGTAATACGAAGGGGGCTAGCGTTGTTTCGGAATCACTGGGCGTAAAG  
CGTACGCAGGCGGATTGATAAGTCAGGGGTGAAATCCCCGGGCTCAACCTCGGAATTGCC  
TTTGATACTGTCTATCTTCGAGTTCGGGAGAGGTTGGCGGAATTCCTAGTGTAGAGGTGA  
AATTCGTAGATATTAGGAAGAACACCAAGTGGCGAAGGCGGCCAACTGGCCCGATACTGAC  
GCTCATGTACGAAAGCGTGGGGAGCAAAACCGGATTAGAGACCCGAGTAGTCC

>Otu3314

CCAGCCTACGGGGCGCTGCAGTAAAGAATCTTTCACAATGGGGGAAACCCTGATGAAGCA  
ACACCGCGTGAGGATGAAGGCGTTTTTCGTTGTAAACTCCTTTTCTGAAGGAATAACTTT  
GAAGGTACTTCAGGAATAAGCAACGGCTAACTACGTGCCAGCAGCCGCGGTAATACGTAG  
GTTGCGAGCGTTATCCGGAATTATTGGGCGTAAAGCGTGCGCAGGCGGTTTGTAAAGTTG



GATGTCAAAGCCTTGAGCTCAACTCAAGTCAGGTATCCAATACTGGCAAGCTGGAGATAG  
GCAGAGGTAAGTGGAAATTCTGTATGTAGGGGTAATATCCGTAGATATACAGAGGAACACC  
AAAAGCGAAGGCAGCTTACTGGGCCTTTTCTGACGCTCATGCACGAAAGCGTGGGGAGCA  
AACGGGATTAGATACCCAGTAGTCC

>Otu3315

CCAGCCTATGGGGCGCAGCAGTCGCGAAAACTTTACAATGCACGAAAGTGTGATAAGGGA  
ATTCCAAGTGCTTTATCTTCGGATAAGGCTTTTGCCAAGTCCAAACAGCTTGGCGAATAA  
GTGGTGGGCAAGACCGGTGCCAGCCGCCGCGGTAACACCGCGCCACGAGTGGGGATCAT  
ATTTATTGGGTCTAAAGCATCCGTAGCCGTTTAGCAACTCTTTTGTGAAATCGTTTCGC  
TTAACGTAACGACGTGCAAAAGAACTACTAGACTAGGAACCGGGAGAGGTTAGAGGTAT  
TCTGGGGGGAGCGGTAAAATGTGATAATCCTCAGAGGACCACCAATGGTGTAGGCATCTA  
ACTAGAACGGGTTCGACGGTGAGGGATGAAGGCTAGGGGAGCGATCCGGATTAGAGACCC  
TAGTAGTCC

>Otu3317

CCAGCCTATGGGATGCTGCAGTGAGGAATATTGCTCAATGGACGAAAGTCTGAAGCAGCA  
ACGCCGCGTGCGGGATGAAGGCCCTATGGGTTCGTAAACCGCTGTAGAATGGGACAAATAT  
CCGCCTCGGGCGGATTTCGATGGTACCGTTAAAGTAAGCCTCGGCAAACTACGTGCCAGCA  
GCCGCGGTAATACGTAGGAGGCAAGCGTTGTCCGGAATCACTGGGTGTAAAGGGTTCGCA  
GGCGGGAAGGTAAGTTAGAGGTGAAATCTTGACGCTTAACTGCAAACTGCCTCTGATAC  
TGCTTTTCTTGAGTACGGAAGAGAATGATGGAATTCCTGGTGTAGCGGTGAAATGCGTAG  
ATATCAGGAAGAACACCAAGTGGCGAAGGCGGTCAATTTGGTCCGTTACTGACGCTCAGGCA  
CGAAAGCGTGGGGATCAAACAGGATTAGAAACCCGAGTAGTCC

>Otu3318

CCAGCCTACGGGTGGCACCAGTGGGGAATCTTCCACAATGGGCGAAAGCCTGATGGAGCA  
ACGCCGCGTGGGTGATGAAGGCCCTTCGGGTGTAAAACCCCTGTCTTGCGAGAATAAGGTT  
GCAGGGTGAATAATCCTGCAACTTGACTGTATCGCAGGAGGAAGACACGGCTAACTCTGT  
GCCAGCAGCCGCGGTAATGCAGAGGTGTCAAGCGTTGTCCGGAATTACTGGGCGTAAAGG  
GCGTGTAGGTGGGTTCGGTAAGTCGGATGTGAAATCACTGGGCTTAACCCAGTAACTGCAT  
CCGAAACTGCCGGTCTTGAGTGCAGAAGAGGAGCGGAATTCACAGTGTAGCGGTGAAA  
TGCGTAGATATTGGGAGGAACACCAAGTGGCGAAGGCGGCTCTCTGGTCTGCAACTGACAC  
TGAAACGCGAAAGCTAGGGGAGCAAACGGGATTAGAAACCCCTAGTAGTCC

>Otu3321

CCAGCCTATGGGGGGCTGCAGGCGCGCAAACTCCACAATGCGCGTAAGCGTGATGGGGGG  
AATCTGAGCGATTCACTTCGGTGAATCTTTTGCCAAGTCCAGTCAGCTTGGCGAATAAGT  
GCTGGGCAAGACCGGTGGCAGCCGCCACGGTAATACCGGCAGCACAAAGTGGTGTCCACGA  
TTATTGGGCTTAAAGCGCTCGTAGCTGGCAAATACCGTCTCGTGTGAAATATTGGTGCTC  
AACATCAATGCGGGCACGAGATACCTATTTGCTAGGGAGCGGGTGAGGTCAGGAGTACTT  
ATGGGGAAGGGGTAAAATCCTATAATCCTATAAGGACTAACGGTGGCGAAGGCGCCTGAC  
TAGAACGCATCCGACAGTGAGGAGCGAAGGCTAGGAGAACGAATCGGATTAGAGACCCTT  
GTAGTCC

>Otu3322

CCAGCCTACGGGTGGCTCCAGTGAGGAATATTGGTCAATGGGCGAGAGCCTGAACCAGCC  
ATCCCGCGTGCAGGAAGAAGGCCCTATGGGTGTAAACTGCTTTTACGCAAGAAGAATGG  
TACCCTCGTGAGGGTATTTGACGGTACTGCGTGAATAAGCACCGGCTAACTCCGTGCCAG  
CAGCCGCGGTAATACGAGGGTGCAAGCGTTATCCGGATTTATTGGGTTTAAAGGGTTCG  
TAGGCGGTATTATAAGTCAGTGGTGAATCCTGCAGCTTAACTGTAGCATTGCCATTGAA  
ACTGCAGTACTTGAGTTATCTGAAGTAGGCGGAATGTGTAGTGTAGCGGTGAAATGCTT  
AGATATTACACAGAACACCGATTGCGAAGGCAGCTTACTAAGGGTACACTGACGCTGAGG  
CACGAAAGCGTGGGGATCGAACAGGATTAGATACCCGCGTAGTCC

>Otu3328

CCAGCCTACGGGTGGCACCAGTCGAGAATCTTCCGCAATGGGCGAAAGCCTGACGGAGCG  
ACGTTACGTGAATGAAGAAGCCCTTCGGGGTGTAAGTTCTTTTATGCGGGAAAAAGTTA  
TTGATTGTACCGCATGAATAAGGGGATCCTAATTCTGTGCCAGCAGGAGCGGTAAGACAG  
AATCCCCGAGCGTTACCCGGATTTATTGGGCGTAAAGGGTCTGTAGGTGGTTTGGTAAAGT  
TGAAAGTTAAAAATTCATCGGCTCAACCTTTGAAGTGCTTTCAATACTGCTAAACTAAGAG  
GGCATTAGGGGCTAACGGAACCGACGGAGTAGGGGTGAAATCCGTTGATATCGTCGGGAA  
CACCAAAAGCGAAGGCAGTTAGCTGGGATGACCCTGACACTGAGAGACGAAAGCGTGGGG  
AGCAAAAAGGATTAGATACCCCGTAGTCC

>Otu3330

CCAGCCTACGGGGTGCAGCAGTGAGGAATATTGGTCAATGGGGGCAACCCTGAACCAGCC  
ATGCCGCGTGAAAGGATGAAGGCCTTACGGGTTGTAAACTCTTTTATACGGGGCGAATTG  
TTTTTATGCGTAAAGACTTGACAGTACCGTACGAATAAGCATCGGCTAACTCCGTGCCAG  
CAGCCGCGGTAATACGGAGGATGCAAGCGTTATCCGGATTCACTGGGTTTAAAGGGTGAG  
TAGGCGGACTGATAAGTCAGTGGTGAAAGACTGTAGCTTAAGTATAGAAATGCCATTGAT  
ACTATCGGCCTTGAGTGAAGTTGAGGCAGGCGGAATGTGCAGTGTAGCGGTGAAATGCTT  
AGATATTGCACAGAACACCAATTGCGAAGGCAGCTTGCTAAACTTCTACTGACGCTGAGT  
CACGAAAGCGTGGGGATCAAACAGGATTAGATACCCCAGTAGTCC

>Otu3332

CCAGCCTACGGGTGGCTGCAGTGGGGAATATTGCGCAATGGGCGAAAGCCTGACGCAGCA  
ACGCCGCGTGAGTGAAGAAGGCCTTCGGGTTGTAAAGCTCTTTCGGTTGGGAAGAAGGGA  
ATGAGTGTTAATAGCGCTTGTTTTTGTATGGTACCAAAAGAAGAAGCACCAGGCTAACTTCG  
TGCCAGCAGCCGCGGTAATACGAAGGGTGCAGCGTTGTTTCGGAATTACTGGGCGTAAAG  
GGTTCGTAGGCGGGACATTAAGTCACATGTGAAATCCCCGAGCTTAAGTTCGGGACGTGCA  
TTTGAAACTGATGTTCTTGAGTATCGGAGAGGGTAGTGGAATTGCTGGTGTAGGAGTGAC  
ATCCGTAGAGATCAGCAGGAACACCGGAGGCGAAGGCGACTGCCTGGCCGATTACTGACG  
CTCATGTACGAAAGCGTGGGGAGCAAACAGGATTAGAAACCCCAGTAGTCC

>Otu3335

CCAGCCTATGGGGGGCAGCAGTAGGGAATATTGGTCAATGGGCGCAGCCTGAACCAGCC  
ATGCCGCGTGACAGGATGACGGCCTTATGGGTTGTAAAGCTGCTTTTGTACGGGAATAAATC  
TGATTACGTGTAATTAGTTGAAGGTACCGTAAGAATAAGCATCGGCTAACTCCGTGCCAG  
CAGCCGCGGTAATACGGAGGATGCAAGCGTTATCCGGATTCACTGGGTTTAAAGGGTGCG  
CAGGCGGACCGATAAGTCAGTGGTGAAATCTACGGCTCAACTGTAGAACTGCCATTGAT  
ACTGTTCGACTAGAGTATATTTGGAGTGGGCGGAATGTGTCATGTAGCGGTGAAATGCAT  
AGATATGACACAGAACACCGATCGCGAAGGCAGCTCACTAAGATACAAGTACGCTCATG  
CACGAAAGCGTGGGGATCAAACAGGATTAGATACCCCAGTAGTCC

>Otu3338

CCAGCCTACGGGGGGCAGCAGTGGGGAATTTTGCAGCAATGGGCGAAAGCCTGACGCAGCA  
ACGCCGCGTGAGTGATGAAGGTCTTCGGATCGTAAAGCTCTTTCGGCCGGGACGAAAACG  
GGTTCGGTGAATAGCCGGCTCCTTGACGGTACCGGAAGAAGAAGCACCAGGCTAACTCTGTG  
CCAGCAGCCGCGGTAATACAGAGGGTGCAGCGTTGTTTCGGAATTATTGGGCGTAAAGCG  
CGTGTAGGCGGCGAAGCATGTGCGGTGTGAAAGCCCTCGGCTTAACCGAGGAAGTGCGCC  
CGAAACTGCTTTGCTCGAGTGCTGGAGAGGGTAGCGGAATTCCTGGTGTAGAGGTGAAAT  
TCGTAGATATCGGGAGGAACACCAGTGGCGAAGGCGGCTACCTGGACGGACACTGACGCT  
GAGACGCGAAAGCGTGGGGAGCAAACAGGATTAGAAACCCTTGTAGTCC

>Otu3341

CCAGCCTACGGGTTGCTCCAGTGGGGAATTTTGGACAATGGGGGCAACCCTGATCCAGCG  
ACGCCGCGTGAGGACGAAGGTCTTCGGATTGTAAACTCCTTTTAGAGGGGATGAACGAC  
CTGGTGAATAGCCAGGCCTGACAGTACTCTTTGAATAAGCCACGGCTAACTACGTGCCAG  
CAGCCGCGGTAATACGTAGGTGGCAAGCGTTACTCGGAATCACTAGGCGTAAAGCGCAGG  
TAGGTGGTTTGGTAAGTCTTTTGTGAAAGCTCCTGGCTCAACTGGGAGAGGTCAAAGGAA  
ACTACCAGGCTAGAGTGTGGTAGGGGATACTGGAATTCCTGGTGTAGCGGTGAAATGCGT  
AGATATCAGGAGGAATACCTATGGCGAAAGCAGGTATCTGGGCCATCACTGACACTGAGC  
TGCGAAAGCTAGGGGAGCAAACAGGATTAGAGACCCCAGTAGTCC

>Otu3344

CCAGCCTATGGGGGGCAGCAGTGGGGAATTTTGGACAATGGGGGCAACCCTGATCCAGCG  
ACGCCGCGTGAGGACGAAGGTCTTCGGATTGTAAACTCCTTTTGGAGGGGAAGAATGCC  
TGCGTGAAAAACGCAGGGTGACGGTACCCTTCGAATAAGCCACGGCTAACTACGTGCCAG  
CAGCCGCGGTAATACGTAGGTGGCAAGCGTTACTCGGAATCACTAGGCGTAAAGCGCAGG  
TAGGCGGTTTCGATAAGTCTCTTGTGAAAGCTCCCGCTCAACTGGGAGAGGCCAAGGGAA  
ACTGTTCGAGCTAGAATGTGGCAGAGGAAGCTGGAATTCCTGGTGTAGCGGTGAAATGCGT  
AGATATCGGGAGGAACACCTATGGCGAAAGCAGGCTTCTGGGCCATCATTGACGCTGAGC  
TGCGAAAGCTAGGGGAGCAAACAGGATTAGAAACCCCAGTAGTCC

>Otu3346

CCAGCCTATGGGGTGCTCCAGTGGGGAATCTTGCACAATGGGGGAAACCCTGATGCAGCG  
ACGCCGCGTGAGCGATGAAGCCCTTCGGGGTGTAAAGCTCTTTCGACGGGAACGATAATG  
ACGGTACCCGAGAGAAGAAGCTGCGGCTAACTACGTGCCAGCAGCCGCGGTAATACGTAGG

CAGCGAGCGTTGTTTCGGAGTTACTGGGCGTAAAGAGTACGTAGGCGGTGCTCCAAGTCTG  
GTGTGAAATCTCCCGGCTTAACCGGGAGGGTGCGCCGGATACTGGAGTGCTTGAGTGTGG  
GAGAGGAAAGCGGAATTCCTGGTGTAGCGGTGAAATGCGTAGATATCAGGAGGAACACCG  
GTGGTGTAGACGGCTTTCTGGACCACTACTGACGCTGAGGCACGAAAGCGTGGGGAGCAA  
ACAGGATTAGATACCCCCGTAGTCC

>Otu3347

CCAGCCTACGGGGGGCAGCAGTGGGGAATCTTGCGCAATGGGCGAAAGCCTGACGCAGCA  
ACGCCGCGTGAGTGATGAAGGTCTTCGGATCGTAAAGCTCTGTGACAGGAAAGATGGGG  
AGCATGGCCAATATCCATGTTTCTTGACGGTACCTGTAAAGGAAGCACCGGCTAACTCTG  
TGCCAGCAGCCGCGGTAAAGACAGAGGGTGCGAGCGTTGTTTCGGAATTATTGGGCGTAAAG  
GGCGCGTAGGGGCGCCGTAAAGTCACGTGTGAAAGCCCAGGGCTTAACCCTGGAAGTGC GC  
GTGATACTGCGGTGCTTGAGTCTCGGAGAGGGTGGTGGAATTCACAGTGTAGAGGTGAAA  
TTCGTAGATATTGGGAGGAATACCGGTGGCGAAGGCGACCACCTGGACGAAGACTGACGC  
TGAGGCGCGAAAGCGTGGGGAGCAAACAGGATTAGATACCCTAGTAGTCC

>Otu3348

CCAGCCTATGGGGGGCAGCAGTGGGGAATTTTGCGCAATGGGGGAAACCCTGACGCAGCA  
ACGCCGCGTGAGTGATGAAGGCCTTCGGGTCTGTAAGCTCTGTGACAGGGAAAGAAGTGT  
AGGAGGGTTAATACCCCTTTTATTTGACGGTACCCTCAAAGGAAGCACCGGCTAACTCCG  
TGCCAGCAGCCGCGGTAAATACGAGGGGGCGAGCGTTGTTTCGGAATTATTGGGCGTAAAG  
GGTGCCTAGGCGGTTTGGTAAGTCTTCTGTGAAATCTATGGGCTCAACTCATAGACTGCA  
TGAGAAACTGCCGGGCTCGAGTATGGGAGAGGTGAGTGGAATTTCCGGTGTAGCGGTGAA  
ATGCGTAGATATCGGAAGGAACACCTGTGGCGAAAGCGGCTCACTGGACCATAACTGACG  
CTGATGCACGAAAGCTAGGGGAGCAAACAGGATTAGAAACCCCCGTAGTCC

>Otu3353

CCAGCCTATGGGTCGCAGCAGTGAGGAATATTGGGCAATGCCCCGAAAGGGTGACCCAGCA  
ACGCCGCGTGAGGATGACGGCCGTAAAGGTTGTAAACTCCTTTTGAGAGAGACGAATATC  
CATATTTTCGTAAGGAATATGGTTTGACTGTATCTCTAGAAGAAGCCCCGGCTAACTACGT  
GCCAGCAGCCGCGGTAAATACGTAGGGGGCAAGCGTTGTCCGGATTTACTGGGTGTAAAGG  
GCGCGTAGGCGGATTTGTAAAGTCAGTGGTGAAAGCCTGTAGCTTAACTACAGAACTGCCT  
CTGATACTGCAAACCTTGAGTTTCGGAAGAGAGAAGCGGAATTCAGGTGTAGTAGTGAAA  
TACGTAGATATCTGGAAGAACACCAGTGCGCAAGGCGGCTTCTTGGTCCGTAACCTGACGC  
TGAGGCGCGAAAGCGTGGGGAGCAAACAGGATTAGAGACCCTAGTAGTCC

>Otu3356

CCAGCCTACGGGTTGCTGTCAGTGGGGAATATTGGACAATGGGGGCAACCCTGATCCAGCA  
ATGCCGCGTGAATGAAGAAGGCCTTAGGGTTGTAAAGTTCTTTTGTGAGGGAAGATTATG  
ACGGTACCTGACGAATAAGTCCCGGCTAACTCCGTGCCAGCAGCCGCGGTAAATACGGAGG  
GGGCAAGCGTTGTTTCGGAATTACTGGGCGTAAAGGGTGTGTAGGCGGTACATCAAGTCAG  
ACGTGAAAGACCTAGGCTTAACCTAGGAGGTGCGTTTGAGACTGATGAACTTGAGATCGG  
GAGAGGAGAGTAGAATTCCAAGTGTAGAGGTGAAATTCGTAGATATTTGGAGGAATACCA  
GTGGCGAAGGCGGCTCTCTGGACCGAATCTGACGCTGAGGCACGAAAGCGTGGGGAGCAA  
ACAGGATTAGATACCCGGGTAGTCC

>Otu3357

CCGCCTATGGGGGGCTCCAGCTGGGAATCTTCTGCAATATACGAAAGTATGACAGAGCGA  
ACCAAAGTGTTTTCTCATTGAGAACTTTTGCCAAATCTAAAAAGTTTGCGAATAAGGAC  
TGGGCAAGACTAGTGCCAGCCGCCGCGGTAAATACTAGCTGTCCAAGTCGCAACCATCTTT  
ATTGGGTCTAAAACATCCGTAGCTTGTTTAGCAAGTTCTTGTGAAATCCTGTCTCTTAA  
GGTCAGGGCGCGCAAGGAGTACTACTAGGCTAGAGACTGGAAGACGTAAGAAGTACGTTT  
GAAGTAGCGGTTAAATGCGTTAATCTTAGACGGACTCACAACAGCGAAGGCATCTTACGA  
GGACAGTTCTGACAGTGAGGGATGAAGGCTCGGGGCGCAAAACGGATTAGATACCCGCGT  
AGTCC

>Otu3361

CCAGCCTATGGGGTGCTCCAGCCAAGAATCTTGGGCAATGGACGAAAGTCTGACCCAGCA  
ACGCCGCGTGAAGGATTAAGGTCTTCGGATTGTAAACTTCTGTGACAGGGGACGAAGGTG  
TGCAGGCAAACAGTCTGTACAGTTGACGGTACTCTCAAAGGAAGCCCCGGCTAATTACGT  
GCCAGCAGCCGCGGTAAAGACGTATGGGGCAAGCGTTGCTCGGATTAACCTGGGCGTAGAGG  
GTGCGTAGGCGGTATTGAAAGTCAAATGTGAAATACCACGGCTCAACTGTGGGTCCGCAT  
TTGAAACTTCGATACTTGAGTTTCAGGTGAGGAGAATGGAATTCAGGTGTAGGGGTGAAA  
TCTGTAGATATCTGGAAGAACACCAGTGCGTAGGCGATTCTCTAACTTGATACTGACGC

TGAGGCACGAAAAGCATGGGGAGCAAACAGGATTAGAAAACCTGGTAGTCC

>Otu3362

CCAGCCTATGGGGGGCTGCAGTCGAGGATCTTCGGCAATGGGCGCAAGCCTGACCGAGCG  
ACGCCGCGTGCGGGATGAAGGCCTTCGGGTGTAAACCGCCGTCGGAGGGGAGGAAATAC  
TAGGGGGTACTCTTCCTAGTTTGACCTATCCTCAGAGGAAGTACGGGCTAAGTTCGTGCC  
AGCAGCCGCGGTAATACGAACCGTACAAACGTTATTTCGGAATCACTGGGCTTAAAGGGTG  
CGTAGGCGGCCCCGAAAGTTGGGTGTGAAAGCCCTCGGCTCAACCGAGGAATTGCGCCCA  
AAACTACCGGGCTTGAGGGAGACAGAGGTAAAGCGGAACCTAGGGTGGAGCGGTGAAATGC  
GTTGATATCCTAAGGAACACCAGGAGCGAAAGCGGCTTACTGGGTCTCTTCTGACGCTGA  
GGCACGAAAGCTAGGGGAGCGAACGGGATTAGAGACCCTCGTAGTCC

>Otu3364

CCAGCCTATGGGGGGCAGCAGTTAAGAATATTCCTCAATGGCCGAAAGGCTGAAGGAGCG  
ACGCCGCGTGCGGGATGAAGGGCTTCGGCTCGTAAACCGCTTTTATTTGGGAAGAATTCT  
GACGGTACCAAAATGAATAAGAGGTTGCTAACTCTGTGCCAGCAGCAGCGGTAATACAGAG  
ACCTCAAACGTTGTCCGGATTTATTGGGCGTAAAGGGTCCGCAGGTGGCCGTGCGCGTCG  
GGAGTTAAATGTCGGGGCTCAACTCCGACACCGCTCTCGATACGGCATGGCTAGAGGCCG  
GAAGAGGCACACGGAATTGCCGGTGTAGTAGTAATATGCGTTAATATCGGCAAGAACACC  
AAATGCGAAGGCAGTGTGCTAGGACGGTTCTGACACTCAGGGACGAAAGCGTGGGGAGCG  
AAAGGGATTAGAAAACCTAGTAGTCC

>Otu3365

CCAGCCTACGGGTGGCAGCAGTGGGGAATATTGGACAATGGGCGCAAGCCTGATCCAGCC  
ATGCCGCGTGAGTGATGAAGGCCTTAGGGTTGTAAAGCTCTTTCGCAGGTGAAGATAATG  
ACGGTAACCTGAGAAGAAGCCCCGGCTAACTTCGTGCCAGCAGCCGCGGTAATACGAAGG  
GGGCTAGCGTTGTTCCGAATTACTGGGCGTAAAGCGCACGTAGGCGGATATTCAAGTCAG  
GGGTGAAATCCCCGGGGCTCAACCCCGGAAC TGCCCTTGATACTGGGTATCTTGAGTGTAG  
GAGAGGTGAGTGGAATTCGAGTGTAGAGGTGAAATTCGTAGATATTTCGGAAGAACACCA  
GTGGCGAAGGCGGCTCACTGGCCTACAACCTGACGCTGAGGTGCGAAAGCGTGGGGAGCAA  
ACAGGATTAGAAAACCTGGTAGTCC

>Otu3367

CCAGCCTATGGGAGGCACCAGTTTCAAATCATTACACAATGGGCGAAACCTGATGCAGCA  
ACGCCGCGTGAGTGATGACGGTCTTCGGATTGTAAACTCTGTCTTCAGGGACGATAATG  
ACGGTACCTGAGGAGGAAGCCACGGCTAACTACGTGCCAGCAGCCGCGGTAATACGTAGG  
TGGCAAGCGTTGTCCGATTTACTGGGCGTAAAGGGAGCGTAGGTGGATATTTAAGTGGG  
ATGTGAAATACTCGGGCTTAACCTGAGTGCTGCATTCCAAACTGGATATCTAGAGTGCAG  
GAGAGGAAAGTAGAATTCCTAGTGTAGCGGTGAAATGCGTAGAGATTAGGAAGAATACCA  
GTGGCGAAGGCGACTTTCTGGACTGTAACCTGACACTGAGGCTCGAAAGCGTGGGGAGCAA  
ACAGGATTAGAAAACCTCGTAGTCC

>Otu3368

CCAGCCTACGGGGCGCACCAGTGGGGAATCTTGCAACAATGGGGGAAACCTGATGCAGCG  
ACGCCGCGTGAGCGATGAAGCCCTTCGGGGTGTAAAGCTCTTTCGTGGGGACGATAATG  
ACGGTACCCGGAGAAGCAGCTGCGGCTAACTACGTGCCAGCAGCCGCGGTAACACGTAGG  
AGACGAGCGTTATCCGATTTACTGGGCGTAAAGCGCGTGCAGGCGGTTTGGTAAGTTGG  
ATGTGAAAGCTCCCGGCTTAACCTGGGAGAGGTGCTTCAATACTGCCAGACTAGAGGATGG  
TAGAGGGAGGTGGAATTCCTGGGTGTAGTGGTGAAATGCGTAGATATCCAGAGGAACACCA  
GTGGCGAAGGCGCCTCCTGGACCATTTCTGACGCTCATACGCGAAAGCTAGGGTAGCAA  
ACGGGATTAGATACCCCGGTAGTCC

>Otu3370

CCAGCCTACGGGAGGCAGCAGTAGGGAATTTTTCGCAATGGGGGAAACCTGACGCAGCA  
ACGCCGCGTGGGTGATGAAGGTCTTCGGATTGTAAAGCCCTGTCTTTTGGGACGATAATG  
ACGGTACCAAAGGAGGAAGCCACGGCTAACTACGTGCCAGCAGCCGCGGTAATACGTAGG  
TGGCAAGCGTTGTCCGATTTACTGGGCGTAAAGGGTGCCTAGGTGGATATTTAAGTCAG  
ATGTGAAATCCCCGGGCTTAACCTGGGAAGTGCAATTTGAAACTGGATATCTTGAGTGCAG  
GAGAGGTAAGTGGAATTCCTAGTGTAGCGGTGAAATGCGTAGATATTAGGAAGAACACCG  
GTGGCGAAGGCGACTTACTGGACTGTAACCTGACACTGAGGCACGAAAGCGTGGGTAGCAA  
ACAGGATTAGATACCCACAGTAGTCC

>Otu3372

CCAGCCTATGGGGTGCAGCAGTGGGGAATTCGCGCAATGGACGAGAGTCTGACGCAGCA  
ACGCCGCGTGGGTGATGAAGGTCTTCGGATCGTAAACCCCTGTCTGTCAGGGACGAAGGTT

GCGAGTTTAAAGAGATGCGCAGCTTGACGGTACCTGGAGAGGAAGCCCCGGCTAACTCTGT  
GCCAGCAGCCGCGGTAATACAGAGGGGGCAAGCGTTATTTCGGAATTATTGGGCGTAAAGG  
GCGCGTAGGCGGTGTTATAAGTCAGATGTGTAATCCCCGAGCTCAACTTGGGAAGTGCAT  
CTGAGACTGTAGTACTAGAGTGCTGGAGAGGGTGGTAGAATTCACGTGTAGCGGTGAAA  
TGCGTAGAGATGTGGAGGAATACCAGTGGCGAAGGCGGCCACCTGGACAGTGAAGTACGC  
TGAGGCGCGAAAGTGTGGGTAGCAAACAGGATTAGAAACCCGGGTAGTCC

>Otu3373

CCAGCCTATGGGGCGCAGCAGTCGAGAATCTTCCGCAATGGGCGAAAGCCTGACGGAGCA  
ATGCCGCGTGCAGGATGAAGGCCTTCGGGTCTGTAAGCTGCTGTCACCGGGGATGAATAAT  
GACAGTACCCGGGGAGGAAGTCACGGCTAACTACGTGCCAGCAGCCGCGGTAATACGTAG  
GTGTCGAGCGTTGTTTCGGATTATTGGGCGTAAAGGGTTCGTAGGATGTTTATTAAGATT  
GGTGTGAAATCCCAAGGCTCAACCTTGGAAGTGCATTGATTACTGATGAAGTACAGTATC  
GTAGAGGAAAGCGGGATTCCAGGTGTAGCGGTGGAATGCGTAGATATCTGGAAGAACACC  
GACAGCGAAGGCAGCTTTCTGGGCGATAACTGACTCTGAGGAACGAAAGCATGGGGAGCA  
AACAGGATTAGAGACCCCCGTAGTCC

>Otu3378

CCAGCCTATGGGGTGCAGCAGTGGGGAATATTGGACAATGGGGGCAACCCTGATCCAGCA  
ATGCCGCGTGGGTGAAGAAGGTCTTCGGATTGTAAAGCCCTTTTCGGCGGGGACGATGATG  
ACGGTACCCGCGAGAAGAAGCCCCGGCTAACTTCGTGCCAGCAGCCGCGGTAATACGAAGG  
GGGCTAGCGTTGCTCGGAATGACTGGGCGTAAAGGGCGCGTAGGCGGTTGTATCAGTCAG  
ACGTGAAATTCCTGGGCTTAACCTGGGGGCTGCGTTTGAGACGGTATAACTTGAGTGAGG  
AAGAGAGTCGTGGAATTCACAGTGTAGAGGTGAAATTCGTAGATATTGGGAAGAACACCG  
GTGGCGAAGGCGGCGACCTGGTCCTTTACTGACGCTGAGGCGCGAAAGCGTGGGGAGCAA  
ACAGGATTAGAAACCCCTGTAGTCC

>Otu3379

CCAGCCTATGGGTCGCAGCAGGTAGGGAAAATTTCCAATGCGCGCAAGCGTGAGAAAGCG  
AGCCAGAGTGTGTTCTCTAAATTTGGAATAACTTTTGTCTGTTACAAAAAGACAGGCGAA  
TAAGGAGTGGGCAAGACCGGTGCCAGCCGCGCGGTAATCCCGGCGCTCCGAGTGCAGC  
CACAAATTATTGGGTCTAAGACATTTCGTAGCTTGTTTTGTAAGTTTCTTGTGAAATTCTAA  
ATCTTAAATTTAGAGCGTGCAAGAAATACTGCTTAACTTGGGACTGGTAGAAGTAAGGAG  
TACAATCAAGGTAGTAGTAAAATACGTTAATCTTAATTGGACTAACAAGAGCGAAGGCAC  
CTTACTAGCACAGATCTGACAGTGAGGAATGAAGGCTAGGGTCGCGAAACGGATTAGAAA  
CCCTAGTAGTCC

>Otu3380

CCAGCCTACGGGTGGCAGCAGTAGGGAATTTTGCGCAATGGACGAAAGTCTGACGCAGCA  
ACGCCGCGTGAGTGATGAAGGCCTTCGGGTCTGTAAGCCCTGTCAGGTGGGAAGAATGAT  
TCGGGTATGAATAATGCTCGAATGTGACGGTACCACCAGAGGAAGCACCGGCTAACTCCG  
TGCCAGCAGCCGCGGTAATACGGAGGGTGAAGCGTTATTTCGGAATTACTGGGCGTAAAG  
CGCGTGACAGGCGGGCGAGCAAGTCTGATGTGAAAGCCCCGGGCTTAACCTGGGAAGTGCA  
TTGGAAGTGCCTCGTCTTGAGTTGCGGAGAGGAAGGGGGAATTTCCCGGTGTAGAGGTGAA  
ATTCGTAGAGATCGGGAGGAATACCAGTGGCGAAGGCGCCCTTCTGGACGACAAGTACG  
CTGAGACGCGAAAGCGTGGGGAGCAAACAGGATTAGAAACCCCTCGTAGTCC

>Otu3383

CCAGCCTATGGGTGGCAGCAGTAACGAATCATGGGCAATGGGCGAAAGCCTGACCCCTGCG  
ACGCCGCGTGCGGGATGAAGTTCTTCGGAATGTAAACCGCTGTCAGGGGTTACCAAGCAA  
ACGGGCCTAACACGCTCGCGCGTTGAGGAGCCCCAGAGGAAGCCACGGCTAACTTCGTGC  
CAGCAGCCGCGGTAAAGACGAAGGTGGCAAGCGTTGTTTCGGAATCACTGGGCTTAAAGAGC  
ACGTAGGCGGGCCGTCTTGCGCTTTGTGAAATCCCCGGGCTCAACCGGGGAATTGCAGGG  
CGAACGGGCGGTCTTGAGGCAGGTAGAGGTGTGGGGAACTCTTGGTGGAGCGGTGGAATG  
CGTAGATATCAAGAGGAACGCCGGAGACGAAGGTGCCGCACTGGGCCTGTCCTGACGCTG  
AGGTGCGAAAGCCAGGGGAGCAAACGGGATTAGAAACCCCTAGTAGTCC

>Otu3384

CCAGCCTACGGGTCGCTGCAGTGGGGAATATTGGACAATGGGCGCAAGCCTGATCCAGCC  
ATGCCGCGTGAGTGAAGAAGGCCTTAGGGTTGTAAATTCCTTTTGGCGGGGACGATAATG  
ACGGTACCCGCGAGAATAAGCCCCGGCTAACTTCGTGCCAGCAGCCGCGGTAATACGAGGG  
GGGCGAGCGTTGTTTCGGAATTATTGGGCGTAAAGGGTTCGTAGGCGGTTTTGTAAAGTCTT  
GTGTGAAATCTTCAGGCTCAACTTGAAGACTGCACGAGAACTGCAGGGCTTGAGTGTGG  
GAGAGGTGAGTGGAATTCCTGGTGTAGCGGTGAAATGCGTAGATATCAGGAGGAACACCT

GTGGCGAAAGCGGCTCACTGGACCACAACCTGACGCTGATGCACGAAAGCTAGGGGAGCAA  
ACAGGATTAGAAACCCGAGTAGTCC

>Otu3393

CCAGCCTATGGGGCGCAGCAGTGGGGAATATTGGGCAATGGGCGAAAGCCTGACCCAGCG  
ACGCCGCGTGGGCGATGAAGGCCTTCGGGTGTAAAGCCCTTTCGTGCGGAAAGAACAGT  
CTCGTGGCTAATATCCACGGGATTTGACGGTACCGCAGGAAGAAGCACCGGCTAACTCCG  
TGCCAGCAGCCGCGGTAATACGGAGGGTGCAGCGTTGTTTCGGAATTATTGGGCGTAAAG  
GACGCGTAGGCGGTAATGAAAGTCAGATGTGAAATACTTCGGCTCAACTGAAGAACTGCA  
TCTGAAACTTCATACTAGAGTACAGAAGAGGGGAAACGGAATTCCCGGTGTAGAGGTGAA  
ATTCGTAGATATCGGGAGGAACACCAGTGGCGAAGGCGGTTTCCTGGTCTGATACTGACG  
CTGAGGCGTGAAAGTGTGGGGAGCAAACAGGATTAGAACCCCACTAGTCC

>Otu3394

CCAGCCTATGGGGGGCTCCAGTGGGGAATATTGGACAATGGGCGAAAGCCTGATCCAGCC  
ATGCCGCGTGAATGGTGAAGGCCCTAGGGTCGTAAAGTTCTTTTGTGAGGGAAGATAATG  
ACGGTACCTGAAGAATAAGCACCGGCTAACTTCGTGCCAGCAGCCGCGGTAATACGAAGG  
GTGCTAGCGTTGTTTCGGAATTACTGGGCGTAAAGCGCGCGTAGGCGGGCTAACAAGTCAG  
AGGTGAAATCCCAGGGCTCAACCCTGGAAGTGCCTTTGAAACTGTTAGCCTGGAGTGTGT  
GAGGGGATAGCGGAATTCCTAATGTAGAGGTGAAATTCGTAGATATTAGGAGGAACACCG  
GTGGCGAAGGCGGCTATCTGGCACACAACCTGACGCTGAGGCGCGAAAGCGTGGGGATCAA  
ACAGGATTAGAAACCCCTGGTAGTCC

>Otu3395

CCAGCCTATGGGTTGCTGCAGTCGGGAATTTTGGACAATGGGGGAAACCCCTGATCCAGCG  
ACGCCGCGTGCAGGATGACGTTCTTCGGAATGTAAACTGCTGTGCGGGCGGGACGAACGTC  
TTTCGAGCTAATATCTCGAGAGAGTGACGGTACCGCCGAAGGAAGCACCGGCTAACTCTG  
TGCCAGCAGCCGCGGTAATACAGAGGGTGAAGCGTTGTTTCGGAATTGACTGGGCGTAAAG  
GGCGCGTAGGTGGTTAGGTAAGTCCGTTGTGAAATCAACATCGCTTAACGAGTTGTCCGC  
ATCGGAAACTGTCTAACTTGAGTATTGGAGAGGATAACGGAATTCCTGGTGTAGCGGTGG  
AATGTGTAGAGATCAGGAGGAACACCTGTGGCGAAGGCGGTTATCTGGCCAAATACTGAC  
ACTGAGGCGCGAAAGCTAGGGGAGCAAACGGGATTAGATACCCCTTGTAGTCC

>Otu3398

CCAGCCTATGGGTTGCTCCAGTGGGGAATATTGGACAATGGGCGAAAGCCTGATCCAGCA  
ATGCCGCGTGTGTGAAGAAGGTCTTAGGATTGTAAAGCACTTTCGACGGGGACGATGATG  
ACGGTACCCGTAGAAGAAGCCCCGGCTAACTTCGTGCCAGCAGCCGCGGTAATACGAAGG  
GGGCTAGCGTTGCTCGGAATGACTGGGCGTAAAGGGCGCGTAGGCGGAGTTATCAGTCAG  
ACGTGAAATTCCTGGGCTTAACCTGGGGGCTGCGTTTGATACGGTAAGTCTAGAGTGAGG  
AAGAGGGTTGTGGAATTCACAGTGTAGAGGTGAAATTCGTAGATATTGGGAAGAACACCG  
GTGGCGAAGGCGGCAACCTGGTCCTTTACTGACGCTGAGGCGCGAAAGCGTGGGGAGCAA  
ACAGGATTAGATACCCGAGTAGTCC

>Otu3405

CCAGCCTATGGGGGGCTGCAGTCGAGAATCTTCCGCAATGGACGAAAGTCTGACGGAGCG  
ACGTTACGTGAATGAAGACGCCCTTCGGGGTGTAAAGTTCTTTTCTCTGGGAGGAAGCCG  
CAAGGCAGACAGTACCAGAGGAATAAGGGGATCCTAATTCTGTGCCAGCAGGAGCGGTAA  
GACAGAATCCCCAAGCGTTACCCGATTTATTGGGCGTAAAGGGTTCGTAGGTGGTACAG  
TAAGTTGAAAGTTAAACTCATCGGCTTAACCTTTGAGGTGCTTTCAAACCTGCTGAACT  
TGAGGGCGTTAGGGGTTAGCGGAACCGACGGAGTAGGGGTGAAATCCGTTGATATCGTCG  
GGAACACCAAAAAGCGAAGGCAGCTAACTAGGACGACCCTGACACTGAGGAACGAAAGCGT  
GGGGAGCAAAAAGGATTAGAACCCTCGTAGTCC

>Otu3413

CCTATGGGGGGCTGCAGAGGAGGATCATTCGCAATGGGCGCAAGCCTGACGGTGCAGCGC  
CGCGTGAGGGATGAAGGCCTTCGGGTGTAAACCTCTGTGAGGAGTTATGAACGGCGGGG  
GCGTTAACACCGCCTCCGTGTGACAAAGGCTCCAAAGGAAGCCACGGCTAACTACGTGCC  
AGCAGCCGCGGTAATACGTAGGTGGCAAGCGTTACTCGGAATCACTGGGCATAAAGGGCG  
TGTAGGCGGATGTGTAAGTCCGGTGTAAAGCCCCCGGCTCAACCGGGGAAGGCCATCGG  
ATACTGCGCGTCTAGAGTGCGGGAGGGGAGAGTGGAACCTCTTGGTGGAGCGGTGAAATGC  
GTAGATATCAAGAGGAACGCCGTTGGCGAAAGCGGCTCTCTGGCCCCGTTACTGACGCTGA  
GGCGCGAAAGCTAGGGGAGCAAACGGGATTAGAAACCCCACTAGTCC

>Otu3415

CCAGCCTATGGGGGGCACCAAGTCGAGAATATTTCGTCAATGCGCGAAAGCGTGAACGAGCG

ATGCCGCGTGCGGGATGAAGGCCTTCGGGTTGTAAACCGCTTTTGTATAGGAAGAATTTA  
GATGACGGTACTATGCGAATAAGAGGTTACTAACTCTGTGCCAGCAGTAGCGGTAATACA  
GAGACCTCAAGCGTTATCCGGATTTATTGGGCGTAAAGAGCTGGTAGGTGGTCATATTAG  
TCAGATGTCAAATCTCGGGGCTCAACTCCGAACTGCATTTGAAACGGTATGACTAGAGG  
GTGTGAGAGATCACTGGAACCTCATGGTGTAGCAGTGAAATGCGTTGATATCATGGGGAAC  
ACCAAAGGCGAAGGCATGTGATTGGCACACTCCTGACACTGAGCAGCGAAAGCGTGGGTA  
GCGAATGGGATTAGAAACCCTAGTAGTCC

>Otu3420

CCAGCCTACGGGGGGCAGCAGTGGGGAATTTTCCGCAATGGGCGAAAGCCTGACGGAGCA  
AGACCGCGTGGGGGAGGAAGGTATATTTATTGTAAACCCCTTTTCCAAGGAAAGAAAAAA  
ATGACGGTACCTTGGGAATAAGCATCGGCTAACTCTGTGCCAGCAGCCGCGGTAATACAG  
AGGATGCAAGCGTTATCCGGAATTATTGGGCGTAAAGAGTCCGTAGGGGGCTCATCAAGT  
CTGTCTGTTAAAGCCCACAGCTTAACTGTGGTCAAGCGAGGGAACTGAAGAGCTAGAGAG  
CAGTAGGGGCAGAGGGAATTCTCAGTGTAGCGGTGAAATGCGTAGAGATTGGGAAGAACA  
TCGGTGGCGAAAAGCGCTCTGCTGGGCTGAATCTGACCCTGAGGGACGAAAGCTAGGGGAG  
CAAAAGGGATTAGATACCCGCGTAGTCC

>Otu3422

CCAGCCTATGGGGGGCTCCAGTAAGGAATATTGCGCAATGGGCGCAAGCCTGACCGAGCG  
ACGCCGCGTGTGGGATGAAGGCCTTCGGGTTGTAAACCACTGTCAGAGGGGATGAAATGC  
GTAGGGGTTCTCTCCTACGTTTGACATAGCCTCAGAGGAAGTACGGGCTAAGTTCGTGCC  
AGCAGCCGCGGTAAGACGAACCGTACAAACGTTATTTCGGAATCACTGGGCTTAAAGGGTG  
CGTAGGCGGCGGCGCAAGTTGGGTGTGAAATCCCTCGGCTCAACCGAGGAACTGCGCTCA  
AAACTGCGTTGCTTGAGGGAGATAGAGGTGAGTGGAACCTTAGGGTGGAGCGGTGAAATGC  
GTTGATATCCTAAGGAACACCAGTGGCGAAAGCGACTCACTGGGTCTCCACTGACGCTGA  
GGCACGAAAGCTAGGGTAGCGAACGGGATTAGATACCCTGGTAGTCC

>Otu3427

CCAGCCTACGGGTCGCTGCAGTCGAGAATCTTCGGCAATGGGCGCAAGCCTGACCGAGCG  
ACGCCGCGTGTGGGATGAAGGCCTTCGGGTTGTAAACCGCTGTCAGTGGGGAGGAAATGC  
GGGAGGGAACTCCCTTCCGTTTGACCTATCCGCAGAGGAAGTACGGGCTAAGTTCGTGCC  
AGCAGCCGCGGTAATACGAACCGTACGAACGTTATTTCGGAATTACTGGGCTTAAAGGGTG  
CGTAGGCGGCTCAGAAAGTTGGGTGTGAAAGCCCTCGGCTCAACCGAGGAACTGCGCCCA  
AACTACTGAGCTCGAGGGAGACAGAGGTGAGTGGAACCTTAGGGTGGAGCGGTGAAATGC  
GTTGATATCCTAAGGAACACCAGTGGCGAAAGCGACTCACTGGGTCTCTTCTGACGCTGA  
GGCACGAAAGCTAGGGGAGCGAACGGGATTAGAGACCCCCGCTAGTCC

>Otu3438

CCAGCCTACGGGGTGCTCCAGTGAGGAATATTGGTCAATGGGGGCAACCCTGAACCAGCC  
ATGCCGCGTGAAGGAAGAAGGCCCTAAGGGTTGTAAACTTCTTTTGTACGGGGGTAAACT  
CTTCTACGAGTAGGAGATTGAAAGTACTGTACGAATAAGCAACGGCTAACTCCGTGCCAG  
CAGCCGCGGTAATACGGAGGTGCAAGCGTTATCCGGATTTATTGGGTTTAAAGGGTGCG  
TAGGCGGGCTTATAAGTCAGCGGTGAAAGACTGTCGCTTAACGATAGCATTGCCGTTGAT  
ACTGTAGGCCTTGAGTACGTTTGAGGTGGGCGGAATGTGTAGTGTAGCGGTGAAATGCTT  
AGATATTACACAGAACACCAATTGCGAAGGCAGCTCACTAACTGTCACTGACGCTGAGG  
CACGAAAGCGTGGGGATCAAACAGGATTAGAAACCCGCGTAGTCC

>Otu3441

CCAGCCTACGGGGGGCAGCAGTGAAGGAATTTTGGACAATGCCCGAAAGGGTGATCCAGCG  
ACACCGCGTGAGTGATGAAAGCTTTCGAGTTTAAACTCTGTCAAGCGGGAAGAAAAAA  
CGATTATATCGGAATTGACGGTACCGCTGAAGGAAGCCCCGGCTAATCCCGTGCCAGCAG  
CCGCGGTAATACGGGAGGGGCAAACGTTACTCGGATTTACTGGGTGTAAAGGGTTCGTAA  
GTTGTTTATAAAGTCAAATCTTAAATATTTACGCTTAACTGAAAAAGCGATTTGAAACTG  
TTAGACTAGAGTACGAAGGAGGAAAGTGGAACCTGCCGGTGTAGCGGTGAAATGCGTAGAT  
ATCGGCAGGAACACCAATTGCGAAGGCTACTTTCTATTTTCGATACTGACACTGAGGAACG  
AAAGCATGGGGAGCGATCGGGATTAGATACCCTTGTAGTCC

>Otu3442

CCAGCCTATGGGAGGCACCAGTCGAGAATATTCCGCAATGGGCGAAAGCCTGACGGAGCG  
ACGCCGCGTGGTTGATGAAGTCCTTCGGGATGTAAAAACCTTTTATGATCTACTAAGTTT  
ATTGAAGAGATCATGAATAAGAGGTTGCTAAACTCGTGCCAGCAGCAGCGGTAATACGAG  
TGCCCTCGAGCGTTATCCGGAATCATTGGGCGTAAAGGGTGTGTAGGAGGTTGTGTTAGTC  
TTCTGTTAAATTCTTCGGCTTAACCGGGGACTCGCGGGTGATACGGCGCAACTAGAGGAT

GCGAGAGGTGAGTGGAACTCATAGTGTAGGGGTGAAATCCGTTGATATTATGGGGAACAC  
CAAATGCGAAGGCAGCTCACTGGCGCACTCCTGACTCTGAAACACGAAAGCGTGGGTAGC  
GAATGGGATTAGATACCCGAGTAGTCC

>Otu3444

CCAGCCTATGGGTGGCAGCAGGCGCGAAACCTCCACAATGCGCGTAAGCGCGATGGGGGG  
AGTCTGATTGGCGTACTTTCGGTATGCCTTTTGCTAAGTCTAAATCGCTTGGCGAATAAGT  
GCTGGGCAAGACCGGTGGCAGCCGCCACGGTAATACCGGCGGCACTAGTGGTGTCCGCGA  
TTATTGGGCTTAAAGGGTCAGTAGCCTGCTGGAACCGTCCCACGTGAAATGTTAGCGCCT  
AACGCTAACGCGGGCGTGGGATACCTTCCGGCTAGGGAGTGGAAGAGGTCAGGGGTACTT  
GTGGGGTAGGGGTAAAATCCTGTAATCCTATAAGGACCACCGGTGGCGAAGGCGCCTGAC  
CAGGACATATCCGACGGTGAGTGGCTAAGGCTAGGAGAACGAATCGGATTAGAGACCCGA  
GTAGTCC

>Otu3447

CCAGCCTATGGGGTGCTGCAGTCGAGAATTTTTTACAATGGGCGAAAGCCTGATGGAGCG  
ACGCCGCGTGGGGGATGAATGGCTTCGGCCCGTAAACCCCTGTCATTCGGGAGCAATGCG  
TCTGGGTGAACATCCCAGACGTTGATAGTACCGGAAGAGGAAGGGACGGCTAACTCTGTG  
CCAGCAGCCGCGTAATACAGAGGTCCCAAGCGTTGTTTCGGATTTACTGGGCGTAAAGGG  
TGCGTAGGCGGTGAGATAAGTCTGATGTGAAATCTCCGGGCTTAACCCGAAAATGCATT  
GGAAACTATCTGACTCGAGAGTTGGAGGGGGGACTGGAATACTTGGTGTAGCAGTGAAAT  
GCGTAGATATGAAGTGGAACACCAGTGGCGAAGGCGAGTCCCTGGACAACCTTCTGACGCT  
GAGGCACGAAAGCTAGGGGAGCAAACAGGATTAGAAACCCCGGTAGTCC

>Otu3452

CCAGCCTATGGGGCGCAGCAGTAACGAATCTTCCGCAATGCACGAAAGTATGACGGAGCG  
ACGCCGCGTGTGGGACGAAGTCTTCGGAATGTAAACCACTGTCAGGGGTTAGAAAGTTC  
TGATCAACCCAGAGGAAGGCACGGCTAACTCTGTGCCAGCAGCCGCGGTAAGACAGAGG  
TGCCAAGCGTTAGGCGGAATCACTGGGCTTAAAGCGTGTGTAGGCGGATTGACAAGTACT  
TTGTGAAATCCCACGGCTTAACCGTGGAACGCTCGGTATACTGTCAGTCTTGAGCTATC  
TAGAGGCAACTGGAACAAACGGTGGAGCGGTGAAATGCGTAGATATCGTTTGAATGCCA  
AAGGTGAAAACAGGTTGCTGGGGATATGCTGACGCTGAGACACGAAAGCCAGGGGAGCAA  
ACGGGATTAGAAACCCCTGTAGTCC

>Otu3453

CCAGCCTACGGGGGGCACCAGTAAGGAATATTGGACAATGGGGGAAACCCTGATCCAGCA  
ATGCCGCGTGAATGAAGAAGGCCTTCGGGTGTAAAGTCTTTTCGCTCGCGAAGATAGTG  
ACGGTAGCGAGATAAGAAGGTCCGGCTAACTCTGTGCCAGCAGCCGCGGTGAGACAGAGG  
GACCTAGCGTTGTTTCGGAATGACTGGGCGTAAAGGGTGCGTAGGTGGTTGTTTAAGTAGA  
GTGTAAGGCCAGGCTTAACCTGGGAACAGCATTCTATACTGGACGACTAGAGTATGG  
GAGAGGAAAGTGGAATTCCTAGTGTAGAGGTGAAATTCGTAGATATTAGGAGGAACACCA  
GAGGCGAAGGCAACTTTCTGGTCCATAACTGACACTGAGGCACGAAAGCGTGGGGAGCAA  
ACAGGATTAGATACCCTTGTAAGTCC

>Otu3457

CCAGCCTACGGGGCGCTGCAGCTAAGAATCTTCCGCAATGGGGGAAACCCTGACGGAGCG  
ACGCCGCGTGGATGATGAAGGCCGTAAGGTTGTAAATCCTTTTGTGCGGTGAAGAATAAG  
GGAGGGAGTGGAAGCCCTCCTGATGACGTTAGCCGGCGAATAAGCCCCGGCTAATTACG  
TGCCAGCAGCCGCGGTAATACGTATGGGGCAAGCGTTGTTTCGGATTTATTGGGCGTAAAG  
GGCGTGTAGGCGGCTCATCAAGTCTGGTGTGAAATCGCAGGGCTTAACCCTGCATATGCG  
CTGGAAACTGGTGGGCTTGAGTTCTTGAGGGGAAGCTGGAATTCCAGGTGTAGGGGTGAA  
ATCTGTAGAGATCAGGAAGAATACCAGTGGCGAAGGCGAGCTCCTGGCCAATGATTGACG  
CTGAGGTGCGAAAGTGTGGGGATCAAACAGGATTAGAAACCCGGGTAGTCC

>Otu3462

CCAGCCTATGGGGGGCACCAGTAAGGGATATTGCGCAATGGGCGAAAGCCTGACGCAGCA  
ACGCCGCGTGGAGGAAGAAGGTCTTCGGATTGTAAACTCCTTTTAGTTGGGACGAGCAAG  
GACGGTACCAACAGAATAAGCCTCGGCTAACTACGTGCCAGCAGCCGCGGTAAAACGTAG  
GAGGCGAGCGTTATCCGGATTTACTGGGCTTAAAGGGTGTGCAGGCGGATGATTAAAGTCG  
TGCATGAAAGCCGTGCGCTCAACGCGCGGAGGCTGTGCGATACTGGTCTGTCTAGGGTATG  
CGAGAGGGATGCGGAATTCCGGGTGTAGTGGTGAATGCGTAGATATCCGGAAGAACACC  
AGAGGCGAAGGCGGCATCCTGGCGCATTAAGTACGCTGAGACACGACAGCATGGGGAGCG  
AACGGGATTAGATACCCTCGTAGTCC

>Otu3471



CCAGCACGGGGGGCTGCAGTCGAGGATTTTTCTCAATGGGGGAAACCCTGAAGGAGCGAC  
GCCGCGTGGGGGATGAAGGTCTTCGGATTGTAAACCCCTGTCATCTGGGATCAAAGCGCA  
CGACCCAATACGTCGTGTGTTGATAGTACCGGAAGAGGAAGCCGTGGCTAACTCTGTGTC  
AGCAGCCGCGGTAATTACAGAGACGGCGAGCGTTGTTTCGGATTTCATTGGGCGTAAAGGGTG  
CGCAGGCGGGCCAGCAAGTCGGATGTGAAATCTCATAGCCTAACTATGAGCGGTTCATTG  
AAGCTGCTGGGCTCGAGGACTGGAGAGGAGACTGGAATTGTGGTGTAGCGGTGAAATGC  
GTAGAGATCGACAAGAACACCGGTGGCGAAGGCGGGTCTCTGGACAGTTCCTGACGCTCA  
GGCACGAAAGCCAGGGGAGCAAACGGGATTAGATACCCGCGTAGTCC

>Otu3472

CCAGCCTATGGGACGCTCCAGTCGAGAATATTTGACAATGGAGGAAACTCTGATCAAGCG  
ACGCCGCGTGGAGGATGAAGTCCTTAGGGACGTGAACTCCTTTTGTAGACTAATAAGTTT  
TGAATGGCCTAAGAATAAGAGGTTGCTAAACTCGTGCCAGCAGCAGCGGTAATACGAGTG  
CCTCAAGCGTTATCCGGAATTATTGGGCGTAAAGGGTATGTAGGTGGTTTTGTAGTCTT  
CTGTTAAAACTCTGGGCTTAACCCAGAACATGCAGGAGAAACGGCAAGACTTTAGAGTAT  
GCGAGGGGTCTGTGGAACCTCTAGGTGTAGCAGTGAAATGCGTTGATATCTAGGGGAACAC  
CAAAAGCGAAAGCAGCAGACTGGAGCATTACTGACACTGAAATACGAAAGCGTGGGTAGC  
GAATGGGATTAGAGACCCCCGTAGTCC

>Otu3479

CCAGCCTATGGGGCGCTGCAGTGAGGAATATTCGTCAATGGGGGAAACCCTGAACGAGCA  
ACGCCGCGTGCAGGAAGAAGGTTTTTCGGATCGTAAACTGCTTTTCTCTGGGACGAGAACG  
AACGGTACCAGAGGAAGAAGCCCCGGCTAACTACGTGCCAGCAGCCGCGGTAATACGTAG  
GGGGCAAGCGTTGTCCGGATTATTGGGCGTAAAGCGCACGCAGGCGGTCAACCAAGTTC  
GGAGTGACAGTTCCGGCTTAACCTGGGAAAGGTCTTCGAAAACCTGGTGGACTTGAGAACT  
TGAGGGGGGAGACGGAATTCCGGGTGGAGCGGTGAAATGCGTAGAGATCCGGAGGAACACC  
GAAAGCGAAGGCAGTCTCCTGGCAAGTTTCTGACGCTCAGGTGCGAAAGCTAGGGGAGCG  
AACAGGATTAGAAACCCGAGTAGTCC

>Otu3482

CCAGCCTATGGGTGGCAGCAGTAGGGAATATTGGGCAATGGAGGCAACTCTGACCCAGCC  
ATACCGCGTGCAGGACGAAGGCCCTCTGGGTGTAAACTGCTTTTATCAGGGAAGAAAACG  
CTTGATTTCATCTGAGCCTGACGGTACCTGAGGAATAAGCACCGGCTAACTCCGTGCCAG  
CAGCCGCGGTAATACGGAGGGTGCAAGCGTTATCCGGATTTACTGGGTTTAAAGGGTGCG  
TAGGCGGACTGTTAAGTCAGTGGTGAAAGATTCCGGCTCAACCCGAAAATTGCCATTGAT  
ACTGGCAGTCTTGAGTACAGTTGAGGTAGGCGGAATGTGTTCATGTAGCGGTGAGATGCAT  
AGATATGACACAGAACACCGATTGCGAAGGCAGCTTGCTGGGCCATTACTGACGCTGATG  
CACGAAAGCGTGGGGAGCAAACAGGATTAGAGACCCGTGTAGTCC

>Otu3485

CCAGCCTATGGGTGGCACCAGGCGCGAAACCTCCACAATGCGCGAAAGCGTGATGGGGGG  
AGTCTGAGTGGCGGACTTCGGTCCGCCTTTTGCCAAGTCTAAATAGCTTGGAATAAAGT  
GCTGGGTAAGACCGGTGGCAGCCGCCACGGTAATACCGGCGGCACGAGCGGTGTCCGCGA  
TTATTGGGCTTAAAGGGCCAGTAGCCGGCTAGAACAGTCCCACGTGAAATGTTGACGCTC  
AACGTTAACCCGGGCGTGGGATACCTTCTGGCTAGGGAGTGGGAGAGATCTGGGGTACTT  
ATGGGGTAGGGGTAAAATCCTGTAATCCTATAAGGACCACCGGTGGCGAAGGCGCCAGAT  
CAGAACACATCCGACGGTGAGTGGCGAAGGCTAGGGGAACGAATCGGATTAGAAACCCGA  
GTAGTCC

>Otu3486

CCAGCCTATGGGTGGCAGCAGTCGAGAATCTTCCGCAATGGGCGAAAGCCTGACGGAGCG  
ACGTTACGTGAATGAAGAAGCCCTTCGGGGTGTAAGTTCTTTTCTCATTTGAAGAACGCA  
AGTGAAGTGAATGAGGAATAAGGGGATCCTAATCCTGTGCCAGCAGGAGCGGTAAGACG  
GAATCCCCAAGCGTTACCCGGATTTATTGGGCGTAAAGGGTTCGTAGGTGGCGTAGTAAG  
TTGAAAGTTAAATCTCATCGGCTCAACCTTTGAGGTGCTTTCAATACTGCTACGCTTGAG  
GGCGTTAGGGGTAAACGGAACCGACGGAGTAGGGGTGAAATCCGTTGATATCGTCGGGAA  
CACCAAAAGCGAAGGCAGTTAACTAGGACGACCCTGACACTGAGGAACGAAAGCGTGGGG  
AGCAAAAAGGATTAGAGACCCCCGTAGTCC

>Otu3489

CCAGCCTACGGGATGCACCAGCATATCCACCGGTTGTAATCAGCCCTCCTATAACATTAC  
CAATAAAATTACCACTTGTATCAATAATCGCTTTATTAGTAGTCCACCCAATAGGTTGCC  
CAACTGTCTGTCCCGTTGCCGACGAAAAATATAGCTGTCCAGCATACATAGCAAGTTTAG  
CTGGGTTTGGGTCTGATGCTGTCCAGGTTCCATTCCAATATGCTCCTTGTGTCCATTCTG

CGTCATTTGTCCCCGTTGAGACAAAGCTGGCACCCGAACCTATGGCAACCGCTCCTGCTC  
CCAATGTCCCGTTTACATCCAATTTATAAGCAGGACTCGTTGTTCCAATACCGACTTCTC  
CGGTCTTCAGTATTGTCATCCTCTCAGTGTTATTTCATTAGATACCCTGGTAGTCC

>Otu3496

CCAGCCTACGGGTGGCACCAAGTGGGGAATCTTGCACAATGGGGGCAACCCTGATGCAGCG  
ACGCCGCGTGAACGATGAAGCCCTTCGGGGTGTAAAGTTCTATCGGCAGGGACGATAATG  
ACGGTACCGGAAGAATAAGCACCGGCTAACTACGTGCCAGCAGCCGCGGTAATACGTAGG  
GTGCAAGCGTTAATCGGAATTACTGGGCGTAAAGCGTGCGCAGGCGGTTTCGCAAGTCAG  
ATGTGAAATCCCCGGGCTTAACCTGGGAACTGCATTTGAAACTACGAGGCTAGAGTGTGT  
CAGAGGGGGGTAGAATTCCACGTGTAGCAGTGAAATGCGTAGAGATGTGGAGGAATACCG  
ATGGCGAAGGCAGCCCCCTGGGATAACACTGACGCTCATGCACGAAAGCGTGGGGAGCAA  
ACAGGATTAGAAACCCCCGTAGTCC

>Otu3498

CCAGCCTACGGGTGGCAGCAGTCGAGGATCTTCGGCAATGGGCGCAAGCCTGACCGAGCG  
ACGCCGCGTGCGGGATGAAGGCCTTCGGGTGTAAACCGCTGTCAGTGGGGAGAAAATGT  
ACGGAGGTTCTCCTCCGTATTTGATCTATCCGCAGAGGAAGTGTGGGCTAAGTTTCGTGCC  
AGCAGCCGCGGTAAGACGAACCACACAAACGTTATTTCGGAATTACTGGGCTTAAGGGTG  
CGTAGGCTGCGCGGAAAGTTGGGTGTGAAATCCCTCGGCTCAACCGAGGAACTGCGCCCA  
AACTACCGTGCTCGAGGGAGACAGAGGTGAGCGGAACCTAGGGTGGAGCGGTGAAATGC  
GTTGATATCCTAAGGAACACCCGTGGCGAAAGCGGCTCACTGGGTCTCTTCTGACGCTGA  
GGCACGAAAGCTAGGGTAGCGAACGGGATTAGAAACCCGAGTAGTCC

>Otu3507

CCAGCCTACGGGGGGCAGCAGTGGGGAATTTTGGACAATGGGGGCAACCCTGATCCAGCA  
ATGCCGCGTGAGTGAAGAAGGCCTTCGGGTGTAAAGCTCTTTTGTCCGGGAAGAAACGG  
TTCGCCTTAATAAGGTGAGCTAATGACGGTACCGGAAGAATAAGCACCGGCTAACTACGT  
GCCAGCAGCCGCGGTAATACGTAGGGTGCAAGCGTTATCCGGATTCACTGGGTTTTAAAGG  
GTGCGTAGGTGGGCAGGTAAGTCAGTGGTGAAATCTCCGGGCTTAACCCGGAAACTGCCG  
TTGATACTATCTGTCTTGAATGTAGTGGAGGTGAGCGGAATATGTCATGTAGCGGTGAAA  
TGCTTAGATATGACATAGAACACCTATTGCGAAGGCAGCTCGCTACACTATTATTGACAC  
TGAGGCACGAAAGCGTGGGGATCAAACAGGATTAGAGACCCTGGTAGTCC

>Otu3508

CCAGCCTATGGGGCGCTGCAGTAGGGAATCTTGCGCAATGGGCGAAAGCCTGACGCAGCA  
ACGCCGCGTGGGGGATGAAGGCCTTCGGGTGTAAACTCCTTTTAGTGGAACGAAATTG  
ACGGTACCCACAGAAAAAGCCCCGGCTAACTACGTGCCAGCAGCCGCGGTGATACGTAGG  
GGGCAAGCGTTGTCCGGATTTACTGGGCGTAAAGAGCTCGTAGGCGGCTTGGTAGTCGG  
CGTGTCAAATCTCCAGGCTTAACCTGGAGTCGCACTCGATACTGCCATAGCTAGAATCCG  
GTAGGGGACCATGGAATTCCTGGTGTAGCGGTGAAATGCGCAGATATCAGGAGGAACACC  
AGTAGCGAAGGCGGTGGTCTGGGCCGGTATTGACGCTGAGGAGCGAAAGCGTGGGGAGCG  
AACAGGATTAGAGACCCGGGTAGTCC

>Otu3515

CCAGCCTATGGGTCGCTGCAGTTAGGGAATTTTGACAATGGGCGCAAGCCTGATCGAGTG  
ACGCCGCGTGCGGGACGAAGCCTCTCGGGGTGTAAACCGCTTTTCTGTGGGACGAGCAAG  
GACGGTACCGCAGGAATAAGCCTCGGCTAACTACGTGCCAGCAGCCGCGGTAATACGTAG  
GAGGCGAGCGTTGTCCGGAATTACTGGGTGTAAAGAGCGCGTAGGCGGCTCGTTGCGTCG  
GGCGTGAAAGCTCCCGGCTTACCTGGGAGAGGGCGACCGAAACGGGCGAGCTTAGAGGGC  
GGTAGGGGCTGGCGAACGCCCGAGTAGCGGTGAAATGCGTTGAGATCGGGCAGAACAC  
CAGTGGCGTAGGCGGCCAGCTGGGCCGACCCTGACGCTGAGGCGCGAAAGCCAGGGGAGC  
GAACGGAATTAGAAACCCGAGTAGTCC

>Otu3521

CCAGCCTATGGGGGGCAGCAGTGGGGAATCTTGGACAATGGGGGCAACCCTGATCCAGCG  
ATGCCGCGTGAGTGAAGAAGGCCTTCGGGTGCTAAAGCTCTTTAGGTTGGGAAGAAGTGT  
ATATGGGGATAATCCATATACATTGACGGTGCCGACAGAATAAGCACCGGCAAACCTCTGT  
GCCAGCAGCCGCGGTAATACAGAGGGTGCAAGCGTTAATCGGAGTTACTGGGCGTAAAGG  
GCGCGTAGGCGGTTGTATGAGTGTGATGTGAAAGCCCCGGGCTTAACCTGGGAAGTGCAT  
CGCAAACGATACAACTGGAGTATATGAGAGGGTGGCGGAATTTCCGGTGTAGCGGTGAAA  
TGCGTAGAGATCGGAAGGAACGTCAATGGCGAAGGCAGCCACCTGGCATAATACTGACGC  
TGAGGCGCGAAAGCGTGGGGAGCGAACAGGATTAGATACCCGTGTAGTCC

>Otu3522

CCAGCCTATGGGTGGCTGCAGTGGAGAATATTAGTCAATAAACGAAAGTTCGAACTAGCA  
CTTTACGGAAATGAACGATTTAAAAAAATCATGAAGGCTATGACAGCTGTAAAGTTTAA  
CCGTAGATTAAACATGATGCTTTTATATCTAAAAAGAACCCCGGGCTAACAACGTGCCAGC  
AGCTGCGGTAAAGACGTTGACGGGGGAGCGTTACTGGTCTTACTGGGTGTAGAGAGAAGC  
TAGACTGTTTAAAGGACTTGCATTTAAAAACAAAAGGATGAGCGAATCCCTAATGCAAAAGC  
TTAATACTAGAGTTTTTAAAGAAATTTCGCGATAAGTACAATCTAGAGATGAAATTCTAAGA  
GATTGTAAGGATCTTCGAAAGCCACGGCAGCGAATTATTTAATCCTGACGTCGAATTTCT  
AAAGTGCGGTTCTCAATTAGGATTAGAGACCCCGTAGTCC

>Otu3526

CCAGCCTACGGGTGCGCAGCAGTGGGGAATTTTGCGCAATGGGGGAAACCCTGACGCAGCA  
ACGCCGCGTGAGGATGAAATCCCTTGGGATGTAAACTCCTTTTCGATAGGGAAGATAATG  
ACGGTACCTATAGAAGAAGCCCCGGCTAACTTCGTGCCAGCAGCCGCGGTAATACGTGGG  
GGCAAGCGTTGTTCGGAATTATTGGGCGTAAAGGGTGTGTAGGCGGTGCTCTAAGTTCGG  
TGTGAAATCTCCTGGCTTAACTGGGAGGGTGCGCCGGAACCTGGAGTGCTCGAGCGTGGG  
AGAGGAAAGCGGAATTCCTGGTGTAGCGGTGAAATGCGTAGATATCAGGAGGAACACCTG  
CGGTGTAGACGGCTTTCTGGACCATTGCTGACGCTGAGACACGAAAGCGTGGGTAGCAAA  
CAGGATTAGATACCCCTGTAGTCC

>Otu3530

CCAGCCTATGGGTGGCTCCAGTCGAGAATAATTCGCAATGGGCGAAAGCCTGACGATGCG  
ACGCCGTGTGAACGAAGAAGGCCCTTCGGGTGTAAAGTTCTGTCTGTTGGAACAAGTGT  
AACGTGTAAATAATGCGTTACATTGATGGTACAAGAAAAGGAAGCACCGGCTAACTCCGT  
GCCAGCAGCTGCGGTAATACGGAGGGTGCAAGCGTTAGTCGGAATTACTGGGCGTAAAGG  
GTGCGTAGGCGGGTGAGTAAGTCAGTGGTGAAATTCGGGAGCTTAACTTCGGAGCTGCCA  
CTGAAACTGCACACCTAGAGGAATAGCGGGGAAAACGGAATTCATGTGTAGCGGTGAAA  
TGCGTAGATATATGGAAGAACACCTGTGGCGTAGGCGGTTTTCTAGCTACATCCTGACGC  
TGAGGCACGAAAGCAAGGGGAGCAAACAGGATTAGAGACCCCTGTGTCC

>Otu3538

CCAGCCTATGGGGCGCTGCAGTAGGGAATTTTCCGCAATGGACGAGAGTCTGATGGAGCA  
ACGCCGCGTGACAGGATGAATGTCTTCGGATTGTAAACTGCTTTTCTCTGTGACGATTATG  
ACGGTAGCAGAGGAATAAGGACCTGCTAACTACGTGCCAGCAGCCGCGGTCATACGTAGG  
GTCCAAGCGTTATCCGGAATTACTGGGCGTAAAGAGTTGCGTAGGTGGCATAGTAAGCGA  
ATAGTAAAATGACGGGGCTCAACCTCGTGTCTATTATTTGAACTGCTAAGCTAGAGGACG  
AGAGAGGTTATTGGAATTCCTAAAGTAGGGGTAATATCCGTAGATATTAGGAGGAACACC  
GATGGCGTAGGCAGATAACTGGCTCGTTTTCTGACACTAAGGCACGAAAGCGTGGGTAGCA  
AACAGGATTAGATACCCTAGTAGTCC

>Otu3546

CCAGCCTATGGGGGGCTGCAGTCGAGAATCTTTCGCAATGGGCGCAAGCCTGACGAAGCG  
ACGCCGTGTGAGCGAAGAAGGCCCTCCGGGTGTAAAGCTCTTTCGCTAGGGAACAAGAGA  
GACGGGATGATACTCCGTTGATTTGATGGTACTTGGTAAAGAAGCACCGGCTAACTCCGT  
GCCAGCAGCTGCGGTAATACGGAGGGTGCAAGCATTGATCGGAATTACTGGGCGTAAAGG  
GCGCGTAGGCGGTCAGGAAAGTCAGATGTGAAATTCCGGGGCTCAACCCCGGAGCTGCAT  
TTGAAACTTCCTATCTAGAGTTCAGTTAGGGAACCGGAATTCACGTGTAGCGGTGAAA  
TGCGTAGATATGTGGAAGAACATCGGTGGTGAAGACGGTTTTTCTGGGCTGATACTGACGC  
TGAGGCGCGAAAGCAAGGGGAGCAAACAGGATTAGATACCCGAGTAGTCC

>Otu3548

CCAGCCTATGGGGGGCAGCAGTCGAGAATCTTCCACAATGGACGAAAGTCTGATGGAGCG  
ACGCCGCGTGATTGATGAAGTCCTTCGGGACGTAAAGATCTTTTATGCGTGAGAAAGTAA  
TTGATGTTAGCGCATGAATAAGGGGCTCCTAACTCTGTGCCAGCAGGAGCGGTAATACAG  
AGGCCCCGAGCATTATCCGGAATCACTGGGCGTAAAGGGTGTGTAGGCGGCAGCGTTAGT  
CGACTGTGAAAGATCCAGGGCTTAACCCAGGAGACGCAATCGAAACGGCGCAGCTACGAG  
GGCGCGAGAGGTACAGGGAACACCGGTGTAGGGGTGAAATCCGTTGATATCATGGGGAA  
CACCAAATGCGAAGGCACTATACTGGCGCACTCCTGACGCTGAAACACGAAAGCGTGGGA  
ATCGAAAAGGATTAGAGACCCGTGTAGTCC

>Otu3551

CCAGCCTATGGGATGCTGCAGTGAGGAATCTTGCGCAATGGGCGAAAGCCTGACGCAGCG  
ACGCCGCGTGAGGATGACGGTCTTCGGATTGTAAACCCCTGTAAAGCGGGGAGAAAGGT  
CTACTTCTAATACAAGTAGAATATGACGGTACCGCTAGAGAAAGCACCGGCTAACTTCGT  
GCCAGCAGCCGCGGTAATACGAGGGGTGCAAGCGTTATTCGGATTAAATTGGGCGTAAAGG

GTGTGCAGACGGTTTATTAAGTCATTTGTTAAATTCTTCGGCCTAACTGAAGGTATGCAA  
GTGATACTGATGAAGTAGAGGGTGGAAAGGGAGAAGTGGAAATTCCTCGGAGTAGCGGTAAAA  
TGCGTAGATCTCGAGAGGAACACCAATGGCGAAGGCAGCTTCTTGGTCCATTTCTGACGT  
TCAAACACGAAAGCGTGGGGAGCAAACAGGATTAGAGACCCGAGTAGTCC

>Otu3555

CCAGCCTATGGGTGGCTGCAGTGGGGAATCCTGGACAATGGAGGCAACTCTGATCCGGCT  
ATACCGTGTGTGTGAAGAAGGCCTTAGGGTTGTAAAGCACTTTTAGTAGGGAAGAAGATT  
TTGGTGTTAATAGCATCAAGATTTGACGGTACCTAAAGAAAAAGCACCGGCAAACTCTGT  
GCCAGCAGCCGCGGTAATACAGAGGGTGCAAGCATTAAATCGGAATTATTGGGCGTAAAGG  
GCATGTAGGTTGTTCCGTAAGTTAGATGTGAAAGAATCGGGCTCAACCTGATAAAGCATC  
TAATACTGCCAACTAGAGTGCGGTAGGGGATGATGGAATTTTCTGTGTAGCGGTAAAT  
GCTTAGAGATTGAAAGGAACATCGGAGGCGAAGGCGATCGTCTGGGCCGCAACTGACACT  
GAAATGCGAAAGCGTGGGTAGCAAACAGGATTAGAAACCCCAGTAGTCC

>Otu3556

CCAGCCTACGGGGGGCTGCAGTGGGGAATATTGGACAATGGGGGAAACCCTGATCCAGCG  
ACGCCGCGTGTGTGAAGAAGGCCTGCGGGTTGTAAAGCCCTTTTCGACGGGGACGATGATG  
ACGGTACCCGTAGAAGAAGCCCCGGCTAACTTCGTGCCAGCAGCCGCGGTAATACGAAGG  
GGGCTAGCGTTGCTCGGAATGACTGGGCGTAAAGGGCGCGTAGGCGGCGATGATAGTCAG  
GCGTGAAATTCCTGGGCTCAACCTGGGGACTGCGCTTGATACGTTATTGCTTGAGTACGG  
AAGAGGGTCGTGGAATTCACAGTGTAGAGGTGAAATTCGTAGATATCGGGAAGAACACCG  
GTGGCGAAGGCGGCGACCTGGTCCGGAACCTGACGCTGAGGCGCGAAAGCGTGGGGAGCAA  
ACAGGATTAGAAACCCCAGTAGTCC

>Otu3558

CCAGCCTATGGGGGGCTGCAGTCGAGAATCTTGCAACAATGGGCGAAAGCCTGATGCAGCG  
ACGCCGCGTGGGGGATGAAGCATTTCCGGTGTGTAAACCCCTTTTCGACTGGGAAGAATGCC  
TCGCAAGAGGACTGACGGTACCAGTATAAGAAGCCCCGGCTAACTACGTGCCAGCAGCCG  
CGGTAAGACGTAGGGGGCCAGCGCTGTTCCGGAATTACTGGGTGTAAAGGGTTTCGTAGGCG  
GTGTGGCAAGTTGGGAGTGAAATCTCTGGGCTCAACCCAGAGGCTGCTTCCAAAACCTGCT  
GTGCTTGAGTGTGAGAGAGGCTCGTGGAATTGCAGGTGTAGCGGTGAAATGCGTAGATAT  
CCGCAGGAACATCCGAGGCGAAAGCGGCTCGCTGGATCGCAACTGACGCTGAGGGACGAA  
AGCTAGGGGAGCAAACAGGATTAGAAACCCGCGTAGTCC

>Otu3559

CCAGCCTATGGGTGGCTCCAGTGGGGAATCTTGCGCAATGGAGGAAACTCTGACGCAGCG  
ACGCCGCGTGGGTGAAGAAGGCCTTCGGGTGTGTAAAGCCCTGTTCGAGTGGGAAAAACGAT  
TCCATAAATAATACGTATGGGAAGTGATTGTACCACTAGAGGAAGCACCGGCTAACTCCG  
TGCCAGCAGCCGCGGTAATACGGAGGGTGCAAGCGTTGTTCCGGAATTATTGGGCGTAAAG  
GGCAGGTAGGTGGTCTTAAAGTCTACTGTGAAATCCCTGAGCTTAACTCAGGAAGTGCG  
GTGGAACCTGTAAGACTAGAGTGCTGGAGGGGTGCGTGGAATTGCCGGTGTAGCGGTGAA  
ATGCGTAGATATCGGCAGGAACACCAGAGGCGAAAGCGGCGCACTGGACAGCAACTGACA  
CTCAACTGCGAAAGCGTGGGGAGCAAACAGGATTAGAGACCCCGGTAGTCC

>Otu3560

CCAGCCTATGGGTGCGCAGCAGTCGAGAATCATTCGCAATGGGCGAAAGCCTGACGATGCG  
ACGCCGCGTGTGAGCGAAGAAGGCCTTAGGGTTGTAAAGCTCTTTTCGCCCCGGAACAAGAGA  
AGTCGGCTAATATCCGGCGGATTTGAGCGTACCGGGTAAAGAAGCACCGGCTAACTCCGT  
GCCAGCAGCTGCGGTAATACGGAGGGTGCAAGCATTAAATCGGATTAATTGGGCGTAAAGG  
GCGCGTAGGCGGGGATGTAAGTCAGATGTGAAATCCCGAGGCTCAACCTCGGAACAGCAT  
TTGAAACTACATCTCTTGAGGGTAGGCGGAGAAAACGGAATTCCACAAGTAGCGGTGAAA  
TGCGTAGATATGTGGGAGAACACCGGTGGCGAAGGCGGTTTTCTAGCTTATTCCTGACGC  
TGAAACGCGAAAGCAAGGGGATCAAACAGGATTAGATAACCCGCGTAGTCC

>Otu3561

CCAGCCTATGGGTGGCTCCAGCCGAGAATATTCGACAATGGGCGAAAGCCTGATCGAGCG  
ACGCCGCGTGCAGGATGAAGTGCTTCGGTATGTAAACTGCTTTTGCGGACTAAGAGGTTT  
ATTGACTAGTCCGAGAATAAGGGGTGCTAAACTCGTGCCAGCAGCAGCGGTAATACGAG  
TGCCCCAAGCGTTATCCGGAATCATTGGGCGTAAAGGGTGTGTAGGCGGTGCGGTTAGTC  
TTCTGTAAATTCCTTCGGCTTAACCGGGGGCATGCAGGGGAAACGGCGCGACTTGAGGAT  
GCGAGAGGTGAATGGAACCTCATGGAGTAGGGGTGAAATCCGTTGATATCATGGGGAACAC  
CGAAAGCGAAGGCAATTCAGTGGCGCACTCCTGACGCTGAAACACGAAAGCGTAGGTAGC  
GAATGGGATTAGAAACCCGTGTAGTCC

>Otu3562

CCAGCCTATGGGTCGCAGCAGTGGGGAATTTTGGACAATGGGCGCAAGCCTGATCCAGCA  
ATGCCGCGTGTGGGATGAAGGCCTTCGGGTGTAAACCACTGTCAGAGAGGATGAAATAC  
TGGTGGGTACTCCCATCAGCTTGACATATTCTTAGAGGAAGGACGGGCTAAGTTCGTGCC  
AGCAGCCGCGGTAAGACGAACCGTCCAAACGTTATTTCGGAATCACTGGGCTTAAAGGGTG  
CGTAGGCGGCGCGGAAAGTAGGGTGTGAAATCCCTCGGCTCAACCGAGGAACTGCGCTCT  
AAACTACCGTGCTCGAGGGAGATAGAGGTGAGCGGAACTTGGGGTGGAGCGGTGAAATGC  
GTTGATATCCTAAGGAACACCGGTGGCGAAAGCGGCTCACTGGATCTCTTCTGACGCTGA  
GGCACGAAAGCTAGGGTAGCGAACGGGATTAGAAACCCGCGTAGTCC

>Otu3564

CCAGCCTATGGGAGGCAGCAGGCGCGCAAACTCCACACTGCGCGGAAGCGTGATGGGGGG  
AATCTGAGCGGTTCACTTCGGTGAACCTTTTGCCAAGTGTAGCAAGCTTGGCGAATAAGT  
GCCGGGCAAGACCGGTGGCAGCCGCCACGGTAATACCGGCGGCACAAGTGGTGTCCACGA  
TTATTGGGCTTAAAGCGCTCGTAGCTGGCCAGAACCGTCTGATGTGAAATATTGGTGCTC  
AACACCAATGCGTGCATCAGATACCTTCTGGCTAGGGAGTGGGTGAGGTTAGGAGTACTT  
ACGGGGAAGGGGTAAAATCCTATAATCCTGTAAGGACTAACGGTGGCGAAGGCGCCTAAC  
TAGAACACATCCGACAGTGAGGAGCGAAGGCTAGGAGAACGAATCGGATTAGATACCCTG  
GTAGTCC

>Otu3568

CCAGCCTATGGGTGGCTCCAGTGGGGAATATTGGACAATGGGCGCAAGCCTGATCCAGCA  
ACGCCGCGTGAGGGATGAAGCATTTTCGGTGTGTAAACCTCTGTAAGTGGGGACGAAGGGG  
CAACCCTGACGGTACCCGCAAAGTAAGCCCCGGCTAACTCCGTGCCAGCAGCCGCGGTAA  
TACGGAGGGGGCTAGCGTTATTTCGGAATTACTGGGCGTAAAGAGCGCGTAGGCGGACTCC  
TAAGTCTGTTGTCTAATCCCCGGCTTAACCGGGGAAAGGCAAGAGATACTGGGAGACTA  
GAGTGTGCGAGGGGGAACTAGAAATTCCTGGTGTAGCGGTGAAATGCGTAGAGATCAGGAG  
GAATACCGGTGGCGTAAGCGAGTTCTTAGACGACAACCTGACGCTGAGGCGCGAAAGCCAG  
GGGAGCAAACGGGATTAGAAACCCAGTAGTCC

>Otu3571

CCAGCCTATGGGAGGCAGCAGTCGAGAATTTTTCACAATGGGCGAAAAGCCTGATGGAGCG  
ACGCCGCGTGAGAGGATGAAGGTCTTCGGATTGTAAACTCCTGTCACTACAGAACAAAACCT  
ACCAGGTAAATAATCTGGTGGCTTGATAGTATGTGGAGAGGAAGGGACGGCTAACTCTGT  
GCCAGCAGCCGCGGTGATACAGAGGTCCCGAGCGTTGTTTCGGATTTACTGGGCGTAAAGG  
GTGCGTAGGAGGTTAAGAAAGTAAGGCGTGAAATCCCACCGCTCAACGGTGGAACTGCTT  
CTTATACTACTTAGCTAGAGGACTGGAGGGGAGATCGGAATTCCTGGTGTAGCGGTGAAA  
TGCGTAGATATCAGGAGGAACGCCAATAGCGAAGGCAGATCTCTGGAAAGTTCCTGACTC  
TGAGGCACGAAGGCTAGGGTAGCAAACGGGATTAGATACCCAGTAGTCC

>Otu3573

CCAGCCTATGGGGTGCTGCAGTGAGGAATATTGCGCAATGGGGGCAACCCTGACGCAGCA  
ACGCCGCGTGAGTGAGGAAGGTTTTTCGGACCGTAAAGCTCTGTGAGTGAGGAAGAAATGT  
ATCATGGCTAATATCCATGGTATTTGACGGTACCGCTAAAGGAAGCACCGGCTAACTCCG  
TGCCAGCAGCCGCGGTAATACGGGGGGTGCAAGCGTTGTTTCGGAATTATTGGGCGTAAAG  
AGCGTGTAGGCGGCTGAATAAGTCAGATGTGAAATCCCTGGGCTTAACCCAGGAAGTGCA  
TTTGAAACTATTTCAGCTTGAGTAGGGGAGAGGAAAGTGGAATTCCTGGTGTAGAGGTGAA  
ATTCTGATAGATATCAGGAGGAACACCGGTGGCGAAGGCGACTTTCTGGCCCTATACTGACG  
CTGAGACGCGAGAGCGTGGGTAGCAAACAGGATTAGATACCCGAGTAGTCC

>Otu3574

CCAGCCTATGGGGGCTCCAGGGAATATTGGACAATGGAGGAACTCTGATGCAGCGACGC  
CGCGTGAGCGATGAAGCCCCCTCGGGGTGTAAAGCTCTTTCGGCAGGAACGATAATGACGG  
TACCTGAAGAAGAAGCTGCGGCTAACTACGTGCCAGCAGCCGCGGTAATACGTAGGCAGC  
GAGCGTTGTTTCGGAATACTGGGCGTAAAGAGTGTGTAGGCGGTGCTCTAAGTTTGGTGT  
GAAATCTCCCGGCTTAACCGGGAGGGTGCGCCGAAAACCTGGGTGACTAGAGTATGGGATG  
GGTAAGTGGAATTCCTGGTGTAGCGGTGAAATGCGTAGATATCAGGAGGAACACCGGTGG  
TGTAAGACGGCTTACTGGACCATAACTGACGCTGAGACACGAAAGCGTGGGTAGCAAACAG  
GATTAGAAACCCGTGTAGTCC

>Otu3575

CCAGCCTACGGGGTGCAACCAGGCGAGAATATTCCACAATGGACGAAAAGTCTGATGGAGCG  
ACGCCGCGTGCTGGATGAAGTGCTTCGGTACGTAAACAGCTTTTATCGGGGACGAAATTA  
TTGACGGTACCCGATGAATAAGGACCTCCTAACTCTGTGCCAGCAGGAGCGGTAATACAG

AGGGTCCAAGCGTTACCCGGAATCACTGGGCGCAAAGGGCGTCAAGGCGGCCATGTTAGT  
CGTTTGTAAAATCCGTGGGCTCAACCTACGGCGCGCAAGCGAAATGGCATGGCTCGAGGG  
CGCGAGAGGTAGAGGGAACCTCACGGTGGAGGGGTGAAATCCGTTGATATCGTGGGGAACA  
CCAAAGGCGAAGGCACTCTACTAGCGCGCTCCTGACGCTCACACACGAAAGCCAGGGGAG  
CGAACGGGATTAGAAACCCCTGTAGTCC

>Otu3594

CCAGCCTACGGGGGGCACCAGTGAGGAATTTTGCGCAATGGGCGAAAGCCTGACGCAGCG  
ACGCCGCGTGCGGGACGAAGGTCTTCGGATCGTAAACCGCTGTCAGTGGGGAAGAGCAAG  
GACGGTACCCGCTGAGGAAGCTTCGGCTAACTACGTGCCAGCAGCCGCGGTAATACGTAG  
GAAGCGAGCGTTGTCCGGATTTACTGGGCGTAAAGGGCGTGTAGGCGGAGCGGCGCATCC  
CGGAGTAAATCCAACGGCTCAACCGTTGGTTCATCTGGGAGATGGCCGCCCTTGAGGACA  
GGAGAGGAAAGTGGAATTTCCGGTGTAGCGGTGAAATGCGTAGATATCGGGAGGAACACC  
AGTGGCGAAGGCGACTTTCTGGCCTGTTCTGACGCTGAGGCGCGAAAGCCAGGGGAGCG  
AACGGGATTAGAAACCCCTTGTTAGTCC

>Otu3603

CCAGCCTACGGGACGCTCCAGTTAAGGAACTTTCCCAATGCTCGAAAGAGTGAGAAAATC  
AACCAGAGTGTTTTCTTTTAGAAAACTTTGTCTGCTGTAAAAAAGCAGATGAATAAGGA  
CTGGGCAAGACCGGTGCCAGCCGCCGCGGTAATCCCGGCGGTCCGAGTCGCATCCACATT  
TATTGGGTCTAAACATCCGTAGCTTGTTATGTAAGTCTCTTGTGAAATCTCATTCTCA  
AACTTGAGGCGTGCAAGAGATACTACATTGCTAGAGATCGGAAGACGTAAAGAGTACGAC  
GGAGGTAGTGGTTAAACATGTTAATCTTCGTCGGACTAACAATGGCGAAGGCACTTTACG  
AGTACGAATCTGACAGTGAGGGATGAAGGCTAGGGGCGCAAAGGGATTAGATACCCTAG  
TAGTCC

>Otu3607

CCAGCCTATGGGTGGCTGCAGTGAGGAATATTGCGCAATGGGGGCAACCCTGACGCAGCA  
ACGCCGCGTGAGTGAGGAAGGTTTTTCGGATTGTAAAGCTCTGTGAGCGGAAAGAAATGC  
ATGGTGGCTAATATCCATCATGCTTGACGGTACCGCTAAAGGAAGCCCCGGCTAACTTCG  
TGCCAGCAGCCGCGGTAATACGAGGGGGGCGAGCGTTGTTTCGGAATTATTGGGCGTAAAG  
GGTGCGTAGGCGGTTTTGGTAAGTCTTTTGTGAAATCTATGGGCTCAACTCATAGACTGCA  
AGGGAAACTGCCGGGCTTGAGTGTGGGAGAGGTGAGTGGAATTTCCCGGTGTAGCGGTGAA  
ATGCGTAGATATCGGGAGGAACACCTGTGGCGAAAGCGGCTCACTGGACCACAACCTGACG  
CTGATGCACGAAAGCTAGGGGAGCAAACAGGATTAGATACCCAGTAGTCC

>Otu3611

CCAGCCTACGGGGGGCAGCAGTGGGGAATATTGGACAATGGGCGAAAGCCTGATCCAGCA  
ATGCCGCGTGAATGATGAAGGCCTTCGGGTCGTAAACCTCTTTCGATCGGGAAAAACGGC  
TCTGTGAATAGCAGGGTCTGATGGTACCGGAAGAAGAAGCCCCGGCCAACTACGTGCCAG  
CAGCCGCGGTAATACGTAGGGGGCGAGCGTTGTTTCGGAATTACTGGGCGTAAAGGGCGTG  
TAGGCGGTGCGGTAAGTTGGGCGTGAAATCCCCGGGCTTAACCCGGGGGGGCCGTTTCAGG  
ACTGCCGTGCTAGGGTGCAGGAGAGGGCAGTGGAATTTCCCGGTGTAGCGGTGAAATGCGT  
AGATATCGGGAGGAACACCTGCGGCGAAGGCGGCTGCCTGGACCCTAACCGACGCTGAGG  
CGCGAAAGCTAGGGGAGCAAACAGGATTAGATACCCGCGTAGTCC

>Otu3624

CCAGCCTATGGGGGGCTGCAGTTCGGAATATTTCGGCAATGGACGCAAGTCTGACCGAGCG  
ACGCCGCGTGCGGGATGAAGGCCCTTGGGTTGTAAACCGCTGTACAGGTGAGCAAGTCA  
CAGCCGCATAACACGCGGTTGTGTTGAGTTAAGCTTGAGAGGAAGCCCCCGCTAATCACG  
TGCCAGCAGCGCGGTAATACGTGAGGGGCGAACGTTGTTTCGGTGTCACTGGGCTTAAAG  
GGCGCGTAGGTGGCTGCGTAAGTAAGGTGTGAAAGCCCTCGGCTTACCCGGGGAATTGCG  
CCTTATACTGCGTGGCTTGAGGGTCATAGGGGAAGGAGGAACCTCCAGGTGTAGCGGTGAA  
ATGCGCAGATATCTGGGGGAAGGCCGCGGCGAAGGCGTCCTTCTGGGTGATTCTGTCA  
CTGAGGCGCGAAAGCGTGGGGAGCAAACAGGATTAGATACCCGCTGTAGTCC

>Otu3625

CCAGCCTATGGGAGGCTCCAGTCTAGAGGCTTCGGCAATGGGGGCAACCCTGACCGAGCG  
ACGCCGCGTGTTGGGATTGAAGGCCTTCGGGTCGTAAACCACTGTCAAGAGGGAAGAATAC  
CTGGATGGCGAATTCGGGGGAGACGGTACCTCTGGAGGAAGCCCCGGCTAACTCCGTGCC  
AGCAGCCGCGGTAATACGGAGGGGGCAAGCGTTGTTTCGGATTTACTGGGCGTAAAGGGTG  
TGTAGGCGGTTGCGCAAGTCTGGTGTGAAATCTTCACCGCTTAACGGGAAGAGGTCACTG  
GAAACTGCGTGACTCGAGTATGGTAGAGGCAAGCGGAATTCCTGGTGTAGCGGTGGAATG  
TGTAATATCAGGAAGAACATCTGTGGCGAAGGCGGCTTGTTGGGCCATCACTGACGCTG

AGACACGAAAGCGTGGGGAGCAAACGGGATTAGATACCCCCGTAGTCC

>Otu3626

CCAGCCTATGGGGGGCACCAGCAGGGAATCGTACGCAATGGACGAAAGTCTGACGTCGCA  
ATGCCGCGTGGGGGATGAAGGCCTTCGGGTCGTAAACCCCTTTTGCCATATATGAGAGTA  
TATGGAGAATAAGCAACTGCTAACTCTGTGCCAGCAGCCGCGGTAATACAGAGGTTGCAA  
GCGTTATCCGGATTTATTGGGCGTAAAGCGTTTCGTAGGCGGATTGGAAAGTTACTCTTC  
AAAGACCACGGCTTAACCGGGGGAAGGGGAGTAATACTACTAGTCTTGAAATATGGTGGG  
GTATCTGGAAGTATGGTGTAGTAGTGAAATACGTTGATATCATCAGGAAGTCCAAGGGC  
GAAGGCAGGATACTAACCATTTTTTGACGCTGAGGAACGACAGCTAGGGGAGCGAAAGGG  
ATTAGATACCCCCGTAGTCC

>Otu3629

CCAGCCTATGGGGCGCACCAGTGAGGAATTTTCCGCAATGGGCGAAAGCCTGATGGAGCG  
ACGCCGCGTGGGGGATGAATGGCTTCGGCCCGTAAACCCCTGTCATTTCGCGAACAATGTC  
CCGACAATAATACTGGCGGGATTGATAGTAGCGGAAGAGGAAGGGACGGCTAACTCTGTG  
CCAGCAGCCGCGGTAATACAGAGGTCCCAAGCGTTGTTTCGGATTCACTGGGCGTAAAGGG  
TGCGTAGGTGGTTCGGGTAAGTTCGATGTGAAATCTCGGAGCTCAACTCCGAAACGGCATT  
GGATACTATTTCGGCTTGAGGACTGGAGGGGGGACTGGAATTCTCGGTGTAGCAGTGAAAT  
GCGTAGATATCGAGAGGAACACCAGTGGCGAAGGCGAGTCCCTGGACAATCCCTGACACT  
AAGGCACGAAAGCTAGGGGAGCAAACAGGATTAGAGACCCCTCGTAGTCC

>Otu3631

CCAGCCTATGGGTGGCTCCAGTGGGGAATATTGGTCAATGGACGCAAGTCTGAACCAGCC  
ATGCCGCGTGCAGGATGACAGCCCTACGGGTTGTAACTGCTTTTGTACGGGAAAAAACC  
TTCGGTCGTGAACCGGAGCTGATAGTATGGTAAGAATAAGCATCGGCTAACTTCGTGCCA  
GCAGCCGCGGTAATACGAAGGATGCAAGCGTTATCCGGATTTATTGGGTTTAAAGGGTGC  
GTAGGCGGACTTATAAGTCAGTGGTGAATCTCATCGCTTAACGATGAACGTGCCATTGA  
TACTGTAGGTCTTGAGTACAGATGCCGTTGGCGGAATGTGTATGTAGCGGTGAAATGCA  
TAGATATGACACAGAACACCGATTGCGAAGGCAGCTGACGAAACTGTAAGTACGCTGAG  
GCACGAAAGCGTGGGGATCAAACAGGATTAGAAACCCAGTAGTCC

>Otu3633

CCAGCCTACGGGTTCGAGCAGGCGCGAAACCTTTGCAATGCGCGTAAGCGTGACAGGGGA  
ACTCTGAGTGGTAGAGGACACAGTCCTCTATCTTTTGACAACCCTAAATCGGTTGTAGAA  
TAAGGTCTGGGCAAGACTAGTGCCAGCCGCCATGGTAGATGCTAAATGCACCCTACCCAC  
GGTAAGCGGTAATACTAGCAGAACGAGTGGTATCCACGAATATTGGGTCTAAAGGGTCCG  
TAGCTGGCCTGTAAAGTTTCGCTGTGAAATCTTGAGCTCAACTTCAAGGCGTGACGAAA  
TACTGGCGGGCTTGAGAGTGGGGGAGGTCAGGGGTAAGAGTAAAATCTT  
GTAATCCTGTGAGGACTTCCAGTGGCGTAGGCGCTGACCAAACACGCTCTGACAGTGAG  
GGACGAAGGCTAGGAGAACGAATCGGATTAGATACCCAGTAGTCA

>Otu3634

CCAGCCTATGGGAGGCTCCAGTCGAGAATTTTTCACAATGGGGGAAACCCTGATGGAGCG  
ACGCCGCGTGGGGGATGAATGGCTTCGGCCCGTAAACCCCTGTCATTTGCGACCAAGATT  
GCCGTTGAATATTCCGGCGGTTTGATGGTAGCGGAAGAGGAAGGGACGGCTAACTCTGT  
GCCAGCAGCCGCGGTAATACAGAGGTCCCGAGCGTTGTTTCGGATTCACTGGGCGTAAAGG  
GTGCGTAGGTGGCCGGGTAAAGTCTGATGTGAAATCTCTGAGCTCAACTCAGAACTGCAC  
TGGATACTATCCGGCTCGAGGGTTGAAAGGGGGGACTGGAATTCTCGGTGTAGCAGTGAAA  
TGCGTAGATATCGAGAGGAACACCAGTGGCGAAGGCGAGTCCCTGGACAACCTCCTGACGC  
TGAGGCACGAAAGCCAGGGGATCAAACGGGATTAGAAACCCCTCGTAGTCC

>Otu3635

CCAGCCTATGGGTGGCACCAGTAAGGAATATTGGACAATGGACGCAAGTCTGATCCAGCC  
ATGCCGCGTGAAGGATTAAGGTCCTCTGGATTGTAACTTCTTTTATCTGGGACGAAAAA  
AGGGTTTTCTAACTCGACTGACGGTACCAGATGAATAAGCACCGGCTAACTCCGTGCCAG  
CAGCCGCGGTAATACGGAGGGTGCAAGCGTTATCCGGATTCACTGGGTTTAAAGGGTGGC  
TAGGCGGGTAGGTAAAGTCAGTGGTGAATCTCTAAGCTTAACTTGGAAGTGCATTGAT  
ACTATTTATCTTGAATATTGTGGAGGTAAGCGGAATATGTCATGTAGCGGTGAAATGCTT  
AGATATGACATAGAACACCTATTGCGAAGGCAGCTTGCTATACATATATTGACGCTGAGG  
CACGAAAACGTGGGGATCAAACAGGATTAGATACCCCGGTAGTCG

>Otu3637

CCAGCCTACGGGTGGCAGCAGTAACGAATATTCCGCAATGGGCGCAAGCCTGACGGAGCG  
ATGCCGCGTGCAGGACGAAGCCCTTCGGGGTGTAACTGCTGTCAGGGTTTAGCAACATA

ATGAGCAGACCCAAAGGAAGAGGGCGACTAACTCTGTGCCAGCAGTCGCGGTAATACAGAG  
GCCCTCGAGCGTTAATCGGAATCACTGGGCTTAAAGGGTGCGTAGGCGGTCTCGTAAGTGC  
CTTGTGAAATCCCATGGCTCAACCATGGAACGGCTCGGCAGACTGCGGGACTTGAGGTTG  
GTAGGGGCTACTGGAACCTAGGTGGAGCGGTGAAATGCGTAGATATCTAGAGGAACGCC  
AAAGGTGAAGACAGGTAGCTGGGCCAATTCTGACGCTGAGGCACGAAAGCGTGGGGAGCG  
AACGGGATTAGAGACCCTTG TAGTCC

>Otu3638

CCAGCCTACGGGGGGCTGCAGTGAGGAATCTTCGTCAATGGGGGAAACCCTGAACGAGCA  
ACGCCGCGTGACAGGAAGACGGTCTTCGGATTGTAACTGCTTTTCTCTGGGAAGAGGAAG  
GACGGTACCAGAGGAAGAAGCCTCGGCTAACTACGTGCCAGCAGCCGCGGTAATACGTAG  
GAGGCAAGCGTTGTCCGGATTTATTGGGCGTAAAGCGTCCGCAGGCGGTGAACCAAGTTT  
GGAGTGACAGTTGCCGGCTTAACCGGGAGAGTGCTTCGAAAACCTGGTTGACTTGAGGGCT  
TCAGAGGGACACGGAATTCCGGGTGTAGTGGTGAAATGCGTAGATATCCGGAGGAACATC  
AATGGCGTAGGCAGTGTCTGGGAAGTACCTGACGCTCAGGGACGAAAGCTAGGGGAGCG  
AACGGGATTAGATACCCCTGTAGTCC

>Otu3639

CCAGCCTACGGGGCGCACCCAGTGAGGAATATTGCGCAATGGCCGAAAGGCTGACGCAGCG  
ACGCCGCGTGAGGATGAAGTCCGTTAGGATGTAACTTCTTTTGCAGGGGATGAATGTG  
GTGCCTTCGGGTGCCATTGACCGTACCCTGCGAATAAGGATCGGCTAACTACGTGCCAGC  
AGCCGCGGTAATACGTAGGATCCGAGCGTTGTCCGGAATTACTGGGTGTAAAGGGCGTGT  
AGGTGGAACTTTAAGTCCGTGGTGAAAGCCTGCAGCTCAACTGCAGAACTGCCTTCGATA  
CTGAAGTTCTTGAGTACGGCAGAGGGAGATGGAATTCATGGTGTAGCGGTGAAATGCGTA  
GATATCAGGAGGAACACCTGTGGCGAAAGCGGCTCACTGGACCATTCTGACGCTCATAC  
GCGAAAGCTAGGGTAGCAAACGGGATTAGATACCCGAGTAGTCC

>Otu3642

CCAGCCTACGGGTGGCTCCAGTCAAGAATCTTGGTCAATGGGCGAAAGCCTGAACCAGCG  
ATGTCGCAGCGCGAATTGAAGGCTTATAGTCGTAAAGCGCCGAAGTATGGATCCAACAAG  
GAGATGTCCATATGGAGTAGCCCTGTGTAACTCTCGGTGCCAGCACACGCGGTCATACCGA  
AAGGGCGAGGCATTTCCTATTTCGAAATGGGTGTAAAGAGTCATTAGGCGGACTTATCAAA  
TCTACCTGAAAGATCGAGGCGAAACCTTAAGCGAGGGTGGAATCATTTAGAGTCTAGAGT  
ATAGCAGAGGGTTGTGGAATGCTTGGCGTACCGATGGAATGGATTGATGCTAAGTGGAAC  
TCCAATGGCGAAGGCAACAACCTGGGCTTTACTGACGCTGACTGACGAAAGTGTGGGGAG  
CAAAGTGGATTAGAGACCCTAGTAGTCC

>Otu3644

CCAGCCTACGGGGTGACCCAGTGGGGAATTTTTCGCAATGGGCGAAAGCCTGACGCAGCA  
ACGCCGCGTGAGGATGAAGGCCCGGGTCGTAACTCCTGTCAGTGGGGACGAATGCC  
TCGCAAGAGGTTTACTGTACCCATTGAGGAAGCCACGGCTAACTCCGTGCCAGCAGCCG  
CGGTAATACGGAGGTGGCAAGCGTTGTTTCGGAATTACTGGGCGTAAAGGGCGCGTAGGCG  
GTTTGGCAAGTCAGATGTGAAAGCCCCGGGCTTAACCCGGGAATTGCATCTGAACTGCT  
TAACTTGAGCTCTGGATGGGGTAGTGGAATTTCCAGTGTAGCGGTGAAATGCGTAGATAT  
TGGGAGGAACACCTGCGGCGAAGGCGGCTACCTGGACAGTGACTGACGCTGATGCACGAA  
AGCTAGGGGAGCAAACAGGATTAGAAACCCGCGTAGTCC

>Otu3653

CCAGCCTATGGGATGCTGCAGTCGAGAATTTTTCTCAATGGGCGAAAGCCTGAAGGAGCG  
ACGCCGCGTGGGGGATGAATGGCTTCGGCCCGTAAACCCCTGTCATTTCGGGATCAATGCG  
TCTGGGTGAACATCCCAGACGTTGATAGTAACGGAAGAGGAAGGGACGGCTAACTCTGTG  
CCAGCAGCCGCGGTAATACAGAGGTCCCAAGCGTTGTTTCGGATTCACTGGGCGTAAAGGG  
TGCGTAGGTGGCCGGGTAAAGTCTGATGTGAAATCTCGGAGCTCAACTCCGGAACGGCATT  
GGATACTATCCGGCTGGAGGGTCGGAAGGGGGACTGGAATTCTCGGTGTAGCAGTGAAAT  
GCGTAGATATCGAGAGGAACACCAGCGGCGAAGGCGAGTCCCTGGACGACTCCTGACACT  
GAGGCACGAAAGCTAGGGGAGCAAACAGGATTAGAGACCCTGGTAGTCC

>Otu3654

CCAGCCTACGGGAGGCTGCAGTAAGGGATATTGCGCAATGGGCGAAAGCCTGACGCAGCA  
ACGCCGCGTGAGGACGACGGCTTCGGGTGTAACTCCTTTTACGAGGACGAGGAAG  
GACGGTACTCGTGGAATAAGCTTCGGCTAACTACGTGCCAGCAGCCGCGGTAAGACGTAG  
GAAGCGAGCGTTATCCGGATTTACTGGGCTTAAAGGGTGTGTAGGCGGGTCTAGAGGCTG  
TGCATGAAAGCTGCCCCGCTCAACGGGCAGAGGCTGTGCAAGACTGGCGGTCTAGAGGCTG  
TGAGAGGGATGCGGAATTCCGGGTGTAGTGGTGAAATGCGTAGAGATCCGGAAGAACACC



AGAGGCGAAGGCGGCATCCTGGCACAGAACTGACGCTGAGACACGACAGCATGGGGAGCG  
AACGGGATTAGATACCCGCGTAGTCC

>Otu3659

CCAGCCTACGGGGGGGCAGCAGTGAAGAATCTTGGGCAATGGAGTAACCTCTGACCCAGTA  
AGAATTCATGCATGATGGATGCGTACAGTTTCTGTAAAGTGCTAGCGATAACGAGGAAG  
CTGTCCGTAGTTATCCCATAAAGCGCCGGCCAACCTTCGTGCCAGCAGCCGCGGTAAATACG  
AAGGGCGCGTGTGTTATTCGTTTTGATTGGGTGTAAAGGGTACGTAGGCTGCTGTTGAAA  
TTCTTGACTAAAAGCGTGTAGCATTCCATACGATTGTTTTTTAAAGACTCAGCTAGTGA  
TGGGGAGTGGTGGGGGTAACCTTCTGTGTAGGGGTAGAATCCGACCATATAAGAATGAAC  
ACCAGCTAGCGAAGGCGCCTCTCCGGCCTCATCAGACGCTAAGGTACGGAAGTTTAGGGA  
GCAAACAGGATTAGAAACCCGCGTAGTCC

>Otu3660

CCAGCCTACGGGGGGGCACCAGTCGAGGACCTTCGTCAATGGGCGAAAGCCTGAACGAGCG  
ACGCCGCGTGCCTGATGAAGGCCCTTCGGGTGTAAAACGCGAAAGTGGGGACGAAAGCCG  
AAAGTTTTGACCGATCCACAGTAAGCTCGGGCTAAGTTTCGTGCCAGCAGCCGCGGTAAAGA  
CGAACCGAGCGAACGTTATTCGGAATCACTGGGCTTAAAGGGCGCGTAGGCGGGCATCAA  
AGTCTGTGTTGAAATCCGGCAGCTCAACTGTCGAACCGGCATGGATACTGGGTGTCTCGA  
GGGAGGTAGGGGCGTGCAGAACTATTGGTGGAGCGGTGAAATGCGTTGATATCAATAGGA  
ACTCCGGTGGCGAAGGCGGCACGCTGGACCTCTCTGACGCTGAGGCGCGAAAGCCAGGG  
GAGCAAACGGGATTAGATACCCGCTGTAGTCC

>Otu3662

CCAGCCTACGGGACGCAGCAGTGGGGAATTTTTCGCAATGGGGGAAACCTGACGCAGCA  
ACGCCGCGTGGAGGATGAAGCCCCTTCGGGCGTAAACTCCTTTTCGACCAAGACGATAATG  
ACGGTACTGGTGGAAGAAGCACCGGCTAACTCTGTGCCAGCAGCCGCGGTAAATACAGAGG  
GTGCAAGCGTTGTTTCGGAATTATTGGGCGTAAAGGGCGCGTAGGCGGGCGGACAAGTCAC  
CTGTGAAATCCCCAGGCTTAACCTGGGGCCTGCAGGCGAAACTGTCTGTGCTGGAGTATGG  
GAGAGGTGCGTGGAATTCCTGGTGTAGCGGTGAAATGCGTAGATATCAGGAGGAACACCG  
GTGGTGTAAACGGCTTTCTGGACCATAACTGACGGTGAGGCACGAAAGCGTGGGTAGCAA  
ACAGGATTAGATACCCCCGTAGTCC

>Otu3664

CCAGCCTATGGGTTCGCAGCAGTAGGGAATTTTCCGCAATGGGCGAAAGCCTGACGGAGCG  
ACGCCGCGTGAGAGAAGACGGTCTTCGGATTGTAAATCTCTGTCTTTGGGGAAGAAAACA  
ATGACGGTACCCAAAGAGGAAGCCCCGGCTAACTACGTGCCAGCAGCCGCGGTAAATACGT  
AGGGGGCGAGCGTTATCCGGATTTATTGGGCGTAAAGGGCGTGTAGGCGGTAGATTAAAGT  
TGTTGTAAAAGGCAATGGCTCAACCATTGTAAGCGACCAAACTGGTTTACTTGAGTGC  
AGAAGAGGAGAGTAGAATTCCCGGTGTAGCGGTGGAATGCGTAGATATCGGGAGGAATAC  
CAGTGGCGAAGGCGGCTCTCTGGTCTGTAACCTGACGCTGAGGCGCGAAAGCGTGGGGAGC  
AAACAGGATTAGATACCCGAGTAGTCC

>Otu3666

CCAGCCTATGGGGCGCTGCAGTAAGGAATATTGGTCAATGGGCGGAAGCCTGAACCAGCC  
ATGCCGCGTGCAAGGAAGACGGCCCTATGGGTGTAAACTGCTTTTGCAGGGGAATAAACC  
TCCCGACGTGTCGGGAGTTGAATGTACTCTGAGAATAAGGATCGGCTAACTCCGTGCCAG  
CAGCCGCGGTAAATACGGAGGATCCGAGCGTTATCCGGATTTATTGGGTTTAAAGGGTGC  
TAGGTGGCTTTTTAAGTCAGGGGTGAAAGACGGCAGCTTAACTGTTCGAGTGCCTTTGAT  
ACTGAAGAGCTTGAATACACTTGAGGTAGGCGGAATGTGACAAGTAGCGGTGAAATGCAT  
AGATATGTCACAGAACACCAATTGCGAAGGCAGCTTACTAAAGTGGGATTGACACTGATG  
CACGAAAGCGTGGGGATCAAACAGGATTAGAAACCCTCGTAGTCC

>Otu3669

CCAGCCTATGGGTTCGCTCCAGTCGAGGATCTTCGGCAATGGGCGCAAGCCTGACCGAGCG  
ACGCCGCGTGTGCGAAGAAGGCCCTTCGGGTGTAAAGCACTGTCGAGGGGGAGAAAAGCC  
GCAAGGCCTGATCTATCCCTGGAGGAAGCACGGGCTAAGTTTCGTGCCAGCAGCCGCGGTA  
AGACGAACCGTGCAAACGTTATTCGGAATCACTGGGCTTAAAGGGCGCGTAGGCGGGTGG  
TCAAGTCAGGGGTGAAATCGTTCGGCTTAACCGGACAATAGCCTCTGATACTGGCCGTCT  
CGAGGGAGGTAGGGGCATGTGGAACCTCCGGTGGAGCGGTGAAATGCGTTGAGATCGGAA  
GGAACGCCCGTGGCGAAAGCGAGGTCCTGGACGTCTACTGACGCTGAGACGCGAAAGCTA  
GGGGAGCGAACGGGATTAGAAACCCGAGTAGTCC

>Otu3671

CCAGCCTATGGGTGGCAGCAGTCGAGGATCTTCGTCAATGGGCGAAAGCCTGAACGAGCG

ATGCCGCGTGCGCGATGAAGGCCTTCGGGTTGTAAAGCGCGAAAGAGGGAATAAAGGGAA  
ACTTGATTGAACCTCAGTAAGCTCGGGCTAAGTTCGTGCCAGCAGCCGCGGTAAGACGAA  
CCGAGCGAACGTTGTTTCGGAATCACTGGGTATAAAGGGCGCGTAGGCGGGTTTCTAAGTC  
CGTGGTGAAATACTCCAGCTCAACTGGAGAAGTGCCTCGGATACTGGAAGTCTCGAGTAA  
GGTAGGGGCGACGTGGAACGGCTGGTGGAGCGGTGAAATGCGTTGATATCAGTCGGAAGTC  
CGGTGGCGAAGGCGATGTGCTGGACCTTTACTGACGCTGAGGCGCGAAAGCCAGGGGAGC  
AAACGGGATTAGAAACCCCAGTAGTCC

>Otu3672

CCAGCCTACGGGATGCTGCAGTAACGAATCTTCCGCAATGCACGCAAGTGTGACGGAGCG  
ACGCCGCGTGAGGACGAAGTCCTTCGGGATGTAACTCCTGTCAGGGGTTAGAAAGTTC  
TGATCAACCCAGAGGAAGGCACGGCTAACTCTGTGCCAGCAGCCGCGGTAAGACAGAGG  
TGCCAAGCGTTAGGCGGAATCACTGGGCTTAAAGCGTGTGTAGGCGGGCCGTTAAGTGCT  
TTGTGAAATCCCCCGGCTCAACCGGGGAAGTGTGAGCAGACTGGCGGTCTTGAGCGGCC  
TAGGGGCCAGCGGAACAAGCGGTGGAGCGGTGAAATGCGTAGATATCGCTTGGAACGCCT  
GCGGTGAAAACGGCTGGCTGGGGCCCTGCTGACGCTGAGACACGAAAGCCAGGGGAGCAA  
ACGGGATTAGATACCCCTCGTAGTCC

>Otu3673

CCAGCCTATGGGAGGCAGCAGTAGGGAATCTTGCGCAATGGACGAAAGTCTGACGCAGCA  
ACGCCGCGTGAGGGACGAAGGCTTTCTGAGTTGTAAACCTCTTTTCGACAGGAACGATTGT  
GACGGTACCTGTAGAAGAAGCACCGGCCAACTATGTGCCAGCAGCCGCGGTGATACATAG  
GGTGAAGCGTTATTCGATTATTTGGGCGTAAAGAGCTCGTAGGCGGTTTCGACAAGTCG  
GGTGTTAAACCCCGAGGCTTAACCTGGGGCCGCCACCCGAACTGTTGTGACTAGAGTTT  
GGTAGGGGATCACGGAATTCTGGTGTAGCGGTGGAATGCGCAGATACCAGGAGGAACAC  
CAGTAGCGAAAGCGGCTCACTGGACCATAACTGACGCTGATGCACGAAAGCTAGGGGAGC  
AAACAGGATTAGAAACCCCGAGTAGTCC

>Otu3685

CCAGCCTACGGGAGGCAGCAGTAGGGAATATTGCGCAATGGACGAAAGTCTGACGCAGCG  
ACGCCGCGTGAGTGATGAAGGCCTTAGGGTCGTAAAGCTCTGTTGTACGGGAAGAAAAAA  
ATGACGGTACCGTATAAGAAAGGATCGGCTAACTTCGTGCCAGCAGCCGCGGTAAGACGA  
GGGATCCTAGCGTTGTTTCGGAATCATTGGGCGTAAAGAGTATGTAGGTTGCTTTACAAGT  
CAGTTGTGAAATCCCCAGGCTTAACCCGGGAAGTGCTTCTGATACTGTTTAGCTTGAGTA  
CTGTAGAGGTGAGTGGAATTCTGGTGTAGTGGTGAAATACGTAGGTATCAGGAGGAACA  
CCGGCGGCGAAGGCGGCTCACTGGACATGTACTGACACTGAGATACGAAAGCGTGGGGAG  
CAAACAGGATTAGAAACCCCGTAGTCC

>Otu3690

CCAGCCTATGGGGGGCTGCAGTCGGGAATTTTGCTCAATGGGCGCAAGCCTGAAGCAGCA  
ACGCCGCGTGAGGGGATGACGGCCTTCGGGTTGTAAACCTCTTTTCCCGGGGACGATGATG  
ACGGTACTCGGGGAATAAGTCTCGGCTAACTACGTGCCAGCAGCCGCGGTAACACGTAGG  
AGGCAAGCGTTATCCGATTCTACTGGGCGTAAAGCGCATGCAGGTGGTTTCGGTAAGTTGG  
ATGTGAAAGCTCCTGGCTCAACTGGGAGAGGTGCTTCAATACTACCGGACTTGAGAGCAG  
TAGAGGGAGGTGGAATTCCCGGTGTAGTGGTGAAATGCGTAGATATCGGGAGGAACACCA  
GTGGCGAAAGCGGCCTCCTGGACTGTTTCTGACACTCATATGCGAAAGCTAGGGTAGCAA  
ACGGGATTAGATACCCCGGTAGTCC

>Otu3692

CCAGCCTATGGGATGCAGCAGTAAGGAATATTGGTCAATGGACGCAAGTCTGAACCAGCC  
ATGCCGCGTGAAGGAAGACGGCCCTACGGGTTGTAAACCTCTTTTGTACAGGAAAAAACCC  
ACCGGTCGTGAATCGGTGCTGATGGTACTGTAAGAATAAGGATCGGCTAACTCCGTGCCA  
GCAGCCGCGGTAATACGGAGGATCCAAGCGTTATCCGGATTCAATTGGGTTTAAAGGGTGC  
GCAGGCGGAATGATAAGTCAGTGGTGAAATCCTACGGCTCAACTGTAGAAGTGCATTGA  
TACTGTCGTTCTTGAGTACACTTGGAGTGGGCGGAATGTGTCATGTAGCGGTGAAATGCT  
TAGATATGACACAGAACGCCGATCGCGAAGGCAGCTCACTAAGTTGTAAGTACGCTCAG  
GCACGAAAGCGTGGGGATCAAACAGGATTAGATACCCGCGTAGTCC

>Otu3696

CCAGCCTACGGGGGGCAGCAGTGGGGAATTTTGCACAATGCCCCGAAAGGGTGATGCAGCA  
ACGCCGCGTGAGGGATGAAGGCCTTCGGGTCGTAAACCTCTTTTCGATCGGGAAAAACGGC  
CCTGTGAAGAGCGGGGTCTGATGGTACCGGTGGAAGAAGCCCCGGCTAACTACGTGCCAG  
CAGCCGCGGTAATACGTAGGGGGCGAGCGTTGTTTCGGAATTACTGGGCGTAAAGGGCGTG  
TAGGCGGTGCGGTAAGTTGGGCGTGAAATCCCCGGGCTTAACCCGGGGGGGCGCTCCAAA

ACTGCCGTGCTAGGGTATGGGAGAGGGTAGCGGAATTCCCGGTGTAGCGGTGAAATGCGT  
AGATATCGGGAGGAACACCTGCGGCGAAGGCGGCTGCCTGGACCATTACCGACGCTGAGG  
CGCGAAAGCTAGGGGAGCAAACAGGATTAGATACCCGAGTAGTCC

>Otu3699

CCAGCCTATGGGTTGCACCAGTCGAGAATCTTCCACAATGGGCGAAAGCCTGATGGAGCG  
ACGTTTCGTGAATGAAGAAGCCCTTCGGGGTGTAAGTTCTTTTTTGGGGGAGGAATCTT  
GCCGCAAGGCGGGATGACAGTACTCCAAGAATAAGGAGGTCCTAACTCTGCGCCAGCAGG  
AGCGTAATACAGAGCCTCCGAGCGTTATCCGGATTTACTGGGCGTAAAGGATTCTGTAGG  
TGATTGAGTTAGTCTTTGGTTAAACTCATCGGCTCAACCTTTGAGCTGCCAAAGATACT  
GCTCGAATAGAGGATGTTAGAGGCTAACGGAACCGACGGTGTAGGGGTGAAATCCGTGTA  
TATCGTCGGAACACCAAAAGCGAAGGCAGTTAGCTGGGACAATCCTGACACTGAGGAAT  
GAAAGCGTGGGGATCAAAAAGGATTAGAGACCCTCGTAGTCC

>Otu3703

CCAGCCTATGGGGGGCTCCAGTGGGGAATCTTCCGCAATGGACGAAAGTCTGACGGAGCG  
ACGCCGCGTGAGGATGAAGTCCTTCGGGACGTAAACTCCTTTTGCCAGGGAAGAAAGTTA  
TTGATTGTACCTGGAGAATAAGAAGTTGCTAAACTCGTGCCAGCAGCAGCGGTAATACGA  
GTGCTTCAAGCGTTATCCGAAATCATTGGGCGTAAAGGGTGTGTAGGCGCTTCGTTAGT  
CCAGCGTTAAATCTTCCGGCTCAACCGGGAGGCTGCGCAGGAAACGGCGAAGCCTAGAGG  
ACGGTAGGGGTCTCTGGAACCTCATGGTGTAGCGGTGAAATGCGTTGATATCATGGGGAAC  
ACCGAAAGCGAAGGCAAGAGACTGGACCCTCCTGACGCTGAAACACGAAAGCGTGGGTC  
GCGAATGGGATTAGAAACCCCGTAGTCC

>Otu3704

CCAGCCTACGGGTTCACCAGTAGGGAATATTGCGCAATGGAGGAAACTCTGACGCAGCG  
ACGCCGCGTGGGTGATGAAGGCCTTCGGGTGCTAAAGCCCTGTTCGGAGGGGAAGAAAAAC  
ACGTCGTGTTAATAATAGATGTGCTTGACGGTACCCTTAAAGGAAGCACCGGCTAACTACG  
TGCCAGCAGCCGCGGTAATACGTAGGGTGCAAGCGTTGTTTCGGAATCATTGGGCGTAAAG  
CGCGCGTAGGCTGTCAATTAAGTCGGGTGTGAAATCCCTGGGCTCAACCGAGGAAGTGCA  
TCCGAAACTGATTGGCTAGAAGACGGTAGAGGAAGGTGGAATTCCTAGTGTAGAGGTGAA  
ATTCGTAGATATTAGGAGGAATACCGGTGGCGAAGGCGGCCTTCTGGGCCGTTCTTGACG  
CTGAGGCGCGAAAGCGTGGGTAGCAAACAGGATTAGAAACCCTCGTAGTCC

>Otu3710

CCAGCCTACGGGTGGCAGCAGACGAGAATATTCCGCAATGGACGAAAGTCTGACGGAGCG  
ACGCCGCGTGATGGATGAAGTGCTTCGGTACGTAAACATCTTTTATCGGGGACGAAGTTA  
TTGACGGTACCCGGTGAATAAGGGGCTCCTAACTCTGTGCCAGCAGGAGCGGTAATACAG  
AGGCCCCAAGCATTACCCGGAATCACTGGGCGTAAAGGGTGTCCAGGCGGTTCGTATTAGT  
CGTTTCGTAAAATCCGTGAGCTCAACTTACGGTCCGCGAGCGAAACGGTACGACTAGAGAG  
TGCGAGAGGTATACGGAACCTCATGGTGGAGGGGTGAAATCCGTTGATATCATGGGGAACA  
CCAAAGGCGAAGGCAGTATACTGGCGCATTTCTGACGCTCACACACGAAAGCCAGGGGAG  
CGAACGGGATTAGAAACCCAGTAGTCC

>Otu3711

CCAGCCTATGGGGGGCAGCAGTAACGAATCTTCCGCAAGTGGGCGAAAGCCTGACGGAGCG  
ACGCCGCGTGAGGAATAAGGCCTTCGGGTGTAAGTCTCTTTTAGGGTGACGAAATCAA  
GGCGACCTAACACGTCGTCAAGGTGATCGATCCAGAATAAGCCACGGCTAACTCTGTGC  
CAGCAGCCGCGGTAATACAGAGGTAGCAAGCGTTGTTTCGGAATTACTGGGCTTAAAGCGC  
GTGTAGGCGGTCGCGCAAGTACTTGGTGAAATCCCTCGGCCTAACCGAGGAAGTGCCAGG  
TATACTGCGTGACTTGAGGCGAATAGGGGTGCCTGGAACCTAGGTGGAGCGGTGAAATG  
CGTAGATATCTAGAGGAACGCCCGTGGCGAAAGCGGGGCACTGGAATCGTTCTGACGCTG  
AGACGCGAAAGCGTGGGGAGCAAACGGGATTAGATACCCCTGTAGTCC

>Otu3712

CCAGCCTACGGGAGGCAGCAGCAGGGAATCGTGCGCAATGGACGAAAGTCTGACGCCGCA  
ATGCCGCGTGAGGATGAAGGCCTTCGGGTGCTAAACTCCTTTTGCCATAGAGGAGATGC  
TATGGAGAATAAGTGACTGCTAACTCTGTGCCAGCAGCCGCGGTAATACAGAGGTCACAA  
GCGTTATCCGGATTTATTGGGCGTAAAGCGTTTCGTAGGTGATTCATTAAGTTGCTCTTC  
AAATACCGAGGCTCAACCTCGGGAAGGGGAGTAAGACTGATGGAATTGAATTGTGGTGGG  
GTTTCTGGAACCTGGTGGTGTAGTAGTGAAAATACGTTGATATCATCAGGAACTCCAAGGGC  
GAAGGCAGGAAACTAACCATATATTGACACTGAGGAACGACAGCTAGGGTAGCGAAAGGG  
ATTAGAGACCCCGTAGTCC

>Otu3714

CCAGCCTACGGGGGGCAGCAGTCGAGAATTTTTCACAATGGGCGCAAGCCTGATGGAGCG  
ACGCCGCGTGGGGGATGAATGGCTTCGGCCCGTAAACCCCTGTCATTTCGGGATCAATGCG  
CTTGTTGAACATTCCAAGCGTTGATAGTACCGGAAGAGGAAGGGACGGCTAACTCTGTG  
CCAGCAGCCGCGGTAATACAGAGGTCCCAAGCGTTGTTTCGGATTTACTGGGCGTAAAGGG  
TGCGTAGGCGGTTCGGGTAAGTCTGGTGTGAAATTTTCGGAGCTCAACTCCGAAACGGCATT  
GGATACTATTTCGGCTAGAGGTTGGGAAGGGAGACTGGAATTCTCGGTGTAGCAGTGAAAT  
GCGTAGATATCGAGAGGAACACCAGTGGCGAAGGCGAGTCTCTGGACCAATCCTGACGCT  
GAGGCACGAAAGCCAGGGGAGCAAACGGGATTAGAAACCCTAGTAGTCC

>Otu3716

CCAGCCTACGGGACGCTCCAGTCGAGGATCTTCGGCAATGGGCGCAAGCCTGACCGAGCG  
ACGCCGCGTGC GCGATGAAGGCCTTCGGGTGTAAAGCGCTGTCGAGGGGGAGGAAGGCC  
TGCAAGGGCTTGACCAATCCCTGGAGGAAGCACGGGCTAAGTTCGTGCCAGCAGCCGCGG  
TAAGACGAACCGTGCGAACGTTGTTTCGGATTCACTGGGCTTAAAGGGCGCGTAGGCGGGC  
TGTC AAGTCGGGGGTGAAATCTTTCAGCTTAACTGGAAAAGTGCCTTTGATACTGACAGT  
CTCGAGGGAGATAGGGGCGTGCGGAACCTTCGGGTGGAGCGGTGAAATGCGTAGATATCGG  
AAGGAACGCCGCTGGCGAAAGCGGCGCGCTGGATCTCTTCTGACGCTGAGGCGCGAAAGC  
CAGGGGAGCAAACGGGATTAGAAACCCTCGTAGTCC

>Otu3717

CCAGCCTATGGGAGGCAGCAGTCGAGAATTTTTCACAATGGGCGAAAGCCTGATGGAGCG  
ACGCCGCGTGGGGGATGAATGGCTTCGGCCCGTAAACCCCTGTCATTTCGGGATCAATGCG  
TCTGTTGAACATCCCAGACGTTGATAGTACCGGAAGAGGAAGGGACGGCTAACTCTGTG  
CCAGCAGCCGCGGTAATACAGAGGTCCCAAGCGTTGTTTCGGATTTACTGGGCGTAAAGGG  
TGCGTAGGCGGTTCGGCCAAGTCTGACGTGAAATCTCCGGGCCTAACCCGGAACGGCGTT  
GGATACTGGCTGGCTCGAGGAATGGAGGGGAGACTGGAATACTTGGTGTAGCAGTGAAAT  
GCGTAGATATCAAGTGGAACACCAGTGGCGAAGGCGAGTCTCTGGACATTTCTCTGTGCT  
GAGGCACGAAAGCCAGGGGAGCAAACGGGATTAGAAACCCCTGTAGTCC

>Otu3718

CCAGCCTATGGGGGGCTGCAGTGAGGAATATTGAGCAATGAACGAAAGTTTGACACAGTG  
ATAGTTTATGAGTGAGCAATGGACAGTATTATCACTGTAAAACCTCTTTTAACAAAAAAGA  
TAATGACATTTTTTTGGAGAATAAGCACTGGCTAATTCTGTGCCAGCAGCCGCGGTAACAC  
AGGTAGTGCTAACGTTATTCATCATAATTGGGTGTAAAGGATATGTAGGTGGTTTTAGAA  
TTGAATTTTTTGTA AAAAGCACTAAAAAAAATAGTGATAGGCAAATTTTACCTTAGAACT  
AGAGAGTTTTTGATCAAGTAGATAGAATTTCTTATGTAAGAGTAGAATCTATATATATTGG  
AACGACTGCCAAACGAGTTACGAAAGTATTTTTCTAATCAAACCTGACACTGAGATATGA  
AAGTATAGGGATCAAACAGGATTAGAAACCCCACTAGTCC

>Otu3720

CCAGCCTACGGGACGCACCAGTCGAGGATCTTCGGCAATGGGCGCAAGCCTGACCGAGCG  
ACGCCGCGTGGATGATGAAGGCCTTCGGGTGTAAATCCTGTCGAGGGGGATCAAGAGC  
AATTTGAGTGATCCCTGGAGGAAGCACGGGCTAAGTTCGTGCCAGCAGCCGCGGTAAGAC  
GAACCGTGCAAACGTTATTCGGAATCACTGGGCATAAAGGGCGCGTAGGCGGCTCCAAAA  
GTCAGGGGTGAAATCCGGCAGCTTAACTGTGCGAGTGCCTTTGATACTGTGGAGCTAGAG  
GGAGGTAGGGGTCTGTGGAACCTCCGGTGGAGCGGTGAAATGCGTTGATATCGGAAGGAA  
CGCCGGTGGCGAAAGCGACGGACTGGATCTCTTCTGACGCTGAGGCGCGAAAGCCAGGGG  
AGCAAACGGGATTAGAGACCCGCGTAGTCC

>Otu3721

CCAGCCTATGGGGGGCTCCAGTGGGGAAATTTGGACAATGGACGCAAGTCTGATCCAGCC  
ATGCCGCGTGAGTGAAGAAGGCCTTCGGGTGTAAAGCTCTTTTGTCCGGGAGCAAACCC  
ACATGGATAATACCTGTGTGGGATGAGAGTACCGGAAGAATAAGCACCGGCTAACTACGT  
GCCAGCAGCCGCGGTAATACGTAGGGTGCAAGCGTTAATCGGAATTACTGGGCGTAAAGC  
GTGCGCAGGTGGTTGTGTAAGCTTGATGTGAAATCCCCGGGCTCAACCTGGGAACTGCAT  
TGAGGACTACACGACTAGAGTGTGGCAGAGGGGGGTGGAATTCACGTGTAGCAGTGAAA  
TGCGTAGAGATGTGGAGGAACACCGATGGCGAAGGCAGCCCCCTGGGCTAACACTGACAC  
TCATGCACGAAAGCGGGGGGAGCAAACAGGATTAGAAACCCGAGTAGTCC

>Otu3724

CCAGCCTATGGGGGGCTGCAGTAACGAATCTTCCGCAATGCACGCAAGTGTGACGGAGCG  
ACGCCGCGTGTGGGATGAAGTCCTTCGGGATGTAAACCACTGTCAGAGGAAAGAAAGTTC  
TGATCTACCTCAGAGGAAGGCACGGCTAACTCTGTGCCAGCAGCCGCGGTAAGACAGAGG  
TGCCAAGCGTTAGGCGGAATCACTGGGCTTAAAGCGTGTGTAGGCGGGTCCCTAAGTACC

TTGTAAAATCCCACGGCTCAACCGTGGAAC TGCTCGGTATACTGAGGATCTTGAGCCACC  
TAGGGGCGAGCGGAACAAATGGTGGAGCGGTGAAATGCGTAGATATCATTTGGAACGCCA  
ATGGTGA AACAGCTCGCTGGGGGTGTGCTGACGCTGAGACACGAAAGCCAGGGGAGCAA  
ACGGGATTAGAAACCCGAGTAGTCC

>Otu3728

CCAGCCTATGGGTCGCTGCAGTGGGGAATTTTGGACAATGGGCGCAAGCCTGATCCAGCC  
ATGCCGCGTGAGTGAAGAAGGCCTTCGGGTGTAAAGCTCTTTCAGCCGGAAGAAATCG  
CACTTGCTAATACTAAGTGTGGATGACGGTACCGGAAGAAGAAGCACCGGCTAACTACGT  
GCCAGCAGCCGCGGTAATACGTAGGGTGCGAGCGTTAATCGGAATTACTGGGCGTAAAGC  
GTGCGCAGGCGGTTTTGTAAAGACAGACGTGAAATCCCCGGGCTTAACCTGGGAACTGCGT  
TTGTGACTGCAAGGCTAGAGTATGGCAGAGGGGGGTAGAATTCACGTGTAGCAGTGAAA  
TGCGTAGATATGTGGAGGAATACCGATGGCGAAGGCAGCCCCCTGGGTCAATACTGACGC  
TCATGCACGAAAGCGTGGGGAGCAAACAGGATTAGATACCCCTCGTAGTCC

>Otu3729

CCAGCCTACGGGGTGCTGCAGTCGAGAATATTTCCCAATGGACGAAAGTCTGAGGGAGCG  
ACGCCGCGTGTTGGGATGAAGGCCTTCGGGTGCTAAACCACTTTTGTGAGGGACGAATTTA  
TGACGGTACCTGAAGAATAAGAGGTTGCTAACTCTGTGCCAGCAGCAGCGGTAATACAGA  
GACCTCAAGCATTATCCGGATTTATTGGGCGTAAAGGGTCCGCAGGTGGCATGGCACGTC  
TTGCGTCAAATGTTGAAGCTCAACTTTAACACTGCGCGGGATACGGCCAAGCTAGAGGGT  
GGGAGAGGCGAGCGGAATTACCGGTGTAGTAGTAAAATGCGTTAATATCGGTAAGAACAC  
CAAATGCGAAGGCAGCTCGCTAGAACACTTCTGACACTCAGGGACGAAAGCGTGGGTAGC  
GAATGGGATTAGAACCCGTGTAGTCC

>Otu3734

CCAGCCTATGGGGGGCACCAGTGGGGAATACTGGACAATGAGCAAACGCTTGATCCGGCA  
ATGTTAAACGAATGAACTGAAAGTAATGAGCTGTAAAATTCATAAAGTTAGTATGCATAT  
AGTGAACCTTATTAATAAAGCCCCGACTAACTTCGTGCCAGCAGTCGCGGTAATACGGGGG  
GGGCGAGTGTTACTCATCATGACTAGGCGTAAAGGGTGTTAAGACCGCTAGGGTTTGTCT  
TAGTCAAAAGTTCAATTGAGCTATTGAAAAGTACTAATTAAACAACTTAGCTAAGGGTAG  
ATTGGAGAATAGAATTACTAGTTTTTAAGGGGTAGAATCCAACGAGAGAATTAAGAGGAA  
CAAAGGCGAAAGCAACTATTTATAGTCGACCAACGTTGATACACTAAAGCGTGGGGAGCA  
AACAGGATTAGATACCCTAGTAGTCC

>Otu3735

CCAGCCTACGGGGGGCACCAGGCACGAAAACCTTTACACTGCACGAAAGTGTGATAGGGGA  
ACCCTCAGTGCACTTACTATTTGTAATGCTTTTGCCAAATGTAAATAGTTTGGCGAATAAG  
TGGTGGGCAAGACCGGTGCCAGCCGCCGCGGTAACACCGGCGCCACGAGTGGGGATCGCG  
TTTATTGGGCCTAAAGCGTCCGTAGCAGGTTTTGTAAATTCCTTTGTGAAATCATTTTCGCT  
TAACGAAATGGCGTGCAGAGAACACTGCAAACTTGGAACCGGTGAGGAGTGAGAGGAAT  
TCTTTGGGGAGCGGTAAAATGCTATAATCCTTAGAAGACCACCTGTGGCGAAGGCGTCTC  
ACTAGAACGGATTCGACTGTGAGGGACGAAAGCTAGGGGAGCGATCCGGATTAGATACCC  
CCGTAGTCC

>Otu3736

CCAGCCTACGGGTCGCGAGCAGTGGAGAATATTAGGCAATGGAGTTGCTTCTGACCTAGTG  
AGGGTGAATGCATGAGGAAGGCTAGGACTCTGTAAAGTGCTTTAGGCAAGGAAGATAATA  
TCAGTAGCTGCTTTAATAAGCGCCGCCAATCTCGTGCCAGCAGCAGCGGTAAACGAGA  
GGCGCGGGTGTTATTCGTTTTGATTGGGTGTAAAGGGTATGTAGACAGTTGTGGAGGTTT  
TGATATAAACGTGGAGTATTCCTATGCGAAGAGTCTTTGAGCTTATCAAAAACAACCTAG  
TGTTGATGTTGGGTTTGGGCAATTTTGTGAGTAGGAGTAGAATCCAAACATACACGAAGG  
AACACCAAAAGCAAAGGCACCTTTCTAGTTTCAACAGACGTTGAGGTACGGAAGCTTAGG  
GATCAAAACAGGATTAGAAACCCGGGTAGTCC

>Otu3740

CCAGCCTACGGGAGGCAGCAGTGAGGAATATTGGTCAATGGGCGCAAGCCTGAACCAGCC  
ATGCCGCGTGAAAGGATGAAGGCCCTACGGGTGTAAACTTCTTTTGTACGGGACGAAACT  
CTTGCTCGTGAGCAGGACTGACTGTACTGTATGAATAAGCATCGGCTAACTCCGTGCCAG  
CAGCCGCGGTAATACGGAGGATGCAAGCGTTATCCGGATTCATTGGGTTTAAAGGGTGCG  
TAGGCGGGATGATAAGTCAGTGGTGAAAGCCTGCGGCTTAACCGTAGAATTGCCATTGAT  
ACTGTGCTTCTTGAGTGCAGTTGAGGTGGGTGGAATGTATAATGTAGCGGTAAAATGCGT  
AGATATTATACAGAACACCAATTGCGAAGGCAGCTCACTAAACTGTAACTGACGCTGAGG  
CACGAAAGCGTGGGGAGCAAACAGGATTAGAAACCCAGTAGTCC

>Otu3744

CCAGCCTATGGGAGGCTCCAGTAGGGAATATTGGGCAATGGGCGAAAGCCTGACCCAGCA  
ACGCCGCGTGCACGATGAAGGCTCTTCGGATCGTAAAGTGCTTTTCTGAGAGATGAGAAAG  
GACAGTATCTCAGGAATAAGCACCGGCTAACTCCGTGCCAGCAGCCGCGTAATACGGAG  
GGTGAAGCGTTATCCGGATTACTGGGTTTAAAGGGTGTGTAGGCGGGCTTTTAAGTCA  
GTGGTGAATCTCCGGGCTCAACCTGGAACTGCCATTGATACTATTAGTCTTGAATTTT  
GTTGAGGTAGGCGGAATAAGTCATGTAGCGGTGAAATGCATAGATATGACTTAGAACACC  
AATTGCGAAGGCAGCTTGCTAAACAAACATTGACGCTGAGGCACGAAAGCGTGGGGATCA  
AACAGGATTAGAAACCCCTGTAGTCC

>Otu3745

CCAGCCTATGGGGCGCAGCAGTGGGGAATCTTGCGCAATGGGCGAAAGCCTGACGCAGCA  
ACGCCGCGTGTGTGATGAAGGCTCTTCGGATCGTAAAGCACTGTCGCGAGGGAAGATACAC  
GACCAGATAACACCTGGGCGTTAAGACGGTACCTCGAGAGGAAGCACCGGCTAACTCTGT  
GCCAGCAGCCGCGTAATACAGAGGGTGCAGCGCTTGTTTCGGAATTATTGGGCGTGAAGC  
GCTTGTAGGCGGCCGTTTAAAGTCTCATGTGAAAGCCCTCGGCTCAACCGAGGAAGTGCAT  
GAGATACTGGACGGCTTGAATGCCGAGAGGGTTCGCGGAATTCCTGGTGTAGAGGTGAAA  
TTCGTAGAGATCGGGAGGAACACCACTGGCGAAGGCGGCGACCTGGACGGACATTGACGC  
TGAGACGCGAAAGCGTGGGGAGCAAACAGGATTAGAAACCCCTGTAGTCC

>Otu3746

CCAGCCTACGGGGTGCTCCAGTAGGGAATATTGGACAATGGGCGGAAGCCTGATCCAGCC  
ATGCCGCGTGCAGGAAGAAGGCCCTTCTGGGTCGTAAACTGCTTTTCCCGGGGGATAAAAA  
GGCCCTGCGGGGCAAATTGAAGGTACCCGGGGAATAAGCCACGGCTAACTACGTGCCAGC  
AGCCGCGTAATACGTAGGTGGCGAGCGTTGTCCGATTATTGGGTTTAAAGGGTTCGT  
AGGCGGATTAATAAGTCAGTGGTGAACCTTCAGCTTAACTGGAGACTTGCCATTGATA  
CTGTTAGTCTTGAGTACGGTCAAGGTAGGCGGAATGTGTAATGTAGCGGTGAAATGCTTA  
GATATTACACAGAACACCGATTGCGAAGGCAGCTTACTGGGCCATTACTGACGCTGATGC  
ACGAAAGCGTGGGGAGCGAACAGGATTAGAGACCCGCGTAGTCC

>Otu3748

CCAGCCTATGGGTCGCTCCAGTGGGGAATTTTGGACAATGGGGGAAACCCCTGATCCAGCC  
ATGCCGCGTGAGTGAAGAAGGCCCTTCGGGTTGTAAAGCTCTTTTGGCCGGAAAGAAAAGA  
TCTCGTCTAATAAACGAGGTTCTTGACGGTACCGGCAGAATAAGCACCGGCTAACTACGT  
GCCAGCAGCCGCGTAATACGTAGGGTGCAGCGTTAATCGGAATTACTGGGCGTAAAGA  
GTGCGTAGGCGGTTCTTTGTGTCCGCTGTGAAAGCCCCGGGCTTAACCTGGGAATGGCAG  
TGGAACCTAGAGGACTTGAATCCGGCAGAGGGGGGTGGAATGCCACGTGTAGCAGTGAAA  
TGCGTAGATATGTGGCGGAACACCGATGGCGAAGGCAGCTCCCTGGGCTGAGATTGACGC  
TCAGGCACGAAAGCGTGGGGAGCAAACAGGATTAGATAACCTAGTAGTCC

>Otu3753

CCAGCCTACGGGTTGCTGCAGTAGGGAATATTGGGCAATGGGCGAAAGCCTGACCCAGCA  
ACGCCGCGTGCACGATGAAGGCTCTTCGGATCGTAAAGTGCTTTTCTGAGAGATGAGAAAG  
GACAGTATCTCAGGAATAAGTCTCGGCTAACTACGTGCCAGCAGCCGCGTAACACGTAG  
GAGGCAAGCGTTATCCGGATTACTGGGCGTAAAGCGCATGCAGGTGGTTCGGTAAGTTG  
GATGTGAAAGCTCCTGGCTTAACTGGGAGAGGTCGTTCAATACTTCCAGACTAGAGGATG  
TGAGAGGAGAGTGGAATTCCGAGTGTAGTGGTGAATGCGTAGATATTTCGGAGGAACACC  
AGTGGCGAAAGCGCTCTCTGGCACATTTCTGACGCTCATATGCGAAAGCTAGGGTAGCA  
AACGGGATTAGAGACCCGTGTAGTCC

>Otu3755

CCAGCCTACGGGGCGCTGCAGTGGGGAATTTTGCAGCAATGGGCGCAAGCCTGACGCAGCA  
ACGCCGCGTGAGTGATGAAGGCTCTTCGGATCGTAAAGCTCTGTGCGCGGAACGATGCGT  
TCGCTGGATAATACCCAGCGGACTCGACGGTACTCGCAAAGGAAGCACCGGCTAACTCTG  
TGCCAGCAGCCGCGTAAGACAGAGGGTGCAGCGTTGTTTCGGAATTATTGGGCGTAAAG  
GGCGCGTAGGCGGCTTGGAAGTTGGATGTGAAAGCCCCGGGCTTAACCCGGGAAGTGCA  
TCCAAAAGTCTTTGCTTGAGTGTGGAGAGGGTGGCGGAATTCCCAGTGTAGAGGTGAA  
ATTCGTAGATATTGGGAGGAACACCCGTGGCGAAGGCGGCCACCTGGACAAACACTGACG  
CTGAGGCGCGAAAGCGTGGGGAGCAAACAGGATTAGAAACCCCGGTAGTCC

>Otu3756

CCAGCCTATGGGGGGCACCAGTAACGAATATTCCGCAATGGGCGAAAGCCTGACGGAGCA  
ATGCCGCGTGTGGGATGAAGCGGTTTCGCCGTGTAAACCACTGTGAGAAAGATAGAAAAGA  
TGATCATCTTCAGAGGAAGGGGCGACTAACTCTGTGCCAGCAGTCGCGGTAAGACAGAGG

CCCCGAGCGTTAGTCGGAATCACTGGGCTTAAAGGGTGCGTAGGCGGGCGCGTAAGTGCT  
TTGTGAAAGCCCTGGGCTCAACCCAGGAATTGCAGGGCATACTGCGCGTCTCGAGGTAGC  
TAGAGGCCGGTAGAACGATCGGTGGAGCGGTGGAATGCGTAGAGATCGATCGGAATGCCA  
AGGGTGAAGACAACCGGCTGGGGCTTACCTGACGCTGAGGCACGAAAGCGTGGGGAGCAA  
ACAGGATTAGAGACCCCTGTAGTCC

>Otu3758

CCAGCCTACGGGTGGCAGCAGTCGCGAATCTTTTGCAATGCGCGTAAGCGTGACAAAGCG  
AACCAAAGTGTTTTCCGCACAGGAAAACCTTTGCCAGCTGTAAAAAGGCTGGCGAATAAG  
GACTGGGCAAGACCGGTGCCAGCCGCCGCGTAATCCCGGCAGTCCAAGTCGCAGCCAAC  
ATTATTGGGTCTAAAACATCCGTAGCTTGTTTTATTAAGTTCTTTGTGAAATCCGGCATCT  
TAAGTGTGGGCGAGCAGAGAATACTGATAAGCTTGGGATCGGAAGATGCAAGGAGTACA  
CTAAAGGTAGTGGTAAAATACGTTAATCTTTGGTGGACTAACAATTGGCGAAGGCACCTT  
GCAAGTACGAATCTGACAGTGAGGGATGAAGGCCAGGGGCGCAAAATGGATTAGATACCC  
GCGTAGTCC

>Otu3759

CCAGCCTATGGGGGGCTGCAGTCGAGAATCTTCCACAATGGACGAAAGTCTGATGGAGCG  
ACGCCGCGTGATTGATGAAGTCCTTCGGGACGTAAAGATCTTTTATGAGGGAAGAAGTTT  
ATTGACGGTACCTCAGGAATAAGGGGCTCCTAATCTCGTGCCAGCAGGAGCGGTAAATACG  
AGAGCCCCGAGCGTTATCCGGAATTATTGGGCGTAAAGGGTGCGTAGGTGGTTTTGTAG  
TCGTTTGTCAAATCTTCGGGCTTAACCCGAAATCCGCAAACGAAACGGCATAACTTGAGA  
GTGTGAGAGGTATAGGGAACCTCATGGTGTAGGGGTGAAATCCGTTGATATCATGGGGAAC  
ACCAAAGCGAAGGCACTATACTGGCACACATCTGACACTTAAGCACGAAAGCGTGGGTA  
GCGAATGGGATTAGAGACCCGTGTAGTCC

>Otu3766

CCGCCTATGGGAGGCTGCAGTCGAGAATATTCGACAATGGACGAAAGCCTGATCGAGCGA  
CGCCGCGTGAGGATGAAGGCCTTCGGGTGCTAAACTGCGGTAAACACATGACAATGCAA  
ATGAGTGTGTGTTGGAAGAGGTGGGTAACTACGTGCCAGCACCAGCGTAATACGTAGA  
CCTCAAGCGTTATCCGGATTTATTGGGCGTAAAGCGCATGTAGGTGGTTTTCGCGCGTCTT  
CTGTTAAAGCCCACCGCCCAACGGTGGAAGTGCAGGAGATACGGCGAGACTAGAGGGGGT  
TAGAGATGCATAGAACGCACGGTGTAGGGGTGAAATCCGTTGATATCGTGCGGAATACCA  
AAGGCGAAGGCATTGCACTGGGACCTCCCTGACATTGAGATGCGAAAGCGTGGGGAGCAA  
AAAGGATTAGATACCCCAGTAGTCC

>Otu3769

CCAGCCTATGGGGGGCACCAGTAGGGAATATTGGACAATGGGCGAAAGCCTGATCCAGCC  
ATGCCGCGTGAGTGATGAAGGCCTTCGGGTGCTAAACTCTTTTCTGAGGGAAGAACATC  
CCGGGTAGGAAATGGCCCGGGCTTGACGGTACCTCAGGAATAAGCAACGGCTAACTCCGT  
GCCAGCAGCCGCGTAATACGGAGGTTGCGAGCGTTGTTTCGGAATAACTGGGCGTAAAGG  
GAGCGCAGGCGGTTTCGACCAGTCTAAAGTGAAAGCCCGGGGCTTAACCTCGGAAGTGCTT  
TGGATACTATCGAACTCGAGTTTCGTGAGAGGAAAGCGGAATTCAGGTGTAGCGGTGAAA  
TGCGTAGATATCTGGAGGAACACCGGTGGCGAAAGCGGCTTTCTGGCACGATACTGACGC  
TGAGGCTCGAAAGCATGGGGAGCGAACAGGATTAGAAACCCCCGTAGTCC

>Otu3770

CCAGCCTATGGGTTGCTCCAGCTACGAAACCTCTACAATGCACGCAAGTGTGATAGGGTA  
ACCCCTCGTGCTTACCGACAAGGTAGGCTTTTGCTTAGCCTAGTGCGCTAAGCGAATAAG  
TGGTGGGCAAGACCGGTGCCAGCAGCCGCGTAATCCCGCGCCACGAGTGGAAGTCACT  
TCTATTGGGTCTAAAGTATTCGTAGCCGTTCCCATAGTTTCTTGTGAAAGCCCTGTAGC  
TTAACTCAGGAATTGCAAGAAATACTGTGGGAATTGGGACTGGGAGAGGTATGGGGTATT  
GTTTGGGTAGCGGTAAAATGTTATAATCCTTACAAGACCGACTAATGCGAAGGCACCATA  
CTTGAACAGATCCGACGGTGAGGAATGAGAGCTGGGGGAGCAAACCGGATTAGAGACCCG  
AGTAGTCC

>Otu3771

CCAGCCTACGGGTTGCAGCAGTAGGGAATATTGGACAATGGGTGCGAGCCTGATCCAGCC  
ATGCCGCGTGAGGGAAGAAGGCCTTCTGGGTGTAAACTGCTTTTGCCAGGGGATAAAAC  
GACCTTGCGAGGTTAATTGAAGGTACCTGGTGAATAAGCCACGGCTAACTACGTGCCAGC  
AGCCGCGGTAATACGTAGGTGGCAAGCGTTGTCCGGATTTATTGGGTTTAAAGGGTGCGT  
AGGCGGTCCTATAAGTCAGTGGTGAATAACAGCCGCTTAACGGTTGAGGTGCCATTGATA  
CTGTTGGACTTGAGTACAGACGAGGTAGGCGGAATTGACGGTGTAGCGGTGAAATGCATA  
GATATCGTCAAGAACCCGATAGCGAAGGCAGCTTACTAGACTGTAAGTACGCTGAGGC

ACGAAAGTGTGGGGATCAAACAGGATTAGAGACCCCAGTAGTCC

>Otu3772

CCAGCCTATGGGTCGCTGCAGTCGCGAAACCTTGACAATGCGCGAAAGCGTGATCGGGGA  
ACTCTGAGTGCCAACCTTACGGTTGGCTTTTGATCAGCTTGAATAGCTGGTAGAATAAGG  
GCTGGGTAAGTCTCGTGCCAGCCGCCGCGGTAACACGAGCAGCCCGAGTGGTGGCCACGA  
ATATTGAGTCTAAAACGCATGTAGCCGGCTTGTTAAGTTCCCCGTGAAATCTTCAGGCTC  
AACCTGAAGGCGCGCGGGGAATACTAGCAGGCTAGGGAATGGAAGAGGCCAAGGGTACTG  
TAAGGGGAGGAGTAAAATCCTGTAATCCTTGCAGGACCATCGGTGGCGAAAGCGCTTGGC  
CAAGACATGTCCGACGGTGAGATGCGAAGGCTAGGGGAGCAAATCGGATTAGAAACCCC  
GTAGTCC

>Otu3774

CCAGCCTATGGGGCGCAGCAGTGGGGAATTTTCCGCAATGGGCGCAAGCCTGACGGAGCA  
AGACCGCGTGGGGGACGAAGGTTTGTGGATTGTAAACCCCTTTTGATTGGGGAGAAGTTC  
TGACGGTACCAATCGAATCAGCATCGGCTAACTCCGTGCCAGCAGCCGCGGTAATACGGA  
GGATGCAAGCGTTATCCGGAATTATTGGGCGTAAAGCGTCCGTAGGTGGTTATTCAAGTC  
AGTTGTTAAAGCGTGGGGCTTAACCCCATAAAGGCAAATGAACTGAATGGCTAGAGTGC  
GATAGGGGCAAGGGGAATTTCCAGTGTAGCGGTGAAATGCGTAGATATTGGAAAGAACAC  
CGGTGGCGAAAGCGCCTTGCTGGGTCTGCACTGACACTGAGGGACGAAAGCTAGGGGAGC  
GAAAGGGATTAGAGACCCCTCGTAGTCC

>Otu3775

CCAGCCTATGGGGTGCACCAGTCGAGAATCTTCCACAATGGACGGAAGTCTGATGGAGCG  
ACGCCGCGTGATTGATGAAGTCCTTCGGGACGTAAAGATCTTTTATGAGGGAAGAAGTAT  
ATTGACTGTACCTCATGAATAAGGGGCTCCTAATCTCGTGCCAGCAGGAGCGGTAATACG  
AGAGCCCCAAGCGTTATCCGGAATTATTGGGCGTAAAGGGTGCCTAGGCGGTTGTGTTAG  
TCGAATGTTAAAGACCCGAGCTTAACTCGGGGAACGCGTTCGAAACGGCACGACTTAGAA  
TGAAGGAGGGGTGTGTAGAACTCATGGTGTAGGGGTGAAATCCGTTGATATCATGGGGAA  
TACCAAAGCGAAAGCAGCACACTGGCCTTTTATTGACGCTGAGGCGCGAAAGCGTGGGT  
AGCGAATGGGATTAGATACCCCTCGTAGTCC

>Otu3776

CCAGCCTATGGGAGGCTGCAGTGGGGAATATTGCACAATGGGCGAAAGCCTGATGCAGCG  
ACGCCGCGTGAGGATGACGGCCTTCGGGTTGTAAACCTCTTTCAGCAGGGACGAAGCGTA  
AGTGACGGTACCTGCAGAAGAAGCACCGGCTAACTACGTGCCAGCAGCCGCGGTAATACG  
TAGGGTGCAAGCGTTGTCCGATTTATTGGGCGTAAAGAGCTCGTAGGCGGTTTGTGCGC  
TCGGATGTGAGAACCAGCAGCTTAACTGCTGGCCTGCATTGATACGGGCAGACTTGAGG  
ACGGTAGGGGAGACTGGAACCTCCTGGTGTAGCGGTGGAATGCGCAGATATCAGGAAGAAC  
ACCGGTGGCGAAGGCGGGTCTCTGGGCCGTTCCTGACGCTGAGGAGCGAAAGCGTGGGT  
GCAAACAGGATTAGAGACCCCTGTAGTCC

>Otu3777

CCAGCCTATGGGGGCGCAGCAGCAACGAATATTCCGCAATGGGCGCAAGCCTGACGGAGCG  
ACGCCGCGTGAAAGGATGAAGTCCCTCGGGATGTAAACTTCAATAGTCTGATAGGAAGTAA  
CCCGGTGCAACAGGCCGGGAAGTTGACCAGCAGATGAAAGGGGCGGCTAACTCCGTGCCA  
GCAGCCGCGGTAAGACGGAGGCCCGAGCGTTGTTCCGGAATTATTGGGCTTAAAGCACAT  
GTAGGCGGACTGGTAAGTGCTTCGTGAAATCCCCGGGCTCAACCCGGGAATTGCTTGGCA  
TACTGTCGGTCTTGAGGCAGGTATGGGTCACTGGAACCTTAGGTGTAGCGGTGAAATGCG  
TAGATATCTAAGGGAACGCCGTGGCGAAAGCGGGTGACTGGGCCTGTCCTGACGCTGAG  
ACGCGAAGGCGTAGGGAGCAAACGGGATTAGATACCCTAGTAGTCC

>Otu3781

CCAGCCTACGGGTCGCTGCAGGCGCGAAAACCTCTACACTGCACGAAAGTGTGATAGGGGG  
ATCCAAAGTGCTTATACATTAGTATAGGCTTTTGCCAAAGACAAATCCTTTGGGGAATAA  
GTGGTGGGCAAGACCGGTGCCAGCCGCCGCGGTAACACCGGCGCCACAAGTGGCAACCGT  
ATTTATTGGGCCTAAAGCGTTCGTAGCCGGCTTAGTAAATCTTCTGTGAAATTGTTTGGC  
TTAACCAAACAACGTGCAGGAGACACTGCTATGCTTGAGACCGGGAGGGGCTAGGGGTAT  
TCTTGGGGGAGCGGTAAAATGTTGTAATCCCTTGAAGACCACCTGTGGCGAAGGCGCCTA  
GCCAGAACGGATCTGACGGTGAGGGACGAAAGCTAGGGGAGCGATCCGGATTAGATACCC  
TCGTAGTCC

>Otu3782

CCAGCCTACGGGAGGCAGCAGTGGGGAATTTTGGACAATGGGCGAAAGCCTGATCCAGCG  
ACGCCGCGTGAGGATGAAGGTCTTCGGATTGTAAACTCCTTTTAGAGGGGACGAATAAA



TTGACAGTACCCTCAGAAAAAGCCACGGCTAACTACGTGCCAGCAGCCGCGGTAATACGT  
AGGTGGCGAGCGTTACTCGGAATTACTAGGCGTAAAGCGCATGTAGGCGGTTGGATAAGT  
CTGCGGTTAAATCTCCCGGCTCAACTGGGAAGTGTCCGCAGAACTATCCGGCTTGAGTG  
TGGCAGGGGGAGACGGAATTCGCGGTGTAGCGGTGAAATGCGTAGATATCGGGAGGAACA  
CCAATGGCGAAAGCAGTCTCCTGGGCCAATACTGACGCTGAGATGCGAAAGCTAGGGGAG  
CAAACAGGATTAGAAACCCCTGTAGTCC

>Otu3785

CCAGCCTATGGGACGCAGCAGTGGGGAATCTTGCGCAATGGACGAAAGTCTGACGCAGCG  
ACGCCGCGTGGGTGAAGAAGGCCTTCGGGTGTAAAGCCCTGTCGAGTGGGAAAAACGAC  
ATCCGAAATAATACGTCGGGTGAGTGCTGGTACCACTAGAGGAAGCACCGGCTAACTCCG  
TGCCAGCAGCCGCGGTAATACGGAGGGTGAAGCGTTGTTTCGGAATTATTGGGCGTAAAG  
GGCAGGTAGGTGGTCTTATAAGTCTACTGTGAAATCCCTGGGCTTAACCCAGGAAGTGCG  
GTGGATACTGTAAGACTAGAGTGCTGGAGGGGTGCGTGGAATTCCCGGTGTAGCGGTGAA  
ATGCGTAGATATCGGGAGGAACACCAGAGGCGAAGGCGGCGCACTGGACAGCAACTGACA  
CTCAACTGCGAAAGCGTGGGGAGCAAACAGGATTAGAGACCCGCGTAGTCC

>Otu3787

CCAGCCTACGGGTGGCACCAGTGGGGAATATTGGACAATGGGCGCAAGCCTGATCCAGCC  
ATGCCGCGTGAGTGATGACGGCCTTAGGGTTGTAAAGCTCTTTCACCCACGACGATAATG  
ACGGTAGTGGGAGAAGAAGCCCCGGCTAACTTCGTGCCAGCAGCCGCGGTAATACGAAGG  
GGGCTAGCGTTGTTTCGGAATCACTGGGCGTAAAGCGTACGTAGGCGGATTTTTAAGTCAG  
AGGTGAAATCCTGGAGCTCAACTCCAGAACTGCCTTTGATACTGGAAGTCTTGAGTTCGG  
GAGAGGTGAGTGGAAGTCCAGTGAGAGGTGAAATTCGTAGATATTGGCAAGAACACCA  
GTGGCGAAGGCGGCTCACTGGCCCGGAACTGACGCTGAGACGCGAAAGCGTGGGGAGCAA  
ACAGGATTAGAAACCCCTAGTAGTCC

>Otu3793

CCAGCCTACGGGGCGCTGCAGGTAGGTAACTTTTGCAATGCACGAAAGTGTGACAAAGCG  
AGCCAGAGTGTTTTCTCTATTATGTGAAAATCTTTTGCGGGACGTAAAAAGTCCCGTGA  
ATAAGGACTGGGCAAGACTGGTGCCAGCCGCCGCGGTAATCCCAGCAGTCCAAGTCGCAG  
CCACAATTATTGGGTCTAAAAATATCCGTAGCTTGCTTTGCAAGTCTCTTGTGAAATCGGG  
ACTCTTAAAGTTCCGCCGTGCAAGAGATACTGCTTAGCTAGAGACCGGGAGACGTAAGAA  
GTACATCTAGAGTAGCGGTAAAATGCGTTGATCCTTGATGGACTAACAAACAGCGAAGGCA  
TCTTACGAGAACGATCTGACAGTGAGGGATGAAGGCTAGGGGCGCAAAGTGGATTAGAG  
ACCCAGTAGTCC

>Otu3801

CCAGCCTATGGGGTGCTCCAGTGGGGAATTTTGCAATGGGGGAAACCCCTGATGCAGCA  
ACGCCGCGTGAGGATGAAGTCCCTTGGGATGTAACTCCTTTTCGACCGGGACGATAATG  
ACGGTACCGGTGGAAGAAGCCCCGGCTAACTCTGTGCCAGCAGCCGCGGTAATACAGAGG  
GGGCGAGCGTTGTTTCGGAATTATTGGGCGTAAAGGGCGCGTAGGCGGTGCGGTAAGTCTT  
TTGTGAAATCTCCGGGCTCAACTCGGAGTCTGCAGGAGAACTGCCGTGCTTGAGTGTGG  
GAGAGGTGAGTGGAATTCGCGGTGTAGCGGTGAAATGCGTAGATATCAGGAGGAACACCG  
GTGGTGTAGACGGCTTTCTGGACCGACACTGACGCTGAGACACGAAAGCGTGGGTAGCAA  
ACAGGATTAGAAACCCCTGTAGTCC

>Otu3802

CCATGGGTGGCTGCAGTAGGGAATATTGGTTAATGGGCGAAAGCCCCGAACCAGCAACGCC  
GCGTGTGCGATGAAGGCCTTCGGGTGCTAAAGCACTTTTTGGAGGGAAGAGGAAGGACGG  
TACCTCCAGAATAAGCCTCGGCTAACTACGTGCCAGCAGCCGCGGTAACACGTAGGAGGC  
GAGCGTTATTCGATTTACTGGGCGTAAAGCGCGTGTAGGCGGTTTCGGTAAGTTGGATGT  
GAAAGCTCCTGGCTTAACTAGGAGAGGTGCTTCAATACTGTTCGGAAGTTGAGAGTGGTAGA  
GGGAGATGGAATTCGCGGTGTAGTGGTGAATGCGTAGATATCCGGAGGAACACCAAGTGG  
CGAAAGCGATCTCCTGGACCATTTCTGACGCTCAGACGCGAAAGCTAGGGTAGCAAACGG  
GATTAGATACCCGCGTAGTCC

>Otu3808

CCAGCCTATGGGTCGCTCCAGTTCGGAATATTCGGCAATGGGCGGAAGCCTGACCGAGCG  
ACGCCGCGTGCGGGATGAAGGCCCTTTGGGTGTAAACCGCTGTCACAGGTGAGCAAATC  
AGGTTGGTTTAAACGCCAGCTTGTTGAGTTAAGCTTGAGAGGAAGCCCCGCTAATCAC  
GTGCCAGCAGCGGCGGTAATACGTGAGGGGCGAACGTTGTTTCGGTGTCACTGGGCTTAAA  
GGGCGCGTAGGTGGCTGCGTAAGTAAGGTGTGAAAGCCCACGGCTTACCCGTGGAATTGC  
GCCTTATACTGCGTGGCTTGAGGATCTCAGGGGAAGGGGGAAGTCCAGGTGTAGCGGTGA

AATGCGCAGATATCTGGGGGAAGGCCGGCGGCGAAGGCGCCCTTCTGGGAGATTCTTGAC  
ACTGAGGCGCGAAAGCGTGGGGAGCAAACAGGATTAGAAACCCTAGTAGTCC  
>Otu3810  
CCAGCCTACGGGTGGCACCAGTAACGAATATTCCGCAATGGGCGCAAGCCTGACGGAGCG  
ACGCCGCGTGAGGATGAAGCCCTTCGGGGTGTAAGCTGCTGTCAGGGGTAAAGCAAGAAC  
GTGAGCTATCCCAGAGGAAGGGGCGACTAACTCTGTGCCAGCAGTCGCGGTAATACAGAG  
GCCCCGAGCGTTAATCGGAATCACTGGGCTTAAAGGGTGCGTAGGCGTTTCCGCAAGTGC  
CTTGTGAAATCCCACGGCTCAACCGTGGAAGCTGCTTGGTAGACTGCGGAAATTGAGGTTG  
GTAGAGGCGGCTGGAACGGATGGTGGAGCGGTGAAATGCGTAGATATCATCCGGAACGCC  
AAAGGTGAAGACAGGTGCGTGGGCCAATTCTGACGCTGAGGCACGAAAGCGTGGGGAGCA  
AACGGGATTAGAAACCCTTGTAGTCC  
>Otu3811  
CCAGCCTACGGGACGCTGCAGTCAAGAACTTTGGCAATGCACGAAAGTGTGACCAAGCG  
ACGCCGCGTGATTGATGAAGCCCTTCGGGGTGTAAGATCTTTTATGCATGAGGAAATTA  
TTGACGTTAGTGCATGAATAAGGGGCTCCTAACTCTGTGCCAGCAGGAGCGGTAATACAG  
AGGCCCCGAGCGTTATCCGGAATTATTGGGCGTAAAGGGTGAGTAGGTGGTTTAGTTAGT  
CGAATTTCAAAGATCTGGGCTCAACCCAGGGAAGGGATTGAAACGGCTAGACTTGAGTA  
TGTGAGAGGTGAACGGAAGCTCATGGAGTAGGGGTGAAATCCGTTGATATCATGGGGAACA  
CCAAATGCGAAGGCAGTACGCTGGCGCATATTTGACACTGAAGCACGAAAGCGTGGGTAG  
CGAATGGGATTAGATACCCGAGTAGAC  
>Otu3816  
CCAGCCTATGGGTGCGCAGCAGTGGGGAATTTTGCAGCAATGGGCGAAAGCCTGACGCAGCG  
ACGCCGCGTGGGTGATGAAGGCCCTTCGGGTGTAAAGCCCTGTGGGGAGGGAAGAATAAA  
GGACGGCGAATACCCGTCCCGATGACGGTACCTCCTTAGCAAGCACCGGCTAACTCTGTG  
CCAGCAGCCGCGGTAAGACAGAGGGTGCAAACGTTGTTTCGGAATTACTGGGCGTAAAGCG  
CGTGTAGGCGGCTACGCAAGTCGGGTGTGAAAGCCCTTGGCTCAACCGAGGAAGTGCATT  
CGAAACTGCGCAGCTTGAGTCCCGAGAGGATGGTGGAAATCTCGGTGTAGAGGTGAAAT  
TCGTAGATATCGAGAGGAACACCGGTGGCGAAGGCGGCCATCTGGACGGTGAAGTGCCT  
GAGACGCGAAAGCGTGGGGAGCAAACAGGATTAGATACCCGAGTAGTCC  
>Otu3822  
CCAGCCTACGGGTGGCAGCAGTTTCGAATCATTCACAATGGGCGAAAGCCTGATGGTGC  
ATGCCGCGTGAGGGATGAAGGTCTTCGGATTGTAAACCTCTGTCACTGGGGAAGAAACGC  
TTCAAGTTAACAGCTTGAAGCCTGACTTAACCCGAGAGGAAGCAGTGGCTAACTCTGTG  
CCAGCAGCCGCGGTAATACAGAGACTGCAAGCGTTATTTCGGATTCACTGGGCGTAAAGGG  
TGCGCAGGCAGCCAAGTGTGTGAGGCGTGAAAGCCCGGGGCTTAACCCGGAATTGCACC  
TCAAACCTACATGGCTAGAGCATTTGGAGAGGGTAGCAGAATTCATGGTGTAGCAGTGAAT  
GCGTAGATATCATGAGGAATACCAGAGGCGAAGGTGGCTATCTGGACGGCAACTGACGCT  
CAGGCACGAAAGCGTGGGGAGCAAAGGGATTAGATACCCCTAGTAGTCC  
>Otu3823  
CCAGCCTATGGGACGCAGCAGTGGGGAATCTTGCAGCAATGGACGAAAGTCTGACGCAGCC  
ACGCCGCGTGAGTGAAGAAGGCCCTTCGGGTGTAAAGCTCTGTGAGCGGGACGAACATC  
TTGGTGGTTAATAGCCACCAGGACTGACGGTACCGCTAAAGGAAGCACCGGCTAACTCTG  
TGCCAGCAGCCGCGGTAATACAGAGGGTGCAAGCGTTGCTCGGAATCATTGGGCGTAAAG  
GGTAGGTAGGTGGTCTCATTTGTCTGGGGTGAAAGCCTTGAGCTTAACCTGAGAAGTGCC  
CCGGAACCGGTGAGACTAGAGTCTTGAGAGGGTCTGTGGAATTCCCGGTGTAGCGGTGAA  
ATGCGTAGAGATCGGGAGGAACACCAGAGGCGAAGGCGGCGACCTGGACAAGTACTGACA  
CTCAACTACGAAAGCGTGGGGAGCAAACAGGATTAGATACCCCTGTAGTCC  
>Otu3827  
CCAGCCTACGGGGTGACACAGTCGAGGATCTTCCGCAATGGGCGCAAGCCTGACGGAGCG  
ACGCCGCGTGTGGGATGAAGGCCCTTCGGGTGTAAACCACTGTCACTCGTTATGAAAGGG  
TTCAACGTTAACAGCGTTGGAAACTGACAAAGGCGAGAGAGGAAGCCACGGCTAACTTCG  
TGCCAGCAGCCGCGGTAAGACGAAGGTGGCGAGCGTTGTTTCGAGTCACTGGGCATAAAG  
CGCACGTAGGCGACGACGTAAGTTGGGTGTGAAATCCCTCGGCCCAACCGAGGAAGTGC  
CCCAGTACTGCGTTGCTTGAGGATCAAAGGGGTGCATGGAATTCCCGGTGGAGCGGTGAA  
ATGCGTTGATATCGGGAGGAAGTCCCGCGGCGAAAGCGGTGCACTGGTTGATTTCTGACG  
CTGAGGTGCGAAAGCCAGGGGAGCAAACGGGATTAGATACCCGAGTAGTCC  
>Otu3828  
CCAGCCTATGGGTGCGCTCCAGCTAAGAATCTTCCGCAATGGGGGAAACTCTGACGGAGCG

ACGCCGCGTGGAGGATGAAGTGCTTCGGCATGTAACTCCTTTTGCCAGGGAAAAAGTTA  
TTGATTGTACCTGGAGAATAAGAGGTTGCTAAACTCGTGCCAGCAGCAGCGGTAATACGA  
GTGCCTCGAGCGTTATCCGGAATCATTGGGCGTAAAGGGTGTGTAGGCGGTCTGTAGT  
CTCGCGTAAAATCTTTCGGCTCAACCGAGAGTCCGCGCGGGAAACGGCATGACTAAGAGG  
ATGGCAGGGGTCTTCGGAACCTCATGGTGTAGCGGTGAAATGCGTTGATATCATGGGGAAC  
ACCAAAAGCGAAGGCAGAAGACTGGGCCACTCCTGACGCTGAAACACGAAAGCGTGGGTC  
GCGAATGGGATTAGATACCCCCGTAGTCC

>Otu3831

CCAGCCTACGGGATGCAGCAGTGGGGAATCTTGACACAATGGGGGAAACCCTGATGCAGCG  
ACGCCGCGTGAGCGATGAAGCCCTTCGGGATGTAAAGCTCTTTCGGCAGGGACGATAATG  
ACGGTACCTGCAGAAGAAGCTGCGGCTAACTACGTGTCAGCAGCCGCGGTAATACGTAGG  
CAGCAAGCGTTGTTTCGGAGTTACTGGGCGTAAAGAGTGTGTAGGCGGTTCCCTAAGTTTCG  
GTGTGAAATCTCCCGGCTCAACTGGGAGGGTGCGCCGAAAACCTGGGGGACTGGAGTATGG  
GAGAGGAAAGCGGAATTCCTGGTGTAGCGGTGAAATGCGTAGATATCAGGAGGAACACCG  
GTGGTGTAGACGGCTTTCTGGACCATTACTGACGCTGAGACACGAAAGCGTGGGGAGCAA  
GCAGGATTAGATACCCCAGTAGTCC

>Otu3833

CCAGCCTATGGGGGGCACCAGTGAGGAATATTGGTCAATGGACGCAAGTCTGAACCAGCC  
ATGCCGCGTGAAGGATGAAGGCCTTCGGGTGTAAACTTCTTTTATGGGGGAAGAAACC  
CTCCCTTTCTATGGAGGTTGACGGTACCCTAGGAATAAGCACCGGCTAACTCCGTGCCAG  
CAGCCGCGGTAATACGGAGGGTGCAAGCGTTATCCGGATTTACTGGGTTTAAAGGGTGTG  
TAGGCGGGTCTTTAAGTCAGTGGTGAATCTCCGGGCTCAACCCGGAACCTGCCATTGAT  
ACTATTGGCCTTGAATTTTGTGAGGGGGGCGGAATAAGTCATGTAGCGGTGAAATGCAT  
AGATATGACTTAGAACACCGATAGCGAAGGCAGCTCCCTAAGCAAACATTGACGCTGAGG  
CACGAAAGCGTGGGGATCAAACAGGATTAGATACCCCCGTAGTCC

>Otu3837

CCAGCCTATGGGTGGCAGCAGTGGGGAATTTTGCGCAATGGGGGAAACCCTGACGCAGCA  
ACGCCGCGTGGAGGGTGAAGTACCTTGGTACGTAAACTCCTTTTCGATCGGGACGATAATG  
ACGGTACCCGGAGAAGAAGCTGCGGCTAACTACGTGCCAGCAGCCGCGGTAATACGTAGG  
CAGCAAGCGTTGTTTCGGAGTTACTGGGCGTAAAGAGTGCGTAGGCGGTTCCGTAAGTTTG  
TTGTGAAATCTCCCGGCTTAACTGGGAGGGTGCGGCGAAAACCTGCGGGGCTGGAGTGTGG  
GAGAGGTAAGCGAAATTCCTGGTGTAGCGGTGAAATGCGTAGTTATCGGGAGGAACACCA  
GCGGTGTAGACGGCTTACTGGACCATGACTGACGCTGAGGCACGAAAGCGTGGGGAGCAA  
ACAGGATTAGAAACCCCCGTAGTCC

>Otu3844

CCAGCCTACGGGGGGCTCCAGTGGGGAATATTGGACAATGGGGGAAACCCTGATCCAGCA  
ATGCCGCGTGAGTGATGAAGGCCTTAGGGTTGTAAAGCTCTTTCACCCGTGACGATGATG  
ACGGTAACGGGAGAAGAAGCCCCGGCTAACTTCGTGCCAGCAGCCGCGGTAATACGAAGG  
GGGCAAGCGTTGTTTCGGAATGACTGGGCGTAAAGGGCGCGTAGGCGGTTTGCCAAGTTGG  
AGGTGAAATCCCGGGGCTCAACCTCGGAATTGCCTTCAAAACCTGGCTGGCTAGAGTATGG  
AAGAGGGTCGTGGAATTCACAGTGTAGAGGTGAAATTCGTAGATATTGGGAAGAACACCA  
GTGGCGAAGGCGGCGACCTGGTCCATAACTGACGCTGAGGCGCGACAGCGTGGGGAGCAA  
ACAGGATTAGAGACCCCTGTAGTCC

>Otu3845

CCAGCCTATGGGATGCTGCAGTCAAGAATATTTCGTCAATGGGCGAAAGCCTGAACGAGCG  
ACACCGCGTGACAGGATGAAGGCCTTCGGGTCGTAAACTGCGGTAGATAAGTGACAATGCA  
AATGAGTGCTTATCGGAAAGAGGTGGGTAACCTACGTGCCAGCACCAGCGGTAAAACGTAG  
ACCTCAAGCGTTATCCGATTTATTGGGCGTAAAGCGCGTGTAGGGGGTTTTGTGCGTCT  
TCTGTTAAAGCCACCGCTAACGGTGAAGTGCAGGAGATACGGCAAGACTAGAGGAGG  
TTAGAGGTGCATGGAACGCACGGTGTAGGGGTGAAATCCGTTGATATCGTGCGGAACACC  
AAAGGCGAAGGCAATGCACTGGGACCTTCTGACCCTGAGACGCGGAAGCGTGGGTAGCA  
AAAAGGATTAGATACCCTAGTAGTCC

>Otu3847

CCAGCCTACGGGAGGCAGCAGCCAAGAATCTTCGCAATGGGGGAAACCCTGACGGAGCG  
ACGCCGCGTGAAGGAAGAAGGTCTTCGGATCGTAAACTTCTTTTATCAGGAAAGAATAAG  
GAGCGAGGAAATGCGGCTCCGATGACGGTACCTGATGAATAAGCCCCGGCTAATTACGTG  
CCAGCAGCCGCGGTAATACGTAAGGGGCGAGCGTTGCTCGGAATTACTGGGTGTAAAGGG  
CTTGTAGGCGGGCTTACAAGTCGAGTGTAAAGACCACGGCTCAACTGTGGGAATGCATT

CGAAACTGTAAGCCTTGAGTCTGATGGAGGGTAATGGAATTCCTGGTGTAGCGGTGAAAT  
GCGTAGAGATCGGGAAGAACACCGAAGGCTAAAGCAGTTACCTATGTCAAGACTGACGCT  
GAGGAGCGAAAGCATGGGGATCAAACAGGATTAGATACCCCTGTAGTCC

>Otu3851

CCAGCCTATGGGAGGCTCCAGTGGGGAATCTTGCGCAATGGGCGAAAGCCTGACGCAGCG  
ACGCCGCGTGTGCGATGAAGGTCTTCGGATCGTAAAGCACTGTCGCGAGGGACAAAGGAA  
GTGATGGTACCTCGAGAGGAAGCACCGGCTAACTCTGTGCCAGCAGCCGCGGTAATACAG  
AGGGTGCAGAGCGTTGTTTCGGAATTATTGGGCGTAAAGCGCTGGTAGGTGGTTCTTCAAGT  
CGCTTGTGAAAGCTCCCGGCTCAACCGGGAAAGTGCGGGCGAAACTGGAGGACTTGAGTG  
CCGGAGAGGGTTCGCGGAATTCCCGGTGTAGAGGTGAAATTCGTAGATATCGGGAGGAACA  
CCAGAGGCGAAGGCGGCGACCTGGAAGGTGACTGACACTGAGCAGCGAAAGCGTGGGGAG  
CAAACAGGATTAGATACCCCGGTAGTCC

>Otu3852

CCAGCCTATGGGAGGCAGCAGTAAGGGATATTGCGCAATGGGCGAAAGCCTGACGCAGCA  
ACGCCGCGTGGAGGATGAAGGCCTTCGGGTCTGTAAGTTCGTTTTGCGTCTGACGAGGAAG  
GACGGTAGGACGCGAAGAAGTCACGGCTAACTACGTGCCAGCAGCCGCGGTAAACGTAG  
GTGGCGAGCGTTATCCGGATTACTGGGCGTAAAGGGTGTGCAGGCGGGGACACAAGTGG  
TGTATGAAAGCACCCAGCTAAACTGGGTAAGGTTATGCCAGACTGTGTTTCTAGAGGACG  
AGAGAGGGGCGTGGAATTCCGGGTGTAGTGGTGAATGCGTAGAGATCCGGAGGAACCCC  
AGAGGCGAAGGCGGCGCCCTGGCTCGTACCTGACGCTGATACACGAAAGCATGGGTAGCG  
AACGGGATTAGATACCCGAGTAGTCC

>Otu3854

CCAGCCTATGGGATGCACCAGTCGAGGATCTTCGGCAATGGGCGCAAGCCTGACCGAGCG  
ACGCCGCGTGCGGGATGAAGGCCTTCGGGTGTAAACCGCTGTCAGTGGGGAGGAAAGGC  
AGGAGGGTTCTCCCTCTTGTGTTGACCTATCCGCAGAGGAAGTACGGGCTAAGTTTCGTGCC  
AGCAGCCGCGGTAAGACGAACCGTACGAACGTTATTTCGGAATCACTGGGCTTAAAGGGTG  
CGTAGGCGGCCCCGAAAGTTGGGTGTGAAAGCCCTCGGCTCAACCGAGGAATTGCGCCCA  
AACTACCGGGCTCGAGGGAGACAGAGGTGAGCGGAACTTAGGGTGGAGCGGTGAAATGC  
GTTGATATCCTAAGGAACACCAGGAGCGAAAGCGGCTCACTAGGTCTCTTCTGACGCTGA  
TGCACGAAAGCTAGGGGAGCGAACGGGATTAGAAACCCCTCGTAGTCC

>Otu3855

CCAGCCTATGGGGGCGCAGCAGTGGGGAATATTGGACAATGGGGGAAACCCTGATCCAGCA  
ATGCCGCGTGAGTGATGAAGGCCTTCGGGTGTAAACTGCTTTTGTACGGAACGAAAAGG  
TTTGGCCTAATAAGCTGAGCTCATGACGGTACCGTAAGAATAAGCACCGGCTAACTACGT  
GCCAGCAGCCGCGGTAATACGTAGGGTGCAGCGTTAATCGGAATTACTGGGCGTAAAGC  
GTGCGCAGGCGGTTATGTAAGACAGATGTGAAATCCCCGGGCTCAACCTGGGAACTGCAT  
TAGTGACTGCATAGCTGGAGTACGGCAGAGGGGGATGGAATTCGCGGTGTAGCAGTGAAA  
TGCGTAGATATGCGGAGGAACACCGATGGCGAAGGCAATCCCCTGGGCCTGTACTGACGC  
TCATGCACGAAAGCTGGGGAGCAAACAGGATTAGAAACCCCTGTAGTCC

>Otu3856

CCAGCCTATGGGGGCGCAGCAGTAACGAATCTTCCCCAATGCACGAAAGTGTGAGGGAGCG  
ACGCCGCGTGGAGGACGAAGTCCTTCGGGATGTAAACTCCTGTCAGGGGTACCAAGTTC  
TGAGGAACCCAGAGGAAGTGGCGGCTAACTCTGTGCCAGCAGCCGCGGTAAGACAGAGG  
CCACAAGCGTTAGGCGGAATCACTGGGCTTAAAGCGTGTGTAGGCGGACTCTTAAGTGCC  
TTGTGAAATCCCACGGCTTAACCGTGGAACTGCTGGGCATACTGGGAGTCTTGAGCTGTC  
TAGGGGCGACTGGAACAAACGGTGGAGCGGTGAAATGCGTAGATATCGTTTGGAAACGCCA  
ATGGTGAAAACAGGTCGCTGGGGACATGCTGACGCTGAGACACGAAAGCCAGGGGAGCAA  
ACGGGATTAGATACCCCCGTAGTCC

>Otu3857

CCAGCCTATGGGTGCGTGCAGTGAGGAATATTGGTCAATGGGCGCAAGCCTGAACCAGCC  
ATCCCGCGTGCAGGAAGAAGGCGCTATGCGTTGTAAACTGCTTTTCCAGGGGAAGAAAAC  
CCGCTACGTGTAGCGGCTTGCCGGTACCTTGGAATAAGCATCGGCTAACTCCGTGCCAG  
CAGCCGCGGTAATACGGAGGATGCGAGCGTTATCCGGATTATTGGGTTTAAAGGGAGCG  
TAGGTGGATTTGTAAGTCAGTGGTGAATCTCTCAGCTTAACTGAGAACTGCCATTGAT  
ACTGCAGATCTTGAGTACAGATGATGTGGGCGGAATATGACATGTAGTGGTGAAATACTT  
AGATATGTCATAGAACACCGATTGCGAAGGCAGCTCACAAAACCTGTAAGTACACTGAGG  
CTCGAAAGTGCGGGGATCAAACAGGATTAGATACCCCCGTAGTCC

>Otu3859

CCAGCCTATGGGGGGCAGCAGCTAAGAATATTCCACAATGGACGAAAGTCTGATGGAGCG  
ACGCCGCGTGACGATGAAGGCCCTTCGGGTGTAAAGTCCTTTTCGTGCGGGAAGATCTTT  
CTACTAATGAACAATTAGTAGGATCGACTGTACCGCAGGAAGAAGCCCCGGCTAATTACG  
TGCCAGCAGCCGCGGTAATACGTATGGGGCGAGCGTTATTCGGATTTATTGGGCGTAAAG  
GGTATGCAGGGGGCTTGTAAAGTCGGAAGTGAAATTTCCAGGCTCAACCTGGAAATTGCT  
CTCGATACTGGCAGGCTAGAGTTTGGCAGAGGAGAATGGAATTCAGGTGTAGGGGTGAA  
ATCTGTAGATATCTGGAAGAACACCAGTGGTGAGGACGATTCTCTGGGCCAAAAGTACC  
CTCAGATACGAAAGCCAGGGGAGCAAACGGGATTAGATAACCCGTGTAGTCC

>Otu3867

CCAGCCTATGGGGTGCTGCAGGCGCGAAACCTCTGCAATGCGCGAAAGCGTGACAGGGGA  
ACTCTGAGTGCTACACCACGTGTGTAGCTTTTTGCAAGCTTAAGACGCTTGTAGAATAAG  
GGCTGGGTAAGACTAGTGCCAGCCGCCGCGGTAACACTAGCGGCCCAAGTGGTGTCCACG  
AATATTGGGTCTAAAGAGCCCCGTAGCTGGTCCGTAAAGTTTCCTGTGAAATCTCAGAGCT  
CAACTTTGAGGCGTGAGGAAATACTGGCGCGACTTGAGAGCGGGGGAGGTCAAGAGTAC  
TCATGGGGTAGCGGTAAATGTTGTAATCCTATGAGGACTTCCAGTGGCGAAGGCGCTTG  
ACCAAACGCGTCTGACAGTGAGGGACGAAGGCTAGGAGAACGAATCGGATTAGAGACCC  
GTGTAGTCC

>Otu3870

CCCAGCCTATGGGGTGCTGCAGCAACGAATATTGGGCAATGGGGGAAACCTGACCCAGC  
GACGCCGCGTGACAGGAGGAGGCCCTTCGGGGTGTAAGTGTCTCGGGACCAACAAGTG  
ATACGGGTGAATAATCCGTAAAGTTGAGTCGTCCCGAAGGAAGCCTCGACTAACTCTGTG  
CCAGCAGTCGCGGTAATACAGAGGAGGCAAGCGTTGCTCGGAATCATTGGGCTTAAAGAG  
CGTGTAGGCGGCTTGGTAAAGTGTGCGGTGAAATCCCATGGCTCAACCATGGAAGTGC  
GCAACTGCTTGCTTGAGGTGCGTAGAGGTGCCTGGAAGTCTAGGTGGAGCGGTGAAAT  
GCGTAGATATCTAGAGGAACGCCGAGGCGAAAGCGGGGCACTGGACCGATTCTGACGCT  
GAGACGCGAAAGCGTGGGGAGCAAACAGGATTAGAAACCCCTAGTAGTCC

>Otu3879

CCAGCCTATGGGGTGACAGCAGTGGGGAATTTTGGACAATGGGGGAACCCCTGATCCAGCAA  
TGCCGCGTGCTGTGAAGAAGGCCCTTCGGGTGTAAGCACTTTTGTGAGGAACGAAACGGT  
TTTGGCTAATACCTAGAACTAATGACGGTACCTGAAGAATAAGCACCGGCTAACTACGTG  
CCAGCAGCCGCGGTAATACGTAGGGTGCAAGCGTTAATCGGAATTACTGGGCGTAAAGCG  
TGCGCAGGCGGTTGTGTAAGTCTGATGTGAAATCCCCGGGCTCAACCTGGGAATTGCATT  
GGAGACTGCATAGCTAGAATCTGGCAGAGGGGGGTAGAATTCCACGTGTAGCAGTGAAAT  
GCGTAGAGATGTGGAGGAACACCGATGGCGAAGGCAGCCCCCTGGGCTAAGATTGACGCT  
CATGCACGAAAGCGTGGGGAGCAAACAGGATTAGATAACCCCTCGTAGTCC

>Otu3882

CCAGCCTACGGGTCGACAGCAGGCGCGAAACCTTTACAATGCACGAAAGTGTGATAGGGGG  
ATACTCAGTGCTTACGGCTCTGCTGTAGGCTTTTGTGATCGTAAATAGATCGGCGAATA  
AGTGGTGGGTAAGACTGGTGCCAGCCGCCGCGGTAACCCAGCGCCACAAGTGGTCATCG  
CGATTATTGGGCCTAAAGCGTTCGTAGCCGGAGTGGCAAATCTCTTGTGAAATTGTTGCG  
CTTAACCGGACAGCGTGACAGGAGACACTACCACCCTCGAGACCGGGAGGCGTAAGAAGTA  
TGGCATGGGGACTGGTAAAATGGGATAATCCATGCTAGACTACCGATGGCGAAGGCATCT  
TACGAGAACGGATCTGACGGTGAGGAACGAAAGCCAGGGGAGCGAACCAGGATTAGAAACC  
CCTGTAGTCC

>Otu3884

CCAGCCTATGGGTGGCTGCAGTGGGGAATATTGGACAATGGGCGCAAGCCTGATCCAGCC  
ATGCCGCGTGAGTGATGAAGGCCCTAGGGTTGTAAAGCTCTTTCACCCACGACGATAATG  
ACGGTACCCGGAGAAGAAGCCCCGGCTAACTTCGTGCCAGCAGCCGCGGTAATACGAAGG  
GGGCTAGCGTTGCTCGGAATTACTGGGCGTAAAGGGAGCGTAGGCGGATCGTTAAGTTGG  
GGGTGAAAGCCCCGGGGCTCAACCTCGGAAATGCCTTCAATACTGGCGATCTTGAGTATGG  
GAGAGGTAAGTGGAAGTCCGAGTGTAGAGGTGAAATTCGTAGATATTTCGGAAGAACACCA  
GTGGCGAAGGCGACTTACTGGCCATTACTGACGCTGAGGCTCGAAAGCGTGGGGAACAA  
ACAGGATTAGAGACCCCCGTAGTCC

>Otu3885

CCAGCCTATGGGATGCTCCAGTAAGGAATATTGGTCAATGGAGGCAACTCTGAACCAGCC  
ATGCCGCGTGAAAGGATGAAGGCCCTATGGGTGTAAGTCTTTTGTACGGGAAAAAACC  
CTTGAACGTGTTGAGGCTGATGGTACCGTAAGAATAAGGATCGGCTAACTCCGTGCCAG  
CAGCCGCGGTAATACGGAGGATCCAAGCGTTATCCGGATTCATTGGGTTTAAAGGGTGCG

TAGGCGGCTTATTAAGTCAGTGGTGAAATCCCGAGGCTCAACTTCGGAACCTGCCATTGAT  
ACTGATAAGCTTGAGTGTAATGAAGTGGGCGGAATGTGTCGTGTAGCGGTGAAATGCTT  
AGATATGACACAGAACACCGATTGCGAAGGCAGCTCACTAACTACAACCTGACGCTGAGG  
CACGAAAGCGTGGGGATCAAACAGGATTAGAAACCCCTGTAGTCC

>Otu3887

CCAGCCTACGGGGTGCTGCAGCGGGGAATTTTGGACAATGGGGGCAACCCTGATCCAGCC  
ATGCCGCGTGCGTGAAGAAGGCCTTCGGGTGTAAAGCGCTTTTGTGGGGAAGAAAAGG  
GGTCTTGAATAAAGGATTCTGCTGACGGTACCCAAAGAAAAAGCACCGGCTAACTACGT  
GCCAGCAGCCGCGTAATACGTAGGGTGCAAGCGTTAATCGGAATGACTGGGCGTAAAGA  
GTGCGTAGGCGGTGACTTAAGATGGGTGTGAAATCCCCGGGCTTAACCTGGGAAGTGCAT  
TCATGACTGGGTCGCTGGAGTGCGGTAGAGGGGGGTGGAATTCCTGGTGTAGCAGTGAAA  
TGCGTAGAGATCAGGAGGAACACCGATTGGCGAAGGCAGCCCCCTGGCCCGTGACTIONGACGC  
TGAGGCACGAAAGCGTGGGGAGCAACCAGGATTAGAAACCCGCGTAGTCA

>Otu3888

CCAGCCTATGGGAGGCATCAGGGACGAATATTGGGCAATGGGCGAAAGCCTGACCCAGCG  
ACGCCGCGTGTTGGGAGGAAGTCCTTCGGGATGTAAACCACTGTCAGGGGTACCAAGTGA  
AAGGGCCTAATACGCCCTCTAATTGAGGAGCTCCAAGGAAGCCACGGCTAACTTCGTGC  
CAGCAGCCGCGGTAAGACGAAGGTGGCTAGCGTTGTTTCGAATCACTGGGCTTAAAGAGC  
ATGTAGGCGGCTGTAAAGCACTTTGTGAAATCCCTCGGCTTAACCGGGGAATTGCTTGG  
TGACTGGCAGGCTTGAGGCAGGTAGGGGCGCGTGGAACCTTGGTGGAGCGGTGAAATG  
CGTAGATATCAAGAGGAACGCCGGAGGCGAAAGCGATGCGCTGGGCCTGTCCTGACGCTG  
AGATGCGAAAGCTAGGGGAGCAAACAGGATTAGAAACCCCTAGTAGTCC

>Otu3891

CCAGCCTATGGGTTGCTCCAGGTTCGGTCGGAACAGTGTACTGAACCAGGCCGCTGCTTT  
CTGACTGCTCTTCTCTTCGGAAAAGAAGAAGACAGTCGGTCGCGGTTCCGGTTGAACTT  
GCCCCGGAAATAGATTGGTCTCCGACGGTGACACCGAATGTGTTGTAACGGTAGATCGC  
GCGCGGCACAGAATTGAGGTGTTGAAGTAGGTGTTTCGCGTTCAATGATTCGTTGCGAAT  
GTATTCATAGGCGTGCCGTGGAACGTGCGTGTCGCCGACTTCGTACACGCCAACGATAAC  
GGCGTGCCGTTTCTTCCGTACTCGGCCCGGAAATTGTTGACGAGCACCGTCACTTCGCT  
GATCGCGTCAATGTTGGAAGTGAACGGGTACTGCGGATTAGAGACCCCAGTAGTCC

>Otu3893

CCAGCCTATGGGGTGCAACCAGTTAAGGAAATTTTTTCGATGCCCCGAAGGGTGAACGAGTA  
AGCCAGAGTGTTTCCTTTACGGAAACTTTTGTCTGCTGTAGAAAGGCAGACGAATAAGGA  
CTGGGCAAGACCGGTGCCAGCCGCCGCGGTAATCCCGGCGGTCCAAGTCGCATCCACAAT  
TATTAGGTCTAAAACATCCGTAGCTTGTTTTGTAAAGTCTCTTGTGAAATCTCAAGTCTTA  
AGCTTGAGGCGTGCAAGAGATACTGCTGAACTCGAGATCGGAAGACGCAAAGAGTACGAT  
TGAGGTAGTGGAATAATATGTTAATCTTAATCGGACTAACAATGGCGAAGGCACCTTTGCG  
AGTACGAATCTGACAGTGAGGGATGAAGGCTAGGGGCGCAAAGGGATTAGAAACCCCGG  
TAGTCC

>Otu3894

CCAGCCTACGGGATGCTCCAGTGGGGAATCTTGACAATGGGGGCAACCCTGATGCAGCG  
ACGCCGCGTGAGCGATGAAGCCTTTTCGGGGTGTAAGCTCTTTTCGACAGGAACGATTATG  
ACGGTACCTGGAGAAGAAGCTGCGGCTAACTACGTGCCAGCAGCCGCGGTAATACGTAGG  
CAGCAAGCGTTGTTTCGGAGTTACTGGGCGTAAGGAGTGCGTAGGCGGTCCTATAAGTTCC  
GTGTGAAATCTCCCGGCTCAACTGGGAGGGTGCGCGGAAGACTGTAGGGCTTGAGTGTGG  
GAGAGGTAAGCGGAATTCTTGGTGTAGCGGTGAAATGCGTAGATATCAGGAGGAACACCT  
GTGGTGTAGACAGCTTACTGGACCATAACTGACGCTGAGGCACGAAAGCGTGGGTAGCAA  
ACAGGATTAGAAACCCCTGTAGTCC

>Otu3897

CCAGCCTACGGGAGGCAGCAGTGAGGAATTTTCCGCAATGGGCGAAAGCCTGACGGAGCG  
ACGCCGCGTGTTGGGATGAAGGCCCTTCGGGTGTAAGCTCTTTTCGACAGGAACGATTATG  
AAGGTACCCTTGGAGGAAGCCCCGGCTAACTACGTGCCAGCAGCCGCGGTAAGACGTAGG  
GGGCGAGCGTTATTCGGAATTATTGGGCGTAAAGCGCCAGTAGGCGGATTGGAAAGTTTCG  
TGAAGAAAGACCCGGGCTCAACTCGGGGAACGGCACGAATACTTCCAGTCTTGAGGCAAT  
CAGAGGGTGATGGAATTCCTGGTGTAGCGGTGAAATGCGTGGATATCGGGAGGAACACCA  
GTGGCGAAGGCGATCACCTGGGGTTGATCTGACGCTGAGTGGCGAAAGCTAGGGGAGCAA  
ACGGGATTAGAAACCCCGTATCC

>Otu3898

CCAGCCTATGGGTCGCAGCAGTGAGGAATATTGGGCAATGGACGCAAGTCTGACCCAGCA  
ACGCCGCGTGAGGATGAAGGTCCTTTGGATTGTAACTCCTTTTGCAGGGGAAGAGTGAG  
GACGGTACCCTGAGAATAAGTCACGGCTAACTACGTGCCAGCAGCCGCGGTAATACGTAG  
GTGACGAGCGTTATCCGGATTTATTGGGCGTAAAGCGCACGCAGGCGGCGCAACAAGTCT  
GACGTGAAATCTCCCGGCTTAAC TGGGAGCGGTCGTTGGAACTGTTGTGCTTGAGGCGA  
TGAGAGGGGTGTGGAATTCCCGGTGTAGTGGTGAATGCGTAGATATCGGGAGGAACATC  
AGTGCGCAAAGCGGCACCCTGGCATTAGCCTGACGCTCATGTGCGAAAGCGAGGGGAGCG  
AACGGGATTAGAAACCCCGGTAGTCC

>Otu3901

CCAGCCTATGGGGGGCACCAGTAAGGGATATTGCACAATGGGCGAAAGCCTGACGCAGCA  
ACGCCGCGTGAAAGGATGAAGGCCTTCGGGTGTAACTTTTTTTTATTCGGGACGAGCAAG  
GACGGTACCGAGTGAATAAGTCACGGCTAACTACGTGCCAGCAGCCGCGGTAACACGTAG  
GTGGCGAGCGTTATCCGGATTTACTGGGCGTAAAGCGTGTGCAGGCGGGCGGTCAAGTGG  
TGTATGAAAGCACTGCGCTCAACGCAGTGACCGTAGGCCAGACTGACTGTCTGGAGGGCG  
AGAGAGGGGCGTGGAATTCCGGGTGTAGTGGTGAATGCGTAGAGATCTGGAGGAACCCC  
AGAGGCGAAGGCGGCGCCCTGGCTCGCACCTGACGCTCAGACACGACAGCATGGGGAGCG  
AACGGGATTAGATACCCGCGTAGTCC

>Otu3902

CCAGCCTATGGGGTGCAGCAGGCGCGAAACTCTCCAATGTGCGAAAGCGTGAGAGGGGA  
ATTCGCAGTGCTTACGGTTTAGCCGTAGGCTTTTGCCATGTGTAAATAGCATGGCGAATA  
AGTGGTGGGTAAAGACTGGTGCCAGCCGCCGCGGTAAACACCAGCGCCACGAGTGGCTATCG  
CGATTATTGGGCCTAAAGCGTCCGTAGTCGGTCTGTACATCTTCTGTGAAATCGCAACG  
CTCAACGTTGCGGCATGCGGGAGACACGGCAGAACTTGAGACCGGGAGGCGTGTAGGGTA  
TTCCACGGGGACCGGTAAAATGGTATAATCCGTGGGGGACCACCTGTGGCGAAGGCGCTA  
CACGAGAACGGATCTGACGATGAGGGACGAGAGCCAGGGGAGCAAACCGGATTAGATACC  
CCCGTAGTCC

>Otu3904

CCAGCCTATGGGTTGCTGCAGTGAGGAATATTGGGCAATGGACGCAAGTCTGACCCAGCA  
ACGCCGCGTGAGGATGAAGGTCCTTTGGATTGTAACTCCTTTTGCCGGGGAAGAGTGAG  
GACGGTACCCGGAGAATAAGTCACGGCTAACTACGTGCCAGCAGCCGCGGTAATACGTAG  
GTGACAAGCGTTATCCGGATTTATTGGGCGTAAAGCGCACGCAGGCGGCTGATTAAGTCT  
GACGTGAAATCTCTCGGCTTAACCGGGAGCGGTCGTTGGAACTAATCGGCTTGAGGCGA  
TGAGAGGGGTGTGGAATTCCCGGTGTAGTGGTGAATGCGTAGATATCGGGAGGAACACC  
AGTGCGCAAAGCGGCCTTCTGGACTGTTTCTGACACTCATATGCGAAAGCTAGGGTAGCA  
AACAGGATTAGAGACCCCTGTAGTCC

>Otu3905

CCAGCCTATGGGTGGCAGCAGTGGGGAATTTTGGACAATGGGGGCAACCCTGATCCAGCC  
ATTCCGCGTGAGTGAAGAAGGCCTTCGGGTGTAAAGCTCTTTTGTCCGGAGCGAAAAGG  
TTACGGTGAATATCCGTGACTACTGACGGTACCGGAAGAATAAGCACCGGCTAACTACGT  
GCCAGCAGCCGCGGTAATACGTAGGGTGCAGCGTTAATCGGAATTACTGGGCGTAAAGC  
GTGCGCAGGCGGTTTTGTAAAGCCAGACGTGAAATCCCCGGGCTTAACCTGGGAATGGCGT  
TTGGGACTGCAAGGCTCGAGTACGGCAGAGGGGACTAGAATTCCTGGTGTAGCAGTGAAA  
TGCGTAGATATCAGGAGGAATACCGATGGCGAAGGCAGGTCCTGGGTTAGTACTGACGC  
TCATGCACGAAAGCGTGGGGAGCAAACAGGATTAGAAACCCGCGTAGTCC

>Otu3913

CCAGCCTATGGGACGCTGCAGTTAAGAATCTTGCGCAATGGGCGCAAGCCTGACGCAGCG  
ACGCCGCGTGCGCGATGAAGGCCTTCGGGTGTAAAGCGCAATAGACAGGGACGAAGAAA  
GTGACGGTACCTGTTGAAAGCACCGGCTAACTACGTGCCAGCAGCCGCGGTAATACGTAT  
GGTGTGAAAGCGTTGTTGCGATTTACTGGGCGTAAAGAGCGCGGGGCGGATAATTAAGTCA  
GGTGTGAAATCTTCGGGCTCAACCCGGAGACTGCACCTGAACTAATGATCTCGAGTCCC  
GGAGAGGCAGGCAGAAATTCCTGGTGTAGCGGTGAAATGCGTAGATATCAGGAGGAATACC  
AATGGCGAAGGCAGCCTGCTGGACGGTGACTGACGCTGAGGCGCGAAAGCGTCGGGAGCA  
AACAGGATTAGATACCCTCGTAGTCC

>Otu3914

CCAGCCTACGGGAGGCTCCAGTGGGGAATATTGGACAATGGGCGCAAGCCTGATCCAGCC  
ATGCCGCGTGAGTGATGAAGGCCTTAGGGTTGTAAAGCTCTTTTACCTGGGAAGATAATG  
ACGGTACCAGGAGAATAAGCCCCGGCTAACTTCGTGCCAGCAGCCGCGGTAATACGAAGG  
GGGCTAGCGTTGTTGCGATTTACTGGGCGTAAAGCGCACGTAGGCGGATCTTTAAGTCAG

GGGTGAAATGCCGGGGCTCAACCCCGGAACTGCCTTTGATACTGGGGATCTCGAGTCCGG  
GAGAGGTGAGCGGAACTGCGAGTGTAGAGGTGAAATTCGTAGATATTCGGAAGAACACCA  
GTGGCGAAGGCGACTCGCTGGACAAGTATTGACGCTGAGGTGCGAAAGCGTGGGGAGCAA  
ACAGGATTAGATACCCCGTAGTCC

>Otu3916

CCAGCCTACGGGAGGCAGCAGTGGGGAATATTGGACAATGGGGGCAACCCTGATCCAGCC  
ATGCCGCGTGAGTGAAGAAGGCCTTAGGGTTGTAAAGCTCTTTCGCTAGGGACGATAATG  
ACGGTACCTAGATAAGAAGCCCCGGCTAACTTCGTGCCAGCAGCCGCGGTAATACGAAGG  
GGGTTAGCGTTGTTTCGGAATCACTGGGCGTAAAGCGCACGCAGGCGGATTGATAAGTCAG  
AGGTGAAATCCCGGAGCTCAACTTCGGAATTGCCTTTGATACTGTCTATCTTGAGGTGCA  
GAGAGGTTGGCGGAATTCCTAGTGTAGAGGTGAAATTCGTAGATATTAGGAAGAACACCA  
GTGGCGAAGGCGGCCAACTGGCTCGATACTGACGCTCATGTGCGAAAGCGTGGGGAGCAA  
ACAGGATTAGATACCCTTGTAAGTCC

>Otu3917

CCAGCCTATGGGGCGCAGCAGTGGGGAATTTTTCGCAATGGGGGAAACCCTGACGCAGCA  
ACGCCGCGTGAGGATGAAGTCCCTTGGGACGTAAACTCCTTTCGATCGGGACGATTATG  
ACGGTACCGGAAGAAGAAGCCCCGGCTAACTTCGTGCCAGCAGCCGCGGTAATACGAGGG  
GGGCGAGCGTTGTTTCGGAATTACTGGGCGTAAAGGGCATGTAGGCGGCTTTGTAAGCCCG  
GCGTGGAAGCCCACGGCTCAACCGTGGGATTGCGTTGGGAACTGCAAGGCTTGAATCATG  
GAGAGGGAGCTAGAATTCCTGGTGTAGGGGTGAAATCTGTAGAGATCAGGAAGAATACCA  
GTGGCGAAGGCGAGCTCCTGGCCAATGATTGACGCTGAGGTGCGAAAGTGTGGGGATCAA  
ACAGGATTAGAAACCCTTGTAAGTCC

>Otu3918

CCAGCCTACGGGTTGCTGCAGTGGGGAATCTTTCGCAATGGGCGAAAGCCTGACGCAGCG  
ACGCCGCGTGGGTGATGAAGGCCTTCGGGTGTAAAGCCCTGTGGGGAGGGACGAATAAG  
TCATGGCTAATATCCATGGTGATGACGGTACCTCCTTAGCAAGCACCGGCTAACTCTGTG  
CCAGCAGCCGCGGTAAGACAGAGGGTGCGAACGTTGTTTCGGAATTACTGGGCGTAAAGCG  
CGTGTAGGCGGTGGGGTAAGTCGGATGTGAAAGCCCGGGGCTCAACCTCGGAAGTGCAGT  
CAATACTACCTCGCTGGAGTCCCGGAGAGGATGGTGGAACTCTCGGTGTAGAGGTGAAAT  
TCGTAGATATCGAGAAGAACACCGGTGGCGAAGGCGGCCATCTGGACGGTGAAGTACGCT  
GAGACGCGAAAGCGTGGGGAGCAGACAGGATTAGATACCCCAGTAGTCC

>Otu3921

CCAGCCTACGGGTCGCTCCAGTGGGGAATATTGGACAATGGGCGCAAGCCTGATCCAGCC  
ATGCCGCGTGAGTGACGAAGGCCTTAGGGTTGTAAAGCTCTTTTGGCGGGGAAGATAATG  
ACGGTACCCGCGAGAATAAGCTCCGGCTAACTTCGTGCCAGCAGCCGCGGTAATACGAAGG  
GTGCGAGCGTTGTTTCGGAATTACTGGGCGTAAAGGGTTTCGTAGGCGGGAATGCAAGTCAA  
GTGTGAAATCCCCAGGCTTAACCTGGGACGTGCATTTGAGACTGTGTTTCTTGAGTTTCG  
GAGAGGGTGGTGGAATTGCTGGTGTAGGAGTGACATCCGTAGAGATCAGCAGGAACACCG  
GAGGCGAAGGCGACCACCTGGCCGAATACTGACGCTGAGGAACGAAAGCGTGGGGAGCAA  
ACAGGATTAGATACCCGAGTAGTCC

>Otu3922

CCAGCCTACGGGTGGCTGCAGTGGGGAATCTTTCGCAATGGACGAAAGTCTGACGCAGCG  
ACGCCGCGTGGGTGATGAAGGCCTTCGGGTGTAAAGCCCTGTGGGGAGAGACGAATAAG  
TGTAGCCTAATACGTTACATGATGACGGTATCTCCTTAGCAAGCACCGGCTAACTCTGTG  
CCAGCAGCCGCGGTAAGACAGAGGGTGCAAACGTTGTTTCGGAATTACTGGGCGTAAAGCG  
TGTGTAGGCGGTCTTGTAAGTCGGATGTGAAAGCCCGGGCTCAACCCGGAAGTGCAGT  
CGATACTGCGAGACTTGAGTATCGGAGAGGTTGGTGGAAATCTCGGTGTAGAGGTGAAAT  
TCGTAGATATCGAGAGGAACACCGGTGGCGAAAGCGGCCAACTGGACGAATACTGACGCT  
GAGACACGAAAGCGTGGGGAGCAAACAGGATTAGAGACCCGCGTAGTCC

>Otu3929

CCAGCCTACGGGGCGCTGCAGTAACGAATCTTCCGCAATGTACGCAAGTATGACGGAGCG  
ACGCCGCGTGTTGGGACGAAGCCCTTCGGGGTGTAACCACTGTCAGGGGTTAGAAAGTTC  
TGATCGACCCAGAGGAAGGCACGGCTAACTCTGTGCCAGCAGCCGCGGTAAGACAGAGG  
TGCCAAGCGTTAGGCGGAATCACTGGGCTTAAAGCGTGTGTAGGCGGATTTCTAAGTACC  
TTGTGAAATCCCACGGCTCAACCGTGGAACTGCTTGGTATACTGGTTATCTTGAGCTGTC  
CAGGGGCGACCGGAACAAATGGTGGAGCGGTGAAATGCGTAGATATCATTTGGAACGCCA  
ATGGTGAAAACAGGTCGCTGGGGACATGCTGACGCTGAGACACGAAAGCCAGGGGAGCAA  
ACGGGATTAGAAACCCTCGTAGTCC



>Otu3931

CCAGCCTACGGGGGGCAGCAGTTTGGAAATTTTGCACAATGGGCGAAAGCCTGATGCAGCG  
ACGCCGCGTGAGGATGAAGGCCTTCGGGTGTAAAGTCTTTTGTCTCGGGAACAATTTT  
TGAGCGTACCGAGAGAATAAGAGGTTGCTAACTCTGTGCCAGCAGCAGCGGTAATACAGA  
GACCTCAAGCGTTATCCGGAATCATTGGGCGTAAAGCGTACCGATAGGTGGCTTACAAAG  
TCAGAAGTGAAATCTCTCAGCTTAACTGGGAGAATGTCTTTTGAACTTGTAAGCTAGAG  
GGGCAAAGAGGAAGCTGGAACGAACGGTGTAGTAGTGAAATGCGTTGATATCGTTCGGAA  
CACCAATAGCGTAGGCAGGCTTCTGGGTGCCACCTGACACTGCTAGGACGAAAGCGTGGG  
TAGCGATAAGGATTAGAAACCCTGGTAGTCC

>Otu3934

CCAGCCTATGGGGCGCTCCAGTGGGGAATATTGCACAATGGGCGGAAGCCTGATGCAGCG  
ACGCCGCGTGAGGGATGACGGCCTTCGGGTGTAAACCTCTTTCAGCAGGGACGAAGCGA  
GAGTGACGGTACCTGCAGAAGAAGCGCCGGCCAACTACGTGCCAGCAGCCGCGGTAAGAC  
GTAGGGCGCGAGCGTTGTCCGGATTTATTGGGCGTAAAGAGCTCGTAGGCGGCTTGTCTGC  
GTCGACTGTGAAAACCTCAGGGCTCAACCCTGAGCTTGCACTCGATACGGGCAGGCTCGAG  
TTCGGTAGGGGAGACTGGAATTCCTGGTGTAGCGGTGAAATGCGCAGATATCAGGTGGAA  
CACCGGTGGCGAAGGCGGGTCTCTGGGCCGATACTGACGCTGAGGAGCGAAAGCGTGGG  
AGCGAACAGGATTAGAGACCCTAGTAGTCC

>Otu3939

CCAGCCTACGGGTGGCAGCAGTGGGGAATATTGGACAATGGGCGCAAGCCTGATCCAGCC  
ATGCCGCGTGAGTGATGACGGCCTTAGGGTGTAAAGCTCTTTCGGCGGGGACAAAACGG  
CGACCGCGAATAACGGTTGTTAATGATGGTACCACCAGAAGAAGCCCCGGCTAACTACGT  
GCCAGCAGCCGCGGTAATACGTAGGGGGCAAGCGTTGTTCGGATTTCATTGGGCGTAAAGG  
GCATGTAGGCTGTTATGTAAGTGTGGATTTAAAGGCGGAGGCTTAACCTCTAGTTTGGTC  
TGCAAACCTGCGTAGCTTGAGTGTAGAAGGGGAAACTGGAATTCGCGGTGTAGGGGTGAAA  
TCTGTAGATATGCGGAAGAATACCTGTGGCGAAGGCGAGTTTCTGGTCTATAACTGACGC  
TGAAATGCGAAAAGTGTGGGTAGCAAACAGGATTAGAAAACCCTAGTAGTCC

>Otu3940

CCAGCCTCGGGTTCGAGCAGTCGAGGATCTTTGGCAATGGGCGCAAGCCTGACCAAGCGA  
CGCCGCGTGCGCGATGAAGGCCTTCGGGTGTAAAGCGCTGTGAGGGGGAGGAAGCCGC  
AAGGTTGACCTATCCCTGGAGGAAGGACGGGCTAAGTTTCGTGCCAGCAGCCGCGGTAAGA  
CGAACCGTCCTAACGTTGTTCGGAATCACTGGGCTTAAAGGGCGCGTAGGCGGGCTGCCA  
AGTCTAGGGTGAAATCTTTCGGCTTAACCGGGAATAGCCTTGGATACTGGTAGTCTCGA  
GGGGGGTAGGGGCCGTTGGAACCTCCGGTGGAGCGGTGAAATGCGTTGATATCGGAAGGA  
ACGCCGGTGGCGAAAGCGAACGGCTGGACCTCTCTGACGCTGAGGCGCGAAAGCCAGGG  
GAGCAAACGGGATTAGATACCCCAGTAGTCC

>Otu3942

CCAGCCTATGGGGGGCAGCAGTGGGGAATTTTGGACAATGGGCGCAAGCCTGATCCAGCC  
ATGCCGCGTGAGTGAAGAAGGCCTTCGGGTGTAAAGCTCTTTCGGCGGGGAAGAAATTA  
CTTGGGCGAATAACCCTGAGTAGATGACGGTACCCGAAGAAGAAGCACCGGCTAACTACGT  
GCCAGCAGCCGCGGTAATACGTAGGGTGCAGCGTTAATCGGAATTACTGGGCGTAAAGC  
GTGCGCAGGCGGTTTTGTAAAGACAGGTGTGAAATCCCCGGGCTTAACCTGGGAACTGCGC  
TTGTGACTGCAAGACTGGAGTACGGCAGAGGGGGGTGGAATTCCTGGTGTAGCAGTGAAA  
TGCGTAGAGATCAGGAGGAACACCGATGGCGAAGGCAGCCCCCTGGGTCCGTACTGACGC  
TCATGCACGAAAGCGTGGGGAGCAAACAGGATTAGAGACCCCAGTAGTCC

>Otu3943

CCAGCCTATGGGAGGCAGCAGGCGCGAAAACTCTCCAATGCGCGAAAGCGTGAGAGGGGA  
ATCCCAAGTGCTTAAGCATTACGCTTAGGCTTTTTTCGATTGCAAAAAAATCGGAGAATA  
AGTGGTGGGCAAGACCGGTGCCAGCAGCCGCGGTAACCCGCGCGCCACAAGTGGCAACCG  
TGTATTTGGCCTAAAGCGTCCGTAGCCGGTCTGTGCATCCCTTGTGAAATTGACCCGCT  
TAACGGGTGAGCGTGCAGGGGACACGGCAGAACTTGGAACCTGGGAGGCGTCAGAGGTATT  
GTTGGGGGAACGGTAAAATGTTATAATCCCAGCAAGACCACCGATGGCGAAGGCATCTGA  
CGAGAACAGCTTCGACGGTGAGGGACGAAAGCTAGGGGAGCAAACCGGATTAGATACCCC  
AGTAGTCC

>Otu3945

CCAGCCTATGGGAGGCAGCAGTGAAGGAATATTGGTCAATGGGCGCAAGCCCGAACCAGCC  
ATGCCGCGTGAAAGACGAAGGCCCTCGTGGTTCGTAAACTTCTTTAGTATAGGGCGAAAAA  
CCAAACGGGCTTTGGGCTTGACAGTACTATGCCAAAAGCATCGGCTAACTCCGTGCCAG

CAGCCGCGGTAATACGGAGGATGCGAGCGTTATTTCGGATTTATTGGGTTTAAAGGGTGCG  
CAGGCGGCCTAATAAGTCAGTGGTGAAATACCGTTGCTCAACAACGGGGCTGCCATTGAT  
ACTGTAAGGCTAGGGCCTGTTTCGACGTACGCGGAATGCGGCAAGTAGTGGTGAAATACAT  
AGATATGCCGCAGAACACCGATAGCGAAGGCAGCGTACGAGGATATGGCCGACGCTCAGG  
CACGAAAGCGTGGGGATCAAACAGGATTAGATACCCGCGTAGTCC

>Otu3947

CCAGCCTATGGGTTGCAGCAGTGGGGAATCTTGCAACAATGGGCGAAAGCCTGATGCAGCG  
ACGCCGCGTGGGTGAAGAAGGTCTTCGGATCGTAAAGCCCTTTTCTGCGTGACGAGACAA  
GGACGGTAGCGCAGGAAGAAGTCTCGGCTAACTACGTGCCAGCAGCCGCGGTAAAACGTA  
GGAGGCAAGCGTTATCCGGAGTTACTGGGCGTAAAGCGCGTGCGAGGTGGTGATACAAGTT  
CGGTGTGAAAGCGCCCGGCTCAACTGGGCGAGGACATCGAAGACTGTGTTACTCGAGGCG  
GGTAGAGGGGCGTAGAATTCCGGGTGTAGCGGTGAAATGTGTAGAGATCCGGAGGAATAC  
CAGTGGTGAAGACGGCGCCCTGGGCGGACCTGACACTGAAACGCGAAAGCGTGGGGAGC  
GAACGGGATTAGAGACCCGGGTAGTCC

>Otu3949

CCAGCCTATGGGGTGCTGCAGCCGAGAATATTGCAACAATGGGCGAAAGCCTGATCGAGCG  
ATACCGCGTGGTGATGAAGTGCTTCGGCACGTAAACATCTTTTATGAGGGAGGAAGTTA  
TTGACGTTACCTCGTGAATAAGGGGCTCCTAACTCTGTGCCAGCAGGAGCGGTAATACAG  
AGGCCCCGAGCGTTACCCGGAATTACTGGGCGCAAAGAGTGCGTAGGTGGTCATGTTAGT  
CGGCTGTAAATACCCGAGGCTCAACCTTGGAATCCGGTCGAAACGGCATGACTTGAGG  
GCGTGAGAGGTACATGGAACCTCTAGGTGTAGGGGTGAAATCCGTTGATATCTAGGGGAAC  
ACCGAAAGCGAAGGCAATGTACTGGCGCGTTCTTGACACTCAAGCACGAAAGCGTGGGTA  
GCGAACGGGATTAGATACCCGCGTAGTCC

>Otu3950

CCAGCCTACGGGGTGCTCCAGTGAGGAATATTGGTCAATGGACGCAAGTCTGAACCAGCC  
ATGCCGCGTGAAGGATGAAGGCCTTCTGGGTTGTAAACTTCTTTTATCTGGGGAGAAACC  
CCGACTTTTTTAGTTGGGTTGACGGTACCAGAGGAATAAGCACCGGCTAACTCCGTGCCAG  
CAGCCGCGGTAATACGGAGGGTGCAAGCGTTATCCGGATTTACTGGGTTTAAAGGGTGTTG  
TAGGCGGGTCAGTAAGTCAGTGGTGAAATCTCCGGGCTCAACCCGGAAACTGCCATTGAT  
ACTATTGGTCTTGAATACTGTTGAGGTGGGCGGAATATGTCATGTAGCGGTGAAATGCAT  
AGATATGACATAGAACACCGATTGCGAAGGCAGCTCACTAAGCAGCGATTGACGCTGAGG  
CACGAAAGCGTGGGGATCAAACAGGATTAGAAACCCGGGTAGTCC

>Otu3952

CCAGCCTATGGGTGGCTGCAGTAAGGAATATTGGTCAATGGACGGAAGTCTGAACCAGCC  
ATGCCGCGTGCAGGAAGACGGCCCTACGGGTTGTAAACTGCTTTTGCAGGGGAATAAACC  
TTTGGTCGTGACCAAAGTTGAATGTACTCTGAGAATAAGGATCGGCTAACTCCGTGCCAG  
CAGCCGCGGTAATACGGAGGATCCAAGCGTTATCCGGATTTATTGGGTTTAAAGGGTGCG  
TAGGTGGCCTGATAAGTCAGGGGTGAAAGACGGTAGCTTAACCTATCGCAGTGCCCTTGAT  
ACTGCCGGGCTTGAATGAACTAGAGGTAGGCGGAATGTGACAAGTAGCGGTGAAATGCAT  
AGATATGTACAGAACACCAATTGCGAAGGCAGCTTACTATGGTTAGATTGACACTGAGG  
CACGAAAGCGTGGGGATCAAACAGGATTAGAAACCCCTGTAGTCC

>Otu3954

CCAGCCTATGGGTGGCTCCAGTAACGAATATTGGGCAATGGGCGCAAGCCTGACCCAGCG  
ACGCCGCGTGTAGGATGAAGTCCTTCGGGATGTAAACTACTGTGAGGGTAATAAAGTCG  
TAAGATTGATATAACCCAAAGGAAGTCACGGCTAACTCTGTGCCAGCAGCCGCGGTAATA  
CAGAGGTGGCAAGCGTTGTTTCGGAATCACTGGGCTTAAAGCGTGTGTAGGCGGACCAGTA  
AGTGTCTTGTGAAATCCCTCGTCTCAACCGAGGAAGTGTGCGGCAAACTACTGGTCTTGA  
GGTAGGCATGGGTGCTTGGAACTCTTGGTGGAGCGGTGAAATGCGTAGATATCAAGAGGA  
ACGCTGTGGTGAAACGGAGCACTTGACCTATTCTGACGCTGAGACACGAAAGCGTGGG  
GAGCGAACGGGATTAGATACCCCTTGTAGTCC

>Otu3955

CCAGCCTACGGGGCGCTGCAGTAGGGAATTTTGCGCAATGGACGAAAGTCTGACGCAGCA  
ATACCGTGTGAGGGATGAAGCATTTCCGGTGTGTAAACCTCTGTGCTCGGTGAATAAAGGT  
GTTGGGAGTGGAAGCCAGCATTTGAATGTAGCCGAGAAGGAAGCACCGGCTAACTCTG  
TGCCAGCAGCCGCGGTAATACAGGGGGTGCAAGCGTTGTTTCGGAATCACTGGGCGTAAAG  
GGAGCGTAGGCGGATCCACAAGACAGAGGTTAAATGTTTCGGGCTCAACCTGAAATCTGCC  
TTCGTGACTGTGGATCTTGAGTATGGCAGAGGCTAGTGGAATTACCTGTGTAGCGGTGGA  
ATGCGTAGATATAGGTAAGAACACCAGAGGCGAAGGCGACTAGCTGGGCCAATACTGACG

CTGAGGCGCGAAAGCCGGGGGAGCAAACAGGATTAGATACCCCAGTAGTCC

>Otu3958

CCAGCCTATGGGTGGCTGCAGTCGAGGATTTTTCTCAATGGGGGAAACCCTGAAGGAGCG  
ACGCCGCGTGAGGGATGAAGGTCTTCGGATTGTAAACCTCTGTCATGCGGGATCAAAGCA  
TACGACCTAACACGTCGTATGTTGATAGTACTGCAAGAGGAAGCAGTGGCTAACTCTGTG  
CCAGCAGCCGCGGTAATACAGAGACTGCAAGCGTTGTTTCGGATTTCATTGGGCGTAAAGG  
TCCGCAGGTGGTCCAGCAAGTCGGATGTGAAATCCCATGGCCTAACCATGGAAAGTCATT  
CGAAACTGCTGGGCTAGAGGACTGGAGAGGAGACTGGAATAGTTGGTGTAGCAGTGAAAT  
GCGTAGATATCAACTAGAACACCAGTAGCGAAGGCGAGTCTCTGGACAGTTCCTGACACT  
CATGGACGAAAGCCAGGGGAGCAAACGGGATTAGAAACCCCAGTAGTCC

>Otu3959

CCAGCCTATGGGTGGCAGCAGTAGGGAATCTTCCACAATGGGCGAAAGCCTGATGGAGCG  
ACGCCGCGTAGAGGATGAAGGTCTTCGGATTGTAAACTTTTTTCGTTTGGGAACAAGTGT  
ATCTGCGTGAATAATGCAGGTATTTGATGGTACCAAAGGAAGAAGCTACGGCTAACTCTG  
TGCCAGCAGCCGCGGTAATACAGAGGTAGCGAACGTTGTCCGGATTTACTGGGCGTAAAG  
GGATCGTAGGTGGTTCATATAAGTCGGATGTGAAATCGTATTGCTTAACAATACCATTGCA  
TTTGATACTGTATGGCTTGAGTGCAGGATGGGTAAATGGAATTTCCGGTGTAGCGGTGAA  
ATGCGTAGATATCGGAAAGAACACCCGTGGCGAAGGCGGTTTACTGGCCTGCAACTGACA  
CTGAGGATCGAAAGCCAGGGGAGCAAACGGGATTAGATACCCCAGTAGTCC

>Otu3961

CCAGCCTACGGGGGGCTCCAGCAACGAATATTCCGCAATGGGCGCAAGCCTGACGGAGCG  
ATGCCGCGTGAAGGATGAAGCCCCTCGGGGTGTAAACTTCTGTCAGGGTTCACCAACACA  
ATGAGGAGACCCAGAGGAAGAGACGGCTAACTCTGTGCCAGCAGCCGCGGTAATACAGAG  
GTCTCGAGCGTTAATCGGAATCACTGGGCTTAAAGGGTGCCTAGGCGGAACGACAAGTGT  
TTTGTGAAAGCCCATGGCTCAACCATGGAATTGCTCGACATACTGTCTGTTCTTGAGGTCTG  
GTAGAGGTTGCCGGAACCTTAGGTGGAGCGGTGAAATGCGTAGATATCTAGAGGAACGCC  
AAAGGCGAAGGCAGGCAACTGGGCCGATTCTGACGCTGAGGCACGAAAGCGTGGGGAGCG  
AACGGGATTAGAAACCCTCGTAGTCC

>Otu3963

CCAGCCTATGGGTGCGCAGCAGTGGGGAATCTTGCGCAATGGGCGAAAGCCTGACGCAGCG  
ACGCCGCGTGGGTGAAGAAGGCCTTCGGGTGTAAAGCCCTGTTCGAGTGGGAAAAACAGC  
CGTGTCAATAATAAGGGCATGTTTTGATGGTACCCTAAAGGAAGCACCGGCTAACTCTG  
TGCCAGCAGCCGCGGTAATACAGAGGGTGAAGCGTTGTTTCGGAATTATTGGGCGTAAAG  
GGCAGGTAGGTGGTCTTAAAGTCTGCTGTGAAATCCCTGGGCTTAACCCAGGAAGTGC  
GCGGATACTCTAAGACTTGAGTTCCGGAGGGGTGCGTGGAATTCCGAGTGTAGCGGTGAA  
ATGCGTAGATATTCGGAGGAACACCAGAGGCGAAAGCGGCGCACTAGACGGCAACTGACA  
CTCAACTGCGAAAGCGTGGGGAGCAAACAGGATTAGATACCCGAGTAGTCC

>Otu3964

CAGCCTACGGGGGGCAGCAGTAACGAATCTTCCGCAATGCACGAAAGTGTGACGGAGCGA  
CGCCGCGTGTAGGAGAAGCCCTTCGGGTGTAAACTACTGTCAGGGGTGAGAAAGTTCTG  
ATCGACCCAGAGGAAGGCACGGCTAACTCTGTGCCAGCAGCCGCGGTAAGACAGAGGTG  
CCAAGCGTTAGGCGGAATCACTGGGCTTAAAGCGTGTGTAGGCGGATCGTTAAGTGTCTT  
GTGAAATCCCACGGCTCAACCGTGGAAGTCTTGACAGACTGGCGGTCTTGAGCCACCCA  
GGGCGAGCGGAACAGATGGTGGAGCGGTGAAATGCGTAGATATCATCTGGAACGCCAAA  
GGTGAAAACAGCTCGCTGGGGGTGTGCTGACGCTGAGACACGAAAGCCAGGGGAGCAAAT  
GGGATTAGATACCCGCGTAGTCC

>Otu3965

CCAGCTATGGGGTGCAGCAGGCGCGAAAACTCTCCAATGCACGAAAGTGTGAGAGGGGAA  
TCCCAAGTGCTTACACACTATGTGTAGGCTTTTTTCGATCGCAAAAAGATCGGAGAATAA  
GTGGTGGGCAAGACCGGTGCCAGCAGCCGCGGTAACCCCGCGCCACAAGTGGCAACCGT  
GTATTTGGCCTAAAGCGTCCGTAGCCGGCTCTGTGCATCCTTTGTGAAATTGTCCCGCT  
AACGGGGCAGCGTGCAGAGGACACGGCAGAACTTGGAAGTGGGAGGCGTGAGCGGTATTC  
CTGGGGGAACGGTAAACGTTATAATCCAGGAAGACCACCGATGGCGAAGGCAGCTCAC  
GAGAACAGCTTCGACGGTGAAGGACGAAAGCTAGGGGAGCAAACCGGATTAGAAACCCTC  
GTAGTCC

>Otu3967

CCAGCCTACGGGTGGCAGCAGTAAGGAATCTTCCACAATGGGGGCAACCCTGATGGAGCA  
ATACCGCGTGCAGGAAGACGCGTTTTCGGCGTGTAAACTGCTTTTGTACCGATGATTATG

ACAGTAGGTGAAGAATAAGGACCGGCTAATTACGTGCCAGCAGCCGCGGTAATACGTAAG  
GTCCAAGCGTTATCCGGAATTACTGGGCGTAAAGCGTCTGTAGGCGGCGCAGTAAGTTAG  
GTGCGAAATCTCGCGGCTCAACCGTGTAGACTGTGCTTAAACTACTGTGCTAGAGGTTG  
GTAGAGGCAAGTGGAACTTGCGGTGTAACAGTGACATGTGTAGATATCGCAAAGAACACC  
AATGGCGAAGGCAGCTTGCTGGGCCACACCTGACGCTCAGAGACGAAAGCGTGGGGAGCG  
AACGGGATTAGAAACCCGTGTAGTCC

>Otu3968

CCAGCCTACGGGGGGCACCAGTGGGGAATCTTGCGCAATGGGCGAAAGCCTGACGCAGCC  
ATGCCGCGTGAGTGAAGAAGGTCTTAGGATTGTAAAGCTCTTTCGCCCCTGACGATGATG  
ACGGTAACGGGAGAAGAAGCCCCGGCTAACTTCGTGCCAGCAGCCGCGGTAATACGAAGG  
GGGCTAGCGTTGTTTCGGAATTACTGGGCGTAAAGCGCGCGTAGGCGGTTTTGCAAGCCAG  
AGGTGAAATGCCTGAGCTCAACTCAGGAATGGCCTTTGGGACTGCGAGGCTTTGAGGACT  
GGAGAGGTGAGTGGAAATTTCCAGTGTAGAGGTGAAATTCGTAGATATTGGGAAGAACACC  
GGTGGCGAAGGCGGCTCACTGGCCAGTTTCTGACGCTGTAGCGCGAAAGCGTGGGGATCA  
AACAGGATTAGAGACCCGAGTAGTCC

>Otu3969

CCAGCCTATGGGGGGCAGCAGTAACGAATCTTCCCCAATGCACGCAAGTGTGAGGGAGCG  
ACGCCGCGTGAGGATGAAGTCCTTCGGGATGTAACTCCTGTCAGAGGTTAGAAAGTTC  
TGATCAACCTCAGAGGAAGGCACGGCTAACTCTGTGCCAGCAGCCGCGGTAAGACAGAGG  
TGCCAAGCGTTAGGCGGAATCACTGGGCTTAAAGCGTGTGTAGGCGGACTTGTAAAGTGCC  
TTGTGAAATCCCAAGGCTCAACCTTGGAATTGCTTGGCATACTGCGAGTCTTGAGCTGCT  
TAGGGGTTGCCGGAACAAACGGTGGAGCGGTGAAATGCATAGATATCGTTTGGAGCGCCA  
AAGGTGAAAACAGGCAACTGGGAGCATGCTGACGCTGAGACACGAAAGCCAGGGGAGCAA  
ACGGGATTAGAGACCCGTGTAGTCC

>Otu3970

CCAGCCTACGGGGGGCTGCAGTCGAGGATCTTCGGCAATGGGCGAAAGCCTGACCGAGCG  
ACGCCGCGTGCGGGATGAAGGCCTTCGGGTTGTAAACCGCTGTCAGTGGGGAGGAAGTGT  
GGGAGGGTTCTCCCTCTCATTTGACCTATCCGCAGAGGAAGTACGGGCTAAGTTTCGTGCC  
AGCAGCCGCGGCAAGACGAACCGTACGAACGTTATTCGGAATCACTGGGCTTAAAGGGTG  
CGTAGGCTGTCCGTAAGTTGGGTGTGAAATCCCTCGGCTTAACCGAGGAATTGCGCCCA  
AACTGCCGGACTTGAGGGAGACAGAGGTGAGCGGAACCTAGGGTGGAGCGGTGAAATGC  
GTTGATATCCTAAGGAACACCAGGGGCGAAAGCGGCTCACTGGGTCTCTTCTGACGCTGA  
GGCACGAAAGCTAGGGGAGCGAACGGGATTAGAGACCCCTGTAGTCC

>Otu3975

CCAGCCTATGGGGGGCTCCAGTAAGGAATATTGGTCAATGGACGCAAGTCTGAACCAGCC  
ATGCCGCGTGAAGGATGACAGCCCTATGGGTTGTAAACTTCTTTTATACAGGAAAAAACC  
CCCGGACGTGTTCCGGGCTGATGGTACTGTAAGAATAAGGATCGGCTAACTCCGTGCCAG  
CAGCCGCGGTAATACGGAGGATCCAAGCGTTATCCGGATTTATTGGGTTTAAAGGGTGCG  
TAGGCGGATTGGTAAGTCAGTGGTGAAATCCTACAGCTTAACTGTAGAACTGCCATTGAT  
ACTATTAGTCTTGAGTACAATTGAAGTGGGCGGAATGTGTCATGTAGCGGTGAAATGCAT  
AGAGATGACACAGAACACCGATAGCGAAGGCAGCTCACTAACTGTAAGTACGCTGAGG  
CACGAAAGCGTGGGGATCAAACAGGATTAGAGACCCCTGTAGTCC

>Otu3976

CCAGCCTATGGGGGGCACCAGTGGGGAATATTGGACAATGGGGGCAACCCTGATCCAGCC  
ATGCCGCGTGGGTGAAGAAGGCCTTCGGGTTGTAAAGCCCTTTCAGGTGGGACGATGATG  
ACGGTACCACCAGAAGAAGCTCCGGCTAACTTCGTGCCAGCAGCCGCGGTAATACGAAGG  
GAGCTAGCGTTGTTTCGGAATTACTGGGCGTAAGCGCGCGTAGGCGGTTTGTATTAGTCAGA  
GGTGAATCCCGGGGCTCAACCTCGGAATTGCCTTTGATACTGGCAAGCTAGAGTTCCGA  
AGAGGATAGTGAATACCCAGTGTAGAGGTGAAATTCGTAGATATTGGGTGGAACACCGA  
TGGCGAAGGCAGCTATCTGGTCCGATACTGACGCTGAGGTGCGAAAGCGTGGGGAGCAAA  
CAGGATTAGATACCCGCGTAGTCC

>Otu3980

CCAGCCTACGGGAGGCAGCAGTGAGGAATATTGGACAATGGTGGCAACACTGATCCAGCC  
ATGCCGCGTGAAGGATGACTGCCCTATGGGTTGTAAACTTCTTTTGTGTTGGGGACGAAAAA  
GGGCTACGTGTAGCCCCCTGACGGTACCCAACGAATAAGCATCGGCTAACTCCGTGCCAG  
CAGCCGCGGTAATACGGAGGATGCAAGCGTTATCCGGATTTATTGGGTTTAAAGGGTGCG  
TAGGCGGGCCATAAGTCAGTGGTGAAATCCTGTAGCTTAACTACAGCACTGCCATTGAT  
ACTGTGGGTCTTGAGTACAGTTGAGGTAGGCGGAATGTACAGTGTAGCGGTGAAATGCTT

AGATATTGTACAGAACACCGATTGCGTAGGCAGCTTACTAAACTGTAACTGACGCTGAGG  
CACGAAAGCATGGGGAGCAAACAGGATTAGATACCCCAGTAGTCC  
>Otu3982  
CCAGCCTATGGGGTGCAGCAGCTAAGAATCTTCCGCAATGGGCGAAAGCCTGACGGAGCG  
ATGCCGCGTGATCGATGAAGGTCGAGAGATTGTAAAGATCTTTTCCGCATGAGGAATAAA  
GCCAGGAGGGAATGCCTGGCAGATGACGTTAGTGCGGGAATAAGCCCCGGCTAATTACGT  
GCCAGCAGCCGCGGTAACACGTAAGGGGCGAGCGTTGTTTCGGAATTATTGGGCGTAAAGG  
GCACGCAGGCGGTTATGCAAGTCCGATGTGAAATCTCCGGGCTCAACTCGGGAAACGCGT  
TGGAACTGCATGACTAGAGTATTAGAGGGGGAGTCGGAATTCCTAGTGTAGGGGTGAAA  
TCTGTTGATATTAGGAAGAACACCGGTGGCGAAGGCGGACTCCTGGCTGGATACTGACGC  
TGAGGTGCGAAAGCATAGGGAGCAAACAGGATTAGATACCCCCGTTAGTCC  
>Otu3983  
CCAGCCTACGGGAGGCAGCAGTAGGGAATATTGGACAATGGACGCAAGTCTGATCCAGCC  
ACCCGCGTGAAAGGATTAAGGCCCTATGGGTTGTAAACTTCTTTTCTTTGGGAATAAAAA  
GCGGTATTTCATATCGCCTTGAAGGTACCAGGGGAATAAGCACCGGCTAACTCCGTGCCAG  
CAGCCGCGGTAATACGGAGGGTGCAAGCGTTATCCGGATTCACTGGGTTTAAAGGGTGCG  
TAGGTGGTCTGCTAAGTCAGCGGTGAAAGCCCGGAGCTTAACTCCGGAATTGCCATTGAT  
ACTGACGGACTTGAATCAAGTTGAGGTGGATGGAATATTACATGTAGCGGTGAAATGCTT  
AGATATGTAATAGAACACCGATTGCGAAGGCAGCTGACGAACTGTAACTGACGCTGAGG  
CACGAAAGCGTGGGGATCAAACAGGATTAGAAACCCCAGTAGTCC  
>Otu3984  
CCAGCCTACGGGGTGCTGCAGTGGGGAATATTGGACAATGGGCGGAAGCCTGATCCAGCG  
ATACCGCGTGTTGAAGAAGGCCCTGAGGGTTGTAAAGCACTTTCAATGGGAAGGAACACC  
TATCGGCGAATACCCGGTAGACTGACATTACCCATACAAGAAGCACCGGCTAACTCCGTG  
CCAGCAGCCGCGGTAATACGGAGGGTGCAAGCGTTAATCGGAATTACTGGGCGTAAAGCG  
TGCGTAGGCGGTGATCTAAGTCAGATGTGAAAGCCCTGGGCTTAACCTGGGAACTGCATT  
TGATACTGGGTCACCTCGAGTTGAGTAGAGGAGAGTGGAATTTTCAGGTGTAGCGGTGAAAT  
GCGTAGAGATCCGAAGGAACACCAGTGGCGAAGGCGGCTCTCTGGACTCAAACCTGACGCT  
GAGGTACGAAAGCGTGGGTAGCAAACAGGATTAGAGACCCGTGTAGTCC  
>Otu3991  
CCAGCCTACGGGTTGCTGCAGTCGAGAATCTTCCGCAATGGACGAAAGTCTGACGGAGCG  
ACGCCGCGTGATTGATGAAGCTCTTCCGAGTGTAAGATCTTTTATGAGGGAAGAAGTTT  
ATTGACGGTACCTCATGAATAAGGGGCTCCTAATCTCGTGCCAGCAGGAGCGGTAATACG  
AGAGCCCCGAGCGTTATCCGGAATTATTGGGCGTAAAGGGTGCGTAGGTGGTAGTGTTAG  
TCGTTTGTCAAATCCTCGGGCTTAACCCGAGAAGTGCGAACGAAACGGCACAACTAGAGA  
GTGTGAGAGGTATAGGGAAGTCAATGGTGTAGGGGTGAAATCCGTTGATATCATGGGGAAC  
ACCAAAGCGAAGGCACTATACTAGCACATATCTGACACTCAAGCACGAAAGCGTGGGTA  
GCGAATGGGATTAGATACCCTGGTAGTCC  
>Otu3992  
CCAGCCTACGGGTGGCACCAGTAAGGAATATTGGACAATGGTCGCAAGACTGATCCAGCC  
ATGCCGCGTGAAAGGATGAAGGCCCTATGGGTTGTAAACTTCTTTTGTACGAGAAAAAAC  
TCTTTACGTGTAAAGAGCTGATTGTATCGTAAGAATAAGGATCGGCTAACTCCGTGCCAG  
CAGCCGCGGTAATACGGAGGATCCAAGCGTTATCCGGATTTATTGGGTTTAAAGGGTGCG  
TAGGCGGAATGATAAGTCAGTGGTGAAAGCCTGCAGCTTAACTGTAGAATTGCCGTTGAT  
ACTGTCGTTCTTGAGTATATTTGATGTGGGCGGAATGTGTCATGTAGCGGTGAAATGCTT  
AGATATGACACAGAACACCGATTGCGAAGGCAGCTCACAAAACCTATAACTGACGCTGAGG  
CACGAAAGCGTGGGGATCAAACAGGATTAGAAACCCGTGTAGTCC  
>Otu3994  
CCAGCCTACGGGTGGCAGCAGTGGGGAATCTTGCAATGGGGGAAACCCTGATGCAGCG  
ACGCCGCGTGAGCGATGAAGCCCTTCGGGGTGTAAGCTCTTTCGTCAGGGAAGATAGTG  
ACGGTACCTGGAGAAGCAGCTGCGGCTAACTACGTGCCAGCAGCCGCGGTAATACGTAGG  
CAGCAAGCGTTGTTTCGAGTTACTGGGCGTAAAGAGTGGGTAGGCGGTGCTCTAAGTTTG  
GTGTGAAATCTCCCGGCTCAACTGGGAGGGTGCGCCGAAGACTGGAGTGCTTGAGTATGG  
GAGAGGAAAGCGGAATTCCTGGTGTAGCGGTGAAATGCGTAGATATCAGGAGGAACACCT  
GCGGTGAAGGCGGCTTTCTGGACCATTACTGACGCTGAGACACGAAAGCGTGGGTAGCAA  
ACAGGATTAGAGACCCCTCGTAGTCC  
>Otu4000  
CCAGCCTACGGGTGGCAGCAGGTAGGTATTTTTTGCAATGCACGAAAGTGTGACAGAGCG

AGCCAGAGTGTTTTTCCATTTGGAAAACTTTTGCCAGCTGTAAATAGGCTGGCGAATAA  
GGACTGGGCAAGACCGGTGCCAGCCGCCGCGTAATCCCGGCGGTCCAAGTCGCAGCCAA  
CTTTATTGGGTCTAAAACATCCGTAGCTTGTATGAAAGTCTTTTGTGAAACTCTGTCTC  
TTAAGGGCAGAAATGGCAATAGATACTACATGACTAGAGACCGGTGGACGTAAGGAGTAC  
ATTTGAGGTAGTGGTAAAATACGTTAATCTTAAATGGACTAACAACAGCGAAGGCACCTT  
ACGATGACGGTCTGACAGTGAGGGATGAAGGCTAGGGGCGCAAAATGGATTAGAAACCC  
CTGTAGTCC

>Otu4001

CCAGCCTATGGGTGGCTCCAGTCGAGAATCTTCCGCAATGGACGAAAGTCTGACGGAGCG  
ACGCCGCGTGGAGGATGAAGTGCTTCGGCATGTAAACTCCTTCTGCCAGGGAAAAAGTTT  
ATTGATTGTACCTGGAGAATAAGAGGTTGCTAAACTCGTGCCAGCAGCAGCGGTAATACG  
AGTGCCTCGAGCGTTATCCGGAATCATTGGGCGTAAAGGGTGCCTAGGCGGCGATGTTAG  
TCTCCCGTAAAAATTCCTTGGCTTAACCAAGGGCGCGCGGGAGAAACGGCATTGCTTGAGA  
GCGGAAGGGGCTCTGGAATCATGGTGTAGCGGTGAAATGCGTTGATATCATGGGGAAC  
ACCAAAAGCGAAGGCAGGAGGCTGGTCCGTTTCTGACGCTGAAGCACGAAAGCGTGGGTG  
GCGAATGGGATTAGAAACCCCGGTAGTCC

>Otu4005

CCAGCCTACGGGGGGCTCCAGTGGGGAATATTTCCGCAATGGGCGAAAGCCTGACGGAGCG  
ACGCCGCGTGGATGATGAAGGTCTTCGGATTGTAAAGTCTGTAGAGGGGAAGAAGGGT  
GTAGTAATACATTTGACAGTACTCCTAAAGTAAGCTGCGGCAAACTCTGTGCCAGCAGCC  
GCGGTAATACAGAGGTAGCAAGCGTTGTTCCGGAATGACTGGGTGTAAAGCGCATGTAGAT  
GGTTTTGTAAAGTTGAATGTGAAATCCCTTGGCTCAACCAAGGAACGGCATTCAATACTGC  
TTAACTTGAGTGCAGGAGAGGAAAGTGGAATTTCTGGTGTAGCGGTGAAATGCGTAGATA  
TCAGAAGGAACACCGGTGGCGAAGGCGACTTTCTGGCCTGTAAGTACATTGAGATGCGA  
AAGCTAGGGGAGCAAACAGGATTAGATACCCGCGTAGTCC

>Otu4008

CCAGCCTATGGGGGGCTCCAGTGAGGAATTTTGCGCAATGGGGGAAACCCTGACGCAGCG  
ACGCCGCGTGGAGGATGAAGGCCTTCGGGTGCTAAACTCCTGTCAGAGGTGAAGAATGCC  
CGCAAGGGTTTGACGGTAACCTCAAAGGAAGCCCCGGCTAACTACGTGCCAGCAGCCGCG  
GTAATACGTAGGGGGCAAACGTTGCTCGGAATTACTGGGCGTAAAGGGTGTGTAGGCGGC  
TGGGCAAGTCAAAGATGAAATCCCAGAGGCTTAACCTTCGGAAGTGTCTTTGAAACTGCCTA  
GCTTGAGGATAGTTGATGAAAAGGGAATTTCCGGTGGAGCGGTGAAATGCGTAGATATCG  
GGAGGAACACCTGAGGCGAAGGCGCTTTTCAAAGTACTCCTGACGCTGAAACACGAAAG  
CTAGGGGAGCAAACGGGATTAGAGACCCGCGTAGTCC

>Otu4009

CCAGCCTATGGGAGGCACCAAGTCGAGAATCTTGGTCAATGGGCGAAGGCCTGAACCAGCG  
ATGCCGCGAGCGTGAAGAAGGCCTCTGGTTGTAAAACGCATATGCACGAGTGCAGAATGAG  
GTGCTCGTGCGGAATAGTCCTGTGCAATCTCGGTGCCAGCACACGCGGTCAGACCGAAAG  
GGCAAGGCATATCTTATTGAAATGGGCGTAAAAGGTCATTAGGCTGGCTTGAAGAAGGCT  
ACTTGAAAGAAAAGAGGCATAACCTTGAGTGAGGGTAGTCGATTCTGAGCCTTGAGTATCG  
TGGGGGGTTATAGAATGCTCGACGGACCGATGGAATGGGTTGATGTGAGTGGAACATCG  
GTGGCGAAGGCGATAACCTGGACGATAACTGACGCTGACTGACTAAGGTGTGGAGATCAA  
AGTGATTAGATACCCTAGTAGTCC

>Otu4010

CCAGCCTACGGGAGGCAGCAGTCGAGAATCATTCGCAATGGGCGAAGGCCTGACGATGCG  
ACGCCGCTGTGAGCGATGAAGGCCTTAGGGTCGTAAAGCTCTTTCGCTTGGAACAAGAGA  
GGCTGGCTAACATCCAGCTAATTTGAGGGTACCAGGTAAAGAAGCACCGGCTAACTCCGT  
GCCAGCAGCTGCGGTAATACGGAGGGTGCAAGCATTAAATCGGATTTATTGGGCGTAAAGG  
GCGCGTAGGCTGAAGAGAAAGTCTTGTGTGAAATCCCGGGGCTCAACCCCGGAACAGCAC  
GGGAAACTCCTTTTCTAGAGGGTAGGCGGAGAAAACGGAATTCACAAAGTAGCGGTGAAA  
TGCGTAGATATGTGGAAGAACACCGGTGGCGAAGGCGGTTTTCTAGCTTACTCCTGACGC  
TGAGGCGCGAAAGCAAGGGGATCAAACAGGATTAGATACCCAGTAGTCC

>Otu4011

CCAGCCTACGGGGCGCAGCAGTGAGGAATATTGGTCAATGGACGCAAGTCTGAACCAGCC  
ATGCCGCGTGAAGGATGAATGCCCTACGGGTGTGAAACTTCTTTTGTACGAGGCGAATCT  
CTTCTACGTGTAGAGGACTGACAGTATCGTACGAATAAGCATCGGCTAACTCCGTGCCAG  
CAGCCGCGGTAATACGGAGGATGCAAGCGTTATCCGGATTTATTGGGTTTAAAGGGTGC  
TAGGTGGGATTATAAGTCAGAGGTGAAATATTGCAGCTTAAGTGTGTAAGATTGCCTTTGAT

GCTGTAGTTCTTGAGTTCAGTTGAGGTGGGCGGAATGTGTAATGTAGCGGTGAAATGCTT  
AGATATTACACAGAACACCGATTGCGTAGGCAGCTCACTAACTGACACTGACACTGAGG  
CACGAAAGCGTGGGGATCAAACAGGATTAGATACCCCGGTAGTCC

>Otu4013

CCAGCCTATGGGGTGCAGCAGTAAGGAATATTGGTCAATGGAGGCAACTCTGAACCAGCC  
ATGCCGCGTGAAGGATGAAGGCGCTATGCGTCGTAAACTCTTTTATATGGGAAAAAACC  
TCTGAACGTGTTCCGAGCTGATGGTACCATAAGAATAAGGATCGGCTAACTCCGTGCCAG  
CAGCCGCGGTGATACGGAGGATCCAAGCGTTATCCGGATTCATTGGGTTTAAAGGGTGCG  
TAGGCGGCTTGTTAAGTCAGCGGTGAAATCTCAGGGCTTAACCCTGAAACTGCCATTGAT  
ACTGACGAGCTTGAGTACACTTGAAGTGGGCGGAATGTGTCGTGTAGCGGTGAAATGCTT  
AGATATGACACAGAACACCGATTGCGAAGGCAGCTCACTAAATTGTCACTGACGCTGAGG  
CACGAAAGCGTGGGGATCAAACAGGATTAGAGACCCGCGTAGTCA

>Otu4015

CCAGCCTATGGGTTGCAGCAGTCGAGGATCTTCGGCAATGGGCGCAAGCCTGACCGAGCG  
ACGCCGCGTGCGGGATGAAGGCCTTCGGGTGTAAACCGCTGTCAGAGGGGAGGAAATTC  
CGGTGGGTACTCCCATCGGTTTGACCTATCTTCAGAGGAAGTACGGGCTAAGTTTCGTGCC  
AGCAGCCGCGGTAAGACGAACCGTACAAACGTTATTTCGGAATCACTGGGCTTTAAGGGTG  
CGTAGGCGGCCCCGAAAGTTGGGTGTGAAAGCCCTCGGCTCAACCGAGGAAGTGCGCCCA  
AACTACCGGGCTCGAGGAAGATAGAGGTGAGCGGAACCTAGGGTGGAGCGGTGAGATGC  
GTTGATATCCTAAGGAACACCAGTAGCGAAAGCGGCTCACTGGGTCTTTTCTGACGCTGA  
GGCACGAAAGCTAGGGGAGCGAAGAGGATTAGAAACCCCTCGTAGTCC

>Otu4017

CCAGCCTATGGGGCGCTGCAGCAACGAATCTTCCCCAATGGCCGAAAGGCTGAGGGAGCG  
ACGCCGCGTGTGGGACGAAGTACTTCGGTATGTAAACCACTGTTAGGGTTACGAAAGCAA  
TGCGCGCTAACATCGCGCAAAGTTGATCTAATCCAGAGAAAGGGACGGCTAACTCTGTGC  
CAGCAGCCGCGGTAATACAGAGGTCCCGAGCGTTACTGAGATTCACTGGGTTTAAAGGGT  
GCGTAGGTGGTCCGTTAAGTCAGTTGTGAAATCCCCGGGCTCAACCCGGGAAGTCTTCT  
GATACTGGCGGACTTGAGGCCTGTAGGGGTTACTAGAACAGACGGTGGAGCGGTGAAATG  
CGTAGATATCGTCTGGAATGCCTGTGGTGAAGACGGGTAACTGGGCAGGTTCTGACACTG  
AGGCGCGAAAGCGTGGGGAGCGAACGGGATTAGAAACCCGTGTAGTCC

>Otu4018

CCAGCCTATGGGTTGCTGCAGTCTAGAGGCTTCGGCAATGGGGGAAACCCCTGACCGAGCG  
ACGCCGCGTGCGGGATTGAAGGCCTTCGGGTGCTAAACCGCTGTCAGGTGGGAAGAATGC  
CCGTATGGCGAATACGGGAGCGACGGTACCACCAGAGGAAGCCCCGGCTAACTCCGTGCC  
AGCAGCCGCGGTAATACGGAGGGGGCAAGCGTTATTTCGGATTTACTGGGCGTAAAGGGTG  
CGTAGGCGGCCGCGCAAGTCTGACGTGAAATCTTCACCGCTCAACGGGAAGAGGTGCTTG  
GAAACTGCGTGGCTCGAGTGTGGTAGAGGCAAGCGGAATTCAGGTGTAGCGGTGGAATG  
TGTAGATATCTGGAAGAACACCCGTGGCGAAGGCGGCTTGCTGGGCCATCACTGACGCTG  
AGGCACGAAAGCGTGGGGAGCAAACGGGATTAGATACCCCGTAGTCC

>Otu4021

CCAGCCTATGGGGTGCACCAGTGGGGAATTTTCCGCAATGGGCGAAAGCCTGACGGAGCA  
ATACCGCGTGAGGGAGGAAGGCTCTTGGGTGTAAACCTCTTTTCTCAGGGAAGAAAGAT  
GACGGTACCTGAGGAATAAGCATCGGCTAACTCCGTGCCAGCAGCCGCGGTAATACGGAG  
GATGCAAGCGTTATCCGGAATGATTGGGCGTAAAGGGTCCGCAGGTGGCATTGAAAGTCT  
GCTGTTAAAGAGTCTGGCTCAACCAGATAAAGGCAGTGGAAGCTACAAAGCTAGAGTGCG  
TTCGGGGTAGAGGGAATTCCTGGTGTAGCGGTGAAATGCGTAGAGATCAGGAAGAACACC  
GGTGGCGAAGGCGCTCTACTAGGCCGCAACTGACACTGAGGGACGAAAGCTAGGGGAGCG  
AATGGGATTAGAAACCCCTGTAGTCC

>Otu4022

CCAGCCTATGGGGGGCACCAGTGAGGAATATTGCCCAATGGACGAAAGTCTGAGGCAGCG  
ACGCCGCGTGGGTGATGAAGGCCTTCGGGTGCTAAAGCCCTTTTCTGCGTGACGAGACAA  
AGGACGGTAGCGCGGGAAAAAGTCTCGGCTAACTACGTGCCAGCAGCCGCGGTAAACGT  
AGGAGGCAAGCGTTATCCGGAGTTACTGGGCGTAAAGAGTGCGTAGGCGGATTGATAAGT  
GGGTGGTGAAAGCGCCCGGCTAAACCGGGCGAGGTCCATTCACTGTCACTGTAGAGGC  
GGATAGAGGGGTGCGGAATTCGGGTGTAGCGGTGAAATGTGTAGAGATCCGGAGGAACA  
CCAGTGGTGCAAACGGCGCCCTGGGTCCGAACTGACGCTGAAGCACGAAAGCGTGGGGAG  
CGAACGGGATTAGAAACCCCTAGTAGTCC

>Otu4025

CCAGCCTACGGGGGGCTGCAGTCGAGAATTTTTCTCAATGGGCGAAAGCTTGAAGGAGCG  
ACGCCGCGTGGGGGATGAAGGGCTTCGGCTGTAAACCCCTGTCATTTGCGAACAAACCT  
GCTTATTGAATAGATGAGCAGCTGATTGTAGCGAAAGAGGAAGGGACGGCTAACTCTGTG  
CCAGCAGCCGCGTAATACAGAGGTCCCAAGCGTTGTTTCGATTCACTGGGCGTAAAGGG  
TGCGTAGGTGGCGGAATAAGTTTGATGTGAAATCTCCGGGCTTAACCCGAAATGCATT  
GAATACTATTTTGCTCGAGGGTCGGAGGGGGGACTGGAATTCCTGGTGTAGCAGTGAAT  
GCGTAGATATCGAGAGGAACACCAGTGGCGAAAGCGAGTCCCTGGACGACTCCTGACACT  
GAGGCACGAAAGCTAGGGGATCAAACAGGATTAGAAACCCCGGTAGTCC

>Otu4027

CCAGCCTATGGGGGGCTCCAGTGGGGAATATTGGGCAATGGGCGAAACGCTGACCCAGCC  
ATGCCGCGTGCCGGAAGAAGGTCCATTGGACTGTAAACGGCTTTTCTTTGGGGCTAACGT  
ATGATTAGATCATACTTGAAAAGTACTAAGGGAATAAGCACGGGCTAACTACGTGCCAGCA  
GCCGCGGTAATACGTAGGGTGCAAGCGTTGTCCGGATTTACTGGGTTTAAAGGGTGCCTA  
GGCGGCGCGATAAGTCTGGGATGAAATGGCTAGGCTCAACCTAGTCGCTGTCCTGGATAC  
TGTCATGCTTGAGATCGGTTGAGGTTACTGGAATGAGTGGTGTAGCGGTGAAATGCGTAG  
AGATCACTCAGAACACCAATTGCGAAGGCAGGTAAGTGGGCCGTATCTGACGCTGAGGCA  
CGAAAGCGTGGGGATCAAACAGGATTAGAAACCCCGGTAGTCC

>Otu4028

CCAGCCTACGGGAGGCAGCAGCTAAGAATCTTCCGCAATGGGCGAAAGCCTGACGGAGCG  
ATGCCGCGTGATCGATGAAGGTCGAGAGATTGTAAAGATCTTTTCCACATGAGGAATAAG  
TCTGGGAGGGAATGCCTGGATGATGACGTTAGTGTGGGAATAAGCCCCGGCTAATTACGT  
GCCAGCAGCCGCGTAACACGTAAGGGGCGAGCGTTGTTTCGGAATTATTGGGCGTAAAGG  
GCACGCAGGCGGTTTTGCAAGTCTGATGTGAAAGACCTGGGCTTAACTCAGGGGCCGCT  
TGGAAGTGCAGACTAGAGTATTAGAGGGGGAGTCGGAATTCCTAGTGTAGGGGTGAAA  
TCTGTTGATATTAGGAAGAACACCGGTGGCGAAGGCGGACTCCTGGCTGGATACTGACGC  
TGAGGTGCGAAAGCATAGGGAGCAAACAGGATTAGAAACCCGAGTAGTCC

>Otu4031

CCAGCCTATGGGGGGCTGCAGTAGGGAATTTTGCGCAATGGGCGAAAGCCTGACGCAGCA  
ACGCCGCGTGAAAGGATGAAGGTCTTCGGATTGTAAACTTCTGTTGGATGGGAAAAAATC  
CTAGCAATAGGACTGATGGTACCATTTCGAGTAAGCACCGGCTAACTACGTGCCAGCAGCC  
GCGTAATACGTAGGGTGCAAGCGTTGTTTCGGAATCACTGGGCGTAAAGGGAGCGTAGGC  
GGGTTTGTAAGTTAGGAGTTTAAACCTTGGGCTTAACCCAAGATCTGCTCTTAATACTGC  
GATTCTTGAATATTGGAGAGGGTGATGGAATTCAGGTGTAGCGGTGGAATGCGTAGATA  
TCTGGAAGAACACCAGTAGCGAAGGCGGTCACCTGGCCAAATATTGACGCTGAGGCTCGA  
AAGCTAGGGGAGCAAACAGGATTAGATACCCCAGTAGTCC

>Otu4032

CCAGCCTACGGGATGCAGCAGTGGGGAATATTGGGCAATGGGCGAAAGCCTGACCCAGCG  
ACGCCGCGTGAGGCGATGAAGGCCTTCGGGTTGTAAAGCCCTGTTGGGTGGAAAGAAGGGT  
CCATCGACGAATAGTCTTTGGATCTTGACGGTACCACCAGAGGAAGCACCGGCTAACTCC  
GTGCCAGCAGCCGCGTAATACGGAGGGTGCAAGCGTTGTTTCGGAATTACTGGGCGTAAA  
GGGCGCGTAGGTGGTTGTGTAAGTCGGATGTGAAATCCCCAGGCTCAACTTGGGAACCGC  
ATCTGATACTGCATGACTAGAGTACAGCAGAGGGAAACGGAATTCCTGGTGTAGAGGTGA  
AATTCGTAGATATCAGGAGGAACACCGGTGGCGAAGGCGGTTTTCTGGGCTGATACTGAC  
ACTGAGGCGCGAAAGCGTGGGTAGCAAACAGGATTAGAAACCCTAGTAGTCC

>Otu4033

CCAGCCTATGGGTGGCAGCAGTAGGGAATATTGGTAATGTGCGAAAGCGCGAACCAGCAA  
CGCCGCGTGACGATGAAGGTCTTCGGATTGTAAACTTCTTTTAGAGGGAACGAATAAAT  
TGACGGTACTCTCAGAAAAAGCCACGGCTAACTACGTGCCAGCAGCCGCGTAATACGTA  
GGTGGCAAGCGTTACTCGGATTTACTAGGCGTAAAGCGTGTGTAGGTGGTTGGATAAGTC  
TGTGGTGAAATCTCTCGGCTCAACCGGGAGGGGTTACAGAACTATCCGGCTTGAGTGT  
GGTAGGGGAAGACGGAATTCCTGGTGTAGCGGTGAAATGCGTAGATATCAGGAGGAACAC  
CGATGGCGAAAGCGGTCTTCTGGGCCAATACTGACACTGAAACACGAAAGCTAGGGGAGC  
AAACAGGATTAGAAACCCCTGTAGTCC

>Otu4037

CCAGCCTACGGGTGGCTGCAGTCGAGGATCTTCGGCAATGGGCGAAAGCCTGACCGAGCG  
ACGCCGCGTGCGGGATGAAGGCCTTCGGGTTGTAAACCGCCGTCGTAGAGGAGGAAATGC  
AGGTGGGTTCTCCCATCTGTTTGACCTATTCTAAGAGGAAGGACGGGCTAAGTTTCGTGCC  
AGCAGCCGCGGTAAGACGAACCGTCCAAACGTTATTTCGGAATCACTGGGCTTAAAGGGTG



CGTAGGCGGCTCAGAAAGTAGGGTGTGAAAAGCCCTCGGCTTAACCGAGGAATTGCGCCCT  
AAACTACTGGGCTTGAGGGACGCAGAGGTAAGCGGAACCTTAGGGTGGAGCGGTGAAATGC  
GTTGATATCCTAAGGAACACCAGGAGCGAAAGCGGCTTACTGGGCGTTTTCTGACGCTGA  
TGCACGAAAGCTAGGGGAGCGAACGGGATTAGAGACCCGTGTAGTCC

>Otu4038

CCAGCCTACGGGGTGCAGCAGTCGAGGATCTTCGGCAATGGGCGCAAGCCTGACCGAGCG  
ACGCCGCGTGTGCGATGAAGGCCTTCGGGTGTAAAGCACTGTCGAGGGGGAGAAAGCCG  
AAAGGTTGATCTATCCCTGGAGGAAGCACGGGCTAAGTTCGTGCCAGCAGCCGCGGTAAG  
ACGAACCGTGCGAACGTTGTTTCGGAATCACTGGGCTTAAAGGGCGCGTAGGCGGGCTGCC  
AAGTCTGGGGTGAAATCCCACGGCTCAACCGTGGAACTGCCTCGGATACTGGCGGTCTCG  
AGGGAGGTAGGGGCATGCGGAACTGTGGGTGGAGCGGTGAAATGCGTTGATATCCACAGG  
AACTCCGGTGGCGAAAGCGGCGTGCTGGACCTTTTTCTGACGCTGAGGCGCGAAAGCTAGG  
GGAGCAAACGGGATTAGAAACCCTTGTAGTCC

>Otu4044

CCAGCCTATGGGGCGCTGCAGTAGGGAATATTGGGCAATGGGCGGAAGCCTGACCCAGCC  
ACGCCGCGTGGGGGAAGAAGGCCACCGGGTTGTAAACCCCTTTGGCCAGGGAATAACTA  
CCCGCACGGCGGGGGATGAAGGTACCTGGAGAACAAGCGCCGGCAAACCTACGTGCCAGCA  
GCCGCGGTAATACGTAGGGCGCGAGCGTTGTCCGGATTTACTGGGTTTAAAGGGTGCGCA  
GGCGGGACCTTAAGTCGGCGGTGAAATGCGGGGGCTCAACCCCCGCGCCGTTGCCGATAC  
TGGGGATCTTGAGTGCGCCCGGGGCGGCCGAACGGGCGGTGTAGCGGTGAAATGCGTAG  
AGATCGCTCAGAACGCCGATAGCGAAGGCAGGCCGCCAGGGCGCAACTGACGCTCAGGCA  
CGAAAGCGCGGGGAGCAAACAGGATTAGATACCCCTCGTAGTCC

>Otu4049

CCAGCCTACGGGGGGCTGCAGTGAGGAATATTGCACAATGGGCGCAAGCCTGATGCAGCG  
ACGCCGCGTGTAGGATGAAGGGGCTTCGCCCTGTAAACTACTGTTAAGAGGGAAGAAAAG  
CTCGTTACGCGAGCTGGGACTGTACCTCTAGAGGAAGGATCGGCTAACTACGTGCCAGCA  
GCCGCGGTAATACGTAGGATCCGAGCGTTGTCCGGAATCACTGGGTGTAAAGGGTGCGCA  
GGCGGGCTTGTGCGTCAGAGGTTAAATATCCCGGCTTAACTGGGAAAAATGCCTTTGATAC  
GGCAAGTCTTGAATATGAGAGAGGATGGTGGAATTCCTGGTGTAGCGGTGAAATGCGTAG  
ATATCAGGAGGAACACCAGTGGCGAAGGCGGCCATCTGGCTCATTATTGACGCTCAGGCA  
CGAAAGCGTGGGGAGCAAACAGGATTAGAAACCCCGTAGTCC

>Otu4050

CCAGCCTATGGGGGGCACCAGTGAGGAATATTGGTCAATGGGGGAAACCCTGAACCAGCG  
ACGCCGCGTGAAGGATGAAGGGGCTTTGCCCTGTAAACTTCTGTGCGGAGGGAAGAAAAG  
CCGGGTTGCCCGGCTGGGACTGTACCTCTAAAGGAAGGGTCGGCTAACTACGTGCCAGCA  
GCCGCGGTAATACGTAGGACCCAAGCGTTGTCCGGATTTACTGGGTATAAAGGGTGCGTA  
GGCGGATTTGTGCGTCAGAGGTTAAATACCCCGGCTTAAACGGGGAAATGCCTTTGATAC  
GGCAGGTCTTGAGTGCAGCGAGGATGGTAGAATTCATGGTGTAGCGGTGAAATGCGTAG  
ATATCATGAGGAATACCCGTGGCGAAGGCGGCCATCTGGCTCGATACTGACGCTCAGGCA  
CGAAAGCGTGGGGAGCAAACAGGATTAGATACCCGGGTAGTCC

>Otu4051

CCAGCCTTGGGTGGCTGCAGTGGGGAATATTCCGCAATGGGCGAAAGCCTGACGGAGCGA  
CGCCGCGTGGATGATGACGGTCTTCGGATTGTAAAGTCCTGTAGAGGGGGAAGAAGGGTG  
CAGCAATGCATTTGACAGTACTCCTAAAGTAGGCTACGGCAAACCTCTGTGCCAGCAGCCG  
CGGTAATACAGAGGTAGCAAGCGTTGTTTCGGAATGACTGGGTGTAAAGCGCGTGTAGGCG  
GTTTTGTAAGTTGAATGTGAAATCCCTTGGCTCAACCAAGGAACGGCATTCAATACTGCA  
TAACTTGAGTGCGAAGAGGAAAGTGGAATTTGGGTGTAGCGGTGAAATGCGTAGATAT  
CCGAAGGAACACCGGTGGCGAAGGCGACTTTCTGGTCCGCAACTGACGTTGAGACGCGAA  
AGCTAGGGGAGCAAACAGGATTAGAAACCCTAGTAGTCC

>Otu4052

CCAGCCTACGGGGGGCAGCAGTTTCGAATCATTCACAATGGGCGAAAGCCTGATGGTGCG  
ACGCCGCGTGAAGGATGAAGGTCTTCGGATTGTAAACCTCTGTCACTAGGGAAGAAACGT  
CAAAACCTAATACGTTTTTGGCCTGACTTAACTGGAGAGGAAGCAGTGGCTAACTCTGTG  
CCAGCAGCCGCGGTAATACAGAGACTGCAAGCGTTATTTCGGATTCACTGGGCGTAAAGGG  
TGCGCAGGCGGCCGTGTGTGTCAGATGTGAAATCCCGGGGCTTAAACCCGGAACCTGCGTC  
TGAAACTACACGGCTAGAGCATTTGGAGAGGGGAAGTGGAATTCATGGTGTAGCAGTGAAAT  
GCGTAGATATCATGAGGAACACCAGAGGCGAGGCGACTTCCTGGACAATTGCTGACGCTC  
AGGCACGAAAGCGTGGGTAGCAAAGGGATTAGATACCCTAGTAGTCC

>Otu4055

CCAGCCTACGGGGTGCTGCAGGGAATCTTGGTAATCTGCGAAAGCGGGAACCAGCAACGC  
CGCGTGTGCGATGAAGGCCTTCGGGTTCGTAAAGCACTTTTCGAGGGGATGAGGAAGGACA  
GTACCCTCGGAATAAGTCTCGGCTAACTACGTGCCAGCAGCCGCGGTAAAACGTAGGAGG  
CAAGCGTTATCCGATTTACTGGGCGTAAAGCGCGTGCAGGCGGTTTCGGTAAGTTGGATG  
TGAAAGCTCCTGGCTCAACTGGGAGAGGTTCGTTCAATACTACCGGACTTGAGAGCAGTAG  
AGGAAGGTGGAATTCCCGGTGTAGTGGTGAAATGCGTAAATATCGGGAGGAACACCAGTG  
GCGAAAGCGGCCTTCTGGACTGTTTCTGACACTCATATGCGAAAGCTAGGGTAGCAAACG  
GGATTAGAAACCCAGTAGTCC

>Otu4060

CCAGCCTACGGGGGGCTGCAGTGGGGAATCTTGCGCAATGGACGAAAGTCTGACGCAGCC  
ACGCCGCGTGAGTGAAGAAGGCCTTCGGGTGTAAAGCTCTGTTCGGAGGGGACAGAAACG  
TCTAAGGTTAATAGCCTTAGATCTTGATGGTACCCTTAAAGGAAGCACCGGCTAACTTCG  
TGCCAGCAGCCGCGGTAATACGAAGGGTGAAGCGTTGCTCGGAATTATTGGGCGTAAAG  
GGTAGGTAGGTGGTTACGTATGTCTGGGGTGAAATCCCTGAGCTCAACTCAGGAAGTGCC  
TTGGAAACGGCGTAAGTAGAGTGCTAGAGAGGTTTCGTGGAATTCAGTGCTAGCGGTGAA  
ATGCGTAGAGATTGGGAGGAACACCAGAGGCGAAGGCGGCGAACTGGATAGCAACTGACA  
CTGAAGTACGAAAGCGTGGGTAGCAAACAGGATTAGATACCCGAGTAGTCC

>Otu4061

CCAGCCTATGGGGGGCTGCAGTAACGAATCTTCCACAATGCACGAAAGTGTGATGGAGCG  
ACGCCGCGTGTTGGGACGAAGCCCTTCGGGGTGTAACCACTGTCAGGGGATAGAAAGTTC  
TGATCATCCCCAGAGGAAGGCACGGCTAACTCTGTGCCAGCAGCCGCGGTAAGACAGAGG  
TGCCAAGCGTTAGGCGGAATCACTGGGCTTAAAGCATGTGTAGGCGGTCCCGTAAGTATC  
TTGTGAAATCCCATGGCTTAACCATGGAAGTGTCTGATATACTGCGGGACTTGAGCCAAC  
TAGGGGCTACCGGAACAAGTGGTGGAGCGGTGAAATGCGTAGATATCACTTGGAACGCCA  
ATGGTGAAAACAGGTAGCTGGGGTGTGCTGACGCTGAGACACGAAAGCCAGGGGAGCAA  
ACGGGATTAGAAACCCCTTGTAAGTCC

>Otu4063

CCAGCCTATGGGTCGCTGCAGTGGGGAATTTTGCACAATGGGGGAAACCCTGATGCAGCA  
ACGCCGCGTGAGGATGAAGTCCCTTCGGGGCGTAAAGCTCTTTCGGCAGGGAAGACTAT  
GACGGTACCTGCAGAAGCAGCTGCGGCTAACTACGTGCCAGCAGCCGCGGTAATACGTAG  
GCAGCGAGCGTTGTTTCGGAGTTACTGGGCGTAAAGGGTGTGTAGGCGGTTATTTAAGTTT  
GGTGTGAAATCTCCCGGCTTAACCGGGAGGGTGCGCCGAATACTGAGTGAAGTAGAGTGCG  
GGAGAGGAGAGTGGAATTCCTGGTGTAGCGGTGAAATGCGTAGATATCAGGAGGAACACC  
GGCGGTGTAGACGGCTCTCTGGACCGCGACTGACGCTGAGACACGAAAGCGTGGGTAGCA  
AACAGGATTAGATACCCCTGTAGTCC

>Otu4071

CCAGCCTACGGGACGCAGCAGTGAGGAATTTTCGTCAATGGGGGCAACCCTGAACGAGCA  
ACGCCGCGTGAGGATGAAGGTTTTTCGGATCGTAAACTGCTTTTCTTGGGGACGAGAACG  
GACGGTACCCAAGGAAGAAGCCCCGGCTAACTACGTGCCAGCAGCCGCGGTAATACGTAG  
GGGGCAAGCGTTGTCCGGATTTATTGGGCGTAAAGCGCACGCAGGCGGTCCTATAAGTTT  
GTACTGACAGTTTCCGGCTCAACCGGAAAAAGGTGTATGAAGACTGTAGGACTTGAGGGCT  
TCAGAGGAATGCGGAATTCGGGTGGAGTGGTGAAATACGTAGATATCCGGAGGAACACC  
AATGGCGAAGGCAGCATTCTGGGAAGTACCTGACGCTCAGGTGCGAAAGCCAGGGGAGCG  
AACGGGATTAGATACCCAGTAGTCC

>Otu4073

CCAGCCTACGGGGTGCTCCAGTTTAGAAATTTGCGCAATGGGCGAAAGCCTGACGCAGCG  
ACGCCGCGTGAGGGATGAAGATCTTCGGATTGTAAACCTCTGTGCAACAAGACGAAAGCT  
TATCGGTGAACAATCGATAAGTTTGACGGTACTGTTAAAGGAAGCTATGGCTAACTCTGT  
GCCGGCAGCCGCGGTAATACAGAGGTAGCGAGCGTTGTCCGGAATTACTGGGCGTAAAGG  
GCGTGTAGGCGGCCGGGTAAAGTCTAGAGTTAAACTCTCAGCTCAACTGAGAGGCGTCTC  
CGGAGACTGCTTGGCTTGAGGACAGTAGAGGAGAGTGGAATTCCTGGTGTAGCGGTGAAA  
TGCGTAGATATCGGGAGGAACACCAGTGGCGAAGGCGGCTCTCTGGTCTGTATCTGACGC  
TGAGGCGCGAAAGCTGGGGGAGCAAACGGGATTAGATACCCCGTAGTCC

>Otu4075

CCAGCCTACGGGACGCTCCAGTGGGGAATCTTGCACAATGGGGGAAACCCTGATGCAGCG  
ACGCCGCGTGAGTGATGAAGCCCTTCGGGGTGTAAGCTCTTTCGGCAGGGACGATAATG  
ACGGTACCTGCAGAAGAAGCTGCGGCTAACTACGTGCCAGCAGCCGCGGTAATACGTAGG

CAGCAAGCGTTGTTTCGGAATTATTGGGCGTAAAGGGTGCGTAGGCGGTGCGGTAAGTCTT  
CTGTGAAATCTCCGGGCTTAAGTTCGGAGCCTGCAGGGGAACTGCCGTGCTGGAGTATGG  
GAGAGGTGAGTGGAATTCCTGGTGTAGCGGTGAAATGCGTAGATATCGGGAGGAACACCT  
GTGGCGAAAGCGGCTCACTGGACCATTACTGACGCTGATGCACGAAAGCTAGGGGAGCAA  
ACAGGATTAGATACCCGTGTAGTCC

>Otu4076

CCAGCCTACGGGGGGCTGCAGTCGAGGATCTTCGGCAATGGGCGCAAGCCTGACCGAGCG  
ACGCCGCGTGTGCGATGAAGGCCTTCGGGTGTAAAGCACTGTCGAGGGGGAGGAAGGCG  
CAAGCTTGACCTATCCCTGGAGGAAGCACGGGCTAAGTTCGTGCCAGCAGCCGCGGTAAAG  
ACGAACCGTGCGAACGTTGTTTCGGAATCACTGGGCTTAAAGGGCGCGTAGGCGGTGCGAG  
AAGTCTCGGGTGAAATCTTTCGGCTCAACCGGAAACGTGCCTGGGATACTGTGCGACTGG  
AGGGAGATAGGGGCGGACGGAACCTCCGGTGGAGCGGTGAAATGCGTTGATATCGGAAGG  
AACGCCGCTGGCGAAAGCGGTCCGCTGGGTCTCTACTGACGCTGAAACACGAAAGCTAGG  
GGAGCAAACGGGATTAGAAACCCAGTAGTCC

>Otu4077

CCAGCCTATGGGTTGCTCCAGTCGAGAATCTTGGGCAATGCGCGAAAGCGTGACCCAGCA  
ATGCCGCGTGCAGGATGAAGGCCTTCGGGTGTAAAGTCTGTCACCCGGGACGAAGAAT  
TGACGGTACCGGGAGAGGAAGCCACGGCTAAGTACGTGCCAGCAGCCGCGGTAAATACGTA  
GGTGGCGAGCGTTGTTTCGGATTTATTGGGCGTAAAGGGTCTGTAGGGGGTTTGCTAAGTC  
TGATGTGAAATCCCGTGGCTCAACCACGGAACGTGATTGGAGACTGGCGGACTAGAGTTC  
TGGAGAGGTAAGCGGAATTCAGGTGTAGCGGTGGAATGCGTAGATATCTGGAAGAACAC  
CGATAGCGAAGGCAGCTTACTGGACAGCGACTGACCCTGAAAGACGAAAGCGTGGGAAGC  
AAACAGGATTAGATACCCGCGTAGTCC

>Otu4078

CCAGCCTATGGGTGGCAGCAGTAGGGAATATTGCGCAATGGAGGAACTCTGACGCAGCG  
ACGCCGCGTGGGTGACGAAGGCCTTCGGGTGCTAAAGCCCTGTCGGAAGGGAAGAAAAAC  
GGTATGGCTAACATCCATACCGCTTGACGGTACCTTTAAAGGAAGCACCGGCTAACTACG  
TGCCAGCAGCCGCGGTAAATACGTAGGGTGCAAGCGTTGTTTCGGAATCATTGGGCGTAAAG  
CGCGTGTAGGTGGTTAGTTAAGTCGATTGTGAAATCCCTGGGCTCAACCGAGGAAGTGCA  
GTCGAAACTAACTAGCTAGAGGACGGCAGAGGAAGGTGGAATTCGAAGTGTAGAGGTGAA  
ATTCGTAGATATTTGGAGGAATACCGGTGGCGAAGGCGGCCTTCTGGACCGTTCTTGACA  
CTGAGACGCGAAAGCGTGGGGAGCAAACAGGATTAGATACCCAGTAGTCC

>Otu4079

CCAGCCTACGGGTGGCTGCAGTCGGGAATTTTGGGCAATCCCCGCAAGGGTGATCCAGCG  
ATACCACGTGAGTGATGAAGTCTTTTGAATGTAAAGCTCTGTCAGGGGATGAGAAAAGA  
ATACGGTGAATAGCCAGATTCTGTTGACTATCCCCAGAGGAAGCTCCGGCCAACTCCGTGC  
CAGCAGCCGCGGTAAATACGGGGGGAGCAAGCGTTGCCCGGAATCACTGGGCGTAAAGGGT  
GTGTAGGTGGATTTGCAAGTCAAACGTGAAATCTTACAGCTCAACTGTAAAATGGCGTTT  
GAAACTGCATTTCTTGAGTACGGGAGAGGAGAATGGAATTTAGGTGTAGCGGTGAAATG  
CGTAGATATCTGAAAGAACACCGGTTGCGAAGGCTATTCTCTATCCTAATACTGACACTG  
TGACACGAAAGCTAGGGGAGCAAACAGGATTAGATACCCCTGTAGTCC

>Otu4080

CCAGCCTATGGGTGCGACCAGTAGGGAATATTGGTAATGTGCGAAAGCGCGAACCAGCAA  
CGCCGCGTGCACGATGAAGGCCTTCGGGTGTAAAGTGCCTTTAGAGAGGATGAGGAAGG  
ACAGTACTCTCTGAATAAGCCTCGGCTAAGTTCGTGCCAGCAGCCGCGGTAAACAGTAGG  
AGGCAAGCGTTATCCGGATTTACTGGGCGTAAAGCGCATGCAGGTGGTTCGGTAAGTTGG  
ATGTGAAAGCTCCTGGCTCAACTGAGAGAGGTCGTTCAATACTACCGGACTTGAGAGCAG  
TAGAGGGAGGTGGAATTCCTGGTGTAGTGGTGAATGCGTAGATATCGGGAGGAACACCA  
GTGGCGAAAGCGGCCTCCTGGACTGTTTCTGACACTCATATGCGAAAGCGTGGGTAGCAA  
ACAGGATTAGAGACCCCTCGTAGTCC

>Otu4081

CCAGCCTATGGGTGCGCAGCAGTGGGGAATATTGGACAATGGGCGCAAGCCTGATCCAGCC  
ATGCCGCGTGAAGTGAAGGCCTTCGGGTGTAAAGTCTTTTCGGCAGGGAAGATTATG  
ACGGTACCTGCAGAAGCAGCTGCGGCTAAGTACGTGCCAGCAGCCGCGGTAAATACGTAGG  
CAGCAAGCGTTGTTTCGGAGTTACTGGGCGTAAAGGGTGTGTAGGCGGTGTTTAAAGTTTG  
GTGTGAAATCTCCCGGCTCAACCGGGGGGGTGCGCCGAATACTGAGCGACTAGAGTGCAGG  
GAGAGGAGAGTGGAATTCCTGGTGTAGCGGTGAAATGCGTAGATATCAGGAGGAACACCG  
GTGGTGCAGACGGCTCTCTGGACCGCGACTGACGCTGAGACACGAAAGCGTGGGTAGCAA

ACAGGATTAGAAACCCGCGTAGTCC

>Otu4083

CCAGCCTATGGGGTGCTCCAGTGGGGAATCTTGCGCAATGGGCGAAAGCCTGACGCAGCA  
ACGCCGCGTGAGCGAAGAAGGCCTTCGGGTGTAAAGCTCTGTCAGGAGGGACGAAGCCA  
CTCGGGTTAATAGCCCAGAGGGTGACGGTACCTCCAGAGGAAGGTCCGGCTAACTACGTG  
CCAGCAGCCGCGGTAATACGTAGGGACCAAGCGTTGTCCGGAATTATTGGGCGTAAAGAG  
CGTGTAGGCGGTTTGCTAAGTCCGGTGTGAAATGTCGGGGCTCAACCCCGGAAGTGCATT  
GGAAACTGGCTGACTTGAGTCCGGAAGAGGAGACTGGAATTCCTGGTGTAGCGGTGAAAT  
GCGCAGATATCAGGAAGAACACCCGTGGCGAAGGCGGGTCTCTGGGACGGTACTGACGCT  
GAGACGCGAAAGCGTGGGGAGCAAACAGGATTAGATACCCCTGTAGTCC

>Otu4085

CCAGCCTATGGGTTGCAGCAGTCGAGAATCATTACAAATGGGGGAAACCCCTGATGATGCG  
ACGCCGTGTGAGCGATGAAGGCCTTCGGGTGTAAAGCTCTTTCGTAAGGGAACAAGAAA  
AAGAGACGAATAATCTTTTGATTTGAGAGTACCTTATAAAGAAGCACCCGGCTAACTCCGT  
GCCAGCAGCTGCGGTAATACGGAGGGTGCAAGCATTAATCGGAATTATTGGGCGTAAAGG  
GCGCGTAGGCTGATAGGAAAGTCAGATGTGAAATTTTCGGAGCTCAACTTCGAAGCGGCAT  
TTGAAACTCCCTGTCTAGAGGATAGGCGGAGAAAACGGAATTCACGTGTAGCGGTGAAA  
TGCGTAGAGATGTGGAAGAACACCTGTGGCGAAAGCGGTTTTCTAGCTTACACCAGACGC  
TGATGCACGAAAGCTAGGGGAGCAAACAGGATTAGAAACCCGCGTAGTCC

>Otu4091

CCAGCCTATGGGTTGCTCCAGTAGGGAATATTGGTTAATCTGCGAAAGCGGGAACCAGCA  
ACGCCGCGTGTGCGATGAAGGCCTTCGGGTGTAAAGCACTTTTTGGAGGGATGAGGAAG  
GACAGTACCTCCAGAATAAGCCTCGGCTAACTACGTGCCAGCAGCCGCGGTAAAACGTAG  
GAGGCAAGCGTTATTCGGATTTACTGGGCGTAAAGCGTGTGCAGGCGGTTTCGGAAGTTG  
GATGTGAAAGCTCCCGGCTTAACTGGGAGAGGTCGTTCAATACTACCGGACTTGAGAGCA  
GTAGAGGAAGGTGGAATTCCTGGTGTAGTGGTGAATGCGTAGATATCGGGAGGAACACC  
AGTGGCGAAAGCGGCCTTCTGGACTGTTTCTGACACTCATATGCGAAAGCTAGGGTAGCA  
AACGGGATTAGAGACCCTCGTAGTCC

>Otu4098

CCAGCCTATGGGAGGCACCAGTGAGGAATATTGGTCAATGGACGCAAGTCTGAACCAGCC  
ATGCCGCGTGAAGGATGAAGGCCCTACGGGTGTAAACTTCTTTTGACGGGACGAAACT  
ATGTTACGTGTAATGTACTGACGGTACCGTATGAATAAGCAACGGCTAACTCCGTGCCAG  
CAGCCGCGGTAATACGGAGGTTGCAAGCGTTATCCGGATTTATTGGGTTTAAAGGGTGCG  
TAGGCGGGACGATAAGTCAGTGGTGAAGCCTGCAGCTTAACCGTAGAATTGCCATTGAT  
ACTGTCGTTCTTGAGTGTAGTTGAGGTGGGCGGAATGTGTAATGTAGCGGTGAAATGCTT  
AGAGATTACACAGAACACCGATTGCGTAGGCAGCTCACTAACTATAACTGACGCTGAGG  
CACGAAAGCGTGGGGAGCAAACAGGATTAGAAACCCCTGTAGTCC

>Otu4099

CCGCCTATGGGGCGCTCCAGGCACGAAACCTCTACAATATACGCAAGTGTGATAGGGGGA  
CCCAGAGTGCTTATCTCTAAGATAAGCTTTTGTCAAGGGTAAATACCTTGAAGAATAAGT  
GGTGGGCAAGACTGGTGCCAGCCGCGCGGTAACACCAGCGCCACGAGTAGGAACCGCGT  
TTATTTGGTCTAAAGCATCCGTAGCAGGATTGACAAGTTCTTTGTGAAATTGTTGGGCTT  
AACCTAACAGCGTGCAAAGAAGACTATCTTTCTCGAGACTGGAGAGGAGTTAGAGGTATT  
CTGGGGGGAGCGGTAAAATGCTATAATCCCCAGACGACCACCTGTGGCGAAGGCGTCTAA  
CTAGAACAGTTCTGACTGTGAGGGATGAAAGCTGGGGGAGCGATCCGGATTAGAAACCCC  
CGTAGTCC

>Otu4100

CCAGCCTATGGGATGCTGCAGACGAGAATATTCGACAATGGACGAAGGTCTGATCGAGCG  
ACGCCGCGTGAGGATGAAGTGCTTCGGCATGTAACTCCTTTTGCCAGGGAAAAAGTCT  
ATTGATTGTACCTGGAGAATAAGAGGTTGCTAAACTCGTGCCAGCAGCAGCGGTAATACG  
AGTGCCTCGAGCGTTATCCGGAATTATTGGGCGTAAAGGGTGCGTAGGCTGTTCTGTTAG  
TCTCATGTTAAATTTCCCGGCTCAACCGGGAAGCCGCATGGGAAACGGCAGGACTTAGAG  
GTTGGAAGGGGTTTGCGGAATCATGGTGTAGCGGTGAAATGCGTTGATATCATGGGGAA  
CACCAAAGCGAAGGCAGCAAACCTGGTCCAAATCTGACGCTGAAGCACGAAAGCGTGGGT  
CGCGAATGGGATTAGATACCCCACTAGTCC

>Otu4105

CCAGCCTACGGGTGGCAGCAGCCGAGAATATTCGACAATGGGCGAAAGCCTGATCGAGCG  
ACGCCGCGTGAGGACGAAGTCCTTAGGGACGTAAACTCCTTTTATAGGTTAGAAAGTTA

TTGATCAACCTAGGAATAAGAGGTTGCTAAACTCGTGCCAGCAGCAGCGGTAATACGAGT  
GCCCTCAAGCGTTATCCGGAATTACTGGGCGTAAAGGGTGTGTAGGCGGTTTTGTAGTCT  
TCTGTCAAATTCTTCGGCTTAACCGGGGGCTCGCAGAGGAAACGGCAAACTAGAGGATG  
CGAGAGGCACGTAGAACTCATGGTGTAGGGGTGAAATCCGTTGATATCATGGGGAATACC  
AAAAGCGAAGGCAGCGTGCTGGCGCATTTCTGACGTTGAAACACGAAAGCGTAGGTAGCG  
AACGGGATTAGAAACCCCCGTAGTCC

>Otu4110

CCAGCCTATGGGGCGCAGCAGTAAGGGATATTGCTCAATGGGCGAAAGCCTGAAGCAGCA  
ACGCCGCGTGGAGGATGAAGGTCTTCGGATCGTAAACTTCTTTTTACAGGGACGAGATAG  
GACGGTACCTGTAGAATAAGCCTCGGCTAACTACGTGCCAGCAGCCGCGGTAAAACGTAG  
GAGGCGAGCGTTATCCGGATTTACTGGGCTTAAAGGGTGTGCAGGCGGTTGACTAAGTCG  
TGCATGAAAGCCATGTGCTTAACACGTGGAGGCTGTGCGAGACTGGTCGGCTAGAGTGTG  
TGAGAGGGAAGCAGAATTCCGGGTGTAGTGGTGAATGCGTAGATATCCGGAGGAATACC  
AGAGGCGAAGGCGGCTTCCTGGCACACTACTGACGCTGAGACACGACAGCATGGGGAGCG  
AACGGGATTAGAAACCCCCGTAGTCC

>Otu4111

CCAGCCTATGGGGTGCTGCAGCGATACCACGTGAGTGATGAAGTTCTTTGGAATGTAAAG  
CTCAGTCAGGGGATGAGAAAAGGATTTGGTGAATAGCCAGATCCGTTGACTATCCCCAGA  
GGAAGCTCCGGCCAACCTCCGTGCCAGCAGCCGCGTAATACGGGGGGAGCAAGCGTTGCC  
CGGAATCACTGGGCGTAAAGGGTGTGTAGGTGGATCTGCAAGTCAAGTGTGAAATCTTAC  
GGCTTAACCGTAAAATTGCGCTTGAAACTGCATTTCTTGAGTACGGGAGAGGAGAATGGA  
ATTTACAGGTGTAGCGGTGAAATGCGTAGATATCTGAAAGAACACCGGTTGCGAAGGCTAT  
TCTCTATCCTAATACTGACACTGTGACACGAAAGCTAGGGGAGCAAACAGGATTAGATAC  
CCGAGTAGTCC

>Otu4113

CCAGCCTACGGGGCGCTGCAGGGAGGAATATTGGGCAATGGACGAAAGTCTGACCCAGCA  
ACGCCGCGTGAAGGATGAAGGCCTTCGGGTGCTAAACTTCTTTTGAGGGAGAAGAGAAAG  
GACGGTATCCCTCGAATAAGCCACGGCTAACTACGTGCCAGCAGCCGCGGTAAAACGTAG  
GTGGCGAGCGTTATCCGGATTCATTGGGCGTAAAGAGCTTGTAGGTGGTTGCGTAAGTTG  
GACGTGAAAACCTCCGGGCTTAACCTGGAGAGGCCGTTCAATACTGTGCGACTAGAGGATG  
TCAGAGGGAAGTAGAATTCCCTGGTGTAGCAGTGAAATGCGTAGATATCAGGAGGAATACC  
CGTGGCGAAGGCAGCTTCCTGGGACATAACTGACACTGAGAAGCGAAAGCTAGGGGAGCA  
AACGGGATTAGATACCCTTGTTAGTCC

>Otu4116

CCAGCCTACGGGGTGCTCCAGTAAGGGATATTGCGCAATGGGCGAAAGCCTGACGCAGCA  
ACGCCGCGTGGAGGAAGAAGGCCTTCGGGTGCTAAACTCCTTTTGTGGGGGACGAGGAAG  
GACGGTACCTCACGAAGAAGTCACGGCTAACTACGTGCCAGCAGCCGCGGTAAAACGTAG  
GTGGCGAGCGTTATCCGGATTTACTGGGCGTAAAGCGTGTGCAGATGGGTCACCAAGTGG  
TGTATGAAATCCCTGAGCTTAACCTAGAGAGGTTATGCCAGACTGGTGGTCTAGAGAACG  
GGAGAGGGACGTGGAATTCCGGGTGTAGTGGTGAATGCGTAGAGATCCGGAGGAACCCC  
TGAGGCGAAGGCGGCGTTCCTGGCCGATTCTGACATTCAGACACGACAGCATGGGGAGCG  
AACGGGATTAGAGACCCTCGTAGTCC

>Otu4117

CCAGCCTACGGGGGGCTGCAGTCGAGAATCATTCGCAATGGGCGCAAGCCTGACGATGCG  
ACGCCGTGTGTGCGATGAAGGCCTTCGGGTGTAAGCACTTTTCGCTTGGAACAAGGGA  
AACTGGCTAATATCCAGCGTACTTGAGGGTACCAGGTAAAGAAGCACCGGCTAACTCCGT  
GCCAGCAGCTGCGGTAATACGGAGGGTGCGAGCATTAATCGGATTTATTGGGCGTAAAGG  
GCGCGTAGGCGGGAACATAAGTCGGATGTGAAATCCCAGGGCTCAACCCTGGAACAGCAT  
TTGATACTGTGTTTCTAGAGGGTAGGCGGAGAAAATGGAATTCACAAAGTAGCGGTGAAA  
TGCGTAGATATGTGGAAGAACACCGGTGGCGAAGGCGATTTTCTAGCTTATACCTGACGC  
TGAGGCGCGAAAGCAAGGGGATCAAACAGGATTAGAGACCCTAGTAGTCC

>Otu4118

CCAGCCTACGGGTGGCAGCAGTAACGAATCTTCGCAATGCACGAAAGTGTGACGGAGCG  
ACGCCGCGTGTGGGACGAAGCCCTTCGGGGTGTAACCCTGTCAGGGGAAAGAAAGTTC  
TGATCTACCCCAAAGGAAGGGACGGCTAACTCTGTGCCAGCAGCCGCGGTAATACAGAGG  
TCCCGAGCGTTAGGCGGAATCACTGGGCTTAAAGCGTGTGTAGGCGGATCTGTAAGTACC  
TTGTGAAATCCCATGGCCCAACCATGGAAGTCTTGGTATACTGCGGATCTTGAGCTAGC  
TAGGGGCAACCGGAACAGACGGTGGAGCGGTGAAATGCGTAGATATCGTCTGGAACGCCA

ATGGTGAAAACAGGTTGCTGGGGCTAAGCTGACGCTGAGACACGAAAGCCAGGGGAGCAA  
ACGGGATTAGAAACCCAGTAGTCC  
>Otu4120  
CCAGCCTATGGGGTGCAGCAGTTTTCGAATCATTTACAATGGGCGAAAGTCTGATAGTGCG  
ACGCCGCGTGGGGGATGAAGGTCTTCGGATTGTAAACCCCTGTCACCGGGGAACAAACGC  
GTACGGTTAATAGCCGTCCGCCTGAGCTAACCCGGAGAGGAAGCCGTGGCTAACTCTGTG  
CCAGCAGCCGCGGTAATACAGAGACGGCGAGCGTTACTCGGATTTACTGGGCGTAAAGGG  
TGCGTAGGTGGCCAAGTGTGTCGGGTGTGAAATCCCGGAGCTCAACTCCGGAAGTGCGCC  
CGAAACTACTTGGCTTGAGGCTTGAGAGGGGTGATAGAATTCCTGGTGTAGCGGTGAAAT  
GCGTAGATATCAGGAGGAATACCAACGGCGAAGGCAGTCACCTGGACAAGTTCTGACACT  
GAGGCACGAAAGCGTGGGGAGCAAAGGGATTAGAAACCCCTCGTAGTCC  
>Otu4121  
CCAGCCTATGGGAGGCAGCAGTCGAGAATTTTTCTCAATGGGCGAAAGCCTGAAGGAGCG  
ACGCCGCGTGGGGGATGAATGGCTTCGGCCCGTAAACCCCTGTCATTTCGGGATCAATGCG  
TCTGGGTGAACATCCCAGACGTTGATAGTACCGGAAGAGGAAGGGACGGCTAACTCTGTG  
CCAGCAGCCGCGGTAATACAGAGGTCCCAAGCGTTGTTTCGGATTTACTGGGCGTAAAGCG  
CGTGCAGGCGGTTCTGTAAGTTGGATGTGAAATCTCCGGGCCTAACCCGGAAGTGCCTT  
GGATACTATCCGGCTAGAGGAATGGAGGGGAGACTGGAATACTTGGTGTAGCAGTGAAAT  
GCGTAGATATCAAGTGGAACACCAGTGGCGAAGGCGAGTCTCTGGACATTTCTGACGCT  
GAGGCACGAAAGCCAGGGGAGCAAACGGGATTAGAGACCCTAGTAGTCC  
>Otu4123  
CCAGCCTACGGGGGGCACCAGGCGCGAAAACCTTTACAATGCGCGAAAGCGTGATAAGGGA  
ATTCCAAGTGCTTGGCCTTTGAGTCGAGCTTTTGCCGAGTGTAATAATCTCGGAGAATAA  
GTGGTGGGTAAGACGGGTGCCAGCCGCCGCGGTAACACCTGCGCCACGAGTGGGAGCCAC  
TTTTATTGGGTCTAAAGCGTTCGTAGCTGGAGTATTAACCTCCCTTGTGAAATTGTTGTGC  
TTAACATAACATCGTGCAAGGGGAACTGGTACTCTTGAGACTGGGAAGAGCTTGGAGTAT  
GCCAAGGGGAGCGGTAAAATGTTATAATCCTTGGTAGACTACCTGTGGCGAAGGCGCCAA  
GCTAGAACAGGTCTGACAGTGAGGGACGAAGGCTAGGGGAGCAAACCGGATTAGATACCC  
CCGTAGTCC  
>Otu4125  
CCAGCCTATGGGTGGCACCAGGCGCGAAACCTTTACAATGCACGAAAGTGTGATAGGGGA  
ACTCAGAGTGCAATATACTTTTAGTATATGCTTTTGCCAACTCGAAAATGGTTGGAGAATA  
AGTGGTGGGCAAGACTGGTGCCAGCCGCCGCGGTAACCCAGCGCCACAAGTGGGAATCG  
GTATTATTGGGTCTAAAGCGTCCGTAGCAGTTTTTCTAAATTACTTGTGAAATCACATCG  
CTCAACGGTGTGGACTGCAGGTAAGACTGGAAAACCTAGAGACTGGGAGACGTTGGAGGTA  
TTCAAAGGGGAGCGGTAAAATGCGAGAATCCTTTGAAGACCACCTGTTGCGAAGGCGTCC  
AACATAACAGGTCTGACTGTGAGGGGCGAAAGCTAGGGGAGCGAACCAGGATTAGGTACC  
CGAGTAGTCC  
>Otu4131  
CCAGCCTATGGGTGGCAGCAGTAAGGAATATTGGACAATGCCCCGAAGGGTGATCCAGCC  
ATGCCGCGTGCAAGGAAGAAGGCCCTATGGGTGCTAAACTGCTTTTGAACAAGAGAAAACC  
CCTCTACGTGTAGAGGGCTGATAGTATTGTTAGAATAAGCATCGGCTAACTTCGTGCCAG  
CAGCCGCGGTAAGACGAAGGATGCAAGCGTTATCCGGATTCATTGGGTTTAAAGGGTGCG  
TAGGCGGCCCCGTAAGTCAGTGGTGAATCTCCTTGCTTAACAAGGAACTGCCATCGAT  
ACTGCTGGGCTTGAGTACAGATGCTGTGGGCGGAATATGACATGTAGTGGTGAATACAT  
AGAGATGTCATAGAACACCGATTGCGAAGGCAGCTCACAAAACCTGTAAGTACGCTGAGG  
CACGAAAGTGCGGGGATCAAACAGGATTAGAAACCCAGTAGTCC  
>Otu4135  
CCAGCCTATGGGTGGCAGCAGTCGAGAATTTTTCAATGGGCGAAAGCCTGATGGAGCG  
ACGCCGCGTGGGGGATGAATGGCTTCGGCCCGTAAACCCCTGTCATTTGCGAACAAACCT  
TGTTATTTAAAGATGACAAGCTGATAGTAGCGAAAGAGGAAGGGACGGCTAACTCTGTG  
CCAGCAGCCGCGGTAATACAGAGGTCCCAAGCGTTGTTTCGGATTCACTGGGCGTAAAGGG  
TGCGTAGGTGGTGGGTAAGTCTGACGTGAAATCTCCGAGCTTAAGTTCGGAAACGGCGTC  
GGATACTATTTCGGCTGGAGGGTTGGAGGGGGGACTGGAATACTTGGTGTAGCAGTGAAAT  
GCGTAGATATCAAGTGGAACACCAGTGGCGAAGGCGAGTCCCTGGACAACCTCTGACACT  
GAGGCACGAAAGCTAGGGGAGCAAACAGGATTAGATACCCCTCGTAGTCC  
>Otu4136  
CAGCCTACGGGAGGCAGCAGTGGGGAATATTGGACAATGGGCGCAAGCCTGATCCAGCCA

TGCCGCGTGAGTGATGAAGGCCTTAGGGTTGTAAAGCTCTTTTGTCCGGGACGATAATGACG  
CGGTACCGGAAGAATAAGCCCCGGCTAACTTCGTGCCAGCAGCCGCGGTAATACGAAGGG  
GGCTAGCGTTGCTCGGAATCACTGGGCGTAAAGGGCGCGTAGGCGGCCATTCAAGTCGGG  
GGTGAAGCCTGTGGCCCAACCACAGAATTGCCTTCGATACTGTTTGGCTTGAGTATGGC  
AGAGGTCAGTGGAAGTGCAGAGTGTAGAGGTGAAATTCGTAGATATTCGCAAGAACACCAG  
TGCGCAAGGCGGCTGACTGGGCCATTACTGACGCTGAGGCGCGAAAGCGTGGGGAGCAAA  
CAGGATTAGAAACCCAGTAGTCC

>Otu4140

CCAGCCTATGGGTTGCAGCAGTCGAGAATTTTTCACAATGGGCGCAAGCCTGATGGAGCG  
ACGCCGCGTGGGGGATGAATGGCTTCGGCCCGTAAACCCCTGTCATTTCGCGAACAATGTC  
CATGCATTAAACACCGTATGGATTGATAGTAGCGGAAGAGGAAGGGACGGCTAACTCTGTG  
CCAGCAGCCGCGGTAATACAGAGGTCCCAAGCGTTGTTTCGGATTTACTGGGCGTAAAGGG  
TGCGTAGGTGGTCGGGTAAGTCTGATGTGAAATCTCGGAGCCTAACTCCGAAACGGCATT  
GGATACTATTTCGGCTCGAGGGTTGGAGGGGGGACTGGAATTCTCGGTGTAGCAGTGAAAT  
GCGTAGATATCGAGAGGAACACCGGTGGCGAAGGCGAGTCCCTGGACAACCTCCTGACACT  
AAGGCACGAAAGCTAGGGGAGCAAACAGGATTAGATACCCCGGTAGTCC

>Otu4141

CCAGCCTATGGGTGGCTGCAGTAGGGAATTTTGGACAATGGGCGAAAGCCTGATCCAGCA  
ACGCCGCGTGCAGCATGACAGCCTTCGGGTTGTAAAGCGCTTTTAGGGGAGATGAGAAAG  
GACAGTATCCCTGAATAAGCCTCGGCGAACTACGTGCCAGCAGCCGCGGTAAAACGTAG  
GAGGCTAGCGTTATCCGGATTTATTGGGCGTAAAACGTGTGCAGGCGGTTTAGCAAGTTG  
GATGTGAAAGCTCCCGGCTTAACTGGGAGAGGTCGTTCAAACTGCTAGACTAGAGGATG  
GGAGAGGGAGGTGGAATTCCGGGTGTAGTGGTGAATGCGTAGATATCCGGAGGAACACC  
AGTGGCGAAAGCGGCCTCCTAGACCATTTCTGACGCTTAGACACGAAAGCTAGGGGAGCA  
AACGGGATTAGAAACCCCGGTAGTCC

>Otu4148

CCAGCCTACGGGTCGCAGCAGCTAAGAATATTCGCAATGGGAGATATCCTGACGGAGCG  
ACGCCGCGTGAACGAAGAAGGCAGAAATGTTGTAAAGTTCTTTTATACGGGAAGAATAAG  
GGCAGGAGTGGAAGTTTGCCTGGTGACGGTACCGTATAAATAAGCCACGGCTAACTACG  
TGCCAGCAGCCGCGGTAATACGTAGGTGGCAAGCGTTGTTTCGGAATTATTGGGCGTAAAG  
GGCATGTAGGCGGTAAGATAAGTGTGAATTGAAAGACTGAGGCTTAACCTCACGTTTGGT  
TTGCAAACCTGTCTAACTAGAGTGCAGAAGGGGAAACTGGAATTCCGCGTGTAGGGGTGAA  
ATCTGTAGATATGCGGAAGAATACCTGTGGCGAAGGCGAGTTTCTGGTCTGTAAGTACG  
CTGAAATGCGAAAGTGTGGGGAGCAAACAGGATTAGAAACCCTGGTAGTCC

>Otu4149

CCAGCCTATGGGGGGCACCAGCTAAGAATATTCGCAATGGGGGAAACCCTGACGGAGCA  
ATCTCGCGTGAGTGATGAAGGCTTTCGGGTTGTAAAGCTCTTTTGGCGGGGAAGAGTAAG  
GTCATCAGGAAATGGGTGATCGACGACGGTACCCGCGAAGAAGGACCGACTAATTACGT  
GCCAGCAGTCGCGGTAATACGTAGGGTTCAAACGTTGTTTCGGAATCATTGGGCGTAAAGG  
GTACGCAGGCGGTTTTCTAAGTCAGTGGTGAAAATCTGAGGCTTAACCTCAGAACTGCCA  
TTGATACTGGGAGACTAGAGTTGTAATAGGGGTGGCGGGAATTCCAAGTGTAGGAGTGAA  
ATCTGTAGATATTTGGAGGAACACCAATAGCGAAGGCAAGCCACTGGTTAACGACTGACG  
CTCAGGTACGAGAGCTAGGGGAGCAAATGGGATTAGAGACCCCGTAGTCC

>Otu4151

CCAGCCTATGGGATGCTGCAGTGGGGAATCTTGACAATGGGGGCAACCCTGATGCAGCG  
ACGCCGCGTGAACGATGAAGCCCTTCGGGGCGTAAAGTTCTTTTCGGCAGGAACGATAATG  
ACGGTACCTGAAGAAGAAGCTGCGGCTAACTACGTGCCAGCAGCCGCGGTAATACGTAGG  
CAGCAAGCGTTGTTTCGGAGTTACTGGGCGTAAAGAGTGTGTAGGCGGTTTTCTAAGTTTG  
TTGTGAAATCTCCCAGCTCAACCGGGAGGGTGCGGCGAAGACTGGAAAGCTTGAGTATGG  
GAGAGGAAAGCGGAATTTCCGGTGTAGCGGTGAAATGCGTAGATATCGGAAGGAACACCT  
GCGGTGTAGACGGCTTTCTGGACCATCACTGACGCTGAGACACGAAAGCGTGGGTAGCAA  
ACAGGATTAGAAACCCGCGTAGTCC

>Otu4155

CCAGCCTATGGGTCGCTGCAGTGGGGAATATTGCACAATGGGCGCAAGCCTGATGCAGCG  
ACGCCGCGTGGAGGAAGAAGGCTTTCGAGTTGTAAACTCCTGTAAAGTGGGAAGAAAGAC  
TGTTGACTAATAATCAACAGGGATGACGGTACCACTAGAGAAAGCACCGGCAAACCTTCGT  
GCCAGCAGCCGCGGTAATACGAAGGGTGCAAGCGTTATTTCGGAGTTACTGGGCGTAAAGA  
GTATGTAGGCGGTTTATTAAAGTTAGTTGTTAAATACCATGGCTTAACCTATGGAAAGGCAG

CTGATACTGATGAGCTAGAGCGCAGAAGAGAGGAGTGGAAATCCCCGGAGTAGCGGTAAAA  
TGCGTAGATCTCGGGAGGAACACCGGTTGCGAAGGCGGCTTCTTGGTCTGTGGCTGACGC  
TAAAGTACGAAAGCGTGGGGAGCAAACAGGATTAGAAACCCGTGTAGTCC

>Otu4162

CCAGCCTACGGGGTGCAGCAGTCAAGAACCTTCCGCAATGGACGAAAGTCTGACGGAGCG  
ACGCCGCGTGAGGATGAAGTGCTTCGGCATGTAACTCCTTTTGCCAGGGAAAAAGTTT  
ATTGATTGTACCTGGAGAATAAGAGGTTGCTAACTCGTGCCAGCAGCAGCGGTAATACG  
AGTGCCTCGAGCGTTATCCGGAATCATTGGGCGTAAAGGGTGTGTAGGCGGCGATGTTAG  
TCTCCCGTAAAAATCTTCCGGCTCAACCGGGAGTCCGCGGGAGAAACGGCATTGCTCGAGA  
TTGGAAGGGGTCTCTGGAATCTAGGTGTAGCGGTGAAATGCGTTGATATCTAGGGGAAC  
ACCAAAGCGAAGGCAGGAGACTGGTCCATTTCTGACGCTGAAACACGAAAGCGTGGGTA  
GCGAATGGGATTAGAGACCCCAGTAGTCC

>Otu4163

CCAGCCTATGGGGGGCAGCAGTAGGGAATATTGCACAATGGAGGAAACTCTGATGCAGCG  
ACGCCGCGTGAGTGATGAAGGACTTCGGTTCGTAAAGCTCTGTCTGATGGGAATAAGAAA  
GTGAATGTACCATGCAAGAAAGGATCGGCTAACTTCGTGCCAGCAGCCGCGGTAAGACGA  
GGGATCCTAGCGTTGTTTCGGAATCATTGGGCGTAAAGCGGATGTAGGTGGCTTTGTAAAGT  
CAGATGTGAAAGCCCAGGGCTCAACCCTGGAAGTGCATTTGATACTGCGAAGCTTGAGTG  
CTAGAGAGGTTACTAGAATACCTGGTGTAGTGGTGAAATACGTAGATATCAGGTGGAATA  
CCGGAGGCGAAGGCGGGTAACTAGCTAGACACTGACACTGAGATCCGAAAGTGTGGGGAT  
CAAACAGGATTAGATACCCGTGTAGTCC

>Otu4165

CCAGCCTATGGGAGGCTGCAGTTAGGAATTTTGCGCAATGGACGAAAGTCTGACGCAGCG  
ACATCGCGTGAGGATGACGGCCTTCGGGTGTAAACTCCTTTTGCTTTTCATGAAGAA  
AAGGCGAATAAGCAACTACTAACTACGTGCCAGCAGTCGCGGTAATACGTAGGTTGCAAG  
CGTTACCCGGTTTTACTGGGCGTAAAGAGTCTGTAGGTGGTTTTTCCAAGTCTTGTTTTCAA  
AGACCCCGGCCTAACCAGGGGAAGGGGCAGGATACTGGGAGACTAGAGTTATATCGGGGT  
TACTGGAATTTGCAGTGTAGGGGTAAAATCCGTGGATACTGCAAAGAACACCAAGCGCAA  
AGGCGGGTAACCAGGTATGTACTGACACTCAGAGACGAAAGCTAGGGTAGCAAATCAGAT  
TAGAAACCCTGGTAGTCC

>Otu4167

CCAGCCTACGGGGGGCTGCAGCTAAGAATATTCCGCAATGGGAGATATCCTGACGGAGCG  
ACGCCGCGTGATGAAGAAGGCAGAAATGTTGTAAAGTACTTTTATACGGGAAGAATAAG  
GTAGGTAATGGAAGATCTATTGATGACGGTACCGTATGAATAAGCCACGGCTAACTACG  
TGCCAGCAGCCGCGGTAATACGTAGGTGGCAAGCGTTGTTTCGGATTTATTGGGCGTAAAG  
GGCATGTAGGCGGTTAGATAAGTGTGAATTGAAAGGCGTAGGCTTAACCTATCGTTTGGT  
TTGCAAATCTCTGACTAGAGTGCAGAAGGGGAAACTGGAATTCCGCGTGTAGGGGTGAA  
ATCTGTAGATATGCGGAAGAATACTTGTGGCGAAGGCGAGTTTCTGGTCTGTAACTGACG  
CTGAAATGCGAAAGTGTGGGGAGCAAACAGGATTAGAGACCCGCGTAGTCC

>Otu4168

CCAGCCTACGGGACGCACCAGTAGGGAATATTGCGCAATGGGCGAAAGCCTGACGCAGCG  
ACGCCGCGTGACGATGAAGTTCTTCGGAATGTAAAGTCTGTACAGGAGGGAAGAAAACC  
TTGGGTGTTAAATCCAAGGCTGACGGTACCTCCAGAGGAAGCTACGGCTAACTTCGTGCC  
AGCAGCCGCGGTAATACGGGGTAGCGAGTGTTGTTTCGGATTTACTGGGCGTAAAGGGAG  
CGCAGGCGGTAAGATAAGTCAGGAGTGAAAGGTTGGGGCTTAACCCCAAACCTGCTTTTG  
ATACTGTCTTGCTAGAGTATGCGAGAGGAGGATGGAATTTAGGTGTAGCGGTGGAATGT  
GTAGATATCTAGAAGAACACCGATTGCGAAGGCAGTCCTCTGGTGCAATACTGACGCTCA  
AGCTCGAAAGCTAGGGGAGCAAACAGGATTAGATACCCCAGTAGTCC

>Otu4170

CCAGCCTACGGGTCGCACCAGTTAGGAATTTTGCACAATGGACGAAAGTCTGATGCAGCG  
ACATCGCGTGAGGATGAAGGCCCTCGGGTCGTAAACTTCTTTTCTATCTTCATGAAGTC  
GATAGGAATCAGTGACTACTAACTACGTGCCAGCAGTCGCGGTAATACGTAGGTCACAAG  
CGTTACCCGGTTTTATTGGGCGTAAAGCGTCTGTAGGCGGTTTTTCAAGTCTTATTTTAA  
AGACCCCGGCTCAACCGGGGAAGGGTAGGATACTGAAAGACTAGAGTTATATCGGGGT  
TACTGGAATTTGCAGTGTAGGGGTAAAATCCGTGGATACTGCAAAGAACACCAAGCGCGA  
AGGCGGGTAACCAGGTATGTACTGACGCTCAGAGACGAAAGCTAGGGTAGCCAATCAGAT  
TAGAAACCCTCGTAGTCC

>Otu4173



CCAGCCTACGGGGCGCTCCAGGGACGAATATTCCGCAATGGACGAAAGTCTGACGGAGTG  
ACGCCGCGTGTGGGAAGAAGTCTTTCGGGATGTAAACCACTGTCAGGGGTCACCAAGTAA  
CCGCGTCTAACATGCGCGGAAGTTGAGGAGCCCCAGAGGAAGCCACGGCTAACTTCGTGC  
CAGCAGCCGCGGTAAGACGAAGGTGGCGAGCGTTGTTTCGGAATTACTGGGCTTAAAGCGC  
ACGTAGGCGGCCCTGTTAAGTGCTTTGTGAAAGCCCTCGGCTCAACCGAGGATCTGCTTGG  
CATACTGGCAGGCTTGAGGCAGGTATGGGCGAGAGGAACCTTGGTGGAGCGGTGAAATG  
CGTAGATATCAAGAGGAACGCCGGTGGTGAAGACGTCTCGCTGGGCCTGTCCTGACGCTG  
AGGTGCGAAAGCCAGGGGAGCAAACGGGATTAGAAACCCGCGTAGTCC

>Otu4174

CCAGCCTATGGGGGGCTGCAGTGGGGAATTTTTCGCAATGGGCGAAGGCCTGACGCAGCA  
ACGCCGCGTGTGTGATGAAGGTCTTCGGATCGTAAAGCACTGTCGCGGGGGAAGAAACCT  
GACGGTACCCCGAGAGGAAGCACCGGCTAACTCTGTGCCAGCAGCCGCGGTAATACAGAG  
GGTGCAGAGCGTTGTTTCGGAATTATTGGGCGTAAAGCGCTGGTAGGTGGCTCTCCAAGTCG  
CGTGTGAAATCTTCCGGCTCAACCGGAAAAAGTGCAGCGGAACTGTGGAGCTTGAGTGCC  
GGAGAGGGTTCGCGGAATTCCCGGTGTAGAGGTGAAATTCGTAGATATCGGGAGGAACACC  
AGAGGCGAAGGCGGCGACCTGGAAGGTAACCTGACACTGAGCAGCGAAAGCGTGGGGAGCA  
AACAGGATTAGAAACCCTAGTAGTCC

>Otu4180

CCAGCCTATGGGATGCTGCAGTAACGAATATTGGGCAATGGGCGAAAGCCTGACCCAGCG  
ACGCCGCGTGTAGGAGGAAGTCCCTCGGGATGTAAACTACTGTCAGGGTGAAGAAAGACC  
GCAAGGTTTGATCTAACCCAGAGGAAGCAACGGCTAACTTCGTGCCAGCAGCCGCGGTAA  
TACGAAGGTTGCGAGCGTTGTTTCGGAATCACTGGGCTTAAAGCGCATGTAGGCGGATGAG  
TAAGCGTTTTGTGAAATCCCTCGGCTTAACCGAGGAATTGCTTGCGGAACCTGCTCATCTT  
GAGGCAAGTAGGGGTGCATGGAACCTCTTGGTGGAGCGGTGGAATGCGTAGATATCAAGAG  
GAACGCCAATGGTGAAAACAGTGCCTGGGCTTGTCTGACGCTGAGATGCGAAAGCGTG  
GGGAGCGAACGGGATTAGAAACCCAGTAGTCC

>Otu4181

CCAGCCTATGGGTTGCAGCAGTAAGGAATATTGGTCAATGGACGCAAGTCTGAACCAGCC  
ATGCCGCGTGAAGGATGAAGGCCCTCTGGGTTGTAAACTTCTTTTATCTGGGACGAAAAA  
AGGGCATTCTTGCTCACTTGACGGTACCAGAGGAATAAGCACCGGCTAACTCCGTGCCAG  
CAGCCGCGGTAATACGGAGGGTGCAAGCGTTATCCGGATTTACTGGGTTTAAAGGGTGCG  
TAGGTGGGTAATTAAGTCAGCGGTGAAATCTTCGAGCTTAACCTCGGAACTGCCATTGAT  
ACTATTTATCTTGAATATCCTGGAGGTAAGCGGAATATGTCGTGTAGCGGTGAAATGCTT  
AGATATGACATAGAACACCCATTGCGAAGGCAGCTCACTACGGGATTATTGACACTGAGG  
CACGAAAGCGTGGGGATCAAACAGGATTAGAGACCCGCGTAGTCC

>Otu4182

CCAGCCTACGGGGGGCTGCAGTTTGGGAATATTCCGCAATGGGCGAAAGCCTGACGGAGTG  
ACGCCGCGTGAGGGATGAAGGCCTTCGGGTGTAGACCTCTTTTGTCCGTTAGAAAGAGC  
CTCGGAGATAATATCTCCGGGATCTGATAAAGGCGGGTGAATAAGCACCGGCTAACTCTG  
TGCCAGCAGCCGCGGTAATACAGAGGGTGCAAACGTTGTTTCGGTGTCAATTGGGCTTAAAG  
GGTGCCTAGGCGGTCTGTCAAAGTTGGGTGTGAAAGCCCTGGCTTAACCAGGGAATTGCG  
CCCAATACTACACGACTCGAGGGTCAAAGGGGAGAGCGGAACTCCAGGTGTAGCGGTAAA  
ATGCGTAGATATCTGGGGGAACGCCGATGGTGAAGACAGCTCTCTGGGTGACTCCTGACG  
CTGAGTGCACGAAAGCTGGGGGAGCAAACAGGATTAGAGACCCGAGTAGTCC

>Otu4183

CCAGCCTATGGGTTGCACCAGCAACGAATCTTCCCCAATGCCGGAACGGTGAGGGAGCG  
ACGCCGCGTGAAGGACGAAGTTCTTCGGAATGTAAACTTCTGTAAGGATCATGAAAGCTG  
AGGACCTAATACGTCTAGAGGTTGATCAGGTCCCTAAAAGGGGCGGCTAACTCTGTGCCA  
GCAGCCGCGGTAATACAGAGGCCCAAGCGTTACTGAGAATCACTGGGTTTAAAGGGTGC  
GTAGGTGGCGCGTTAAGTCCGTTGTGAAATCCCTTGGCTCAACCAAGGAATGGCTTCGGA  
TACTGGCGCGCTTGAGGCCGGTAAGGGTCACTGGAACCTGACGGTGGAGCGGTGAAATGCG  
TAGATATCGTCAGGAACGCCAATGGTGAAGACAGGTGACTGGGCCGGTTCTGACACTGAG  
GCACGAAAGCGTGGGGAGCGAACGGGATTAGAAACCCAGTAGTCC

>Otu4184

CCAGCCTATGGGTGGCACCAGTAAGGGATATTGCGCAATGGGCGAAAGCCTGACGCAGCA  
ACGCCGCGTGAAGGATGAAGGCCTTCGGGTGTAAACTTCTTTGGCCGGGGACGAGCAAG  
GACGGTACCCGGACAACGAGTCACGGCTAACTACGTGCCAGCAGCCGCGGTAAAACGTAG  
GTGGCGAGCGTTATCCGGATTTACTGGGTGTAAAGCGCATGCAGGCGGCTCGTTAAGTTG

GGTGTGAAAGCTTCCGGCTCAACTGGGAGAGGTTGCTCAAGACTGGCGAGCTAGAGAGTG  
GTAGGGGAAGGCGGAATTCCGGGTGTAGTGGCGAAATGCGTAGAGATCCGGAGGAACACC  
AGTGGCGAAGGCGGCCTTCTGGGCCGCGACTGACGCTCAGATGCGACAGCTAGGGGAGCA  
AACGGGATTAGAAACCCTTGTAGTCC

>Otu4185

CCAGCCTATGGGGCGCAGCAGTGGGGAATATTGGGTAAATGGGCGAAAGCCTGACCCAGCG  
ACGCCGCGTGGGGGATGAAGGCCTTCGGGTGTAAACCCCTGTCAGGGGAGACGAAAGTC  
TCGCGGTGAATAGCCGCGAGATCTGACGGTACCCCCAAAGGAAGCCCCGGCTAACTCCGT  
GCCAGCAGCCGCGTAATGCGGAGGGGGCGAGCGTTATTCGGAATTACTGGGCGTAAAGC  
GCGCGCAGGTGGCGCGTAAGTGGCAGGTGAAAGCCCTCGGCTCAACCGAGGAACTGCCT  
GCCAACTGCTGCGCTTGAGGCCGGGAGGGGAGAGTGGAAATTCCTGGTGTAGCGGTGAAA  
TGCGTAGATACCAGGAGGAACACCGGTGGCGAAGGCGGCTCTCTGGACCGGTTCTGACGC  
TCATGCGCGAAAGCGTGGGGAGCAAACAGGATTAGATACCCTCGTAGTCC

>Otu4194

CCAGCCTACGGGTCGCGAGCAGTGGGGAATTTTGGACAATGGGGGCAACCCTGATCCAGCA  
ATGCCGCGTGTGTGAAGAAGGCCTTCGGGTGTAAAGCACTTTTGTGAGGAACGAAACGG  
TCAAGGCTAATACCCTGGGCTAATGACGGTACCTGAAGAATAAGCACCGGCTAACTACGT  
GCCAGCAGCCGCGTAATACGTAGGGTGCAAGCGTTAATCGGAATTACTGGGCGTAAAGC  
GTGCGCAGGCGGTTATACAAGACAGATGTGAAATCCCCGGGCTCAACCTGGGAATTGCAT  
TTGTGACTGTATGGCTAGAGTGTGTGAGAGGGGGGTAGAATTCACGTGTAGCAGTGAAA  
TGCGTAGAGATGTGGAGGAATACCGATGGCGAAGGCAGCCCCCTGGGATAACACTGACGC  
TGAGGCGCGAAAAGTGTGGGTAGCAAACAGGATTAGATACCCTCGTAGTCC

>Otu4197

CCAGCCTATGGGTGGCTCCAGTGGGGAATCTTGACACAATGGGGGAAACCCTGATGCAGCG  
ACGCCGCGTGAGCGATGAAGCCCTTAGGGTGTAAAGCTCTTTTGGCGGGGACGATAATG  
ACGGTACCCGCGAGAATAAGCCCCGGCTAACTTCGTGCCAGCAGCCGCGGTAATACGAAGG  
GGGCTAGCGTTGTTTCGGAATCACTGGGCGTAAAGCGCACGCAGGCGGATTGATAAGTCAG  
GGGTGAGATCCCGGGGCTCAACCTCGGAATTGCCTTTGATACTGTCTGTCTTGAGTTCGG  
GAGAGGTTGGCGGAATTCCTAGTGTAGAGGTGAAATTCGTAGATATTAGGAAGAGCACCA  
GTGGCGAAGGCGGCCAACTGGCCCCGACACTGACGCTCATGTGCGAAAGCGTGGGGAGCAA  
ACAGGATTAGATACCCCAGTAGTCC

>Otu4198

CCAGCCTACGGGTCGCTCCAGCAACGAATCTTCCCCAATGCCGGAACGGTGAGGGAGCG  
ACGCCGCGTGAGGATGAAGTCTTTCGAGATGTAAACTCCCGTTAGGGTTACGAAAGCAA  
TGCGCGTGAATAATGCGCAAAGTTGATCTAGCCCAAAGAAAGGGGCGGCTAACTCTGTGC  
CAGCAGCCGCGTAATACAGAGGCCCAAGCGTTACTGAGAATCACTGGGTTTAAAGGGT  
GCGTAGGTGGCGCGTTAAGTCCGTTGTGAAATCCCCTGGCTCAACCAGGGAAGTGCCTCG  
GATACTGGCGTGCTTGAGGCCGGTAGGGGTCACTGGAACAGACGGTGGAGCGGTGAAATG  
CGTAGATATCGTCTGGAACGCCGGTGGTGAAGACGGGTGACTGGGCCGGTTCTGACACTG  
AGGCACGAAAGCGTGGGGAGCGAACGGGATTAGAAACCCTCGTAGTCC

>Otu4199

CCAGCCTACGGGTTGCTGCGAGTGGGGAATCTTGCGCAATGGGCGAAAGCCTGACGCAGCG  
ACGCCGCGTGTGCGATGAAGGTCTTCGGATCGTAAAGCACTGTGCGGGGGGACGAAAACC  
GACGGTACCCCGAGAGGAAGCACCGGCTAACTCTGTGCCAGCAGCCGCGGTAATACAGAG  
GGTGCAGAGCGTTGTTTCGGAATTATTGGGCGTAAAGCGCTTGTAGGCGGCGTGTCAAGTCG  
CGTGTGAAAGCCCCGGGCTCAACCCGGGAAGTGCGCGCGAAACTGGCAGGCTCGAGTCCC  
GGAGAGGGTCGCGGAATTCCCGGTGTAGAGGTGAAATTCGTAGATATCGGGAGGAACACC  
AGAGGCGAAGGCGGCGACCTGGAAGGAGACTGACGCTGAGAAGCGAAAGCGTGGGGAGCA  
AACAGGATTAGATACCCCGGTAGTCC

>Otu4202

CCAGCCTATGGGTGGCAGCAGCAACGAATCTTCCCCAATGGGCGAAAGCCTGAGGGAGCG  
ACGCCGCGTGAAGGACGAAGTTCTTCGGAATGTAAACTTCTGTTAGGGTTATGAAAGCGA  
CCGCGCCTAATACGCGCGGAAGTTGATCTGACCCAGGGAAAGGGACGGCTAACTCTGTGC  
CAGCAGCCGCGGTAATACAGAGGTCCCAAGCGTTACTGAGAATCACTGGGTTTAAAGGGT  
GCGTAGGTGGTCCGTTAAGTCCGTTGTGAAATCCCTTGGCTCAACCAAGGAAGTGCCTTCG  
GATACTGGCGGACTTGAGGCCAGTAGAGGTCACTGGAAGTACGGTGGAGCGGTGAAATG  
CGTAGATATCGTCAGGAACGCCGGTGGTGAAGACGGGTGACTGGGCTGGTTCTGACACTG  
AGGCACGAAAGCGTGGGGAGCGAACGGGATTAGAAACCCTTGTAGTCC

>Otu4204

CCAGCCTATGGGGTGCTGCAGTCGAGAATTTTTCTCAATGGGGGAAACCCTGAAGGAGCG  
ACGCCGCGTGAGGATGAAGGTCTTCGGATTGTAACTCCTGTCATTGAAGAACAAAGTA  
CGTAAGTTAACTGCTTATGTGCCGATAGTACTCGAAGAGGAAGGGACGGCTAACTCTGTG  
CCAGCAGCCGCGGTAATACAGAGGTCCCAAGCGTTGTTTCGGATTTCATTGGGCGTAAAGGG  
AGCGTAGGTGGTCGGGTAAGTCAGATGTCAAATATCGATGCTCAACGTCGAATCGCATTT  
GATACTGCCTGGCTAGAGGAATTGAGAGGAGGCCGGAATTCACGGTGTAGCAGTGAAATG  
CGTAGATATCGTGAGGAAGACCAACGGCGAAAGCAGGCCTCTGGAAATCTCCTGACACTG  
AGGCTCGAAGGCCAGGGGAGCAAACGGGATTAGAGACCCGTGTAGTCC

>Otu4208

CCAGCCTATGGGGGGCTGCAGCTAAGAATATTCACAATGGGAGCAATCCTGATGGAGCG  
ACGCCGCGTGTATGAAGAAGACAGAAATGTTGTAAAGTACTTTTATACGGGAAGAATAAG  
AGTAGTGAGAGAAACGTTACTTGATGACGGTACCGTATGAATAAGCCACGGCTAACTACG  
TGCCAGCAGCCGCGGTAATACGTAGGTGGCAAGCGTTGTTTCGGATTTATTGGGCGTAAAG  
GGCATGTAGGCGGTAAGATAAGTGTGAATTGAAATACCGAGGCTTAACCTCGCGTTTGGT  
TTGCAAACCTGTCTTGCTAGAGTGCAGAATGGGAACTGGAATTCCGCGTGTAGGGGTGAA  
ATCTGTAGATATGCGGAAGAATACTTGTGGCGAAGGCGAGTTTCTGGTCTGTAAGTGACG  
CTGAAATGCGAAAGTGCGGGGAGCAAACAGGATTAGATACCCCAGTAGTCC

>Otu4210

CCAGCCTACGGGTCGCTGCAGTGAGGAATTTTGCGCAATGGCCGCAAGGCTGACGCAGCA  
ACGCCGCGTGGGTGAAGAAAGCCTTCGGGTCGTAAAGCCCTGTCGGGTGGGAAGAACTGC  
TCGGGGATGAATAATCTTCGGGCTTGACGGTACCACCAAAGGAAGCACC GGCTAACTCCG  
TGCCAGCAGCCGCGGTAATACGGAGGGTGCAAGCGTTATTCGGAATTACTGGGCGTAAAG  
CGCGTGCAAGGCGGGCCTGCAAGTCTGATGTGAAAGCCCTGGGCTCAACCTGGGAAGTGCA  
TTGGAACCTGTGGGTCTTGAGTTCTGGAGAGGAAGGGGAATTCCCGGTGTAGAGGTGAA  
ATTCGTAGATATCGGGAGGAATACCAGTGGCGAAGGCGCCCTTCTGGACGGCAACTCACG  
CTGAGACGCGAAAGCGTGGGGAGCAAACAGGATTAGATACCCTAGTAGTCC

>Otu4211

CCAGCCTATGGGAGGCAGCAGTAAGGAATATTGGTCAATGGACGCAAGTCTGAACCAGCC  
ATGCCGCGTGAGGATGAAGGCCCTCTGGGTTGTAAACTTCTTTTATCAGCGAAGAAACC  
CTTGTTTTTATACTGAGGTTGACGGTACCTGATGAATAAGCACC GGCTAACTCCGTGCCAG  
CAGCCGCGGTAATACGGAGGGTGCAAGCGTTATCCGGATTCACTGGGTTTAAAGGGTGCG  
TAGGTGGGTTTGTAAAGTCAGTGGTGAAATCTCCAAGCTTAACCTGGAACTGCCGTTGAT  
ACTATAGATCTTGAATCTCGTGGAGGTAAGCGGAATATGTCATGTAGCGGTGAAATGCTT  
AGATATGACATAGAACACCGATAGCGAAGGCAGCTTACTACACGAGTATTGACACTGATG  
CACGAAAGCGTGGGGATCAAACAGGATTAGAGACCCTTG TAGTCC

>Otu4212

CCAGCCTATGGGGGGCAGCAGTAAGGAATATTGGGCAATGGGCGCAAGCCTGACCCAGCC  
ATGCCGCGTGCAAGATTGACGGCCCTATGGGTTGTAAACTGCTTTTGTACGGGAAAAAAC  
CCCCGGTTCGTGTACCGGGGCTGATGTTACCGTAAGAATAAGCATCGGCTAACTCCGTGCC  
AGCAGCCGCGGTAATACGGAGGATGCAAGCGTTATCCGGATTTCATTGGGTTTAAAGGGTG  
CGCAGGCGGAGCAATAAGTCAGTGGTGAAAGCCTACAGCTTAACTGTAGAATTGCCATTG  
ATACTGTTGTTCTTGAGTATAGTTGGAGTGGGCGGAATGTATCATGTAGCGGTGAAATGC  
TTAGATATGATACAGAACACCAATCGCGAAGGCAGCTCACTAACTATAACTGACGCTCA  
TGCACGAAAGCGTGGGGAGCAAACAGGATTAGAAACCCCAGTAGTCC

>Otu4217

CCAGCCTACGGGGGGCAGCAGTTAAGAATCTTGCAACAATGGGCGCAAGCCTGATGCAGCG  
ACGCCGCGTGAATGATGAAGGCCCTTCGGGTTGTAAAGTTCAGTAAGCAGGGAAGAATAAG  
CAAGAGGTAATATTTCTTGTGATGACGGTACCTGCCTAAAGCCCCGGCTAACTACGTGCC  
AGCAGCCGCGGTAATACGTATGGGGCGAGCGTTGTTTCGGAATTATTGGGCGTAAAGGGCG  
TCTAGGCGGGAAATTAAGTTAGGTGTGAAAGCTATGGGCTCAACCCATAAACTGCATCTA  
AAACTGATTTTCTTGAGTTCTGGGAGAGGAGAGCGGAATTCAGGTGTAGCGGTGAAATGC  
GTAGATATCTGGAAGAACACCAAGTGGCGAAGGCGGCTCTCTGGCCTAGAACTGACGCTGA  
AGCGCGAAAGCGTGGGGAGCGAACAGGATTAGATACCCCTGTAGTCC

>Otu4218

CCAGCCTACGGGGGGCAGCAGGGAGGAATATTGGGCAATGGGGGAAACCCTGACCCAGCA  
ACGCCGCGTGAAGGAAGAAGGCCCTTCGGGTTGTAAACTTCTGTGACGGGGGACGAAAGAA  
ATGACGGTACCCCGAGAGGAAGCCACGGCAAACCTACGTGCCAGCAGCCGCGGTAATACGT

AGGTGGCGAGCGTTGTCCGGAATCACTGGGCGTAAAGGGCGCGTAGGCGGCGCTTCAAGT  
CGCATGTGAAAAACCAGGGCTTAACCTCTGGGGGGTCATGCGAAACTGGAGTGCTTGAGTG  
CGGTAGAGGAAAGCGGAATTCCTGGTGTAGCGGTAAAATGCGTAGAGATCAGGAGGAACA  
CCGGTGGCGAAGGCGGCTTTCTGGGCCGCAACTGACGCTGAGGCGCGAAAGCGTGGGGAG  
CAAACAGGATTAGATACCCCAGTAGTCC

>Otu4221

CCAGCCTACGGGTTGCACCAGTCGAGAATATTCCACAATGGACGAAAGTCTGATGGAGCG  
ACGCCGCGTGCGGGATGAAGGCCCTTGGGTTGTAAACCGCTCTTGTAAGTGAAAAATTC  
GATGATGGTAGCTTACGAATAAGAGGTTACTAACTCTGTGCCAGCAGTAGCGGTAATACA  
GAGACCTCAAGCGTTATCCGGATTTATTGGGCGTAAAGAGCTGGTAGGTGGTTATATTAG  
TCAGATGTCAAATCTCGGAGCTTAACTCTGAACTGCATTTGAAACGGTATAACTCGAGG  
GTGTGAGAGATCTATGGAATCATGGTGTAGCAGTGAAATGCGTTGATATCATGAGGAAC  
ACCAAAGGCGAAGGCATTAGATTGGCTCACTCCTGACACTGAGCAGCGAAAGCGTGGGTA  
GCGAATGGGATTAGATACCCCAGTAGTCC

>Otu4222

CCAGCCTATGGGGGGCAGCAGTAGGGAATTTTCCACAATGGGCGAAAGCCTGATGGAGCA  
ACGCCGCGCGCAGGATGAAAGCCTTCGGGTTGTAAACTGCTTTTATGTGCGAAGAATTTG  
ACGGTAACACATGAATAAGGGTCGGCTAACTACGTGCCAGCAGCCGCGGTCATACGTAGG  
ACCCAAGCGTTATCCGGATTTACTGGGCGTAAAGAGTTGCGTAGGTGGTTTTTTAAGTGG  
AGCGTGAAAGCGTGTGGCTCAACCATAACAGCTGCGTTCCAAACCTGATTAACCTTGAGTGCG  
AGAGAGGTAGATGGAATTTCTAGTGTAGGAGTGAAATCCGTAGATATTAGAAGGAACACC  
GATGGCGTAGGCAGTCTACTGGCTCGTTACTGACACTAAGGCACGAAAGCGTGGGGAGCA  
AACGGGATTAGAAACCCCTGTAGTC

>Otu4225

CCAGCCTATGGGGCGCTGCAGTGGGGAATTTTGCGCAATGGGGGAAACCCTGACGCAGCA  
ACGCCGCGTGAGGATGAAGTCCTTCGGGACGTAAACTCCTTTTCGATCGGGACGATAATG  
ACGGTACCGGAAGAAGAAGCCCCGGCTAACTTCGTGCCAGCAGCCGCGGTAATACGAGGG  
GGGCGAGCGTTGTTCCGAATTATTGGGCGTAAAGGGCGCGTAGGCGGTGCGGTAAGTCAC  
CTGTGAAATCCCCAGGCTTAACCTGGGGCCTGCAGGCGAAACTACCGTGCTGGAGGGTGG  
GAGAGGTGCGTGGAATTCCTGGTGTAGCGGTGAAATGCGTAGATATCGGGAGGAACACCT  
GTGGCGAAAGCGGCGCACTGGACCACTACTGACGCTGAGGCACGAAAGCTAGGGGAGCAA  
ACAGGATTAGATACCCCAGTAGTCC

>Otu4227

CCAGCCTACGGGGGGGCTGCAGTGAGGAATATTGGTCAATGGATGCAAGTCTGAACCAGCC  
ATGCCGCGTGAGGATGACTGCCCTATGGGTTGTAAACTTCTTTTGTAGAAGGCGAAACG  
CATGTCTTGAACATGAACTGACGGTACTCTACGAATAAGCATCGGCTAACTCCGTGCCAG  
CAGCCGCGGTAATACGGAGGATGCGAGCGTTATCCGGATTTATTGGGTTTAAAGGGTTTCG  
TAGGCGGCTTTATAAGTCAGCGGTGAAATACCAGAGCTTAACTCTGGGGCTGCCGTTGAT  
ACTGTTAAGCTTGAGTAGGATCGACGATGGCGGAATGAGACAAGTAGCGGTGAAATGCAT  
AGATATGTCTCAGAACACCGATAGCGTAGGCAGCTGTCGAGGTCATCTACTGACGCTGAG  
GAACGAAAGCGTGGGGATCAAACAGGATTAGATACCCGAGTAGTCC

>Otu4228

CCAGCCTACGGGGGGCAGCAGCAGGGAATTTTGCGCAATGGACGAAAGTCTGACGCAGCA  
ACGCCGCGTGAGTGATGAAGGCCCTTCGGGTTGTAAAGCTCTGTGCTTCGGGACGAAAATC  
CAGTCGGTGAATAGCCGATTGGACTGACGGTACCGAAAAAGGAAGCACCGGCTAACTCCG  
TGCCAGCAGCCGCGGTAATACGGAGGGTGCAAGCGTTGCTCGGAATTATTGGGCGTAAAG  
GGCAGGTAGGTGGTCTCGTTTGTCTGGGGTGAAAGCCTTGAGCTTAACTCAAGTAGTGCC  
CCAGAAACGGCGAGACTAGAGTATTGGAGAGGGTCTGGAATTCCCGGTGTAGCGGTGAA  
ATGCGTAGAGATCGGGAGGAACACCAAGTGGCGAAGGCGGCGACCTGGACAATTACTGACA  
CTCAACTGCGAAAGCGTGGGTAGCAAACAGGATTAGAGACCCGCGTAGTCC

>Otu4230

CCAGCCTATGGGGCGCAGCAGTGAGGAATATTGGGCAATGGGCGCAAGCCTGATCCAGCC  
ATGCCGCGTGAGTGATGACGGCCTTAGGGTTGTAAAGCTCTTTCACCCACGACGATAATG  
ACGGTAGTGGGAGAAGAAGCCCCGGCTAACTACGTGCCAGCAGCCGCGGTAATACGTAGG  
GGGCAAGCGTTGTTCCGATTCATTGGGCGTAAAGGGCATGTAGGCTGTTATGTAAGTGTG  
GATTTAAAGGCGGAGGCTTAACCTCTAGTTTGGTCTGCAAACCTGCGTAGCTTGAGTGTAG  
AAGGGGAAACTGGAATTCGCGGTGTAGGGGTGAAATCTGTAGATATGCGGAAGAATACCT  
GTGGCGAAGGCGAGTTTCTGGTCTATAACTGACGCTGAAATGCGAAAGTGTGGGTAGCAA

ACAGGATTAGAGACCCCCGTAGTCC

>Otu4237

CCAGCCTATGGGGGGCTGCAGTAGGGAATATTGCGCAATGGAGGAACTCTGACGCAGCG  
ACGCCGCGTGGGTGATGAAGGCCTTCGGGTCTGTAAAGCCCTGTCGGAAGGGAAGAAAAAT  
ATCTGGGATAACACCCCAGATACTTGACGGTACCTTCAGAGGAAGCACCGGCTAACTACG  
TGCCAGCAGCCGCGGTAATACGTAGGGTGTAGCGTTGTTTCGGAATCACTGGGCGTAAAG  
CGCGTGTAGGTCTTTAGTTAAGTCGGGTGTGAAATCCCTGGGCTCAACCGAGGAAGTGCA  
TCCGAACTAACTAGCTAGAGAATGGTAGAGGAAGGTGGAATTCCTAGTGTAGAGGTGAA  
ATTCGTAGATATTAGGAGGAATACCGGTGGCGAAGGCGGCCTTCTGGACCATTCTGACA  
CTGAGACGCGAAAGCGTGGGGAGCAAACAGGATTAGAAACCCTAGTAGTCC

>Otu4239

CCAGCCTATGGGTGGCACCAGTGGGGAATATTGGACAATGGGCGCAAGCCTGATCCAGCA  
ATGCCGCGTGTGTGAAGAAGGCCTGCGGGTCTGTAAAGCACTTTAAGCAGGAAAGAAGGGT  
GGGGTGTGTATAGCACTTTGCATTGACGTTACCTGCAGAATAAGCACCGGCTAACTCCGT  
GCCAGCAGCCGCGGTAATACGGAGGGTGCAGCGTTAATCGGAATTACTGGGCGTAAAGC  
GCGCGTAGGCGGTTTGATCAGTCTGAGGTGAAAGCCCTGGGCTTAACCTGGGAATGGCCT  
TGAAACTGTCAAGCTGGAGTGTGGGAGAGGGGCGTGGAATTTCCGGTGTAGCAGTGAAA  
TGCGTAGAGATCGGAAGGAACACCAGTGGCGAAGGCGGCGCTCTGGCCCAACACTGACGC  
TGAGGTGCGAAAGCGTGGGGAGCAAACAGGATTAGAAACCCAGTAGTCC

>Otu4241

CCAGCCTACGGGTTCGAGCAGTAACGAATATTGGGCAATGGGCGAAAGCCTGACCCAGCG  
ACGCCGCGTGTGGGAAGAAGTTCTTCGGAATGTAAACCACTGTCAGGGGTTACCAAGCGA  
GTACGTCGAATAGGCGTGCAGATTGAGGCGCCCCAGAGGAAGCAACGGCTAACTTCGTGC  
CAGCAGCCGCGGTAATACGAAGGTTGCGAGCGTTGTTTCGGAATCACTGGGCTTAAAGAGC  
ACGTAGGCGGCCCATCAAGTGCCTTGTGAAATCCCACGGCTCAACCGTGGAGCTGCTTGG  
CATACTGTTTCGGGCTTGAGGCAGGTAGAGGCGCGTGGAACCTCTTGGTGGAGCGGTGGAAT  
GCGTAGATATCAAGAAGAACGCCGGAGGCGAAAGCGATGCGCTGGGCTGTCCTGACGCT  
GAGGTGCGAAAGCCAGGGGAGCAAACGGGATTAGAAACCCCTGTAGTCC

>Otu4242

CCAGCCTACGGGTTGCAGCAGTAGGGAATATTGGTCAATGGGGGCAACCCTGAACCAGCC  
ATGCCGCGTGCAGGAAGAAGGCGTTATGCGTTGTAAACTGCTTTTGACAGGGAATAAAAA  
GGCCATGCGTGGCAAATTGAATGTACCTGTAGAATAAGCCACGGCTAACTACGTGCCAGC  
AGCCGCGGTAATACGTAGGTGGCGAGCGTTATCCGGATTTATTGGGTTTAAAGGGAGCGT  
AGGCGGTTTTGTAAAGTCAGTGGTGAAGTCGGCCGCTTAACGGTTGGAATGCCATTGATA  
CTGCAGAGCTAGAGTATAGTATAGGTAGGGAGAATTGACGGTGTAGCGGTGAAATGCATA  
GATATCGTCAAGAATACCGATTGCGAAGGCACCTTACTGGACTATAACTGACGCTGAGGC  
TCGAAAGTATGGGAATCAAACAGGATTAGATACCCTCGTAGTCC

>Otu4244

CCAGCCTACGGGGTGCTCCAGTAACGAATCTTCCGCAATGCACGAAAGTGTGACGGAGCG  
ACGCCGCGTGTGGGACGAAGTTCTTCGGAATGTAAACCACTGTCAGGGGAAAGAAAGTTC  
TGATCTACCCCAGAGGAAGAGACGGCTAACTCTGTGCCAGCAGCCGCGGTAAGACAGAGG  
TCTCGAGCGTTAGGCGGAATCACTGGGCTTAAAGCGTGTGTAGGCGGATGTCTAAGTACC  
TTGTGAAATCCCACGGCTCAACCGTGGAACTGCTTGGTATACTGGATGTCTTGAGCCATC  
TAGGGGCAACTGGGACAAACGGTGGAGCGGTGAAATGCGTAGATATCGTTTGGAACGCCA  
AAGGTGAAAACAAGTTGCTGGGGATGTGCTGACGCTGAGACACGAAAGCCAGGGGAGCAA  
ACGGGATTAGAAACCCAGTAGTCC

>Otu4248

CCAGCCTACGGGGGGCACCAGTGAGGAATCTTCGTCAATGGGCGCAAGCCTGAACGAGCG  
ACGCCGCGTGCGGGAAGACGCATTTCCGTGTGTAAACCGCTTTTCTTGGGGACGAGAAGG  
GACGGTACCCAAGGAATAAGCATCGGCTAACTACGTGCCAGCAGCCGCGGTAATACGTAG  
GATGCGAGCGTTGTCCGGAGTTACTGGGCGTAAAGCGTGTGCAGGCGGTGTCTGCGTCT  
GGGGTGAATCTCCCGGCTTAACTGGGAGGGTGCCACGGATACGAGGCGACTTGAGGACT  
TGAGAGGGAAGTAGAACTCCCGGTGGAACAGTGAATGTGTAGAGATCGGGAAGAATACC  
AGAGGGGAAGCCGGCTTCTTGGCAAGTATCTGACGCTCAGCCACGAAAGCTTGGGGAGTA  
AACAGGATTAGATACCCGGGTAGTCC

>Otu4251

CCAGCCTACGGGAGGCACCAGCCAAGAATCTTCCGCAATGGGGGAAACCCTGACGGAGCG  
ACGCCGCGTGAAGGAAGAAGGTCTTCGGATTGTAAACTTCTTTTGTAAAGGAAGAATAAG

TTTGCAGAGAAAATGCGCAGATGATGACGGTACTTTATGAATAAGCCCCGGCTAATTACGT  
GCCAGCAGCCGCGGTAATACGTAAGGGGCGAGCGTTACTCGGAATTACTGGGCGTAAAGG  
GCGTGTAGGCGGTTTTTACAAGTCTAATGTAAAAAACACGGCTTAACCGTGGGGCTGCGT  
TAGAAACTGTAAAGACTTGAGTCTGGTGGAGGGCAATGGAATTCCTGGTGTAGCGGTGAAA  
TGCGTAGATATCGGGAAGAACACCGAAGGCGAAAGCAGTTGTCTATGCCAAGACTGACGC  
TGAGGCGCGAAAGCATGGGGATCAAACAGGATTAGAGACCCTAGTAGTCC

>Otu4253

CCAGCCTATGGGAGGCAGCAGTGGGGAATATTGGACAATGGGGGCAACCCTGATCCAGCC  
ATGCCGCGTGTGTGAAGAAGGCCTTCGGGTGTAAAGCACTTTCAGTGGGGAGAAAGGTT  
TGTCACCTAATACGTGACGAAATTGATGCTACCCACAGAAGAAGCACCGGCTAACTCCGT  
GCCAGCAGCCGCGGTAATACGGAGGGTGCAAGCGTTAATCGGAATTACTGGGCGTAAAGC  
GCACGTAGGTGGTTTTTTTAAAGCCAGCTGTGAAATCCCCGGGCTCAACCTGGGACTTGCG  
TTGGTACTGGAAAGCTAGAGTAGGGTAGAGGGGTGTGGAATTCAGGCGTAGCGGTGAAA  
TGCGTAGATATCTGGAGGAACATCAGTGGCGAAGGCGACACCCTGGACTCATACTGACAC  
TGAGGTGCGAAAGCGTGGGGAGCAAACAGGATTAGATACCCCTGTAGTCC

>Otu4254

CCAGCCTACGGGATGCTGCAGTAAGGAATATTGGACAATGGTGGCAACACTGATCCAGCC  
ATGCCGCGTGCAGGATGAAGGCGCTACGCGTTGTAAACTGCTTTTGTACGGGAGAAAACC  
CTCGCTCGTGAGCGAGGCTGATAGTACCGTAAGAATAAGCATCGGCTAACTTCGTGCCAG  
CAGCCGCGGTAACACGTAGGAGGCAAGCGTTATCCGGATTTATTGGGTTTAAAGGGTGCG  
TAGGCGGATTAATAAGTCAGTGGTGAAAACCTTCAGCTTAACTGGAGACTTGCCATTGAT  
ACTGTTAGTCTTGAGTACGGTCAAGGTAGGCGGAATGTGTAATGTAGCGGTGAAATGCTT  
AGATATTACACAGAACACCGATTGCGAAGGCAGCTTGCTGGGCCATTACTGACGCTGATG  
CACGAAAGCGTGGGGAGCAAACAGGATTAGATACCCGCGTAGTCC

>Otu4259

CCAGCCTACGGGTTGCAGCAGTTTCGAATCATTACAAATGGGCGAAAGCCTGATGGTGCG  
ACGCCGCGTGGAGGATGAAGGTTTTTCGGATTGTAAACTCCTGTCACTGCAGAACAAGGCC  
GGGCGATTGAATATTTTCGTCCGGTTGATGGTATGCGGAGAGGAAGGGACGGCTAACTCTG  
TGCCAGCAGCCGCGGTAAGACGGAGGTCCCGAGCGTTGTTTCGGATTTCATTGGGCGTAAAG  
GGTGTGTAGGAGGTCGGGTAAGTCAGGTGTGAAATCTCACAGCTTAACTGTGAAACTGCG  
CTTGATACTGCCCGGCTAGAGGATCGGAGGGTGTAACGGAATTTATGGTGTAGCAGTGAA  
ATGCGTAGATATCATAAGGAACACCGGTGGCGAAGGCGGTTACCTGGAAGATTCTCTGACT  
CTGAAACACGAAAGCCAGGGGAGCAAACGGGATTAGAAACCCAGTAGTCC

>Otu4261

CCAGCCTATGGGACGCTCCAGTCGAGAATCTTCCACAATGGACGAAAGTCTGATGGAGCG  
ACGCCGCGTGATTGATGAAGTCCTTCGGGACGTAAAGATCTTTTATGAGGGAAGAAGTTT  
ATTGACGGTACCTCATGAATAAGGGGCTCCTAATCTCGTGCCAGCAGGAGCGGTAATACG  
AGAGCCCCGAGCGTTATCCGGAATTATTGGGCGTAAAGGGTGTGTAGGCGGTTGTATTAG  
TCGTGTGTCAAACTCCAGCTTAACTGGGAATCGGCATACGAAACGGTACGACTTAGAA  
TGAAGGAGAGGTGTGCGGAATCATGGTGTAAAGGTGAAATCCGTTGATATCATGGGGAA  
CACCAAATGCGAAAGCAGCACACTGGCCTTTTATTGACGCTGAGACACGAAAGCGTGGGT  
AGCGAATGGGATTAGATACCCCTCGTAGTCC

>Otu4263

CCAGCCTACGGGGGGCAGCAGTAGGGAATCTTCCACAATGGGCGAAAGCCTGATGGAGCA  
ACGCCGCGTGTAGGATGAAGGCCCTCGGGTCGTAAACTGCTTTTATCTGTGACGAATATG  
ACGGTAGCAGATGAATAAGGATCGGCTAACTCCGTGCCAGCAGCCGCGGTCATACGGAGG  
ATCCAAGCGTTATCCGGAATCACTGGGCGTAAAGAGTTGCGTAGGTGGCATGATAAGTTG  
GTAGTGCAATCCTGGGGCTCAACCCCTTACCCATTACCAAACTGTCAAGCTAGAGGATG  
AGAGAGGTTATTGGAATTCCTAGTGTAGGAGTGAAATCCGTAGATATTGGGAGGAACACC  
GATGGCGTAGGCAGGCCACTGGCTCATTCTGACGCTCAGGCACGAAAGCGTGGGGAGCG  
ACCGGGATTAGATACCCAGTAGTCC

>Otu4264

CCAGCCTATGGGAGGCAGCAGTGGGGAATATTGGACAATGGGCGCAAGCCTGATCCAGCC  
ACGCCGCGTGGGTGATGAAGGCCCTTCGGGTCGTAAAGCCCTGTGCGAGGGGAAGAAAAGC  
TCGCTGGCTAATATCCAGCGGGCCTTTGACGGTACCCTCAAAGGAAGCACCGGCTAACTC  
CGTGCCAGCAGCCGCGGTAAGACGGAGGGTGCAAGCGTTGCTCGGATTGACTGGGCGTAA  
AGGGCGTGTAGGCGGTTGCCCAAGTCCGATGTGAAAGCCCGGGGCTTAGCCTCGGAAGTG  
CATCGGAAACTAGGCAGCTGGAGCGCGATAGAGGAGGGTAGAATTCCTGGTGTAGCGGTG

AAATGCGTAGATATCAGGAGGAATACCGGCGGCGAAGGCGGCCCTCTGGATCGTTGCTGA  
CGCTGAGACGCGAAAGCGTGCGGAGCAAACAGGATTAGATACCCCTGTAGTCC  
>Otu4269  
CCAGCCTATGGGGGGCTGCAGTGGAGAATATTGATCAATAAACGAGAGTTTGAATTAGTG  
TTTTGCGGGAATGAATGATTCTTAGAATCTCGAAGGCTATGATAGCTGTAAAGTTCTGTCC  
GTCGGTTAGAATAATGACATTAACTGAAAAAGAATCCCGGGCTAACACGTGCCAGCAG  
CTGCGGTAAGACGTTGACGGGGGAGCGTTACTGGTCATTACTAGGCGTAAAGAATGGCTA  
AACGGTTTAAAGAAATTACACTTTAAATCAAAGATATTGTCGAAGGTTTGTGTAACTCTT  
AAGACTTGAGGAGTAAGGAAATTTGCGATAAGTATAATCTAGAGATAAAGTTCTAAAAGA  
TTATAAAGATCTTCAAATGCCATGGCAGCATTTTTATTTATTATCCTAACGCTAAACCACT  
AAAGTATAAAAAATCAATCAGGATTAGAAACCCCACTAGTCC  
>Otu4270  
CCGCCTACGGGGGGCTGCAGTAAGGAATATTGGACAATGGGCGCAAGCCTGATCCAGCCA  
TGCCGCGTGAAGGATGAAGGTCCTCTGGATTGTAACTTCTTTTATAGGGGACGAAAAAA  
GGGTTTGCCAACCCGTCTGGCGGTACCCTATGAATAAGCACCGGCTAACTCCGTGCCAGC  
AGCCGCGGTAATACGGAGGGTGCAAGCGTTATCCGGATTCACTGGGTTTAAAGGGTGCGT  
AGGCGGGTATGTAAGTCAGTGGTGAAATCTTGGGGCTCAACCCCGAAACTGCCATTGATA  
CTATGTATCTTGAATATTGTGGAGGTTAGCGGAATATGTCATGTAGCGGTGAAATGCTTA  
GATATGACATAGAACACCGATTGCGAAGGCAGCTGGCTACACAAATATTGACGCTGAGGC  
ACGAAAGCGTGCGGATCAAACAGGATTAGATACCCCACTAGTCC  
>Otu4274  
CCAGCCTACGGGGGCGCAGCAGCCGAGAATATTCGACAATGGGCGAAAGCCTGATCGAGCG  
ACGCCGCGTGAGGATGAAGTCCTTAGGGACGTAACTCCTTTTATAGGTTAGAAAGTTA  
TTGATCAACCTAGGAATAAGAGGTTGCTAACTCGTGCCAGCAGCAGCGGTAATACGAGT  
GCCTCAAGCGTTATCCGGAATTACTGGGCGTAAAGGGTGTGTAGGCGGTTTGTAGTCT  
TGTGTAAAAACTTCTCGCTTAACGAGAAATCTGCATAGGAAACGGCAAACTAGAAGATG  
AGAGGGGAGCATAGAACTCATGGTGTAGGGGTGAAATCCGTTGATATCATGGGGAATACC  
AAAAGCGAAGGCAGTGCTCTGGCTCATCTTGTGACGCTGAAACACGAAAGCGTGGGTAGCG  
AACGGGATTAGAGACCCTTGTAGTCC  
>Otu4278  
CCAGCCTACGGGATGCTGCAGTCGAGAATTTTTTCACAATGGGGGAAACCCTGATGGAGCG  
ACGCCGCGTGCGGGATGAATGGCTTCGGCCCGTAAACCCCTGTCATTTGCGAACAAATTG  
TTTCATTTAACACCTGAAACATTGATAGTAGTGGAAGAGGAAGGGACGGCTAACTCTGTG  
CCAGCAGCCGCGGTAATACAGAGGTCCCAAGCGTTGTTTCGGATTCACTGGGCGTAAAGGG  
TGCGTAGGTGGCCAGGTAAGTCTGATGTGAAATCTCGAAGCTCAACTTCGAACTGCATT  
GGATACTATCTGGCTGGAGGATCGGAGGGGAACTGGAATCTTGGTGTAGCAGTGTAAT  
GCGTAGATATCAAGAGGAACACCAGTGGCGAAGGCGAGTCTCTGGACGATTCTTGACACT  
GGGGCACGAAAGCTAGGGGAGCAAACAGGATTAGAGACCCTAGTAGTCC  
>Otu4284  
CCAGCCTACGGGGGGCAGCAGTGGGGAATATTGGACAATGGGGGCAACCCTGATCCAGCA  
ATGCCGCGTGTGTGAAGAAGGCCTTCGGGTTGTAAAGCACTTTCAGTGGGGAGGAAGGGT  
TGTTAATTAATACTTAACAACATTGACGTTACCCACAGAAGAAGCACCGGCTAACTCTGT  
GCCAGCAGCCGCGGTAATACAGAGGGTGCAAGCGTTAATCGGAATGACTGGGCGTAAAGC  
GTGTGTAGGTGGTTGGATAAGTTAGATGTGAAATCCCTGGGCTTAACCTGGGAAGTGCCT  
TTAAGACTGTCCAACCTAGAGTACTGTAGAGGATAGTGGAATTTCCAGTGTAGCGGTGAAA  
TGCGTAGATATTGGAAGGAACACCAGTGGCGAAGGCGACTGTCTGGATAGATACTGACAC  
TGAGACACGAAAGCGTGGGGAGCAAACAGGATTAGATACCCGCGTAGTCC  
>Otu4285  
CCAGCCTATGGGGGGCTGCAGTCGAGGATCATTCGCAATGAGCGAAAGCTTGACGATGCG  
ACGCTGTGTGAACGATGAAGGCCTTCGGGTTGTAAAGTTCTTTTCGCTTGGGAACAAGAGA  
ATTTAGTGAATAACTGAGTAATTTGAGTGTACCAGGTAAAGAAGCACCGGCTAACTCCGT  
GCCAGCAGCTGCGGTAATACGGAGGGTGCAAGCATTAATCGGATTTATTGGGCGTAAAGG  
GCGCGTAGGCGGACTATCAAGTCAGATGTGAAATACCAAAGCTCAACTTTGGTGTGTCAT  
TTGAAACTGGTAGACTTGAGGGTTGACGGAGAAAATGGAATTCACGTGTAGCGGTGAAA  
TGCGTAGATATGTGGAAGAACACCTGTGGCGAAAGCGATTTTCTAGTTAATACCTGACGC  
TGAGGCGCGAGAGCAAGGGGAGCAAGCAGGATTAGAGACCCGTGTAGTCC  
>Otu4286  
CCAGCCTACGGGGTGCACCAGTAACGAATCTTCGCAATGTACGAAAGTATGACGGAGCG

ACGCCGCGTGTAGGACGAAGCCCTTCGGGGTGTAACTACTGTCAGGGGTTAGAAAAGCTC  
TGATCAACCCAGAGGAAGGCACGGCTAACTCTGTGCCAGCAGCCGCGGTAAAGATAGAGG  
TGCCAAGCGTTAGGCGGAATCACTGGGCTTAAAGCGTGTGTAGGCGGAATCGTAAGCACC  
TTGTGAGATCCCACGGCTCAACCGTGGAAGTGCCTGGTATACTGCGATTCTTGGGCCAAT  
TAGGGGCAGCCGGAACAAATGGTGGAGCGGTGAAATGCGTAGATATCATTTGGAACGCCA  
AGGGCGAAAGCAGGCTGCTGGGATTGTGCCGACGCTGAGACACGAAAGCCAGGGGAGCAA  
ACAGGATTAGAAACCCCGGTAGTCG

>Otu4287

CCAGCCTACGGGATGCTGCAGTCGAGAATTTTTCTCAATGGGCGAAAGCCTGAAGGAGCG  
ACGCCGCGTGGGGGATGAAGGGCTTCGGCCCGTAAACCCCTGTCATTTGCGAACAAACCC  
CGCGACCCAACACGTCGCGGGCTGATGTAGCGAAAGAGGAAGGGACGGCTAACTCTGTGC  
CAGCAGCCGCGGTAAATACAGAGGTCCCAAGCGTTGTTTCGGATTCACTGGGCGTAAAGGGT  
GCGTAGGTGGCGGGGTAAAGTTTGATGTGAAATCTCCGGGCTTAACCCGGAAGTGCATTG  
AATACTATCTTGCTCGAGGTTTGGAGGGGGGACTGGAATTCTCGGTGTAGCAGTGAAATG  
CGTAGATATCGAGAGGAACACCAAGTGGCGAAGGCGAGTCCCTGGACAACACCTGACACTG  
GGGCACGAAAGCTAGGGGAGCAAACAGGATTAGATACCCCGTAGTCC

>Otu4289

CCAGCCTACGGGAGGCTGCAGTGAGGAATATTGCGCAATGGAGGAAACTCTGACGCAGCG  
ACGCCGCGTGGGTGATGAAGGCTTTCGGGTCGTAAAGCCCTGTCGGAAGGGACGAAAAAC  
GTTGTGGCTAACATCCACGACGATTGACGGTACCTTTAAAGGAAGCACC GGCTAACTACG  
TGCCAGCAGCCGCGGTAAATACATAGGGTGCAAGCGTTGTTTCGGAATCATTTGGGCGTAAAG  
CGCGTGTAGGCGGTCAAATAAGTCGAGTGTGAAATCCCTGGGCTCAACCGAGGAAGTGCA  
TCCGAAACTATTTGGCTGGAAGGAGGTAGAGGAAGGTGGAATTCCTAGTGTAGAGGTGAA  
ATTCGTAGATATTAGGAGGAATACCGGCGGCGAAGGCGGCCTTCTGGACCTCTCTTGACG  
CTGAGACGCGAAAGCGTGGGTAGCAAACAGGATTAGAGACCCCGGTAGTCC

>Otu4290

CCAGCCTATGGGGTGCTCCAGTGGGGAATATTGGACAATGGGGGAAACCCCTGATCCAGCG  
ACGCCGCGTGTGTGAAGAAGGCCTGCGGGTTGTAAAGCACTTTTAGTGGGGACGAAAAAGC  
CTGGGGCTAATACCCTTTGGTCTTGACTTAACCCAAAGAAAAAGCACCGGCTAACTCTGT  
GCCAGCAGCCGCGGTAAATACAGAGGGTGCAAGCGTTAATCGGAATTACTGGGCGTAAAGG  
GTGCGTAGGTGTTGTTTAAAGTTTGCTGTGAAAGCCCCGGGCTCAACCTGGGAATGGCAG  
TGAATACTGGACAGCTAGAGTGCGGTAGAGGGTAGTGGAATTCCTGGTGTAGCAGTGAAA  
TGCGTAGAGATCGGGAGGAACACCAAGTGGCGAAGGCGGCTACCTGGACCAGCACTGACAC  
TGAAGCACGAAAGCGTGGGGAGCAAACAGGATTAGATACCCGTGTAGTCC

>Otu4294

CCAGCCTACGGGGGGTACCAGTGGGGAATATTGGACAATGGGCGAAAGCCTGATCCAGCA  
ATACCGCGTGAGTGATGAAGGCCTTAGGGTTGTAAAGCTCTTTTAATAGGGAAGATAATG  
ACGGTACCTATAGAAAAAGCCCCGGCTAACTCCGTGCCAGCAGCCGCGGTAAAGACGGAGG  
GGGCTAGCGTTGTTTCGGAATTACTGGGCGTAAAGAGCGCGTAGGCGGCTATGCAAGTTGG  
GAGTGAAATCCCTGGGCTTAACCCAGGAAGTGCCTTCCAAAAGTGCCTAGCTAGAGTATGG  
TAGGGGGTGATAGAATTCCTAGTGTAGAGGTGAAATTCCTAGATATTAGGAGGAATACCG  
GTGGCGAAGGCGATCACCTGGGCCATTACTGACGCTGAGGCGCGAAAGCGTGGGGAGCAA  
ACAGGATTAGAAACCCAGTAGTCC

>Otu4295

CCAGCCTATGGGGTGCTGCAGTGGGGAATTTTGGACAATGAGCGAAAGCTTGATCCAGCA  
ATACCGAATGGGTGATGAAGACTGATTTGGTTGTAAAAGCTCTTTTCGACAAAAAGGATAAT  
GACGTTGTTTGGGAGAAGAAGTCCTGGCCAATAGCCGTGCCAGCAGCCGCGGAAATACGG  
TAGGGGCAAGCGTTATTACATTTAATGGGCGTAAAGGGTGCCTAGGTGGTCTTTTTTTA  
ATTTTTTGTAAAAAACATAGCATAACTATGTAGAAGCAAAAAAATTTTAAGACTTTGA  
GTGGGAGAGAGGTTTAGGGAATTTTCAGTGAAAAAGTGGAATTTTACCATATTGAAAGGA  
ACGCTACAGCGAAGGCACTTTTCCAGATCTTAACTGACATTGAGGCACGAAGGCATAGG  
GATCAAACGGGATTAGATACCCCGTAGTCC

>Otu4300

CCAGCCTATGGGGTGCTCCAGTGGGGAATTTTGGACAATGGGGGCAACCCCTGATCCAGCA  
ATGCCGCGTGAGTGAAGAAGGCCTTCGGGTTGTAAAGCTCTTTTGTGAGGGAAGAAACGG  
TTCATCCTAATACGGTGGGCTAATGACGGTACCTGAAGAATAAGCACCGGCTAACTACGT  
GCCAGCAGCCGCGGTAAATACGTAGGGTGCAAGCGTTAATCGGAATTACTGGGCGTAAAGC  
GTGCGCAGGCGGTTTCGCAAGTCAGATGTGAAATCCCCGGGCTTAACCTGGGAAGTGCAT



TTGAAACTACGAGGCTAGAGTGTGTCAGAGGGGGGTAGAATTCCACGTGTAGCAGTGAAA  
TGCGTAGAGATGTGGAGGAATACCGATGGCGAAGGCAGCCCCCTGGGATAACACTGGCGC  
TCATGCACGAAAGCGTGGGGAGCAAACAGGATTAGATACCCCGGTAGTCC

>Otu4301

CCAGCCTACGGGAGGCAGCAGTCAGGAATCTTGGTCAATGGACGAACGTCTGAACCAGCG  
ATGCCACAGTGGGAGGAAGGTATACACTGTAAACCACAGACGATCGAACGAAGGATGATG  
GGTTCGATCTGACAAGCTCTATGTAATTTTCGGTGCCAGCACATGCGGTCAATCCGAAAGA  
GCGAGGCATGCTCTATGGAATTGGGTCTAAAACGTCTGTAGATGGTCGACGCGAGGCATC  
TTGTTGAAGTTCGACACACGGATGGATGCGAGGTGGACCCGTCGTCTTGAGTACGAGAGA  
GGAAGGTGGAATGTCGAGCGGACCGATGAAATGGGTTGATTCTCGATGGAATCCAGAGG  
CGAAGGCGACCTTCTGGCTCGTACTGACATTGAGAGACGAAAGCCTGGGGAGCAAATCCG  
ATTAGATACCCGCGTAGTCC

>Otu4302

CCAGCCTACGGGGGGGCAGCAGTGGGGAATCTTGCAACAATGGAGGAAACTCTGATGCAGCG  
ACGCCGCGTGAGCGATGAAGCCCTTTCGGGTGTAAAGCTCTTTCGGCAGGGAAGATGATGA  
CGGTACCTGCAGAAGCAGCTGCGGCTAACTACGTGCCAGCAGCCGCGGTAATACGTAGGC  
AGCAAGCGTTGTTTCGGAGTTACTGGGCGTAAAGGGTGCCTAGGCGGCCTTGTAAGTATGG  
TGTGAAATCTCCCGGCTTAACTGGGAGGGTGCCTATTAAGTGCAGGGCTAGAGTGCAGG  
AGAGGAAAGTGAATTCCTGGTGTAGCGGTGAAATGCGTAGATATCAGGAGGAACACCTG  
CGGTGTAGACGGCTTTCTGGACCATCACTGACGCTGAGACACGAAAGCGTGGGTAGCAAA  
CAGGATTAGATACCCTCGTAGTCC

>Otu4303

CCAGCCTATGGGGGGCACCAGTGGGGAATCTTGCGCAATGGGCGAAAGCCTGACGCAGCA  
ACGCCGCGTGAGAGGACGAAGGCTTTCTGAGTTGTAAACTCCTTTCAGCAGGGACGATTGT  
GACGGTATCTGAGGAATAAGCACCGGCTAACTCTGTGCCAGCAGCCGCGGTAATACAGAG  
GGTGCAGCGTTAATCGGAATTACTGGGCGTAAAGCGCGCTAGACGGTTTTGTAAAGTCA  
GATGTGAAATCCCTGGGCTCAACCTGGGAACTGCATTTGATACTGCATGGCTAGAGTATC  
GAAGAGGGAAGTGAATTTCCGGTGTAGCGGTGAAATGCGTAGATATCGGAAGGAACACC  
AGTGGCGAAAGCGACTTCCTGGTCAATACTGACGTTTATGTGCGAAAGCGTGGGGAGCA  
AACAGGATTAGAAACCCTAGTAGTCC

>Otu4305

CCAGCCTATGGGATGCACCAGTGGGGAATTTTGCGCAATGGGGGAAACCCTGACGCAGCA  
ACGCCGCGTGAGAGGATGAAGCCCTTGGGGCGTAAACTCCTTTCGACCAAGACGATAATG  
ACGGTACTGGTGGAAGAAGCACCGGCTAACTCTGTGCCAGCAGCCGCGGTAATACGTAGG  
GGGCGAGCGTTGTCCGGGGTACTGGGCGTAAAGGGCACGCAGGCGGTCTGCTACGTTTCG  
GAGTGACAGTTGTCAGCTTAACTGACAAAGGTCTTCGAAAACGGGTAGACTTGAGGCCTT  
GAGAGGGAGACGGAATTCGGGTGGAGCGGTGAAATGCGTAGAGATCCGGAGGAACACCG  
AAGGCGAAGGCAGTCTCCTGGCAAGGTACTGACGCTCAGGTGCGAAAGCTAGGGGAGCGA  
ACAGGATTAGATACCCTGTAGTCC

>Otu4307

CCAGCCTATGGGGTGCTGCAGCTAAGAATCTTCCGCAATGGGCGAAAGCCTGACGGAGCG  
ATGCCGCGTGATCGATGAAGGTCGAGAGATTGTAAAGATCTTTTCCAGTTGAGGAATAAG  
TCTAGGAGGGAATGCCTGGATGATGACGTTAAACTGGGAATAAGCCCCGGCTAATTACGT  
GCCAGCAGCCGCGGTAATACGTAAGGGGCGAGCGTTGTTTCGGAATTATTGGGCGTAAAGG  
GCACGCAGGCGGTTATGCAAGTCTGGTGTGAAAGACCTGGGCTTAACTCAGGGAACGCGC  
TGGAACCTGTATGACTAGAAATCTTGGAGGGGAGTTGGAATTCCTAGTGTAGGGGTGAAA  
TCTGTTGATATTAGGAAGAACACCGGTGGCGAAGGCGAACTCCTGGCTGTAGATTGACGC  
TGAGGTGCGAAAGCATAGGGAGCAAACAGGATTAGAAACCCTTGTAGTCC

>Otu4308

CCAGCCTATGGGGGGCAGCAGTCGAGAATCTTTCGCAATGGACGAAAGTCTGACGAAGCG  
ACGCCTCGTGAGTGATGAAGGCCTACGGGTGTAAAGCTCTTTTGTGAGGGAACAAGAAA  
AGAGGGTTAATAGCCTTCCATTTGAGTGTACCTGAAGAATAAGCACCGGCTAACTCCGTG  
CCAGCAGCCGCGGTAATACGGAGGGTGCAAGCATTACTCGGAATAACTGGGCGTAAAGGG  
CGCGTAGGCGGCCCTGTAAGTCGGGAGTAAATTCAGAACTTAATTCTGGAGCTGCTCT  
CGAAACTACATGGGCTTGAGGTTAGGATGTGAAAGTAGAATTCACGTGTAGCGGTGAAA  
TGCGTAGATATGTGGAAGAAGACCTGTAGCGAAAGCGACTTTCAGAACTACACCTGACGC  
TGAGGCGCGAAAGCGTGGGGAGCAAACAGGATTAGAAACCCTAGTAGTCC

>Otu4309

CCAGCCTATGGGTGGCTGCAGTAGGGAATCTTCCACAATGGGCGAAAGCCTGATGGAGCA  
ACGCCGCGTGAGGATGAAGGCCTTCGGGTGCTAAACTGCTTTTATCTGTGACGATTATG  
ACGGTAGCAGATGAATAAGGATCGGCTAACTCCGTGCCAGCCAGCCTATGGGACGCACCA  
GCGGTAATACGTAGACCTCAAGCGTTATCCGGATTTATTGGGCGTAAAGCGCGTGTAGGT  
GGCTTCGCGCGTCTTCTGTAAAGCCAGGGCCTAACCTGGAAGTGCAGGAGATACGGC  
GGAGCTCGAGGAGTTAGAGGTGCATGGAACGCACGGTGTAGGGGTGAAATCCGTTGATA  
TCGTGCGGAATACCAAAGGCGAAGGCATTGCACTGGGACCTTCCTGACACTGAGACGCGA  
AAGCGTGGGGAGCAAAAAGGATTAGATACCCTAGTAGTCC

>Otu4311

CCAGCCTATGGGAGGCACCAGTGGGGAATCTTGCGCAATGGACGAAAGTCTGACGCAGCG  
ACGCCGCGTGGGTGAAGAAGGCCTTCGGGTGTAAAGCCCTGTCGAGTGAGACAAATGGT  
ACGTGGAGTAACTGCCACGTATTTGATGGTATCACTAAAGGAAGCACCGGCTAACTCTGT  
GCCAGCAGCCGCGTAATACAGAGGGTGCAAGCGTTGTTTCGGAATTATTGGGCGTAAAGG  
GCAAGTAGGTGGTCTCAAAAGTTTACTGTGAAATCCCTGGGCTTAACCCAGGAACTGCGG  
TGGATACTCTGAGACTTGAGTGCTGGAGGGGTGCGTGGAATTCCTGGTGTAGCGGTGAAA  
TGCGTAGATATCGGGAGGAACACCAGAGGCGAAAGCGGCGCACTGGACAGCAACTGACAC  
TCAATTGCGAAAGCGTGGGGAGCAAACAGGATTAGAGACCCTCGTAGTCC

>Otu4315

CCAGCCTACGGGATGCACCAGTTGGGAATCTTGCGCAATGGGGGAAACCCTGATGCAGCG  
ACGCCGCGTGGAGGATGACGGATCTAGGTCTGTAAACTCCTTTTGCACGGAAAGACTTAG  
GACGGTACCGTGCGAATAAGCACCGGCTAACTACGTGCCAGCAGCCGCGGTAAGACGTAG  
GGTGCAAGCGTTGTCCGGATTTACTGGGCGTAAAGAGCGCGTAGGCGGTCTGTTAAGTGA  
GAAGTGAATCTCCAGGGCTCAACCCGGAACCTGCTTTTCATACTGGCAGACTAGAGGGA  
TGCAGAGGTTTGTGGAATTCCTGGTGTAGCGGTGAAATGCGTTGATATCAGGAGGAACAC  
CCATGGCGAAGGCAGCAAACCTGGGCATCATCTGACGCTGAGGCGCGAAAGCGTGGGTAGC  
AAACAGGATTAGATACCCTAGTAGTCC

>Otu4317

CCAGCCTATGGGTGCGCAGCAGTAGGGAATATTGCGCAATGGCCGAAAGGCTGACGCAGCG  
ACGCCGCGTGGAGGATGAAGTCCGTTAGGATGTAAACTCCTTTTGCAGGGGATGAATGTT  
CCGGTTCATTTCGGAATTGACCGTACCTTGCGAATAAGGATCGGCTAACTACGTGCCAGCA  
GCCGCGGTAATACGTAGGATCCGAGCGTTGTCCGGATTTACTGGGTGTAAAGGGTGTGTA  
GGTGGATTTCTAAGTCGGTGGTGAATCCCGCGGCTTAACCGCGGAATTGCTTCCGATAC  
TGGAGATCTTGAGTTCGGCAGAGGGAGATGGAATTCATGGTGTAGCGGTGAAATGTGTAG  
ATATCATGAAGAACACCGGTAGCGAAGGCGGTCTCCTGGTCCGATACTGACACTGAGGCG  
CGAAAGCGTGGGGAGCAAACAGGATTAGAGACCCCGGTAGTCC

>Otu4318

CCAGCCTACGGGGGGCTCCAGTGGGGAATTTTGTGCAATGGGCGAAAGCCTGACACAGCG  
ACACCGCGTGAGCGAGGAAGCCCTTTGGGGTGTAAAGCTCTGTCAGCAGGAACGAATAAA  
TGACGGTACCTGCAGAGGAAGCATCGGCTAACTACGTGCCAGCAGCCGCGGTAAGACGTA  
GGATGCGAGCGTTGTCCGGATTTATTGGGCGTAAAGAGTTCGTAGGCGGTTTGTAAAGTC  
TGATGTTAAAGATCAGGGCTCAACCCTGGGAGTGCATTGGATACTGGCAGACTTGAGTAT  
GGTAGAGGCGAGTGAATTCCTAGTGTAGCGGTGAAATGCGTAGATATTGGGAAGAACAC  
CGGTGGCGCAAGCGACTCGCTGGGCCATTACTGACGCTGAGGAACGAAAGCTAGGGGAGC  
GAATGGGATTAGAAACCCGGGTAGTCC

>Otu4319

CCAGCCTACGGGTTGCACCAGTGAGGAATTTTGTCTCAATGGGCGAAAGCCTGAAGCAGCG  
ACGCCGCGTGAATGATGAAGTCCTTCGGGATGTAAAGTTCTGTCAGCAGGGACAATTATG  
ATGGTACCTGCAGAGGAAGCACCGGCAAACCTATGTGCCAGCAGCCGCGGTAATACATAGG  
GTGCAAGCGTTGTCCGGATTTACTGGGCGTAAAGAGCGTGTAGGCGGTATGATAAGTCAA  
ACTTTAAATCTCTTGGCTCAACCAGAGATCGGGTTTGATACTGTCGTGCTAGAGAATGG  
GAGAGGAAAGTAGAACTAACAGTGTAGCGGTGAAATGCGTAGATATTGTTAGGAATACCC  
GTGGCGAAGGCGGCTTTCTGGACCATTCTGACGCTGAGACGCGAAAGCGTGGGGATCAA  
ACAGGATTAGAAACCCGCGTAGTCC

>Otu4320

CCAGCCTACGGGTGGCTCCAGCGACGAATCTTCTGCAATGGGCGAAAGCCTGACAGAGCA  
ATGCCGCGTGTGGGATGAAGCGTCTATGACGTGTAAACCACTGTCAGGGGGCGGAACCAA  
TGATTGCCCCAGAGGAAGAGCCGGCTAACCTGTGCCAGCAGCCGCGGTAATACAGGGG  
GCTCGGGCGTTACGCGGAATCACTGGGCTTAAAGGGTGGTGTAGGTGGTTTCGCAAGCATT

ACGTGAAAGCCCCGGGCTCAACCCGGGAACAGCGCGATGAACTGGCGAACTTGAGGCAAG  
TAGGGGCCGACGGAACAGTGGGTGGAGCGGTGAAATGCTTAGAGATCCACTGGAACGCCG  
ATGGTGAAGACGGTTCGGCTGGGCTTGTCTTGACACTGAGGCACGAAAGCGTGGGGAGCAA  
ACAGGATTAGAAACCCCGGTAGTCC

>Otu4322

CCAGCCTACGGGGTGCTGCAGTAACGAATCTTCCGCAATGCAGGAACTGTGACGGAGCG  
ACGCCGCGTGTGGGACGAAGTTCTTCGGAATGTAAACCACTGTCAGGGGAAAGAAAGTTC  
TGATCTACCCAGAGGAAGGCACGGCTAACTCTGTGCCAGCAGCCGCGGTAAGACAGAGG  
TGCCGAGCGTTAGGCGGAATCACTGGGCTTAAAGCGTGTGTAGGCGGGTTCGTAAGTACC  
TTGTGAAATCCCACGGCTTAACCGTGGAACGCTTGGTATACTGCGAGTCTTGAGTCATT  
CAGGGGCAACCGGAACAAATGGTGGAGCGGTGAAATGCGTAGATATCATTTGGAACGCCA  
ATGGTGAACACAGTTGCTGGGGATGTACTGACGCTGAGACACGAAAGCCAGGGGAGCAA  
ACGGGATTAGATACCCGAGTAGTCC

>Otu4326

CCAGCCTATGGGAGGCACCAAGTGGGGAATATTGGACAATGGGGGCAACCCTGATCCAGCA  
ATGCCGCGTGTGTGAAGAAGGCCTTCGGGTTGTAAAGCACTTTAGGCGGGGAAGAAGGTA  
TGTATTTTAAGAGATAACATATTTGACGGTACCCGCAGAATAAGCACCGGCTAACTCTGT  
GCCAGCAGCCGCGTAATACAGAGGGTGCAAGCGTTAATCGGATTTACTGGGCGTAAAGG  
GTGCGTAGGTGTTGTGTAAAGTGAGATGTGAAATCCCCGGGCTTAACCTGGGAACGTCAT  
CTTATACTGCGCAGCTGGAGTACATGAGAGGGTAGTGGAATTTCCGGTGTAGCGGTGAAA  
TGCGTAGATATCGGAAGGAACACCAAGTGGCGAAGGCGGCTACCTGGCATGATACTGACAC  
TGAGGCACGAGAGCGTGGGGATCAAACAGGATTAGAAACCCAGTAGTCC

>Otu4336

CCAGCCTACGGGGTGCGAGCAGTAGGGAATATTGCGCAATGGAGGAACTCTGACGCAGCG  
ACGCCGCGTGGGTGACGAAGGCCTTCGGGTCGTAAAGCCCTGTGCGAAGGGACGAAAAAC  
GTAATGGCTAACATCCATGACGATTGACGGTACCTTCAAAGGAAGCACCGGCTAACTACG  
TGCCAGCAGCCGCGTAATACGTAGGGTGCTAGCGTTGTTTCGGAATCATTTGGGCGTAAAG  
CGCGTGTAGGCGGTTAGGTAAGTCAATGTGAAATCCCTGGGCTCAACCGAGGAAGTGCA  
TACGAAACTGCCTGGCTAGAGGACGGTAGAGGAAGGTGGAATTCCTAGTGTAGAGGTGAA  
ATTCGTAGATATTAGGAGGAATACCGGTGGCGAAGGCGGCCTTCTGGGCCGATCCTAACG  
CTGAGACGCGAAAGCGTGGGGAGCAAACAGGATTAGATACCCTGGTAGTCC

>Otu4338

CCAGCCTACGGGGCGCTGCAGTGGGGAATATTGGACAATGGGGGCAACCCTGATCCAGCA  
ATGCCGCGTGAGTGATGAAGGCCTTAGGGTTGTAAAGCTCTTTTGTCTGTGATGATAATG  
ACAGTAGCAGACGAATAAGCCCCGGCTAACTTCGTGCCAGCAGCCGCGGTAATACGAAGG  
GGGCTAGCGTTGTTTCGGAATAACTGGGCGTAAAGGGCGCGTAGGCGGTTAGATACGTCTG  
ATGTGAAAGTCTGGGCTTAACCTAGGGACTGCATTGGATACGGTTTAGCTTGAGTGCGA  
GAGGGGAAAATGGAATTGCGCGTGTAGAGGTGAAATTCGTAGAGATGCGCAAGAACACCG  
GTGGCGAAGGCGATTTTCTGGCTCGCAACTGACGCCGAGGCGCGAAAGCGTGGGGAGCAA  
ACAGGATTAGAAACCCGGGTAGTCC

>Otu4339

CCAGCCTATGGGGGGCTGCAGTGGGGAATATTGGACAATGGGGGGAACCCTGATCCAGCA  
ATGCCGCGTGTGTGAAGAAGGCCTTAGGGTTGTAAAGCACTTTCAGTGGGGAGGAAGGAG  
TGTGCGCTAATACCGTACATTATTGACGTTACCCACAGAAGAAGCACCGGCTAACTCTGT  
GCCAGCAGCCGCGTAATACAGAGGGTGCAAGCGTTAATCGGAATGACTGGGCGTAAAGC  
GTGTGTAGGTGTTAGATAAGTTAGATGTGAAATCCCCGGGCTTAACCTGGGAACGTCGT  
TTAAGACTGGTTAGCTAGAGTACTGTAGTGGATAGTGGAATTTCCAGTGTAGCGGTTAAA  
TGCGTAGATATTGGAAGGAACACCAAGTGGCGAAGGCGACTATCTGGACAGATACTGACAC  
TGAGACACGAAAGCGTGGGGAGCAAACAGGATTAGAGACCCCCGTAGTCC

>Otu4342

CCAGCCTATGGGGCGCTGCAGTCGAGAATCTTCCGCAATGGACGAAAGTCTGACGGAGCG  
ACGCCGCGTGATGATGAAGCTTTTCGGAGTGTAAGATCTTTTATGAGGGAAGAAGTTT  
ATTGACGGTACCTCATGAATAAGGGGCTCCTAATCTCGTGCCAGCAGGAGCGGTAATACG  
AGAGCCCCGAGCGTTATCCGGAATTATTGGGCGTAAAGGGTGCGTAGGTGGTTCTGTTAG  
TCGTTTGTCAAACTCTCTGGGCTTAACCCAGAAACCGCGAACGAAACGGCAGAACTTGAGA  
GTGTGAGGGGTGAATGGAACCTCATGGTGTAGGGGTGAAATCCGTTGATATCATGGGGAAC  
ACCAAAGCGAAGGCAATTCCTGACCATATCTGACACTCAAGCACGAAAGCGTGGGTA  
CGAATGGGATTAGAAACCCGCGTAGTCC

>Otu4344

CCAGCCTACGGGTCGCTGCAGTCGAGAATCTTCCACAATGGACGAAAGTCTGATGGAGCG  
ACGCCGCGTGATTGATGAAGTCCTTCGGGACGTAAAGATCTTTTATGGGGGAGGAAGTAA  
TTGACGTTACCCCATGAATAAGAGGCTCCTAACTCTGTGCCAGCAGGAGCGGTAATACTG  
AGGCCTCAAGCATTATCCGGAATCACTGGGCGTAAAGGGTGTGTAGGCGGCGTTGTTAGT  
CTTTCGTAAAAGCTCTGGGGCTTAACCTCGGAAATGCGGGAGAAACGGCAATGCTCGAGG  
ACGCGAGAGGTATATGGAACCTCATGGTGTAGGGGTGAAATCCGTTGATATCATGGGGAAC  
ACCAAATGCGAAGGCAATATACTGGCGCGCTCCTGACGCTGAAACACGAAAGCGTGGGAA  
TCGAACGGGATTAGATACCCCCGTAGTCC

>Otu4350

CCAGCCTATGGGAGGCTGCAGTCGAGAATATTCCCCAATGGACGAAAGTCTGAGGGAGCG  
ACGCCGCGTGCAAGGATGAAGGCCTTTGGGTCGTAAACTGCTTTTTTCAGGGAAGAATCAT  
GACGGTACCTGAAGAATAAGAGGTTGCTAACTCTGTGCCAGCAGCAGCGGTAATACAGAG  
ACCTCAAGCGTTATCCGGATTTATTGGGCGTAAAGGGTCCGCAGGTGGTCGTGCGCGTCG  
ATTGTTAAATCCCCGAGCTCAACTCGGAAATCGCAGTCGATACGGCAAGACTAGAGGCCG  
GAAGAGGTAAGCGGAATTGCCGGTGTAGTAGTAATATGCGTTTCATATCGGCAAGAACACC  
AAATGCGAAGGCAGCTTACTGGGACGCGCCTGACACTCAGGGACGAAAGCGTGGGGAGCG  
AAAGGGATTAGAAACCCCTAGTAGTCC

>Otu4355

CCAGCCTACGGGGGGCAGCAGTGGGGAATATTGCGCAATGGGCGAAAGCCTGACGCAGCG  
ACGCCGCGTGTGCGATGAAGGTCTTCGGATCGTAAAGCACTGTCGCGGGGGAAAAAAGAA  
ATGATGGTACCCCGAGAGGAAGCACCGGCTAACTCTGTGCCAGCAGCCGCGGTAATACAG  
AGGGTGCAGAGCGTTGTTTCGGAATTATTGGGCGTAAAGCGCTGGTAGGTGGCCTGACAAGT  
CGCGTGTGAAAGCTCCCGGCTCAACCGGGAAAGTGC GCGCGAAACTGGCGGGCTTGAGTG  
CCGGAGAGGACCGCGGAATTCCCGGTGTAGAGGTGAAATTCGTAGATATCGGGAGGAACA  
CCAGAGGCGAAGGCGGCGGTCTGGAAGGCGACTGACACTGAGCAGCGAAAGCGTGGGGAG  
CAAACAGGATTAGAAACCCCTGTAGTCC

>Otu4358

CCAGCCTATGGGAGGCAGCAGTGGGGAATCTTGCGCAATGGGCGAAAGCCTGACGCAGCG  
ACGCCGCGTGGGTGATGAAGGCCTTCGGGTGTAAAGCCCTGTGGGGAGGGACGAATAAG  
TCAGGGTGAACAATCCTGATGATGACGGTACCTTCTTAGCAAGCACCGGCTAACTCTGTG  
CCAGCAGCCGCGGTAAGACAGAGGGTGCGAACGTTGTTTCGGAATTACTGGGCGTAAAGCG  
CGTGTAGGCGGCACGGTAAGTCGGGTGTGAAAGCCCGGGGCTCAACCCCGGAAGTGCATT  
CGATACTACCAAGCTGGAGTCTCGGAGAGGCGGGTGGAACCTCTCGGTGTAGAGGTGAAAT  
TCGTAGATATCGAGAAGAACACCGGTGGCGAAGGCGGCCCGCTGGACGAAGACTGACGCT  
GAGACGCGAAAGCGTGGGGAGCAAACAGGATTAGAGACCCCCGTAGTCC

>Otu4364

CCAGCCTACGGGTGGCTGCAGTGGGGAATATTGCGCAATGGGGGAAACCCTGACGCAGCA  
ACGCCGCGTGAAGGATGAAGGTCTTCGGATTGTAAACTTCTTTGATTGGGGAAGAATAAT  
GACGGTACCCAAAAAACAAGCCACGGCTAACTACGTGCCAGCAGCCGCGGTAATACGTAG  
GTGGCGAGCGTTGTCCGGAATTACTGGGTGTAAAGGGCGTGTAGGCGGGGAGACAAGTCA  
GATGTGAAATTCCAGAGCTCAACTCTGGCGCTGCATCTGAAACTGTATCTCTTGAGTGCT  
GGAGAGGAAAGCGGAATTCCCTAGTGTAGCGGTGAAATGCGTAGATATTAGGAGGAACACC  
AGTGGCGAAGGCGGCTTTCTGGACAGTAACTGACGCTGAGGCGCGAAAGCGTGGGGAGCA  
AACAGGATTAGATACCCGCGTAGTCC

>Otu4366

CAAGCCTATGGGGGGCTGCAGTGAGGAATCTTGGGCAATGAGGTAAACCTTGACCCAGCG  
AGAATTTCATGCACGATGAATGCGGTTAGTTTACTGTAAAGTGCTTTTGACGACGAAGATA  
ATGACTGTAGTTGAGACGTAAGAAGCATCGGCTAACTCCGTGCCAGCAGCTGCGGTAAGA  
CGGAGGATGCGGGCCTTATTCAATTATGATTGGGTGTAAAGGGTGC GTAGATGGCTGTTGA  
AATTTAAACAAAAAGCGTGGAGTATTCCTATGCGTGTGTTTTCTTATAGATTACAGCTAGT  
GTTGAGGAAAGGTAGCGATAATTCCTTGTGTAAAGGGTAAATCTTAAGAGTCAAGGAAGA  
ATACCAGCCGCGGAGGCGCGTTTCCCGCTCAACAGACGTTAAGGTACGGAAGCTATGG  
AAGCAAACAGGATTAGATACCCCAGTAGTCC

>Otu4372

CCAGCCTACGGGGCGCTGCAGTCGAGGATCTTTCGCAATGGGCGCAAGCCTGACGAAGCG  
ACGCTGCGTGAGCGATGAAGGCCTTCGGGTCGTAAAGCTCTTTCGCGCAAGATCAAGGGA  
GATGTGTGAATAACACATTGCCTTGAGGGTACTGCGTAAAGAAGCACCGGCTAACTCCGT

GCCAGCAGCTGCGGTAATACGGAGAGTGCAAGCATTAATCGGAATTATTGGGCGTAAAGG  
GCGCGTAGGCGGGAATGAAAGTCAGATGTGAAATTCGGAAGCTCAACTTCGGAGCTGCAT  
TTGAAACTACAATTCTAGAGGATTGACGGAGAAAACGGAATTCACGTGTAGCGGTGAAA  
TGCGTAGATATGTGGAGGAACACCTGTGGCGAAAGCGGTTTTCTAGCTTATACCTGACGC  
TGAGGCGCGAGAGCAAGGGGAGCAAACAGGATTAGAAACCCTAGTAGTCC

>Otu4373

CCAGCCTATGGGTCGCACCAGTAGGGAATATTGCGCAATGGAGGAACTCTGACGCAGCG  
ACGCCGCGTGGGTGATGAAGGTCTTCGGATCGTAAAGTCCTGTCGGATGGGAAGAAACAC  
GGTATGGCTAATATCCATACCGCTTGACGGTACCATTAAAGGAAGCACCGGCTAACTACG  
TGCCAGCAGCCGCGGTAATACGTAGGGTGCAAGCGTTGTTTCGGAATCATTTGGGCGTAAAG  
CGCGTGTAGGTGGTTTTGTAAAGTCGATTGTGAAATCCCTGGGCTCAACCGAGGAAGTGCA  
GTCGAACTAACTGACTAGAAGATGGTAGAGGAAGGTGGATTTCCAAGTGTAGAGGTGAA  
ATTCGTAGATATTTGGAGGAATACCGGCGGCGAAGGCGGCCTTCTGGGCCATTCTTGACA  
CTGAGACGCGAAAGCGTGGGTAGCAAACAGGATTAGAAACCCCGTAGTCC

>Otu4375

CCAGCCTATGGGAGGCTGCAGTCGAGGATCTTCGGCAATGGGCGCAAGCCTGACCGAGCG  
ACGCCGCGTGTGCGATGAAGGCCTTCGGGTGTAAAGCACTGTGAGGGGGAGAAAGTCC  
GCAAGGATTGATCTATCCCTGGAGGAAGCACGGGCTAAGTTCGTGTCAGCAGCCGCGGTA  
AGACGAACCGTGCGAACGTTGTTTCGGATTCCTGGGCTTAAAGGGCGCGTAGGCGGGTGG  
TCAAGTCAGGGGTGAAATCTTGCGGCTCAACCGCAAAAGTGCCTCTGATACTGGCCATCT  
CGAGGGAGGTAGGGGCATGTGGAACCTCCGGTGGAGCGGTGAAATGCGTAGATATCAGAA  
GGAACGCCGGTGGCGAAAGCGACGTGCTGGACCTCTTCTGACGCTGAGGCGCGAAAGCTA  
GGGGAGCAAACGGGATTAGAGACCCAGTAGTCC

>Otu4376

CCAGCCTATGGGGTGCTCCAGTGGGGAATATTGGACAATGGGCGAAAGCCTGATCCAGCC  
ATGCCGCGTGAGTGATGAAGGCCTTAGGGTTGTAAAGCTCTTTTACCAGGGAAGATGATG  
ACGGTACCTGGAGAATAAGCACCGGCTAACTTCGTGCCAGCAGCCGCGGTAATACGAAGG  
GTGCTAGCGTTGTTTCGGAATTACTGGGCGTAAAGCGCGTGTAGGCGGCTTACCAAGTCAG  
AGGTGAAATGCCGGGGCTCAACCCCGGAACTGCCTTTTGGAACTAGTAAGCTTCGAGTATT  
GGAGGGGAGTGCGGAATTGCTAATGTAGAGGTGAAATTCGTAGATATTAGCAGGAACGCC  
GGTGGCGAAGGCGGCACTCTGGACAATAACTGACGCTTAGGCGCGAAAGCGTGGGGATCA  
AACAGGATTAGATACCCGAGTAGTCC

>Otu4377

CCAGCCTATGGGAGGCAGCAGTAGGGAATTTTTCGCAATGGACGAAAGTCTGACGCAGCG  
ACGCCGCGTGAGGGATGAAGGTCTTCGGATTGTAAACCTCTGTTGGGTGGGAAGAACTT  
TTCCGGAATAATACGCCGGAATAATTGACGGTACCGCTTGAGGAAGCCCCGGCTAACTACG  
TGCCAGCAGCCGCGGTAATACGTAGGGGGCAAGCGTTGTTTCGGAATCACTGGGCGTAAAG  
GGAGCGTAGGCGGAGAGGTAAGTTGGAAGTTTAATTCCCGGGCTCAACCCGGGACCAGCT  
TTCAATACTGCCATTCTTGAGTATGGGAGAGGATGATGGAATTCCAGGTGTAGCGGTGGA  
ATGCGTAGATATCTGGAAGAACACCAGTTGCGAAGGCGGTCATCTGGCCCAATACTGACG  
CTGAGGCTCGAAAGCTAGGGGAGCAAACAGGATTAGAAACCCTAGTAGTCC

>Otu4386

CCAGCCTATGGGAGGCTCCAGTGGGGAATATTGGACAATGGGCGAAAGCCTGATCCAGCA  
ATGCCGCGTGTGTGAAGAAGGTCTTCGGATTGTAAAGCACTTTCGACGGGGACGATGATG  
ACGGTACCCGTAGAAGAAGCCCCGGCTAACTTCGTGCCAGCAGCCGCGGTAATACGAAGG  
GGGCTAGCGTTGCTCGGAATCACTGGGCGTAAAGCGCACGTAGGCGGCTTTTTAAGTCAG  
AGGTGAAATCCTGGAGCTCAACTCCAGAACTGCCTTTGATACTGAGGAGCTCGAGTCCGG  
GAGAGGTGAGTGGAACCTGCGAGTGTAGAGGTGAAATTCGTAGATATTGGGAAGAACACCG  
GTGGCGAAGGCGGCTCACTGGCCCGTTACTGACGCTCAGGCGCGACAGCGTGGGGATCAA  
ACAGGATTAGAAACCCCGTAGTCC

>Otu4389

CCAGCCTATGGGTGGCTCCAGTGGGGAATCTTGCACAATGGGGGCAACCCTGATGCAGCG  
ACGCCGCGTGAGCGATGAAGCCCTTCGGGGTGTAAGCTCTTTCGGCAGGGAAGATAATG  
ACGGTACCTGCAGAAGCAGCTGCGGCTAACTACGTGCCAGCAGCCGCGGTAATACGTAGG  
CAGCAAGCGTTGTTTCGGAGTTACTGGGCGTAAAGGGTGCGCAGGCGGCTATATAAGTCAG  
ATGTGAAATACCTAAGCTTAACTTGGGGGGTGCAATTTGATACTGTATGGCTAGAGTTAGT  
CAGAGGGGGGTAGAATTCCTGGTGTAGCAGTGAAATGCGTAGAGATCAGGAGGAATACCA  
ATGGCGTAGGCAGCCCCCTGGGACAAAACCTGACGCTCATGTACGAAAGCGTGGGAAGCAA

ACAGGATTAGATACCCCCGTAGTCC

>Otu4391

CCAGCCTATGGGAGGCTCCAGTCGAGAATTTTTCTCAATGGGCGAAAGCCTGAAGGAGCG  
ACGCCGCGTGAGGATGAATGGCTTCGGCCCGTAAACTCCTGTCATTTGCGAACAAATTA  
ATTCACCCAACACGTGGATTATTGATTGTAGCGGAAGAGGAAGGGACGGCTAACTCTGTG  
CCAGCAGCCGCGGTAATACAGAGGTCCCAAGCGTTGTTTCGGATTTACTGGGCGTAAAGGG  
TGCGTAGGCGGTGAGGTAAGTCTGACGTGAAATCTCCGGGCCTAACCCGGAAGTGCCTT  
GGATACTATCTCGCTAGAGGATTGGAAGGGAGACTGGAATACTTGGTGTAGCAGTGAAAT  
GCGTAGATATCAAGCGGAACACCAGTGGCGAAGGCGAGTCTCTGGACAATTCCTGACGCT  
GAGACACGAAAGCGTGGGTAGCAAACAGGATTAGAAACCCGGGTAGTCC

>Otu4393

CCAGCCTACGGGGTGCGAGCAGCGGGGAATATTGGACAATGGGGGCAACCCTGATCCAGCG  
ATGCCGCGTGGGTGAAGAAGGCCTTCGGGTGTAAAGCCCTTTAGGTTGGGAAGAAGAGT  
GTGTACTGAATAAGTGCATGCTTTGACGGTACCAACAGAATAAGCACCCGGCAAACCTCTGT  
GCCAGCAGCCGCGGTAATACAGAGGGTGCAGCGTTAATCGGATTTACTGGGCGTAAAGG  
GCGCGTAGGCGGTTGTGTGAGTGTGATGTGAAAGCCCCGGGCTTAACCTGGGAAGTGCAT  
CGCAAACGACACGACTGGAGTATAAGAGAGGGTGGCGGAATTTCCGGTGTAGCGGTGAAA  
TGCGTAGAGATCGGAAGGAACGTCAATGGCGAAGGCAGCCACCTGGCTTAATACTGACGC  
TGAGGCGCGAAAGCGTGGGGATCAAACAGGATTAGATACCCTAGTAGTCC

>Otu4394

CCAGCCTACGGGACGCTGCAGTCGAGAATTTTTCAATGGGCGCAAGCCTGATGGAGCG  
ACGCCGCGTGAGGATGAAGGTTCTTGAGTTGTAAACTCCTGTCACTGCAGAACAAGGAT  
ACACATGTGAATAGCGCGTGTATTTGATGGTATGCGGAGAGGAAGGGACGGCTAACTCTG  
TGCCAGCAGCCGCGGTAAGACAGAGGTCCCAAGCGTTGTTTCGGATTCATTGGGCGTAAAG  
GGTGTGTAGGAGGTCGGGTTAGTCAGGTGTGAAATCTCCAGCTTAACCTGGGAACTGCG  
CTTGATACTGCCCCGGCTAGAGGATCGGAGGGGGTAACGGAATTCATGGTGTAGCAGTGAA  
ATGCGTAGATATCATGAGGAACACCGGTGGCGAAGGCGGTTACCTGGAAGATTCCTGACT  
CTGAAACACGAAAGCCAGGGGAGCAAACAGGATTAGATACCCTAGTAGTCC

>Otu4395

CCAGCCTACGGGAGGCTCCAGTGAGGAATCTTGGGCAATGAGCGAAAGCTTGACCCAGCG  
AGAATTTGTGTGTGAGGAAGGCGTTGAGTTGTAAAGCACTTTCAGGTAGGAAGATAATGA  
CTGTACTACAGCAGAAGAAGTACTGGCTAAGTCTGTGCCAGCAGCCGCGGTAATACAGAC  
AGTGCAAGCGTTATTCAGATTTAATGGGCGTAAAGGGTATGTAGACGGTCTAAAAACTA  
GATAAAAAATGCTAGATTTATACTTTAGCTAAATATCTAAAGATTAAAGAACTTTGAGT  
TAATTAGAGGTTAGACGAATTTGTTGTGTAAACAGTAAAATGTTATTATATAATAAGGAC  
GACCAAAGGTGAAGACATCTTCTGCAATTAACGTTGAGGTACGAAGGCATGGGGA  
GCAAACAGGATTAGAAACCCGCGTAGTCC

>Otu4396

CCAGCCTACGGGTCGCTCCAGTGGGGAATATTGGACAATGGGGGAAACCCTGATCCAGCC  
ATGCCGCGTGAATGATGAAGGCCTTCGGGTGTAAAGTTCTTTTGCAGGGGACGATGATG  
ACGGTACCCTGAGAATAAGCTCCGGCTAACTTCGTGCCAGCAGCCGCGGTAATACGAAGG  
GAGCTAGCGTTGTTTCGGATTTACTGGGCGTAAAGGGCGCGTAGGCGGTTAGACAAGTTGGA  
AGTGAAAGCCCTGGGCTCAACCCGGGAATTGCTTTCAAACTGTCTTACTTGAATTCGGT  
AGAGGTTGGTAGAATTTCCAGTGTAGAGGTGAAATTCGTAGAGATTGGGAAGAATACCCG  
TGCGCAAGGCGGCCAACTGGACCGACATTGACGCTGAGGCGCGAAAGCGTGGGGAGCAAA  
CAGGATTAGAAACCCGCGTAGTCC

>Otu4400

CCAGCCTACGGGTGCAGCAGTAAGGAATATTGGTCAATGGGCGAAAGCCTGAACCAGCCA  
TGCCGCGTGCAGGAAGACGGCCCTACGGGTGTAAACTGCTTTTGCAGGGGAATAAACCC  
CCGGTTCGTGACCGGGGTTGAATGTACTCTGAGAATAAGGATCGGCTAACTCCGTGCCAGC  
AGCCGCGGTAATACGGAGGATCCGAGCGTTATCCGATTTATTGGGTTTAAAGGGTGCCT  
AGGCGGCTTTTAAAGTCAGGGGTGAAAGACGGTAGCTTAACTATCGCAGTGCCTTTGATA  
CTGAAGAGCTCGAATACACTAGAGGTAGGCGGAATGTGACAAGTAGCGGTGAAATGCATA  
GATATGTACAGAACACCAATTGCGAAGGCAGCTTACTATGGTGCAATTGACGCTGAGGC  
ACGAAAGCGTGGGGATCAAACAGGATTAGAGACCCTCGTAGTCC

>Otu4402

CAGCCTACGGGTGGCTGCAGTCGAGGATCTTCGGCAATGGGCGCAAGCCTGACCGAGCGA  
CGCCGCGTGTGCGATGAAGGCCTTCGGGTGTAAAGCACTGTCGAGGGGAAGAAAGCTCC

GCAAGGGGTTGATCGACCTCTGGAGGAAGCACGGGCTAAGTTCGTGCCAGCAGCCGCGGT  
AAGACGAACCGTGCGAACGTTGTTTCGGATTCACTGGGCTTAAAGGGCGCGTAAGCGGGCC  
ATCAAGTCAGGGGTGAAATCTTTTCGGCTCAACCGGAAAAGTGCCTTTGATACTGGTGGTC  
TCGAGGGAGGTAGGGGCATGCGGAACCTCCGGTGGAGCGGTGAAATGCATAAATATCGGA  
AGGAACGCCGGTGGCGAAAGCGGCGTGCTGGACCTCTTCTGACGCTGAGGCGCGAAAGCT  
AGGGGAGCAAACGGGATTAGAAACCCGAGTAGTCC

>Otu4404

CCAGCCTACGGGACGCTGCAGTGGGGAATATTGGGCAATGGGCGCAAGCCTGATCCAGCA  
ATGCCGCGTGAGTGAGGAAGGCCTTAGGGTTGTAAAGCTCTTTCGCACGTGACGATGATG  
ACGGTAGCGTGAGAAGAAGCCCCGGCTAACTTCGTGCCAGCAGCCGCGGTAATACGAAGG  
GGGCGAGCGTTGTTTCGGATTTACTGGGCGTAAAGGGCGCGCAGGCGGCTATCTTTGTGAG  
GCGTGAAAGCCCCGGGCTTAACCTGGGAACGCGTTTGGGACGGGATGGCTAGAGATCGG  
GAGAGGAGAGTGGAATTCACAGTGTAGAGGTGAAATTCGTAGATATTGGGAAGAACACCG  
GTGGCGAAGGCGGCTCTCTGGACCGATACTGACGCTGAGGCGCGAAAGCGTGGGGAGCAA  
ACAGGATTAGATACCCCCGTAGTCC

>Otu4409

CCAGCCTACGGGTTGCTCCAGTGGGGAATATTGGACAATGGGCGCAAGCCTGATCCAGCC  
ATGCCGCGTGAGTGATGACGGCCTTAGGGTTGTAAAGCTCTTTCGCACGCGACGATAATG  
ACGGTAGCGTGAGAAGAAGCCCCGGCTAACTTCGTGCCAGCAGCCGCGGTAATACGAAGG  
GGGCTAGCGTTGTTTCGGAATTACTGGGCGTAAAGCGTGCGCAGGCGGTTATGTAAGACAG  
ATGTGAAATGCCCGGGCTTAACCTGGGAACGCGTTTGTGACTGCATGGCTAGAATCTAG  
CAGAGGGGGGTAGAATTCACAGTGTAGCAGTGAAATGCGTAGATATGTGGAGGAATACCG  
ATGGCGAAGGCGCCCCCTGGGCTAAGATTGACGCTCATGCACGAAAGCGTGGGGAGCAA  
ACAGGATTAGAGACCCTAGTAGTTCC

>Otu4411

CCAGCCTATGGGATGCTGCAGTAGGGAATATTGCGCAATGGGGGAAACCCTGACGCAGCG  
ACGCCGCGTGAGCGATGAAGGCCTTCGGGTCGTAAAGCTCTGTTGAACGGGACAAAAAAA  
ATGATGGTACCGTTTCGAGAAAAGATCGGCTAACTTCGTGCCAGCAGCCGCGGTAAGACGA  
GGGATCCTAGCGTTGTTTCGGAATCATTGGGCGTAAAGCGTGCGTAGGTGGCCTGGTAAAGT  
CAGGTGTGAAAGCCCCGAGCTCAACTCGGGAAGTGCATCTGATACTGCTGGGCTTGAGTA  
CTGAAGAGGGTAGTAGAATTCCTGGTGTAGTGGTGAATACGTAGATATCAGGAGGAATA  
CCGGTGGCGAAGGCGGCTACCTGGTTCATGTACTGACACTGAGGCACGAAAGCGTGGGGAT  
CAAACAGGATTAGATACCCAGTAGTCC

>Otu4415

CCAGCCTACGGGTCGCAGCAGTGGGGAATTTTGGACAATGGGCGAAAGCCTGATCCAGCG  
ACGCCGCGTGAGTGAAGAAGGCCTTCGGGTTGTAAAGCTCTTTCGTTAGGGAAGATAATG  
ACGGTACCTAAATAAGAAGCTCCGGCTAACTTCGTGCCAGCAGCCGCGGTAATACGAAGG  
GAGCTAGCGTTACTCGGAATCACTGGGCGTAAAGCGTGCGTAGGCGGCTTTGTAAGTCAG  
AAGTGAAATCCAGGGGCTCAACCCAGAACTGCTTTTGAAACTGCAAGGCTAGAGTATCA  
TAGGGGATGGCGGAATTTCTAGTGTAGAGGTGAAATTCGTAGATATTAGAAGGAACACCG  
GTGGCGAAGGCGGCCATCTGGATGATAACTGACGCTGTTGCACGAAAGCGTGGGGAGCAA  
ACAGGATTAGATACCCGCGTAGTCC

>Otu4422

CCAGCCTACGGGTGGCACCAGTGGGGAATTTTTCGTAATGGGCGAAAGCCTGACGCAGCA  
ACGCCGCGTGATGATGAAGTCTTCGGATCGTAAAGCACTTTCGACCGGGAAGAAACGC  
TGTTGGCTAACATCCAGCAGTCTGACGGTACCGGAGAAGAAGCACCGGCTAACTCTGTG  
CCAGCAGCCGCGGTAATACAGAGGGTGCAAGCGTTGTTTCGGAATTATTGGGCGTAAAGCG  
CGTGTAGGCGGCTTAGCAAGTCGGGTGTGAAAGCCCTCGGCTCAACCGAGGAAGTGCGCC  
CGAACTGCAGAGCTTGAGTACCGGAGAGGATGGCGGAATTCCTCAAGTAGAGGTGAAAT  
TCGTAGATATGGGGAGGAACACCGGTGGCGAAGGCGGCCATCTGGACGGATACTGACGCT  
GAGACGCGAAAGCGTGGGGAGCAAACAGGATTAGAAACCCCGGTAGTCC

>Otu4423

CCAGCCTACGGGGGGCAGCAGTTAGGAATCTTTCGCAATGGGCGAAAGCCTGACGCAGCC  
ATGCCGCGTGAAATGATGAAGTCTTAGGATTGTAAATTCCTTTCAGCGGGGACGATAATG  
ACGGTACCTGTAGAAGAAGCTCCGGCTAACTTCGTGCCAGCAGCCGCGGTAATACGAAGG  
GGGCTAGCGTTGTTTCGGAATTACTGGGCGTAAAGCGCGCGCAGGCGGCTTCTCAAGTCAG  
GGGTGAAAGCCCAGAGCTCAACTCTGGAACGCCCTTGAACTGTGGAGCTTGAGTACGG  
GAGAGGTGAGTGGAATTCACAGTGTAGAGGTGAAATTCGTAGATATTGGGAAGAACACCG

GTGGCGAAGGCGGCTCACTGGCCCCGTTACTGACGCTCAGGCGCGACAGCGTGGGGATCAA  
ACAGGATTAGAGACCCCTCGTAGTCC  
>Otu4441  
CCAGCCTACGGGTGGCACCAGTGGGGAATTTTGC GCAATGGGGGAAACCCTGACGCAGCA  
ACGCCGCGTGAGGATGAAGTACTTCGGTACGTAAACTCCTTTTCGATCGGGACGATTATG  
ACGGTACCGGAAGAAGAAGCCCCGGCTAACTTCGTGCCAGCAGCCGCGGTAATACGAGGG  
GGGCAAGCGTTGTTTCGGAATTATTGGGCGTAAAGGGTGTGTAGGCGGTTTGGTAAGTCTC  
TTGTGAAATCTTCAGGCTCAACTTGAAGACTGCAAGGGAAACTGCCGGGCTTGAGTATGG  
GAGAGGTGAGTGGAATTCCTGGTGTAGCGGTGAAATGCGTAGATATCAGGAGGAACACCT  
GTGGCGAAAGCGGCTCACTGGACCATAACTGACGCTGATGCACGAAAGCTAGGGGAGCAA  
ACAGGATTAGAAACCCCGTAGTCC  
>Otu4442  
CCAGCCTACGGGGTGCACCAGTAGGGAATATTGGGCAATGGAGGGAACCTGACCCAGCC  
ATGCCGCGTG CAGGACGAAGGAGCTATGCTCTGTAAACTGCTTTAGCAGGGGAAGAAAAG  
GCGTCTGCGGACGAGATTGACGGTACCCTGAGAATAAGCACCGGCTAACTACGTGCCAGC  
AGCCGCGGTAATACGTAGGGTGCAAGCGTTGTCCGGATTTATTAGGTTTAAAGGGTGC GT  
AGGCGGCTTTTATAAGTCAGTGTTTAAAGCACATAGCTCAACTATGGA ACTGGCATTGATA  
CTGTAGAGCTTGAGTAGAAACGGGGCAGGCGGAATTTATGGTGTAGCGGTGAAATGCATA  
GATACCATAAAGAACACCGATAGCGAAGGCAGCTTGCCAGGATCTAACTGACGCTGAGGC  
ACGAAAGCGTGGGGATCAAACAGGATTAGATACCC CAGTAGTCC  
>Otu4443  
CCAGCCTATGGGTGGCACCAGTAAGGGATATTGC GCAATGGGCGAAAGCCTGACGCAGCA  
ACGCCGCGTGAGGAAGAAGGCCTTCGGGTCGTAAACTCCTTTGGACGGAGACGAGGAAG  
GACGGTATCCGTCGAACAAGTCACGGCTAACTACGTGCCAGCAGCCGCGGTA AAACGTAG  
GTGGCAAGCGTTATCCGGATTTACTGGGCGTAAAGCGTGTGCAGGCTGTTACCAAGTGG  
TGTATGAAATCGCTCAGCTCAACTGGGCGCGGTTATGCCAGACTGGTGGACTGGAGTCTG  
AAAGAGGGTGGTGGAATTCGGGTGTAGTGGTGAAATGCGTAGAGATCCGGAGGAACCCC  
AGAGGCGAAGGCGGCCACCTGGTTCAGCACTGACGCTCAGACACGACAGCATGGGGAGCG  
AACGGGATTAGATACCCCTGTAGTCC  
>Otu4449  
CCAGCCTATGGGAGGCACCAGTGGGGAATATTGGGCAATGGACGAAAGTCTGACCCAGCC  
ATGCCGCGTGAAATGATGAAGGCTTTAGGGTTGTAAAGTTCCTTTGCGCGATGAAGATAATG  
ACGGTAGTCGGAGAAGAAGCCCCGGCTAACTTCGTGCCAGCAGCCGCGGTAATACGAAGG  
GGGCTAGCGTTGTTTCGGAATTACTGGGCGTAAAGCGCGCGTAGGCTGTGCTACAAGCCAG  
AGGTGAAATCCCGGAGCTTAACTTCGGA ACTGCCTTTGAAACTGTAGTGCTGGAATCTCA  
GAGGGGGTAGCGGAATTCCAAATGTAGGGGTGAAATCCGTAGATATTTGGAGGAACACCG  
GTGGCGAAGGCGGCTACCTGGCTGAGTATTGACGCTGAGGCGCGAAAGCGTGGGGAGCAA  
ACAGGATTAGAGACCCCGTAGTCC  
>Otu4453  
CCAGCCTATGGGTGGCACCAGTCGAGAATCTTCCACAATGGACGAAAGTCTGATGGAGCG  
ACGCCGCGTG CAGGATGAAGTGCTTCGGTATGTAAACTGCTTTTACGGGGGACGAAGTTT  
ATTGACGGTACCCCGAGAATAAGAGGTTGCTAAACTCGTGCCAGCAGCAGCGGTAATACG  
AGTGCCCTCAAGCGTTATCCGGAATTATTGGGCGTAAAGGGTGTGTAGGTGGTCATGTTAG  
TCTTTTGTTAAATCTTCGGCTCAACCGGGGGCATGCAAAGGAAACGGCAGCACTAGAGG  
ATGCGAGAGGCATATGGA ACTCATGGTGTAGGGGTGAAATCCGTTGATATCATGGGGAAC  
ACCGAAAGCGAAGGCAGTATGCTGGCGCATTCCTGACACTCAAACACGAAAGCGTGGGTA  
GCGAATGGGATTAGATACCCCGTAGTCC  
>Otu4454  
CCAGCCTATGGGGGGCTCCAGTTTCGAATCATT CACAATGGGCGCAAGCCTGATGGTGCG  
ACGCCGCGTGAGGGATGAAGGCCTTCGGGTGTAAACCTCTGT CACCGGGGAAGAAACGT  
TTCAAGTTAACAGCTTGAAGCCTGACTTAAACCGGAGAGGAAGCAGTGGCTAACTCTGTG  
CCAGCAGCCGCGGTAATACAGAGACTGCAAGCGTTATTCCGATTCACTGGGCGTAAAGGG  
TGCGCAGGCGGTTGAGTGTGTCAGATGTGAAATCCCGAGGCTCAACCTCGGAACTGCGTC  
TGAAACTACTCGACTAGAGTACTGGAGAGGGTAACGGAATTCACGGTGTAGCAGTGAAAT  
GCGTAGATATCGTGAGGAACACCAGAGGCGAAGGCGGTTACCTGGACAGTTACTGACGCT  
CAGGCACGAAAGCATGGGGAGCAAAAGGGATTAGAAACCC CAGTAGTCC  
>Otu4456  
CCAGCCTACGGGTGGCTGCAGTGGGGAATCTTGC GCAATGGGCGAAAGCCTGACGCAGCG



ACGCCGCGTGGGTGATGAAGGCCTTCGGGTTGTAAAGCCCTGTGGGGAGGAGTGAATAAG  
GCTTGGTTAATAGCCGGGTCGATGACGGTACCTCCTTAGCAAGCTCCGGCTAACTCTGTG  
CCAGCAGCCGCGGTAATACAGAGGGTGCGAACGTTGTTTCGGAATTACTGGGCGTAAAGCG  
CGTGTAGGCGGTCTGAAAAGTCGGATGTGAAAACCCTGGGCTCAACCCGGAAGCGCATTT  
CGATACTGTTCGACTGGAGTCCCGGAGAGGATGGTGGAACTCTCGGTGTAGAGGTGAAAT  
TCGTAGATATCGGGAAGAACATCGGTGGCGAAGGCGGCCATCTGGACGGTGAAGTACGCT  
GAGACGCGAAAGCGTGGGGAGCAAACAGGATTAGAAACCCTAGTAGTCC

>Otu4457

CCAGCCTATGGGGGGCAGCAGTGAGGGATATTGCACAATGGGGGAAACCCTGATGCAGCG  
ACGCCGCGTGGGTGATGAAGGGCTTCGGCTCGTAAAACCCTTTTGCCACTGACGAGAACG  
GACGGTAGGTGGCGAATAAGCCTCGGCTAACTACGTGCCAGCAGCCGCGGTAAAACGTAG  
GAGGCAAGCGTTATCCGGAGTTACTGGGCGTAAAGCGTGCGTAGGCGGTGGTGTAAAGTG  
GACGTGAAAGCTTCGGGCTAAACTGGAAGAGGACGACTCAGACTGCACGACTAGAACGGG  
TCAGAGGTTTCGCGGAATTTCGGGGTGTAGCGGTGAAATGTGTAGAGATCCCGAGGAACACC  
AGTGGTGCAAACGCGGACTGGGACTTTGTTGACGCTGAGGCACGAAAGCGTGGGGAGCG  
AACGGGATTAGATACCCCCGTAGTCC

>Otu4460

CCAGCCTATGGGTGGCTGCAGTCGAGAATTTTTCTCAATGGGCGAAAGCCTGAAGGAGTG  
ACGCCGCGTGGGGGATGAAGGGCTTCGGCTCGTAAACCCTGTCAATTTGCGAACAAACCT  
TGCAGTTTAACAGATTGCAAGCTGATTGTAGCAGAAGAGGAAGGGACGGCTAACTCTGTG  
CCAGCAGCCGCGGTAATACAGAGGTCCCAAGCGTTGTTTCGGATTCACTGGGCGTAAAGGG  
TGCGTAGGTGGCAGGGTAAGTTTGATGTGAAATCTCCGGGCTTAACCCGAAACTGCATT  
GAATACTATCCTGCTAGAGGATTGGAGGGGGGACTGGAATACTTGGTGTAGCAGTGAAAT  
GCGTAGATATCAAGTGGAACACCAGTGGCGAAGGCGAGTCCCTGGACAATACCTGACACT  
GAGGCACGAAAGCTAGGGGAGCAAACAGGATTAGATACCCCTGTAGTCC

>Otu4461

CCAGCCTATGGGAGGCTGCAGTCGAGGATCATTCGCAATGGGCGAAAGCCTGACGATGCG  
ACGCTGCGTGGAGGATGAAGGCCTTCGGGTTGTAAACTCCTGTCAATGAGGGGAAAAGGTG  
CCGGGTGTTAATAGCATCCGGCCTCGATAGTACCTCAAGAGGAAGCCACGGCTAACTCTG  
TGCCAGCAGCCGCGGTAATACAGAGGTGGCGAGCGTTGTTTCGGATTTACTGGGCGTAAAG  
GGCGCGTAGGCGGTTTTGGTATGTTCGAGTGTGAAATCTCCAGGCTCAACCTGGAAAGTGCG  
CTCGAAACTGCTGAACTCGAGCATGGGAGGGGAGAGCGGAATACACGGTGTAGCGGTGAA  
ATGCGTTGATATCGTGTAGAACACCGGTGGCGAAGGCGGCTCTCTGGAACATTGCTGACG  
CTGAGGCGCGAAAGTTGGGGGAGCAAACAGGATTAGAAACCCTAGTAGTCC

>Otu4465

CCAGCCTACGGGAGGCAGCAGTCGAGAATTTTTCTCAATGGGCGAAAGCCTGAAGGAGCG  
ACGCCGCGTGGGGGATGAATGGCTTCGGCCCGTAAACCCTGTCAATTTGCGAACAAATTG  
ACTCGCCTAACACGTGTGTCAATTGATTGTAGCGGAAGAGGAAGGGACGGCTAACTCTGTG  
CCAGCAGCCGCGGTAATACAGAGGTCCCAAGCGTTGTTTCGGATTCACTGGGCGTAAAGGG  
TGCGTAGGTGGTGAGGTAAGTCGGATGTGAAAGCTCGGAGCTCAACTCTGAAATGGCATT  
GGAAACTACCTGACTGGAGGGTCGGAGGGGGGACTGGAATTCTCGGTGTAGCAGTGAAAT  
GCGTAGATATCGAGAGGAACACCAGTGGCGAAGGCGAGTCCCTGGACGACTCCTGACACT  
GAGGCACGAAAGCTAGGGGAGCAAACAGGATTAGATACCCGTGTAGTCC

>Otu4466

CTAGCCTATGGGGGGCAGCAGTGGGGAATTTTGGACAATGGGCGCAAGCCTGATCCAGCA  
ATGCCGCGTGCAGGATGAAGGCCTTCGGGTTGTAAACTGCTTTTGTACGAGCGAAAAGG  
TTCTTGCTAATACCAGGGACACATGACGGTACCGTAAGAATAAGCACCGGCTAACTACGT  
GCCAGCAGCCGCGGTAATACGTAGGGTGCAAGCGTTAATCGGAATTACTGGGCGTAAAGC  
GTGCGCAGGCGGTTTTGTAAAGACAGATGTGAAAACCCCGGGCTCAACCTGGGAACTGCAT  
TTGTGACTGCAAAGCTAGAGTACGGCAGAGGGGGATGGAATTCGCGGTGTAGCAGTGAAA  
TGCGTAGATATGCGGAGGAACCGCGATGGCGAAGGCAATCCCCCGGGCCTGTACTGACGC  
TCATGCACGAAAGCGTGGGGAGCAAACAGGATTAGATACCCCGTAGTCC

>Otu4473

CCAGCCTACGGGGCGCTGCAGTGGGGAATATTGGACAATGGGCGAAAGCCTGATCCAGCA  
ATGCCGCGTGTGTGAAGAAGGTCTTAGGATTGTAAAGCACTTTCGGCGGGGACGATGATG  
ACGGTACCCGCGAGAAGAAGCCCCGGCTAACTTCGTGCCAGCAGCCGCGGTAATACGAAGG  
GGGCTAGCGTTGCTCGGAATGACTGGGCGTAAAGGGCGCGTAGGCGGATGATTTAGTTAG  
GTGTGAAATTCCTGGGCTTAACCTTGGGGACTGCACTTAATACAGGTCTGTAGAGTGGGA

TAGAGGGTTGTGGAATTCCTCAGTGTAGAGGTGAAATTCGTAGATATTGGGAAGAACACCG  
GTGGCGAAGGCGGCAACCTGGATCTTTACTGACGCTGAGGCGCGAAAGCGTGGGGAGCAA  
ACAGGATTAGAGACCCCTGTAGTCC

>Otu4474

CCAGCCTATGGGTGGCTCCAGGCGCGAAACCTCCACAATGCGCGAAAGCGTGATGGGGGG  
ATTCCGAGTGCTTACATTTTATGTAAGCTTTTGCCAAGAGTTCACATCTTGGAGAATAAG  
TGGTGGGTAAGACCGGTGCCAGCAGCCGCGGTAACCCCGGCGCCACGAGTGGCAATCTTA  
TATTGGGCCTAAAGCATTTCGTAGCAGGTTTGAAAAATCCTTTGTGAAATTGTTGAACTCA  
ATACAACAGCGTGCAGGGGACACTTTCAGACTAGAGACTGAGAGGAGTTGGGGGTATGCC  
TTGGGGAGCGGTTAAATGTGATAATCCAAGGTAGACCACCTGTGGCGAAGGCGCCCACT  
AGAACAGTTCTGACTGTGAGGGATGAAAGCTAGGGGAGCGATCCGGATTAGAGACCCCTGG  
TAGTCC

>Otu4477

CCAGCCTATGGGAGGCAGCAGTCGAGAATCTTCCACAATGGACGAAAGTCTGATGGAGCG  
ACGCCGCGTGGGGGACGAAGGTCTTCGGATTGTAAACCCCTGTCACTGGGGAAGAAACGC  
TTTGAATTAATCGTTCAAAGCCTGACTTAACCCGAGAGGAAGCAGTGGCTAACTCTGTG  
CCAGCAGCCGCGGTAATGCAGAGACTGCAAGCGTTATTTCGGATTCACTGGGCGTAAAGGG  
TGCGCAGGCGGCCAGGTGTGTCAGGTGTGAAAGCCCGAGGCTTAACCTCGGAATTGCGCC  
TGAAACTGCTTGGCTAGAGCATTGGAGAGGGTAGCGGAATTCACGGTGTAGCAGTGAAAT  
GCGTAGATATCGTGAGGAACACCAGAGGCGAAGGCGGCTACCTGGACAATTGCTGACGCT  
CAGGCACGAAAGCGTGGGGAGCAAAAGGGATTAGAAACCCGAGTAGTCC

>Otu4478

CCAGCGTGGCAGCAGCAAGGAATTTTCGGCAATGGGGGAAACCCTGACCGAGCAACGCCG  
CGTGGGCGACGAAGTCCTTCGGGATGTAAAGCCCTTTTCTGTGGGAAGAAAAAGGACGGT  
ACCACAGGAATAAGCATCGGCTAACTACGTGCCAGCAGCCGCGGTAATACGTAGGATGCA  
AGCGTTGTCCGGATTTACTGGGCGTAAAGGGCGCGCAGGCGGTATAGCAAGTCTATCGTG  
AAAGCCCCCGGCTAAACCGGGGAGGGTTCGGTAGATACTGCTAAACTAGAGTGCAGCAGAG  
GATAGTGGAATTCCCGGTGTAGTGGTGAAATGCGTAGATATCGGGAGGAACACCAGTGGC  
GAAAGCGGCTATCTGGGCTGTAAGTACGCTGAGGCGCGAAAGCTAGGGGAGCAAAACAGG  
ATTAGATACCCCTAGTAGTCC

>Otu4490

CCAGCCTACGGGGGGCACCAGTGGGGAATCTTGGACAATGGGGGCAACCCTGATTCAGCC  
ATGCCGCGTGAGTGAAGAAGGCCTTAGGGTTGTAAAGCTCTTTCGCACGTGACGATAATG  
ACGGTACCCGTAGAATAAGCTCCGGCTAACTTCGTGCCAGCAGCCGCGGTAATACGAAGG  
GAGCTAGCGTTGTTTCGGAATTACTGGGCGTAAAGGGCGCGTAGGCGGTTTCGACAAGTTGG  
ATGTGAAAGCCCTGGGCTCAACCCGGGAATTGCATTCAATACTGTCTTACTTGAATTCGG  
TAGAGGTTGGTAGAATTCCCACTGTAGAGGTGAAATTCGTAGATATTGGGAAGAATAACC  
GTGGCGAAGGCGGCCAACTGGACCGACATTGACGCTGAGGCGCGAAAGCGTGGGGAGCAA  
ACAGGATTAGATACCCTCGTAGTCC

>Otu4491

CCAGCCTATGGGGTGCTCCAGTCGAGAATTTTCTCAATGGGCGAAAGCCTGAAGGAGCG  
ACGCCGCGTGGGGGATGAATGGCTTCGGCCCGTAAACCCCTGTCAATTTGTGAACAAATTG  
CTTACCCAACACGTGAAGCATTGATTGTAAACGGAAGAGGAAGGGACGGCTAACTCTGTG  
CCAGCAGCCGCGGTAATACAGAGGTCCCAAGCGTTGTTTCGGAATCACTGGGCGTAAAGGG  
TGCGTAGGCGGGTTTTTAAGTCAGGGGTGAAATCCTGGAGCTCAACTCCAGAAGTGCCTT  
TGATACTGAAGATCTTGAGTCCGGGAGAGGTGAGTGAAGTGCAGAGTGTAGAGGTGAAAT  
TCGTAGATATTCGCAAGAACACCAGTGGCGAAGGCGGCTCACTGGCCCGGTACTGACGCT  
GAGGCACGAAAGCGTGGGGAGCAAAACAGGATTAGATACCCTCGTAGTCC

>Otu4493

CCAGCCTATGGGTGGCAGCAGTGGGGAATTTTCGCAATGGGCGAAAGCCTGACGGAGCA  
AGACCGCGTGAGGGAGGAAGGCTCTTGGGTGTAAACCTCTTTTCTCAGGGAAGAAGCTC  
TGACGGTACCTGAGGAATCAGCATCGGCTAACTCCGTGCCAGCAGCCGCGGTAATACGGA  
GGATGCAAGCGTTATCCGGAATCATTGGGCGTAAAGCGTTCGTAGGTGGCTAGTCAAGTC  
TGCTGTCAAAGGCTGGGGCTTAACTCCAGAAAGGCAGTGGAAGTGAAGTGGCTAGAGTGC  
GGTAGGGGTAGAGGGAATTCCCGGTGTAGCGGTGAAATGCGTAGAGCTCGGGAAGAACAC  
CGGTGGCGAAAGCGCTCTGCTGGGCCTGCACTGACACTGAGGGACGAAAGCTAGGGGAGC  
GAATGGGATTAGAAACCCGTGTAGTCC

>Otu4494

CCAGCCTATGGGTCGCTGCAGTAGGGAATATTGCACAATGGAGGAACTCTGATGCAGCG  
ACGCCGCGTGAGTGACGAAGGACTTCGGTTCGTAAAGCTCTGTTGCATGGGAATAAGAAA  
GTGAATGTACCCCTGTGAGGAAGGGTCGGCTAACTTCGTGCCAGCAGCCGCGGTAAGACGA  
GGGACCCTAGCGTTGTTTCGGAATCATTGGGCGTAAAGCGGTGGCAGGTGGCTTGGTAAGT  
CAGGTGTGAAAGCCCTGGGCTCAACCCAGGAAGTGCATTTGATACTGCTGAGCTTGAGTG  
CTGGAGAGGCTACTAGAATTCCTGGTGTAGTGGTGAAATACGTAGATATCAGGAGGAATA  
CCGGAGGCGAAGGCGGGTAGCTGGCCAGACACTGACACTCATCACCGAAAGCGTGGGGAT  
CAAACAGGATTAGATACCCGCGTAGTCC

>Otu4496

CCAGCCTACGGGGTGCTGCAGTGGGGAGTCTTGCGCAATGGACGAAAGTCTGACGCAGCC  
ACGCCGCGTGAGTGAAGAAGGCCTTCGGGTGTAAAGCTCTGTCTGGGAGGGACGAAAATG  
CTTTTAGTGAATAGCTGAGAGTACTGACGGTACCTCCAAAGGAAGCACCGGCTAACTTCG  
TGCCAGCAGCCGCGGTAATACGAAGGGTGCAAGCGTTGCTCGGAATTATTGGGCGTAAAG  
GGTAGGTAGGTGGTTTCATTTGTCTGGGGTGAAAGCCTTTGGCTTAACCAAAGAAGTGCC  
CCGGAACCGGTGGAAGTAGAGTGCTAGAGAGGGTTCGTGGAATTCCCGGTGTAGCGGTGAA  
ATGCGTAGAGATCGGGAGGAACACCAGAGGCGAAGGCGACGACCTGGATAGCAACTGACA  
CTCAACTACGAAAGCGTGGGGAGCAAACAGGATTAGATACCCCTGTAGTCC

>Otu4497

CCAGCCTATGGGATGCAGCAGTGAGGAATTATGCGCAATGGGGGAAACCCTGACGCAGCC  
ACGCCGCGTGAGTGAAGAAGGCCTTCGGGTGTAAAGCTCTGTCTGGGAGGGACAAAAACC  
TTTTGGGTAAATAGCCTAAGAGCTTGATGGTACCCTCAAAGGAAGCACCGGCTAACTTCG  
TGCCAGCAGCCGCGGTAATACGAAGGGTGCAAGCGTTGCTCGGAATTATTGGGCGTAAAG  
GGTAGGTAGGTGGTGGCAAAAGTCTGAGGTGAAATCCCCGAGCTTAACTCGGGACGTGCC  
TTGGAAACTTTGTCACTAGAGTACTAGAGAGGTTTCGTGGAATTCCCGGTGTAGCGGTGAA  
ATGCGTAGAGATCGGGAGGAACATCAGTGGCGAAGGCGACGAACTGGATAGTAACTGACA  
CTCAACTACGAAAGCGTGGGGAGCAAACAGGATTAGAAACCCGTGTAGTCC

>Otu4498

CCAGCCTATGGGACGCAGCAGTTCGGAATATTTCGGCAATGGGCGAAAGCCTGACCGAGCG  
ACGCCGCGTGCGGGATGAAGGTCCTTGGGTGTAAACCGCTGTCACAGGTGAGCAAAATTA  
CGGAGAGTCAACAACTCGCCGTATTGAGTTAAGCTTGAGAGGAAGCCCCCGCTAATCACG  
TGCCAGCAGCGCGGTAATACGTGAGGGGCGAACGTTGTTTCGGTGTCACTGGGCTTAAAG  
GGCGCGTAGGTGGCTGCGTAAGTAAGGTGTGAAAGCCCTCGGCTTACCCGGGGAATTGCG  
CCTTATACTGCGTGGCTTGAGGGTCATAGGGGAAGGGGGAAGTCCAGGTGTAGCGGTGAA  
ATGCGCAGATATCTGGGGGAAGGCCGGCGCGCAAGGCGCCCTTCTGGGTGATTCTCTGACA  
CTGAGGCGCGAAAGCGTGGGGAGCAAACAGGATTAGAAACCCCTCGTAGTCC

>Otu4501

CCAGCCTACGGGATGCTGCAGTGGGGAATATTGGGCAATGGGCGCAAGCCTGACCCAGCC  
ATGCCGCGTGAGTGATGAAGGCCTTCGGGTTCGTAAAGCTCTGTGGGAAGGGACGAAAAA  
CGGGTGCTAATACCACTCGGCTTGACGGTACCTTCTTAGCAAGCACCGGCTAACTCCGTG  
CCAGCGGCCGCGGTAATACGGAGGGTGCAAACGTTGCTCGGAATTATTGGGCGTAAAGCG  
CACGTAGGCGGTTTCGCTATGTCGGATGTGAAAGCCCTCGGCTTAAACCGAGGAAGTGCACC  
TGAAACTGGCGAGCTTGAGTACGGAAGAGGGTCTCGGAATTCCCGGTGTAGAGGTGAAAT  
TCGTAGATATCGGGAGGAACACCAGTGGCGAAGACGGAGACCTGGGCCGATACTGACGCT  
GAGGTGCGAAAGCGTGGGGAGCAAACAGGATTAGATACCCCTAGTAGTCC

>Otu4506

CCAGCCTATGGGAGGCAGCAGTGGGGAATATTGGGCAATGGGCGCAAGCCTGACCCAGCC  
ATGCCGCGTGAGTGATGAAGGCCTTCGGGTTCGTAAAGCTCTGTGGGAGGGACGAAAACG  
ATGCGGAAGAAACGACGCATCCTTGACGGTACCTCCTTAGCAAGCACCGGTTAACTCTGT  
GCCAGCAGCCGCGGTAATACAGAGGGTGCGAACGTTGCTCGGAATTACTGGGCGTAAAGC  
GCGTGTAGGCGGATCCGTAAGTCAGGCGTGAAATCCCCAGGCTCAACCTGGGAACTGCGC  
TTGAAACTGCGGGTCTTGAGTGTCTGGAGAGGGTGGCGGAATTCCTGGTGTAGAGGTGAAA  
TTCGTAGATATCAGGAGGAACACCGGTGGCGAAGGCGGCCACCTGGACGACAACCTGACGC  
TGAGACGCGAAAGCGTGGGGAGCAAACAGGATTAGAACCCGAGTAGTCC

>Otu4507

CCAGCCTATGGGTCGCTCCAGCGAGGAATTTTCCGCAATGGACGAAAGTCTGACGGAGCA  
ACGCCGCGTGGGTGAAGAAGTTTTTCGGAATGTAAACCCTTTTTCTGTGGGAAGAAAGAA  
AGACGGTGCCACAGGAATAAGCATCGGCTAACTACGTGCCAGCAGCCGCGGTAATACGTA  
GGATGCAAGCGTTGTCCGGAATTACTGGGCGTAAAGGGCGAGTAGGCGGCCTGCCAAGTC

CGATGTGAAAGCTCCCGGCTTAACTGGGAGAGGCCATTGGAAACTGGCAAGCTGGAGTGC  
AGGAGAGGCTAACGGAATTCCCGGTGTAGTGGTGAAATGCGTAGATATCGGGAGGAACAC  
CAGTGGCGAAGGCGGTTAGCTGGCCTGTAACCTGACGCTGAGGCGCGAAGGCTAGGGGAGC  
AAACAGGATTAGAAACCCAGTAGTCC

>Otu4509

CCAGCCTACGGGAGGCTGCAGTGGGGAATATTGGACAATGGGCGAAAGCCTGATGCAGCC  
ATGCCGCGTGTGTGAAGAAGGCCTTCGGGTGTAAAGCACTTTCAGCGAGGAGGAAGGCA  
TCATACTTAATACGTGTGGTGATTGACGTTACTCGCAGAAGAAGCACCGGCTAACTCCGT  
GCCAGCAGCCGCGGTAATACGGAGGGTGCAAGCGTTAATCGGAATTACTGGGCGTAAAGC  
GCACGCAGGCGGTTTTGTTAAGTCAGATGTGAAATCCCCGCGCTTAACGTGGGAACTGCAT  
TTGAAACTGGCAAGCTAGAGTCTTGTAGAGGGGGGTAGAATTCCAGGTGTAGCGGTGAAA  
TGCGTAGAGATCTGGAGGAATACCGGTGGCGAAGGCGGCCCCCTGGACAAAGACTGACGC  
TCAGGTGCGAAAGCGTGGGGAGCAAACAGGATTAGAGACCCCGTAGTCC

>Otu4512

GGACTACGAGGGTTTTCTAATCCTGTTTGATCCCCACGCTTTCGGGTCTGAGTGTGAGTGT  
CTGGCCAGTTACCCGCTTCGCCTCCGGTATTCTCCTGATATCTACGTATTTACCCT  
ACACCAGGAATTCTAGTAACCTCTCCAGCACTCAAGCTTCGCAGTATCAAACGCCTTCC  
AAGGTTAAGCCCTGGGCTTTCACGTCTGACTTACAAAGCAACCTACACCCGCTTTACGCC  
CAATAATTCCGAACAACGCTAGGGTCCCTCGTCTTACCGCGGCTGCTGGCACGAAGTTAG  
CCGACCCCTTCTCGCAAAGTACCTTCATTTTTTTTATTCCCTTGCAACAGAGCTTTACGAA  
CCGAAGTCCTTCATCACTCACGCGGCGTCGCTGCATCAGAGTTTCTCCATTGTGCAATA  
TTCCCTACTGCTGCACCCCGTAGGCTG

>Otu4514

CCAGCCTATGGGGCGCACCAGTGAGGAATTTTGCACAATGGGGGAAACCCTGATGCAGCA  
ACGCCGCGTGTATGATGAAGGGGCTATGCCTTGTAAGTACTGTGCGACAGGAAAAAAG  
TTCCCTTTGGGGACTGGGATTGTACTGTCAAAGGAAGGGTCGGCTAACTACGTGCCAGCA  
GCCGCGGTAATACGTAGGACCCAAGCGTTGTCCGGAATTACTGGGTGTAAAGGGTGCGTA  
GGCGGGCTTGCGCGTCGAAGGTTAAAGACCACAGCTTAACTGCGGAAGTGCCTTCGATAC  
GGTGAGTCTTGAATATGAGAGAGGTAAGTAGAATTCCTGGTGTAGCGGTGAAATGCGTAG  
ATATCAGGAGGAATACCAGTGGCGAAGGCGGCTTACTGGCTCATTATTGACGCTGAGGCA  
CGAAAGCGTGGGGATCAAACAGGATTAGAAACCCAGTAGTCC

>Otu4515

CCAGCCTATGGGTCGCACCAGTCGAGGATTTTTCTCAATGGGCGAAAGCCTGAAGGAGCG  
ACGCCGCGTGGGGGATGAAGGTCTTCGGATTGTAAACCCCTGTCATCTGGGAACAATGTG  
ATTACCTAACACGTGGATCATTGATAGTACCGGAAGAGGAAGCAGTGGCTAACTCTGTG  
CCAGCAGCCGCGGTAATACAGAGACTGCAAGCGTTGTTTCGGATTCAATTGGGCGTAAAGGG  
TCCGCAGGCGGTCTGTAAAGTCGGATGTGAAATCTCACAGCCTAACTGTGATAGGTCAAT  
CGAAACTGGCAGGCTCGAGGAGTGGAGAGGAGACTGGAATTGCTGGTGTAGCGGTGAAAT  
GCGTAGAGATCAGCAAGAACACCGGTGGCGAAGGCGAGTCTCTGGACACTTCCTGACGCT  
CAGGGACGAAAGCCAGGGGAGCAAACGGGATTAGAAACCCGTGTAGTCC

>Otu4518

CCAGCCTACGGGGGGGCTGCAGTGGGGAATTTTGCACAATGGGGGAAACCCTGATGCAGCA  
ACGCCGCGTGGAGGATGAAGTCCCTTGGGATGTAAACTCCTTTTCGACCGGGACGATAATG  
ACGGTACCGGTGGAAGAAGCCCCGGCTAACTCTGTGCCAGCAGCCGCGGTAATACGAGGG  
GGGCGAGCGTTGTTTCGGAATTATTGGGCGTAAAGGGTGCGTAGGCGGTTTGACAAGTCTG  
ATGTGAAATCCCGCAGCTTAACTGCGGAACGGCATTGGAAACTGTTTGACTAGAGGAATG  
GAGGGGAGACTGGAATACTTGGTGTAGCAGTGAAATGCGTAGATATCAAGTGAACACCA  
GTGGCGAAGGCGAGTCTCTGGACATTTCTGACGCTGAGGCACGAAAGCCAGGGGAGCAA  
ACGGGATTAGAAACCCTAGTAGTCC

>Otu4519

CCAGCCTACGGGGGGCAGCAGTTTCGAATCATTCACAATGGGCGCAAGCCTGATGGTGCG  
ACGCCGCGTGGGGGATGAAGGTCCTTGGAATTGTAAATCCCTGTCACCGGGGAAGAAACGT  
ACACACTTAACACGTGTGTGCCTGACTTAAACCGGAGAGGAAGCAGTGGCTAACTCTGTG  
CCAGCAGCCGCGGTAATACAGAGGCTGCAAGCGTTATTTCGGATTCACTGGGCGTAAAGGG  
TGCGCAGGCGGCCATGTGTGTTAGGCGTGAAAGCCCGAGGCTCAACCTCGGAATTGCACC  
TAAACTACATGGCTAGAGTACTGGAGAGGGTAGCAGAATTCATGGTGTAGCAGTGAAAT  
GCGTAGATATCATGAGGAATACCAATGGCGAAGGCAGCTACCTGGACAGTTACTGACGCT  
CAGGCACGAAAGCGTGGGGAGCAAAGGGATTAGAGACCCGAGTAGTCC

>Otu4520

CCAGCCTACGGGATGCTGCAGTCGAGGATCTTCGGCAATGGGCGCAAGCCTGACCGAGCG  
ACGCCGCGTGTGCGATGAAGGCCTTCGGGTGTAAAGCACTGTCGGGGGGGAGAAAGCCG  
CAAGGTTGATCGACCCCCGGAGGAAGCACGGGCTAAGTTCGTGCCAGCAGCCGCGGTAAG  
ACGAACCGTGCAACGTTGTTTCGGAATCACTGGGCTTAAAGGGCGCGTAGGCGGGCGATC  
CAGTCAAGGGTGAAATCCTGCGGCTTAACCGTAGAAGAGCCCCTGATACTGATTGTCTCG  
AGGGAGGTAGGGGCGTGTGGAACCTCCGGTGGAGCGGTGAAATGCGTAGATATCGGAAGG  
AACGCCGCTGGCGAAAGCGACGCGCTGGACCTCTTCTGACGCTGAGGCGCGAAAGCCAGG  
GGAGCAAACGGGATTAGAAACCCAGTAGTCC

>Otu4522

CCAGCCTACGGGAGGCTGCAGTGGGGAATTTTTCGCAATGGGCGAAAGCCTGACGCAACA  
ACGCCGCGTGGAGGACGAAGGTTTTTCGAATTGTAAACTCCTGTCCCGGGGGACGATAATG  
ACGGTACCCCGGGAGGAAGCCCCGGCTAACCTCGTGCCAGCAGCCGCGGTAATACGAGGG  
GGGCAAGCGTTGTTTCGGAATCATTGGGCGTAAAGGGCGCGTAGGCGGCCTGGGAAGTTCT  
GGGTGAAATCCCTCGGCTCAACCGAGGAAGTGCCTGGGAAACCACTGGGCTGGAGTGCTG  
GAGAGGGAAGCGGAATTCCTGGTGTAGCGGTGAAATGCGTAGAGATCAGGAGGAACATCT  
GAGGCGAAGGCGGCTTCCTGGACAGACACTGACGCTGAGGCGCGAAAGCCAGGGGAGCAA  
ACAGGATTAGATACCCTAGTAGTCC

>Otu4527

CCAGCCTACGGGTGGCACCAGCAAGGAATTTTCGGCAATGGGGGAAACCTGACCGAGCA  
ACGCCGCGTGGGCGACGAAGTCCTTCGGGATGTAAAGCCCTTTTCTGTGGGAAGACTAAG  
GACGGTACCACAGGAATAAGCACCGGCTAACTACGTGCCAGCAGCCGCGGTAATACGTAG  
GGTGCAAGCGTTGTCCGATTACTGGGCGTAAAGGGCGCGCAGGCGGCCTGATAAGTCA  
CTCGTGAAATTTCCCGGCTAAACTGGGAAGGGTCGAGTGATACTGTCAAGCTAGAGAGCA  
GCAGAGGATAGTAGAATTCCCGGTGTAGTGGTGAAATGCGTAGATATCGGGAGGAATACC  
AGTGGCGAAAGCGGCTATCTGGGCTGTGTCTGACGCTGAGGCGCGAAGGCTAGGGGAGCA  
AACAGGATTAGAAACCTCGTAGTCC

>Otu4531

CCAGCCTATGGGGCGCTGCAGTCGAGGATCTTCGGCAATGGGCGAAAGCCTGACCGAGCG  
ACGCCGCGTGCGGGATGAAGGCCTTCGGGTGTAAACCGCTGTCAGTGGGGAGGAGGAAA  
TTCCAAGGGGTCTCCCTTTGGATTGACCTATACTCAGAGGAAGGACGGGCTAAGTTCGT  
GCCAGCAGCCGCGGTAAGACGAACCGTCCAAACGTTATTCGGATTCACTGGGCTTAAAGG  
GTGCGTAGGCGGCTCAGAAAGTAGGGTGTGAAAGCCCTCGGCTCAACCGAGGAATTGCGC  
CCTAAACTACTGGGCTTGAGGAACGCAGAGGTAAGCGGAACCTAGGGTGGAGCGGTGAAA  
TGCGTTGATATCCTAAGGAACACCAGGAGCGAAAGCGGCTTACTGGGCGTTTTTCTGACGC  
TGAGGCACGAAAGCTAGGGGAGCGAACGGGATTAGATAACCCCGGTAGTCC

>Otu4532

CCAGCCTACGGGGGGCAGCAGTCGAGAATTTTTTCACAATGGGGGAAACCTGATGGAGCG  
ACGCCGCGTGGGGGATGAATGGCTTCGGCCCGTAAACCCCTGTCATTTGCGAACAAACCT  
CATGCATGAACAATGCATGAATTGATTGTAGCGGAAGAGGAAGGGACGGCTAACTCTGTG  
CCAGCAGCCGCGGTAATACAGAGGTCCCAAGCGTTGTTTCGGATTCACTGGGCGTAAAGGG  
TGCGTAGGTGGTCGGGTAAGTCTGATGTGAAATCTCGCAGCTTAACTGCGAAACTGCATT  
GGATACTATCCGGCTGGAGGATTGGAGGGGGGACTGGAATTCTTGGTGTAGCAGTGAAAT  
GCGTAGATATCAAGAGGAACACCAGTGGCGAAGGCGAGTCCCTGGACAATTCCTGACACT  
GAGGCACGAAAGCTAGGGGAGCAAACAGGATTAGAAACCCCGGTAGTCC

>Otu4536

CCAGCCTACGGGGGGCTGCAGTCGAGGATCTTCGTCAATGGGCGCAAGCCTGAACGAGCG  
ATGCCGCGTGCGCGATGAAGGCCTTCGGGTGTAAAGCGCTGTCGAGGGGGAGAAAAGCC  
GAAAGGTTTGATCTATCCCTGGAGGAAGCTCGGGCTAAGTTCGTGCCAGCAGCCGCGGCA  
AGACGAACCGAGCGAACGTTGTTTCGGAATCACTGGGCTTAAAGGGCGCGTAGGCGGGCTG  
TCAAGTCTGGGGTGAAATCCCGCGGCTCAACCGTGGAAGTGCCTCAGATACTGACGGCCT  
CGAGGGAGGTAGGGGCGAGCGGAACGGGTGGTGGAGCGGTGAAATGCGTTGATATCACTC  
GGAACCTCCGGTGGCGAAAGCGGCTCGCTGGATCTCTTCTGACGCTGAGGCGCGAAAGCTA  
GGGGAGCAAACGGGATTAGATAACCCGTGTAGTCC

>Otu4537

CCAGCCTACGGGAGGCTGCAGTAGGGAATATTGCGCAATGGAGGAAACTCTGACGCAGCG  
ACGCCACGTGGGTGATGAAGGTTTTTCGGATCGTAAAGCCCTGTCGGATGGGACGAAAAAC  
GAGGTGGCTAACATCCACTTCGCTTGACGGTACCATCAAAGGAAGCACCGGCTAACTACG

TGCCAGCAGCCGCGGTAATACGTAGGGTGCTAGCGTTGTTTCGGAATCATTGGGCGTAAAG  
CGCGTGTAGGCGGTTAGTAAAGTTGGGTGTGAAATCCCTGGGCTCAACCGAGGAAGTGCA  
TCCAAAACCTAACTAGCTAGAGAGTGGTAGAGGGAGGTGGAATTCCGTGTGTAGAGGTGAA  
ATTCTGTAGATATACGGAGGAATACCGGTGGCGAAGGCGGCCTCCTGGACCATTTCTGACG  
CTGAGACGCGAAAGCGTGGGGAGCAAACAGGATTAGATACCCCTGTAGTCC

>Otu4540

CCAGCCTACGGGGGGCTGCAGTGGGGAATATTGGGCAATGGAGGAACTCTGACCCAGCC  
ATGCCGCGTGAATGATGAAGGCCCTTAGGGTTGTAAAGTTCTTTCGCCGATGAAGATAATG  
ACGGTAGTCGGAGAAGAAGCCCCGGCTAACTTCGTGCCAGCAGCCGCGGTAATACGAAGG  
GGGCTAGCGTTGTTTCGGAATTACTGGGCGTAAAGCGAGCGTAGGTTGCTCGACAAGTCAG  
TGGTGAAAGCCCCAAGGCTCAACCTTGGAATGCCATTGAACTGTGAGCTGGAATCTTA  
GAGGGGGTAGCGGAATTCCAAATGTAGGGGTGAAATCCGTAGATATTTGGAGGAACACCG  
GTGGCGAAGGCGGCTACCTGGCTAAGTATTGACACTGAGGCTCGAAAGCGTGGGGATCAA  
ACAGGATTAGAGACCCTTGTAGTCC

>Otu4543

CCAGCCTACGGGGGGCTGCAGTTCGGAATATTTCGGCAATGGACGAAAGTCTGACCGAGCG  
ACGCCGCGTGC GGATGAAGGCCCTATGGGTGTAAACCGCTTTCGCGATTAGGTAAATC  
ACGGTTGATTAACAATTGACTGTGTTGAATAAGGATCGTAAAGAAGCCCCCGCTAATCAC  
GTGCCAGCAGCGGCGTAATACGTGAGGGGCGAACGTTGTTTCGGTGTCACTGGGCTTAAA  
GGGTGCGTAGGTGTTGCGTAAGTAACGTGTGAAATCCCTCGGCTTACCCGGGGAATTGC  
ACGTTATACTGCGTGACTTGAGGGCTAAAGGGGAAAAGGGAATCCAGGTGTAGCGGTGA  
AATGCGCAGATATCTGGGGGAAGGCCGGCGCGAAGGCGCTTTTCTGGTTAGTACCTGAC  
ACTGAGGCACGAAAGCGTGGGGAGCAAACAGGATTAGATACCCCTAGTAGTCC

>Otu4544

CCAGCCTATGGGGTGCTCCAGTCGAGAATCTTCCGCAATGGACGAAAGTCTGACGGAGCG  
ACGCCGCGTGGAGGATGAAGTGCTTCGGCATGTAAACTCCTTTTGCCAGGGAAAAAGTTT  
ATTGATTGTACCTGGAGAATAAGAAGTTGCTAAACTCGTGCCAGCAGCAGCGGTAATACG  
AGTGCTTCGAGCGTTATCCGGAATCATTGGGCGTAAAGGGTGTGTAGGCGGCGATGTTAG  
TCTCATGTAAAAATCCTTCGGCTCAACCGAGGGCTCGCACGAGAAACGGCATTGCTTAGAG  
GACGGAAGGGGTCTCTGGAATCATGGTGTAGCGGTGAAATGCGTTGATATCATGGGGAA  
CACAAAAGCGAAGGCAAGAGACTGGTCCGCTCCTGACGCTGAAACACGAAAGCGTGGGT  
CGCAATGGGATTAGATACCCCTGTAGTCC

>Otu4546

CCAGCCTACGGGGTGCTCCAGTGGGGAATATTGGACAATGGGGGCAACCCTGATCCAGCA  
ATGCCGCGTGAGTGATGAAGGCCCTTAGGGTTGTAAAGCTCTTTCGGGTGGGACGATGATG  
ACGGTACCACCAGAAGAAGCCCCGGCTAACTTCGTGCCAGCAGCCGCGGTAATACGAAGG  
GGGCTAGCGTTGTTTCGGAATTACTGGGCGTAAAGCGCACGCAGGCGGCGCTTAAATAAG  
GAGTGAAAGCCCTGGGCTCAACCCGGGAATTGCTCTTTAGACTGGCGCGCTAGAATTCGG  
AAGAGGGCAGTGGAATTCCAAGTGTAGAGGTGAAATTCGTAGATATTTGGAAGAACACCA  
GTGGCGAAGGCGACTGCCTGGTCCGATATTGACGCTCATGTGCGAAAGCGTGGGGAGCAA  
ACAGGATTAGAAACCCCTGTAGTCC

>Otu4547

CCAGCCTACGGGAGGCTGCAGCGACGAATCTTCCGCAATGGGCGAAAGCCTGACGGAGCG  
ATGCCGCGTGTGGGATGAAGCGGCTTTGCCGTGTAAACCACTGTCAGGAGAAAGGAATAT  
TGACCATCTCCAGAGGAAGGGGCGACTAACTCTGTGCCAGCAGTCGCGGTAATACAGAGG  
CCCCGAGCGTTAGTCGGAATCACTGGGCTTAAAGGGTGCCTAGGCGGCTGGATAAGTGTC  
GTGTGAAATCCCACTGCTCAACGGTGGAATGCACGGCAAATGTTTCGGCTAGAAGAATG  
TAGAGGTCGCTAGAACGCATGGTGGAGCGGTGGAATGCGTAGATATCATGCGGAATGCCA  
AAGGTGAAGACAGGCGACTGGGCATTTCTTGACGCTGAGGCACGAAAGCGTGGGGAGCAA  
ACAGGATTAGATACCCCTGTAGTCC

>Otu4552

CAGCCTACGGGGGGCTCCAGCTAGGAATTTTCCGCAATGGGCGAAAGCCTGACGGAGCGA  
CGCCGCGTAAGGGATGAAGGCTCTACGGAGTTGTAAACCTTTTTTCTGCGAGACGAGAGA  
GGACGGTATCGCAGGAATAAGCCCCGGCAAACCTACGTGCCAGCAGCCGCGGTAATACGTA  
GGGGGCGAGTGTTGTTTCGGAATTACTGGGCATAAAGGGTGCCTAGGCGGGAAGCCAAGCA  
AGGCGTGAAAGACCCTGGCTTAACTAGGGAACTGCGCTTTGAACTGGTTTTCTGGAGTGC  
AGGATGGGTGAGCAGAATTCCTGGTGTAGGGGTGAAATCTATAGATATCGGGAGGAATAC  
CGGTCGCGAAGGCGGCTCACTGGCCTGTAACTGACGCTGAAGCACGAAAGCGTGGGGATC

AAACCGGATTAGAGACCCCTGTAGTCC

>Otu4560

CCAGCCTACGGGATGCTGCAGCAACGAATCTTCCCCAATGGGCGAAAGCCTGAAGGAGCG  
ACGCCGCGTGGGGGATGAATGGCTTCGGCCCGTAAACCCCTGTCATTTGGGAACAATGCG  
TTTGGGTGAACATCCCAAACGTTGATAGTACCGGAAGAGGAAGGGACGGCTAACTCTGTG  
CCAGCAGCCGCGGTAATACAGAGGTCCCAAGCGTTGTTTCGGATTTACTGGGCGTAAAGGG  
TGCGTAGGTGGTTCGGGTAAGTCTGATGTGAAATCTCGGAGCTTAACCTCCGAAACTGCATT  
GGATACTATTTCGGCTTGAGGGTTGGAGGGGAGACTGGAATTCTCGGTGTAGCAGTGAAAT  
GCGTAGATATCGAGAGGAACACCAGTGGCGAAGGCGAGTCTCTGGACAACCTCTGACACT  
GAGGCACGAAAGCCAGGGGAGCAAACGGGATTAGAAACCCTAGTAGTCC

>Otu4564

CCAGCCTACGGGTGGCTGCAGTGGGGAATCTTGCGCAATGGGCGAAAGCCTGACGCAGCG  
ACGCCGCGTGGGTGATGAAGGCCTTCGGGTGTAAAGCCCTGTGGGGAGAGACGAATAAG  
TCGAGGCGAATACCCTCGATGATGACGGTATCTCCTTAGCAAGCACCGGCTAACTCTGTG  
CCAGCAGCCGCGGTAAGACAGAGGGTGCAAACGTTGTTTCGGAATTACTGGGCGTAAAGCG  
CATGTAGGCGGCTCTGCAGGTTCGGATGTGAAATCCCTCGGCTCAACCAAGGAAGTGCATT  
CGAAACCGCAGAGCTAGAGTCCCGGAGAGGAAGGTGGAATTCTCGGTGTAGAGGTGAAAT  
TCGTAGATATCGAGAGGAACACCGGTGGCGAAAGCGGCCCTTCTGGACGAGGACTGACGCT  
GAGATGCGAAAGCGTAGGGAGCAAACAGGATTAGAAACCCTTGTAGTCC

>Otu4565

CCAGCCTATGGGAGGCTCCAGTAAGGAATATTGGTCAATGGACGCAAGTCTGAACCAGCC  
ATGCCGCGTGAAGGATGAAGGCCCTAGTGGTTGTAAACTTCTTTTATACGGGAAAAATTC  
TTGGGTTCGTGAATCCGAGTTGATGGTACTGTATGAATAAGCACCGGCTAACTCCGTGCTA  
GCAGCCGCGGTAATACGGAGGGTGCAAGCGTTATCCGGATTTATTGGGTTTAAAGGGTGC  
GCAGGCGGAACTATAAGTCAGCGGTGAAAGCCTACAGCTTAAGTGTAGAAATTGCCATTGA  
TACTGTAGTTCTTGAGTGTAGGTGAAGAAGGCGGAATGTGTTGTGTAGCGGTGAAATGCT  
TAGATATAACACAGAACACCGATTGCGAAGGCAGCTTTCTAAACTACAACCTGACGCTCAT  
GCACGAAAGCGTGGGAGCAAACAGGATTAGAAACCCTCGTAGTCC

>Otu4566

CCAGCCTATGGGTTCGAGCAGTCGAGAATTTTTTCACAATGGGCGAAAGCCTGACGCAGCA  
ACGCCGCGTGGAGGATGAAGGCCTTCGGGTTCGTAAACTCCTTTTGGTTCGAGACGAGGAAG  
GACGGTATCGACCGAATAAGTCACGGCTAACTACGTGCCAGCAGCCGCGGTAAACGCTAG  
GTGGTGAGCGTTATCCGGATTTACTGGGTGTAAAGCGTGTGCAGGCGGTGCAGTAAGTGG  
TGTATGAAATCTCCGCGCTTAACGTGGAGGGGTTATGCCAGACTGCTGGACTAGAGGACG  
TGAGAGGGGCATGGAATTCCGGGTGTAGTGGTGAATGCGTAGAGATCCGGAGGAACCCC  
AGAGGCGAAGGCGGTGCCCTAGCACGTCCCTGACGCTCAGACACGACAGCATGGGGAGCG  
AACGGGATTAGATACCCCCGTAGTCC

>Otu4567

CCAGCCTATGGGGTGCTGCAGTCGAGGATCTTCGGCAATGGGCGCAAGCCTGACCGAGCG  
ACGCCGCGTGTGCGATGAAGGCCTTCGGGTGTAAAGCACTGTGAGGGGGAGGAAGCCG  
CAAGGTTGACCTATCCCTGGAGGAAGCACGGGCTAAGTTCGTGCCAGCAGCCGCGGTAAG  
ACGAACCGTGCGAACGTTGTTTCGGAATCACTGGGCTTAAAGGGCGCGTAGGCGGACGCTC  
AAGTCCGGGGTGAAATCTTTTCGGCTCAACCGGAAAATAGCCCTGGATACTGAGAGTCTCG  
AGGCAGGTAGGGGCAGCTGGAACCTCCGGTGGAGCGGTGAAATGCGTTGATATCGGAAGG  
AACGCCGCTGGCGAAGGCGAGTCTCTGGACATTTCTGACGCTGAGGCACGAAAGCCAGG  
GGAGCAAACGGGATTAGAAACCCGCGTAGTCC

>Otu4568

CCAGCCTACGGGTTGCTGCAGTCGAGAATATTTCGACAATGGGCGAAAGCCTGATCGAGCG  
ACACCGCGTGCAGGATGAAGGCCTTCGGGTGTAAACTGCGGTAGTATAGTAACAATGTA  
AATGAGTGTCTATACGGAAAGAGGTGGGTAACCTACGTGCCAGCACCAGCGGTAATACGTAG  
ACCTCAAGCGTTATCCGGATTTATTGGGCGTAAAGCGCATGTAGGGGGTTCGGTTCGTCT  
TCTCTTAAAGCCCACGGCCTAACCGTGGAAGTGGAGGAGATACGACCGGACTAGAGGGGG  
TTAGAGGTGCATGGAGCTCACGGTGTAGGGGTGAAATCCGTTGATATCGTGGGAAACACC  
AAAGGCGAAGGCAGTGCAGTGGGACCTTCTGACCCTGAGATGCGAAAGCGTGGGGAGCA  
AAAAGGATTAGAAACCCCCGTAGTCC

>Otu4575

CCAGCCTATGGGACGCAGCAGCAAGGAATTTTCGGCAATGGGGGGAACCCTGACCGAGCA  
ACGCCGCGTGGAGGACGAAGTATTTTCGGTATGTAAACTCCTTTTTTGATGGGAAGACAGGA

AAGAGGACGGTACCATCAGAAATAAGCTCCGGCTAACTACGTGCCAGCAGCCGCGGTAATA  
CGTAGGGAGCGGGCGTTGTCCGGAATTACTGGGCGTAAAGGGCGAGTAGGCGGTATAGCA  
AGTTCGATGTGAAAGCCTTCGGCTTAACCGGAGAGGGTCATCGGAGACTGCTAAACTAGA  
GTGCAAAAGAGGCTAACAGAATTCCCGGTGTTGTGGTGAAATGCGTAGATATCGGGAGGA  
ATACCAGTGGCGAAGGCGGTTAGCTGGGTGTAACTGACGCTGAGGCGCGAAGGCTAGGG  
TAGCAAACAGGATTAGAAACCCCCGTAGTCC

>Otu4579

CCAGCCTATGGGTCGCTCCAGTCGAGAATTTTTCAATGGGCGCAAGCCTGATGGAGCG  
ACGCCGCGTGGGGGATGAATGGCTTCGGCCCGTAAACCCCTGTCATTTGCGATCAAACCT  
CGTTATTTTAAAAGATGACGAAGTATAGTAGCGAAAGAGGAAGGGACGGCTAACTCTGTG  
CCAGCAGCCGCGGTAATACAGAGGTCCCAAGCGTTGTTTCGGATTCACTGGGCGTAAAGGG  
TGCGTAGGTGGCGAGGTAAGTCGGATGTGAAAGCTCGGGGCTTAACCCCGAAATGGCATT  
GGAAACTACCTTGCTTGAGGGTTGGAGGGGGGACTGGAATTCTCGGTGTAGCAGTGAAAT  
GCGTAGATATCGAGAGGAACACCAGTGGCGAAGGCGAGTCCCTGGACAACACCTGACACT  
GAGGCACGAAAGCGTGGGGAGCAAACAGGATTAGATACCCGTGTAGTCC

>Otu4586

CCAGCCTATGGGGTGCTCCAGTTGGGAATATTGGACAATGGGCGCAAGCCTGATCCAGCC  
ATGCCGCGTGAGTGAAGAAGGCCTTAGGGTTGTAAAGCTCTTTCGCCGACGAAGATAATG  
ACGGTAGTCGGAGAAGAAGCCCCGGCTAACTTCGTGCCAGCAGCCGCGGTGATACGAAGG  
GGGCTAGCGTTGTTTCGGAATTACTGGGCGTAAAGCGCACGTAGGCGGATTGTTAAGTTAG  
AGGTGAAAGCCCAGGGCTCAACCCTGGAATTGCCTTTGATACTGGCAGTCTAGAGATCGG  
AAGAGGTGAGTGGAATTCCTAGTGTAGAGGTGAAATTCGTAGATATTAGGAAGAACACCA  
GTGGCGAAGGCGGCTCACTGGTCCGATTCTGACGCTGAGGTGCGAAAGCGTGGGGAGCAA  
ACAGGATTAGATACCCTAGTAGTCC

>Otu4587

CCAGCCTACGGGATGCACCAGTGGGGAATATTGGACAATGGGCGCAAGCCTGATCCAGCG  
ACGCCGCGTGAGTGATGAAGGCCTTCGGGTGTAAAGCTCTGTTGAGGGAGAAGAAAACA  
GTTGGCGCGAATAGCTCCAGCTCTTGACGGTATCCCTTTAGAAAGCACCGGCTAACTCTG  
TGCCAGCAGCCGCGGTAAGACAGAGGGTGCAAACGTTGCTCGGAATTACTGGGCGTAAAG  
CGCGTGTAGGCGGACCCACAAGTCGGACGTGAAAGCCCTGGGCTCAACCCAGGAAGTGA  
TCCGAAACTGTGGGTCTGGAGTGGTGGAGAGGGAAGCAGAATTCCTGGTGTAGAGGTGAA  
ATTCGTAGATATCAGGAGGAACACCGGTGGCGAAGGCGGCTTCCTGGACACTTACTGACG  
CTGAGACGCGAAAGCGTGGGGAGCAAACAGGATTAGAGACCCTCGTAGTCC

>Otu4589

CCAGCCTATGGGTGGCAGCAGTTAGGAATCTTGGGCAATGGGCGCAAGCCTGACCCAGCC  
ATGCCGCGTGTTGAAGAAGGCCTTCGGGTGTAAAGCACTTTCAGCGGTGAAGAAAAAC  
TTAGGGCTAATACCCTTGAGTCTTGACGTAAACCACAGAAGAAGCACCGGCTAACTCCGT  
GCCAGCAGCCGCGGTAATACGGAGGGTGCGAACGTTAATCGGAATCACTGGGCGTAAAGC  
GCGCGTAGGCGGTTTGTAAAGTGGGATGTGAAATCCCCGGACTTAACCTGGGAATTGCAT  
TTCAAACCTGGCCGACTAGAGTACGGTAGAGGGAGGTAGAATTTCTGTGTAGCGGTGAAA  
TGCGTAGATATAGGAAGGAATACCAGTGGCGAAGGCGGCCTCCTGGATCGATACTGACGC  
TGAGGCGCGAAAGCGTGGGGAGCAAACAGGATTAGAAACCCCTGTAGTCC

>Otu4591

CCAGCCTACGGGATGCAGCAGTAAGGAATATTGGTCAATGGAGGCAACTCTGAACCAGCC  
ATGCCGCGTGACAGGATGACGGCCCTATGGGTGTAAACTGCTTTTGTACGGGAGAAAACC  
CTTTCACGTGTGAGAGGTTGATAGTACCGTAAGAATAAGCATCGGCTAACTTCGTGCCAG  
CAGCCGCGGTAAGACGAAGGATGCAAGCGTTATCCGGATTATTGGGTTTAAAGGGAGCG  
TAGGCGGTCTTATAAGTCAGTGGTGAAATCTCGTTGCTTAACAACGAACGTGCCATTGAT  
ACTGTAGGGCTTGAGTACAGTTGCCGTTGGCGGAATGTGTCATGTAGCGGTGAAATGCAT  
AGATATGACACAGAACACCGATTGCGAAGGCAGCTGACGAAACTGTAACCTGACGCTGAGG  
CTCGAAAGCGTGGGGATCAAACAGGATTAGATACCCGAGTAGTCC

>Otu4592

CCAGCCTATGGGTCGCAGCAGTCGAGAATCTTCCGCAATGGACGAAAGTCTGACGGAGCG  
ACGCCGCGTGAGAGGATGAAGTGCTTCGGCATGTAAACTCCTTCTGCCAGGGAAAAAGTTT  
ATTGATTGTACCTGGAGAATAAGAGGTTGCTAAACTCGTGCCAGCAGCAGCGGTAATACG  
AGTGCCCTCGAGCGTTATCCGGAATCATTGGGCGTAAAGGGTGCGTAGGCGGCGATGTTAG  
TCTCCCGTAAAACTTTTCGGCTCAACCGAGAGTCTGCGGGGGAAACGGCATTGCTTGAGG  
ACGGGAGAGGTCTCTGGAACCTCTAGGTGTAGCGGTGAAATGCGTTGATATCTAGGGGAAC



ACCAAAAGCGAAGGCAAGAGACTGGCCCCGCTCCTGACGCTGAAGCACGAAAGCGTGGGTC  
GCGAATGGGATTAGATACCCGTGTAGTCC

>Otu4593

CCAGCCTACGGGGGGGCTGCAGTCGAGAATCTTCCGCAATGGGCGAAAGCCTGACGGAGCG  
ACGTTACGTGAATGATGAAGCCCTTAGGGGTGTAAAGTTCTTTTCTCTGGGAGGAAGCCG  
CAAGGCAGACAGTACCAGAGGAATAAGAGGGTCCTAACTCTGTGCCAGCAGGAGCGGTAA  
TACAGAGCCCTCGAGCGTTACCCGGATTTATTGGGCGTAAAGGGTCCGTAGGTGGTAAAG  
TAAGTTGAAGGTTAAATCTCATCGGCTCAACCTTTGAGGTGCTTTCAATACTGCTATACT  
AGAGGGCGTTAGGGGTAGCGGAACCGACGGAGTAGGGGTGAAATCCGTTGATATCGTCG  
GGAACACCAAAAGCGAAGGCAGCTAACTAGGACGACCCTGACACTGAGGGACGAAAGCGT  
GGGGAGCAAAAAGGATTAGAAACCCTCGTAGTCC

>Otu4599

CCAGCCTACGGGTGGCAGCAGTGGGGAATCTTGACAATGGGGGAAACCCTGATGCAGCG  
ACGCCGCGTGAGCGATGAAGCCCTTCGGGGTGTAAAGCTCTTTCGGCAGGGACGATAATG  
ACGGTACCTGCAGAAGAAGCTGCGGCTAACTACGTGCCAGCAGCCGCGGTAAATACGTAGG  
CAGCAAGCGTTGTTTCGGAATTACTGGGCGTAAAGAGTGTGTAGGCGGTGCTCTAAGTTTG  
GTGTGAAATCTCCCGGCTTAACTGGGAGGGTGCGCCGAAGACTGGAGTGCTCGAACGTGG  
GAGAGGAAAGCGGAATTCCTGGTGTAGCGGTGAAATGCGTAGATATCAGGGGGAACACCA  
ATGGCGAAGGCAGCTCGCTGGGACGTGACTGACGCTGAGACGCGAAAGCGTGGGGAGCAA  
ACAGGATTAGAAACCCTAGTAGTCC

>Otu4601

CCTACGGGTTGCAGCAGTCGAGAATATTCGACAATGGGCGAAAGCCTGATCGAGCGACGC  
CGCGTGCCAGGATGAAGGCCCTTCGGGTTCGTAAACTGCGGTAGTAAGATAATAATGTAAATG  
AATGTCTTACGGAAAGAGGTGGGTAACCTACGTGCCAGCACCAGCGGTAAATACGTAGACCT  
CAAGCGTTATCCGGATTTATTGGGCGTAAAGGGCGCGTAGGTGGTTTCGTGCGTCTTCTG  
TTAAAGCCACCGCTCAACGGTGGAAGTGCAGGAGATACGACGGGACTAGAGGAGGTTAG  
AGGTGCATAGAACACACGGTGTAGGGGTGAAATCCGTTGATATCGTGCGGAATACCAAAG  
GCGAAGGCATTGCACTGGGACCTTCCTGACATTGATGCGCGAAAGCGTGGGGAGCAAAAA  
GGATTAGATACCCCTGTAGTCC

>Otu4603

CCAGCCTATGGGGGGCAGCAGGCGCGAAACCTTTACAATGCACGAAAGTGTGATAGGGGA  
ACTCAGCGTGCTCATGGAACCATGGGCTTTTCTACAGGGTAAATACCTGTGGGAATAAA  
GGATGGGCAAGACCGGTGCCAGCAGCCGCGGTAACACCGGCGTCCTAAGTGGGAATCACT  
TATTAGGTCTAAAGCGCTCGTAGTTGGCTTTGTAAATTTCTTGTGAAATCGTGTGCTTA  
ACGGCACGGCGTGCCAGGAAACACTGCAAGGCTTGGGACTGGGAGGCGTCAGAAGTATTTCT  
TTAGGGAGCGGTAAAATGTGATAATCTAAGAAGGACTACCTGTGGCGAAGGCGTCTGACG  
AGAACAGGTTTCGACAATCAGGAGCGAAGGCTAGGGGAGCAAACCGGATTAGATACCCAG  
TAGTCC

>Otu4605

CCAGCCTACGGGTTCGAGCAGTGGGGAATATTGGACAATGGGCGCAAGCCTGACCCAGCC  
ATGCCGCGTGAGCAGCAAGGCCCTCCGGGTTCGTAAAGTCCTTTTATCTGGGGCTAAAAAG  
CCGTTTTTTGAGCGGAATTGAAGGTACCAGAGGAATAAGCACCGGCAAACTACGTGCCAGC  
AGCCGCGGTAATACGTAGGGTGCAAGCGTTGTCCGGATTTACTGGGTTTAAAGGGTGCCT  
AGGCGGGAGGATAAGTCCGTGATGAAATGGGAGGGCTCAACCTTACCCGCTGTTACCGAT  
ACTGCCCTTCTTGAGTTAAGCAGAGGTAGCTGGAATGAGCAGTGTAGCGGTGAAATGCGT  
AGATATTACTCAGAACCAATTGAGAAGTCAGGCTACTGGGCTTCAACTGACGCTGAGG  
CACGAAAGCGTGGGGATCAAACAGGATTAGAAACCCTCGTAGTCC

>Otu4613

CCAGCCTATGGGATGCTGCAGTAACGAATATTCCGCAATGGGCGCAAGCCTGACGGAGCA  
ATGCCGCGTGAGGATGAAGCGGTTTCGCCGTGTAACTGCTGTCAGACCCCAGAAACCA  
TGATCGGGGTGAGAGGAAGGGCCGGCTAACCCTGTGCCAGCAGCCGCGGTAATACAGGGG  
GCCCAGCGTTAATCGGAATCACTGGGCTTAAAGGGTGCCTAGGCGGACTCGAAGGTGCA  
TTGTGAAATCCCTTGGCTCAACCAAGGAATTGCAGTGCATACCACGAGTCTCGAGGCAGG  
TAGGGGTAGCTGGAACGCTCGGTGGAGCGGTGAAATGCGTAGATATCGAGCGGAACGCCG  
AAGGTGAAGACAAGCTACTGGGCCTGACCTGACGCTGAGGCACGAAAGCGTGGGGATCAA  
ACAGGATTAGAAACCCCCGTAGTCC

>Otu4618

CCAGCCTATGGGAGGCAGCAGTGGGGAATATTGGACAATGGGCGCAAGCCTGATCCAGCC

ATGCCGCGTGAGTGATGACGGCCCTAGGGTTGTAAAGCTCTTTCACCCACGACGATAATG  
ACGGTAGTCGGAGAAGAAGCCCCGGCTAACTTCGTGCCAGCAGCCGCGGTGATACGAAGG  
GGGCTAGCGTTGTTTCGGAATTACTGGGCGTAAAGCGCACGTAGGCGGATCGTTAAGTCGG  
GGGTGAAAGCCCAGGGCTCAACCCTGGAATGGCCTTCGATACTGGCGATCTGGAGAATGG  
GAGAGGTGAGTGGAATTCCTAGTGTAGAGGTGAAATTCGTAGATATTAGGAAGAACACCA  
GTGGCGAAGGCGGCTCACTGGCCCATTCTGACGCTGAGGTGCGAAAGCGTGGGGAGCAA  
ACAGGATTAGATACCCTTGTAGTCC

>Otu4621

CCAGCCTATGGGTCGCACCAGTGGGGAATATTGGACAATGGGGGAAACCCTGATCTAGCA  
ATGCCGCGTGCGTGATGAAGGCCTTCGGGTGTAAAGCGCTTTTATAGGTGACGATAATG  
ACGGTAACCTATGAATAAGCCCCGGCTAACTTTGTGCCAGCAGCCGCGGTAATACGAAGG  
GGGCTAGCGTTGTTTCGGAATGACTGGGCGTAAAGGGCGCGTAGGCGGTAAGATACGTTTG  
GTGTGAAAGTCCTGGGCTTAACCTGGGGACTGCACTGAATACGGTTTTACTGGAGTGCGA  
GAGGGGATAAGGGAATTGTGCGTGTAGAGGTGAAATTCGTAGATATGCACAAGAACACCG  
GTGGCGAAGGCGCTTATCTGGCTCGCAACTGACGCTAAGGCGCGAAAGCGTGGGGAGCAA  
ACAGGATTAGAGACCCCTGTAGTCC

>Otu4623

CCAGCCTATGGGTTGCTGCGAGGCGCGCAAACCTCTCCAATGTGCGAAAGCGTGAGAGGGGA  
ATTCTAGTGCTTACGGTTTATCCGTAGGCTTTTGCCATGTGTAAATAGCATGGCGAATA  
AGTGGTGGGTAAGACTGGTGCCAGCCGCCGCGGTAACACCAGCGCCACAAGTGGCCATCG  
CGATTATTGGGCCTAAAGCGTTCGTAGTCGGTTAAGTGCATCCTCTGTGAAATCGCAGCG  
CCTAACGTTGCGGCATGCGGAGGACACGACTTAACCTTGAGACCGGGAGGCGTCGAGGGTA  
TTCCAAGGGGACCGGTAAAATGGTATAATCCTTGAGGACCACCTGTGGCGAAGGCGCTC  
GACGAGAACGGATCTGACGATGAGGAACGAAAGCCAGGGGAGCAAACCGGATTAGAGACC  
CTCGTAGTCC

>Otu4626

CCAGCCTACGGGAGGCTGCAGTCGAGAATTTTTCTCAATGGGCGAAAGCCTGAAGGAGCG  
ACGCCGCGTGGGGGATGAATGGCTTCGGCCCGTAAACCCCTGTCATTTGGGAACAATGTC  
CCGACAATAACATTGTTCGGGATTGATAGTACCGGAAGAGGAAGGGACGGCTAACTCTGTG  
CCAGCAGCCGCGGTAATACAGAGGTCCCAAGCGTTGTTTCGGATTTACTGGGCGTAAAGGG  
TGCGTAGGTGGTTCGGGTAAGTCTGATGTGAAATCTCGGAGCTTAACCTCCGAAACTGCATT  
GGATACTATTTCGGCTTGAGGAATGGAGGGGAGACTGGAATACTTGGTGTAGCAGTGAAAT  
GCGTAGATATCAAGTGGAACACCAGTGGCGAAGGCGAGTCTCTGGACATTTTCCTGACGC  
TGAGGCACGAAAGCCAGGGGAGCAAACCGGGATTAGAAACCCCGGTAGTCC

>Otu4630

CCAGCCTATGGGTGGCAGCAGTGGGGAATATTGGACAATGGGCGAAAGCCTGATCCAGCA  
ATGCCGCGTGGATGAAGAAGGTCTTCGGATTGTAAAGTCCTTTCGACGGGGACGATGATG  
ACGGTACCCGTAGAAGAAGCCCCGGCTAACTTCGTGCCAGCAGCCGCGGTAATACGAAGG  
GGGCTAGCGTTGCTCGGAATGACTGGGCGTAAAGGGCGCGTAGGCGGTTTGTTAGTTAG  
ACGTGAAATTCCTGGGCTCAACCTGGGGGCTGCGTTTAATACAGCCAGACTTGAGTGTGA  
AAGAGGGTCGTGGAATTCACAGTGTAGAGGTGAAATTCGTAGATATTGGGAAGAATACCC  
GTGGCGAAGGCGGCCAACTGGACCAACATTGACGCTGAGGCGCGAAAGCGTGGGTAGCAA  
ACAGGATTAGATACCCCGGTAGTCC

>Otu4631

CCAGCCTATGGGTTGCTCCAGTAGGGAATATTGCAAAATGGGCGGAAGCCCGATGCAGCA  
ACGCCGCGTGTGCGATGAAGGCCTTCGGGTGCTAAAGCACTTTTCAGAGGGATGAGGAAG  
GACAGTACCTCTGGAATAAGTCTCGGCTAACTACGTGCCAGCAGCCGCGGTAACACGTAG  
GAGGCGAGCGTTATCCGATTACTGGGCGTAAAGCGCGTGACAGGCGGTTTGGAAGTTG  
GATGTGAAAGCTCCTGGCTCAACTAGGAGAGGTTCGTTCAAGACTTTCAGACTAGAGGATG  
GTAGAGGGAGGTGGAATTCCGGGTGTAGTGGTGAATGCGTAGATATCCGGAGGAACACC  
AGTGGCGAAAGCGGCCTTCTAGACCATAACTGACGCTCATACGCGAAAGCTAGGGTAGCA  
AACGGGATTAGAAACCCCGGTAGTCC

>Otu4633

CCAGCCTATGGGAGGCACCAGTGGGGAATCTTTCACAATGGGGGCAACCCTGATGGAGCG  
ACGCCGCGTGGAGGATAAGGTCTTCGGATTGTAAACTCCTGTCATGCGAGAGCAAGGCCT  
GATGGTTAACACCCGTCATGCTTGATAGTATCGCAAGAGGAAGAGACGGCTAACTCTGTG  
CCAGCAGCCGCGGTAATACAGAGGTCTCAAGCGTTGTTTCGGAATCACTGGGCGTAAAGGG  
TGTGCAGGCGGTGTGCTAAGTCAGATGTGAAAGCCCGGGCTCAACCCCGGAACCTGCATC

CGATACTGGCATGCTAGAGAAATTGGAGAGGAGTCTAGAAATTCACGGTGTAGCAGTGAAT  
GCGTGGATATCGTGAGGAATACCAAGTGCGAAGGCAGGACTCTGGACATTATCTGACGCT  
GAGACACGAAGGCCAGGGGAGCAAACGGGATTAGATACCCGGGTAGTCC

>Otu4637

CCAGCCTATGGGTTGCAGCAGTGGGGAATCTTGGACAATGGGCGCAAGCCTGATCCAGCC  
ATGCCGCGTGAGTGAAGGAGGTCTTCGGATTGTAAAGCTCTTTTGCCAGGGACGATAATG  
ACGGTACCTGGAGAATAAGCCCCGGCAAACCTTCGTGCCAGCAGCCGCGGTAATACGAAGG  
GGGCTAGCGTTGTTTCGGAATTACTGGGCGTAAAGCGCACGTAGGCGGGTCGTTAAGTCAG  
GGGTGAAATCCCGGAGCTCAACTCCGGAACGCCTTTGATACTGGCGATCTTGAGATCGG  
AAGAGGTGAGTGGAATTTCCAGTGTAGAGGTGAAATTCGTAGATATTGGGAAGAACACCA  
GTGGCGAAGGCGGCTCACTGGTCCGATACTGACGCTGAGGTGCGAAAGCGTGGGGAGCAA  
ACAGGATTAGAAACCCCCGTAGTCC

>Otu4641

CCAGCCTACGGGTCGCAGCAGTGGGGAATCTTGCGCAATGGACGAAAGTCTGACGCAGCA  
ACGCCGCGTGGGTGATGAAGGTCTTCGGATCGTAAAGCCCTGTGCGAGGGGAAGATGCTT  
TCGCCGTCTAATAGATGGCGGAGGTGACGGTACCCTTAAAGGAAGCACCGGCTAACTCTG  
TGCCAGCAGCCGCGGTAATACAGAGGGTGCAAGCGTTGTTTCGGAATTATTGGGCGTAAAG  
GGGTGTAGGCGGCATGCATAGTCTTCTGTGAAATCTACGGGCTTACCCCGTAACGTGCA  
GAGGATACTGGCAAGCTAGAGTGTTCGGAGAGGATAGTGGAATTCAGGTGTAGAGGTGAA  
ATTCGTAGAGATCTGGAGGAACACCAGTGGCGAAGGCGACTATCTGGCTGACAACTGACG  
CTGAGACTCGAAAGCATGGGGAGCAAACAGGATTAGATACCCGAGTAGTCC

>Otu4643

CCAGCCTACGGGTCGCAGCAGTAGGGAATATTGCGCAATGGGGGAAACCCTGACGCAGCG  
ACGCCGCGTGAGTGATGAAGGCCTTAGGGTCGTAAAGCTCTGTTGCACGGGAAGAAAAAA  
ATGACGGTACCGTGCGAGAAAGGATCGGCTAACTTCGTGCCAGCAGCCGCGGTAAGACGA  
GGGATCCTAGCGTTGTTTCGGAATCATTGGGCGTAAAGCGTATGTAGGCGGCCTTATAAGT  
CAGGTGTGAAAGCCCCGGGCTCAACCCGGGAAGTGCATCTGATACTGTTTGGCTTGAGTA  
CTGGAGAGGATAGTGGAATTCCTGGTGTAGTGGTGAAATACGTAGATATCAGGAGGAACA  
CCGGTGGCGAAGGCGGCTATCTGGCCAAGTACTGACGCTGAGATACGAAAGCGTGGGGAG  
CAAACAGGATTAGATACCCGTGTAGTCC

>Otu4650

CCAGCCTATGGGGGGCTGCAGTGGGGAATCTTCCGCAATGGACGAAAGTCTGACGGAGCA  
ACGCCGCGTGAGTGAAGAAGGCCTTCGGGTGTAAAGCTCTGTTATTGGGGACGAACGTT  
CTTTATGTAAACAATGTGGAGAAGTGACGGTACCCAAGGAGGAAGCCACGGCTAACTACG  
TGCCAGCAGCCGCGGTAATACGTAGGTGGCAAGCGTTGTCCGGAATTATTGGGCGTAAAG  
CGCGCGTAGGTGGGATAGTAAGTCTGCTTTAAAGTGCGGGGCTCAACCCCGTGATGGGG  
TGGAACCTGCTATTCTTGAGTGCAGGAGAGGAAAGCGGAATTCACAGTGTAGCGGTGAAA  
TGCGTAGATATTGGGAGGAACACCAGTGGCGAAGGCGGCTTTCTGGACTGTGTCTGACAC  
TGAGGCGCGAAAGCTAGGGGAGCGAACGGGATTAGAGACCCTAGTAGTCC

>Otu4660

CCAGCCTATGGGGGGCTGCAGTCGAGGATTTTTCTCAATGGGGGAAACCCTGAAGGAGCG  
ACGCCGCGTGAGGGATGAAGGTCTTCGGATTGTAAACCTCTGTCATCTGGGATCAAAGTG  
CTCTACCTAACACGTGGAGTATTGCTAGTACCAGAAGAGGAAGCAGTGGCTAACTCTGTG  
CCAACAGCCGCGGTAATACAGAGACTGCAAGCGTTGTTTCGATTTCATTGGGCGTAAAGG  
TGCGCAGGCGGTGTGCTAAGTCGGATGTGAAATCTCACAGCCTAACTGTGATAGGTCATT  
CGAAACTGGCATGCTAGAGGATTGGAGAGGAGACTGGAATAGTTGGTGTAGCAGTGAAT  
GCGTAGAGATCAACTAGAACACCGGTGGCGAAGGCGAGTCTCTGGACAATTCCTGACGCT  
CAGGCACGAAAGCCAGGGGAGCAAACGGGATTAGAAACCCGCGTAGTCC

>Otu4663

CCAGCCTACGGGGCGCTCCAGTAACGAATCTTCCGCAATGCACGAAAGTGTGACGGAGCG  
ACGCCGCGTGTGGGAGAAGCCCTTCGGGGTGTAAACCGCTGTGAGGGGTAGAAAGTTCT  
GATCAACCCCAGAGGAAGGCACGGCTAACTCTGTGCCAGCAGCCGCGGTAAGACAGAGGT  
GCCAAGCGTTAGGCGGAATCACTGGGCTTAAAGCGTGTGTAGGCGGGTGCCTAAGTACCT  
TGTGAAATCCCATGGCTCAACCATGGAACCTGCTTGGTATACTGAGCATCTTGAGCCACCT  
AGGGGCTACTGGAACAAATGGTGGAGCGGTGAAATGCGTAGATATCATTTGGAACGCCAA  
TGGTGAAAACAGGTAGCTGGGGGTGTGCTGACGCTGAGACACGAAAGCCAGGGGAGCAAA  
CGGGATTAGAAACCCAGTAGTCC

>Otu4664

CCAGCCTACGGGGGGCAGCAGTGGGGAATCTTGCACAATGGGGGAAACCCTGATGCAGCG  
ACGCCGCGTGAGCGATGAAGCCCTTCGGGGTGTAAGCTCTTTTCGACGGGAACGATAATG  
ACGGTACCCGGAGAAGAAGCTGCGGCTAACTACGTGCCAGCAGCCGCGGTAATACGTAGG  
CAGCAAGCGTTGTTTCGGAATTACTGGGCGTAAAGAGTATGTAGGCGGTTCCGCCAAGTTTG  
GTGTGAAATCTCCCGGCTTAACTGGGAGGGTGCGCCGAAAACCTGGCGGGCTTGAGGGTGG  
GAGAGGTAAGCGGAATTTCTGGTGTAGCGGTGAAATGCGTAGATATCAGAAGGAACACCT  
GTGGTGTAGACAGCTTACTGGACCATTTCTGACGCTGAGATACGAAAGCGTGGGTAGCAA  
ACAGGATTAGATACCCGTGTAGTCC

>Otu4665

CCAGCCTACGGGGCGCAGCAGTGGGGAATTTTACGCAATGGGCGAAAGCCTGACGTAGCG  
ACACCGCGTGAGTGAAGAAGGACTTTGGTTCGTAAACTCTGTCAACAGGGACGAAAAAA  
ATGACGGTACCTGTGGAGGAAGCATCGGCTAACTACGTGCCAGCAGCCGCGGTAAGACGT  
AGGATGCGAGCGTTGTCCGGATTTATTGGGCGTAAAGAGTTCGTAGGTGGTTTGTAAAGT  
CTGATGTTAAAGACTGGGGCTCAACCTCGGAAATGCATTGGATACTGGCAGACTTGAGTG  
TGGTAGAGGCAAGCGGAATTTCCAGTGTAGCGGTGAAATGCGTAGATATTGGGAAGAACA  
CCGGTGGCGTAAGCGGCTTGCTGGGCCATAACTGACACTGAGGAACGAAAGCTAGGGTAG  
CGAATGGGATTAGAAACCCAGTAGTCC

>Otu4666

CCAGCCTATGGGGGGCAGCAGCAACGAATATTCCGCAATGGGCGAAAGCCTGACGGAGCG  
ACGCCGCGTGAGGGATGAAGTCCCTTCGGGATGTAAACTTCAATAGTACGTCAGGAACCA  
ATCCTGGCTAATACCTTGGAAGATGACCAGCGTACGAAAGAGGCGGCTAACTCCGTGCC  
AGCAGCCGCGGTAATACGGAGGCCTTGAGCGTTGTTTCGGAATCACTGGGCTTAAAGCGCG  
TGTAGGCGGGACGGTAAGTACCTTGTGAAATCCCCGGCTTCAATCCGGGAACCTGCTTGGT  
ATACTGCCGTTCTTGAGGCAGGTAGGGGTCCTGGAACCTTAGGTGGAGCGGTGAAATGC  
GTAGATATCTAAGGGAACGCCGTGTGGCGAAAGCGGGTGACTGGGCCTGACCTGACGCTGA  
GACGCGAAAGCGTAGGGAGCAAACGGGATTAGATACCTTGTAGTCC

>Otu4668

CCAGCCTATGGGGGGCAGCAGTCGAGGATCTTCGTCAATGGACGAAAGTCTGAACGAGCG  
ACGCCGCGTGTCGATGAAGGCCCTTCGGGTGTAAAGCACAAAAGTGGGGATAAAAGCCG  
AAAGGTCTGATTGATCCACAGTAAGCTCGGGCTAAGTTTCGTGCCAGCAGCCGCGGTAAGA  
CGAACCGAGCGAACGTTGTTTCGGAATCACTGGGCTTAAAGGGCGCGTAGGCGGGCGATCA  
AGTCGGTGGTGAAATCCTACAGCTTAACTGTAGAACTGCCTCCGATACTGGTTGTCTCGA  
GGAAGGTAGGGGCGTACGGAACAGTTGGTGGAGCGGTGAAATGCGTTGATATCAACTGGA  
ACTCCGGTGGCGAAGGCGGTACGCTGGACCTTTTCTGACGCTGAGGCGCGAAAGCCAGGG  
GAGCAAACGGGATTAGAAACCCGCGTAGTCC

>Otu4669

CCAGCCTATGGGTGGCAGCAGTCGAGAATATTCCACAATGGGCGAAAGCCTGATGGAGCG  
ACGCCGCGTGTCAGGATGAAGGCCCTTCGGGTGTAAACTGCGGTAGTAAAGTAATAATGCA  
AATGAATGCTTTATGGAAGAGGTTGGTAACTACGTGCCAGCACCCGCGGTAACACGTAG  
ACCTCAAGCGTTATCCGGATTTATTGGGCGTAAAGAGCATGTAGGGGGTTTTGCGCGTCT  
TCTGTTAAAGCTCGGGGCTTAACCCCGAAAGTGCAGGAGATACGGCAAGACTAGAGGATG  
TTAGAGGTACCAGGAACACACGGTGTAGGGGTGAAATCCGTTGATATCGTGTGGAACACC  
AAAGGCGAAGGCAGGGTACTGGGACACTCCTGACCCTGAGATGCGAAAGCGTGGGGAGCA  
AAAAGGATTAGAAACCCTAGTAGTCC

>Otu4670

CCAGCCTATGGGTGCGACACAGCGACGAATCTTTCGCAATGGGCGCAAGCCTGACGGAGCA  
ATGCCGCGTGTCAGGATGAAGCACCTCCGGTGTGTAAACCACTGTCAGGGGACGGAACCAA  
TGATTGTCCCCAAAGGAAGTGGCGACTAACTCTGTGCCAGCAGTCGCGGTAATACAGAGG  
CCACGAGCGTTAGTCGGAATCACTGGGCTTAAAGGGTGCGTAGGCGGCTCAGCACGTGCT  
TCGTGAAAGCCCCCTGGCTCAACCAGGGAATTGCGGAGCATACGGCTGGGCTTGAGGCGTG  
TAGGGGCTGTCAGAACAGTAGGTGGAGCGGTGAAATGCGTAGATATCTACTGGAATGCCG  
ATGGTGAAGACGGGCAGCTGGGCACGACCTGACGCTGAGGCACGAAAGCGTGGGGAGCAA  
ACAGGATTAGATACCCCGTGTCC

>Otu4672

CCAGCCTATGGGTGGCACCAGTGAGGAATATTGGACAATGGGCGAAAGCCTGATCCAGCA  
ATACCGCGTGAGTGAAGAAGGCCCTTAGGGTTGTAAAGCTCTTTCAGCAGGGAAAAATAATG  
ATGGTACCTGCAAAAGAAGTCCCGGCTAACTCCGTGCCAGCAGCCGCGGTAATACGGAGG  
GGACTAGCGTTGTTTCGGAATTTACTGGGCGTAAAGAGCGCGTAGGCGGGTTATTAAGTTAG

AAGTGAAAGCCCAGGGCTTAACCCTGGAAC TGCTTCTAAA ACTGGTAACCTAGAGTATGG  
GAGGGGACAGTGGAATTCCTAGTGTAGAGGTGAAATTCCTTAGATATTAGGAGGAACATCG  
GTGGCGAAAGCGACTGTCTGGAACATTACTGACGCTGAGGTGCGAAAGCGCGGGGAGCAA  
ACAGGATTAGAAACCC CAGTAGTCC

>Otu4675

CCAGCCTACGGGGCGCACCA GTCAAGAACCTTCCACAATGGACGAAAGTCTGATGGAGGG  
ACGCCGCGTGATTGATGAAGTCCCTCTGGGACGTAAAGATCTTTTGTAGACTACTAATTT  
TATTGAAGAGTCTAAGAATAAGGGGTTGCTAAACTCGTGCCAGCAGCAGCGGTAATACGA  
GTGCCCCAAGCGTTATCCGGAATTACTGGGCGTAAAGGGTGTGTAGGTGGTCGTGTTAGT  
CTCTCGTTAAATTCCTTCGGCTTAACCGGGGGCATGCGGGGGAACGGCACGACTTGAGGA  
TGCGAGGGGCCTGTGGAAC TCATGGAGTAGGGGTAAATATCCGTTGATATCATGGGGAACA  
CCGAAAGCGAAGGCAGCAGGCTGGCGCATTCCTGACACTGAAACACGAAAGCGTAGGTAG  
CGAATGGGATTAGAAACCC TTGTAGTCC

>Otu4678

CCAGCCTACGGGGTGCAACCA GTGAGGAATATTGCTCAATGGGCGAAAGCCTGAAGCAGCG  
ACGCCGCGTGAGGGATGAAATCCGTTAGGATGTAAACCTCTTTTTCAGGGGATGAATGTA  
CCCTTTT TAGGGTATTGACCGTACCCTGAGAATAAGCACCGGCCAACTACGTGCCAGCAGC  
CGCGGTAATACGTAGGGT GCGAGCGTTGTCCGGAATTACTGGGTGTAAAGGGTCCGCAGG  
CGGGCAAGTAAGTCGGTGGTGAAATCTCACGGCCTAACCGTGAAACTGCCCTCGATACTA  
CTTGTCTTGAGTTCGAGAGAGGATGATGGAATTCATGGTGTAGCGGTGAAATGCGTAGAG  
ATCATGAAGAACCAAGTGGCGAAGGCGGT CATCTGGCTCGAAACTGACGCTCAGGGACG  
AAAGCGTGGGTAGCAAACAGGATTAGAGACCC TAGTAGTCC

>Otu4684

CCAGCCTACGGGGGGCACCA GTTCGGGAATTTTGCTCAATGGGCGCAAGCCTGAAGCAGCA  
ACGCTGCGTGAGGGATGAAGGCCTTCGGGTGTAAACCTCTTTTACCAGGGAAGACAATG  
ACGGTACCTGGAGAATAAGTCACGGCTAACTACGTGCCAGCAGCCGCGGTAATACGTAGG  
TGACGAGCGTTGTCCG GATTTACTGGGCGTAAAGAGCGCGCAGGCGGTCTGTATAAGTCGA  
GTGTGAAAGCCCCCGGCTCAACTGGGGAGGGTTCGCTCGATACTATTTCGACTCGAAGGTGG  
GAGAGGGAAGCGGAATTC CCGGTGTAGTGGTGAAATGCGTAGATATCGGGAGGAACACCA  
GTGGCGAAGGCGGCCTCCTGGCCCATTCCTTGACGCTGAGGCGCGAAAGCTAGGGGAGCAA  
ACGGGATTAGAAACCC GAGTAGTCC

>Otu4685

CCAGCCTATGGGGTGCTCCAGTGGGGAATATTGGACAATGGGCGAAAGCCTGATCCAGCA  
ATGCCGCGTGTTGTGAAGAAGGTCTTCGGATTGTAAAGCACTTTCGCACGCGACGATGATG  
ACGGTAGCGTGAGAAGAAGCCCCGGCTAACTTCGTGCCAGCAGCCGCGGTAATACGAAGG  
GGGCAAGCGTTGTTCCGAATTACTGGGCGTAAAGCGCACGCAGGCGGTGTTCTAGTTAG  
AAGTGAAAGCCCCGGGCTCAACCTGGGAACTGCTTTTAATACTGGACAGCTAGAATCATG  
GAGAGGGTAACGGAATTC CGAGTGTAGAGGTGAAATTCGTAGATATTTCGGAAGAACACCA  
GCGGCGAAGGCGGTTACCTGGCCATGTATTGACGCTCATGTGCGAAAGCGTGGGGAGCAA  
ACAGGATTAGATACCCTAGTAGTCC

>Otu4688

CCAGCCTATGGGTTGCTGCAGTGGGGAATTTTCCACAATGGGCGAAAGCCTGATGGAGCA  
ACGCCGCGTGTTGTGATGAAGGTCTTCGGATCGTAAAGCACTTTCGACCGGGACGAAGAAC  
TGTTGGCTAATATCCAACAGCCTGACGGTACCGGGAGAAGAAGCACCGGCTAACTCTGTG  
CCAGCAGCCGCGGTAATACAGAGGGTGCAAGCGTTGTTTCGGAATTATTGGGCGTAAAGCG  
CGTGTAGGCGGCTTATCAAGTCAGATGTGAAAGCCCTCGGCTCAACCGAGGAAGTGCGTC  
TGAAACTGATGAGCTTGAGTACCGGAGAGGGTAGCGGAATTCGCAAGTAGAGGTGAAAT  
TCGTAGAGATGCGGAGGAACACCGGTGGCGAAGGCGGCTACCTGGACGGTCACTGACGCT  
GAGACGCGAAAGCGTGGGGAGCAAACAGGATTAGAAACCC TTGTAGTCC

>Otu4690

CCAGCCTATGGGTTGCAGCAGTCGAGAGTCTTCGGCAATGGGCGAAAGCCTGACCGAGCG  
ACGCCGCGTGAGAGGATGAAGGCCTTCGGGTGTAAACTCCCGTCACGGTGCAGGAAACGA  
TCCAAGGTAATACTTAGGGAACTGACCACACCGAGAGGAAGTCACGGCTAACTCTGTGC  
CAGCAGCCGCGGTAAGACAGAGGTGGCAAGCGTTGTTTCGGAATTACTGGGCATAAAGGGC  
GCGTAGGCGGCGAGGATATGTCAGGGGTGAAAGCCCCGGCTCAACCGGGGAACAGCCTC  
TGAAACTACCTTGCTTGAGTGCAAGAGAGGAGAGTGGAAC TCGAGGTGGAGCGGTGAAAT  
GCGTAGATATCTCAGGGAACGCCGGTGGCGAAAGCGACTCTCTGGTTTGCAACTGACGCT  
GAGGCGCGAAAGCCAGGGGAGCAAACGGGATTAGAAACCCCTGTAGTCC

>Otu4695

CCAGCCTACGGGTGGCAGCAGTAAGGGATATTGCGCAATGGGCGAAAGCCTGACCCAGCA  
ACGCCGCGTGAGGGATGAAGGCCTTCGGGTCGTAAACCTCTTTTCTCAGGGAAGATAATG  
ACGGTACCTGAGGAAGAAGCCACGGCTAACTACGTGCCAGCAGCCGCGGTAATACGTAGG  
TGCGCAGCGTTGTCCGGATTTACTGGGCGTAAAGAGCGCGCAGGCGGTCAATTAGTCGA  
ATGTGAAAGCCCCCGGCTCAACTGGGGAGGGTCATTTCGATACTGTTCTGACTCGAAGGCAG  
GAGAGGGAAGCGGAATTCCCGGTGTAGTGGTGAAATGCGTAGATATCGGGAGGAACACCA  
GTGGCGAAGGCGGCTTCCTGGCCTGTTCTTGACGCTGAGGCGCGAAAGCTAGGGGAGCAA  
ACGGGATTAGATACCCGTGTAGTCC

>Otu4699

CCAGCCTACGGGGCGCTGCAGTGGGGAATATTGCGCAATGGGGGAAACCCTGACGCAGCG  
ACGCCGTGTGAGTGATGAAGACTTTCGGGTCGTAAAGCTCTGTTCGGATGGGACGAATAAG  
GGCTGTGAAAATATTGCAGTCCGATGACGGTACCGTCGAAGGAAGCACCGGCTAACTCCG  
TGCCAGCAGCCGCGGTAATACGGGGGGTGAAGCGTTGTTTCGGAATTATTGGGCGTAAAG  
AACGTGTAGGCGGGTCTGTATGTCAGATGTGAAAGCCCTTGGCTCAACTGGGGAAGTGCA  
TCTGAAACTGCAGGTCTTGAGTACGAGAGAGGAGAGTGGAATTTCCAGTGTAGAGGTGAA  
ATTATAGATATTGGGAAGAACACCGGCGGCGAAAGCGGCTCTCTGGCTCGATACTGACG  
CTGAGACGTGAAAGCGTGGGGAGCAAACAGGATTAGATACCCTCGTAGTCC

>Otu4705

CCAGCCTATGGGTCGCAGCAGTGGGGAATATTGGACAATGGGCGCAAGCCTGATCCAGCA  
ATGCCGCGTGTGTGAAGAAGGTCTTCGGATTGTAAAGCACTTTCGACGGGGACGATGATG  
ACGGTACCCGTAGAAGAAGCCCCGGCTAACTTCGTGCCAGCAGCCGCGGTAATACGAAGG  
GGGCTAGCGTTGCTCGGAATGACTGGGCGTAAAGGGCGCGTAGGCGGATTGTACAGTCAG  
ATGTGAAATTTCCCGGGCTTAACCTGGGGGCTGCATTTGATACGTATGGTCTTGAGTGAGG  
AAGAGGGTCGTGGAATTTCCAGTGTAGAGGTGAAATTCGTAGATATTTCGAAGAACACCA  
GTGGCGAAGGCGGCTCACTGGCCCGGAACTGACGCTGAGACGCGAAAGCGTGGGGATCAA  
ACAGGATTAGATACCCTTGTAAGTCC

>Otu4708

CCAGCCTATGGGTTGCAGCAGGCGAGAAAAATTTTGCAATGCGCGCAAGCGTGACAGAGCA  
AGCCAGAGTGTTTTTCTTTATTTAAAGAACAACCTTTTTCGGGATGTAAATAGTCTCGCGA  
ATAAGGACTGGGCAAGACTGGTGCCAGCCGCCGCGGTAATCCCAGCAGTCCAAGTCGCAG  
CCACTTTTATTGGGTCTAAACATCCGTAGCTTGCTTAGTAAGTCTTTTGTCAAATCTGG  
CATCTTAAGTGTGAGGCGAGCAGAAGATACTGCTTTGCTAGAGACCGGGAGACGTAAGGA  
GTACAGTTTGGGTAGCGGTAAAATGCGTTGATCCTAACTGGACTAACAATAGCGAAGGCA  
CCTTACGAGAACGGATCTGACAGTGAGAGATGAAGGCTAGGGGCGCAAATTGGATTAGAA  
ACCCTCGTAGTCC

>Otu4717

CCAGCCTACGGGGGGCAGCAGTGGGGGATATTGCACAATGGGCGCAAGCCTGATGCAGCG  
ACGCCGCGTGAGGATGAAGGTTTTTCGGATTGTAAACTCCTGTTACGTGGGAAAAAATGC  
TCTGTTTTAAATAAAGCAGGGAGCTGATGGTACCACGAGAGAAAGCACCGGCAAACCTTCGT  
GCCAGCAGCCGCGGTAATACGAAGGGTGCAAGCGTTATTTCGGAATAACTGGGTGTAAAGA  
GCGTGCAGGCGGTTTTGTAAAGTCATTTGTAAAAGAGCTCGGCTTAACTGAGCAACTGCAG  
ATGAAACTGTAAGACTAGAGTGACAGGAGAGAAAGGTAGAATTCTCGGAGTAGCGGTAAAA  
TGCGTAGATCTCGAGAGGAATACCGGTTGCGAAGGCGGCCTTTTGGCCTGTAAGTACGCG  
TCAAGCGCGAAAGCGTGGGGAGCAAACAGGATTAGAGACCCCGAGTCC

>Otu4718

CCAGCCTATGGGAGGCTGCAGCTAAGAATATTCCGCAATGGACGAAAGTCTGACGGAGCG  
ACGCCGCGTGATGACGAAGGCCGAAAGGTTGTAAAGTCCTTTTGTGGGGAAGAATAAC  
CATGGGAGGGAATGCCCGTGGGATGACATGAACCGACGAATAAGCCCCGGCTAACTACGT  
GCCAGCAGCCGCGGTAACACGTAGGGGGCGAGCGTTGTTTCGGAATTATTGGGCGTAAAGG  
GCGCGCAGGCGGTGCGGTAAGTCACCTGTGAAATCTCTGGGCTTAACTCAGAGCCTGCAG  
GCGAAACTGCCGTGCTGGAGTGTGGGAGAGGTGCGTGGAATTTCCCGGTGTAGCGGTGAAA  
TGCGTAGATATCGGGAGGAACACCTGTGGCGAAAGCGGCGCACTGGACCACAACCTGACGC  
TGAGGCGCGAAAGCTAGGGGAGCAAACAGGATTAGAAACCCGGGTAGTCG

>Otu4726

CCAGCCTATGGGGTGCAGCAGTCGAGAATCATTTTGCAATGGGCGAAAGCCTGACAATGCG  
ACGCTGCGTGAGCGAAGAAGGCCTTCGGGTTGTAAAGCTCTTTTCGCTTGGGAACAAGAGA  
TGCCGGCGAACATCCGGCAAATTTGAGCGTACCAGGTAAAGAAGCACCGGCTAACTCCGT

GCCAGCAGCTGCGGTAATACGGAGGGTGCAAGCATTAATCGGATTTATTGGGCGTAAAGG  
GCGCGTAGGCGGTTATGAAAGTCAGATGTGAAATCCCGGGGCTCACCCCCGGAACAGCAT  
TTGAAACTCCATGACTAGAGGGTAGGCGGAGAAAACGGAATTCACACAAGTAGCGGTGAAA  
TGCGTAGATATGTGGAAGAACACCAGTGGCGAAGGCGGTTTTCTAGCTTATTCCTGACGC  
TGAGGCGCGAAAGCAAGGGGATCAAACAGGATTAGAAACCCCTGTAGTCC

>Otu4727

CCAGCCTATGGGTCGCAGCAGTAGGGAATATTGCGCAATGGGGGAAACCCCTGACGCAGCG  
ACGCCGCGTGGGCGACGAAGGCCTTCGGGTCGTAAAGCCCTTTTGGCAGGGACGAGTGAG  
GACGGTACCTGCCGAATAAGTCTCGGCTAACTACGTGCCAGCAGCCGCGGTAAAACGTAG  
GAGGCGAGCGTTATCCGGATTCACTGGGCGTAAAGCGAGCGTAGGCGGTTGGGTAAAGTCG  
GACGTGAAAGCCCCCTGGCTCAACTGGGGGAGGCCGTTGATACTGCCCCGGCTTGAGGGTG  
AGAGAGGGAAGTGGAATTCCTGGTGTAGCGGTGGAATGCGTAGAGATCGGGAGGAACACC  
AGTGGCGAAAGCGGCTTCCTGGCTCACCCCTGACGCTGATAGCTCGAAAGCGTGGGGAGC  
AAACGGGATTAGAAACCCCTAGTAGTCC

>Otu4729

CCAGCCTACGGGGGGCACCAGTGAGGAATATTGGACAATGAGCGAAAGCTTGATCCAGCA  
ATGTCACCTTGGAGTGTGGAAGGCTATTTAGGTCGTAAAGCTCTTTTAATAGTTCTAATTG  
TGATATCGGCTATTGAATAAGTCCCGGCTAACTTCGTGCCAGCAGCCGCGGTAAAACGGG  
GGGGCGAGCGTTATTCATAATGATTGGGCGTAAAGAGGGTGCGCAGGTGGCTTTACCAG  
CTTTATATGAAAGAACAGGACTTAGTTCTGTGTTGGTATAAAGGACGTAATAAGCTAGGT  
TTTTTGAGAAGAAGGCGGTACTCTTAGTGGTAGAGGTGAAATTCGGTAACAGTGTAGAGG  
ACCAACAAGAGGCAAAGGCGGCTTTCTAGCAAAAATTGACACTCAGGCACGAAAAGCATG  
GGTAGCAAATGGGATTAGATACCCGAGTAGTCC

>Otu4730

CCAGCCTACGGGTTGCACCAGTGAGGAATATTGGGCAATGCCCCGTAAGGGTGACCCAGCA  
ACGCCGCGTGGAGGATGAAGGTCGTAAGATTGTAAACTCCTGTTAGAGGGGACGAATAGC  
TGTGATTTCGTAAGGATCATAGTTTGACTGTACCCTCAGAGAAAGCCCCGGCTAACTACGT  
GCCAGCAGCCGCGGTAATACGTAGGGGGCAAGCGTTGTCCGGATTTACTGGGTGTAAAGG  
GCGCGCAGGCGGGCTTGTAAGTCGGTGGTGAAAGCCTGTGGCTTAACTACAGAACTGCCA  
TTGATACTACAAGTCTTGAGTGCGGAAGAGAGACGGAATTCAGGTGTAGTGGTGAAA  
TACGTAGATATCTGGAAGAACACCAGTTGCGAAGGCGGTCTCTTGGTCCGTTACTGACGC  
TCAGGCGCGAAAGCGTGGGTAGCAAACAGGATTAGAAACCCCTGGTAGTCC

>Otu4731

CCAGCCTATGGGTGGCTCCAGTCGAGGATCATTTGCAATGGGCGAAAGCCTGACAGTGCG  
ACGCTGCGTGGAGGATGAAGGCCTTCGGGTCGTAAACTCCTGTCATTTCGGAACAATAGT  
CTGAGTGTTAATACCACTTGGAATGATGGTACCGGAAGAGGAAGCCACGGCTAACTCTG  
TGCCAGCAGCCGCGGTAATACAGAGGTGGCGAGCGTTGTTCGGATTTACTGGGCGTAAAG  
GGTGCCTAGGTGGTTCCGTACGTGCGGTGTGAAATCCCACTGCTCAACGGTGGAAGGTCG  
CCCGAAACTGCGGGGCTAGAGTGCAGGAGGGGAGAGCGGAATTCCTGGTGTAGCGGTGAA  
ATGCGTTGATATCAAGAAGAACACCGGCGGCGAAGGCGGCTCTCTGGAATGCAACTGACA  
CTGAGGCACGAAAGCTGGGGGAGCAAACAGGATTAGAGACCCCGTAGTCC

>Otu4737

CCGCCTACGGGAGGCAGCAGGCGCGAAACCTTTGCCATGCGCGAAAGCGTGACAGGGGAA  
TTCCGAGTGGTAGGATGGTTTTACCTTCCTATCTTTTGGCCAATCCAAACAATTGGCAGA  
ATAAGATCTGGGTAAGACCAGTGCCAGCCGCCATGTGTGTGTAGTTGCACCCACATAGCA  
CGGTACGCGGTAATACTGGCAGAGCGAGTGGTGTCCACGAATATTGGGTCTAAAGAGTCC  
GTAGCTGGACTGTTAAGTCCACTGTGAAATCCGGCGGCTCAACCGCCGGGCGTGACAGTGG  
ATACTGGCAGGCTTGGGAGCGGGGAGGTCAGGAGTACTTGCGGGGTAAGAGTAAATCT  
GTTGATCCTGCAAGGACTACCAAGTGGCGAAGGCGCCTGACCAAAACGCGTCCGACAGTGA  
GGGACGAAGGCTAGGAGAACGAATCGGATTAGATACCCGAGTAGTCC

>Otu4740

CCGCCTATGGGTTGCAGCAGTGAGGAATATTGCGCAATGCCCCGAAAGGGTGACGCAGCGA  
CGCCGCGTGGAGGATGAAGGCCCTATGGGTCGTAAACTCCTTTTATGAGAGAATAATTTG  
GCGCTATACGCGCCATTGAATGTATCTCAGGAAAAAGCATCGGCTAACTACGTGCCAGCA  
GCCGCGGTAATACGTAGGATGCGAGCGTTGTCCGGATTCCTGGGTGTAAAGGGAGCGCA  
GGCGGGTTCGGTAAGTCATTGGTGAAATACTCGGGCTCAACCCGGGAACTGCCACTGATAC  
TGCTGATCTTGAGTGCGAAGAGGTTGATAGAATTCTAGGTGTAGCGGTGAAATGCGTAG  
ATATCTAGAAGAATACCGATGGCGAAGGCAGTCAACTGGTCTGCTACTGACGCTCATGCT

CGAAAGCGTGGGGATCAAACAGGATTAGATACCCGCGTAGTCC

>Otu4745

CAGCCTATGGGATGCTGCAGCTAAGAATATTCCGCAATGGGAGAAATCCTGACGGAGCGA  
CGCCGCGTGGAAGATGAAGGCCGAAAGGTTGTAAATTCCTTTTATACGGGAAGAATAAGG  
TTAGGATGGGAATGCCTAATCGATGACGGTACCGTATGAATAAGCCCCGGCTAACTACGT  
GCCAGCAGCCGCGTAATACGTAGGGGGCAAGCGTTGTTTCGGATTTACTGGGCGTAAAGG  
GCATCTAGGCGGTTATGTAAGTGTGGATTTAAAGGCAGAGGCTTAACCTCTTGCATGGTC  
TGCAAACCTGCATAACTAGAGTGCAGAAGGGGAACTGGAATTCGCAAGTAGGGGTGAAA  
TCTGTAGATATGCGGAAGAATACCGGTGGCGAAGGCGAGTTTCTGGTCTGTAACCTGACGC  
TGAAATGCGAAAGTGTGGGGAGCAAACAGGATTAGAAACCCCCGTAGTCC

>Otu4746

CCAGCCTACGGGGGGCAGCAGTGGGGAATTTTTCGCAATGGGGGAAACCCTGACGCAGCA  
ACGCCGCGTGAGGATGAAGCCCCTTGGGGCGTAAACTCCTTTTCGACCGGGACGATACTG  
ACGGTACCAGAGGAATAAGCATCGGCTAACTTCGTGCCAGCAGCCGCGGTAATACGAAGG  
ATGCAAGCGTTATCCGGATTTATTGGGTTTAAAGGGTTCGTAGGCGGACTTATAAGTCAG  
TGGTGAAATCTCATCGCTTAACGATGAACGTGCCATTGATACTGTAGGTCTTGAGTACAG  
ATGCCGTTGGCGGAATGTGTCATGTAGCGGTGAAATGCATAGATATGACACAGAACACCG  
ATTGCGAAGGCAGCTGACGAAACTGTAACCTGACGCTGAGGCACGAAAGCGTGGGGATCAA  
ACAGGATTAGATACCCTCGTAGTCC

>Otu4747

CCAGCCTACGGGATGCAGCAGTGGGGAATTTTTCGCAATGGGGGAAACCCTGACGCAGCA  
ACGCCGCGTGAGGATGAAGTACTTCGGTACGTAAACTCCTTTTCGATCGGGACGATAATG  
ACGGTACCGBAAGAAGAAGCCCCGGCTAACTTCGTGCCAGCAGCCGCGGTAATACAGAGG  
TCCAAGCGTTGTTTCGGATTCCTGGGCGTAAAGGGTTCGTAGGTGGCGAAGTAAGTCGG  
ATGTGAAATCTCCGAGCTCAACTCGGAACTGCATTGGAACTACTTTGCTCGAGGGTTG  
GAGGGGGGACTGGAATACTTGGTGTAGCAGTGAAATGCGTAGATATCAAGTGGAACACCA  
GTGGCGAAGGCGAGTCCCTGGACAACTCCTGACACTGAGGCACGAAAGCTAGGGGAGCAA  
ACAGGATTAGAGACCCTAGTAGTCC

>Otu4752

CCAGCCTACGGGTTGCTGCAGTGGGGAATTTTTCGCAATGGGGGAAACCCTGACGCAGCA  
ACGCCGCGTGAGTGATGAAGGCCTTCGGGTCGTAAAGCTCTGTGAGAGGGAAGGAAGTGT  
AGGAGGGTTAATACCCCTTTTACTTGACGGTACCCTCAAAGGAAGCACCGGCTAACTCCG  
TGCCAGCAGCCGCGTAATACGGGGGGTGTAGCGTTATTCGGAATTACTGGGCGTAAAG  
CGCGTGCAGGCGGGCTAGCAAGTCTGATGTGAAAGCCCTGGGCTTAACCTGGGAAGTGCA  
TTGGAACCTGCTGGTCTTGAGTGCTGGAGAGGAAGGGGGAATTCCCGGTGTAGAGGTGAA  
ATTCGTAGAGATCGGGAGGAATACCAGTGGCGAAGGCGCCCTTCTGGACGGCAACTGACG  
CTGAGACGCGAAAGCGTGGGGAGCAGACAGGATTAGATACCCTAGTAGTCC

>Otu4753

CCAGCCTACGGGGCGCACCAGTGGGGAATATTGGACAATGGGGGAAACCCTGATCCAGCA  
ATGCCGCGTGGGTGAAGAAGGTCTTCGGATTGTAAAGCCCTTTTCGGCGGGGACGATGATG  
ACGGTACCCGCGAGAAGAAGCCCCGGCTAACTTCGTGCCAGCAGCCGCGGTAATACGAAGG  
GGGCTAGCGTTGCTCGGAATGACTGGGCGTAAAGGGCGCGTAGGCGGTTTGGACAGTCAG  
ATGTGAAATTCGCGGGCTTAACCTGGGGGCTGCATTTGATACGTCCAGGCTTGAGTGAGG  
AAGAGGGTTGTGGAATTCTCAGTGTAGAGGTGAAATTCGTAGATATTGGGAAGAACACCG  
GTGGCGAAGGCGCAACCTGGTCCTTTACTGACGCTCATAACGAAAGCTAGGGGAGCGA  
ACGGGATTAGAAACCCAGTAGTCC

>Otu4757

CCAGCCTACGGGTGGCAGCAGTGGGAATATTGGACAATGGGCGCAAGCCTGATCCAGCCA  
TGCCGCGTGAGTGAAGAAGGCCTTAGGGTTGTAAAGCTCTTTTGGCGGGGACGATAATGA  
CGGTACCCGCGAGAATAAGCCCCGGCTAACTTCGTGCCAGCAGCCGCGGTAATACGAAGG  
GGCTAGCGTTGTTTCGGAATCACTGGGCGTAAAGCGCACGTAGGCGGATCTTTAAGTCAGA  
GGTGAAATGCCAGGGCTCAACCTTGGAAGTGCCTTTGATACTGGAGATCTCGAGTCCGGG  
AGAGGTGAGTGGAAGTGCAGTGTAGAGGTGAAATTCGTAGATATTGCAAGAACACCG  
TGGCGAAGGCGGCTCACTGGCCCCGGTACTGACGCTGAGGTGCGAAAGCGTGGGGGGCAA  
CAGGATTAGATACCCAGTAGTCC

>Otu4758

CCAGCCTACGGGACGCAGCAGTGGGGAATTTTGGACAATGGGCGCAAGCCTGATCCAGCC  
ATTCCGCGTGAGTGAAGAAGGCCTTCGGGTTGTAAAGCTCTTTTCGGCAGGGAAGAAACGG



TATGGGTAAATACCCCGTGCTAATGACGGTACCTGAAGAAGAAGCAACGGCTAACTACGT  
GCCAGCAGCCGCGGTAATACGTAGGGTGCGAGCGTTAATCGGAATTACTGGGCGTAAAGC  
GTGCGCAGGCGGTTTTGTAAAGACAGGTGTGAAATCCCCGGGCTTAACCTGGGAAGTGC  
TTGTGACTGCAAGACTCGAGTACGGCAGAGGGGGGTGGAATTCACGTGTAGCAGTGAAA  
TGCGTAGAGATGTGGAGGAACACCGATGGCGAAGGCAGCCCCCTGGGTCGATACTGACGC  
TCATGCACGAAAGCGTGGGGAGCAAACAGGATTAGATAACCCGTGTAGTCC

>Otu4760

CCAGCCTATGGGTGGCTGCAGTGGGGAATTTTGCGCAATGGGGGAAACCCCTGACGCAGCA  
ACGCCGCGTGAGGATGAAGCCCCCTTGGGGTGTAAGTCCCTTCGACTGGGAAGATTATG  
ACGGTACCAGTGGAAGAAGCACCGGCTAACTCTGTGCCAGCAGCCGTGGTAATACGAGGG  
GGGCAAGCGTTGTTTCGGAATTATTGGGCGTAAAGGGTGCGTAGGCGGTTTGTTAAGTCTT  
TTGTGAAATCTATGGGCTCAACTCATAGACTGCAAGGGGAACTGCCGGGCTTGAGTGTGG  
GAGAGGTGCGTGGAATTCCTGGTGTAGCGGTGAAATGCGTAGATATCGGGAGGAACACCT  
GTGGCGAAAGCGGCGCACTGGACCACTACTGACGCTGATGCGCGAAAGCTAGGGGAGCAA  
ACAGGATTAGAAACCCGAGTAGTCC

>Otu4763

CCAGCCTACGGGGGGCTGCAGTCGAGAATCTTCCACAATGGACGAAAGTCTGATGGAGCG  
ACGCCGCGTGATTGATGAAGTCCCTCTGGGACGTAAAGATCTTTTATGAGGGGAGAAGTT  
TATTGACTGTACCTCATGAATAAGAGGCTCCTAATCTCGTGCCAGCAGGAGCGGTAATAC  
GAGAGCCTCGAGCGTTATCCGGAATTATTGGGCGTAAAGGGTGCGTAGGTTGTTCTGTTA  
GTCAATTGTTAAACTCTGGGCTTAACCTAGAATCGGCGATTGAAACGGCAGAACTTGAA  
AGTGCGAGAGGTTTACGGAACCTATGGTGTAGGGGTGAAATCCGTTGATATCATGGGGAA  
CACCAAATGCGAAGGCAGTAACTGGCGCATATTTGACACTGAAGCACGAAAGCGTGGGT  
AGCGAATGGGATTAGATAACCCAGTAGTCC

>Otu4764

CCAGCCTACGGGGTGCTCCAGTCGAGAATCTTCCGCAATGGACGAAAGCCTGAAGGAGCG  
ACGCCGCGTGGGGGATGAATGGCTTCGGCCCGTAAACCCCTGTCATTTCGGGATCAATGCG  
TCTGGGTGAACATCCCAGACGTTGATAGTACCGGAAGAGGAAGGGACGGCTAACTCTGTG  
CCAGCAGCCGCGGTAATACAGAGGTCCCAAGCGTTGTTTCGGAATTTACTGGGCGTAAAGGG  
TGCGTAGGTGGTTGGGTAAGTTTGATGTGAAATCTCCGGGCTCAACTCGGAGTCTGCAGG  
AGAACTGCCGTGCTTGAGTATGGGAGAGGTGAGTGGAATTCCTGGTGTAGCGGTGAAAT  
GCGTAGATATCAGGAGGAACACCTGTGGCGAAAGCGGCTCACTGGACCATAACTGACGCT  
GATGCACGAAAGCTAGGGGAGCAAACAGGATTAGATAACCCCGTAGTCC

>Otu4767

CCAGCCTACGGGGTGCGAGCAGTAGGGAATTTTGGGCAATGGGCGAAAGCCTGACCCAGCA  
ACGCCGCGTGAAAGGATGAAGGCCTTCGGGTGTAAACCTTCTGTTGGATGGGAAAAAATC  
CCGACTTGTCGGGACTGATGGTACCATTTCGAGTAAGCACCGGCTAACTACGTGCCAGCAG  
CCGCGGTAATACGTAGGGTGCAAGCGTTGTTCGGAATTACTGGGCGTAAAGGGAGCGTAG  
GCGGAAACCTAAGTTAGGAGTTTAATTCTCGGGCTTAACCCGAGGCTGGCTTTTAATACT  
GGGTTTCTTGAGTATGGAAGAGGATGATGGAATTCAGGTGTAGCGGTGGAATGCGTAGA  
TATCTGGAAGAACACCAGTAGCGAAGGCGGTCATCTGGTCCAATACTGACGCTGAGGCTC  
GAAAGCTAGGGGAGCAAACAGGATTAGAAACCCCGTAGTCC

>Otu4768

CCAGCCTATGGGTTGCTGCAGTGGGGAATTTTGCGCAATGGGGGAAACCCCTGACGCAGCA  
ACGCCGCGTGAGTGATGAAGGCCTTCGGGTGCTAAAGCTCTGTGAGAGGGAAGAAGTGT  
AAGCTGGCTAATACCCGGTTTACTTGACGGTACCCTCAAAGGAAGCACCGGCTAACTCCG  
TGCCAGCAGCCGCGGTAATACGGAGGGTGCGAGCGTTGTTTCGGAATTATTGGGCGTAAAG  
CGCGTGTAGGCGGTTTTTTAAGTCTGATGTGAAAGCCCTGGGCTCAACCCGGGAAGTGCA  
TTGGAAGTGGGAGACTTGAATACGGGAGAGGGTAGTGGAATTCCTGGTGTAGGAGTGAA  
ATCCGTAGATATCGGAAGGAACACCTGTGGCGAAAGCGGCTCACTGGACCACAAGTACG  
CTGATGCACGAAAGCTAGGGGAGCAAACAGGATTAGAGACCCAGTAGTCC

>Otu4772

CCAGCCTATGGGGGGCTGCAGTCGAGAATCTTCCGCAATGGGCGAAAGCCTGACGGAGCG  
ACGTTACGTGAATGAAGAAGCCCTTCGGGGTGTTAAGTTCTTTTATATGGGAGGAAGTTA  
TTGACAGTACCATATGAATAAGGGGATCCTAATTCTGTGCCAGCAGGAGCGGTAATACAG  
AATCCCCAAGCGTTACCCGGATTTATTGGGCGTAAAGGGTCCGTAGGTGGTAAAGTAAAGT  
TGAAAGTTAAAGCTCATCGGCTTAACCTTTGAGATTCTTTCAATACTGCTATACTAGAGG  
ATGTTAGGGGTGAACGGAACCGACGGAGTAGGGGTGAAATCCGTTGATATCGTCGGGAAC

ACCAAAAGCGAAGGCAGTTCCTAGGACAAATCCTGACACTGAGGGACGAAAGCGTGGGGA  
TCAAAAAGGATTAGAGACCCCTGTAGTCC  
>Otu4773  
CCAGCCTACGGGTTCGAGCAGTGGGGAATATTGGACAATGGGCGCAAGCCTGATCCAGCC  
ATGCCGCGTGAGTGAAGAAGGCCTTAGGGTTGTAAAGCTCTTTTGGCGGGGACGATAATG  
ACGGTACCCGCGAGAATAAGCCCCGGCTAACTACGTGCCAGCAGCCGCGGTAACACGTAGG  
GGGCGAGCGTTGTTTCGGAATTACTGGGCGTAAAGGGCATGTAGGCGGCTTTTGTAAAGCCC  
GGCGTGGAAGCCCACGGCTCAACCGTGGGATTGCGTTGGGAACTGCGAGGCTTGAATCAT  
GGAGAGGGAGCTAGAATTCCTGGTGTAGGGGTGAAATCTGTAGAGATCAGGAAGAATACC  
AGTGCGCAAGGCGAGCTCCTGGCCAATGATTGACGCTGAGGTGCGAAAGTGTGGGGAGCA  
AACCGGATTAGAGACCCGAGTAGTCC  
>Otu4785  
CCAGCCTATGGGGGGCAGCAGTTAAGAATCTTGGACAATGGACGAAAGTCTGATCCAGCG  
ACGCCGCGTGAACGATGAAGGTCTTCGGATTGTAAAGTTCAATAAGATGGGGAGAAAAAG  
CGCATGGTAATATCGTGCGTCTTGACGGTACCATCCTAAAGCCTCGGCTAAATACGTGCC  
AGCAGCCGCGGTAATACGTATGAGGCAAGCGTTGTTTCGGAATTATTGGGCGTAAAGGGCA  
TCTAGGCGGGATGTTAAGTCAGGTGTGAAAGCTAAGGGCTCAACCCTTAACTGCATTTG  
ATACTGACATTCTTGAGTTCAGAAGAGGAAGGCGGAATTCCCGGTGTAGCGGTGAAATGC  
GTAGATATCGGGAAGAACACCGGTGGCGAAGGCGGCCTTCTGGTCTTGAAGTACGCTGA  
CATGCGAAAGTGTGGGGATCAAACGGGATTAGATACCCCCGTAGTCC  
>Otu4791  
CCAGCCTACGGGTTCGCTGCAGTCGAGAATATTCCACAATGGGCGAAAGCCTGATGGAGCG  
ACGCCGCGTGCGGGATGAAGGCCCTTGGGTGTAAACCGCTTTTATAGAGGAAAAATGTA  
ATGATGGTACTCTATGAATAAGAGTTACTAACTCTGTGCCAGCAGTAGCGGTAATACAG  
AGACCTCAAGCGTTATCCGGATTTATTGGGCGTAAAGAGCATGTAGGCGGTTTTTGCTAGT  
CAGATGTCAAATCTTTGAGCTCAACTCGAAAAGTGCATTTGAAACGGCAAACTAGAGAA  
AGCGAGAGACCAGTGGAACATATGGTGTAGCAGTGAAATGCGTTGATATCATATGGAACA  
CCAAAGGCGAAGGCATCTGGTTGGCGCTTTTCTGACGCTGAGATGCGAAAGCGTGGGTAG  
CGAATGGGATTAGATACCCCGTAGTCC  
>Otu4793  
CCAGCCTATGGGTTCGCTGCAGTGGGGAATCTTGACAATGTGGGAAACCCTGATGCAGCG  
ACGCCGCGTGGGGGTGACGGCCTTCGGGTGTAAACCCCTTTTACAGAGGAAGAAATAT  
GACGGTACTCGTGGAATAAGTCTTGGCTAACTACGTGCCAGCAGCCGCGGTAATACGTAG  
AAGGCGAACGTTATCCGGATTTACTGGGCGTAAAGCGGTGTAGACGGTTTTTTAAGTCA  
GTTGTGAAATCTCCTGACTCAATTGGGAGACTGCAATTGATACTGGAGGACTTGAGGGCA  
TCAGAAGAAAGCGGAATTCCCGGTGTAGCGGTGAAATGCGTAGATATCGGGAGGAACACC  
AGTGCGCAAGGCGGCTTTCTAGGATGCTCCTGACGTTGAGGCCCGAAAGTGTGGGGAGCG  
AAACGGATTAGAAACCCGTGTAGTCC  
>Otu4794  
CCAGCCTACGGGTGGCTGCAGTCGGGAAACTTTTGCAATACACGAAAGTGTGACAAAGCA  
AGCCAGAGTGCTTTTCATTTTTGAAAAGCTTTTGTGAGATGTAAAAAGTCTTACGAATAA  
GGACTGGGCAAGACTGGTGCCAGCCGCCGCGGTAATCCCAGCAGTCCAAGTCGCAGCCAC  
ATTTGTTGGGTCTAAAACATCCGTAGCTCGTCTTTCAAGTCTTTTGTGAAATCGGGACTC  
TTAAGGTTCCGGCGGGCAAAAGATACTGTAAGGCTAGAGACCGGGAGGCGCAGAAAGTAC  
ATATAGGGTAGCGGTAAAATGCTCTGATCCTATATGGACTAACAGTCGTGAAGGCGTTCT  
GCGAGAACGGTTCTGACAGTGAGGGATGAAGGCTAGGGGCGCAAAGGGATTAGAAACCC  
TCGTAGTCC  
>Otu4799  
CCAGCCTACGGGTTCGAGCAGTGGGGAATTTTTCGCAATGGGGGAAACCCTGACGCAGCA  
ACGCCGCGTGAGTGATGAAGGCCTTCGGGTGCTAAAGCTCTGTCAGAGGGAAAGAAGTGT  
AGGAGGGTTAATACCCCTTTTACCTGACGGTACCCTCAAAGGAAGCACCGGCTAACTCCG  
TGCCAGCAGCCGCGGTAATACGAAGGGGGCTAGCGTTGTTTCGGAATCACTGGGCGTAAAG  
CGCACGCAGGCGGATTGATAAGTCAGGGGTGAAATCCCGGGGCTCAACCTCGGAATTGCC  
TTTGATACTGTCTATCTTCGAGTTCGGGAGAGGTTGGCGGAATTCCTAGTGTAGAGGTGA  
AATTCGTAGATATTAGGAAGAACACCAAGTGGCGAAGGCGGCCAACTGGCCCCGATACTGAC  
GCTCATGTGCGAAAGCGTGGGGAGCAAACAGGATTAGATACCCGAGTAGTCC  
>Otu4801  
CCAGCCTACGGGTGGCTGCAGTGAGGAATTTTGGACAATGGGGGAAACCCTGATCCAGCG

ACGCCGCGTGGAGGACGAAGGTCTTCGGATTGTAACTCCTTTTGTCCGGGAATAATAAA  
TCTGTAGAAATACAGAGATTGAATGTACCGGATGAATAAGCCACGGCTAACTTCGTGCCA  
GCAGCCGCGGTAAATACGAAGGTGGCAAGCGTTACTCGGAATTACTAGGCGTAAAGCGCAG  
GTAGGTGGTTGTGTAAGTCTGCTGTGAAAGCTCCCGGCTTAAGTGGGAGAGGTGAGCGGA  
TACTGCATAGCTAGAGTGTGGGAGAGGGTACTGGAATTCGCGGTGTAGCGGTGAAATGCG  
CAGAGATCGGGAGGAACACCAAAGGCGAAAGCAGGTACCTGGACCATTACTGACACTAAG  
CTGCGAAAGCTAGGGGAGCAAACAGGATTAGAAACCCGTGTAGTCC

>Otu4802

CCAGCCTATGGGGTGCTGCAGTGGGGAATCTTGCACAATGGGCGAAAGCCTGACGCAGCG  
ACGCCGCGTGAGTGATGAAGGCCTTCGGGTGTAAAGCTCTGTGGAGGGGGACGAATAAG  
GCCGGGCGAACAATCCGGTCGATGACGGTACCTCTTTAGCAAGCACCGGCTAACTCTGTG  
CCAACAGCCGCGGTAAAGACAGAGGGTGCTAACGTTGTTTCGGAATTACTGGGCGTAAAGCG  
CGTGTAGGCGGCTTTGCAAGTCGGATGTGAAAGCCCTGGGCTCAACCTGGGAAGTGCATT  
CGAAACTGCGGGGCTTGAGTTCTGGAGAGGATGGCGGAATCTCGGTGTAGAGGTGAAAT  
TCGTAGATATCGAGAGGAACACCGGCGGCGAAGGCGGCCATCTGGACAGCGACTGACGCT  
GAGACGCGAAAGCGTGGGGAGCAAACAGGATTAGATACCCCTCGTAGTCC

>Otu4810

CCAGCCTACGGGTTGCTGCAGTCGAGGATTTTTCTCAATGGGGGAAACCCTGAAGGAGCG  
ACGCCGCGTGAGGGATGAAGGTCTTCGGATTGTAAACCTCTGTCATCCGGGATCAAAGCT  
TACGACCTAACACGTCGTGAGTTGATAGTACCGGAAGAGGAAGCCGTGGCTAACTCTGTG  
CCAGCAGCCGCGGTAAATACAGAGACGGCAAGCGTTGCTCGGATTCATTGGGCGTAAAGGG  
TGCGTAGGCGGTTTCGTTAAGTCGGATGTGAAATCTCGCAGCCTAACTGTGATAGGTCAAT  
CGAAACTGACGAGCTTGAGGACTGGAGGGGAGACTGGAATCGCTGGTGTAGCGGTGAAAT  
GCGTAGAGATCAGCGAGAACACCGGTGGCGAAGGCGGGTCTCTGGACAGTTCCTGACGCT  
GAGGCACGAAAGCCAGGGGAGCAAACGGGATTAGATACCCCGGTAGTCC

>Otu4818

CCAGCCTATGGGACGCAGCAGACGAGAATATTCGCAATGGGCGAAAGCCTGACGGAGCG  
ACATCGCGTGATGGATGAAGTGCTTCGGTACGTAAACATCTTTTATCGGGGAAGAAACAA  
ATGACGGTACCCGATGAATAAGGGGCTCCTAACTCTGTGCCAGCAGGAGCGGTAATACAG  
AGGCCCCAAGCATTACCCGGAATCACTGGGCGTAAAGGGTGTCCAGGCGGCCCTATTAGT  
CTCTCGTAAAATCCGTGAGCTCAACTTACGGCGCGCGAGGGAAACGGTAGGGCTCGAGGG  
CGCGAGAGGTGCACGGAACCTCATGGTGGAGGGGTGAAATCCGTTGATATCATGGGGAAACA  
CCAAAGGCGAAGGCAGTGCCTGGCGCGTTCCTGACGCTCACACACGAAAGCCAGGGTAG  
CGAACGGGATTAGAAACCCTCGTAGTCC

>Otu4824

CCAGCCTATGGGAGGCAGCAGTGGGGAATATTGCACAATGGGCGAAAGCCTGATGCAGCG  
ACGCCGCGTGAGGATGAAGGTTTTTCGGATTGTAACTCCTGTTAAGTGGGAAGAAAGAC  
TGATACCTAATACGTATTGGGGATGACGGTACCACTAGAGAAAGCACCGGCAAACCTTCGT  
GCCAGCAGCCGCGGTAAATACGAAGGGTGCAAGTGTTATTTCGGAATCACTGGGCGTAAAGA  
GCGTGAAGGCGGCTTCTTAAGTCAACTGTTAAAGAGCTCGGCTTAAGTGAAGTGCAGG  
GTGATACTGGGAAGCTAGAGTGCAGGAGAGAAAGGTAGAATTCTCGGAGTAGCGGTAAAA  
TGCGTAGATCTCGAGAGGAATACCGGTTGCGAAGGCGGCCTTTTGGCCTGCTACTGACGC  
TAAAGCGCGAAAGCGTGGGGAGCAAACAGGATTAGATACCCCTTGTAGTCC

>Otu4825

CCAGCCTATGGGAGGCTGCAGTGGGGAATATTGGACAATGGACGCAAGTCTGATCCAGCA  
ATGCCGCGTGAGTGATGAAGGCCTTAGGGTTGTAAAGCTCTTTTACCAGGGATGATAATG  
ACAGTACCTGGAGAATAAGCTCCGGCTAACTCCGTGCCAGCAGCCGCGGTAAATACGGAGG  
GAGCTAGCGTTGTTTCGGAATTACTGGGCGTAAAGCGCACGTAGGCGGTTATTCAAGTCAG  
AGGTGAAAGCCCGGAGCTCAACTTCGGAAGTGCCTTTGAAACTAGATAACTAGAATCCTG  
GAGAGGTGAGTGGAATTCGAGTGTAGAGGTGAAATTCGTAGATATTAGGAAGAACACCA  
GTGGCGAAGGCGGCCAACTGGCCCCGATACTGACGCTCATGTGCGAAAGCGTGGGGAGCAA  
ACAGGATTAGAAACCCAGTAGTCC

>Otu4826

CCAGCCTACGGGTTGCAGCAGAGGAGGATCATTCGCAATGGGCGAAAGCCTGACGGTGCG  
ACGCCGCGTGAGGGATGAAGGCCTTCGGGTGTAAACCTCTGTCAGGAGTTAAGAACGAT  
GGGGATGCTAATATCATCTCCATGTGACAAAGGCTCCAAAGGAAGCCACGGCTAACTACG  
TGCCAGCAGCCGCGGTAAATACGTAGGTGGGAAGCGTTACTCGGAATCACTGGGCATAAAG  
GGCGTGTAGGCGGATGCGTAAGTCCGGTGTAAAGCCCTCGGCTCAACCGGGGAAAGCCA

TCGGATACTGCGTGTCTCGAGTGCGGGAGGGGAGAGTGGAACCTCTTGGTGGAGCGGTGAA  
ATGCGTAGATATCAAGAGGAACGCCGGTGGCGAAAGCGGCTCTCTGGCCCCGTTACTGACG  
CTGAGGCGCGAAAGCTAGGGGAGCAAACGGGATTAGAAACCCTCGTAGTCC

>Otu4833

CCAGCCTATGGGGCGCTGCAGTCGAGAATCTTCGGCAATGGGCGAAAGCCTGACCGAGCG  
ACGCCGCGTGTGGGATGAAGGCCTTCGGGTGTAAACCACTGTCAGAGGGGAGGAAATAT  
TGGGAGGATCACCTCTCAGTTTGACCTATCCTCAGAGGAAGGACGGGCTAAGTTCGTGCC  
AGCAGCCGCGGTAATACGAACCGTCCAAACGTTATTTCGGAATCACTGGGCTTAAAGGGTG  
CGTAGGCGGCGCGATAAGTTGGGTGTGAAATACCTCGGCTCAACCGAGGAATTGCGCCCA  
AAACTGCCGTGCTCGAGGGAGACAGAGGTAAAGCGGAACCTAGGGTGGAGCGGTGAAATGC  
GTTGATATCCTAAGGAACACCGGTGGCGAAAGCGGCTTACTGGGTCTCTTCTGACGCTGA  
GGCACGAAAGCTAGGGGAGCGAACAGGATTAGAGACCCTCGTAGTCC

>Otu4834

CCAGCCTACGGGTGGCTGCAGTGAGGAATCTTGCGCAATGGACGAAAGTCTGACGCAGCG  
ACGCCGCGTGCGGGATGAAGGCCTTCGGGTGTAAACCGCTTTCAGCAGGGACGAAATTG  
ACGGTACCTGCAGAAGAAGCCCCGGCCAACTACGTGCCAGCAGCCGCGGTAATACGTAGG  
GGGCAAGCGTTGTCCGATTTATTGGGCGTAAAGAGCTCGTAGGTGGTTCGGTAAGTCGG  
ATGTGAAATCTCCAGGCTCAACCTGGAGGGGTCATTTCGATACTGCCGTGACTAGAGGTG  
GTAGGGGAGTGTGGAATTCCTGGTGGAGCGGTGAAATGCGCAGATATCAGGAGGAACACC  
CGTAGCGAAGGCGGCACTCTGGGCCGATACTGACACTGAGGAGCGAAAGCGTGGGGAGCG  
AACAGGATTAGAAACCCGCGTAGTCC

>Otu4836

CCAGCCTACGGGTGGCAGCAGTGGGGAATATTGGACAATGGGGGCAACCCTGATCCAGCC  
ATGCCGCGTGAGTGAAGAAGGCCTTAGGGTGTAAAGCTCTTTTGGCGGGGACGATAATG  
ACGGTACCCGCAGAAGAAGCCCCGGCTAACTTCGTGCCAGCAGCCGCGGTAATACGAAGG  
GGGCCAGCGTTGCTCGGAATCACTGGGCGTAAAGCGCACGTAGGCGGACTTTTAAGTCGG  
AGGTGAAATCCTGGAGCTCAACTCCAGAACTGCCTTCGATACTGAGAGTCTTCGAGTTG  
GGAGAGGTGAGTGGAAGTGCAGTGTAGAGGTGAAATTCGTAGATATTCGCAAGAACACC  
AGTGGCGAAGGCGGCTCACTGGCCCGATACTGACGCTGAGGTGCGAAAGCGTGGGGAGCA  
AACAGGATTAGATACCCTTG TAGTCC

>Otu4842

CCAGCCTATGGGATGCTGCAGTGGGGAATATTGGACAATGGGGGAAACCCTGATCCAGCA  
ATGCCGCGTGATGATGAAGGTCTTCGGATTGTAAAGTACTTTTATTGGTGACGATGATG  
ACGGTAACCAATGAATAAGCTCCGGCTAACTTCGTGCCAGCAGCCGCGGTAATACGAAGG  
GAGCTAGCGTTGTTCCGAATAACTGGGCGTAAAGGGTGCGTAGGTGGTTATGTGCGTTAG  
ATGTGAAATCCCCGGGCTTAACCTGGGAACTGCATTTAATACGGCATATCTAGAGTGCGA  
GAGGGGAAAGCGGAATGGCGAGTGGAGCAGTGAAATGCATTGAGATTGCTAGAACACCA  
GAGGCGAAGGCGGCTTTCTGGCTCGCTACTGACACTAAGGCACGAAAGCGTGGGGAGCAA  
ACAGGATTAGAAACCCGCGTAGTCC

>Otu4844

CCAGCCTACGGGAGGCAGCAGTGAGGAATATTGCGCAATGGGGGCAACCCTGACGCAGCA  
ACGCCGCGTGAGTGAGGAAGGTTTTCGGATTGTAAAGCTCTGTGAGCGGAAAGAAATGC  
ATGGTGGTTAATATCCATTATGCTTGACGGTACCGCTAAAGGAAGCACCGGCTAACTCCG  
TGCCAGCAGCCGCGGTAATACGGAGGGTGCGAGCGTTGTTTCGGATTTATTGGGCGTAAAG  
CGCGTGTAGGCGGTTTTTTAAGTCTGATGTGAAAGCCCTGGGCTCAACCCGGGAAGTGCA  
TTGGAAACTGGGAGACTTGAATACGGGAGAGGGCAGTGGAATTCCTGGTGAAGGAGTGAA  
ATCCGTAGATATCAGGAGGAACACCGGTGGCGAAGGCGGCTGCCTGGACCGATATTGACG  
CTGAGACGCGAAAGCGTGGGGAGCAAACAGGATTAGAAACCCCGTAGTCC

>Otu4845

CCAGCCTATGGGTGGCAGCAGTGAGGAATATTGCGCAATGGGGGCAACCCTGACGCAGCA  
ACGCCGCGTGGGTGATGAAGGTCTTCGGATCGTAAACCCCTGTCGTGAGGGACGAAGGTC  
GGGGTGTGAACAGCGCCTTGCTTGACGGTACCTGGAGAGGAAGCCCCGGCTAACTCTGT  
GCCAGCAGCCGCGGTAATACAGAGGGGGCAAGCGTTATTTCGGAATTATTGGGCGTAAAGG  
GCGCGTAGGCGGTTTTTTAAGTGGGATGTGCAATCCCCGAGCTTAACTTGGGAACTGCAT  
CCCAGACTGGAAGGCTAGAGTGCTGGAGAGGGTGGTAGAATTCACGTGTAGCGGTGAAA  
TGCGTAGAGATGTGGAGGAATACAGTGGCGAAGGCGGCCACCTGGACAGTAACCTGACGC  
TGAGGCGCGAAAGTGTGGGTAGCAAACAGGATTAGATACCCTAGTAGTCC

>Otu4850

CCAGCCTACGGGGGGCAGCAGTGGGGAATTTTGGACAATGGGCGCAAGCCTGATCCAGCA  
ATGCCGCGTGAGCGATGAAGCCCTTCGGGGCGTAAAGCTCTTTTCGACGGGAACGATAATG  
ACGGTACCCGGAGAAGAAGCTGCGGCTAACTACGTGCCAGCAGCCGCGGTAATACGTAGG  
CAGCAAGCGTTGTTTCGGAGTTACTGGGCGTAAAGAGTGCGTAGGCGGTTCTGTAAGTCTG  
GTGTGAAATCTCCCGGCTTAACTGGGAGGGTGCGCTAGAACTGCGGGGCTGGAGTGTGG  
GAAAGGTAGGCGGAATTCCTGGTGTAGCGGTGAAATGCGTAGATATCAGGAGGAACACCG  
GCGGTGTAGACGGCTTACTAGACCATGACTGACGCTGAGGCACGAAAGCGTGGGTAGCAA  
ACAGGATTAGATACCCCCGTAGTCC

>Otu4851

CCAGCCTATGGGTGGCAGCAGTAAAGAATCTTTCACAATGGGGGAAACCCTGATGAAGCA  
ACACCGCGTGAGGATGAAGGCGTTTTTCGTTGTAACTCCTTTTTCTGAGGGAATAACTTT  
GAAGGTACCTCAGGAATAAGCAGCGGCTAACTACGTGCCAGCAGCCGCGGTAATACGTAG  
GCTGCAAGCGTTATCCGGAATTATTGGGCGTAAAGCGTACGCAGGCGGTTTGTTAAGTTG  
GATGTCAAAGCTATGAGCTCAACTCATAACAGGTATTCAATACTGGCAAGCTGGAGATAG  
GCAGAGGAAAGTGGAATTCTATATGTAGGGGTAAATATCCGTAGATATATAGAGGAACACC  
AAAAGCGAAGGCAGCTTTCTGGGCCTTTCTGACGCTCATGTACGAAAGCGTGGGGAGCA  
AACGGGATTAGAGACCCTAGTAGTCC

>Otu4858

CCAGCCTATGGGATGCACCAGTCGAGAATCTTCCGCAATGGGCGAAAGCCTGACGGAGCG  
ACGTTACGTGAATGAAGAAGCTCTTCGGAGTGTAAGTTCTTTTCTTCGGGAGGAAAGCC  
GCAAGGCTAGACAGTACCGAAGGAATAAGGGGATCCTAATTCTGTGCCAGCAGGAGCGGT  
AAGACAGAATCCCCAAGCGTTACCCGGATTATTGGGCGTAAAGGTCCGTAGGTTGTTT  
GGTAAGTTAAAGTTAAAGCTCATCGGCTTAACCTTTGAGATGCTTTTAATACTGCCAGA  
CTTGAGGGCGTTAGGGGTAAACGGAACCGACGGAGTAGGGGTGAAATCCGTTGATATCGT  
CGGGAACACCAAAAGCGAAGGCAGTTAACTAGAACGACCCTGACACTGAGGGACGAAAGC  
GTGGGGAGCAAAACAGGATTAGAGACCCCAGTAGTCC

>Otu4860

CCAGCCTATGGGTGGCAGCAGTGGGGAATCTTGCAACAATGGGGGCAACTCTGATGCAGCG  
ACGCCGCGTGAGCGATGAAGCCCTTCGGGGTGTAAGCTCTTTTCGGTAGGGACGATGATG  
ACGGTACCTACAGAAGAAGCCCCGGCTAACTTCGTGCCAGCAGCCGCGGTAATACGAAGG  
GGGCTAGCGTTGTTTCGGAATTACTGGGCGTAAAGCGCACGCAGGCGGCTCGTTAAATTAG  
AAGTGAAAGCCCTGGGCTCAACCTGGGAATTGCTTTTAAGACTGGCGAGCTTGAATTCGG  
AAGAGGGCAGTGGAATTCCAAGTGTAGAGGTGAAATTCGTAGATATTTGGAAGAACACCA  
GTGGCGAAGGCAACTGCCTGGTCCGACATTGACGCTCATGTGCGAAAGCGTGGGGAGCAA  
ACAGGATTAGAAACCCCCGTAGTCC

>Otu4866

CCAGCCTATGGGGCGCAGCAGTTGGGAATCTTGCAACAATGGGGGAAACCCTGATGCAGCG  
ACGCCGCGTGAGGATGAAGGATCTAGGTCTGTAACTCCTTTTTTCAGGGAAAGACTTAG  
GACGGTACCCTGAGAATAAGGACCGGCTAACTACGTGCCAGCAGCCGCGGTAAGACGTAG  
GGTCCAAGCGTTGTCCGGATTACTGGGCGTAAAGAGCGCGTAGGCGGCTCGTTAAGTGT  
GAAGCTAAAGCTCCGGGCTCAACTCGGAACTATTTTCGCATACTGGCAAGCTAGAGTGAT  
GCAGAGGTTTGTGGAATTCTTGGTGTAGCGGTGAAATGCGTAGATATCAGGAGGAACACC  
GGTGGTGTAGACGGCTTTCTGGACCGTAACTGACGCTGAGACACGAAAGCGTGGGTAGCA  
AACAGGATTAGAAACCCTTGTAGTCC

>Otu4875

CCAGCCTACGGGAGGCAGCAGTGGGGAATTTTGCGCAATGGGGGAAACCCTGACGCAGCA  
ACGCCGCGTGAGGATGAAGCCCTTGGGGCGTAACTCCTTTTCGACCGGGACGATACTG  
ACGGTACCGGTGGAAGAAGCACCGGCTAACTCTGTGCCAGCAGCCGCGGTAATACAGGGG  
GTGCAAGCGTTGTTTCGGAATTATTGGGCGTAAAGGGCGTGTAGGCGGCTGGACAAGTCAG  
ATGTGAAAGCCCTGGGCTTAACTAGGAAGTGCATTTGGAAGTGTCCGGCTTGAGTAAGG  
GAGAGGAAAGTGGAATTCCTGGTGTAGAGGTGAAATTCGTAGATATCAGGAGGAACACCG  
GTGGCGAAGGCGACTTTCTGGCCCTATACTGACGCTGAGACGCGAAAGCGTGGGTAGCAA  
ACAGGATTAGATACCCGGGTAGTCC

>Otu4878

CCAGCCTACGGGGGGGCTGCAGTGGGGAATTTTGGACAATGGGCGCAAGCCTGATCCAGCC  
ATGCCGCGTGAGTGAAGAAGGCCCTTCGGGTGTAAAGCTCTTTTGTCTGGGAGCAAACCT  
ACTGGGCTAATACCCAGTGGCTGAGAGTACCAGAAGAATAAGCACCGGCTAACTACGTG  
CCAGCAGCCGCGGTAATACGTAGGGTGCAAGCGTTAATCGGAATTACTGGGCGTAAAGCG

TGCGCAGGTGGTTATGTAAGCTTGATGTGAAATCCCCGGGCTCAACCTGGGAACCTGCATT  
GAGGACTGCATAGCTAGAGTGTGGCAGAGGGGGGTAGAATTCCACGTGTAGCAGTGAAAT  
GCGTAGAGATGTGGAGGAATACCAATGGCGAAGGCAGCCCCCTGGGTAACTGACACT  
CATGCACGAAAGCGTGGGGAGCAAACAGGATTAGAAACCCCTCGTAGTCC

>Otu4881

CCAGCCTACGGGTTGCACCAGTGAGGAATATTGGTCAATGGGCGAAAGCCTGAACCAGCC  
ATGCCGCGTGAAGGATGAAGGCCCTATGGGTTGTAACTCCTTTTGTACGGGACGAACCA  
TTTCTACGTGTAGAGATCTGACGGTACCGTATGAATAAGCAACGGCTAACTCCGTGCCAG  
CAGCCGCGGTAATACGGAGGTTGCAAGCGTTATCCGGATTTATTGGGTTTAAAGGGTGCG  
TAGGCGGGTCTGTAAGTCAGTGGTGAAAGCCTGTAGCTTAACTATAGAAATGCCATTGAT  
ACTACAGAGCTTGAGTACAGTTGAGGTGGGCGGAATGTGTAATGTAGCGGTGAAATGCTT  
AGATATTACACAGAACACCAATTGCGTAGGCAGCTCACTAACTAATACTGACGCTGAGG  
CACGAAAGCGTGGGGAGCAAACAGGATTAGAGACCCCTGTAGTCC

>Otu4886

CCAGCCTACGGGGTGCTGCAGTAGGGAATATTGGTAATCTGCGAAAGCGGGAACCAGCAA  
CGCCGCGTGTGCGAAGAAGGCCCTTAGGGTTGTAAAGCTCTTTTGGCGGGGACGATAATGA  
CGGTACCCGCGAGAATAAGCCCCGGCTAACTTCGTGCCAGCAGCCGCGGTAATACGAAGGG  
GGCTAGCGTTGTTGCGAATCACTGGGCGTAAAGCGCACGCAGGCGGATTGATAAGTCAGG  
GGTGAAATCCCGGGGCTCAACCTCGGAATTGCCTTTGATACTGTTAGTCTTCGAGTTCGG  
GAGAGGTTGGCGGAATTCCTAGTGTAGAGGTGAAATTCGTAGATATTAGGAAGAACACCA  
GTGGCGAAGGCGGCCAACTGGCCCCGATACTGACGCTCATGTGCGAAAGCGTGGGGAGCAA  
ACAGGATTAGATACCCCTCGTAGTCC

>Otu4888

CCAGCCTACGGGACGCACCAGTTCGGAATATTTCGGCAATGGGCGAAAGCCTGACCGAGCG  
ACGCCGCGTGCGGGATGAAGGCCCTTTGGGTTGTAAACCGCTGTCAAAGGTGAGCAAATC  
ACAGGACGATAACATCGTCTTGTGTTGAGTTAGGCTTGAGAGGAAGCCCCGCTAATCAC  
GTGCCAGCAGCGGCGGTAATACGTGAGGGGCGAACGTTGTTGCGGTGTCACTGGGCTTAAA  
GGGTGCGTAGGTGGCTGCGTAAGTAACGTGTGAAAGCCCTCGGCTTACCCGGGGAATTGC  
GCGTTATACTGCGCGGCTTGAGGATCTCAGGGGAAGGGGGAAGTCCAGGTGTAGCGGTGA  
AATGCGCAGATATCTGGGGGAAGGCCGGTGGCGAAGGCGCCCTTCTGGGAGATTCTCTGAC  
ACTGAGGCACGAAAGCGTGGGGAGCAAACAGGATTAGATACCCCTAGTAGTCC

>Otu4892

CCAGCCTATGGGTGCGACCAGTGGGGAATATTGCACAATGGGCGAAAGCCTGATGCAGCA  
ACGCCGCGTGAGCGATGAAGGCCCTTCGGGTCGTAAAGCTCTGTCTCAAGGAAGATAATG  
ACGGTACTTGAGGAGGAAGCCCCGGCTAACTACGTGCCAGCAGCCGCGGTAATACGTAGG  
GGGCTAGCGTTATCCGGAATTACTGGGCGTAAAGGGTGCGTAGGTGGTTTTTTAAGTCAG  
AAGTGAAAGGCTACGGCTCAACCGTAGTAAGCTTTTGAACTAGAGAACTTGAGTGCAGG  
AGAGGAGAGTAGAATTCTAGTGTAGCGGTGAAATGCGTAGATATTAGGAGGAATACCAG  
TAGCGAAGGCGGCTCTCTGGACTGTAAGTACACTGAGGCACGAAAGCGTGGGGAGCAAA  
CAGGATTAGAAACCCTAGTAGTCC

>Otu4893

CCAGCCTATGGGTGGCACCAGTCGAGAATTTTTTCAACAATGGGCGCAAGCCTGATGGAGCG  
ACGCCGCGTGGGGGATGAATGGCTTCGGCCCGTAAACCCCTGTCATTTGCGATCAAACGT  
TATTATTTTAAAGATGATAACCTGATAGTAGCGAAAGAGGAAGGGACGGCTAGCTCTGTG  
CCAGCAGCCGCGGTAATACAGAGGTCCCAAGCGTTGTTGCGATTCACTGGGCGTAAAGGG  
TGCGTAGGTGGCGGGGTAAGTCGGATGTGAAATCTCCGAGCTCAACTCGGAACTGCATT  
GGAACTACCTTGCTCGAGGGTTGGAGGGGGGACTGGAATACTTGGTGTAGCAGTGAAAT  
GCGTAGATATCGAGAGGAACACCAGTGGCGAAGGCGAGTCCCTAGACAATTCTTGGCACT  
GAGGCGCGAAAGCCAGGGGAGCAAACGGGATTAGATACCCCGTAGTCC

>Otu4895

CCAGCCTATGGGGGGCTGCAGTAAGGAATATTGCGCAATGGGCGACAGCCTGACGCAGCA  
ACGCCGCGTGAGAGATGAAGGCCCTTCGGGTCGTAAACTCGTTTTGCCCCGTGACGAGCAAG  
GACGGTAGCGGGCGAAGAAGTCACGGCTAACTACGTGCCAGCAGCCGCGGTAACACGTAG  
GTGGCAAGCGTTATCCGGATTTACTGGGCGTAAAGGGTGTGCAGGCGGACGACCAAGTGG  
TGTATGAAATCTCCGGGCTTAAGTCGGAGGGGTTAGGCCAGACTGGTTGTCTTGAGAGTG  
AGAGAGGGACATGGAATTCTGGGTGTAGTGGTGAAATGCGTAGAGATCCGGAGGAACCTC  
AGAGGCGAAGGCGGTGTCTGGCTCATTTCTGACGCTCAGCCACGACAGCATGGGGAGCG  
AGCGGGATTAGAAACCCAGTAGCC

>Otu4896

CCAGCCTACGGGAGGCACCAGTCGAGAATCTTCGGCAATGGGCACAAGCCTGACCGAGCG  
ACGCCGCGTGAGGAGCAAGGCCTTCGGGTGTAACTCCTGTTCGAGGGGGAGGAAGGGG  
TAACCTTGACCGATCCCTGGAGGAAGCACGGGCTAAGTTCGTGCCAGCAGCCGCGGTAAAG  
ACGAACCGTGCAACGTTATTTCGGAATCACTGGGCTTAAAGCGCGTGTAGGCGGGTGGGA  
ACGTCGGCTTCTGAAAGCCCCGGCTCAACCGGGGAAGTGGAACCGAAACGGCCCCGCTG  
GAGGGACGTAGGGGGACCTGGAACCTCCGGTGGAGCGGTGAAATGCGTTGAGATCGGAAG  
GAACGCCCGTGGCGAAAGCGAGGTCTGGACGTCTGCTGACGCTGAGACGCGAAAGCTAG  
GGGAGCGAACGGGATTAGATAACCCCGTAGTCC

>Otu4897

CCAGCCTATGGGGCGCTGCAGTCGAGAATTTTTTACAATGGGCGAAAGCCTGATGGAGCG  
ACGCCGCGTGGGGGATGAATGGCTTCGGCCCGTAAACCCCTGTCATCTGGGATCAACCCC  
AGCCGGTGAATAGCCGGCTGGCTGATAGTACCGGAAGAGGAAGGGACGGCTAGCTCTGTG  
CCAGCAGCCGCGGTAAAACAGAGGTCCCAAGCGTTGTTTCGGATTCACTGGGCGTAAAGGG  
TGCGTAGGCGGTTCGGTAAAGTCCGATGTGAAATCTCCAGGCTCAACCTGGAAACGGCATT  
GGAAACTATCCGGCTGGAGGGTTGGAGGGGGGACTGGAATTCTCGGTGTAGCAGTGAAAT  
GCGTAGATATCGAGAGGAACACCAGTGGCGAAGGCGAGTCCCTGGACAACCTCTGACGCT  
GAGGCACGAAAGCTAGGGGAGCAAACAGGATTAGAAACCCCTGTAGTCC

>Otu4900

CAGCCTATGGGGTGCTGCAGTCGCGCAACCTTCGCAATGCGCGAAAGCGTGACGAGGGGA  
TTCTGAGTGCCGACTTCACGTCGGCTTTTAGTCAGCTTGAAAAGCTGGCTGAATAAGGAG  
CGGGTAATTGCTGTGCCAGCCGCCGCGGTAAAACAGCTGCTTCAAGTGGTGCCACGAAT  
ATTGAGCCTAAAACGAGTGTAGCGGGCTTGCCAGTTCTCCGCGAAATCCACCAACTTAA  
TTGGTGGGCGCGGGGAATACTACCAGGCTTGGAATGGGGGAGGTGAGGGTACTGCG  
GGGGGAGGAGTAAAATCCTTTAATCCTCGCAGGACCATCGGTGGCGTAGGCGCCTGACCA  
AAACATGTCCGACCGTGAGACTCGAAGGCCAGGGGAGCAAATCGGATTAGAAACCCCACT  
AGTCC

>Otu4909

CCAGCCTATGGGGGGCACCAGTGGGGAATTTTTCGCAATGGGGGAAACCCCTGACGCAGCA  
ACGCCGCGTGAGTGATGAAGGCCTTCGGGTGCTAAAGCTCTGTTCAGAGGGAAAGAAGTGT  
AGGAGGGTTAATACCCCTTTTATTTGACGGTACCGCAAGAATAAGCCCCGGCTAACTTCG  
TGCCAGCAGCCGCGGTAAATACGAAGGGGGCTAGCGTTGTTTCGGAATTACTGGGCGTAAAG  
CGCGTGTAGGCGGGTCTTTAAGTCAGGGGTGAAATGCCAAGGCTCAACCTTGGAACCGCC  
TTTGATACTGGAGATCTTGAGTCCGGGAGAGGTGAGTGGAAGTGCAGTGTAGAGGTGAA  
ATTCGTAGATATTCGCAAGAACACCAGTGGCGAAGGCGGCTCACTGGCCCCGGAAGTACG  
CTGAGACGCGAAAGCGTGGGGAGCAAACAGGATTAGAGACCCCTGTAGTCC

>Otu4915

CCAGCCTATGGGTTGCAGCAGTCAAGAATATTCCTCAATGGACGAAAGTCTGAAGGAGCG  
ACGCCGCGTGATCGATGAAGTCCTTCGGGATGTAAAGATCTTTTATTAGGGAAGAATAAA  
TGACGGTACCTAATGAATAAGAGGTTGCTAACTCTGTGCCAGCAGCAGCGGTAAATACAGA  
GACCTCGAGCGTTATCCGGATTGATTGGGCGTAAAGCGTGCGCAGACTGCCTTTTAAAGTC  
TGCGGTTAAATCCCGATGCTTAACATCGGGACTGCCGCGGAAACTGGATGGCTAGAGTGC  
GGAAGAGGCTAGCGGAATTGCCAGTGTAAACGGTAAATGTGTTAATATTGGCAAGAACAC  
CAGATGCGAAAGCGGCTAGCTGGTACGCAACTGACGTTGATGCACGAAAGCGTGGGTAGC  
GAATGGGATTAGAGACCCCGTAGTCC

>Otu4916

CCAGCCTACGGGTTGCAGCAGTGGGGAATCTTTCGCAATGGGCGAAAGCCTGACGCAGCA  
ATGCCGCGTGAGGGACGAAGGCTTTCTGAGTTGTAAACCTCTTTCAGCAGGGACGATTGT  
GACGGTACCTGCAGAAGAAGCACCGGCCAACTACGTGCCAGCAGCCGCGGTGATACGTAG  
GGTGCAGCGTTGTCCGGATTATTGGGCGTAAGGGCTCGTAGGCGGTTCGATAAGTCGG  
GTGTGAAATCCCCAGGCTCAACCTGGGGTCGCCACTCGATACTGTCTGACTAGAAATCAC  
GTAGGGGACCACGAATTCCAGGTGTAGCGGTGAAATGCGCAGATATCTGGAGGAACACC  
AGCAGCGAAGGCGGTGGTCTGGGCGTGTATTGACGCTGAGGAGCGAAAGCGTGGGGAGCG  
AACAGGATTAGAAACCCCTAGTAGTCC

>Otu4918

CCAGCCTACGGGTGGCTGCAGTGAGGAATATTGGTCAATGGGGGAAACCCCTGAACCAGCG  
ACGCCGCGTGTAGGACGAAGGGGCTTTGCCCTGTAACTACTGTTCGGATGGGAAGAAAAAG  
CACCTCGGGGTGCCGGGACTGTACCATCAAAGGAAGGATCGGCTAACTACGTACCAGCA

GCCGCGGTAATACGTAGGATCCAAGCGTTGTCCGGATTTACTGGGTGTAAAGGGTGCGTA  
GGCGGACTTGTGCGTCAGAGGTTAAATGTCACGGCTTAACCGTGAACCTGCCTTTGATAC  
GGCAAGTCTGGAGTGCGGGAGAGGAAGGTAGAATTCCTGGTGTAGCGGTGAAATGCGTAG  
ATATCAGGAGGAATACCAGTGGCGAAGGCGGCCTTCTGGCCCGCAACTGACGCTGAGGCA  
CGAAAGCGTGGGGAGCAAACAGGATTAGAGACCCTAGTAGTCC

>Otu4922

CCAGCCTACGGGGCGCTCCAGTGGGGAATTTTGCACAATGGGGGAAACCTGACGCAGCA  
ACGCCGCGTGAGTGATGAAGGCCTTCGGGTCGTAAAGCTCTGTCAGAGGGAAAGAAGTGT  
AGGAGGGTTAATACCCCTTTTACTTGACGGTACCCTCAAAGGAAGCACCGGCTAACTCCG  
TGCCAGCAGCCGCGGTAATACGGAGGGTGCGAGCGTTGTTCCGAATTATTGGGCGTAAAG  
CGCACGCAGGCGGCTCGTTAAATTAGAAGTGAAAGCCCTGGGCTCAACCCGGAATTGCT  
TTTAAGACTGGCGAGCTTGAATTCGGAAGAGGGCAGTGGAATTCCAAGTGTAGAGGTGAA  
ATTCGTAGATATTTGGAAGAACACCAGTGGCGAAGGCGACTGCCTGGTCCGACATTGACG  
CTCATGTGCGAAAGCGTGGGGAGCAAACAGGATTAGAGACCCTCGTAGTCC

>Otu4925

CCAGCCTACGGGAGGCTGCAGTGGGGAATTTTGCACAATGCCCCGAAAGGGTGATGCAGCA  
ACGCCGCGTGAGGGATGAAGGCCTTCGGGTCGTAAACCTCTTTTCGACTGGGAAAAATGGG  
CTGGTGAAGAGCCAGTTATGATGGTACCGGTGGAAGAAGCACCGGCTAACTCTGTGCCAG  
CAGCCGCGGTAATACAGAGGGTGCGAGCGTTGTTCCGAATTATTGGGCGTAAAGGGCGCG  
TAGGCGGTGTTGTAAGTCACCTGTGAAACCTCTAGGCTTAACCTAGAGCCTGCAGGCGAA  
ACTGCAATGCTGGAGGGTGGGAGAGGTGCGTGGAATTCCTGGTGTAGCGGTGAAATGCGT  
AGATATCGGGAGGAACACCTGTGGCGAAAGCGGCGCACTGGACCACTACTGACGCTGAGG  
CGCGAAAGCCGGGGAGCAAACAGGATTAGATACCCCCGTAGTCC

>Otu4938

CCAGCCTATGGGTGGCTCCAGTAGGGAATATTGGTAATGGGCGAAAGCCTGAACCAGCAA  
CGCCGCGTGAGTGATGAAGGCCTTCGGGTTGTAAACTCTTTTTATGGGGACGAGGAAGG  
ACGGTACCCATAGAATAAGCTTCGGCTAACTACGTGCCAGCAGCCGCGGTAAACCGTAGG  
AAGCGAGCGTTATCCGGATTTACTGGGCGTAAAGCGCGTGACAGGCGGTTTGGTAAGTTGG  
ATGTGAAAGCTCCCGGCTTAACTGGGAGAGGTGCTTCAATACTGCCAGACTAGAGGATGG  
TAGAGGGAGGTGGAATTCCTGGGTGTAGTGGTGAAATGCGTAGATATCCAGAGGAACACCA  
GTGGCGAAAGCGGCCTCCTGGACCATTTCTGACGCTCATACGCGAAAGCTAGGGTAGCAA  
ACGGGATTAGAGACCCGCGTAGTCC

>Otu4939

CCAGCCTATGGGTGGCAGCAGGCGCGAAACCTTTACAATGCGCGAAAGCGTGATAGGGGG  
ATCCTGAGTGCTTACGGTTTATCTGTAAGCTTTTGCCAAGAGTTCACATCTTGAGAGAATA  
AGTGGTGGGTAAGACCGGTGCCAGCAGCCGCGGTAACCCCGGCGCCACGAGTGGCAATCT  
TATATTGGGCCTAAAGCATTTCGTAGCAGGTCTGAAAAATCTTTTGTGAAATTGTGCAACT  
CAATACGACAGCGTGACAGGAGACACTTTCAGACTAGAGACTGGGAGGAGTTGGGGGTATG  
TCTAGGGGAGCGGTTAAATGTGATAATCCTAGACAGACCACCTGTGGCGAAGGCGCCCAA  
CTAGAACAGTTCTGACTGTGAGGGATGAAAGCTGGGGGAGCAAACCGGATTAGATACCCG  
CGTAGTCC

>Otu4943

CCAGCCTACGGGGTGACACCAGTGGGGAATTTTGGACAATGGGCGAAAGCCTGATCCAGCA  
ACGCCGCGTGAAGGATGAAGGTCTTCGGATTGTAAACTTCTTTTAGAGGGAACGAATAAA  
TTGACGGTACTCTCAGAAAAAGCCACGGCTAACTACGTGCCAGCAGCCGCGGTAATACGT  
AGGTGGCAAGCGTTACTCGGATTTACTAGGCGTAAAGCGTGTGTAGGTGGTTGGATAAGT  
CTGTGGTGAAATTTCCCGGCCCACTGGGAAGGGTCCATAGAACTATTTCGGCTTGAGTG  
TGGTAGGGGAAGACGGAATTCCTGGTGTAGCGGTGAAATGCGTAGATATCGGGAGGAACA  
CCAATGGCGAAAGCAGTCAACTGGGCCAATACTGACACTGAGGAGCGAAAGCTAGGGGAG  
CAAACAGGATTAGAAACCCGGGTAGTCC

>Otu4944

GGACTACGGGGGTATCTAATCCTGTTTGCTACCCACGCTTTCGTGTCTCAGCGTCAACAA  
TGGTCCAGAAAGCCGTCTACACCGCAGGTGTTCTCTCTGATATCTACGCATTTACCCGT  
ACACCAGGAATTCGCTTTCTCTCCACGTTTCGAGCACCCAGTTTCCGGCGCACCCCTC  
CCAGTTGAGCCGGGAGATTTACACCGAACTTAAGGCACCGCCTACACACTCCTTACGCC  
CAGTAATTCGGAACAACGCTCGCTGCCTACGTATTACCGCGGCTGCTGGCACGTAGTTAG  
CCGCAGCTTCTTCTTCAGGTACCGTCATTATCTTCCCTGCCGACAGAGCTTTACACCCCG  
AAGGGCTTCATCGCTCACGCGGCGTGCCTGCATCAGGGTTTCCCCCATTTGTGCAAGATTC



CCCACTGCTGCCTCCCGTAGGCTGG

>Otu4947

CCAGCCTACGGGGCGCTCCAGTGGGGAATCTTGCGCAATGGGCGAAAGCCTGACGCAGCG  
ACGCCGCGTGGGTGATGAAGGCCTTCGGGTGTAAAGCCCTGTCAGGGGGAAAGAATGGA  
GTGCCAGTATAAATACGCTGGTGTCTGACGGTACCCCAAAGGAAGCACCGGCTAACTCTG  
TGCCAGCAGCCGCGGTAAGACAGAGGGTGCAAGCGTTGTTTCGGAATTACTGGGCGTAAAG  
GGCGCGTAGGCGGTTGGGAAAAGTTGGATGTGAAATCCCTCGTTTCAAGCAAGGAAGTGA  
TCCAAAACCTACCCAGCTCGAGTCCCGGAGAGGAAAGTGGAATTCCCGGTGTAAAGGTGAA  
ATTCGTAGAGATCGGGAGGAACACCAGAGGCGAAAGCGGCTTTCTGGACGGTGAAGTACG  
CTGAGGCGCGAAAGCGTGGGGAGCAAACAGGATTAGAAACCCTAGTAGTCC

>Otu4952

CCAGCCTATGGGACGCTCCAGTGGGGAATATTGGACAATGGGCGCAAGCCTGATCCAGCC  
ATGCCGCGTGAGTGAAGAAGGCCTTAGGGTTGTAAAGCTCTGTCAGAGGGAAAGAAGTGT  
AGGAGGGTTAATACCTCTTTTATTTGACGGTACCCTCAAAGGAAGCACCGGCTAACTCCG  
TGCCAGCAGCCGCGGTAATACGGAGGGTGCGAGCGTTGTTTCGGAATTATTGGGTGTAAAG  
CGCGTGTAGGCGGTTTTTTTAAAGTCTGATGTGAAAGCCCTGGGCTCAACCCGGGAAGTGCA  
TTGGAAACTGGGAGACTTGAATACGGGAGAGGGTAGTGGAATTCCTGGTGTAGGAGTGAA  
ATCCGTAGATATCAGGAGGAACACCGGTGACGAAGGCGGCTGCCTGGACCGATATTGACG  
CTGAGACGCGAAAGCGTGGGTAGCAAACCGGATTAGAAACCCGAGTAGTCC

>Otu4956

CCAGCCTATGGGAGGCAGCAGTCGAGGATCATTCGCAATGAGCGAAAGCTTGACGATGCG  
ACGCTGTGTGAACGATGAAGGCCTTCGGGTGCTAAAGTTCTTTCGCTTGGGAAACAAGAGA  
TTGCGGTGAATAACCGTGAAATTTGAGGGTACCAGGTAAAGAAGCACCGGCTAACTCCGT  
GCCAGCAGCTGCGGTAATACGGAGGGTGCAAGCATTAATCGGATTTATTGGGCGTAAAGG  
GCGCGTAGGCGGTTATGTAAGTCAGATGTGAAATACCGAAGCTCAACCTCGGTGCTGCAT  
TTGAAACTACAAGACTAGAGGGATGGCGGAGAAAACGGAATTCACGTGTAGCGGTGAAA  
TGCGTAGATATGTGGAAGAACACCTGTGGCGAAAGCGGTTTTCTAGCTGTTACCTGACGC  
TGAGGCGCGAGAGCAAGGGGAGCAAACAGGATTAGATACCCAGTAGTCC

>Otu4957

CCAGCCTACGGGTGGCAGCAGTTGGGAATCTTGCGCAATGGGGGCAACCCTGACGCAGCG  
ACGCCGCGTGCGGGATGACGGTCTTCGGATTGTAAACCGCTTTTCTCGGGGACGATAATG  
ACGGTACCCGAGGAATCAGCCCCGGCTAACTCCGTGCCAGCAGCCGCGGTAAGACGGAGG  
GGGCAAGCGTTGTCCGGAATTACTGGGCGTAAAGCGCTCGTAGGCGGTCTTTACGGCGG  
TGGTGAAAGCTCCTGGCTTAACTGGGAGAGGCCACCGCAACGGGAGGACTTGAGGGTGG  
TAGAGGCAGATGGAATTCCTGGTGTAGCGGTGAAATGCGTAGAGATCAGGAGGAACACCT  
ATGGCGAAGGCAGTCTGCTGGGCCACTCCTGACGCTGAGGAGCGAAAGCTAGGGGAGCAA  
ACGGGATTAGAGACCCCTGTAGTCC

>Otu4961

CCAGCCTATGGGTGGCACCAGTCGAGAATTTTTTACAATGGGCGAAAGCCTGATGGAGCG  
ACGCCGCGTGGGGGATGAATGGCTTCGGCCCGTAAACCCCTGTCATTTCGGGATCAATGCG  
TACTACTTAATACGTATTACGTTGATAGTACCGGAAGAGGAAGGGACGGCTAACTCTGTG  
CCAGCAGCCGCGGTAATACAGAGGTCCCAAGCGTTGTTTCGGAATTTACTGGGCGTAAAGGG  
TGCGTAGGTGGTTCGGGTAAGTCTGACGTGAAATCTCCGAGCTTAACTCGGAAACTGCGTT  
GGATACTATTTCGGCTTGAGGGTTGGAGGGGGGACTGGAATTCCTCGGTGTAGCAGTGAAAT  
GCGTAGATATCGAGAGGAACACCAGTGGCGAAGGCGAGTCCCTGGACAACCTCTGACACT  
AAGGCACGAAAGCTAGGGGAGCAAACAGGATTAGAAACCCGAGTAGTCC

>Otu4967

CCAGCCTACGGGGCGCAGCAGTGGGGAATTTTGCGCAATGGAGGAAACTCTGACGCAGCG  
ACGCCGCGTGGGTGATGAAGGCCTTCGGGTGTAAAGCCCTGTCGGCAGGGAAGAAAAGT  
GCATTGGCTAATATCCAATGCGCCTTTGACGGTACCTGCAAAGGAAGCACCGGCTAACTC  
CGTGCCAGCAGCCGCGGTAAGACGGAGGGTGCAAGCGTTGTTTCGGAATTGACTGGGCGTAA  
AGGGCGTGTAGGCGGTTTCGTTAAGTCGGGTGTGAAAGCCCGGGGCTCAGCTCCGGAAGTG  
CGCCCGAAACTGGCGAGCTGGAGCGCGGTAGAGGAGGGTGGAATTCCTGGTGTAGCGGTG  
AAATGCGTAGATATCAGGAGGAACACCGGCGGCGAAGGCGGCCCTCTGGACCGTTGCTGA  
CGCTGAGACGCGAAAGCGTGGGGAGCAAACAGGATTAGATACCCCGTAGTCC

>Otu4970

CCAGCCTATGGGTGCGCTGCAGTCGAGAATTTTTTACAATGGGCGAAAGCCTGATGGAGCG  
ACGCCGCGATGGGGGATGAATGGCTTCGGCCCGTGAACCCCTGTCATTTCGGGATCAATGTC

CCGACAATAACATTGTCTGGGATTGATAGTACCGGAAGAGGAAGGGACGGCTAACTCTGTG  
CCAGCAGCCGCGGTAATACAGAGGTCCCAAGCGTTGTTTCGGATTTACTGGGCGTAAAGGG  
TGCGTAGGTGGTTGGATAAGTCTGATGTGAAATCTCGGAGCTTAACTCCGAAACTGCATT  
GGATACTATCTAGCTTGAGAGTTGGAGGGGGGACTGGAATTCTCGGTGTAGCAGTGAAAT  
GCGTAGATATCGAGAGGAACACCAGTGGCGAAGGCGAGTCCCTGGACAACCTCTGACACT  
GAGGCACGAAAGCCAGGGGAGCAAACGGGATTAGATACCCGTGTAGTCC

>Otu4975

CCAGCCTACGGGGGGCACCAGTGAGGAATATTGGTCAATGGACGCAAGTCTGAACCAGCC  
ATGCCGCGTGAAGGATGAAGGCCTTCTGGGTTGTAACTTCTTTTACCTGGGAAGAAACC  
TCTGATTTCTATTAGAGTTGACGGTACCAGAGGAATAAGCACCGGCTAACTCCGTGCCAG  
CAGCCGCGGTAATACGGAGGGTGCAAGCGTTATCCGGATTTATTGGGTTTAAAGGGTGCG  
TAGGCGGACTTATAAGTCAGTGGTGAAATCTCATCGCTTAACGATGAACGTGCCATTGAT  
ACTGTAGGTCTTGAGTACAGATGCCGTTGGCGGAATGTGTCATGTAGCGGTGAAATGCAT  
AGATATGACACAGAACACCGATTGCGAAGGCAGCTGACGAACTGTAAGTACGCTGAGG  
CACGAAAGCGTGGGGATCAAACAGGATTAGAGACCCGAGTAGTCC

>Otu4978

CCAGCCTACGGGTTCGAGCAGTGGGGAATTTTAGACAATGGGCGAAAGCCTGATCTAGTA  
ATATTTTCGTGGATGATGAAGGCCTCAGCTGTAAATTTCTGTTTTTCGATAATGACAATAAT  
GATTACAATTATAAAGAAGCCCCGGTAAATGTCTGTGCCAGCAGCCGCGGTAATACAGG  
GGGGGCTAGTATTATTCTGCATGATTGGGCGTAAAGGATATCTAGGTGGTTTTTTTTAATA  
TTAAAAGAAAGACTATATTAAATGTATAGTAGGTTTTAGTATATTTTTAAACCTTTGAGTT  
TATAAAGATAATAGAATGCTCAGAGTAACAGTGAAATGTATTGAAGCTGGGCGGAATTC  
CAAATGGCGAAAGCAGTTATCTTGTTAAACTGACACTAAAGTATGAAGGTATGGGGAGC  
GAATAGGATTAGATACCCCCGTAGTCC

>Otu4981

CCAGCCTATGGGTCGCTGCAGTGGGGAATCTTGACAATGGGGGAAACCCTGATGCAGCG  
ACGCCGCGTGAGCGATGAAGCCCTTCGGGGTGTAAGCTCTTTCGACGGGAACGATAATG  
ACGGTACCCGGAAGAAGCTGCGGCTAACTACGTGCCAGCAGCCGCGGTAATACGTAGG  
CAGCAAGCGTTGTTTCGGAGTTACTGGGCGTAAAGAGTGCGTAGGCGGTGCCCTAAGTCTG  
TTGTGAAATCTCCCGGCTTAACTGGGAGGGTGCGGTGGAACTGGGGTGCTTGAGTGTGG  
GAGAGGTAAGCGGAATTCCTGGTGTAGCGGTGAAATGCGTAGATATCAGGAGGAACGCCG  
GTGGTGAAAGCGGCGAGCTGGATCACTACTGACGCTGAGGAACGAAAGCTAGGGGAGCAA  
ACAGGATTAGAAACCCTTGTAGTCC

>Otu4987

CCAGCCTATGGGGGGCTGCAGTGGGGAATCTTGACAATGGGGGAAACCCTGATGCAGCG  
ACGCCGCGTGAGCGATGAAGCCCTTCGGGGTGTAAGCTCTTTCGGTGGGGACGATTATG  
ACGGTACCCGCGAGAAGCAGCTGCGGCTAACTACGTGCCAGCAGCCGCGGTAATACGTAGG  
CAGCGAGCGTTGTTTCGGAGTTACTGGGCGTAAAGGGTGTGTAGGCGGTCCCCTAAGTTCG  
GTGTGAAATCTCCCGGCTCAACTGGGAGGGTGCGCCGAAGACTGGAGGGCTTGAGTGC  
GGATGGGAGAGTGGAATTCCTGGTGTAGCGGTGAAATGCGTAGATATCAGGAGGAACACC  
GGTGGTGTAGACGGCTTTCTGGACCGTAACTGACGCTGAGACACGAAAGCGTGGGTAGCA  
AACAGGATTAGAAACCCGTGTAGTCC

>Otu4988

CCAGCCTATGGGTGGCAGCAGTCGAGGATCTTCGGCAATGGGCGAAAGCCTGACCGAGCG  
ACGCCGCGTGCGGGATGAAGGCCTTCGGGTGTAAACCGCTTTCGTAGGGGAGGAAATTC  
CGGTGGGATCACCCATCGGTTTGACCTAGCCTAGGAAGAAGGACGGGCTAAGTTTCGTGCC  
AGCAGCCGCGGTAATACGAACCGTCCAAACGTTATTTCGGAATCACTGGGCTTAAAGGGTG  
CGTAGGCGGCCCCGGAAGTTGGGTGTGAAATCCCTCGGCTCAACCGAGGAATTGCGCCCA  
AACTGCCGGGCTTGAGGGAGATAGAGGTGAGTGGAACCTTAGGGTGGAGCGGTGAAATGC  
GTTGATATCCTAAGGAACACCGGTGGCGAAAGCGACTCACTGGGTCTCTTCTGACGCTGA  
GGCACGAAAGCTAGGGTAGCGAAGAGGATTAGAAACCCCTCGTAGTCC

>Otu4990

CCAGCCTACGGGGTGACACCAGTGGGGAATATTGGACAATGGGGGAAACCCTGATCCAGCA  
ATGCCGCGTGTGTGAAGAAGGCCTTCGGGTGTAAAGCACTTTTGTGAGGAGGAACGTT  
GGTAGGTTAAGAGCTAACCAACTTGACTGTACTCAAAGAATAAGCACCGGCTAACTCTGT  
GCCAGCAGCCGCGGTAATACAGAGGGTGCGAGCGTTAATCGGAATTACTGGGCGTAAAGG  
GTGCGTAGGTGGAAAGATAAGTCGAACGTGAAAAGCCTGGGCTTAACCTAGGTTCGTGCGT  
GCGATACTGTTTTTCTAGAGTATGGCAGAGGAGAGTGGAATTTTCAGGTGTAGCGGTGAAA

TGCGTAGATATCTGAAGGAACACCAGTGGCGAAGGCGACTCTCTGGGCTAATACTGACAC  
TGAGGCACGAAAGCCAGGGGAGCAAACGGGATTAGATACCCCTGTAGTCC  
>Otu4998  
CCAGCCTATGGGGGGCTCCAGTCGAGAATATTCCACAATGGGCGAAAGCCTGATGGAGCG  
ACGCCGCGTGAGGATGAAGGTTTTAGGATCGTAAACTGCTTTTCTATGGGAGGAAGGTC  
ACTTCGGTGATTTGACAGTACCGTAGGAATAAGGGGTTGCAAACCTACGTGCCAGCAGCCG  
CGGTAATACGTAGACCCCGAGCGTTATCCGGATTTATTGGGCGTAAAGAGTGTGTAGGGG  
GCTAGGTGCGTCTCTTGTTAAATCTTGCAGCTTAACTGTGAGGCCGCAAGAGATACGACC  
TAGCTAGAGAATACGAGAGGTTAGCGGAACGAACGGTGTAGGGGTGAAATCCGTTGATAT  
CGTTCGGAACACCAAAAGCGAAGGCAGCTAACTGGCGTATTTCTGACCCTGAGACACGAA  
AGCGTGGGGAGCAAAAAGGATTAGATACCCCTCGTAGTCC  
>Otu5000  
CCAGCCTATGGGTTGCTGCAGTAGGGAATTTTGCGCAATGGACGAAAGTCTGACGCAGCA  
ACGCCGCGTGAGTGATGAAGGTCTTCGGATTGTAAAGCTCTGTTGAGTGGGAAGAAAAGT  
TTCAAGAATAATACCTTGAAATCTGACGGTACTACTTGAGGAAGCCCCGGCTAACTACGT  
GCCAGCAGCCGCGTAATACGTAGGGGGCAAGCGTTGTTCCGAATCACTGGGCGTAAAGG  
GAGCGTAGGCGGAGAGGTAAGTTAGGAGTATAATATATGGGCTTAACCCGTAGTCTGCTT  
CTAATACTGCTTTTCTTGAGTATGGGAGAGGGAGATGGAATTCAGGTGTAGCGGTGAA  
TGCGTAGATATCTGGAAGAACACCAGCTGCGAAGGCGGTCTCCTGGCCCAATACTGACGC  
TGAGGCTCGAAAGCTAGGGGAGCAAACAGGATTAGAAACCCCTGGTAGTCC  
>Otu5002  
CCAGCCTACGGGTGGCAGCAGTTTGAATATTCCACAATGGGCGAAAGCCTGATGGAGCG  
ACACCGCGTGAGGACGAAGGTCTTCGGATTGTAAACTCCTTTAGACCCGGATGAAGATT  
CCAGGGTGAATAATCCTGGAATTTGACCGTACGGGTAAAATAAGCCACGGCTAACTCTGT  
GCCAGCAGCCGCGTAATACAGAGGTGGCAAACGTTGTCCGGAATTACTGGGTGTAAAGG  
GTCCGCAGGCGGCCCTTGTAAGTTGAAGGTGAAATGTCCCGGCTCAACCGGGTCACTGCCT  
TCAAACTGCAGGGCTTGAGTACGGTAGAGGAGAGTGGAAATCCCAGTGTAGCGGTGAAA  
TGCGTAGATATTGGGAGGAACACCAGTGGCGAAGGCGGTCTCTGGACCGATACTGACGC  
TCAGGGACGAAAGCCAGGGGAGCAAACGGGATTAGATACCCCTGGTAGTCC  
>Otu5008  
CCAGCCTATGGGTTGCTGCAGTCGAGAATCATTCGCAATGGGCGCAAGCCTGACGATGCG  
ACGCCGTGTGAGCGATGAAGGCCTTAGGGTCGTAAAGCTCTTTCGCCTGGGAACAAGAGA  
AGCTGACAAATAATCAGCCGATTTGAGGGTACCAGGTAAAGAAGCACCGGCTAACTCCGT  
GCCAGCAGCTGCGGTAATACGGAGGGTGCAAGCATTAATCGGATTTATTGGGCGTAAAGG  
GCGCGTAGGCGGAAAAGCAAGTCAGATGTGAAATCCCGGGGCTCACCCCGGAACAGCAT  
TTGAACTGCATTCCTTGAGGGTAGGCGGAGAAAATGGAATTCACAAGTAGCGGTGAAA  
TGCGTAGATATGTGGAAGAACACCAGTGGCGAAGGCGATTTTCTAGCTTATACCTGACGC  
TGAGGCGCGAAAGCAAGGGGATCAAACAGGATTAGAGACCCAGTAGTCC  
>Otu5011  
CCAGCCTACGGGGGGCTGCAGTGGGGAATTTTGCGCAATGGGGGAAGCCCTGACGCAGCA  
ATGCCGCGTGAGTGATGAAGGCCTTCGGGTCGTAAAGCTCTGTGAGAGGGAAGAAGTGT  
AGGAGGGTTAATACCCCTTTTATTTGACGGTACCCTCAAAGGAAGCACCGGCTAACTCCG  
TGCCAGCAGCCGCGGTAATACGGAGGGTGCGAGCGTTGTTCCGAATTATTGGGCGTAAAG  
CGCGTGTAGGCGGGTATTTAAGTCAGGGGTGAAATGCCAAGGCTCAACCTTGGAAGTACC  
TTTGATACTGGATATCTTGAGTCCGGGAGAGGTGAGTGGAACTGCGAGTGTAGAGGTGAA  
ATTCGTAGATATTCGCAAGAACACCAGTGGCGAAGGCGGTCACTGGCCCGGTACTGACG  
CTGAGGTGCGAAAGCGTGGGGAGCAAACAGGATTAGAAACCCAGTAGTCC  
>Otu5014  
GGACTACGGGGGTATCTAATCCTGTTTGATCCCCACGCTTTCGAGCCTCAGCGTCAGTTA  
CAGTTTTGTGAGCTGCCTTCGCAATCGGTGTTCTGTGTATATCTAAGCATTTACCCGT  
ACATGACACATTCCGCCAACATCATCTGTACTCAAGTTCTACAGTATCAATGGCACGTTT  
GTTGTTAAGCAACGAGATTTCAACCTGACTTATAAAACCGCCTACGCTCCCTTTAAACC  
CAATAAATCCGGATAACGCTTGCATCCTTCGTATTACCGCGGCTGCTGGCACGAAGTTAG  
CCGATGCTTATTCTTACGGTACTATCAGCCTCGCTCACGAGCGAGGGTTTTCTCCCGTAC  
AAAAGCAGTTTACAACGCGTAGCGCCTTCTTCCTGCACGCGGGATGGCTGGTTCAGGCTT  
GCGCCCATTTGACCAATATTCTCTCACTGCAGCGACCCGTAGGCTGG  
>Otu5015  
CCAGCCTATGGATGCAGCAGTGGGGAATATTGGGCAATGGGCGAAAGCCTGACCCAGCCA

CGCCGCGTGAGTGATGAAGGCCTTCGGGTCGTAAAGCTCTGTGGGGGGGACGAACAAGC  
AGGCACTAAATACGTGCAGGCCCTGACGGTACCTCCTTAGCAAGCACCGGCTAACCATGT  
GCCAGCAGCCGCGGTAATACATGGGGTGCAAACGTTGCTCGGAATTATTGGGCGTAAAGC  
GCGCGTAGGCGGTCGCTTAAGTCGGATGTGAAATCCCTTGGCTTAAGTGAAGTGCAT  
CCGAGACTGAGCAGCTAGAGTACGAAAGAGGGTCGCGGAATTCCTGGTGTAGAGGTGAAA  
TTCGTAGATATCGGGAGGAACACCAGTGGCGAAGGCGGTTTCCTGGCCTGATACTGACGC  
TGAGGCGCGAAAGCGTGGGGAGCAAACAGGATTAGAAACCCAGTAGTCC

>Otu5016

CCAGCCTACGGGGCGCACCAAGTGGGGAATTTTTCGCAATGGGAGCAATCCTGACGCAGCG  
ACGCCGCGTGGAATGATGAAGGCCTTCGGGTTGTAAAGTCTAGTAAGCAGGGAAGAATAAG  
CGTGGGGTAATATTCATGTGATGACGGTACCTGCCTAAAGCCCCGGCTAGCTACGTGCC  
AGCAGCCGCGGTAATACGTATGGGGCGAGCGTTGTTTCGGAATTATTGGGCGTAAAGGGCG  
CCTAGGCGGGGACTAAGTTAGGTGTGAAAGCCATGGGCTCAACCCATGAACTGCATCTA  
AGACTGGTTCTCTTGAGTTCGGGAGAGGAGAGCGGAATTCAGGTGTAGCGGTGAAATGC  
GTAGATATCTGGAAGAACACCAGTGGCGAAGGCGGCTCTCTGGCCTAGAACTGACGCTGA  
AGCGCGAAAGCGTGGGGAGCGAACAGGATTAGATACCCTGGTAGTCC

>Otu5020

CCAGCCTACGGGTCGCAGCAGTCGAGAATTTTTCACAATGGGAGAAATCCTGACGGAGCG  
ACGCCGCGTGGAAGATGAAGGCCGAAAGGTTGTAAATTCCTTTTATACGGGAAGAATAAG  
TGTATTGAGAGAAACGGTGCATGATGACGGTACCGTATGAATAAGCCCCGGCTAACTACG  
TGCCAGCAGCCGCGGTAATACGTAGGGGGCAAGCGTTGTTTCGGAATTCATTGGGCGTAAAG  
GGCATGTAGGCTGTTATGTAAGTGTGGATTTAAAGGCGGAGGCTTAACCTCTAGTTTGGT  
CTGCAAACCTGCGTAGCTTGAGTGTAGAAGGGGAACTGGAATTCGCGGTGTAGGGGTGAA  
ATCTGTAGAGATCAGGAAGAATACCAGTGGTGAAGGCGAGCTCCTGGCCAATGATTGACG  
CTGAGGTGCGAAAGTGTGGGGATCAAACAGGATTAGAGACCCCGTAGTCC

>Otu5021

CCAGCCTATGGGAGGCAGCAGGAGGGAATTTTTCGCAATGGGAGAAAGTCTGACGCAGCA  
ACGCCGCGTGAGTGATGACGGTCTTCGGATTGTAAAGCTCTGTTGAGTGGGAAGAAAAGT  
TTCGGTAATAATACTGCCGGAGCCTGACGGTACCGCTCGAGGAAGCCCCGGCTAACTACG  
TGCCAGCAGCCGCGGTAATACGTAGGGGGCGAGCGTTGTTTCGGAATCACTGGGCGTAAAG  
GGAGCGTAGGCGGGATCGTAAGTTAGGAGTCTAATTCTCAGGCTTAACCTGAGGCCGGCT  
CTTAATACTGCGGTTCTTGAGTAAGGAAGAGGGAGATGGAATTTTCAGGTGTAGCGGTGGA  
ATGCGTAGATATCTGAAAGAACACCAGCAGCGAAGGCGGTCTCCTGGTCTATACTGACG  
CTGAGGCTCGAAAGTTAGGGGAGCAAACAGGATTAGAAACCCGAGTAGTCC

>Otu5022

CCAGCCTACGGGGGGCAGCAGTGAGGAATATTGCGCAATGGGCGAAAGCCTGACGCAGCA  
ACGCCGCGTAGGGGACGAAGGCCTTCGGGTCGTAAACCTCTTTTCTGGGGGACGAGCAAG  
GACGGTACCTCAGGAATAAGTCTCGGCTAACTACGTGCCAGCAGCCGCGGTAACACGTAG  
GAGGCGAGCGTTATCCGGATTACTGGGCGTAAAGCGCACGCAGGCGGCTCAGCAAGTTG  
GATGTGAAAGCTTCTGGCTTAAGTGGGAGAGGTCATTCGAAACTGCTGGGCTTGAGGTTG  
GGAGAGGGGTGTGGAATTCCCGGTGTAGCGGTGGAATGCGTAGATATCGGGAGGAACACC  
TGTGGCGAAAGCGACACCCTGGCCACACCTGACGCTGATGTGCGAAAGCGTGGGGAGCA  
AACAGGATTAGAAACCTTGTAGTCC

>Otu5025

CCAGCCTACGGGGGGCAGCAGTGAGGAGTATTGCTCAATGGGCGCAAGCCTGAAGCAGCG  
ACGCCGCGTGAGGGATGAAATCCGTTAGGATGTAAACCTCTTTTCTGGGGAAGAATGTT  
CCAATTTATTGGAATTGACGGTACTCTGCGAATAAGCACCGGCAAACTACGTGCCAGCAG  
CCGCGGTAATACGTAGGGTGCGAGCGTTGTCCGGAATTACTGGGTGTAAAGGGTTTCGAG  
GCGGACAAGATAGTCAGTGGTGAATTTCTCCGGCTCAACCGGAGACGTGCTGTTGATACT  
TCTTGTCTTGAGGTCGAGAAAGGATAATGGAATTCATGGTGTAGCGGTGAAATGCGTAGA  
GATCATGAAGAACACCGGTAGCGAAGGCGGTTATCTGGCTCAAACTGACGCTCAGGGAC  
GAAAGCGTGGGTAGCAAACAGGATTAGAGACCCTAGTAGTCC

>Otu5026

CCAGCCTACGGGGGGCAGCAGTGGGGAATATTGCACAATGGGCGAAAGCCTGATGGAGCG  
ACGCCGCGTGGGGGATGAATGGCTTCGGCCGTAACCCCTGTCATTTCGCGATCAAACCT  
TGCTATTTAAAGGATGGCAAGCTGATAGTACCGGAAGAGGAAGGGACGGCTAACTCTGTG  
CCAGCAGCCGCGGTAATACAGAGGTCCCAAGCGTTGTTTCGGAATCACTGGGCGTAAAGGG  
TGCGTAGGTGGTTGGGTAAGTCTGATGTGAAATCTCGGAGCTTAAGTCCGAAACTGCATT

GGATACTATCTAGCTTGAGAGTTGGAGGGGGGACTGGAATTCTCGGTGTAGCAGTGAAT  
CGCTAGATATCGAGAGGAACACCAGTGGCGAAGGCGAGTCCCTGGACAACTTCTGACACT  
GAGGCACGAAAGCCAGGGGAGCAAACGGGATTAGATACCCTAGTAGTCC

>Otu5030

CCAGCCTACGGGATGCTCCAGTAGGGAATATTGGTAATCTGCGAAAGCGGGAACCAGCAA  
CGCCGCGTGTGCGATGAAGGCCTTCGGGTCTGTAAAGCACTTTTTGAGGAGACGAGGAAGG  
ACGGTATCCTCAGAATAAGTCTCGGCTAACTACGTGCCAGCAGCCGCGGTAACACGTAGG  
AGACGAGCGTTGTCCGGATTTATTGGGCGTAAAGCGCACGCAGGCGGTCTGTATCAGTCCA  
GGGTGACAGTTTCCGGCTTAACCGGAAAAGGACTCTGGAGACGGCACGACTTGAGGGCTT  
CAGAGGGATGTGGAATTCCAGGTGGAGTGGTGAAATGCGTAGAGATCTGGAAGAACACCA  
AAGGCGAAGGCAACATCCTGGGGAGTCACTGACGCTCGGGTGCGAAAGCTAGGGGAGCGA  
ACGGGATTAGAAACCCCAGTAGTCC

>Otu5033

CCAGCCTACGGGTGGCTGCAGTAACGAATCTTCCGCAATGCACGCAAGTGTGACGGAGCG  
ACGCCGCGTGTGGGACGAAGTCCTTCGGGATGTAAACCACTGTCAGGGGTAAAGAAAGTTC  
TGATCTACCCAGAGGAAGGCACGGCTAACTCTGTGCCAGCAGCCGCGGTAAGACAGAGG  
TGCCGAGCGTTAGGCGGAATCACTGGGCTTAAAGCGTGTGTAGGCGGGTCTGTTAAGTACC  
TTGTGAAATCCCATGGCTCAACCATGGAACGGCTGGGTATACTGGCGATCTTGAGCGGCC  
TAGGGGCAGATGGAACAAGTGGTGGAGCGGTGAAATGCGTAGATATCACTTGAACGCCA  
AAGGTGAAAACAGTCTGCTGGGGGCTGCTGACGCTGAGACACGAAAGCCAGGGGAGCGA  
ACGGGATTAGAAACCCGAGTAGTCC

>Otu5034

CCAGCCTATGGGTGGCAGCAGTGGGGAATATTGGACAATGGGCGCAAGCCTGATCCAGCC  
ATGCCGCGTGAGTGATGAAGGCCCTAGGGTTGTAAAGCTCTTTCGGCGGGGACGATGATG  
ACGGTACCCGCAGAAGAAGCCCCGGCTAACTTCGTGCCAGCAGCCGCGGTAATACGAAGG  
GGGCTAGCGTTGTTCCGAATTACTGGGCGTAAAGCGCACGCAGGCGGTCCGCATAGTCAG  
GAGTGAAAGCCCTGGGCTCAACCCGGGAATTGCTTTTGATACTGGCGGACTAGACTCATG  
GAGAGGGTAGCGGAATTCCGAGTGTAGAGGTGAAATTCGTAGATATTCGGAAGAACACCA  
GTGGCGAAGGCGGCTACCTGGCCATCGAGTGACGCTCATGTGCGAAAGCGTGGGGAGCAA  
ACAGGATTAGAAACCCGAGTAGTCC

>Otu5036

CCAGCCTACGGGTGGCAGCAGTAGGGAATATTGTGCAATGGGGGAAACCCTGACACAGCG  
ACGCCGCGTGTGGGATGAAGGCCTTCGGGTGTAAACCACTGTCAGAGGGGACGAATTTA  
TCGTTTAATAAACGGTATTGACTTAACCCCTCAGAGGAAGCAACCGCTAACTCCGTGCCAG  
CAGCGGCGGTAATACGGAGGTGCAAACGTTGTTCCGATTTACTGGGCGTAAAGAGTTTCG  
TAGGCGGTCTGGGATTAATTAGACGTGAAAGCCTCCGGCTTACCCGGAGAATGGCATCTAA  
TATTGCCCGACTTGAGTGTGAAAGAGGAAAGTGAATTTAGGTGGAGCGGTGAAATGCG  
TAGATATCTACAGGAACACCGGATGCGAAGGCGACTTTCTAGTTCGCAACTGACGCTGAG  
GAACGAAAGCTAGGGGATCAAACAGGATTAGATACCCTAGTAGTCC

>Otu5044

CCAGCCTACGGGTGGCTGCAGTCGAGAATCTTCGGCAATGGGCGCAAGCCTGACCGAGCG  
ACGCCGCGTGGAGGATGAAGGCCTTCGGGTGTAAACTCCTGTGAGGGGGGAACAAGGGG  
CCGTGCAGAGCGGTCCTTGAGTGGTCCCTGGAGGAAGCACGGGCTAAGTTCGTGCCAGCA  
GCCGCGGTAAGACGAACCGTGCAACGTTATTTCGAATCACTGGGCTTAAAGCGCGTGTA  
GGCGGTCCGGCACGTTTCGTGCTGAAATCCCCCGGCTCAACCGGGGAACGGGCGCGGATA  
CGACCGGACTGGAGGGAGGTAGGGGGAGCCGGAACCTCCGGTGGAGCGGTGAAATGCGTT  
GAGATCGGAAGGAACGCCCGTGGCGAAAGCGGGCTCCTAGACCTTACCTGACGCTGAGAC  
GCGAAAGCCAGGGGAGCGAACGGGATTAGATACCCTGGTAGTCC

>Otu5045

CCAGCCTATGGGGGGCAGCAGTCGAGAATTTTTCTCAATGGGCGAAAGCCTGAAGGAGCG  
ACGCCGCGTGGGGGATGAATGGCTTCGGCCCGTAAACCCCTGTCATTTGCGAACAAACCT  
TTTCACCTAACACGTGAAGAGCTGATTGTAGCGGAAGAGGAAGAGACGGCTAACTCTGTG  
CCAGCAGCCGCGGTAATACAGGGGTCTCAAGCGTTGTTCCGATTCACTGAGCGTAAAGGG  
TGCGTAGGTGGAGGGGCAAGTCTGACGTGAAATCTCCGGGCCTAACCCGGAACGGCGTT  
GGAAACTGCCTTGCTCGAGGATTGGAGGGGAGACTGGAATACTTGGTGTAGCAGTGAAT  
GCGTAGATATCAAGTGGAACACCAGTGGCGAAGGCGAGTCTCTGGACAAATCCTGACACT  
GAGGCACGAAAGCCAGGGGAGCAAACGGGATTAGATACCCTCGTAGTCC

>Otu5046

CAGCCTATGGGACGCTGCAGGCGCGAAAACTTTACAATGCGGGAAACCGTGATAAGGAAA  
CCCCGAGTGCCAGCATAGGCTGGCTGTCCATCAGTGTAATAACTGGTGAAGAAGGGGCC  
GGGCAAGACCGGTGCCAGCCGCCGCGGTAATACCGGCGGCTCGAGTGGTGGCCGCTATTA  
TTGGGCTTAAAGGGTCCGTAGCTGGATTACAAGTCCCTTGAGAAATCCATCGGCTTAAC  
TGCTGGGCGTTTCAAGGGATACTGTGGTTCTAGGGACCGGGAGAGGTGAGAGGTACTGCCG  
GGGTAGGAGTGAAATCCTGTAATCCTTGGGGGACCACCTGTGGCGAAGGCGTCTCACCAG  
GACGGCTCCGACAGTGAGGAACGAAAGCTGGGGGAGCAAACCGGATTAGATACCCTGGTA  
GTCC

>Otu5057

CCAGCCTACGGGGGGCACCAGGCTAAGCATTTTTCTCACAGCGATAGCGATAGCTTCCGG  
GTTTTCTGGAGGAACGGTTTCTCCGCATCCGCTTTCCGCGACAATATCATTTTTCGGCATC  
GGTTGCGTGAAATTACAGGCTTTCCAGCAAGCATGTAATCGAAGACTTTATTTGGAGAAAC  
TCCAAATCTGTAAATATCCTTTTCGTTGCCAGCCGATGAAGCATGCATCAAAATGAGCGAT  
GATTGAGGGGACAAGCAACTTTGGAACAGCGGGGAGGAAGGAGACATTACTTAATGACAT  
CTCACGGGCCAATTGTTCCAATCGTTGTTTTTCCGGACCCTGTCCAACAAGAACAACACT  
AACATTGTCATCCCGTAAACGGTCTGCTGCCAGCAAGAGTGAATCAAGAGCATTAGATAC  
CCTAGTAGTCC

>Otu5061

CCAGCCTATAGGCTGCAGTGGGGAATTTTGCGCAATGGGGGAAACCCTGACGCAGCAACG  
CCGCGTGGAGGATGAAGGCCCTTGGGTGCTAAACTCCTTTCGACCGGGACGATTATGACG  
GTACCGGTGGAAGAAGCACC GGCTAACTCTGTGCCAGCAGCCGCGGTAATACAGAGGGTG  
CGAGCGTTGTTTCGGAATTATTGGGCGTAAAGGGCGCGTAGGCTGTGCGGTAAGTCACCTG  
TGAAATCCCCAGGCTTAACCTGGGGCCTGCAGGCGAAACTGCCGTGCTGGAGGGTGGGAG  
AGGTGCGTGGAATTCCCGGTGTAGCGGTGAAATGCGTAGATATCGGGAGGAACACCGGTG  
GTGTAGACGGCTTTCTGGACCGTAACTGACGCTGAAACACGAAAGCGTGGGTAGCAAACA  
GGATTAGAGACCCTCGTAGTCC

>Otu5064

CCAGCCTATGGGTTGCTGCAGTGGGGAATTTTGCGCAATGGGGGAAACCCTGATCCAGCA  
ATGCCGCGTGTGTGAAGAAGGTCTTCGGATTGTAAAGCACTTTTGGCAGGGACGATGATG  
ACGGTACCTGCAGAATAAGCCCCGGCTAACTTCGTGCCAGCAGCCGCGGTAATACGAAGG  
GGGCTAGCGTTGTTTCGGAATCACTGGGCGTAAAGCGTGCGTAGGCGGTTTTCGAAGTCAG  
GGTGAAATCCTGGGGCTCAACCCAGAATTGCCTTTGAAACTGGAAAGCTAGAGTACTG  
GAGGGGATAGCGGAATTCCTAATGTAGAGGTGAAATTCGTAGATATTAGGAGGAACACCG  
GTGGCGAAAGCGGCTATCTGGACAGTAACTGACGCTCTGGCACGAAAGTGTGGGGATCAA  
ACAGGATTAGAGACCCTAGTAGTCC

>Otu5065

CCAGCCTACGGGTGGCTCCAGTGGGGAATTTTGCGCAATGGGGGAAACCCTGACGCAGCA  
ACGCCGCGTGGAGGATGAAGTCCTTCGGGACGTAAACTCCTTTTCGATCGGGACGATTATG  
ACGGTACCGGAAGAAGAAGCCCCGGCTAACTTCGTGCCAGCAGCCGCGGTAATACGAGGG  
GGGCGAGCGTTGTTTCGGAATTAATTGGGCGTAAAGGGTGCGTAGGCGGCTTGGTAAGTCTT  
ATGTGAAATCTATGGGCTCAACTCATAGACTGCATGAGAAACTGCCGGGCTCGAGTGTGG  
GAGAGGTGAGTGGAATTTCCGGTGTAGCGGTGAAATGCGTAGATATCGGAAGGAACCTTCA  
GTGGCGAAGGCGGCTTCCTGGTCCAGCACCGACGTTTCAGGCACGAAAGCGTGGGGAGCAA  
ACAGGATTAGAAACCCCCGTAGTCC

>Otu5069

CCAGCCTACGGGGTGCAGCAGTAGGGAATTTTCCACAATGGGCGAAAGCCTGATGGAGCA  
ACGCCGCGTGCAGGATGAAGGCCCTCGGGTCGTAAACTGCTTTTATATGTGACGAATATG  
ACGGTAGCATATGAATAAGGATCGGCTAACTCCGTGCCAGCGGCCGCGGTCATACGGAGG  
ATCCAAGCGTTATCCGGAATTACTGGGCGTAAAGAGTTGCGTAGGTGGCATAGTAAGTAG  
ATAGTGAAAGCCTGGGGCTCAACCCCTTACACATTATCTAAACTGCTAAGCTAGAGGATG  
AGAGAGGTTATTGGAATTCTTAGTGTAGGAGTGAAATCCGTAGATATTAGGAGGAACACC  
GATGGCGTAGGCAGATAACTGGCTCATTCCTGACACTAAGGCACGAAAGCGTGGGGAGCAA  
AACAGGATTAGAGACCCTAGTAGTCC

>Otu5072

CCAGCCTATGGGGTGCACCAGTGGGGAATTTTGCGCAATGGACGCAAGTCTGAGCCAGCC  
ATGCCGCGTGGAGGATGAAGGTCCTCTGGATTGTAAACTTCTTTTATTTGGGAAGAAACC  
CACGATTTCTATTGTGGTTGACGGTACCAGATGAATAAGCACCGGCTAACTCCGTGCCAG  
CAGCCGCGGTAATACGGAGGGTGCAAGCGTTATCCGGATTCACTGGGTTTAAAGGGTGCG

TAGGCGGGCAGGTAAGTCAGTGGTGAATCTCCGGGCTTAACCCGAAAAGCTGCCGTTGAT  
ACTATTTGTCTTGAATGTTCGTGGAGGTGAGCGGAATATGTCATGTAGCGGTGAAATGCTT  
AGATATGACATAGAACACCCATTGCGAGGGCAGCTCACTACACGATGATTGACGCTGAGG  
CACGAAAGCGTGGGGATCAAACAGGATTAGAAACCCCCGTAGTCC

>Otu5073

CCAGCCTACGGGTGGCTGCAGTGGGGAATATTGGACAATGGGCGAAAGCCTGATCCAGCA  
ATGCCGCGTGAGTGACGAAGGCCTTAGGGTTGTAAACTCTTTTGTGAGGGAAGATAATG  
ACGGTACCTGCAGAAAAAGCTCCGGCTAACTCTGTGCCAGCAGCCGCGGTAATACAGAGG  
GAGCTAGCGTTGTTTCGAATTACTGGGCGTAAAGCGCGCGTAGGCCGCTTGCCAAGTCAG  
ATGTGAAATCCCGGGGCTTAACCTCCGGAATTGCATTTGAAACTGGCGAGCTAGAGAATGG  
TAGGGGATAGGGGAATTTCTAGTGTAGAGGTGAAATTCGTAGATATTAGAAGGAACACCA  
GTGGCGAAGGCGCCTATCTGGGCCATTTCTGACGCTGAGGCGCGAAAGCGTGGGGAGCAA  
ACAGGATTAGATACCCCAGTAGTCC

>Otu5074

CCAGCCTATGGGTGGCAGCAGTGGGGAATATTGGACAATGGGGGAAACCCTGATCCAGCA  
ATGCCGCGTGGGTGAAGAAGGCCTGCGGGTTGTAAAGCCCTTTTCGGTGAGGACAAAATGT  
GTCGCATTAATACTGCGATGTTTTGATTTAACTCATTAAAGAAGCACCGGCTAACTCTGT  
GCCAGCAGCCGCGTAATACAGAGGGTGCAGCGTTAATCGGAATTACTGGGCGTAAAGC  
GCACGTAGGCGGTTAGGTAAGTTGGATGTGAAATCCCGGGCTTAACCTGGAATTGCAT  
TCAAGACTGCCTGACTCGAGTGTGGGAGAGGGAAGCGGAATTCAGGTGTAGCGGTGAAA  
TGCGTAGATATCTGGAGGAACATCAGTGGCGAAGGCGGCTTTCTGGCCCAACACTGACGC  
TGAGGTGCGAAAGCGTGGGGAGCAAACAGGATTAGATACCCCTAGTAGTCC

>Otu5078

CCAGCCTATGGGGTGCAGCAGTGGGGAATTGTTTCGCAATGGGCGCAAGCCTGACGACGCA  
ACGCCGCGTGGAGGATGAAGACCTTCGGGTCGTAAACTCCTTTTCGATCGAGACGAATGGC  
CTCCGGGTGAACAATCCGGAGGAGTGACGGTACCGAGAGAAGAAGCCCCGGCTAACTCCG  
TGCCAGCAGCCGCGGTAATACGGGGGGGGCAAGCGTTGTTTCGGAATTACTGGGCGTAAAG  
GGCTCGTAGGCGGCCAACTAAGTCAGACGTGAAATCCCTCGGCTTAACCGGGGAACTGCA  
TCTGATACTGGATGGCTTGGGATCGGGAGAGGGATGCGGAATTCAGGTGTAGTGGTGAA  
ATGCGTAGATATCTGGAGGAACACCGGTGGCGAAGGCGGCATCCTGGACCGACACTGACG  
CTGATGAGCGAAAGCCAGGGGAGCAAACGGGATTAGATACCCCTGTAGTCC

>Otu5082

CCAGCCTACGGGAGGCTGCAGTCGAGAATCTTCCGCAATGGACGAAAGTCTGACGGAGCG  
ACGCCGCGTGGTTGATGAAGCGCTTCGGCGCGTAAAAACCTTTTATGAGCGACTAAGTTT  
ATTGAAGAGCTCATGAATAAGAGGTTGCTAAACTCGTGCCAGCAGCAGCGGTAATACGAG  
TGCTCAAGCGTTATCCGGAATTATTGGGCGTAAAGGGTGTGTAGGTGGCTGTGTTAGTC  
TCGCGTTAAATTCTTCGGCTCAACCGGGGACCTGCGCGGGAAACGGCACTGCTAGAGGAT  
GCGAGGGGTCTTTGGAACCTCATGGTGTAGCGGTGAAATGCGTTGATATCATGGGGAACAC  
CGAAAGCGAAGGCAGAAGACTGGAGCACCCCTGACACTGAAACACGAAAGCGTGGGTAGC  
GAATGGGATTAGATACCCCTGTAGTCC

>Otu5084

CCAGCCTATGGGGGGCAGCAGTAAGGAATATTGGTCAATGGACGCAAGTCTGAACCAGCC  
ATGCCGCGTGAAGGATGAAGGCCTTAGGGTTGTAAAGCTCTTTTGGCAGGGACGATAATG  
ACTGTACCTGCAGAATAAGCCCCGGCCAACTTCGTGCCAGCAGCCGCGGTAATACGAAGG  
GGGCTAGCGTTGCTCGGAATCACTGGGCGTAAAGCGCACGTAGGCGGGTCGTTAAGTCGG  
GGGTGAAATCCTGGAGCTCAACTCCAGAAGTGCCTTCGATACTGGCGATCTTGAGTCCG  
GGAGAGGTGGGTGGAACCTGCGAGTGTAGAGGTGAAATTCGTAGATATTCGCAAGAACACC  
AGTGGCGAAGGCGGCTCACTGGCCCCGTACTGACGCTGAGGTGCGAAAGCGTGGGGAGCA  
AACAGGATTAGAGACCCTAGTAGTCC

>Otu5085

CCAGCCTATGGGGTGCACCAGTGAGGAATATTCCACAATGGACGCAAGTCTGATGGAGCG  
ACGCCGCGTGCAGGAAGAAGCCCTTCGGGGTGTAAGTCTTTTTTTAGGGACGAACAAA  
TGACGGTACCTAAAGAATAAGAGGCTGCTAACTTCGTGCCAGCAGCAGCGGTAATACGAA  
GGCCTCAAGCGTTATCCGGAATTATTGGGCGTAAAGCGTCCGCAGGCGGTTTGAAAGCG  
TGTCGTTAAATTTTCAGGGCTCAACCCCGAAACAGCGATGCGAACTTCCAAACTAGAGTGT  
GGGAAAGGCATCTGGAATTGTGCGGTGTAGTAGTAAATGCGTTAATATCGACAGGAACAC  
CAAAAGCGAAAGCATGATGCTGGAACACTACTGACGCTCAGGGACGAAAGCGTGGGGAGC  
GAATCGGATTAGAAACCCCAGTAGTCC

>Otu5087

CCAGCCTACGGGAGGCACCAGTGGGGAATTTTGCGCAATGGGGGAAACCCTGACGCAGCA  
ACGCCGCGTGAGGATGAAGTACTTCGGTACGTAAACTCCTTTTCGATCGGGACGATAATG  
ACGGTACCGGAAGGAGAAGCCCCGGCTAACTTCGTGCCAGCAGCCGCGGTAATACGTAGG  
CAGCAAGCGTTGTTCCGAATTACTGGGCGTAAAGAGTGCCTAGGCGGTGTTCTAAGTCTG  
TTGTGAAATCTCCTGGCTCAACTGGGAGGGTGCGGCGGAGACTGGAATACTAGAGTATGG  
GAGAGGTAAGCGGAATTCCTGGTGTAGCGGTGAAATGCGTAGATATCAGGAGGAACACCT  
GTGGTGTAGACAGCTTACTGGACCATGACTGACGCTGAGGCACGAAAGCGTGGGTAGCAA  
ACAGGATTAGATACCCCAGTAGTCC

>Otu5088

CCAGCCTATGGGTTGCTGCAGCTTGGGAATATTGGGCAATGAGCGAAAGCTTGACCCAGCG  
AGAATTCCTGCGTGAAGAAGGTTTTGTGCTAAAGCGCTTTTGTAGAAAAGAAAAAGAC  
ATGATCTAATGTAAATAAGTCCCGCTAATTCTGTGCCAGCAGCCGCGGCAATACAGAAG  
GGGCGAGCGTTATTCATCTGTATTGGGTGTAAAGGGTATGTAGGTTGCTTTAAAAACCAT  
TTGTTAAATTTTTGAGAAAAACTGAAGAAAAACAAATGCCAATTATAAAGCTTGAGTTAT  
ACAGAAGTTGGGAGAATTTTATAATGAGAGATAAAATTCATAGATCTATAAAGAAGACC  
AAAGGCCGAGGCACCCCTTCTAGGTATAACTGACACTGAGGTACGAAAGTATGGGTAGCAA  
ACAGGATTAGAAACCCCTCGTAGTCC

>Otu5090

CCAGCCTATGGGGGGCAGCAGTGGGGAATATTGGACAATGGGGGCAACCCTGATCCAGCG  
ATGCCGCGTGCGTGAAGAAGGCCTTCGGGTGTAAAGCCCTTTAGGCTGGGAAGAAGTAT  
ATGTGGTGAATAGCCATGTATATTGACGGTACCAGCAGAATAAGCACCGGCAAACTCTGT  
GCCAGCAGCCGCGGTAATACAGAGGGTGCGAGCGTTAATCGGATTTACTGGGCGTAAAGG  
GCGCGTAGGCGGTTATATTAGTGTGATGTGAAAGCCCTGGGCTCAACCTAGGAAGTGCAT  
CGCAAACGGTATAACTGGAGTATAAGAGAGGGCGGTGGAATTTCCGGTGTAGCGGTGAAA  
TGCGTAGAGATCGGAAGGAACGTCAATGGCGAAGGCAGCCACCTGGCTTAATACTGACGC  
TGAGGCGCGAAAGCGTGGGGAGCGAACAGGATTAGAGACCCGAGTAGTCC

>Otu5094

CCAGCCTACGGGGTGCTCCAGTAGGGAATATTGCGCAATGGACGAAAGTCTGACGCAGCC  
ACGCCGCGTGAGTGAGGAAGGCCTTCGGGTGTAAAGCTCTGTTCATCCGGGAAAAACGGC  
TATTGGGGGAAAGTTCCAGTAGCGTGATGGTACCGGAGAAGGAAGCACCGGCAAACTCTG  
TGCCAGCAGCCGCGGTAATACAGAGGGTGCAAGCGTTGTTCGGAATTACTGGGCGTAAAG  
CGTGCGTAATCGGTATTGAGAGTCGCGGGTGAAATCCCAAGGCTTAACCTTGGAACTGCC  
TGTGAGACCTCAGTACTAGAGTGTGAGAGGGGATAGTGGAATACCCAGTGTAGCGGTGAA  
ATGCGTAGAGATTGGGTGGAACACCGGTGGCGAAGGCGGCTATCTGGCTCACAACTGACG  
ATCAGGCACGAAAGCGTGGGGAGCAAACAGGATTAGAAACCCCGTAGTCC

>Otu5095

CCAGCCTATGGGAGGCAGCAGACGAGAATATTGCACAATGGGCGAAAGCCTGATCGAGGG  
ATGCCGCGTGCGGGAAGAAGGGCTTCGGCTGTAAACCGCTTTTATGTGGGAAGAACTCT  
GACGGTACCACAAGAATAAGGGGTTGCTAACCTCGTGCCAGCAGCAGCGGTAATACGAGG  
ACCCCAAGCGTTATCCGGAATTACTGGGCGTAAAGCGTGAGCAGCCGGTTTTGCTAGTCT  
TATGTTAAATCTCACTGCTCAACGGTGAGACAGCGTGGGAAACGGCAATACTAGAGCGGG  
TAAGAGGTAGACGGAACGTGCAGTGTAGGGGTGAAATCCATTGATATTGCACGGAACACC  
AAAAGCGAAAGCAGTCTACTAGTGCTCTGCTGACGGTCAATCACTAAAGCGTGGGGATCA  
AAAAGGATTAGATACCCGCGTAGTCC

>Otu5096

CCAGCCTACGGGGGGCTCCAGTAGGGAATATTGGACAATGGGCGGAAGCCTGATCCAGCC  
ATGCCGCGTGCGGAAGAAGGCCTTATGCGTTGTAAACTGCTTTTGATCGGGAATAAAAG  
GACCTTGCGGGGTAAATTGAATGTACCGATAGAATAAGCCACGGCTAACTACGTGCCAGC  
AGCCGCGGTAATACGTAGGTGGCGAGCGTTATCCGGATTTATTGGGTTTAAAGGGAGCGT  
AGGCGGTTTTGTAAAGTCAGTGGTGAAGACGGCCGCTCAACGGTCGCATTGCCATTGATA  
CTGCAAGGCTAGAGTACAGTAGAGGTAGGCGGAATTTAGGGTGTAGCGGTGAAATGCATA  
GATACCTTAAAGAACCCGATTGCGAAGGCAGCTTACTGGACTGTAACCTGACGCTGAGGC  
ACGAAAGTGTGGGGATCAAACAGGATTAGAAACCCGCGTAGTCC

>Otu5098

CCAGCCTACGGGTGGCACCAGTGGGGAATATTGGACAATGGGGGGAACCCTGATCCAGCA  
ATGCCGCGTGTGTGAAGAAGGCCTGCGGGTTGTAAAGCACTTTGGTTGGGGAGGAAAGGC  
GGTAGTGAATAACTAGCTGAGTTGACGTTACCCAAAGAACAAGCACCGGCTAACTCTGT



GCCAGCAGCCGCGGTAATACAGAGGGTGCAAGCGTTAATCGGAATTACTGGGCGTAAAGG  
GCGCGTAGGCGGTAAATAAGTTATGTGTGAAAGCTCTGGGCTTAACCTGGGAACGAC  
ATAATACTGTTTAGCTAGAGTAGAGTAGAGGAAAGTGGAATTTCCGGTGTAGCGGTGAAA  
TGCGTAGATATCGGAAGGAACACCAGTGGCGAAGGCGGCTTTCTGGACTCATACTGACGC  
TGAGGCGCGAAAGCGTGGGGAGCAAACAGGATTAGAAACCCGCGTAGTCC

>Otu5100

CCAGCCTACGGGAGGCACCAGTGGGGAATATTGGACAATGGGGGAAACCTGATCCAGCA  
ATGCCGCGTGGGTGATGAAGGCCTTCGGGTGTAAAGCCCTTTTGGCGGGGACGATGATG  
ACGGTACCCGCGAGAAGAAGCCCCGGCTAACTTCGTGCCAGCAGCCGCGGTAATACGAAAG  
GGGCTAGCGTTGTTTCGGAATTACTGGGCGTAAAGGGCGCGTAGGCGGCTTTGTTAGTTGG  
GCGTGAAATGCCTGGGCTCAACCCAGGAATTGCGCTCAATACTTCGAGGCTAGAGTGTGG  
GAGAGGATAGTGGAATTCACAGTGTGGAGGTGAAATTCGTAGATATTGGGAAGAACACCG  
GTGGCGAAGGCGGCTATCTGGACCACAACCTGACGCTGAGGCGCGAAAGCGTGGGGAGCAA  
ACAGGATTAGAAACCCCGGTAGTCC

>Otu5102

CCAGCCTATGGGGGGCACCAGCTAAGAATCTTCCGCAATGGACGAAAGTCTGACGGAGCG  
ACGCCGCGTGGGTGATGAAGGCGGAACGTTGTAAACCCCTTTTGTAGACGAGGAATAAG  
CGTGGGAGGGAATGCCTGCGTGATGACGGTAGTCTGCGAATAAGCCCCGGCTAATTACGT  
GCCAGCAGCCGCGGTAGCACGTATGGGGCGAGCGTTGTTTCGGAATTATTGGGCGTAAAGG  
GTGTGCAGGCGGTTATCTAAGTCTGGCGTGAAAGACCCGAGCTTAACCTCGGGGAACGCGT  
TGGAACCTGGGTGACTAGAGTTCTGGAGGGGTAGCTGGAATTCAGGTGTAGGGGTGAAA  
TCTGTAGATATCTGGAAGAACATCAGTGGCGAAGGCGAGCTACTAGCCAAGGACTGACGC  
TGAGACACGAAAGCGTGGGGAGCAAACAGGATTAGATAACCCCGTAGTCCC

>Otu5105

CCAGCCTATGGGAGGCAGCAGTGGGGAATATTGGACAATGGGGGCAACCTGATCCAGCC  
ATGCCGCGTGAGTGATGAAGGCCTTCGGGTGTAAAGCTCTTTTGCAGGGGACGATGATG  
ACGGTACCCTGAGAATAAGCTCCGGCTAACTTCGTGCCAGCAGCCGCGGTAATACGAAGG  
GAGCTAGCGTTGTTTCGGAATTACTGGGCGTAAAGGGCGTG TAGGCGGCTTGGAAGTTGG  
ATGTGAAAGCCCAGGGCTCAACCCGTGAATTCGATTCAAGACTGCCTTGCTTGAATTCGG  
TAGAGGTTGGTGGAATTCACAGTGTAGAGGTGAAATTCGTAGAGATTGGGAAGAACACCC  
GTGGCGAAGGCGGCCAACTGGACCGACATTGACGCTGAGACGCGAAAGCGTGGGGATCAA  
ACAGGATTAGATAACCTAGTAGTCC

>Otu5106

CCAGCCTACGGGTGGCAGCAGTGGGGAATCCTGCGCAATGGGCGAAAGCCTGACGCAGCG  
ACGCCGTGTGTGCGATGAAGGTTTTTCGGATCGTAAAGCACTGTCGCCCCGGGAAAAAGAGC  
GTGATGGTACCGGGAGAGGAAGCACCGGCTAACTCTGTGCCAGCAGCCGCGGTAATACAG  
AGGGTGCAGCGTTGTTTCGGAATTATTGGGCGTAAAGCGCTGGTAGGTGGCCATTTAAGT  
CGCGTGTGAAAGCTCCAGGCTCAACCTGGAAAGGGCGCGCGAAACTGGGAGGCTTGAGTA  
CCGGAGAGGGTCGCGGAATTCCCGGTGTAGAGGTGAAATTCGTAGATATCGGGAGGAACA  
CCAGAGGCGAAGGCGGCGACCTGGAAGGCAACTGACACTGAGCAGCGAAAGCGTGGGGAG  
CAAACAGGATTAGAAACCCCGGTAGTCC

>Otu5108

CCAGCCTACGGGGTGCACCAGTGGGGAATTTTTCGCAATGGGGGAAACCTGACGCAGCA  
ACGCCGCGTGGAGGATGAAGTCCCTTGGGATGTAAACTCCTTTTCGACCGGAAGATGATG  
ACGGTACCGGTAGAAGAAGCACCGGCTAACTCTGTGCCAGCAGCCGCGGTAATACAGAGG  
GTGCGAGCGTTGTTTCGGAATTATTGGGCGTAAAGGGCGCGTAGGCGGCGCGGTAAGTCAC  
CTGTGAAATCTCCCGGCTCAACCGGGAGTCTGCAGGCGAAACTGCCGTGCTGGAGTATGG  
GAGAGGTGCGTGGAATTCACCGGTGTAGCGGTGAAATGCGTAGATATCGGGAGGAACACCT  
GTGGCGAAAGCGGCGCACTGGACCATAACTGACGCTGAGGCACGGAAGTGTGGGGATCAA  
ACAGGATTAGATAACCCCGTAGTCC

>Otu5109

CCAGCCTATGGGTTGCAGCAGTAAGGAATATTGGACAATGGGCGCAAGCCTGATCCAGCC  
ATGCCGCGTGCAGGATGAAGGTACTCTGCATTGTAAACTGCTTTTGTGTTGGGAATAAAC  
CTTCTACGTGTAGAGGGCTGAATGTACCAAAAAGAATAAGGGACGGCTAACTTCGTGCCAG  
CAGCCGCGGTAATACGAAGGTCCCAGCGTTATCCGGATTTATTGGGTTTAAAGGGTGCG  
TAGGCGGATTATTAAGTCAGTGGTGAAAGCCTACAGCTTAACCTGTAGAATTGCCATTGAT  
ACTGATGATCTTGAGTATGATTGAGGTGGGCGGAATGTGTTCATGTAGCGGTGAAATGCTT  
AGATATGACACAGAACACCGATTGCGAAGGCAGCTCACTAAGTCATAACTGACGCTGATG

CACGAAAGCGTGGGGAGCAAACAGGATTAGAGACCCCCGTAGTCC

>Otu5111

CCAGCCTATGGGACGCTGCAGTAGGGAATATTGGGCAATGGGCGCAAGCCTGACCCAGCC  
ATGCCGCGTGCGGGAGGAAGGCCCTCTGGGTTCGTAAACCGCTTTTGGGAGGGGACAAAAT  
TCCCGTGCGCGGGCGATTGAGGGTACCTCCAGAATAAGCACCGGCTAACTCCGTGCCAGC  
AGCCGCGGTAATACGGAGGGTTCGAGCGTTGTCCGATTATTGGGTTTAAAGGGTTCGT  
AGGCGGCCCCGATAAGTCAGCGGTGAAACCCACGGGCTCAACCCGTGGCGTGCCGTTGATA  
CTGTTGGGCTTGGGTTGGCTCTGGGCGGGCGGAACGGAAGGTGTAGCGGTGAAATGCATA  
GATATCTACCAGAACGCCGACAGCGAAGGCAGCTCGCTGGGGCCCCGACCGACGCTGAGGC  
ACGATAGCGTGGGGATCAAACAGGATTAGATACCCGAGTAGTCC

>Otu5112

CCAGCCTATGGGGTGCTCCAGTCGAGAATCTTCCGCAATGGGCGAAAGCCTGACGGAGCG  
ACGCCGCGTGATTGATGAAGTCCTTCGGGACGTAAAGATCTTTTATGAGGGAGGAAGTCA  
TTGACGTTACCTCATGAATAAGGGGCTCCTAACTCTGTGCCAGCAGGAGCGGTAATACAG  
AGGCCCCAAGCATTATCCGGAATCACTGGGCGTAAAGGGTGTGTAGGCGGCGTAGTTAGT  
CTTTCGTAAAAGATCTCTGGCTTAAGTGGGAAATGCGGGAGAAACGGCTATGCTCGAGG  
ACGCGAGAGGTAAAGGGAACTCATGGTGTAGGGGTGAAATCCGTTGATATCATGGGGAAC  
ACCAAATGCGAAGGCACCTTACTGGCGCGCTCCTGACGCTGAAACACGAAAGCGTGGGAA  
TCGAACGGGATTAGATACCCCAGTAGTCC

>Otu5113

CCAGCCTATGGGGGGCAGCAGCTAAGAATCTTCCGCAATGGGCGAAAGCCTGACGGAGCG  
ATGCCGCGTGATCGATGAAGGTCGAGAGATTGTAAAGATCTTTTACAGCTGAGGAATAAA  
CCCAGGAGGGAATGCCTGGGAGATGACGTTAAGCTGTGAATAAGCCCCGGCTAATTACGT  
GCCAGCAGCCGCGGTAACACGTAAGGGGCGAGCGTTGTTTCGGAATTATTGGGCGTAAAGG  
GCACGCAGGCGGCCTGACAAGTCTGGTGTGAAATCTCCGGGCTCAACTCGGGAAACGCGC  
TGGAAGTGTCAAGCTAGAGTAGTAGAGGGGGAGTCGGAATTCCTAGTGTAGGGGTGAAA  
TCTGTTGATATTAGGAAGAACACCGGTGGCGAAGGCGGACTCCTGGCTGGATACTGACGC  
TGAGGTGCGAAAGCATAGGGAGCAAACAGGATTAGAGACCCGTGTAGTCC

>Otu5115

CCAGCCTACGGGGCGCAGCAGTAAGGAATATTGGACAATGCCCCGAAGGGTGATCCAGCC  
ATGCCGCGTGACAGGAAGAAGGCCCTATGGGTTCGTAAACTGCTTTTACACCGGAGAAAACC  
CCCGATCGTGATCGGGGCTGATAGTATGGTGAGAATAAGCATCGGCTAACTTCGTGCCAG  
CAGCCGCGGTAAGACGAAGGATGCAAGCGTTATCCGGATTCATTGGGTTTAAAGGGAGCG  
TAGGTGGACTGATAAGTCAGTGGTGAATCTTCGGGCTTAACCCGAAAATTGCCATTGAT  
ACTGTTGGTCTTGAGTACAGTTGCTGTGGGCGGAATATGACATGTAGTGGTGAATACAT  
AGAGATGTCATAGAACACCGATTGCGAAGGCAGCTCACAAAGCTGTAAGTGAAGTGAAGG  
CTCGAAAGTGCGGGGATCAAACAGGATTAGAAACCCCAGTAGTCC

>Otu5117

CCAGCCTATGGGTTCGAGCAGTAAGGAATATTGGACAATGCCCCGCCAGGGTGATCCAGCC  
ATGCCGCGTGACAGGAAGAAGGCCCTATGGGTTCGTAAACTGCTTTTACACCGAGAGAAAACC  
CTCCTTCGTGAAGGAGGCTGATAGTACGGTGAGAATAAGCATCGGCTAACTTCGTGCCAG  
CAGCCGCGGTAAGACGAAGGATGCAAGCGTTATCCGGATTCATTGGGTTTAAAGGGAGCG  
TAGGCGGCCTTATAAGTCAGTGGTGAATCTCCTCGCTTAACGAGGAAATTGCCATTGAT  
ACTGTAAGGCTTGAGTACAGTTGCCGTTGGCGGAATATGACATGTAGTGGTGAATACAT  
AGAGATGTCATAGAACACCGATTGCGAAGGCAGCTAACGAACTGTAAGTGAAGTGAAGG  
CTCGAAAGTGCGGGGATCAAACAGGATTAGAGACCCCGTAGTCC

>Otu5118

CCAGCCTATGGGGTGCTCCAGAGAGCCCCAACGCCGCTTGCGCCATCGGGGCCGATCAAT  
ATGACATCCATTTCTCTAACCAACTGAAAATATTCAATTAATCGCCGGACTCTACTGATT  
CACCGACTATTTTGGTACAACGCGCGGTGCCCGCTTTTGCTCGAATTCCTGTCTTAGTCG  
TACAGGCATAAGGCCAATAAGCGTGGTTCGGCAGACCAGGGGGAGCTTCTGATTTCAGCGCG  
CGAACAGTGCCGACGGTCGGCTCGCAGAACGGCTCGCGGAAGATTACGGCGGCGACCTGG  
TTCGATTTATCGCCCGGCGCCTTCGAACAGAGCCGACGCCAGGACTTGGCGCAGGAAG  
TCTACTTACGGTTGCTGCGGCTGGAACGCAAAGACCTGATTAGAGACCCCTTGTAGTCC

>Otu5119

CCACCTACGGGATGCAGCAGTAGGGAATATTGGGCAATGGGCGCAAGCCTGACCCAGCCA  
TGCCGCGTGAAAGGATGAAGGCCCTCTGGGTTGTAAACTTCTTTTATAGGGGACGAAAAAT  
AGGTATTCTTACTTACTTGACGGTACCCTAGGAATAAGCACCGGCTAACTCCGTGCCAGC

AGCCGCGGTAATACGGAGGGTGCAAGCGTTATCCGGATTTACTGGGTTTAAAGGGTGCGT  
AGGTGGGCAGGTAAGTCAGTGGTGAATCTTCGAGCTTAACTCGGAAACTGCCATTGATA  
CTATCTGTCTTGAATTATCTGGAGGTAAGCGGAATATGTCATGTAGCGGTGAAATGCTTA  
GAGATGACATAGAACACCCATTGCGGAGGCAGCTTACTACGGCTCGATTGACACTGAGGC  
ACGAAAGCGTGCGGATCAAACAGGATTAGATAACCCAGTAGTCC

>Otu5120

CCAGCCTATGGGGGGCAGCAGTCGAGGATCTTTTCGCAATGGGCGCAAGCCTGACGAAGCG  
ACGCTGCGTGAGCGATGAAGGCCTTCGGGTCGTAAAGCTCTTTTCGCGCAAGAACAAGGAA  
ATGATATGAATAATATCGTAACTTGAGGGTACTGCGTAAAGAAGCGCCGGCTAACTCCGT  
GCCAGCAGCTGCGGTAATACGGAGAGCGCAAGCATTAAATCGGAATTATTGGGCGTAAAGG  
GCGCGTAGGCGGGACGGTAAGTCAGATGTGAAATTCCGAAGCTCAACTTCGGAGCTGCAT  
TTGAAACTGCCATTCTAGAGGGTAGACGGAGAAAATGGAATTCACGTGTAGCGGTGAAA  
TGCGTAGATATGTGGAAGAACACCGGTGGCGAAAGCGGTTTTCTAGTTTATACCTGACGC  
TGAGGCGCGAGAGCAAGGGGAGCAAACAGGATTAGATAACCCAGTAGTCC

>Otu5123

CCAGCCTATGGGGCGCAGCAGTCGAGAATCTTCCACAATGGACGAAAGTCTGATGGAGCG  
ACGCCGCGTGATTGATGAAGTCCTTAGGGACGTAAAGATCTTTTATGAGGGAAGAAGTTT  
ATTGACGGTACCTCATGAATAAGGGGCTCCTAATCTCGTGCCAGCAGGAGCGGTAATACG  
AGAGCCCCGAGCGTTATCCGGAATTATTGGGCGTAAAGGGTGCGTAGGCGGTTTTATTAG  
TCGAGCGTTAAATACCCGAGCTTAACTTGGGGACTGCGCTCGAAACGGTAAGACTTAGAA  
TGAAGGAGAGGTGTGCGGAACCATGGTGTAGGGGTGAAATCCGTTGATATCATGGGGAA  
CACCGAAAGCGAAAGCAGCACACTGGCCTTTTATTGACGCTGATGCACGAAAGCGTGGGT  
AGCGAATGGGATTAGAAACCCCGTAGTCC

>Otu5124

CCAGCCTATGGGTGGCTGCAGTCGAGAATTTTTCACAATGGGGGAAACCCTGATGGAGCG  
ACGCCGCGTGGGGGATGAATGGCTTCGGCCCGTAAACCCCTGTCATTTGCGAGCAAACCT  
TTTCATTTAACAGACGAAAAGCTGATTGTAGTGGAAGAGGAAGGGACGGCTAACTCTGTG  
CCAGCAGCCGCGGTAATACAGAGGTCCCAAGCGTTGTTTCGGATTCACTGGGCGTAAAGGG  
TGCGTAGGCGGTTCGGGTAAGTCTGACGTGAAATCTCCGGGCCTAACCCGAAACTGCGTC  
GGATACTATCCGGCTAGAGGATTGGAAGGGAGACTGGAATACTTGGTGTAGCAGTGAAAT  
GCGTAGATATCAAGTGGAACACCAGTGGCGAAGGCGAGTCTCTGGACAATTCCTGACGCT  
GAGGCACGAAAGCCAGGGGAGCAAACGGGATTAGAGACCCTCGTAGTCC

>Otu5125

CCAGCCTATGGGTGGCTGCAGTAGGGAATATTGGACAATGGGCGAGAGCCTGATCCAGCC  
ATGCTGCGTGCAAGGAAGAAGGCCTTCTGGGTTGTAACTGCTTTTGCCAGGGGATAAAAAG  
ACCCGTGCGCGGGGAATTGAAGGTACCTGGTGAATAAGCCACGGCTAACTACGTGCCAGC  
AGCCGCGGTAATACGTAGGTGGCAAGCGTTGTCCGGATTTATTGGGTTTAAAGGGTGCGT  
AGGCGGCCTGTAAAGTCAGGGGTGAAAGACGGTAGCTTAACTATCGCAGTGCCTTTGATA  
CTGACGGGCTTGAATGTAGTTGAGGTAGGCGGAATGTGACAAGTAGCGGTGAAATGCATA  
GATATGTCACAGAACTCCAATTGCGAAGGCAGCTTACTAAAGTATGATTGACGCTGAGGC  
ACGAAAGCGTGCGGATCAAACAGGATTAGAAACCCTAGTAGTCC

>Otu5127

CCAGCCTACGGGGTGCTGCAGTCGAGAATCTTGGGCAATGCACGAAAGTGTGACCCAGCG  
ACGCCGCGTGAGGATGAAGGACCTCTGGTTCGTAAACTCCTTTTAGGGGAGAAGAAGCT  
CTGACGGTATCCCCTGAATAAGCCACGGCTAACTACGTGCCAGCAGCCGCGGTAATACGT  
AGGTGGCAAGCGTTGTCCGGATTTACTGGGCGTAAAGCGTATGCAGGCGGACCTTTAAGT  
AGGAAGTGAAAGGTTGGAGCTCAACTCTAACACTGCTCCCTATACTGGAGGTCTTGAGTG  
CCGGAGAGGAAGATGGAACACACGTGTAGCGGTGAAATGCGTTGAGATGTGTAGGAACA  
CCAATGGCGAGAGCAATCTTCTGGACGGATACTGACGCTGAGATACGAAAGCCAAGGTAG  
CAAACAGGATTAGATAACCCGTGTAGTCC

>Otu5129

CCAGCCTACGGGGGGCAGCAGTCAAGAACACTCGACAATGGGCGAAAGCCTGATCGAGCG  
ACACCGCGTGCAAGGAAGAAGGCCTTCGGGTCGTAAACTGCGGTAGTATGGTAACAATGTA  
AATGAGTGCCATACGGAAGAGGTGGGTAACCTACGTGCCAGCACCAGCGGTAATACGTAG  
ACCTCAAGCGTTATCCGGATTTATTGGGCGTAAAGAGCATGTAGGAGGTTTTGTGCGTCT  
CTGGTTAAATCCCATCGCCTAACGGTGGACATGCCGGAGATACGACAAGACTAGAGGGGG  
TTAGAGGTGCATGGAACGCACGGTGTAGGGGTGAAATCCGTTGATATCGTGCGGAACACC  
AAAGGCGAGGGCAGTGCACCTGGGACCTTCCTGACTCTGAGATGCGAAAGCGTGGGGAGCA

AAAAGGATTAGAAACCCCTTGTAGTCC

>Otu5132

CCAGCCTACGGGATGCTGCAGTCGAGAATCTTCCACAATGGACGAAAGTCTGATGGAGCG  
ACGCCGCGTGTTGATGAAGTCCTTCGGGACGTAAAAACCTTTTATGAGGGAGGAAGTTA  
TTGACGTTACCTCATGAATAAGGGGCTCCTAACTCTGTGCCAGCAGGAGCGGTAATACAG  
AGGCCCCAAGCATTATCCGGAATCACTGGGCGTAAAGGGTGTGTAGGCGGTCGTATTAGT  
CTTTTGTTAAAGTTCTCCGGCTTAACCGGAGAAATGCAGGAGAAACGGTACGACTCAGAG  
GACGTAAGAGGTAAAGGGAACCTCATGGTGTAGGGGTGAAATCCGTTGATATCATGGGGAA  
CACCAAATGCGAAGGCACCTTACTGGTACGCTCCTGACGCTGAAACACGAAAGCGTGGGA  
ATCGAACGGGATTAGATACCCGCGTAGTCC

>Otu5133

CCAGCCTATGGGGGGCACCAGTGGGGAATATTGGACAATGGGCGCAAGCCTGATCCAGCA  
ATGCCGCGTGTTGAAGAAGGTCTTCGGATTGTAAAGCACTTTTGGCAGGGATGATGATG  
ACGGTACCTGCAGAATAAGCCCCGGCTAACTTCGTGCCAGCAGCCGCGGTAATACGAAGG  
GGGCTAGCGTTGTCCGATTTATTGGGTTTAAAGGGTGCCTAGGCGGCCCTGTAAGTCAG  
TGGTGAAATACGGCAGCTCAACTGTGAGGTGCCATTGATACTGCAGGGCTTGAGTACAG  
ACGAGGTAGGCGGAATTGACGGTGTAGCGGTGAAATGCTTAGATATCGTCAAGAACACCG  
ATAGCGAAGGCAGCTTACTAGGCTGTAACCTGACGCTGAGGCACGAAAGTGCGGGGATCAA  
ACAGGATTAGATACCCCTCGTAGTCC

>Otu5136

CCAGCCTATGGGGGGCAGCAGTGGGGAATATTGGACAATGGGCGCAAGCCTGATCCAGCC  
ATGCCGCGTAAGTGATGAAGGCCCTTAGGGTTGTAAAGCTCTTTCGCTAGGGACGATAATG  
ACGGTACCTAGACAAGAAGCCCCGGCTAACTTCGTGCCAGCAGCCGCGGTAATACGAAGG  
GGGCTAGCGTTGTTCCGAATTACTGGGCGTAAAGCGCGTGTAGGCGGGCTTTTAAGTCAG  
GGGTGAAATCCTGGAGCTCAACTCCAGAACTGCCCTTGATACTGAGAAGCTTGAGTCCAG  
GAGAGGTGAGTGGAAGTGCAGGTGTAGAGGTGAAATTCGTAGATATTCGCAAGAACACCA  
GTGGCGAAGGCGGCTCACTGGCCCGGTACTGACGCTGAGGTGCGAAAGCGTGGGGAGCAA  
ACAGGATTAGATACCCCTAGTAGTCC

>Otu5139

CCAGCCTACGGGGCGCACCAGTAAGGAATATTGGACAATGGACGAAAGTCTGATCCAGCC  
ATGCCGCGTGAAGGATTAAGGTCCTCTGGATTGTAAACTTCTTTTATCTGGGACGAAAAA  
AGGGAATTCTTTCTCACTTGACGGTACCAGATGAATAAGCACCGGCTAACTCCGTGCCAG  
CAGCCGCGGTAATACGGAGGGTGCAAGCGTTATCCGGATTCACTGGGTTTAAAGGGTGC  
TAGGCGGGTAGGTAAGTCAGTGGTGAAATACCGGAGCTTAACTCCGGAAGTGCCATTGAT  
ACTATCTATCTTGAATATTGTGGAGGTAAAGCGGAATATGTCATGTAGCGGTGAAATGCTT  
AGATATGACATAGAACACCCATTGCGAAGGCAGCTTACTACGCATATATTGACGCTGATG  
CACGAAAGCGTGGGGATCAAACAGGATTAGAAACCCGAGTAGTCC

>Otu5140

CAGCCTACGGGTGGCTGCAGTGGGGAATCTTGCGCAATGGACGAAAGTCTGACGCAGCGA  
CGCCGCGTGGGCGACGAAGGCCTTCGGGTTGTAAAGCCCTGTGGGGCGGGACGAACACGC  
CCGGGTGCAATAGGCCCGGGTGCTGACGGTACCTGCTTAGCAAGCACCGGCTAACTCTGT  
GCCAGCAGCCGCGTAAGACAGAGGGTGCAAACGTTGCTCGGAATTACTGGGCGTAAAGC  
GCGTGTAGGCGGTTTTCGCAAGTCAGGTGTGAAAGCCCCGGGGCTCAACCCCGGAAGTGCAC  
TTGATACTACGGAGCTGGAGTACTGAAGAGGAGAGCGGAATTCCTGGTGTAGAGGTGAAA  
TTCGTAGATATCGGGAGGAACACCAAGTGCGAAGGCGGCTCTCTGGGCAGATACTGACGC  
TGAGACGCGAAAGCGTGGGTAGCAAACAGGATTAGAAACCCGCGTAGTCC

>Otu5144

CCAGCCTACGGGGGGCAGCAGTCGAGAATCTTCCGCAATGGACGAAAGTCTGACGGAGCG  
ACGCCGCGTGACTGATGAAGTCCTTAGGGACGTAAAGGTCTTTTATGAGGGAAGAAGTTT  
ATTGACGGTACCTCAAGAATAAGGGGCTCCTAATCTCGTGCCAGCAGGAGCGGTAATACG  
AGAGCCCCGAGCGTTATCCGGAATAACTGGGCGTAAAGGGTGTGTAGGTGGCATTATTAG  
TCCGTTGTTAAAACCCCGAGCTCAACTTGGGAGATGCAATGGAAACGGTAAAGCTTAGAG  
AGTGCGAGAGGTGAATGGAACCTCATGGTGTAGGGGTGAAATCCGTTGATATCATGGGGAA  
CACCGAAGGCGAAGGCAATTCCTGGCGCATTTCTGACACTGAAACACGAAAGCGTGGGT  
AGCGAATGGGATTAGAAACCCCTCGTAGTCC

>Otu5145

CCAGCCTACGGGATGCTGCAGTGGGGAATTTTTCGCAATGGGGGAAACCCCTGACGCAGCA  
ACGCCGCGTGAGAGGATGAAGCCCCTTGGGGCGTAAACTCCTTTTCGACCAAGACGATAATG

ACGGTACTGGTGGGAAGCACCGGCTAACTCTGTGCCAGCAGCCGCGGTAATACAGAGG  
GTGCGAGCGTTGCTCGGAATTATTGGGCGTAAAGGGCGCGTAGGCCGGTATGGTAAGTCAC  
CTGTGAAACCTCTAAGCTTAACTTAGAGCCTGCAGGCGAAACTGCCATGCTGGAGGGTGG  
GAGAGGTGCGTGGAATTCCTGGTGTAGCGGTGAAATGCGTAGATATCGGGAGGAACACCT  
GTGGCGAAAGCGGCGCACTGGACCATAACTGACGCTGAGACGCGAAAGCCAGGGGAGCGA  
ACGGGATTAGAAACCCTTGTAAGTCC

>Otu5148

CCAGCCTACGGGATGCTCCAGTAGGGAATTTTTCGCAATGGACGAAAGTCTGACGCAGCA  
ACGCCGCGTGAGGAAGAAGGCCCTCGGGTCGTAAACTGCTTTTATGTGCGACGAATTTG  
ACGGTAGCGTATGAATAAGGATCGGCTAACTCCGTGCCAGCAGCCGCGGTCATACGGAGG  
ATCCAAGCGTTATCCGGAATTACTGGGCGTAGAGAGTTGCGTAGGTGGTTGATTAAGCAA  
GGCATCAAATCTCACGGCTCAACCGTGAATCTATGTTTTGAACTAGTCGACTGGGGCATG  
AGAGAGGTAAGTGAATTCCAGGTGTAGGAGTGAAATCCGTAGATATCTGGAGGAACACC  
GATGGCGTAGGCAGGTTACTGGCTCATCGCCGACACTGAGGCACGAAAGCGTGGGGAGCG  
AACGGGATTAGATACCCGCGTAGTCC

>Otu5149

CCAGCCTACGGGACGCAGCAGTGAAGGAATTTTCGCAATGGGGGAGACCCTGACCGAGCA  
ATACTACGTGAAGGAAGAAGGTCTAAGGATTGTAAACTTCTGTTAGCGCGGAAGAAGGGC  
TAAACGAAAGTTTAGTTTTGACGGTACGCGCAGAGAAAGCCACGACTAACTATGTGCCAG  
CAGTCGCGGTAAAGACATAGGTGGCAAACGTTATCCGGAATTATTGGGCGTAAAGGATGCG  
TAGATGGTGTAAATAAGTTATCAGTGGAAAATCGGGGCTCAACCTCGTGGAAGCTGGTAAT  
ACTGTTATACTTGAGTTCAGGAGAGGTTAACGGAACCTCCATGTGGAGCGGTAAAATGCGT  
AGATATATGGAAGAACACCGATAAGGCGAAGGCAGTTAACTATTCTGTTACTGACATTGA  
GGCATGAAAGCGTGGGGAGCAAAACGGATTAGAAACCCCCGTAGTCC

>Otu5150

CCAGCCTATGGGGGGCACCAAGTGTGGAATTTTGGACAATGAACGAAAGTTTGATCCAGCG  
AAATCGTGTGAGTGAAGAAGGTTCTTATCGTAAACTTTATCGACATCGTATGAAAATGA  
CAGAAATGTTGTAGATGAAGTCCCGACTAACTTCGTGCCAGCAGTCGCGGTAAAACGGGGG  
GGACTAGTGTTATTCATCATTACTGGGTGTAAAGCGCATGTAGACGATTTATTAAGTTTTT  
AATTATGACAATCCAAACTTAATTTGGAAGATAATTATTATACTAGTAAATTAGAGGTCA  
AAGGAGGAAAAGCTATATTTCTGATGTAGGGATGAAATCCTAATAGTTTAGGGGGATAAC  
CAGCAGGCGAAGGCGGCTTTCCATAATGATTCTGACGTTGAAGTGCTAAAGCGTGGGGCG  
CAAATGGGATTAGATACCCGCGTAGTCC

>Otu5153

CCAGCCTATGGGTGGCTCCAGTGAGGAATCTTTCGCAATGGGGGAAACCCTGACGCAGCA  
ACGCCGCGTGAGTGAGGAAGGCCTTCGGGTCGTAAAGCTCTGTGCGGTGGGAAGAAACGT  
ATGAGGGTTAATACTCCTTGACTTGACGGTACCGCCAAAGGAAGCACCGGCTAACTCCG  
TGCCAGCAGCCGCGGTAATACGGGGGGTGCAAGCGTTGTTTCGGAATTATTGGGCGTAAAG  
AGCGTGTAGGCGGCGTGATAAGTCAGATGTGAAAGCCCTGGGCTTAACCCAGGAAGTGTA  
TTTGAAGTGTCTTGCTTGAGTACGGGAGAGGGAAGAGGAATTCCTGGTGTAGAGGTGAA  
ATTCGTAGATATCAGGAGGAACACCGGTGGCGAAGGCGACTTCCTGGCCCCGATACTGACG  
CTGAGACGCGAGAGCGTGGGGAGCAAACAGGATTAGATACCCTGGTAGTCC

>Otu5154

CCAGCCTACGGGGTGCTGCAGTCGAGAATCTTCCGCAATGGACGAAAGTCTGACGGAGCG  
ACGCCGCGTGAGGATGAAGTGCTTCGGCATGTAAACTCCTTTTGCCAGGGAAAAAGTTT  
ATTGATTGTACCTGGAGAATAAGAGGTTGCTAAACTCGTGCCAGCAGCAGCGGTAATACG  
AGTGCCTCGAGCGTTATCCGGAATCATTGGGCGTAAAGGGTGCCTAGGCGGTTCTGTTAG  
TCCTGTGTTAAATCTACCGGCTCAACCGGTAGGCTGCATGGGAAACGGCAGAACTTGAGG  
ACGGTAGGGGTCTCTGGAACCTCATGGTGTAGCGGTGAAATGCGTTGATATCATGGGGAAC  
ACCGAAAGCGAAGGCAAGAGACTGGACCGCTCCTGACGCTGAAGCACGAAAGCGTGGGTC  
GCGAATGGGATTAGAAACCCGAGTAGTCC

>Otu5155

CCGCCTATGGGCGCAGCAGTGGGGAATTTTGGACAATGGGCGCAAGCCTGATCCAGCAAT  
GCCGCGTGAGTGAAGAAGGCCCTCGGGTTGTAAAGCTCTTTTGTGAGGAACGAAATCCCT  
TGGGCTAATACCTCGGGGGGATGACGGTACCTGAAGAATAAGCACCGGCTAACTACGTGC  
CAGCAGCCGCGGTAATACGTAGGGTGAAGCGTTAATCGGAATTACTGGGCGTAAAGCGT  
GCGCAGGCGGTTTTGTAAAGACAGGTGTGAGATCCCCGGGCTTAACCTGGGAACTGCATTT  
GTGACTGCAAGGCTTGAGTGTGTCAGAGGGAGGTGGAATTCGCGTGCTAGCAGTGAAATG

CGTAGAGATGCGGAGGAACACCGATGGCGAAGGCAGCCTCCTGGGACAACACTGACGCTC  
ATGCACGAAAGCGTGGGGAGCAAACAGGATTAGATACCCGAGTAGTCC  
>Otu5156  
CCAGCCTATGGGGGGCAGCAGTCGAGAATATTCGACAATGGACGAAAGTCTGATCGAGCG  
ACACCGCGTGTAGGATGAAGGCCCTCGGGTCGTAAACTACGGTAGATAGTTAACAATGCA  
AATGAGTGACTATTGGAAAGAGGTGGGTAACCTACGTGCCAGCACCAGCGGTAATACGTAG  
ACCTCAAGCGTTATCCGGATTTATTGGGCGTAAAGAGCATGTAGGAGGTTTTGTGCGTCT  
TCTGTTAAAGCCCAGAGCCTAACTCTGGAAGTGCAGGAGATACGACAAGACTAGAGGGGG  
TTAGAGGTGCATGGAACCTACGGTGTAGGGGTGAAATCCGTTGATATCGTGGGGAACACC  
AAAGGCGAAGGCAGTGCCTGAGCCTTCTGACTCTGAGTTGCGAAAGCGTGGGGAGCA  
AAAAGGATTAGAAACCCCCGTAGTCC  
>Otu5157  
CCAGCCTATGGGGTGCAGCAGTGGGGAATCTTGACAATGGGGGCAACCCTGATCCAGCC  
ATGCCGCGTGAGTGAAGAAGGCCCTTCGGGTGTAAAGCTCTTTCAGACGGAAAGAAACGG  
TTACGGCTAATACCCGTGACTAATGACGGTACCGTCAGAAGAAGCACC GGCTAACTACGT  
GCCAGCAGCCGCGGTAATACGTAGGGTGCAGCGTTAATCGGAATTACTGGGCGTAAAGC  
GTGCGCAGGCGGTTTTGTAAAGACAGGCGTGAAATCCCCGGGCTTAACCTGGGAACCTGCGT  
TTGTGACTGCAAGACTAGAGTGTGGCAGAGGGGGGTAGAATTCCACGTGTAGCAGTGAA  
ATGCGTAGATATGTGGAGGAATACCGATGGCGAAGGTAGCCCCCTGGGTCAACACTGACG  
CTCATGCACGAAAGCGTGGGGAGCAAACAGGATTAGATACCCGAGTAGTCC  
>Otu5158  
CCAGCCTATGGGTGGCTGCAGTGGGGAATCTTGACAATGGGGGAAACCCTGATGCAGCG  
ACGCCGCGTGAGCGATGAAGCCCTTCGGGGTGTAAGCTCTTTCGGCAGGGAAGATAGTG  
ACGGTACCTGCAGAAGCAGCTGCGGCTAACTACGTGCCAGCAGCCGCGGTAATACGTAGG  
CAGCGAGCGTTATTTCGATTCACTGGGCGTAAAGGGTGCAGCAGGCGGCCAAGTGTGTTAG  
GCGTGAAAGCCCCGGGGCTTAACCCCGGAATTGCACCTAAACTACATGGCTAGAGCATTG  
GAGAGGGTAGCGGAATTCACGGTGTAGCAGTGAAATGCGTAGATATCGTGAGGAACACCA  
GAGGCGAAGGCGGCTACCTGGACAATTGCTGACGCTCAGGCACGAAAGCGTGGGGAGCAA  
AAGGGATTAGATACCCCTCGTAGTCC  
>Otu5159  
CAGCCTACGGGTGGCTCCAGTGGGGAATATTGCGCAATGGGCGAAAGCCTGACGCAGCAA  
CGCCGCGTGGAAGGATGAAGGTCTTCGGATTGTAAACTTCTGTTAAGTGGGAAGAAAAATC  
CGTTTCTAATACAGACGGTAATGACGGTACCATTAGAGAAAGCACC GGCTAACTTCGTGC  
CAGCAGCCGCGGTAATACGAGGGGTGCAAGCGTTATTTCGGAATTATTGGGCGTAAAGGGT  
GCGTAGACGGCATATTAAGTCAACTGTAAATTCCTCGGCCTAACTGGGGACCAGCGGTA  
GATACTGATGTGCTAGAGGATGGAAGAGAGAAGTGAATTCCTCGGAGTAGCGGTAAAATG  
CGTAGATCTCGAGAGGAACACCGATGGCGAAGGCAGCTTCTTGGTCCATTTCTGACGTTG  
AGGCACGAAAGCGTGGGGAGCAAACAGGATTAGATACCCAGTAGTCC  
>Otu5161  
CCAGCCTACGGGTGCTGCTGCAGCCGAGAATATTCGACAATGGGCGAAAGCCTGATCGAGCG  
ATACCGCGTGATGGATGAAGCGCTTCGGCGCGTAAACATCTTTTATGGAGGAGGAAGTTA  
TTGACGTTACTCCATGAATAAGGGGCTCCTAACTCTGTGCCAGCAGGAGCGGTAATACAG  
AGGCCCCGAGCGTTACCCGGAATTACTGGGCGTAAAGAGTGCGTAGGTGGTTCGTGTTAGT  
CGTCTGTCAAACCCCCGGCTCAACCGGGGATCCGCGGGCGAAACCGGCACGACTTGAGGG  
CGTGAGAGGTACATGGAACCTCATGGTGTAGGGGTGAAATCCGTTGATATCATGGGGAACA  
CCGAAAGCGAAGGCAATGTACTGGCGCGTTCTTGACACTCAAGCACGAAAGCGTGGGTAG  
CGAACGGGATTAGATACCCCGTAGTCC  
>Otu5163  
CCAGCCTACGGGGTGCAGCAGACGAGAATATACCGCAATGGGCGAAAGCCTGACGGAGCG  
ACGCCGCGTGATGGATGAAGTGCTTTGGTACGTAAACATCTTTTATCGGGGACGAAGTTA  
TTGACGGTACCCGATGAATAAGGGGCTCCTAACTGTGCCAGCAGGAGCGGTAATACAG  
AGGCCCCAAGCATTACCCGGAATCACTGGGCGTAAAGGGTGTCAAGGCGGCCATATTAGT  
CTTTCGTAAAATCCGTGGGCTCAACCTACGGCGCGCGAGAGAAACGGTATGGCTCGAGGG  
CGTAAGAGGTGCATGGAACCTCATGGTGGAGGGGTGAAATCCGTTGATATCATGGGGAACA  
CCAAAGGCGAAGGCAGTGCCTGCTTCTGACGCTCACACACGAAAGCCAGGGTAG  
CGAACGGGATTAGATACCCCTAGTAGTCC  
>Otu5167  
CCAGCCTATGGGGGGCTGCAGTCGAGAATATTCGACAATGGACGAAAGTCTGATCGAGCG

ACGCCGCGTGCAGGATGAAGGCCTTCGGGTCGTAAACTGCGGTAGTAGCATAACAATGTA  
AATGAGTGTGCTACGGAAAGAGGTGGGTAACTACGTGCCAGCACCAGCGGTAAAACGTAG  
ACCTCGAGCGTTATCTGGATGTATTGGGCGTAAAGCGCATGTAGGAGGTTTTGTGCGTCT  
TCTGTTAAAGCCCAGGGCCTAACCTGGATCTGCAGGAGATACGACAGAACTAGAGGAGG  
TTAGAGGTGCATGGAACCTACGGTGTAGGGGTGAAATCCGTTGATATCGTGGGGAACACC  
AAAGGCGAAGGCAGTGCCTGGGACCTTCCTGACTCTGATATGCGAAAGCGTGGGGAGCA  
AAAAGGATTAGATACCCGAGTAGTCC

>Otu5168

GCCAGCCTACGGGTGGCTCCAGTCAAGAACTTTCCACAATGGGCGAAAGCCTGATGGAGC  
GACGCCGCGTGGTTGATGAAGTCCTTCGGGACGTAAAGACCTTTTATGGGGGAGGAAGTC  
ATTGACGTTACCCCATGAATAAGGGGCTCCTAACTCTGTGCCAGTAGGAGCGGTAATACA  
GAGGCCCAAGCGTTATCCGGAATCACTGGGCGTAAAGGGTGTGTAGGCGGTCTGTGTAG  
TCGTCTGTGAAAAGACCTTGGGCTTAACCCAGGGGACGCACACGAAACGGCAGACTCAGA  
GGTTGCGAGAGGTATACGGAACCTCATAGTGTAGGGGTGAAATCCTTTGATATTATGGGGA  
ACACCAAATGCGAAGGCAGTATACTGGCGCACACCTGACGCTGAGACACGAAAGCGTGGG  
AATCGAACGGGATTAGAAACCCTAGTAGTCC

>Otu5175

CCAGCCTACGGGGGGCTGCAGTGGGGAATATTGGACAATGGGCGAAAGCCTGATCCAGCA  
ATGCCGCGTGAGTGATGAAGGCCTTAGGGTTGTAAAGCTCTTTCGCCCCGCGACGATAATG  
ACGGTAGCGGGAGAAGAAGCCCCGGCTAACTTCGTGCCAGCAGCCGCGGTAATACGAAGG  
GGGCAAGCGTTGTTCCGAATTACTGGGCGTAAAGGGCGCGCAGGCGGCCAAGGAAGTCAG  
ATGTGAAAGCCCCGGGCTCAACCTGGGAACAGCATTTCGGGACTCTTTGGCTAGAGTTCGG  
GAGAGGTGGGTGGAATTCACAGTGTAGAGGTGAAATTCGTAGATATTGGGAAGAACACCG  
GTGGCGAAGGCGGCTCACTGGACCGATACTGACGCTGAGGCGCGAAAGCGTGGGGAGCAA  
ACAGGATTAGATACCCTAGTAGTCC

>Otu5177

CCAGCCTATGGGTGGCACCAAGTGAGGAATTTTCGTCAATGGGGGAAACCCTGAACGAGCA  
ACGCCGCGTGCAGGAAGAAGGTTTTTCGGATCGTAAACTGCAAATCTCTGGGAAGAGAGAG  
GACGGTACCAGAGGAGAAGCCCCGGCTAACTACGTGCCAGCAGCCGCGGTAAAACGTAGG  
GGGCCAGCGTTGCTCGGAATTACTGGGCGTAAAGGGTCCGTAGGCGGTGCGGCAAGTCGG  
AAGTGAAATCTCTGGGCTTAACCCAGAGGCTGCTCCCGAAACTGCCGTGCTAGAGTGCGA  
GAGAGGCGAGTGGAATTGCGGGTGTAGCGGTGAAATGCGTAGATATCCGCAGGAACATCC  
GAGGCGAAAGCGGCTCGCTGGATCGCAACTGACGCTGAGGGACGAAAGCTAGGGGAGCAA  
ACAGGATTAGAGACCCCAGTAGTCC

>Otu5178

CCAGCCTACGGGGGGCTGCAGTGGGGAATATTGGACAATGGGGGAAACCCTGATCCAGCA  
ATGCCGCGTGTGTGAAGAAGGCCTTCGGGTGTAAAGCACTTTCAGTGGGGAAGAACCAA  
TTCAAGGCTAATACCCTTGAGTCTTGACGTTACCTACAGAAGAAGCACCGGCAAACTCTG  
TGCCAGCAGCCGCGGTAATACAGAGGGTGCAGCGTTAATCGGAATTACTGGGCGTAAAG  
CGCACGTAGGTGGATATTTAAGTCGGAAGTGAAAGCCCTGGGCTTAACCTGGGAATTGCC  
TCCGATACTGGCTATCTAGAGTATGGTAGAGGGTAGTGGAATTTCCGGTGTAGCGGTGAA  
ATGCGTAGATATCGGAAGGAACACCAGTGGCGAAAGCGGCTACCTGGACCAATACTGACA  
CTTAGGTGCGAAAGCGTGGGGAGCAAACAGGATTAGATACCCTTGTAGTCC

>Otu5182

CCAGCCTATGGGTGCGACCAAGTGAGGGAATTTTTCGCAATGGGGGAAACCCTGACGAAGCA  
ACGCCGCGTGAGGATGAAGGCCTTCGGGTCTGTAAACTCCTGTGACCGGGACGAAAGTA  
GTCTGACCCAATACGTCGGGCTATCGACTGTACCGGTGGAGGAAGCCACGGCTAACTCTG  
TGCCAGCAGCCGCGGTAATACAGAGGTGGCAAGCGTTGTTTCGGAATTACTGGGCGTAAAG  
GGCGCGTAGGCGGCCTTTCAAGTCCCCTGTGAAATCCCTCGGCTCAACTGAGGAATTGCA  
CTGGAAGCTGTTTGGCTTGAGTTCGGGAGAGGGAAGCGGAATTCGGGTGTAGCGGTGAA  
ATGCGTAGATATCCGGAGGAACACCGGTGGCGAAGGCGGCTTCCTGGACCGACACTGACG  
CTGAGGCGCGAAAGCTAGGGGAGCAAACGGGATTAGAGACCCTGGTAGTCC

>Otu5186

CCAGCCTATGGGGTGCAGCAGTAACGAATCTTCCGCAATGCACGAAAGTGTGACGGAGCG  
ACGCCGCGTGTAGGACGAAGCCCTTCGGGGTGTAAGTACTGTGAGGGGAAAGAAAGTTC  
TGATCTACCCAGAGGAAGAGACGGCTAACTCTGCGCCAGCAGCCGCGGTAAAGACAGAGG  
TCTCGAGCGTTAGGCGGAATCACTGGGCTTAAAGCGTGTGTAGGTGGATTGTAAAGTACC  
TTGTGAAATCCCACGGCTTAACCGTGGAAGTCTTGGTATACTGCTTATCTTGGGCCATC

TAGGGGTTACCGGAACAAACGGTGGAGCGGTGAAATGCGTAGATAGCGTTTGGAAACGCCA  
ATGGTGAAAACAGGTAACCTGGGGATGTGCCGACACTGAGACACGAAAGCCAGGGGAGCGA  
ACGGGATTAGAAACCCGAGTAGTCC

>Otu5187

CCAGCCTACGGGTCGCTGCAGTAACGAATCTTCCGCAATGCACGAAAGTGTGACGGAGCG  
ACGCCGCGTGTGGGACGAAGCCCTTCGGGGTGTAACCCTGTCAGAGGATAGAAAGTTC  
TGATCATCCTCAGAGGAAGGCACGGCTAACTCTGTGCCAGCAGCCGCGGTAAGACAGAGG  
TGCCAAGCGTTAGGCGGAATCACTGGGCTTAAAGCGTGTGTAGGTGGATCCATAAGTACC  
TTGTGAAATCCCACGGCTTAACCGTGGAACGCTCGGTATACTGCGGATCTTGAGCCAAC  
TAGGGGTTACCGGAACAAATGGTGGAGCGGTGAAATGCGTAGATATCATTTGGAACGCCA  
ATGGTGAAAACAGGTAACCTGGGGTTGTGCTGACACTGAGACACGAAAGCCAGGGGAGCAA  
ACGGGATTAGATACCCGAGTAGTCC

>Otu5188

CCAGCCTATGGGTGGCTGCAGTCGAGGATCTTTGGCAATGGGCGCAAGCCTGACCAAGCG  
ACGCCGCGTGTGCGATGAAGGCCCTTCGGGTGTAAAGCACTGTCGAGGGGGAGGAAGCCG  
CAAGGTTGACCTATCCCTGGAGGAAGGACGGGCTAAGTTCGTGCCAGCAGCCGCGGTAAG  
ACGAACCGTCCAAACGTTGTTTCGGAATCACTGGGCTTAAAGGGCGCGTAGGCGGGCTACC  
AAGTCCGGGGTGAAATCTTTCGGCTTAACCGGAAAACGCTTGGGTACTGGTAGTCTCG  
AGGGAGGTAGGGGTCTGTGGAACGATGGTGGAGCGGTGAAATGCGTTGATATCATCAGG  
AACGCCGGTGGCGAAAGCGACGGACTGGACCTTCACTGACGCTGAGGCGCGAAAGCTAGG  
AGAGCAAACGGGATTAGATACCCCTCGTAGTCC

>Otu5191

CCAGCCTACGGGTCGCACCAGTGGGGAATATTGGACAATGGGCGCAAGCCTGATCCAGCA  
ATGCCGCGTGTGTGAAGAAGGCCCTTCGGGTGTAAAGCACTTTTATCTGGAGCGAAACAC  
GCAAGGTTAATACCTTTGCGGACTGACGGTACCAGAGGAATAAGCACCGGCTAACTTCGT  
GCCAGCAGCCGCGGTAATACGAAGGGTGCAAGCGTTACTCGGAATTACTGGGCGCAAAGC  
GTGAGTAGGTGGTTTCTTAAGTCTGCTGTGAAAGCCCCGGGCTCAACCTGGGAATTGCAG  
TGGATACTGGGGAGCTAGAGCGCGGTAGAGGGTAGTGGAATTCCTGGTGTAGCGGTGAAA  
TGCGTAGAGATCGGGAGGAACACCACTGGCGAAGGCGGCTACCTGGACCAGCACTGACAC  
TGAGTCACGAAAGCGTGGGGAGCAAACAGGATTAGAAACCCCTGTAGTCC

>Otu5192

CCAGCCTATGGGGGGCAGCAGTGGGGAATATTGGACAATGGGGGCAACCCTGATCCAGCA  
ATGCCGCGTGGGTGACGAAGGCCCTTCGGGTGTAAAGCCCTGTCGGTAGGGAAGAAAAAC  
GAGATGGCTAACATCCATTTTGCTTGACGGTACCTGCAAAGGAAGCACCGGCTAACTACG  
TGCCAGCAGCCGCGGTAATACGTAGGGTGCTAGCGTTGTTTCGGAATCATTTGGGCGTAAAG  
CGCGTGTAGGCGGCTATTTAAGTCGAGTGTGAAATCCCTAGGCTTAACCTAGGAAGTGCA  
TTCGAAACTAACTAGCTGGAAGACGGTAGAGGAAGGTAGAATTCTAGTGTAGAGGTGAA  
ATTCGTAGATATTAGGAGGAACACCGGTGGCGAAGGCGGCCTTCTGGACCGTTCTTGACG  
CTGAGACGCGAAAGCGTGGGTAGCAAACAGGATTAGATACCCCGGTAGTCC

>Otu5193

CCAGCCTACGGGTGGCACCAGTGGGGAATATTGGGCAATGGGCGCAAGCCTGACCCAGCC  
ATGCCGCGTGAGTGATGAAGGCCCTTCGGGTGTAAAGCTCTGTGGGGAGGGAAGAACAAG  
CTTGTGGCTAATATCCACGAGCCCTGACGGTACCTCCTTAGCAAGCACCGGCTAACTCCG  
TGCCAGCAGCCGCGGTAATACGAGGGTGCAAACGTTGCTCGGAATTATTGGGCGTAAAG  
CGCACGTAGGCGGCCGACTAAGTCGGGTGTGAAAGCCAGGGCTTAACCTGGAAGTGCA  
CTCGAACTGGTCGGCTTGAATATGGAAGAGGGTCGCGGAATTCCCGGTGTAGAGGTGAG  
ATTCGTAGATATCGGGAGGAACACCACTGGCGAAGGCGGCGACCTGGGCCAATATTGACG  
CTGAGGTGCGAAAGCGTGGGGAGCAAACAGGATTAGATACCCGAGTAGTCC

>Otu5195

CCAGCCTATGGGATGCACCAGTATCTCAAGAAATACTTTAAGCTCGTTATCCTTTTGAAC  
GTGGACAACGAGACTTTTCTGGCGAGCAATCGCCGCGCGCAGGTGCAATTCGACGCGATC  
TACACGGCGGAAGACATCGGATCGTACAAGCCTTCTTCACGCAATTTGCACTACATGATC  
GAGAAGCTGGAAGGAAACGGAGTGGAGAAGGCAAAGATTCTGCACACCGCCGAGAGCATG  
TTTCACGATCACAAAGCCGGCAAACGATCACGGTCTTAAGTCGTGCTGGATCTATCGTCGC  
CATGACAAACAGGGTTTTCGGAGCAACCATGAATCCCGGCCAACTGCCGCATGTTGATTTT  
AGGTTCAACAGCATGCACGAGCTCGTGAAGACGCATCAGGAGCAGTTGCGGGTTAAATGA  
CAACATCGGCTACCCAATTAGAAACCCCTGTAGTCC

>Otu5196



CCAGCCTATGGGAGGCTCCAGTCGAGGATTTTTCTCAATGGGGGAAACCCTGAAGGAGCG  
ACGCCGCGTGAGGGATGAAGGTCCTTCGGATTGTAAACCTCTGTCATCTGGGAACAAAGCG  
CTCCACCTAACACGTGGATTGTTGATAGTACCGGAAGAGGAAGCAGTGGCTAACTCTGTG  
CCAGCAGCCGCGGTAATACAGAGACTGCAAGCGTTGTTTCGGATTTCATTGGGCGTAAAGGG  
TGCGCAGGCGGTCCGGTAAGTTGGATGTGAAATACCATGGCTTAACCATGGAGGGTCATT  
CAAACTGCCGGGCTAGAGGACTGGAGAGGAGACTGGAATAGTCGGTGTAGCGGTGAAAT  
GCGTAGAGATCGACTAGAACACCGGTGGCGAAGGCGAGTCTCTGGACAGTTCCTGACGCT  
CAGGCACGAAAGCCAGGGGAGCAAACGGGATTAGATACCCCCGTAGTCC

>Otu5198

CCAGCCTACGGGACGCACCAGTAAGGGATATTGCGCAATGGGCGAAAGCCTGACGCAGCA  
ACGCCGCGTGAGGATGACGGTTTTTCGGATTGTAACTCCTTTTTGAAGGGACGAGGAAG  
GACGGTACCTTCAGAATAAGTCACGGCTAACTACGTGCCAGCAGCCGCGGTAAACGTAG  
GTGGCGAGCGTTATCCGGATTTACTGGGTGTAAAGCGTGTGCAGGCGGTCTGTTAAGTGG  
TGTATGAAATCGTTCGGCTCAACCGAGCGGGGTATGCCAGACTGACAGACTAGAGGGGG  
TGAGAGGGGCATGGAATTCCGGGTGTAGTGGTGAATGCGTAGAGATCCGGAGGAACCCC  
AGAGGCGAAGGCGGTGCCCTAGCACCCCCCTGACGCTCAGACACGATAGCATGGGGAGCG  
AACGGGATTAGATACCCCCGTAGTCC

>Otu5204

CAGCCTATGGGGGGCTCCAGCAACGAATCTTCCCCAATGCCGGAACGGTGAGGGAGCGA  
CGCCGCGTGAAAGGACGAAGTCTTCGGAATGTAACTTCTAAAGGGGTATGAAAGATCA  
GCGCCTAATACGCGCAAAGTTTGATCAGATCCTGATAAGGGGCGGCTAACTCTGTGCCAG  
CAGCCGCGGTAATACAGAGGCCCAAGCGTACTGAGAATCACTGGGTTTAAAGGGTGCG  
TAGGTGGCGCGTTAAGTCCGTTGTGAAATCCCTGGGCTCAACCCAGGAACGCTTCGGAT  
ACTGGCGCGCTTGAGGCCGGTAGGGGTCACTGGAACGACGGTGGAGCGGTGAAATGCGT  
AGATATCGTCAGGAACGCCGATGGTGAAGACAGGTGACTGGGCCGGAACGACACTGAGG  
CACGAAAGCGTGGGGAGCGAACGGGATTAGATACCCTAGTAGTCC

>Otu5205

CCAGCCTACGGGGTGACAGCAGTGAGGAATATTGCGCAATGGGCGAAAGCCTGACGCAGCG  
ACGCCGCGTGAGGATGAAGGTCCTTCGGATTGTAACTTCTGTAAAGTGGGAAGAAAATC  
GGGGTTTTTAATAGAGCCCTAAAATGACGGTACCCTAGAGAAAGCACCCGGCTAACTTCGT  
GCCAGCAGCCGCGGTAATACGAAGGGTGCGAGCGTTATTCGGATTTATTGGGCGTAAAGG  
GTGCGCAGGCGGTGCGTTAAGTCAACTGTAAATCTCCCGACCTAACCGGAATCAGCGG  
TAGATACTGGCGCGCTAGAGGGTGAAGAGAGAAGTGAATTCCTTGAGTAGCGGTGAAA  
TGCGTAGATCTCAAGAGGAACACCGATGGCGAAGGCAGCTTCTTGGTCCACATCTGACGC  
TCATGCACGAAAGCGTGGGGAGCAAACAGGATTAGATACCCGCGTAGTCA

>Otu5209

CCAGCCTATGGGACGCAGCAGTCGAGAATTTTTCTCAATGGGGGAAACCCTGAAGGAGCG  
ACGCCGCGTGAGGATGAAGGTCCTTCGGATTGTAACTTCTGTCAATTAGAGAACAATTGT  
CATCGAGTAACTATCGGTGGCTTGATAGTATCTGAAGAGGAAGAGACGGCTAACTCTGTG  
CCAGCAGCCGCGGTAATACAGAGGTCTCAAGCGTTGTTTCGGATTTCATTGGGCGTAAAGGG  
TGCGTAGGTGGCGGGGCAAGTTGGATGTGAAATCCCGGAACCTAACTCCGGAACGTCATT  
CAATACTGCCTTGCTGGAGTACTGGAGAGGAGATTGGAATTTACGGTGTAGCAGTGAAAT  
GCGTAGATATCGTAAGGAAGACCAGTGGCGAAGGCGGATCTCTGGACAGTTACTGACACT  
GAGGCACGAAGGCCAGGGGAGCAAACGGGATTAGAAACCCAGTAGTCC

>Otu5210

CCAGCCTACGGGGCGCACCCAGTCGAGAATATTCACAATGGGGGAAACCCTGATGGAGCG  
ACACCGCGTGGTGGATGAAGGTCCTTCGGATTGTAAACACCTTTTGCACGGGACGAAGCGT  
AAGCTGACGGTACCGTGAGAATAAGAGGTTGCTAACTCTGTGCCAGCAGCAGCGGTAATA  
CAGAGACCTCGAGCGTTATCCGGATTTACTGGGCGTAAAGCGTCCGTAGGCTGTTTGGTA  
AGTCATCTGTCAAATCCCAGTGCTCAACATTGGGGCTGCGGGTGATACTGTCAAACCTAGA  
GGATGGAAGAGGCAAGGGGAACGCGCGGTGTAGTAGTAAATGCGTTAATATCGGCAGGA  
ACACCAAAGGCGAAGGCACCTTGCTAGGACATTCTGACACTCAAGGACGAAAGCGTGGG  
GAGCAAACGGATTAGAACCCTAGTAGTCC

>Otu5212

CCAGCCTATGGGACGCTGCAGTTGGGAATCTTCTGCAATGCGCGCAAGCGTGACAGAGTG  
AACCAAAGTGTTCTTTTTTTAAGAACTTTTGCCAGCTGTAAAAAGGCTGGCGAATAAG  
GACTGGGCAAGATCGGTGCCAGCCGCCGCGGTAATCCCGACAGTCCGAGTCGCAGCCACA  
ATTATTGGGTCTAAAATATCCGTAGCTTGCTAAAGAAGTCTCCTGTGAAATCCAGCATCT

TAAGTGTGGGCGTGCAGGAGATACTCTTTGGCTAGAGACTGGAAGGCGTAAGAAGTACA  
TTCGGGGTAGTGGTAAAATATTTTAATCCCGAGTGGACTGACAGTCGCGAAGGCGTCTTA  
CGAGGACAGTTCTGACAGTGAGGGATGAAGGCTAGGGGCGAAAAGGGATTAGATACCCC  
CGTAGTCC

>Otu5213

CCAGCCTATGGGTGGCTGCAGTCGAGAATCTTCCGCAATGGACGAAAGTCTGACGGAGCG  
ACGCCGCGTGGAGGATGAAGTTCTTCGGAATGTAAACTCCTTTTGCCAGGGAAAAAGTTA  
TTGATTGTACCTGGAGAATAAGAAGTTGCTAAACTCGTGCCAGCAGCAGCGGTAATACGA  
GTGCTTCAAGCGTTATCCGGAATCATTGGGCGTAAAGGGTGTGTAGGCGGTTCTGTTAGT  
CTTGCGTAAAATCTCTCGGCTCAACCGAGAACTCGCGCAGGAAACGGCAGAACTTGAGGA  
CGGAAGAGGTCTCTGGAACCTAGGTGTAGCGGTGAAATGCGTTGATATCTAGGGGAACA  
CCAAAAGCGAAGGCAAGAGACTAGTCCGCTCCTGACGCTGAAACACGAAAGCGTGGGTGC  
CGAATGGGATTAGATACCCTCGTAGTCC

>Otu5214

CCAGCCTACGGGAGGCTCCAGTGGGGAATATTGGACAATGGGCGAAAGCCTGATCCAGCC  
ATGCCGCGTGAGTGATGAAGGCCTTAGGGTTGTAAAGCTCTTTTGCGGGGACGATAATG  
ACGGTACCCGCGAGAATAAGCCCCGGCTAACTACGTGCCAGCAGCCGCGGTAACACGTAGG  
AGACGAGCGTTATCCGGATTTACTGGGCGTAAAGCGCGTGACGGCGGTTTGGTAAGTTGG  
ATGTGAAAGCTCCCGGCTTAACTGGGAGAGGTCGTTCAATACTGCCAGACTAGAGGATGG  
TAGAGGGAGGTGGAATTCTGGGTGTAGTGGTGAAATGCGTAGATATCCAGAGGAACACCA  
GTGGCGAAAGCGGCCTCCTGGACCATTCTGACGCTCATACGCGAAAGCTAGGGTAGCAA  
ACGGGATTAGAGACCCGAGTAGTCC

>Otu5215

CCAGCCTACGGGTTCGAGCAGTGAGGAATATTGCGCAATGGGGGCAACCCTGACGCAGCA  
ACGCCGCGTGAGTGAGGAAGGTTTTCGGATTGTAAAGCTCTGTGAGCGGAAAGAAATGC  
ATTATGGCTAATATCCATAATGTTTGACGGTACCGCTAAAGGAAGCGCCGGCTAACTCCG  
TGCCAGCAGCCGCGGTAATACGAAGGGGGCTAGCGTTGTTTCGGAATCACTGGGCGTAAAG  
CGTACGCAGGCGGATTGATAAGTCAGGGGTGAAATCCCGGAGCTCAACTTCGGAATTGCC  
TTTGATACTGTCTATCTTCGAGTTCGGGAGAGGTTGGCGGAATTCCTAGTGTAGAGGTGA  
AATTCGTAGATATTAGGAAGAACACCAGTGGCGAAGGCGGCCAACTGGCCCCGATACTGAC  
GCTCATGTACGAAAGCGTGGGGAGCAAACAGGATTAGAGACCCTAGTAGTCC

>Otu5217

CCAGCCTACGGGGGGCTGCAGTCGAGGATCTTTCTCAATGGGGGAAACCCTGAAGATGCG  
ACGCCGCGTGAGGGATGAAGGCCTTCGGGTCGTAAACCTCTTTTAACAGGGAGGAATGCT  
GTAGAGTGAATAACTCTGCAGATTGACTGTACCTGTGGAATAAGCCACGGCTAACTCTGT  
GCCAGCAGCCGCGGTAATACAGAGGTGGCAAGCGTTACTCGGTTTGAAGTGGGTGTAAAGG  
GTCCGCAGGCGGCTTTACAAGTAGAAAGTGAAATCCTTCAGCTTAACTGAAGAACTGCTT  
TCTAAACTGTTTAGCTTGAGGATGGGAGAGGATAACGGAACCTGCAGGTGTAAAGGTGAAA  
TTTGTGGATATCTGCAGGAACGCCAGTGGAGAAGTCGGTTATCTGGTCCATTCCTGACGC  
TCAGGGACGAAAGCTAGGGGAGCAAACAGAATTAGATACCCGAGTAGTCC

>Otu5218

CCAGCCTATGGGAGGCTCCAGTCGAGGATTTTTCTCAATGGGGGAAACCCTGAAGGAGCG  
ACGCCGCGTGGGGGATGAAGGTCTTCGGATTGTAAACCCCTGTCATCTGAGAACAAAGTG  
ATCTACCCAATACGTGGATTATTGATAGTACCGGAAGAGGAAGCCGTGGCTAACTCTGTG  
CCAGCAGCCGCGGTAATACAGAGACGGCAAGCGTTGTTTCGGAATTCATTGGGCGTAAAGGG  
TGCGCAGGCGGTTCGGCCAAGTCTGATGTGAAAGCTCGCAGCCTAACTGCGAAATGGCGTC  
GGAACTAGCCGACTAGAGGACTGGAGAGGAGACTGGAATTGTCGGTGTAGCGGTGAAAT  
GCGTAGAGATCGACAAGAACACCGGTGGCGAAGGCGGGTCTCTGGACAGTTCCTGACGCT  
CAGGCACGAAAGCCAGGGGAGCAAACGGGATTAGATACCCGAGTAGTCC

>Otu5224

CCAGCCTACGGGGTGCAGCAGTTTGGAATTTTGGACAATGAGCGAAAGCCTGATCCAGCG  
ACGCCGCGTGACGATGAAGGCCTTCGGGTGTAAAGTCCTTTTGCTCGGGAACAATTTT  
TGAGCGTACCGAGAGAATAAGAGGTTGCTAACTCTGTGCCAGCAGCAGCGGTAATACAGA  
GACCTCAAGCGTTATCCGGAATCATTGGGCGTAAAGCGTACCGATAGGTGGTTTGTAGTGTG  
TCAGAAGTGAAATCTTCAGGCTTGACCTGGAGAATGTCTTTTGAACTACTAACTAGAG  
GGGCAAAGAGGAAGCTGGAACGAACGGTGTAGTAGTGAAATGCGTTGATATCGTTTCGGAA  
CACCAATTAGCGTAGGCAGGCTTCTGGGTGCCACCTGACACTGCTAGGACGAAAGCGTGG  
GGAGCGATAAGGATTAGATACCCTAGTAGTCC

>Otu5227

CCAGCCTACGGGATGCTGCAGCTAAGAATCTTCCGCAATGGGGGAAACCCTGACGGAGCG  
ACGCCGCGTGATGATGAAGGCCGTAAGGTTGTAAATCCTTTTGTCTGGTGAAGAATAAC  
ACAAGGAGTGGAAGCCTTGTGGATGACGTTAGCCGACGAATAAGCCCCGGCTAATTACG  
TGCCAGCAGCCGCGGTAATACGTATGGGGCAAGCGGTGTTTCGGAATTACTGGGCGTAAAG  
GGCACGTAGGCGGCTTTGTAAAGCCGGCGTGGAAGCCACGGCTCAACCGTGGGATTGCG  
TTGGGAAGTGCAGGCTTGAATCATGGAGAGGGAGCTAGAATTCCTGGTGTAGGGGTGAA  
ATCTGTAGAGATCAGGAAGAATACCAGTGGCGAAGGCGAGCTCCTGGCCAATGATTGACG  
CTGAGGTGCGAAAGTGTGGGGATCAAACAGGATTAGAAACCCTAGTAGTCC

>Otu5230

CCAGCCTACGGGGCGCAGCAGGGAATTTTGCACATGGGCGAAAGCCTGACGCAGCAACA  
CCGCGTGAGGGAAGACAGCCTTCGGGTGCTAAACCTCTTTTATCAGGGAAGAATAATGAC  
GGTACCTGATGAATAAGTCACGGCTAACTACGTGCCAGCAGCTGCGGTAATACGTAGGTG  
GCGAGCGTTATCCGGATTCAATTGGGCGTAAAGAGCGCGTAGGTGGTCTTCAAGTCAGAT  
GTTAAATCTCTCGGCTTAACTGGGAGTTGTCATCTGATACTGCTGGACTTGAGGGCGGTA  
GAGGGAGGTGGAATTCCTGGTGTAGTGGTGAAATGCGTAGATATCGGGAGGAACACCAGT  
GGCGAAAGCGGCCTCCTAGGCCGTTCTTGACACTGAGGCGCGAAAGCGTGGGGAGCGAAC  
AGGATTAGATACCCGGTAGTCC

>Otu5236

CCAGCCTACGGGGCGCTGCAGTGGGGAATTTTGCACAATGCCCCGAAAGGGTGATGCAGCA  
ACGCCGCGTGAGGGATGAAGGTCCTCGGATCGTAAACCTCTTTCGATCGGGAAAAATGGG  
CGGGCGAACAACCCGTTCTGATGGTACCGGAAGAAGAAGCCCCGGCTAACTACGTGCCAG  
CAGCCGCGGTAACACGTAGGGGGCGAGCGTTGTTTCGGAATTACTGGGCGTAAAGGGCGTG  
TAGGCGGTGCGGCAAGTCGGGCGTGAAATCCCCGGGCTTAACCCGGGGCGGTGCTTCGAA  
ACTGCCGTGCTAGAGTGTGGGAGAGGGAAGTGGAATTCCTGGTGTAGCGGTGAAATGCGT  
AGATATCGGGAGGAACACCTGCGGCGAAGGCGGCTTCCTGGACCATAACTGACGCTGAGG  
CGCGAAAGCTAGGGGAGCAACAGGATTAGAGACCCGAGTAGTCC

>Otu5240

CCAGCCTACGGGGCGCAGCAGTGGGGAATATTGGACAATGGGCGCAAGCCTGATCCAGCC  
ATGCCGCGTGAGTGAAGAAGGCCTTCGGGGTGTAAGCTCTTTCGGCAGGGACGATAATG  
GCGGTACCTGCAGAAGAAGCTGCGGCTAACTACGTGCCAGCAGCCGCGGTAATACGTAGG  
CAGCAAGCGTTGTTTCGGAATTACTGGGCGTAAAGAGTGCGTAGGCGGTTTGGCAAGTTTCG  
GTGTGAAATCTCCCGGCTTAACTGGGAGGGTGCGCCGAAAACCTGCCAGACTAGAGTGTGG  
GAGAGGGAAGTGGAATTCCTGGTGTAGCGGTGAAATGCGTAGATATCAGGAGGAACACCT  
GCGGTGTAGACGGCTTCCTGGACCACTACTGACGCTGAGGCACGAAAGCGTGGGGAGCAA  
ACAGGATTAGATACCCTCGTAGTCC

>Otu5242

CCAGCCTACGGGATGCACCAGTCGAGAATCTTCGGCAATGGGCGCAAGCCTGACCGAGCG  
ACGCCGCGTGCGGGATGGAGGCCTTCGGGTGTAAACCGCTGTCAGAGGGGAGGAAATGC  
CGGTGGGTTCTCTCATCGGTTTGACCTATCCTCAGAGGAAGGACGGGCTAAGTTTCGTGCC  
AGCAGCCGCGGTAAGACGATCCGTCCAAACGTTATTTCGGAATCACTGGGCTTAAAGGGTG  
CGTAGGCGGTCCGGGAAGTTGGGTGTGAAAGCCCTCAGCTCAACTGAGGAATTGCGCCCA  
AAACTGCCGGACTTGAGGGAGACATAGGTGAGCGGAACTTAGGGTGGAGCGGTGAAATGC  
GTTGAGATCCTAAGGAACACCAGTAGCGAAAGCGGCTCACTGGGTCTCTTCTGACGCTGA  
TGCACGAAAGCTAGGGGAGCGAACGGGATTAGATACCCTCGTAGTCC

>Otu5243

CCAGCCTACGGGTGGCAGCAGTAGGGAATATTGGGCAATGGGCGAAAGCCTGAAGGGGCG  
ACGCCGCGTGCGGGATGAAGGGCTTCGGCCGTAACCCCTGTCATTTCGCGAACAAACCC  
TGCGATTTAATAGATCGCAGGCTGATTGTAGCGGAAGAGGAAGGGACGGCTAACTCTGTG  
CCAGCAGCCGCGGTAATACGGAGGTCCCAAGCGTTGTTTCGGAATCACTGGGCGTAAAGGG  
TGCGTAGGTGGCAGGGTAAGTTTGATGTGAAATCTCCGGGCTTAACCCGGAACGGCATT  
GAATACTCTCCTGCTCGAGGGTTGGAAGGGGGACTGGAATACTTGGTGCAGCAGTGAAAT  
GCGTAGATATCAAGTAGAACACCAGTGGCGAAGGCGAGTCCCTGGACAACCTGACACT  
GAGGCACGAAAGCTATGGGAGCAAACAGGATTAGATACCCTTGTAGTCC

>Otu5245

CCAGCCTACGGGGGGCACCAAGTGAAGGAATTTTCCGCAATGGGCGAAAGCCTGACGGAGCG  
ACGCCGTGTGGGTGATGAAGGCCTTCGGGTCTTAAAGCCCTGTCAGCGATGACGATATTG  
ACGGTAATCGCAGAGGAAGCCCCGGCTAACTACGTGCCAGCAGCCGCGGTAATACGTAGG

GGGCGAACGTTGTCCGGAATTATTGGGCGTAAAGCGCATGTAGGCGGTTCTATAAGTCAG  
GTGTAAATCCCCCGGCTCAACCGGGGTTTCGCACTTGATACTGTAGGGCTTGAGAGATAT  
AGAGGAAAGCGGAACTTCAGGTGTAGCGGTGAAATGCGTAGATATCTGAAGGAACACCAG  
TGCGGAAGGCGGCTTTCTGGATATTTTCTGACGCTGAGATGCGAAAGCAAGGGGAGCAAA  
CGGATTAGATAACCGAGTAGTCC

>Otu5247

CCAGCCTACGGGATGCTCCAGTAGGGAATATTGCTCAATGGGGGAAACCTGAAGCAGCA  
ACGCCGCGTGAGTGATGAAGGCCTTCGGGTCGTAAAGCTCTGTTGTACGGGGCGAATGCC  
GTCATGGCTAATATCCATGGCGAGTGACAGTACCGTATAAGAAAGGACCGGCTAACTTCG  
TGCCAGCAGCCGCGGTAAGACGGGGGGTCCAAGCGTTGTTTCGGAATCATTTGGGCGTAAAG  
CGTGTGCAGGTGGTTTTTGTAAAGTTGGATGTGAAAGCCCCGGGCTTAACCCGGAAGTGCA  
TTCAAACTGCAAACTTGAGTATGGAAGAGGGTCTGTGGAATTCCAGGCGTAGTGGTGAA  
ATACGTAGATATCTGGAGGAACACCGGTGGCGAAGGCGGCGACCTGGTCTTATACTGACA  
CTCATACACGAAAGCGTGGGGATCAAACAGGATTAGATAACCGCGTAGTCC

>Otu5250

CCAGCCACGGGGGGCAGCAGTGAGGAATATTGGTCAATGGACGCAAGTCTGAACCAGCCA  
TGCCGCGTGGAAGGATGAAGGCCCTATGGGTTGTAACTTCTTTTATACGGGACGAATCTC  
CCGCTCGTGAGCGGGATTGACGGTACTGTACGAATAAGCAACGGCTAACTCCGTGCCAGC  
AGCCGCGGTAATACGGAGGTTGCAAGCGTTATCCGGATTTATTGGGTTTAAAGGGTGCGT  
AGGCGGACTTATAAGTCAGTGGTGAATCTCGTTGCTTAACAACGAACGTGCCATTGATA  
CTGTAGGTCTTGAGTACAGATGCCGTTGGCGGAATGTGTCTATGTAGCGGTGAAATGCATA  
GATATGACACAGAACACCGATTGCGAAGGCAGCTGACGAACTGTAACTGACGCTGAGGC  
ACGAAAGCGTGGGGACCAAACAGGATTAGAAACCCAGTAGTC

>Otu5257

CCAGCCTATGGGAGGCACCAGTGGGGAATCTTGGACAATGGGCGCAAGCCTGATCCAGCA  
ATGCCGCGTGGGTGAAGACGGCCTGCGGGTTGTAAAGCTCTGTGGGGAGGGACGAATAAG  
GGTTGGCTAATATCCAATCTGATGACGGTACCTCCTTAGCAGGCACCGGCTAACTCTGTG  
CCAGCAGCCGCGGTAAGACAGAGGGTGCAAACGTTGTTTCGGAATCACTGGGCGTAAAGCG  
CGTGTAGGCGGCTACGTAAGTCGGACGTGAAAGCCACGGCTCAACTGTGGAAGTGCGCT  
CGAAACTGTGTAGCTTGAGTCTTGGAGAGGAAGGCGGAATACTTGGTGTAGAGGTGAAAT  
TCGTAGATATCAGGTAGAACACCAGTGGCGAAGGCGGCCTTCTGGACAATGACTGACGCT  
GAGACGCGAAAGCGTGGGGAGCAAACAGGATTAGATAACCCCTGTAGTCC

>Otu5258

CCAGCCTACGGGTGGCACCAGTGGGGAATCTTGCACAATGGGGGAAACCTGATGCAGCG  
ACGCCGCGTGAGCGATGAAGCCCTTCGGGGTGTAAAGCTCTTTCGTCAGGGAAGATAGTG  
ACGGTACCTGGAGAAGCAGCTGCGGCTAACTACGTGCCAGCAGCCGCGGTAATACGTAGG  
CAGCGAGCGTTGTTTCGGAGTTACTGGGCGTAAAGGGTGTGTAGGCGGTTGTTTAAAGTTG  
GTGTGAAACCTCCCGGCTCAACTGGGAGGGTGCGCCGAGGACTGGAGAGCTTGGAGTGCG  
GGATGGGAGAGTGGAATTCCCGGTGTAGCGGTGAAATGCGTAGATATCGGGAGGAACACC  
TGTGGTGTAGACGGCTCTCTGGACCGTAACTGACGCTGAAACACGAAAGCGTGGGTAGCA  
AACAGGATTAGATAACCCCTGTAGTCC

>Otu5262

CCAGCCTACGGGGGGCAGCAGTGGGGAATTTTGGACAATGGGCGAAAGCCTGATCCAGCG  
ACGCCGCGTGAGGATGAAGGCCTTCGGGTTGTAACTCCTTTTGGAGGGGACGAAATAA  
ATGACGGTACCCCTCAGAAAAAGCCACGGCTAACTACGTGCCAGCAGCCGCGGTAATACGT  
AGGTGGCGAGCGTTACTCGGATTTACTAGGCGTAAAGCGCTTGCAGGTGGTTGGATAAGT  
CCGTAGTGAAATTTCCCGGCTTAACTGGGAAGGGTCTACGGAACTATTCCGGCTTGAGTG  
TGGGAGGGGTGGACGGAATTCCAGGTGTAGCGGTGAAATGCGTAGATATCTGGAGGAACA  
CCGATGGCGAAAGCGGTCCACTGGCCCAATACTGACACTGAGGAGCGAAAGCTAGGGGAG  
CAAACAGGATTAGATAACCCCGTAGTCC

>Otu5267

CCAGCCTACGGGTGGCAGCAGTGACGAAATCTGGACAATGCGCGAAAGCGTGATCTGGTA  
ATACCTCTCAAGTGATGACGGTCAAGCGATTGTAAACTTTGTATGTTAACTAAATAATG  
ACACGGTTAATTAGGAAAAAGTCTTGCCAACTCTGTGCCAGCAGCCGCGGTAATACAGA  
GGGGGCAAGCATTATTCTTACTGGGCGTAAAGGGTGTGTAGGTGGTCAACTTTATT  
ATACGGTAAAGCCTGGGGTTATACTCAGAAAGCTGTGTTAATATTAGTTAGACTTGAGTTT  
ATGTGTGGTTATTAGAATTTTTGGTGGAGCAGTAAATGCTTAGATACTACAAGGAATAC  
CGAAGAGCGAAGGCGATTAAACAGCATTAACCTGACACTGAGGCACGAAGGCATGGGGAG

CAAACAGGATTAGATACCCTAGTAGTCC

>Otu5271

CCAGCCTACGGGTGGCACCAGTGAGGAATATTGGACAATGGGCAAACGCTTGATCCAGTA  
ATAATTCATGAGTGAGGAAAGGAAAGCAGTAACGCTGTAAAACTCGAATAATAATAAAAA  
TAATGATATTTTTTATAAAAAGCACTGGCTAATTCCGTGCCAGCAGCCGCGGTAAGACAG  
GTAGTGCAGACGTTATTTCATTTTGATTAGGTGTAAAGGATATGTAGATTGCTTTGTTTTG  
AATATTTTCTAAAAATTTCGAAGTGTAGTTCTTCGAAATGGAAAATTTACTCAAAAGCTAG  
AGTTTGTGGTATGTTAAAAGAATTTTTTTTGTAAAGGGTAGAATCTCTAAATAATTAAAAG  
ACTACCAAGATAGTTGTGAAAACATTTTTTCAGATCCAAACTGACATTGAGATATGAAAGT  
ATGGGAATCAAACAGGATTAGATACCCCAGTAGTCC

>Otu5272

CCAGCCTATGGGGGGCTCCAGTCTAGAAAAATTGGGCAATGGGCGCAAGCCTGACCCAGCG  
ACGCCGCGTGAGGATGAAGATCTTCGGGTGTAAACTCCTGTCAGGCGGAACGATGCCT  
TGTGCTCTAACTAAGCACAAGGTGACGGTACTGCCAAAGGAAGCCCCGGCTAACTACGTG  
CCAGCAGCCGCGGTAAGACGTAGGGGGCGAGCGTTGTCCGGAATTACTGGGCGTAAAGGG  
TGTGTAGGCGGTCTTGTAAGTCAGCAGTGAAAGCTCCGGGCTAAACTCGGAAACGGTTGC  
TGATACTACCGGACTTGAGGGCAGGAGAGGAGGTTGGAACTTTCGGTGTAGCGGTAGAAT  
GCGTAGATATCGAAAGGAACGCCGATAGCGAAGGCAAGCCTCTGGAATGTTCTGACGCT  
GAAACACGAAAGCTGGGGGAGCAAACAGGATTAGAAACCCCCGTAGTCC

>Otu5275

CCAGCCTATGGGGCGCAGCAGTGGGGAATTTTTCGCAATGGGGGAAACCTGACGCAGCA  
ACGCCGCGTGGAAGATGAAGCCCCCTTGGGGCGTAAACTCCTTTTCGACCGGGACGATTATG  
ACGGTACCGGTGGAAGAAGCACCGGCTAACTCTGTGCCAGCAGCCGCGGTAATACAGAGG  
GTGCGAGCGTTGTTCCGAATTATTGGGCGTAAAGCGCGTGTAGGCGGTTTGGTAAGTCTT  
TTGTGAAATCTATGGGCTCAACTCATAGACTGCAAGGGAAACTGCCGGGCTTGAGTGTGG  
GAGAGGTGAGTGGAATTTCCGGTGTAGCGGTGAAATGCGTAGATATCGGAAGGAACACCT  
GTGGCGAAAGCGGCTCACTGGACCACAACCTGACGCTGATGCACGAAAGCTAGGGGAGCAA  
ACAGGATTAGAAACCCAGTAGTCC

>Otu5284

CCAGCCTATGGGGTGCTGCAGTGAGGAATTTTGGACAATGAACGAAAGTTTGATCCAGCA  
ATATCGCGTGAGTGATAATTTAGTAAATTAGTTAATAGACTAATTTATAGAAGGTTAAAT  
CCGTAAAACTCTTTCATTATTGATGAAAAAGACAGTAAATAAAAAAGAAGTCCCGACTAA  
CTTCGTGCCAGCAGTCGCGGTAATACGGAGGGGGCAAGCGTTATTACCTTGACTGGGCG  
TAAAGGGTATGTAGATGGTTTTTAAATGTTTAAATAAGTAATCCAAGCTTAACTTTGAAG  
TTATTTTAAAAACAATAAAACTAGAGTTTTTGGAAAGTAGGTTACATTTTAAATGCATAG  
GTGAAATTATTTTATATTAAAGAGATATCCAGAAAGCGAAAGCGACCTACTAGATTTTTC  
CTGACATTGAGGTACGAAAGCATGGGGATCAAACAGGATTAGAGACCCTTGATGTCC

>Otu5286

CAGCCTATGGGAGGCTCCAGTGAGGAATCTTCCACAATGGGCGAAAGCCTGATGGAGCAA  
CGCCGCGTGAGGATGAAGGCCCTCGGGTCGTAAACTGCTTTTATAAGTGAAGAATATGA  
CGGTAGCTTATGAATAAACACCGGCTAACTACGTGCCAGCAGCCGCGGTCATACGTAGGG  
TGCAAGCATTATCCGGATTTACTGGGCGTAAAGCGCGTGCAGGCGGTTTGGTAAGTTGGA  
TGTGAAAGCTCCTGGCTTAACTGGGAGAGGTCGTTTCACTACTGCCAGACTAGAGGATGGT  
AGAGGGAGGTGGAATTCTGGGTGTAGTGGTGAAATGCGTAGATATCCAGAGGAACACCAG  
TGCGGAAAGCGGCCTCCTGGACCATTCTGACGCTCATACGCGAAAGCTAGGGTAGCAAA  
CGGGATTAGAGACCCGAGTAGTCC

>Otu5291

CCAGCCTATGGGAGGCTGCAGTGGGGAATATTGGACAATGGGGGAAACCTGATCCAGCA  
ATGCCGCGTGAAATGATGAAGGCCCTCGGGTGTAAAGTTCTTTTACCCGAGACGATAATG  
ACGGTATCGGGAGAATAAGCACCGGCTAACTTCGTGCCAGCAGCCGCGGTAATACGAAGG  
GTGCAAGCGTTGTTCCGAATGACTGGGCGTAAAGGGCGCGTAGGCGGTTTCGGTACGTTTG  
ATGTGAAAGCCCCGGGCTCAACCTGGGAATTGCATCGAATACGGCCGAGCTTGAGTGCGA  
GAGAGGAAAATGGAATAGTGCGTGTAGAGGTGAAATTCGTAGATATGCACTAGAACACCA  
GAGGCGAAGGCGATTTTCTGGCTCGTAACTGACGCTGAGGCGCGAAAGCGTGGGGAGCAA  
ACAGGATTAGAGACCCGAGTAGTCC

>Otu5294

CCAGCCTACGGGGTGAGCAGCGGATTAAACCTCAAGCAGATCGTCGGCACGGGGTTCGAAG  
TCCGATCAGACCGCTGATAATGAGATCGCAGTAGGTTCGAGTGGTTGTAGTCTTTTCTCTCG

TTCCCGAATTTGGAAACCCCGTTTCTGGAGCAAGCTGCGCGCGATCCAGTCCCCGTTTCGT  
CGGATTGATATCCTCGTCGATCCACGGCACCCTCGGCCATCTCCAAGTTGGAGATGCTG  
AGATTTGGTATAGATCTTTAGGAGTTTAAAGTAGTCACTGGAGGAAATAATCTTTTGATC  
GCTCCCGTTGAGCACGTTGGCCAAGCCACTTAACAGGATTGAAGTGGCGAACGGCCAGCT  
TGGTCCGTTCCATTGACATTCTGTTGGCCCTCATTAGATAACCCAGTAGTCC

>Otu5295

CCAGCCTATGGGTGGCAGCAGTAGGGAATTTTGCGCAATGGACGAAAGTCTGACGCAGCA  
ACGCCGCGTGAGTGATGAAGGCCTTCGGGTGTAAAGCTCTGTTGAGTGGGGAGAAAAGC  
TTTGGGGATAATCTACCAGAGCCTGACGGTACCATTTCGAGGAAGCACCGGCTAACTACGT  
GCCAGCAGCCGCGTAATACGTAGGGTGCAAGCGTTGTTTCGGAATCACTGGGCGTAAAGG  
GAGCGTAGGTGGGGTTGTAAAGTTAGGAGTTTAATACATGGGCTTAACCCATGGCTGGCTC  
TTAAGACTGCGATACTTGAGTATTGGAGAGGGCGATGGAATTCAGGTGTAGCGGTGGAA  
TGCGTAGATATCTGGAAGAACACCAGAAGCGAAGGCGGTGCGCTGGCCAAATACTGACAC  
TGAGGCTCGAAAGCTAGGGGAGCAAACAGGATTAGAAACCCTGGTAGTCC

>Otu5297

CCAGCCTACGGGTGGCAGCAGTCAAGAATATTCTCAATGGACGAAAGTCTGAAGGAGCG  
ACGCCGCGTGACTGATGAAGTCCTTCGGGATGTAAAGGTCTTTTCTTAAGGAAGAAACAA  
TGACGGTACTTAAGGAATAAGAGGTTGCTAACTCTGTGCCAGCAGCAGCGTAATACAGA  
GACCTCAAGCGTTATCCGGCTTGATTGGGTGTAAAGCGTGCGCAGGCGGCTTGTTAAGCC  
GACGGTTAAATCTTGTGGCTCAACTGCAAGATTGCCGCCGGAAGTGGCAAACCTAGAGCAT  
GGAAGAGGCGAGCGGAATTGCCGGTGTAAACGGTAAAATGTGTTAATATCGGCAAGAACAC  
CAGAGGCGAAAGCGGCTCGCTGGTACATCGCTGACGCTGTGGCACGAAAGCGTGGGGAGC  
AAATGGGATTAGAGACCCCCGTAGTCC

>Otu5298

CCAGCCTATGGGGGGCTCCAGCAGGGAATCTTGGAATCTGCGAAAGCGGGAACCAGCAA  
CGCCGCGTGTGCGATGAAGGCCTTCGGGTGCTAAAGCACTTTTCGAGGGGATGAGGAAGG  
ACAGTACCCTCGGAATAAGTCTCGGCTAACTACGTGCCAGCAGCCGCGGTAAAACGTAGG  
AGGCAAGCGTTATCCGGATTTACTGGGCGTAAAGCGTGTGCAGGCGGTTTGGAAGTTGG  
ATGTGAAAGCTCCTGGCTTAACTGGGAGGGTTCGTTCAATACTACCAGGCTAGAGGATGG  
GAGAGGGAGGTGGAATTCGGGTGTAGTGGTGAAACGCGTAGATATCCGGAGGAACACCA  
GTGGCGAAAGCGGCCTCCTGGCCCATTTCTGACGCTCATAACGAAAGCTAGGGTAGCAA  
ACGGGATTAGAGACCCTTGTAGTCC

>Otu5300

CCAGCCTATGGGAGGCTGCAGTCGAGAATTTTTTCACAATGGGCGCAAGCCTGATGGAGCG  
ACGCCGCGTGGGGGATGAATGGCTTCGGCCCGTAAACCCCTGTCATTTGCGATCAACCGT  
TATTGTTTAAAGAGATGATAACCTGATAGTAGCGAAAGAGGAAGGGACGGCTAACTCTGTG  
CCAGCAGCCGCGTAATACAGAGGTCCCAAGCGTTGTTTCGGATTCACTGGGCGTAAAGGG  
TGCGTAGGTGGCGAAGCAAGTCGGATGTGAAATCTCCGAGCTCAACTCGGAAACTGCATT  
GGAAACTGCTTTGCTCGAGGATTGGAAGGGGGACTGGAATACTTGGTGTAGCAGTGAAAT  
GCGTAGATATCAAGTGGAACACCAGTGGCGAAGGCGGCCTCCTGGACCATTTCTGACGCT  
CAGACACGAAAGCTAGGGGAGCAAACGGGATTAGATAACCCTAGTAGTCC

>Otu5305

CCAGCCTATGGGGGGCTGCAGCTAAGAATCTTCCGCAATGGGGGAAACCCTGACGGAGCG  
ACGCCGCGTGGGGGATGACGGCCTTCGGGTGTAAACCCCTTTTCTAGAGGAAGAAATAT  
GACGGTACTCTAGGAATAAGTCTTGGCTAACTACGTGCCAGCAGCCGCGTAATACGTAG  
AAGGCGAACGGTATCCGGATTTACTGGGCGTAAAGCGGGTGTAGACGGTTTTTTAAGTCA  
GTTGTGAAATCTCCTGACTCAATTGGGAGTCTGCAATTGATACTGGAGAAGTTGAGGGCA  
TCAGAAGAAAGCAGAATTCACGGTGTAGCGGTGAAATGCGTAGATATCGTGAGGAATACC  
AGTGGCGCAAGCGGCTTTCTAGGATGCTCCTGACGTTGAGGCCCGAAAGTGTGGGGAGCG  
AAACGGATTAGATAACCCTCGTAGTCC

>Otu5306

CCAGCCTATGGGTCGCTCCAGTGGGGAATATTGGACAATGGGCGCAAGCCTGATCCAGCA  
ATGCCGCGTGTGTGAAGAAGGCCTGCGGGTGTAAAGCACTTTAAGCGGGGAAGAAGGCT  
CTTGAGTGAATAGCTTGAGGGATTGACGTTACCTGCAGAATAAGCACCGGCTAACTCCGT  
GCCAGCAGCCGCGTAATACGGAGGGTGCGAGCGTTAATCGGAATGACTGGGCGTAAAGC  
GCGCGTAGGCGGTTTCGATCAGTCTGAGGTGAAAGCCCTGGGCTTAACCTGGGAACGGCCT  
TGGAAGTGTGCGAGCTAGAGTGTGGGAGAGGGCGTGGAATTTCCGGTGTAGCAGTGAAA  
TGCGTAGAGATCGGAAGGAACACCAGTGGCGAAGGCGGCGCCCTGGACCAACACTGACGC

TGAGGTGCGAAAAGCGTGGGGAGCAAACAGGATTAGATACCCTCGTAGTCC

>Otu5313

CCAGCCTATGGGGGGCTGCAGTCGAGAATCTTTGGCAATGGGCGAAAGCCTGACCAAGCG  
ACGCCGCGTGAGGATGAAGGCCTTCGGGTGTAAACTCCTGTTGGGGGGTATGATGCGG  
GGAAGCGCTAATACCGTTTTCTCGTGACGTCAACCCCTGAGGAAGCCACGGCTAACTCTG  
TGCCAGCAGCCGCGGTAAGACAGAGGTGGCAAGCGTTGTTTCGGATTCACTGGGCTTAAAG  
GGTGCCTAGGCGGCCGAGTATGTCTGGTGTGAAATCCCCCGGCCCAACCGGGGAACTGCG  
CCGGAAACTGCTTGGCTCGAGGGCAGTAGAGGGGGGTGGAACCTCTGGTGTAGCGGTGAA  
ATGCGTAGATATCAGGAGGAACGCCGAGGCGAAAGCGACCCCTGGTCTGTCCCTGACG  
CTGTGGCACGAAAGCTAGGGGAGCAAACGGGATTAGAAACCCGGGTAGTCC

>Otu5315

CCAGCCTATGGGGGGCACCAGTCGAGGATCTTTGGCAATGAGCGCAAGCTTGACCAAGCG  
ACGCCGCGTGTGCGATGAAGGCCTTCGGGTGTAAAGCACTGTGAGGGGGATCAAGGGT  
AACTTGAGTGATCCCTGGAGGAAGCACGGGCTAAGTTCGTGCCAGCAGCCGCGGTAAGAC  
GAACCGTGCGAACGTTGTTTCGGAATCACCGGGCTTAAAGGGCGCGTAGGCGGCTCATCAA  
GTCAGGGGTGAAATACTTCAGCTTAACTGGAGAAGTGCCTTTGATACTGGTGAAGTCGAG  
GGAGGTAGGGGTGTGTGGAACCTCTGGTGGAGCGGTGAAATGCGTTGATATCAGAGGGAA  
CGCCGGTGGCGAAAGCGACGCACTGGACCTCTTCTGACGCTGAGGCGCGAAAGCTAGGGG  
AGCAAACGGGATTAGAAACCCCTGTAGTCC

>Otu5317

CCAGCCTATGGGGCGCAGCAGTGAGGAATATTGGACAATGGTGGCAACACTGATCCAGCC  
ATGCCGCGTGAGGATGAAGGCGCTACGCGTTGTAAACTGCTTTTGTACGGGAGAAAACC  
TATCTACGTGTAGATAGCTGATAGTACCGTAAGAATAAGCATCGGCTAACTTCGTGCCAG  
CAGCCGCGGTAATACGAAGGATGCAAGCGTTACCCGGATTTATTGGGCGTAAAGCGCGTG  
TAGGCGGGTCTTTAAGTCAGGGGTGAAATGCCAAGGCTCAACCTTGGAAGTGCCTTTGAT  
ACTGGAGATCTTGAGTCCGGGAGAGGTGAGTGGAAGTGCAGGTGTAGAGGTGAAATTCGT  
AGATATTGCGAAGAACACCAGTGGCGAAGGCGGCTCACTGGCCCGGAACTGACGCTGAGA  
CGCGAAAGCGTGGGGAGCAAACAGGATTAGAAACCCCCGTAGTCC

>Otu5318

CCAGCCTATGGGGTGCAGCAGTCGAGAATTTTTCTCAATGGGCGAAAGCCTGAAGGAGCG  
ACGCCGCGTGGGGGATGAATGGCTTCGGCCCGTAAACCCCTGTCATTTGTGAACAAATTA  
TTCCACCCAACACGTGGAGTATTGATAGTAACGGAAGAGGAAGGGACGGCTAACTCTGTG  
CCAGCAGCCGCGGTAATACAGAGGTCCCAAGCGTTGTTTCGGATTTACTGGGCGTAAAGGG  
TACGTAGGCGGTTGGGTAAGTCTGACGTGAAATCTCCGGGCCTAACCCGAAACTGCGTT  
GGAAACTATCCAGCTAGAGGAATGGAGGGGAGACTGGAATACTTGGTGTAGCAGTGAAAT  
GCGTAGATATCAAGTGGAACACCAGTGGCGAAGGCGAGCCTCTGGACAGCTCCTGACACT  
CAGGGACGAAAGCTAGGGGAGCAAACGGGATTAGATACCCTGTAGTCC

>Otu5319

CCAGCCTACGGGGGGCAGCAGTCGAGAATTTTTCAATGGGCGCAAGCCTGATGGAGCG  
ACGCCGCGTGGGGGATGAATGGCTTCGGCCCGTAAACCCCTGTCATGTGCGATCAATGCT  
GTATGGTGAATAATTGTACAGTTGATAGTAACGCAAGAGGAAGGGACGGCTAACTCTGTG  
CCAGCAGCCGCGGTAATACAGAGGTCCCGAGCGTTGTTTCGGATTCACTGGGCGTAAAGGG  
TGCGTAGGCGGCTGGGTAAGTCTGATGTGAAATCTCCGGGCCCAACCCGAAACGGCATT  
GGATACTATCCGGCTCGAGGTTTGGAGGGGGGACTGGAATTCTCGGTGTAGCAGTGAAAT  
GCGTAGATATCGAGAGGAACACCAGTGGCGAAGGCGGGTCCCTGGACAACACCTGACGCT  
GAGGCACGAAAGTCGGGGGAGCAAACAGGATTAGAGACCCTAGTAGTCC

>Otu5325

CCAGCCTATGGGGCGCTCCAGTGGGGAATCTTGACAATGGGGGAAACCCCTGATGCAGCG  
ACGCCGCGTGAGCGATGAAGCCCTTCGGGTGTAAAGCTCTTTCGGCAGGGACGATAATG  
ACGGTACCCGATGAATAAGCACCGGCTAACTACGTGCCAGCAGCCGCGGTAAGACGTAGG  
GTGCGAGCGTTGTCCGATTTACTGGGCGTAAAGGACGCGTAGGCGGTCTGTTTAGTGTG  
AAGTGAAATCTCCAGAGCTCAACTCGGAAACTGCTTCGCATACTGGCAGACTAGAGGGAT  
GCAAAGGTAGCTAGAATTCTTGGTGTAGCGGTGAAATGCGTTGATATCAGGAGGAATACC  
CATGGCGAAGGCAGGCTACTGGGCATCATCTGACGCTGAGGCGTGAAAGCGTGGGTAGCA  
AACAGGATTAGATACCCTGGTAGTCC

>Otu5326

CCAGCCTACGGGGCGCACCAGTCGAGAATTTTTCTCAATGGGCGAAAGCCTGAAGGAGCG  
ACGCCGCGTGGGGGATGAATGGCTTCGGCCCGTAAACCCCTGTCATTCGGGATCAATGCT

TTCGACCTAATACGTCGAGAGTTGATAGTACCGAAAGAGGAAGAGACGGCTAACTCTGTG  
CCAGCAGCCGCGAGTAATACAGAGGTCTCAAGCGTTGTTTCGGATTCACTGGGCGTAAAGGG  
TGCGTAGGTGGCGGGGCAAGTCTGACGTGAAATCTCCGGGCCTAACCCGAAACTGCGTT  
GGAAACTGCCTTGCTAGAGGATTGGAGGGGAGACTGGAATACTTGGTGTAGCAGTGAAAT  
GCGTAGATATCAAGTGGAACACCAGTGGCGAAGGCGAGTCTCTGGACAATTCTCTGACACT  
GAGGCACGAAAGCTAGGGGAGCAAACGGGATTAGATACCCTTGTAGTCC

>Otu5327

CCAGCCTATGGGGCGCAGCAGTTGGGAATCTTGGACAATGGGGGAAACCCTGATCCAGCC  
ATGCCGCGTGAGTGATGAAGGCCCTTAGGGTTGTAAAGCTCTTTTACCCGGAAGATAATG  
ACTGTACCGGGAGAATAAGCTCCGGCTAACTTCGTGCCAGCAGCCGCGGTAATACGAAGG  
GGGCTAGCGTTGTTTCGGAATTACTGGGCGTAAAGCGCGCGCAGGCGGTTCTCCAAGTCAG  
TGGTGAAAGCCCAGAGCTCAACTCTGGAAGTCCATTGAAACTGTTGAACTTGAGGACGG  
GAGAGGTGAGTGGAATTCCTCAGTGTAGAGGTGAAATTCGTAGATATTAGGAAGAACACCA  
GTGGCGAAGGCGGCCAACTGGCCCCATACTGACGCTCATGTGCGAAAGCGTGGGGAGCAA  
ACAGGATTAGATACCCTTGTAGTCC

>Otu5330

CCAGCCTATGGGTGCTCCAGTGGGAATCTTGCACAATGGGGGAAACCCTGATGCAGCG  
ACGCCGCGTGAGCGATGAAGCCCCCTCGGGTGTAAAGCTCTTTCGGCAGGGAAGACGATG  
ACGGTACCTGCAGAAGCAGCTGCGGCTAACTACGTGCCAGCAGCCGCGGTAATACGTAGG  
CAGCGAGCGTTGTTTCGAGTTACTGGGCGTAAAGGGTGTGTAGGCGGTTGTTTAAGTTTG  
GTGTGAAATCTCCCGGCTCAACCGGGAGGGTGCGCCGAATACTGAGCGACTAGAGTGC GG  
GAGAGGAGAGTGGAATTCCTGGTGTAGCGGTGAAATGCGTAGATATCGGGAGGAACACCT  
GTGGCGAAAGCGGCGCACTGGACCCTTTTGACGCTGATGCGCGAAAGCTAGGGGAGCAA  
ACAGGATTAGAGACCCCAGTAGTCC

>Otu5331

CCAGCCTACGGGGGGCAGCAGCTAGGAATATTGGGCAATGGACGAAAGTCTGACCCAGCG  
ACACCGCGTGAGAGGATGACAGCCCTCGGGTGTAAACTCCTTTTAATAGGCCTTTTACGG  
CTTATAGAATAAGCCCCCTACTAACTACGTGCCAGAAGTCTCGGTAATACGTAGGGGGCAA  
GCGTTATCCGGATTTATTGGGCGTAAAGTGTGCGTAGGCGCCTCGACAAGTCGTATCTTA  
AAGACCAAGGCTTAACCTTGGGAGTGGATACGATACTGCCGAGGTTGAGGATTGTCAGGG  
ATGTCGGAACAGTTAGTGTAGCAGTGAAATGCGTTGATATTAAGTGAACACCAAAGGCG  
AAGGCAGACATCTGGGATTTTCTGACGCTGAGGCACGAAAGCTAGGGTAGCGAAACAGA  
TTAGAAACCCCTGTAGTCC

>Otu5333

CCCAGCCTACGGGGGGCAGCAGCGGGGAATTTTGGACAATGGGGGAAACCCTGATCCAGC  
GATGCCGCGTGTTGTAAGAAGGCCTTCGGGTGTAAAGCACTTTAGTTGGGGAAGAGAGG  
TTATTTGCGAATAGTGGATGACTGAGACATTACCCAAAGAATAAGCACCGGCAAACCTCTG  
TGCCAGCAGCCGCGGTAATACAGAGGGTGCAAGCGTTAATCGGAGTGATTGGGCGTAAAG  
GGCGCGTAGGCGGTGAGCTAAGTTAGTTGTGAAATACCAGAGCTTAACCTTGGGGAGTCA  
ACTAAGACTGGCACACTAGAGTACAGTAGAGGGGAGTGGAATTTCCGGAGTAGCGGTGAA  
ATGCGTAGATACCGGAAGGAACACCAGAGGGCGAAGGCGACTCTCTGGGCTGTAAGTACG  
CTGAGGCGCGAAAGCGTGGGTAGCAAACAGGATTAGAGACCCCTGTAGTCC

>Otu5335

CCAGCCTACGGGGGGCTCCAGTGGGAATATTGGACAATGGGGGAAACCCTGATCCAGCA  
ATGCCACGTGTGCGAAGAAGGCCTTAGGGTTGTAAAGCACTTTAGTAGGGGAGCAAGGTC  
ATGACATTAATACCGTCATGATTTGAGAGTACCCTAAGAATAAGCACCGGCAAACCTCTGT  
GCCAGCAGCCGCGGTAATACAGAGGGTGCAAGCGTTAATCGGAATTACTGGGCGTAAAGG  
GCTTGTAGGCGGTTAATTAAGTTAGATGTGAAATACCTGGGCTTAACCTGGGAATGGCAT  
TTAATACTGGTTAGCTAGAGTATGGTAGAGGAAAGGGGAATTTCCGGTGTAGCAGTGAAA  
TGCGTAGATATCGGAAGGAACATCAGTGGCGAAGGCGCCTTTCTGGACTAATACTGACGC  
TGAGGAGCGAAGGCGTGGGGAGCAAACAGGATTAGATACCCGCGTAGTCC

>Otu5338

CCAGCCTATGGGGTGCAGCAGTAGGGAATTTTCCGCAATGGGCGAAAGCCTGACGGAGCA  
ACGCCGCGTGAGGGATGAAGGGTTTCGGCTGTAAACCTCTTTGGAGCGAGACGAACGGG  
TATCCAGTTAAACAATTGGGTACCGTGACTGTATCGCTAGAACAAAGTGACGGCTAACTCTG  
TGCCAGCAGCCGCGGTGATACAGAGGTCACGAACGTTGTCCGGAATTATTGGGCGTAAAG  
GGCGCGTAGGTGGTTAGATAAGTCAGATGTGAAAGCTCTGGGCTCAACCCAGGAATTGCA  
TTTGATACTGTTTGACTTGAGTACGGTAGAGGAGAGTGGAATTTCCAGTGTAGCGGTGAA



ATGCGTAGATATTGGGAGGAACACCGGTGGCGAAGGCGGCTCTCTGGACCGAAACTGACA  
CTGAAGCGCGAAAGCCAGGGGAGCAAACGGGATTAGAAACCCAGTAGTCC

>Otu5339

CCAGCCTACGGGTGGCAGCAGTGGGGAATTTTGCGCAATGGGGGAAACCCTGACGCAGCA  
ACGCCGCGTGAGGATGAAGTCCTTCGGGACGTAAACTCCTTTTCGATCGGGACGATTATG  
ACTGTACCGGGAGAATAAGCTCCGGCTAACTTCGTGCCAGCAGCCGCGGTAATACGAAGG  
GGGCTAGCGTTGTTTCGGAATTACTGGACGTAAAGCGCGCGCAGGCGGCCAAACAAGTCAG  
GGGTGGAAGCCCAGAGCTCAACTCTGGAAGTGCCTTTGAAACTTTTTGGCTAGAGGACGG  
GAGAGGTGAGTGGAATTCCAGTGTAGAGGTGAAATTCGTAGATATTGGGAAGAACACCG  
GTGGCGAAGGCGGCTCACTGGCCCGTTTCTGACGCTCAGGCGCGACAGCGTGGGGATCAA  
ACAGGATTAGATACCCTCGTAGTCC

>Otu5345

CCCAGCCTATGGGGCGCTGCAGTGGGGAATATTGGTAATCTGCGAAAGCGGGAACCAGCA  
ACGCCGCGTGTGCGATGAAGGCCTTCGGGTCGTAAAGCACTTTTTGAGGAGACGAGGAAG  
GACGGTATCCTCAGAATAAGTCTCGGCTAACTACGTGCCAGCAGCCGCGGTAATACGTAG  
GGTGCAAGCGTTAATCGGAATTACTGGGCGTAAAGCGTGCGCAGGCGGTTTTGTAAAGACA  
GATGTGAAATGCCCCGGGCTTAACCTGGGAAGTGCATTTGTGACTGCAAGGCTAGAATCTG  
GCAGAGGGGGGTAGAATTCCACGTGTAGCAGTGAAATGCGTAGAGATGTGGAGGAATACC  
GATGGCGAAGGCAGCCCCCTGGGCCAAGATTGACGCTCATGCACGAAAGCGTGGGGAGCA  
AACAGGATTAGAAACCCCCGTAGTCC

>Otu5347

CCAGCCTATGGGATGCTCCAGTCGAGAATCTTTCACAATAGGGGCAACCCTGATGGAGCG  
ACGCCGCGTGAGGATAAGGTCTTCGGATTGTAAACTCCTGTTCATGTGGGAGCAAGGCAC  
ACCAGTTAACACCTGGTTTTGTTTGATAGTACCACAAGAGGAAGAGACGGCTAACTCTGTG  
CCAGCAGCCGCGGTAATACAGAGGTCTCAAGCGTTGTTTCGGAATCACTGGGCGTAAAGGG  
TGTGCAGGCTGCGTGTTAAGTCAGATGTGAAAGCCCGGGGCTCAACCCCGGAAGTGCATC  
CGATACTGGCATGCTAGAGAAATTGGAGAGGAGTCTAGAATTCACGGTGTAGCAGTGAAAT  
GCGTAGATATCGTGAGGAATACCAAGTGCGAAGGCAGGACTCTGGACATTTTCTGACGCT  
GAGACACGAAGGCCAGGGGAGCAAACGGGATTAGAAACCCAGTAGTCC

>Otu5353

CCAGCCTATGGGTGGCACCAGTAGGGAATTTTGCGCAATGGACGAAAGTCTGACGCAGCA  
ACACCGTGTGAGGGATGAAGCATTTCGGTGTGTAAACCTCTGTTCGATGATGAATAAGGTT  
TCGGGGAGTGAAAGCCTCGGGATTGAAGGTAGTCATGAAGGAAGCACCGGCTAACTCTG  
TGCCAGCAGCCGCGGTAATACAGGGGGTGCAAGCGTTGTTTCGGAATTACTGGGCGTAAAG  
GGAGCGTAGGCGGAAGTGCAGACAGGGGTCAAATCTCCGGGCTCAACCCGGAAGTTCGCC  
TTTGTGACTGCGGTTCTTGAGTATGGTAGAGGTCAGTGGAATTTCCGGTGTAGCGGTGGA  
ATGCGTAGAGATCGGAAAGAACACCAGAGGCGAAGGCGACTGACTGGGCCAATACTGACG  
CTGAGGCTCGAAAGCGTGGGGAGCAAACAGGATTAGATACCCTTGTAGTCC

>Otu5356

CCAGCCTATGGGTCGCACCAGTGGGGAATTTTGTGCAATGGGGGAAACCCTGACACAGCG  
ACACCGCGTGAGCGAAGAAGCCCTTTGGGGTGTAAGCTCTGTTCAGCTGGAACGAAAAAA  
ATGACGGTACCAGCAGAGGAAGCATCGGCTAACTACGTGCCAGCAGCCGCGGTAAGACGT  
AGGATGCGAGCGTTGTCCGGATTTATTGGGCGTAAAGGGTTCGTAGGCGGTTTCGTTAAGT  
TTGGTGTTAAAGATCGGGGCTCAACCCCGGAGTGCAGTGAATACTGGCGGACTGGAGTG  
TGGTAGAGGCTAGTGGAATTCCAGTGTAGCGGTGAAATGCGTAGATATTGGGAAGAACA  
CCGGTGGCGTAGGCGACTAGCTGGGCCATAACTGACGCTGAGGAACGAAAGCTAGGGGAG  
CAAACGGGATTAGATACCCGCGTAGTCC

>Otu5361

CCAGCCTACGGGAGGCACCAGTCAAGCACGAGCCTAAGATCCGACTCGGCCTGTGCCGAA  
AAGCCACGGATGGACGAGCCATCAAAAGTCAGGTTGTCTAAGCTCTTCAAGAGGAACTTC  
TTGTCGTAATCCAGCATGTGGAGACGACCTTCGAGGTCGGTGAAGCAGACGGTAACGGCC  
TTGATGGCCTTTTCGTCGGTCAGCTCTTCCGACCGTCGCTCGCGCAGCTGATCCGCGGGC  
GTTCCGGCGAGTCGTTCTTCTTTAGCTTGAGATTCTTTATCTCAAGCTGGTCATAGGGC  
AGCTGGTAGAATTCGCGCAGGGGTGAGTCCATTAGAGTTTCTCCATTCCATTCGTAGAGG  
ACGATTGACTGAAGTTGCGGTCTGGTGGCTCAAATTAGATACCCCGTAGTCC

>Otu5362

CCAGCCTACGGGTCGCTCCAGTCGAGAATCATTCGCAATGGGCGAAAGCCTGACGATGCG  
ACGCCGCGTGAGCGATGAAGGCCTTAGGGTCGTAAAGCTCTTTCGCTTGGAACAAGAGA

AGCTGACGAATAATCAGCGGATTTGAGGGTACCAGGTAAAGAAGCACCGGCTAACTCCGT  
GCCAGCAGCTGCGGTAATACGGAGGGTGCGAGCATTAATCGGATTTATTGGGCGTAAAGG  
GCGCGTAGGCGGGAAGCTAAGTCAGATGTGAAATCCCGGGGCTCAACCCCGGAACAGCAT  
ATGAAACTATTTTCTTGAGGGTAGTCGGAGAGAATGGAATTCACATGTAGCGGTGAAA  
TGCGTAGATATGTGGAAGAACACCGGTGGCGAAGGCGATTCTCTAGGTTATTCCTGACGC  
TAAAGCGCGAAAGCAAGGGGATCAAACAGGATTAGAGACCCGAGTAGTCC

>Otu5363

CCAGCCTATGGGTCGCTGCAGTGGGGAATCTTGACAATGGAGGAACTCTGATGCAGCG  
ACGCCGCGTGAGCGATGAAGCCCTTCGGGGTGTAAGCTCTTTCGACGGGAACGATAATG  
ACGGTACCCGGAGAAGAAGCTGCGGCTAACTACGTGCCAGCAGCCGCGGTAATACGTAGG  
CAGCAAGCGTTGTTTCGAATTACTGGGCGTAAAGAGTGTGTAGGCGGTTTTCTATGTTTCG  
GTGTGAAATCTCCCGACTTAACTGGGAGGGTGCGCCGAAAACCTGGAAGGCTTGAGTATGG  
GAGAGGAAAGCGGAATTCCTGGTGTAGCGGTGAAATGCGTAGATATCAGGAAGAACACCA  
GTGGCGTAGGCGACTAACTGGGCCGTAACCTGACGCTGAGGAACGAAAGCCAGGGGAGCGA  
ATGGGATTAGAAACCCCTTGTAGTCC

>Otu5364

CCAGCCTATGGGGGGCACCAAGTGGGGAATATTGGACAATGGGCGCAAGCCTGATCCAGCA  
ATGCCGCGTGAGTGAAGAAGGCCTTCGGGTTGTAAAGCTCTTTTGTACGGGAAGAAACGG  
TGAGGGCTAATATCTCTTGCTAATGACGGTACCTGAAGAATAAGCACCGGCTAACTACGT  
GCCAGCAGCCGCGGTAATACGTAGGGTGCAAGCGTTAATCGGAATTACTGGGCGTAAAGC  
GTGCGCAGGCGGTTTTGTAAAGTCTGTCGTGAAATCCCGGGCTCAACCTGGGAATGGCGA  
TGGAGACTGCAAGGCTAGAATCTGGCAGAGGGGGGTAGAGTTCCACGTGTAGCAGTGAAA  
TGCGTAGATATGTGGAGGAACACCGATGGCGAAGGCAGCCCCCTGGGCTAAGATTGACGC  
TCATGCACGAAAGCGTGGGGAGCAAGCAGGATTAGATACCCGTGTAGTCC

>Otu5366

CCAGCCTATGGGTGGCAGCAGCAGTAGTTCCAGTCACAGCTTCTGCTGAAGGCTGTGTTT  
CGTTTTTCGTGCGTCATAGCGCCATCTGTCTCGCCGTCTCGGAAACGGTACTCTCTCCGAT  
GGCATTGATCAACGCGCTCATGCACAGAGCCCGAGTTGCATGCCGGTCGATCGAATCCTT  
AGTCTTGCTGTATGACTCGACGCCCCGTCCAGCGAAAGCGGGATCTTTCTGAAGGGCGAGT  
CTGTAGAAAGGGATGCCCCGAATTGCAAGTAACGCTCGACGCCGAGCAGCGCGAGTTGGT  
CAATGAACGCGAAAAGCGCAGCTTTACGGAGAGTACGCTCACTGCTGCTCGCGGACGCTG  
GCGGGACACAGCCTCTTTGGGGCGCCATCGGCCAATCCGAAAGGTAAGCCCTGCTGAAGC  
CTGAGAACAGAACACTTGGCACGGACGTCTCGACATTAGAGACCCCTGTAGTCC

>Otu5372

CCAGCCTATGGGGTGCTGCAGTGGGGAATAGTGGACAATAAACGAAGGTTTAATCCTAAC  
ATGTCGCGTGAGTGAAGAGCGATCTGTAAAGCGACATTAGGCTTGAATTGACGGTTAACT  
CTGTAAACTCTGTCGTCGGTAAAAAATAATGATGTAAACGAAAATTATATTTTTTAATT  
GAAACCCTGACTAACTTCGTGCCAGCAGTCGCGGTGAAACGGGGAGGGTGGGTGTTCTTT  
GTATTGACTGGGCGTAAAGCGTGCGTAGAAGGTTGGATAAGTTTAAATCTAAATTTTTTAA  
TTGGTATAATTAAATTTTTTTTAAACCTTCCGACTAGAGTTATATGGAAAATTATAGA  
TTATTGAGTGTAGGGGTGAAATCCGATAATATTCAAGGGGCTAACAACGATGAAAATAAT  
AATTTATTTATACTGACTTTGAGGCACTAAAGCGTAGGTATCGAATAGGATTAGATACC  
CTAGTAGTCC

>Otu5376

CCAGCCTACGGGTCGCAGCAGTGAGGAATCTTGCGCAATGGGCGAAAGCCTGACGCAGCG  
ACGCCGCGTGAAGGATGAAGGCCTTAGGGTTGTAAACTTCTGTAAAGTGGGAAAAATTAC  
CCGTTTTTAATAGAAACGGGGGATGATGGTACCCTAGAGAAAGCACCGGCTAATCTCGT  
GCCAGCAGCCGCGGTAATACGAGAGGTGCGAGCGTTATTCGGAATCATTGGGCGTAAAGG  
GTGCGTAGACGGTATGCTAAGTCAGTTGTAAATTTCCCGGCCTAACCGGGAACCTGCGA  
TTGAACTAGCGTACTAGAGGGTGGAAAGAGAGAAGTGGAAATTCCTCGGAGTAGCGGTAAAA  
TGCGTAGATATCGAGAGGAACACCGATGGCGAAGGCAGCTTCTTGGGCCACACCTGACGT  
TGAGGCACGAAAGCGTGGGGAGCAAACAGGATTAGAGACCCGTGTAGTCC

>Otu5377

CCAGCCTATGGGGGGCAGCAGTGGGGAATCTTGCGCAATGGACGAAAGTCTGACGCAGCA  
ACGCCGCGTGGGGGATGAAGGTTTTTCGGATTGTAAACTCCTGTCACTGCAGAACAAGGAT  
GGACGGTTGAATAGACCGTCCATTTGATGGTATGCGGAGAGGAAGGGACGGCTAACTCTG  
TGCCAGCAGCCGCGGTAAGACAGAGGTACCGAGCGTTGTTCGGATTTCATTGGGCGTAAAG  
GGTGTGTAGGAGGTGCGGTAAGTCAGGTGTGAAATCTCACAGCTTAACTGTGAAACTGCG

CTTGATACTGCCCCGGCTAGAGGATCGGAGGGGGTAACGGAATTTATGGTGTAGCAGTGAA  
ATGCGTAGATATCATAAGGAACACCGGTGGCGAAGGCGGTACTTGGAAAGATTCTCTGACT  
CTGAAACACGAAAGCCAGGGGAGCAAACGGGATTAGAGACCCTTGTAGTCC

>Otu5378

CCAGCCTACGGGAGGCTGCAGACGAGAATATTCGACAATGGACGAAAGTCTGATCGAGCG  
ACGCCGCGTGAGGATGAAGTGCTTCGGCATGTAACTCCTTTTGCCAGGGAAGAAGTTA  
TTGACGGTACCTGGAGAATAAGAGGTTGCTAACTCGTGCCAGCAGCAGCGGTAATACGA  
GTGCCTCGAGCGTTATCCGGAATTATTGGGCGTAAAGGGTGCCTAGGTGGTTGTGTTAGT  
CTCATGTCAAATCTCCCGGCTCAACCGGGAACCTGCATGGGAAACGGTACGACTTAGAGG  
TTGGAAGAGGTCTCGCGGAACCTCATGGTGTAGCGGTGAAATGCGTTGATATCATGGGGAA  
CACCAAAGCGAAGGCAGCAGACTGGTCCATACCTGACACTGAAGCACGAAAGCGTGGGT  
CGCGAATAGGATTAGAAACCCCTGTAGTCC

>Otu5383

CCAACCTATGGGAGGCAGCAGTGGGGAATATTGGACAATGGGCGAAAGCCTGATCCAGCC  
ATGCCGCGTGAGTGATGAAGGCCTTAGGGTTGTAAAGCTCTTTTGTACAGGGAAGATAATG  
ACGGTACCTGAAGAATAAGCACCGGCTAACTTCGTGCCAGCAGCCGCGGTAATACGAAGG  
GTGCTAGCGTTGTTTCGGAATTACTGGGCGTAAAGCGCGCTAGGCGGGCTGTCAAGTCAG  
GGGTGAAATCCCGGAGCTCAACTCCGGAACCTGCCTTTGAACTGTCAGCCTGGAGTGTGT  
GAGGGGATAGCGGAATTCCAAATGTAGAGGTGAAATTCGTAGATATTTGGAGGAACACCG  
GTGGCGAAGGCGGCTATCTGGCACACAACCTGACGCTGAGGTGCGAAAGCGTGGGGATCAA  
ACAGGATTAGATACCCGAGTAGTCC

>Otu5384

CCAGCCTACGGGGGGCAGCAGTGGGGAATATTGGACAATGGGGGCAACCCTGATCCAGCA  
ATGCCGCGTGAGTGAAGAAGGCTTTCGGATTGTAAAGCTCTTTTCGACGGGGACGATGATG  
ACGGTACCCGTAGAAGAAGCCCCGGCTAACTTCGTGCCAGCAGCCGCGGTAATACGAAGG  
GGGCTAGCGTTGCTCGGAATGACTGGGCGTAAAGGGCGCGTAGGCGGCTTGAACAGTCAG  
GCGTGAAATTCCTGGGCTTAACCTGGGGGCTGCGCTTGATACATTTGGGCTTGAGTGGGG  
AAGAGGGTCGTGGAATTCACAGTGTAGAGGTGAAATTCGTAGATATTTGGGAAGAACACCG  
GTGGCGAAGGCGGCGACCTGGTCCTTGACTGACGCTGAGGCGCGAAAGCGTGGGGAGCAA  
TCAGGATTAGATACCCGCGTAGTCC

>Otu5388

CCAGCCTATGGGATGCAGCAGTAGGGAATATTGCGCAATGGAGGAAACTCTGACGCAGCG  
ACGCCGCGTGGGTGACGAAGGCTTTCGGGTCGTAAACCCCTGTCGGAAGGAAAGAAAAGC  
GAGCTGGCTAATATCCAGCTCGATCGACGGTACCTTTAAAGGAAGCACCGGCTAACTACG  
TGCCAGCAGCCGCGGTAATACGTAGGGTGCAAGCGTTGTTTCGGAATCATTTGGGCGTAAAG  
CGCGTGTAGGTGGTTGGCTAAGTCGATTGTAAAAGCCCTAGGCTCAACCAAGGAAGTGCA  
TTCGAAACTAGCCAAGTAGAGGATGGCAGAGGAAGGTAGAATTCCAAGTGTAGAGGTGAA  
ATTCGTAGATATTTGGAGGAATACCGGCGGCGAAGGCGGCCTTCTGGACCATTCTCTGACA  
CTGAGACGCGAAAGCGTGGGGAGCAAACAGGATTAGAAACCCCCGTAGTCC

>Otu5391

CCAGCCTATGGGTGGCTCCAGTAACGAATCTTCCGCAATGCACGCAAGTGTGACGGAGCG  
ACGCCGCGTGTTGGGACGAAGCCCTTCGGGGTGTAACCACTGTCAGGGATAGGAAAGTTC  
TGATCCATCCCAGAGGAAGGCACGGCTAACTCTGTGCCAGCAGCCGCGGTAAGACAGAGG  
TGCCAAGCGTTAGGCGGAATCACTGGGCTTAAAGCGTGTGTAGGCGGATCGTTAAGTACC  
TTGTGAAATCCCCCGGCTCAACCGGGGAACCTGCTGGGTATACTGGCGATCTTGAGCCACT  
CAGGGGCAGATGGAACAGACGGTGGAGCGGTGAAATGCGTAGATATCGTCTGGAACGCCA  
AAGGTGAAAACAGTCTGCTGGGGGTGTGCTGACGCTGAGACACGAAAGCCAGGGGAGCAA  
ACGGGATTAGAAACCCGTGTAGTCC

>Otu5393

CCAGCCTACGGGACGCTCCAGTCGAGAATTTTTCACAATGGACGAAAGTCTGATGGAGCG  
ACGCCGCGTGAGGATGAAGGTTTTTCGGATTGTAACTCCTGTCACTGCAGAACAAGGCA  
GTGCGTATGAATAGTACGTGCTGTTGATGGTATGCGGAGAGGAAGGGACGGCTAACTCTG  
TGCCAGCAGCCGCGGTAATACAGAGGGTGCAGCGTTAATCGGAATTACTGGGCGTAAAG  
CGCGCGTAGACGGTTTTTGTAAAGTCAGATGTGAAATCCCTGGGCTCAACCTGGGAACTGCA  
TTTGAGACTGCATGGCTAGAGTATCGAAGAGGGGAAGTGGAATTTCCGGTGTAGCGGTGAA  
ATGCGTAGATATCGGAAGGAACACCAGTGGCGAAAGCGACTTCCTGGTCTGAATACTGACG  
TTCATGTGCGAAAGCGTGGGGAGCAAACAGGATTAGAAACCCAGTAGTCC

>Otu5403

CCAGCCTACGGGGTGCACCAGTGGGGAATATTGGACAATGGGGGAAACCCTGATCCAGCA  
ATGCCGCGTGTGTGAAGAAGGCCTGAGGGTTGTAAGCACTTTCGTTGGGGAGGAAAGACT  
CGATACTAATACTATTGAGGGATGACGCTACCCAAATAAGAAGCACCGGCTAACTCTGTG  
CCAGCAGCCGCGGTAATACAGAGGGTGCAGCGTTAATCGGAATTACTGGGCGTAAAGAG  
CACGTAGGTTGGTAGATATGTTGGCTGTGAAATTCCTGAGCTTAACTTGGGAAGGTCAGC  
CAAACTGTCTATCTAGAGTATGGTAGAGGAAAGTGAATTTTCAGGTGTAGCGGTGAAAT  
GCGTAGATATCTGAAGGAACATCAGTGGCGAAGGCGACTTCTGGACTAATACTGACACT  
GAGGTGCGAAAGCGTGGGGAGCAAACAGGATTAGAGACCCGAGTAGTCC

>Otu5404

CCGCCTACGGGGCGCACCAGTCGAGAATTTTTTCAATGGACGAAAGTCTGATGGAGCGA  
CGCCGCGTGGAGGATGAAGGTTTTTCGATTATAAACTCCTGTCACTGCAGAACAAGGGTG  
TGTGGTTGAACATTCCACACATTTGATGGTATGCGGAGAGGAAGGGACGGCTAACTCTGT  
GCCAGCAGCCGCGGTAAGACAGAGGTCCCGAGCGTTGTTTCGGATTCAATTGGGCGTAAAGG  
GTGTGTAGGAGGCTGGGTAAAGTCGGGTGTGAAATCTCGCAGCTTAACTGCGAAACTGCGC  
TTGATACTGCTCGGCTAGAGGATCGGAGGGGGTAACGGAATTTATGGTGTAGCAGTGAAA  
TGCGTAGATATCATAAGGAACACCGGTGGCGAAGGCGGTTACCTGGAAGATTCCTGACTC  
TGAAACACGAAAGCCAGGGGAGCAAACGGGATTAGAGACCCTTGTAGTCC

>Otu5406

CCAGCCTACGGGAGGCAGCAGTGGGGAATATTGGACAATGGGGGCAACCCTGATCCAGCG  
ATGCCGCGTGAGTGAAGAAGGCCTTCGGGTCGTAAAGCTCTTTAGTCCGGGAAGAAGGTG  
AAGTGGTGCATAGCCACGTTGCTTGACGGTACCGGAAGAATAAGCACCGGCAAACTCTGT  
GCCAGCAGCCGCGGTAATACAGAGGGTGCAGCGTTAATCGGAATTACTGGGTGTAAAGG  
GCGCGTAGGCGGCAAGATGTGTGTGATGTGAAAGCCCCGGGCTTAACCTGGGAAGCGTAT  
TGCAAACCTGTCTGGCTGGAGTACATGAGAGGGTGGCGGAATTTCCGGTGTAGCGGTGAAA  
TGCGTAGAGATCGGAAGGAACGTCAATGGCGAAGGCAGCCACCTGGCATGATACTGACGC  
TGAGGCGCGAAAGCGTGGGGAGCGAACAGGATTAGATACCCCTCGTAGTCC

>Otu5411

CCAGCCTACGGGGGGGCTGCAGTAGGGAATATTGCGCAATGGAGGAAACTCTGACGCAGCG  
ACGCCGCGTGGGTGACGAAGGCCTTTCGGGTCGTAAAACCCTGTGCGAAGGGACGAATTGC  
CATCTGATTAATACGCAGGTGGAGTGACGGTACCTTTAAAGGAAGCACCGGCTAACTACG  
TGCCAGCAGCCGCGGTAATACGTAGGGTGCAGCGTTGTTTCGGAATTATTGGGCGTAAAG  
CGCGTGTAGGTGGTTAATTAAGTCGATTGTAAAAGCCCTAGGCTCAACCAAGGAAGTGCA  
TTCGAAACTAGTTGACTAGAGGACGGCAGAGGAAGGTGGAATTCCAAGTGTAGAGGTGAA  
ATTCGTAGATATTTGGAGGAATACCGGCGGCGAAGGCGGCCTTCTGGACCGTTCTTGACA  
CTGAGACGCGAAAGCGTGGGGAGCAAACAGGATTAGATACCCCGTAGTCC

>Otu5413

CCAGCCTACGGGTTGCACCAGTGGGGAATCTTGCGCAATGGACGAAAGTCTGACGCAGCA  
ACGCCGCGTGAGTGAAGAAGGCCTTCGGGTTGTAAAGCTCTGTGAGCGGGACGAAAAGT  
CTTTAAGTTAATAGCTTAGAGATGTGACGGTACCGCTAAAGGAAGCACCGGCTAACTCTG  
TGCCAGCAGCCGCGGTAATACAGAGGGTGTAGCGTTGCTCGGAATTATTGGGCGTAAAG  
GGCAGGTAGGTGGTCTCGTTTGTCTGAGGTGAAAGCCCTGGGCTTAACCTAGGAAGTGCC  
TCGGAACCGCGAGACTAGAGTCTTGAGAGGGTTCGCGGAATACCCGGTGTAGCGGTGAA  
ATGCGTAGAGATCGGGTGAATACCAGAGGCGAAGGCGGCGACCTGGACAAGAGCTGACA  
CTCAACTGCGAAAGCGTGGGGAGCAAACAGGATTAGAGACCCGCGTAGTCC

>Otu5416

CCAGCCTACGGGGGGGCTGCAGTGGGGAATCTTGCGCAATAGGCGAAAGCCTGACGCAGCA  
ACGCCGCGTGGGGGATGAAGCTTTTCGGAGTGTAACCCCTTTTCGACCCGGAAGAAGGCC  
CGCAAGGGTCCGACGGTACGGGTATAAGAAGCCCCGGCTAACTACGTGCCAGCAGCCGCG  
GTAAAACGTAGGGGGCCAGCGTTGCTCGGAATTACTGGGCGTAAAGAGTTGCGTAGGTGG  
CATTGTAAGCAAGTAGTGAAAGCGTCCGGCTCAACCGGATAAACATTACTTGAAGTGC  
AGCTAGAGGATGAGAGAGGTTATTGGAATTCCTGCGTAGGAGTGAAATCCGTAGATATA  
GGGAGGAACACCGATGGCGTAGGCAGATAACTGGCTCATTCCTGACACTAAGGCACGAAA  
GCGTGGGTAGCAAACGGGATTAGATACCCCTTGTAGTCC

>Otu5418

CCAGCCTATGGGGGGGCTGCAGTGGGGAATATTGGACAATGGGGGAAACCCTGATCCAGCC  
ATGCCGCGTGAAATGATGAAGGCCTTCGGGTTGTAAAGTTCTTTTGACAGGGAAGATGATG  
ACGGTACCTGTAGAATAAGCTCCGGCTAACTTCGTGCCAGCAGCCGCGGTAATACGAAGG  
GAGCTAGCGTTGTTTCGGAATTACTGGGCGTAAAGGGCGCGTAGGCGGTTTAGCAAGTTGG

ATGTGAAAGCCCAGGGCTCAACCCTGGAATTGCATTCAAGACTACTTTACTTGAATTCGG  
TAGAGGTTGGTAGAATTCACAGTGTAGAGGTGAAATTCGTAGAGATTGGGAAGAATACCC  
GTGGCGAAGGCGGCCAACTGGACCGACATTGACGCTGAGGCGCGAAAGCGTGGGGAGCAA  
ACAGGATTAGAAACCCGGGTAGTCC

>Otu5422

CCAGCCTATGGGGTGCTGCAGTAGGGAATATTGCGCAATGGGCGAAAGCCTGACGCAGCG  
ACGCCGCGTGAGTGATGAAGGCCTTAGGGTCGTAAAGCTCTGTTGTACGGGAAGAAAAAA  
ATGACGGTACCGTATAAGAAAGGATCGGCTAACTTCGTGCCAGCAGCCGCGGTAATACGA  
GGGATCCTAGCGTTGTTTCGGAATTATTGGGCGTAAAGGGTGCGTAGGTGGCCTTGATAGT  
CAGTTGTGAAATCCCCGGGCTCAACCCGGGAAGTGCTTCTGATACTACAAGGCTTGAGTA  
CTGCAGAGGTGAGTGGAATTCAGGTGTAGTGGTGAAATACGTAGATATCTGGAGGAACA  
CCGGTGGCGAAGGCGGCTCACTGGGCATGTACTGACACTGAAGCACGAAAGCGTGGGGAG  
CAAACAGGATTAGAAACCCCGTAGTCC

>Otu5425

CCAGCCTATGGGGGGCTGCAGTTCGGAATATTTCGGCAATGGGCGAAAGCCTGACCGAGCG  
ACGCCGCGTGCGGGATGAAGGCCCTTTGGGTTGTAAACCGCTGTCACAGGTGAGCAAATC  
ATTCTGGCTGAATAATCCAGGATGTTGAGTTAAGCTTGAGAGGAAGCCCCCGCTAATCAC  
GTGCCAGCAGCGGCGGTAATACGTGAGGGGCGAACGTTGTTTCGGTGTCACTGGGCTTAAA  
GGGTGCGTAGGTGGCTGCGTAAGTAAGGTGTGAAAGCCCTCGGCTTACCCGGGGAATTGC  
GCCTTATACTGCGCGGCTTGAGGATTTTCAGGGGAAAGGGGAAGTCCAGGTGTAGCGGTGA  
AATGCGCAGATATCTGGGGGAAGGCCGGCGCGAAGGCGCCTTTCTGGGAAATTCTCTGAC  
ACTGAGGCACGAAAGCGTGGGGAGCAAACAGGATTAGAGACCCTTGTAGTCC

>Otu5432

CGGGGGGCGAGCAGCGAGGAATATTGGACAATGGGCGAAAGCCTTGATCCAGCAATATCACA  
TGAGAGAAGAAGACTTTTTTGTGTAAATCTATTGCGTTAAGGAGGATAATGACGAATACT  
TAAAGAAGAAGTCCCGGCTAACTTCGTGCCAGCAGCCGCGGTAATACGGAGGGGACGAGT  
GTTACTCATAATAACTGGGCGTAAAGGGTATGTAGGTGGTTTATTTAGTTAAATAAAAAA  
AAATAAATTAATAGTTTATAAAATTTATTTAAAACGTATAAACTAGAGTATAAGAGAGGAA  
TATAGAATTTTGTAGTGAAGGGTGAATCTAACGATAATAAAAAGACTATCAAATGCGAA  
GGCAATATTCTAGATTATTACTGACACTGAGGTACTGAAGCATGGGGAGCAAATCGGATT  
AGAAACCCCGTAGTCC

>Otu5441

CCAGCCTATGGGAGGCTGCAGTAGGGAATCTTCCGCAATGGGCGAAAGCCTGACGGAGCA  
ACGCCGCGTGAGTGAAGAAGGTCTTTCGGATCGTAAACTCTGTTATTAGGGAAGAACAAA  
TGTGTAAGTAACTATGCACGTCTTGACGGTACCTAATCAGAGAGCCACGGCTAACTACGT  
GCCAGCAGCCGCGGTAATACGTAGGTGGCAAGCGTTATCCGGAATTATTGGGCGTAAAGC  
GCGCGTAGGCGGTTTTTTTAAAGTCTGATGTGAAAGCCCACGGCTCAACCGTGGAGGGTCAT  
TGGAACCCGGAAGAACTTGAGTGCAGAAGAGGAAAGTGAATTCATGTGTAGCGGTGAAA  
TGCGCAGAGATATGGAGGAACACCAGTGGCGAAGGCGACTTTCTGGTCTGTAAGTACGCG  
TGATGTGCGAAAGCGTGGGGATCAAACAGGATTAGATACCCCGTAGTCC

>Otu5443

CCAGCCTACGGGGCGCACACAGATGACCTGATCCTTGTCCAGGCGAATAATCCGGGCGGAG  
CACTACCACAAGGAGTGAGTTCAAGCTGAGAGCCCCTTGAGAAGAGGCTGTACGAACCTCG  
TTGGCTCGGTGAATGTGTGCGGATACGTGAGCGAATCCCAATTAAAAGATGCGTGACCGC  
GCGGGCAAGGGAGAGAGGTGGAATTTTCGCTCATATGCCCCAAGGATTTCTCTCAGACGAC  
TATTTTCTTGTCTAACGCGTTGCAATGGCGTCATCGTCACCATCTCTGGGTAGACGCAGT  
GCTTGGGATCGCGGCATCGCTTGACAGGACGGCGTGGTCTTGTGCGCATCTCTGGTAATTGA  
ACTGTTGTGATACGAAAAGAACGCCGATGGATTAGATACCCTGGTAGTCG

>Otu5455

CCAGCCTACGGGACGCTGCAGCCGAGAATCATTCGCAATGGGCGAAAGCCTGACGATGCG  
ACGCCGTGTGAGCGATGAAGGCCTTCGGGTGTAAAGCTCTTTCGCTTGGGAACAAGAGA  
AGCCGGAGAATACCCGGCGGATTTGAGGGTACCAGGTAAAGAAGCACCGGCTAACTCCGT  
GCCAGCAGCTGCGGTAATACGGAGGGTGCAAGCATTAATCGGATTTATTGGGCGTAAAGG  
GCGCGTAGGCGGTGAAATAAGTCAGATGTGAAATCCCGGGGCTCAACCCCGGAAGTGCAT  
TTGAAACTGTTTTTCTAGAGGGTGGGCGGAGAAAACGGAATTCACAAAGTAGCGGTGAAA  
TGCGTAGATATGTGGAAGAACACCGGTGGCGAAGGCGGTTTTCTAGCTTACACCTGACGC  
TAATGCGCGAAAGCAAGGGGATCAAACAGGATTAGAAACCCGAGTAGTCC

>Otu5456

CCAGCCTACGGGTCGCAGCAGTCGAGAATTCTTCTCAATGGGCGAAAGCCTGAAGGAGCG  
ACGCCGCGTGGGGGATGAATGGCTTCGGCCCGTAAACCCCTGTCATTTGCGAACAAATTG  
ACTCATCTAACACGTGTGTCTATTGATTGTAGTAGAAGAGGAAGGGACGGCTAACTCTGTG  
CCAGCAGCCGCGGTAATACAGAGGTCCCAAGCGTTGTTTCGATTCACTGGGCGTAAAGGG  
TGCGTAGGCGGTTAGGTAAGTCTGATGTGAAAGCTCGGAGCTTAACCTCGAAATGGCATC  
GGATACTACTTGGCTAGAGGAATGGAAGGGAGACTGGAATACTTGGTGTAGCAGTGAAAT  
GCGTAGATATCAAGTGGAACACCAGTGGCGAAGGCGAGTCTCTGGACATTTCTCTGACGCT  
GAGACGCGAAAGCGTGGGGAGCAAACAGGATTAGAAACCCTAGTAGTCC

>Otu5460

CCAGCCTACGGGTGGCTGCAGTAGGGAATATTGCGCAATGGGCGAAAGCCTGACGCAGCA  
ATTCCGCGTGGAGGATGAAGGTTCTTGATTGTAAACTCCTTTTCGGTGGTGACGATAATG  
ACGGTAGCCACAGAAGAAGCACCGGCTAACTACGTGCCAGCAGCCGCGGTAAGACGTAGG  
GTGCAAGCGTTGTCCGGAATTATTGGGCGTAAAGAGTTTCGTAGGCGGTTTGTCAAGTCTG  
ATGTTAAATACCGAGGCTCAACCTCGACATGGCATCGGAAACTGACAGGCTAGAGTATGG  
TAGAGGTAAAGGGAATTCCTGGTGTAGCGGTGAAATGCGTAGATATCGGGAGGAACACCA  
GTGGCGAAAGCGCTTTACTGGACCATTACTGACGCTGAGGAACGAAAGCCAGGGTAGCGA  
AAGGGATTAGAGACCCTAGTAGTCC

>Otu5470

CCAGCCTACGGGTCGCTGCAGTCGAGAATTTTTCTCAATGGGCGAAAGCCTTAAGGAGCG  
ACGCCGCGTGGGGGATGAATGGCTTCGGCCCGTAAACCCCTGTCATTTGCGAACAAATTA  
GTCCGCCCAACACGCGGACTATTGATTGTAGCGGAAGAGGAAGGGACGGCTAACTCTGTG  
CCAGCAGCCGCGGTAATACAGAGGTCCCAAGCGTTGTTTCGATTCACTGGGCGTAAAGGG  
TGCGTAGGCGGTTGGGTAAGTTTGACGTGAAATCTCCGGGCCTAACCCGGAACCTGCGTT  
GAATACTACCCGGCTAGAGGATTGGAAGGGAGACTGGAATACTTGGTGTAGCAGTGAAAT  
GCGTAGATATCAAGTGGAACACCAGTGGCGAAGGCGAGTCTCTGGACAATTCCTGGCGCT  
GAGGCACGAAAGCTAGGGGAGCAAACAGGATTAGATACCCGAGTAGTCC

>Otu5472

CAGCCTATGGGAGGCTCCAGTGGGGAATTTTTTGCAATAAGTAAAAGCCTAACGAAGCAA  
TGTCGCGTGGAAGTAGAAGGCCACAGGTTCGTAAATTCTTTCTCGGAGAAGAAGTAAT  
GACGATATTTGAGGAATAAGCATCGACTAACTTTACGCCAACAGTTGTGGTAAGACAAAG  
GATGTAAGCATTATTCAAAATGATTGGGCGTAAAGCATCTGTAGGTGGCTATAAATCCGT  
TGTCAAATCCCAAGGCTCAACCCTAGATAGGCGATGGAACTACTGAGTTAAAGTATGGT  
AGGGGCAGAAGGAATTTCTAGTGGAATGGTGAATGCATAAAGATTGGAAAAAATACCAA  
CGACAAAAGCACTCTGCTAAGCCGACATTAACATTGAAAGACGAGAGCTAGGGGAGCAAA  
TGGGATTAGAAACCCGGGTAGTCC

>Otu5473

CCAGCCTATGGGGGGCAGCAGTAGGGAATATTGGACAATGGAGGCAACTCTGATCCAGCC  
ATGCCGCGTGAATGATGAAGGCCCTAGGGTTGTAAAGTTCTTTTAGCGGGGAAGATAATG  
ACGGTACCCGCGAATAAGCCCGGCTAACTCTGTGCCAGCAGCCGCGGTAATACAGAGG  
GGGCTAGCGTTGTTTCGGAATTACTGGGCGTAAAGGGCGCGTAGGCGGCTTTCTAAGTTAG  
GAGTGAAATCCCAGGGCTTAACCCTGGAATTGCTCTTAATACTGGAAGGCTTGAGATCGG  
TAGGGGATAGTGGAATTCCTAGTGTAGGAGTGAAATCCGTAGATATTAGGAGGAACACCA  
GTGGCGAAGGCGGCTATCTGGACCGATTCTGACGCTGAGGCGCGAAAGTGTGCGGAGCAA  
ACAGGATTAGAAACCCGGGTAGTCC

>Otu5474

CCAGCCTACGGGGGGCTCCAGTCGAGGATCTTTTCGCAATGGGCGAAAGCCTGACGAAGCG  
ACGCTGTGTGAGCGATGAAGGCCTTCGGGTGTAAAGCTCTTTTCGCATAAGAACAAGAGA  
GATCGGTGAACAACCGGTTCGATTTGAGGGTATTATGTAAAGAAGCACCGGCTAACTCCGT  
GCCAGCAGCTGCGGTAATACGGAGGGTGCAAGCATTAAATCGGATTTATTGGGCGTAAAGG  
GCGCGTAGGCGGATCTGAAAGTCAGATGTGAAATTCGAAGCTCAACTTCGGAGCTGCAT  
TTGAAACTCCAGATCTCGAGGAATGGCGGAGAAAATGGAATTCACGTGTAGCGGTGAAA  
TGCGTAGATATGTGGAAGAACACCAGTGGCGAAAGCGGTTTCTAGCTTTTCTCTGACGC  
TGAGGCGCGAGAGCAAGGGGAGCAAACAGGATTAGATACCCGTGTAGTCC

>Otu5479

CCAGCCTATGGGTCGCAGCAGTCAAGAATATTCCTCAATGGCCGAAAGGCTGAAGGAGCG  
ACGCCGCGTGCAGGATGAAGGTCTTCGGATTGTAAACTGCTTTTATAAGGGAAGAATTTG  
TGACGGTACCTTATGAATAAGAGGTTGCTAACTCTGTGCCAGCAGCAGCGGTAATACAGA  
GACCTCAAACGTTATCCGGATTTATTGGGCGTAAAGCGTCCGCGAGGTGGTTTAGCAAGTC

AGAGGTTAAAAACCTATCGCTTAACGATAGGGCCGCTTTTGATACTACTACGCTTGAGGTC  
GGAAGAGGTGAGCGGAATTCTCGGTGTAGTCGTAATAAGCGTTGATATCGAGAAGAACAC  
CAAATGCGAAGGCAGCTCACTGGTACGTACCTGACACTCATGGACGAAAGCGTGGGGAGC  
AAACAGGATTAGAAACCCCACTAGTCC

>Otu5482

CCAGCCTATGGGTGGCAGCAGTCAAGAACTTCCACAATGGACGAAAGTCTGATGGAGCG  
ACGCCGCGTGGTTGATGAAGTCCTTCGGGACGTAAAAACCTTTTATGAGGGAGGAAGTAA  
TTGACGTTACCTCATGAATAAGGGGCTCCTAACTCTGTGCCAGCAGGAGCGGTAATACAG  
AGGCCCCAAGCATTATCCGGAATTACTGGGCGTAAAGAGTGTGTAGGCGGTGCTCTAAGT  
TTGGTGTGAAATCTCCCGGCTCAACTGGGAGGGTGCGCCGAAACTGGGGTGTCTGAGCG  
TGGGAGAGGAAAGCGGAATTCTTGGTGTAGCGGTGAAATGCGTAGATATCAGGAGGAACA  
CCTGTGGTGTAGACGGCTTTCTGGACCATTGCTGACGCTGAGACACGAAAGCGTGGGTAG  
CAAACAGGATTAGATACCCTAGTAGTCC

>Otu5487

CCAGCCTATGGGTGCTGCAGTGAGGAATCTTGCGCAATGGGCGAAAGCCTGACGCAGCG  
ACGCCGCGTGGAGGATGAAGGTTTTTCGAATTGTAACTCCTGTTAAGCGGGAAGAAAGGC  
TCATCTTTAATACAGATGAGACATGACGGTACCGCTAGAGAAAGCACCGGCTAACTTCGT  
GCCAGCAGCCGCGTAATACGAGGGGTGCAAGTGTTATTTCGATTAACTGGGCGTAAAGG  
GTGCGCAGACGGTTTGTTAAGTCACTTGTTAAATTCTTCGGCCTAACTGAAGGTATGCAA  
GTGATACTGGCGATCTAGAGAGTGGAAGAGAGAAGTGAATTCTCGGAGTAGCGGTAAAA  
TGCGTAGATCTCGAGAGGAACACCAATGGCGAAGGCAGCTTCTTGGTCCATTTCTGACGT  
TCATGCACGAAAGCGTGGGGAGCAAACAGGATTAGATACCCTAGTAGTCC

>Otu5488

CCAGCCTATGGGTGGCACCAGCCAGGAATATTGCGCAATGGACGAAAGTCTGACGCAGCG  
ACGCCGCGTGGAGGAAGACGGCCTTAGGGTTGTAACTCCTTTTAGAAAGCCGTTACAG  
CTTCTGAATAAGCCTCTACTAACTACGTGCCAGAAGTCTCGGTAATACGTAGGAGGCGA  
GCGTTATCCGGATTTACTGGGCGTAAAGTGTGCGTAGGCGCCCCATTAAGTCGTGCTTTA  
AATACTAAGGCTTACCCTTAGAGCTGAGTACGATACTGTTGGGGTTGAGGATTGACAGGG  
CAGCTGGAACAGTACGTGTAGCAGTGAATGCGTTGATATGTACTGGAACACCAAGGGCG  
AAGGCAGGCTGCTGGGTTTTTTCCTGACGCTGAGGCACGAAAGCTAGGGTAGCGAAACAGA  
TTAGAAACCCCACTAGTCC

>Otu5494

CCAGCCTATGGGTGCTGCAGTAGGGAATATTGCGCAATGGAGGAACTCTGACGCAGCG  
ACGCCGCGTGGGTGATGAAGGTCTTCGGATCGTAAAGCCCTGTTCGGACGGGAAGAAAAAC  
GTTATGGCTAACATCCATAGCGCTTGACGGTACCGTAAGAGGAAGCCCCGGCTAACTTCG  
TGCCAGCAGCCGCGTAATACGAAGGGGGCAAGCGTTGTTTCGGAGTCATTGGGCGTAAAG  
CGCGTGTAGGCGGTCTGTTAAGTCGATTGTGAAATCCCTGGGCTCAACCGAGGAAGTGCA  
GTCGAACTAACAACTAGAAGATGGTAGAGGAAGGTGGAATTCCAGGTGTAGAGGTGAA  
ATTCGTAGATATCTGGAGGAATACCGGTGGCGAAGGCGGCCTTCTGGGCCATTCTTGACG  
CTGAGACGCGAAAGCGTGGGTAGCAAACAGGATTAGAAACCCCTGTAGTCC

>Otu5496

CCAGCCTACGGGGCGCACCACTTGGGAATCTTGCAACAATGGGGGCAACCCTGATGCAGCG  
ACGCCGCGTGGAGGATGAAGGATCTAGGTCTGTAACTCCTTTTGTGGGAAAGACTTAG  
GACGGTACCCAACGAATAAGGACCGGCCAACTACGTGCCAGCAGCCGCGTAAGACGTAG  
GGTCCGAGCGTTGTCCGGATTTACTGGGCGTAAAGAGCGCGTAGGCGGCTCGTTAAGTGT  
GAAGCTAAATCTCCAGGGCTCAACCCGGAACCTATTTTCGCATACTGACGAGCTTGAGGAA  
TGCAGAGGTGAATGGAATTCCTGGTGTAGCGGTGAAATGCGTTGATATCAGGAGGAACAC  
CCATGGCGAAGGCAGTTCACTGGGCATTATCTGACACTGAGGCGCGAAAGCGTGGGTAGC  
AAACAGGATTAGAAACCCCTCGTAGTCC

>Otu5500

CAGCCTATGGGATGCTGCAGTGTGGAATATTGGACAATGAACGACAGTTCGATCCAGCAA  
TATTGCGTGACGGAAGAAGGTCCTTTTACCGTAAATGTCTTTTAGCAAAGTATGAAAATG  
ACAAAATATTGAAGAAGAAGCCCCGACTAACTTCGTGCCAGCAGTCGCGGTAAAACGGGG  
GGGGCTAGTGTTATTCATCATTACTIONGGGTGTAAAACGTGTGAAGATTGCTTTTTAAGTAT  
TTATTAAGATAATCTGAGCATAACTTAGAAGTTAATAAATAGACTATTTAGCTAGAGGTT  
GAAAGGGGTAAAGCTATATTTTCGAGGAAGAGATAAAATTCTTAGATCTTGGGGAAATAAC  
CAGCAGGCGAAAGCCGCTTGCCATGACAACACTGACGTTGTAGCACAAAAGCGTGGGGAT  
CAAACGGGATTAGAAACCCGTGTAGTCC

>Otu5503

CCAGCCTATGGGTTGCAGCAGTCAAGAACTTTCCACAATGGGCGAAAGCCTGATGGAGCG  
ACGCCGCGTGTTGATGAAGTCCTTCGGGACGTAAAGACCTTTTATGGGGGAGGAAGTAA  
TTGACGTTACCCCATGAATAAGGGGCTCCTAACTCTGTGCCAGCAGGAGCGGTAATACAG  
AGGCCCCAAGCGTTATCCGGAATCACTGGGCGTAAAGGGTGTGTAGGCGGTTGTGTTAGT  
CGTCTGTGAAAGACCTTGGGCTTAACCCAGGGGACGCAAACGAAACGGCATGACTTAGAG  
GATGTGAGAGGTACAGGGAACATCATGGTGTAGGGGTGAAATCCGTTGATATCATGGGGAA  
CACCAAATGCGAAGGCACCTGTACTGGCACACTCCTGACGCTGAAACACGAAAGCGTGGA  
ATCGAACGGGATTAGAAACCCCTCGTAGTCC

>Otu5506

CCAGCCTATGGGTCGCAGCAGTCGAGAATCTTCCACAATGGACGAAAGTCTGATGGAGCG  
ACGCCGCGTGACTGATGAAGTCCTTCGGGACGTAAAGGTCTTTTGTGAGGTAGAAAGTTA  
TTGATCGCCTCAAGAATAAGGGGTTGCTAAACTCGTGCCAGCAGCAGCGGTAATACGAGT  
GCCCCAAGCGTTGTCCGGAATTATTGGGCGTAAAGGGTGTGTAGGCGGTTGTGTTAGTCT  
TTTGTAAAGCTCCCGGCTCAACCGGGAAGGTGCAAAAGAAACGGCACAACCTAGAGGGTG  
CGAGAGGTGTACAGAACTCATAGTGTAGGGGTGAAATCCGTTGATATTATGGGGAAATACC  
AAAAGCGAAGGCAGTACACTGGCGCATTCCTGACGCTGAGACACGAAAGCGTGGGTAGCG  
AATGGGATTAGAAACCCGTGTAGTCC

>Otu5507

CCAGCCTACGGGGTGCTCCAGTAAGGAATATTGGTCAATGGGCGGAAGCCTGAACCAGCC  
ATGCCGCGTGCGAGGAAGACGGCCCTACGGGTTGTAAACTGCTTTTGCAGGGGAATAAACC  
CCCGTATGTATACGGGGTTGAATGTACTCTGAGAATAAGGATCGGCTAACTCCGTGCCAG  
CAGCCGCGGTAATACGGAGGATCCGAGCGTTATCCGGATTTATTGGGTTTAAAGGGTGCG  
TAGGCGGCCTGTTAAGTCAGGGGTGAAAGACGGTAGCTTAACCTATCGCAGTGCCTTTGAT  
ACTGACGGGCTTGAATGTAGTTGAGGCAGGCGGAATGTGACAAGTAGCGGTGAAATGCAT  
AGATATGTACAGAACACCGATTGCGAAGGCAGCTGACGAAACTGTAACCTGACGCTGAGG  
CACGAAAGCGTGGGGATCAAAACAGGATTAGAAACCCCTGGTAGTCC

>Otu5508

CCAGCCTACGGGTCGCAGCAGTGAGGGATTTTGCGCAATGGAGGAAACTCTGACGCAGCG  
ACGCCGCGTGCGGGACGAAGCCTTTTCGGGGTGTAACCGCTGTCAGTGGGGAAGAGAATG  
GACGGTACCCACTGAGGAAGCCTCGGCTAACTACGTGCCAGCAGCCGCGGTAAGACGTAG  
GGGCGGAGCGTTGTCCGGAATCACTGGGCGTAAAGAGCTCGTAGGCGGGGTTGCACGTCT  
TGAGTAATCCATCTGCTCAACGGATGGGTCGTCTGAGATACGGCAGCTCTTGAGGACA  
GAAGAGGAGAGCAGAATTCCGGGTGTAGCGGTGAAATGCGTAGATATCCGGAGGAATACC  
AGTGCGAAGGCGGCTTTCTGGTCTGATTCTGACGCTGAGGAGCGAAAGCCAGGGGAGCG  
AACGGGATTAGAAACCCGCGTAGTCC

>Otu5510

CCAGCCTACGGGTCGCTCCAGTCGAGGATCTTCGGCAATGGGCGCAAGCCTGACCGAGCG  
ACGCCGCGTGCGCGATGAAGGCCTTCGGGCTGTAAAGCGCTGTCGAGGGGAAGAAAGCCG  
CAAGGTTGATCGACCCCTGGAGGAAGCACGGGCTAAGTTCGTGCCAGCAGCCGCGGTAAG  
ACGAACCGTGCAAACGTTATTTCGGAATCACTGGGCTTAAAGGGCGCGTAGGCGGACATTC  
AAGTCCGGGGTGAAATCCTCCGGCCTAACCGGAGAATAGCCTTGATACTGGATGTCTCG  
AGGGAGGTAGGGGCGTGCGGAACCTTCGGGTGAGCGGTGAAACGCGTAGATATCGGAAGG  
AACGCCGGTGCGGAAAGCGGCGCGCTGGACCTCTTCTGACGCCGAGGCGCGAAAGCCAGG  
GGAGCGAACGGGATTAGATACCCGCGTAGTCC

>Otu5521

CCAGCCTACGGGTGGCACCAGTGCCAGCAGATCGTGGGTATGCCGCCTTCTTCGAGGTAC  
CAGCGAGTGGCGCGATCATTGACGAAGGTCCACCTTTTGGATCGATGTAGTCCAAGCCG  
AGGATGGCGGGCTGTTTGCCGGTGGTGCGCTGCAGGTAGTCAAGCTCGGAGCGGGGTCCG  
CTCCAGGCTGAGACCTGCTGGCCAGTGAGGGTCTTGTGGCCGTAGATGCTCCAAAGATAG  
GCATAGAGCTTGCGGGCACGAGGGCTCGCATGGGGATTGCTGAGGTGCCTTTTGTGGTG  
AAGTGCCAGGGGAAGATGGAAGCCCGCGCGGAGAGCGACAGAACGGAAGCGGCACCGGCG  
AGAAATGAGCGGCGAGTCGGTGCGGTTGGCAAAGGCATTCTCCGAGGATAGCGACGATAG  
CAAGGTATTAGATACCCTCGTAGTCC

>Otu5525

CCAGCCTATGGGGGGCACCAAGTGGGGAATATTGGACAATGGGGGAAACCCTGATCCAGCG  
ACGCCGCGTGCGTGAAGAAGGCCTGCGGGTTGTAAAGCACTTTCAGTGGGGAGAAAGAG  
TTCAGGTTAATACCTTGATGGATGATGTTACCCACAGAAGAAGCACCGGCTAACTCTGT



GCCAGCAGCCGCGGTAATACGGAGGGTGCGAGCGTTAATCGGAATTACTGGGCGTAAAGG  
GTGCGTAGGTGGTTAAATAAGTTAGGTGTGAAATTCCTGAGCTCAACTTGGGGACTGCGC  
CTGATACTGTTTGGCTAGAGTACTGTAGAGGGAAGTGGAATTTCCGGTGTAGCGGTGAAA  
TGCGTAGATATCGGAAGGAACATCGGTGGCGAAGGCGACTCCCTGGACAGATACTGACAC  
TGAGGCACGAAAGCGTGGGGAGCAAACAGGATTAGAAACCCCCGTAGTCC

>Otu5527

CCAGCCTACGGGGTGCAGCAGTGGGGAATATAGGACAATGGGCGCAAGCCTGATCCAGCC  
ATGCCGCGTGTGTGAAGAAGGCCTTCGGGTGTAAAGCACTTTTGTCCGGAAAGAAATCC  
TGATGGCTAATATCCGTCGGGGATGACGGTACCGGAAGAATAAGCACCGGCTAACTACGT  
GCCAGCAGCCGCGGTAATACGTAGGGTGCGAGCGTTAATCGGAATTACTGGGCGTAAAGC  
GTGCGCAGGCGGTGATGTAAGACCGATGTGAAATCCCCGGGCTTAACCTGGGAACTGCAT  
TGGTGACTGCATCGCTAGAGTATGGCAGAGGGGGGTAGAATTCACGTGTAGCAGTGAAA  
TGCGTAGAGATGTGGAGGAATACCGATGGCGAAGGCAGCCCCCTGGGCCAATACTGACGC  
TCATGCACGAAAGCGTGGGGAGCAAACAGGATTAGATAACCCCTGTAGTCC

>Otu5530

CCAGCCTACGGGGGGCAGCAGTGGGGAATATTGGACAATGGGGGCAACCCTGATCCAGCG  
ATGCCGCGTGTGTGAAGAAGGCCTGCGGGTGTAAAGCACTTTCAGTGATGAGGAAGGCT  
GTTTATCGAATAGATAGACAGATTGACGTTAGTTACAGAAGAAGCACCGGCTAACCCCGT  
GCCAGCAGCCGCGGTAATACGGAGGGTGCGAGCGTTAATCGGAATTACTGGGCGTAAAGG  
GCGCGTAGGTGGTTGTATAAGTCGATTGTGAAATTCCTGGGCTTAACCTAGGCAGGTCAA  
TCGATACTGTATAGCTAGAGTACTGTAGAGGGTAGTGGAATTTCCGGTGTAGCGGTGAAA  
TGCGTAGATATCGGAAGGAACACCGGTGGCGAAGGCGGCTACCTGGACAGATACTGACAC  
TGAGGCGCGAAAGCGTGGGTAGCGAACAGGATTAGAAACCCGAGTAGTCC

>Otu5532

CCAGCCTATGGGGGGCAGCAGTGGGGAATATTGGACAATGGGGGAAACCCTGATCCAGCC  
ATGCCGCGTGAGTGATGAAGGCCTTAGGGTGTAAAGCTCTTTTGTGAGGGAAGATGATG  
ACGGTACCTGAAGAATAAGCACCGGCTAACTTCGTGCCAGCAGCCGCGGTAATACGAAGG  
GTGCTAGCGTTGTTTCGGAATCACTGGGCGTAAAGCGCGCGTAGACGGTTTTGTAAAGTCAG  
ATGTGAAATCCCCGGGCTCAACCTGGGAACTGCATTTGAGACTGCATGGCTAGAGTATCG  
AAGAGGGAAGTGGAATTTCCGGTGTAGCGGTGAAATGCGTAGATATCGGAAGGAACACCA  
GTGGCGAAAGCGACTTCCTGGTCAATACTGACGTTTCATGTGCGAAAGCGTGGGGAGCAA  
ACAGGATTAGATAACCCCTGGTAGTCC

>Otu5541

CCAGCCTACGGGTTGCACCAGTGGGGAATTTTGGACAATGGGGGGAACCCTGACGCAGCA  
ACGCCGCGTGAGTGAGGAAGGCCTTCGGGTGTAAAGCTCTTTCGGCTGGGAAGAAGGGA  
ACTGGAGTTAATAAGTTCAGTTTTTGTATGGTACCAGAAGAAGAAGCACCGGCAAACCTTCG  
TGCCAGCAGCCGCGGTAATACGAAGGGTGCAAGCATTGTTTCGGAATTATTGGGCGTAAAG  
GGTTCGTAGGCGGGAGAACAAGTCAAGTGTGAAATATCTAGGCTAAACCTAGAAAGTGCA  
TTTGAAACTGTTTTTCTTGAGTGTTAGAGAGGGTGGTGGAATTGCTGGTGTAGGAGTGAC  
ATCCGTAGAGATCAGCAGGAACATCGGAGGCGAAGGCGGCCACCTGGCTAAATACTGACG  
CTGAGGAACGAAAGCATGGGGAGCAAACAGGATTAGAAACCCGGGTAGTCC

>Otu5542

CCAGCCTATGGGAGGCTGCAGTGGGGAATATTGGACAATGAACGAAAGTTTGATCCAGCT  
ATATTGCGTGAGTGACGAGTTATTAAGATTAAATAATCCGAAGGTCTCGAATTGTAAAC  
TCTTTTATAAGTGAAAATAATGATATTAACCTATGAATAAGTACCGGCTAACTTCGTGCC  
AGCAGCCGCGGTAAAACGGAGGGTACAAGTGTTATTTCGTGATAACTGGGCGTAAAGGATA  
TGTAGGTGGTTTTACCCGTAATTTGTAAAAAACTGGAATTTAATTTCTTGAGTGCGAATT  
AAACCGTAAACTAGAGTATAAAAGAGGTTAGCAGTACTAATATTGTAAAGTTGGAATTT  
GTTGATAATATTAGGACTATCAATTGGCGAAGGCGGCTAACTGGGTATGACTGACACTG  
AGATATGAAAGCATAGGTAGCAAAGAGGATTAGATAACCCCGTAGTCC

>Otu5545

CCAGCCTATGGGGGGCTGCAGTCGAGAATCTTTCGCAATGGGCGAAAGCCTGACGAAGCG  
ACGCTGTGTGTGCGATGAAGGCCTTCGGGTGTAAAGCACTTTCGCTTAGGAACAAGAGA  
GGCCGGCTAATATCCGGCCGATTTGAGGGTACTAGGTAAAGAAGCACCGGCTAACTACGT  
GCCAGCAGCTGCGGTAATACGTAGGGTGCAAGCATTAATCGGATTTATTGGGCGTAAAGG  
GCGCGTAGGCGGGATCATAAGTCAGATGTTAAAGCCCCGGGGCTCAACCCCGGAAAAGCAT  
TTGAAACTGTAATCCTAGAGGGTAGGCGGAGAAAATGGAAATCCACAAGTAGCGGTGAAA  
TGCGTAGATATGTGGAAGAACACCGGTGGCGAAGGCGGTTTTCTAGCTTATACCTGACGC

TGAAGCGCGAAAAGCAAAGGGAGCAAACAGGATTAGAAAACCCCGGTAGTCC

>Otu5565

CCAGCCTACGGGTCGCTCCAGTGGGGAATCTTGCGCAATGGGCGAAAGCCTGACGCAGCA  
ACGCCGCGTGGGGGACGAAGGCTTTCTGAGTTGTAAACCCCTTTTCAGCAGGAACGATAGT  
GACGGTACCTGCAGAAGAAGCACCGGCCAACTACGTGCCAGCAGCCGCGGTGATACGTAG  
GGTGC AAGCGTTGTCCGGATTATTG GGGCGTAAAGAGCTCGTAGGCGGTTTGATAAGTCG  
GATGTGAAACCCCGAGGCTTAACCTGGGGCCGCCATTTCGATACTGTCATGGCTAGAGTCC  
GGTAGGGGACCATGGAATTCCTGGTGTAGCGGTGAAATGCGCAGATATCAGGAGGAACAC  
CAGTGGCGAAGGCGGTGGTCTGGGCCGGAAC TGACGCTGAGGAGCGAAAGCGTGGGGAGC  
GAATAGGATTAGATACCCTCGTAGTCC

>Otu5579

CCAGCCTATGGGTCGCTGCAGTTTTCGAATCATT CACAATGGGCGAAAGCCTGATGGTGCG  
ACGCCGCGTGAGGGATGAAGGCCTTCGGGTGTAAACCTCTGTCACCGGGGAAGAAACGC  
TTCAAGTTAACAGCCTGAAGCCTGACTTAACCCGGAGAGGAAGCAGTGGCTAACTCTGTG  
CCAGCAGCCGCGGTAATACAGAGACTGCGAGCGTTACTCGGATTCACTGGGCGTAAAGGG  
TGCGCAGGCGGCCAGGTGTGTGAGGCGTGAAAGCCCGGGGCTTAACCCCGGAATTGCACC  
TCAAACCTACATGGCTAGAGTATTGGAGAGGGTAACGGAATTCACGGTGTAGCAGTGAAAT  
GCGTAGATATCTGAGGAACACCAGAGGCGAAGGCGGTTACCTGGACAATTACTGACGCT  
CAGGCACGAAAGCGTGGGTAGCAAACAGGATTAGAGACCCTCGTAGTCC

>Otu5581

CCAGCCTATGGGGGGCTGCAGTAGGGAATATTGCGCAATGGAGGAACTCTGACGCAGCG  
ACGCCGCGTGGGTGACGAAGGCCTTCGGGTGCTAAAGCCCTGTCGGAAGGGACGAAAAAT  
AGAATGGCTAATATCCATTTTACTTGACGGTACCTTTAAAGGAAGCACCGGCTAACTACG  
TGCCAGCAGCCGCGGTAATACGTAGGGTGCGAGCGTTGTTCCGAATCATTTGGGCGTAAAG  
CGCGTGTAGGCGGCTAAATAAGTTCAGTGTGAAATCCCTGGGCTCAACCGAGGAAGTGCA  
TTCGAAACTGTTTAGCTAGAGGACGGTAGAGGAAGGTGGAATTCCTAGTGTAGAGGTGAA  
ATTCGTAGATATTAGGAGGAATACCGGTGGCGAAGGCGGCCTTCTGGGCCGTTCTTGACG  
CTGAGACGCGAAAGCGTGGGGAGCAAACAGGATTAGATACCCTCGTAGTCC

>Otu5585

CCAGCCTATGGGAGGCAGCAGTGGGGAATATTGCGCAATGGGCGAAAGCCTGACGCAGCG  
ACGCCGCGTGAGGATGAAGGTTTTTGGATTGTAAACTCCTGTTAAGTGGGAAGAAAGTC  
CTATTTCTAATAAATATAGGCTATGACGGTACCCTAGAGAAAGCACCGGCTAACTTCGT  
GCCAGCAGCCGCGGTAATACGAGGGGTGCAAGCGTTATTTCGGATTTATTGGGCGTAAAGG  
GTGCGTAGACGTTTGTAAAGTCTGTTGTAAATTCTCCGACCTAATCGGAGGTAGGCGA  
TGGAACCTGGCGGACTAGAGTGTGGGAGAGAGAAGTGGAATTCCTGGGGTAGCGGTAAAA  
TGCACAGATATCGGGAGGAACACCAATGGCGAAGGCAGCTTCTTGGCCATAACTGACGT  
TGAGGCACGAAAGCGTGGGGAGCAAACAGGATTAGAGACCCGCGTAGTCC

>Otu5586

CCAGCCTACGGGATGCTGCAGTCGAGAATTTTTCTCAATGGGCGAAAGCCTGAAGGAGCG  
ACGCCGCGTGTGCGATGAAGGCCTTCGGGTGTAAAGCACTGTGAGGGGGAGAAAGGTC  
CGCAAGGGCTTGATCTATCCCTGGAGGAAGCACGGGCTAAGTTTCGTGCCAGCAGCCGCGG  
TAAGACGAACCGTGCGAACGTTGTTCCGAATCACTGGGCTTAAAGGGCGCGTAGGCGGGT  
CTTCAAGTCAGGAGTGAAATCCTTCGGCTCAACCGGAGAAGCGCTTTTGATACTGGAGAC  
CTCGAGGGGTGTAGGGGCATGTGGAACCTCCGGTGGAGCGGTGAAATGCGTAGATATCGG  
AAGGAACGCCGTTGGCGAAAGCGACGTGCTGGACACCTACTGACGCTGAGGCGCGAAAGC  
CAGGGGAGCAAACGGGATTAGATACCCCGTAGTCC

>Otu5592

CCAGCCTATGGGGGGCAGCAGTGGGGAATATTGGACAATGGGGGCAACCCTGATCCAGCA  
ATGCCGCGTGTGTGAAGAAGGCCTTAGGGTTGTAAAGCACTTTCAGTGGGGAGAAGGTTT  
TAAGTGCTAATACCATTTAAAGTTGATGTTACCCACAGAAGAAGCACCGGCTAACTCTGT  
GCCAGCAGCCGCGGTAATACAGAGGGTGCGAGCGTTAATCGGAATTACTGGGCGTAAAGG  
GTGTGTAGGTGGTTAGGTAAGTTAGATGTGAAATCCCCGGGCTCAACCTGGGAATTGCGT  
TTAAAACCTGTTTAGCTAGAGTATTGTAGAGGATAGTGGAATTTCCAGTGTAGCGGTGAAA  
TGCGTAGATATTGGAAGGAACACCAAGTGGCGAAGGCGACTATCTGGGCAAATACTGACAC  
TGAGACACGAGAGCATGGGGAGCAAACAGGATTAGAAAACCCTAGTAGTCC

>Otu5597

CCAGCCTATGGGGGGCTGCAGTCGAGAATTTTTCTCAATGGGCGAAAGCCTGAAGGAGCG  
ACGCCGCGTGGGGGATGAATGGCTTCGGCCGTAACCCCTGTCATTTGCGAACAAACCT

GTTACCTAACACGTGAACAGCTGATTGTAGCGAAAGAGGAAGGGACGGCTAACTCTGTG  
CCAGCAGCCGCGGTAATACAGAGGTCCCAAGCGTTGTTTCGGATTCACTGGGCGTAAAGGG  
TGCGTAGGTGGTGAGGTAAGTCTTATGTGAAAGCTCGGAGCTTAACTCCGAAATGGCATA  
GGAAACGACCTTGCTGGAGGGTTGGAGGGGGGACTGGAATACTTGGTGGAGCAGTGAAAT  
GCGTAGATATCAAGTGGAACACCAGTGGCGAAGGCGAGTCCCTGGACAACCTCTGACACT  
GAGGCACGAAAGCTAGGGGAGCAAACGGGATTAGATACCCTCGTAGTCC

>Otu5599

CCAGCCTACGGGGGGCAGCAGTCGAGAATTTTTCTCAATGGGGGAAACCTGAAGGAGCG  
ACGCCGCGTGAGGATGAAGGTCTTCGGATTGTAACTCCTGTCATTTGGGAACAATTGT  
TGGTCATTAACTGTGATCAGCTTGATAGTACCAGAAGAGGAAGAGACGGCTAACTCTGTG  
CCAGCAGCCGCGGTAATACAGAGGTCTCAAGCGTTGTTTGGATTCAATTGGGCGTAAAGGG  
TGCGTAGGTGGCGAGGTTAGCCAGGTGTGAAATCTCGGGGCTCAACCCCGAACTGCACT  
TGATACTGCCTTGCTAGAGTACTGAAGAGGAGATTGGAATTTACGGTGTAGCAGTGAAAT  
GCGTAGATATCGTAAGGAAGACCAGTGGCGAAGGCGAATCTCTGGACAGTTACTGACACT  
GAGGCACGAAGGCCAGGGGAGCAAACGGGATTAGATACCCCGTAGTCC

>Otu5604

CCAGCCTACGGGAGGCAGCAGTAGGGAATCTTCCACAATGGGCGAAAGCCTGATGGAGCA  
ACGCCGCGTGACAGGACGAAAGCCTTCGGGTGTAACTGCTTTTATCTGTGACGAATATG  
ACGGTAGCAGATGAATAAGGATCGGCTAACTCCGTGCCAGCAGCCGCGGTCATACGGAGG  
ATCCAAGCGTTATCCGGAATTACTGGGCGTAAAGAGTTGCGTAGGTGGCATGGTAAGTTG  
ATGGTGAATCCTGGGGCTCAACCCCTTACCCATTATCAAACTGCCAGGCTAGAGGATG  
AGAGAGGTTATTGGAATTCCTAGTGTAGGAGTGAGATCCGTAGATATTAGGAGGGACACC  
GATGGCGTAGGCAGGTTACTGGCTCGTTTCTGACACTAAGGCACGAAAGCGTGGGGAGCA  
AACGGGATTAGAAACCCTTG TAGTCC

>Otu5608

CCAGCCTATGGGTTGCTCCAGTCGAGAATCTTTCGCAATGGGCGAAAGCCTGACGAAGCG  
ACGCCGCGTGAGCGAAGAAGGCCTTCGGGTGTAAAGCTCTTTCGCTAGGGAACAAGGAA  
TATGGGATAACACCCCGTAACTTGAGGGTACTTGGTAAAGAAGCACCGGCTAACTCCGT  
GCCAGCAGCTGCGGTAATACGGAGGGTGCAAGCATTGATCGGAATTACTGGGCGTAAAGG  
GCGCATAGGCGGCACAGAAAGTCAGATGTGAAATTCTCGGGGCTCAACCCCGGAACTGCA  
TTTGAAACTCCTGAGCTAGAGGATGGTTAGGGAAAACGGAATTCCACGTGTAGCGGTGAA  
ATGCGTAGATATGTGGAAGAACACCGGTGGTGAAGACGGTTTTCTGGGCCAAACCTGACG  
CTGAGGCGCGAAAGCTAGGGGAGCAAACAGGATTAGAAACCCAGTGGTCC

>Otu5610

CCAGCCTATGGGTCGCAGCAGTTTCGAATCATTACCAATGGACGAAAGTCTGATGGAGCG  
ACGCCGCGTGAGGATGAAGGTTTTTCGGATTGTAACTCCTGTCCTGACGAGAACAAGGCT  
GCGCGATTGAACATTTTCGCGCAGTTGATGGTATGCGGAGAGGAAGGGACGGCTAACTCTG  
TGCCAGCAGCCGCGGTAAGGCAGAGGTCCCGAGCGTTGTTTCGGATTCAATTGGGCGTAAAG  
GGTGTGTAGGAGGCCAGGTAAGTCAGGTGTGAAATCTCAGAGCTTAACTCTGAACTGCG  
CTTGATACTGCTTGGCTCGAGGATCGGAGGGGGTATCGGAATTTATGGTGTAGCAGTGAA  
ATGCGTAGATATCATAAGGAACACCGGTGGCGAAGGCGGATACCTGGAAGATTCTCTGACT  
CTGAAACACGAAAGCCAGGGGAGCAAACGGGATTAGATACCCTCGTAGTCC

>Otu5616

CCAGCCTACGGGGGGCAGCAGTCGAGGATCTTCGTCAATGGGCGCAAGCCTGAACGAGCG  
ACGCCGCGTGTCGATGAAGGCCTTCGGGTGTAAAGCACTGTGAGGGGGATAAAGGCC  
GCAAGGCTTGATCGATCCCTGGAGGAAGCACGGGCTAAGTTCGTGCCAGCAGCCGCGGTA  
AGACGAACCGTGCGAACGTTGTTTCGGAATCACTGGGCTTAAAGGGCGCGTAGGCGGCAGG  
CGAGGTCGGGGGTGAAATCCCACAGCTTAACTGTGGAAGAGCCTTCGATACCGGCTTGCT  
GGAGGAAGGTAGGGGTGCGCGGAACCTTCTGGTGGAGCGGTGAAATGCGTTGATATCAGAA  
GGAACGCCGGTGGCGAAAGCGACGTGCTGGACCTTCTCTGACGCTGAGGCGCGAAAGCTA  
GGGGAGCAAACGGGATTAGAGACCCGCGTAGTCC

>Otu5626

CCAGCCTACGGGGGGCTCCAGTGGGGAATATTGGGCAATGGGCGCAAGCCTGACCCAGCC  
ATGCCGCGTGAGTGATGAAGGCCTTCGGGTGCTAAAGCTCTGTGGGGAGGGACGAAACAG  
TTCGTGGCCAACACCCACGAACCTTGACGGTACCTCCTTAGCAAGCACCGGCTAACTCCG  
TGCCAGCAGCCGCGGTAATACGGAGGGTGCAAACGTTGCTCGGAATCAATTGGGCGTAAAG  
CGCACGTAGGCGGCTCCTCAAGTCGGATGTGAAAGCCCTGGGCTCAACCCAGGAAGTGCA  
TTCGAAACTGGCGAGCTTGAATATGGAAGAGGGTTCGCGGAATTCCCGGTGTAGAGGTGAA

ATTCGTAGATATCGGGAGGAACACCAGTGGCGAAGGCGGCGACCTGGGCCAATATTGACG  
CTGAGGTGCGAAAGCGTGGGGAGCAAACAGGATTAGATACCCTCGTAGTCC  
>Otu5628  
CCAGCCTATGGGGCGCAGCAGTGGGGAATATTGGACAATGAGCGCAAGCTTGATCCAGCA  
ATATCGCGTGAATGACTACAGCCTGGATGGTTTTAAAGTCTTTTGATGGATTATTATAA  
TGATTGTATCCATAGAATAAGTCCCGCTAACTTCGTGCCAGCAGCCGCGGTAAAACGGG  
GGGGACTAGCGTTATTTCGTCAATTATTGGGCGTAAAGGGCAATTAGACGGTTAAAAAGTT  
TTGAGTTAAATTTAAGAGAAAAGTATATCTCGGTTTCAGCTTGAAATACTTTTGGCTAGAG  
TGCAATAGAGGATGAAAGTACTTTTCAGTGTAAGGTGAAATTTGACGATATTGAAGGGAC  
TCCCTACAGGCGAAGGCGTTCATCTGGGTGTTACTGACGTTACAGGCGAAAGCGTGGG  
GAGCAAACAGGATTAGAGACCCTAGTAGTCC  
>Otu5639  
CCAGCCTACGGGACGCAGCAGTAGGGAATATTGCGCAATGGAGGAACTCTGACGCAGCG  
ACGCCGCGTGGGTGATGAAGGCCCTTCGGGTCGTAAAGCCCTGTCGGTAGGGAAGAAAAAC  
GAGGTGGCTAACATCTATCTCGCTTGACGGTACCTGCAGAGGAAGCACCGGCTAACTACG  
TGCCAGCAGCCGCGGTAATACGTAGGGTGCTAGCGTTGTTTCGGAATCATTGGGCGTAAAG  
CGCGTGTAGGTGGTTATTTAAGTCGAGTGTGAAATCCCTAGGCTTAACCTAGGAAGTGCA  
TTCGAACTAATTAGCTAGAAGACGGTAGAGGAAGGTAGAATTCCTAGTGTAGAGGTGAA  
ATTCGTAGATATTAGGAGGAACACCGGTGGCGAAGGCGGCCCTTCTGGACCGTTCTTGACA  
CTGAGACGCGAAAGCGTGGGTAGCAAACAGGATTAGAAACCCGCGTAGTCC  
>Otu5640  
CCAGCCTACGGGGGGCAGCAGTCGAGAATCTTTCGCAATGGGCGCAAGCCTGACGGAGCG  
ACGCTGTGTGAGTGATGAAGGCCCTTCGGGTGTAAAGCTCTTTCGCTGGGGAACAAGGGA  
GGAAGAAGAATACTCTTCTAACTTGAGGGTACCCGGTAAAGAAGTACCGGCTAACTACGT  
GCCAGCAGCTGCGGTAATACGTAGGGTACAAGCATTAATCGGATTTACTGGGCGTAAAGG  
GTGCGTAGGCGGATAGACAAGTCAGGTGTGAAATTCGGTACTCAATACCGGAGCTGCAC  
TTGAACTATCTTCTAGAGGTCAGGCGGAGGAAACGGAATTCATGTGTAGCGGTGAAA  
TGCGTAGATATATGGAAGGACACCTGTGGCGAAAGCGGTTTCCTAGCTTGATTCTGACGC  
TGATGCACGAGAGCGTGGGTAGCAAACAGGATTAGAAACCCCTCGTAGTCC  
>Otu5654  
CCAGCCTATGGGATGCACCAGTTTGGAAATTTTGGACAATGGGCGAAAGCCTGATCCAGCG  
ACGCCGCGTGGACGATGAAGGTCTTCGGATCGTAAAGTCCTTTTAGTAGGGAACAATTTT  
TGAGCGTACCTACAGAATAAGAGGTTGCTAACTCTGTGCCAGCAGCAGCGTAATACAGA  
GACCTCGAGCGTTATCCGGAATCATTGGGCGTAAAGCGTACCGATCGGTTGTTTTGAAAG  
TCAGAGGTGAAATCACAAAGCTCACTTTGTGACTGTCTTTGAACTTCAAACTAGAG  
GGGCAAAGAGGAAGCTGGAACAAACGGTGTAGTAGTGAAATGCGTTGATATCGTTTGAA  
CACCAATAGCGAAGGCAGGCTTCTGGGTGCCACCTGACACTGCTAGGACGAAAGCGTGGG  
GAGCGAATGGGATTAGAAACCCCTGGTAGTCC  
>Otu5655  
CCAGCCTACGGGAGGCACCAGTCGAGAATTTTTCTCAATGGGCGAAAGCCTGAAGGAGCG  
ACGCCGCGTGGGGGATGAAGGGCTTCGGCCCGTAAACCCCTGTCATTTGCGAACAAACCT  
TGCGTTTTTAATAAAGCGCAAGCTGATTGTAGCGAAAGAGGAAGGGACGGCTAACTCTGTG  
CCAGCAGCCGCGGTAATACAGAGGTCCCAAGCGTTGTTTCGGAATCACTGGGCGTAAAGGG  
TGCGTAGGTGGCTGGGTAAGTTTGATGTGAGATCTCCGGGCTTAACCCGGAACCGGCATT  
GAATACTATCCAGCTGGAGGTTTGGAGGGGGGACTGGAATTCCTCGGTGTAGCAGTGAAAT  
GCGTAGATATCGAGAGGAACACCAGTGGCGAAGGCGAGTCCCTGGACAAAACCTGACACT  
GAGGCACGAAAGCTAGGGGAGCAAACAGGATTAGAGACCCTTGTAGTCC  
>Otu5656  
CCAGCCTATGGGTTGCAGCAGTGGGGAATTTTGGACAATGGGGGCAACCCTGACCCAGCA  
ATGCCGCGTGAGTGAAGAAGGCCCTTCGGGTGTAAAGCTCTTTTGTCAGGGAAGAAACGG  
GTGCTCTAATATAGATATCTAATGACGGTACCTGAAGAAGAAGCACCGGCTAACTCTGT  
GCCAGCAGCCGCGGTAATACAGAGGTGCGAGCGTTAATCGGAATTACTGGGCGTAAAGC  
GCGCGTAGACGGTTTTGTAAAGTCAGATGTGAAATCCCTGGGCTCAACCTGGGAACTGCAT  
TTGAGACTGCATGGCTAGAGTATCGAAGAGGGAAGTGGAATTTCCAGTGTAGCGGTGAAA  
TGCGTAGATATCGGAAGGAACACCAGTGGCGAAAGCGACTTCCTGGTTCGAATACTGACGT  
TCATGTGCGAAAGCGTGGGGAGCAAACAGGATTAGAAACCCCTCGTAGTCC  
>Otu5657  
CCAGCCTATGGGGTGCTCCAGTCGAGAATCTTCCGCAATGGACGAAAGTCTGACGGAGCG

ACGCCGCGTGATTGATGAAGACCCTATGGGTCGTAAAGATCTTTTATGAGGGAAGAAAGTT  
TATTGACGGTACCTCATGAATAAGAGGCTCCTAATCTCGTGCCAGCAGGAGCGGTAATAC  
GAGAGCCTCGAGCGTTATCCGGAATTATTGGGCGTAAAGGGTGCGTAGGTGGCGTTGTTA  
GTCGAATGTTAAATCTCCGAGCTTAACCTTGAAACCGCATTCGAAACGGCAATGCTAGAG  
AGGAGAAGAGGTATGCAGAACTCAAGGTGTAGGGGTGAAATCCGTTGATATCTTGGGGAA  
TACCAAAAGCGAAGGCAGCATACTGGTCTCTTTCTGACACTGAAGCACGAAAGCGTGGGT  
AGCGAATGGGATTAGAGACCCCTGTAGTCC

>Otu5663

CCAGCCTACGGGTCGCTGCAGTGGGGAATATTGGACAATGGGCGAAAGCCTGATCCAGCA  
ATGCCGCGTGAAATGATGAAGGCCTTAGGGTTGTAAAGTTCTTTTAGCAGGGAAGATAATG  
ACGGTACCTGCAGAAAAAGCCCCGGCTAACTCCGTGCCAGCAGCCGCGGTAAGACGGAGG  
GGGCTAGCGTTGTTTCGGAATTACTGGGCGTAAAGAGCGCGTAGGCGGTTTGGTAAGTTGG  
AAGTGAAATCCCCGGGGCTTAACCTCGGAATTGCTTTCAAACTGCCAGGCTAGAGTGTAG  
TAGGGGATGATGGAATTCCTAGTGTAGAGGTGAAATTCTTAGATATTAGGAGGAACACCG  
GTGGCGAAGGCGGTCATCTGGGCTACAACCTGACGCTGATGCGCGAAAGCGTGGGGAGCAA  
ACAGGATTAGAGACCCCAGTAGTCC

>Otu5673

CCAGCCTATGGGTGGCAGCAGCAACGAATATTCCGCAATGGGCGAAAGCCTGACGGAGCG  
ACGCCGCGTGTTGGGATGAAGTCCTTCGGGATGTAAACCACTGTCAGGGGCTACCAAGATC  
TGAGGAGCCCCAGAGGAAGCCACGGCTAACTCTGTGCCAGCAGCCGCGAGTAAGACAGAGG  
TGGCTAGCGTTGTTTCGGAATCATTTGGGCTTAAAGCGCACGTAGGCGGCCCTTCAAGTGTC  
TTGTGAAATCCCTCGGCTCAACCGAGGAATGGCTGGGCATACTGTCGGGCTTGAGGCAGG  
TATGGGCGAGTGGAATCTTGGTGGAGCGGTGGAATGCGTAGATATCAAGAGGAACGCCG  
GTGGTGAAGACGACTCGCTGGGCTGTCTGACGCTGAGGTGCGAAAGCCAGGGGAGCAA  
ACGGGATTAGAAACCCGAGTAGTCC

>Otu5674

CCAGCCTATGGGTGCACCAGTGGGGAATATTGGACAATGGGGGCGACCCTGATCCAGCCA  
TGCCGCGTGGGTGAAGAAGGCCTTCGGGTTGTAAAGCCCTTTTGTACGGGAAGAAAAGCA  
GCCGGTTAATAACTGGTTGTGCTGACGGTACCGTAAGAATAAGCACCGGCTAACTTCGTG  
CCAGCAGCCGCGGTAATACGAAGGGTGCAAGCGTTACTCGGAATTACTGGGCGTAAAGCG  
TGCGTAGGTGGTGGTTTAAAGTCTGATGTGAAATCCCCGGGCTCAACCTGGGAATGGCATT  
GGATACTGGGTCCTAGAGTGCGGTAGAGGGTGGTGGAAATCCCCGGTGTAGCAGTGAAT  
GCGTAGAGATCGGGAGGAACATCTGTGGCGAAGGCGGCCACCTGGACCAGCACTGACACT  
GAGGCACGAAAGCGTGGGGAGCAAACAGGATTAGAAACCCGCGTAGTCC

>Otu5678

CCAGCCTATGGGTGGCTCCAGTGGGGAATATTGGACAATGGGGGCAACCCTGATCCAGCC  
ATGCCGCGTGAGTGATGAAGGCCTTCGGGTTGTAAAGCTCTTTTGGCGGGGACGATGATG  
ACGGTACCCGCGAGAATAAGCTCCGGCTAACTTCGTGCCGGCAGCCGCGGTAATACGAAGG  
GAGCTAGCGTTGTTTCGGAATTACTGGGCGTAAAGGGCGCGTAGGCGGCTTGGCAAGTTGG  
GTGTGAAAGCCCAGGGCTCAACCTGGAATAGCACTCAAGACTGCCTTGCTTGAATTCGG  
TAGAGGTTGGTGGAAATTCACAGTGTAGAGGTGAAATTCTGTAGATATTGGGAAGAACACCG  
GTGGCGAAGGCGGCTCACTGGCCCGTAACCTGACGCTCAGGCGCGACAGCGTGGGGATCAA  
ACAGGATTAGAGACCCCGGTAGTCC

>Otu5681

CCAGCCTACGGGGCGCAGCAGTGGGGAATCTTGACAATGGGGGCAACCCTGATGCAGCG  
ACGCCGCGTGAGCGATGAAGCCCTTCGGGTTGTAAAGCTCTTTTCGGCAGGGACGATAATG  
ACGGTACCTGAAGAAGAAGCTGCGGCTAACTACGTGCCAGCAGCCGCGGTAATACGTAGG  
GTGCAAGCGTTGTCCGGAATTATTGGGCGTAAAGAGCGTGTTAGGCGGTCCGATCAGTCCG  
CTGTGAAAGTCCAGGGCTCAACCTGGGATGCCGGTGGATACTGTGCGACTAGAGTCCGG  
AAGAGGCGAGTGGAATTCCTGGTGTAGCGGTGAAATGCGCAGATATCAGGAGGAACACCA  
ATGGCGAAGGCAGCTCGCTGGGACGGTACTGACGCTGAGACGCGGAAGCGTGGGGAGCAA  
ACAGGATTAGAAACCCCAGTAGTCC

>Otu5690

CCAGCCTACGGGACGCAGCAGTTTCGGAATATTCCGCAATGGGCGAAACCCTGATGCAGCG  
ACGCCGCGTGAGCGATGGAGCCCCTCGGGGTGTAAAGCTCTTTTCGGCAGGGAAGATAATG  
ACGGTACCTGCAGAAGCAGCTGCGGCTAACTACGTGCCAGCAGCCGCGGTAATACGTAGG  
CAGCAAGCGTTGTTTCGAGTTACTGGGCGTAAAGGGTGTGTAGGCGGCTCTCTAAGTTTG  
GTGTGAAATCTCCCGGCTCAACCGGGAGGGTGCGCCGAATACTGAAGGGCTAGAGTGCGG

GAGAGGAAAGTGGAAATTCCTGGTGTAGAGGTGAAATGCGTAGATATCAGGAGGAACACCG  
GTGGTGTAGACGGCTTTCTGGACCGTAACCTGACGCTGAGACACGAAAGCGTGGGTAGCAA  
ACAGGATTAGAAACCCCTGGTAGTCC

>Otu5694

CCAGCCTATGGGTTGCTGCAGTCGAGAATCTTTCGCAATGGGCGAAAGCCTGACGAAGCG  
ACGCCGTGTGAGCGAAGAAGGCCTTTGGGTGTAAAGCTCTTTCGCCGGGGAACAAGGAA  
CTAAAGTGAATAACTTTGGAACCTTGAGGGTACTCGGTAAAGAAGCACCGGCTAACTCCGT  
GCCAGCAGCTGCGGTAATACGGAGGGTGCAAGCATTAAATCGGATTTATTGGGCGTAAAGG  
GCGCGTAGGCGGGAATTAAGTCAGGTGTGAAATCCCAAGGCTCAACCTTGGAACGGCAC  
TTGATACTGCTTTTCTTGAGGGTAGACGGAGAAAGTGGAAATTCACAAGTAGCGGTGAAA  
TGCGTAGATATGTGGAAGAACACCAGTGGCGTAGGCGACTTCTAGTTTATACCTGACGC  
TGAGGCGCGAAAGCTAGGGGAGCAAACAGGATTAGAAACCCAGTAGTCC

>Otu5699

CCAGCCTATGGGTCGCTGCAGTGGGGAATATTGGACAATGGGCGCAAGCCTGATCCAGCA  
ATGCCGCGTGAGTGAAGAAGGCCTGAGGGTTGTAAAGCACTTTCGGTGGGGAGGAGTTTA  
TTTTGGTTAAGAGCTAGGATAAAGGACGTTACCCACATAAGAAGCACCGGCTAACTCTGT  
GCCAGCAGCCGCGTAATACGGAGGGTGCGAGCGTTAATCGGAATTACTGGGCGTAAAGG  
GTGCGTAGGTGCTTTGATAAGTTAGCTGTGAAAGACCTGGGCTTAACCTGGGGGTGTCAG  
CTAAGACTGTTGGACTCGAGTATGGGAGAGGGTAGTGGAATTTCCGGTGTAGCGGTGAAA  
TGCGTAGAGATCGGAAGGAACACCAGTGGCGAAGGCGGCTACCTGGCCTAATACTGACAC  
TGAGGCACGAAAGCTAGGGGAGCAAACAGGATTAGAAACCCCTTGTAGTCC

>Otu5700

CCAGCCTATGGGTCGCTGCAGTGGGGAATATTGGACAATGGGCGCAAGCCTGATCCAGCA  
ACGCCGCGTGAGTGATGAAGGCCCTCGGGTCGTAAAGCTCTTTCGGAAGGGACGAAACTG  
GTCCGGGATAATAAACCGGGCTCCTGACGGTACCTTAAGAAGAAGCACCGGCTAACTCTG  
TGCCAGCAGCCGCGTAATACAGAGGGTGCAAGCGTTGTTTCGGAATTATTGGGCGTAAAG  
CGCGTGTAGGCGGCCAAGCATGTGCGGGTGTGAAAGCCCTGGGCTTAACCCAGGAAGTGCG  
CCCGAAACTACTTGGCTTGAGTGTGCGGAGAGGATGGCGGAACTCCCGGTGTAGAGGTGAA  
ATTCGTAGATATCGGGAAGAACACCAGTGGCGAAGGCGGCCATCTGGACGATAACTGACG  
CTGAGACGCGAAAGCGTGGGGAGCAAACAGGATTAGAAACCCCGGTAGTCC

>Otu5707

CCAGCCTATGGGGCGCAGCAGTGAGGAATATTGCACAATGGGCGAAAGCCTGATGCAGCG  
ACGCCGCGTGAGGATGACGGTCTTCGGATTGTAAACTCCTGTTAAGTGGGAAAAAGAA  
TTGCTGTTAATAGCAGCGAGAGATGATGGTACCCTAGAGAAAGCGCCGGCTAACTTCGT  
GCCAGCAGCCGCGTAATACGAGGGGTGCAAACGTTATTTCGGAATCACTGGGCGTAAAGG  
GTGTGTAGACGGCGAAACAAGTCAGTTATAAAATCTCTTGGCTTAACCAAGAACCTGTAA  
CCGAAACTGTTTTGCTTGAGGATGGAAGAGAGAAGCGGAATTCTCGGAGTAGCGGTAAAA  
TGCGTAGATCTCGAGAGGAACACCGATGGCGAAGGCAGCTTCTTGGTCCATTTCTGACGT  
TGAGACACGAAAGCGTGGGGAGCAAACAGGATTAGATAACCCGTGTAGTCC

>Otu5714

CCAGCCTACGGGTGGCTGCAGTGGGGAATCTTGCGCAATGGGCGAAAGCCTGACGCAGCC  
ATGCCGCGTGAGTGATGACGGCCTTAGGGTTGTAAAGCTCTTTCGCTAGGGACGATAATG  
ACGGTACCTAGACAAGAAGCCCCGGCTAACTTCGTGCCAGCAGCCGCGGTAATACGAAGG  
GGGCTAGCGTTGTTTCGGAATTACTGGGCGTAAAGCGCGTGTAGGCGGGCGTTTAAGTCAG  
GGGTGAAATGCCAAGGCTCAACCTTGGAAGTGCCTTTGATACTGGACGCCTCGAGTCCGG  
GAGAGGTGAATGGAAGTGCAGAGTGTAGAGGTGAAATTCGTAGATATTGCAAGAACACCA  
GTGGCGAAGGCGGCTCACTGGCCCGGAACCTGACGCTGAGACGCGAAAGCGTGGGGAGCAA  
ACAGGATTAGATAACCCAGTAGTCC

>Otu5727

CCAGCCTATGGGGCGCTGCAGTGGGGAATCTTGCGCAATGGGCGAAAGCCTGACGCAGCA  
ACGCCGCGTGAGGGATGAAGGTCTTCGGGTGTAAACCTCTTTCAGCAGGGACGATAAT  
GACGGTACCTGCAGAAGAAGCTCCGGCCAACTACGTGCCAGCAGCCGCGGTAATACGTAG  
GGAGCGAGCGTTGTCCGATTTCATTGGGCGTAAAGAGCTCGTAGGCGACTTGGTAAGTCG  
GGTGTGAAACCTCCAGGCTCAACCTGGAGATGCCACTCGATACTGCCATAGCTAGAGTCC  
GGTAGGGGCCCCACGGAATTCCTGGTGTAGCGGTGAAATGCGCAGATATCAGGAGGAACAC  
CGGTGGCGAAGGCGGTGGGCTGGGCCGGCACTGACGCTGAGGAGCGAAAGCTAGGGGAGC  
AAACAGGATTAGATAACCCCGTAGTCC

>Otu5728

CCAGCCTACGGGGGGCAGCAGTGAGGAATATTGGTCAATGGGTGCAAGCCTGAACCAGCC  
ATCCCGCGTGAAGGACGACTGCCCTATGGGTGTAAACTTCTTTTGTATAGGAATAAAC  
TACCCTCGTGAGGGTAGCTGAAGGTACTATACGAATAAGCACCGGCTAACTCCGTGCCAG  
CAGCCGCGGTAATACGGAGGGTGCAAGCGTTATCCGGATTTATTGGGTTTAAAGGGTCCG  
TAGGCGGACTTATAAGTCAGTGGTGAAAGCCTGTCGCTTAACGATAGAACTGCCATTGAT  
ACTGTAAGTCTTGAGTATATTGAGGTAGCTGGAATAAGTAGTGTAGCGGTGAAATGCAT  
AGATATTACTTAGAACACCAATTGCGAAGGCAGGTTACCAAGATATAACTGACGCTGGGG  
GACGAAAGCGTGGGGAGCGAACAGGATTAGAGACCCCAGTAGTCC

>Otu5741

CCAGCCTACGGGGTGCAACCAGTGGGGAATATTGGACAATGGGCGCAAGCCTGATCCAGCC  
ATGCCCGCTGGATGATGAAGGCCTTAGGGTTGTAAATCCTTTCGGCGGGGAAGATAATG  
ACGGTACCCGCGAGAAGAAGCCCCGGCTAACTTCGTGCCAGCAGCCGCGGTAATACGAAGG  
GGGCTAGCGTTGTTTCGAATTACTGGGCGTAAAGCGCGCGCAGGCGGCTTTTCAAGTCAG  
GGGTGAAAGCCCAGAGCTCAACTCTGGAAGTGCCTTTGAAACTGTGAGGCTTGAGTACGG  
GAGAGGTAAGTGGAATTCCCACTGTAGAGGTGAAATTCGTAGATATTGGGAAGAACACCG  
GTGGCGAAGGCGGCTCACTGGCCCGTTTCTGACGCTCATGCGCGACAGCGTGGGGATCAA  
ACAGGATTAGATACCCTAGTAGTCC

>Otu5744

CCAGCCTACGGGGTGCTCCAGTGGGGAATATTGGACAATGGGGGCAACCCTGATCCAGCA  
ATGCCACGTGTGTGAAGAAGGCCTGAGGGTTGTAAAGCACTTTAGCTGGGGAAGAAGGAA  
TGCGTGCTAATACCACGTGTTATTGACATTACCCAAAGAATAAGCACCGGCTAACTCTGT  
GCCAGCAGCCGCGGTAATACAGAGGGTGCAAGCGTTAATCGGAATTACTGGGCGTAAAGG  
GCTCGTAGGTTGTTAAATAAGTCAGATGTGAAATCCCTGGGCTCAACCTAGGAATTGCAT  
ATGATACTGTTTAGCTAGAGTATAGTAGAGGGAAGTGGAATTTCTGGTGTAGCGGTGAAA  
TGCGTAGATATCAGAAGGAACATCAGTGGCGAAGGCGACTTCCTGGACTAATACTGACAC  
TGAGGAGCGAAAAGCGTGGGGATCAAACAGGATTAGAAAACCCTAGTAGTCC

>Otu5746

CCAGCCTATGGGTGCAACCAGTAGGGAATCTTGCGCAATGGGCGAAAGCCTGACGATGCG  
ACGCCGTGTGAGTGAAGAAGGCCTTAGGGTCGTAAAGCTCTTTCGCTTGGGAACAAGAAA  
AGCTGGCTAACATCCAGCAGATTTGAGCGTACCAGGTAAAGAAGCACCGGCTAACTCCGT  
GCCAGCAGCTGCGGTAATACGGAGGGTGCAAGTATTAATCGGATTTATTGGGCGTAAAGG  
GCGCGTAGGCGGGCATGAAAGTCAGATGTGAAATCCCGGGGCTCAACCTCGGAACAGCAT  
TTGAAACTCCATGTCTAGAGGGTAGGAGGAGAAAACGGAATTCACAAGTAGCGGTGAAA  
TGCGTAGATATGTGGAAGAACACCGGTGGCGAAGGCGGTTTTCTATCTTATTCTTGACGC  
TGAGGCGCGAAAAGCAAGGGGATCAAACAGGATTAGATAACCCTGTAGTCC

>Otu5752

CCAGCCTACGGGGGGCACCAGACGTGCGCTGCAACGCCGTATTTTTCCGCCAGAATACCC  
TGCGCGCGCAACGCTTCGTTTCAAGTGGGACCACTGCCGAAAAGCTGTACTCTTCCCCGA  
CCTTCGGCGGGCGGCTTATACCGGTAGATACCTCTCAGAATGCCTTCCTGGGCGCCCTCC  
GGCATCGGGGGCATTTGGATAGTTCTCGTTATACAGTGTGAGGTAGTAGAACAGATCTTCC  
TGCTCCTGATACATGCGGCGAATGCCATCCTGCACGATAACGGCGATTTTCATACGCATAC  
GCCGGATCGTAAGCGGCGCAGGTGGGCACGGTGCTGGCAAGCACGATGCTGTGGCCATCC  
TGGTGTTGCAATCCCTCGCCCGATAGCGTGGTGCGTCCGGCTGTGCCGCCCATTAGAGAC  
CCTTGTAGTCC

>Otu5754

CCAGCCTATGGGGTGCTGCAAGTCAAGAACATTGCAACAATGGGCGAAAGCCTGATCGAGCG  
ACACCGCGTGCAAGGATGAAGGCCTTCGGGTCGTAAACTGCGGTAATATAGTAACAATGCA  
AATGAGTGCTATATGGAAAGAGGTGGGTAACCTACGTGCCAGCACCGGTAATGCGTAG  
ACCTCAAGCGTTATCCGGATTTATTGGGCGTAAAGCGCGTGTAGGTGGTTTCGTGCGTCT  
TCTGTTAAAGCCCACTGCCTAACGGTGGAAGTGCAGGAGATACGGCGAGACTAGAGGAGG  
TTAGAGGTGCATAGAACGCACGGTGTAGGGGTGAAATCCGTTGATATCGTGCGGAATACC  
AAAGGCGAAGGCATTGCACTGGGACCTTCCTGACATTGAGACGCGAAAGCGTGGGGAGCA  
AAAAGGATTAGAAACCCGTGTAGTCC

>Otu5762

CCAGCCTATGGGAGGCACCAGTCGAGAATCTTTCGCAATGGGCGAAAGCCTGACGAAGCG  
ACGCCGTGTGAGCGATGAAGGCCTTATGGTTCGTAAAGCTCTTTCGCCTGTGAACAAGTGA  
GTCTGACGAACAATCAGATAAATTGAGGGTAACAGGTAAAGAAGCACCGGCTAACTCCGT  
GCCAGCAGCTGCGGTAATACGGAGGATGCAAGCATTAATCGGATTTATTGGGCGTAAAGG

GCGCGTAGGCCGGTCTTTAAGTCAGATGTGAAATCCCGAGGCTCAACCTCGGAACAGCAT  
TTGAAACTGAAGACCTAGAGGGTAGAAGGAGAGAATGGAATTCACAAAGTAGCGGTGAAA  
TGCGTAGATATGTGGAAGAACACCGGTGGCGAAGGCGATTCTCTATTTTATTCCTGACGC  
TGAGGCGCGAAAGTAAGGGGATCAAACAGGATTAGAAACCCCTCGTAGTCC

>Otu5763

CCAGCCTATGGGGGGCAGCAGTGGGGAATATTGGACAATGGGCGCAAGCCTGATCCAGCC  
ATGCCGCGTGGAGGACGAAGGCCCTCTGGGTTGTAAACTCCTTTTATGGGGGACGAAAAA  
GGGATTTTCTAATCCAACCTGACGGTACCCCATGAATAAGCACCGGCTAACTCCGTGCCAG  
CAGCCGCGGTAATACGGAGGGTGCAAGCGTTATCCGGATTCACCTGGGTTTAAAGGGTGCG  
TAGGCGGGCAGTTAAGTCAGTGGTGAATCTTGGGGCTCAACCCCGAAACTGCCATTGAT  
ACTATCTGCCTTGAATACCGTGGAGGTGACGCGGAATATGTCATGTAGCGGTGAAATGCTT  
AGATATGACATAGAACACCGATTGCGAAGGCAGCTGGCTACACGGATATTGACGCTGAGG  
CACGAAAGCGTGGGGATCAAACAGGATTAGAAACCCCTTGTAGTCC

>Otu5766

CCAGCCTATGGGAGGCTCCAGTCGAGAATCTTTCGCAATGGGCGAAAGCCTGACGAAGCG  
ACGCCGTGTGTGCGATGAAGGCCTTCGGGTTGTAAAGCACTTTCGCTTGGGAACAAGAGA  
GATTGGCTAATATCCATTCAATTTGAGCGTACTAGGTAAAGAAGCACCGGCTAACTACGT  
GCCAGCAGCTGCGGTAATACGTAGGGTGCAAGCATTAAATCGGATTTATTGGGCGTAAAGG  
GCGCGTAGGCGGGATGGTAAGTCAGATGTTAAAGCCCGGGGCTCAACCCCGGAAAAGCAT  
TTGAAACTCCCATTTCTAGAGGGTAGGCGGAGAAAATGGAATTCCACAAGTAGCGGTGAAA  
TGCGTAGATATGTGGAAGAACACCAAGTGGCGAAGGCGGTTTTCTAGCTTATACCTGACGC  
TGAGGCGCGAAAGCAAGGGGATCAAACAGGATTAGAAACCCCTAGTAGTCC

>Otu5767

CCAGCCTACGGGTTGCACCAGTGGGGAATCTTGCGCAATGGGCGAAAGCCTGACGCAGCA  
ACGCCGCGTGAGGGACGAAGGCTTTCTGAGTTGTAAACCTCTTTCGACAGGAACGATTGT  
GACGGTACCTGTAGAAGAAGCACCGGCCAACTATGTGCCAGCAGCCGCGGTGATACATAG  
GGTGCAAGCGTTATTCGGATTTATTGGGCGTAAAGAGCTCGTAGGCGGTTTACGCAAGTCG  
GGTGTTAAACCCCGAGGCTCAACCTGGGGCCGCCACCCGAAACTGTTGTGACTAGAGTTT  
GGTAGGGGATCACGGAATTCCTGGTGTAGCGGTGGAATGCGCAGATATCAGGAGGAACAC  
CTGCGGTGTAGACGGCTTTCTGGACCATTGCTGACGCTGAGACACGAAAGCGTGGGTAGC  
AAACAGGATTAGAAACCCCGTAGTCC

>Otu5769

CCAGCCTACGGGGGGCAGCAGTGAGGAATATTGGACAATGTGCGAAAGCATGATCCAGTA  
ATGTCACCTTTAGGGACGAAATCGTTTAGATGTAAACCTATGAAGTTGGTGAAGATAATGA  
CATTAGCCAATGAATAGTCCTGGCTAACTTCGTGCCAGCAGCTGCGGTAAAACGGGGGGG  
GCGAGTGTTACTCATATTGATTGGGCGTAAAGGGTGCGTAGATGGTTTTATTAAATTAAG  
AAGTAAATATTAATGAAACGTGTTATAATAGTTTCTTAATACTATAAGACTTGAGTGCAT  
CAGGGGAAAATGGTACTTTTGGTGAAGGGGTGAAATCCGTAGATATCTTAAGGACGACCG  
AAGGCGAAAGCAATTTTCTAGGATGTGACTGACATTGAGGCACGAAAGCATGGGTAGCAA  
ACAGGATTAGAGACCCTAGTAGTCC

>Otu5779

CCAGCCTATGGGGGGCAGCAGTCGAGAATCATTCGCAATGGGCGAAAGCCTGACGATGCG  
ACGCCGTGTGTGTGATGAAGGCCTTCGGGTTGTAAAGCACTTTCGCCTGTGAACAAGAGA  
AGCTAGCTAATATCTAGCGAATTTGAGGGTAGCAGGTAAAGAAGCACCGGCTAACTCCGT  
GTCAGCAGCTGCGGTAATACGGAGGGTGCAAGCATTAAATCGGATTTATTGGGCGTAAAGG  
GCGCGTAGGCGGAAAGAAAAGTCAGATGTGAAAGACCGAGGCTTAACCTCGGAGCCGCAT  
TTGAAACTCTCTTTCTAGAGGGTAGATGGAGAAAACGGAATTCACGTGTAGCGGTGAAA  
TGCGTAGATATGTGGAAGAACACCTGTGGCGAAGGCGGTTTTCTAATTTATTCCTGACGC  
TGAGGCGCGAAAGTAAGGGGATCAAACAGGATTAGAAACCCCGTAGTCC

>Otu5784

CCAGCCTACGGGATGCTGCAGTGGGGAATATTGGACAATGGGCGAAAGCCTGATCCAGCA  
ATGCCGCGTGTGTGAAGAAGGTCTTCGGATTGTAAAGCACTTTTGGCAGGGACGATGATG  
ACGGTACCTGCAGAATAAGCCCCGGCTAACTTCGTGCCAGCAGCCGCGGTAATACGAAGG  
GGGCTAGCGTTGCTCGGAATGACTGGGCGTAAAGGGCGCGTAGGCGGCATACACAGTCAG  
AAGTGAAATTCCTGGGCTCAACCTGGGGACTGCTTTTGATACGTGTGAGCTAGAGTGAGG  
AAGAGGGTTGTGGAATTTCCAGTGTAGAGGTGAAATTCGTAGATATTGGGAAGAACACCG  
GTGGCGAAGGCGGCTCACTGGCTCGTAACTGACGCTCAGGCGCGACAGCGTGGGGATCAA  
ACAGGATTAGAAACCCCTAGTAGTCC



>Otu5793

CCAGCCTATGGGTCGCACCAGTGGGGAATCTTTCACAATGGGGGAAACCCTGATGGAGCG  
ACGCCGCGTGAGGATGAAGGTTTTTCGGATTGTAACTCCTGTCACTGCAGAACAAGGGT  
GCGTTTGTGAATAGCAGACGCATTTGATGGTATGCGGAGAGGAAGGGACGGCTAACTCTG  
TGCCAGCAGCCGCGGTAAGACAGGGGTCCCGAGCGTTGTTTCGGATTCATTGGGCGTAAAG  
GGTGTGTAGGAGGTCGGGTAAGTCAGGTGTGAAATCTCAGAGCTTAACTCTGAACTGCG  
CTTGATACTGCCCGGCTAGAGGATCGGAGGGGGTATCGGAATTTATGGTGTAGCAGTGAA  
ATGCGTAGATATCGTAAGGAAGACCAGTGGCGAAGGCGAATCTCTGGACAGTTACTGACG  
CTGAGGCACGAAGGCCAGGGGAGCAAACGGGATTAGATACCCTAGTAGTCC

>Otu5796

CCAGCCTATGGGGCGCAGCAGTAAGGAATATTGGACAATGGTGGCAACACTGATCCAGCC  
ATGCCGCGTGAGGATGAAGGCGCTACGCGTTGTAACTGCTTTTGTACCAGAGAAAACC  
TATCTACGTGTAGATAGCTGATAGTATGGTAAGAATAAGCATCGGCTAACTTCGTGCCAG  
CAGCCGCGGTAATACGAAGGATGCAAGCGTTATCCGGATTTATTGGGTTTAAAGGGTGCG  
TAGGCGGATCAATAAGTCAGTGGTGAACCTTCAGCTTAACTGGAGACTTGCCATTGAT  
ACTGTTAGTCTTGAGTACAGTCAAGGTAGGCGGAATGTGTAATGTAGCGGTGAAATGCTT  
AGATATTACACAGAACACCGATTGCGAAGGCAGCTGACGAACTGTAAGTACGCTGAGG  
CACGAAAGCGTGGGGATCAAACAGGATTAGAAACCCTAGTAGTCC

>Otu5798

CCAGCCTATGGGATGCTGCAGTCGAGAATTTTTTCACAATGGGCGCAAGCCTGATGGAGCG  
ACGCCGCGTGCGGGGATGAGTGGCTTCGGCCCGTAAACCCCTGTCATTTGCGATCAAACCT  
CGTTATTTAAAGATGACGAGCTGATAGTAGCGAAAGAGGAAGGGACGGCTAACTCTGTG  
CCAGCAGCCGCGGTAATACAGAGGTCCCAAGCGTTGTTTCGGATTCCTGCGGTAAAGGG  
TGCGTAGGCGGTTGGGTAAGTTTGACGTGAAATCTCCGGGCCTAACCCGGAACCTGCGTT  
GAATACTATCTGACTAGAGGAATGGAGGGGAGACTGGAATACTTGGTGTAGCAGTGAAAT  
GCGTAGATATCAAGTGGAACACCGAGTGGCGAAGGCGAGTCTCTGGACATTTCTTGACGCT  
GAGGCACGAAAGCCAGGGGAGCAAACGGGATTAGATACCCGTGTAGTCC

>Otu5804

CCAGCCTATGGGACGCAGCAGTGAAGGAATATTGGTCAATGGGGGCAACCCTGAACCGGCC  
ATGCCGCGTGAGGATGAATGCCCTATGGGTTGTAACTTCTTTTGTAGGGACGAACCT  
ATTATACGTGTATAGTACTGACGGTACCTAATGAATAAGCAACGGCTAACTCCGTGCCAG  
CAGCCGCGGTAATACGGAGGTTGCAAGCGTTATCCGGATTTATTGGGTTTAAAGGGTGCG  
TAGGCGGGATAATAAGTCAGTGGTGAACCTGCAGCTCAACTGTAGAACTGCCATTGAT  
ACTGTTATTCTTGAGTTTGGTTGAGGTGGGCGGAATGTGTAGTGTAGCGGTGAAATGCTT  
AGATATTACACAGAACACCGATTGCGTAGGCAGCTCACTAAACCAAACTGACGCTGAGG  
CACGAAAGCGTGGGGATCAAACAGGATTAGAAACCCAGTAGTCC

>Otu5806

CCAGCCTACGGGGGGCTGCAGTCGAGAATATTCCTCAATGGACGAAAGTCTGAAGGAGCG  
ACGCCGCGTGAGGATGAAGGGCTTCGGCTCGTAACTGCTTTTATTGGGAAGAACTAA  
TGACGGTACCAAATGAATAAGAGGTTGCTAACTCTGTGCCAGCAGCAGCGGTAATACAGA  
GACCTCAAGCATTATCCGGATTTATTGGGCGTAAAGGGTCCGCAGGCGGTTACGCGCGTC  
GATGGTTAAATCCTCGGGCTCAACTCGGGGACTGCTGTGCGAAACGGCGCAACTAGAGGCC  
GGGAGAGGTGAGCGGAATTGCCGGTGTAGTAGTAATATGCGTTGATATCGGCAAGAACAC  
CAAATGCGAAGGCAGCTCACTAGAACGGTTCTGACGCTCAGGGACGAAAGCGTGGGGAGC  
GAAAGGGATTAGATACCCTTGTAGTCC

>Otu5812

CCAGCCTACGGGGGGCAGCAGTGAAGGAATTTTTCGCAATGGCCGCAAGGCTGACGCAGCA  
ACGCCGCGTGAGTGAAGAAGGCCTTCGGGTCGTAAAGCCCTGTCAGGTGGGAAGAATGGC  
CTGGGGATGAATAAGCCCCGGGAGTGACGGTACCACCAGAGGAAGCACCGGCTAACTCCG  
TGCCAGCAGCCGCGGTAATACGGAGGGTGCAAGCGTTATTCGGAATTACTGGGCGTAAAG  
CGCGTGACGGCGGGCTAGCAAGTCTGATGTGAAAGCCCTGGGCTTAACCCGGAAGTGCA  
TTGGAACTGCTAGTCTTGAGTGTGGAGAGGAAGGGGAATTCCCGGTGTAGAGGTGAA  
ATTCGTAGAGATCGGGAGGAATACCGGTGGCGAAGGCGGCTACCTGGACCGATATTGACG  
CTGAGACGCGAAAGCGTGGGGAGCAAACAGGATTAGAAACCCGTGTAGTCC

>Otu5813

CCAGCCTATGGGTTGCTCCAGTGGGGAATTTTTCGCAATGGGGGAAACCCTGACGCAGCA  
ACGCCGCGTGAGTGATGAAGGCCTTCGGGTCGTAAAGCTCTGTCAAGAGGAAAGAAGTGT  
AGGAGGGATAATACCCCTTTTACTTGACGGTACCCTCAAAGGAAGCACCGGCTAACTCTG

TGCCAGCAGCCGCGGTAATACAGAGGGGGCAAGCGTTGTTTCGGAATTATTGGGCGTAAAG  
GGTGCGTAGGCGGTGCGGTAAGTCTTTTGTGAAATCTCCGGGCTCAACTCGGAGTCTGCA  
GGAGAAACTGCCGTGCTTGAGTATGGGAGAGGTGAGTGGAATTCCTGGTGTAGCGGTGAA  
ATGCGTAGATATCAGGAGGAACACCTGTGGCGAAAGCGGCTCACTGGACCATAACTGACG  
CTGAGGCACGAAAGCTAGGGGAGCAAACAGGATTAGATAACCCGGGTAGTCC

>Otu5821

CCAGCCTATGGGTGGCAGCAGTGAGGAATCTTTCGCAATGGGGGCAACCCTGACGCAGCA  
ACGCCGCGTGAGTGAGGAAGGTCTTCGGATCGTAAAGCTCTGTCGGGTGGGAAGAAATGT  
ATGGAGGTGAATAATCTTCATGCTTGACGGTACCACCAAAGGAAGCACCGGCTAACTCCG  
TGCCAGCAGCCGCGGTAATACGGGGGGTGCAAGCGTTGTTTCGGAATCATTGGGCGTAAAG  
GGCGTGTAGGCGGTGGATAAGTCAGATGTGAAAGCCCTGGGCTTAACCCAGGAAGTGCA  
TTTGAAGTGTCCGGCTTGAGTAGGGGAGAGGAAGGTGGAATTCCTGGTGTAGAGGTGAA  
ATTCGTAGATATCAGGAGGAACACCGGTGGCGAAGGCGACCTTCTGGCCCTATACTGACG  
CTGAGACGCGAAAGCGTGGGTAGCAAACAGGATTAGAGACCCTAGTAGTCC

>Otu5824

CCAGCCTACGGGGGGCAGCAGTTAGGAATCTTCTGCAATGCGCGCAAGCGTGACAGAGCG  
AGCCAGAGTGTTTTTCATATGAAAACTTTTGCCAGATGCAAAAAGTCTGGCGAATAAGG  
ACTGGGAGAGACGGGTGCCAGCCGCCGCGGTAATACCCGCGGTCCAAGTCGCAGCCATCT  
TTATTGGGTCTAAAACATCCGTAGCTTGCTTCGTAAGTCTCCTGTGAAATTCCTATGTCTC  
AAACATAGAGCGTGCAGGAGGTACTGCAAAGCTAGAGACTGGGAGACGTGAGAAGTATGT  
TCAAAGTAGTAGTGAAATATTTTAATCTTGGACAGACTCACAATAGCGAAGGCATCTCAC  
GAGAACAGTTCTGACAGTAAGGGATGAAGGCTAGGGTCGCGAAAGGGATTAGAGACCCCT  
GTAGTCC

>Otu5834

CCAGCCTACGGGGTGCTGCAGTGGGGAATCTTTCGCAATGGACGAAAGTCTGACGCAGCA  
ACGCCGCGTGGGTGATGAAGGTCTTCGGATCGTAAAGCCCTGTTCGGAGGGGAAGATGCTT  
TGCTTGGCTAATATCCAAGTGAGGTGACGGTACCTTTAAAGGAAGCACCGGCTAACTCTG  
TGCCAGCAGCCGCGGTAATACAGAGGGTGCAAGCGTTGTTTCGGAATTATTGGGCGTAAAG  
GGAGTGTAGGCGGTTTTTGATAGTCTTCTGTGAAATCTGCGGGCTCAGCCTGCAAAGTGCA  
GAGGATACTGCAAGACTTGAGTGTTCGGAGAGGATAGTGGAATTCCTGGTGTAGAGGTGAA  
ATTCGTAGAGATCGGGAGGAACACCAGTGGCGAAGGCGACTGTCTGGCTGACAACTGACG  
CTGAGACTCGAAAGCATGGGGAGCAAACAGGATTAGAGACCCTTGTAGTCC

>Otu5840

CCAGCCTACGGGGGGCTGCAGGGAATATTGCGCAATGGAGGAAACTCTGACGCAGCGACG  
CCGCGTGGGTGACGAAGGCCTTCGGGTTCGTAAAGCCCTGTTCGGAAGGGACGAAAGACGTT  
ATGGCTAACATCCATGACGAGTGACGGTACCTTCAGAGGAAGCACCGGCTAACTACGTGC  
CAGCAGCCGCGGTAATACGTAGGGTGCTAGCGTTGTTTCGGAATCATTGGGCGTAAAGCGC  
GTGTAGGCGGTCAAATAAGTCGGGTGTGAAATCCCTGGGCTCAACCGAGGAAGTGATCC  
GAAACTATTTGGCTGGAAGATGGTAGAGGAAGGTGGAATTCCTAGTGTAGAGGTGAAATT  
CGTAGATATTAGGAGGAATACCGGCGGCGAAGGCGGCCTTCTGGGCCATTCTTGACGCTG  
AGACGCGAAAGCGTGGGGAGCAAACAGGATTAGATAACCCAGTAGTCC

>Otu5843

CCAGCCTACGGGTTGCAGCAGTGGGGAATATTGGGCAATGGGCGAAAGCCTGACCCAGCG  
ACGCCATGTGGGTGATGAAGGCCTTCGGGTGTAAAGCCCTGTTAGGTGGGAAGAAGGAT  
CCAGAGGTAAATAATCTTTGGCTCTTGACGGTACCACCAGAGAAAGCACCGGCTAACTCC  
GTGCCAGCAGCCGCGGTAATACGGAGGGTGCAAGCGTTGTTTCGGAATTACTGGGCGTAAA  
GGGCGCGTAGGTGGTTGCGTAAGTCGGATGTGAAATCCCCGGGCTTAACCCGGGAAGTGC  
ACCCGATACTGCGTGACTCGAGTGCAGCAGAGGGAAACGGAATTCCTGGTGTAGAGGTGA  
AATTCGTAGATATCAGGAGGAACACCGGCGGCGAAGGCGGTTTCTGGGCTGACACTGAC  
ACTGAGGCGCGAAAGCGTGGGTAGCAAACAGGATTAGAAACCCCTGTAGTCC

>Otu5849

CCAGCCTATGGGGTGACAGCAGTGGGGAATATTGCACAATGGGCGAAAGCCTGATGCAGCG  
ACGCCGCGTGAGGGATGACGGCCTTCGGGTGTAAACCTCTTTCAGCAGGGAAGAAGCGT  
GAGTGACGGTACCTGCAGAAGAAGCACCGGCTAACTACGTGCCAGCAGCCGCGGTAATAC  
GTAGGGTGCGAGCGTTGTCCGGATTTATTGGGCGTAAAGAGCTCGTAGGCGGCTTGTTCGC  
GTCGGATGTGAAAGCCCGGGGCTCAACCCCGGGTTTGCATTTCGATACGGGCAGGCTAGAG  
TGTGGTAGGGGAGATCGGAATTCCTGGTGTAGCGGTGAAATGCGCAGATATCAGGAGGAA  
CACCGGTGGCGAAGGCGGATCTCTGGGCCATTACTGACGCTGAGGAGCGAAAGCGTGGGG

AGCGAACAGGATTAGAGACCCCCGTAGTCC

>Otu5851

CCAGCTATGGGGTGTCTGCAGTGGGGAATATTGGACAATGGGCGCAAGCCTGATCCAGCGA  
TGCCGCGTGTGTGAAGAAGGTCTTAGGATTGTAAAGCACTTTCGGCGGGGATGATGATGA  
CGGTACCCGCGAGAAGAAGCCCCGGCTAACTTCGTGCCAGCAGCCGCGGTAATACGAAGGG  
GGCTAGCGTTGCTCGGAATGACTGGGCGTAAAGGGCGCGTAGGCGGTTTGGACAGTCAGG  
TGTGAAATTCTTGGGCTTAACCTGGGGGCTGCATTTGATACGTCCAGGCTTGAGTGAGGA  
AGAGGGTTCGTGGAATTCCCAGTGTAGAGGTGAAATTCGTAGATATTGGGAAGAACACCGG  
TGCGCAAGGCGGCGACCTGGTCCTTAACTGACGCTGAGGCGCGAAAGCGTGGGGAGCAAA  
CAGGATTAGATAACCCGCGTAGTCC

>Otu5858

CCAGCCTACGGGGGGCTCCAGTCGAGAATCTTTCGCAATGGGCGAAAGCCTGACGAAGCG  
ACGCCGTGTGAGCGAAGAAGGCCTTCAGGTTGTAAAGCTCTTTCGCTTGGAACAAGAAA  
GGGATACTAATACTGTCCTGATTTGAGGGTACTAGGTAAAGAAGCACCGGCTAACTCCGT  
GCCAGCAGCTGCGGTAATACGGAGGGTGCAAGCATTGATCGGAATTACTGGGCGTAAAGG  
GCGCGTAGGCGGACAGGAAAGTCAAATGTGAAATTCCGCGGCTCAACCGCGGAGCTGCAT  
TTGAAACTTCTGCTGAGCATAGTTAGGGAAAACCGAATTCACGTGTAGCGGTGAAA  
TGCGTAGATATGTGAAGAACACCGGTGGTGAAGACGGTTTTCTGGGCTATTGCTGACGC  
TGAGGCGCGAAAGCTAGGGGAGCAAACAGGATTAGAAACCCAGTAGTCC

>Otu5865

CCAGCCTACGGGTTCGCAGCAGTGAGGAATATTGGTCAATGGGCGAGAGCCTGAACCAGCC  
ATCCCGCGTGCAGGAAGACGGCCCTATGGGTTGTAACTGCTTTTTTATGGGAAGAAAAA  
GACCTACGTGTAGGTCACTGACGGTACCATATGAATAAGCATCGGCTAACTCCGTGCCAG  
CAGCCGCGGTAATACGGAGGATGCGAGCGTTATCCGGATTTATTAGGTTTAAAGGGTGTG  
TAGGCGGATAATTAAGTCAGTGGTGAATCTCACAGCTTAACTGTGAACTGCCATTGAT  
ACTGGTAATCTTGAGTACGGTTGAAGTAGGCGGAATGTGTAATGTAGCGGTGAAATGCTT  
AGATATTACACAGAACACCGATTGCGAAGGCAGCTTACTAAGCTGTTACTGACGCTGATG  
CACGAAAGCGTGGGGAGCGAACAGGATTAGATAACCCGCGTAGTCC

>Otu5869

CCAGCCTATGGGACGCAGCAGTGAGGAATATTGGGCAATGCCTGCAAAGGTGACCCAGCA  
ACGCCGCGTGGAGGATGAAAACCGTAAGGTTGTAACTCCTGTGAGAGGGGACGAATGGC  
TAGTATCCGTAAGAATACTAGTATGACTGTACCCTCAGAGGAAGTCCCGGCTAACTACGT  
GCCAGCAGCCGCGGTAATACGTAGGGGGCAAGCGTTGTCCGGATTTACTGGGTGTAAAGG  
GCGCGTAGGCGGGTTTTGTTAGTCAGAGGTGAAATCCTACAGCTCAACTGTAGAACTGCCT  
TTGATACTGCAAATCTTGAGTTCAGAAGAGAGAAGCGGAATTCAGGTGTAGTGGTGAAA  
TACGTAGATATCTGGAAGAACACCAGTTGCGAAGGCGGCTTCTTGGTCTGTAACCTGACGC  
TCAGGCGCGAAAGCGTGGGTAGCAAACAGGATTAGATAACCCAGTAGTCA

>Otu5871

CCAGCCTATGGGGGGCAGCAGTCGAGAATCTTCCGCAATGGGGGAAACCCTGACGGAGCG  
ACGCCGCGTGGAGGATGACATACTTCGGTGTGTAACTCCTTTTGCCAGGGAAAAAGTTA  
TTGATTGTACCTGGAGAATAAGAAGTTGCTAACTCGTGCCAGCAGCAGCGGTAATACGA  
GTGCTTCGAGCGTTATCCGGAATTATTGGGCGTACAGGGTGTGTAGGCGGCAGTGTTAGT  
CTCTTGTAATAATCCTCGGCTCAACCGAGGGGCGCGCAAGAGAAACGGCACAGCTCGAGTA  
TGGAAGGGGTCTTCGGAACCTCATGGTGTAGCGGTGAAATGCGTTGATATCATGGGGAAAC  
CCAAAAGCGAAGGCAGAAGACTGGTCCATTACTGACGCTGAAACACGAAAGCGTGGGTCTG  
CGAATGGGATTAGAAACCCCCGTAGTCC

>Otu5874

CCAGCCTATGGGATGCTGCAGTAGGGAATATTCCACAATGGACGAAAGTCTGATGGAGCG  
ACGCCGCGTGAGGGATGAAGGCCTTCGGGTTGTAAACCTCTTTCGACAGGGACTAAATTC  
ACTGCAGTGAATAATTGCAGTGATTGACGGTACCTAGGGAAGAAGCTACGGCTAACTCTG  
TGCCAGCAGCCGCGGTAATACAGAGGTAGCAAGCGTTGTCCGGATTCACTGGGCGTAAAG  
GGCTTGAGGTGGCTTTTTAAGTCAGGTGTGAAATCGTCCCGCTTAACGGGACAATTGCA  
TTTGATACTGATAAGCTTGAGTGCGGGAAGGGAACTGGAATTTCCGGTGTAGCGGTGAA  
ATGCGTAGATATCGGAAAGAACACCAGTGGCGAAGGCGGGTTTTCTGGCCTGCAACTGACA  
CTGAGGAGCGAAAGCCAGGGGAGCAAACGGGATTAGATAACCTTGATAGTCC

>Otu5880

CCAGCCTATGGGGGGCTGCAGTCGAGAATCTTCGGCAATGGGCGCAAGCCTGACCGAGCG  
ACGCCGCGTGCGGGATGAAGGCCTTCGGGTTGTAAACCGCTGTCAGTGTGGAGGAAATTC

CGTAGAGTTCTCTCTATGGATTGACCTATACGCAGAGGAAGGATGGGCTAAGTTTCGTGCC  
AGCAGCCGCGGTAAGACGAACCATCCAAACGTTATTTCGGAATCACTGGGCTTAAAGGGTG  
CGTAGGCGGCGCGTTAAGTCGGGTGTGAAATACCTCAGCCTAACTGAGGAATTGCGCCCCG  
AAACTAGCGTGCTTGAGGAAGACATAGGTGAGCGGAACCTAGGGTGGAGCGGTGAAATGC  
GTTGATATCCTAAGGAACACCAGTAGCGAAAGCGGCTCACTGGGTCTTATCTGACGCTGA  
GGCACGAAAGCCAGGGGAGCGAACGGGATTAGATACCCTAGTAGTCC

>Otu5884

CCAGCCTACGGGGCGCTCCAGTCGAGAATCTTTTCGCAATGGGCGCAAGCCTGACGAAGCG  
ACGCCGTGTGAGCGAAGAAGGCCTTCGGGTGTAAAGCTCTTTCGCTAGGGAACAAGAGA  
GGCGTGGAATATAACGCCGATTTGATGGTACTTGGTAGAGAAGCACCGGCTAACTCCGT  
GCCAGCAGCTGCGGTAATACGGAGGGTGCAAGCATTGATCGGAATTACTGGGCGTAAAGG  
GCGCGTAGGCGGCTTTGAAAGTCAGATGTGAAATTCGGGGCTCAACCCCGGAGCTGCAT  
TTGAAACTTCAGAACTAGAGGTCAGTTAGGGAAAACGGAATTCACGTGTAGCGGTGAAA  
TGCGTAGATATGTGGAAGAACACCAGTGGTGAAGACGGTTTTCTGGGCTGATACTGACGC  
TGAGGCGCGAAAGCAAGGGGAGCAAACAGGATTAGAGACCCTAGTAGTCC

>Otu5891

CCAGCCTACGGGGCGCACCCAGTGGGGAATATTGGACAATGGGCGAAAGCCTGATCCAGCA  
ATGCCGCGTGTGTGAAGAAGGCCTGCGGGTTGTAAAGCACTTTCAGTGGGGAAGAAAAGC  
CCGGGACGAATAATCTCGGGTCTTGACGTTACCCACAGAAGAAGCACCGGCTAACTCCGT  
GCCAGCAGCCGCGGTAATACGGAGGGTGCGAGCGTTAATCGGAATTACTGGGCGTAAAGC  
GCGCGTAGGCGGTTCGGGTAAGTCGGATGTGAAAGCCCTGGGCTTAACCTGGGAATTGCAT  
TCGATACTGTCCGGCTAGAGTATGGGAGAGGGAAGTGAATTTCCGGTGTAGCGGTGAAA  
TGCGTAGATATCGGAAGGAACACCAATGGCGAAGGCAGCTTCCTGGCCCAATACTGACGC  
TCAGGCGCGAAAGCGTGGGGAGCAAACAGGATTAGATACCCGGGTAGTCC

>Otu5893

CCAGCCTATGGGAGGCACCAGTAAGGAATATTGGTCAATGGGCGAAAGCCTGAACCAGCC  
ATGCCGCGTGCAGGAAGACGGCCCTACGGGTGTAAACTGCTTTTGCAGGGGAATAAACC  
CCCGTACGTGTACGGGGCTGAATGTACTCTGAGAATAAGGATCGGCTAACTCCGTGCCAG  
CAGCCGCGGTAATACGGAGGGTGCAAGCGTTATCCGGATTCACTGGGTTTAAAGGGTGCG  
TAGGCGGGCAGGTAAGTCAGTGGTGAAATCTCCGGGCTTAACCCGGAAACTGCCGTTGAT  
ACTATCTGTCTTGAATGTTCGTGGAGGTGAGCGGAATATGTCATGTAGCGGTGAAATGCTT  
AGATATGACATAGAACACCAATTGCGAAGGCAGCTCACTACACGATGATTGACGCTGAGG  
CACGAAAGCGTGGGGATCAAACAGGATTAGAAACCCGCGTAGTCC

>Otu5895

CCAGCCTACGGGGGGCTCCAGTAGGGAATCTTGCGCAATGCGCGAAAGCGTGACGCAGCA  
ACGCCGCGTGGGGGAAGAAGGCCTTCGGGTGTAAACCCCTTTCAGTTGGGACGAAGCTT  
CGTCGGTTAATAGCCGACTGGAGTGACGGTACCTTCACAAGAAGCACCGGCTAACTACGT  
GCCAGCAGCCGCGGTAATACGTAGGGTGCAAGCGTTGTCCGGAATTATTGGGCGTAAAGA  
GCTCGTAGGCGGCTTAGCAAGTCGGGTGTGAAACCTCCAGGCTCAACCTGGAGCCGCCAC  
TCGATACTGCTATGGCTAGAGTCCGGTAGGGGACCACGGAATTCCTGGTGTAGCGGTGAA  
ATGCGCAGATATCAGGAGGAACACCAGTGGCGAAGGCGGTGGTCTGGGCCGGAAGTACG  
CTGAGGAGCGAAAGCGTGGGGAGCGAACAGGATTAGAAACCCTCGTAGTCC

>Otu5905

CCAGCCTATGGGGCGCTGCAGTGGGGAATCTTGCGCAATGGACGAAAGTCTGACGCAGCC  
ACGCCGCGTGAGTGAAGAAGGCCTTCGGGTGTAAAGCTCTGTGCAACGGGACGAAAACA  
CTTGGGGTGAATAGCCTCAGGAATTGACGGTACCGTGAGAGGAGGCACCGGCTAACTCCG  
TGCCAGCAGCCGCGGTAATACGGAGGGTGCAAGCGTTGCTCGGAATTATTGGGCGTAAAG  
GGCAGGTAGGTGGTCTCATTTGTCTGAGGTGAAAGCCTTGAGCTTAACTCAAGAAGTGCC  
TCAGAAACGGTGAGACTAGAGTCTTGAGAGGGTTCGCGGAATTCCTGGTGTAGCGGTGAA  
ATGCGTAGAGATCGGGAGGAACACCAGAGGCGAAAGCGGCGGCCTAGACAAGTACTGACA  
CTCAACTGCGAAAGCGTGGGGAGCAAACAGGATTAGAGACCCTTGTAGTCC

>Otu5911

CCAGCCTATGGGTCGCTGCAGTAGGGAATTTCCACAATGGGCGAAAGCCTGATGGAGCA  
ACGCCGCGTGAGGATGAAGGCCTTAGGGTTGTAAACTGCTTTTCTCTGTGACGATTATG  
ACGGTAACAGAGGAATAAGGACCTGCTAACTACGTGCCAGCAGCCGCGGTACATACGTAGG  
GTCCAAGCGTTATCCGAAATTACTGGGCGTAAAGAGTTGCGTAGGTGGCATAGTAAGCGG  
GTAGTGAAATCGCGTGGCTCAACCATACATCCATTACCTGAACTGCTAAGCTTGAGAACG  
AGAGAGGTAGATGGAATTCACAGTGTAGGAGTGAAATCCGTAGATATTGGGAGGAACACC

GATGGCGTAGGCAGTCTACTGGCTCGTTTCTGACACTAAGGCACGAAAGCGTGGGGAGCA  
AACGGGATTAGAAACCCAGTAGTCC

>Otu5928

CCAGCCTATGGGTGGCAGCAGTGGGGAATATTGCGCAATGGGGGAAACCCTGACGCAGCA  
ACGCCGCGTGAGTGATGAAGGTCCTCGGATCGTAAAGCTCTGTCCGCAGGGAAGATGGTT  
TGATTGGTTAATAACCAGTTAAGCTGACGGTACCTGCAAAGGAAGCACCGGCTAACTCTG  
TGCCAGCAGCCGCGGTAATACAGAGGGTGCAAGCGTTGTTCCGAATTATTGGGCGTAAAG  
GGCGCGTAGGCGGTCCCGAAAGTCGAATGTGAAAGCCAGGGCTCAACCTTGGAAGTGCA  
TCCGAACTGCGGGACTAGAATCTCGGAAAGGGTGGTGGAAATCCCAGTGTAGAGGTGAA  
ATTCGTAGATATTGGGAGGAACACCGGTGGCGAAGGCGACCACCTGGACGAAGATTGACG  
CTGAGGCGCGAAAGCGTGGGGAGCAAACAGGATTAGAAACCCCGTAGTCC

>Otu5936

CCAGCCTATGGGTCGCTGCAGTGAGGAACATTGGGCAATGGGCGAAAGCTTGACCTAGTA  
ATGGTTCAAGAGTGAGAAATAGACGGCATTATCGCTGTAAAGCTCTTTCAAAAATGACGA  
TAATGACTGTAATTAGAGAATAAGCACTGGCTAATTCTGTGCCAGCAGCCGCGGTAATAC  
AGGGAGTGCAGACGTTATTTCGGATGAATTTGGTGTAAAGTATATGTAGGCTGCTTTTTGA  
ACTTTTTTAAATCCTAGAATTAATCTTTTAGGAAAAATAAAGTAATCAAAAGCTAAGAG  
TTTAAGAAAGGTTGAAAGAATTTCTTGTCTAAGGGTTGAATCTATAAAAAATAAGGACGAC  
TACCAATTTAGTAGCGAAAGCATTCTTCTGGCTTAATAACTGACGCTGAGATATGAAAGT  
CTAGGGATCAAACAGGATTAGGGACCCCTCGTAGTCC

>Otu5948

CCAGCCTACGGGGGGCAGCAGTGGGGAATATTGGACAATGGGCGAAAGCCTGATCCAGCA  
ATGTCGCGTGAAATGATGAAGGCCTTAGGGTTGTAAAGTTCTTTCGGTGGGGAAGATAATG  
ACGGTACCCACATAAGAAGCTCCGGCTAACTCCGTGCCAGCAGCCGCGGTAATACGGAGG  
GAGCTAGCGTTGTTCCGAATTACTGGGCGTAATGAGCGCGTAGGCGGCTAACTAAGTTGG  
GAGTGAAATCCCAGGGCTTAACCCTGGAATGGCTTTCAAAACTGGTTAGCTAGAGGACGA  
TAGAGGATGGTGGAATTCCTAGTGTAGAGGTGAAATTCCTTAGATATTAGGAGGAACATCG  
GAGGCGAAGGCGACCATCTGGGTCTGATCTGACGCTGAGGCGCGAAAGCGTGGGGAGCAA  
ACAGGATTAGATACCCCGTAGTCC

>Otu5952

CAGCCTATGGGTGGCAGCAGTGAGGAATATTGGTCAATGGACGCAAGTCTGAACCAGCCA  
TGTCGCGTGACAGGAAGACGGCCTTATGGGTGTAAAGCTCTTTCTATAGGGAGAAACCC  
CCTTTCGTGAGAGGGGCTGACGGTACTATAGGAATAAACACCGGCTAACTCCGTGCCAGC  
AGCCGCGGTAATACGGAGGGTGTAAGCGTTATCCGGAATCATTGGGTTTAAAGGGTCCGT  
AGGCGGACTGATAAGTCAGAGGTGAAATCCCACAGCTTAAGTGTGGAAGTGCCTTTGATA  
CTGTCAGTCTTGAGTTATATTGAAGTAGATGGAATGTGTAGTGTAGCGGTGAAATGCATA  
GATATTACACAGAACACCGATTGCGAAGGCAGTCTACTAAGTATATACTGACGCTGAGGG  
ACGAAAGCGTGGGGATCAAACAGGATTAGAAACCCTTGTTAGTCC

>Otu5965

CAGCTACGGGGTGCTGCAGTGGGGAATATTGCGCAATGGACGAAAGTCTGACGCAGCAAC  
GCCGCGTGAGTGAAGAAGGCCTTCGGGTGTAAAGCTCTTTCGGCTGGGAAGAAGGGAGT  
AAGGGCTAACAGTCCTTGCTTTTGATGGTACCAGAAGAAGAAGCACCGGCAAACCTTCGTG  
CCAGCAGCCGCGGTAATACGAAGGGTGCGAGCGTTGTTCCGAATTATTGGGCGTAAAGGG  
TTCGTAGGCGGGATCGTAAGTCAAGTGTGAAATCCCCGAGCTTAAGTCCGGGACGTGCATT  
TGAAACTGTGATTCTTGAGTCATTGAGAGGGTGGTGGAAATGTTGGTGTAGGAGTGACAT  
CCGTAGAGATCAACAGGAACATCAGAGGCGAAAGCGGCCACCTGGCAATGTACTGACGCT  
GAGGAACGAAAGCGTGGGGAGCAAACAGGATTAGATACCCTCGTAGTCC

>Otu5967

CCAGCCTACGGGTGGCAGCAGTAGGGAATCTTGCGCAATGCGCGAAAGCGTGACGCAGCA  
ACGCCGCGTGGGGGAAGAAGGCTTTCGGGTGTAAACCCCTTTCAGTTGGGACGAAGCTC  
CGTCGGTTAATAGCCGGCTGGAGTGACGGTACCTTCACAAGAAGCACCGGCTAACTACGT  
GCCAGCAGCCGCGGTAATACGTAGGGTGCAAGCGTTATTCGGATTTATTGGGCGTAAAGA  
GCTCGTAGGCGGTTACAGCAAGTCGGGTGTAAACCCCGAGGCTCAACCTGGGGCCGCCAC  
CCGAAACTGTTGTGACTAGAGTTTGGTAGGGGATCACGGAATTCCTGGTGTAGCGGTGGA  
ATGCGCAGATATCAGGAGGAACACCAGTAGCGAAGGCGGTGATCTGGGCCGGTACTGACG  
CTGAGGAGCGAAAGCGTGGGGAGCGAACAGGATTAGAAACCCCGGTAGTCC

>Otu5968

CCAGCCTATGGGTCGCAGCAGTCGAGAATCATGCTCAATGCGCGAAAGCGTGAAGCTGTG

ATCCATCAGGAGTGAAGACGAGCAATCGTAAAGCTCATTAGAACGTTACATTTTGGAGTG  
ACGTTTGAAAAGTAGTAGTTAATACATGTGCCAGCAGCTGCGGTCATACATGAGCTGCGG  
GCATTAATTGGGAGGATTTCGGTGTAAAGGGTACGTAGGCGGTAGCGATGAATCCACACGA  
TGGACGAGATGCTCTCTCAGAGTTGTGTGGTGCCAGCTTCTTGAGATGGCTAGAGGAGAA  
CGAATGGTGAGGGGAGGAATGAAATCCTGAGATCTTCATTGGAACAACGAAGGCGAAGG  
CAGTTCTCTGGGGCTTATCTGACGCTGAGGTACGAAAGGATGGGGAGCAAACGAGATTAG  
AAACCCTAGTAGTCC

>Otu5970

CCAGCCTATGGGTCGCTGCAGTAAGGAATATTGGACAATGGGGGAAACCCTGATCCAGCA  
ATGCCGCGTGAATGAAGAAGGCCTTCGGGTGTAAAGTTCTTTCGCTCGCGAAGATAATG  
ACGGTAGCGAGATAAGAAGGTCCGGCTAACTCTGTGCCAGCAGCCGCGGTGAGACAGAGG  
GACCTAGCGTTGTTTCGGAATGACTGGGCGTAAAGGGTGCCTAGGTGGTTATTTAAGTAAA  
GTGTTAAAGCCCCAGGCTCAACCTGGGAATCGCATTTTATACTGGATAGCTAGAGTATGG  
CAGAGGAAAATGGAATTCCTAGTGTAGAGGTGGAATTCGTAGATATTAGGAGGAACACCA  
GAGGCGAAGGCGATTTTCTGGGCCATTACTGACACTGAGGCACGAAAGCGTGGGGAGCAA  
ACAGGATTAGAGACCCTAGTAGTCC

>Otu5973

CCAGCCTACGGGGGCGAGCAGTCGAGAATCATTCGCAATGGGCGAAAGCCTGACGATGCG  
ACGCCGTGTGAGCGATGAAGGCCTTCGGGTGTAAAGCTCTTTCGCTCGCGAAGAGA  
GATCGGCTAATATCCGGCCAATTTGAGGGTACCAGGTAAGGAAGCACCGGCTAACTCCGT  
GCCAGCAGCTGCGGTAATACGGAGGGTGCAAGCATTAAATCGGAATTATTGGGCGTAAAGG  
GCGCGTAGGCGGGGAGATAAGTCAGATGTGAAATCCCGGGGCTCAACCTCGGAACAGCAT  
TTGAAACTATCTTTCTTGAGGGTAGGAGGAGAAAACGGAATTCACAAGTAGCGGTGAAA  
TGCGTAGATATGTGGAAGAACACCGGTGGCGAAGGCGGTTTTCTATCTTATTCCTGACGC  
TGAGGCGCGAAAGCAAGGGGATCAAACAGGATTAGAAACCCGCGTAGTCC

>Otu5974

CAAGCCTATGGGTCGCACCAGTGGGGAATATTGGACAATGGGCGCAAGCCTGATCCAGCA  
ATGCCGCGTGAGTGAAGAAGGTCTTCGGATTGTAAAGCTCTTTCGACGGGGACGATGATG  
ACGGTACCCGTAGAAGAAGCCCCGGCTAACTTCGTGCCAGCAGCCGCGGTAATACGAAGG  
GGGCTAGCGTTGCTCGGAATGACTGGGCGTAAAGGGCGCGTAGGCGGCGATGATAGTCAG  
GCGTGAAATTCCTGGGCTCAACCTGGGGACTGCGTTTGATACGTTATTGCTTGAGTTCGG  
AAGAGGGTCGTGGAATTCACAGTGTAGAGGTGAAATTCGTAGATATTTCGAAGAACACCA  
GTGGCGAAGGCGGCTCACTGGCCCGGTACTGACGCTGAGGTGCGAAAGCGTGGGGAGCAA  
ACGGGATTAGATACCCTCGTAGTCC

>Otu5981

CCAGCCTACGGGTTGCAGCAGTGGGGAATATTGCGCAATGGGCGAAAGCCTGACGCAGCG  
ACGCCGCGTGAGGATGAAGGCCTTCGGGTGTAAACTTCTGTTAAGTGGGAAGAAATAA  
GCGCTTCTAATACAGGCGCAAGATGACGGTACCATTAGAGAAAGCACCGGCTAAACTCGT  
GCCAGCAGCCGCGGTAATACGAGTGGTGCAAGCGTTATTTCGGAATCATTTGGGCGTAAAGG  
GTGTGTAGACGGTGTGCTAAGTCAACTGTTTAATTCTCCGGCCTAACCGGAGGCCAGCGG  
TAGAACTAGCATGCTAGAGGGTGGAAAGAGAGAAGTGGAAATTCCTCGGAGTAGCGGTAAAA  
TGCGTAGATCTCGAGAGGAACACCAATGGCGAAGGCAGCTTCTTGGTCCATTTCCTGGCGT  
TGAAACACGAAAGCGTGGGGAGCAAACAGGATTAGAAACCCTGGTAGTCC

>Otu6020

CCAGCCTATGGGTGGCAGCAGTGGGGAATATTGGACAATGGGCGCAAGCCTGATCCAGCA  
ATGCCGCGTGAATGATGAAGGTCTTAGGGTTGTAAACTGCTTTTGCCGGGGGATAAAAGA  
CCCCTGCGGGGGAAATTGAAGGTACCTGGTGAATAAGCCACGGCTAACTACGTGCCAGCA  
GCCGCGGTAATACGTAGGTGGCAAGCGTTGTCCGGATTTATTGGGTTTAAAGGGTGCCTA  
GGCGGTTTCCTTAAGTCAGTGGTGAAATACAGCCGCTTAACGGTTGAGGTGCCAATGATAC  
TGGGGGACTTGAGTACAGACGAGGTAGGCGGAATTGACGGTGTAGCGGTGAAATGCATAG  
ATATCGTCAAGAACACCGATAGCGAAGGCAGCTTACTAGACTGTAACCTGACGCTGATGCA  
CGAAAGTGTGGGGATCAAACAGGATTAGAGACCCGTGTAGTCC

>Otu6024

CCAGCCTATGGGATGCACCAGTATACGGCGACTCAAGCCGCAAGTGCGCGCACACAGCGC  
CGGCCGGCGCGCAATCAGATAGGAGGCAGTAGCCGCTTCGGCGGACGCGATAGAGCAGG  
GTCAGGAAGGTGACCGAGCCGCGAGGTGATAAGGCTCGCGACCATGCCAAGGATCAGCGAG  
AGGTCGTGCTGATAGACCCGTGTACGATCGCGATCACCTGCAGCACGTTGAATCCCCCA  
AAGGTGATCAGGGAGATTCCCTCGTCTCTTCTTGCGCCAGAGCGCCAGCACCTGCGGG

ACGAACAGCAGCGCGTTGCACAGGAGCGCCAGGCCAAAGATCACAGCGACAATCTGCTTC  
ATGGGAACCTTCTCGTTGGAGGAGCTTCAAAAATTAGAGACCCTTGTAGTCC  
>Otu6029  
CCAGCCTATGGGGTGCACCAGTGGGGAATATTGGACAATGGGGGCAAGCCTGATCCAGCA  
ATGCCGCGTGTGTGAAGAAGGCCTGCGGGTTGTAAAGCACTTTCAGTGGGGAGGAAGGCC  
TTAGTGTTAATAGCACTGAGGATTGACGTTACCTACAGAAGAAGCACCGGCTAACTCTGT  
GCCAGCAGCCGCGGTAATACAGAGGGTGCAGCGTTAATCGGAATTACTGGGCGTAAAGG  
GCGCGTAGGTGGTTAATTAAGTCAGATGTGAAATCCCTGGGCTTAACCTAGGAATTGCAT  
ATGAACTGATTAGCTAGAGTGCAAGAGAGGGAAGTGGAATTTCCGGTGTAGCGGTGAAA  
TGCGTAGATATCGGAAGGAACACCAGTGGCGAAGGCGACTTCCTGGCTTGTTACTGACAC  
TGAGGCGCGAAAGCGTGGGGAGCGAACAGGATTAGAAACCCCGTAGTCC  
>Otu6040  
CCAGCCTATGGGGGGCTGCAGTGGGGAATATTGGACAATGGGCGCAAGCCTGATCCAGCC  
ATGCCGCGTGGGTGATGAAGGCCCTAGGGTTGTAAAGCCCTTTCGGCGGGGAAGATAATG  
ACGGTACCCGCGAGAAGAAGCCCCGGCTAACTTCGTGCCAGCAGCCGCGGTAATACGAAGG  
GGGCTAGCGTTGCTCGGAATGACTGGGCGTAAAGGGCGCGTAGGCGGCACATACAGTCAG  
AAGTGAAATTCCTGGGCTCAACCTGGGGACTGCTTTTGATACGTGTGAGCTAGAGTGGAG  
AAGAGGGTTGTGGAATTTCCAGTGTAGAGGTGAAATTCGTAGATATTGGGAAGAACACCG  
GTGGCGAAGGCGGCGACCTGGTCCTTAACCTGACGCTGAGGCGCGAAAGCGTGGGGAGCAG  
ACAGGATTAGATACCCGAGTAGTCC  
>Otu6044  
CAGCCTATGGGGGGCAGCAGTGAGGAATCTTGCGCAATGGGCGAAAGCCTGACGCAGCGA  
CGCCGCGTGAAGGATGAAGGTCTTCGGATTGTAAACTTCTGTAAAGCGGGAAGAAAGGTC  
TATTTCTAATACAGATAGATGATGACGGTACCGCTAGAGAAAGCACCGGCTAACTTCGTG  
CCAGCAGCCGCGGTAATACGAGGGGTGCAAGCGTTATTCGGATTTATTGGGCGTAAAGGG  
TGTGCAGACGGTATATTAAGTCACTTGTTAAATTCCTCGGCCTAACTGAAGGTATGCAGG  
TGATACTGGTAACTAGAGGGTGGAAGAGAGAAGTGGAATTCCTCGGAGTAGCGGTAAAT  
GCGTAGATCTCGAGAGGAACACCAATGGCGAAGGCAGCTTCTTGGTCCATTCTTGACGTT  
CATACACGAAAGCGTGGGGAGCAAACAGGATTAGATACCCTAGTAGTCC  
>Otu6048  
CCAGCCTACGGGAGGCAGCGGGGAATTTTGGACAATGGACGCAAGTCTGATCCAGCCATG  
CCGCGTGCGGGAAGAAGGCCTTCGGATTGTAAACCGCTTTTGTGAGGGAAGAAAAGTCTC  
GAGTTAATACCTTGGGATGATGACGGTACCTGAAGAATAAGCACCGGCTAACTACGTGCC  
AGCAGCCGCGGTAATACGTAGGGTGCAAGCGTTAATCGGAATTACTGGGCGTAAAGCGTG  
CGCAGGCGGTCCGCTAAGACAGATGTGAAATCCCCGGGCTTAACCTGGGAAGTGCATTTG  
TGA CTGGCGGGCTAGAGTATGGCAGAGGGGGGTAGAATTCGCGTGTAGCAGTGAAATGC  
GTAGAGATGTGGAGGAATACCGATGGCGAAGGCAGCCCCCTGGGCCAATACTGACGCTCA  
TGCACGAAAGCGTGGGGAGCAAACAGGATTAGATACCCTTGTAGTCC  
>Otu6053  
CCAGCCTATGGGGCGCAGCAGTAGGGAATCTTCCACAATGGGCGAAAGCCTGATGGAGCA  
ACGCCGCGTGCAGGATGAAGGCCTTCGGGTCGTAAACTGCTTTTATCTGTGACGATTATG  
ACGGTAGCAGATGAATAAGGATCGGCTAACTCCGTGCCAGCAGCCGCGGTCATACGGAGG  
ATCCAAGCGTTATCCGGAATTACTGGGCGTAAAGAGTTGCGTAGGTGGCAGAGTAAGTAG  
GGCATGAAATCGTGTGGCTCAACCATAACACATGTTCTAAACTGCTCAGCTTGAGGACG  
AGAGAGGTTATTGGAATTCCTAGTGTAGGAGTGAAATCCGTAGATATTAGGAGGAACACC  
GATGGCGTAAGCAGATAACTGGCTCGTTCCTGACACTAAGGCACGAAAGCGTGGGGAGCA  
AACGGGATTAGAAACCCTAGTAGTCC  
>Otu6055  
CCAGCCTATGGGGTGCACCAGTGGGGAATATTGGACAATGGGCGCAAGCCTGATCCAGCA  
ATGCCGCGTGGATGAAGAAGGTCTTCGGATTGTAAAGTCCTTTCGGCGGGGACGATGATG  
ACGGTACCCGCGAGAAGAAGCCCCGGCTAACTTCGTGCCAGCAGCCGCGGTAATACGAAGG  
GGGCTAGCGTTGCTCGGAATGACTGGGCGTAAAGGGCGCGTAGGCGGCTGATCTCGTCAG  
GCGTGAAATTCCTGGGCTCAACCTGGGGGCTGCGTTTGATACAGATTGGCTGGAGTGGGG  
AAGAGGGTCGTGGAATTCACAGTGTAGAGGTGAAATTCGTAGATATTGGGAAGAACACCG  
GTGGCGAAGGCGGCGACCTGGTCCTTGACTGACGCTGAGGCGCGAAAGCGTGGGGAGCAA  
ACAGGATTAGATACCCCTGTAGTCC  
>Otu6059  
CCAGCCTATGGGGTGCAGCAGTGGGGAATATTGCACAATGGGCGGAAGCCTGATGCAGCG

ACGCCGCGTGAGGGATGACGGCCTTCGGGTGTGAACCTCTTTTCGACAGGGACGAAGCGT  
GAGTGACGGTACCTGTAGAAGAAGCACCGGCCAACTACGTGCCAGCAGCCGCGGTAATAC  
GTAGGGTGCAGCGCTTGTCCGGAATTACTGGGCGTAAAGAGCTTGTAGGCGGTCTGTAC  
GTCTTCTGTGAAAACCTTGGGGCTCAACCTTAAGCTTGCAGGGGATACGGGCAGACTAGAG  
TACTTCAGGGGAGACTGGAATTCCTGGTGTAGCGGTGAAATGCGCAGATATCAGGAGGAA  
CACCGGTGGCGAAGGCGGGTCTCTGGGAAGTAAGTACGCTGAGAAGCGAAAGCGTGGGT  
AGCGAACAGGATTAGAAACCCGCGTAGTCC

>Otu6060

CCAGCCTATGGGGGGCAGCAGTGGGGAATATTGGACAATGGGGGCAACCCTGATCCAGCG  
ATGCCGCGTGGGTGAAGAAGGCCTTCGGGTGTAAAGCCCTTTAGGTTGGGAAGAAGAGT  
GTAGTGATACACTTTGACGGTACCAACAGAATAAGCACCGGCAAACCTCTGTGCCAGCAGC  
CGCGGTAATACAGAGGGTGCAGCGTTAATCGGATTTACTGGGCGTAAAGGGCGCGTAGG  
CGGTTTAGTGAGTGTGGTGTGAAAGCCCCGGGCTTAACCTGGGAAGTGCATCGCAAACGA  
CTGAACTGGAGTATAAGAGAGGGTGGCGGAATTTCCGGTGTAGCGGTGAAATGCGTAGAG  
ATCGGAAGGAACGTCAATGGCGAAGGCAGCCACCTGGCTTAATACTGACGCTGAGGCGCG  
AAAGCGTGGGGATCAAACAGGATTAGATACCCTTGTAGTCC

>Otu6074

CCAGCCTACGGGTGGCAGCAGTCGAGAATCTTCCGCAATGGACGAAAGTCTGACGGAGCG  
ACGCCGCGTGGTTGATGAAGTCCTTAGGGACGTAAAAACCTTTTATGTGGGAGAAAGTCA  
TTGATAGTACCACATGAATAAGGGGTTGCTAAACTCGTGCCAGCAGCAGCGGTAATACGA  
GTGCCCCAAGCGTTATCCGGAATTATTGGGCGTAAAGGGTGTGTAGGTGGTTGTGTTAGT  
CTCTTGTTAAAGCTCTCGGCTCAACCGGGAACATGCAGGGGAAACGGCACAACTAGAGGA  
TGTGAGAGGTCTGTGGAACCATGGTGTAGGGGTGAAATCCGTTGATATCATGGGGAAACA  
CCAAAAGCGAAGGCAGCAGACTGGCGCATTCCTGACACTGAAACACGAAAGCGTGGGGAG  
CAAACAGGATTAGAAACCCAGTAGTCC

>Otu6076

CCAGCCTATGGGATGCACCAGTCGAGAATATTTCGACAATGGGCGAAAGCCTGATCGAGCG  
ACGCCGCGTGCAAGGATGAAGGCCTTCGGGTGCTAAACTGCGGTAGTAGGTCAGCAATGCA  
AATGAGCAACCTACGGAAAGAGGTGGGTAACTACGTGCCAGCACCAGCGGTAATACGTAG  
ACCTCAAGCGTTATCCGGATTTATTGGGCGTAAAGCGTGTGTAGGAGGTTTCGATGCGTCT  
CATGTTAAAGCCCACCGCTCAACGGTGGATCTGCGTGGGATACGATCGAGCTCGAGGGGG  
TTAGAGGTGCATGGAACCTACGGTGTAGGGGTGACATCCGTTGATATCGTGGGGAAACACC  
GAAGGCGAAGGCAGTGCACCTGGGACCTTCCTGACTCTGAGACACGAAAGCGTGGGGAGCA  
AAAAGGATTAGAAACCCGTTAGTCC

>Otu6083

CCAGCCTATGGGGGGCTCCAGTGGGGAATATTGGACAATGGGCGCAAGCCTGATCCAGCA  
ATACCGTGTGTGTGAAGAAGGCCTTTGGGTGTAAAGCACTTTTGTGGGGGAAGAAGGGG  
TATGGATGAATAGTTCATATTTTTGACGTTACCCCAAGAATAAGCACCGGCTAACTCTGT  
GCCAGCAGCCGCGGTAATACAGAGGGTGCAGCGTTAATCGGAATTATTGGGCGTAAAGG  
GTGTGTAGGTGGTTTGATAAGTTAGGTGTGAAATACCTGGGCTCAACCTGGGTGCTGCAT  
TTAATACTGTTGAGCTGGAGTATGGGAGAGGCAAGTGGAAATTTCCGGTGTAGCGGTGAAA  
TGCGTAGATATCGGAAGGAACATCGGTGGCGAAGGCGGCTTGCTGGACTGATACTGACAC  
TGAGGCACGAGAGCATGGGGAGCAAACAGGATTAGAGACCCTAGTAGTCC

>Otu6092

CCAGCCTACGGGATGCAGCAGTGAAGAATCTTGGGCAATGGACTAACGTCTGACCCAGTG  
AGAATACGTGCATGACGAATGCGCTCAGTTTTCTGTAAAGTGCTTTCAGCGGTGAAGAAG  
AGGTCTGTAATCGCCAGAAGAAGCACCGGCTAATTCCGTGCCAGCAGCCGCGGTAATACG  
GAAGGTGCGGGCGTTATTTCGTTTTGATTGGGTGTAAAGGGTATGTAGGCGGTGTTGTTG  
TTGTTTAGGGCAAAAAGCGGAGTTTTCTATGCTCTGTCCATTTAGCGACACACAGCTT  
GAGTTAAAGATAGGTTCGGAATAATTCCTGTGTAGGGGTAGAATCCATCCATACAGGAAC  
GAGTGCCAACCGGCGAAGGCATCCCTCTCGCTTTAACTGACGCTAAGGTACGGAAGCCTA  
GGGCGCAAACGGGATTAGAGACCCCGTAGTCC

>Otu6099

CCAGCCTACGGGGCGCTGCAGTCGAGAGGCTTCGGCAATGGGGGAAACCCTGACCGAGCG  
ACGCCGCGTGGGCGATGAAGGCCGTTAGGTTGTAAAGCCCTGTGAGCGGGAAGAAATGC  
AAGCGGGTAAACAATCCGCTTGTTTGACGGTACCGTTAAAGGAAGCTCCGGCCAACTCCG  
TGCCAGCAGCCGCGGTAATACGGGGGGAGCAAACGTTGTTTCGGAATTACTGGGCGTAAAG  
GGCGTGCAGGCGGCCTTGTAAGTGGAAATGTGAAATGCCCTGGCTCAACCAGGGAACCTGCA



TCCCAGACTGCAAGGCTTGAGTATAGGAGAGGATGGGGGAATTCCCGGTGTAGCGGTGAA  
ATGCATTGATATCGGGAGGAACACCAGTGGCGAAGGCGCCCATCTGGCCTAATACTGACG  
CTCAGGCGCGAAAGCTAGGGGAGCAAACAGGATTAGAGACCCTGGTAGTCC

>Otu6100

CCAGCCTACGGGGTGCTGCAGGCGCGAAACCTTTACAATGCACGAAAGTGTGATAGGGGG  
ACTCGAAGTGCTTATACAATAGTATAGGCTTTTGCCAACTCGAAATTGGTTGGAGAATAA  
GTGGTGGGCAAGACTGGTGCCAGCCGCCGCGGTAACCCAGCGCCACAAGTGGGAATCGG  
TATTATTGGGTCTAAAGCGTCCGTAGCAGGTCTGCTAAATTGCTTGTGAAATCGCATCGC  
TCAACGGTGCGGATTGCAGGTAAGACTGACAGACTAGAGACTGGGAGACGTTGGAGGTAT  
TCAAAGGGGAGCGGTAAAATGCGAGAATCCTTTGAAGACCACCTGTTGCGAAGGCGTCCA  
ACAATAACAGGTCTGACTGTGAGGGTCGAAAGCTAGGGGAGCGAACCGGATTAGAGACC  
TAGTAGTCC

>Otu6104

CCAGCCTACGGGGGGGACCAGTGGGGAATTTTCCACAATGGGCGCAAGCCTGATGGAGCA  
ACGCCGCGTGTGTGATGAAGGTCTTCGGATCGTAAAGCACTTTCGACCGGGACGAAGAAC  
CTCTGGCTAACATCCAGGGGCTGACGGTACCGGGAGAAGAAGCACCGGCTAACTCTGTG  
CCAGCAGCCGCGGTAATACAGAGGGTGCAAGCGTTGTTTCGGAATTATTGGGCGTAAAGCG  
CGTGTAGGCGGCTTTGCAAGTCAGATGTGAAAGCCCTCGGCTCAACCGAGGAAGTGCCTC  
TGAAACTGCAGAGCTTGAGTACCGGAGAGGGTGGCGGAACCTCTGCAAGTAGAGGTGAAAT  
TTGTAGATATGCGGAAGAACACCGGTGGCGAAGGCGGCCACCTGGACGGTCACTGACGCT  
GAGACGCGAAAGCGTGGGGAGCAAACAGGATTAGAAACCCCAGTAC

>Otu6105

CCAGCCTACGGGACGCAGCAGTGGGGAATATTGCACAATGGGCGAAAGCCTGATGCAGCG  
ACGCCGCGTGGAGGATGACGGTCTTCGGATTGTAAACTCCTGTTAAGTGGGAAGAAAGAC  
TGGCATCTAATACATGCTGGGGATGACGGTACCACTAGAGAAGGCACCGGCAAACCTTCGT  
GCCAGCAGCCGCGGTAATACGAAGGGTGCAAGCGTTATTTCGGAATGACTGGGCGTAAAGA  
GCGTGAAGGCGGTCCTTTAAGTCATTTGTTAAAGCGCTCGGCTTAACCGAGCATATGCGA  
GTGAAACTGAAGGGCTAGAGTACAGGAGAGAAAGGTAGAATTCTCGGAGTAGCGGTAAAA  
TGCGTAGATCTCGAGAGGAATACCGGTTGCGAAGGCGGCCCTTTTGGCCTGTTACTGACGC  
TTAAGCGCGAAAGCGTGGGGAGCAAACAGGATTAGAGACCCTAGTAGTCC

>Otu6106

CCAGCCTACGGGTTGCAGCAGTCGCGAAACCTTCGCAATGCGCGAAAGCGTGACGAGGGT  
AATCTGAGTGCGAACTTTTAGTTCGCTTTTAGTCAGTTTGAATAACTGGCTGAATAAGGG  
GTGGGTAAATCCTGTGCCAGCCGCCGCGGTAACACAGGTAGCCCGAGTAGTGCCACGAA  
TATTGAGTCTAAAACGCGCGTAGCCGGCACAGCCAGTTCCTTGTGAAATGCACGAGCCTA  
ACTCGTGCGCGCGCAGGGAATACTACTGTGCTTGGGAGTGGAGGAGGCAGAGGGTACTTT  
AGGGGGAGGAGTAAAATCCTGTAATCCTTAAAGGACCATCGGTGGCGAAAGCGCTCTGCC  
AAGACACGTCCGACGGTGAGGCGCGAAGGCTAGGGGAGCAAATCGGATTAGAAACCCGCG  
TAGTCC

>Otu6112

CCAGCCTATGGGTCGCTGCAGTGAGGAATATTGGTCAATGGGCGCAAGCCTGAGCCAGCC  
ATGCCGCGTGAAGGATGAAGGCCCTTCTGGGTGTGAAACTTCTTTTATGGGGGAAGAAAAT  
TACGGTATCTACTGTAACCGACGGTACCCTAGGAATAAGCACCGGCTAACTCCGTGCCAG  
CAGCCGCGGTAATACGGAGGGTGCAAGCGTTATCCGGATTACTGGGTTTAAAGGGTGTG  
TAGGCGGGCCCTTAAGTCAGTGGTGAAATCTCCGAGCTCAGCTTGGAACCTGCCATTGAT  
ACTATAGGTCTTGAATTTTGTGAGGTGGGCGGAATAAGTCATGTAGCGGTGAAATGCAT  
AGATATGACTTAGAACCCCGATTGCGAAGGCAGCTCACTAAACAACATTGACGCTGAGG  
CACGAAAGCGTGGGGATCAAACAGGATTAGAAACCCTAGTAGTCC

>Otu6114

CCAGCCTATGGGTGGCAGCAGTGAGGAATATTGGTCAATGGACGCAAGTCTGAACCAGCC  
ATGCCGCGTGAAGGATGAAGGCCCTTCTGGGTGTGAAACTTCTTTTATCTGGGAAGAAACC  
TCCGATTTCTATTGGAGCCGACGGTACCAGAGGAATAAGCACCGGCTAACTCCGTGCCAG  
CAGCCGCGGTAATACGGAGGGTGCAAGCGTTATCCGGATTCACTGGGTTTAAAGGGTGTG  
TAGGCGGGTATTTAAGTCAGTGGTGAAATCTCCGGGCTCAACCCGGAAACTGCCATTGAT  
ACTATATATCTTGAATACTGTTGAGGTAGGCGGAATATGTCATGTAGCGGTGAAATGCAT  
AGATATGACATAGAACACCGATTGCGAAGGCAGTTCACCTAAGCTTGCAATTGACACTGAGG  
CACGAAAGCGTGGGGATCAAACAGGATTAGATACCCTAGTAGTCC

>Otu6118

CCAGCCTATGGGACGCAGCAGCGAGGAATATTGGTCAATGGACGAAAGTCTGAACCAGCC  
ATGCCGCGTGAAAGGATGACTGCCCTATGGGTTGTAAACTTCTTTTGTACGGGACGAATCT  
TTCCTACGTGTAGGGAAGTACGGTACTGTACGAATAAGCATCGGCTAACTCCGTGCCAG  
CAGCCGCGGTAATACGGAGGATGCAAGCGTTATCCGGATTTATTGGGTTTAAAGGGTGCG  
TAGGCGGGACTGTAAGTCAGTGGTGAATCTTGCAGCTTAAGTGTAAAATTGCCATTGAT  
ACTGCAGTTCTTGAGTCCAGTTGAAGTCGGCGGAATGTGTAGTGTAGCGGTGAAATGCTT  
AGATATTACACAGAACACCAATTGCGAAGGCAGCTGACTAACTGTCACTGACGCTGAGG  
CACGAAAGCGTGGGGAGCAAACAGGATTAGATACCCTTGTAGTCC

>Otu6122

CCAGCCTATGGGAGGCTGCAGTCGAGAATATTCCGCAATGGACGAAAGTCTGACGGAGCG  
ACGCCGCGTGAGGATGAAGTATTTCCGGTATGTAAACTCCTTTTGTAGACTAGTAATTTT  
TGAACAGTCTAAGAATAAGAGGTTTCTAAACTCGTGCCAGCAGAAGCGGTAATACGAGTG  
CCTCAAGCGTTATCCGGAATTATTGGGCGTAAAGGGTGTGTAGGTGGTTTTGTAGTCTT  
TTGTTAAATTTCTCGGCTTAACCGAGAACTTGCAAGAGAAACGGCAAGACTTAGAGTATG  
CGAGGGGTCTGTGGAAGTCATGGTGTAGCAGTGAATGCGTTGATATCATGGGGAACACC  
AAAAGCGAAGGTAGCAGACTGGAGCATTACTGACACTGAAACACGAAAGCGTGGGTAGCG  
AATGGGATTAGATACCCAGTAGTCC

>Otu6124

CTAGCCTACGGGAGGCTGCAGTCGAGAATCTTCCGCAATGGACGCAAGTCTGACCGAGCG  
ACGCCGCGTGCGGGATGAAGGTCTTCCGGATTGTAAACCGCTGTCCGAGGGGATGAAGTGC  
AGGAGGGTACTCCCTCCTGTTTGACAGAGCCTCGGAGGAAGCACGGGCTAAGTTCGTGCC  
AGCAGCCGCGGTAATACGAACTGTGCGAACGTTATTCCGGAATCACTGGGCTTAAAGGGTG  
CGTAGGCGGCGGCTCCAGTCAGGTGTGAAATCCCCCGGCTCAACCGGGGAACAGCGCTTG  
AAACTAGGTGCGTCGAGTGAGGCAGGGGTGTATGGAAGTTCGGGTGGAGCGGTGAAATGT  
GTAGAGATCGGAAGGAACGCCGGCGGCGAAAGCGGTACACTGGGCCTTGTCTGACGCTGA  
GGCACGAAAGCTAGGGGAGTGAACGGGATTAGAAACCTCGTAGTCC

>Otu6127

CAGCCTACGGGACGCAGCAGTGGGGAATATTGGGCAATGGGCGCAAGCCTGACCCAGCCA  
CGCCGCGTGAGTGATGAAGGCCTTCGGGTGCTAAAGCTCTGTGGGGAGGGACGAATCAGC  
CTCGGGAACAATACCCCGGGGCTTGACGGTACCTCCTTAGCAAGCACCGGCTAACTCCG  
TGCCAGCAGCCGCGGTAATACGGAGGGTGCAAACGTTGCTCGGAATTATTGGGCGTAAAG  
CGCACGTAGGCGGCTTGTTATGTCCGGTGTGAAATCCCTCGGCTTAACCGAGGAAGTGCA  
TTGGAAGTGGCAAGCTTGAGTACGGAAGAGGGTTCGCGGAATTCCCGGTGTAGAGGTGAA  
ATTCGTAGATATCGGGAGGAACACCAGTGGCGAAGGCGGCGACCTGGGCCGATACTGACG  
CTGAGGTGCGAAAGCGTGGGGAGCAAACAGGATTAGAGACCCTAGTAGTCC

>Otu6151

CCAGCCTATGGGGGGCACCAGTGGGGGATATTGGACAATGGGGCAACCCTGATCCAGCAA  
TGCCGCGTGTTGTAAGAAGGCCTGAGGGTTGTAAAGCACTTTCAGTGGGGAGGAGGATTA  
GTTGGTTAAGAGCTGATTAATTGGACGTTACCCACAGAAGAAGCACCGGCTAACTCCGTG  
CCAGCAGCCGCGGTAATACGGAGGGTGCGAGCGTTAATCGGAATAACTGGGCGTAAAGGG  
TGCGTAGGTGGTTTTATAAGTTATCTGTGAAATACCCGGGCTCAACCTGGGCAGGTCAGA  
TAAGACTGTAAGACTCGAGTACAGGAGAGGGTAGTGGAATTTCCGGTGTAGCGGTGAAAT  
GCGTAGAGATCGGAAGGAACACCAGTGGCGAAGGCGGCTACCTGGCCTGATACTGACACT  
GAGGCACGAAAGCGTGGGGAGCAAACAGGATTAGAGACCCGCGTAGTCC

>Otu6152

CCAGCCTACGGGGTGCACCAGTGGGGAATTTTGGACAATGGGCGAAAGCCTGATCCAGCA  
ACTCTGCGTGAGGGACGAAGCCCTTCGGGGCGTAAACCTCTTTTATTGGGGACGAATGCC  
CGCAAGGGCTTGACGGTACCCAGTGAATAAGCCACGGCTAACTATGTGCCAGCAGCCGCG  
GTAAGACATAGGTGGCGAGCGTTATTCGGAATTACTAGGCGTAAAGCGAGTGTAGGCGGG  
CGCTTAAGTCTGTTGTGAAATCTCCCGGCTTAAGTGGGAGGGGTCAATGGATACTGGGCG  
TCTTGAGTGGGGTAGGGGTACTGGAATTCGCGGTGTAGCGGTGAAATGCGTAGATATCG  
GGAGGAACACCTATGGCGAAAGCAGGTACCTGGGCCCTTACTGACGCTAAGACTCGAAAG  
CTAGGGGAGCAAACAGGATTAAAACCCAGTAGTCC

>Otu6160

CCAGCCTATGGGTTGCACCAGTAAGGGATATTGCGCAATGGGCGAAAGCCTGACGCAGCA  
ACGCCGCGTGAGGATGACGGTTTTCCGGATTGTAAACTCCTTTTTTGAAGGGACGAGGAAG  
GACGGTACCTTCAGAATAAGTACGGCTAACTACGTGCCAGCAGCCGCGGTAAAACGTAG  
GTGGCGAGCGTTATCCGGATTACTGGGTGTAAAGCGTGTGCAGGCGGATGGTCAAGTGG

TGTATGAAATCGCCCGGCTCAACCGGGCGGGGTTATGCCAGACTGGTCATCTGGAGTGCG  
AGAGAGGGGCGTGGAATTCCGGGTGTAGTGGTGAAATGCGTAGAGATCCGGAGGAACCC  
AGAGGCGAAGGCGGCGCCCTGGCTCGCAACTGACGCTCAGACACGACAGCATGGGGAGCG  
AACGGGATTAGAAACCCGAGTAGTCC

>Otu6161

CCAGCCTACGGGGGGCAGCAGTCGAGAATTTTTCTCAATGGGCGAAAGCCTGAAGGAGCG  
ACGCCGCGTGCGGGGATGAATGGCTTCGGCCCGTAAACCCCTGTCATTTGCGAACAAATTG  
ACTCACCTAACACGTGTGTCATTGATTGTAGCGGAAGAGGAAGGGACGGCTAACTCCGTG  
CCAGCAGCCGCGGTAATACAGAGGTCCCAAGCGTTGTTTCGGATTCACTGAGCGTAAAGGG  
TGCGTAGGCGGTTTGACAAGTCTGATGTGAAATCCCGCAGCTTAACTGCGGAAGTGCATT  
GGAAACTGTTTGACTAGAGGAATGGAGGGGAGACTGGAATACTTGGTGTAGCAGTGAAAT  
GCGTAGATATCAAGTGGAACACCAGTGGCGAAGGCGAGTCTCTGGACATTTCTCTGACGCT  
GAGGCACGAAAGCCAGGGGAGCAAACGGGATTAGAGACCCTCGTAGTCC

>Otu6163

CCAGCCTATGGGGTGCTGCAGTCGAGAATATTTCCCAATGGACGAAAGTCTGAGGGAGCG  
ACGCCGCGTGCGAGGATGAAGGGCTTCGGCTCGTAAACTGCTTTTACCAGGGAAGAATCAT  
GACGGTACCTGGAGAATAAGAGGTTGCTAACTCTGTGCCAGCAGCAGCGGTAATACAGAG  
ACCTCAAGCGTTATCCGGATTTATTGGGCGTAAAGGGTCCGCAGGTGGTCGTGTGCGTCG  
GTGGTTAAATTTTCGGGCTCAACCCGGAAACTGCTGCCGATACGACTCGACTAGAGGCCG  
GGAGAGGTAAGCGGAATTGCCGGTGTAGTAGTAATATGCGTTGATATCGGCAAGAACACC  
AAATGCGTAGGCAGCTTACTGGAACGCGCCTGACACTCAGGGACGAAAGCGTGGGGAGCG  
AAAGGGATTAGAAACCCTAGTAGTCC

>Otu6165

CCAGCCTACGGGGCGCAGCAGTGAGGAATTTTGGACAATGGGGGCAACCCTGATCCAGCG  
ACGCCGCGTGAGAGGACGAAGGTCTTCGGATTGTAAACTCCTTTTGCAGGGGACGAATGAG  
TACCGTAACCCGATACTGTGACGGTACCCTGTGAATAAGCCACGGCTAACTTCGTGCCAG  
CAGCCGCGGTAAGACGAAGGTGGCTAGCGTTACTCGGAATTACTAGGCGTAAAGGGCAGG  
TAGGCGGCTCGGTGAGTCTATTGTGGAATCTTCCGGCTTAACTGGAAGGGGTCAATAGAT  
ACTGCCGGGCTTGAGTGTGTGAGAGGGTGTGGAATTCCCGGTGTAGCGGTGAAATGCGT  
AGATATCGGGAGGAACACCTATGGCGAAAGCAGGCACCTGGCACATTACTGACGCTGAGC  
TGCGAAAGCTAGGGGAGCAAACAGGATTAGATACCCGGGTAGTCC

>Otu6167

CCAGCCTATGGGTGGCTGCAGCAAGGAATAGTGGGCAATGGGCGAAAGCCTGACCCAGCA  
ACGCCGCGTGAGAGGATGAAGGCCTTCGGGTGTAAACTCCTGTGAGAAGGGACGAAGGTG  
TAATAGTGAATAACTGTTGCAGTTGACGGTACCTTCAAAGGAAGCCCCGGCTAATTACGT  
GCCAGCAGCCGCGGTAATACGTATGGGGCAAGCGTTACTCGGATTTACTGGGCGTAAAGG  
GCGCGTAGGTGGTGAAGAAAGTCAAATGTGAAAACCCATGGCTCAACTGTGGATCCGCAT  
TTGAAACTTCTTTACTTTGAGTTCAGGTGAGGAGAATGGAATTCCCGGTGTAGGGGTGAAA  
TCTGTAGATATCGGGAAGAACACCAGTGGCGAAGGCGATTCTCTAACCTGATACTGACAC  
TGAGGCGCGAAAGCGTGGGGAGCAAACAGGATTAGATACCCTAGTAGTCC

>Otu6169

CCAGCCTATGGGTTGCAGCAGTAAGGGATATTTGCGCAATGGGCGAAAGCCTGACGCAGCA  
ACGCCGCGTGAGGAAGAAGGCCTTCGGGTGTAAACTCCTTTTGTGAGGGACGAGGAAG  
GACGGTACCTCACGAATAAGCCACGGCTAACTACGTGCCAGCAGCCGCGGTAAACGCTAG  
GTGGCGAGCGTTATCCGGATTTACTGGGCGTAAAGCGTGTGCAGATGGGACAGCAAGTGG  
TGTATGAAATCGCTCAGCTTAACTGGGCGGGGTTATGCCATACTGCTATTCTAGAGAACG  
GGAGAGGGACGTGGAATTCCGGGTGTAGTGGTGAAGTGCGTAGAGATCCGGAGGAACCC  
TGAGGCGAAGGCGGCGTCTTGCCCCGATTCTGACATTCAGACACGACAGCATGGGGAGCA  
AACGGGATTAGAAACCCGCGTAGTCC

>Otu6170

CCAGCCTATGGGGGGCAGCAGTGGGGAATTTTGCGCAATGGGGGAAACCCTGACGCAGCG  
ATGCCGCGTGAGAGGACGAAGGTCTTCGGATTGTAAACTCCTTTTACGGGGGACAAATGAC  
GGCGTGAATAACGCCGATGATGGTACTCCGCGAATAAGCCACGGCTAACTTCGTGCCAG  
CAGCCGCGGTAAGACGAAGGTGGCGAGCGTTACTCGGAATTACTAGGCGTAAAGCGCGAG  
CAGGCGGTTTGGTTAGTCCGTCGTGAAAGCCTTGGGCTCAACCCAGGGAGGTGCATGGAT  
ACTGCCAGACTTGAATACGGGAGAGGTGCGTGGAATTCTTGGTGTAGCGGTGAAATGCGT  
AGATATCAGGAGGAACACCAAAGGCGAAGGCAGGTGACTGGACCGTTATTGACGCTGAGT  
CGCGAAAGCCGGGGGAGCAAACAGGATTAGATACCCTCGTAGTCC

>Otu6173

CCAGCCTATGGGTGGCTCCAGTGGGGAATATTGCGCAATGGACGAAAGTCTGACGCAGCG  
ACGCCGCGTGTGGGATGAAGCCTTTTCGGGGTGTAAACCACTGTTGCCCCGGGACGAAACTC  
TCCTTTTCGAGGAGATTGACGGTACCGGGTGAGGAAGCACCGGCTAACTCTGTGCCAGCAG  
CCGCGGTAATACAGAGGGTGCAGCGTTGTCCGGAATCACTGGGCGTAAAGGGCGCGTAG  
GTGGCGGGATAAGCGTGTGGTCAAAGCCCCGGGGCTCAACCCCGTGTCTGCCATGCGGACT  
GTCTTGCTCGAGCGTAGTAGAGGCAGGTGGAATTCCGGGTGTAGCGGTGGAATGCGTAGA  
GATCCGGAAGAACACCGGTGGCGAAGGCGGCCTGCTGGGCTACTGCTGACACTGATGCGC  
GACAGCGTGGGGAGCAAACAGGATTAGATAACCCCTGTAGTCC

>Otu6186

CCAGCCTATGGGGCGCAGCAGTAAGGGATATTGCACAATGGGCGAAAGCCTGATGCAGCA  
ACGCCGCGTGGAGGAAGAAGGCCTTCGGGTGCTAAACTCCTTTGGGTGGGGACGAGGAAG  
GACGGTACCCATCAAACAAGTCACGGCTAACTACGTGCCAGCAGCCGCGGTAAAACGTAG  
GTGGCAAGCGTTATCCGGAATTACTGGGCGTAAAGGGTGTGCAGGCGGGAACATAAGTGG  
TGTATGAAATCTCCCAGCTTAACTGGGATAGGTTATGCCAGACTGTGTTTCTAGAGGACG  
AGAGAGGGGGGTGGAATTCCGGGTGTAGTGGTGAATGCGTAGAGATCCGGAGGAACCCC  
AGGGGCGAAGGCGGCCCCCTGGCTCGTACCTGACGCTCAGCCACGAAAGCATGGGGAGCG  
AACGGGATTAGATAACCCAGTAGTCC

>Otu6198

CCAGCCTACGGGGCGCAGCAGGCGCGAAACCTTCGCAATGCGCGTAAGCGTGACGAGGGG  
ACTCTGAGTGGTATTAGCTCTTGCTAATGCCTTTTGCCCAGTGTAATTCGAGTTGCACA  
CCAACTCGTTATCAAGCTGGGAGAATAAGGGTGTGGGCAAGACTGGTGGCAGCCGCCGCG  
GTAACACCAGCGCCTCGAGTGATACCCACGAATATTGGACCTAAAGCGTTCGTAGCCGT  
CCTGTAAGTCCGCTGTGAAATATTGGGGCTTGACCCTAATGCGTGCAGTGGATACTGCGG  
GACTCGGGAGCGGGGGAGGGAAGAAGTACTTCTGGGGTAGCGGTAAAATGCGTTGAGCCT  
AGAAGGACTTCCAGTGGCGAAGGCGTCTTCTTAAACGCGTCCGACGGTGAGGAACGAAA  
GCTGGGGGAGCAAATCGGATTAGATAACCCGAGTAGTCC

>Otu6201

CCAGCCTACGGGTCGCAGCAGCTAAGAATCTTCCACAATGGGGGAAACCCCTGACGGAGCG  
ACGCCGCGTGGACGATGAAGGCCGTAAGGTTGTAAAGTCCTTTTCTGGTGAAGAATAGG  
CGAGGGAGTGAAAGCCCTTGTGATGACGTTAACCAGGGAATAAGCCCCGGCTAATTACG  
TGCCAGCAGCCGCGGTAATACGTATGGGGCGAGCGTTGTTTCGGAGTTATTGGGCGTAAAG  
GGCGTGTAGGCGGCCCGCCAAGTCTGGTGTGAAAGCGCAGGGCTCAACCCCTGCGTAGGCG  
CTGGAAGTGGCGGGCTTGAGTCTCGAGGGGGAAGCTGGAATTCCTGGTGTAGGGGTGAA  
ATCTGTAGATATCAGGAAGAACACCGGTGGCGAAGGCGAGCTTCTACTCGTGGACTGACG  
CTGAGGCGCGAAAGCGTGGGGAGCAAACAGGATTAGAAACCCGAGTAGTCC

>Otu6206

CCAGCCTGGGGGGCAGCAGTGAGGAATATTGCGCAATGGAGGAACTCTGACGCAGCAAC  
GCCGCGTGGGCGAAGAAGGCCTTCGGGTGTAAAGCCCTGTCAGGTGGGACGAAACCACC  
GATGGTTAATATCCTTCGGAAGTACTGTACCACCAAAGGAAGCACCGGCTAACTCCGTG  
CCAGCAGCCGCGGTAAGACGGAGGGTGAAGCGTTGTTTCGGAATCACTGGGCGTAAAGCG  
CGTGTAGGCGGTCCGAAAAGTCGAGTGTGAAAGCCCGAGGCTCAACCTCGGAAGTGCATT  
CGAAACTCTCGGGCTTGAGTACTGGAGAGGGAAGCGGAATTCCTGGTGTAGAGGTGAAAT  
TCGTAGATATCAGGAGGAACACCGGTGGCGAAGGCGGCTTCCTGGACAGATACTGACGCT  
GAGACGCGAAAGCGTGGGGAGCAAACAGGATTAGAAACCCCGTAGTCC

>Otu6210

CCAGCCTATGGGGGGCAGCAGTTAGGAATTTTCTGCAATGCGCGCAAGCGTGACAGAGCA  
AGCCAGAGTGTTCCTCATAGAGGAACTTTTGCCAAATGCAAAAAGTTTGCGCAATAAGGA  
CTGGGTAAAGACAGGTGCCAGCCGCCGCGGTAATCCCTGCGGTCCAAGTCGCAGCCATCAT  
TATTGGGTCTAAGACATCCGTAGCTTGTTTGGTAAGTTTTCTGTGAAATCCGGCATCTTA  
AGTGTGGGCGTGACAGAGTACTGCCAGGCTAGAGACTGGAAGACGTAAGAAGTATGTT  
CAGAGTAGTAGTGAATATTTTAATCCTGGACAGACTCACAACAGCGAAGGCATCTTACG  
AGGACAGTTCTGACAGTAAGGGATGAAGGCTAGGGTCGCGAAAGGGATTAGATAACCCCC  
TAGTCC

>Otu6216

CCAGCCTATGGGAGGCACCAGTAGGAAATATTGGGCAATGGGCGAAAGCTTGACCCAGTG  
AGAACACATGCATGATGAATGCGCAAAGTTTTCTGTAAAGTGCTTTTCACGATTTCGACGA  
CAATGACGGTAGATCGAGAAGAAGTGCCGGCCAACCTTCGTGCCAGCAGCTGCGGTAAGAC

GAAGGGCGCGGGCGTTATTCGTTATGATTGGGTGTAAAGGGTATGTAGGCGGTTTCCGGG  
TTTTCTTGCCAAAAGAGCGGGGCGTTCCCTTGCGAGGGCAGTTTGAGTAGGAGGCTTGTG  
TTGAGAAGAGGTTTCGGTCAAATTTCTGTTTCAGGGATAGAATTCTAGGAAATAGAAATGAA  
AGCTAGCTAGCGAAAGCGCCCTTCTGGGCTCAACAGACGCTGAGGTACGGAAGCGTAGGT  
AGCAAACAGGATTAGATACCCAGTAGTCC

>Otu6218

CCAGCCTATGGGGTGCTCCAGTCGAGAATCTTCGGCAATGGGCGAAAGCCTGACCGAGCG  
ACGCCGCGTGTGGGATGAAGGCCTTCGGGTGTAAACCGCTGTCAGTGGGGAGGAAATGC  
TGGTGGGTTTCTCCCATCAGTTTGACCTATCCGCAGAGGAAGTACGGGCTAAGTTCGTGCC  
AGCAGCCGCGGCAACACGAACCGTACGAACGTTATTTCGGAATTACTGGGCTTAAAGGGTG  
CGTAGGCGGCCCCGAAAGTTGGGTGTGAAAGCCCTCAGCTCAACTGAGGAATGGCGCCCA  
AAACTGCCGGGCTTGAGGAAGACAGAGGTGAGTGGAACCTAGGGTGGAGCGGTGAAATGC  
GTTGATATCCTAAGGAACACCAGTGGCGAAAGCGACTCACTGGGTCTTTTCTGACGCTGA  
GGCACGAAAGCTAGGGGAGCGAACGGGATTAGATACCCGCGTAGTCC

>Otu6223

CCAGCCTATGGGTCGCTGCAGTAACGAATCTTCCCCAATGTACGAAAGTATGAGGGAGCG  
ACGCTGCGTGGAGGATGAAGTCCTTCGGGATGTAAACTCCTGTCAGGGATTACCAAGTTC  
TGAGGAATCCAGAGGAAGAGGCGGCTAACTCTGTGCCAGCAGCCGCGTAATACAGAGG  
CCTCGAGCGTTAGGCGGAATCACTGGGCTTAAAGCGTGTGTAGGCGGATTTCTAAGTGCC  
TTGTGAAATCCCATGGCTCAACCATGGAAATGCTCGGCATACTGGGAATCTTGAGCCATC  
TAGGGGCAACTGGAACAAACGGTGGAGCGGTGAAATGCGTAGATATCGTTTGAACGCCA  
ATGGTGAAGACAGGTTGCTGGGGATGTGCTGACGCTGAGACACGAAAGCCAGGGGAGCAA  
ACGGGATTAGAAACCCGAGTAGTCC

>Otu6224

CCAGCCTATGGGAGGCAGCAGTAACGAATATTGGGCAATGGGCGAAAGCCTGACCCAGCG  
ACGCCGCGTGCGGGGGGAAGTCCCTCGGGATGTAAACCGCTGTCAGGGTGAAGAAAGACC  
GCAAGGTTTGATCTAACCCAGAGGAAGCAACGGCTAACTTCGTGCCAGCAGCCGCGGTAA  
TACGAAGGTTGCAAGCGTTGTTTCGGAATCACTGGGCTTAAAGCGTATGTAGGCGGATGAG  
TAAGCGTTTTGTGAAATCCCTCGGCTTAAACCGAGGAATTGCTTGCGGAACTGCTCATCTT  
GAGGCAAATAGGGGTGCATGGAACCTCTTGGTGGAGCGGTGGAATGCGTAGATATCAAGAG  
GAACGCCAGCGGCGAAAGTGCTGCACTGGATTTGTCTGACGCTCAGATACGAAAGCGTG  
GGGAGCAAACGGGATTAGAGACCCCCGTAGTCC

>Otu6226

CCAGCCTATGGTGCTGCAGTAGGGAATATTGCCCAATGGACGAAAGTCTGAGGCAGCAAC  
GCCGCGTGCACGATGAAGGTCTTCGGATCGTAAAGTGCTTTTCTGAGAGATGAGAAAGGA  
CAGTATCTCAGGAATAAGTCTCGGCTAACTACGTGCCAGCAGCCGCGGTAACACGTAGGA  
GGCAAGCGTTATCCGGATTTACTGGGCGTAAAGCGTGTGCAGGCGGTTAGGTAAGTTGGA  
TGTGAAAGCTCCCGGCTTAACTGGGAGAGGTCGTTCAAACTACAAGACTTGAGAGTGGT  
AGAGGAAGGTGGAATTCCGGGTGTAGTGGTGAATGCGTAGATATCCGGAGGAACACCAG  
TGGCGAAAGCGGCCTTCTGGACCATTCTGACACTGATACGCGAAAGCTAAGGTAGCAAA  
CGGGATTAGAAACCCGAGTAGTCC

>Otu6227

CCAGCCTACGGGGCGCTCCAGGCGGAAAACTCTCCAATGCACGAAAGTGTGAGAGGGGA  
ATCCAAGTGCTTACGCATTACGCGTAGGCTTTTTTCAATTGCAAAAAAATTGGAGAATA  
AGTGGTGGGCAAGACCGGTGCCAGCAGCCGCGTAACCCCGGCGCCACAAGTGGAATCG  
TGTATTTGGCCTAAAGCGTCCGTAGCCGGTCTGTACATCCTTTGTGAAATTGTCCCGCT  
TAACGGGGCAGCGTGCAGAGGACACGGCAGAGCTTGGAACCTGGGAGGCGTCAGAGGTATT  
CTTGGGGGAACGGTAAAATGTTATAATCCCAGGAAGACCACCGATGGCGAAGGCATCTGA  
CGAGAACAGACTCGACGGTGAGGGACAAAAGCTAGGGGAGCAAACCGGATTAGATACCC  
CGTAGTCC

>Otu6230

CCAGCCTACGGGAGGCAGCAGTGGGGAATCTTGCGCAATGGACGAAAGCCTGACGCAGCG  
ACGCCGCGTGAGTGAAGAAGGCCTTCGGGTGTAAAGCTCTGTCAAGGGGGACGAAAACC  
TGTCGGTGCATAGCCGGCAGACTGACGGTACCCTTGAGGAAGCACCGGCTAACTCTGTG  
CCAGCAGCCGCGGTAATACAGAGGGTGCAAGCGTTGCTCGGAATTATTGGGCGTAAAGGG  
CAGGTAGGCGGTCTGATTTGTGAGGGGTGAAATCCCTGGGCTTAAACCCAGGAAGTGCCCC  
TGAAACGGTCAGACTGGAGTGCTGGAGAGGATCGTGGAATTCTCGGTGTAGCGGTGAAAT  
CGGTAGAGATCGGGAGGAACACCAGAGGCGAAGGCGGCGATCTGGACAGCAACTGACGCT

CAACTGCGAAAAGCGTGGGATCAAACAGGATTAGAAACCCGAGTAGTCC

>Otu6234

CCAGCCTATGGGGGGCAGCAGTGGGGAATTTTGGACAATGGGGGCAACCCTGATCCAGCC  
ATGCCGCGTGAGTGAAGAAGGCCTTCGGGTGTAAAGCTCTTTCGGACAGAAAGAAATCG  
GTCGGGTAAATAGCTCGACTGGATGACGGTACTGTAAGAAGAAGCACCGGCTAACTACGT  
GCCAGCAGCCGCGGTAATACGTAGGGTGCAGCGTTAATCGGAATTACTGGGCGTAAAGC  
GCGCGCAGGCGGTTTTGTAAAGACAGCTGTGAAATCCCCGGGCTCAACCTGGGAACTGCGG  
TTGTGACTGCAAGACTTGAGTACGGCAGAGGGGGGTGGAATTCCTGGTGTAGCAGTGAAA  
TGCGTAGATATCAGGAGGAACACCGATGGCGAAGGCAGCCCCCTGGGCCTGTACTGACGC  
TCATGCACTAAAGCGTGGGGAGCAAACAGGATTAGAGACCCCCGTAGTCC

>Otu6235

CCAGCCTATGGGGTGCAGCAGTCGCGAAAACCTCCACAATGTGGGAAACCACGATGGGGGA  
ACTCCAAGTGACATACTTTGTATGTGCTTTTCTTCTGCCTAAAAAGCAGGAGGAATAAG  
GGCCGGGTAAGACGGGTGCCAGCCGCCGCGGTAATACCCGCGGCCCGAGTGGTGCTCATT  
ATTATTGAGCCTAAAGCGTCCGTAGCTGGTTCTGTAAATCTCTGGGTAAATCGGGCAGCT  
TAACTGTCCGAATTCCGGAGAGACTGCAGGACTTGGGACTGGGAGAGGTTGAAGGTACTC  
CAGGGGTAGGGGTAAAATCCTGTAATCCTTGGGGGACCACCAGTGGCGAAGGCGTTCAAC  
TAGAACAGATCCGACAGTAAGGGACGAAGCCCTGGGGCGCAAACGGGATTAGAAACCCCC  
GTAGTCC

>Otu6236

CCAGCCTACGGGGCGCTGCAGTGGGGAATTTTGGACAATGGGGGCAACCCTGATCCAGCC  
ATTCCGCGTGAGTGAAGAAGGCCTTCGGGTGTAAAGCTCTTTCGGCAGGAACGAAACGG  
TGATCCCTAATACGGGTACTAATGACGGTACCTGAAGAAGAAGCACCGGCTAACTACGT  
GCCAGCAGCCGCGGTAATACGTAGGGTGCAGCGTTAATCGGAATTACTGGGCGTAAAGC  
GTGCGCAGGCGGTTTTGTAAAGACAGCTGTGAAATCCCCGGGCTTAACCTGGGAACTGCGG  
TTGTGACTGCAAGACTAGAGTCAGGCAGAGGGGGGTGGAATTCACGTCTAGCAGTGAAA  
TGCGTAGAGATGTGGAGGAACACCGATGGCGAAGGCAGCCCCCTGGGCTATGACTGACGC  
TCATGCACGAAAAGCGTGGGGAGCAAACAGGATTAGAGACCCCAGTAGTCC

>Otu6239

CCAGCCTACGGGAGGCAGCAGTGAGGAATATTGGTCAATGGACGCAAGTCCGGACCAGCC  
ATGCCGCGTGAAGGATGAAGGCCTTCTGGGTGTAAACTCTTTTATCTGGGAAGAAACC  
TCTGATTTCTATTAGAGCCGACGGTACCAGAGGAATAAGCACCGGCTAACTCCGTGCCAG  
CAGCCGCGGTAATACGGAGGGTGCAAGCGTTATCCGGATTCACTGGGTTTAAAGGGTGTG  
TAGGCGGGCAATTAAGTCAGCGGTGAAATCTCCGGGCTCAACCCGGAAACTGCCATTGAT  
ACTATTTGTCTTGAATTTTGTGAGGTAGGCGGAATAAGTCATGTAGCGGTGAAATGCAT  
AGATATGACTTAGAACACCGATTGCGAAGGCAGCTTACTAAGCAAACGTTGACGCTGAGG  
CACGAAAGCGTGGGGATCAAACAGGATTAGAAACCCCCGGTAGTCCG

>Otu6242

CCAGCCTATGGGAGGCAGCAGCGGGGAATATTGGACAATGGGCGCAAGCCTGATCCAGCA  
ATGCCGCGTGGGTGAAGAAGGTCTTCGGATTGTAAAGCCCTTTCGGCGGGGACGATGATG  
ACGGTACCCGCGAGAAGAAGCCCCGGCTAACTTCGTGCCAGCAGCCGCGGTAATACGAAGG  
GGGCTAGCGTTGCTCGGAATGACTGGTTCGTAAAGGGCGCGTAGGCGGTTGACACAGTCAG  
GCGTGAAATTCCCGGGCTTAACCTGGGGGCTGCGCTTGATACATGTTGACTTGAGTGTGG  
AAGAGGGTCGTGGAATTCACAGTGTAGAGGTGAAATTCGTAGATATTGGGAAGAACACCA  
GTGGCGAAGGCGGCTATCTGGACGGTTACTGACGCTGAGGCGCGAAAGCGTGGGGAGCAA  
ACAGGATTAGATACCCGCGTAGTCCG

>Otu6244

CCAGCCTACGGGAGGCTGCAGTCGAGAATCTTCCGCAATGGGGGAAACCCTGACGGAGCG  
ACGCCGCGTGGAGGATGAAGTACTTCGGTATGTAAACTCCTTTTGCCGGGGACGAAATTA  
TTGACGGTACCCGGAATAAGAAGTTGCTAAACTCGTGCCAGCAGCAGCGGTAATACGA  
GTGCTTCGAGCGTTATCCGGAATTATTGGGCGTAAAGGGTGTGTAGGCGGTTTCGTTAGT  
CTCGCGTAAAATTCCTCGGCTCAACCGAGGGCGCGCGTGGGAAACGGCGAAACTTGAGGA  
CGGAAGGGGTCTTCGGAACCATGGTGTAGCGGTGAAATGCGTTGATATCATGGGGAAACA  
CCAAAAGCGAAGGCAGAAGACTGGTCCGCTCCTGACACTGAAACACGAAAGCGTGGGTCG  
CGAATGGGATTAGAAACCCTGGTAGTCC

>Otu6249

CCAGCCTACGGGAGGCTGCAGTGGGGAATTTTGGACAATGGGCGCAACCCTGACGCAGCA  
ACTCCGCGTGAGTGAGGAAGGTTTTTCGGACCGTAAGCTCTGTGAGCGGGAAGAAATGC

CTGGAAGCCAATACCTTTTCAGGCTTGACGGTACCGCTAAAGGAAGCACCGGCTAACTCCG  
TGCCAGCAGCCGCGGTAATACGGGGGGTGCAAGCGTTGTTTCGGAATCATTGGGCGTAAAG  
AGCGTGTAGGCGGCTTAGTAAGTCAGATGTGAAAGCCCTGGGCTTAACCCAGGAAGTGCA  
TTTGAAGCTGCTGAGCTTGAGTAAGGGAGAGGAAAGTGGAATTCCTGGTGTAGAGGTGAA  
ATTCGTAGATATCAAGAGGAACACCGGTGGCGAAGGCGACTTTCTGGCCCTATACTGACG  
CTGAGACGCGAGAGCGTGGGTAGCAAACAGGATTAGATACCCTCGTAGTCC

>Otu6250

CCAGCCTACGGGTGGCTGCAGTGGGGAATATTGCGCAATGGGCGAAAGCCTGACGCAGCG  
ACGCCGCGTGAGGGAAGAAGGCCTTCGGGTCGTAAACCTCTTTTCCTAGGGAAGAATAAT  
GACGGTACCTGGGGAATAAGTCACGGCTAACTACGTGCCAGCAGCCGCGGTAATACGTAG  
GCGGCGAGCATTATCCGGATTTATTGGGCGTAAAGCGAGTGTAGGTGGTTTTTCAAGTCG  
GATGTAAAATTTCCCGGCTCAACTGGGAAGGGTCATTCGATACTGTTAACTAGAGGGCA  
GTAGAGGGAGGTGGAATTTCCCGGTGTAGTGGTGAAATGCGTAGATATCGGGAGGAACACC  
AGTGCGGAAAGCGGCCTCCTGGACTGTACCTGACACTGAGGCTCTAAAGCGTGGGTAGCA  
AACAGGATTAGATACCCTGGTAGTCC

>Otu6259

CCAGCCTACGGGAGGCACCAGTAGGGAATATTGCACAATGGGCGGAAGCCTGATGCAGCA  
ACGCCGCGTGACGATGAAGGCCTTCGGGTCGTAAAGTGCTTTTCGGGAGATGAGGAAG  
GACAGTATCCCCGGAATAAGGATCGGCCAACTACGTGCCAGCAGCCGCGGTAAGACGTAG  
GATCCGAGCGTTATCCGAATTCACTGGGCGTAAAGCGCGTGACAGGCGGCCTGCTAAGTTG  
GATGTAAAACCTCCCGGCTCAACTGGGAGAGGACGTACAATACTAGCGGGCTAGAGGGCA  
GTAGAGGGAGGTGGAATTTCCCGGTGTAGTGGTGAAATGCGTAGATATCGGGAGGAACACC  
AGTGCGGAAAGCGGCCTCCTGGGCTGCACCTGACGCTGAGATGCGAAAGCTAGGGGAGCA  
AACGGGATTAGAGACCCGCGTAGTCC

>Otu6262

CCAGCCATGGGGGGCTGCAGTCGAGAATTTTTTCACAATGGGCGAAAGCCTGACGCAGCAA  
CGCCGCGTGTGTGATGAAGGTCTTCGGATCGTAAAGCACTGTCGCGAGGGACGAGAAGCC  
ATCTGTGAACAGCGGATGGATAAGACGGTACCTCGAGAGGAAGCACCGGCTAACTCTGTG  
CCAGCAGCCGCGGTAATACAGAGGGTGCGAGCGTTGTTTCGGAATTATTGGGCGTAAAGCG  
CTTGTAGGCGGTCTGTCAAGTCTATCGTGAAATCCCTTGGCTCAACCAAGGAAGTGCAGT  
AGATACTAGCGGACTAGAGTGCCGGAGAGGGTTCGCGGAATTTCCCGGTGTAGAGGTGAAAT  
TCGTAGATATCGGGAGGAACACCAGTGGCGAAGGCGGCGACCTGGACGGACACTGACGCT  
GAGACGCGAAAGCGTGGGGAGCAAACAGGATTAGAAACCCTTGTAGTC

>Otu6266

CCAGCCTATGGGGCGCAGCAGTGGGGAATTTTTTCGCAATGGGGGAAACCCTGACGAAGCA  
ACGCCGCGTGAGGATGAAGGCCTTCGGGTCGTAAACTCCTGTGCGACTGGGAAGAAAGCA  
CCCGACCTAATACGTCGAAGTGTGACTGTACCGGTGGAGGAAGCCACGGCTAACTCTGT  
GCCAGCAGCCGCGGTAATACAGAGGTGGCAAGCGTTGTTTCGGAATTACTGGGCGTAAAGG  
GCGCGTAGGCGGTTCCGCAAGTCCCGTGTGAAAGCCCCCGGCTCAACCGGGGAACGGCGC  
GGGAAACTAGCAGGCTTGAGTTTCGGGAGAGGGAAGCGGAATTTCCGGGTGTAGCGGTGAAA  
TGCGCAGATATCCGGAGGAACACCGGTGGCGAAGGCGGCTTCCTGGACCGACACTGACGC  
TGAGGCGCGAAAGCGTGGGGAGCAAACAGGATTAGATAACCCAGTAGTCC

>Otu6267

CCAGCCTACGGGTGCGACCAGTCGAGAATTTTTTCACAATGGGCGCAAGCCTGACCGAGCG  
ACGCCGCGTGCGGGATGAAGGCCTTCGGGTTGTAAACCGCCGTCGGGATGGAGGAAATTC  
CAAGGGGTAATCTCTTTGGATTGACCTATATTAGAGGAAGGACGGGCTAAGTTTCGTGCC  
AGCAGCCGCGGTAAGACGAACCGTCCGAACGTTATTTCGATTCACTGGGCTTAAAGGGTG  
CGTAGGCGGCTCAGAAAGTAGGGTGTGAAAGCCCTCGGCTCAACCGAGGAATTGCGCCCT  
AACTACTGGGCTTGAGGAACGCAGAGGTAAGCGGAACCTTAGGGTGGAGCGGTGAAATGC  
GTTGATATCCTAAGGAACACCAGGAGCGAAAGCGGCTTACTGGGCGTTTCTGACGCTGA  
TGCACGAAAGCTAGGGGAGCGAACGGGATTAGAAACCCGGGTAGTCC

>Otu6270

CCAGCCTATGGGTGGCAGCAGTGAGGAATATTGCTCAATGGGCGAAAGCCTGAAGCAGCG  
ACGTGCGGTGAAGGATGAAATCCGTTAGGATGTAAACTTCTTTTGCAGGGGATGAATGTC  
CCGACTTGTGCGGATTGACCGTACCCTGCGAATAAGCACCGGCCAACTACGTGCCAGCAG  
CCGCGGTAATACGTAGGGTGCAGCGTTGTCCGGAATTACTGGGTGTAAAGGGTCCGTAG  
GCGGGCGAACAAGTCTGTGGTGAAAGTTTCATGGCTCAACCGTGAAATTGCCTCCGATACT  
GTTTGTCTTGAGTTCGAGAGAGGATGATGGAATTCATGGTGTAGCGGTGAAATGCGTAGA

GATCATGAAGAACACCAGTAGCGAAGGCGGTCATCTGGCTCGAAACTGACGCTCAGGGAC  
GAAAGCGTGGGGAGCAAACAGGATTAGAAACCCTAGTAGTCC

>Otu6272

CCAGCCTATGGGACGCTCCAGTAGGGAATATTGGGCAATGGAGGCAACTCTGACCCAGCC  
ATGCCGCGTGAGGATGAAGGCCCTCTGGGTGTAACTGCTTTTATCAGGGAAGAAACG  
CTTGATTTATCCGAGCCTGACGGTACCTGAGGAATAAGCACCGGCTAACTCCGTGCCAG  
CAGCCGCGGTAATACGGAGGGTGCAAGCGTTATCCGGATTTACTGGGTTTAAAGGGTGCG  
TAGGCGGATTGTTAAGTCAGTGGTGAAAGATTCGGGCTCAACCTGGAAACTGCCATTGAT  
ACTGATGATCTCGAGTACATTTGAGGTGGGCGGAATGTGCCATGTAGCGGTGAAATGCTT  
AGATATGACACAGAACATCGATTGCGAAGGCAGCTCACTAACTGTTACTGACGCTGAGG  
CACGAAAGCGTGGGGATCAAACAGGATTAGAGACCCTAGTAGTCC

>Otu6277

CCAGCCTATGGGGGGCTCCAGGCGCGAAAACTCTACAATGCACGAAAGTGTGATAGGGGG  
ACTCAAAGTGCTTATGTTTTACATAGGCTTTTGCCAACTCGAAATTGGTTGGCGAATAAG  
TGGTGGGTAAAGACTGGTGCCAGCCGCCGCGGTAAACCCAGCGCCACAAGTGGGAATCGAT  
TTTATTGGGCTTAAAGCGTCCGTAGCAGGTCTTGTAATTAATTGTTGAAATCAAATAGCT  
TAACTATTTGGAGTGCAGGTAACACTGCTAGACTAGAGACCGGGAGACGTTGGAGGTATT  
CAGAGGGGAGCGGTAAAATGCGAGAATCCTCTGAGGACCACCTGTTGCGAAGGCGTCCAA  
CAATAACGGGTCTGACTGTGAGGGTCGAAAGCTAGGGGAGCGAACC GGATTAGATAACCCG  
TG TAGTCC

>Otu6280

CCAGCCTATGGGTGCGACCAGCGGATCAGGCGGTGCTTTTCAAACCGCAGTTAAGGAGA  
TCGCCTACAAGCATGGAGTGCTGGCTACGTTTATGGCTAAGATTAGCGAGAATCTGCCTG  
GATGCAGTGGACGCGTGATCAATCTCTATGGGATAGCAAAAGCTCGAAGAACCTCTTCT  
ATAGTGATAAGGACAAGTCAGGCATGAGTGAAACGATGAAAAGCTATATAGCGGGTCAAC  
TCCACTGTCTGCCACATATACTGCCTATGGTAGCACCAACGATCAACTCCTACAAGAGAC  
TGGTAGAAGGTGCGTGGGCACCGACCACAGTGACATGGGCAGTAGATAATCGTACGGTAG  
CGCTTCGTGCCTTGCCGGCAGGTAGCAAAATCTACCAGATTAGAAACCCCTCGTAGTCC

>Otu6284

CCAGCCTACGGGACGCACCGGTGAGGAATATTGGTCAATGGGGGCAACCCTGAACCAGCC  
ATGCCGCGTGAGGAAGAAGGCCCTAAGGGTTGTAACTTCTTTTGTACGGGGGTAACT  
CTCTTACGAGTAGGAGATTGAAAGTACTGTACGAATAAGCAACGGCTAACTCCGTGCCAG  
CAGCCGCGGTAATACGGAGGTTGCAAGCGTTATCCGGATTTATTGGGTTTAAAGGGTGCG  
TAGGCGGGTTTGTAAGTCAGTGGTGAAAGACTGTCGCTTAACGATAGCATTGCCATTGAT  
ACTGCAAGTCTTGAGTATACTTGAGGTAGGCGGAATGTGTAGTGTAGCGGTGAAATGCTT  
AGATATTACACAGAACACCAATTGCGAAGGCAGCTTACTAAATTATAACTGACGCTGAGG  
CACGAAAGCGTGGGGATCAAACAGGATTAGAAACCCGGTATCC

>Otu6290

CCAGCCTATGGGTGGCTGCAGCTAGGAATCTTGCGCAATGGGGGAAACCCTGACGCAGCA  
ACGCCGCGTGGGTGAAGAAGGCCCTTCGGGTGTAAAGCCCTTTTAGCTGGGACGAACGCA  
ATGACGGTACCAGCAGAAAAAGCACCGGCTAACTCTGTGCCAGCAGCCGCGGTAATACAG  
AGGGTGCAAGCGTTATTCGGAATTACTGGGCGTAAAGGGCGCGTAGGCGGCTTAGTAAGT  
CGGATGTGAAATCCCTAGGGTCAACTTAGGAATTGCATTGGAAACTGCTTTGCTAGAGTG  
CAGGAGAGGAGGGCGGAATTCCTGGTGTAGAGGTGAAATTCGTAGATATCAGGAGGAACA  
CCGGTGGCGAAGGCGGCTCTCTGGACTGTTACTGACGCTGAGGCGCGAAAGCGTGGGGAG  
CAAACAGGATTAGAAACCCAGTAGTCC

>Otu6291

CCAGCCTACGGGTTGCACCAGTCGAGAATATTCCACAATGGGCGAAAGCCTGATGGAGCG  
ACACCGCGTGAGGATGAAGGTTTTAGGATCGTAACTGCTTTTCTACAAGAGGAGGGTC  
ACGCAAGTGATTTGACAGTACTGTAGGAATAAGGGGTTGCAAACCTACGTGCCAGCAGCCG  
CGGTAATACGTAGACCCCGAGCGTTATCCGGATTTATTGGGCGTAAAGGGTGTGTAGGGG  
GCCAGGTGCGTCTTCTGTAAATCTTGCAGCTTAACTGTGAGGCCGCGAGGAGATACGACC  
AGGCTAGAGAATGCGAGAGGTAGCGGAACGAACGGTGTAGGGGTGAAATCCGTTGATAT  
CGTTCGGAACACCAAAAGCGAAGGCAGCTAACTGGCGCATTTCTGACCCTGAAACACGAA  
AGCGTGGGGAGCAAAAAGGATTAGATAACCCGTGTAGTCC

>Otu6293

CCAGCCTACGGGAGGCACCAGTGGGGAATTTTGGACAATGGGGGCAACCCTGATCCAGCA  
ATGCCGCGTGAGTGAAGAAGGCCCTCGGGTTGTAAAGCTCTTTTGTACAGGAAGAAAAGG



TATCTCCTAATACGGGGTACTGATGACGGTACCTGAAGAATAAGCTCCGGCTAACTACGT  
GCCAGCAGCCGCGGTAATACGTAGGGTGCAAGCGTTAATCGGAATTACTGGGCGTAAAGC  
GTGCGCAGGCGGTTATGCAAGACAGAGGTGAAATCCCCGGGCTCAACCTGGGAACTGCCT  
TTGTGACTGCATGGCTAGAGTGTGTGAGAGGGGGGTAGAATTCACGTGTAGCAGTGAAA  
TGCGTAGATATGTGGAGGAATACCGATGGCGAAGGCAGCCCCCTGGGATAACACTGACGC  
TCATGCACGAAAGCGTGGGGAGCAAACAGGATTAGAAACCCCCGTAGTCC

>Otu6297

CCAGCCTATGGGGCGCACCCAGTCGAGGATCTTCGGCAATGGGCGCAAGCCTGACCGAGCG  
ACGCCGCGTGTGCGATGAAGGCCTTCGGGTGTAAAGCACTGTCGAGGGGGAGGAAGCCG  
CAAGTTGACCTATCCCTGGAGGAAGCACGGGCTAAGTTCGTGCCAGCAGCCGCGGTAAG  
GCGAACCCTGCTAACGTTATTCGGAATCACTGGGCTTAAAGGGCGCGTAGGCGGGTGACC  
AAGTCAGGGGTGAAATCCTTCGGCTTAACCGGAGAACAGCTTCTGATACTGGTCGTCTGG  
AGGGAGGTAGGGGCATGCGGAACCTCCGGTGGAGCGGTGAAATGCGTAGATATCGGAAGG  
AACACCGGTGGCGAAGGCGGCGTGTGACCTCTTCTGACGCTGAGGCGCGAAAGCCAGG  
GGAGCAAACGGGATTAGATACCCCAGTAGTCC

>Otu6299

CCAGCCTATGGGGGGCAGCAGTCGAGAATATTTGGCAATGGGCGAAAGCCTGACCTTGCG  
ACGCCGCGTGTGACGAAGTCCTTCGGGACGTAAGCAGCTTTTGCGCGTGAGGAAGTAA  
TTGACGTTAGCGCGGAATAAGGGGCTCCTAACTCTGTGCCAGCAGGAGCGGTAATACAG  
AGGCCCCGAGCATTATCCGGAATCACTGGGCGTAAAGGGTGTGTAGGCGGTCGCGTTAGT  
CTTTTGTAAGGCGCTCGGGCTTAACCCGGGGACTGCAGGGGAAACGGCGCGGCTTCGAG  
GACGCGAGAGGTAGAGGGAACCTCATGGTGTAGGGGTGAAATCCGTTGATACCATGGGGAA  
CACCAAATGCGAAGGCACTCTACTGGCGCGCTCCTGACGCTGAAACACGAGAGCGTGGGT  
AGCGAATGGGATTAGAAACCCCCGTAGTCC

>Otu6304

CCAGCCTATGGGTGGCACCCAGTAACGAATCTTCGCAATGCACGCAAGTGTGACGGAGCG  
ACGCCGCGTGTGGGACGAAGTCCTTCGGGATGTAAACCACTGTCAGGGGAAAGAAAGTTC  
TGATCTACCCAGAGGAAGGCACGGCTAACTCTGTGCCAGCAGCCGCGGTAAGACAGAGG  
TGCCGAGCGTTAGGCGGAATCACTGGGCTTAAAGCGTGTGTAGGCGGGTCGTTAAGTGTC  
TTGTGAAATCCCCCGGCTCAACCGGGGAATGGCTGGGCATACTGGCGATCTTGAGCAGTC  
TAGGGGCAGATGGAACAGACGGTGGAGCGGTGAAATGCGTAGATATCGTCTGGAACGCCA  
AAGGTGAAAACAGTCTGCTGGGGACTTGCTGACGCTGAGACACGAAAGCCAGGGGAGCGA  
ACGGGATTAGATACCCCTGTAGTCC

>Otu6311

CCAGCCTATGGGGCGCACCCAGCGGGGAATCTTGACAATGGGGGCAACCCTGATGCAGCG  
ACGCCGCGTGAGCGATGAAGCCCTTCGGGTGTAAAGCTCTTTCGGCAGGGAAGATGATG  
ACGGTACCTGCAGAAGCAGCTGCGGCTAACTACGTGCCAGCAGCCGCGGTAATACGTAGG  
CAGCAAGCGTTGTTTCGAGTTACTGGGCGTAAAGGGTGTGTAGGCGGCCTTCTAAGTTTG  
GTGTGAAATCTCCCGGCTCAACCGGGAGGGTGCGCCGAAGACTGGGGGGCTAGAGTGCGG  
GATGGGAGAGTAGAATTCCTGGTGTAGCGGTGAAATGCGTAGATATCAGGAGGAATACCT  
GTGGTGTAGACGGCTCTCTGGACCGCAACTGACGCTGAGACACGAAAGCGTGGGTAGCAA  
ACAGGATTAGAAACCCGGGTAGTCC

>Otu6315

CCAGCCTATGGGGTGCTGCAGTAAGGGATATTGCACAATGGGCGAAAGCCTGATGCAGCA  
ACGCCGCGTGAGGAAGAAGGCCTTCGGGTGCTAAACTCGTTTTGCGTCAGACGAGGAAG  
GACGGTATGACGCGAATAAGTCACGGCTAACTACGTGCCAGCAGCCGCGGTAACACGTAG  
GTGGCAAGCGTTATCCGGATTACTGGGCGTAAAGGGTGTGCAGGCGGGCAGACAAGTGG  
TGTATGAAATGACCAGGCTCAACCTGGAACGGTTATGCCAGACTGTTTGTCTAGAGTGCG  
AGAGAGGGGCGTGGAATTCCGGGTGTAGTGGTGAATGCGTAGAGATCCGGAGGAACCCC  
AGAGGCGAAGGCGGCGCCCTGGCTCGCAACTGACGCTCAGCCACGACAGCATGGGGAGCG  
AACGGGATTAGATACCCTGGTAGTCC

>Otu6317

CCAGCCTACGGGTGACACCAGTGGGGAATATTGGACAATGGGGGAAACCCTGATCCAGCA  
ATGCCGCGTGAGTGATGAAGGCCTTCGGGTGTAAAGCTCTTTTGTTAGGGACGATGATG  
ACGGTACCTAACGAATAAGCTCCGGCTAACATCGTGCCAGCAGCCGCGGTAATACGAAGG  
GAGCTAGCGTTGTTTCGGAATTACTGGGCGTAAAGGTGCGGTAGGCGGCTTGATAAGTTTG  
GTGTGAAAGCCCTGGGCTTAACCTAGGAATAGCATTGAATACTGTCAGGCTAGAGGCCGA  
GAGAGGGGAATGGAATTGCGAGTGTAGAGGTGAAATTCGTAGATATTGCAAGAACACCA

GTGGCGAAGGCGATTTCTGCTCGGTACTGACGCTAAGGCGCGAAAGCGTGGGGAGCAA  
ACAGGATTAGAGACCCCCGTAGTCC  
>Otu6338  
CCAGCCTATGGGAGGCAGCAGTGGGGAATATTGGACAATGGGCGAAAGCCTGATCCAGCA  
ATACCGCGTGTGTGAAGAAGGCCTTCGGGTGTAAAGCACTTTCAGTAGGGAGGAAAGGC  
TCAGAGCTAATATCTCTGAGAGTTGACGTTACCTACAGAAGAAGCACCGGCTAACTCTGT  
GCCAGCAGCCGCGGTAATACAGAGGGTGCAAGCGTTAATCGGAATTACTGGGCGTAAAGC  
GCTCGTAGGCGGATCTTTAAGTCGATTGTGAAATCCCCGGGCTCAACCTGGGAATGGCAC  
TCGAAACTGGAGATCTAGAGTATGATAGAGGAAAGTAGAATTCCTGGTGTAGCGGTGAAA  
TGCGTAGATATCGGGAGGAATACCAGTGGCGAAGGCGGCTTTCTGGATCAATACTGACGC  
TGAGGGGCGAAAGCGTGGGGAGCAAACAGGATTAGATACCCCCGTAGTCC  
>Otu6341  
CCAGCCTACGGGACGCTGCAGTCGAGAATTTTTCTCAATGGGCGAAAGCCTGAGGGAGCG  
ACGCCGCGTGGGGGATGAATGGCTTCGGCCCGTAAACCCCTGTCATTTGTGAACAAATTG  
CTTCACCTAACACGTGAAGCATTGGTTGTAAACGGAAGAGGAAGGGACGGCTAACTCTGTG  
CCAGCAGCCGCGGTAATACAGAGGTCCCAAGCGTTGTTTCGGATTCACTGGGCGTAAAGGG  
TGCGTAGGCGGTTTGATAAGTCTGATGTGAAATCCCGCAGCTTAAGTGCAGAACGGCATT  
GGAAACTATTTGACTAGAGGAATGGAGGGGAGACTGGAATACTTGGTGTAGCAGTGAAT  
GCGTAGATATCAAGTGGAAACACCAGTGGTGAAGGCGAGTCCCTGGACAACCTCTGACACT  
GAGGCACGAAAGCCAGGGGAGCAAACGGGATTAGATACCCGTGTAGTCC  
>Otu6343  
CCAGCCTATGGGTTGCTGCAGTGGGGAATCTTGCGCAATGGGCGAAAGCCTGACGCAGCGA  
CGCCGCGTGGGGGATGAAGCTTCTCGGAGTGTAACCCCTTTCGATCCGGACGAAACGCC  
CGCAAGGGCTTGACGGTACGGGTATAAGAAGCCCCGGCTAACTACGTGCCAGCAGCCGCG  
GTAAAACGTAGGGGGCCAGCGTTGCTCGGAATTACTGGGCGTAAAGGGTTCGTAGGCGGT  
GCGGCAAGTCGGGAGTGAATCTCTGGGCTTAACCCAGAGGCTGCTTCCGAAACTGCCAT  
GCTAGAGTGTGAGAGAGGCGAGTGGAAATTGCAGGTGTAGCGGTGAAATGCGTAGATATCT  
GCAGGAACACCCGTGGCGAAGGCGGCTGGCTGGACCGCAACTGACGCTGAGGAACGAAAG  
CTAGGGGAGCAAACAGGATTAGAAACCCCGGTAGTCC  
>Otu6371  
CCAGCCTACGGGACGCAGCAGTAGGGAATCTTCCGCAATGGACGAAAGTCTGACGGAGCA  
ACGCCGCGTGAGTGATGAAGTCTCTCGGATCGTAAAGCTCTGTTGCCAAGGAAGAACAAC  
CTAAAGAGTAACTGCTTTAGGGATGACGGTACTTGAGAAGAAAGCCCCGGCTAACTACGT  
GCCAGCAGCCGCGGTAATACGTAGGGGGCGAGCGTTGTCCGGAATTATTGAGCGTAAAGC  
GCGCGCAGGCGGTATCTTAAGTCTGATGTTAATCCCAAGGCTCAACCTTGGTTTCGATT  
GGAAACTGGGAACTAGAGTGTAGGAGAGGAAAGTGGAAATCCACGTGTAGCGGTGAAAT  
GCGTAGATATGTGGAGGAACACCAGTGGCGAAGGCGACTTTCTGGCCTATAACTGACGCT  
GAGGCGCGAAAGCGTGGGGAGCAAACAGGATTAGAGACCCCCGTAGTCC  
>Otu6375  
CCAGCCTACGGGTCGCTGCAGTGAGGAATATTGCGCAATGGGCGAAAGCCTGACGCAGCG  
ACGCCGCGTGAGGATGAAGTCTTCGGGTGTAAACTCCTTTCAGTGGGAACGAAATTG  
ACGGTACCCACAGAAGAAGCCCCGGCTAACTACGTGCCAGCAGCCGCGGTGATACGTAGG  
GGGCGAGCGTTGTCCGATTTACTGGGCGTAAAGAGCTCGTAGGCGGTTTGATAAGTCGG  
GTGTGAAACCTCCAGGCTCAACCTGGAGTCGCCACTTGATACTGTCATGACTAGAGTCCG  
GTAGGGGACCATGGAATTCCTGGTGTAGCGGTGAAATGCGCAGATATCAGGAGGAACACC  
AGTAGCGAAGGCGGTGGTCTGGGCCGGTACTGACGCTGAGGAGCGAAAGCGTGGGGAGCG  
AACAGGATTAGATACCCCGGTAGTCC  
>Otu6379  
CCAGCCTATGGGGTGCTCCAGTCAAGAATCTTCCCCAATGGCCGAAAGGCTGAGGGAGCG  
ACGCCGCGTGATGATGAAGTCTTCGGAGTGTAATACTTTTCTCTGGGACGAATTTT  
GACTTTACCAGAGGAATAAGGAGCCGCTAACCTCGTGCCAGCAGCGGCGGTAATACGAGG  
GCTCCAAGCGTTATCCGATTATTGGGCGTAAAGGGTACGTAGGCGGTTTGACGCATCT  
TTCGTTAAATCCTCAGGCTTAACCTGAGGGCCGCGGAAGAGATGATCAGACTAGAGACCG  
GAAGAGGCAAACGGAATTGTTGGTGTAGGGGTAAATCCGTTAATATCAACAAGAACACC  
AAATGCGAAGGCAGTTTGCTAGGACGGTTCTGACGCTGAGGTACTAAAGCGTGGGTAGCG  
AATAGGATTAGAAACCCTAGTAGTCC  
>Otu6393  
CCAGCCTATGGGACGCAGCAGTGGGGAATTTTGCGCAACGGAGGAAACCCTGACGCAGCA

ACGCCGCGTGGAGGATGAAGTCCCTTGGGACGTAAACTCCTTTTCGACCGGGACGATTATG  
ACGGTACCGGTGGAAGAAGCCCCGGCTAACTTCGTGCCAGCAGCCGCGGTAATACGAGGG  
GGGCAAGCGTTGTTTCGAATTATTGGGCGTAAAGGGCGCGTAGGCGGCGCGGTAAGTCAC  
CAGTGAAATCCCCGGGCTCAACTCGGGGCGCTGCTGGCGAAACTGCCGTGCTGGAGTATGG  
GAGGGATGCGTGGAATTCCTGGTGTAGCGGTGAAATGCGTAGATATCGGGAGGAACACCT  
GTGGCGAAAGCGGCGCACTGGACCATAACTGACGCTGAGGCGCGAAAGCTAGGGGAGCAA  
ACAGGATTAGAGACCCGTGTAGTCC

>Otu6435

CCAGCCTACGGGATGCTGCAGTCGAGAATATTCGACAATGGGCGAAAGCCTGATCGAGCG  
ACACCGCGTGCAAGATGAAGGCCTTCGGGTGCTAAACTGCGGTAATAACATGACAATGTA  
AATGAGTGTGTTATGGAAAGAGGTGGGTAACCTACGTGCCAGCACCAGCGGTAACACGTAG  
ACCTCAAGCGTTATCCGGATTTATTGGGCGTAAAGAGCATGTAGGTGGCTTTGTGCGTCT  
TCTGTTAAAGCCCCGGGCGCTAACCCCGGAAGTGCAGGAGATACGGCAGAACTAGAGGAGG  
TTAGAGGTGCATAGAACGCACGGTGTAGGGGTGAAATCCGTTGATATCGTGCGGAATACC  
AAAGGCGAAGGCATTGCACTGGGACCTTCCTGACACTGAGATGCGAAAGCGTGGGGAGCA  
AAAAGGATTAGAAACCCGAGTAGTCC

>Otu6440

CCAGCCTACGGGGGGCACCAGTCGAGAATCTTCCACAATGGACGAAAGTCTGATGGAGCG  
ACGCCGCGTGATTGATGAAGACCCTCTGGGTGCTAAAAATCTTTTATGAGCTACTAAGTT  
TATTGAAGAGCTCATGAATAAGGGGTTGCTAAACTCGTGCCAGCAGCAGCGGTAATACGA  
GTGCCCCGAGCGTTATCCGGAATCATTGGGCGTAAAGGGTGTGTAGGTGGTCGTGTTAGT  
CTTCCGTTAAACCTGGGGCTTAACCTCAGATATGCGAAAGAGACGGCACGACTGGAGGG  
TGCGAGGGGTCTGTGGAACCTCATGGAGTAGGGGTGAAATCCGTTGATATCATGGGGAACA  
CCAAAAGCGAAGGCAGCAGACTGGCGCATTCCTGACACTGAAACACGAAAGCGTGGGTAG  
CGAATGGGATTAGAAACCCAGTAGTCC

>Otu6445

CCAGCCTATGGGTTGCTGCAGTGGGGAATCTTGCGCAATGGGCGAAAGCCTGACGCAGCC  
ACGCCGCGTGAGTGAAGAAGGCCTTCGGGTGTAAGCTCTGTGCGGGCGGGACGAAAAATG  
GGATGCGTGAATAGCGCATCTTACTGACGGTACCGCCAAAGGAAGCACTGGCTAACTTCG  
TGCCAGCAGCCGCGGTAATACGAGGGGTGCGAGCGTTGCTCGGAATTATTGGGCGTAAAG  
GGTAGGTAGGTGGTCTCATTTGTCTGGGGTGAAGCCTTGAGCTTAACCTCAAGAAGTGCC  
CCAGAAACGGTGAGACTCGAGTCTTGAGAGGGTCTGTGAATTCCCGGTGTAGCGGTGAA  
ATGCGTAGAGATCGGGAGGAACACCAGAGGCGAAGGCGGCGACCTGGACAAGTACTGACA  
CTCAACTACGAAAGCGTGGGGAGCAAACAGGATTAGATACCCAGTAGTCC

>Otu6455

CCAGCCTACGGGATGCAGCAGTGAGGAATATTGCTCAATGGACGAAAGTCTGAAGCAGCA  
ACGCCGCGTGAGGGATGAAGGTGCTCTGCATCGTAAACCTCTGTAGTCGGGGACAAACGT  
GGGGTTACTACCCCATTTGATGGTACCCGAAAAGTAAGGATCGGCTAACTACGTGCCAGCA  
GCCGCGGTAATACGTAGGATCCAAGCGTTGTCCGGATTTACTGGGTGTAAAGGGTGC  
GGCGGACTGGTAAGTCAGAAAGTGAATCTCGGCGCTCAACGCCGAAACGTCTTTTGATAC  
TGCCAGTCTTGAATCGGGGAGAGATCCGTGGGATTCCGAGTGTAGCAGTGAAATGTGTAG  
ATATTGCGAAGAACACCAGAGGCGAAGGCAGCGGATTGGCCCTTGATTGACGCTCAGGCA  
CGAAAGCATGGGGATCAAACAGGATTAGATACCCAGTAGTCC

>Otu6456

CCAGCCTACGGGGTGCACCAGTCGAGGATCTTCGGCAATGGGCGCAAGCCTGACCGAGCG  
ACGCCGCGTGCGGGATGAAGGCCTTCGGGTGTAACCGCCGTCGGAGTGGAGGAAATTC  
CAGGGGGTACTCCCTCTGGATTGACTAATACTCAGAGGAAGGACGGGCTAAGTTTCGTGCC  
AGCAGCCGCGGTAAGACGAACCGTCCAAACGTTATTTCGGAATCACTGGGCTTAAAGGGTG  
CGTAGGCGGCTCAGAAAGTAGGGTGTGAAAGCCCTCGGCTCAGCCGAGGAATTGCGCCCT  
AACTACTGGGCTTGAGGGAGACAGAGGTAAAGCGGAACCTTAGGGTGGAGCGGTGAAATGC  
GTTGATATCCTAAGGAACACCAGGAGCGAAAGCGGCTTACTGGGTCTCTTCTGACGCTGA  
GGCACGAAAGCGTGGGTAGCAAAAAGGATTAGAGACCCAGTAGTCC

>Otu6460

CCAGCCTATGGGAGGCAGCAGTGGGGAATATTGGACAATGGGGGCAACCCTGATCCAGCC  
ATGCCGCGTGAAATGATGAAGGCCTTCGGGTGTAAGTTCTTTTGACGGGGACGATGATG  
ACGGTACCCGTAGAATAAGCTCCGGCTAACTTCGTGCCAGCAGCCGCGGTAATACGAAGG  
GAGCTAGCGTTGTTTCGATTTACTGGGCGTAAAGGGCGCGTAGGCGGTTTCGTAAGTTGG  
AAGTGAAAGCCCTGGGCTCAACCCGGAATTGCTTTCAAACCTACGTTACTCGAATTTGG

TAGAGGTTGGTAGAATTCCCAGTGTAGAGGTGAAATTCGTAGATATTGGGAAGAATACCC  
GTGGCGAAGGCGGCCAACTGGACCAACATTGACGCTGAGGCGCGAAAGCGTGGGTAGCAA  
ACGGGATTAGAGACCCCTGTAGTCC

>Otu6482

CCAGCCTATGGGTCGCAGCAGGCGCGAAACCTTCGCAATGCGCGAAAGCGTGACGAGGTT  
AATCCGAGTGGTTCCTCGCTGAGGGAATCTTTTGTGCGCTCTAAAAAGGCCGCGAATAAG  
GGGAGGGCAAGTCTGGTGTGACCGCCGCGGTAATACCAGCTCCTCGAGTGGTCGGGGCG  
ATTATTGGGCCTAAAGCATCCGTAGCCGGTTCTGTAGGTCTCTGTTAAATCCAACGGCT  
TAACCGTTGGCCCGCAGAGGATACCGCAGGACTAGGAGGCGGGAGAGGCAGACGGTACTC  
TACGTGTAGGGGTAAAATCCTTTGATCCGTAGAAGACCACCAGTGGCGAAGGCGGTCTGC  
CAGAACGCGCTCGACGGTGAGGGATGAAAGCTGGGGGAGCGAACC GGATTAGAAACCCCG  
GTAGTCC

>Otu6483

CCAGCCTACGGGACGCACCAGTAAGGAATCTTCCACAATGGACGAAAGTCTGATGGAGCA  
ACGCCGCGTGACGATGACGGTCTTCGGATTGTAAACTGCTTTTATTTGGGAAGATTATG  
ACGGTACCAAATGAATAAGGACCGGCTAACTACGTGCCAGCAGCCGCGGTAATACGTAGG  
GTCCAAGCGTTATCCGGAATCACTGGGCGTAAAGCGTGCGTAGGTGGCGTATTAAGTGAG  
ATGTGAAATCCCGTGGCTCAACCATGTGGACTGTGTCTCATACTGATATGCTCGAGGATG  
GCAGAGGCAAGTGAATTAGTAGTGTAGCAGTGAATGCGTAGATATTACTAGGAACACC  
AATGGCGAAGGCAGCTTGCTGGGCCACACCTGACACTAAGGCACGAAAGCGTGGGGAGCG  
AACAGGATTAGATACCCTGGTAGTCC

>Otu6484

CCAGCCTACGGGTGGCAGCAGTGGGGAATATTGGACAATGGGGGAAACCCGTATCCAGCC  
ATGCCGCGTGAGTGATGAAGGCCCTAGGGTTGTAAAGCTCTTTCACACGTGAAGATTATG  
ACGGTAACGTGAGGAGAAGCCCCGGCTAACTTCGTGCCAGCAGCCGCGGTAATACGAAGG  
GGGCTAGCGTTGTTCCGAATTACTGGGCGTAAAGCGCACGCAGGCGGCCTAGTTAGTTAG  
GAGTGAAAGCCCTGGGCTTAACCTGGGAATTGCTCTTAATACGGCTAGGCTAGACTTATG  
GAGAGGATAGCGGAATTCCGAGTGTAGAGGTGAAATTCGTAGATATTTCGGAAGAACACCA  
GTGGCGAAGGCGGCTATCTGGCCATTAAGTGACGCTCATGTGCGAAAGCGTGGGGAGCAA  
ACAGGATTAGATACCCCGTAGTCC

>Otu6489

CAGCCTATGGGTTGCTCCAGTGGGGAATCTTGCACAATGGGGGCAACCCTGATGCAGCGA  
CGCCGCGTGAGCGATGAAGCCCTTCGGGGTGTAAAGCTCTTTCGACGGGGACGATGATGA  
CGGTACCCGTAGAAGAAGCCCCGGCTAACTTCGTGCCAGCAGCCGCGGTAATACGAAGGG  
GGCTAGCGTTGCTCGGAATGACTGGGCGTAAAGGGCGGTAGGCGGATGATACAGTCAGA  
TGTGAAATTCTGGGCTCAACCTGGGGGCTGCATTTGATACGTGTTGTCTAGAGTGAGGA  
AGAGGGTTGTGGAATTCCCAGTGTAGAGGTGAAATTCGTAGATATTGGGAAGAACACCGG  
TGCGGAAGGCGGCAACCTGGTCCTTGACTGACGCTGAGGCGCGAAAGCGTGGGGAGCAAA  
CAGGATTAGAGACCCCTGTAGTCC

>Otu6491

CCAGCCTACGGGATGCACCAGCTAAGAATATTCCGCAATGGACGAAAGTCTGACGGAGCG  
ACGCCGCGTGATGACGAAGGCCGAAAGGTTGTAAAGTCTTTTGTGGGGAAGAATAAC  
CATGGGAGGGAATGCCCGTGGGATGACATGAACCGACGAATAAGCACCGGCTAACTCTGT  
GCCAGCAGCCGCGGTAAGACGTAGGGGGCCAGCGTTGTTCCGAATTACTGGGTGTAGAGG  
GTTCTGAGGCGGTGTGGCAAGTTGGGAGTGAAATCTCTGGGCTTAACCCAGAGGCTGCTT  
CCAAAACCTGCTGTGCTTGAGTGTGAGAGAGGCTCGTGGAATTGCAGGTGTAGCGGTGAAA  
TGCGTAGATATCTGCAGGAACACCCGTGGCGAAAGCGGCGAGCTGGATCACAACCTGACGC  
TGAGGAACGAAAGCTAGGGGAGCAAACAGGATTAGATACCCCTGTAGTCC

>Otu6493

CTAGCCTATGGGGGGCAGCAGTGGGGAATTTTGGACAATGGGGGCAACCCCGATCCAGCC  
ATGCCGCGTGAGTGAAGAAGGCCCTTCGGGTGTAAAGCTCTTTCAGCCGGAAAGAAAGCG  
TACGGGTAAATAACCTGTGCGGATGACGGTACCGGAAGAAGAAGCACCGGCTAACTACGT  
GCCAGCAGCCGCGGTAATACGTAGGGTGCAGCGTTAATCGGAATTACTGGGCGTAAAGC  
GTGCGCAGGCGGTTTTGTAAAGACAGATGTGAAATCCCCGGGCTTAACCTGGGAAGTGCAT  
TTGTGACTGCAAGACTAGAGTACGGCAGAGGGGGGTAGAATTCACGTGTAACAGTGAAA  
TGCGTAGATATGTGGAGGAATACCGATGGCGAAGGCAGCCCCCTGGGTGATACTGACGC  
TCATGCACGAAAGCGTGGGGAGCAAACAGGATTAGAGACCCCGTAGTCC

>Otu6494

CCAGCCTACGGGGTGCTCCAGTGGGGAATATTGCACAATGGGCGAAAGCCTGATGCAGCG  
ACGCCGCGTGAGGATGAAGGTTTTTCGGATTGTAACTCCTGTAAAGTGGGAAGAAAGAC  
GCATACCTAATACGTATGCGGGATGACGGTACCCTAGAGAAAGCACCGGCAAACCTTCGT  
GCCAGCAGCCGCGGTAATACGAAGGGTGCAGCGTTATTTCGGAATGACTGGGTGTAAAGA  
GCGTGGAGGCGGTTTTGTTAAGTTAGTTGTTAAATCGCCCGGCTTAACCGGGCAATCGCGA  
TTAAACTGGCAAGCTAGAGTGTGGGAGAGAAAGGTAGAATTCTCGGAGTAGCGGCAAAA  
TGCGTAGATCTCGAGAGGAATACCGGTTGCGAAGGCGGCCTTTTGGCCCACTGACGC  
TGGAGCGCGAAAGCGTGGGGAGCAAACAGGATTAGATAACCCGCGTAGTCC

>Otu6501

CCAGCCTACGGGGGGCTGTCAGTGGGGAATTTTTCGCAATGGGGGAAACCCTGACGCAGCA  
ACGCCGCGTGAGTGATGAAGGCCTTCGGGTCGTAAAGCTCTGTGGGGAGGGACGAATAAG  
TGCTGGCTAATATCCAGCATGATGACGGTACCTCCTTAGCAAGCACCGGCTAACTCTGTG  
CCAGCAGCCGCGGTAAGACAGAGGGTGCAAACGTTGTTTCGGAATCACTGGGCGTAAAGCG  
CGTGTAGGCGGCTACGTAAGTCGGACGTGAAAGCCACGGCTCAACTGTGGAAGTGCCT  
CGAAACTGTGTAGCTTGAGTCTTGAGAGAGGGGCGGAATACTTGGTGTAGAGGTGAAAT  
TCGTAGATATCAGGTAGAACACCAGTGGCGAAGGCGGCCTTCTGGACAATGACTGACGCT  
GAGACGCGAAAGCGTGGGGAGCAAACAGGATTAGAAACCCCGTAGTCC

>Otu6509

CCAGCCTATGGGTGGCACCAGTCGAGAATCTTCCGCAATGGGCGAAAGCCTGACGGAGCG  
ACGCCGCGTGTTGATGAAGTCCTTCGGGACGTAAAAACCTTTTATGATTAAGAAAGTTT  
ATTGATCTGATCATGAATAAGGGGCTCCAACTCTGTGCCAGCAGGAGCGGTAATACAGA  
GGCCCCAAGCGTTGTCCGGAATCACTGGGCGTAAAGGGTGTGTAGGTGGTCTTGTTAGTC  
TCTCGTTAAAGCTCCCGACCTAATCGGGAAAATGCGAGAGATACGGCAAGCCTAGAGGAT  
GCGAGAGGTATGTGGAATTCATGGAGTAGGGGTGAAATCCGTTGATATCGTGGGGAACAC  
CAAAGGCGAAGGCAACATACTGGCGCATTCCTGACACTGAAACACGAAAGCGTGGGTAGC  
GAATGGGATTAGATAACCCGGGTAGTCC

>Otu6511

CCAGCCTACGGGGCGCAGCAGTGGGGAATATTGCGCAATGGGGGCAACCCTGACGCAGCG  
ACGCCATGTGAAGGATGAAGGTCTTAGGATTGTAACTTCTGTAAAGCGGGAATAAGGTC  
TAGTTTACTAGACTTGACGGTACCCTAGAGAAAGTACCGGCTAACTCCGTGCCAGCAGC  
CGCGGTAATACGGAGGGTGCAAGCGTTATTTCGGAATTACTAGGTGTAAAGGGTGCCTAGG  
TGTTTTGTTAAGTCGAATGTTAAATCCACTAGCTTAAGTGTGGCTGCATTGCAAACTG  
ACGGACTTGAGTATAGAAGAGGAAAATGGAATTCCTAGTGTAGCGGTGAAATGCGTAGAT  
ATTAGGAGGAACACCAATAGCGAAAGCAGTTTTCTGGTCTATAACTGACACTGAGGCACG  
AAAGCTAGGGGATCAAACAGGATTAGAAACCCTAGTAGTCC

>Otu6516

CCAGCCTACGGGTCGCACCAGTGGGGAATTTTGGACAATGGGGGCAACCCTGATCCAGCC  
ATGCCGCGTGAGTGAAGAAGGCCTTCGGGTTGTAAAGCTCTTTCGGTGGGAACGAAACGG  
TTACCACTAACACTGGTGACTACTGACGGTACTCACGGAAGAAGCACCGGCTAACTACGT  
GCCAGCAGCCGCGGTAATACGTAGGGTGCAGCGTTAATCGGAATTACTGGGCGTAAAGC  
GTGCGCAGGCGGTGGCTCAAGCCAGGCGTGAAATCCCCGGGCTTAACCTGGGAATGGCGT  
TTGGGACTGGGCTGCTAGAGTGTGGCAGAGGGAGGTGGAATTCACGTGTAGCAGTGAAA  
TGCGTAGAGATGTGGAGGAACACCGATGGCGAAGGCAGCCTCCTGGGCCAGCACTGACGC  
TCATGCACGAAAGCGTGGGGAGCAAACAGGATTAGATAACCCCTGTAGTCC

>Otu6523

CCAGCCTATGGGTTGCAGCAGTCGAGAGGCTTTGTCAATGGGGGAAACCCTGAACAAGCG  
ACGCCGCGTGAGGGATGAAGGCCTTTGGGTTGTAAACCTCTGTTGCACGGGAAGAAATAC  
CGGTGGGTGAATAATCCGCCGGCTTGACGGTACCGTGTGAGGAAGCTCCGGCTAACTCCG  
TGCCAGCAGCCGCGGTAATACGGGGGAGCAAGCGTTGTTTCGGAATCACTGGGCGTAAAG  
GGCGCGTAGGCGGTTTCGGTAAGTGAGATGTGAAAGACTCCGGCTCACCCGGAGAGATGCA  
TCTCATACTGCTGAGCTGGAGTACAGGAGAGGAAACGAGAATTCCAGGTGTAGCGGTGAA  
ATGCGTAGATATCTGGAGGAATACCGGTGGCGAAGGCGCGTTTTCTGGCCTGTTACTGACG  
CTGAGGCGCGATAGCCAGGGGAGCAAACGGGATTAGAGACCCCGTAGTCC

>Otu6527

CAGCCTATGGGTCGCAGCAGTCGAGAGGCTTTGGCAATGGGGGAAACCCTGACCAAGCGA  
CGCCGCGTGAGGATGAAGGCCCTTGGGTTGTAACTCCTTTTGCTGGGGAAGAAGTGCG  
ATCAGGTGAACAATCTGGCCGTTTGACGGTACCCAGCGAATAAGCTCCGGCTAACTCCGT  
GCCAGCAGCCGCGGTAACACGGGGGAGCAAGCGTTGTTTCGGAATCACTGGGCGTAAAG

GCGTGTAGGCGGTCAGGTAAGTGGGATGTGAAATGCCCCGGCTCACCCGGGGACCGGCAT  
CCCAAACCTGCCTGGCTTGAGTATGGGAGAGGATGGAGGAATTCCTGGTGTAGCGGTGAAA  
TGCGTAGATATCAGGAGGAACACCGGTGGCGAAGGCGTCCATCTGGCCCAATACTGACGC  
TGAGGCGCGAAAGCTAGGGGAGCGAACGGGATTAGAAACCCCTCGTAGTCC

>Otu6531

CCAGCCTATGGGTTGCAGCAGGCGCGAAACCTCTGCAATGCGCGAAAGCGCGACAGGGCC  
ACCCCGAGTGCTATCCGAAGAGGGTAGCTTTTCCTTAGTGTAGTAAGCTAGGGGAATAAG  
CGGGGGGCAAGCCTGGTGTGAGCCGCCGCGGTAATACCAGCTCCGCGAGTGGTCGGGACG  
ATTATTGGGCCTAAAGCGTTCGTAGCCGGCCTATCAAGTCTCTGGTTAAATTTCAAGGCT  
TAACCTTGAGCATGCTGGAGATACTGTTAGGCTAGGGGGCGGGAGAGGTTGAGGGTACTT  
CGCGGGTAGGGGCGAAATCCTATAATCCGCGAAGGACCACCAGTGGCGAAGGCGCTCAAC  
TGGAACGCGCCCCGACGGTGAGGGACGAAAGCCAGGGGAGCAAAGGGGATTAGAAACCCGA  
GTAGTCC

>Otu6538

CCAGCCTATGGGATGCAGCAGTGGGGAATATTGGACAATGGGGGAAACCCCTGATCCAGCA  
ATGCCGCGTGTGCGATGAAGGCCTGCGGGTTGTAAAGCACTTTCGTTGGGGAAGAAATTC  
TCAAATATAATACATTTGAGAGCTGACGTTACCCAAAGAAGAAGCACCGGCAAACCTCTGT  
GCCAGCAGCCGCGTAATACAGAGGGTGCAAGCGTTAATCGGAGTTACTGGGCGTAAAGG  
GCGCGTAGGCTGGTATTTAAGTCGATTGTGAAATCCCTGGGCTTAACCTAGGAATTGCAG  
TCGATACTGAATATCTTGAGTATGGTAGAGGAAAGTGGAAATTCCTCGGTGTAGTGGTTAAA  
TACGTAGATATCGAGAAGAACACCGGTGGCGAAGGCGACTTTCCTGGACCAATACTGACGC  
TGAGGCGCGAAAGCGTGGGGAGCAAACAGGATTAGAGACCCCTGTAGTCC

>Otu6539

CCAGCCTATGGGACGCAGCAGTAAGGGATATTGCGCAATGGGCGAAAGCCTGACGGAGCA  
ACGCCGCGTGAGTGACGAAGCCCTTCGGGGTGTAAACTCTTTTCTATGGGAAGAAGATC  
TGACGGTACCATAGGAATAAGCATCGGCTAACTACGTGCCAGCAGCCGCGGTAATACGTA  
GGATGCAAGCGTTGTCCGGATTTATTGGGCGTAAAGAGCGCGTAGGTGGTGTCTTAAAGTT  
AGGCGTGAAATCTCCCGGCTTAACTGGGAGGGGTCTGTCTAAACTGGGACGCTTGAGGGC  
AGCAGAGGAAAAGTGGAAATTCGGGTGTAGTGGTGAAATGCGTAGATATCCGGAGGAACAC  
CAGTGGCGAAGGCGGCTTTCTGGGCTGTTTCTGACGCTGAGGCGCGAAGGCTAGGGTAGC  
GAACGGGATTAGAAACCCCTGTAGTCC

>Otu6540

CCAGCCTACGGGTTGCTCCAGTTGGGAATTTTGCACAATGGGCGAAAGCCTGATGCAGCA  
ACACTGCGTGAAGGATGAAGGTTTTTCGGATCGTAAACTTCTTTTATCTGGGAATAATCTT  
GAAGGTACCAGATGAATAAGCACCGGCTAACTTCGTGCCAGCAGCCGCGGTAACACGTAG  
GAGGCAAGCGTTATCCGGATTTACTGGGCGTAAAGCGCATGCAGGTGGTTTGGTAAGTTG  
GATGTGAAAGCTCCTGGCTCAACTGGGAGAGGTCGTTCAATACTACCAGACTTGAGAGCA  
GTAGAGGGAGGTGGAATTCCTGGTGTAGTGGTGAAATGCGTAGATATCGGGAGGAACACC  
AGTGGCGAAAGCGGCCTCCTGGACTGTTTCTGACACTCATATGCGAAAGCTAGGGTAGCA  
AACGGGATTAGAAACCCCTGTAGTCC

>Otu6541

CCAGCCTATGGGGGGCAGCAGTCGCGAATCTTTTGCAATACACGAAAGTGTGACAAAGCG  
AGCCAAAGTGTTTTCCGCACAGGAAAACCTTTTGCCAGCTGTAAAAAGGCTGGCGAATAAG  
GACTGGGCAAGACTGGTGGCAGCCGCCGCGGTAATCCAGCAGTCCAAGTTGCAGCCAGC  
TTTATTGGGTCTAAAACATCCGTAGCTTGTCTAATAAGTCTCTTGTGAAATCTGGCATCT  
TAAGTGTGAGGCGCGCAAGAGATACTATTGGGCTTGAGACCGGTAGATGTAAGGAGTACA  
TTTAAGGTAGTGGTAAAATACGTTAATCTTAGGTGGACTACAATTGGCGAAGGCACCTT  
ACAAGGACGGATCTGACAGTGAGGGATGAAGGCTAGGGGCGCAAACCGGATTAGATACCC  
TAGTAGTCC

>Otu6544

CCAGCCTATGGGTTGCAGCAGTCGAGAATCTTTCGCAATGGGGGAAACCCCTGACGAAGCG  
ACGCCGCGTGAGCGATGAAGGCTTTCGGATTGTAAAGCTCTGTACAAAGGGACGAAATCT  
TTTTTGGCTAACAGCCAAGAGAGTTGACGGTACCTTGAGAGGAAGCCCCGGCTAACTCTG  
TGCCAGCAGCCGCGGTAATACAGAGGGGGCAAGCGTTGTTTCGGAATTACTGGGTGTAAAG  
GGTGCCTAGGTTGTTGGGTAAGTTAGATGTGAAATCTCAGGGCTTAACCCTGAAATTGCA  
TTTAATACTGCTTGACTAGAAATATGGGAGAGGGAAATGGAATTCTCGGTGTAAGAGTGAA  
ATCTGCAGATATCGAGAGGAACACCAGTAGCGAAGGCGATTTCCTGGCCCAATATTGACA  
CTGAGTGCACGAAAGCTAGGGGAGCAAACGGGATTAGAAACCCCTGTAGTCC

>Otu6547

CCAGCCTATGGGATGCAGCAGTGGGGAATCTTGACAAATGGGGGAAACCCTGATGCAGCG  
ACGCCGCGTGAGCGATGAAGCCCTTCGGGGTGTAAGCTCTGTCTTTGGGGACGATAATG  
ACGGTACCCAAGGAGGAAGCCACGGCTAACTACGTGCCAGCAGCCGCGGTAATACGTAGG  
TGGCAAGCGTTGTCCGGATTTACTGGGCGTAAAGGATGCGTAGGTGGATATTTAAGTCAG  
ATGTGAAATACCCGAGCTTAACTTGGGTGCTGCATTTGAAACTGGATATCTAGAGTGCAG  
GAGAGGTAAGTGAATTCCTAGTGTAGCGGCGAAATGCGTAGAGATTAGGAAGAACACCA  
GTGGCGAAGGCGACTTACTGGACTGTAAGTACACTGAGGCATGAAAGCGTGGGGAGCAA  
ACAGGATTAGAGACCCTCGTAGTCC

>Otu6549

CCAGCCTACGGGGTGCTGCAGCAAGGAATTTTCGGCAATGGGCGCAAGCCTGACCGAGCA  
ACGCCGCGTGTTGGATGACGGCCTTCGGGTGTAAACACCTTTTGGGGGGGAAGACATCG  
ACGGTACCCCCGAACAAGCCCCGGCTAACTCTGTGCCAGCAGCCGCGGTAAGACAGAGG  
GGGCAAGCGTTGTCCGAGTTACTGGGCGTAAAGCGCACGCAGGCGGCCCCGGCACGTGTG  
GGGTGAAAGCTCGGGGCTTAACCCAGAGTCGCCCCGCATACGGCCGGGCTCGAGCCCGG  
GAGAGGTCCCTCGAATTGCCGGTGTAGTGGTGAAATGCGTAGAGATCGGCAGGAAGACCA  
AGGGGGAAGCCAGGGGACTGGCCCCGTGCTGACGCTCAGGTGCGATAGCGTGGGGAGCGA  
ACCGGATTAGAGACCCTGGTAGTCC

>Otu6551

CCAGCCTACGGGGTGCTGCAGCAGTAGGGAATATTGCGCAATGGACGAAAGTCTGACGGAGCG  
ACGCCGCGTGATGACGAAGGCCGAAAGGTTGTAAAGTCCTTTTGTGGGGAAGAATAAC  
CATGGGAGGGAATGCCCGTGGGATGACATGAACCGACGAATAAGCCCCGGCTAACTACGT  
GCCAGCAGCCGCGGTAACACGTAGGGGGCGAGCGTTGTTTCGGAATTACTGGGCGTAAAGG  
GCATGTAGGCTGTTATGTAAGTGTGGATTTAAAGGCGGAGGCTTAACCTCTAGTTTGGTC  
TGCAAACCTGCGTAGCTTGAGTGTAGAAGGGGAAACTGGAATTCGCGGTGTAGGGGTGAAA  
TCTGTAGATATGCGGAAGAATACCTGTGGCGAAGGCGAGTTTCTGGTCTATAACTGACGC  
TGAAATGCGAAAAGTGTGGGTAGCAAACAGGATTAGAAAACCCTCGTAGTCC

>Otu6552

CCAGCCTACGGGGTGGCTGCAGTCGAGGATCTTCGGCAATGGGCGCAAGCCTGACCGAGCG  
ACGCCGCGTGTCGATGAAGGCCCTTCGGGTGTAAAGCACTGTGAGGGGGACGAAGCCG  
CAAGGTTGACCGATCCCTGGAGGAAGCACGGGCTAAGTTCGTGCCAGCAGCCGCGGTAAG  
ACGAACCGTGCAAACGTTGTTTCGGAATCACTGGGCTTAAAGGGCGCGTAGGCGGCTTGCC  
AAGTCAGGGGTGAAATACTTCAGCTTAACTGGAGAAGTGCCTTTGAAACTGGCGGGCTAG  
AGGGAGGTAGGGGTGTGTGGAACCTCTGGTGGAGCGGTGAAATGCGTTGATATCAGAAGG  
AACGCCGCTGGCGAAAGCGACGCACTGGACCTCTTCTGACGCTGAGGCGCGAAAGCTAGG  
GGAGCAAACGGGATTAGATACCCTAGTAGTCC

>Otu6557

CCAGCCTACGGGGTGGCAGCAGTAACGAATCTTCCGCAATGCACGAAAGTGTGACGGAGCG  
ACGCCGCGTGTTGGGACGAAGCCCTTCGGGGTGTAACCCTGTGAGGGATAGGAAAGTTC  
TGATCCATCCCAGAGGAAGGCACGGCTAACTCTGTGCCAGCAGCCGCGGTAAGACAGAGG  
TGCCAAGCGTTAGGCGGAATCACTGGGCTTAAAGCGTGTGTAGGCGGATGCCTAAGTACC  
TTGTGAAATCCCACGGCTTACCCGTGGAACCTGCTGGGTATACTGGGTGCTTTGAGCCAAC  
TAGGGGTGCGCCGAACAAGTGGTGGAGCGGTGAAATGCGTAGATATCACTTGGAACGCCA  
ATGGTGAAAACAGGCGACTGGGGTTGTGCTGACGCTGAGACACGAAAGCCAGGGGAGCGA  
ACGGGATTAGAAACCCTGTAGTCC

>Otu6563

CCAGCCTATGGGGGGCTGCAGGAACGAATATTGGGCAATGGGCGAAAGCCTGACCCAGCG  
ACGCCGCGTGTTGGGAAGAAGTCCTTCGGGATGTAAACCCTGTGAGGGATCACCAAGCAA  
CGGCGTACAATACGCGCCGAAGTTGAGGAGTCCCAAAGGAAGCCACGGCTAACTTCGTGC  
CAGCAGCCGCGGTAAGACGAAGGTGGCAAGCGTTATTCGGAATCATTGGGCTTAAAGCGC  
ACGTAGGCGGCTGTTAAGTGTCTTGTGAAATCCCCCGGCTCAACCGGGGAATGGCTGGG  
CATACTGACGGGCTTGAGGCAGGTAGGGGCAAGTGGAACTCTTGGTGGAGCGGTGGAATG  
CGTAGATATCAAGAGGAACGCCGATGGTGAAGACAACCTTGCTGGGCCTGTCCTGACGCTG  
AGGTGCGAAAGCCAGGGGAGCAAACGGGATTAGAGACCCAGTAGTCA

>Otu6564

CCAGCCTACGGGTTGCTGCAGTGAGGAATATTGGTCAATGGACGGAAGTCTGAACCAGCC  
ATCCCGCGTGCGAGGAAGAATGCCCTATGGGTTGTAAACTGTTTTTCCAGGGGAAGAAAAC  
CTTCGACGAGTCGAAGCTTGACGGTACCTTGGAATAAGCATCGGCTAACTCCGTGCCAG

CAGCCGCGGTAATACGGAGGATGCAAGCGTTATCCGGATTTCATTGGGTTTAAAGGGTGCG  
TAGGCGGACTGATAAGTCAGTGGTGAAAACCTGCAGCTTAACTGTAGACGTGCCATTGAT  
ACTGTTAGACTTGAGTGTGGTCAAGGAAGGCGGAATGTGTAATGTAGCGGTGAAATGCTT  
AGATATTACACAGAACACCTATTGCGAAGGCAGCTTTCTGGGCCATTACTGACGCTGATG  
CACGAAAGCGTGGGGAGCGAACAGGATTAGAAACCCGAGTAGTCC

>Otu6566

CCAGCCTACGGGGCGCACCACTCGAGAATCTTCCGCAATGGACGAAAGTCTGACGGAGCG  
ACGCCGCGTGGAGGATGAAGTTCTTCGGAATGTAACTCCTTTTGCCAGGGAAAAAGTTA  
TTGATTGTACCTGGAGAATAAGAAGTTGCTAACTCGTGCCAGCAGCAGCGGTAATACGA  
GTGCTTCGAGCGTTATCCGGAGTCATTGGGCGTAAAGGGTGCCTAGGCGGCGATGTTAGT  
CTCATGTTAAATCTTTTCGGCTTAACCGAGAGTCTGCATGGGAAACGGCATTGCTTAGAGG  
ACGGAAGAGGTCACCTGGGACTCATGGTGTAGCGGTGAAATGCGTTGATATCATGGGGAAC  
ACCAAAGCGAAGGCAAGTGAAGTGGTCCGCTCCTGACGCTGAAGCACGAAAGCGTGGGTC  
GCGAATGGGATTAGATACCCCCGTAGTCC

>Otu6567

CCAGCCTACGGGGTGCTGCAGTCGAGAATATTCACAATGGGCGAAAGCCTGATGGAGCG  
ACGCCGCGTGCAGGAAGAAGGCCTTCGGGTTGTAACTGCGGTAGCAGGGGAAAAACGCA  
AGTGATGGTACCCTGCGGAAAGAGGTGGGTAACTACGTGCCAGCACCAGCGGTAATACGC  
AGACCTCAAGCGTTATCCGGATTTATTGGGCGTAAAGCGCGTGTAGGGGGTCCTTTGCGT  
CTTTGGTTAAAGCCACCGCCTAACGGTGGAAATCGCCAAAGATACGGAAGGACTTGAGGA  
AGTTAGAGGCACATGGAACGCACGGTGTAGGGGTGAAATCCGTTGATATCGTGCGGAACA  
CCAAAGGCGAAGGCAGTGTGCTGGGACTTTCTTGACCCTGAGACGCGAAAGCGTGGGGAG  
CAAAAAGGATTAGAAACCCCTGTAGTCC

>Otu6574

CCAGCCTACGGGTGGCTGCAGGCGCGAAACCTTTGCCATGCGCGAAAGCGTGACAGGGGA  
ACTCCGAGTGGTAGAAGGTTTTACTTTCTATCTTTTTGTCAATCCAAACAATTGGCAGAA  
TAAGGTCTGGGTAAGGCCAGTGCCAGCCGCCATGTTGGGAGTGTTACACCCCCGACACG  
GTATGCGGTAGTACTGGCAGAACAAGTGGTACCCACGAATATTGGGTCTAAAGAGTCCGT  
AGCGGGCCGACTAAGTCCACTGTGAAATCTGGCGGCTTAACCGTCAGGCGGGCAGTGGAT  
ACTGATCGGCTTGGGAGCGGGGAGGCCGGGAGTACTGGCGGGGTAACGGTAAATGTTG  
TAATCCTGCCAGGACTACCAGTGGCGAAGGCGCCCCGGCCAAAACGCGTCCGACCGTGAGG  
GACGAAGGCTAGGAGAACGAATCGGATTAGATACCCTAGTAGTCC

>Otu6575

CCAGCCTATGGGAGGCAGCAGTGGGGAATATTGGACAATGGGCGCAAGCCTGATCCAGCC  
ATACCGCGTGAGTGATGAAGGCCTTAGGGTTGTAAAGCTCTTTCGCGCACGACGATAATG  
ACGGTAGCGCGAGAAGAAGCCCCGGCTAACTTCGTGCCAGCAGCCGCGGTAATACGAAGG  
GGGCTAGCGTTGTTTCGAATCACTGGGCGTAAAGCGCATGCAGGCGGATCGTTAAGTCGG  
GGGTGAAATCCCGAGGCTCAACCTCGGAACTGCCTTCGATACTGGCGATCTTGAGTCCGG  
GAGAGGTGAGTGGAAGTGCAGTGTAGAGGTGAAATTCGTAGATATTTCGAAGAACACCA  
GTGGCGAAGGCGGCTCACTGGCCCCGTACTGACGCTCAGGTGCGAAAGCGTGGGGAGCAA  
ACAGGATTAGAGACCCGCGTAGTCC

>Otu6581

CCAGCCTACGGGATGCTGCAGTCGAGGATTTTTCTCAATGGGGGAAACCCTGAAGGAGCG  
ACGCCGCGTGGGGGATGAAGTCTTCGGATTGTAAACCCCTGTCATCCGGAACAATGTT  
CCGCACCCAATACGTGCGGAATTGATAGTACTGGAAGAGGAAGCAGTGGCTAACTCTGTG  
CCAGCAGCCGCGGTAATACAGAGACTGCAAGCGTTGCTCGGATTTCATTGGGCGTAAAGGG  
TGCGCAGGCGGTTCGGGTAAGTCGGATGTAAATCCCGCAGCTTAACTGCGGACGGTCATT  
CGAAACTGCCCCGCTCGAGGACTGGAGAGGAGAATGGAATGGTTCGGTGTAGCGGTGAAAT  
GCGTAGAGATCGACCAGAACACCGGTGGCGAAGGCGGGTCTCTGGACAGTTCTTGACGCT  
CAGGCACGAAAGCCAGGGGAGCAAACGGGATTAGATACCCCAGTAGTCC

>Otu6582

CCAGCCTATGGGGGGCTGCAGCCAGGAATATTGGGCAATGGACGCAAGTCTGACCCAGCG  
ACGCCGCGTGGAGGAAGACGGCCTTAGGGTTGTAACTCCTTTTGATAGACCCTTCACGG  
TCTATAGAATAAGCCTCTACTAACTACGTGCCAGAAGTCTCGGTAATACGTAGGAGGCAA  
GCGTTATCCGGATTTCATTGGGCGTAAAGTGTGCGTAGGCGGTTTGATGTGTCTTCTCTTA  
AAGACCGAAGCTTAACTTCGGGAGTGGGGAAAGAACTATCAAACCTCGAGGATTATCAGGG  
ATACTGGAACAGTTAGTGTAGCAGTGAATGCGTTGATATTAACCTGGAACACCAAGGGCG  
AAGGCAAGTATCTGGGATTTTTCTGACGCTGAGGCACGACAGCTAGGGTAGCGAAACGGA



TTAGAGACCCCTCGTAGTCC

>Otu6583

CCAGCCTATGGGTGCGAGCAGGCGGAATACTTTACAATGCACGAAAGTGTGATAGGGGA  
ACTCAAAGTGCTCATACACTGTATGGGCTTTTGCCAACTCAAATTTGGTTGGCGAATAAG  
TGGTGGGAAAGACTGGTGCCAGCCGCCGCGGTAACACCAGCGCCACAAGTGGGAATCGCT  
ATTACTGGGCCTAAAGCGTCCGTAGCAGGTTTTGTAAATTGCTTGTGAAATTGCATAGCT  
CAACTATGCGAATTGCAAGCAACACTGCAAGACTAGAGACCGGGAGATGTTAGAGGTATT  
CAGAGGGGAGCGGTAAAATGCGAGAATCCTCTGAGGACCACCTGTTGCGAAGGCGTCTAA  
CAATAACGGGTCTGACTGTGAGGGTCCAAAGCTAGGGGAGCGAACC GGATTAGATACCC  
CGTAGTCG

>Otu6586

CTAGCCTATGGGTTGCTGTCAGTGAGGAATCTTGCGCAATGGGGGAAACCCTGACGCAGCA  
ACGCCGCGTGAGTGAGGAAGGTCTTCGGATTGTAAAGCTCTGTCAGGTGGAAAGAAGTGC  
ATGGGAGTGAATAGCTACCATGTTTGACGGTACCACCAAAGGAAGCACCGGCTAACTCCG  
TGCCAGCAGCCGCGGTAATACGGGGGGTGCAAGCGTTGTTGGAATCATTGGGCGTAAAG  
AGCGTGTAGGCGGCGTAATAAGTCAGATGTGAAATCCCCGGGCTCAACCCGGGAAGTGCA  
TTTGAAACTGTTACGCTTGAGTAGGGGAGAGGGAAGTGAATTCCTGGTGTAGAGGTGAA  
ATTCGTAGATATCAGGAGGAACACCGGTGGCGAAGGCGACTTCCTGGCCCTATACTGACG  
CTGAGACGCGAGAGCGTGGGTAGCAAACAGGATTAGATACCCTAGTAGTCC

>Otu6592

CCAGCCTACGGGTGGCACCAGTGGGGAATATTGCGCAATGGGCGAAAGCCTGATGGAGCG  
ACGTCGCGTGACTGATGAAGTTCTTAGGGATGTAAAGGTCTTTTATGAGGGAGAAAGGCG  
TCGCAAGACGTTTGATAGTACCTCATGAATAAGGGGTTGCTAAACTCGTGCCAGCAGCAG  
CGGTAATACGAGTGCCCCGAGCGTTATCCGGAATTATTGGGCGTAAAGGGTATGTAGGTG  
GTACTGTTAGTCTTTCGTTAAAGCTCCCGGCTTAACCGGGAAAAGGCGAAAGAAACGGCA  
GCACTTGGAGAGTGCGAGAGGTGTATGGAACCTCATGGTGTAGGGGTGAAATCCGTTAATA  
TCATGGGGAACACCAAAGGCGAAGGCAATACACTGGCGCATTTCTGACACTGAAATACGA  
AAGCGTGGGGAGCGAATGGGATTAGATACCCCTGTAGTCC

>Otu6596

CCAGCCTATGGGGGGCTGTCAGTGGGGAATATTGGACAATGGGGGAAACCCTGATCCAGCG  
ACGCCGCGTGCTGTGAAGAAGGCCTGCGGGTTGTAAAGCACTTTTAGTGGGGATGAAACGC  
TCAGACCTAACACGTCTGGGAATTGACCTAACCCAAAGAAAAAGCACCGGCTAACTCTGT  
GCCAGCAGCCGCGGTAATACAGAGGGTGCAAGCGTTAATCGGAATTACTGGGCGTAAAGC  
GTGCGTAGTCGGTTATTTAAGTCGGATGTGAAATCCCCGGGCTCAACCTGGGAATTGCAT  
TCGATACTGGGTAGCTAGAGTTCGGCAGAGGGAAGTGAATTTCCGGTGTAGCGGTGAAA  
TGCGTAGATATCGGAAGGAACATCAGTGGCGGAAGCGACTTCCTGGACCAGAAGTACGA  
TCAGGCACGAAAGCGTGGGGAGCAAACAGGATTAGATACCCGCGTAGTCC

>Otu6597

CCAGCCTACGGGATGCAGCAGTGGGGAATATTGGACAATGGGCGCAAGCCTGATCCAGCA  
ATGCCGCGTGCTGTGAAGAAGGCCTGCGGGTTGTAAAGCACTTTAAGCAGGAAAGAAGGGG  
TGGGGGCGAATATCCTCCGCCATTGACGTTACCTGCAGAATAAGCACCGGCTAACTCCGT  
GCCAGCAGCCGCGGTAATACGGAGGGTGCGAGCGTTAATCGGAATTACTGGGCGTAAAGC  
GCGCGTAGGCGGTTTCGATCAGTCTGAGGTGAAAGCCCTGGGCTCAACCTGGGAACGGCCT  
TGGAACCTGTGCGAGCTAGAGTGTGGGAGAGGGGCGTGGAATTTCCGGTGTAGCAGTGAAA  
TGCGTAGAGATCGGAAGGAACACAGTGGCGAAGGCGGCGCCCTGGCCCAACACTGACGC  
TGAGGTGCGAAAGCGTGGGGAGCAAACAGGATTAGAAACCCGAGTAGTCC

>Otu6605

CCAGCCTACGGGACGCACCAGTCGGGAATTTTGGACAATGGGGGAACCCTGATCCAGCGA  
CGCCGCGTGTCAGGATGACATCCTTCGGGATGTAAACTGCTGTTCGGGCGGGAAGAACGATC  
CCGTTCTAATAACAATCGGGAAGTGACGGTACCGCCGAAGGAAGCACCGGCTAACTCTGT  
GCCAGCAGCCGCGGTAAGACAGAGGGTGCAAGCGTTGTTTCGGATTGACTGGGCGTAAAGG  
GCGTGTGGGTGGTCAGGTAAGTTCGATGTGAAATCATCATCGCTTAACGAGATGTCCGCA  
TCGAAAACCTGTCTGACTTGAGTATCGGAGAGGATAACGGAATTCCTGGTGTAGCAGGTGGA  
ATGTGTAGAGATCAGGAGGAACACCTGTGGCGAAGGCGGTTATCTGGCCGAATACTGACA  
CTGAGGCGCGAAAGCTAGGGGAGCAAACCGGATTAGATACCCCGTAGTCC

>Otu6608

CCAGCCTATGGGGTGCTCCAGTCGAGAATCTTTCGCAATGGGCGAAAGCCTGACGAAGCG  
ACGCCGTGTGAGCGAAGAAGGCCTTCGGGTTGTAAAGCTCTTTCGCTCGGGAACAAAGAA

GTTGACTGAATAAGTCATTACTTGAGTGTACCGGGTAAAGAAGCACCGGCTAACTCCGTG  
CCAGCAGCTGCGGTAATACGGAGGGTGCAAGCATTAAATCGGAATCATTGGGCGTACAGGG  
TGCGTAGGTGGGTAATTAAGTCAGACGTGAAAGCCTGGGGCTCAACCCAGAAATGGCGTT  
TGATACTGATTACCTTGAGGATAAGTGGGGAAAGTGAATTCGCAAGTAGCGGTGAAAT  
GCGTAGATATGCGGAGGAACACCTGTGGTGAAGACGACTTCTAACTTATTCCTGACACT  
GAGGCACGAAAGCGAGGGGAGCAAACAGGATTAGAAACCCGAGTAGTCC

>Otu6609

CCAGACCTATGGGGGGCTCCAGTGAGGAATATTGGTCAATGGACGCAAGTCTGAACCAGC  
CATGCCGCGTGACAGGAAGACGGCCCTATGGGTGTAAACTGCTTTTGTAAAGGAATAACC  
GCTCGTACGTGTACGAGTCTGAATGTACCTTACGAATAAGCATCGGCTAACTCCGTGCCA  
GCAGCCGCGGTAATACGGAGGATGCAAGCGTTATCCGGATTTATTGGGTTTAAAGGGTCC  
GCAGGCGGTATATTAAGTCAGTGGTGAATCCGGCAGCTCAACTGTCGCACTGCCATTGA  
TACTGGTATACTTGAGTGTAAATTGAAGTAGGCGGAATAAGTCATGTAGCGGTGAAATGCA  
TAGATATGACTTAGAACACCAATTGCGAAGGCAGCTTACTAAGTTACAACCTGACGCTGAG  
GGACGAAAGCGTGGGTAGCAAACAGGATTAGAAACCCCGTAGTCT

>Otu6610

CCAGCCTATGGGGTGCTGCAGTCGAGGATCTTTTGCAATGCCCGCAAGGGTGACAATGCG  
ACGCCGCGTGAGCGATGAAGGCCTTCGGGTGTAAAGCTCTGTCAGCATGGATGAAGTCT  
TGAGAATTAATAACTCTCAAGATTGACGGTACATGCAGAGGAAGCCACGGCTAACTCTGT  
GCCAGCAGCCGCGGTAATACAGAGGTGGCAAGCGTTGTTTCGGATTTACTGGGTGTAAAGG  
TCATGTAGGCGTTTTGTTAAGTCGGGCGTGAAATCCTATGGCTCAACCATAGAACTGCGC  
TCGATACTGGCAGGATTGAGTACGGGAGAGGTAAGCGGAATTCAGAAGTAAGGGTGAAA  
TCTGTAGATATCTGGAAGAACACCATTAGCGAAGGCGGCTTACTGGTCCGATACTGACGC  
TGAAATGAGAAAGCTAGGGGAGCAAACAGGATTAGATAACCTTGTAGTCC

>Otu6611

CCAGCCTATGGGTCGCTCCAGTCGAGAATTTTTCTCAATGGGCGAAAGCTTGAAGGAGCG  
ACGCCGCGTGGGGGATGAAGGGCTTCGGCCTGTAAACCCCTGTCATTTGCGAACAAACCT  
TTTCATTGAACAGGTGGAAAGTTGATAGTAGCGAAAGAGGAAGGGACGGCTAACTCTGTG  
CCAGCAGCCGCGGTAATACAGAGGTCCCAAGCGTTGTTTCGGATTCACTGGGCGTAAAGGG  
TGCGTAGGTGGTTCGGATAAGTTTCGATGTGAAATCTCCGGGCTTAACTCGGAAATGGCATT  
GAATACTATTTCGGCTAGAGGGTCGGAGGGGAGACTGGAATTCTCGGTGTTGCAGTGAAAT  
GCGTAGATATCGAGAGGAACACCAGTGGCGAAGGCGAGTCTCTGGACGACTCCTGACACT  
GAGGCACGAAAGCTAGGGGAGCAAACAGGATTAGAAACCCGTGTAGTCC

>Otu6613

CCAGCCTATGGGTGGCACCAGTAACGAATATTGGGCAATGGGCGAAAGCCTGACCCAGCG  
ACGCCGCGTGTGGGAGGAAGTCCTTCGGGACGTAAACCACTGTCAGGGGGAAGAAAGTCT  
ATCGCAAGGTAGATTGATCTAACCCAGAGGAAGTCACGGCTAACTCTGTGCCAGCAGCCG  
CGGTAAGACAGAGGTGGCTAGCGTTGTTTCGGTGTCACTGGGCTTAAAGGGTGTGTAGGCG  
GCTAGACAAGCGGTTGTGAAATCCCTCGGCTTAACCGAGGAATTGCTTCGCGTACTATC  
TGGCTTGAGGCAGGTATGGGTGCGGGGAACGTGTTGGTGGAGCGGTGGAATGCGTAGATAT  
CAACAGGAACGCCGTTGGTGAAGACGCTGCACTGGACCTGTCCTGACGCTGAGACACGAA  
AGCGAGGGGACCGAACGGGATTAGAGACCCGCGTAGTCC

>Otu6615

CCAGCCTATGGGGGGCTGCAGTCGAGAATTTTTCAATGGGCGCAACCCTGATCCAGCA  
ATGCCGCGTGGGTGAAGAAGGCCTGCGGGTTGTAAAGCCCTTTAAGTGGGAGGAACGGC  
GGGATGCAACAGCGTCCGGTTATGACGTTACCCACAGAATAAGCACCGGCTAACTCCGT  
GCCAGCAGCCGCGGTAATACGGGGGGTGCAAGCGTTAATCGGAATTACTGGGCGTAAAGC  
GTGCGTAGGCGGTTGGGTGAGTCAGCCGTGAAAGCCCTGGGCTTAACCTGGGAACGGCGG  
TTGAGACGGCCCGACTGGAGTGGGCTAGAGGATTGTGGAATTCCTGGGTGTAGCGGTGAAA  
TGCGTAGAGATCGGGAGGAACACCGATGGCGAAGGCAGCAGTCTGGGGCCACACTGACGC  
TGAGGCACGAAAGCGTGGGGAGCAAACAGGATTAGAAACCCCTCGTAGTCC

>Otu6617

CCAGCCTACGGGATGCAGCAGTGAGGAATTTTGCGCAATGGCCGCAAGGCTGACGCAGCA  
ACGCCGCGTGGGTGAAGAAGGCCTTCGGGTGCTAAAGCCCTGTCAGGTGGGAAGAATGAT  
TCGGTTATGAATAATGGCCGAATGTGACGGTACCACCAGAGGAAGCACCGGCTAACTCCG  
TGCCAGCAGCCGCGGTAATACGGAGGGTGCAAGCGTTATTCGGAATTACTGGGCGTAAAG  
CGCGTGCAGGCGGGCGAGCAAGTCTGATGTGAAAGCCCCGGGCTTAACCTGGGAAGTGCA  
TTGGAACCTGGGAGACTTGAATACGGGAGAGGGCAGTGAATTCCTGGTGTAGGAGTGAA

ATCCGTAGATATCAGGAGGAACACCGGTGGCGAAGGCGGCTGCCTGGACCGATATTGACG  
CTGAGACGCGAAAGCGTGGGGAGCAAACAGGATTAGAAACCCCCGTAGTCC  
>Otu6620  
CCAGCCTACGGGTCGCACCAGTGGGGAATTTTGC GCAATGGGCGAAAGCCTGACGCAGCA  
ACGCCGCGTGGAGGATGAAGGTGCTCTGCATCGTAAACTCCTGTCGGCCGGGAAGAAAGG  
GCAGCGCAGTAACTGGCGATGTCGTTGACTGTACCGGCAAAGGAAGCCCCGGCTAACTCC  
GTGCCAGCAGCCGCGGTAATACGGAGGGGGCAAGCGTTACTCGGAATTATTGGGCGTAAA  
GGGCGCGTAGGCGGTCTGTGCGTCGGAGGTGAAATCCCCGGGCTTAACCCGGGAGCTGC  
CTCCGATACGGCATGACTTGAGTCCGGGAGAGGGGAGCAGAATCCCAGTGTAGCGGTGA  
AATGCGTAGATATTGGGAGGAATACCAGTGGCGAAGGCGGCTCCCTGGACCGGTACTGAC  
GCTGAGGCGCGAAAGCGTGGGTAGCAAACAGGATTAGATACCCCCGTAGTCC  
>Otu6627  
CCAGCCTATGGGAGGCTGCAGTCGAGGATCTTCGGCAATGGGGGCAACCCTGACCGAGCG  
ACGCCGCGTGC GGGATGAAGGCCTTCGGGTTGTAAACCGCTGTCAGAGGGGAGGAAATGC  
TGTGGGGTTCTCCCTGCAGTTTGACCTATCCTCAGAGGAAGTACGGGCTAAGTTCGTGCC  
AGCAGCCGCGGTAAGACGAACCGTACGAACGTTATTTCGGAATTACTGGGCTTAAAGGGTG  
CGTAGGCGGCCCCGGAAGTTGGGTGTGAAATCCCTCGGCTCAACCGAGGAAGTGC C CCA  
AACTGCCGGGCTTGAGGGAGATAGAGGTGAACGGAAGTTAGGGTGGAGCGGTGAAATGC  
GTTGATATCCTAAGGAACACCAGTAGCGAAAGCGGTTCACTGGGTCTCTTCTGACGCTGA  
GGCACGAAAGCTAGGGGAGCGAACGGGATTAGAAACCCCCGTAGTCC  
>Otu6629  
CCAGCCTATGGGGGGCACCAGTTAGGGAACTTTTACAATGCGCGCAAGCGTGATAAAGTA  
AGCCAGAGTGTTATTCATAAAATTTGAATAACTTTTGTTCGTTGCAAAAAGACGGATGAA  
TAAGGAGTGGGCAAGATCGGTGCCAGCCGCCGCGGTAATCCCGACGCTCCGAGTCGCAGC  
CACAAATTATTGGGTCTAAACATTTCGTAGCTTGTTTGTTAAGTTCTTTGTGAAATCTTAC  
ATCTTAAGTGTAAGGCGTGCAAGGAATACTGGCAAACCTTGAGACCGGAAGAAGCAAGAAG  
TATGCTCGAGGTAGTGGTAAAATATGTTAATCTCGAGCAGACTAACAACAGCGAAGGCAT  
CTTGCTAGTACGGATCTGACAGTGAGGAATGAAGGCTAGGGTCGCGAAGCGGATTAGATA  
CCCGTGTAGTCC  
>Otu6631  
CCAGCCTATGGGAGGCTGCAGTCGAGAATTTTTCTCAATGGGCGAAAGCTTGAAGGAGCG  
ACGCCGCGTGGGGGATGAAGGGCTTCGGCCTGTAAACCCCTGTCATTTGCGAACAAACCT  
GCCATTTAATACATGGGCGGCTGATAGTAGCGAAAGAGGAAGGGACGGCTAACTCTGTG  
CCAGCAGCCGCGGTAATACAGAGGTCCCAAGCGTTGTTTCGATTCACTGGGCGTAAAGGG  
TGCGTAGGTGGTGATGTAAGTTCGATGTGAAATCTCCGGGCTTAACCCGGAAGGCATA  
GGAGACTATATCGCTGGAGGGTCGGAGGGGAGACTGGAATTCTCGGTGTAGCAGTGAAAT  
GCGTAGATATCGAGAGGAACACCAGTGGCGAAAGCGAGTCTCTGGACGACTCCTGACACT  
GAGGCACGAAAGCTAGGGGATCAAACAGGATTAGAAACCCCTCGTAGTCC  
>Otu6635  
CCAGCCTATGGGTGGCTGCAGTCGAGAATATTTCCCAATGGCCGAAAGGCTGAGGGAGCG  
ACGCCGCGTGATGAAGACGCCCTTCGGGGTGTAATAACTTTTAAACCGGGACGAAACAA  
TGACGGTACCGGTTGAATAAGGGGCTGCTAAACTCGTGCCAGCAGCAGCGGTAATACGAG  
TGCCCCAAGCGTTATCCGGATTTATTGGGCGTAAAGCGTACGTAGGTGGTTTTATCGCATC  
TCTGTTTAAATCCCGAGGCTCAACCTCGGGGCCGCGGGAGAGATGGCTAAACTAGAGACA  
GGGAGAGGCAAGTGGAATTGCTGGTGAGGGGTTAAATCCGTTAATATCAGCAAGAACAC  
CCAATGTGAAGACAGCTTGCTGGAAGTCTTGACACTAAGGTACGAAAGCGTGGGGAGC  
GAATGGGATTAGATAACCTCGTAGTCC  
>Otu6636  
CCAGCCTATGGGGGGCTCCAGCAACGAGTCTTCCCAATGCCGGAACGGTGAGGGAGCG  
ACGCCGCGTGAAGGACGAAGTTCTTCGGAATGTAAACTTCTGTAAGGGACATGAAAGGTT  
AGCGCCTAACACGCGCAAAATTTGATCTGTCCCCTAAAAGGGGCGGCTAACTCTGTGCCA  
GCAGCCGCGGTAATACAGAGGCCCAAGCGTTACTGAGAATCACTGGGTTTAAAGGGTGC  
GTAGGTGGTCCGTTAAGTCCGTTGTGAAAGCCCTGGGCTCAACCCAGGAAGTCTTCGGA  
TACTGGCGGACTTGAGGCCGGTAGGGGTCACTGGAAGTACGGGTGGAGCGGTGAAATGCG  
TAGATATCGTCAAGAACGCCAATGGTGAAGACAGGTGACTGGGCCGGTTCTGACACTGAG  
GCACGAAAGCGTGGGGAGCAAACAGGATTAGATAACCCGCGTAGTCC  
>Otu6637  
CCAGCCTACGGGACGCTCCAGGCGCGAAAACCTTCACAATGCACGAAAGTGTGATGAGGGA

ATCCGAAGTGCTTACAGTTTACTGTAGGCTTTTGCCAAAAGTAAGGATTTTGGCGAATAA  
GTGGTGGGCAAGACTGGTGCCAGCCGCCGCGGTAACACCAGCGCCACAAGTGGCAACCGT  
ATTTATTTGGCCTAAAGCGTTCGTAGCCGGTTGGGTAAATCTTCTGTGAAATTGTTTCAGC  
TTAACTGCACAACGTGCAGAGGACACTGCTCAGCTAGGGGCCGGGAGGGGTATGGGGTAT  
TCTTGAGGGAGCGGTAAAATGCTATAATCTCTTGAAGACCACCTGTGGCGAAGGCGCCAT  
ACCAGCACGGATCCGACGGTGAGGGACGAAAGCCAGGGGAGCAATCCGGATTAGAGACCC  
TAGTAGTCC

>Otu6638

CCAGCCTATGGGAGGCTGCAGTCGAGGATCTTTAGCAATGGACGAAAGTCTGACTATGCG  
GCGCCGCGTGAGGGATGAAGGTTTTTCGGATCGTAAACCTCTTTCGATAGGGAAGAAAGCC  
TATGCTCTAACATAGTATAGGTGTGACGGTACCTAGAGAAGAAGCCACGGCCAACCTCCGT  
GCCAGCAGCCGCGTAATACGGGGGTGGCGAGCGTTACTCGGATTTATTGGGTGTAAAGG  
GCAGGTAGGCGTTCCTTCAAGTTAGAAGTGAAATCCTGTGGCTCAACCACAGAAGTCTT  
CTAAAAGTGTAGGAATTGAGACTGACAGAGGAGAGCGGAATTCCTGGTGTAAAGGTGAAA  
TCTGTAGATATCGGGAGGAACACCAGTGGCGAAAGCGGCTCTCTGGGTTAGCTCTGACGC  
TGAGCTGCGAAAGCTAGGGTAGCAAACAGGATTAGAAACCCGTGTAGTCC

>Otu6641

CCAGCCTATGGGGCGCAGCAGTGAGGAATGTTGCACAATGGGGGAAACCCCTGATGCAGCA  
ACGCCGCGTGGGTGATGAAGGCCTTCGGGTCGTAAACCCCTTTTCTGGGGACGAGCAAG  
GACGGTACCCAGGAATAAGTCCCGGCTAACTACGTGCCAGCAGCCGCGGTAAACCGTAG  
GGGGCAGCGTTATCCGGAATTACTGGGCGTAAAGCGCGTGACAGGCGGCTTGATAGGTTG  
GACGTGAAAGCTCCTGGCTCAACTGGGAGAGGCCGTTCAATACCGTCAGGCTTGAGGACG  
GAAGAGGGGAGTGGAATTCCCGGTGTAGTGGTGAATGCGTAGATATCGGGAGGAACACC  
TGTGGCGAAAGCGGCTCCCTGGTCCGTATCTGACGCTCAGACGCGAAAGCGTGGGGAGCA  
AACGGGATTAGAAACCCCGGTAGTCC

>Otu6642

CCAGCCTATGGGAGGCTCCAGGGACGAATCCTTCGCAATGCGCGCAAGCGTGACGAGGGG  
ACTCCGAGTGATGGACCACGCGTTCATCTTTTCGCCAGACCAAACATCTGGCGGAATAAG  
GGCTGGGCAATATCGGTGCCAGCCGCCGCGGTAACACCGAAAGCTCAAGTGGTGTCCACG  
AATATTGGGCCTAAAGAGTCCGTAGCTGGCTTGTTAAGTTCTCTGTGAAATCTTCCAGCT  
TAACTGGAAGGCGTGACAGGGGTACTGACAGGCATGGGAGTGGGGGAAGTCAGGAGTACT  
CTCGGGGTAGAGGTAAAATTCTGTAATCCTGTGAGGACTACCAGTGGCGAAGGCGCCTGA  
CTAAAACATGTCCGGCAGTGAGGGACGAAGGCTAGGAGAACGAATCGGATTAGATACCCG  
CGTAGTCC

>Otu6645

CCAGCCTATGGGTGCGCAGCAGTCGAGAATCTTCCGCAATGGACGAAAGTCTGACGGAGCG  
ACGCCGCGTGACAGGATGAAGTGCTTCGGCATGTAAACTGCTTTTGCCAGGGAAAAAGTTA  
TTGATTGTACCTGGAGAATAAGAGGTTGCTAAACTCGTGCCAGCAGCAGCGGTAATACGA  
GTGCCTCGAGCGTTATCCGGAATCATTGGGCGTAAAGGGTGTGTAGGCGGTTTCGTTAGT  
CTTCCGTTAAATTCTTCGGCTCAACCGGGGGCATGCGGAGGAAACGGCGAAACTTAGAGG  
ACGGAAGAGGTTTCTGGAACCTCATGGTGTAGCGGTGAAATGCGTTGATATCATGGGGAAC  
ACCGAAAGCGAAGGCAAGAAACTGGTCCGCTCCTGACGCTGAAACACGAAAGCGTGGGTC  
GCGAATGGGATTAGAAACCCCCGTAGTCC

>Otu6650

CCAGCCTACGGGTGGCACCAGTAGGGAATATTCCGCAATGGGCGAAAGCCTGACGGAGCG  
ACGCCGCGTGAGAGGATGAAGGCCTTCGGGTCGTAAACTCCTGTCAGTGGTGAAGAATGCC  
ACGCTTCGGCGTGACTGACCTAAGCCGCAGAGGAAGCCCCGGCTAACTCCGTGCCAGCA  
GCCGCGGTAAACGGAGAGGGCGAGCGTTGCTCGGAATCACTGGGCGTAAAGCGCACGTA  
GGCGGTTTGACAAGTTGGTTGTGAAATCTCATGGCTCACCCATGGAACGGCTTCCAATAC  
TGTCGAAGTGGAGTGCTGGAGGGGAGAGTGGAATCCTTGGTGGAGCGGTGAAATGCGTAG  
ATATCAAGAGGAACGCCGGTGGCGAAGGCGACTCTCTGGACAGCAACTGACGCTGAGTGT  
GCGAAAGCTAGGGGAGCAGACGGGATTAGAAACCCAGTAGTCC

>Otu6658

CCAGCCTACGGGTGGCAGCAGCTAAGAATCTTCCGCAATGGGCGCAAGCCTGACGGAGCG  
ACGCCGCGTGAGATGAAGAAGGCCGCAAGGTTGTAAATCCTTTTGTCAACGAAGAATAAG  
GGTGCAGAGGAAATGCGCATCTGATGACGTTAGTTGACGAATAAGCCCCGGCTAATTACGT  
GCCAGCAGCCGCGGTAATACGTATGGGGCGAGCGTTGTTTCGGAATTATTGGGCGTAAAGG  
CGGTGTAGGCGGCTTGGCAAGCTTGGTGTGAAATCCCACGGCTTAACCGTGGATGTGCGC

TGAGAACTGCCAGACTTGAGTCCTCGGGAGGAAGATGGAATTCCTGGTGTAGGGGTGAAA  
TCTGTAGATATCAGGAAGAACACCGATGGCGAAGGCAATCTTCTATCGAGAGACTGACGC  
TGAGGCGCGAAAGCGTGGGGAGCAAACAGGATTAGAAACCCTTGTAGTCC

>Otu6660

CCAGCCTACGGGTTCGAGCAGGCGCGAAACCTTTGCCATGCGCGAAAGCGTGACAGGGGA  
ACTCCGAGTGGTAAGAGGATTTATCTTCTTATCTTTTGGCCGATCCAAACAATCGGCAGA  
ATAAGGTCTGGGTAAAGACCAGTGCCAGCCGCCATGCTATGTTAACGCATCAGCATTGGCA  
CGGTACGCGGTAAATACTGGCAGAACAAAGTGGTATCCACGAATATTGGGTCTAAAGAGTCC  
GTAGCGGGCTGGTTAAGTCCACTGTGAAATCTAACGGCTCAACCGTTAGGCGTGCAGCGG  
ATACTGATCGGCTTGGGAGTGGGGGAGGCCGGGAGTACTTGCGGGGTAGAGGTAAATTC  
TGTAATCCTGCAAGGACTACCAGTGGCGAAGGCGCCCGGCCAAAACACGTCCGACCGTGA  
GGGACGAAGGCTAGGAGAACGAATCGGATTAGATACCCCCGTAGTCC

>Otu6661

CCAGCCTATGGGTCGCTGCAGTCGAGAATCTTCCACAATGGACGAAAGTCTGATGGAGCG  
ACGCCGCGTGATTGATGAAGTCCCTTTGGGACGTAAAGATCTTTTATGAGGGGAGAAAGTT  
TATTGACTGTACCTCATGAATAAGAGGCTCCTAATCTCGTGCCAGCAGGAGCGGTAATAC  
GAGAGCCTCGAGCGTTATCCGGAATTATTGGGCGTAAAGGGTGTGTAGGTTGTTCTGTTA  
GTCTTTTGTCAAATCCCCGTGCTCAACGCGGGGTACGCTAGAGATACGGCAGGACTAAGA  
AAGTGCGAAAGGTGTACGGAACCTCATGGTGTAGGGGTGAAATCCGTTGATATCATGGGGA  
ACACCAAAGCGAAAGCAGTACACTGGCGCATATTTGACACTGAAACACGAAAGCGTGGG  
GAGCAAACAGGATTAGAGACCCTAGTAGTCC

>Otu6665

CCAGCCTACGGGTCGCGAGCAGTCGAGAATCATTCACAATGGGGGAAACCCTGATGGTGCA  
ACGCCGCGTGAGGATGAAGGTCCTTGGATTGTAAACTCCTGTCATCTGGGAGTAAGACC  
TGACGGTGAATAGCCGGCAGGGTTGATAGTACCAGAAGAGGAAGGGACGGCTAACTTCGT  
GCCAGCAGCCGCGTAATACGAAGGTCCCAAGCGTTGTTTCGGAATCACTGGGCGTAAAGG  
GTGCGTAGGCGGCGTGGTAAGTCAGATGTGAAATCCCGGGGCTCAACCCCGGAACTGCAT  
CCAATACTGCCATGCTTGAGGATTGGAGAGGAGACTGGAATTCCTCGGTGTAGCAGTGAAA  
TGCGTAGAGATCGAGAGGAACACTCGTGGCGAAGGCGAGTCTCTGGACAATTCCTGACGC  
TGAGGCACGAAGGCCAGGGGAGCGAAAGGGATTAGAAACCCTTGTAGTCC

>Otu6675

CCAGCCTATGGGTTGCTGCAGGAGGGAGTATTGGTAATCTACGAAAGTGGGAACCAGCAA  
CGCCGCGTGAGCGATGACGGCCTTCGGGTTGTAAAGCTCTTTTTGCCGGGACGAGGAAGG  
ACGGTACCGGTAGAATAAGCCTCGGCTAACTACGTGCCAGCAGCCGCGGTAAAACGTAGG  
AGGCGAGCGTTATCCGGATTTACTGGGTGTAAAGCGCATGCAGGCGGTTTACTAAGTTGG  
GTGTGAAAGCTCCTGGCCCAACTGGGAGAGGTCGCTCAAGACTGGTAGACTAGAGAGTGG  
TAAGGGAAGGTGGAATTCGGGTGTAGTGGTGAAATGCGTAGATATCCGGAGGAACACCA  
GTGGCGAAGGCGGCCTTCTGGACCACGACTGACGCTCAGATGCGAAAGCTAGGGTAGCAA  
ACGGGATTAGATACCCCAGTAGTCC

>Otu6679

CCAGCCTACGGGTGGCACCACTCGGGAAACTTCTGCAATGCGCGCAAGCGTGACAGAGCA  
AACCAGAGTGCCTTTCCATATTGGAAATGCTTTTGTGAGATGTAAAAAGTCTTACGAATA  
AGGGCCGGGCAAGACTGGTGCCAGCCGCCGCGGTAATCCCAGCGGTCCGAGTCGCAGCCA  
CAATTATTGGGTCTAAAACATCCGTAGCTCGCTTTGTAAGTCTTTTGTGAAATCGGGACT  
CTTAAGGTTCCGGCGAGCAAAAGATACTGCTTAGCTAGAGACCGGTAGACGTAACGAGTA  
CGAACAGGGTAGCGGTAAAATGTGTTGATCCTATTCGGACTAACAACAGCGAAGGCACGT  
TACGAGCACGGTTCTGACAGTGAGGGATGAAGGCTAGGGGCGCAAAGTGGAATTAGAAACC  
CGAGTAGTCC

>Otu6680

CCAGCCTATGGGTTGCTGCAGTGGGGAATTTTGGACAATGGGGGAAACCCTGATCCAGCA  
ACGCCGCGTGAGCGATGAGGGTCTTCGGATCGTAAAGCTCTGTAAAGTGGAACGATGGGT  
TCTGAGGCTAATATCCTTAGGATTTGACGGTACCACTGGAGGAAGTCACGGCTAACTACG  
TGCCAGCAGCCGCGGTAATACGTAGGTGGCAAGCATTGTTTCGGATTTACTAGGCGTAAAG  
GGAGCGTAGGTGGCTATGTAAGTTGTAAGTGAAATTCACGGCTTAACCGTGGAACGGCT  
TGCAAAACTGCATGGCTTGAGTATAGGAGAGGGAAATGGAATTCCTAGTGTAGCGGTGAA  
ATGCGTAGATATTAGGAAGAACACCTGTGGCGAAGGCGATTTCCTGGCCTAACACTGACG  
CTGAGGCTCGAAAGCTAGGGGAGCAAACAGGATTAGAAACCCGCGTAGTCC

>Otu6685

CCAGCCTACGGGTTCGAGCAGTGAGGAATATTGGTCAATGGACGCAAGTCTGAACCAGCC  
ATGCCGCGTGAAAGGATGAAGGCCTTCTGGGTGTAAACTTCTTTTACATGGGAAGAAAGG  
CATTGTTTTCTACGATGTCCGACGGTACCATGGGAATAAGCACCGGCTAACTCCGTGCCAG  
CAGCCGCGGTAATACGGAGGGTGCAAGCGTTATCCGGATTTACTGGGTTTAAAGGGTGTG  
TAGGCGGGCTGTTAAGTCAGTGGTGAAATCTCCGGGCTCAACCTGGAAACTGCCATTGAT  
ACTATCAGTCTTGAATCTTGTTGAGGTTGGCGGAATATGTCATGTAGCGGTGAAATGCAT  
AGATATGACATAGAACACCGATTGCGAAGGCAGCTAACTAAACAAGTATTGACGCTGAGG  
CACGAAAGCGTGGGGATCAAACAGGATTAGATACCCCCGTAGTCC

>Otu6692

CCAGCCTACGGGAGGCACACAGTCGAGGATCTTCGGCAATGGGCGCAAGCCTGACCGAGCG  
ACGCCGCGTGAGCGATGAAGGCCTTCGGGTGTAAAGCTCTTTAGTGGGGGAGGAAGGGC  
AACTTGACCGACCCCAAGAATAAGCACGGGCTAAGTTCGTGCCAGCAGCCGCGGTAAGAC  
GAACCGTGCGAACGTTGTTTCGGAATCACTGGGCTTAAAGGGCGCGTAGGCGGCCCGCCAA  
GTCAGGGGTGAAAGCCCCCAGCTCAACTGGGGAAGTGCTTTGATACTGGCGGGCTCGAG  
CGAGGCAGGGGTGCTGGGAACCTCCGGTGGAGCGGTGAAATGCGTTGATATCGGAAGGAA  
CGCCGGTGGCGAAAGCGCACGACTGGTCTTCTTGACGCTGAGGCGCGAAAGCCAGGGG  
AGCGAACGGGATTAGAGACCCCTGTAGTCC

>Otu6693

CCAGCTACGGGTGGCAGCAGTGGGGAATTTTGGACAATGGGCGAAAGCCTGATCCAGCAA  
CGCCGCGTGAGGATGAAGGTCTTCGGATCGTAAACTCCTTTTGATGGGAACGAAAAAA  
TGACGGTACTCATAGAAAAAGCAACGGCTAACTACGTGCCAGCAGCCGCGGTAATACGTA  
GGTTGCAAGCGTTACTCGGATTTACTAGGCGTAAAGCGTATGTAGGCGGTTATGTAAGTC  
TGTGGTGAAATCTCCCGGCTCAACCGGGATAGGTCCACGGAACTGCATGGCTTGAGTGT  
GGGAGAGGGAGACGGAATTCCTGGTGTAGCGGTGAAATGCGTAGATATCAGGAGGAACAC  
CAATGGCGAAAGCAGTCTCCTGGGCCAATACTGACGCTCAGATACGAAAGCTAGGGGAGC  
AAACAGGATTAGAAACCCTAGTAGTCC

>Otu6696

CCAGCCTATGGGTTCGAGCAGTCGAGGAAAATTTTTCAATGCCCCGCAAGGGTGAACGAGTA  
AGCCAGAGTGTTTTCTTTACGAAAACCTTTTGCCTGATGTAAAAAGTCAGGCGAATAAGGA  
CTGGGCAAGACCGGTGCCAGCCGCCGCGGTAATCCCGGCGGTCCAAGTCGCATCCACAAT  
TATTGGGTCTAAAACATCCGTAGCTTGTTTTGTAAAGTCTCTTGTAAGTCTCAAATCTCA  
AGTTTGAGTCGTGCAAGAGATACTACATTGCTAGAGACTGGAAGACGCAAAGAGTACGTA  
GGAGGTAGCGGTAAAATGTGTTAATCTTCTTCGGACTAACAATGGCGAAGGCACCTTGCG  
AGTACAGATCTGACGGTGAGGGATGAAGGCTAGGGGCGCAAAGGGATTAGATACCCGCG  
TAGTCC

>Otu6697

CCAGCCTACGGGGCGCACACAGTGGGGAATTTTTCGCAATGGGGGAAACCCTGACGCAGCA  
ACGCCGCGTGGGTGATGAAGGTCTTCGGATTGTAAACCCTGTCGTCGGGGACGAAGGTG  
GCTTGGCGAATAGCCGAGTTGCTTGACGGTACCCGAGAGGAAGCCCCGGCTAACTCTGT  
GCCAGCAGCCGCGGTAATACAGAGGGGGCAAGCGTTATTCGGAATTATTGGGCGTAAAGG  
GCGCGTAGGCGGTGTTTTAAGTCGGATGTGTAATCCCCGGGCTCAACCTGGGAAGTGCAT  
CCGATACTGGGACGCTGGAGTGCTGGAGAGGGTGGTGGAATTCCTCGTGTAGCGGTGAAA  
TGCGTAGAGATGAGGAGGAACACCAAGTGGCGAAGGCGGCCACCTGGACAGTAAGTACGC  
TGGGGCGCGAAAGTGTGGGGAGCAAACAGGATTAGATACCCTCGTAGTCC

>Otu6707

CCAGCCTATGGGTGGCTGCAGTCGAGAATTTTTCTCAATGGGGGAAACCCTGAAGGAGCG  
ACGCCGCGTGAGGATGAAGGTTTTTCGGATTGTAAACTCCTGTCATTGGGGAACAATTTT  
ACGGTTTTAACTGAGCCGTAATTGATAGTACCCGAAGAGGAAGAGACGGCTAACTCTGTG  
CCAGCAGCCGCGGTAATACAGAGGTCTCAAGCGTTGTTTCGGATTCAATTGGGCGTAAAGGG  
TGCGTAGGCTGTAAGGTATGTTGGATGTGAAATCCCCGGGCTTAACCCCGGAAGTGCATT  
CAATACTGCCCTACTAGAGTACTGGAGAGGAGATTGGAATTCACGGTGTAGCAGTGAAAT  
GCGTAGATATCGTGAGGAAGACCAAGTGGCGAAGGCGGAATCTCTGGACAGTTACTGACGCT  
GAGGCACGAAGGCCAGGGGAGCAAACGGGATTAGAAACCCTCGTAGTCC

>Otu6708

CCAGCCTATGGGGCGCAGCAGTGGGGAATATTGGACAATGGGGGCAACCCTGATCCAGCC  
ATGCCGCGTGTCGATGAAGGCCTTCGGGTGTAAAGCACTTTCCCGGTGAAGATGATG  
ACGGTAGCCGGAGAAGGAGCCCCGGCTAACTCCGTGCCAGCAGCCGCGGTAATACGGAGG  
GGGCAAGCGTTGTTTCGGAATTACTGGGCGTAAAGGGCGCGTAGGCGGCTCGTTGCGTCAG

GTGTGAAAGCCCTGGGCTCAACCTGGGAACTGCACTTGATACGGGCGAGCTTGAATCCGG  
GAGAGGATGGTGGAATTCACAGTGTAGAGGTGAAATTCGTAGATATTGGGAAGAACACCG  
ATGGCGAAGGCAGCCATCTGGCCCGGTTATTGACGCTGAGGCGCGAAAGCGTGGGGAGCA  
AACAGGATTAGAAACCCTAGTAGTCC

>Otu6713

CCAGCCTATGGGGGGCTCCAGTGAGGAATATTGCGCAATGGCCGAAAGGCTGACGCAGCG  
ACGCCGCGTAGGGGAAGACGGCCTTCGGGTGTAAACCCCTGTCAGTGGGGAAGAAGAAA  
GTGACGGTACCCACAGAGGAAGCCCCGGCTAACTACGTGCCAGCAGCCGCGGTAAGACGT  
AGGGGGCGAGCGTTGTTTCGGAATTACTGGGCGTAAAGAGCTCGTAGGCAGGAGATTAAGT  
CTTGCAATAAAGTCCGTGGCTCAACTACGGGGAATTGCGAGATACTGATTTTCTTGAGAA  
CAGGAGAGGGGAGTGGAATTCCTAGTGTAGCGGTGAAATGCGTAGATATTAGGAGGAACA  
CCAGTGGCGAAGGCGGCTCTCTGGCCTGTTTCTGACGCTGAGGAGCGAAAGCTGGGGGAG  
CGAACGGGATTAGAGACCCGTGTAGTCC

>Otu6721

CCAGCCTATGGGAGGCTCCAGTAAGGAATATTGGACAATGGTGGCAACACTGATCCAGCC  
ATGCCGCGTGCAGGATGAAGGCGCTACGCGTTGTAAACTGCTTTTGTACGGGAGAAAACC  
TATCTACGTGTAGATAGCTGATAGTACCGTAAGAATAAGCACCGGCTAACTCCGTGCCAG  
CAGCCGCGGTAATGCGGAGGGTGCAAGCGTTATCCGGATTTATTGGGTTTAAAGGGTGCG  
TAGGCGGTTAAATAAGACAGTGGTGAAAATCTGCAGCTCAACTGTAGGGGTGCCATTGAA  
ACTGTTTTACTTGAGTAACCATGAGGTAGGCGGAATGTGTAGTGTAGCGGTGAAATGCTT  
AGATATTACACAGAACACCGATTGCGTAGGCAGCTTACTAGCGGTTTACTGACGCTGATG  
CACGAAAGCGTGGGGATCAAACAGGATTAGATACCCTCGTAGTCC

>Otu6723

CCAGGCCTACGGGGGGCTGCAGTGGGGAATTTTGGACAATGGGGGCAACCCTGATCCAGC  
CATGCCGCGTGTCTGAAGAAGGCCTTCGGGTGTAAAGGACTTTTGTACGGGAGCAAATA  
CTGCTTGTGAATAATGAGCGGGAATGAGAGTACCTGAAGAATAAGCTCCGGCTAACTACG  
TGCCAGCAGCCGCGGTAATACGTAGGGTGCAAGCGTTAATCGGAATTACTGGGCGTAAAG  
CGTGCGCAGGCGGTTTTTGCAAGTCTGATGTGAAAGCCCCGGGCTTAACCTGGGAACGGCA  
TTGGAGACTGCAAGGCTAGAGTACGTGAGAGGGGGGTAGAATTCCACGTGTAGCAGTGAA  
ATGCGTAGAGATGTGGAGGAATACCGATGGCGAAGGCAGCCCCCTGGGATGATACTGACG  
CTCATGCACGAAAGCGTGGGGAGCAAACAGGATTAGAAACCCAGTAGTCC

>Otu6733

CCAGCCTATGGGGCGCAGCAGTCGAGAATATTCGACAATGGGCGAAAGCCTGATCGAGCG  
ACGCCGCGTGCAGGATGAAGGTCTTAGGATTGTAAACTGCTTTTCCGCGGGAGGAAGTCG  
AAGCACATAACTTGTTATGTGCTCGATTGACAGTACCGCGGGAATAAGGGGCTGCAAACT  
TCGTGCCAGCAGCCGCGGTAATACGAAGGCCCGAGCGTTATCCGGATTTATTGGGCGTA  
AAGGGCGCGTAGGAGGTCCGATGCGTCTCTTGTAATAATTCACCGCTCAACGGTGGAGCT  
GCAAGGGATACGGTTCGACTTGAGGGCGTTAGAGGCAGATGGAACACACGGTGTAGGGGT  
GAAATCCGTTGATATCGTGTGGAACACCAAAGGCGAAGGCATTCTGCTGGGACGTTCTTG  
ACTCTGAGGCGCGAAAGCGTGGGGAGCAAAAAGGATTAGATACCCTTGAGTCC

>Otu6734

CCAGCCTACGGGGGGCTGCAGCGAGGAATATTGGTCAATGGACGAGAGTCTGAACCAGCC  
AAGTCGCGTGAAGGAAGAAGGTTCTATGGATTGTAAACTTCTTTTGTAAAGGAATAAAAC  
AGGCCACGTGTGGCTTCTTGATGTACTTTACGAATAAGGATCGGCTAACTCCGTGCCAG  
CAGCCGCGGTAATACGGAGGATCCGAGCGTTATCCGGATTTATTGGGTTTAAAGGGTGCG  
TAGGCGGACCTGTAAGTCAGTGGTGAAAGTTTGC GGCTCAACCGTAAAATTGCCATTGAA  
ACTATAGGTCTTGAGTGTAATGAGGTAGGCGGAATGTGTTGTGTAGCGGTGAAATGCTT  
AGATATAACACAGAACACCAATTGCGAAGGCAGCTTACTAGAATACAACCTGACGCTGAGG  
CACGAAAGCGTGGGGATCAAACAGGATTAGATACCCCGTAGTCC

>Otu6735

CCAGCCTACGGGGGGCTGCAGTGGGGAATATTGCGCAGTGGGCGAAAGCCTGACGCAGCG  
ACGCCGCGTGGGTGATGAAGGCCTTCGGGTGCTAAAGCCCTGTCGGGAGGGAAGAAACCT  
CGGCGACCGAATACGTGCTGACCTGACGGTACCTCCGAAGGAAGCACCGGCTAACTCCG  
TGCCAGCAGCCGCGGTAATACGGAGGGTGCGAGCGTTGTTTCGGAATCACTGGGCGTAAAG  
CGCGTGTAGGCGGCCTTCTAAGTCTGGTGCGAAAGCCCCGGGGCTTACCCCGGAACTGCG  
CTGGAACCTGGGAGGCTCGAGTACCGGAGAGGAGGGTGGAATTCCTGGTGTAGCGGTGAA  
ATGCGTAGATATCAGGAGGAACACCGGTGGCGAAGGCGGCCCTCTGGACGGATACTGACG  
CTGAGACGCGAAAGCGTGGGGAGCAAACAGGATTAGATACCCGCGTAGTCC

>Otu6737

CCAGCCTATGGGGGGCTGCAGCAAGGAATCTTCCGCAATGGACGAAAGTCTGACGGAGCG  
ACGCCGCGTGAGGATGAAGTGCTTCGGCATGTAAACTCCTTTTGCCGGGGAAAAAGTTT  
ATTGATTGTACCCGGAGAATAAGAAGTTGCTAAACTCGTGCCAGCAGCAGCGGTAATACG  
AGTGCTTCGAGCGTTATCCGGAATTATTGGGCGTAAAGGGTGTGTAGGCGGCAGTGTTAG  
TCTCTCGTAAAAATTCCTCGGCTCAACCGAGGGCGCGGAGAGAAACGGCACAGCTCGAGT  
ATGGAAGGGGTCTTTGGAACATCATGGTGTAGCGGTGAAATGCGTTGATATCATGGGGAAC  
ACCGAAAGCGAAGGCAGAAGACTGGTCCATTACTGACGCTGAAACACGAAAGCGTGGGTC  
GCGAATGGGATTAGAAACCCGAGTAGTCC

>Otu6738

CCAGCCTACGGGACGCTCCAGGCGCGAAACCTTTACAATGCACGCAAGTGTGATAAGGGG  
ACTCTAAGTGCATGCACAAAGTGCATGCTTTTGCCAAATGCAAATAGTTTGGCGAATAAG  
TGGTGGGTAAGACGGGTGCCAGCAGCCGCGGTAACACCCGCGCCACAAGTGGCAACCGAT  
TTTATTGGGCCTAAAGCGTCCGTAGCTGGTCTAGAAAATCTCTTGTGAAAATGTTGAGCT  
TAACTTAACAAAAGGCGAGGAGACACTACTAGACTCGGAACCGGTAGGGGTAAGAAGTATG  
TTAGGGGTAGCGGTAAAATGTTATAATCCCTAATAGACTACCTGTGGCGAAGGCGTCTTA  
CTAGGACGGATTTCGACAGTGAGGGACGAAAGCCAGGGGAGCGATCCGGATTAGAGACCCG  
AGTAGTCC

>Otu6739

CCAGCCTATGGGAGGCACCAGCAACGAATCTTCCCAATGCCGGAACGGTGAGGGAGCG  
ACGCCGCGTGAGGATGAAGTCTTTCGGGATGTAAACTTCTTTTAGGGATAAGAAAGCAG  
AGGGACCTAATACGTCCTGAGTTGATCTATCCAGAATAAGGGGCGGCTAACTCTGTGCC  
AGCAGCCGCGGTAATACAGAGGCCCAAGCGTTACTGAGAATCACTGGGTTTAAAGGGTG  
CGTAGGTGGTCCGTTAAGTCAGTTGTGAAATCCCCGGGCTCAACCCGGGAACCTGCTTCTG  
ATACTGGCGGACTTGAGGCCAGTAGGGGTCACTAGAACTGACGGTGGAGCGGTGAAATGC  
GTAGATATCGTCAGGAATGCCGGTGGTGAAGACGGGTGACTGGGCTGGTTCTGACACTGA  
GGCACGAAAGCTAGGGGAGCGAACGGGATTAGAGACCCCTGTAGTCC

>Otu6744

CCAGCCTACGGGGGGCAGCAGTGGGGAATCTTCCACAATGGGCGAAAGCCTGATGGAGCA  
ACGCCGCGTGAGTGATGAAGGCCTTCGGGTGTAAACTCTGTCTTGCAAGAATAAGGCT  
GCCGGGTAAATAATCCGGCAGTTTGACTGTATTGCAGGAGGAAGACACGGCTAACTCTGT  
GCCAGCAGCCGCGGTAATACAGAGGTGTCAAGTGTTGTCCGGAATTACTGGGCGTAAAGG  
GCGTGTAGGCGGGTAGGCAAGTCAGATGTGAAATCACTGGGCTCAACCCAGTAACTGCAC  
CTGAAACTGCCTGTCTTGAGTACAGAAGAGGAAAGCGGAATTCCTGGTGTAGCGGTGAAA  
TGCGTAGATATCGGGAGGAACACCAGTGGCGAAGGCGGCTTCTGGTCTGTTACTGACGC  
TGAAACGCGAAAGCTAGGGGAGCAAACGGGATTAGAGACCCGAGTAGTCC

>Otu6750

CCAGCCTATGGGTGGCAGCAGTCGAGAATCATTTGCAATGGACGAAAGTCTGACAATGCG  
ACGCCGCGTGAGTGATGAAGGCCTTCGGGTGTAAACTGCTGTGAGGGGTTATGAACGCC  
GCGCGTGGACAATACGCGCGGTTTGACAAAGGCCCAAGGAAGCTCCGGCTAAATCCGT  
GCCAGCAGCCGCGGTAATACGGATGGAGCAAGCGTTGTTTCGGAATCACTGGGCATAAAGC  
GCATGTAGGCGGCTCTGAAAGTCGGATGTGAAATCCCCCGGCCACCCGGGGAACCGCAT  
TCGAAACTCCAGGGCTTGAGTGAAGAAGGGGAGAGTGGAACCTCCTGGTGGAGCGGTAAAA  
TGCGTAGATATCAGGAGGAACCCGGTGGAGAAGTCGACTCTCTGGTCTTTTACTGACGC  
TGAGATGCGAAAGCTAGGGGAGCAAACAGGATTAGAAACCCCGGTAGTCC

>Otu6752

CCAGCCTACGGGTGGCAGCAGTGGGGAATATTGGACAATGGGCGCAAGCCTGATCCAGCC  
ACGCCGCGTGAGTGATGAAGGTCTTCGGATTGTAAAGCTCTGTTGATTGGGAAGAAAAGT  
TCCGGGAATAATACCTCGGGACGTGACGGTACCAGTCGAGGAAGCACCCGGCTAACTACGT  
GCCAGCAGCCGCGGTAATACGTAGGGTGCAAGCGTTGTTTCGGAATCACTGGGCGTAAAGG  
GAGAGTAGGCGGGAAAATAAGTTAGAAGTTAATATATAGGCTTAACCTATAACCTGCTT  
CTAATACTGTTTTCTTGAGTATTGGAGAGGGAGATGGAATTCAGGTGTAGCGGTGGAA  
TGCGTAGATATCTGGAAGAACACCAGCTGCGAAGGCGGTCTCCTGGCCAAATACTGACGC  
TGATGCTCGAAAGCTAGGGGAGCAAACAGGATTAGATAACCCGAGTAGTCC

>Otu6756

CCAGCCTACGGGTGCTGCAGTGGGGAATTTTGCGCAATGGGCGAAAGCCTGACGCAGCA  
ACGCCGCGTGGGTGATGAAGGTCTTCGGATCGTAAACCCCTGTGCCAGGGACGAAGGTC  
GGTCGTTGAATAGGCGATTGGCTTGACGGTACCTGGAGAGGAAGCCCCGGCTAACTCTGT



GCCAGCAGCCGCGGTAATACAGAGGGGGCAAGCGTTATTTCGGAATTATCGGGCATAAAAGG  
GCACATAAACGGTTTTTTTAAAGTAAGATGTGCAATCCCCGAGCTTAACTTGGGAACGTCAT  
CTCAGACTGGAAGGCTAGAGTGCTGGAGAGGGTGGTAGAATTCACGTGTAGCGGTGAAA  
TGCGTAGAGATGTGGAGGAATACCAGTGGCGAAGGCGGCCACCTGGACAGTAACTGACGC  
TGAGGCGCGAAAAGTGTGGGTAGCGAACAGGATTAGAGACCCGAGTAGTCC

>Otu6761

CCGCCTACGGGTTCGAGCAGTCGAGAATCTTCGTCAATGCACGCAAGTGTGAACGAGCGA  
CGCCGCGTGAGCGATGACGCCCTTCGGGGTGTAAAGCTCTTTTATTGGGGACAACTTTG  
ATGGTACCCAGTGAATAAGAGGTTGCTAACTCTGTGCCAGCAGCAGCGGTAATACAGAGA  
CCTCAAGCGTTATCCGGATTTATTGGGCGTAAAGAGTCTGTAGGTTGAATAAATAGTCAG  
ATGTCAAATTTTAGGGCTTAACCTTAAACTGCATTTGAAACGTTTGTCTAGAGGACAG  
TAGGGGCAAGTAGAAGTTATAGTGTAGCAGTAAATGCGTTGATATTATAAGGAATACCA  
AAAGCGAAGGCATCTTGCTGGACTGTTTCTGACACTGAGAGACGAAAGCGTGGGTAGCGA  
ATGGGATTAGAGACCCTCGTAGTCC

>Otu6768

CCAGCCTATGGGTGGCAGCAGTGAGGAATATTGGTCAATGGACGGAAGTCTGAACCAGCC  
ATCCCGCGTGAAAGGAAGAAGGCGCTATGCGTTGTAAACTTCTTTTCCGAGAGAAGAAAAC  
CCCCGACGAGTCGGGGCTTGCGGTATCTTGGAATAAGCATCGGCTAACTCCGTGCCAG  
CAGCCGCGGTAATACGGAGGATGCAAGCGTTATCCGGATTTATTGGGTTTAAAGGGAGCG  
TAGGCGGTTTTATAAGTCAGTGGTGAAATCTCGTTGCTTAACAACGAACGTGCCATTGAT  
ACTGTAGAACTTGAGTACAGATGATGTTGGCGGAATGTGTCATGTAGCGGTGAAATGCTT  
AGATATGACACAGAACACCGATTGCGAAGGCAGCTGACAAAACGTAACTGACGCTGAGG  
CTCGAAAGCGTGGGGATCAAACAGGATTAGAGACCCGAGTAGTCC

>Otu6774

CCAGCCTACGGGGGGCAGCAGTTTCGAATATTTCTCAATGGGGGAAACCCTGAAGGAGCG  
ACGCCGCGTGAGGATGAAGGGCTTCGGCTTGTAAGCTCCTGTCATCTGGGAATAATGTG  
CCGGCAGCTAATACCGGCCCGCATTGACTGTACCAGGAGAGGAAGGGACGGCTAACTCTG  
TGCCAGCAGCCGCGGTAATACAGAGGTCCCGAGCGTTGTTTCGGATTTATTGGGCGTAAAG  
GGTGCGTAGGCGGTCATGTAAGTCGGATGTGAAATCCCGCAGCTCAACTGCGGAACGGCA  
TCTGATACTGCTTGACTCGAAGACTGGAGAGGAGACTGGAATTTGCGGTGTAGCGGTGAA  
ATGCGCAGATATCGCAAGGAACACCGAGTGGCGAAGGCGGGTCTCTGGACAGTTCTTGACG  
CTGAGGCACGAAAGCTAGGGGAGCAAACGGGATTAGATAACCCAGTAGTCC

>Otu6777

CCAGCCTACGGGTGGCAGCAGTCGAGGATCATTCGCAATGGGCGCAAGCCTGACGGTGCG  
ACGCCGCGTGAGGATGAAGGCCTTCGGGTGTAAACTGCTGTCATGAGGGAGCAACGAC  
TCTAGCTCTAATACCGCTAGGGAATGATAGTACCTCAGGAGGAAGCCACGGCTAACTCTG  
TGCCAGCAGCCGCGGTAATACAGAGGCGGCAAGCGTTGTTTCGGATTTACTGGGCGTAAAG  
GGTGCGTAGGCGGTTCCGTGTGTCGGATGTGAAAGCCCGCAGCTCAACTGCGGAACGGCA  
TTCGAGACTACGGTGCTGGAGTACGAGAGAGGAGAGCGGAATTCTTGGTGTAGCAGTGAA  
ATGCGTAGATATCAAGAAGAACACCGGTGGCGAAGGCGGCTCTCTGGATCGATACTGACG  
CTGAGGCACGAAAGCAGGGGAGCAAACAGGATTAGAAACCCGCGTAGTCC

>Otu6779

CCAGCCTACGGGGCGCTGCAGTCGAGAGGCTTCGGCAATGGGGGAAACCCTGACCGAGCG  
ACGCCGCGTGGGCGATGAAGGCCGTTAGGTTGTAAAGCCCTGTCGAGTAGGAAGAAACGC  
AGGTGGGCGAACAGTCCATCTGCTTGACGGTACTGCTAAAGGAAGCTCCGGCCAACTCCG  
TGCCAGCAGCCGCGGTAATACAGAGGTCCCAAGCGTTGTTTCGGATTCACTGGGCGTAAAG  
GGTGCGTAGGTGGTGAGGTAAGTCGGATGTGAAATCTCGGAGCTCAACTCCGAAATGGCA  
TTGGATACTACCTTGCTCGAGGGTTGGAGGGGGGACTGGAATACTTGGTGTAGCAGTGAA  
ATGCGTAGATATCAAGTGAACACCGAGTGGCGAAGGCGAGTCCCTGGATAACTCCTGACA  
CTGAGGCACGAAAGCTAGGGGAGCAAACAGGATTAGATAACCTTGTAGTCC

>Otu6783

CCAGCCTACGGGGCGCTGCAGTGGGGAATTTTGGACAATGGGGGCAACCCTGATCCAGCC  
ATTCCGCGTGAGTGAAGAAGGCCTTCGGGTGTAAAGCTCTTTCGGCAGGAACGAAACGG  
TGGAGGCTAATACCTTTTCATCAATGACGGTACCCTAAGAATAAGCACCGGCTAACTACGT  
GCCAGCAGCCGCGGTAATACGTAGGGTTCGAGCGTTAATCGGAATTACTGGGCGTAAAGC  
GTGCGCAGGCGGTTATGTAAGACAGATGTGAAATCCCCGGGCTCAACCTGGGACCTGCAT  
TTGTGACTGTATAGCTAGAGTACGGTAGAGGGGGATGGAATTCGCGGTGTAGCAGTGAAA  
TGCGTAGATATGCGGAGGAACACCGATGGCGAAGGCAATCCCCTGGACCTGTACTGACGC

TCATGCACGAAAAGCGTGGGGAGCAAACAGGATTAGATACCCGTGTAGTCC

>Otu6788

CCAGCCTATGGGGCGCAGCAGTAAGGAATATTGGTCAATGGACGAAAGTCTGAACCAGCC  
ATGCCGCGTGAAGGATGAAGGCCCTCTGGGTGTAAACTTCTTTTATCTGGGACGAAAAA  
AGGGGATTCTTCTCACCTGACGGTACCAGAGGAATAAGCACCGGCTAACTCCGTGCCAG  
CAGCCGCGGTAATACGGAGGGTGCAAGCGTTATCCGGATTTACTGGGTTTAAAGGGTGCG  
TAGGTGGGCAGGTAAGTCAGTGGTGAAATCTTTGGGCTTAACCCGAAAACTGCCATTGAT  
ACTATCTGTCTTGAATATCCTGGAGGTAAAGCGGAATATGTCATGTAGCGGTGAAATGCTT  
AGATATGACATAGAACACCCATTGCGAAGGCAGCTTACTACGGGATTATTGACACTGAGG  
CACGAAAGCGTGGGTAGCGAATGGGATTAGAGACCCTCGTAGTCC

>Otu6789

CCAGCCTACGGGTCGCTGCAGTGGGGAATATTGGGCAATGGGCGAAAGCCTGACCCAGCG  
ACGCCGTGTGGGCGATGAAGGCCTTCGGGTGTAAAGCCCTGTTGGGTGGAAAGAAGGAA  
CCAGAGACGAATAATCTTTGGCTCTTGACGGTACCACCAGAGAAAGCACCGGCTAACTCC  
GTGCCAGCAGCCGCGGTAATACGGAGGGTGCAAGCGTTGTTGGAATTACTGGGCGTAAA  
GGGCGCGTAGGTGGTTGCGTAAGTCGGATGTGAAATCTCGGAGCTTAACTCCGAAATGGC  
ATTGAAACTACCTTGCTCGAGGGTTGGAGGGGGGACTGGAATACTTGGTGTAGCAGTGA  
AATGCGTAGATATCAAGTGGAACACCAGTGGCGAAGGCGAGTCCCTGGACAACCTCCTGAC  
ACTGAGGCACGAAAGCTAGGGGAGCAAACAGGATTAGAGACCCGTGTAGTCC

>Otu6792

CCAGCCTACGGGAGGCTCCAGCAACGAATATTCCGCAATGGGCGCAAGCCTGACGGAGCG  
ACGCCGCGTGAAGGATGAAGTCCTTCGGGATGTAAACTTCAATAGTTTGTGAGGAACCAA  
ATTGGATTAATACGCTATGTTGCTGACCAACAAACGAAAGGGGTGGCTAACTTCGTGCC  
AGCAGCCGCGGTAAGACGGGGACCCCAAGCGTTGTTGGAATCACTGGGCTTAAAGCGCG  
TGTAGGCGGATCGGCAAGTACTTTGTGAAAGCCCCGGCTTCAACCCGGGAATCGCTGGGT  
ATACTGCCGATCTTGAGGCAGGTAGGGGTACTGGAACCTTAGGTGGAGCGGTGAAATGC  
GTAGATATCTAAGGGAACGCCCTGTGGCGAAAGCGGGTAAGTGGGCCTGTCCTGACGCTGA  
GACGCGAAAGCGTAGGGAGCAAACGGGATTAGATACCCGGGTAGTCC

>Otu6793

CCAGCCTATGGGAGGCTCCAGTGGGGAATTTTTCTGCAATGGGGGCAACCCTGACGAAGCA  
ACGCCGCGTGGAGGATGAAGGTCTTCGGATTGTAAACTCCTGTGATCGGGACGAAAACG  
GAGCGACCTAATACGTCGCATCGTTGACTGTACCGGTGGAGGAAGCCACGGCCAACCTCTG  
TGCCAGCAGCCGCGGTAATACAGAGGTGGCAAGCGTTGTTGGAATTATTGGGCGTAAAG  
GGCGCGTAGGTGGTCTAGCAAGTCCTGTGTGAAATCCCTCAGCTCAACTGAGGAAGTGA  
CAGGAGACTGCCTGACTTGAGTTCGGGAGAGGGACGCGGAATTCCGGGTGTAGCGGTGAA  
ATGCGTAGATATCCGGAGGAACACCAGAGGCGAAGGCGGCGTCTGACCGATACTGACA  
CTGAGGCGCGAAAGCTAGGGGAGCAAACGGGATTAGAAACCCTAGTATCC

>Otu6794

CCAGCCTATGGGTCGCAGCAGTCGAGAATTTTTCTCAATGGGCGCAAGCTTGAAGGAGCG  
ACGCCGCGTGGGGGATGAAGGGCTTCGGTCTGTAAACCCCTGTCATTTGCGAACAAACCT  
TCGGATTGAATAGTCCGGAGCTGATTGTAGTGAAAGAGGAAGGGACGGCTAACTCTGTG  
CCAGCAGCCGCGGTAATACAGAGGTCCCAAGCGTCGTTTCGGATTCACTGGGCGTAAAGGG  
TGCGTAGGTGGTGAGGCAAGTTTGGTGTGAAATCTCCGAGCTCAACTCGGAAACGGCACT  
AAAACTGGTTTGTGAGGGTTCGGAAGGGAGACTGGAATTCTCGGTGTAGCGGTGAAAT  
GCGTAGATATCGAGAGGAACACCAGTGGCGAAAGCGAGTCTCTGGACGACACCTGACACT  
GAGGCACGAAAGCTAGGGGAGCAAACAGGATTAGAAACCCTAGTAGTCC

>Otu6795

CCAGCCTATGGGGGGCTCCAGTGGGGAATATTGCACAATGGGCGCAAGCCTGATGCAGCG  
ACGCCGCGTGGAGGATGAAGGTTTTCGGATTGTAAACTCCTGTTAAGTGGGAAGAAAGAC  
CCATGGCTAATATCCATGGGGGATGACGGTACCGCTAGAGAAAGCACCGGCAAACCTTCGT  
GCCAGCAGCCGCGGTAATACGAAGGGTGCGAGCGTTATTTCGGAATGACTGGGTGTAAAGA  
GCGTGGAGGCGGCTTTGTAAAGTCAGCTGTAAATAGCCCGGCTTAACTGGGCAAATGCGG  
TTGATACTATAAGGCTAGAGTACAAGAGAGAAGAGTGGAATTCTCGGAGTAGCGGTAAAA  
TGCGTAGATCTCGAGAGGAACACCGGTTGCGAAGGCGGCTCTTTGGCTTGTAAGTACGCG  
TTAAGCGCGAAAGCGTGGGGAGCAAACAGGATTAGAAACCCCGTAGTCC

>Otu6797

CCAGCCTATGGGGTGCTCCAGCTTAGGAAATTTCTTCAATGCCCCGAAGGGTGAAAGAGTA  
AACCAGAGTGTTTCCTTTTAGGAAACTTTTGTCTGCTGTAAAAAGGCAGATGAATAAGGA

CTGGGCAAGACCGGTGCCAGCCGCCGCGGTAATCCCGGCGGTCCGAGTCGCATCCACATT  
TATTGGGTCTAAAACATCCGTAGCTTGTTTTCATAGTCTCTTGTGAAATCTCATTTCTCA  
AACTTGAGGCGTGCAAGAGATACTATGTTGCTAGAGATCGGAAGACGTAAAGAGAACGAT  
GGAGGTAGCGGTAAAATGTGTTAATCTTCGTCGGACTAACAATGGCGAAGGCACCTTTACG  
AGTACGAATCTGACAGTGAGGGATGAAGGCTAGGGGCGCAAAGGGATTAGATACCCGCG  
TAGTCC

>Otu6798

CCAGCCTATGGGAGGCTGCAGTGGGGAATCTTCCGCAATGGACGAAAGTCTGACGGAGCA  
ACGCCGCGTGAGTGAAGAAGGCTTTCGGGTCGTAAAGCTCTGTTATTCGGGACGAACGGT  
CAGAGTGTAATAATGCTCTGGAGTGACGGTACCGAAGGAGGAAGCCACAGCTAACTACG  
TGCCAGCAGCCGCGGTAATACGTAGGTGGCAAGCGTTGTCCGGAATTATTGGGCGTAAAG  
CGCGCGCAGGTGGGATAGTAAGTCTTTTGTAAAAGTGCAGGGGCTCAACCCCGTAAAGCGA  
TGGATACTGCTATTCTTGAGTGCCGGAGAGGAAAGCGGAATTCAGTGTAGCGGTGAAA  
TGCGTAGATATTGGGAGGAACACCAGTGGCGAAGGCGGCTTCTGGACGGTGTCTGACAC  
TGAGGCGCGAAAGCTAGGGGAGCGAACGGGATTAGATACCCAGTAGTCC

>Otu6801

CCAGCCTACGGGGGGCTGCAGTCGAGAATCTTTTCCAATGGACGAAAGTCTGAGAATGCG  
ACGCCGCGTGAGGGACGAAGGTCTTCGGATTGTAAACCTCTTTTGTGCGGGAGGAAGTTG  
CGCTTTTTTAATAGAAGGCGTAATTGACTGTACCTGATGAATAAGCCACGGCTAACTCCGT  
GCCAGCAGCCGCGGTAATACGGAGGTGGCAAGTGTTACTCGGTTTGACTGGGTGTAAAGG  
GTCCGCAGGCGGTTTGATAAGTGAAAAGTGAAATCCTTTTGCTCAACGAAAGAAGTGCTT  
TTCAAATATCATACTTGAGGATGGGAGAGGAGAGTGGAACGTCTCGGTGTAAAGGTGAAA  
TTTGTGGAGATCGACAGGAATGCCCCGTGGAGAAGTCGGCTCTCTGGTCCATACCTGACGC  
TCAGGGACGAAAGCTAGGGGAGCAAACAGGATTAGATACCCGAGTAGTCC

>Otu6806

CCAGCCTATGGGGGGCAGCAGTCTCGAATCATCTGCAATGCGCGAAAGCGTGACAGTGCG  
ACGCCGCGTGCGGGAGGAAGCCCTTCGGGGTGTAACCGCTTTTCAGGGGCATGAAGTGC  
CGGCGTTGAATAGGCGCCGGCATTGACCTAAACCCTGGAATAAGCCACGGCTAACTTCGT  
GCCAGCAGCCGCGGTAAGACGAAGGTGGCGAGCGTTGCTCGGAATCACTGGGCTTAAAGC  
GGGCGTAGGCGGGCCCGGTGAGTCGGGTGTGAAAACCCTTGCTCAACCAAGGAACGGCAC  
CCGATACTACCGGGCTTGAGGCGATTAGGGGCGACTGGAACCTCTCGGTGGAGCGGTGAAA  
TGCGTAGATATCGAGAGGAACGCCAATGGTGAAGACAGGTGCTAGGATCGTCCTGACGC  
TGAGGCCCGAAAGCTAGGGGAGCAAACGGGATTAGAAACCCGCGTAGTCC

>Otu6809

CCAGCCTATGGGTGCGACCAGTTAAGAATCTTGCAATGGGGGAAACCCTGAAGGAGCG  
ACGCCGCGTGAAAGGATGAAGGTCTTCGGATTGTAACTTCTGTCTATTAGAGAACAAGTGT  
CGCCGGTTAACTGCCGGCGGCTTGATAGTATCTGAAGAGGAAGGGACGGCTAACTCTGTG  
CCAGCAGCCGCGGTAATACAGAGGTCCCAAGCGTTGTTTCGGATTCAATTGGGCGTAAAGGG  
TGCGTAGGTGGCGGGGTAAGTTGGATGTGAAATCCCGGGGCTCAACCCCGGAACCTGCATT  
CAATACTGCCCTGCTGGAGTACTGGAGAGGAGATTGGAATTTACGGTGTAGCAGTGAAAT  
GCGTAGATATCGTAAGGAAGACCGGTGGCGAAGGCGGATCTCTGGACAGTTACTGACACT  
GAGGCACGAAGGCCAGGGGAGCAAACGGGATTAGAAACCCTGGGTAGTCC

>Otu6811

CCAGCCTATGGGTGCGCAGCAGTGGGGAATATTGCGCAATGGGCGAAAGCCTGACGCAGCG  
ACGCAGCGTGAGGGACGACGGCCTTCGGGTTGTAAACCTCTTTCAGCGGGGACGAAGCGC  
AAGTGACGGTACCCGCGAGAAGAAGCACCGGCTAACTACGTGCCAGCAGCCGCGGTAATAC  
GTAGGGTGCAAGCATTGTCCGATTTATTGGGCGTAAAGAGCTCGTAGGCGGCTTGTAC  
GTCGGGTGTGAAAACCTCGGGGCTTAACCCCGAGCCTGCACTCGATACGGGCTGGCTAGAG  
TGTTGCAGGGGAGACTGGAATTCCTGGTGTAGCGGTGAAATGCGCAGATATCAGGAGGAA  
CACCGGTGGCGAAGGCGGGTCTCTGGGCAACTACTGACGCTGAGGAGCGAAAGCGTGGGG  
AGCGAACAGGATTAGAAACCCCGTAGTCC

>Otu6815

CCAGCCTATGGGACGCTGCAGTAAGGAATATTGGACAATGGTGGCAACACTGATCCAGCC  
ATGCCGCGTGCAAGGATGAAGGCGCTACGCGTTGTAACTGCTTTTGTACGGGAGAAAACC  
TATCTACGTGTAGATAGCTGATAGTACCGTAAGAATAAGCATCGGCTAACTTCGTGCCAG  
CAGCCGCGGTAATACGAAGGATGCAAGCGTTATCCGGATTCAGTGGGTTTAAAGGGTGCG  
TAGGTGGCTTTGTAAAGTCAGTGGTGAAAGCCCGGAGCTCAACTCCGGAACCTGCCATTGAT  
ACTGCTTAGCTTGAATCACGTCGAGGTGGATGGAATAATACATGTAGCGGTGAAATGCTT

AGATATGTATTAGAACACCGATTGCGAAGGCAGTTCAGTAGGCGTGTATTGACACTGAGG  
CACGAAAGCGTGGGGATCAAACAGGATTAGATACCCCGGTAGTCC  
>Otu6816  
CCAGCCTACGGGGGGCTGCAGTGAGGAATTTTGCACAATAGGGGAAACCCTGACGCAGCA  
ACGCCGCGTGAGTGAAGAAGGCCTTCGGGTCGTAAAGCTCTGTCAAGTGGGAAAAAATTC  
AACCGGTGAATAGCCGGTTGGCCTGATGGTACCCTAGAGGAAGCACCGGCTAACTCCGT  
GCCAGCAGCCGCGTAATACGGAGGGTGCAAGCGTTGTTTCGGAATTACTGGGCGTAAAGC  
GCGTGTAGGCGGTTTGGTAAGTCAGATGTGAAAGCCCTGGGCTCAACCCAGGAAGTGCAT  
TTGAACTGCCTTACTCGAGTATGGGAGAGGAGAGTGAATTTCCAGTGTAGAGGTGAAA  
TTCGTAGATATTGGGAGGAACACCCGTGGCGAAGGCGACTCTCTGGACCAATACTGACGC  
TGAGACGCGAAAGCGTGGGGAGCAAACAGGATTAGATACCCGTGTAGTCC  
>Otu6822  
CCAGCCTATGGGAGGCAGCAGTGAGGAATCTTCCGCAATGGGCGAAAGCCTGACGGAGCG  
ACACCGCGTGAAGGATGAAGCCCTTTCTGGGCGTAAACTTCTGTTCTGAGGGACGAAATT  
TTTGACGGTACCTCAGGAGAAAGCATCGGCTAACCCCTGTGCCAGCAGCCGCGGTAAGACA  
GGGGATGCAAGCGTTACTCGGAATTACTGGGCGTAAAGCGTCTGTAGGCTTCTTTCCACG  
TCTGGTGTAAATGTCGGAGCCCAACTCCGTACAGTCCCGGAAACGAGAGAGATTGAGTC  
AATCAGAGGCATCTGGAATGTCGTGTGTAGGGGTAAAATCCGTTGATCCACGATGGAACG  
CCAAAAGCGAAGGCAGGATGCTGGGGTTGTACTGACGCTCAGAGACGAAAGCGTGGGGAG  
CAAAGGGGATTAGATACCCTCGTAGTCC  
>Otu6824  
CCAGCCTATGGGGGGCTCCAGTGAGGAATATTCTGCAATGGACGAAAGTCTGACAGAGCA  
ATACCGCGTGGGGGATATGAAGGCGTGATAGTTGTAAACCTCTTTACTCAAGGATGAACT  
TTTTTGACACTACTTGTAGAAGTAAGTATCGGCTAAACCTGTGCCAGCAGCCGCGGTAAT  
ACAGGAGATGCGAGTGTTATCCGGAATTATTGGGCGTAAAGTGTCTGTGGGCGGAAATCT  
AAGTTCTATGTTAAATATTTAAGCTCAACTTAAATAAAAAGCATAGAATACTATTTTTCT  
AGAGTATTTTAGAGGATCTGAGAATTTTCAGTGGAGCGGTAGAATGCATAGATATTGAAA  
GGAATACCAAATGCGAAAGCACTTTTCTGGATTTTACTGACGCTAAGAGACGAAAGCTAG  
GGGATCATACAGGATTAGAAACCCAGTAGTCC  
>Otu6827  
CCAGCCTACGGGATGCTCCAGTCGAGAATTTTTCTCAATGGGCGAAAGCCTGATGGTGCG  
ACGCCGCGTGGGGGATGAAGGTCTTCGGATTGTAAACCCCTGTCACCGGGGAAGAAACGC  
TTCAAGTTAACAGCTTGAAGCCTGACTTAACCCGGAGAGGAAGCAGTGGCTAACTCTGTG  
CCAGCAGCCGCGGTAATACAGAGACTGCAAGCGTTATTTCGGATTCACTGGGCGTAAAGGG  
TGCGCAGGCGGCCATGTGTGTTAGGCGTGAAAGCCCGAGGCTTAACCTCGGAATTGCACC  
TAAACTACATGGCTAGAGCATTTGGAGAGGGTAGTGGAATTCATGGTGTAGCAGTGAAAT  
GCGTAGATATCATGAGGAACACCAGTGGCGAAGGCGACTACCTGGACAATTGCTGACGCT  
CAGGCACGAAAGCGTGGGGAGCAAAGGGATTAGAAACCCCTGGTAGTCC  
>Otu6830  
CAGCCTATGGGGGGCAGCAGTGAGGAATCTTGGACAATGGGCGCAAGCCTGATCCAGCAA  
TGCCGCGTGGGTGATGAAGGCCTTCGGGTTGTAAAGCCCTTTCGGCGGGGAAGATGATGA  
CGGTACCCGCGAGAAGAAGCCCCGGCTAACTTCGTGCCAGCAGCCGCGGTAATACGAAGGG  
GGCTAGCGTTGTTTCGGAATTACTGGGCGTAAAGGGCGCGTAGGCTGTGCTGTAAGTCAGG  
CGTGAAAGGCCCCGGGCTCAGCCTGGGAAGTGCAGTTGATACTGCGGCGCTGGAAGGCGGG  
AGAGGATGGCGGAGTTCCAGTGTAGAGGTGAAATCTGTAGATATCTGGAAGAACACCGG  
TGCGAAGGCGAGCTTCTATCAGAGGACTGACGCTGAGGCGCGAAAGCGTGGGGAGCAAA  
CAGGATTAGAAACCCCGTAGTCC  
>Otu6835  
CCAGCCTACGGGGGGCTGCAGTGAGGAATATTGGTCAATGGGGGCAACCCTGAACCAGCC  
ATGCCGCGTGAAGGAAGACTGCCCTAAGGGTTGTAAACTTCTTTTGTACGGGGGTAATTT  
TCACCTTGCGAGGTGAATTGAAAGTACTGTACGAATAAGCATCGGCTAACTCCGTGCCAG  
CAGCCGCGGTAATACGGAGGATGCAAGCGTTATCCGGATTCATTGGGTTTAAAGGGTGCG  
TAGGCGGGTTTGTAAAGTCAGTGGTGAAAGACTGTCGCTTAACGATAGCATTGCCATTGAT  
ACTGCAGGTCTTGAGTATACTTGAGGTAGGCGGAATGTGTAGTGTAGCGGTGAAATGCTT  
AGATATTACACAGAACACCAATTGCGAAGGCAGCTTACTATGGTTTAAATTGACGCTGAGG  
CACGAAAGCGTGGGGATCAAACAGGATTAGATACCCAGTAGTCC  
>Otu6838  
CCAGCCTACGGGGTGACAGCAGTTAGGAATCGTCTACAATGCGCGCAAGCGTGATAGCGCG

AGCCAGAGTGCCTCTCATTGAGAGGCTTTTGCCAAATCTAAAAAGTTTGGCGAATAAGGA  
CTGGGTAAGACTAGTGCCAGCCGCCGCGGTAATCCTAGCGGTCCAAGTCGCAGCCAACAT  
TATTGGGTCTAAAACATCCGTAGCTTGCTTGATAAGTTCCCTGTGAAATCCTGCGTCCTA  
AATGCAGGGCGTGCAAGGAGTACTGTCAAGCTAGAGACTGGAAGACGTGGAGAGTACGTT  
CGAAGTAGTGGTAAAATACGTTAATCTCGGACGGACTTACAATAGCGTAGGCACTCTACG  
AGGACAGTTCTGACAGTGAGGGATGAAGGCTAGGGTCGCGAAAGGGATTAGATACCCGAG  
TAGTCC

>Otu6841

CCAGCCTACGGGGCGCTGCAGTCGAGAATTTTTTCACAATGGGCGCAAGCCTGATGGAGCG  
ACGCCGCGTGGGGGATGAATGGCTTCGGCCCGTAAACCCCTGTCATTCGTGATCAACGCG  
TTTGACCTAATACGTCAAACGTTGATAGTAACGGAAGAGGAAGGGACGGCTAACTCTGTG  
CCAGCAGCCGCGGTAATACAGAGGTCCCAAGCGTTGTTTCGGATTCACTGGGCGTAAAGGG  
TGCGTAGGCGGTTCGGGTAAGTCTGACGTGAAAGCCCGCAGCTCAACTGCGGAACGGCGTC  
GGATACTATTTCGGCTGGAGGGTGGGAAGGGGGACTGGAATTCTCGGTGTAGCAGTGAAAT  
GCGTAGATATCGAGAGGAACACCAGTGGCGAAGGCGAGTCCCTGGACCACTCCTGACGCT  
GAGGCACGAAAGCTAGGGGAGCAAACAGGATTAGAAACCCCTGTAGTCC

>Otu6843

CCAGCCTACGGGTTGCAGCAGCTAAGAATCTTCCGCAATGGGGGAAACCCCTGACGGAGCG  
ACGCCGCGTGGATGATGAAGGCCGTAAGGTTGTAAATCCTTTTGTGCGTGAAGAATAAG  
TGGAGGAGTGGAAAGCCTTCATGATGACGTAGCCGACGAATAAGCCCCGGCTAATTACG  
TGCCAGCAGCCGCGGTAATACGAGGGTGCAAGCGTTATCCGGATTCACTGGGTTTAAAG  
GGTGCGTAGGTGGGTCTGTAAGTCAGTGGTGAAATCCCCAAGCTTAACTTGGGAACCTGCC  
ATTGATACTATAGGTCTTGAATCATCTGGAGGTAAGCGGAATATGTCATGTAGCGGTGAA  
ATGCTTAGATATGACATAGAACACCAATTGCGAAGGCAGCTTACTACGGGTGTATTGACA  
CTGAGGCACGAAAGCGTGGGGATCAAACAGGATTAGATACCCTTGTAGTCC

>Otu6849

CCAGCCTACGGGAGGCAGCAGTGAGGAATATTGCGCAATGGGCGAAAGCCTGACGCAGCA  
ACGCCGCGTGAGCGATGAAGGCCCTTCGGGTGCTAAAGCTCTTTTCCAGGGGAAGAGGAAG  
GACGGTACCCTGGGAATAAGCCCCGGCTAACTACGTGCCAGCAGCCGCGGTAACACGTAG  
GGGGCAAGCGTTATTCGGATTACTGGGCGTAAAGCGCATGCAGGCGGTCTTGCAAGTCG  
GACGTTAAATCTCCCGGCTTAACTGGGAGGCGTCGTTGAAACTGCGAGACTTGAGGTTG  
GGAGAGGGAAGCGGAATTCCCGGTGTAGTGGTGGAATGCGTAGATATCGGGAGGAACACC  
TGTGGCGAAAGCGGCTTCCTGGCCTACACCTGACGCTAAGATGCGAAAGCGTGGGGAGCG  
AACAGGATTAGAAACCCTAGTAGTCC

>Otu6858

CCAGCCTATGGGATGCACCAGTCGAGAATATTCCACAATGGACGAAAGTCTGATGGAGCG  
ACGCCGCGTGACAGGATGAAGGCCCTTCGGGTGCTAAACTGCGGTAGTAAAGTAATAATGCA  
AATGAATGCTTTATGGAAAGAGGTTGGTAACTACGTGCCAGCACCCGCGGTAACACGTAG  
ACCTCAAGCGTTATCCGGATTACTGGGCGTAAAGAGCATGTAGGAGGTTTGGCGCGTCT  
TCTGTTAAAGCCCACCGCCCAACGGTGGAATGCAGGAGATACGGCGAGACTAGAGGATG  
TTAGAGGTACCAGGAACACACGGTGTAGGGGTGAAATCCGTTGATATCGTGTGGAACACC  
AAAGGCGAAGGCAAGGTACTGGGACGCTCCTGGCTCTGATATGCGAAAGCGTGGGGAGCA  
AAAAGGATTAGATACCCGAGTAGTCC

>Otu6859

CCAGCCTATGGGAGGCACCAGTTAGGAATCTTTTGCAATGCGCGCAAGCGTGACAAAGCG  
AGCCAGAGTGATTTTCAATTTGAAAATCTTTTGCCAAATGCAAAAAGTTTGGCGAATAAG  
GACTGGGCAAGACTAGTGCCAGCCGCCGCGGTAATCCTAGCGGTCCAAGTCGCAGCCATC  
ATTATTGGGTCTAAAACATCCGTAGCTTGCTGAATAAGTTTCCTGTGAAATCCGGCATCT  
TAAGTGTGCGGCGCGCAAGAAATACTATTGAGCTAGAGACTGGAAGACGTAAAAAGTACG  
TTTGAAGTAATGGTAAAATATGTTAATCTCAGACGGACTAACACAGCGAAGGCATTTTA  
CGAGGACAGTTCTGACAGTAAAGGATGAAGGCTAGGGGCGCAAAGTGGATTAGATACCCG  
AGTAGTCC

>Otu6862

CCAGCCTATGGGAGGCAGCAGTGGGGAATATTGGACAATGGGGGAAACCCCTGATCCAGCA  
ATGCCGCGTGTGTGATGAAGGCCCTGCGGGTTGTAAAGCACTTTCGGTGGGGAAGAAATAC  
TCAGGGCTAATAACTCTGAGGGTTGACGTTACCCAAAGAAGAAGCACCGGCTAACTCTGT  
GCCAGCAGCCGCGGTAATACAGAGGGTGCAAGCGTTAATCGGAGTTACTGGGCGTAAAGG  
GCGCGTAGGCGGATATTTAAGTCGGATGTGAAAGCCCTGGGCTCAACCTAGGAATTGCAT

TCGATACTGGGTATCTAGAGTATGGTAGAGGAAAGTGGAAATCCCCGGTGTAGCGGTGAAA  
TGCGTAGAGATCGGGAAGAACACCAAGGCGAAGGCAGCTTTCTGGACCAATACTGACGCT  
GAGGCGCGAAAGCGTGGGGAGCAAACAGGATTAGAAACCCGTGTAGTCC

>Otu6870

CCAGCCTACGGGTGGCAGCAGTGGGGAATATTGGACAATGGACGAAAGTTTGATCCAGTA  
ATAGTTCATGAGAGAGAAAAGGAAAGCAATAACGCTGTAAATCTCAGAAAACAAAAAAA  
TAATGATTGTATTTGTATTAAAGCACTGGCTAATTCTGTGCCAGCAGCCGCGGTAAGACAG  
GGAGTGCTGATGTTATCCGTTTTAATTGGGTGTAAAGGATATGTAGATGGCTTTGTTATG  
AAAATTTTATAAAAAGTTCTAAAAAAAATTTAGAAAAGATAAGATTTATTCAAAGCTTG  
AGTGTGTCCGATGTTAAAAGAATTTTTTTTGTAGGGGTAGAATCCTTAAATATTCAAAG  
ACTATCAAATAGTTGTGAAACCATTTTTTCAAAGGCACACTGACATTGAGATATGAAAGT  
ATAGGTATCGAACAGGATTAGAGACCCCAGTAGTCC

>Otu6871

CCAGCCTACGGGAGGCTCCAGTGGGGAATCTTGCGCAATGGGCGAAAGCCTGACGCAGCA  
ACGCCGCGTGGAGGAAGAAGGCCTTCGGGTGTAAACTCCTGTCAGGGGGAAAGAAGGCA  
CCTGGGTAAATAGCCCAAGGGCTGACGGTACCCCCAGAGGAAGCCACGGCTAACTACGTG  
CCAGCAGCCGCGTAATACGTAGGTGGCGAGCATTGTCCGGAATTATTGGGCGTAAAGAG  
CGCGTAGGCGGCTTGCCAGGTCCGATGTGAAATCTCAGGGCTCAACCCCTGAACGTGCATC  
GGAAACCGGCTTGCTAGAGTCTGGGAGAGGAGAGTGGAATCCTGGTGTAGCGGTGAAAT  
GCGCAGATATCAGGAGGAACACCAGTAGCGAAGGCGGCTCTCTGGAACAGTACTGACGCT  
GAGGCGCGAAAGCTAGGGGAGCAAACAGGATTAGAAACCCGAGTAGTCC

>Otu6874

CCAGCCTATGGGGTGCTCCAGTAGGGAATATTGCTTAATGGGCGAAAGCCTGAAGCAGCA  
ACGCCGCGTGTACGATGAAGGCCTTCGGGTGTAAACCTCTTTTATCAGGGAAGAATAAT  
GACGGTACCTGATGAATAAGTCACGGCTAACTACGTGCCAGCAGCTGCGGTAATACGTAG  
GTGGCGAGCGTTATCCGGATTCAATTGGGCGTAAAGAGCGCGTAGGTGGTCCTTCAAGTCA  
GATGTGAAATCTTCCGGCTTAACTGGAAGAGGCCATCTGATACTGCTGGACTTGAGGGCG  
GTAGAGGGAGGTGGAATTCCCCGTGTAGTGGTGAATGCGTAGATATCGGGAGGAACACC  
AGTGGCGAAAGCGGCCTCCTAGGCCGTTCTGACACTGAGGCGCGAAAGCGTGGGGAGCG  
AACAGGATTAGAAACCCCGTAGTCC

>Otu6876

CCAGCCTACGGGGGGCAGCAGCGACGAATCTTCCGCAATGGGCGAAAGCCTGACGGAGCG  
ATGCCGCGTGCGGGATGAAGCGGCTTTGCCGTGTAAACCGCTGTCAGGAGATACAAACAA  
TGATGATCTCCAGAGGAAGGGCCGGCTAACCCCTGTGCCAGCAGCCGCGGTAATACAGGG  
GCCCAGCGTTAGTCGGAATCACTGGGCTTAAAGGGTGCCTAGGCGGACTTATAAGTGTG  
GTGTGAAAGCCCACTGCTCAACGGTGGAATGCACGGCAAAGTGTAAAGTCTCGAGGAAGT  
TAGAGGTGCTAGAACGTTTGGTGGAGCGGTGGAATGCGTAGATATCAAACGGAATGCCG  
AAGGTGAAGACAGGCGACTAAGACTTTCTGACGCTGAGGCACGAAAGCGTGGGGAGCAA  
ACAGGATTAGAAACCCCTGTAGTCC

>Otu6880

CCAGCCTACGGGGGGCTCCAGTGACGAATATTCCGCAATGGGCGCAAGCCTGACGGAGCG  
ATGCCGCGTGTGGGACGAAGCCCCTCGGGGTGTAAACCACTGTCAGGGGTAGCAATAAA  
TTGAGCAACCCCCAAGGAAGAGGCGACTAACTCTGTGCCAGCAGTCGCGGTAATACAGAG  
GCCTCAAGCGTTAATCGGAATCACTGGGCTTAAAGGGTGCCTAGGCGGGCTTGCAAGTGC  
CTTGTGAAATCCCACGGCTCAACCGTGGAATTGCTCGGTAGACTGCGAGTCTTGAGGTG  
GTAGGGGCCGCTGGAACCTAGGTGGAGCGGTGAAATGCGTAGATATCTAGAGGAACGCC  
CAAGGCGAAGGCAGGCGGCTGGGCCGAATCTGACGCTGAGGCACGAAAGCGTGGGGAGCG  
AACGGGATTAGAGACCCCAGTAGTCC

>Otu6883

CCAGCCTACGGGAGGCAGCAGTTTGGAATATTCCACAATGGGCGAAAGCCTGATGGAGCG  
ACACCGCGTGGAGGATGAAGGTCCTCGGATTGTAAACTCCTTTAGACCTAGATGAAGGCA  
ACCGGGTGAATAATCCGTTGTTTGACAGTATAGGTAGAATAAGCCACGGCTAACTCTGT  
GCCAGCAGCCGCGGTAATACAGAGGTGGCGAACGTTGTCCGGATTTATTGGGTGTAAAG  
GCATGTAGGTGGTCTTGTAAGTCAAAGGTGAAATGGCCCCGGCTTAACCAGGTCATTGCC  
TTGAAACTGCAGGGCTTGAGTGCGGAAGAGGAGAGCGGAATCCCAGTGTAGCGGTGAAA  
TGCGTAGATATTGGGAGGAACACCGGTGGCGAAGGCGGCTCTCTGGTCCGATACTGACAC  
TGGGATGCGAAAGCCAGGGGAGCAAACGGGATTAGATACCCGCGTAGTCC

>Otu6885

CCAGCCTATGGGAGGCACCAGTAACGAATATTCCGCAATGGGCGAAAGCCTGACGGAGCG  
ACGCCGCGTGTGGGAATAAGTCTTTCGGGATGTAAACCACTGTCAGGGGCTGCCAAGCGA  
GCGGGGCCAATATCCCCGCAAGTTGAGGAGCCCCAGAGGAAGCCACGGCTAACTTCGTGC  
CAGCAGCCGCGGTAATACGAAGGTGGCGAGCGTTGTTTCGGAATCACTGGGCTTAAAGAGC  
ATGTAGGCGGCTCATCAAGCGTCTTGTGAAATCCCTCGGCTCAACCGAGGAATGGCTGGG  
CGAACTGATGGGCTTGAGGCAGGTAGGGGCGCGCGGAACCTTGGTGGAGCGGTGGAATG  
CGTAGATATCAAGAGGAACGCCGGTGGCGAAGGCGGCGCTGGGCTTGCCCTGACGCTG  
AGATGCGAAAGCCAGGGGAGCAAACGGGATTAGATACCCTGGTAGTCC

>Otu6886

CCAGCCTACGGGGGGCAGCAGTGGGGAATCTTGACACAATGGGGGCAACCCTGATCCAGCG  
ACGCCGCGTGAAGGATGAAGGTCTTCGGATTGTAAACTTCTTTTGGAGGGGATGAATGCC  
CTGGTGAATAGCCAGGGGTGACAGTACCCTCTGAATAAGCCACGGCTAACTACGTGCCAG  
CAGCCGCGGTAATACGTAGGTGGCAAGCGTTACTCGGAATCACTAGGCGTAAAGCGCAGG  
TAGGCGGTTTACGTAAAGTCTCTTGTGAAAGCTCCCGGCTCAACTGGGAGAGGCCAAGGGAA  
ACTACTGGGCTAGAGTGTGGTAGAGGAAGCTGGAATTCCCGGTGTAGCGGTGAAATGCGT  
AGAGATCGGGAGGAATACCTAAGGCGAAAGCAGGCTTCTGGGCCATCACTGACACTGATC  
TGCGAAAGCTAGGGGAGCAAATAGGATTAGAAACCCCTGTAGTCC

>Otu6887

CCAGCCTACGGGACGCTCCAGTGGGGAATATTGGGCAATGGGCGAAAGCCTGACCCAGCC  
ACGCCGCGTGAGTGATGAAGGCCTTCGGGTCGTAAAGCTCTGTGGGAGGGACGAATAAG  
CCGGCCAACAACCGGCCCTGACGGTACCTCCTTAGCAAGCACCGGCTAACCATGTGCCAG  
CAGCCGCGGTAATACATGGGGTGCAAACGTTGCTCGGAATTATTGGGCGTAAAGCGCGCG  
TAGGCGGTTACTTAAGTCGGATGTGAAATCCCTTGCTTAACTGAGGAAGTGCATCCGAG  
ACTGAGTAGCTAGAGTACGAAAGAGGGTCGCGGAATTCCCGGTGTAGAGGTGAAATTCGT  
AGATATCGGGAGGAACACCGGCGGCGAAGGCGGCGACCTGGTTCGAGACTGACGCTGAGG  
CGCGAAAGCGTGGGGAGCAAACAGGATTAGAAACCCGTGTAGTCC

>Otu6888

CCGCCTATGGGGGGCTGCAGTAGGGAATATTGGTAATGGGCGAAAGCCTGAACCAGCAAC  
GCCGCGTGAGCGATGACGGCCTTCGGGTTGTAAAGCTCTTTTGTAGAGGGAAGAGGAAGGA  
CGGTACCTCTAGAATAAGCCTCGGCTAACTACGTGCCAGCAGCCGCGGTAACCGTAGGA  
GGCAGCGTTATCCGGATTTACTGGGCGTAAAGCGCATGCAGGCGGTTTCGGAAGTTGGA  
TGTGAAAGCTCTCGGCTTAACTGGGAGAGGTCGTTCAATACTTCCGGACTAGAGGATGTG  
AGAGGAAAGTGGAATTCCGAGTGTAGTGGTGAATGCGTAGATATTCGGAGGAACACCAG  
TGCGGAAAGCGGCTTTCTGGCACATATCTGACGCTCATATGCGAAAGCTAGGGTAGCAAA  
CGGGATTAGATACCCGCGTAGTCC

>Otu6889

CCAGCCTACGGGAGGCTCCAGTGGGGAATTTTTCGCAATGGGCGAAAGCCTGACGCAGCA  
ATGCCGCGTGGGTGATGAAGGTCTTCGGATTGTAAACCCCTGTCGTCGGGGACGAAGGTT  
GGGGGGTTAACAGCCCTTTAGCTTGACGGTACCCGAGAGGAAGCCCCGGCTAACTCTGT  
GCCAGCAGCCGCGTAATACAGAGGGGGCAAGCGTTATTCGGAATTATTGGGCGTAAAGG  
GCGCGTAGGCGGTGATTCAAGTCGGATGTGCAATCCCCGAGCTCAACTTGGGAAGTGCAT  
CCGAGACTGGATCGCTGGAGTGTGGAGAGGGTGGTGGGAATTCCTCGTGTAGCGGTGAAA  
TGCGTAGAGATGAGGAGGAACACCAGTGGCGAAGGCGGCCACCTGGACAGTAAGTACGCG  
TGAGGCGCGAAAGTGTGGGTAGCAAACAGGATTAGAAACCCCTTGAGTCC

>Otu6891

CCAGCCTACGGGTGGCTCCAGTCGAGGATCTTCGGCAATGGGCGCAAGCCTGACCGAGCG  
ACGCCGCGTGTGTGACGAAGGCCTTCGGGTTGTAAAGCACTGTCGAGGGGGAGGAAGCG  
CAAGCTTGACCTATCCCTGGAGGAAGCACGGGCTAAGTTCGTGCCAGCAGCCGCGGTAAG  
ACGAACCGTGCAAACGTTGTTTCGGAATCACTGGGCTTAAAGGGCGCGTAGGCGGTTTGT  
AAGTCAGGGGTGAAATCTTTTCGGCTCAACCGGAAAGGTGCCCTTGATACTGACAGACTAG  
AGCGAGGTAGGGGCATGTGGAACCTTCTGGTGGAGCGGTGAAATGCGTTGATATCAGAAGG  
AACGCCGCTGGCGAAAGCGACGTGCTGGACCTCTTCTGACGCTGAGGCGCGAAAGCTAGG  
GTAGCAAACGGGATTAGATACCCTTGAGTCC

>Otu6893

CCGCCTATGGGGGGCAGCAGTAAGGGATATTGCGCAATGGGCGAAAGCCTGACGCAGCAA  
CGCCGCGTGGAGGAAGAAGGCCTTCGGGTTGTAAACTTCTTTTAGCAGGGACGAGGAAGG  
ACGGTACCTGCTGAATCAGTCACGGCTAACTACGTGCCAGCAGCCGCGGTAACCGTAGG  
TGGCAAGCGTTATCCGGATTTACTGGGCGTAAAGGGTGTGCAGGCGGGGATACAAGTGGT

GTATGAAATCTCCCAGCTTAACTGGGATAGGTTATGCCAGACTGTATTTCTAGAGGGCGA  
GAGAGGGGGGTGGAATTCGGGTGTAGTGGTGAAATGCGTAGAGATCCGGAGGAACCCCA  
GAGGCGAAGGCGGCCCCCTGGCTCGTACCTGACGCTCAGCCACGAAAGCATGGGGAGCGA  
ACGGGATTAGATACCCTAGTAGTCC

>Otu6897

CCAGCCTATGGGATGCACCAGTAGGGAATATTGGGCAATGGGCGAAAGCCTGACCCAGCA  
ACGCCGCGTGACAGATGAAGGTCTTCGGATCGTAAAGTGCTTTTCTGAGAGATGAGAAAG  
GACAGTATCTCAGGAATAAGTCTCGGCTAACTACGTGCCAGCAGCCGCGGTAACACGTAG  
GAGGCGAGCGTTATCCGGATTTACTGGGCGTAAAGCGTATGCAGGCGGTTTGGTAAGTTG  
GATGTGAAAGCTCCTGGCTTAACTGGGAGAGGTCGTTCAATACTACCAGGCTAGAGGATG  
GGAGAGGGAGGTGGAATTCCGGGTGTAGTGGTGAAATGCGTAGATATCCGGAGGAACACC  
AGTGCGCAAAGCGGCCTCCTGGCCATTTCTGACACTGATACGCGAAAGCTAAGGTAGCA  
AACGGGATTAGATACCCTCGTAGTCC

>Otu6899

CCAGCCTATGGGACGCAGCAGTGAGGAACATTGGTCAATAGGGGGAACCCTGAACCAGCC  
ATGCCGCGTGAAAGGAAGACTGCCCTAAGGGTTGTAAACTTCTTTTGTATGGGAGTAAAGT  
CATTTACGAGTAAGTGATTGAAAGTACTGTACGAATAAGCGTCGGCTAACTCCGTGCCAG  
CAGCCGCGGTAATACGGAGGATGCGAGCGTTATCCGGATTTATTGGGTTTAAAGGGTGCG  
TAGGCGGGTTAGTAAGTCAGTGGTGAAAGACTGTCGCTTAACGATAGCATTGCCATAGAT  
ACTGCTGATCTTGAGTACAGTTGAGGTAGGCGGAATGTGTAGTGTAGCGGTGAAATGCTT  
AGATATTACACAGAACACCAATTGCGAAGGCAGCTTACCAGAGTGTAAGTACGCTGAGG  
CACGAAAGCGTGGGGATCAAACAGGATTAGAGACCCCTGTAGTCC

>Otu6902

CCAGCCTATGGGGGGCTCCAGTCGAGAGGCTTTGTCAATGGGGGAAACCCTGAACAAGCG  
ACGCCGCGTGCGCGATGAAGGCCCTTCGGGTGTAAAGCGCTGTGAGGGGGAGGAAGACC  
GCAAGGTTTGACCTATCCCTGGAGGAAGCACGGGCTAAGTTCGTGCCAGCAGCCGCGGTA  
AGACGAACCGTGCAAACGTTGTTTCGGAATCACTGGGCTTAAAGGGCGCGTAGGCGGGCCT  
CCCAGTCCGGGGTGAAAGCTTTTCGGCTTAACCGGAAAAGTGCCTTGGAATACTGGAGGTCT  
GGAGGGAGGTAGGGGCAGCTGGAACCTCCGGTGGAGCGGTGAAATGCGTTGATATCGGAA  
GGAACGCCGCTGGCGAAAGCGAGCTGCTGGATCTCTACTGACGCTGAGGCGCGAAAGCCA  
GGGAGCGAACGGGATTAGAAACCCCACTAGTCC

>Otu6904

CCAGCCTACGGGGTGACACCAGTGGGGAATATTCCGCAATGGGCGAAAGCCTGACGGAGCG  
ACGCCGCGTGATGATGAAGGTCTTCGGATCGTAAAGTCCTGTAGAGGGGGAAGATGGGT  
GCAGCAATGCATCTGACAGTACTCCTAAAGTAAGCTACGGCAAACCTCTGTGCCAGCAGCC  
GCGGTTATACAGAGGTAGCAAGCGTTGTTTCGGAATGACTGGGTGTAAAGCGCGTGTAGGT  
GGTTTAGTAAGTTGAATGTGAAATCCCTTGGCTTAACCAAGGAACTGCATTCAAACTAC  
TTTACTTGAGTACGGGAGAGGAAAGTGGAATTTCTGGTGTAGCGGTAAAATGCGTAGATA  
TCAGAAGGAACACCGGTGGCGAAGGCGACTTTCTGGTCCGTAAGTACACTGAGACGCGA  
AAGCTAGGGGAGCAAACAGGATTAGAGACCCCCGTAGTCC

>Otu6907

CCAGCCTATGGGGGGCACCAGTCGAGAATTTTTTCACAATGGGCGAAAGCCTGATGGAGCG  
ACGCCGCGTGGGGGATGAATGGCTTCGGCCCGTAAACCCCTGTCATTTGCGAACAAATTG  
GTTCTATTAAACACCTGAACCATTTGATAGTAGCGGAAGAGGAAGGGACGGCTAACTCTGTG  
CCAGCAGCCGCGTAATACAGAGGTCCCAAGCGTTGTTTCGATTCACTGGGCGTAAAGGG  
TGCGTAGGTGGTTCGGGTAAGTCTGACGTGAAATCTCCAAGCTCAACTTGAAACTGCGTT  
GGATACTACTCGGCTTGAGGAATGGAGGGGAGACTGGAATACTTGGTGTAGCAGTGAAAT  
GCGTAGATATCAAGTGGAACACCAGTGGCGAAGGCGAGTCTCTGGACATTTCTTGACGCT  
GAGGCACGAAAGCCAGGGGAGCAAACAGGATTAGATACCCTTGTAGTCC

>Otu6911

CCAGCCTATGGGGTGCTCCAGTAGGGAATTTTCCGCAATGGGCGAAAGCCTGACGGAGCG  
ACGCCGCGTGGGTGAAGACGGCCTTTGGGTGTAAAGCCCTGCTCATCGGGAAGAAGAAA  
TGACGGTACTGGTGAAGAAAGCCCCGGCTAACTACGTGCCAGCAGCCGCGGTAATACGTA  
GGGGGCGAGCATTTGTCCGGGATGATTGGGCGTAAAGGGCGTGTAGGCGGATGCATAAGTC  
GGGCGTGAAAAGCGCGGGCTCAACTCGTGTAAGCGTTTCGAAACGGTGCATCTTGAGTGCA  
GTAGAGGGAAGCGGAATTTCTGGTGTAGCGGTGGAATGCGTAGATATCAGAAGGAACACC  
GGTGCGAAGGCGGCTTCCTGGACTGCTACTGACGCTGAGGCGCGAAGGCGTGGGGAGCA  
AACAGGATTAGATACCCTGTAGTCC



>Otu6912

CCAGCCTATGGGAGGCTGCAGTAAGGAATATTGGACAATGGCCGCAAGGCTGATCCAGCC  
ATGCCGCGTGCAGGAAGAAGGACCTATGGTTTCGTAAACTGCTTTTGTAAACAGAGAAAACC  
CTCGTACGTGTACGGGGCTGATAGTATGTTAAGAATAAGCATCGGCTAACTTCGTGCCAG  
CAGCCGCGGTGAGACGAAGGATGCAAGCGTTATCCGGATTCATTGGGTTTAAAGGGAGCG  
TAGGCGGATAAAATAAGTCAGTGGTGAAATCTCTGGGCTTAACCCAGAACTGCCATTGAT  
ACTGTTTATCTAGAGTACAGTTGCCGTTGGCGGAATATGACATGTAGTGGTGAAATACTT  
AGATATGTCATAGAACACCGATTGCGAAGGCAGCTAACGAACTGTAACTGACGCTGAGG  
CTCGAAAGTGCGGGGATCAAACAGGATTAGATACCCTAGTAGTCC

>Otu6914

CCAGCCTACGGGTTCAGCAGTAAGGAATATTGGACAATGCCCCGGAAGGGTGATCCAGCC  
ATGCCGCGTGCAGGAAGAAGGTCCTATGGATTGTAAACTGCTTTTACACCGGAGAAAACC  
CCCCTTTTCGAAGGGGGCTGATAGTATGGTGAGAATAAGCATCGGCTAACTTCGTGCCAG  
CAGCCGCGGTGAGACGAAGGATGCAAGCGTTATCCGGATTCATTGGGTTTAAAGGGAGCG  
TAGGCGGCTTTATAAGTCAGTGGTGAAATCTCCTTGCTTAACGAGGATATTGCCATTGAT  
ACTGTAGAGCTTGAGTACAGATGCCGTTGGCGGAATATGACATGTAGTGGTGAAATACAT  
AGAGATGTCATAGAACACCGATTGCGAAGGCAGCTGACGAACTGTAACTGACGCTGAGG  
CTCGAAAGTGCGGGGATCAAACAGGATTAGATACCCGCGTAGTCC

>Otu6919

CCAGCCTACGGGAGGCACCAAGTGGGGAATTTTGGACAATGGGAGCAACCCTGATCCAGCC  
ATGCCGCGTGCAGGAAGAAGGCCTTCGGGTGTAAACCGCTTTTATTTGGGAAGAAGGAG  
TCGTGGTTAATACCTGCGATGACAGACGGTACCGGATGAATAAGCACCGGCTAACTACGT  
GCCAGCAGCCGCGTAATACGTAGGGTGCGAGCGTTAATCGGAATTACTGGGCGTAAAGC  
GTGCGCAGGCGGTTCTGAAAGTCAGCTGTGAAAGCCCCGGGCTTAACCTGGGAATGGCGG  
TTGAAACTACAGGACTAGAATCTGGCAGAGGGGGGTGGAATTCACAGTGTAGCAGTGAAA  
TGCGTAGAGATGTGGAGGAACACCGATGGCGAAGGCAGCCCCCTGGGCTGAGATTGACGC  
TCAGGCACGAAAGCGTGGGGAGCAAACAGGATTAGAGACCCCTGTAGTCC

>Otu6920

CCAGCCTACGGGGGGCTCCAGTGGGGAATTTTCCGCAATGGGCGAAAGCCTGACGGAGCA  
ACGCCGCGTGGATGATGAAGTCTTTCGGGACGTAAATCCTTTCAGCAGGGACGAAGCGA  
GTGACGGTACCTGCAGAAGAAGCATCGGCTAACTACGTGCCAGCAGCCGCGTAATACGT  
AGGATGCGAGCGTTGTCCGGAATTATTGGGCGTAAAGAGAACGTAGGCGGTTTCTTAAGT  
TTGGTCTTAAAGACCGGGGCTTAACCTCCGGAATGGATCGAAAACCTGGGAGACTGGAGGA  
CGTCAGAGGAAAGTGAATTCGAGTGTAGCGGTGAAATGCGTAGATATTCGGAGGAACA  
CCAGTGGCGAAAGCGACTTTCTGGGACGTTCTTGACGCTGAGGTTTCGAAAGCTCGGGGAG  
CAAACAGGATTAGAGACCCCACTAGTCC

>Otu6929

CCAGCCTATGGGGGGCAGCAGTAGGGAATCTTCCGCAATGGGCGAAAGCCTGACGGAGCA  
ATGCCGCGTGAACGATGAAGGCCTTCGGGTCGTAAAGTCTGTGTGGGGGAAGAAATCC  
TATACGGATAATACCCGTGTAGTTTGACGGTACTCCACGAGGAAGCCCCGGCTAATTAC  
GTGCCAGCAGCCGCGTAATACGTAAGGGGCAAGCGTTGTCCGGAATCACTGGGCGTAAA  
GCGCACGTAGGCGGTTTAGCGAGTTGGGGGTGTAAGCTCTAGGCTTAACCTAGAAATTGC  
CTCCAAAACCTACTTCACTTGAGTATTAGAGGGGAAGCTGGAATTCACGGTGTAGCGGTGA  
AATGCGTAGATATCGTGGAGAACACCCGTGGCGAAGGCGGGCTTCTGGCTAATGACTGAC  
GCTGAGGTGCGAAAGCTAGGGGAGCGAACGGGATTAGAAACCCCGTAGTCC

>Otu6930

CCAGCCTACGGGTTCGAGCAGTGGGGAATATTGGACAATGGGGGCAACCCTGATCCAGCG  
ATGCCGCGTGAGTGAAGAAGGCCCTCGGGTCGTAAAGTCTTTAGGCCGGGACGAAGTGC  
GGAAGTTTAAGAGATGTCCGTGTTGACGGTACCGGCAGAATAAGCACCGGCAAACCTCTGT  
GCCAGCAGCCGCGTAATACAGAGGGTGCGAGCGTTAATCGGAATTACTGGGCGTAAAGG  
GCGCGTAGGCGGTTGTGCGAGTGTGGTGTGAAAGCCCCGGGCTTAACCTGGGAAGCGCAT  
CGCAAACGGCATGACTAGAGTAGATGAGAGGGTGGCGGAATTTCCGGTGTAGCGGTGAAA  
TGCGTAGAGATCGGAAGGAACGTCAATGGCGAAGGCAGCCACCTGGCATCATACTGACGC  
TGAGGCGCGAAAGCGTGGGGAGCGAACAGGATTAGAAACCCGAGTAGTCC

>Otu6934

CCAGCCTATGGGGTGCTCCAGTGGGGAATATTGCACAATGGACGAAAGTCTGATGCAGCG  
ACGCCGCGTGGAGGATGAAGGTTTTTCGGATTGTAAACTCCTGTTGAGTGGGAAGAAAGGC  
GACGACCTAATACGTCGTTGAGATGACGGTACCACTATAGAAAGCACCGGCAAACCTTCGT

GCCAGCAGCCACGGTAATACGAAGGGTGCAAGCGTTATTCGGAGTTACTGGGCGTAAAGA  
GCGCGTAGGCGGTTTTTTAAGTCATTTGTTAAATCTCCCGGCTTAACCGGGAACATGCAC  
GTGAAACTGGAAGACTAGAGTGTAAGAGAGAGAAGTGGAATTCTCGGAGTAGCGGTAAAA  
TGCGTAGATCTCGAGAGGAACACCGGAGGCGAAGGCGGCTTCTTGGCTTACAACCTGGCGC  
TCAAGTGCGAAAGCGTGGGGAGCAAACAGGATTAGATACCCTTGTAGTCC

>Otu6937

CCAGCCTATGGGGGGCACCAGTGGGGAATATTGGACAATGGGGGCAACCCTGATCCAGCG  
ATGCCGCGTGTGTGAAGAAGGCCTGCGGGTTGTAAAGCACTTTCGGTGGTGAGGAGGGTT  
GAGTGGATGAATAAGCCACTTGACTGACGCTAGCCACAAAAGAAGCACCGGCTAACTCTG  
TGCCAGCAGCCGCGGTAATACAGAGGGTGCGAGCGTTAATCGGAATTATTGGGCGTAAAG  
GGCGCGTAGGTGGATAAATAAGTTAGATGTGAAAGCCCTGGGCTTAACCTAGGAACGGCA  
TCTGATACTGCTTGTCTGGAGTGGAGTAGAGGGTAGCGGAATTTCCGGTGTAGCGGTGAA  
ATGCGTAGATATCGGAAAGAACACCAGTGGCGAAGGCGGCTACCTGGGCTCACACTGACA  
CTGAGGCGCGAAAGCGTGGGGAGCGAACAGGATTAGAGACCCGCGTAGTCC

>Otu6938

CCAGCCTACGGGTGGCAGCAGTAGGGAATTTTCCACAATGGACGAAAGTCCGATGGAGCA  
ACGCCGCGTGCAGGATGAAGGCCTTAGGGTTGTAAACTGCTTTTATTTGTGACGAATATG  
ACGGTAGCAAATGAATAAGGATCGGCTAACTCCGTGCCAGCAGCCGCGGTCATACGGAGG  
ATCCAAGCGTTATCCGGAATTACTGGGCGTAAAGAGTTGCGTAGGTGGCATTGTAAGTCC  
CGATATAAAGACAACGGCTCAACCGTTGGAATCATCGGGAACTGCAAAGCTAGAGGACG  
AGAGAGGTTATTGGAATTCCTAGTGTAGGAGTGAATCCGTAGATATTAGGAGGAACACC  
GATGGCGTAGGCAGATAACTGGCTCGTTCCTGACACTGAGGCACGAAAGCGTGGGTAGCA  
AACGGGATTAGAAACCCGTGTAGTCC

>Otu6939

CCAGCCTACGGGAGGCAGCAGCCGAGAATATTCGACAATGGGCGAAAGCCTGATCGAGCG  
ACGCCGCGTGCAGGATGAAGTACTTCGGTACGTAAACTGCTTTTTCGGGACTAAGAAGTTT  
ATTGACTAGTCCGAGAATAAGAGGTTGCTAAACTCGTGCCAGCAGCAGCGGTAATACGAG  
TGCTTCGAGCGTTATCCGGAATCATTGGGCGTAAAGGGTGTGTAGGCGGTCGTGTTAGTC  
TCTCGTTAAATTTCTTCGGCTCAACCGGGGGCTTGCGGGGGAAACGGCACGACTAGAGGGT  
GCGAGAGGTGAATGGAACCTCATGGTGTAGGGGTGAAATCCGTTGATATCATGGGGAACAC  
CAAAGCGAAGGCAATTCCTGAGCGTCAAACACGAAAGCGTGGGTAGC  
GAATGGGATTAGATACCCTGGTAGTCC

>Otu6945

CCAGCCTATGGGTCGCAGCAGTAGGGAATATTGGTCAATGGGCGCAAGCCTGAACCAGCC  
ATGCCGCGTGCAGGATGAAGGCCCTACGGGTCGTAAACTGCTTTTGTACGGGAAGAAAAC  
TCTCTACGTGTAGAGGGCTGACGGTACCGTGAGAATAAGGATCGGCTAACTTCGTGCCAG  
CAGCCGCGGTAATACGAAGGATCCTAGCGTTGTCCGATTACTGGGTTTAAAGGGTGCG  
TAGGCGGACTATTAAGTCAGTGGTGAAGCCGGTAGCTTAACCTATCGAATTGCCATTGAA  
ACTGATAGTCTCGAGTATAGTTGAGGTAGTTGGAATGTATCATGTAGCGGTGAAATGCTT  
AGATATGATACAGAACACCGATTGCGAAGGCAGATTACTAACTATAACTGACGCTGAGG  
CACGAAAGTGTGGGGATCAAACAGGATTAGAGACCCGCGTAGTCC

>Otu6947

CCAGCCTACGGGTCGCTGCAGTCGAGAATTTTTTACAATGGGGGAAACCCTGATGGAGCG  
ACGCCGCGTGGGGGATGAATGGCTTCGGCCCGTAAACCCCTGTCATTTGCGAACAACCTT  
TTTACCTAACACGTGGAGAATTGATTGTAGCGGAAGAGGAAGGGACGGCTAACTCTGTG  
CCAGCAGCCGCGGTAATACAGAGGTCCCAAGCGTTGTTTCGATTCACTGGGCGTAAAGGG  
TGCGTAGGTGGCCGGGTAAAGTCTAATGTGAAAGCTCGGAGCTCAACTCCGAAACGGCATT  
GGATACTATCCGGCTGGAGGGTCGGAGGGGGGACTGGAATTCCTCGGTGTAGCAGTGAAAT  
GCGTAGATATCAAGTGGAACATCAGTGGCGAAGGCGAGTCTCTGGACAATTCCTGACACT  
GAGGCACGAAAGCTAGGGGAGCAAACGGGATTAGAAACCCCAGTAGTCC

>Otu6949

CCAGCCTACGGGACGCTGCAGCCGAGAATATTCGACAATGGACGAAAGTCTGATCGAGCG  
ACGCCGCGTGCAGGATGAAGTCCTTCGGGATGTAAACTGCTCTTGCGAGAGAGAAAGTTT  
ATTGATCATCTCGCAATAAGAGGTTGCTAAACTCGTGCCAGCAGCAGCGGTAATACGAG  
TGCTTCAAGCGTTATCCGGGATTATTGGGCGTAAAGGGTGTGTAGGTGGTTATGTTAGTC  
CTTCGTAAATTTCTCTGGCTCAACCAGAGTTTCGCGCGGGATACGGCATGACTTGAGGGTG  
TGAGAGGTCTGTGGAACCATAGTGTAGCGGTGAAATGCGTTGATATTATGGGGAACACC  
AAAAGCGAAGGCAACAGACTGGAACATTCTGACACTGAGACACGAAAGCGTAGGTAGCG

AATGGGATTAGAAACCCGCGTAGTCC

>Otu6950

CCAGCCTACGGGACGCAGCAGTCGAGAATATTTTCGCAATGGGCGCAAGCCTGACGAAGCG  
ACGCCGTGTGAGTGAAGAAGGCCTTCGGGTCGTAAAGCTCTTTTCGCCTGGGAACAAGAGA  
AATCGGATAATATCCGACGTATTTGAGGGTACTAGGTAAAGAAGCACCGGCTAACTCCGT  
GCCAGCAGCTGCGGTAATACGGAGGGTGCAAGCATTAAATCGGATTTATTGGGCGTAAAGG  
GGGCGTAGGCGGAAATGAAAGCCAGATGTGAAATCCCGGGGCTCAACCCAGGAACAGCAT  
TTGAAACTCCTTTTCTAGAGGATAGGCGGAGAAAACGGAATTCACATGTAGCGGTGAAA  
TGCGTAGATATGTGGAAGAACACCGGTGGCGAAGGCGGTTTTCTAGCTTATTCCTGACGC  
TGAGGCCCGAAAGCTAGGGGAGCAAACAGGATTAGAAACCCCTGTAGTCC

>Otu6954

CCAGCCTACGGGGTGCTGCAGTCGAGAATCATTCGCAATGGGCGAAAGCCTGACGATGCG  
ACGCCGTGTGAGCGAAGAAGGCCTTAGGGTCGTAAAGCTCTTTTCGCCTGGGAACAAGAGA  
AGTTGACTAATAATCAGCTAATTTGAGAGTACTAGGTAAAGAAGCACCGGCTAACTCCGT  
GCCAGCAGCTGCGGTAATACGGAGGGTGCAAGCATTAAATCGGATTTATTGGGCGTAAAGG  
GCGTGTAGGCGGGGATAATAGTCAGATGTGAAACCCTGGGGCTCAACCTCAGAACTGCAT  
TTGAAACTGTATCTCTAGAGGATAGGCGGAGAAAACGGAATTCACAAGTAGCGGTGAAA  
TGCGTAGATATGTGGAAGAACACCGGTGGCGAAGGCGGTTTTCTAGCTTATTCCTGACGC  
TGAGGCGCGAAAGCAAGGGGATTAAACAGGATTAGAACCCCCGTAGTCC

>Otu6955

CCAGCCTACGGGGCGCAGCAGTGGGGAATATTGCACAATGGGCGGAAGCCTGATGCAGCG  
ACGCCGCGTGAGGGATGAAGGCCTTCGGGTGTAAACCTCTTTTCAGCACCGACGAATTTG  
ACGGTAGGTGCAGAAGAAGCGCCGGCTAACTACGTGCCAGCAGCCGCGGTAATACGTAGG  
GCGCAAGCGTTGTCCGATTTATTGGGCGTAAAGAGCTCGTAGGCGGCTTGTGCGGTCGG  
ACGTGAAAGCTCACAGCTTAACTGTGGGTCTGCGTCCGATACGGGCAGGCTAGAGGCAGG  
TAGGGGAGAACGGAATTCCTGGTGTAGCGGTGAAATGCGCAGATATCGGGAGGAACACCG  
GTGGCGAAGGCGGTTCTCTGGGCTGTACTGACGCTGAGGAGCGAAAGCGTGGGGAGCGA  
ACAGGATTAGATACCCCCGTAGTCC

>Otu6958

CCAGCCTACGGGTCGCAGCAGCCGAGAATATTCGACAATGGGCGAGAGCCTGATCGAGCG  
ATACCGCGTGGTGGATGAAGCGCTTCGGCGCGTAAACATCTTTTATGAGGGAGGAAGTTA  
TTGACGTTACCTCATGAATAAGGGGCTCCTAACTCTGTGCCAGCAGGAGCGGTAATACAG  
AGGCCCCGAGCGTTACCCGGAATTACTGGGCGTAAAGAGTGCGTAGGTGGTCGTGTTAGT  
CGTTTGTTAAAGCTCCCGGCTCAACCGGGAACATGTGGGCGAAACGGCACGACTTGAGGG  
CGTGAGAGGTGCATAGAACTCTAGGTGTAGGGGTGAAATCCGTTGATATCTAGGGGAATA  
CCGAAAGCGAGGGCAGTGCCTGGCGGTTCTGACACTCAAGCACGAAAGCGTGGGTAG  
CGAACGGGATTAGATACCCTAGTAGTCC

>Otu6962

CCAGCCTACGGGGGGCTCCAGTCGAGGATCTTCGGCAATGGGCGCAAGCCTGACCGAGCG  
ACGCCGCGTGTGCGATGAAGGCCTTCGGGTGTAAAGCACTGTGAGGGGGAGGAAAGCC  
GCAAGGTCTGACCTATCCCTGGAGGAAGCACGGGCTAAGTTCGTGCCAGCAGCCGCGGTA  
AGACGAACCGTGCAACGTTGTTTCGGAATCACTGGGCTTAAAGGGCGCGTAGGCGGTGCA  
CCAAGTCTGGGGTGAAATCTTTTCGGCTTAAACGGAAAAGTGCCTTGGAATCTGGTTCGGCT  
GGAGGGAGGTAGGGGCAGCTGGAACCTCCAGTGGAGCGGCGAAATGCGTTGATATTGGAA  
GGAACGCCGAGGCGAAAGCGGGCTGCTGGACCTTCTCTGACGCTGAGGCGCGAAAGCTA  
GGGTAGCAAAAAGGATTAGATACCCTGGTAGTCC

>Otu6963

CCAGCCTATGGGATGCTGCAGTGGGGAATATTGGGCAATGGGCGCAAGCCTGACCCAGCC  
ACGCCGCGTGAGTGATGAAGGCCTTCGGGTCGTAAAGCTCTGTGGGGAGGGACGAATAAG  
CACCGTGCTAACATCACGGGGCCCTGACGGTACCTCCTTAGCAAGCACCGGCTAACCATG  
TGCCAGCAGCCGCGGTAATACATGGGGTGCAAACGTTGCTCGGAATTATTGGGCGTAAAG  
CGCACGTAGGTGGTTTGTATGTGCGATGTGAAAGCCCTCGGCTCAACTGAGGAAGTGCA  
TCCGAGACTGGCAAGCTAGAGTATGTAAGAGGGTTCGCGGAATTCCCGGTGTAGAGGTGAA  
ATTCGTAGATATCGGGAGGAACACCGGTGGCGAAGGCGGCGACCTGGGACAACACTGACA  
CTGAGGTGCGAAAGCGTGGGGAGCAAACAGGATTAGAAACCCGAGTAGTCC

>Otu6969

CCAGCCTATGGGGTGACAGCAGTCGAGAATATTCGACAATGGGCGAAAGCCTGATCGAGCG  
ACACCGCGTGACAGGATGAAGGCCTTCGGGTCGTAAACTGCGGTAATAAAGTAACAATGCA

AATGAGTGCTTTATGGAAAGAGGCGGGTAACTACGTGCCAGCACCAGCGGTAATACGTAG  
GCCCTCAAGCGTTATCCGGATTTATTGGGCGTAAAGGGCATGTAGGAGGTTTTGCGCGTCT  
TTTGTTAAAGCCCGGGGCGCTAACCCCGGAGATGCAGGAGATACGGCATGACTAGAGGGGG  
TTAGAGGTGCATGGAAGTACCGGTGTAGGGGTGAAATCCGTTGATATCGTGGGGAACACC  
AAAGGCGAAGGCAGTGCAGTGGGGCCCTCCTGACTCTGATATGCGAAAGCGTGGGGAGCA  
AAAAGGATTAGATAACCCCGTAGTCC

>Otu6970

CCAGCCTATGGGGGCGAGCAGTGGGGAATTTTGGACAATGGGGGCAACCCTGATCCAGCC  
ATGCCGCGTGAGTGAAGAAGGCCTTCGGGTGTAAAGCTCTTTCGGTAGGAACGAAACGG  
TTACGGTTAATAACCCGTGACTACTGACGGTACTTACAGAAGAAGCACCGGCTAACTACGT  
GCCAGCAGCCGCGTAATACGTAGGGTGCAGCGTTAATCGGAATTACTGGGCGTAAAGC  
GTGCGCAGGCGGTCTCGTAAGCTGGGTGTGAAAGCCCCGGGCTTAACCTGGGAATGGCAT  
TCAGGACTGCGAGGCTCGAGTGTGGCAGAGGGAGGTGGAATTCACGTGTAGCAGTGAAA  
TGCGTAGAGATGTGGAGGAACACCGATGGCGAAGGCAGCCTCCTGGGCCAGCACTGACGC  
TCATGCACGAAAGCGTGGGGAGCAAACAGGATTAGATAACCCCGTAGTCC

>Otu6971

CCAGCCTATGGGAGGCCACCAGTAAGGAATATTGCTCAATGGGCGCAAGCCTGAAGCAGCA  
ACGCCGCGTGACAGATGAAGGCCTTCGGGTGTAAAGTGCTTTTACGGGAGATGAGGAAG  
GACAGTATCCCTGGAATAAGGTACGGCTAACTACGTGCCAGCAGCCGCGGTAAACGTAG  
GTACCGAGCGTTATCCGGATTCACTGGGCGTAAAGCGCGTGACAGGTGGTTTGGTAAGTCG  
GGCATGAAAACCTCTTGGCTCAACTGAGAGACGCTGTCCGATACTGTGCAACTTGAGGGTG  
TGAGAGGGAGGTGGAATTCGCGATGTAGTGGTGAAATGCGTAGATATGCGGAGGAACACC  
AGTGCGCAAGGCGGCCTCCTGGCACACTCCTGACACTCATACGCGAAAGCTAGGGGAGCG  
AACGGGATTAGAGACCCTCGTAGTCC

>Otu6972

CCAGCCTACGGGTTGCTGCAGTGGGGAATATTGGACAATGGGGGCAACCCTGATCCAGCC  
ATGCCGCGTGAAATGATGAAGGCCTTCGGGTGTAAAGTTCTTTTGACGGGGACGATGATG  
ACGGTACCCGCGAGAATAAGCCCCGGCTAACTTCGTGCCAGCAGCCGCGGTAAAGACGAAGG  
GGGCTAGCGTTGTTTCGGAATTACTGGGCGTAAAGCGCGTGATAGGCGGTTATCCAAGTCGG  
GTGTGAAAGCCTTGAGCTTAACTCAAGAAATGCACTCGGTACTGGGTGACTAGAGGACCG  
GAGAGGATAGTAGAATTCACAGTGTAGTGGTGAAATACGTAGAGATTGGGAAGAACACCA  
GTGGCGAAGGCGGCTATCTGGACGGTTTCTGACGCTAAGACGCGAAAGCGTGGGGAGCAA  
ACAGGATTAGAAACCCTAGTAGTCC

>Otu6974

CCAGCCTATGGGGGGCTCCAGCCGAGAATATTTCGACAATGGGCGAAAGCCTGATCGAGCG  
ATACCGCGTGGTGGATGAAGTGCTTCGGCACGTAAACATCTTTTATGAGGGAGGAAGTTA  
TTGACGTTACCTCATGAATAAGGGGCTCCTAACTCTGTGCCAGCAGGAGCGGTAATACAG  
AGGCCCCGAGCGTTACCCGGAATTACTGGGCGTAAAGAGTGCGTAGGTGGTTGTATTAGT  
CGTCTGTCAAATCTCCCGGCTCAACCGGGAACCGCGGGCGAAACGGTACAACCTCGAGGG  
AGTGAGAGGTGAATGGAAGTCACTGGTGTAGGGGTGAAATCCGTTGATATCATGGGGAACA  
CCGAAAGCGAAGGCAATTCAGTGGCACTTTCCTGACACTCAAGTACGAAAGCGTGGGTAG  
CGAACGGGATTAGAGACCCCGTAGTCC

>Otu6976

CCAGCCTACGGGGGGCGAGCAGTGGGGAATATTGGACAATGGGGGAAACCCTGATCCAGCA  
ATGCCACGTGTGTGAAGAAGGTCTTCGGATTGTAAAGCTCTTTCACCCACGACGATAATG  
ACGGTAGTGGGAGAAGAAGCCCCGGCTAACTTCGTGCCAGCAGCCGCGGTAATACGAAGG  
GGGCTAGCGTTGTTTCGGAATTACTGGGCGTAAAGCGCGTGATAGGCGGGTCCTTAAGTCAG  
GGGTGAAATGCCAAGGCTCAACCTTGGAAGTGCCTTTGATACTGGGGATCTTGAGTCCGG  
GAGAGGTGAGTGGAAGTGCAGTGTAGAGGTGAAATTCGTAGATATTGCAAGAACACCA  
GTGGCGAAGGCGGCTCACTGGCCCGGAAGTACGCTGAGACGCGAAAGCGTGGGGAGCAA  
ACAGGATTAGATAACCCCTGTAGTCC

>Otu6984

CCAGCCTACGGGTCGCAGCAGTGGGGAATATTGGACAATGGGCGCAAGCCTGATCCAGCC  
ATGCCGCGTGAGTGACGAAGGCCTTAGGGTTGTAAAGCTCTTTTGGCGGGGAAGATAATG  
ACGGTACCCGCGAGAATAAGCTCCGGCTAACTTCGTGCCAGCAGCCGCGGTAATACGAAGG  
GAGCTAGCGTTGTTTCGGAATCACTGGGCGTAGAGCGCACGTAGGCGGATGTGTCAAGTCAG  
GGGTGAAATCCCGGAGCTCAACTTCGGAAGTGCCTTTGATACAGCACGTCTTGAGTCCGA  
TAGAGGTGGGTGGAATTCCTAGTGTAGAGGTGAAATTCGTAGATATTAGGAAGAACACCG

GTGGCGAAGGCGGCCCCACTGGATCGGTACTGACGCTGAGGTGCGAAAGCGTGGGGAGCAA  
ACAGGATTAGAAACCCCTGTAGTCC

>Otu6988

CCAGCCTATGGGACGCTGCAGTGGGGAATCTTGCGCAATGGGCGAAAGCCTGACGCAGCA  
ACGCCGCGTGAATGATGAAGGCCTTCGGGTGTAAAGTTCTTTTGGCGGGGACGATGATG  
ACGGTACCCGCGAGAATAAGCTCCGGCTAACTTCGTGCCAGCAGCCGCGGTAATACGAAGG  
GAGCTAGCGTTGTTTCGGAATTACTGGGCGTAAAGGGCGCGTAGGCGGTTTGACAAGTTGG  
ATGTGAAAGCCCAGGGCTCAACCCTGGAATTGCATTCAAGACTGTCTTACTTGAATTCGG  
TAGAGGTTGGTGGAATTCCCACTGTAGAGGTGAAATTCGTAGAGATTGGGAAGAACACCC  
GTGGCGAAGGCGGCCAACTGGACCGACATTGACGCTGAGGCGCGAAAGCGTGGGTAGCAA  
ACAGGATTAGAGACCCCAGTAGTCC

>Otu6989

CCAGCCTATGGGATGCAGCAGTCGAGAATTTTTCTCAATGGGCGAAAGCCTGAAGGAGCG  
ACGCCGCGTGGGGGATGAAGGGCTTCGGCTCGTAAACCCCTGTCATTTGCGAACAAACCC  
CGCTTTTTTAATAGAGGGCGGGCTGATTGTAGCGAAAGAGGAAGGGACGGCTAACTCTGTG  
CCAGCAGCCGCGGTAATACAGAGGTCCCAAGCGTTGTTTCGATTCACTGGGCGTAAAGGG  
TGCGCAGGTGGCTGGGTAAGTTTGACGTGAAATCTCCGGGCTCAACCCGAAAATGCGTT  
GAATACTATCCGGCTGGAGGGTTGGAGGGGAGACTGGAATTCCTCGGTGTAGCAGTGAAGT  
GCGTAGATATCGAGAGGAACACCACTGGCGAAGGCGAGTCTCTGGACAACCTCTGACACT  
GAGGCACGAAGGCTAGGGGAGCAAACAGGATTAGATAACCCCAGTAGTCC

>Otu6990

CCAGCCTATGGGGTGCTGCAGTGGGGAATCTTGCGCAATGGACGAAAGTCTGACGCAGCC  
ACGCCGCGTGAAGTGAAGAAGGCCTTCGGGTGTAAAGCTCTGTCTGGGCGGGACGAAAACCT  
TTTAGGGTTAACAGCCCTAGAAATTGACGGTACCGCCAAAGGAAGCACCAGGCTAACTCTG  
TGCCAGCAGCCGCGGTAATACAGAGGGTGCAAGCGTTGCTCGGAATCATTTGGGCGTAAAG  
GGCAAGTAGGTGGTCTCGTTTGTCTGAGGTGAAATCCCTAGGCTTAACCTGGGAACTGCC  
TCAGAAACGGCGAGACTGGAGTACTGGAGAGGGTTCGCGGAATTCCCGGTGTAGCGGTGAA  
ATGCGTAGAGATCGGGAGGAATACCAGAGGCGAAAGCGGCGGCCTGGACAGTTACTGACA  
CTCAACTGCGAAAGCGTGGGGAGCAAACAGGATTAGAAACCCAGTAGTCC

>Otu6993

CCAGCCTACGGGTCGCTGCAGTAAGGAATATTGGTCAATGGGCGCAAGCCTGAACCAGCC  
ATGCCGCGTGAAGGATGACTGCCCTATGGGTGTAAACTCTTTTGTACGGGAAAAAACCC  
CCTGCTCGTGTAGCGGGCTGATGGTACCGTAAGAATAAGGATCGGCTAACTCCGTGCCA  
GCAGCCGCGGTAATACGGAGGTTCCAAGCGTTATCCGGATTTATTGGGTTTAAAGGGTGC  
GTAGGCGGATTATTAAGTCAGTGGTGAAGCCTACAGCTTAAGTGTAGAACTGCCATTGA  
TACTGATGATCTTGAGTATAGTTGAGGTGGGCGGAATGTGTCATGTAGCGGTGAAATGCT  
TAGATATGACACAGAACACCGATTGCGAAGGCAGCTCGCTAAGCTATAACTGACGCTGAG  
GCACGAAAGCGTGGGGATCAAACAGGATTAGAAACCCTGTAGTCC

>Otu6994

CCAGCCTACGGGTGGCACCAGTGGGGAATCTTGCGCAATGGGCGAAAGCCTGACGCAGCA  
ACGCCGCGTGAAGGACGAAGGTCTTCGGGTGTAAACCTCTTTCAGCAGGGACGATTGTG  
ACGGTACCTGCAGAAGAAGCCCCGGCCAACTACGTGCCAGCAGCCGCGGTAATACGTAGG  
GGGCGAGCGTTGTCCGATTCAATTGGGCGTAAAGAGCTCGTAGGCGGCTTGTTAGTTGG  
GTGTGAAACCTCCAGGCTTAACCTGGAGACGCCACTCAATACTGCCATGGCTAGAGTCCG  
GTAGGAGACCACGGAATCCCTGGTGTAGCGGTGAAATGCGCAGATATCAGGAGGAACACC  
GGTGGCGAAGGCGGTGGTCTGGGCCGGCACTGACGCTGAGGAGCGAAGGCCAGGGGAGCA  
AACGGGATTAGATAACCCCGTAGTCC

>Otu6998

CCAGCCTACGGGGTGCTGCAGTCGAGAATCTTCCGCAATGGGCGCAAGCCTGACGGAGCG  
ACACCGCGTGCAGGATGAAGGCCTTCGGGTGTAAACTGCTGTGTCAGGTCTAGGAACCGC  
TTGGTGTTAACAGCGCCAAGTCTGACCAAGACCAAAGGAAGCAACGGCTAACTCTGTGCC  
AGCAGCCGCGGTAAGACAGAGGTTGCAAACGTTGTTTCGGAATTACTGGGCATAAAGCGCA  
CGTAGGCGGTCCGCTAAGTCAGGTGTGAAATCCCCCGGCTCAACTGGGGAATTGCGCCTG  
ATACTGGCGGGCTTGAGATCGATAGGGGTGAGCGGAACTCCAGGTGGAGCGGTGAAATGC  
GTAGATATCTGGAGGAACACCGGTGGCGAAAGCGGCTCACTGGATCGACACTGACGCTGA  
GGTGCAGAAAGCTAGGGTAGCAAACGGGATTAGAAACCCGAGTAGTCC

>Otu7002

CCAGCCTACGGGGGGCACCAAGTAAGGAATATTGGTCAATGGACGCAAGTCTGAACCAGCC

ATGCCGCGTGAAGGATGAAGGCGCTATGCGTCGTAAACTTCTTTTATACGGGAGAAAACC  
CCCCGAGTTCTCGGGGGCTGATAGTACTGTAAGAATAAGGGTCGGCTAACTTCGTGCCAG  
CAGCCGCGGTAATACGAAGGACCCGAGCGTTATCCGGATTCACTGGGTTTAAAGGGTGCG  
TAGGCGGGTAAGTAAGTCCGTGGTGAAATCTCTGAGCTTAACTCAGAACTGCCGTGGAT  
ACTATTTGCCCTTGAATATTGTGGAGGTGAGCGGAATATGTCATGTAGCGGTGAAATGCTT  
AGATATGACATAGAACACCAATTGCGAAGGCAGCTCACTACACAATCATTGACGCTGAGG  
CACGAAAGCGTGGGGATCAAACAGGATTAGAAACCCGTGTAGTCC

>Otu7003

CCAGCCTATGGGTTGCTGTCAGTCGAGAATGTTCCACAATGGACGAAAGTCTGATGGAGTG  
ACGCCGCGTGATTGATGAAGTGGTTCGCCACGTAAAGATCTTTTATGAGGGAAGAAGTAT  
ATTGACGGTACCTCATGAATAAGGGGCTCCTAACTCTGTGCCAGCAGGAGCGGTAATACA  
GAGGCCCAAGCGTTATCCGGAATTATTGGGCGTAAAGGGTGTGTAGGTGGCGTTGTTAG  
TCGTTTGTAAAGCCCGAGGCTCAACCTCGGAAGTGCGAACGAAACGGCAATGCTTGAGT  
ATGTGAGAGGTAAAGCGGAACTCATGGTGTAGGGGTGAAATCCGTTGATATCATGGGGAAC  
ACCAAAGCGAAGGCAGCTTACTGGCACATTACTGACACTGAAACACGAAAGCGTGGGTG  
GCGAATGGGATTAGAAACCCCCGTAGTCC

>Otu7004

CCAGCCTATGGGGGGCTGTCAGTCAAGAATATTCTCAATGGCCGAAAGGCTGAAGGAGCG  
ACGCCGCGTGATAGGATGAAGGTCTTCGGATTGTAAACTACTTTTATCAGGGAAGAATTTG  
TGACGGTACCTGATGAATAAGAGGTTGCTAACTCTGTGCCAGCAGCAGCGGTAATACAGA  
GACCTCAAGCGTTATCCGGATTTATTGGGCGTAAAGCGTCCGCAGGTGGTTTAGCCAGTC  
AGGGGTCAAACTTTCCGCTTAACGGAAGGCTGCTTCTGATACTACTAACTCGAGTAT  
GGAAGAGGTTAGCGGAATTCTCGGTGTAGTCGTAATAAGCGTTGATATCGAGAAGAACAC  
CAAATGCGAAGGCAGCTAACTGGTACATTACTGACACTCATGGACGAAAGCGTGGGGAGC  
AAACAGGATTAGAAACCCGTGTAGTCC

>Otu7006

CCCAGCCTACGGGATGCTCCAGTGAGGAATATTGCTCAATGGGCGAAAGCCTGAAGCAGC  
AACGCCGCGTGTTGGGATGAAGGCCCTCTGGGTTGTAAACCACTGTAGAAAGGGACAAAGG  
TCGCGCTCTGCGGACTGGATGGTACCTTTAAAGTAAGCCTCGGCTAACTACGTGCCAGC  
AGCCGCGGTAATACGTAGGAGGCAAGCGTTGTCCGGAATCACTGGGTGTAAAGGGTGCGC  
TGCGGGGGAAGTAAGTCAATGGTGAAATCTCACGGCTTAACCGTGAAACTGCCACTGATA  
CTGCTTTTCTTGAGTGCGGGAGAGGGTGGTGGAATTCTTGGTGTAGTGGTGAAATGCGTA  
GATATCAAGAAGAACACCAGTGCGGAAGGCGGCCACCTGGCCCGTAACTGACGCTCATGC  
ACGAAAGCGTGGGGATCAAACAGGATTAGAACCCCGGTAGTCC

>Otu7007

CCAGCCTATGGGGGGCTGTCAGTGGGGAATCTTGACACAATGGGGGAAACCCTGATGCAGCG  
ACGCCGCGTGAGTGATGAAGCCCCTCGGGGTGTAAAGCTCTTTCGACGGGAGAGATAATG  
ACGGTACCCGAAGAAGAAGCTGCGGCTAACTACGTGCCAGCAGCCGCGGTAATACGTAGG  
CAGCAAGCGTTGTTTCGGAATTACTGGGCGTAAAGAGTGTGTAGGCGGTGCTCTAAGTCTG  
TCGTGAAATCTCCCGGCTTAACTGGGAGGGTGCGGCGGAAACTAGTGTGCTAGAGGGTGG  
GAGAGGTAAGCGGAACTCCTGGTGTAGCGGTGAAATGCGTAGATATCAGGAGGAACACCT  
GTGGTGTAGACAGCTTACTGGACCACTTCTGACGCTGAGACACGAAAGCGTGGGTAGCAA  
ACAGGATTAGAAACCCGAGTAGTCC

>Otu7009

CCAGCCTACGGGTGGCAGCAGTCGAGAATCATTCGCAATGGGCGCAAGCCTGACGATGCG  
ACGCCGTGTGTGCGATGAAGGCCTTCGGGTGTAAAGCACTTTCGCTTGGAACAAGAGA  
GGTTGGCTAATATCCAGCCGATTTGAGGGTACCAGGTAAAGAAGCACCGGCTAACTCCGC  
GCCAGCAGCTGCGGTAATACGGAGGGTGCAAGCATTAAATCGGATTTATTGGGCGTAAAGG  
GCGCGTAGGCGGGCCTGTAAAGTCAGATGTGAAATCCCGGAGCTCAACTCCGGAACAGCAT  
TTGAAACTGTGGGTCTAGAGGATAGGCGGGGAAATGGAATTCCACAAGTAGCGGTGAAA  
TACGTAGATATGTGGAAGAACACCGGTGGCGAAGGCGATTTTCTAGCTTATACCTGACGC  
TGAGGCGCGAAAGTAAGGGGATCAAACAGGATTAGATACCCCTGTAGTCC

>Otu7012

CCAGCCTATGGGTGGCACCAGTTTCGAATCATTCACAATGGGCGAAAGCCTGATGGTGCG  
ACGCCGCGTGGGGGATGAAGGTCTTCGGATCGTAAACTCCTGTCATGAGGGAACAAACCC  
GCGCGTTTTACCGATGCGCGGCTGATAGTACCTCAAGAGGAAGAGACGGCTAACTCTGTG  
CCAGCAGCCGCGGTAATACAGAGGTCTCAAGCGTTGTTTCGGATTCAATTGGGCGTAAAGG  
TGCGTAGGCGGCGAAGCAAGTCAGATGTGAAATCCCGGGGCTCAACCCCGGAACTGCATT

TGATACTGCTTTGCTCGAGGACTGGAGAGGAGATCGGAATTCACGGTGTAGCAGTGAAAT  
GCGTAGATATCGTGAGGAAGGCCAGTGGCGAAGGCGGATCTCTGGACAGTTCCTGACGCT  
GAGGCACGAAGGCCAGGGGAGCAAACGGGATTAGAGACCCTAGTAGTCC

>Otu7018

CCAGCCTATGGGGTGCAGCAGTGGGGAATTTTGTGCAATGGGCGAAAGCCTGACACAGCG  
ACACCGCGTGAGTGACGAAGCCCTTTGGGGTGTAAACTCTGTGCGCTGGAACGAAAAAA  
ATGACGGTACCAGCAAAGGAAGCATCGGCTGACTACGTGCCAGCAGCCGCGGTAAGACGT  
AGGATGCGAGCGTTGTCCGGATTTCATTGGGCGTAAAGGGTTCGTAGGCGGTTTGCCAAGT  
CTGATGTTAAAGATCGGGGCTCAACCCCGGGAATGCATTGGAACTGGCAGACTCGAGTA  
CGGTAGAGGTAAGTGAATTTCCAGTGTAGCGGTGAAATGCGTAGATATTGGAAAGAACA  
CCAGTGGCGTAAGCGACTTACTGGGCCGTAACTGACGCTGAGGAACGAAAGCCAGGGTAG  
CGAATGGGATTAGAAACCCTCGTAGTCC

>Otu7024

CCAGCCTACGGGAGGCCACCAGTGGGGAATCTTGCGCAATGGGCGAAAGCCTGACGCAGCA  
ACGCCGCGTGGGTGATGAAGGATTTTCGGTCTGTAAACCCTGTCGTCGGGGACGAAGGTG  
GGCGTGTTAATAACGCGTTTACTTGACGGTACCCGGAGAGGAAGCCCCGGCTAACTCTGT  
GCCAGCAGCCGCGGTAATACAGAGGGGGCAAGCGTTATTCGGAATTATTGGGCGTAAAGG  
GCGCGTAGGCGGCTTTTTTAAGTCGGATGTGTAATCCCCGAGCTTAACTTGGGAACTGCAT  
CCGAGACTGGGAGGCTAGAGTGCTGGAGAGGATGGTAGAATTCACGTGTAGCGGTGAAA  
TGCGTAGAGATGTGGAGGAATACCGGTGGCGAAGGCGGCCATCTGGACAGCAACTGACGC  
TGAGGCGCGAAAGTGTGGGTAGCAAACAGGATTAGAAACCCTGTAGTCC

>Otu7025

CCAGCCTATGGGATGCACCAGTGGGGAATCTTGCGCAATGGGCGAAAGCCTGACGCAGCA  
ACGCCGCGTGCGGGATGAAGGCCTTCGGGTGTAAACCGCTTTCAGCAGGGACGAAAAATG  
ACGGTACCTGCAGAAGAAGCCCCGGCCAACTACGTGCCAGCAGCCGCGGTAACACGTAGG  
GGGCAAGCGTTGTCCGGATTTATTGGGCGTAAAGAGCTCGTAGGCGGCTCGGTAAGTCGG  
GTGTGAAACCTCCAGGCTCAACCTGGAGACGCCACCCGATACTGCTGTGGCTAGAGTCCG  
GTAGGGGAGCGTGGAATTCCTGGTGTAGCGGTGAAATGCGCAGATATCAGGAGGAACACC  
AGCGGCGAAGGCGGCGCTCTGGGCCGGAACCTGACGCTGAGGAGCGAAAGCGTGGGGAGCA  
AACAGGATTAGAAACCCAGTAGTCC

>Otu7031

CCAGCCTACGGGGCGCAGCAGTCGAGAATCTTCCCCAATGGGCGAAAGCCTGAGGGAGCG  
ACGCCGCGTGCGGGATGAAGGCCTTCGGCTGTAAACCGCTTTTATTTCGGGAAGAAGCGC  
AAGCTGACGGTACCGAATGAATAAGAGGTTGCTAACTCTGTGCCAGCAGCAGCGGTAATA  
CAGAGACCTCAAGCGTTATCCGGATTTATTGGGCGTAAAGCGTCCGCAGGTGGTTTCGTTA  
AGTCATTGGTCAAATCCCGGGGCTCAACCCCGGAACTGCCAATGATACTGGCGAACTTGA  
GACCGGTAGAGGCAAGCGGAATTACAGGTGTAGCGGTAAAATGCGTTTATATCTGTAAAG  
ACACCAAAGGCGAAAGCAGCTTGTGGAACGGTTCTGACACTCATGGACGAAAGCGTGGG  
GAGCGAAAAGGATTAGAAACCCGCGTAGTCC

>Otu7035

CCAGCCTATGGGGCGCAGCAGTGGGGAATATTGGACAATGGGCGAAAGCCTGATCCAGCA  
ATGCCGCGTGTGTGAAGAAGGCCTTCGGGTGTAAAGCACTTTAGGCAGGGAAGAAAAAA  
TCGGCGTGAATATCGCCGGTCTTGACGGTACCTGAGGAATAAGCACCGGCTAACTCTGTG  
CCAGCAGCCGCGGTAATACAGAGGGTGAAGCGTTAATCGGATTTACTGGGCGTAAAGCG  
TGTGTAGGTGGTCAAGAAAGTCGGTTGTGAAATCCCTGGGCTCAACCCGGGAACTGCTTC  
CGATACTTCATGACTCGAATTCGGTAGAGGGAGGCGGAACTCCAGGTGTAGCGGTGAAAT  
GCGTAGATATCTGGAAGAACACCAATGGCGAAGGCAACCTCCTGGGCCTGAATTGACACT  
GAGACACGAAAGCGTGGGGATCAAACAGGATTAGAAACCCTCGTAGTCC

>Otu7036

CCAGCCTATGGGATGCTGCAGTGGGGAATATTGGACAATGAGCGAAAGCTTGATCCAAC  
ATATCACATGAAAGAAGAAGGATTTTCGGTCTGTAAATTTTCGATAGCTAAAGAACATAATG  
ATATTATTTAGCGAATTAGCCCTGGCTAACTTCGTGCCAGCAGCTGCGGTAATACGGAGG  
GGGCGAGTGTTACTCATAATGATTGGGCGTAAAGGGTATGTAGGCGGTTTATTAAGTTCT  
TGATTAAAACCTTGAGGAATAAAGGAAATGATAGAATACTGATAAGCTTGAGTTTAGTG  
GGGAGAGCAGTACTGTAAGTGTAGGGGTAAAATCCGGTAAAATATTTATAGGACTATCA  
ATGGCGAAAGCAGTAATCTGAATTAACTGACGCTGAGGTACGAAAGCATAGGGATCAAA  
AAGGATTAGAGACCCTCGTAGTCC

>Otu7040

CCAGCCTATGGGGCGCTGCAGTCGAGAATCTTCCACAATGGACGAAAGTCTGATGGAGCG  
ACGTTACGTGAAGGATGAAGCCCTTCGGGGTGTAACCTTCTTTTATTTGGGAGGAAGTTA  
TTGACAGTACCAAATGAATAAGGGGGTCCTAATTCTGTGCCAGCAGGAGCGGTAATACAG  
AACCCCCGAGCGTTACCCGGATTTATTGGGCGTAAAGGGTCAGTAGGTGGCAAAGTAAGT  
TTTGCGTTAAAGCTCATCGGCTCAACCTTTGAGATGCACAAAATACTGCTATGCTAGAGG  
GCGTTAGAGGTGAATGGAACCGACGGAGTAGGGGTGAAATCCGTTGATCTCGTCGGGAAC  
ACCAAAGCGAAGGCAATTCAGTGGGGCGACCCTGACACTGAATGACGAAAGCGTGGGGA  
GCAAAAAGGATTAGATACCCTAGTAGTCC

>Otu7041

CCAGCCTATGGGTCGCAGCAGTCGAGAATTTTTTACAATGGGGGAAACCCTGATGGAGCG  
ACGCCGCGTGGGGGATGAATGGCTTCGGCCCGTAAACCCCTGTCATTTGCGAACAAATTA  
ATCTACCCAACACGTGGATTATTGATAGTAACGGAAGAGGAAGGGACGGCTAACTCTGTG  
CCAGCAGCCGCGGTAATACAGAGGTCCCAAGCGTTGTTTCGGATTCACTGGGCGTAAAGGG  
TGCGTAGGCGGTCGGGTAAGTCTGACGTGAAATCTCCGGGCCTAACCCGAAACTGCGTC  
GGATACTATCCGGCTAGAGGATTGGAAGGGAGACTAGAATACTTGGTGTAGCAGTGAAAT  
GCGTAGATATCAAGTGGAACACCAGTGGCGAAGGCGAGTCTCTGGACAATTCCTGACGCT  
GAGGCACGAAAGCCAGGGGAGCAAACGGGATTAGAAACCCTAGTAGTCC

>Otu7052

CCAGCTATGGGTGGCTCCAGTGGGGAATCTTGCTCAATGGGCGAAAGCCTGAAGCAGCGA  
CGCCGCGTGCGGGATGAAGGCCCTCGGGTTGTAAACCGCTTTCAGCAGGGACGAAATTGA  
CGGTACCTGCAGAAGAAGGCCCGGCCAACTACGTGCCAGCAGCCGCGGTAATACGTAGGG  
GCCTAGCGTTGTCCGGATTTATTGGGCGTAAAGAGCTCGTAGGCGGTTTGGTGAGTCGGG  
TGTGAAATCTCCACGCTCAACGTGGAGGGGCCACCCGATACTGCCATGACTAGAGTCCGG  
TAGGGGAGTGTGGAATTCCTCGGTGTAGCGGTGAAATGCGCAGATATCGGGAGGAACACCA  
GTAGCGAAGGCGACACTCTGGGCCGGTACTGACGCTGAGGAGCGAAAGCGTGGGGAGCAA  
ACAGGATTAGATACCCTCGTAGTCCG

>Otu7056

CCAGCCTATGGGATGCAGCAGTGTGGAATATTGGGCAATGAACGCAAGTTCGATCCAGCA  
ATATCGCGTGAGTGAGGAAGGTCCTTTACCGTAAAGCTCTTTCGACAATGTGAGAAAAATG  
ACAAAATATTGTAAAAGAAACCCCGACTAACTTCGTGCCAGCAGTCGCGGTAATACGGGG  
GGGTTAGTGTTATTTCATCATTACTGGGTGTAAAGCGCGCGTAGACTGTTTAAAAAGTTTT  
AATTAACAATCTGAGCATAACTCAGAAATTAATTCTTATACTTTTAGACTTGAGGTTG  
GAGGAAGAAAGCTATACTTCTCAGAGAAAAGTGAATTTGTCCGAAGTGAAGGGGATAAC  
CAGCAGGCGAAAGCGGCTTTCTATGACAATGCTGACGTTTTGGCGCAAAAGCTTGGGGAT  
CAAACGGGATTAGAAACCCTAGTAGTCC

>Otu7065

CCAGCCTACGGGGGGCAGCAGTCGAGAATCTTCCCCAATGGGCGAAAGCCTGAGGGAGCG  
ACGCCGCGTGTGGGACGAAGTACTTCGGTATGTAAACCACTGTTAGGGTTATGAAAGCGA  
CAGGACCTAATACGTCTTGAAGTTGATCTGACCCAGAGAAAGGGACGGCTAACTCTGTGC  
CAGCAGCCGCGGTAATACAGAGGTCCCGAGCGTTACTGAGAATCACTGGGTTTAAAGGGT  
GCGTAGGTGGTCCGTTAAGTCAGTTGTGAAATCCCCGGGCTCAACCCGGGAACTGCTTCT  
GATACTGGCGGACTTGAGGCCAGTAGGGGTCACTAGAACTGACGGTGGAGCGGTGAAATG  
CGTAGATATCGTCAGGAATGCCGGTGGTGAAGACGGGTGACTGGGCTGGTTCTGACACTG  
AGGCACGAAAGCGTGGGGAGCGAACGGGATTAGATACCCTGGTAGTCC

>Otu7067

CCAGCCTACGGGTCGCACCAGTCGAGAATTTTTTCTCAATGGGCGAAAGCCTGAAGGAGCG  
ACGCCGCGTGGGGGATGAATGGCTTCGGCCCGTAAACCCCGTCATTTGCGAACAAATTG  
ACTCACCTAACACGTGTGTCAATTGATTGTAGCGAAAGAGGAAGGGACGGCTAACTCTGTG  
CCAGCAGCCGCGGTAATACAGAGGTCCCAAGCGTTGTTTCGGATTCACTGGGCGTAAAGGG  
TGCGTAGGTGGCAAGGTAAGTTTGATGTGAAATCTCCGGGCTTAACCCGGAACTGCATT  
GAATACTATCTCGCTCGAGGATTGGAGGGGAGACTGGAATACTTGGTGTAGCAGTGAAAT  
GCGTAGATATCAAGTGGAACACCAGTGGCGAAGGCGAGTCTCTGGACAAATCCTGACACT  
GAGGCACGAAAGCTAGGGGAGCAAACAGGATTAGATACCCCGTAGTCC

>Otu7071

CCAGCCTATGGGTCGCAGCAGTGGGGAATCTTGCGCAATGGGCGAAAGCCTGACGCAGCG  
ACGCCGCGTGGGTGATGAAGGCCCTTCGGGTGTAAAGCTCTGTGGGGAGGGACGAATAAG  
TGTTGGCTAATATCCAGCATGATGACGGTACCTCTTTAGCAAGCACCGGCTAACTCTGTG  
CCAGCAGCCGCGGTAAGACAGAGGGTGCAAACGTTGTTTCGGAATTACTGGGCGTAAAGCG



TGTGTAGGCTGCCTCGTAAGTCGGATGTGAAAGCCCCGGGCTCAACCCGGGAAGTGCAC  
CGATACTGCGGAGCTTGAGTGTGCGAGAGGTTGGTAGAATTCTCGGTGTAGAGGTGAAAT  
TCGTAGATATCGAGGGGAATACCGGTGGCGAAGGCGGCCAACTGGACGAACACTGACGCT  
GAGACACGAAAGCGTGGGTAGCAAACAGGATTAGATACCCGAGTAGTCC

>Otu7072

CCAGCCTACGGGGGGCAGCAGTGGGGAATATTGGGCAATGGGCGAAAGCCTGACCCAGCC  
ACGCCGCGTGAGTGATGAAGGCCTTCGGGTCTGTAAGCTCTGTGGGGAGGGACGAACAAG  
CACGGTGCTAACATCACCGGGCCCTGACGGTACCTCCTTAGCAAGCACCGGCTAACCCCTG  
TGCCAGCAGCCGCGGTAAATACAGGGGGTGTAAACGTTGCTCGGAATCATTTGGGCGTAAAG  
CGCACGTAGGCGGTCTGTTATGTTCGGATGTGAAAGCCCTTGGCTTAACCGAGGAAGTGCA  
TCCGAAACTGGCAGGCTAGAGTACTAAAGAGGGTTCGCGGAATTCCCGGTGTAGAGGTGAA  
ATTCGTAGATATCGGGAGGAACACCGGTGGCGAAGGCGGCGACCTGGGTAGATACTGACG  
CTGAGGTGCGAAAGCGTGGGGAGCAAACAGGATTAGATACCCAGTAGTCC

>Otu7074

CCAGCCTACGGGTTCGAGCAGTTAGGAAATTTTGCCAATGGGGGAAACCCTGAGCGAGTA  
ACGCCGCGTGAGGAGACGAAGGCCTTCGGGTGTAAACTCCTTTTCTGTGGGAAGATGATG  
ACGGTACCACAGGAAGAAGCCCCGGCTAACTACGTGCCAGCAGCCGCGGTAAATACGTAGG  
GGCGAGCGTTGTCCGAATTACTGGGCGTAAAGAGCGCGTAGGCGGCACGATAAGTTCT  
GTGTGAAAGCCCCGGCTCAACTGGGGAGGGACGCGGAAAACGTGCGAGCTGGAGTGTCTG  
GAGAGGGAAGTGGAAGTCCCGGAGTAGGGGTGAAATCCGTAGAGACCGGGCCGAACACCA  
GTGGCGAAGGCGACTTCCTGGCCGACGACTGACGCTGAGGCGCGAAAGCGTGGGGAGCGA  
ACGGGATTAGATACCCGAGTAGTCC

>Otu7078

CCAGCCTACGGGTTCGAGCAGTAAGGAATATTGGACAATGGGCGCAAGCCTGATCCAGCC  
ATGCCGCGTGAGGATGAAAGTGCTCAGCACTGTAAACTGCTTTTGTTCGGGAAAAATTC  
CCTGGTTTCTACCGGGGTGTGATTGTACTGAAAGAATAAGGGACGGCTAACTTCGTGCCAG  
CAGCCGCGGTAAATACGAAGGTCCCAAGCGTTATCCGGATTTATTGGGTTTAAAGGGTGCG  
TAGGCGGACTATTAAGTCAGTGGTGAAATCCTGCAGCCTAACTGTAGAATTGCCATTGAT  
ACTGATGGTCTTAAGTACATTTGAAGTGGGCGGAATGTGTTCATGTAGCGGTGAAATGCTT  
AGATATGACACAGAACACCGATTGCGTAGGCAGCTCGCTAAACTGTAGCTGACGCTGAGG  
CACGAAAGCGTGGGGAGCAAACAGGATTAGAAACCCTCGTAGTCC

>Otu7083

CCAGCCTACGGGATGCTCCAGTGGGGAATCTTGACACAATGGGGGCAACCCTGATGCAGCG  
ACGCCGCGTGAGCGATGAAGCCCTTCGGGGTGTAAAGCTCTTTCGGCAGGGACGATAATG  
ACGGTACCTGAAGAATAAGCACCGGCTAACTACGTGCCAGCAGCCGCGGTAAATACGTAGG  
GTGCAAGCGTTAATCGGAATTACTGGGCGTAAAGCGTGCGCAGGCGGTCTATAAGACAG  
ATGTGAAATCCCCGGGCTCAACCTGGGAACTGCATTTGTGACTGTAGAGCTGGAGTGCAG  
CAGAGGGGGATGGAATTCCGCGTGTAGCAGTGAAATGCGTAGATATGCGGAGGAACACCG  
ATGGCGAAGGCAATCCCCTGGGCCTGCACTGACGCTCATGCACGAAAGCGTGGGGAGCAA  
ACAGGATTAGAGACCCTTGTAAGTCC

>Otu7086

CCAGCCTATGGGGTGCAGCAGTCGAGAATCATTCGCAATGGGCGAAAGCCTGACGATGCG  
ACGCCGTGTGAGCGAAGAAGGCCTTAGGGTCTGTAAGCTCTTTCGCTTGGGAACAAGAGG  
AGTTGGTTAATACCCGATGACTTTGAGCGTACCAGGTAAAGAAGCACCGGCTAACTCCGT  
GCCAGCAGCTGCGGTAATACGGAGGGTGCAAGCATTAAATCGGATTTATTGGGCGTAAAGG  
GCGCGTAGGCGGGGATAATAGTCAGATGTGAAATCCCGGGGCTCAACCTCGGAACTGCAT  
TTGAAACTGTATCTCTAGAGGGTAGGCGGAGAAAACGGAATTCACAAAGTAGCGGTGAAA  
TGCGTAGATATGTGGAAGAACACCGGTGGCGAAGGCGGTTTTCTAGCTTACTCCTGACGC  
TGAGGCGCGAAAGCAAGGGGATCAAACAGGATTAGAGACCCGCGTAGTCC

>Otu7092

CCAGCCTATGGGTGGCAGCAGTGGGGAATATTGGACAATGAACAAACGTTTCGATCCAGCA  
ACATCGCGTGAGTGAAGTTTTTGTATCTATTATTTATAAAATAAAAACATATAAAATGA  
AACAGAATAGAAGGTCTAGAATTGTAAAGCTCTTTTATTAAGGAAGATAATGACGTTACT  
TAATGAATAAGCCCCGGCTAACTTCGTGCCAGCAGCCGCGGTAAAACGGAGGGGGCTAGT  
GTTATTCGTGTTGACTGGGCGTAAAGGGTATGTAGGCGGTTTGGCTAGTGCTTAGTAAAA  
GACTGGAGCTTAACCTTCTTGAATGCTTTGCAGACAGCTGAACTAGAGTACAGGAGAGGAT  
AGTGGAACCTATTAATGTAGAGGTAAAATTTGAAAATATTAATAGGAACATCAATAGGCGA  
AGGCGACTATCTGGTCCGTAACCTGACGCTGAGATACTAAAGCATGGGGAGCGAACAGGAT

TAGATACCCCGGTAGTCC

>Otu7099

CCAGCCTATGGGTCGCAGCAGTGGGGAATTTTGGACAATGGGGGAAACCCTGATCCAGCA  
ACTCTGCGTGAGGGACGAAGCCTTTTCGGGGCGTAAACCTCTTTTATCTGGGAAGAACACC  
CGCAAGGGTCTGACGGTACCAGGTGAATAAGCCACGGCTAACTATGTGCCAGCAGCCGCG  
GTAAGACATAGGTGGCGAGCGTTATTTCGGAATTACTAGGCGTAAAGCGAGTGTAGGCGGG  
CGCTTAAGTCTGTTGTGAAATCTCCCGGCTTAACTGGGAGGGGTCAATGGATACTGGGCG  
TCTTGAGTGAGGTAGGGGGTACTGGAATTCCCGGTGTAGCGGTGAAATGCGTAGATATCG  
GGAGGAACACCTATGGCGAAAGCGGCGCACTGGACCACATCTGACGCTGAGGCGCGAAAG  
CTAGGGGAGCAAACAGGATTAGAGACCCCGGTAGTCC

>Otu7101

CCAGCCTATGGGGGGCAGCAGACGAGAATATTCCGCAATGGACGAAAGTCTGACGGAGCG  
ACACTGCGTGATGGATGAAGTGCTTCGGTACGTAAACATCTTTTATCGGGGAAGAAGTCT  
ATTGACGGTACCCGGTGAATAAGGGGCTCCTAACTCTGTGCCAGCAGGAGCGGTAATACA  
GAGGCCCCGAGCGTTACCCGGAATCACTGGGCGTAAAGGGTGTCCAGGTGGCCATATTAG  
TCTTTCGTAGAATCCGTGGGCTTAACCTACGGCGCGCGAGGGAAACGGTATGGCTCGAGG  
GCGCGAGAGGTGCATGGAACCTCATGGTGGAGGGGTGAAATCCGTTGATATCATGGGGAAC  
ACCAAAGGCGAAGGCAGTGCACCTGGCGCGTTCCCTGACACTCACACACGAAAGCCAGGGGA  
GCGAACGGGATTAGAGACCCTAGTAGTCC

>Otu7107

CCAGCCTATGGGTCGCAGCAGTGGGGAATTTTGGACAATGGGCGAAAGCCTGATCCAGCA  
ATGCCGCGTGTGTGAAGAAGGCCCTTCGGGTGTAAAGCACTTTTGGCGGGAACGAAACGG  
TTCTTTCTAATACAGAGGACTAATGACGGTACCCGCGAGAATAAGCACCCGGCTAACTACGT  
GCCAGCAGCCGCGGTAATACGTAGGGTGCAAGCGTTAATCGGAATTACTGGGCGTAAAGC  
GTGCGCAGGCGGTTATGTAAGACAGATGTGAAATGCCCGGGCTTAACCTGGGAACTGCAT  
TTGTGACTGCATGGCTAGAATCTGGCAGAGGGGGGTAGAATTCACGTGTAGCAGTGAAA  
TGCGTAGATATGTGGAGGAACACCGATGGCGAAGGCAGCCCCCTGGGCTAAGATTGACGC  
TCATGCACGAAAACGTGGGGAGCAAACAGGATTAGAAAACCCCGTAGTCC

>Otu7108

CCAGCCTATGGGAGGCAGCAGTGGGGAATATTGGACAATACGCAAAAGCGTGATCCATCG  
ATATCGAGTGTGCGATGACGGCGGATTGTTGTAAAGTGCTTTTGCTAGTGAGGATTATGA  
CGGTAAGTACGAGAAATAAGCCCTGGCTAAATGACGTGCCAGCAGCCGCGGGAATACGTTA  
GGGGCGAGCGTTATCCATATTTACTAGGCGTAAAGGGTGCCTAGATGGTTTGGGAACAAT  
TTGGTAGAAAGAACAAGGTAACCCTTGTGTAGTGCGAAATTAATTCTTTTAACTTGAGTG  
TCTAACAGGAATTTAGTATTTCTAAAGGGAGACGTTACAGTCTGAGAATTTAGGAGGATT  
TCCATGTGCGAAGGCAAAATTTCTGGTTGGATTCTGACGTTGAGGCACGAAGGCATGGGGA  
GCAAAGCGGATTAGAAACCCCTGTAGTCC

>Otu7110

CCAGCCTACGGGGGGCACCAGCATGGAAGTCGTACAAACCAATATTCTGATGAAGCTTA  
CCGCAATATTTCTGAAGGCTGGGAAGAAGACTATTTCAATGGATTGAATGAGTTGTTCTGA  
GCCTTAGTATCCGCTAAAATTGTACGATAAGAATCGTCATTGCGAACAGAGTGAAGCAAT  
CTGCTGATTAAAGATTGCTTCACCTCGTTTCGCAATGACGTGACAACTAACAATCCTACT  
TGCCAAGCCCCCTCGTTTTCCGGTATCTGCAATAAATTTCCATTGCCCCCTTTTCGTTTAATT  
TCCAACCGTCATATACGTTCCCTTGGTAGTATCCTGCTTAGCAATAAGCTTCAGAAAC  
CATAGGTGTAACCCAATTCACCACTTTCAGCAATAATTGCTTTGGCTGGATTCCAGATTA  
GAAACCCAGTAGTCC

>Otu7112

CCAGCCTACGGGGTGCTCCAGTCGAGGATCTTCGGCAATGGACGCAAGTCTGACCGAGCG  
ACGCCGCGTGTGGGATGAAGGCCCTTCGGGTGTAAACCACTGTCAGTGGGGAGAAAATCG  
GTGAGAGTCATCTCTCATCGTTGATCTATCCGCAGAGGAAGCAAGGGCTAAGTTTCGTGCC  
AGCAGCCGCGGTAAGACGAACCTTGCAAACGTTATTTCGGAATCACTGGGCTTAAAGGGTG  
CGTAGGCGGCGCGGTAAGTTGGGTGTGAAATACCTCGGCTCAACCGAGGAACTGCGCCCCA  
AAACTACCGTGCTTGAGGGAGATAGAGGTGAGCGGAACTTAGGGTGGAGCGGTGAAATGC  
GTTGATATCCTAAGGAACACCCGTGGCGAAAGCGGCTCACTGGATCTCTTCTGACGCTGA  
GGCACGAAAGCTAGGGGAGCGAACGGGATTAGAAACCCCTAGTAGTCC

>Otu7115

CCAGCCTACGGGAGGCAGCAGTGGGGAATCTTGCAACAATGGGCGCAAGCCTGATGCAGCA  
ATGCCGCGTGAGTGATGAAGGCCCTTCGGGTGTAAATCTCTGTGCGCTGGGAAAAACGTC

TTTTCATCTAATAGGTGAAGAGAGTGATGGTACCAGCAAAGGAAGAGGCGGCTAACTCTG  
TGCCAGCAGCCGCGGTAATACAGAGGCCTCGAGCGTTGTTTCGGAATTACTGGGCGTAAAG  
GGAATGTAGGTGGTGACGTAAGTCGGATGTGAAAGCCCTGGGCTTAACCTGGGAAGTGCA  
TTTGATACTGCGTTGCTGGAGTGCGAGAGAGGAAAGCGGAATTCACAGTGTGGGAGTGAA  
ATCCGTAGATATTGGGAGGAATACCGATGGCGAAGGCAGCTTTCTGGCTCGTAACTGACA  
CTGAGATTGCAAAGCGTGGGTAGCAAACAGGATTAGATACCCCCGTAGTCC

>Otu7118

CCAGCCTATGGGGCGCACCAGCGAGGAATATTGCACAATGGGCGCAAGCCTGATGCAGTA  
ACGCCGCGTGAGGGATGAAGACCTTCGGGTGTAAACCTCTTTTCAGCTTGACGAGTGAG  
GACGGTAAAGTTGGAATAAGTCTCGGCTAACTACGTGCCAGCAGCCGCGGTAAGACGTAG  
GAGGCGAGCGTTATCCGGATTCACTGGGCGTAAAGGGCATGTAGGCGGCTGGGCAAGTCC  
TTCGTGAAAGCCCCTGGCTCAACTGGGGGAGGACGAGGAGACTGTTTCGGCTTGAGGGTA  
GCAGAGGTGCGGTGGAACCTCCCGGTGTAGCGGTGGAATGCGTAGAGATCGGGAAGAACATC  
AGTGGCGAAGGCGACCGACTGGGCTGCAACTGACGCTGAAATGCGAAAGTGTGGGGAGCA  
AACGGGATTAGAAACCCTCGTAGTCC

>Otu7123

CCAGCCTATGGGGGGCAGCAGGCGCGCAAACCTTCACAATGCACCTTACGTGTGATGAGGGA  
AGTCTGAGTGATTTCCCTTCGGGAAATCTTTTGCCAACCTTAGTCAGGTTGGAGAATAGGT  
GCTGGGTAAAGACCGGTGGCAGCCGCCACGGTAATACCGGCGGCACAAGTGGTGTTCATA  
TTATTGGGCTTAAAGAGTCAGTAGCCGGCTGAGACAGTCTTGTGTGAAATATTGGTGCAT  
AACATCAATACGTGCATAAGATACTCTCAGCTAGGGAGCGGGGAGGTTAGGAGTATTC  
ATGGGGTAAGGGTAAATCTTGTAACTCTATGAAGACTACCGGTGGCGAAGGCGCCTAAC  
CAAAACGCATCCGACGGTGAGTGACGAAGGCCAGGAGAACGAATCGGATTAGAAACCCCC  
GTAGTCC

>Otu7124

CCAGCCTACGGGTGGCTGCAGTGAGGAATATTGCTCAATGGACGAAAGTCTGAAGCAGCA  
ACGCCGCGTGAGGGATGAAGGTGCTTTGCATTGTAAACCTCTGTAGTCGGAGACAAACGA  
CGGGTTACTACCCGTTTTGATGGTATCCGAAAAGTAAGGATCGGCTAACTACGTGCCAGCA  
GCCGCGGTAATACGTAGGATCCAAGCGTTGTCCGGATTTACTGGGTGTAAAGGGTGCGCA  
GGCGGGCTCATAAGTCAGGAGTGAAATCTCGGCGCTCAACGCCGAAACGTCTTTTGATAC  
TATGAGCCTTGAATCAGCGAGAGATGTGCGGAATTCAGAGTGTAGCAGTGAAATGTGTAG  
ATATTTCGAAGAACACCAGTGGCGAAGGCAGCACGTTGGCGCTCGATTGACGCTCAGGCA  
CGAAAGCATGGGGATCAAACAGGATTAGATACCCTCGTAGTCC

>Otu7126

CCAGCCTATGGGTGGCAGCAGTAGGGAATCTTGCGCAATGGACGAAAGTCTGACGCAGCA  
ACGCCATGTGTGGGATGACGCATTTTCGGTGTGTAAACCACTGTCGGCAGGGAATAAAGTC  
CGCTTTTTTAGCGGAGGTGAATGTACCTGCAGAGGAAGCCCCGGCTAACTTCGTGCCAGCA  
GCCGCGGTAATACGAGGGGGGCTAGTGTTGTTTCGGAATTACTGGGCGTAAAGGGAGCGTA  
GGCGGGTGCTTAAGTTGGATGTTTAAACCGGGGCCAACCCCGGCGTGGCATTCAAAAC  
TGGGCATCTTGAATGGGACAGAGGCCAGTGGAATTGGAGGTGTAGCGGTGGAATGCGTAG  
AGATCTCCAAGAACACCAGTTGCGAAGGCGGCTGGCTGGGTCCACATTGACGCTGAGGCT  
CGAAAGCGTGGGGAGCAAACAGGATTAGATACCCAAGTAGTCC

>Otu7128

CCAGCCTATGGGAGGCTGCAGTAAGGAATATTGGACAATGGGGGCAACCCTGATCCAGCC  
ATGCCGCGTGAGTGACGAAGGCCTTCGGGTGTAAAGCTCTTTTGCCGGGGACGATAATG  
ACGGTACCCGGAGAATAAGTCCCGGCTAACTTCGTGCCAGCAGCCGCGGTAATACGAAGG  
GGGCTAGCGTTGTTTCGGAATTACTGGGCGTAAAGCGCACGTAGGCCGAATGGTCAGTCAG  
AGGTGAAATCCCGGAGCTCAACTTCGGAACCTGCTTTGATACAACCATTTAGAGTCCGG  
AAGAGGTGAGTGGAATTCCTAGTGTAGAGGTGAAATTCGTAGATATTAGGAAGAACACCA  
GTGGCGAAGGCGGCTCACTGGTCCGGTACTGACGCTGAGGTGCGAAAGCGTGGGGAGCAA  
ACAGGATTAGAAACCCGGGTAGTCC

>Otu7129

CCAGCCTATGGGAGGCAGCAGTAAGGAATATTGGACAATGGTCGCAAGACTGATCCAGCC  
ATGCCGCGTGACAGGATGACGGCCCTATGGGTGTAAACTGCTTTTATACGGGAAAAAAC  
CCTCTACGTGTAGAGGGCTGATTGTACTGTAAGAATAAGGATCGGCTAGCTCCGTGCCAG  
CAGCCGCGGTAATACGGAGGATCCAAGCGTTATCCGGATTCATTGGGTTTAAAGGGTGCG  
TAGGCGGAATGATAAGTCAGTGGTGAAAGCCTGCAGCTTAACTGCAGAACTGCCATTGAT  
ACTGTCAATCTTGAGTATATTTGATGTGGGCGGAATGTGTTCATGTAGCGGTGAAATGCTT

AGATATGACACAGAACACCGATTGCGAAGGCAGCTCACAAAACCTATAACTGACGCTGGGG  
CACGAAAGCGTGGGTATCAAACAGGATTAGAAACCCGCGTAGTCC  
>Otu7139  
CCAGCCTACGGGAGGCACCAGTGGGGAATATTGGACAATGGGGGAAACCCTGATCCAGCG  
ATGCCGCGTGAATGAAGAAGGCCTTAGGGTTGTAAAGTTCTTTCACCTGTGACGATAATG  
ACGGTAACAGGAGAAGAAGCCCCGGCTAACTCCGTGCCAGCAGCCGCGGTAAGACGGAGG  
GGGCTAGCGTTGTTTCGGAATGACTGGGCGTAAAGGGCGCGTAGGCGGCCGATCAAGTCAG  
GTGTGAAAGCCTCGGGCTTAACCCGAGAATTGCGCTTGATACTGGTTGGCTAGAAGATGG  
AAGAGAAAAGCGGAATTCCTAGTGTAGAGGTGAAATTCGTAGATATTAGGAAGAACACCA  
GAGGCGAAGGCGGCTTTTTTGGTCCATTCTTGACGCTGAGGCGCGAAAGCGTGGGGAGCAA  
ACAGGATTAGATACCCTCGTAGTCC  
>Otu7140  
CCAGCCTATGGGGGGCACCAGCACAGGTCTCGAAACTTCAAATCCGATGAAGTCATGATA  
GCGATCGGAGGTGTAGCGATTCCCTCGCGACCTGGGTACGTCGAAACCAAATTCGGTGCG  
AATGTGGGCTTTGGGATTATCCGCGTAGGTGACTTCGTCACCGAATTTCTTCCGCAGTTT  
AGGAAACTCGACCGCTACTGCCCCGATTACGCGTGGGATGGCCAACGTTGTCTGCCGAGTA  
GTGCGCCAGGGCTCCGAGAGCGAAAGCGTATTTCGTTGAGGTCCGTCGCCTCGTGGATGAG  
ATTGACGACGAAATCTCCGCTGCGCACGTAATGAGTAAGGTCGCTAAAGTACTTGTGGC  
GAACGGGTAGTAGCCCATGTCTTGAATTAGAAACCCTAGTAGTCC  
>Otu7142  
CCAGCCTATGGGTGCGCTCCAGTAGGGAATCTTCCGCAATGGGCGAAAGCCTGACGGAGCA  
ACGCCGCGTGAGTGATGAAGGTTTTTCGGATCGTAAAGCTCTGTTGCCAGGGAAGAATGCC  
AGGGAGAGTAACTGCTCCCTGGGTGACGGTACCTGAGAAGAAAGCCCCGGCTAACTACGT  
GCCAGCAGCCGCGGTAATACGTAGGGGGCAAGCGTTGTCCGGAATTATTGGGCGTAAAGC  
GCGCGCAGGCGGCTAATTAAGTCTGGTGTCTAATCCCGGAGCTCAACTCCGGGTGCGACG  
GGAACTGGTTGGCTTGAGTACAGAAGAGGAAAGTGGAATTCACGTGTAGCGGTGAAAT  
GCGTAGAGATGTGGAGGAACACCAGTGGCGAAGGCGACTTTCTGGGCTGTAAGTACGCT  
GAGGCGCGAAAGCGTGGGGAGCAAACAGGATTAGAAACCCTAGTAGTCC  
>Otu7144  
CCAGCCTACGGGTGCGCTCCAGTGGGGAATTTTCCGCAATGGGCGCAAGCCTGACGGAGCA  
ACGCCGCGTGAGTGACGAAGTCTTTTCGGGATGTAAACCCCTTTTCAGCTGGGAAGAACACA  
ATGACGGTACCAGCAGAAGAAGCATCGGCTAACTACGTGCCAGCAGCCGCGGTAAGACGT  
AGGATGCGAGCGTTGTCCGGAATTATTGGGCGTAAAGCGTACGTAGGCGGTTTCATAAGT  
TAGAGGTTAAAGGCTGCGGCTCAACCCGAGAAATGCCTTTGATACTGTGAGACTGGAGGT  
TGTCAGAGGAAGGCGGAATTCCCAGTGTAGCGGTGAAATGCGTAGAGATTGGGAGGAACA  
CCAGAGGCGAAAGCGGCCTTCTGGGGCACACCTGACGCTGAGGTACGAAAGCCAGGGTAG  
CAAACGGGATTAGAAACCCTAGTAGTCC  
>Otu7150  
CCAGCCTATGGGGCGCTGCAGTCGAGAATATTTGGCAATGGGCGAAAGTCTGACCATGCG  
ACGCCGCGTGCTGGACGAAGTCCCTTCGGGACGTAAACAGCTTTTTCGCGTGAGGAAGTAA  
TTGACGTTAGCGCGCAATAAGGGGCTCCTAACTCTGTGCCAGCAGGAGCGGTAATACAG  
AGGCCCCGAGCATTATCCGGAATCACTGGGCGTAAAGGGTGTGTAGGCGGCTTTGTAGT  
CTTCCGTTAAAGTCTTTGGGCTCAACCCAGAGAATGCGGGAGAAACGGCAAGGCTTTGAG  
GACGCGAGAGGTAAGGGGAACCTCATGGTGTAGGGGTGAAATCCGTTGATATCATGGGGAA  
CACCAAATGCGAAGGCACCTTACTGGCGCGCTCCTGACGCTGAAACACGAAAGCGTGGGT  
AGCGAACGGGATTAGAAACCCTTGTAGTCC  
>Otu7153  
CCAGCCTACGGGTGGCAGCAGTCGAGAATCTTCCACAATGGACGAAAGTCTGATGGAGCG  
ACGCCGCGTGATTGATGAAGTCCCTCTGGGACGTAAAGATCTTTTATGAGGGAAGAAGTT  
TATTGACGGTACCTCATGAATAAGGGGCTCCTAACTCTGTGCCAGCAGGAGCGGTAATAC  
AGAGGCCCCAAAGCGTTATCCGGAATCACTGGGCGTAAAGGGTGTGTAGGCGGTCGTGTTA  
GTCTTTTCGTGAAAGATCTTGGGCCCAACCCAGGAGACGCGGGAGAAACGGCAGGACTCGA  
GAGTGTGAGAGGTACAGGGAACCTCATAGTGTAGGGGTGAAATCCGTTGATATTATGGGGG  
ACACCAAATGCGAAGGCACTGTACTGGCACATTTCTGACGCTGAAACACGAAAGCGTGGG  
CATCGAACGGGATTAGAAACCCCGTAGTCC  
>Otu7154  
CCAGCCTACGGGGTGCTGCAGTCGAGAATCTTTCGCAATGGGCGAAAGCCTGACGAAGCG  
ACGCCGTGTGAGCGAAGAAGGCCTTCGGGTGTAAAGCTCTTTCGCTAGGGAACAAGAAA

GAATGGTTAATAACCATTTCGATTTGATGGTACTTGGTAAAGAAGCACCGGCTAACTCCGT  
GCCAGCAGCTGCGGTAATACGGAGGGTGCAAGCATTGATCGGAATTACTGGGCGTAAAGG  
GCGCGTAGGCGGTCTGAAAAGTCGGATGTGAAATTCCGGGGCTCAACCCCGGAGCTGCAT  
TTGAAACTTTTCAGACTTGAGGTTGGCAAGGGAACCGGAATTCACGTGTAGCGGTGAAA  
TGCGTAGATATGTGGAAGAACACCGGTGGTGAAGACGGTTTTCTGTGCTAAACCTGACGC  
TGAGGCGCGAAAGCTAGGGGAGCAAACAGGATTAGATAACCCCGGTAGTCC

>Otu7156

CCAGCCTATGGGGTGCAGCAGTAGGGAATTTTCCACAATGGGCGAAAGCCTGATGGAGCA  
ACGCCGCGTGCAGGAGGAAGGCCCTCGGGTCGTAAACTGCTTTTATCTGTGATGATTTTG  
ACAGTAACAGATGAATAAGGATCGGCTAACTCCGTGCCAGCAGCCGCGGTCATACGGAGG  
ATCCAAGCGTTATCCGGAATTACTGGGCGTAAAGAGTTGCGTAGGTGGCATGGTAAGCAA  
ATAGTGAAAGACTACGGCTCAACCGTAGATACATTGTTTGAAGTCCAAGCTAGAGCATA  
GGAGAGGTAGCTGGAATTGCTAGTGTAGGAGTGAAATCCGTAGATATTAGCAGGAACACC  
GATGGCGTAAGCAGGCTACTGGCCTATTGCTGACACTAAGGCACGAAAGCGTGGGGAGCG  
AACGGGATTAGATAACCTTGTAGTCC

>Otu7161

CCAGCCTACGGGGCGCACCCAGTCGAGAATCTTCCGCAATGGGCGAAAGCCTGACGGAGCG  
ACGCCGCGTGGTTGATGAAGCACTTCGGTGCGTAAAAACCTTTTATGAGCGAGAAAGTCT  
ATTGATCAGCTCATGAATAAGAGGTTGCTAAACTCGTGCCAGCAGCAGCGGTAATACGAG  
TGCTCAAGCGTTATCCGGAATCATTGGGCGTAAAGGGTGTGTAGGCGGTCCCGTTAGTC  
TCCTGTTAAATCTTCGGCTCAACCGGGGGTCTGCAGGGGAAACGGCGGGACTTGAGGAT  
GCGAGGGGTCTCTGGAACCTCATGGTGTAGCGGTGAAATGCGTTGATATCATGGGGAACAC  
CGAAAGCGAAGGCAGGAGACTGGAGCATTCTTGACGCTGAAACACGAGAGCGTGGGTTCG  
GAATGGGATTAGATAACCCAGTAGTCC

>Otu7162

CCAGCCTATGGGGGGCACCCAGTCGAGAATCTTCCGCAATGGACGCAAGTCTGACGGAGCG  
ACGCCGCGTGGTAGATGAAGTCCTTCGGGACGTAAATACCTTTTATGGGGGATGACATTT  
CGACAGTACCTCATGAATAAGGGGCTCCTAACTCTGTGCCAGCAGGAGCGGTAATACAGA  
GGCCCCAAGCATTATCCGGAATCACTGGGCGTAAAGGGTGCGTAGGTGGCGTGATTAGTC  
CTCTTTCAAATCTTCCGGGCTCAACCCGGAAGCTCGAGGGGAAACGGTCATGCTCGAGGA  
TGTACGAGGTATGTGGAACCTTAGGTGTAGGGGTGAAATCCGTTGATATCTAGGGGAACA  
CCAAATGCGAAGGCAGCATACTGGGACATTCTTGACACTGAGGCACGAAAGCGTGGGTAG  
CGAAAAGGATTAGATAACCCGTGTAGTCC

>Otu7164

CCAGCCTATGGGGGGCACCCAGTGAGGAATATTGCGCAATGGGCGAAAGCCTGACGCAGCG  
ACGCCGCGTGGAGGATGAAGGCCTTCGGGTGTAAACCCCTGTCAGTGGGGAAGAGAATG  
GACGGTACCCACTGAGGAAGCTTCGGCTAACTACGTGCCAGCAGCCGCGGTAAGACGTAG  
GGAGCAAGCGTTGTCCGGAATTACTGGGCGTAAAGAGCTCGTAGGCGGGATCGTAAGTCC  
GAGAGGAAATCTCAAGGCTCAACTTTGGGGCTTTCTTGATACTGCGATTCTTGAGTATA  
TGAGAGGTAAGTAGAATTCCCGGTGTAGCGGTGAAATGCGTAGATATCGGGAGGAATACC  
AGTGGCGAAGGCGACTTACTGGCATATTACTGACGCTGAGGAGCGAAAGCGTGGGGAGCA  
AACGGGATTAGATAACCCCGTAGTCC

>Otu7165

CCAGCCTACGGGAGGCTGCAGTGAGGAATTTTGGACAATGAACGAAAGTTTGATCCAGCA  
ATATCACGTGAATGATGAAGTTTATTTATTTTATCGTAAAGTTCTTTCAATGAGGAGG  
ATAATGACGTTACTCATAGAAGAAGTCCTGACCAATCTCGTGCCAGCAGTCGCGGTAATA  
CGGGGAGGGCAAGCGTTATTCTACGTTACTGGGTGTAAAAAGTATTAAGGCGGTTTAATA  
AGTTTCTTTTGAAAGAATAGAATTCAATTCTAGAATTGACTGTAAATACTGTTAAACTTG  
AGTTTATTAGGAGATAGTTGTATGTTTAGTGTAGGTCTAAAATCCTTCGATATTAAAAAG  
ACATTCAATCGGTGAAGACTACTGTCTATAGTATAACTGACGTTGAAATACAAAAGCGTG  
AGGAGCAAACAGGATTAGAAACCCGTGTAGTCC

>Otu7169

CCAGCCTACGGGTGGCAGCAGTAGGGAATATTGGTCAATGGGTGAGAGCCTGAACCAGCC  
ATGCCGCGTGCAGGAAGAAGGCCTTCTGGGTGTAAACTGCTTTTGCCAGGGGATAAAAG  
ACCCTTGCGAGGGAAATTGAAGGTACCTGGTGAATAAGCCACGGCTAACTACGTGCCAGC  
AGCCGCGGTAATACGTAGGTAGCAAGCGTTGTCCGGATTTATTGGGTTTAAAGGGTGCCT  
AGGCGGTCCATTAAAGTCAGTTGTGAAATACGGCAGCTTAACTGTCGAGGTGCAATTGATA  
CTGGAGGACTTGAGTACAGACGAGGTAGGCGGAATTGACGGTGTAGCGGTGAAATGCATA

GATATGTCACAGAACACCAATTGCGAAGGCAGCTTGCTAAGTATGATTGACGCTGAGGCA  
CGGAAGCGTGGGGATCAAACAGGATTAGAAACCCGTGTAGTCC

>Otu7170

CCAGCCTACGGGATGCACCAGTGGGGAATCTTGGACAATGGGGGAAACCCTGATGGAGCG  
ACGCCGCGTGGGGGATGAATGGCTTCGGCCCGTAAACCCCTGTCATTTGCGAACAAACGG  
TATTGTCTAAGAGATGATGCCCTTGATAGTAGCGAAAGAGGAAGGGACGGCTAACTCTGTG  
CCAGCAGCCGCGGTAATACAGAGGTCCCAAGCGTTGTTTCGGATTCACTGGGCGTAAAGGG  
TGCGTAGGTGGTCGGGTAAGTCTGATGTGAAAGCTCGAAGCTCAACTTCGAAATGGCATT  
GGATACTATCCGGCTGGAGGGTCGGAGGGGGGACTGGAATTCTCGGTGTAGCAGTGAAAT  
GCGTAGATATCGAGAGGAACACCAGTGGCGAAGGCAGTCCCTGGACGACTCCTGACACT  
GAGGCACGAAAGCTAGGGGAGCAAACAGGATTAGAAACCCCTCGTAGTCC

>Otu7175

CCAGCCTATGGGTGGCAGCAGTGGGGAATATTAGACAATGGGCGAAAGCCTGATCTAGCA  
ACATTTTCGTGGAAGGAAGAAGGCCTCAGCTGTAATCTCCTATTTTCGATAATAACAATAAT  
GATTATAATTATAAAAGAAGCCCCGGTAAATATCTGTGCCAGCAGCCGCGGTAATGCAGG  
GGGGGCAAGTATTATTCTACATGACTGGGCGTAAAGGATATGTAGGTGGTTTTTTTAAATT  
TTATTAATAAAGCTATACTACAAATATAGACATTTTTTAAAATATTGTAAAACCTTTGAGTT  
TATACGAGATATTAGAAGCTTCTGGCGTTAGCAGTGAGATGTTTTTCATAACAGAGGGACTT  
CCTATTGGCGAAAGCAAATATCTAGTTAAAAGTACACTAAAATATGAAGGTTTGGGGAG  
CAAACAGGATTAGAAACCCCTAGTAGTCC

>Otu7176

CCAGCCTATGGGGTGCACCAGTCAGGAATATTGCGCAATGGAGGAAACTCTGACGCAGCG  
ACGCCGCGTGGGTGATGAAGGCCTTCGGGTCGTAAAGCCCTGTCGGAGGGGAAGAAAAGC  
TTGCTGGCTAATATCCAGCAGGCCCTTGACGGTACCCTCAAAGGAAGCACCGGCTAACTC  
CGTGCCAGCAGCCGCGGTAAGACGGAGGGTGCAAGCGTTGTTTCGGATTGACTGGGCGTAA  
AGGGCGTGTAGGCGGTTGGTCAAGTCCGATGTGAAAGCCCGGGGCTTAGCCTCGGAAAGTG  
CATCGGAAACTAGCCAGCTGGAGCGCGATAGAGGAGGGTAGAATTCCTGGTGTAGCGGTG  
AAATGCGTAGATATCAGGAGGAACACCTGTGGCGAAAGCGGCTCACTGGACCACAACCTGA  
CGCTGATGCACGAAAGCTAGGGGAGCAAACAGGATTAGATACCCTTGTAGTCC

>Otu7179

CCAGCCTATGGGGCGCTGCAGTGGGGAATATTGCGCAATGGGCGGAAGCCTGACGCAGCG  
ACGCCGCGTGAGGGATGACGGCCTTCGGGTGTAAACCTCTTTCAGCAGGGACGAAGAGT  
GATTGACGGTACCTGCAGAAGAAGCGCCGCCAACTACGTGCCAGCAGCCGCGGTAATAC  
GTAGGGCGCAAGCGTTGTCCGGAATTATTGGGCGTAAAGAGCTCGTAGGCGGTTTGTGCG  
GTCGGCTGTGAAATCCTGGGGCTTAAGTCCGGGTCTGCAGTCGATACGGGCAGACTTGAG  
TGTGGTAGGGGAGACTGGAATTCCTGGTGTAGCGGTGAAATGCGTAGATATCAGGAGGAA  
CACCGGTGGCGAAGGCGGGTCTCTGGGCCATTACTGACGCTGAGGAGCGAAAGCGTGGGG  
AGCGAACAGGATTAGAAACCCAGTAGTCC

>Otu7181

CCAGCCTACGGGGGGCAGCAGTGGGGAATATTGCGCAATGGGCGAAAGCCTGACGCAGCG  
ACGCCGCGTGAGGATGAAGGTCTTAGGATTGTAGACTTCTGTAAAGTGGGAAAAAAGAC  
TCATTCATAATACGGACGGGGGATGATTGTACCACTAGAGAAAGCACCGGCTAAACTCGT  
GCCAGCAGCCGCGGTAATACGAGTGGTGCAAGCGTTATTTCGGAATCATTGGGCGTAAAGG  
GTGCGTAGACGGTATGCTAAGTCTGCTGTAAATCCCTCGGCTTAACCGAGGATATGCGG  
CTGAAACTGGTGTACTTGAGGATGGAAGAGAGAAGTGAATTCCTCGGAGTAGCGGTAAAA  
TGCGTAGATCTCGAGAGGAACACCAATGGCGAAGGCAGCTTCTTGGTCCATTCTGACGT  
TGAGGCACGAAAGCGTGGGGAGCAAACAGGATTAGAAACCCAGTAGTCC

>Otu7186

CCAGCCTATGGGGGGCAGCAGTGGGGAATCTTCCGCAATGGGCGAAAGCCTGACGGAGCG  
ACACCGCGTGAGGATGACGCGTTTACTCGTGTAAGTCCCTTTTCTGTGGGAAGATAATG  
ACGGTACGACAGGAATAAGGGGCGGCAAACTACGTGCCAGCAGCCGCGGTAATACGTAGG  
CCCCAAGCGTTATCCGGAATTACTGGGTGTAAAGCGTCTGTAGGCGGGATAACAAGTCTT  
CCATGAAAGACCGGAGCTCAACTCCGCGTTTGTGGGAGATACTATTTTTCTAGAGTTAGG  
GAGAGGGAAGCGGAATGGTATGAGTAGGGGTGCAATCCGTTGATACATATCAGAACACCA  
AAAGCGAAGGCAGCTTCCTGGAAGTATATTGACGCTGAGAGACGAAAGCGTGGGGAGCGA  
AAAGGATTAGAAACCCAGTAGTCC

>Otu7190

CCAGCCTACGGGTGTCACCAGTGGGGAATTTTGGACAATGGGGGAAACCCTGATCCAGCA

ACTCTGCGTGAGGGACGAAGCCTCTCGGGGCGTAAACCTCTTTTATCTGGGACGAAAATCC  
CGCAAGGGTCTGACGGTACCAGGTGAATAAGCCACGGCTAACTATGTGCCAGCAGCCGCG  
GTAAGACATAGGTGGCGAGCGTTATTCGGAATTACTAGGCGTAAAGCGAGTGTAGGCGGG  
CGCTTAAGTCCGTTGTGAAATCTCCCGGCTTAAGTGGGAGGGGTCAACGATACTGGGTG  
TCTTGAGTGTGGTAGGGGGCAGTGGAAATCCCGGTGTAGCGGTGAAATGCGTAGATATCG  
GGAGGAACACCTATGGCGAAAGCAGCTGCCTGGGCCATTACTGACGCTAAGACTCGAAAG  
CTAGGGGAGCAAACAGGATTAGAAACCCGCGTAGTCC

>Otu7196

CCAGCCTATGGGAGGCAGCAGTTAGGAATCTTGGACAATGGACGCAAGTCTGATCCAGCC  
ATGCCGCGTGAGTGATGAAGGCCTTCGGGTGTAAAGCTCTTTAGCCGATGAATATAATG  
ACTGTAGTCGGAGAATAAGCCCCGGCTAACTTCGTGCCAGCAGCCGCGGTAATACGAAGG  
GGGCGAGCGTTGTTTCGAATCACTGGGCGTAAAGCGTGCGTAGGCGGCGATGAAAGTTAG  
AAGTGAAAGCCCAGGGCTTAACCTTGGAATTGCTTTTAAACTCCATTGCTCGAATCTCG  
GAGAGGATAGCGGAATTGTCACTGTAGCAGTGAAATGCGTAGATATTGACAGGAACACCA  
GTGGCGTAAGCGGCTATCTGGACGAGTATTGACGCTGAGGCACGAAAGCGTGGGGATCAA  
ACAGGATTAGATACCCCTCGTAGTCC

>Otu7201

CCAGCCTATGGGATGCTGCAGTCGGAATTTTCCACAATGGGCGAAAGCCTGATGGAGCA  
ACGCCGCGTGACAGGATGAATGCCTTCGGGTGTAAAGCTCTTTTATATGTGAAGATTATG  
ACGGTAGCATATGAATAAGGATCGGCTAACTCCGTGCCAGCAGCCGCGGTCATACGGAGG  
ATCCAAGCGTTATCCGGAATTACTGGGCGTAAAGAGTTGCGTAGGTGGCATAGTAAGTAG  
ACAGTGAAAGCGTGTGGCTCAACCATATACACATTGTCTAAACTGCTAAGCTAGAGTATG  
AGAGAGGTAGATGGAATTCCCTGTGTAGGAGTGAAATCCGTAGATATAGGGAGGAACACC  
GATGGCGTAGGCAGTCTACTGGCTCGTTACTGACACTCAGGCACGAAAGCGTGGGGAGCA  
AACGGGATTAGATACCCGGGTAGTCC

>Otu7202

CCAGCCTACGGGTTGCTGCAGGCGAGAATATTCCGCAATGGACGCAAGTCTGACGGAGCG  
ACGCCGCGTGATGGATGAAGTGCTTAGGTACGTAAACATCTTTTATCGGGGAAGAACTAA  
TTGACGGTACCCGATGAATAAGGGGCTCCTAACTCTGTGCCAGCAGGAGCGGTAATACAG  
AGGCCCCGAGCGTTACCCGGAATCACTGGGCGTAAAGGGTGTCCAGGCGGCCCTGTTAGT  
CTCTTGTAATAATCTATGGGCTCAACCTATAGCGCGCAAGGGAAACGGCAGGGCTCGAGGG  
CGCGAGAGGTACAGGGAACCTCATGGTGGAGGGGTGAAATCCGTTGATATCATGGGGAACA  
CCAAAGGCGAAGGCACTGTACTAGCGCGTTCCTGACGCTCACACACGAAAGCCAGGGGAG  
CGAACGGGATTAGAAACCCCCGTAGTCC

>Otu7207

CCAGCCTACGGGGCGCTCCAGTAGGGAATATTGGACGATGGCCGCAAGGCTGATCCAGCC  
ATGCCGCGTGACAGGAAGAAGGACCTATGGTTTGTAAGTCTTTTGTAACAGAGAAAACC  
CTCGTACGTGTACGGGGCTGATAGTATGGTAAGAATAAGCATCGGCTAACTTCGTGCCAG  
CAGCCGCGGTAATACGAAGGATGCAAGCGTTATCCGGATTTATTGGGTTTAAAGGGTGCG  
TAGGCGGACTTATAAGTCAGTGGTGAAATCTCGATGCTTAACATCGAACGTGCCATTGAT  
ACTGTAGGTCTTGAGTACAGATGCCGTTGGCGGAATGTGTCATGTAGCGGTGAAATGCAT  
AGATATGACACAGAACACCGATTGCGAAGGCAGCTGACGAAACTGTAAGTACGCTGAGG  
CACGAAAGCGTGGGGATCAAACAGGATTAGAAACCCCCGTAGTCC

>Otu7213

CCAGCCTACGGGACGCTCCAGTGGGGAATCTTGGACAATGGGGGCAACCCTGATCCAGCG  
ATGCCGCGTGAGTGAAGAAGGCCTTCGGGTGCTAAAGCTCTTTAGGTTGGGAGGAAGTCT  
AGTATTTTAAGAGATAACTAGATTGACTGTACCGACAGAATAAGCACCGGCAAGCTCTGT  
GCCAGCAGCCGCGGTAATACAGAGGGTGCGAGCGTTAATCGGATTTACTGGGCGTAAAGG  
GCGCGTAGGCGGTTGTATGAGTGTGATGTGAAAGCCCCGGGCTTAACCTGGGAAGTGCAT  
CGCAAACGATACGACTGGAGTAGGTGAGAGGGTGGCGGAATTTCCGGTGTAGCGGTGAAA  
TGCGTAGAGATCGGAAGGAACGTCAATGGCGAAGGCAGCCACCTGGTACCATACTGACGC  
TGAGGCGCGAAAGCGTGGGGATCGAACAGGATTAGATACCCCTGTAGTCC

>Otu7215

CCAGCCTATGGGTCGCACCAGTCGAGAATCTTTCACAATGGGGGCAACCCTGATGGAGCG  
ACGCCGCGTGAGGATAAGGTCTTCGGATTGTAAACTCCTGTCATGTGTGAACAAGGTTG  
TCGTGTTAATAGCATGGCAAAATTGATGGTAACACAAGAGGAAGAGACGGCTAACTCTGTG  
CCAGCAGCCGCGGTAATACAGAGGTCTCAAGCGTTGTTTCGGAATCACTGGGCGTAAAGG  
TGCGTAGGTGGCGTGGTAAGTCAGATGTGAAAGCCCCGGGGCTCAACCTCGGAATTGCATC

CGATACTACCATGCTAGAGTACTGAAGAGGTGACTAGAAATTCTCGGTGTAGCAGTGAAAT  
GCGTAGATATCGAGAGGAATACCAACGGCGAAGGCAGGTCCTGCGGCAGTTACTGGCACT  
GAGGCACGAAGGCCAGGGGAGCAAACGGGATTAGAAACCCCTTGTAGTCC

>Otu7217

CCAGCCTATGGGTGGCACCAGTGGGAATATTGGACAATGAGTGAAAGCTTGATCCAACAA  
TACTGAATTTGTGATGACGGCATTCTTTTGTCTGTAAAGCAATTTTGTGATGAGAATAATG  
ATGGTAGTCAAAGAAATAAGTCCCGGCCAATGCCGTGCCAGCAGCCGCGGGAATACGGTA  
GGGACAAACGTTATTCATATTTACTAGGCGTAAAGGGTACGTAGGTTGATTTATATCAAT  
ATTAAATAAATAACAAAAATTACGTTTGTCTTTTAATAATTAAGAAGGTAAATCTTGAGTT  
TTTATCGGGTTGGTAGTATTTTGTAGTAGGTTTGAATATCGCAAAAAGTGAAAGGACTG  
CTATACTAGCGAAGGCGACTTTCTGGATATTAAGTACGCTGAGGTACGGAGGTATAGGT  
ATCGAACGGGATTAGAGACCCCTTGTGGTCC

>Otu7218

CCAGCCTATGGGGGGCTGCAGTAGGGAATTTTGCAGCAATGGGGGAAACCCCTGACGCAGCA  
ACGCCATGTGTGGGATGAAGCATTCTCGGTGTGTAAACCACTGTCGGCAGGGAATAAAGCC  
CGCATTTATGCGGGGGTGAATGTACCTGCAAAGGAAGCCCCGGCTAACTTCGTGCCAGCA  
GCCGCGGTAATACGAGGGGGGCAAGTGTTGTTTCGGAATTACTGGGCGTAAAGGGAGCGTA  
GGCGGGCTCTTAAGTTGGATGTTTAAACCGGGGCCTAACCCCGGCGTGGCATCCAAAC  
TGGGAGTCTTGAATGGGACAGAGGCCAGTGGAATTAGAGGTGTAGCGGTGGAATGCGTAG  
ATATCTCTAAGAACACCAGTTGCGAAGGCGGCTGGCTGGGTCCACATTGACGCTGAGGCT  
CGAAAGCGTGGGGAGCAAACAGGATTAGAAACCCCCGTAGTCC

>Otu7221

CCAGCCTATGGGGGGCACCAGTCGAGAATTTTTCACAATGGACGAAAGTCTGATGGAGCG  
ACGCCGCGTGATTGATGAAGTCCTTCGGGACGTAAAGATCTTTTATGAGGGAAGAAGTTT  
ATTGACGGTACCTCATGAATAAGGGGCTCCTAATCTCGTGCCAGCAGGAGCGGTAATACG  
AGAGCCCCGAGCGTTATCCGGAATTATTGGGCGTAAAGGGTGTGTAGGTGGCATTGTTAG  
TCGTTTGTAAATCTCTGGGCTCAACCTAGAAATCGCGAACGAAACGGCAAAGCTTGAGA  
ATAGAAGGGGTGCGCGGAGCTCATGGTGTAGGGGTGAAATCCGTTGATATCATGGGGAAC  
ACCAAAGCGAAGGCAGCGCACTGGTCTATATCTGACACTGAAACACGAAAGCGTGGGTA  
GCGAATGGGATTAGAAACCCCTCGTAGTCC

>Otu7224

CCAGCCTATGGGGCGCTCCAGTGTAGGATATTGGACAATGTACTAAAAGTATGATCCAGT  
AATATTTTCATAAATGATATTGACAGTATTAACACTGTAAAATTTTATTACTAAAGATAAT  
TATGATGGTATTTTCGTAAATTAGCACC GGCTAACCCCTGTGCCAGCAGCCGCGGTAATACA  
GGTGGTGCAAACATTATTCATTTTAATTTGGTGTAAAGAATACGTAGATTGCCATTTTCTAG  
GTTAAAGAAAATTCTCATTAGGTTATGTGAATTAAAAAATTTATGTCTGGCTTTTGTAGTT  
CAATTGAGGTGGAAATAATTTTCGTATGTAGTGGTAAAATTTCTTATATATATGAAGGAATA  
TTAAAATAGTTGTGCAAACATTTTCTGAATTGAACTAACATTGAGGTATGAAGGTGTAG  
GTATCAAATGGGATTAGAAACCCCGCTAGTCC

>Otu7225

CCAGCCTATGGGTTGCACCAGTCGAGAATATTCGACAATGGGCGCAAGCCTGATCGAGCG  
ACGCCGCGTGCAAGGAAGAAGGAGCTTTGCTCTGTAAACTGCTTTTTCGTGGGAAGAAGTT  
TGACGGTACCACGAGAATAAGGGGTTGCTAACCTCGTGCCAGCAGCAGCGGTAATACGAG  
GACCCCGAGCGTTATCCGGAATTACTGGGCGTAAAGCGTGAGCATCCGGTCATGCTAGTC  
TCATGTTAAATCTCATTGCTCAACGATGAGACCGCGTGGGAAACGGCACGACTAGAGCGG  
GTAAGAGGCAGACGGAACGTGCAGTGTAGGGGTGAAATCCATTGATATTGCACGGAACAC  
CAAAAGCGAAAGCAGTCTGCTAGTGCTCTGCTGACGGTCAATCACTAAAGCGTGGGGATC  
AAAAAGGATTAGAAACCCCGTAGTCC

>Otu7227

CCAGCCTACGGGGTGCTCCAGTCGAGAATTTTTCACAATGGGGGAAACCCCTGATGGAGCG  
ACGCCGCGTGGGGGATGAATGGCTTCGGCCCGTAAACCCCTGTCATTTGCGAACAAATTG  
ATTCACTTAACACGTGAAGCATTGATAGTAGCGGAAGAGGAAGAGACGGCTAACTCTGTG  
CCAGCAGCCGCGGTAATACAGAGGTCTCAAGCGTTGTTTCGGATTTCATTGGGCGTAAAGGG  
TGCGCAGGCTGCGAGGTGAGTCGGACGTGAAATCCCGGGGCTTAACCCCGGAACTGCGTT  
CGATACTGCCTTGCTTGAGGACTGGAGAGGAGACTGGAATTCCTGGTGTAGCAGTGAAAT  
GCGTAGATATCAGGAGGAACGCCAATGGCGAAGGCAAGTCTCTGGACAGTTCTTGACGCT  
CATGCACGAAGGCTAGGGGAGCAAACGGGATTAGAAACCCCAGTAGTCC

>Otu7235



CCAGCCTACGGGGGGCTGCAGTAAGGAATATTGGACAATGGGGGCAACCCTGATCCAGCC  
ATGCCGCGTGAAGGATGAAGGCGCTATGCGTTGTAACTTCTTTTGAACGGGAGAAAACC  
CACCTACGTGTAGGTGGCTGATAGTACCGTTAGAATAAGGATCGGCTAACTCCGTGCCAG  
CAGCCGCGGTAATACGGAGGATCCAAGCGTTATCCGGATTCATTGGGTTTAAAGGGTGCG  
TAGGCGGACTGATAAGTCAGCGGTGAAATCTCTCAGCTTAACTGAGAACTGCCGTTGAT  
ACTGTTAGTCTTGAGTACAGATGATGTGGGCGGAATATGACATGTAGTGGTGAAATACTT  
AGATATGTCATAGAACACCGATTGCGAAGGCAGCTCACAAAACCTGTTACTGACGCTGAGG  
CACGAAAGCGTGGGGATCAAACAGGATTAGAACCCGAGTAGTCC

>Otu7236

CCAGCCTATGGGACGCTGCAGTGGGGAATATTGCGCAATGGGCGAAAGCCTGACGCAGCG  
ACGCCGCGTGGGGGATGACGCTTTTCGGAGTGTAACCCCTTTTCGATCGGGACGAATGCC  
TCGCAAGAGGAGTGACGGTACCGGTAGAAGAAGCCCCGGCTAACTACGTGCCAGCAGCCA  
CGGTAATACGTAGGGGGCCAGCGTTGCTCGGAATAACTGGGCGTAAAGGGTTCGTAGGCG  
GTGCGGCAAGTTGGGAGTGAAATCTCTGGGCTTAACCCAGAGACTGCTTTCAAAACTGCC  
GTGCTAGAGTGCGGGAGAGGCCAGTGGAATTGCAGGTGTAGCGGTGAAATGCGTAGATAT  
CTGCAGGAACACCCGTGGCGAAGGCGGCTGGCTGGACCGCAACTGACGCTGAGGAACGAA  
AGCTAGGGGAGCAAACAGGATTAGATACCCGAGTAGTCC

>Otu7238

CCAGCCTACGGGAGGCTCCAGTGGGGAATTTGTTGCAATGGGCGCAAGCCTGACGACGCA  
ACGCCGCGTGGAGGATGAAGACCTTCGGGTCGTAACTCCTTTTCGATCGAGACGAATGTT  
TTCTGGGTGAACAATCCGGAAGAGTGACGGTACCGAGAGAAGAAGCCCCGGCTAACTCTG  
TGCCAGCAGCCGCGGTAATACAGGGGGGGGCAAGCGTTGTTGCGGAATTACTGGGCGTAAA  
GGGCTTGTTAGGTGGCCAACTAAGTCAGACGTGAAATCCCTCAGCTTAACTGGGGAAGTGC  
GTCTGATACTGGATGGCTTGAGTGTGGGAGAGGGATGCGGAATTCAGGTGTAGCGGTGA  
AATGCGTAGATATCTGGAGGAACACCGGTGGCGAAGGCGGCATCCTGGACCAACACTGAC  
ACTGAGGAGCGAAAGCCAGGGGAGCAAACGGGATTAGAGACCCTCGTAGTCC

>Otu7241

CCAGCCTTGGGATGCTCCAGTCGAGAATCTTCCGCAATGGACGAAAGTCTGACGGAGCGA  
CGCCGCGTGGAGGATGAAGTGCTTCGGCATGTAACTCCTTTTGCCAGGGAAAAAGTTTA  
TTGATTGTACCTGGAGAATAAGAGGTTGCTAAACTCGTGCCAGCAGCAGCGGTAATACGA  
GTGCCTCGAGCGTTATCCGGAATCATTGGGCGTAAAGGGTGCGTAGGCGGCGATGTTAGC  
CTCCCGTAAAATCTCTGGGCTCAACCCAGAGTCCGCGGGAGATACGGCATTGCTAGAGGA  
TGGTAGGGGTCTCTGGAACCATGGTGTAGCGGTGAAATGCGTTGATATCATGGGGAAACA  
CCAAAAGCGAAGGCAAGAGACTGGACCACTCCTGACGCTGAAGCACGAAAGCGTGGGTGC  
CGAATGGGATTAGAGACCCTCGTAGTCC

>Otu7242

CCAGCCTATGGGGTGCAGCAGTGGGGAATCTTGCGCAATGGACGAAAGTCTGACGCAGCG  
ACGCCGCGTGGGTGATGAAGGCCTTCGGGTGTAAGCCCTGTGGGGAGGGACGAATAAG  
TAGAAGCTAACACCTTCTATGATGACGGTACCTCCTTAGCAAGCACCGGCTAACTCTGTG  
CCAGCAGCCGCGGTAAGACAGAGGGTGCAAACGTTGTTGCGGAATTACTGGGCGTAAAGCG  
TGTGTAGGCGGCTACGTAAGTCGGATGTGAAAGCCCTGGGCTCAACCCAGGAAGTGCAC  
TGATACTGCGCAGCTTGAGTCTCGGAGAGGTTGGTGGAATTCTCGGTGTAGAGGTGAAAT  
TCGTAGATATCGAGAGGAACACCGGTGGCGAAGGCGGCCAACTGGACGAAGACTGACGCT  
GAGACACGAAAGCGTGGGGAGCAAACAGGATTAGATACCCGCGTAGTCC

>Otu7244

CCAGCCTACGGGGGGCTGCAGTCGAGAATATTGCAATGGGCGAAAGCCTGATCGAGCG  
ACGCCGCGTGCAGGAAGAAGGCCTTCGGGTGTAAGCCCTGTGGGGAGGGACGAATTT  
GACGGTACCACGAGAATAAGGGGTTGCTAACTCTGTGCCAGCAGCAGCGGTAATACAGAG  
ACCCCGAGCGTTATCCGGAATTACTGGGCGTAAAGCGTGAGCAGCCGGTTGTATTAGTCT  
GGTGTCAAACCATGGGGCCCAACCCCATGCCTGCATTGGAAACGGTACAACCTCGAGTGGG  
TAAGAGGGAGGCGGAACGTATGGTGTAGGGGTGAAATCCACTGATATCATACGGAACACC  
AAAAGCGAAGGCAGCCTCCTAGTGCTCTACTGACGGTCAATCACTAAAGCGTGGGGATCA  
AAAAGGATTAGAAACCCGGGTAGTCC

>Otu7248

CCAGCCTACGGGTGGCAGCAGTAAGGAATATTGGTCAATGGGCGCAAGCCTGAACCAGCC  
ATGCCGCGTGGAGGATGAAGGCCCTCTGGGTGTAAGCTTCTTTTATTTGGGAAGAAAATC  
CATTTTTTCTAAGATGGTTGACGGTACCAGATGAATAAGCACCGGCTAACTCCGTGCCAG  
CAGCCGCGGTAATACGGAGGGTGCAAGCGTTATCCGGATTCCTGGGTTTAAAGGGTGCG

TAGGCGGGTTGGTAAGTCCGTGGTGAATCTCCAAGCTTAACTTGGAAACTGCCGTGGAT  
ACTCTCAATCTTGAATATAGTGGAGGTGAGCGGAATATGTCATGTAGCGGTGAAATGCTT  
AGATATGACATAGAACACCCATTGCGAAGGCAGCTCGCTACACTATTATTGACGCTGAGG  
CATGAAAGCGTGGGGATCAAACAGGATTAGAAACCCCAGTAGTCC

>Otu7252

CCAGCCTACGGGGTGCTGTCAGTGGGGAATATTGCGCAATGGGCGAATGCCTGACGCAGCG  
ACGCCGCGTGTGGGATGAAGGTCTTCGGATCGTAAACCACTGTCAGAGGGGACGAAGGCC  
CGGAGCTAACTACTATCGGGATTGACGGTACCCTCGGAGGAAGCACCGGCTAACTCTGTG  
CCAGCAGCCGCGGTAATACAGAGGGTGCGAGCGTTGTCCGGAATCACTGGGCGTAAAGGG  
CGTGTAGGCGGCTGGGTAAGCCGCGTGTGAAATCCCGGGGCTCAACCCCGGAACGGCACG  
CGGGACTGTCCGGCTAGAGAAATGGTAGAGGCGAGTGGAATTCCTGGTGTAGCGGTGGAAT  
GCGTAGAGATCGGGAAGAACACCGGTGGCGAAGGCGGCTCGCTGGGCCATTTCTGACGCT  
GAGGCGCGAAAGCGTGGGGAGCAAACAGGATTAGAAACCCCTGTAGTCC

>Otu7259

CCAGCCTACGGGGTGCAGCAGTGGGGGATCTTGCAGCAATGGGGGAAACCCTGACGCAGCG  
ACGCCGCGTGGGTGAAGAAGGCCCTTCGGGTGTAAAGCCCTGTCGAACGGGACAAATGTC  
TTCTGTGCTAATACCACAGAGGAGTGATGGTACCGTTAGAGGAAGCACCGGCTAACTCTG  
TGCCAGCAGCCGCGGTAATACAGAGGGTGCAAGCGTTGTTCGGAATCATTGGGCGTAAAG  
GGCAGGTAGGTGGTTTAGAAAGTCTACTGTGAAATCCCGGGCTTAACCTGGGAACTGCG  
GTGGAACTACTTAACTAGAGTGCTAGAGGGGTTCTGTGGAATACTCGGTGTGGCGGTGA  
AATGCGTAGATATCGAGTGGAATATCAGAGGCGAAGGCGACGAACTGGATAGTAACTGAC  
ACTCAACTGCGAAAGCGTGGGGAGCAAACAGGATTAGAAACCCCAGTAGTCC

>Otu7262

CCAGCCTACGGGTGGCAGCAGTCGAGAATCTTTCGCAATGGGCGCAAGCCTGACGAAGCG  
ACGCCGTGTGAGTGATGAAGGCCCTCGGGTCGTAAAGCTCTTTCATTTGGGAACAAAAGA  
AGCCGACAAATAATCGGCTAATTTGAGTGCTAGAGAAGAAGCACCGGCTAACTCCGT  
GCCAGCAGCTGCGGTAATACGGAGGGTGCAAGCATTAATCGGATTTATTGGGCGTAAAGG  
GCGCGTAGGCGGGATTGTAAGTCAGATGTGAAATCCCGGGGCTCAACCCCGGAACGGCAT  
TTGAAACTGCGATTCTTGAGGATAGGAGGAGAAAACGGAATTCACATGTAGCGGTGAAA  
TGCGTAGATATGTGGAAGAACACCAAGTGCGGAAGGCGGTTTTCTATCTTATACCTGACGC  
TGAGGCGCGAAAGCAAGGGGATCAAACAGGATTAGAAACCCGAGTAGTCC

>Otu7263

CCAGCCTACGGGGGGCAGCAGTCGAGAATCTTCCACAATGGACGAAAGTCTGATGGAGCG  
ACGCCGCGTGCAGGATGAAGTTCTTCGGGATGTAAACTGCTTTTATGAGCGAGAAAGTTT  
ATTGATCAGCTCATGAATAAGAGGTTGCTAAACTCGTGCCAGCAGCAGCGGTAATACGAG  
TGCCTCGAGCGTTATCCGGAATTATTGGGCGTAAAGGGTGTGTAGGTGGTCGTGTTAGTC  
CTTCGTAAAATTCTCTGGCTCAACCAGAGTACGCGCGGGATACGGCACGACTTGAGGGTG  
CGAGGGGTCTGTGGAATCATAGTGTAGCGGTGAAATGCGTTGATATTATGGGGAACACC  
AAAAGCGAAGGCAGCAGACTGGAGCATTCCTGACACTGAAACACGAAAGCGTAGGTAGCG  
AATGGGATTAGATACCCCGTAGTCC

>Otu7264

CCAGCCTATGGGACGCTCCAGTGGGGAATATTGGACAATGGGGGAAACCCTGATCCAGCA  
ATGCCGCGTGTGTGAAGAAGGTCTTCGGATTGTAAAGCACTTTTGGCAGGGACGATGATG  
ACGGTACCTGCAGAATAAGCCCCGGCTAACTTCGTGCCAGCAGCCGCGGTAATACGTAGG  
CAGCAAGCGTTGTTCCGAATTACTGGGCGTAAAGAGTGTGTAGGCGGTTCTCTATGTTCTG  
GTGTGAAATCTCCCGGCTTAACCTGGGAGGGTGCGCCGAAAACCTGGAGGGCTTGAGTATGG  
GAGAGGAAAGCGGAATTCCTGGTGTAGCGGTGAAATGCGTAGATATCAGGAGGAACACCT  
GCGGTGTAGACGGCTTTCTGGACCATCACTGACGCTGAGACACGAAAGCGTGGGTAGCAA  
ACAGGATTAGAGACCCGTGTAGTCC

>Otu7265

CCAGCCTATGGGGTGCAGCAGTAGGGAATATTGGTCAATGGGCGAAAGCCTGAATCAGCA  
ACGCCGCGTGTGAGTGACGAAGGCCCTTCGGGTCGTAAAGTTCTGTCTGACGGGAAGAAAAA  
ATGACGGTACCGTACAAGAAAGGACCGGCCAACTTCGTGCCAGCAGCCGCGGTAAGACGA  
GGGGTCTAGCGTTGTTCCGAATTACTGGGCGTAAAGCGCATGTAGGTGGCTTAATAAGT  
CAGATGTGAAAGCCTCGGGCTCAACCTGAGAAAGTGCAATTTGATACTGTTAAGCTTGAGTA  
TGGGAGAGGGTAGTAGAATTCCTGGTGTAGTGGTGAATACGTAGATATCAGGAGGAATA  
CCGGTGGCGAAGGCGGCTACCTGGCCCAATACTGACACTGAGATGCGAAAGCGTGGGGAT  
CAAACAGGATTAGATACCCGAGTAGTCC

>Otu7266

CCAGCCTATGGGGGGCAGCAGTCGAGAATTTTTCACAATGGACGAAAGTCTGATGGAGCG  
ACGCCGCGTGAGGATGAAGGTTTTTCGGATTGTAAACTCCTGTCACTGCAGAACAAGGAT  
GGGCGGTTGAACAGACCGCCCATTTGATGGTATGCGGAGAGGAAGGGACGGCTAACTCTG  
TGCCAGCAGCCGCGGTAAGACAGAGGTCCCGAGCGTTGTTTCGGATTCAATTGGGCGTAAAG  
GGTGTGTAGGAGGTCGGGTAAGTCAGGTGTGAAATCTCACAGCTTAACTGTGAAACTGCG  
CTTGATACTGCCCGGCTAGAGGATCGGAGGGGGTAACGGAATTTATGGTGTAGCAGTGAA  
ATGCGTAGATATCATAAGGAACACCGGTGGCGAAGGCGGCTACCTGGACAATTGCTGACG  
CTCAGGCACGAAAGCGTGGGGAGCAAAAGGGATTAGAGACCCTAGTAGTCC

>Otu7269

CCAGCCTACGGGGGGCACCAGTCGAGGATCTTCGGCAATGGGCGCAAGCCTGACGACGCA  
ACGCCGCGTGAGGATGAAGACCTTCGGGTCGTAAACTCCTTTTCGATCGAGACGAATGGC  
CTTCGGGTTAATAACCTGAAGGAGTGACGGTACCGAGAGAAGAAGCCCCGGCTAACTCCG  
TGCCAGCAGCCGCGGTAATACGGGGGGGGCAAGCGTTGTTTCGGAATTACTGGGCGTAAAG  
GGCACGTAGGTGGCCAACTAAGTCAGACGTGAAATCCCTCGGCTTAACCGGGGAACTGCG  
TCTGATACTGGATGGCTTGAGTTTGGGAGAGGGATGCGGAATTCAGGTGTAGCGGTGAA  
ATGCGTAGATATCTGGAGGAACACCGGTGGCGAAGGCGGCATCCTGGACCAACACTGACA  
CTGAGGAGCGAAAGCCAGGGGAGCAAAACGGGATTAGAAACCCGCGTAGTCC

>Otu7275

CCAGCCTACGGGTTGCACCAGTGGGGAATATTGGACAATGGGGGCAACCCTGATCCAGCA  
ATGCCGCGTGAGTGAAGAAGGCCTTCGGGTGTAAAACCTCTTTTGTAGGGGAAGATGATG  
ACTGAACCTAACGAATAAGCCCCGGCTAACTTCGTGCCAGCAGCCGCGGTAATACGAAGG  
GGGCTAGCGTTGTTTCGGAATGACTGGGCGTAAAGGGTGTGTAGGCGGTTATACACGTCAG  
ATGTGAAATCCCTGGGCTCAACCTGGGAATGGCATTTCGATACGGTAGAGCTAGAGATTGG  
TAGAGGGTAGAGGAATTGCGAGTGTAGAGGTGAAATTCGTAGAGATTGCGAGGAACACCG  
GTGGCGAAGGCGGCTACCTGGGCCAATACTGACGCTGAGGCACGAGAGCGTGGGGAGCAA  
ACAGGATTAGAAACCCCTGTAGTCC

>Otu7277

CCAGCCTACGGGGGGCTCCAGTGAGGAATATTGCCCAATGGGCGCAAGCCTGAGGCAGCG  
ACGCCGCGTGGGTGAAGAAGGCCTTCGGGTCGTAAAGCCCTTTTCTGCGTGACGAGACAA  
GGACGGTAGCGCAGGAAAAAGTCTCGGCTAACTACGTGCCAGCAGCCGCGGTAACCGTA  
GGAGGCAAGCGTTATCCGGAGTTACTGGGCGTAAAGCGTGCGTAGGCGGGAAGATAAGTG  
GGTGGTGAAAGCGCCCGGCTAAACCGGGCGATGTCCATTGACTGTCTTTCTAGAGGCG  
GATAGAGGAGTGCGGAATTCCGGGTGTAGCGGTGAAATGTGTAGAGATCCGGAGGAACAC  
CAGTGGTGCAAACGGCGCTCTGGGTCCGTACTGACGCTGAAGCACGAAAGCGTGGGTAGC  
AAACAGGATTAGATACCCTTGTAGTCC

>Otu7280

CCAGCCTATGGGAGGCAGCAGTTAGGAATATTGGACAATGGACGCAAGTCTGATCCAGCC  
ATGCCGCGTGAGCGATGAAGGCCTTCGGGTGTAAAGCTCTTTAGCCGACGAATATAATG  
ACTGTAGTCGGAGAATAAGCCCCGGCTAACTTCGTGCCAGCAGCCGCGGTAATACGAAGG  
GGGCGAGCGTTGTTTCGGAATCACTGGGCGTAAAGAGTGCGTAGGCGGTTGTGAAAGTTAG  
GAGTGAAAGCCCCAGGCTCAACTTGGAATTGCTCTTAAAACTCCACAACCTCGAATTCGG  
GAGAGGATAGCGGAATTGTCAGTGTAGCAGTGAAATGCGTAGATATTGACAGGAACACCA  
GTGGCGTAAGCGGCTATCTGGACCGACATTGACGCTGAGGCACGAAAGCGTGGGGATCAA  
ACAGGATTAGAAACCCCTCGTAGTCC

>Otu7282

CCAGCCTATGGGAGGCACCAGTCAAGAACATTTCGACAATGGGCGAAAGCCTGATCGAGCG  
ACGCCGCGTGAGGATGAAGGCCTTCGGGTGTAAACTACGGTAGATAGTTAATAATGTA  
AATGAATGACTATCGGAAAGAGGTTGGTAACCTACGTGCCAGCACCCGCGGTAATACGTAG  
ACCTCAAGCGTTATCCGGATTTATTGGGCGTAAAGCGCGTGTAGGAGGTTTTGTGCGTCT  
TTCGTTAAAGCCCCGGGCGCTAACCCCGGAAATGCGGGAGATACGACAAGACTAGAGGAGG  
TTAGAGGCGCATGGAACAAATGGTGTAGGGGTGAAATCCGTTGATATCATTTGGAACACC  
AAAGGCGAAGGCAGTGCCTGGGACCTTCTGACTCTGAGACGCGAAAGCGTGGGGAGCA  
AAAAGGATTAGAAACCCCTCGTAGTCC

>Otu7283

CCAGCCTACGGGTGGCACCAGTAGGGAATATTGGACAATGGGCGCAAGCCTGATCCAGCC  
ACGCCGCGTGAGTGATGAAGGCCTTCGGGTCGTAAAGCTCTGTGGGGAGGGACGAACCGC  
TGTTGGTTTCATAACCAGCAGCATGACGGTACCTCCTTAGCAAGCACCGGCTAACTTCGTG

CCAGCAGCCGCGGTAATACGAAGGGTGCAAACGTTGCTCGGAATTATTGGGCGTAAAGCG  
CACGTAGGCGGCTAGAAAAGTTGGATGTGAAATCCCTCGGCTTAACCAAGGAAGTGCATC  
CAAACTGCCTAGCTTGAGTACTTAAGAGGATCGCGGAATTCCCGGTGTAGAGGTGAAAT  
TCGTAGATATCGGGAGGAACACCAGTGGCGAAGGCGCGATCTGGGAAGATACTGACGCT  
GAGGTGCGAAAGCGTGGGGAGCAAACAGGATTAGATACCCCCGTAGTCC

>Otu7286

CCAGCCTACGGGGTGTCAGCAGTGGGGAATATTGGACAATGGGCGAAAGCTTGATCCAACG  
ATATCATATTAGAGATGAAGGGTGTAACTTGTAAATCTGGATAGCTAAAGAAAATTATG  
ATATTATTTAGCGAATTTAGCCCTGGCTAACTTCGTGCCAGCAGCTGCGGTAATACGGAG  
GGGCGAGTGTTACTCGTATTGATTGGGCGTAAAGGGTATGTAGGCGGTTTAGTAAGTTC  
TTGATAAAATATCTTTATAAAGTAAAGAAAATGATTGAATACTGCTAACTGGAGTTTGA  
TGGGAGTGATTAGTACTGTAAATGGAGGGGTAAAATCCAGCAAATTTATAGGACTGGCA  
GAAGGCGAAGGCAATGAACATATTTAACTGACGCTGAGGTACGAAAGCATAGGGATCAA  
AAAGGATTAGAGACCCTAGTAGTCC

>Otu7287

CCAGCCTATGGGGGGCAGCAGTAAGGAATATTGGTCAATGGGCGCAAGCCTGAACCAGCC  
ATGCCGCGTGCAGGAAGACGGCCCTACGGGTTGTAACTGCTTTTATTTCGTGAATAAATC  
TTTCTACGTGTAGGAAGCTGAAAGTAGCGAAAGAATAAGGATCGGCTAACTCCGTGCCAG  
CAGCCGCGGTAATACGGAGGATCCAAGCGTTATCCGGATTATTGGGTTTAAAGGGTGCG  
TAGGCGGATTATTAAGTCAGAGGTGAAATTTTGGCGCTCAACCGTAAGCTTGCCTTTGAT  
ACTGATGATCTTGAATTAACCTGAGGTAGGCGGAATGTGACAAGTAGCGGTGAAATGCAT  
AGATATGTACAGAACACCAATTGCGAAGGCAGCTTACTAAGGTTATATTGACGCTGAGG  
CACGAAAGCGTGGGGATCAAACAGGATTAGATACCCCCGTAGTCC

>Otu7289

CCAGCCTACGGGGCGCACCAGTCGAGAATTTTTCTCAATGGGCGAAAGCCTGAAGGAGCG  
ACGCCGCGTGGGGGATGAATGGCTTCGGCCCGTAAACCCCTGTCATTTGCGAACAAACCT  
TTTCATTTAATATGTGAAAAGCTGATTGTAGCGAAAGAGGAAGAGACGGCTAACTCTGTG  
CCAGCAGCCGCGGTAATACAGAGGTCCCAAGCGTTGTTTCGGATTCACTGGGCGTAAAGGG  
TGCGTAGGCGGTGAGGTAAGTCTGACGTGAAATCTCCGGGCCTAACCCGAAACTGCGTT  
GGATACTATCTCGCTAGAGGAATGGAGGGGAGACTGGAATACTTGGTGTAGCAGTGAAAT  
GCGTAGATATCAAGTGGAACACCAGTGGCGAAGGCGAGTCTCTGGACATCTCCTGACGCT  
GAGGCACGAAAGCCAGGGGAGCAAACGGGATTAGAGACCCTCGTAGTCC

>Otu7290

CCAGCCTATGGGAGGCTGCAGTCGAGAATTTTTCACAATGGACGAAAGTCTGATGGAGCG  
ACGCCGCGTGGAGGATGAAGGTTTTCGGATTGTAACTCCTGTCACTGCAGAACAAGGAT  
GTGCCAGTTAACAGCCGGCGCATTTGATGGTATGCGGAGAGGAAGGGACGGCTAACTCTG  
TGCCAGCAGCCGCGGTAAGACAGAGGTCCCGAGCGTTGTTTCGGATTCAATTGGGCGTAAAG  
GGTGTGTAGGAGGTTGGGTAAGTCAGGTGTGAAATCTCAGAGCTTAACTCTGAAACTGCG  
CTTGATACTGCTCGGCTAGAGGATCGGAGGGGGTAACGGAATTCATGGTGTAGCAGTGAA  
ATGCGTAGATATCATGAGGAACACCGGTGGCGAAGGCGGTTACCTGGAAGATTCTCTGACT  
CTGAAATACGAAAGCGTGGGGAGCAAAAAGGATTAGAAACCCGTGTAGTCC

>Otu7294

CCAGCCTACGGGGTGCTGCAGTGGGGAATCTTGGACAATGGGGGAAACCCTGATCCAGCC  
ATGCCGCGTGAGTGATGAAGGCCTTAGGATTGTAAAGCTCTTTCGACGGGGACGATGATG  
ACGGTACCCGTAGAAGAAGCCCCGGCTAACTTCGTGCCAGCAGCCGCGGTAATACGAAGG  
GGGCTAGCGTTGCTCGGAATGACTGGGCGTAAAGGGCGCGTAGGCGGTTTGTACAGTCAG  
ATGTGAAATTCCTGGGCTCAACCTGGGGGCTGCATTTGATACGTATGGACTGGAGTGAGG  
AAGAGGGTCGTGGAATTCACAGTGTAGAGGTGAAATTCGTAGATATTGGGAAGAACACCG  
GTGGCGAAGGCGGCGACCTGGTCCTTTACTGACGCTGAGGCGCGAAAGCGTGGGGAGCAA  
ACAGGATTAGAGACCCGCGTAGTCC

>Otu7304

CCAGCCTATGGGGGGCACCAGTCGAGGATCTTTGGCAATGAGCGCAAGCTTGACCAAGCG  
ACGCCGCGTGTGCGATGAAGGCCTTCGGGTGTAAAGCACTGTGAGGGGAACGAAGCCG  
AAAGGTTGACCGATCCCTGGAGGAAGCACGGGCTAAGTTCGTGCCAGCAGCCGCGGTAAG  
ACGAACCGTGCGAACGTTGTTTCGGAATCACTGGGCTTAAAGGGCGCGTAGGCGGCTCGTC  
AAGTCGGGGGTGAAATACTCCAGCTCAACTGGAGAAGTGCCTTCGAAACTGACGAGCTCG  
AGGGAGGTAGGGGTATGTGGAACCTTCTGGTGGAGCGGTGAAATGCGTTGATATCAGAAGG  
AACGCCGGTGGCGAAAGCGGCTCACTGGATCTCTTCTGACGCTGAGGCACGAAAGCTAGG

GTAGCGAACGGGATTAGAAACCCCGTAGTCC

>Otu7305

CCAGCCTATGGGTCGCTGCAGCCGAGAATATTCGACAATGGGCGAAAGCCTGATCGAGCG  
ACGCCGCGTGATTGATGAAGTCTTTCGGGATGTAAAGATCTTTTATAGGGGAGAAAGCCA  
TGTTGCCATGGTTGATGGTACTCTATGAATAAGGGGTGCTAAACTCGTGCCAGCAGCA  
GCGTAATACGAGTGCCCCGAGCGTTATCCGGAATTATTGGGCGTAAAGGGTGTGTAGGT  
GGTTGTGTTAGTCTTCTGTAAATTCTTCGGCTTAACCGGGACCTGCGGAAGAAACGGC  
ACGACTAGAGAGTGCGAGAGGTGAGCGGAACCTCATGGTGTAGGGGTGAAATCCGTTAATA  
TGATGGGGAACACCGAAGGCGAAGGCAGCTCACTGGCGTACTTCTGACACTGAAACACGA  
AAGCGTGGGTAGCGAATGGGATTAGAAACCCTAGTAGTCC

>Otu7306

CCAGCCTATGGGGGGCTGCAGTGGGGAATTTTGGACAATGGGGGCAACCCTGATCCAGCA  
ATGCCGCGTGTTGAAGAAGGCCTTCGGGTGTAAAGCACTTTTGTCTGGGAAAGAAATCA  
TCCTGGCTAATATCCGGGGTGGATGACGGTACCGGAAGAATAAGCACCGGCTAACTCTGT  
GCCAGTAGCCGCGTAATACAGAGGGTGCAGCGTTAATCGGAATTACTGGGCGTAAAGC  
GTGCGTAGACGGTTTCGTAAAGTCGGATGTGAAATCCCCGGGCTCAACCTGGGAATTGCAT  
TCGAAACTGCAAAGCTAGGGTGCAGGAAGAGGGAAGCGGAATTTCCGGTGTAGCGGTGAAA  
TGCGTAGATATCGGAAGGAACATCAGTGGCGAAAGCGGCTTCCTGGTCCAGCACCGACGT  
TCAGGCACGAAAGCGTGGGGAGCAAACAGGATTAGATAACCCAGTAGTCC

>Otu7308

CCAGCCTATGGGATGCTGCAGTCGAGAATCTTCCGCAATGGACGAGAGTCTGACGGAGCG  
ACGCCGCGTGATTGATGAAGCACTTCGGTGCGTAAAGATCTTTTATGAGGGAAGAAGTTT  
ATTGACTGTACCTCATGAATAAGGGGCTCCTAATCTCGTGCCAGCAGGAGCGGTAATACG  
AGAGCCCCAAGCGTTATCCGGAATTATTGGGCGTAAAGGGTGTGTAGGTGGTTGTGTTAG  
TCTTTCGTCAAACTCTCCGAGCTTAACCTTGGAGTCTGCGAGGGAAACGGCACGACTAGAAA  
GTGCGAGAGGTGTACGGAACCTCATGGTGTAGGGGTGAAATCTGTTGATATCATGGGGAAC  
ACCAAAGGCGGAGGCAGTACACTGGCGCATATTTGACACTCAAACACGAAAGCGTGGGTA  
GCGAATGGGATTAGAAACCCGAGTAGTCA

>Otu7310

CCAGCCTACGGGGGGCAGCAGCAAGGAATATTGGTCAATGGGCGAGAGCCTGAACCAGCC  
ATGCCGCGTGACAGGAAGAAAGCCCTCCGGGTGTAAACTGCTTTTGTACGGGAAGAAACC  
CCGCCACGTGTGGCGGGTTGACGGTACTGTAAGAATAAGGATCGGCTAACTTCGTGCCAG  
CAGCCGCGGTAATACGAAGGATCCAAGCGTTATCCGGATTTATTGGGTTTAAAGGGTGC  
TAGGCGGCTTATTAAGTCAGTGGTGAAGCCCGATGCTTAACATCGGAACGCCATTGAT  
ACTGATGAGCTTGAATATACTTGAGGTAGGCGGAATGTGTCATGTAGCGGTGAAATGCTT  
AGATATGACACAGAACACCGATTGCGAAGGCAGCTTGCTAAAGTATGATTGACGCTGAGG  
CACTAAAGCGTGGGGATCAAACAGGATTAGAAACCCCGTAGTCC

>Otu7313

CAGCCTATGGGACGCAGCAGTCAAGAACCTTCCACAATGGACGAAAGTCTGATGGAGCGA  
CGCCGCGTGGTTGATGAAGTCCTTCGGGACGTAAAGACCTTTTATGAGGGAAGAAGTTTA  
TTGACGGTACCTCATGAATAAGGGGCTCCTAATCTCGTGCCAGCAGGAGCGGTAATACGA  
GAGCCCCGAGTGTTATCCGGAATTATTGGGCGTAAAGGGTGCAGAGGTGGTTGTGTTAGT  
CATATGTTAAACCCAGGCTCAACTTGGGGACTGCATTTGAAACGGCACGACTAGAGGA  
TGTGAGAGGTGTACAGAACCTCATGGTGTAGGGGTGAAATCCGTTGATATCATGGGGAATA  
CCAAAAGCGAAGGCAGTACACTGGTGCATACCTGACACTCCAGCACGAAAGCGTGGGTAG  
CGAATGGGATTAGATAACCCGAGTAGTCC

>Otu7314

CCAGCCTACGGGTCGCTGCAGTAGGGAATATTGGACAATGGGCGCAAGCCTGATCCAGCC  
ATCCCGCGTGAAAGGATTAAGGCCCTCTGGGTGTAAACTCTTTTTTTGGGGAATAAAAA  
CTGGGATTTATCTCGGCTTGAAGGTACCCGAAGAATAAGCACCGGCTAACTCCGTGCCAG  
CAGCCGCGGTAATACGGAGGGTGCAAGCGTTATCCGGATTAACCTGGGTTTAAAGGGTGC  
TAGGTGGCTTTGTAAGTCAGTGGTGAATCTCGGAGCTTAACCTCCGAAACTGCCATTGAC  
ACTGCTTAGCTTGAATCAAGTAGAGGTGGATGGAATATTACATGTAGCGGTGAAATGCTT  
AGATATGTAATAGAACACCGATTGCGAAGGCAGTTCACATATGCTTGTATTGACACTGAGG  
CACGAAAGCGTGGGGATCAAACAGGATTAGAAACCCCGTAGTCC

>Otu7315

CCAGCCTATGGGTGGCTCCAGACGAGAATATTCGACAATGGGCGAAAGCCTGATCGAGCG  
ACGCCGCGTGAGAGGATGAAGTGCTTCGGCATGTAAACTCCTTTTGCCAGGGAAAAAGTTT

ATTGATTGTACCTGGAGAATAAGAAGTTGCTAAACTCGTGCCAGCAGCAGCGGTAATACG  
AGTGCTTCGAGCGCTATCCGGAATCATTGGGCGTAAAGGGTGCGTAGGCGGCAGTGTTAG  
TCTCGCGTAAATCTTCCGGCTCAACCGGGAGTCTGCGCGGGAACGGCACAGCTAGAGG  
ACGGCAGAGGTCTCTGGAACCTCATGGTGTAGCGGTGAAATGCGTTGATATCATGGGGAAC  
ACCGAAAGCGAAGGCAAGAGACTGGGCCGCTCCTGACGCTGAAGCACGAAAGCGTGGGTC  
GCGAATGGGATTAGAGACCCCCGTAGTCC

>Otu7321

CAGCCTACGGGAGGCTGCAGTAAGGAATATTGGACAATGGGGGCAACCCTGATCCAGCCA  
TGCCGCGTGGAAGGATGAAGGCCCTCTGGGTGTAAACTTCTTTTATGCGGGAATAAACCC  
CTCTACGTGTAGAGGGTTGAATGTACCGTAAGAATAAGGATCGGCTAACTTCGTGCCAGC  
AGCCGCGGTAATACGAAGGATCCAAGCGTTATCCGGATTTATTGGGTTTAAAGGGTGCCT  
AGGCGGGCTATTAAGTCAGTGGTGAACACCCCAAGCTTAACTTGGGAACTGCCATTGATA  
CTGATGGTCTTGAGTACACTTGAAGTGGGCGGAATGTGTTCATGTAGCGGTGAAATGCTTA  
GATATGACACAGAACACCGATTGCGAAGGCAGCTCACTAAATTGTAAGTACGCTGAGGC  
ACGAAAGCGTGGGGATCAAACAGGATTAGAGACCCCCGTAGTCC

>Otu7332

CCAGCCTACGGGAGGCTGCAGTGGGGAATCTTGCGCAATGGGCGAAAGCCTGACGCAGCA  
ACGCCGCGTGCGGGATGACGGCCTTCGGGTGTAAACCGCTTTCAGGAGGGACGAAAATG  
ACGGTACCTTCAGAAGAAGCCCCGGCTAACTACGTGCCAGCAGCCGCGGTAATACGTAGG  
GGGCAAGCGTTGTCCGGATTTATTGGGCGTAAAGAGCTCGTAGGTGGTTCCGTAAGTCGC  
GAAGTCAAATCTCTGGGCTCAACCCAGAATCGCTTCCGATACTGCGGTGACTGGAGTCCG  
GTAGGGGAGCGTGGAATTCCTGGTGTAGCGGTGAAATGCGCAGATATCAGGAGGAACACC  
AACAGCGAAGGCAGCGCTCTGGGCCGGTACTGACACTGAGGAGCGAAAGCGTGGGGAGCG  
AACAGGATTAGATACCCAGTAGTCC

>Otu7333

CCAGCCTACGGGTGGCAGCAGTAAGGGATATTGCACAATGGGCGCAAGCCTGATGCAGCA  
ACGCCGCGTGGGGGAAGAAGGCCTTCGGGTGCTAAACTCGTTTTGCGTCTGAAGAGGAAG  
GACGTTAGGACGCGAATAAGTCACGGCTAACTACGTGCCAGCAGCCGCGGTAACAGTAG  
GTGGCGAGCGTTATCCGGATTTACTGGGCGTAAAGGGTGTGCAGGCGGGAGTACAAGTGG  
TGTATGAAAGGGCCGCGCTTAACGTGGCTAGGTTATGCCAGACTGTGCTTCTAGAGGGCG  
AGAGAGGGGCGTGGAATTCGGGTGTAGTGGTGAATGCGTAGAGATCCGGAAGAACCCC  
AGAGGCGAAGGCGGCGCCCTGGCTCGCACCTGACGCTCAGCCACGACAGCATGGGGAGCG  
AACGGGATTAGAGACCCGCGTAGTCC

>Otu7336

CCAGCCTATGGGACGCAGCAGTCGAGAATTTTTTACAATGGGGGAAACCCTGATGGAGCG  
ACGCCGCGTGGAAGGATGAAGGTTTTCGGATTGTAAACTCCTGTCACTGCAGAACAAGGGT  
GTGTTTCGTTAATAGCGAATGCATTTGATGGTATGCGGAGAGGAAGGGACGGCTAACTCTG  
TGCCAGCAGCCGCGGTAAGACAGAGGTCCCGAGCGTTGTTTCGGATTCATTGGGCGTAAAG  
GGTGTGTAGGAGGTGCGGTAAGTCAGGTGTGAAATCTCAGAGCTCAACTCTGAGACTGCG  
CTCGATACTGCCCGGCTAGAGGATCGGAGGGGGTATCGGAATTTATGGTGTAGCAGTGAA  
ATGCGTAGATATCATAAGGAACACCGGTGGCGAAGGCGGATACCTGGAAGATTCTCTGACT  
CTGAAACACGAAAGCCAGGGGAGCAAACGGATTAGAGACCCTCGTAGTCC

>Otu7337

CCAGCCTATGGGTGCTGTCAGTCGAGGATCTTCGGCAATGGGCGCAAGCCTGACCGAGCG  
ACGCCGCGTGTCGATGAAGGCCTTCGGGTGTAAAGCACTGTGAGGGGGAGGAAAGCC  
GAAAGGTCTGACCTATCCCTGGAGGAAGCACGGGCTAAGTTCGTGCCAGCAGCCGCGGTA  
AGACGAACCGTGCGAACGTTGTTTCGGAATCACTGGGCTTAAAGGGCGCGTAGGCGGCTGG  
CAAAGTCCGGGGTGAAAGCCCCCAGCTCAACTGGGGAAGGGCCTCGGATACTGGTCAGCT  
CGAGGGAGGTAGGGGCGGATGGAACCTCCGGTGGAGCGGTGAAATGCGTTGATATCGGAA  
GGAACGCCGGTGGCGAAAGCGATCCGCTGGCCCTCTACTGACGCTGAGGCGCGAAAGCCA  
GGGGAGCAAACGGGATTAGAGACCCCGGTAGTCC

>Otu7346

CCAGCCTATGGGTGGCACCAGTAGGGAATTTTCCACAGTGGGCGAAAGCCTGATGGAGCA  
ACGCCGCGTGCAAGGATGAATGTCTTCGGATTGTAAACTGCTTTTATCTGTGACGAATATG  
ACGGTAGCAGATGAATAAGGATCGGCTAACTCCGTGCCAGCAGCCGCGGTCATACGGAGG  
ATCCAAGCGTTATCCGGAATTACTGGGCGTAAAGAGTTGCGTAGGTGGCAGAGTAAGCGA  
ATAGTAAAATGATGTGGCTCAACCATATGTCTATTATTTGAACTGCTCAGCTAGAGGACG  
AGAGAGGTTATTGGAATTCCTAGTGTAGGAGTGAATCCGTAGATATTAGGAGGAACACC

GATGGCGTAGGCAGATAACTGGCTCGTTCTTGGCACTAAGGCACGAAAAGCGTGGGTAGCA  
AACGGGATTAGAAACCCGTGTAGTCC

>Otu7353

CCAGCCTATGGGGTGCTGCAGTCGAGGATCATTCGCAATGGGCGAAAGCCTGACGATGCG  
ACGCTGTGTGAATGATGAAGGCCTTCGGGTGTAAAGTTCTTTTCGCTTAGGAACAAGAGA  
GGCACGTGAACAACGAGCCGATTTGAGGGTACTAGGTAAAGAAGCACCGGCTAACTCCGT  
GCCAGCAGCTGCGGTAATACGGAGGGTGCAAGCATTAATCGGATTTATTGGGCGTAAAGG  
GCGCGTAGGCGGATTTCGTAAGTCAGATGTGAAATTCCTAGGCTCAACCTAGGAGCTGCAT  
TTGAAACTGTGAGTCTTGAGGATTGGCGGAGAAAATGGAATTCACGTGTAGCGGTGAAA  
TGCGTAGATATGTGGAAGAACATCGGTGGCGAAAGCGGTTTTCTAGCTTAGACCTGACGC  
TGAGGCGCGAGAGCAAGGGGAGCAAACAGGATTAGATAACCCCGTAGTCC

>Otu7355

CCAGCCTACGGGGGGGCTGCAGTGGGGAATATTGAACAATGCCCCGAAGGGTGATCCAGCC  
ATGCCGCGTGCAGGAAGAAGGCCCTATGGGTGTAAACTGCTTTTACACCGGAGAAAACC  
CCCTTTTCGTGAAAGGGGCTGATAGTATGGTGAGAATAAGCATCGGCTAACTTCGTGCCAG  
CAGCCGCGGTAAGACGAAGGATGCAAGCGTTATCCGGATTTATTGGGTTTAAAGGGAGCG  
TAGGTGGCCTTATAAGTCAGCGGTGAGAGACTAGAGCTTAACTCTGGAATTGCCATTGAT  
ACTGTAGGGCTTGAGTATAGTTGCTGTGGGCGGAATATGACATGTAGTGGTGAATACTT  
AGAGATGTCATAGAACACCGATTGCGAAGGCAGCTCACAAACTATAACTGACACTGAGG  
CTCGAAAGTGCGGGGATCAAACAGGATTAGAAACCCCAGTAGTCC

>Otu7356

CCAGCCTACGGGATGCAGCAGTGAGGAATCTTCCGCAATGGGCGAAAGCCTGACGGAGCA  
ACACCGCGTGCAGGATGACGGCTTTCGGGTGTAAACTGCTTTTATTTGGGAAGATTATG  
ACGGTACCAAATGAATAAGGACCGGCTAACTACGTGCCAGCAGCCGCGGTAATACGTAGG  
GTCCAAGCGTTATCCGGAATCACTGGGCGTAAAGCGTACGTAGGCGGATGTTTAAAGTGCA  
ACATGAAATCCCGTGGCTCAACCATGTGGACTGTATTGCATACTGGACGTCTTGAGGACA  
TGAGAGGCAAGTGGAATTACTGGTGTAGCAGTGAAATGCGTAGAGATCAGTAGGAACACC  
AATGGCGAAGGCAGCTTGCTGGCATGTATCTGACGCTAAGGTACGAAAGCGTGGGGAGCG  
AACAGGATTAGAGACCCGTGTAGTCC

>Otu7357

CCAGCCTATGGGGGGCACCAGTGGGGAATTTTTCGCAATGGGCGAAAGCCTGACGCAGCG  
ACGCCGCGTGTGCGATGAAGGCCTTTCGGGTGTAAAGCACTGTTCGATCGGGACGAAAGCT  
CATCGGCTAATACCTGATGAGGTTGACGGTACCGGTAAAGGAAGCACCGGCCAACTCTGT  
GCCAGCAGCCGCGGTAATACAGAGGGTGCAAACGTTGCTCGGAATGATTGGGCGTAAAGC  
GCGTGTAGGCGGTCTAGTATGCCGGCTGTGAAAGCCCGTGGCTCAACCACGGAAGTGCA  
ACGGAAGTGTAGACTAGAGTGCCGAATAGGATGGCGGAATGCCAGTGTAGAGGTGAAA  
TTCGTAGATATTGGGTAGAACACCGGTGGCGAAGGCGGCCATCTGGGAGGTTACTGACGC  
TGAGACGCGAAAGCGTGGGGAGCAAACAGGATTAGAAACCCCTGTAGTCC

>Otu7362

CCAGCCTATGGGGGGGCTCCAGTCGAGAATATTTGGCAATGGGCGCAAGCCTGACCATGCG  
ACGCCGCGTGGTTGACGAAGTCCTTCGGGACGTAAAAACCTTTTTCGCGGTGAGGAAGTAA  
TTGACGTTAGCGCGCAATAAGGGGCTCCTAACTCTGTGCCAGCAGGAGCGGTAATACAG  
AGGCCCCAAGCATTATCCGGAATCACTGGGCGTAAAGGGTGTGCAGGCGGCACTGCTAGT  
CTTTCGTAAAAGCACCGGGGCTTAACCCAGTACTGCGGAGGAAACGGCAGAGCTCGAGG  
ACGCGAGAGGTAGAGGGAACCTCATGGTGTAGGGGTGAAATCCGTTGATATCATGGGGAAC  
ACCAAATGCGAAGGCACTCTACTGGCGCGCTCCTGACGCTGAGACACGAAAGCGTGGGAA  
TCGAACGGGATTAGATAACCCGAGTAGTCC

>Otu7364

CCAGCCTACGGGTCGCTGCAGTGGGGAATATTGCGCAATGGAGGAACTCTGACGCAGCG  
ACGCCGCGTGGGTGATGAAGGCCTTCGGGTGTAAAGCCCTGTTCGAGGGGAAGAAAAGC  
CGTCTGGCTAATATCCAGGCGGCATATGACGGTACCCTCAAAGGAAGCACCGGCTAACTC  
CGTGCCAGCAGCCGCGGTAAGACGGAGGGTGCAAGCGTTGTTTCAGATTGACTGGGCGTAA  
AGGGCGTGTAGGCGGTTGGCCAAGTCCGATGTGAAAGCCCGGGGCTCAGCCTCGGAAGTG  
CATCGGAAACTAGCCGGCTGGAGCGCGGTAGAGGATGGTAGAATTCCTGGTGTAGCGGTG  
AAGTGCGTAGATATCAGGAGGAATACCGGCGGCGAAGGCGGCCCTCTGGATCGTTGCTGA  
CGCTGAGACGCGAAAGCGTGGGGAGCAAACAGGATTAGAGACCCCGGTAGTCC

>Otu7370

CCAGCCTATGGGTGGCTGCAGTAGGGAATATTGCACAATGGGGGAACCCCTGATGCAGCA

ACGCCGCGTGAGTGACGAAGGCCTTCGGGTCGTAAAGCTCTGTTGTATGGGAAGAAAAAA  
ATGACGGTACCTTGCGAGAAAAGGACCGGCCAACTTCGTGCCAGCAGCCGCGGTAATACGA  
GGGGTCCTAGCGTTGTTTCGGAATCACTGGGCGTAAAGCGCATGTAGGCGGCTTCGTAAGT  
CAGGTGTGAAAGCCCTGGGCTCAACCCAGGAAGTGCACCTTGATACTGCAGAGCTTGAATA  
TGTAAGAGGGTAGCGGAATTCAGGTGTAGTGGTGAAATACGTAGATATCTGGAGGAACCT  
CCGGTGGCGAAGGCGGCTACCTGGTACAATATTGACGCTAAGATGCGAAAACGTGGGGAT  
CAAACAGGATTAGAAACCCGAGTAGTCC

>Otu7372

CCAGCCTATGGGGGGCTGCAGTCGAGAATCTTCCACAATGGACGAAAGTCTGATGGAGCG  
ACGCCGCGTGTTGATGAAGTCCTTCGGGACGTAAAAACCTTTTATGAGGGAGGAAGTTA  
TTGACGTTACCTCATGAATAAGGGGCTCCTAACTCTGTGCCAGCAGGAGCGGTAATACAG  
AGGCCCAAGCATTATCCGGAATCACTGGGCGTAAAGAGTGTGTAGGCGGTTGTGTTAGT  
CTTTCGTGAAAGATCTCGGGCTTAACCCGGGAGACGCGGAGGAAACGGCACGGCTACGAG  
GATGTGAGAGGTAAAGGGAACTCATGGTGTAGGGGTGAAATCCGTTGATATCATGGGGAA  
CACCAAATGCGAAGGCACCTTTACTGGCACACTCCTGACGCTGAAACACGAAAGCGTGGGA  
ATCGAATGGGATTAGAGACCCGCGTAGTCC

>Otu7381

CCAGCCTATGGGGGGCAGCAGTCGAGAATCATTCGCAATGGGCGAAAGCCTGACGATGCG  
ACGCCGTGTGAGCGATGAAGGCCTTCGGGTCGTAAAGCTCTTTCGCTTGCGAAGAAAGAAA  
GGTCGGCTAATATCCGGCCAATTTGATGGTACCAGGTAAAGAAGCACCGGCTAACTCCGT  
GCCAGCAGCTGCGGTAATACGGGGGGTGCTAGCATTAAATCGGATTTATTGGGCGTAAAGG  
ACGCGTAGGCGGTAAAGTAAGTCGGGTGTGAAATCCCGGGGCTCAACCCCGGAACTGCAC  
TTGAAACTGCCTTTCTTGAGGGTAGGCGGAGAAAACGGAATTCACAAGTAGCGGTGAAA  
TGCGTAGATATGTGGAAGAACACCTGTGGCGAAAGCGGTTTTCTAGCTTATTCCTGACGC  
TGAGGCGTGAAAGCAAGGGGAGCAAACAGGATTAGATACCCCGTAGTCC

>Otu7391

CCAGCCTATGGGGTGACAGCAGTAGGGAATTTTCCACAATGGGCGCAAGCCTGATGGAGCA  
ACGCCGCGTGAGGGATGAAGGTCTTCGGATTGTAAACCTCTTTGGAGTGGGAAGAATGTC  
TTCGGTGCTAACAGTACCGAGGAGTGACGGTACCACTAGAACAAAGACACGGCTAACTCTG  
TGCCAGCAGCCGCGGTAATACAGAGGTGTCAAACGTTGTCCGGAATTACTGGGCGTAAAG  
GGCGCGTAGGCGGTTGGATAAGTCAGATGTGAAATCACTGGGCTCAACCCAGTAATTGCA  
TTTGAAACTGTCCGACTCGAGTTGGGTAGAGGAGGGCGGAATTCCTGGTGTAGCGGTGAA  
ATGCGTAGATATCAGGAGGAACACCTGTGGCGAAGGCGGCTCTCTGGTCCATACTGACG  
CTGAGGCGCGAAAGCTAGGGTAGCAAACAGGATTAGAAACCCCGTAGTCC

>Otu7399

CCAGCCTACGGGTTGCACCAGTAACGAATCTTCCGCAATGCACGAAAGTGTGACGGAGCG  
ACGCCGCGTGTTGGGACGAAGCCCTTCGGGGTGTAACCCTGTGAGAGGATAGAAAGTTC  
TGATCATCCTCAGAGGAAGGCACGGCTAACTCTGTGCCAGCAGCCGCGGTAAGACAGAGG  
TGCCAAGCGTTAGGCGGAATCACTGGGTTTAAAGCGTGTGTAGGTGGACCTGTAAGTACC  
TTGTGAAATCCCACGGCTTAACCGTGGAACGCTCGGTATACTGCGGGTCTGGAGGTACC  
TAGGGGCGAGCGGAACAAATGGTGGAGCGGTGAAATGCGTAGATATCGGAAGGAACACCA  
GTGGCGAAAGCGACTTCCTGGTCAATACTGACGTTTCATGTGCGAAAGCGTGGGGAGCAA  
ACAGGATTAGAAACCCCGTAGTCC

>Otu7404

CCAGCCTATGGGGCGCTGCAGTGGGGAATCTTGACAATGGACGAAAGTCTGATGCAGCA  
ACGCCGCGTGAGTGAAGAAGGCCCTTGGGTTGTAAAGCTCTTTCGGTCGGAAGAAGGGG  
AGTCGTGCTAATACCACGAGTTTCTGACGGTACCGGCATAAGAAGCACCGGCTAATCTCG  
TGCCAGCAGCCGCGGTAATACGAGAGGTGCAAGCGTTGTTCCGAATGACTGGGCGTAAAG  
CGCACGTAGGCGGGCAAGTAAGTCAGATGTGAAATCCCTGGGCTTAACCTGGGAACCTGCA  
TCTGAAACTGCATGTCTTGAATGTCTCAGAGGTTGGTGGAATTCCTGGTGTAGGAGTGAA  
ATCCGTAGATATCAGGAGGAACATCGGAGGCGAAGGCGGCCAACTGGGAGCACATTGACG  
CTGAGGTGCGAAAGCGTGGGGAGCAAACAGGATTAGAGACCCCGTAGTCC

>Otu7409

CCAGCCTACGGGATGCTCCAGTCGAGGATCTTTCGCAATGGGCGCAAGCCTGACGAAGCG  
ACGCTGTGTGAGTGATGAAGGCCTTCGGGTTGTAAAGCTCTTTCGCGCGGGAACAAGAGA  
GGTTAGTGAATAACTAGCCGATGTGAGTGTACTGCGTAAAGAAGCACTGGCTAACTCCGT  
GCCAGCAGCTGCGGTAATACGGAGGGTGCAAGCATTAATCGGAATTATTGGGCGTAAAGG  
GCGCGTAGGCTGATGAACAAGTCAGATGTGAAATTTTGGAGCTCAGCTCCAAAGCTGCAT



TTGAAACTGTTTGTCTATAGAGGGATGGCGGAGAAAATGGAATTCACATGTAGCGGTGA  
AATGCGTAGATATGTGGAAGAACACCGGTGGCGAAGGCGGTTTTCTAGCTATTACCTGAC  
GCTGAGGCGCGAGAGCATGGGGAGCAAACAGGATTAGATACCCCCGTAGTCC

>Otu7414

CCAGCCTACGGGTGGCAGCAGCGGGGAATATTGGACAATGGGGGCAACCCTGATCCAGCC  
ATGCCGCGTGAGTGATGAAGGCCTTAGGGTTGTAAAGCTCTTTCGCAGGGGAAGATAATG  
ACGGTACCCTGAGAAGAAGCCTCGGCTAACTCCGTGCCAGCAGCCACGGTAAGACGGAGG  
AGGCTAGCGTTGTTTCGAATTACTGGGCGTAAAGCGTACGCAGGTGGCGGGACAAGTCGG  
ATGTGAAAGCCCCGGGGCTCAACCCCGGATGTGCATCCGTTACTGTTTTGCTAGAGTTCGG  
GAGAGGAGAGCGGAATTCACAGTGTAGAGGTGAAATTCGTAGATATTGGGAAGAACACCG  
GTGGCGAAGGCGGCTCTCTGGACCGATACTGACACTCAAGTACGAAAGCGTGGGGAGCAA  
ACAGGATTAGATACCCTGGTAGTCC

>Otu7415

CCAGCCTATGGGGCGCTGCAGTGGGGAATATTGGACAATGGGGCGAAAGCCTGATCCAGCA  
ATACCGCGTGTGTGAAGAAGGCCTTCGGGTGTAAAGCACTTTAAGCAGGGAAGAAAAAA  
CTCAAATAATATTTTGTAGTCTTGACGGTACCTGAAGAATAAGCACCGGCTAACTCTGTG  
CCAGCAGCCGCGGTAATACAGAGGGTGCAAGCGTTAATCGGATTTACTGGGCGTAAAGCG  
TGTGTAGGTGGTTGGGAAAGTCAATTGTGAAATCCCCGGGCTTAACCTCGAAACTGCTTT  
TGATACTGTCTGACTAGAAATTCGGTAGAGGGAGGCGGAACCTCCAGGTGTAGCGGTGAAAT  
GCGTAGATATCTGGAAGAACACCAATGGCGAAGGCAACCTCCTGGGCCTGAATTGACACT  
GAGACACGAAAGCGTGGGGATCAAACAGGATTAGAGACCCTCGTAGTCC

>Otu7417

CCAGCCTATGGGGGGCTGCAGTGGGGAATATTGGACAATGGGGGCAACCCTGATCCAGCA  
ATACCGCGTGTGTGAAGAAGGCCTTCGGGTGTAAAGCACTTTAGGTGGGAAGAAGGGG  
CGAAGTTTAAGAGATGTCGCCCTTGACTGTACCGACAGAATAAGCACCGGCTAACTCTGT  
GCCAGCAGCCGCGGTAATACAGAGGGTGCAAGCGTTAATCGGAGTTACTGGGCGTAAAGG  
GCGCGTAGGCGGTTAGTTAAGTGAGATGTGAAAGCCCTGGGCTTAACCTAGGAATGGCAT  
CTTAAACTGGTTAACTGGAGTACTGTAGAGGGTAGTGGAATTTCCGGTGTAGCGGTGAAA  
TGCGTAGAGATCGGAAGGAACACCAAGTGGCGAAGGCGGCTACCTGGACAGATACTGACGC  
TGAGGCGCGAGAGCGTGGGGAGCAAACAGGATTAGAACCCTCGTAGTCC

>Otu7418

CCAGCCTATGGGTGGCAGCAGTCGAGAATCTTTCGCAATGAGCGCAGGCCTGACGAAGCG  
ACGCCGTGTGAGCGAAGAAGGCCTTCGGGTGTAAAGCTCTTTCGCTAGGGAACAAGAGA  
GACGTGATAATACCACGTTGATTTGAGGGTACTTGGTAAAGAAGCACCGGCTAACTCCGT  
GCCAGCAGCTGCGGTAATACGGAGGGTGCAAGCATTGATCGGAATTACTGGGCGTAAAGG  
GTGCGTAGGCGGCCTGTTAAGTCAGATGTGAAAACCCACAGCTCAACTGTGGAACGGCAT  
TTGAAACTGGCGGGCTCGAGGATAGTTAGGGAAAACGGAATTCACATGTAGCGGTGAAA  
TGCGTAGATATGTGGAAGAACACCGGTGGTGAAGACGGTTTTCTGGGCTATAACTGACGC  
TGAGGCACGAAAGCTAGGGAAGCAAACAGGATTAGATACCCGTGTAGTCC

>Otu7419

CCAGCCTATGGGGCGCTGCAGTGGGGAATCTTGCGCAATGGGGCGAAAGCCTGACGCAGCG  
ACGCCGCGTGAGTGATGAAGGCCTTCGGGTGTAAAGCTCTGTGGAGAGGGACGAATAAG  
TGTTGGCTAACATCCAGCATGATGACGGTACCTCCTTAGCAAGCACCGGCTAACTCTGTG  
CCAGCAGCCGCGGTAAGACAGAGGGTGCAAACGTTGTTTCGGAATTACTGGGCGTAAAGCG  
TGTGTAGGCGGCCATGTAAGTCGGATGTGAAAGCCCCGGGCTTAACCCGGAAGTGCATT  
CGATACTGCGTGGCTTGAGTATCGGAGAGGTTGGTGAATTCCTCGGTGTAGAGGTGGAAT  
TCGTAGATATCGGGAGGAACACCGGTGGCGAAGGCGGCCAACTGGACGAATACTGACGCT  
GAGACACGAAAGCGTGGGGAGCAAACAGGATTAGAAACCCTTGTAGTCC

>Otu7420

CCAGCCTACGGGGGGCTGCAGTGGGGAATTTTGTGCAATGGGGCGAAAGCCTGACACAGCG  
ACACCGCGTGAGCGAAGAAGCCCCTTGGGGTGTAAGCTCTGTGCGCTGGAACGAAAAAA  
ATGACGGTACCAGCAAAGGAAGCATCGGCTAACTACGTGCCAGCAGCCGCGGTAAGACGT  
AGGATGCAAGCGTTGTCCGGATTTATTGGGCGTAAAGAGTTCGTAGGTGGTTCGTTAAGT  
CCGATGTTAAATCCCAGGGGCCAACCCCGGAGCTGCATTGGATACTGGCGGACTTGAGTA  
CAGTAGAGGCAAGCGGAATTCACAGTGTAGCGGTGAAATGCGTAGATATTGGGAAGAACA  
CCAGTGGCGTAAGCGGCTTGCTGGGCTGTAACCTGACACTGAGGAACGAAAGCCAGGGGAG  
CGAATGGGATTAGAAACCCGAGTAGTCC

>Otu7427

CCAGCCTATGGGAGGCTGCAGTAGGGAATCTTGCGCAATGGGCGAAAGCCTGACGCAGCA  
ACACCGTGTGAAGGAAGAAGCCTCTTGGGGTGTAAGCTTCTGTGCGCAGGGAAGATTATG  
ACGGTACCTGCAAGGGAAGCATCGGCTAACTACGTGCCAGCAGCCGCGGTAAGACGTAGG  
ATGCAAGCGTTGTCCGGAATTATTGGGCGTAAAGCGTTCGTAGGCGGTTGCCTAAGTCTG  
GTGTTAAAGGCCCTGAGCTTAACTCGGGTATGGCATTGGATACTGGGTGGCTAGAGTGCGG  
TAGAGGTAACGGAATTCCTGGTGTAGCGGTGAAATGCGTAGATATCGGGAGGAACACCA  
GTGGCGAAAGCGCGTTACTGGACCGCAACTGACGCTGAGGAACGAAAGCCAGGGGAGCGA  
AAGGGATTAGAAACCCTCGTAGTCC

>Otu7438

CCTACGGGGGGCAGCAGTGGGGAATTTTTTCGCAATGGGGGAAACCCTGACGAAGCAACGC  
CGCGTGGAGGATGAAGGCCTTCGGGTGTAAGCTCCTGTGCGACTGGGACGAAAGCAGTCT  
GGGCTAATATCCCGGGCTGTTGACTGTACCGGTGGAGGAAGCCACGGCTAACTCTGTGCC  
AGCAGCCGCGGTAATACAGAGGTGGCAAGCGTTGTTTCGGAATTACTGGGCGTAAAGGGCG  
CGTAGGCGGCTCGACAAGTCCCGCGTGAAAGCCCCCGGCTCAACTGGGGAAGTGCAGCGG  
AAACTGTGCGACTTGAGTTCGGGAGAGGGAAGCGGAATTCCGGGTGTAGCGGTGAAATGC  
GTAGATATCCGGAGGAACACCGGTGGCGAAGGCGGCTTCCTGGACCGACACTGACGCTGA  
GGCGCGAAAGCTAGGGGAGCAAACGGGATTAGATACCCTAGTAGTCC

>Otu7439

CCAGCCTATGGGATGCTGCAGTCGAGAATCTTCCACAATGGACGAAAGTCTGATGGAGCG  
ACATTTTCGTGATGGATGAAGCCCTTCGGGGTGTAACATCTTTTATCTGGGAGCAACTTA  
ATGAGAGTACCAGATGAATAAGGGGATACTAATTCTGTGCCAGCAGTAGCGGTAATACAG  
AATCCCTGAGCGTTACCCGGATTTATTGGGCGTAAAGGGTTCGTAGGTGGTAAAGTAAGT  
TACAAATTAACTTCATCGGCTTAACCTTTGAACTGTTTGTAAATACTGCTATACTAAGAG  
GGCGTTAGAGGCAAACGGAACCGACGGAGTAGGGGTGAAATCCGTTGATATCGTCGGGAA  
CACCAAAAGCGAAGGCAGTTTGCTGGGACGACCCTGACACTGAGGAACGAAAGCGTGGGG  
AGCAAAAAGGATTAGATACCCTAGTAGTCC

>Otu7443

CCAGCCTATGGGAGGCACCAGTAGGGAATTTTCCACAATGGACGAAAGTCTGATGGAGCA  
ACGCCGCGTGCAGGATGAATGCCTTAGGGTTGTAAAGCTCTTTTCTCTGTGACGAATATG  
ACGGTAGCAGAGGAATAAGGACCTGCTAACTACGTGCCAGCAGCCGCGGTCATACGTAGG  
GTCCAAGCATTATCCGGAATTACTGGGCGTAAAGAGTTGCGTAGGTGGCATAGTAAGCGG  
GTAGTGAAGTCGTGTGGCTCAACCACATATACATTACCTGAACTGCTACGCTAGAGGACG  
AGAGAGGTTATTGGAATTCACAGTGTAGGAGTGAATCCGTAGATATTGGGAGGAACACC  
GATGGCGTAGGCAGATAACTGGCTCGTTCCTGACACTAAGGCACGAAAGCGTGGGTAGCA  
AACGGGATTAGAAACCCTTG TAGTCC

>Otu7448

CAGCCTATGGGTGGCAGCAGTCGAGAATCATTCGCAATGGGCGCAAGCCTGACGATGCGA  
CGCCGTGTGAGCGATGAAGGCCTTAGGGTGTAAAGCTCTTTCGCTTGGGAACAAGAGAG  
ATTGCCTAATAAGCAGTTAATTTGAGGGTACCAGGTAAAGAAGCACCGGCTAACTCCGTG  
CCAGCAGCTGCGGTAATACGGAGGGTGCAAGCATTAATCGGATTTATTGGGCGTAAAGGG  
CGCGTAGGCTGGACGATAAGTCAGATGTGAAATCCCGGGGCTCAACCCCGGAACAGCATTT  
TGAAACTGTGCTTCTTGAGGATAGAGGGAGAAAACGGAATTCCACAAGTAGCGGTGAAAT  
GCGTAGATATGTGGAAGAACACCGGTGGCGAAGGCGGTTTTCTACTTTAGACCTGACGCT  
GAGGCGCGAAAGCAAGGGGATCAAACAGGATTAGAGACCCTCGTAGTCC

>Otu7449

CCAGCCTACGGGTCGCTGCAGTGGGGAATATTGCGCAATGGGCGAAAGCCTGACGCAGCG  
ACGCCGCGTGGAGGATGAAGGTCTTAGGATCGTAAAGCTTCTGTTAAGTGGGAAGAAATAC  
CCGTTTCTAATACAAGCGGGGGATGACGGTACCATTAGAGAAAGCACCGGCTAACTTCGT  
GCCAGCAGCCGCGGTAATACGAAGGGTGCGAGCGTTATTCGGAATCATTGGGCGTAAAGG  
GTGCGTAGACGGTATATTAAGTCTGTTGTTAAATGCTTCGGCCTAACCGGAGACTTGCGG  
TGGAACCTAATATGCTAGAGGGTGAAGAGAGAAGTGGAATTCTCGGAGTAGCGGTAAAA  
TGCGTAGATCTCGAGAGGAACACCAATGGCGAAGGCAGCTTCTTGGTCCATACCTGACGT  
TGAGGCACGAAAGCGTGGGGAGCAAACAGGATTAGAGACCCTGGTAGTCC

>Otu7450

CCAGCCTATGGGTGGCAGCAGTGGGGAATCTTGCAATGGGGGCAACCCTGATGCAGCG  
ACGCCGCGTGGAGGATGAAGGCCTTCGGGGTGTAAGCTCTTTCGGCAGGGACGATAATG  
ACGGTACCTGCAGAAGCAGCTGCGGCTAACTACGTGCCAGCAGCCGCGGTAATACGTAGG  
GGGCTAGCGTTGCTCGGAATCACTGGGCGTAAAGCGCACGTAGGCGGCTTTTTAAGTCAG

GGGTGAAATCCTGGAGCTCAACTCCAGAACTGCCTTTGATACTGAGAAGCTTGAGTCCGG  
GAGAGGTGAGTGGAAGTGCAGGTGTAGAGGTGAAATTCGTAGATATTCGCAAGAACACCA  
GTGGCGAAGGCGGCTCACTGGCCCGGTACTGACGCTGAGATGCGAAAGCGTGGGGAGCAA  
ACAGGATTAGATACCCTTGTAAGTCC

>Otu7462

CCAGCCTACGGGGTGCTCCAGTAGGGAATCTTGCGCAATGGGCGAAAGCCTGACGCAGCA  
ACGCCGCGTGGGGGATGAAGGCCTTCAGGTTGTAAACTCCTTTTAGTGGGAACGAAACTG  
ACGGTACCCACAGAAAAAGCTCCGGCCAACCACGTGCCAGCAGCCGCGGTGATACGTAGG  
GAGCAAGCGTTGTCCGATTTATTGGGCGTAAAGAGCTCGTAGGCGGCTTGGAAGTCGG  
GTGTGAAACCTCCAGGCTCAACCTGGAGCCGCCACTCGATACTGCCATGGCTAGAGTCCG  
GTAGGGGACCACGGAATTCCTGGTGTAGCGGTGAAATGCGCAGATATCAGGAGGAACACC  
AGTGGCGAAGGCGGTGGTCTGGGCCGGAAGTACGCTGAGGAGCGAAAGCGTGGGGAGCG  
AACAGGATTAGAAACCCTTGTAAGTCC

>Otu7464

CCAGCCTACGGGGGGGCTGCAGTAGGGAATATTGGACAATGGGCGAAAGCCTGATCCAGCC  
ATGCCGCGTGAGTGATGAAGGCCTTAGGGTTGTAAAGCTCCTTTTGGCGGGGAAGATAATG  
ACGGTACCCGCGAGAATAAGCACCGGCTGACTTCGTGCCAGCAGCCGCGGTAATACGAAGG  
GTGCTAGCGTTGTTCGGAATTACTGGGCGTAAAGCGCGCGTAGGCGGCCATACTCGTCGG  
GGGTGAAATCCCAGGGCTTAACCCTGGAAGTGCCTTCGAAACTGTATGGCTGGAGTGTGT  
GAGGGGATAGCGGAATTCCTAATGTAGAGGTGAAATTCGTAGATATTAGGAGGAACACCG  
GTGGCGAAGGCGGCTATCTGGCACACAAGTACGCTGAGGCGCGAAAGCGTGGGGATCAA  
ACAGGATTAGATACCCGCGTAGTCC

>Otu7470

CCAGCCTACGGGTCGCAGCAGTGGGGAATATTGGACAATGGAGGAAACTCTGATCCAGCC  
ATGCCGCGTGAGTGATGAAGGCCTTCGGGTGTAAAGCTCCTTTTAGATGTGACGATGGTG  
ACGGTAACATCAGAAAAAGCTCCGGCTAACTTCGTGCCAGCAGCCGCGGTAATACGAAGG  
GAGCGAGCGTTGTTTCGGAATCACTGGGCTTAAAGCGTGCGTAGGCGGGTTAGTAAGTCAG  
AAGTGAAAGCCCAGGGCTCAACCCTGGAAGTGCCTTTTGAGACTGCTAATCTGGAATTCGG  
TAGAGGTTTCGTGGAAGTCTAGTGTAGAGGTGAAATTCGCAGATATTAGGAAGAACACCA  
GTGGCGAAGGCGACGAACTGGGCCGATATTGACGCTGAGGCACGAAAGCGTGGGTAGCAA  
ACAGGATTAGATACCCGGGTAGTCC

>Otu7471

CCAGCCTATGGGATGCTGCAGTGAGGAATTTTCCGCAATGGGCGAAAGCCTGACGGAGCG  
ACGCCGCGTGTTGGGAAGAAGGCCTTCGGGTGTAAACCACTGTGGAAGGGGACGATATTG  
ACGGTACCCTTGAGGAAGCCCCGGCTAACTACGTGCCAGCAGCCGCGGTAAGACGTAGG  
GGGCAAGCGTTGTCCGGAATTATTGGGCGTAAAGCGCCCGTAGGTGGATCAACAAGTCTG  
CAAGCAAAGACCCGGGCTCAACTCGGGAATCCGTGTGGAAACTGTTGATCTTGAGGGAGT  
CAGAGGATGATGGAATTCCTGGTGTAGCGGTGAAATGCGTAGATATCGGGAGGAACACCA  
GTGGCGAAGGCGATCATCTGGGGCTAACCTGACACTGAGGAGCGAAAGCTAGGGGAGCAA  
ACGGGATTAGAAACCCGAGTAGCC

>Otu7473

CCAGCCTATGGGTGGCACCAAGTGGGGAATTTTTCGCAATGGACGAAAGTCTGACGCAGCA  
ACGCCGCGTGAGGGATGAAGGCCTTCGGGTGTAAACCTCCTTTTCTCAGGGAAGATAGTG  
ACGGTACCTGAGGAATAAGTCACGGCTAACTACGTGCCAGCAGCCGCGGTAATACGTAGG  
TGGCTAGCGTTGTCCGATTTACTGGGCGTAAAGAGCGCGCAGGCGGTCGTTCAAGTCGA  
GTGTGAAAGCCCCCGGCTCAACTGGGGAGGGTCACTCGATACTGATCGACTCGAAGGCAG  
GAGAGGGAAGCGGAATTCCTGGTGTAGTGGTGAATGCGTAGATATCGGGAGGAACACCA  
GTGGCGAAGGCGGCTTTCTGGCCTGTTCTTGACGCTGAGGCGCGAAAGCTAGGGTAGCAA  
ACGGGATTAGATACCCGCGTAGTCC

>Otu7477

CCAGCCTACGGGTTGCTGCAGTAGGGAATTTTCCACAATGGACGGAAGTCTGATGGAGCA  
ACGCCGCGTGACAGGATGAATGCCTTCGGGTGTAAACTGCTTTTATGTGCGAAGATTATG  
ACAGTAACACATGAATAAGGACCTGCTAACTACGTGCCAGCAGCCGCGGTCATACGTAGG  
GTCCAAGCGTGATCCGGAATTACTGGGCGTAAAGGAGTTGCGTAGGTGGCATGGTAAGTTG  
GTAGTGAAAGCGTTTCGGCTCAACCGAATATACATTATCAAACTGCCAAGCTCGAGGACG  
AGAGAGGCATCTGGAATTCCTAGTGTAGGAGTGAATCCGTAGATATTAGGAGGAACACC  
GATGGCGTAGGCAGGGTGTCTGGCTCGTTTCTGACACTAAGGCACGAAAGCGTGGGGAGCG  
AACGGGATTAGATACCCAGTAGTCC

>Otu7480

CCAGCCTATGGGAGGCTGCAGTAGGGAATCTTGCGCAATGGGGCAACCCTGATCCAGCAA  
TGCCGCGTGTGTGAAGAAGGCCTGCGGGTTGTAAAGCACTTTCGGTGGGGAGGAAAGCCT  
TCGTGTTAATAGCGCGAGGGATTGACGTTACCCACATAAGAAGCACCGGCTAACTCTGTG  
CCAGCAGCCGCGGTAATACAGAGGGTGCAAGCGTTAATCGGAATCACTGGGCGTAAAGAG  
CGCGTAGGTGGTTATTTAAGTTGGATGTGAAAGCCCCGGGCTCAACCTGGGAAGGCCATC  
CAAGACTGGGTAACTAGAGTACAGTAGAGGGAAGTGAATTTCCGGTGTAGCGGTGAAAT  
GCGTAGATATCGGAAGGAACACCAGTGGCGAAGGCGGCTTCCTGGACTGATACTGACACT  
GAGGCGCGAAAGCGTGGGTAGCGAACAGGATTAGAAACCCTTGTAGTCC

>Otu7481

CCAGCCTACGGGGGGCTGCAGTAAGGGATATTGCGCAATGGGCGAAAGCCTGACGCAGCA  
ACGCCGCGTGAGGATGAAGGCCTTCGGGTCGTAAACTCCTTTTTTCAGGGACGAGCAAG  
GACGGTACCTGGAGAATAAGTCACGGCTAACTACGTGCCAGCAGCCGCGGTAAAACGTAG  
GTGGCGAGCGTTATCCGGATTTACTGGGTGTAAAGCGTGTGCAGGCGGATTACCAAGTGG  
TGTATGAAAGGTTGGGGCTTAACTCCAACAGTGTATGCCAGACTGGTAGTCTGGAGTGC  
AGAGAGGGGCGTGGAATTCCGGGTGTAGTGGTGAATGCGTAGAGATCCGGAGGAACCCC  
AGAGGCGAAGGCGGCGCCCTGGCTCGCAACTGACGCTCAGACACGACAGCATGGGGAGCG  
AACGGGATTAGATACCCCAGTAGTCC

>Otu7482

CCAGCCTACGGGGGGCAGCAGTAAGGAATATTGGTCAATGGACGCAAGTCTGAACCAGCC  
ATGCCGCGTGAAAGGAAGAAGGCCCTAGTGGTCGTAAACTCCTTTTATATGGGAAAAATC  
TTGGGTCGTGAATCCGAGTTGATGGTACTATATGAATAAGCAACGGCTAACTCCGTGCCA  
GCAGCCGCGGTAATACGGAGGTTGCAAGCGTTATCCGGATTTATTGGGTTTAAAGGGTGC  
GTAGGCGGACCTATAAGTCAGCGGTGAAATCCAACAGCTTAACTGTAGAATTGCCATTGA  
TACTGTAGGTCTTGAGTATAGCTGAAGAGGGCGGAATGTGTTGTGTAGCGGTGAAATGCT  
TAGATATAACACAGAACACCGATTGCGAAGGCAGCTCTCTAAACTATAACTGACGCTGAG  
GCACGAAAGCGTGGGGATCAAACAGGATTAGATACCCTCGTAGTCC

>Otu7488

CCAGCCTATGGGATGCAGCAGCCGAGAATATTCGACAATGGGCGAAAGCCTGATCGAGCG  
ACGCCGCGTGATTGATGAAGTTCCACTGGAATGTAAAAATCCTTTTATAGAGGAGAAAGCC  
GCATTTATGCGGTGTGATAGTACTCTAGGAATAAGGGGTGCTAAACTCGTGCCAGCAGC  
AGCGGTAATACGAGTGCCCCGAGCGTTATCCGGAATTATTGGGCGTAAAGGGTGTGTAGG  
CGTCTTGTTAGTCTTTTGTTAAAGCTCCTGGCTTAACCGGGAATGCAAAAGAAACGG  
CAAGACTAGAGGGTGCAAGAGGCTTATGGAACCTCATGGTGTAGGGGTGAAATCCGTTAAT  
ATCATGGGGAACACCGAAGGCGAAGGCAGTAAGCTGGTGCACATCTGACGCTGAAACACG  
AAAGCGTGGGTAGCGAATGGGATTAGAGACCCAGTAGTCC

>Otu7490

CCAGCCTATGGGGGGCAGCAGTAGGGAATTTTCCACAATGGGCGAAAGCCTGATGGAGCA  
ACGCCGCGTGAGGGATGACGCATCTCGGTGTGTAAACCTCTTTGGAGCGGGAAGAACGCC  
GTTTGGGTGAATAATCCAGACGGGTGACGGTACCGCTAGAACAAGACACGGCTAACTTCG  
TGCCAGCAGCCGCGGTAATACGAAGGTGTGCAACGTTGTCCGGAATTATTGGGCGTAAAG  
GGCGCGTAGGCGGCCAGGTAAGTGGGATGTGAAAGCTCTGGGCTCAACCCAGGAATTGCA  
TTCCATACTGCTTGGCTTGAGTTCGGTAGAGGAGGGCGGAATTCTAGGTGTAGCGGTGAA  
ATGCGTAGATATCTAGAGGAACACCCGTGGCGAAGGCGGCTCTCTGGTCCGATACTGACG  
CTGAGGCGCGAAAGGTAGGGGAGCAAACAGGATTAGATACCCTTGTAGTCC

>Otu7491

CCAGCCTACGGGAGGCTGCAGTGGGGAATATTGGACAATGAGGGCAACCTCGATCCAGCA  
ATACTGAGTGGATGATGACGGTCGATTGATTGTAAAGTCCTTTTTATAAAGAGAACTATG  
ATATTATTTATAGAATAAGTTCCGGCTAACTTCGTGCCGGCAGCCGCGGTAAAACGGGGG  
GAACAAGCGTTATACATCATGATTGGGCGTAAAGGGCTTGAAGGTGGTTTTCTTAGCAAC  
TGGTTGAGACGAGAAGACTAGAGTTCATGAGAGGATCGGGGTACTTTCAAATAGAGGTG  
AAATTTTTATATTGATAGGGACCACTGCCGGGCGAAAGCGCCGGTCTAACATGGCACTGA  
CACTGATAAGCGGAAGCATGGGTATCAAACGGGATTAGAGACCCCGTAGTCC

>Otu7494

CCAGCCTACGGGTCGCTGCAGTGGGGAATATTGGACAATGGGCGAAAGCCTGATCCAGCC  
ATGCCGCGTGAGTGAAGGCTTTAGGGTTGTAAAGCTCTTTCGCCGATGAAGATAATG  
ACGGTAGTCGGAGAAGAAGCCCCGGCTAACTTCGTGCCAGCAGCCGCGGTAAATACGAAGG  
GGGCTAGCGTTGTTCCGAATTACTGGGCGTAAAGCGCGCGTAGGCTGTGTGCAAGTCAG

GGGTGAAATCCTGGGGCTTAACCCAGAACTGCCTTTGAAACTGCGATGCTGGAATCTCA  
GAGGGGATAGCGGAATTCCAAATGTAGGGGTGAAATCCGTAGATATTTGGAGGAACACCG  
GTGGCGAAGGCGGCTATCTGGATGAGTATTGACGCTGAGGCGCGAAAGCGTGGGGATCAA  
ACAGGATTAGAAACCCGCGTAGTCC

>Otu7495

CCAGCCTATGGGAGGCAGCAGTAGGGAATTTTCCACAATGGGCGAAAGCCTGATGGAGCA  
ACGCCGCGTGACAGGATGAAGGCTTTCGGGTGCTAAACTGCTTTTCTTTGTGAGGATTATG  
ACAGTAGCAGAGGAATAAGGATCGGCTAACTCCGTGCCAGCAGCCGCGGTCATACGGAGG  
ATCCAAGCGTTATCCGGAATTACTGGGCGTAAAGAGTTGCGTAGGCGGCAGAGTAAGCAA  
GATGTGAAAGCGTATGGCTCAACCATATATACATGTCCTGAACTGCTCAGCTAGAAGATG  
AGAGAGGTGGCTGGAATTCCCAGTGTAGGAGTGAAATCCGTAGATATTGGGAGGAACACC  
GATGGCGTAGGCAGGCCACTGGCTCATTCTTGACGCTAAGGCACGAAAGCGTGGGGAGCG  
ACCGGGATTAGAGACCCTCGTAGTCC

>Otu7496

CCAGCCTATGGGGGGCACCAGTCGAGGATCTTCTGCAATGGGCGCAAGCCTGACAGAGCG  
ACGCCGCGTGGGGGAGGAAGGCCTTTCGGGTGTAACCCCTGTTGCCGGTTAAGAATGCT  
GGGCGCGAATAGCGCTTCCAGTTGACTAAGGCCGGTGAGGAAGCCACGGCTAACTACGT  
GCCAGCAGCCGCGTAAGACGTAGGTGGCGAGCGTTGTTTCGGAATCACTGGGCATAAAGC  
GCGCGTAGGCGGCCAAGTCAGTCGGGTGTGAAAGCCCTCGGCTCAACCGAGGAAGTGC  
CCGATACTGCTTGGCTTGAGGTCCGGAGGGGAGAGTGGAATTTCCCGGTGGAGCGGTGAAA  
TGCGTAGAGATCGGGAAGAACGCCGGCGCGGCGAAAGCGACTCTCTGGTCGGAATCTGACGC  
TGAGGCGCGAAAGCTAGGGGAGCAAACGGGATTAGAGACCCGCGTAGTCC

>Otu7500

CCAGCCTATGGGAGGCAGCAGTGGGGAGTCTTGCGCAATGGGCGAAAGCCTGACGCAGCA  
ACGCCGCGTGTTGATGAAGGTCTTCGGATCGTAAAGCACTGTCGCGAGGGAAGATACGC  
CTCTGGCTAATATTCAGAGGCTAAGACGGTACCTCGAGAGGAAGCACCGGCTAACTCTGT  
GCCAGCAGCCGCGTAATACAGAGGGTGCAGAGTGTGTTTCGGAATTATTGGGCGTAAAGC  
GCTTGTAGGCGGCTTATCAAGTCTCGTGTGAAATCCCCAGGCTTAACCTGGGAAGTGC  
GGGAACTGAAGAGCTTGAATGCCGGAGAGGGTCGCGGAATTTCCCGGTGTAGAGGTGAAA  
TTCGTAGATATCGGGAGGAACACCAAGTGGCGAAGGCGGCGACCTGGACGGACATTGACGC  
TGAGACGCGAAAGCGTGGGGAGCAAACAGGATTAGATACCCAGTAGTCC

>Otu7502

CCAGCCTATGGGGGGCACCAGTGGGGAATTTTGGACAATGGGCGCAAGCCTGATCCAGCC  
ATGCCGCGTGAGTGAAGAAGGCCTTTCGGGTGTAAGCTCTTTCGGCGGGGACGAAATAG  
CGCGGGCGAATATCCCGCGTTGATGACGGTACCCGTAGAAGAAGCACCGGCTAACTACGT  
GCCAGCAGCCGCGTAATACGTAGGGTGCAGAGCGTTAATCGGAATTACTGGGCGTAAAGC  
GTGCGCAGGCGGTCTCGCAAGTCCGATGTGAAATCCCCGGGCTCAACCTGGGAAGTGC  
TGGAAGCTACGAGGCTGGAGTACGGCAGAGGGGGGTGGAATTCACGTGTAGCAGTGAAA  
TGCGTAGATATGTGGAGGAACACCGATGGCGAAGGCAGCCCCCTGGGCTAGTACTGACGC  
TCATGCACGAAAGCGTGGGGAGCAAACAGGATTAGATACCCCGGTAGTCC

>Otu7506

CCAGCCTACGGGATGCACCAGTGGGGAATTTTGGACAATGGGGGCAACCCTGATCCAGCC  
ATGCCGCGTGAGTGAAGAAGGCCTTTCGGGTGTAAGCTCTTTCGGTGGGAACGAAACGG  
TCGCGGTTAATAGCCGGGATCACTGACGGTACTCACAGAAGAAGCACCGGCTAACTACGT  
GCCAGCAGCTGCGGTAATACGTAGGGTGCAGGCGTTAGTCGGAATTACTGGGCGTAAAGG  
GTGCGCAGGCGGTTTTGTAAAGTCAGGCGTGAAAGCCCCGGGCTTAACCTGGGAAATGCGT  
TTGAGACTGCAAGGCTAGAGTGTGTCAGAGGGGGGTGGAATTCACGTGTAGCAGTGAAA  
TGCGTAGAGATGTGGAGGAACACCGATGGCGAAGGCAGCCCCCTGGGATAACACTGACGC  
TCGGGCACGAAAGCGTGGGGAGCAAACAGGATTAGAACCCGAGTAGTCC

>Otu7508

CCAGCCTACGGGATGCAGCAGTAGGGAATCTTGCGCAATGGGCGAAAGCCTGACGCAGCA  
ACGCCGCGTGGGGGATGAAGGCATTCGGGTGTAAGCTCCTTTCAGTGGGAACGAAATTG  
ACGGTACCCACAAAAGAAGCCCCGGCCAACTACGTGCCAGCAGCCGCGGTGATGCGTAGG  
GGGCGAGCGTTGTCCGATTCAATTGGGCGTAAAGAGCTCGTAGGCGGTTTGGTAAGTCGG  
GTGTGAAACCTCCAGGCTCAACCTGGAGATGCCACTTGATACTGCCATGGCTAGAGTCCG  
GTAGGGGACCATGGAATTCCTGGTGTAGCGGTGAAATGCGCAGATATCAGGAGGAACACC  
AGTAGCGAAGGCGGTGGTCTGGGCCGGTACTGACGCTGAGGAGCGAAAGCGTGGGGAGCG  
AACAGTATTAGAGACCCTAGTAGTCC

>Otu7509

CCAGCCTACGGGGGGCACCAGTAAGGAATATTGGACAATGGAGGCAACTCTGATCCAGCC  
ATGCCGCGTGAAGGATGAAGGCGCTATGCGTCGTAAACTTCTTTTGTATGGGAAAAATAT  
CCGTTTTTCTAAACGGATTGATGGTACCATAAGAATAAGGGTCGGCTAACTTCGTGCCAG  
CAGCCGCGGTAATACGAAGGACCCGAGCGTTATCCGGATTCATTGGGTTTAAAGGGTGCG  
TAGGTGGGCCTATAAGTCAGTGGTGAAAGCCCTTCGCTTAACGAAGGAATTGCCGTTGAT  
ACTGTAGGTCTTGAGTACAGTTGAGGTGGGCGGAATGTGTCATGTAGCGGTGAAATGCTT  
AGATATGACACAGAACACCGATTGCGAAGGCAGCTCGCTAAACTGTAACTGACACTGAGG  
CACGAAAGCGTGGGTAGCAAACAGGATTAGAGACCCCCGTAGTCC

>Otu7510

CCAGCCTATGGGAGGCAGCAGTGGGGAATATTGGACAATGAGCGCAAGCTTGACCAAGCG  
ACGCCGCGTGTGCGATGAAGGCCTTCGGGTGTAAAGCACTGTTCGAGGGGGACGAAGCCG  
CAAGGTTGACCGATCCCTGGAGGAAGCTCGGGCTAAGTTCGTGCCAGCAGCCGCGGTAAG  
ACGAACCGAGCGAACGTTGTTTCGGAATCACTGGGCTTAAAGGGCGCGTAGGCGGCTCGCC  
AAGTCGGGGGTGAAATACTTCAGCTTAACTGGAGAAGTGCCTTCGATACTGGTGGGCTAG  
AGGGAGGTAGGGGCATGTGGAACCTTCTGGTGGAGCGGTGAAATGCGTTGATATCAGAAGG  
AACGCCGCTGGCGAAAGCGACGTGCTGGACCTTTTCTGACGCTGAGGCGCGAAAGCTAGG  
GGAGCAAACGGGATTAGAGACCCCCGTAGTCC

>Otu7513

CCAGCCTATGGGAGGCTGCAGTGGGGAATCTTGACACAATGGGGGCAACCCTGATGCAGCG  
ACGCCGCGTGAGCGATGAAGCCCTTCGGGTGTAAAGCTCTTTCGGCAGGGACGATAATG  
ACGGTACCTGAAGAAGAAGCTGCGGCTAACTACGTGCCAGCAGCCGCGGTGATACATAGG  
GTGCGAGTGTGGTCCGGATTCATTGGGCGTAAAGAGCTCGTAGGCGGTTTGGTAAGTCGG  
GTGTGAAACCTCCAGGCTCAACCTGGAGATGCCACTTGATACTGCCATGACTAGAGTCCG  
GTAGGGGATCATGGAATTCCTGGTGTAGCGGTGAAATGCGCAGATATCAGGAGGAACACC  
AGTAGCGAAGGCGGTGATCTGGGCCGGAACCTGACGCTGAGGAGCGAAAGCGTGGGGAGCG  
AACAGGATTAGAAACCCGAGTAGTCC

>Otu7516

CCAGCCTACGGGACGCAGCAGTGGGGAATTTTTCGCAATGGGCGAAAGCCTGACGCAGCG  
ACGCCGCGTGTGCGATGAAGGCCTTTGGGTCTGTAAAGCACTGTTCGAGAGGGAAGAAAAC  
TCCGGCGCTAATACCGCCGGGAATTGACGGTACCTTTAAAGGAAGCACCGGCTAACTCTG  
TGCCAGCAGCCGCGGTAATACAGAGGGTGCAAACGTTGCTCGGAATTATTGGGCGTAAAG  
CGCGTGTAGGCGGTTTCATCAAGTCGGTTGTGAAAGCCCTTGGCTCAACCAAGGAAGTGCG  
TCCGAAACTGGTGGGCTAGAGTTCTGAAGAGGATGGCGGAATGCGCAGTGTAGAGGTGAA  
ATTCGTAGATATTGCGTAGAACACCGGTAGCGAAGGCGGCCATCTGGGAAGCGACTGACG  
CTAAGACGCGAAAGCGTGGGGATCAAACAGGATTAGAAACCCGCGTAGTCC

>Otu7518

CCAGCCTATGGGATGCAGCAGTAGGGAATCTTGCGCAATGGGGGAAACCCTGACGCAGCG  
ACGCCGCGTGCAGGATGAAGGGCTTCGGGTCTGTAAAGCCGCTTTCAGCAGGGACGAAATTG  
ACGGTACCTGCAGAAGAAGGCCCGGCCAACTACGTGCCAGCAGCCGCGGTGATACGTAGG  
GGTCTAGCGTTGTCCGGAATCATTGGGCGTAAAGAGCTCGTAGGCGGTTTCGATTAGTCGG  
GTGTGAAATCTCCACGCTCAACGTGGAGGGGCCACTCGATACTGTTCGTGACTCGAGTCCG  
GTAGGGGAGTTTCGGAATTCCTGGTGTAGCGGTGAAATGCGCAGATATCGGGAGGAACACC  
AGTGGCGAAGGCGGAACCTCTGGGCCGGAACCTGACGCTGAGGAGCGAAAGCGTGGGGAGCA  
AACGGGATTAGATAACCGTGTAGTCC

>Otu7519

CCAGCCTATGGGTTGCTGCAGTCGAGAATCTTTCACAATGGGGGAAACCCTGATGGAGCG  
ACGCCGCGTGGGGGATGAATGGCTTCGGCCCGTAAACCCCTATCATTTGCGAACAAACCT  
TTTCATCTAACACATGAAAAGCTGATTGTAGCGGAAGAGGAAGGGACGGTTAACTCTGTG  
CCAGCAGCCGCGGTAATACAGAGGTCCCAAGCGTTGTTTCGATTCACTGGGCGTAAAGGG  
TGCGTAGGTGGCTGGGTAAGTCTGATGTGAAATCTCGGAGCTTAACTCCGAAACTGCATT  
GGATACTACCCAACCTTGAGGGTCGGAAGGGGGACTGGAATTCTCGGTGTAGCAGTGAAAT  
GCGTAGATATCGAGAGGAACACCAAGTGGCGAAGGCGAGTCCCTGGACGACTCCTGACACT  
GAGGCACGAAAGCTAGGGGAGCAAACAGGATTAGAAACCCCTAGTAGTCC

>Otu7522

CCAGCCTATGGGTGGCAGCAGTAGGGAATATTGGTCAATGGGGGCAACCCTGAACCAGCC  
ATGCCGCGTGCAGGAAGAAGGCGTTCTGCGTTGTAAACTGCTTTTGTATCGGGAACAAATG  
ACTCTTGCGAGAGTAGCTGAGTGTACCGATAGAATAAGCCACGGCTAACTACGTGCCAGC

AGCCGCGGTAATACGTAGGTGGCAAGCGTTGTCCGGATTTATTGGGTTTAAAGGGTGCCT  
AGGCGGCTGTTTTAAGTCAGTGGTGAAGCCGATCGCTTAACGATCGAACTGCCATTGATA  
CTGAATAGCTTGAGTACAGATGAGGTAGGCGGAATTGACAGTGTAGCGGTGAAATGCATA  
GATATTGTCAAGAACCCGATTGCGAAGGCAGCTTACTAAAGTGTCACTGACGCTGAGGC  
ACGAAAGTGCGGGGATCAGACAGGATTAGAAACCCTAGTAGTCC

>Otu7523

CCAGCCTATGGGGTGCACCAGTGGGGAATATTGCGCAATGGGCGAAAGCCTGACGCAGCG  
ATGCCGCGTGTGGGATGAAGGTCTTCGGATTGTAAACCACTGTCGGGAGGGACGAAGCTC  
TGACGGTACCTCCAAAGGAAGCACCGGCTAACTCCGTGCCAGCAGCCGCGGTAATACGGA  
GGGTGCAAGCGTTGTCCGGAATCACTGGGCGTAAAGGGCGCGTAGGCGGCTTGGAAGTA  
GGAGGTGAAATCTCGCGGCTCAACTGCGAGGCTGCCTTCTAGACTGCCAAGCTCGAGCAC  
AGTAGAGGCAGGTGGAATTCCCGGTGTAGCGGTGGAATGCGTAGAGATCGGGAAGAACAT  
CGGTGGCGAAGGCGGCCTGCTGGGCTGTTGCTGACGCTGATGCGCGACAGCGTGGGGAGC  
AAACAGGATTAGAAACCCCAGTAGTCC

>Otu7524

CCAGCCTACGGGTTGCTGCAGTGAGGAATATTGCGCAATGGGCGAAAGCCTGACGCAGCG  
ACGCCGCGTGGAGGATGAAGGTCTTTGGATCGTAAACTTCTGTTAAGTGGGAAGAAAAAG  
TTGTTTCTAATACAGACAAAATATGACGGTACCTCTAAAGAAAGCACCGGCTAACTTCGT  
GCCAGCAGCCGCGGTAATACGAAGGGTGCAAGCGTTATTCGGATTTATTGGGTGTAAAGG  
GTGCGTAGACGGTACGTTAAGTCCGCTGTAAATTTCCAGCTCAACTGGGAGCCAGCGG  
TGGATACTGGCGTGCTAGAGGATGGAAGAGAGAAGTGAATTTCCCGGAGTAGCGGTAAAA  
TGCGTAGATCTCGGGAGGAACACCAAAGGCGAAGGCAGCTTCTTGGTCCATATCTGACGT  
TGAGGCACGAAAGCGTGGGGAGCAAACGGGATTAGATAACCCGAGTAGTCC

>Otu7527

CCAGCCTACGGGGGGCTCCAGTTAGGAATATTGGACAATGGGCGCAAGCCTGATCCAGCC  
ATGCCGCGTGAGTGATGAAGGCCTTCGGGTGTAAAGCTCTTTAGTCCACGAATATAATG  
ACTGTAGTGGAAGAATAAGCCCCGGCTAACTTCGTGCCAGCAGCCGCGGTAATACGAGGG  
GGGCGAGCGTTGTTTCGGAATCACTGGGCGTAAAGAGTGCCTAGGCGGTCGTGAAAGTTAG  
AAGTGAAAGCCCCAAGGCTCAACCTTGGAATTGCTTTTAATACTACATGACTAGAAATTCGG  
GAGAGGATAGCGGAATTGTCAGTGTAGCAGTGAAATGCGTAGATATTGACAGGAACACCG  
GTGGCGTAAGCGGCTATCTGGACCGACATTGACGCTGAGGTACGAAAGCGTGGGGATCAA  
ACAGGATTAGATAACCTTGTAGTCC

>Otu7530

CCAGCCTACGGGTGGCACCAAGTGGGGAATATTGGGCAATGGGCGAAAGCCTGACCCAGCC  
ACGCCGCGTGAGTGATGAAGGCCTTCGGGTGTAAAGCTCTGTGGGGAGGGACGAATAAG  
CCGGGTGCTAATATCACCAGGCCCTGACGGTACCTCCTTAGCAGGCACCGGCTAACCATG  
TGCCAGCAGCCGCGGTAATACATGGGGTGCAAACGTTGCTCGGAATTATTGGGCGTAAAG  
CGCACGTAGGCGGTTCACTAAGTCGGATGTGAAAGCCCTCGGCTCAACCGAGGAAGTGCA  
TCCGAAACTGGCGAGCTTGAGTACGAAAGAGGGTGC CGGAATTCCCGGTGTAGAGGTGAA  
ATTCGTAGATATCGGGAGGAACACCAGTGGCGAAGGCGGCGACCTGGGTCGATACTGACG  
CTGAGGTGCGAAAGCGTGGGGAGCAAACAGGATTAGAAACCCTAGTAGTCC

>Otu7533

CCAGCCTATGGGGGGCTGCAGTGGGGAATATTGGACAATGGGCGAAAGCCTGATCCAGCA  
ATGCCGCGTGTGTGAAGAAGGCCTGAGGGTTGTAAAGCACTTTCAGTGGGGAGAAAGAGG  
CCATTGTTAATACCAATGGTGGATGATGTTACCCACAGAAGAAGCACCGGCTAACTCTGT  
GCCAGCAACCGCGGTAATACAGAGGGTGCAAGCGTTAATCGGAATTACTGGGCGTAAAGG  
GTGCGTAGGTGGTTTTGTAAAGTCAGATGTGAAATTCCTGGGCTCAACCTGGGGACTGCGT  
CTGATACTGTGAAGCTAGAGTACTGTAGAGGAAAGTGAATTTCCGGTGTAGCAGTGAAA  
TGCGTAGATATCGGAAGGAACATCAGTGGCGAAGGCGACTTCTTGACAGATACTGACAC  
TGAGGCACGAAAGCGTGGGGAGCAAACAGGATTAGAACCCCAGTAGTCC

>Otu7536

CCAGCCTACGGGAGGCAGCAGTGGGGAATCTTGCGCAATGGGCGAAAGCCTGACGCAGCG  
ACGCCGCGTGGAGGATGAAGGCCTTCGGGTGTAAACTTCTGTTAAGTGGGAAGAAATAA  
CTGTCCCTAATACGGACGGGAGATGACTGTACCATTAGAGAAAGCACCGGCTAAACTCGT  
GCCAGCAGCCGCGGTAATACGAGTGGTGCAAGCGTTATTCGGAATCATTGGGCGTAAAGG  
GTGTGTAGACGGCATATTAAGTCAATTGTTTAATTCTCCGGCCTAACCGGAGTCCAGCGG  
TAGATACTGGTATGCTAGAGGGTGAAGAGAGAAGTGAATTTCTCGGAGTAGCGGTAAAA  
TGCGTAGATCTCGAGAGGAACACCAATGGCGAAGGCAGCTTCTTGGTCCACACCTGACGT

TGAGACACGAAAAGCGTGGGGATCAAACAGGATTAGATACCCCCGTAGTCC

>Otu7538

CCAGCCTACGGGTTCACCAGTAGGGAATATTGGACAATGGAGGAACTCTGATCCAGCC  
ATGCCGCGTGAATGATGAAGGCCTTCGGGTGTAAAGTTCTTTAGTCCGGGAAGATAATG  
ACGGTACCGGAAGAATAAGCTCCGGCTAACTCTGTGCCAGCAGCCGCGGTAATACAGAGG  
GAGCTAGCGTTGTTTCGAATTACTGGGCGTAAAGCGCGCGCAGGCGGCCATTTAAGTCAG  
ATGTGAAAGCCCCGGGGCTTAACCTCGGAACGTCATTTGAAACTGAGTGGCTAGAGTATGG  
TAGGGGAGAGGGGAATTCCTAGTGTAGCGGTGAAATGCGTAGAGATTAGGAGGAACACCA  
GTGGCGAAGGCGCCTCTCTGGGCCATTACTGACGCTGAGGCGCGAAAGCGTGGGGAGCAA  
ACAGGATTAGATACCCTAGTAGTCC

>Otu7542

CCAGCCTATGGGAGGCTCCAGTCGAGAATTTTTCTCAATGGGCGAAAGCCTGAAGGAGCG  
ACGCCGCGTGGGGGATGAATGGCTTCGGCCCGTAAACCCCTGTCATTTGCGAACAAACCT  
TTTCATTTAACAGACGAAAAGCTGATAGTAGCGGAAGAGGAAGGGACGGCTAACTCTGTG  
CCAGCAGCCGCGGTAATACAGAGGTCCCAAGCGTTGTTTCGGATTCACTGGGCGTAAAGGG  
TGCGTAGGTGGTCAGATAAGTCTGATGTGAAATCTCGGAGCTTAACCTCGAAACTGCATT  
GGATACTATTTGGCTTGAGGGTCGGAGGGGGGACTGGAATTCTCGGTGTAGCAGTGAAT  
GCGTAGATATCAAGTGGAACACCAGTGGCGAAGGCGAGTCCCTAGACAACCTCTGACACT  
GAGGCACGAAAGCTAGGGGAGCAAACAGGATTAGATACCCGTGTAGTCC

>Otu7543

CCAGCCTACGGGGGGCTGCAGTGGGGAATCTTGCGCAATGGGCGAAAGCCTGACGCAGCA  
ACGCCGCGTGGAGGATGAAGGCCTTCGGGTGCTAAACTTCTTTTAGCAGGGACGAGGAAG  
GACGGTACCTGCGGAATCAGTCACGGCTAACTACGTCCCAGCAGCCGCGGTAACACGTAG  
GTGGCAAGCGTTATCCGGATTTACTGGGCGTAAAGGGTGTGCAGGCGGGAGTGCAAGTGG  
TGTATGAAATATCCCAGCTTAACCTGGGAGGGGTATGCCAGACTGCACTTCTAGAGGACG  
AGAGAGGGGGGTGGAATTCCGGGTGTAGTGGTGAATGCGTAGAGATCCGGAGGAACCCC  
AGAGGCGAAGGCGGCCCCCTGGCTCGTATCTGACGCTCAGCCACGAAAGCATGGGGAGCG  
AACGGGATTAGATACCCCCGTAGTCC

>Otu7550

CCAGCCTATGGGTTCAGCAGTGGGGAATATTGGGCAACGGAGTAATTTCTGACCCAGCG  
AGAATGCCTGCATGACGAAGGCGTGAAGTTTCTGTAAAGTGCTGTCGGTGATAACGATA  
ATACCAGTAATCATAAATAAGAAGTGCCGGCTAACTCCGTGCCAGCAGCTGCGGTAAGAC  
GGAGGGCGCGGGCGTTATCCGTTGTGATTGGGTGTAAAGGGTACGTAGGCTGCTGTTGAT  
AATTTAAACTTAAAATGCGGGGCAATCCTACGCATAAAGTTTTTTAAAGGATTACGCTT  
GTGTTGAATGCAGTTAGTTTAATTTTTTGGGTAATAGGGGTAGAATCCCACGAGCCAAG  
AAAGAATACCAACGAGCGGAGGCATCTTTCTAGTTTCAACAGACGCTAAGGTACGGAAGC  
TGCGAAATCAAACAGGATTAGATACCCGCGTAGTCC

>Otu7556

CCAGCCTACGGGTGGCAGCAGTGGGGAATTTTGGACAATGGGCGAAAGCCTGATCCAGCG  
ACGCCGCGTGGAGGATGAAGGCCTTCGGGTGTAAACTCCTTTTAGAGGGAACGAATAAA  
TTGACGGTACCCCTCAGAAAAAGCCACGGCTAACTACGTGCCAGCAGCCGCGGTAATACGT  
AGGTGGCGAGCGTTACTCGGATTTACTAGGCGTAAAGCGCTTGTAGGTGGTTGGATAAGT  
CTGTAGTGAAATTTACGGCTTAACCTGTGAACTGTCTATAGAACTATCCGGCTTGAGTG  
TGGAAGGGGGCAACGGAATTCCTGGTGTAGCGGTGAAATGCGTAGATATCGGGAGGAACA  
CCAATGGCGAAAGCAGTTGCCTGGTCCAATACTGACACTGAGGAGCGAAAGCTAGGGGAG  
CAAACAGGATTAGATACCCTCGTAGTCC

>Otu7559

CCAGCCTACGGGGGGCAGCAGTAGGGAATTTCCACAATGGGCGAAAGCCTGATGGAGCA  
ACGCCGCGTGCAGGATGAAGGCTCTAGGGTCGTAAACTGCTTTTATCTGTGACGATTATG  
ACGGTAGCAGATGAATAAGGATCGGCTAACTCCGTGCCAGCAGCCGCGGTCACACGGAGG  
ATCCAAGCGTTATCCGGAATTACTGGGCGTAAAGAGTTGCGTAGGTGGCAGAGTAAGTTG  
GTAGTGAAAGCGTGTGGCTCAACCACATAAACATTACTAAAACCTGTTTCAGCTAGAGGACG  
AGAGAGGTTATTGGAATTTCTAGTGTAGGAGTGAAATCCGTAGATATTAGAAGGAACACC  
GATGGCGTAGGCAGATAACTGGCTCGCTCCTGACACTAAGGCACGAAAGCGTGGGTAGCA  
AACGGGATTAGATACCCAGTAGTCC

>Otu7564

CCAGCCTATGGGTGGCAGCAGTGAAGGATATTGCGCAATGGGCGAAAGCCTGACGCAGCG  
ACACCGCGTGAAGGGTGAAGGCTTTTCGGGTGCTAAACTTCTGTAAAGTGGAAGAAAGGC



CTGGTTCTAATACAGCCAGGAAATGACGGTACCACTAGAGAAAGCACCGGCTAACTTCGT  
GCCAGCAGCCGCGGTAAGACGAGGGGTGCGAACGTTATTCGGAATGATTGGGTGTAAAGG  
GTGCGTAGGCGGCATGTTAAGTCAATCGTTAAATTTTTTCAGCTTAACTGAAAGTAGGCGG  
TAGAAACTGGCGTGCTTGAGGGTGGGAAGAGAGAAGTAGAATTCTCGGAGTAGCGGTAAAA  
TGCGTAGATCTCGAGAGGAATACCAATGGCGAAGGCAGCTTCTTGGTCCATTTCTGACGC  
TGAGGCACGAAAGCGTGGGGAGCAAACAGGATTAGAGACCCGTGTAGTCC

>Otu7566

CCAGCCTATGGGATGCAGCAGTTTCGAATCATTACAAATGGGCGAAAGCCTGATGGTGCG  
ACGCCGCGTGAGGGATGAAGGTCTTCGGATTGTAAACCTCTGTCACCGGGGAAGAAACGC  
TTCATTTTAATAGAATGAAGCCTGACTTAACCCGGAGAGGAAGCAGTGGCTAACTCTGTG  
CCAGCAGCCGCGGTAATACAGAGACTGCAAGCGTTATTCGGATTCACTGGGCGTAAAGGG  
TGCGCAGGTGGCTGGGTGTGTCAGATGTGAAATCCCGAGGCTCAACCTCGGAACTGCGTC  
TGAAACTACTCGGCTAGAGTATTGGAGAGGGTAACGGAATTCACGGTGTAGCAGTGAAAC  
GCGTAGATATCGTGAGGAACACCAGAGGCGAAGGCGGTTACCTGGACAATTACTGACACT  
CAGGCACGAAAGCGTGGGGAGCAAAGGGATTAGATAACCCGCGTAGTCC

>Otu7568

CCAGCCTATGGGGGCTGCAGTGGGGAATATTGGACAATGGGGGAACCCCTGATCCAGCAA  
TGCCGCGTGTGTGAAGAAGGCCCTTCGGGTGTAAAGCACTTTCGGTGGGGAAGAAAGACC  
TAAGGTTAATATCCTTAGGAGGTGACGTTACCCACAGAAGAAGCACTGGCTAACTCTGTG  
CCAGCAGCCGCGGTAATACAGAGAGTGAAGCGTTAATCGGAATTACTGGGCGTAAAGCG  
CATGTAGGTGGATATTTAAGTCGGATGTGAAAGCCCTAGGCTCAACCTGGGAATTGCATC  
TGATACTGGGTATCTAGAGTATGGTAGAGGGAAGTGGAATTTCCGGTGTAGCGGTGAAAT  
GCGTAGATATCGGAAAGAACACCAGTGGCGAAGGCGGTTTCCCTGGACCAATACTGACACT  
CAGGTGCGAAAGCGTGGGGAGCAAACAGGATTAGAAACCCCGTAGTCC

>Otu7571

CCAGCCTATGGGTGGCTGCAGTGGGGAATTTTGGACAATGGGGGCAACTCTGATCCAGCG  
ACGCCGCGTGAAGGATGAAGGTCTTCGGATTGTAAACTTCTTTTGGAGGGGATGAATGCC  
TGAGTGAAAAATTCAGGGTGACAGTACTCTCTGAATAAGCCACGGCTAACTACGTGCCAG  
CAGCCGCGGTAATACGTAGGTGGCAAGCGTTACTCGGAGTCACTAGGCGTAAAGCGCAGG  
TAGGCGGTTTCGGTAAGTCTGTTGTGAAAGCTCCCGGCTCAACTGGGAGAGGCCAACGGAA  
ACTACCGGGCTAGAGTGTGGTAGAGGTAGCTGGAATTTCCCGGTGTAGCGGTGAAATGCGT  
AGATATCGGGAGGAATACCTATGGCGAAAGCAGGCTACTGGACCATCACTGACGCTGATC  
TGCGAAAGCTAGGGGAGCAAACAGGATTAGAAACCCCTAGTAGTCC

>Otu7572

CCAGCCTACGGGGGGCAGCAGTAAGGAATATTGGTCAATGGGCGAAAGCCTGAACCAGCC  
ATGCCGCGTGCAGGATGACGGCCCTATGGGTGTAAACTGCTTTTATCAGGGAAGAAACC  
CCTTTACGTGTAGAGGGTTGACGGTACCTGAAGAATAAGGATCGGCTAACTCCGTGCCAG  
CAGCCGCGGTAATACGGAGGATCCAAGCGTTATCCGGATTTATTGGGTTTAAAGGGTGCG  
TAGGCGGCCTATTAAGTCAGAGGTGAAAGCCTGGAGCCTAACTCCAGAACTGCCTTTGAT  
GCTGATGGGCTTGAATATAGTTGAGGTGGGCGGAATGTGTCATGTAGCTGTGAAATGCTT  
AGATATGACGCAGAACACCAATTGCGAAGGCAGCTCGCTAACTATTATTGACGCTGAGG  
CACTAAAGCGTGGGGATCAAACAGGATTAGAGACCCTCGTAGTCC

>Otu7574

CCAGCCTACGGGGGGCAGCAGTGGGGAATCTTAGACAATGGGCGAAAGCTTGATCTAGCA  
ATATTGCGTGAATGAACATTGACAGCGGAGATGCTGTAAAATTCTATCGATCTAGGGATT  
ATTATGGCTGTACCTAGCGACGAAGTCCTGGCTTACTTCGTGCCAGCAGCCGCGGTAATA  
CGAGGGGGACGAGCGTTATCCGGATGGATTGGGCGTAAACGTTTGTAGGTGGTTTTTTA  
AAATCTTTATGAAATTCTAGAGCCTAACTTTAGAGCACATATTGATGAAGTTAATCCTTG  
AGTTTATTTACGGAGTTTTTGAATTTTATAAGTAAGAGTGAAATCTAACGATCTATAAAG  
AAAATCGATAGCGAAGGCTATTCTCTTGAATATTCTGACATTGAGAAACGAAAGCGTAGG  
GAGCCAATAGGATTAGATAACCTGGTAGTCC

>Otu7576

CCAGCCTACGGGAGGCTCCAGTGGGGAATATTGGACAATGGGCGCAAGCCTGATCCAGCC  
ATGCCGCGTGGGTGATGAAGGCCCTAGGGTTGTAAAGCCCTTTCGGCGGGGACGATGATG  
ACGGTACCCGCAGAAGAAGCCCCGGCTAACTTCGTGCCAGCAGCCGCGGTAATACGAAGG  
GGGCTAGCGTTGCTCGGAATGACTGGGCGTAAAGGGCGCGTAGGCGGTCTGGACAGTCAG  
GCGTGAAATTTCCCGGGCTCAACCTGGGGGCTGCGCTTGATACATCTCGACTCGAGTGAGG  
AAGAGGGTCGTGGAATTTCCAGTGTAGAGGTGAAATTCGTAGATATTGGGAAGAACACCG

GTGGCGAAGGCGGCGACCTGGTCCTTGACTGACGCTGAGGCGCGAAAGCGTGGGGAGCAA  
ACAGGATTAGAAACCCCTTGTAAGTCC  
>Otu7577  
CAGCCTATGGGGCGCTGCAGTGAGGAATATTGCTCAATGGACGAAAGTCTGAAGCAGCAA  
CGCCGCGTGAGGGATGAAGGTGCTCTGCATTGTAAACCTCTGTAGTCGGGGAAAAACGGC  
GGGTTATTACCCGTTTGATGGTACCCGAAAAGTAAGGATCGGCTAACTACGTGCCAGCAG  
CCGCGGTAATACGTAGGATCCAAGCGTTGTCCGGATTTACTGGGTGTAAAGGGTGCGCAG  
GCGGACTTGTAAGTTAGAGGTGAAATCTCACGGCTCAACCGTGAAACTGCCTTTAATACT  
GCAAGTCTTGAATTGGGGAGAGAGTCGCGGAATTCCGAGTGTAGCAGTGAAATGTGTAGA  
TATTCGGAAGAACACCAGTGGCGAAGGCAGCGACTTGGCCCTATATTGACGCTCAGGCAC  
GAAAGCATGGGGATCAAACAGGATTAGAGACCCTCGTAGTCC  
>Otu7579  
CCAGCCTATGGGAGGCTGCAGTCGAAAATATTGACAATGGGCGAAAGCCTGATCGAGCG  
ATACCGCGTGGTGGATGAAGCGATTTCGTCGCGTAAACATCTTTTATGAGGGAGGAAGTTA  
TTGACGTTACCTCATGAATAAGGGGCTCCTAACTCTGTGCCAGCAGGAGCGGTAATACAG  
AGGCCCCGAGCGTTACCCGGAATTACTGGGCGTAAAGAGTGCGTAGGTGGTCTGTGTAGT  
CGTCTGTTAAACCCCGGAGCTCAACTCCGGATCTGCAGACGAAACGGCAGCTTGAGGG  
CGTGAGAGGTACATGGAATCATGGTGTAGGGGTGAAATCCGTTGATATCATGGGGAAACA  
CCGAAAGCGAAGGCAATGTACTGGCGCGTTCTTGACACTCAAGCACGAAAGCGTGGGTAG  
CGAACGGGATTAGAGACCCCCGTAGTCC  
>Otu7595  
CCAGCCTATGGGATGCAGCAGTAGGGAATATTGGACAATGGGCGCAAGCCTGATCCAGCC  
ATCCCGCGTGAAGGATTAAGGCCCTATGGGTTGTAAACTTCTTTTCTCTGGGAATAAAAA  
GTGGAGTTCACTCCGCCCTGAAGGTACCAGAGGAATAAGCACCGGCTAACTCCGTGCCAG  
CAGCCGCGGTAATACGTAGGTGGCAAGCGTTGTCCGGATTTATTGGGTTTAAAGGGTGCG  
TAGGCGGCCCTGTAAGTCAGTGGTGAATACGGCAGCTCAACTGTGAGGTGCCATTGAT  
ACTGCAGGGCTTGAGTACAGACGAGGTAGGCGGAATTGACGGTGTAGCGGTGAAATGCTT  
AGATATCGTCAAGAACACCGATAGCGAAGGCAGCTTACTAGGCTGTAACCTGACGCTGAGG  
CACGAAAGTGTGGGGATCAAACAGGATTAGAGACCCTCGTAGTCC  
>Otu7597  
CCAGCCTACGGGAGGCTCCAGTGGGGAATCTTGCGCAATGGGCGAAAGCCTGACGCAGCG  
ACGCCGCGTGGGTGATGAAGGCCTTCGGGTGTAAAGCCCTGTGGGGAGGGACGAATAAG  
GCTGGGTGAACAATCCAGTTGATGACGGTACCTCCTTAGCAAGCACCGGCTAACTCTGTG  
CCAGCAGCCGCGGTAATACAGAGGGTGCAAACGTTGTTCCGATTTACTGGGCGTAAAGCG  
CGTGTAGGCGGCCGGCCAAGTCGGATGTGAAAGCCCGGGGCTCAACCTCGGAAGTGCATT  
CGATACTGGTCTGGTCTCGGAGAGGCGGGTGGAACTCTCGGTGTAGAGGTGAAAT  
TCGTAGATATCGAGAAGAACACCGGTGGCGAAGGCGGCCCGCTGGACGAAGACTGACGCT  
GAGACGCGAAAGCGTGGGGAGCAAACAGGATTAGAAACCCTCGTAGTCC  
>Otu7598  
CCAGCCTATGGGGCGCTGCAGTGGGGAATATTGGACAATGGGCGCAAGCCTGATCCAGCG  
ATGCCGCGTGTGTGAAGAAGGCCTTTGGGTGTAAAGCACTTTTTTTGGGGAAGAACGTT  
ATGGATTGCAATAGGGTCCATAAGTGACGGTACCTAACGAATAAGCACCGGCTAACTCTG  
TGCCAGCAGCCGCGGTAATACAGAGGGTGCGAGCGTTGTTCCGAATTATTGGGCGTAAAG  
GGTGCGTAGGCGGTGCCACAAGTCACTTGTGAAATCCCCAGGCTTAACCTGGGGCCTGCA  
GGCGAAACTGTGGTGTGCTGGAGTATGGGAGAGGTGCGTGGAATTCCCGGTGTAGCGGTGAA  
ATGCGTAGATATCGGGAGGAACACCTGTGGCGAAAGCGGCGCACTGGACCATAACTGACG  
CTGATGCACGAAAGCTAGGGGAGCAAACAGGATTAGAAACCCGAGTAGTCC  
>Otu7599  
CCAGCCTATGGGTGCGCAGCAGTGGGGAATTTCCACAATGGGCGAAAGCCTGATGGAGCA  
ACGCCGCGTGCAGGATGAATGCCTTCGGGTGCTAAACTGCTTTTTTTGTGAGGATTATG  
ACAGTAGCAGAAGAATAAGGATCGGCTAACTCCGTGCCAGCAGCCGCGGTCATACGGAGG  
ATCCAAGCGTTATCCGGAATTACTGGGCGTAAAGAGTTGCGTAGGCGGCATAGTAAGCAG  
AGTGTGAAATCGTGTGGCTCAACCATAACATCCATACTTTGAACTGCTAAGCTAGAGAATG  
AGAGAGGTGGCTGGAATTCCCAGTGTAGGAGTGAAGTCCGTAGATATTGGGAGGAACACC  
GATGGCGTAGGCAGGCCACTGGCTCATTTCTGACGCTCAGGCACGAAAGCGTGGGGAGCG  
ACTGGGATTAGAAACCCGAGTAGTCC  
>Otu7601  
CCAGCCTACGGGAGGCAGCAGTCGAGGATCTTTCGCAATGGGCGCAAGCCTGACGAAGCG

ACGCCGTGTGAGCGAAGAAGGCCTTCGGGTGTAAAGCTCTTTTCGCCTGGGAACAAGAGA  
CTCTAGCGAATAACTAGGGGATTTGAGGGTACTAGGTAAAGAAGCACCGGCTAACTCCGT  
GCCAGCAGCTGCGGTAATACGGAGGGTGCAAGCATTAAATCGGATTTATTGGGCGTAAAGA  
GGGCGTAGGCGGACATGTAAGTCAGATGTGAAAGCCCGGGGCTCAACCCCGGAACGGCAT  
TTGAAACTGCATATCTAGAGGATAGGCGGAGAAAACGGAATTCACATGTAGCGGTGAAA  
TGCGTAGATATGTGGAAGAACACCGGTGGCGAAGGCGGTTTTCTAGCTTAGCCCTGACGC  
TGAGGCCCGAAAGCAAGGGGAGCAAACAGGATTAGAAACCCGCGTAGTCC

>Otu7604

CCAGCCTATGGGGTGCAGCAGTGGGGAATCTTGCGCAATGGGAGAAATCCTGACGCAGCA  
ACGCCGCGTGGGTGATGAAGGTCTTCGGATCGTAAAGCCCTGTCGGAGGGGAAGATGCTT  
GTTTGTGCTAATAGTACAGACAGGTGACGGTACCCTCAAAGGAAGCACCGGCTAACTCTG  
TGCCAGCAGCCGCGGTAATACAGAGGGTGCAAGCGTTGTTCGGAATTATTGGGCGTAAAG  
GGAGTGTAGGCGGTTTTCTAAGTCTTCTGTGAAATCTACGGGCTTAGCTCGTAACGTGCA  
GAGGAACTGGAAGACTTGAGTGTGCGAGAGGGTAGCGGAATTCCCGGTGTAGAGGTGAA  
ATTCTGTAGAGATCGGGAGGAACACCAGTGGCGAAGGCGGCTACCTGGCTGACAACTGACG  
CTGAGACTCGAAAGCATGGGGAGCAAACAGGATTAGATACCCGGGTAGTCC

>Otu7606

CCAGCCTATGGGACGCAGCAGTGAAGGAATCTTGCGCAATGGGCGAAAGCCTGACGCAGCG  
ACGCCGCGTGGAGGATGAAGGTCTTCGGATTGTAAACTTCTGTTAAGTGGGGCGAAATAC  
CCATCTCTAATAAAGATGGGGGATGACAGTACCCTAGAGAAAGCACCGGCTAAACTCGT  
GCCAGCAGCCGCGGTAATACGAGTGGTGCAAGCGTTATTCGGATTTATTGGGCGTAAAGG  
GTGTGCAGACGGCTTATTAAGTCACTTGTAAATTCTCCGGCCTAACTGGAGGTATGCGG  
GTGAAAATGATGAGCTTGAGGATGGAAGAGAGAAGCGGAATTCTCGGAGTAGCGGTAAAA  
TGCGTAGATCTCGAGAGGAACACCAATGGCGAAGGCAGCTTCTTGGTCCATTCTGACGT  
TCATACACGAAAGCGTGGGGAGCAAACAGGATTAGAGACCCCTCGTAGTCC

>Otu7607

CCAGCCTATGGGAGGCACCAGTGAGGGATATTGCACAATGGGCGCAAGCCTGATGCAGCG  
ACGCCGCGTGGGTGAAGAAGGTCTTCGGATCGTAAAGCCCTTTTCTGCGTGACGAGGAAC  
AGACGGTAGCGCAGGAAGAAGTCTCGGCTAACTACGTGCCAGCAGCCGCGGTAAAACGTA  
GGAGGCGAGCGTTATCCGGAGTTACTGGGCGTAAAGCGCGTGTAGGTGGTCTGGTAAGCT  
GGATGTGAAAGATCCCGGCTCAACCGGGAAAAGCCATAGAGGACTGCCAGACTCGAGGGG  
GGTAGAGGGGCGTAGAATTCCGGGTGTAGCGGTGAAATGTGTAGAGATCCGGAGGAATAC  
CAGAGGTGAAGACGGCGCCCTGGGCCCCGACCTGACACTGAGACGCGAAAGCGTGGGGAGC  
GAACGGGATTAGAAACCCCCGTAGTCC

>Otu7614

CCAGCCTATGGGAGGCTCCAGTGGGGAATATTGCACAATGGGCGAAAGCCTGATGCAGCG  
ACGCCGCGTGGAGGATGAAGGTTTTTCGGATTGTAAACTCCTGTTAAGTGGGAAGAGAGAA  
CCTGTGTTAATACCACAGGGAGATGACGGTACCCTAGAGAAAGCACCGGCTAACTTCGT  
GCCAGCAGCCGCGGTAATACGAGGGGTGCAAGCGTTATTCGGAATAACTGGGCGTAAAGA  
GCGCGTAGGCGGCTTGTAAAGTCTGTTGTAAATTGCCCGGCTTAACCGGGAAACGGCAA  
TAGAACTGGCGAGCTAGAGGACAAGAGAGAGAAGTGGAAATCTCGGAGTAGCGGTAAAA  
TGCGTAGATCTCGAGAGGAACACCGATGGCGAAGGCAGCTTCTTGGCTTGTATCTGACGC  
TCAAGTGCGAAAGCGTGGGGAGCAAACAGGATTAGATACCCTCGTAGTCC

>Otu7617

CCAGCCTACGGGTTGCTGTCAGTAGGGAATATTGCACAATGGAGGAAACTCTGATGCAGCA  
ACGCCGCGTGAGTGACGAAGGCCTTCGGGTCTGTAAGCTCTGTTGTACGGAAGAAAAAA  
ATGACGGTACCGTATAAGAAAGGACCGGCCAACTTCGTGCCAGCAGCCGCGGTAATACGA  
AGGGTCCAAGCGTTGTTTCGGAATCACTGGGCGTAAAGCGCATGTAGGAGGCTTAATAAGT  
CGAATGTGAAATCCCCGGGCTCAACCCGGGACGTGCATTCGATACTGTTGAGCTTGAGTA  
TGAGAGAGGGTAGTAGAATTCCAGGTGTAGTGGTGAATACGTAGATATCTGGAGGAATA  
CCGGTGGCGAAGGCGGCTACCTGGCTCAATACTGACTCTTAGGTGCGAAAGCGTGGGGAT  
CAAACAGGATTAGAGACCCGGGTAGTCC

>Otu7619

CCAGCCTATGGGGGGCAGCAGTGGGGAATATTGGACAATGGGGGCAACCCTGATCCAGCA  
ATGCCGCGTGAGTGATGAAGGCCTTCGGGTGTAAAGCTCTTTTGTGACGGGACGATAATG  
ACGGTACCTGACGAATAAGCTCCGGCTAACTTCGTGCCAGCAGCCGCGGTAATACGAAGG  
GAGCTAGCGTTGTTTCGGAATTACTGGGCGTAAAGGGCGCGTAGGCGGCTTTATAAGTCAG  
GTGTGAAATCCCTGGGCTTAACCTAGGAATGGCATTGTAAACTGTAAGGCTAGAGATCGA

GAGAGGATAGTGGAATTGCGAGTGTAGAGGTGAAATTCGTAGATATTCGCAAGAACACCG  
GTGGCGAAGGCGGCTATCTGGCTCGATACTGACGCTGAGACGCGAAAGCGTGGGGAGCAA  
ACAGGATTAGAAACCCCTGTAGTCC

>Otu7622

CCAGCCTATGGGGTGCTGCAGTGGGGAATATTGCACAATGGGCGAAAGCCTGATGCAGCG  
ACGCCGCGTGAGGGATGACGGCCTTCGGGTGTAAACCTCTTTTCGACAGGGACGAAGGGA  
AACTGACGGTACCTGTAGAAGAAGCACCGGCTAACTACGTGCCAGCAGCCGCGGTAATAC  
GTAGGGTGCAGCGTTGTCCGGAATTACTGGGCGTAAAGAGCTTGTAGGCGGTCTGTCAC  
GTCGATTGTGAAGACTCACAGCTCAACTGTGGGCCTGCAGTCGATACGGGCAGACTAGAG  
TACTTCAGGGGAGACTGGAATTCCTGGTGTAGCGGTGAAATGCGCAGATATCAGGAGGAA  
CACCGGTGGCGAAGGCGGGTCTCTGGGAAGTAAGTACGCTGAGAAGCGAAAGCGTGGGT  
AGCGAACAGGATTAGAAACCCCTGTAGTCC

>Otu7624

CCAGCCTATGGGGGGCACCAGTGGGGAATATTGGACAATGGGGGAAACCCTGATCCAGCA  
ATGCCGCGTGTGTGAAGAAGGCCTTCGGGTGTAAAGCACTTTCAGTAGGGAAGAAAGAC  
TTAAGACTAATAATCTTAGGAGTTGACGTTACCTAAAGAAGAAGCACTGGCTAACTCTGT  
GCCAGCAGCCGCGTAATACAGAGAGTGCAAGCGTTAATCGGAATCATTGGGCGTAAAGC  
GCACGTAGGTGGATACTTAAGTCGAACGTGAAATCCCCGGGCTTAACCTGGGAAGTGCCT  
CCGATACTGAGCATCTAGAGTAGGGTAGAGGGAAGTGAATTTCCGGTGTAGCGGTGAAA  
TGCGTAGATATCGGAAAGAACACCAAGTGGCGAAGGCGGCTTCCTGGACCAATACTGACGC  
TGAGGAGCGAAAGCGTGGGGAGCGAACAGGATTAGATACCCCTCGTAGTCC

>Otu7625

CCAGCCTATGGGTGGCAGCAGTAAGGAATATTGGACAATGGGCGCAAGCCTGATCCAGCC  
ATGCCGCGTGAAGGATGAAGGCGCTATGCGTCGTAAACTTCTTTTGTATGGGAAAAATTC  
CCCGCTTTCTAGCGGGGTGTGATGGTACCATAAGAATAAGGGTCGGCTAACTTCGTGCCAG  
CAGCCGCGGTAATACGAAGGACCCGAGCGTTATCCGGATTCATTGGGTTTAAAGGGTGCG  
TAGGCGGACCTGTAAGTCAGTGGTGAATCCCTTCGCTTAACGAAGGAATTGCCATTGAT  
ACTGCAGGTCTTGAGTACAGTTGAGGTTGGCGGAATGTGTCATGTAGCGGTGAAATGCTC  
AGATATGACACAGAACACCGATTGCGAAGGCAGCTAGCTAAACTGTAAGTACGCTGAGG  
CACGAAAGCGTGGGTAGCAAACAGGATTAGAAACCCGAGTAGTCC

>Otu7627

CCAGCCTATGGGGGGCAGCAGTTTGGGAATATTGGTCAATGGGGGAAACCCTGAACCAGCG  
ACGCCGCGTGAGGATGAAGGATCTAGGTCTGTAAACTCCTTTTGTGCGGAAAGACTTAG  
GACGGTACCCGACGAATAAGCTCCGGCTAACTACGTGCCAGCAGCCGCGGTAAGACGTAG  
GGAGCGAGCGTTGTCCGGATTTACTGGGCGTAAAGGGCGCGTAGGCGGCTCGTTAAGTGT  
GAAGTGAATCTCCAGGGCTCAACCCGGAAGTGTCTTTACATACTGGCGAGCTAGAGGGA  
TGGAGAGGTAAGTGAATTCCTGGTGTAGCGGTGAAATGCATAGATATCAGGAGGAACAC  
CCATGGCGAAGGCAGCTTACTGGCCATCTCTGACGCTGAGGCGCGAAAGCGTGGGTAGC  
AAACAGGATTAGAGACCCCAGTAGTCC

>Otu7629

CCAGCCTATGGGGGGCTGCAGTGGGGAATTTTGGACAATGGGGGCAACCCTGATCCAGCG  
ACGCCGCGTGAAGGATGAAGGTCTTCGGATTGTAAACTTCTTTTAGAGGGGATGAATGTC  
TTGGTGAATAGCCAAGCGTGACAGTACTCTTTGAATAAGCCACGGCTAACTACGTGCCAG  
CAGCCGCGGTAATACGTAGGTGGCAAGCGTTACTCGGAATCACTAGGCGTAAAGCGCAGG  
TAGGCGGTTGGGTAAGTCTTTTGTGAAAGCTCCCGGCTCAACTGGGAGAGGTCAAAGGAA  
ACTACTCGGCTAGAGTTTGGTAGGGGATACTGGAATTCCTGGTGTAGCGGTGAAATGCGT  
AGATATCAGGAGGAATACCTATGGCGAAAGCAGGTATCTGGGCCACAACCTGACGCTGAGC  
TGCGAAAGCTAGGGGAGCAAACAGGATTAGATACCCCCGTAGTCA

>Otu7631

CCAGCCTACGGGGGGCACCAGTGGGGAATCTTGCGCAATGGGCGAAAGCCTGACGCAGCA  
ACGCCGCGTGTGTGATGAAGGTCTTCGGATCGTAAAGCACTGTGCGAGGGAAGACGAGA  
CGGGTTCTAACAGGACCTGTTTGTAGACGGTACCTCGAGAGGAAGCACCGGCTAACTCTGT  
GCCAGCAGCCGCGGTAATACAGAGGGTGCAGAGCGTTGTTTCGGAATTATTGGGCGTAAAGC  
GCATGTAGGCGGCCTGTTAAGTTCCTGTGAAATCCCTAGGCTTAACCTAGGAAGTGC GC  
GGAAAAGTGGTAGGCTTGAGTGCTGGAGAGGGTCGCGGAATTCCTGGTGTAGAGGTGAAA  
TTCGTAGATATCGGGAGGAACACCAAGTGGCGAAGGCGGCGACCTGGACAGACACTGACGC  
TGAGACGCGAAAGCGTGGGGCGCAAACAGGATTAGATACCCGCGTAGTCC

>Otu7632

CCAGCCTATGGGACGCACCAGTAGGGAATATTGCACAATGGAGGAACTCTGATGCAGCG  
ACGCCGCGTGAGTGACGAAGGCCTTCGGGTTCGCAATGCTCTGTTCTCAGGGAAAAAGAAA  
GTGATTGTACCTGAGAAGAAAGGACCGGCTAACTTCGTGCCAGCAGCCGCGGTAAGACGA  
GGGGTCCAAGCGTTGTCCGGAATTATTGGGCGTAAAGCGGGTGTAGGTGGCTCTATAAGT  
CAGAAGTGAAAGCCCCGAGCTTAACTTGGGAAGTGCTTTTGATACTGCAGAGCTTGAATG  
TGGGAGAGGATCGTGGAGTTCAGGTGTAGTGGTGAAATACGTAGATATCTGGAGGAACA  
CCGGTGGCGAAGGCGGCATCTGGCCCAACATCGACACTGAGACCCGAAAGCGTGGGGAT  
CAAACAGGATTAGAAACCCGAGTAGTCC

>Otu7637

CCAGCCTATGGGTGGCAGCAGTCGAGGATCTTTCGCAATGGGCGAAAGCCTGACGAAGCG  
ACGCCGTGTGAATGATGAAGGCCTTCGGGTGTAAAGTTCTTTCGCCTGGGAACAAGAGA  
GGCTAGTGAATAACTTAGCCGATTTGAGGGTACCAGGTAAAGAAGCACCAGGCTAACTCCG  
TGCCAGCAGCTGCGGTAATACGGAGGGTGCAGCATTAATCGGAATTATTGGGCGTAAAG  
GGCGCGTAGGCGGGCAAACAAGTCAGATGTGAAATTCCGGAGCTCAACTTCGGAGCTGCA  
TTTGAAGTGTGTAGTCTAGAGGCAAGACGGAGAAAATGGAATTCCACGTGTAGCGGTGAA  
ATGCGTAGATATGTGGAAGAACACCAGTGGCGAAAGCGGTTTTCTGGTTTTATGCCAGACG  
CTGAGGCGCGAGAGCAAGGGGAGCAAACAGGATTAGAGACCCTTGTAAGTCC

>Otu7638

CCAGCCTATGGGGGAGCAGTGGGGAATATTGGACAATGGGGGAAACCCTGATCCAGCGA  
CGCCGCGTGTGTGAAGAAGGCCTTCGGGTGTAAAGCACTTTAGTCCGGGAAGAAGCGTA  
GTTGTTTTAAGAGATGGCTATGTTGACGGTACCGGAAGAATAAGCACCAGGCTAACTCTGTG  
CCAGCAGCCGCGGTAATACAGAGGGTGAAGCGCTAATCGGAGTTACTGGGCGTAAAGGG  
CGCGTAGGCGGCCATGTAAGTTAGGTGTGAAATCCCTGGGCTTAACCTAGGAACTGCACC  
TAAGACTGTGTGACTGGAGTACAGTAGAGGGCAGTGAATTTCCGGTGTAGCGGTGAGAT  
GCGTAGAGATCGGAAGGAACACCAGTGGCGAAGGCGGCTGCCTGGACTGATACTGACGCT  
GAGGCGCGAAAGCGTGGGGAGCAAACAGGATTAGATACCCTTGTAAGTCC

>Otu7641

CCAGCCTATGGGGTGCAGCAGTCGAGAATTTTTCTCAATGGGCGAAAGCCTGACGCAGCA  
ACGCCGCGTGAGGATGAAGGCCTTCGGGTGTAAACTTCTTTGGGCAGGGACGAGGAAG  
GACGGTACCTGCCAAACAAGTCACGGCTAACTACGTGCCAGCAGCCGCGGTAACACGTAG  
GTGGCAAGCGTTATCCGGAATTACTGGGCGTAAAGGGTGTGCAGGCGGGGCTGTAAGTGG  
TGTATGAAATCTCCCAGCTTAACTGGGATAGGTTATGCCAGACTGCAGTTCTAGAGGACG  
AGAGAGGGGGGTGGAATTCGGGTGTAGTGGTGAAATGCGTAGAGATACGGAGGAACCCC  
AGAGGCGAAGGCGGCCCCCTGGCTCGTACCTGACGCTCAGCCACGAAAGCATGGGGAGCG  
AACGGGATTAGAAACCCCGGTAGTCC

>Otu7642

CCAGCCTATGGGTGGCTCCAGTCAAGAACTTTGGCAATGCACGAAAGTGTGACCAAGCG  
ACGCCGCGTGATTGATGAGGCCCTTCGGGTGTAAAGATCTTTTATGCGTGAAAAAATTA  
TTGATATTAGCGCATGAATAAGGGGCTCCTAACTCTGTGCCAGCAGGAGCGGTAATACAG  
AGGCCCCGAGCGTTATCCGGAATTATTGGGCGTAAAGGGTGCGTAGGCGGCAATGTTAGT  
CGAATGTCAAAAATCAAGGCTCAACCTTGGGGAGGCATTGAAACGGCATAGCTCGAGTG  
TGTGAGAGGTGAATGGAACCTCATGGTGTAGGGGTGAAATCCGTTGATATCATGGGGAAC  
CCTAATGCGAAGGCAATTCAGTGGCACATTACTGACGCTGAAGCACGAAAGCGTGGGTAG  
CGAATGGGATTAGAAACCCCGGTAGTCC

>Otu7645

CCAGCCTATGGGACGCTGCAGTGGGGAATCTTGCGCAATGGGCGAAAGCCTGACGCAGCA  
ACGCCGCGTGAGGGATGAAGGTCTTCGGGTGTAAACCTCTTTCGAGCAGGGACGATTGT  
GACGGTACCTGCAGAAGAAGCTCCGGCCAACTACGTGCCAGCAGCCGCGGTGATACGTAG  
GGAGCGAGCGTTGTCCGATTTATTGGGCGTAAAGAGCTCGTAGGCGGCTCAGTAAGTCA  
GGTGTGAAATCCTCAGGCTCAACCTGGGGTGCCATCTGATACTGCTGTGGCTAGAGCCC  
GGTAGGGGTCCACGGAATTCCTGGTGTAGCGGTGAAATGCGCAGATATCAGGAGGAACAC  
CTGCGGTGTAGACGGCTTTCTGGACCATTGCTGACGCTGAGACACGAAAGCGTGGGTAGC  
AAACAGGATTAGAAACCCCGGTAGTCC

>Otu7653

CCAGCCTACGGGGGGCAGCAGTAACGAATCTTCCGCAATGCGCGCAAGCGTGACGGAGCG  
ACGCCGCGTGTTGGGACGAGGCCCTTCGGGGTGTAAACCACTGTCAGAGGATAGAAAGTTC  
TGATCGTCCTCAGAGGAAGGCACGGCTAACTCTGTGCCAGCAGCCGCGGTAAGACAGAGG  
TGCCGAGCGTTAGGCGGAATCACTGGGCTTAAAGCGTGTGTAGGCGGACCGTTAAGTGCC

TTGTGAAATCCCCCGGCTCAACCGGGGAACGGCTGGGCATACTGGCGGTCTTGAGTCACT  
CAGGGGTGAGCGGAACAAACGGTGGAGCGGTGAAATGCGTAGATATCGTTTGAACGCCG  
ACGGCGAAAGCAGCTGACTGGGAGTGATCTGACGCTGAGACACGAAAGCCAGGGGAGCGA  
ACGGGATTAGAAACCCCTGTAGTCC

>Otu7655

CCAGCCTATGGGTGGCAGCAGTGGGGAATCTTGACACAATGGAGGAACTCTGATGCTGCG  
ACGCCGCGTGAGCGATGAAGCCCTTCGGGGTGCAAAGCTCTTTCGACGGGAACGATAATG  
ACGGTACCTGAAGAAGCAGCTGCGGCTAACTCTGTGCCAGCAGCCGCGGTAATACAGAGG  
TCCCAAGCGTTGTTTCGATTCACTGGGCGTAAAGGGTGCGTAGGCGGTCTGGGTAAGTCTG  
ACGTGAAATCTCCGGGCCTAACCCGGAACCTGCGTCCGATACTATCCGGCTAGAGGATTG  
GAAGGGAGACTGGAATACTTGGTGTAGCAGTGAAATGCGTAGATATCAAGTGGAACACCA  
GTGGCGAAGGCGAGTCTCTGGACAATTCTGACGCTGAGGCACGAAAGCCAGGGGAGCAA  
ACGGGATTAGATACCCTTGTAGTCC

>Otu7660

CCAGCCTACGGGATGCACCAGTCGAGAATCTTTTGCAATGGGGGAAACCCTGACAAAAGCG  
ACGCCGTGTGAGCGATGAAGGCCCTTCGGGTGTAAAGCTCTTTCGCCAGGGAACAAGAGA  
GGAGAGTTAATAGCTCTCTGATTTGAGGGTACCTGGTAAAGAAGTACCGGCTAACTCCGT  
GCCAGCAGCTGCGGTAATACGGAGGGTACAAGCATTAAATCGGATTTACTGGGCGTAAAGG  
GTGCGTAGGCGGATAGGAAAGTTAGATGTGAAATTCCAGTACTCAATACTGGAGCTGCAT  
TTAAACTCCCTTTCTCGAGGATAGACGGAGAGAACCGAATTCCATGTGTAGCGGTGAAA  
TGCGTAGATATATGGAAGAACACCTGTGGCGTAAGCGGTCTCTAGTTTATTTCTGACGC  
TGAGGCACGAGAGTGTGGGGAGCAAACAGGATTAGAAACCCCTTGTAGTCC

>Otu7662

CCAGCCTACGGGGTGCAGCAGTGGGGAATATTGCACAATGGGCGCAAGCCTGATGCAGCG  
ACGCCGCGTGAGAGGATGAAGGTTTTTCGGATTGTAAACTCCTGTAAAGTGGGAAAAAGAC  
GCATACCTAATACGTATGCGGGATGATGGTACCCTAGAGAAAGCACCGGCAAACTTCGT  
GCCAGCAGCCGCGGTAATACGAAGGGTGCGAGCGTTATTCGGAATAACTGGGTGTAAAGA  
GCGTGTCGGCGGTTTTCTTAAGTCATTTCGTTAAAGGGCTCAGCTTAACTGAGTATCATGCG  
GGCGAAACTGGGAACTAGAGTGCGGGAGAGAAGAGTGGAATTCTCGGAGTAGCGGTAAA  
ATGCGTAGATCTCGAGAGGAACACCGGTTGCGAAGGCGGCTCTTTGGTCCGTAAGTACG  
CTTAAGCGCGAAAGCGTGGGGAGCAAACAGGATTAGAAACCCCGTAGTCC

>Otu7664

CCAGCCTATGGGGGGCTGCAGTGGGGAATCTTGACACAATGGGCGAAAGCCTGATGCAGCG  
ACGCCGCGTGGGGGGTGAAGCATTTTCGGTGTGTAAACCCCTTTCGACCGGGACGAATGCC  
CGCAAGGGAGTGACGGTACCGGTATAAGAAGCCCCGGCTAACTACGTGCCAGCAGCCGCG  
GTAAGACGTAGGGGGCCAGCGTTGTTTCGGAATTACTGGGTGTAAAGGGTTCGTAGGCGGT  
GCGGCAAGTTGGGAGTGAAATCTCTGGGCTCAACCCAGAGGCTGCTTCCAAAAGTGTGT  
GCTTGAGTGTGAGAGAGGCTCGTGGAATTGCAGGTGTAGCGGTGAAATGCGTAGATATCG  
GAAGGAACACCTGTGGCGAAAGCGGCTCACTGGACCACAAGTACGCTGATGCACGAAAG  
CTAGGGGAGCAAACAGGATTAGATACCCGTGTAGTCC

>Otu7670

CCAGCCTATGGGTGGCAGCAGTGGGGAATATTGGACAATGGGCGCAAGCCTGATCCAGCA  
ATGCCGCGTGTGTGAAGAAGGCCTGCGGGTTGTAAAGCACTTTCGGTGGGGAGGAGAAGC  
TCTGAGTTAATACCTTAGAGTGAGACGTTACCCACAGAAGAAGCACCGGCTAACTCTGT  
GCCAGCAGCCGCGGTAATACAGAGGGTGCAAGCGTTAATCGGAATTACTGGGCGTAAAGG  
GTGCGTAGGTGGTTTTTTAAGTTAGGTGTGAAAGTCCTGGGCTTAACCTGGGGATTGCGC  
CTAATACTGTGAGACTAGAGTACTGTAGAGGAAGGTGGAATTTCCGGTGTAGCGGTGAAA  
TGCGTAGATATCGGAAGGAACATCAGTGGCGAAGGCGACTTCTTGACAGATACTGACAC  
TGAGGCACGAAAGCGTGGGGAGCAAACAGGATTAGAAACCCGAGTAGTCC

>Otu7671

CCAGCCTACGGGTCGCAGCAGTCGAGAATCTTCGGCAATGAGCGCAAGCTTGACCGAGCG  
ACGCCGCGTGTGCGATGAAGGCCCTTCGGGTGTAAAGCACTGTGAGGGGGAGAAAGGCG  
AAAGCTTGATCTATCCCTGGAGGAAGCACGGGCTAAGTTCGTGCCAGCAGCCGCGGTAAG  
ACGAACCGTGCAAACGTTATTCGGAATCACTGGGCTTAAAGGGCGCGTAGGCGGGCCACC  
AAGTCCGGGGTGAAATCCTCCAGCTTAACTGGAGAACTGCCTCGGATACTGGAGGTCTCG  
AGGATGATAGGGGCATGCGGAACTGTAGGTGGAGCGGTGAAATGCGTTGATATCTACAGG  
AACTCCGGTGGCGAAGGCGGCATGCTGGATCATTTCTGACGCTGAGGCGCGAAAGCCAGG  
GGAGCGAACGGGATTAGATACCCCGTAGTCC

>Otu7674

CCAGCCTATGGGGTGCTCCAGTAAAGAATCTTCCACAATGGACGAAAGTCTGATGGAGCG  
ACGCCGCGTGAGGATGAAGCCCCTCGGGGTGTAAACTGCTTTTGTGTGGGAATACATTT  
TTGAAGGTACCACACGAATAAGCACCGGCCAATCTCGTGCCAGCAGCCGCGGTAATACGA  
GAGGTGCAAGCGTTATCCGGAATCACTGGGCGTAAAGCGTCCGCAGTCGGCAAGTTAAGT  
TCGAGGTTAAATCCCATCGCTCAACGATGGATTCTGTCTCGAAAACCTGGCTCGCTAGAGGA  
ATGCAGGGGCAGGCGGAATTCGTGGTGTAGGGGTAAAATCCGTTGATACCACGAGGAACA  
CCAAAAGCGAAGGCAGCCTGCTGGGCATTTCTGACGATCATGGACGAAAGCGTGGGGAG  
CAAACAGGATTAGATACCCGTGTAGTCC

>Otu7677

CCAGCCTACGGGGCGCTCCAGTGCAGAATCTTGGACAATAAGCGCAAGCTTGATCCAGCA  
ATACTACGTGAGTGAAGAAGGTCTTTGAAATGGATTGTAAAGCTCTTTTACTGAGGATGA  
TGATGACAGTACTCAGGGAATAAGTCCCGACTAACTTCGTGCCAGCAGTCGCGGTAATAC  
GGGGGGGACAAGTATTACTCAGCATAATTGGGCGTAAAGGGTGCCTAGATGGTTTTTTTTT  
GTTAGAAGTTAAATACAAGAGCTTAACTTTTGAAGACTTCTAATACGATTAGACTTGAG  
TATGATAAAAGATAGTAGTATTCTTAGTGGAAGGTGGAATTTGTAGATACTAAGAGGAC  
TTTTAATAGGCGAAAGCGACTATCTAGATCAGAACTGACGTTGAGTGCACGAAAGCATGG  
GGAGCAAACAGGATTAGATACCCGAGTAGTCC

>Otu7683

CCAGCCTATGGGTGGCTCCAGTAAGGAATATTGGGCAATGGACGAAAGTCTGACCCAGCC  
ATGCCGCGTGAGGATGAAGGTCCTCTGGATTGTAAACTCTTTTATTTGGGACGAAAAA  
AGGGAATTCCTTCTCACTTGACGGTACCAGATGAATAAGCACCGGCTAACTCCGTGCCAG  
CAGCCGCGGTAATACGGAGGGTGCAAGCGTTATCCGGATCACTGGGTTTAAAGGGTGCG  
TAGGCTGGCAGGTAAAGTCAGTGGTGAAATCTCCGGGCTTAACCCGGAACCTGCCGTTGAT  
ACTATCTGTCTTGAATGCCGTGGAGGTTAGCGGAATATGTCATGTAGCGGTGAAATGCTT  
AGATATGACATAGAACACCTATTGCGAAGGCAGCTAACTACGCGGTGATTGACGCTGAGG  
CACGAAAGCGTGGGGATCAAACAGGATTAGAAACCCCTCGTAGTCC

>Otu7687

CCAGCCTATGGGTTGCTGCAGTCGAGAATATTGACAATGGGCGAAAGCCTGATCGAGCG  
ACACCGCGTGAGGATGAAGGCCTTCGGGTGTAAACTGCGGTAGTATGCCAAGAATGCA  
AATGACTAGCATATGGAAAGAGGTGGGTAACCTTCGTGCCAGCACCAGCGGTAATACGTAG  
ACCTCAAGCGTTATCCGGATTTATTGGGCGTAAAGAGCATGTAGGAGGTTTTGTGCGTCT  
TCTGTTAAAGCCCAGAGCCTAACTCTGGAGATGCAGGAGATACGACAAGACTAGAGGGGG  
TTAGAGGTGCATGGAACCTACGGTGTAGGGGTGAAATCCGTTGATATCGTGGGGAACACC  
AAAGGCGAAGGCAGTGCCTGGGACCTTCCTGACTCTGAGATGCGAAAGCGTGGGGAGCA  
AAAAGGATTAGAAACCCTAGTAGCC

>Otu7689

CCAGCCTATGGGTGGCACCAGTGGGGAATTTTGCACAATGGGCGCAAGCCTGATGCAGCA  
ACGCCGCGTGATGATGAAGTCTTCGGATCGTAAAGCACTTTCGACCGGGACGAACAAG  
CTACTCCTAACACGAGTGGCCCTGACGGTACCGGGAGAAGAAGCACCGGCTAACTCTGTG  
CCAGCAGCCGCGGTAATACAGAGGGTGCAAGCGTTGTTTCGGAATTATTGGGCGTAAAGCG  
CGGGTAGGCGGCTTGAAAAGTCGGGTGTGAAAGCCCTCAGCTCAACTGAGGAAGTGCGCC  
CGAAACTCTCGAGCTTGAGTGCCGGAGAGGATGGCGGAATGCCCCAAGTAGAGGTGAAAT  
TCGTAGATATGGGCGGAACACCGGTGGCGAAGGCGGCCATCTGGACGGTAACTGACGCT  
GAGCCGCGAAAGCGTGGGTAGCAAACAGGATTAGAAACCCCTGTAGTCC

>Otu7690

CCAGCCTATGGGTGGCAGCAGTCGAGAATCTTCCGCAATGGACGAAAGTCTGACGGAGCG  
ACGCCGCGTGATTGATGAAGTCTTCGGGACGTAAAGATCTTTTATGGGGGAGGAAGTAA  
TTGACGTTACCCCATGAATAAGAGGCTCCTAACTCTGTGCCAGCAGGAGCGGTAATACAG  
AGGCCTCAAGCGTTACCCGGAATCACTGGGCGTAAAGGGTGTGTAGGTGGCAGTGTAGT  
CTTTCGCCAAAGCTCTCGGGCTCAACCCGGGAAATGCGGAGGAAACGGCACAGCTTTGAG  
GGTGTGAGAGGTATATGGAACCTATGGTGTAGGGGTGAAATCCGTTGATATCATGGGGAA  
CACCAAATGCGAAGGCAATATACTGGCACATTTCTGACACTGAAACACGAAAGCGTAGGT  
AGCGAATGGGATTAGAGACCCCTGTAGTCC

>Otu7693

CCAGCCTACGGGTTGCAGCAGTGGGGAATCTTGCGCAATGGGCGAAAGCCTGACGCAGCG  
ACGCCGCGTGAGTGATGAAGGCCTTCAGGTTGTAAAGCTCTGTGGGGAGGAACGAATAAG  
TCATGGCTAATACTCATGATGATGACGGTACCTCCTTAGCAAGCACCGGCTAACTCTGTG

CCAGCAGCCGCGGTAAGACAGAGGGTGCAAACGTTGTTTCGGAATCACTGGGCGTAAAGCG  
TGTGTAGGTGGTCCTATAAGTCGGATGTGAAAGCCCCGGGCTCAACCCGGGAAGTGCACC  
CGATACTGTAGGACTTGAGTACCGGAGAGGTTGGTGGAAATCTCGGTGTAGAGGTGAAAT  
TCGTAGATATCGAGAGGAACATCGGTGGCGAAGGCGGCCAACTGGACGGATACTGACACT  
GAGACACGAAAGCGTGGGGAGCAAACAGGATTAGATAACCCGAGTAGTCC

>Otu7698

CCAGCCTATGGGTCGCTGCAGTGGGGAATCTTGAGCAATGGACTAACGTCTGACTCAGTG  
AGAACACATGCATGACGAATGCGCCCAGTTTTCTGTAAAGTGCTTTCAAGGGAAAAAGAC  
AATGACTTCACCCCAAGATGAAGGGCCGACTAACTTCGTGCCAGCAGTCGCGGTAATACG  
AAGGGCCCCGGGTGTTACTCGTTTTGATTGGGTGTAAAGGGTAAGTAGGCGGTGCATGGGA  
TTTTTAGGCTAAAGCGCGGAGTGTTTCCTATGCGAAAGCCCAATCTGTAGCATCTGACTAG  
TGTTGAGGAGAGGTTTAGGCAAATTCGTAGGGAAGGGTAAAATCTTGCGAGCTACGAATG  
AACGCCGGCTGGCAAAGGCGCTTTTCCAGCCTCAACAGACGCTGAGGTACGGAAGCGTAG  
GGAGCAAACGGGATTAGAAACCCGGGTAGTCC

>Otu7705

CCAGCCTATGGGAGGCAGCAGCCGAGAATATTCGACAATGGACGAAAGTCTGATCGAGCG  
ACGCCGCGTGATGGATGAAGACCTTCGGGTCGTAAACATCTTTTATGAGGGAGAAAGTTT  
ATTGATAGTACCTCACGAATAAGGGGTGTCTAAACTCGTGCCAGCAGCAGCGGTAATACG  
AGTGCCCCGAGCGTTATCCGGAATCATTGGGCGTAAAGGGTGTGTAGGTGGCAGTGTTAG  
TCGATTGTTAAAACCTGGGGCTCAACCCAGATGTGCGATCGAAACGGCACAGCTAGAGG  
ATGGCAGGGATGTATGGAACCTCATGGAGTAGGGGTGAAATCCGTTGATATCATGGGGAAC  
ACCGAAAGCGAAGGCAGTACATTGGGCCACTCCTGACACTGAAACACGAAAGCGTGGGTA  
GCGAATGGGATTAGATAACCCCGGTAGTCC

>Otu7708

CCAGCCTACGGGTGGCACCAGTGGGGAATATTGGACAATGGGCGCAAGCCTGATCCAGCC  
ATGCCGCGTGAGTGATGAAGGCCCTAGGGTTGTAAAGCTCTTTTGTGTGGGAAGATAATG  
ACGGTACCGCAAGAATAAGCCCCGGCTAACTTCGTGCCAGCAGCCGCGGTAATACGTAGG  
TGGCAAGCGTTGTCCGGATTTATTGGGTTTAAAGGGTGCGTAGGCGGTTCTTTAAGTCAG  
TGGTGAAATACTTCGGCTCAACCGGAGAGGTGCCAATGATACTGGGGGACTTGAGTACAG  
ACGAGGTAGGCGGAATTGACGGTGTAGCGGTGAAATGCATAGATATCGTCAAGAACACCG  
ATAGCGAAGGCAGCTTACTAGACTGTAACCTGACGCTGATGCACGAAAGTGTGGGGATCAA  
ACAGGATTAGAGACCCTGGTAGTCC

>Otu7710

CCAGCCTATGGGTTGCTGCAGTGGGGAATTTTGGACACTGGGCGTAAGCTTGATCCAGCA  
ATACTGAGTGAATGAGGACGGCTATTTGGTTGTAAATTCCTTTTGTATAGAAAACATAG  
CTTGATGTAAAGAAAAAGCTCCGGCTAACTTCGTGCCAGCAGCCGCGGTAAAACGGGGG  
GAGCTAGCGTTATTCAACTTGACTGGGCGTAAAGGGCGAGTAGGTTGTTAATTTTGTGCT  
TTGTCAGACATATTAAGTAGAGTATATGAAAGGATTAGGGTACCTTTAAAGTAGAGGTGA  
TATTCGACTATAGTACAGGGACCACCGACGGGCGAAAGCGCTGATCTAGCATATTACTGA  
CGCTCAGGAGCGAAAGTATGGGTAGCGAATGGGATTAGATAACCCCGTAGTCC

>Otu7715

CCAGCCTATGGGTGGCTCCAGTGGGGAATCTTGACAATGGGGGCAACCCTGATCCAGCC  
ATGCCGCGTGAGTGAAGAAGGCCTTCGGGTTGTAAAGCTCTTTCGGACGGGACGAAATGG  
TTACAGTGAATAACTGTGATTGATGACGGTACCGTAATAAGAAGCACCGGCTAACTACGT  
GCCAGCAGCCGCGGTAATACGTAGGGTGCAGCGTTAATCGGAATTACTGGGCGTAAAGC  
GTGCGCAGGCGGTTCCGCAAGTCAGGTGTGAAATCCCCGGGCTCAACCTGGGAATTGCGC  
TTGAAACTAGCGAGCTTGAGTGTGGCAGAGGGGGTGAATTCACGTGTAGCAGTGAAA  
TGCGTAGAGATGTGGAGGAACACCGATGGCGAAGGCAGCCCCCTGGGTCAACACTGACGC  
TCATGCACGAAAGCGTGGGGAGCAAACAGGATTAGAAACCCCGGTAGTCC

>Otu7716

CCAGCCTACGGGTGTCACCAGTCGAGAATATTCACAATGGACGAAAGTCTGATGGAGCG  
ACGCCGCGTGACAGGATGAAGGCCTTCGGGTCGTAAACTGCGGTAGACAAATAATAATGCA  
AATGAATGTTTGTGCGAAAGAGGTGGGTAACTACGTGCCAGCACCAGCGGTAAAACGTAG  
ACCTCAAGCGTTATTCGGATTTATTGGGCGTAAAGCGCGTGTAGGGGGTTTCGTGCGTCT  
TCTGTTAAAGCCCACCGCTAACGGTGGAACTGCAGGAGATACGGCGAGACTAGAGGATG  
TTAGAGGTACCAGGAACACACGGTGTAGGGGTGAAATCCGTTGATATCGTGTGGAACACC  
AAAGGCGAAGGCAAGGTACTGGGACACTCCTGACCCTGAGACGCGAAAGCGTGGGGAGCA  
AAAAGGATTAGAGACCCGTGTAGTCC



>Otu7721

CCAGCCTATGGGGGGCAGCAGCCGAGAATATTCGACAATGGGCGAAAGCCTGATCGAGCG  
ATGCCGCGTGATGGATGAAGCGCTTCGGCGCGTAAACATCTTTTATGGAGGAGGAAGTTA  
TTGACGTTACTCCATGAATAAGGGGCTCCTAACTCTGTGCCAGCAGGAGCGGTAATACAG  
AGGCCCCAAGCGTTACCCGGAATTACTGGGCGTAAAGGGTGCGTAGGTGGTCATATTAGT  
CGTTCGTTAAACACTCGGGCTCAACCCGAGGACTGCGGGCGAAACGGTATGACTTGAGAG  
CGTGAGAGGTGCATGGAACCTCATGGTGTAGGGGTGAAATCCGTTGATATCATGGGGAACA  
CCGAAAGCGAAGGCAATGCACTGGCGCGTTTCTGACACTCAAGCACGAAAGCGTGGGTAG  
CGAACGGGATTAGAAACCCGAGTAGTCC

>Otu7723

CCAGCCTATGGGATGCAGCAGTAAGGAATATTGGACAATGGGCGCAAGCCTGATCCAGCC  
ATGCCGCGTGAGGATGAAGGCTCTATGGGTCGTAAACTGCTTTTGTACGGAAGAAACCC  
TCCTATGTATAGGGGGCTGACGGTACCGTAAGAATAAGGATCGGCTAACTCCGTGCCAGC  
AGCCGCGGTAATACGGAGGATCCAAGCGTTATCCGGATTTATTGGGTTTAAAGGGTGCGT  
AGGCGGACTTGTAAGTCAGTGGTGAAAGCCTGCGGCTTAACTGCAGAACTGCCATTGATA  
CTGCTGGTCTTGAGTATAGTTGAGGTGGGCGGAATGTGTCATGTAGCGGTGAAATGCTTA  
GATATGACACAGAACACCGATTGCGAAGGCAGCTCGCTAAACTATAACTGACGCTGAGGC  
ACGAAAGCGTGGGTAGCAAACAGGATTAGATACCCAGTAGTCC

>Otu7728

CCAGCCTATGGGACGCACCAGTAAGGGATATTGCGCAATGGGCGAAAGCCTGACGCAGCA  
ACGCCGCGTGAGGATGAAGGCCCTTCGGGTCGTAAACTTCTTTTCTCACTGACGAGGAAG  
GACGGTAGGTGAGGAATCAGTCACGGCTAACTACGTGCCAGCAGCCGCGGTAACACGTAG  
GTGGCGAGCGTTATCCGGATTTACTGGGCGTAAAGCGTGTGCAGGCGGAAGAACAAGTGG  
TGTATGAAATCGCTCGGCTTAACCGGGTGCTGTTATGCCAGACTGTTCTTCTAGAGTGCG  
AGAGAGGGGCGTGGAATTCCGGGTGTAGTGGTGAAATGCGTAGAGATCCGGAGGAACCCC  
AGAGGCGAAGGCGGCGCCCTGGCTCGCAACTGACGCTCAGACACGACAGCATGGGGAGCG  
AACGGGATTAGATACCCCTGTAGTCC

>Otu7730

CCAGCCTATGGGGGGCACCAGTAGGGAATATTGGACAATGGGCGCAAGCCTGATCCAGCA  
ATGCCGCGTGAGTGAAGAAGGCCCTTCGGGTTGTAAAGCTCTTTCACCCGTGACGATGATG  
ACGGTAACGGGAGAAGAAGCCCCGGCTAACTCCGTGCCAGCAGCCGCGGTAATACGGAGG  
GGGCAAGCGTTGTTCCGAATTACTGGGCGTAAAGGGCGCGTAGGCGGCTTGCGAAGTTAG  
GCGTGAAAGCCCTGGGCTTAACCCAGGAATTGCGCTTGAGACTGCTAGGCTTGAGTGCGG  
AAGAGGTGAGTGGAATTCACAGTGTAGAGGTGAAATTCGTAGATATTGGGAAGAACACCA  
GTGGCGAAGGCGGCTCACTGGTCCGCAACTGACGCTGAGGCGCGAAAGCGTGGGGAGCAA  
ACAGGATTAGAAACCCGAGTAGTCC

>Otu7735

CCGCCTACGGGTTGCAGCAGTGAAGAATCTTGGGCAATGGACCGATGTCTGACCCAGTGA  
GAATACATGCATGACGAAGGCGCTCAGTTTTCTGTAAAGTGCTTTTAACAACGAAAAGAC  
TGTCTGAAGTTGTCAAAGAAGCACCGGCCAACTCCGTGCCAGCAGCCGCGGTAAGACGGA  
GGGTGCGGGCGTTATTTCGTTTTGATTGGGTGTAAAGGGTATGTAGGTGGGCATCGAAAAT  
TTTAGACAAAATGGCGAAGTAGTTCTATGCACTGTCTTTTTTTATAAACTGGTGTCTAGA  
GTTGAAGATAAGTCGGAGTAATTTCCCTAAGTAGGGGTAAAATCCGTCTATATAGGAACGA  
ACGCCAACAGGCGAAGGCATCCCTCTCGCTTCAACCAACGCTAATGTACGGAAGCCTAGG  
GCGCAAACGGGATTAGAAACCCCTCGTAGTCC

>Otu7744

CCAGCCTACGGGTGGCACCAGTGGGGAATATTGGGCAATGGGCGCAAGCCTGACCCAGCC  
ATGCCGCGTGAGTGATGAAGGCCCTTCGGGTCGTAAAGCTCTGTGGGGAGGGACGAACAGT  
CTTGGTGTTAATACCACCAGGGCCTGACGGTACTTCCTTAGCAAGCACCGGCTAACTCCG  
TGCCAGCAGCCGCGGTAATACGGAGGGTGCAAACGTTGCTCGGAATCATTTGGGCGTAAAG  
CGCACGTAGGCGGTCTTTTAAGTCGGGTGTGAAAGCCCTGGGCTCAACCCAGGAAGTGCA  
CTCGAAACTGAAAGGCTAGAGTACGGAAGAGGGTCTCGGAATTCCCAGGTGTAGAGGTGAA  
ATTCGTAGATATCGGGAGGAACACCAGTGGCGAAGGCGGAGACCTGGGCCGATACTGACG  
CTGAGGTGCGAAAGCGTGGGGAGCAAACAGGATTAGAGACCCCGGTAGTCC

>Otu7746

CCAGCCTACGGGGCGCTGCAGTGGGGAATATTGCACAATGGGCGCAAGCCTGATGCAGCG  
ACGCCGCGTGAGGATGAAGGTTTTCGGATTGTAAACTCCTGTTAAGTGGGAAGAAAGAA  
CCGGTATTAATACCATCGGGAGATGACGGTACCACTAGAGAAAGCACCGGCTAACTTCGT

GCCAGCAGCCGCGGTAATACGAGGGGTGCAAGCGTTATTCGGAATAACTGGGCGTAAAGA  
GCGCGTAGGCGGCTTGTTAAGTTTGTTGTTAAATTGTTTCGGCCTAACCGAGCATCGGCAG  
TAAATACTGGCAAGCTAGAGGACAAGAGAGAGGGGTGGAATTCTCGGAGTAGCGGTAAAA  
TGCGTAGATCTCGAGAGGAACACCGATGGCGAAGGCAGCCCCTTGGCTTGTATCTGACGC  
TCAAGTGCGAAAGCGTGGGGAGCAAACAGGATTAGATAACCCGAGTAGTCC

>Otu7749

CCAGCCTACGGGTGGCACCAGTGGGGAATTTTGGACAATGGGGGCAACCCTGATCCAGCC  
ATGCCGCGTGTGTGAAGAAGGCCTTCGGGTGTAAAGCACTTTCGGACGGAACGAAATCG  
CACGGGTGAATATCCCGTGTGGATGACGGTACTGTAAGAAGAAGCACCGGCTAACTACGT  
GCCAGCAGCCGCGGTAATACGTAGGGTGCAGCGTTAATCGGAATTACTGGGCGTAAAGC  
GTGCGCAGGCGGCTTCGCAAGTCAGACGTGAAATCCCCGGGCTTAACCTGGGAATGGCGT  
TTGAAACTACGGAGCTGGAGTGTGGCAGAGGGAGGTAGAATTCACGTGTAGCGGTGAAA  
TGCGTAGATATGTGGAGGAATACCGATGGCGAAGGCAGCCTCCTGGGCCAACACTGACGC  
TCATGCACGAAAGCGTGGGGAGCAAACAGGATTAGATAACCCAGTAGTCC

>Otu7750

CCAGCCTATGGGGCGCTGCAGTGGGGAATATTGGACAATGGGGGCAACCCTGATCCAGCG  
ATGCCGCGTGGGTGAAGAAGGCCTTCGGGTGTAAAGCCCTTTAGGTTGGGACGAAGAGT  
GGTAGGTTAATACCCTATTATTTTGACGGTACCGACAGAATAAGCACCGGCAAACCTCTGT  
GCCAGCAGCCGCGGTAATACAGAGGGTGCAGCGTTAATCGGAATCACTGGGCGTAAAGG  
GCGCGTAGGCGGTTAGATGTGTGTGATGTGAAAGCCCTGGGCTTAACCTAGGAAGTGCAT  
CGCAAACCTATATAACTGGAGTAGATGAGAGGGTGGCGGAATTTCCGGTGTAGCGGTGAAA  
TGCGTAGAGATCGGAAGGAACGTCAATGGCGAAGGCAGCCACCTGGCATCATACTGACGC  
TGAGGCGCGAAAGCGTGGGGATCGAACAGGATTAGATAACCTCGTAGTCC

>Otu7753

CCAGCCTACGGGGGGCAGCAGTGGGGAATATTGGACAATGGGCGCAAGCCTGATCCAGCC  
ATGCCGCGTGTGTGATGAAGGCCTTAGGGTTGTAAAGCACTTTCACCGGAGAAGATAATG  
ACGGTATCCGGAGAAGAAGCCCCGGCTAACTTCGTGCCAGCAGCCGCGGTAATACGAAGG  
GGGCTAGCGTTGTTTCGGAATTACTGGGCGTAAAGCGCACGTAGGCGGATATTTAAGTCAG  
GGGTGAAATCCCAGAGCTCAACTCTGGAGCTGCCTTTGATACTGGGTATCTTGAGTATGG  
AAGAGGTAAGTGGAATTGCGAGTGTAGAGGTGAAATTCGTAGATATTCGCAGGAACACCA  
GTGGCGAAGGCGGCTTACTGGTCCATTACTGACGCTGAGGTGCGAAAGCGTGGGGAGCAA  
ACAGGATTAGAAACCCCTGTAGTCC

>Otu7754

CCAGCCTATGGGGTGCAGCAGTGGGGAATATTGGACAATGGGGGAAACCCTGATCCAGCA  
ATGCCGCGTGTGTGAAGAAGGCCTTCGGGTGTAAAGCACTTTTGTTGGGGAGGAAGGCG  
TGGAACACGATTGACTTAACCCAAAGAAACAGCACCGGCTAACTCTGTGCCAGCAGCCG  
CGGTAATACAGAGGGTGCAGCGTTAATCGGAATTATTGGGCGTAAAGCGCACGTAGGCG  
GTTTGATAAGTTAGATGTGAAATACCTGGGCTTAACCTGGGGATGTCATCTAATACTGTC  
AGACTAGAGTAGAGTAGAGGAAGGCGGAATTCCTGGTGTAGCGGTGAAATGCGTAGATAT  
CGGGAGGAACATCAGTGGCGAAGGCGGCCTTCTGGACAAATACTGACGCTGAGGAGCGAA  
AGCGTGGGGAGCAAACAGGATTAGAAACCCGCGTAGTCC

>Otu7757

CCAGCCTACGGGGGGGCTGCAGTCGAGGATCTTCGTCAATGGGCGAAAGCCTGAACGAGCG  
ACGCCGCGTGCATGATGAAGGCCTTCGGGTGTAAAGTGCGAAAGTGGGGACAAAGCCGC  
AAGGTTGATTGATCCACAGTAAGGACGGGCTAAGTTTCGTGCCAGCAGCCGCGGTAAAGACG  
AACTGTCCTAACGTTGTTTCGGAATCACTGGGCTTAAGGGCGCGTAGGCGGTCGACCAAG  
TCAGGGGTGAAATCCCGCAGCTTAACTGCGGAAGTGCCTTTGATACTGGTTGTCTCGAGG  
GAGGTAGGGGTGTGTGAACTCACAGTGGAGCGGTGAAATGCGTTGATATTGTGAGGAAC  
GCCGAGGCGAAAGCGACGCACTGGACCTTCTTGACGCTGAGGCGCGAAAGCTAGGGGA  
GCAAACGGGATTAGATAACCCGTGTAGTCC

>Otu7760

CCAGCCTATGGGTGGCACCAGTGAGGAATCTTCCACAATGGGCGAAAGCCTGATGGAGCG  
ACGCCGCGTGCAGGATGAAGGCCTTCGGGTGTAAACTGCTTTTATAAGTGAAGAATATG  
ACGGTAACTTATGAATAAGCACCGGCTAACTACGTGCCAGCAGCCGCGGTCATACGTAGG  
GTGCAAGCATTATCCGGAGTGACTGGGCGTAAAGAGTTGCGTAGGTGGACAAGTAAGCGA  
ATAGTGAAATTTGACGGCTCAACCGTACAACTATTATTGCAACTGCTTGTCTCGAGAAT  
GGTAGAGGTAACCGGAATTTCTTGTGTAGGAGTGAAATCCGTAGATATAAGAAGGAACAC  
CAATGGCGTAGGCAGGTTACTGGACCATTCTTGACACTAAGGCACGAAAGCGTGGGGAGC

GAACCGGATTAGAAACCCCCGTAGTCC

>Otu7763

CCAGCCTATGGGATGCTCCAGTGGGGAATCTTGCGCAATGGGCGAAAGCCTGATGCAGCA  
ACGCCGCGTGAGGATGAAGGCTTTCGGGTCGTAAACTCCTTTTTTGACCTGACGAGGAAG  
GACGGTAGGGTCAGAATAAGTCACGGCTAACTACGTGCCAGCAGCCGCGGTAAACGTAG  
GTGGCGAGCGTTATCCGGATTACTGGGCGTAAAGCGTGTGCAGGCGGGCTGTCAAGTGG  
TGTATGAAAGGTCTGGGCTAAACCCAGATAGGTTATGCCAGACTGGCAGTCTTGAGTACG  
AGAGAGGGACGTGGAATTCCGGGTGTAGTGGTGAAATGCGTAGAGATCCGGAGGAACCCC  
AGAGGCGAAGGCGGCGTCTGGCTCGATACTGACGCTCAGACACGACAGCATGGGGAGCG  
AACGGGATTAGAGACCCGTGTAGTCC

>Otu7765

CCAGCCTACGGGGGGCAGCAGTCGAGAATCTTTCACAATGGGGGCAACCCTGATGGAGCG  
ACGCCGCGTGAGGATAAGGTCTTCGGATTGTAAACTCCTGTCATGTGAGAACAAAGCCC  
TTTGGGTCTGATAGTATCACAAGAGGAAGAGACGGCTAACTCTGTGCCAGCAGCCGCGGT  
AATACAGAGGTCTCAAGCGTTGTTTCGGAATCACTGGGCGTAAAGGGTGTGTAGGCGGCGT  
GGAAAGTCAGATGTGAAATCCGGGGGCTCAACCCCCGAATAGCATCCGATACTGCCATGC  
TCGAGGTCTGTAGAGGAGTCTGGAATTTTCGGTGTAGCAGTGAAATGCGTAGATATCGAA  
AGGAACACTTATAGCGAAGGCAAGACTCTGGGCAGAATCTGACGCTGAAACACGAAGGCC  
AGGGTAGCGAACGGGATTAGATACCCTTG TAGTCC

>Otu7776

CCAGCCTACGGGTGGCACCAGTCGAGAATCTTCGGCAATGTGCGCAAGCCTGACCGAGCG  
ACGCCGCGTGAGGACGAAGGCCCTTCGGGTGTAAACTCCTGTGAGGGGAAGGAAGAGA  
CGGCGCAGAGCCGTTTTTTGACCGCTCCCTGGAGGAAGCACGGGCTAAGTTCGTGCCAGCA  
GCCGCGGTAAGACGAACCGTGCGAACGTTATTCGGAGTCACTGGGCTTAAAGCGCGTGTA  
GGCGGACTGCCACGTCGGGCGCTGAAATCCCCCGGCTCAACCGGGGAATGGGCACCGATA  
CGAGCAGTCTCGAGGGGAGTAGGGGGACCTGGAACCTCCGGTGGAGCGGTGAAATGCGTT  
GAGATCGGAAGGAACGCCCGTGCGGAAAGCGAGGTCTGGGCTTCTACTGACGCTGAGAC  
GCGAAAGCTAGGGGAGCAAACGGGATTAGAAACCCAGTAGTCC

>Otu7781

CCAGCCTATGGGGGGCAGCAGTTAGGAATCTTGCAACAATGGGGGAAACCCTGATGCAGCG  
ACGCCGCGTGCGGGACGAAGGCCCTCGGGTCGTAAACCGCTTTCAGCAGGAGCGAAATTG  
ACGGTACCTGCAGAAGAAGCCCCGGCCAACTACGTGCCAGCAGCCGCGGTAATACGTAGG  
GGGCAAGCGTTGTCCGGATTCAATTGGGCGTAAAGAGCTCGTAGGCGGTTCCGTAAGTCAG  
GTGTGAAATCTCTGCGTTCAACGCAGAGCGGCCACCTGATACTGCCGTGACTCGAGTCCG  
GTAGGGGAGTGTGGAATTCCTGGTGTAGCGGTGAAATGCGCAGATATCGGGAGGAACACC  
AGTAGCGAAGGCGGCACTCTGGGCCGTGACTGACGCTGAGGAGCGAAAGCGTGGGTAGCA  
AACAGGATTAGATACCCCGTAGTCC

>Otu7782

CCAGCCTATGGGTGGCTGCAGTAGGGAATATTGGACAATGGGCGCAAGCCTGATCCAGCC  
ATCCCGCGTGAGGATTAAGGTCCTATGGATTGTAAACTCTTTTCTCTGGGAATAAAAA  
CCCCGACTTGTGCGGGCTTGAAGGTACCAGAGGAATAAGCACCGGCTAACTCCGTGCCAG  
CAGCTGCGGTAATACGGAGGGTGCAAGCGTTATCCGGATTCACTGGGTTTAAAGGGTGCG  
TAGGTGGCTTTGTAAGTCAGTGGTGAAAGCCCGAGCTCAACTCCGGAACCTGCCATTGAT  
ACTGCTTAGCTTGAATCAGGTAGAGGTGGATGGAATATTACATGTAGCGGTGAAATGCTT  
AGAGATGTAATAGAACACCAATTGCGAAGGCAGTTCCTATGCCTGCATTGACACTGAGG  
CACGAAAGCGTGGGGATCAAACAGGATTAGAAACCCGAGTAGTCC

>Otu7785

CCAGCCTACGGGTGCAACAGCCGAGAATATTGCACAGTGGGCGCAAGCCTGATCGAGCG  
ATACCGCGTGGTGGATGAAGCGCTTCGGCGCGTAAACATCTTTTATGGAGGAGGAAGTAA  
TTGACGTTACTCCATGAATAAGGGGCTCCTAACTCTGTGCCAGCAGGAGCGGTAATACAG  
AGGCCCCGAGCGTTACCCGGAATTACTGGGCGTAAAGAGTGTGTAGGTGGTCATGTTAGT  
CGTTCGTTGAATCCCGGGGCTCAACCCCGGAATCGCGGGCGAAACGGCATGACTTGAGGG  
CGTGAGAGGTATGTGGAACCAAGGTGTAGGGGTGAAATCCGTTGATATCTTGAGGAACA  
CCGAAAGCGAAGGCAGCATACTGGCGCGTTCCTGACACTCAAACACGAAAGCGTGGGTAG  
CGAACAGGATTAGAAACCCGCGTAGTCC

>Otu7789

CCAGCCTACGGGTGGCAGCAGTCGAGAATCTTCGGCAATGAGCGCAAGCTTGACCGAGCG  
ACGCCGCGTGAGCGATGAAGGCCCTTCGGGTGTAAAGCTCTTTAGTGGGGGAGAAAAGCC

GAAAGGTCTGATCTATCCCTGGAGGAAGCACGGGCTAAGTTCGTGCCAGCAGCCGCGGTA  
AGACGAACCGTGCGAACGTTGTTTCGGAATCACTGGGCTTAAAGGGCGCGTAGGCGGGCCG  
CAAAGTCAGGGGTGAAATCCTCCAGCTTAACTGGAGAACTGCCTTTGATACTGGCGGTCT  
GGAGTAAGGTAGGGGCATGCGGAACTGATGGTGGAGCGGTGAAATGTGTTGATATCATCA  
GGAATCCGGTGGCGAAAGCGGCGTGCTGGACCTTTACTGACGCTGATGCGCGAAAGCCA  
GGGGAGCAAACGGGATTAGAAACCCGAGTAGTCC

>Otu7791

CCAGCCTATGGGAGGCAGCAGTCGAGAATTTTTCTCAATGGGGGAAACCCTGAAGGAGCG  
ACGCCGCGTGAGGATGAAGGTCTTCGGATTGTAACTCCTGTCATTAGAGAACAAAACC  
CACTTAGTAAGTATGATGTTGGGTTTGATAGTATCTGAAGAGGAAGAGACGGCTAACTCTGT  
GCCAGCAGCCGCGTAATACAGAGGTCTCAAGCGTTGTTTCGGATTTCATTGGGCGTAAAGG  
GTGCGCAGGCTGCGAGGTGAGTCGGACGTGAAATCCCGGGGCTTAACCCCGGAACTGCGT  
TCGATACTGCCTTGCTTGAGGACTGGAGAGGAGACTGGAATTCCTGGTGTAGCAGTGAAA  
TGCGTAGATATCAGGAGGAACACCAGTGGCGAAGGCGAGTCCCTGGACGACTCCTGACAC  
TGAGGCACGAAAGCTAGGGGAGCAAACAGGATTAGAAACCCAGTAGTCC

>Otu7792

CCAGCCTACGGGGGGCAGCAGTTAGGAATTTTGCGCAATGGCCGAAAGGCTGACGCAGCA  
ACGCCGCGTGAGGGATGACGGTCTTCGGATTGTAAACCTCTTTTAGTTAGGAAAAACAA  
ATGATGGTACTGACAGAAAAAGCACCGGCTAACTACGTGCCAGCAGCCGCGGTAATACGT  
AGGGTGCAAGCGTTATTCGGAATTATTGGGCGTAAAGCGCATGTAGGTGGCTTCGTAAGT  
CTGATGTGAAATCCCTGGACTCAATTCAGGAACTGCATTGGATACTGCGAGGCTAGAGTA  
GAGGAGGGGTAGGCGGAATTCCAGGTGTAGAGGTGAAATTCGTAGATATCTGGAGGAACA  
ACAGTGGCGAAGGCGGCTTACTGGACTCTAACTGACACTGAGATGCGAAAGTGTGGGGAG  
CAAACAGGATTAGATACCCTCGTAGTCC

>Otu7796

CCAGCCTATGGGGCGCTGCAGTGGGGAATATTGGACAATGGGGGAAACCCTGATCCAGCG  
ACGCCGCGTGTTGTGAAGAAGGCCTGCGGGTTGTAAAGCACTTTTAGTGGGGATGAAAAGT  
TCAGGGCTAATACCCTTGATGTTGACCTAACCCACAGAAAAAGCACCGGCTAACTCTGT  
GCCAGCAGCCGCGTAATACAGAGGTGCAAGCGTTAATCGGAATTACTGGGCGTAAAGC  
GTGCGTAGGCGGTTTCGTAAGTCGGGTGTGAAAGCCCCGGGCTCAACCTGGGAATTGCAT  
TCGAGACTGCGAAGCTAGGGTGCAGGAAGAGGGAAGCGGAATTTCTGGTGTAGCGGTGAAA  
TGCGTAGATATCGGAAGGAACACCAGTGGCGAAGGCGACTTCCTGGTCAATACTGACGT  
TCATGTGCGAAAGCGTGGGGAGCAAACAGGATTAGATACCCAGTAGTCC

>Otu7801

CCAGCCTATGGGACGCAGCAGTAGGGAATATTGGGCAATGGGCGCAAGCCTGACCCAGCC  
ATCCCGCGTGAAAGGATGAAGGCCCTCTGGGTGCTAACTTCTTTTGTGGGGAAGAAAAA  
TTGGGATTTCATCCCGACTTGACGGTACCCAACGAATAAGCACCGGCTAACTCCGTGCCAG  
CAGCCGCGGTAATACGGAGGGTGCAAGCGTTATCCGGATTCACTGGGTTTAAAGGGTGCG  
TAGGCGGCTATGAAAGTCAGTGGTGAAGCCCGCAGCTTAACTGCGGAACTGCCATTGAA  
ACTTCATAGCTGGAGTATTATTGAAGTGGGCGGAATACATCATGTAGCGGTGAAATGCTT  
AGATATGATGTAGAATCCGATTGCGAAGGCAGCTCACTAAATAATAACTGACGCTGAAG  
CACGAAAGCGTGGGTAGCAAACAGGATTAGAAACCCGTGTAGTCC

>Otu7809

CCAGCCTACGGGTGCGACCAGTTTCGAATCATTCACAATGGGCGAAAGCCTGATGGTGC  
ACGCCGCGTGAGGGATGAAGGTCTTCGGATTGTAAACCTCTGTCACTAGGGAAGAAACGC  
TTCAAGTTAACAGCTTGAAGCCTGACTTAACCTGGAGAGGAAGCAGTGGCTAACTCTGTG  
CCAGCAGCCGCGTAATACAGAGACTGCAAGCGTTATTCGGATTCACTGGGCGTAAAGGG  
TGCGTAGGCGGTTGGGTAAGTCTGACGTGAAATCTCCGGGCCTAACCCGAAACTGCGTT  
GGATACTATCCGGCTAGAGGATTGGAAGGGAGACTGGAATACTTGGTGTAGCAGTGAAAT  
GCGTAGATATCAAGTGGAACACCAGTGGCGAAGGCGAGTCTCTGGACAATTCCTGACGCT  
GAGGCACGAAAGCCAGGGGAGCAAACGGGATTAGAAACCCGGGTAGTCC

>Otu7812

CCAGCCTATGGGTGCGCAGCAGTCGAGAATTTTTCTCAATGGCGGAAGCCTGAACCAGCCA  
TGCCGCGTGACAGGAAGACGGCCCTACGGGTGTAAACTGCTTTTGCAGGGGAATAAACCT  
CCCGACGAGTCGGGAGTTGAATGTACTCTGAGAATAAGGATCGGCTAACTCCGTGCCAGC  
AGCCGCGGTAATACGGAGGATCCGAGCGTTATCCGGATTTATTGGGTTTAAAGGGTGCGT  
AGGCGGCTTTTTTAAGTCAGGGGTGAAAGACGGTAGCTTAACTATCGCAGTGCCCTTGATA  
CTGAAGAGCTTGAATGTACTAGAGGTAGGCGGAATGTGACAAGTAGCGGTGAAATGCATA

GATATGTCACAGAACACCAATTGCGAAGGCAGCTTACTATGGTATGATTGACGCTGAGGC  
ACGAAAGCGTGGGGATCAAACAGGATTAGAAACCCTCGTAGTCC

>Otu7813

CCAGCCTATGGGTGGCAGCAGTGAGGAATATTGGACAATGGGGGAAACCCTGATCCAGCC  
ATGCCGCGTGAGTGATGAAGGCCTTCGGGTGTAAACTCTTTTAGATGTGACGATGATG  
ACGGTAACATCAGAAAAAGCTCCGGCTAACTTCGTGCCAGCAGCCGCGGTAATACGAAGG  
GAGCGAGCGTTGTTTCGAATCACTGGGCTTAAAGCGTGCGTAGGCGGAAATGTAAGTCAG  
AAGTGAAAGCCCAGGGCTCAACCCTGGAAGTCTTTTGAGACTGCAATTCTAGAATTCGG  
TAGAGGCTAGTGGAATGTCCAGTGTAGAGGTGAAATTCGCAGATATTGGACGGAACACCA  
GTGGCGAAAGCGACTAGCTGGGCCGATATTGACGCTGAGGTACGAAAGCGTGGGTAGCAA  
ACAGGATTAGAAACCCTGTAGTCC

>Otu7815

CCAGCCTATGGGACGCTGCAGTGGAGAATCTTGGACAATGGGCGAAAGCCTGATCCAGTC  
ACGTTGCGTGAGATCTCTCTTTTTTCAATGAAGATCATGACCGTAATTGAAGAATAAGTC  
CTGGCTAACCTCGTGCCAGCAGCTGCGGTAAAGACGAGGAGGACAAGCGTTCTTCGATATC  
ACTAGGCGTAAAGTCCAGTAAGGTGGTACTAAGTAAAAGAACTTCATCTGAAAGTCAAAA  
TTCAGCAAGTTCTCAAACCTTCTACTAGAGCATGAAGAAAGAAAAAGGAATTTCCAAAGGA  
GTGGTAAAATACGTTGAGATTGGAGGGAAGACCAAAGGCGAAGGCATTTTTCTATTTTCAT  
ACTGACACTGATCTGGGAAAGTCTGGGGAGCAAATGGGATTAGAGACCCCAGTAGTCC

>Otu7825

CCAGCCTATGGGGGGCAGCAGTGGGGAATCTTGCGCAATGGGCGAAAGCCTGACGCAGCG  
ACGCCGCGTGTGCGATGAAGGTCTTCGGATCGTAAAGCACTGTCGCCCGGGAAGAAACCT  
GACGGTACCGGGAGAGGAAGCACCGGCTAACTCTGTGCCAGCAGCCGCGGTAATACAGAG  
GGTGCGAGCGTTGTTTCGAATTATTGGGCGTAAAGCGCTGGTAGGTGGCAAGGCCAGTCG  
CGTGTGAAATCTCCCGGCTCAACCGGGAAAGTGC GCGCGAAACTACCTTGCTTGAGTGAC  
GGAGAGGGTTCGCGGAATTCCCGGTGTAGAGGTGAAATTCGTAGATATCGGGAGGAACACC  
AGAGGCGAAGGCGGCGACCTGGAAGTCCACTGACACTGAGCAGCGAAAGCGTGGGGAGCA  
AACAGGATTAGAGACCCTCGTAGTCC

>Otu7826

CCAGCCTATGGGGTGCAGCAGTAGGGAATATTGCGCAATGGACGAAAGTCTGACGCAGCG  
ACGCCGCGTGAGTGATGAAGGCCTTAGGGTCGTAAAGCTCTGTTGAATGGGAAGAAAAAA  
ATGACGGTACCATTCGAGAAAGGATCGGCTAACTTCGTGCCAGCAGCCGCGGTAATACGA  
GGGATCCTAGCGTTGTTTCGAATTATTGGGCGTAAAGGGTGTGTAGGCTGCCATACAAGT  
CAGTTGTGAAAGCCCCGGGCTCAACCCGGGAAGTGCTTCTGATACTGTTTGGCTTGAATA  
CTGGAGAGGACAGTGGAATTCTTGGTGTAGTGGTGAATACGTAGATATCAGGAGGAACA  
CCGGCGGCGAAGGCGGCTGTCTGGCCATGTATTGACGCTGAAACACGAAAGCGTGGGGAG  
CAAACAGGATTAGATACCCAGTAGTCC

>Otu7828

CCAGCCTACGGGGGGCAGCAGTAGGGAATATTGGACAATGAGCGAAAGCTTGATCCAGCA  
ATACCGTATGAGCGATGAAGGCCAAACTGGTTGTAAAGCTATTTTCGTTGAGGAAGATAAT  
GACACGAATCAAAGAAAGAAGTCCCGCCAATGCCGTGCCAGCAGCCGCGGAAATACGGT  
AGGGGCAAGCGTTATTACATTATATGGGCGTAAAGGGTGCCTAGGTGGTATTAATAACT  
TTTTTATAAAAAACAAAGCATAACTTTGTAAAATAATTAATAATGTTAATTCTAGAGTGA  
GGTTGAGGTTAATGGAATTTCTAGTGGAGAGGTAGAATTCTGCGATATTAGAAGGAACAC  
CAAAGGCGAAGGCAATTTTCTGGGTCTACACTGACATTGAGGCACGAAGGCATAGGGATC  
AAATGGGATTAGAAACCCCCGTAGTCC

>Otu7838

CCAGCCTATGGGTGCGTGCAGTGGGGAATTTTGGACAATGGGGGCAACCCTGATCCAGCA  
ATGCCGCGTGAGTGAAGAAGGCCTTCGGGTGTAAAGCTCTTTTGTCCGGGAAGAGACGG  
TTTGGGCTAATACCCTGGGCTAATGACGGTACCTGAAGAATAAGCACCGGCTAACTACGT  
GCCAGCAGCCGCGGTAATACGTAGGGTGAAGCGTTAATCGGAATTACTGGGCGTAAAGC  
GTGCGCAGGCGGTTGTGTAAGACAGGTGTGAAATCCCCGGGCTTAACCTGGGAATGGCAT  
TTGTGACTGCACGGCTAGAGTGTGTCAGAGGGGGGTAGAATTCACGTGTAGCAGTGAAA  
TGCGTAGAGATGTGGAGGAATACCGATGGCGAAGGCAGCCCCCTGGGGTAACACTGACGC  
TCATGCACGAAAGCGTGGGGAGCAAACAGGATTAGATACCCAGTAGTCC

>Otu7844

CCAGCCTACGGGGTGCAGCAGTGGGGAATATTGGACAATGGGGGAAACCCTGATCCAGCA  
ATGCCGCGTGAGTGATGAAGGCCCTAGGGTTGTAAAGCTCTTTTATTGGGGAAGATTATG

ACGGTACCCAAGGAATAAGCACCGGCTAACTTCGTGCCAGCAGCCGCGGTAATACGAAGG  
GTGCAAGCGTTGTTTCGGAATGACTGGGCGTAAAGGGAGCGTAGGCGGTTTTGTACGTTTTG  
ATGTGAAAGTCCTGGGCTCAACCTGGGGACGGCATGAAATACGGCAAGACTTGAGGCCTT  
GAGAGGAAGATGGAATTGTGTGTGTAGAGGTGAAATTCGTAGATATACACAAGAACACCA  
GTGGCGAAGGCGATTTTCTGGCAAGGACCTGACGCTAAGGCTCGAAAGCGTGGGGAGCAA  
ACAGGATTAGATACCCCCGTAGTCC

>Otu7848

CCAGCCTACGGGGCGCTGCAGTGGGGAATATTGGACAATGGGCGCAAGCCTGATCCAGCA  
ATGCCGCGTGAGTGATGAAGGCCTTAGGGTTGTAAAGCTCTTTCGGCGGGGACGATGATG  
ACGGTACCCGCGAGAAGAAGCCCCGGCTAACTTCGTGCCAGCAGCCGCGGTAATACGAAGG  
GGGCAAGCGTTGTTTCGGAATTACTGGGCGTAAAGAGTGTGTAGGCGGTGCTCTAAGTTTG  
GTGTGAAATCTCCCGGCTCAACTGGGAGGGTGCGCCGAAGACTGGAGTGCTCGAGCGTGG  
GAGAGGAAAGCGGAATTCCTGGTGTAGCGGTGAAATGCGTAGATATCAGGAGGAACACCT  
GTGGTGTAGACGGCTTTCTGGACCATTGCTGACGCTGAGACACGAAAGCGTGGGTAGCAA  
ACAGGATTAGAAACCCCTAGTAGTCC

>Otu7849

CCAGCCTATGGGGGGCAGCAGTGGGGAATCTTGACAATGGGGGAAACCCTGATGCAGCG  
ACGCCGCGTGAGCGATGAAGCCCCCTCGGGGTGTAAAGCTCTTTCGACGGGAACGATTGTG  
ACGGTACCTGTAGAAGAAGCCCCGGCTAACTTCGTGCCAGCAGCCGCGGTAATACGAAGG  
GGGCTAGCGTTGCTCGGAATTACTGGGCGTAAAGGGCGCGTAGGCGGGCGTTTAAGTCAG  
AGGTCAAAGCCCAGGGCTCAACCCTGGAAGTGCCTTTGATACTGGGCGCCTAGAGTGCGG  
GAGAGGTGAGTGGAATCCGAGTGTAGAGGTGAAATTCGTAGATATTTCGGAAGAACACCA  
GTGGCGAAGGCGACTCACTGGCCCCTTACTGACGCTGAGGCGCGAAAGCGTGGGGAGCAA  
ACAGGATTAGAAACCCCGTAGTCC

>Otu7851

CCAGCCTATGGGGGGCACCAGTGGGGAATTTTACACAATGGGCGAAAGCCTGATGTAGCG  
ACACCGCGTGAGCGAAGAAGCCCTTTGGGGTGTAAAGCTCTGTCAACAGGGACGAACACA  
ATGACGGTACCAGTGGAGGAAGCATCGGCTAACTACGTGCCAGCAGCCGCGGTAAGACGT  
AGGATGCAAGCGTTGTCCGGATTTATTGGGCGTAAAGAGTTCGTAGGCGGTTTTGTTAAGT  
CTGGTGTAAAGATCGGGGCTCAACCTCGGGAGTGCATTGGATACTGGCAGACTTGAGTA  
CAGTAGAGGTAAGTGGGAATTTCCAGTGTAGCGGTGAAATGCGTAGATATTGGGAAGAACA  
CCAGTGGCGTAGGCGACTTACTGGGCTGTTACTGACGCTGAGGAACGAAAGCCAGGGGAG  
CGAATGGGATTAGAAACCCCGTAGTCC

>Otu7852

CCAGCCTATGGGAGGCTCCAGTAGGGAATTTTCCACAATGGGCGAAAGCCTGATGGAGCA  
ACGCCGCGTGCAAGATGAAGGCCTTAGGGTTGTAAACTGCTTTTCTCTGTGACGATTATG  
ACGCTAACAGAGGAATAAGGATCTGCTAACTCCGTGCCAGCAGCCGCGGTCATACGGGGG  
ATCCAAGCGTTATCCGGAATTACTGGGCGTAAAGAGTTGCGTAGGTGGCATGGTAAGTTG  
GTATTGAAAGCGTGTGGCTCAACCACATAAAACAATACTAAAAGTGCCTAGAGGGCG  
AGTGAGGTACCTGGAATTTCTAGTGTAGGAGTGAATCCGTAGATATTGGGAGGAACACC  
AATGGCGTAAGCAGGGTACTGGCTCGTTCTTGACACTCAGGCACGAAAGCGTGGGGAGCA  
AACGGGATTAGATACCCTCGTAGTCC

>Otu7857

CCAGCCTATGGGGGGCTGCAGTGGGGAATCTTGACAATGGACGAAAGTCTGATGCAGCA  
ACGCCGCGTGGGGGATGAAGCTTTTTCGGAGTGTAAACCCCTTTTCGACCCGGAAGAATGCC  
CGCAAGGGCTTGACGGTACCGGAAGAAGAAGCCCCGGCTAACTTCGTGCCAGCAGCCGCG  
GTAATACGAGGGGGCGAGCGTTGTTTCGGAAGTATTGGGCGTAAAGGGTGCGTAGGCGGT  
TTGGTAAGTCTTATGTGAAATCTATGGGCTCAACTCATAGACTGCATGAGAACTGCAGG  
GCTTGAGTGTGGGAGAGGTGAGTGGAATTTCCGGTGTAGCGGTGAAATGCGTAGATATCG  
GAAGGAACACCTGTGGCGAAAGCGGCTCACTGGACCATAACTGACGCTGAGGCACGAAAG  
CTAGGGGAGCAAACAGGATTAGAAACCCCGTAGTCC

>Otu7865

CCAGCCTACGGGGGGCAGCAGTGGGGAATATTGGACAATGGGGGAAACCCTGATCCAGCA  
ATGCCGCGTGCAAGATGAAGGCCTTAGGGTTGTAAACTGCTTTTATGTGTGACGAATATG  
ACGGTAGCATATGAATAAGGATCGGCTAACTCCGTGCCAGCAGCCGCGGTCATACGGAGG  
ATCCAAGCGTTATCCGGAATTACTGGGCGTAAAGAGTTGCGTAGGTGGCAGAGTAAGCAG  
GTAGTGAAAGAGTACGGCTCAACCGTATAGACATTATCTGAACTGCTCAGCTAGAGGACG  
AGAGAGGTAAGTGAATTTCTAGTGTAGGAGTGAATCCGTAGATATTAGAAGGAACACC

GATGGCGTAGGCAGGTTACTGGCTCGTTTCTGACACTGAGGCACGAAAAGCGTGGGGAGCA  
AACAGGATTAGATACCCGCGTAGTCC

>Otu7876

CCAGCCTACGGGAGGCACCAAGTGGGGAATATTGGACAATGGAGGAACTCTGACGCAGCG  
ACGCCGCGTGGGTGATGAAGGCCCTTCGGGTCGTAAAGCCCTGTCGGAAGGGACGAAAAAC  
AATTTGGCTAACATCCAAGTTGCTTGACGGTACCTTCAGAGGAAGCACCGGCTAACTACG  
TGCCAGTAGCCGCGGTAATACGTAGGGTGTAGCGTTGTTTCGGAACCATTTGGGCGTAAAG  
CGCGTGTAGGTGGTTAGGTAAGTCGGGTGTGAAATCCCTGGGCTCAACCGAGGAAGTGCA  
TCCGAAACTGCCTAGCTAGAGGACGGTAGAGGAAGGTGGAATTCCTAGTGTAGAGGTGAA  
ATTCGTAGATATTAGGAGGAATACCGGTGGCGAAGGCGGCCTTCTGGGCCGTTCTCTGACA  
CTGAGACGCGAAAGCGTGGGGAGCAAACAGGATTAGAAACCCGAGTAGTCC

>Otu7878

CCAGCCTATGGGGCGCTGCAGCCGAGAATATTCGACAATGGGCGAAAGCCTGATCGAGCG  
ATACCGCGTGGTTCGATGAAGTGCTTCGGCACGTAAAGACCTTTTATGGAGGAGGAAGTAA  
TTGACGTTACTCCATGAATAAGGGGCTCCTAACTCTGTGCCAGCAGGAGCGGTAATACAG  
AGGCCCCGAGCATTACCCGGAATTATTGGGCGTAAAGAGTGCGTAGGTGGTCATGTTAGT  
CGTTTGTATAAAACCCGAGCTCAACTCGGGATCTGCGAGCGAAACCGGCATGACTTGAGGG  
CGTGAGAGGTACATGGAAGTTCATGGTGTAGGGGTGAAATCCGTTGATATCATGGGGAACA  
CCGAAAGCGAAGGCAATGTACTGGCGCGTTCTTGACACTCAAGCACGAAAGCGTGGGTAG  
CGAACGGGATTAGAAACCCGAGTAGTCC

>Otu7882

CCAGCCTATGGGTCGCAGCAGTAGGGAATTTTGCACAATGGGCGCAAGCCTGATGCAGCA  
ATGCCGCGTGAGTGAAGAAGGCTCTTGGGTGTAAAGCTCTTTCGGCTGGAAAGAAGGGG  
TAGCCTGCGAACAGTTGGCTATCTTGACGGTACCAGAAGAAGAAGCACCTGCTAACTTCG  
TGCCAGCAGCAGCGGTAATACGAAGGGTGCAAGCGTTGTTTCGGAATTACTGGGCGTAAAG  
CGCGCGTAGGCGGGTCGGTAAGTTCGATTGTGAAAGCCAGGGCTTAACCTTGGAATCGCA  
GTGCAAACTGCCGATCTTGAATGTCTGAGAGGATGGCGGAATTCCCGGTGTAGTAGTGAA  
ATACGTAGATATCGGGAAGAACACCTGAGGCGAAGGCGGCTATCTGGCGGTACATTGACG  
CTGAGGCGCGAAAGCGTGGGGAGCAAACAGGATTAGATACCCCTGTAGTCC

>Otu7889

CCAGCCTATGGGTCGCAGCAGTCGAGAATCTTTCGGCAACGCACGAAAGTGTGACCGAGCG  
ACGCCGCGTGATTGATGAAGCCCTTCGGGGTGTAAGATCTTTTATGCATGAAGAAATTA  
TTGACATTAGTGCATGAATAAGGGGCTCCTAACTCTGTGCCAGCAGGAGCGGTAATACAG  
AGGCCCCGAGCGTTATCCGGAATTATTGGGCGTAAAGGGTGCGTAGGTGGTTTTATTAGT  
CGACTGTGAAAGATCCGGGCTCAACCCGGGGAACGCAATCGAAACGGTAAGACTTGAGTG  
TGTGAGAGGTGAACGGAAGTTCATGGAGTAGGGATGAAATCCGTTGATATCATGGGGAACA  
CCAAATGCGAAGGCAGTTCACTGGCACATTACTGACACTGAAGCACGAAAGCGTGGGTAG  
CGAATGGGATTAGATACCCCTGGTAGTCC

>Otu7895

CCAGCCTACGGGAGGCTGCAGTTGGGAATCTTGACAATGGGGGGAACCCCTGATGCAGCG  
ACGCCGCGTGGAGGACGAAGGGTCTAGGCCGTGTAAGCTCTTTTATCGGGAAAGACTTAG  
GACGGTACCCGATGAATAAGCACCGGCTAACTACGTGCCAGCAGCCGCGGTAAGACGTAG  
GGTGCAAGCGTTGTCCGGATTACTGGGCGTAAAGAGCGCGTAGGCGGTCTGTTAAGTGT  
AGAGTGAAATCTCCAGGGCTCAACCCGGAAGTGTCTGCATACTGGCAGACTGGAGGAT  
TGCAGAGGTATGTGGAATTCCCGGTGTAGCGGTGAAATGCGTTGATATCGGGAGGAACAC  
TCATGGCGAAGGCAGCATACTGGGCAATATCTGACGCTGAGGCGCGAAAGCGTGGGTAGC  
AAACAGGATTAGAGACCCCGTAGTCC

>Otu7896

CTAGCCTACGGGTGGCTGCAGTGGGGAATATTGGACAATGGGCGCAAGCCTGATCCAGCC  
ATGCCGCGTGGGTGATGAAGGCCCTAGGGTTGTAAAGCCCTTTCGACGGGGACGATAATG  
ACGGTACCTATAGAAGAAGCCCCGGCTAACTTCGTGCCAGCAGCCGCGGTAATACGAGGG  
GGGCAAGCGTTGTTTCGGAATTATTGGGCGTAAAGGGTGCGTAGGCGGTTTGACAAGTCTT  
ATGTGAAATCTATGGGCTCAACCCATAGTCTGCATGGGAACTGTGCGGCTTGAGTATGG  
GAGAGGTGAGTGGAATTTCCGGTGTAGCGGTGAAATGCGTAGATATCGGAAGGAACACCT  
GTGGCGAAAGCGGCTCACTGGACCATAACTGACGCTGATGCACGAAAGCTAGGGGAGCAA  
ACAGGATTAGAAACCCCTAGTAGTCC

>Otu7902

CCAGCCTATGGGGTGCAGCAGTAGGGAATCTTGCACAATGCGCGAAAGCGTGACGCAGCA

ACGCCGCGTGGGGGAAGAAGGCTTTCGGGTTGTAAACCCCTTTCAGTTGGGACGAAGCTC  
CGTCGGTTAATAGCCGGCTGGAGTGACGGTACCTTCACAAGAAGCACCGGCTAACTACGT  
GCCAGCAGCTGCGGTAATACGTAGGGTGCAAGCGTTGTCCGGAATCATTGGGCGTAAAGA  
GCGTGTAGGCGGTTTCGATCAGTCCGCTGTAAAAGTCCAGGGCTCAACCTGGGAGGCCGG  
TGGATACTGTCTGGGCTAGAGTCCGGAAGAGGCGAGTGGAATTCCTGGTGTAGCGGTGAAA  
TGCGCAGATATCAGGAGGAACACCAGCAGCGAAGGCGGTGGTCTGGGCCGACATTGACGC  
TGAGGAGCGAAAAGCGTGGGGAGCGAACAGGATTAGATAACCTTGTAGTCC

>Otu7908

CCAGCCTATGGGTCGCTGCAGTTGGGAATCTTGGGCAATGGGGGAAACCTGACCCAGCC  
ATGCCGCGTGAATGATGAAGCCCTTAGGGTTGTAAAGTCTTTTAGCAGGGACGATGATG  
ACGGTACCTGCAGAATAAGCTCCGGCTAACTTCGTGCCAGCAGCCGCGGTAATACGAAGG  
GAGCTAGCGTTGTTTCGGAATCACTGGGCGTAAAGCGTGCGCAGGCGGCTATTTAAGTCAG  
AGGTGAAATGCCAAGGCTCAACCTTGAACTGCCTTTGAACTGGGTAGCTAGAGTACTG  
GAGGGGTTAGGGGAATTTCTAATGTAGCGGTGAAATGCGTAGATATTAGAAGGAACACCA  
GCGGCGAAGGCGCCTAACTGGACAGTCACTGACGCTCATGCACGAAAGCGTGGGGATCAA  
ACAGGATTAGAAACCTTAGTAGTC

>Otu7913

CCAGCCTACGGGGCGCACCCAGTGGGGAATCTTGCGCAATGCGCGAAAGCGTGACGCAGCA  
ACGCCGCGTGGGGGAAGACGGCCTTCGGGTTGTAAACCCCTTTCAGTTGGGACGAAGCTT  
CGCCGGTGAATAGCCGGTTGGAGTGACGGTACCTTCAGAAGAAGCCCCGGCTAACTACGT  
GCCAGCAGCCGCGGTAATACGTAGGGAGCGAGCGTTGTCCGGAATCATTGGGCGTAAAGG  
GTTCTGAGGCGGGAATGCAAGTCAAGTGTGAAATCCCCAGGCTCAACCTGGGACGTGCAT  
TTGAGACTGTGTTTCTTGAGTTTCGGAGAGGGTGGTGGAATTGCTGGTGTAGGAGTGACA  
TCCGTAGAGATCAGCAGGAACACCGGAGGCGAAGGCGACCACCTGGCCGAATACTGACGC  
TGAGGAACGAAAGCGTGGGGAGCAAACAGGATTAGAAACCCGAGTAGTCC

>Otu7915

CCAGCCTACGGGTTGCTGCAGTCGAGAATTTTTCTCAATGGGCGAAAGCCTGAAGGAGCG  
ACGCCGCGTGGGGGATGAATGGCTTCGGCCCGTAAACCCCTGTCATTTGTGAACAAATTA  
ATCTACCCAACACGTGGATTATTGATAGTAACGGAAGAGGAAGGGACGGCTAACTCTGTG  
CCAGCAGCCGCGGTAATACAGAGGTCCCAAGCGTTGTTTCGGAATCACTGGGCGTAAAGGG  
TTCGTAGGCGGGAATGCAAGTCAAGTGTGAAATCCCCAGGCTCAACCTGGGACGTGCATT  
TGAGACTGTGTTTCTTGAGTTTCGGAGAGGGTGGTGGAATTGCTGGTGTAGGAGTGACAT  
CCGTAGAGATCAGCAGGAACACCGGAGGCGAAGGCGACCACCTGGCCGAATACTGACGCT  
GAGGAGCGAAAGCCAGGGGAGCGAACGGGATTAGAAACCCAGTAGTCC

>Otu7916

CCAGCCTACGGGGTGCTGCAGTCGAGAATTTTTTCACAGTGGACGAAAGTCTGATGGAGCG  
ACGCCGCGTGGAGGATGAAGTGCTTCGGCATGTAAACTCCTTTTGCCAGGGAAAAAGTTT  
ATTGATTGTACCTGGAGAATAAGAAGTTGCTAAACTCGTGCCAGCAGCAGCGGTAATACG  
AGTGCTTCGAGCGTTATCCGGAATCATTGGGCGTAAAGGGTGTGTAGGCGGCGATGTTAG  
TCTCCCGTAAAAATCTCCGGCTCAACCGGAGGCGCGCGGGAGAAACGGCATCGCTCGAGG  
GCAGGAGAGGTCTCTGGAATCATGGTGTAGCGGTGAAATGCGTTGATATCATGGGGAAC  
ACCAAAAGCGAAGGCAAGAGACTGGCCTGTTTCTGACGCTGAAACACGAAAGCGTGGGTC  
GCGAATGGGATTAGATAACCCCGGTAGTCC

>Otu7919

CCAGCCTACGGGAGGCAGCAGTGGGGAATATTGCGCAATGGGGGAAACCTGACGCAGCA  
ACGCCGCGTGAGTGATGAAGGTCCTCGGATCGTAAAGCTCTGTCGTTAGGAAAGATGTTT  
TATGTAGTTAATACCTATGTAAGCTGACGGTACCTAAAAAGGAAGCACCGGCTAACTCTG  
TGCCAGCAGCCGCGGTAATACAGAGGGTGCAAGCGTTGTTTCGGAATCATTGGGCGTAAAG  
GGCGCGTAGGCGGTCCAGCAAGTCAATGTGAAAGCCAGGGCTCAACCTTGGAAGTGCA  
TCCGAAACTGCCGACTCGAATCTCGGAGAGGGTGGTGGAATTCAGTGTAGAGGTGAA  
ATTCGTAGATATTGGGAGGAACACCGGTGGCGAAGGCGACCGCCTGGACGAAGATTGACG  
CTGAGGCGCGAGAGCGTGGGGAGCAAACAGGATTAGAAACCCGGGTAGTCC

>Otu7920

CCAGCCTATGGGGTGACAGCAGTGGGGAATATTGGACAATGGGGGAAACCTGATCCAGCG  
ACGCCGCGTGGGTGAAGAAGGTCTTCGGATTGTAAAGCCCTTTTATTGGGGAAGATAATG  
ACGGTACCCAATGAATAAGCACCGGCTAACTTCGTGCCAGCAGCCGCGGTAATACGAAGG  
GTGCTAGCGTTGTTTCGGAATGACTGGGCGTAAAGGGCGCGTAGGTGGTTTGATGCGTCTG  
ATGTGAAATACCTGGGCTTAACCTGGGAACTGCATCAGATACGGTCAGGCTTGAGTATGA



GAGGGGAAGATGGAATTGCAGGTGGAGAGGTGAAATTCGTAGATATCTGCAGGAACACCG  
GTGGCGAAGGCGATCTTCTGGCTCATTACTGACACTGAGGCGCGAAAGCGTGGGGAGCAA  
ACAGGATTAGATACCCCCGTAGTCC

>Otu7924

CCAGCCTATGGGTGGCTGCAGTGGGGAATATTGGACAATGGGCGAAAGCCTGATCCAGCA  
ATGCCGCGTGAGTGATGAAGGCCTTAGGGTTGTAAAGCTCTTTTGCAGGGATGATAATG  
ACAGTACCTGGAGAATAAGCTCCGGCTAACTCCGTGCCAGCAGCCGCGGTAATACGGAGG  
GAGCTAGCGTTGTTTCGGAATTACTGGGCGTAAAGCGCGCTAGGCGGTTTTTCAAGTCAG  
AGGTGAAAGCCCGGAGCTTAACTCCGGAACGCCTTTGAACTAGAGAACTAGAAGATGG  
GAGAGGTGAGTGGAATTCGAGTGTAGAGGTGAAATTCGTAGATATTTCGGAAGAACACCA  
GTGGCGAAGGCGGCTCACTGGACCATTCTTGACGCTGAGGTGCGAAAGCGTGGGGAGCAA  
ACAGGATTAGAAACCCTGGTAGTCC

>Otu7933

CCAGCCTATGGGGTGCTGCAGTGGGGAATATTGGACAATGGGCGCAAGCCTGATCCAGCG  
ATGCCGCGTGTTGAAGAAGGCCTGCGGGTTGTAAAGCACTTTTCAGTGGGGAGAACGAGG  
CGTAGTTTTAATAGACTATGCGGAAGATGTTACCCACAGAAGAAGCACCGGCTAACTCTGT  
GCCAGCAGCCGCGGTAATACAGAGGGTGCAAGCGTTAATCGAAATTACTGGGCGTAAAGG  
GTGCGTAGGTGGTTTGATAAGTTAGATGTGAAAGTCCTGGGCTCAACCTGGGGATTGCGT  
CTGATACTGTTAAGCTAGAGTTCTGTAGAGGAAGGTGGAATTTCCGGAGTAGCGGTGAAA  
TGCGTAGATATCGGAAGGAACATCGGTGGCGAAGGCGGCCTTCTGGACAGGAACCTGACAC  
TGAGGCACGAAAGCGTGGGGAGCAAACAGGATTAGAAACCCGGGTAGTCC

>Otu7934

CCAGCCTACGGGTGGCAGCAGTAGGGAATATTGCTCAATGGAGGAAGCTCTGATGCAGCG  
ACGCCGCGTGAGTGATGAAGGACTTCGGTTCGTAAAGCTCCGTTGCAAGGGAAAAATAAA  
TTGATGGTACTTTGCGAGAAAGGTCGGCTAACTTCGTGCCAGCAGCCGCGGTAAGACGA  
GGGACCCTAGCGTTGTTTCGGAATCATTGGGCGTAAAGCGGGTGTAGGTGGCCTTGTAAGT  
CAGGTGTGAAAGCCCAGGGCTTAACCTTGGAAGTGCATTTGATACTGCGAAGCTTGAGTG  
CTGGAGAGGTTACTAGAATTCCTGGTGTAGTGGTGAAATACGTAGATATCAGGAGGAATA  
CCGGAGGCGAAGGCGGGTAACTGGCCAGACACTGACACTCAGACCCGAAAGTGTGGGGAT  
CAAACAGGATTAGGTACCCCGGTAGTCC

>Otu7936

CCAGCCTATGGGTGCGCAGCAGTTGGGAATCTTGCAACAATGGGGGAAACTCTGATGCAGCG  
ACGCCGCGTGAGCGATGAAGCCCCTCGGGTGTAAGCTCTTTTCGGCAGGAACGATAATG  
ACGGTACCTGAAGAAGAAGCTGCGGCTAACTACGTGCCAGCAGCCGCGGTAATACGTAGG  
CAGCGAGCGTTGTTTCGGAATTACTGGGCGTAAAGAGTGTGTAGGCGGTGCTCTAAGTTTG  
GTGTGAAATCTCCCGGCTCAACTGGGAGGGTGCGCCGAAAACCTGGGGTGCTCGAGCGTGG  
GAGAGGAAAGCGGAATTCCTGGTGTAGCGGTGAAATGCGCAGATATCAGGAGGAACACCA  
ATGGCGAAGGCAGCCGCTGGGACGGTACTGACGCTGAGACGCGAAAGCGTGGGGAGCAA  
ACAGGATTAGAGACCCTAGTAGTCC

>Otu7942

CCAGCCTACGGGTGCGCAGCAGTCAGGAATATTGCGCAATGGAGGAAACTCTGACGCAGCG  
ACGCCGCGTGGGTGATGAAGGCCTTCGGGTGTAAGCCCTGTGCGAAGGGACGAAAAGC  
GGTATGGCTAATATCTTTACCGTTTGACGGTACCTTTAAAGGAAGCACCGGCTAACTACG  
TGCCAGCAGCCGCGGTAATACGTAGGGTGCAAGCGTTGTTTCGGAATCATTGGGCGTAAAG  
CGCGTGTAGGTGGTTATGTAAGTCGAGTGTGAAATCCCTGGGCTCAACCGAGGAAGTGCA  
TCCGAAACTACATAGCCAGAGGACGGTAGAGGAAGGTGGAATTCCTAGTGTAGAGGTGAA  
ATTCGTAGATATTAGGAGGAATACCGGTGGCGAAGGCGGCCTTCTGGGCCGGACCTGACA  
CTGAGACGCGAAAGCGTGGGTAGCAAACAGGATTAGAAACCCTCGTAGTCC

>Otu7948

CCAGCCTATGGGTGCGCAGCAGTGGGGAATATTGCGCAATGGGCGAAAGCCTGACGCAGCA  
ACGCCGCGTGAGTGAAGAAGGCCTTTAGGGTTGTAAACTCTTTTCGGTTGGGAAGAAGGAG  
TGTAAGTATGAATAGTATTATACTTTGATGGTACCAGCAGAAGAAGCACCGGCAAACCTCG  
TGCCAGCAGCCGCGGTAATACGAAGGGTGCAAGCGTTGTTTCGGAATTATTGGGCGTAAAG  
GGTTCGTAGGCGGTATCTTAAGTCAAGTGTAAAATATCTAAGCTTAACTTGAGGAGTCA  
TTTGAAACTGAGGTACTTGAGTTTCGGAGAGGGTGGTGGAATTGCTGGTGTAGGAGTGAT  
ATCCGTAGAGATCAGCAGGAACACCGGAGGCGAAAGCGGCCACCTGGCCGAAGACTGACG  
CTGAGGAACGAAAGCGTGGGTAGCAAACAGGATTAGAAACCCTGGTAGTCC

>Otu7949

CCAGCCTATGGGATGCTGCAGTGGGGAATATTGGACAATGGGCGCAAGCCTGACCCAGCC  
ATGCCGCGTGAAATGATGAAGGCCTTCGGGTGTAAAGTTCTTTTAGTGGAGAAAATAATG  
ATGGTATCCACAGAAAAAGCCCCGGCTAACTTCGTGCCAGCAGCCGCGGTAATACGAAGG  
GGGCTAGCGTTGTTTCGGAATTACTGGGCGTAAAGCGTTTGTAGGCGGTAGAACAAAGTCAG  
TGTTGAAAGCCCAGGGCTTAACCCTGGAATTGCCATTGAACTGTTCTGCTAGAGAGTGT  
TAGAGGAAAGTGGAATTCCTAGTGTAGGAGTGAAATCCGTAGAGATTAGGAGGAATATCG  
ATGGCGAAGGCAGCTTTCTGGGACATTTCTGACGCTGAGAAACGAAAGCGTGGGTAGCAA  
ACAGGATTAGAGACCCCAGTAGTCC

>Otu7955

CCAGCCTACGGCACCAGTCGAGAATTTTTTCACAATGGACGAAAGTCTGATGGAGCGACGC  
CGCGTGGAGGATGAAGGTTCTTGGATTGCAAACCTCCTGTCACTGCAGAACAAAGGGTGCGC  
ATGTTAATAGCAAGCGCATTTGATGGTATGCGGAGAGGAAGGGACGGCTAACTCTGTGCC  
AGCAGCCGCGGTAAGACAGAGGTCCCAGCGTTGTTTCGGATTCAATTGGGCGTAAAGGGTG  
TGTTAGGAGGTCTGGGTGAGTCAGGTGTGAAATCTCCAGCTTAACTGGGAACTGCGCTTG  
ATACTGCCCCGGCTAGAGGATCGGAGGGGGTATCGGAATTTATGGTGTAGCAGTGAAATGC  
GTAGATATCATAAGGAACACCGGTGGCGAAGGCGGATACCTGGAAGATTCTGACTCTGA  
AACACGAAAGCCAGGGGAGCAAACGGGATTAGAAACCCCTAGTAGTCC

>Otu7958

CCAGCCTATGGGGCGCAGCAGTGGGGAATTTTGGACAATGGGGGCAACCCTGATCCAGCC  
ATGCCGCGTGAGTGAAGAAGGCCTTCGGGTGTAAAGCTCTTTTGTCCGGGAAGAAAAGG  
CATCTCTTAATACGGGGTGTCTTTGACGGTACTGGAAGAATAAGCACCGGCTAACTACGT  
GCCAGCAGCCGCGGTAATACGTAGGGTGCAGCGTTAATCGGAATTACTGGGCGTAAAGC  
GTGCGCAGGCGGTTTCGTTAAGTCAGATGTGAAAGCCCCGGGCTCAACCTGGGAACGGCAT  
TTGAGACTGGCGAGCTGGAGTGTGGCAGAGGGGGGTGGAATTCACGTGTAGCAGTGAAA  
TGCGTAGAGATGTGGAGGAACACCGATGGCGAAGGCAGCCCCCTGGGCTGACACTGACGC  
TCAGGCACGAAAGCGTGGGGAGCAAACAGGATTAGATACCCCCGTAGTCC

>Otu7961

CAGCCTATGGGGGGCAGCAGTAACGAATATTCGCAATGGGCGAAAGCCTGACGGAGCAA  
TGCCGCGTGACAGGATGAAGCAGCTTCGCTGTGTAAACTGCTGTCAGGGGTACTAACACT  
GAAGAACTCCAGAGGAAGGGCCGGCTAAACTCGTGCCAGCAGCCGCGGTAAGACGAGTGG  
CCCAAGCGTTAGTCGGAATCACTGGGCTTAAAGGGTGCCTAGGCGGATCGGTAAGTGTCT  
TGTGAAAGCCCACGGCTCAACCGTGGAACCGCAGGGCATACTGCCGATCTTGAGGTAGGT  
AGAGGCCGGTAGAACGATCGGTGGAGCGGTGGAATGCGTAGATATCGATCGGAACGCCAA  
AGGTGAAGACAGCCGGCTGGGCCTTACCTGACGCTGAGGCACGAAAGCATGGGGATCAAA  
CAGGATTAGAAACCCCCGTAGTCC

>Otu7963

CCAGCCTATGGGTTGCAGCAGTAACGAATCTTCCGCAATGCTCGAAAGAGTGACGGAGCG  
ACGCCGCGTGTTGGGACGAAGTCCTTCGGGATGTAAACCACTGTCAGGGGCTACCAAGTTC  
TGAGGAGCCCCAGAGGAAGGCACGGCTAACTCTGTGCCAGCAGCCGCGGTAATACAGAGG  
TGCCAAGCGTTAGGCGGAATCACTGGGCTTAAAGCGTGTGTAGGCGGACGGGTAAGTACT  
TTGTGAAATCCCACGGCTCAACCGTGGAACCTGCTGGGTATACTGTCCGCTTTGAGCGACC  
TAGGGGCTATCGGAACAAACGGTGGAGCGGTGAAATGCGTAGATATCGTTTGAACGCCA  
ATGGTGAAAACAGATAGCTGGGGGTCTGCTGACGCTGAGACACGAAAGCCAGGGGAGCAA  
ACGGGATTAGAAACCCCTTGTAGTCC

>Otu7964

CCAGCCTACGGGGGGCTGCAGTGAGGAATTTTCTCAATGGGGGAAACCCTGAAGGAGCGA  
CGCCGCGTGAGGATGAAGGTCTTCGGATTGTAAACTCCTGTCATTTGGGAACAAGTTGC  
ATTGATTAACTGTCGATGCATTGATAGTACCAGAAGAGGAAGAGACGGCTAACTCTGTGC  
CAGCAGCCGCGGTAATACAGAGGTCTCAAGCGTTGTTTCGGATTCAATTGGGCGTAAAGGGT  
GCGTAGGTGGCGGGGTAAGTCAGGTGTGAAATCTCGAGGCTCAACCTCGAACTACACTT  
GATACTGCCTTGCTCGAGTACTGGAGAGGAGATTGGAATTTACGGTGTAGCAGTGAAATG  
CGTAGATATCGTGAGGAAGACCAAGTGGCGAAGGCGGATCTCTGGACAGTTCCTGACACTG  
AGGCACGAAGGCCAGGGGAGCAAACGGGATTAGATACCCAGTAGTCC

>Otu7967

CCAGCCTATGGGATGCACCAGTCGAGAATTTTTTCACAATGGGGGAAACCCTGATGGAGCG  
ACGCCGCGTGAGGATGAAGGCCTTCGGGTGCTAAACTCCTGTCACTGCAGAACAAAGGTT  
CAAGTAATTAACATGTTCTCGAGAGTGCTAGTATGCGGAGAGGAAGGGACGGCTAACTCT  
GTGCCAGCAGCCGCGGTAATACAGAGGTCCCAAGCGTTGTTTCGGATTCACTGGGCGTAAA

GGGTGTGTAGGAGGTTGTCTAAGTCGGGCGTGAAATCCCACCGCTTAACGGTGGAAGTGC  
GTTTCGATACTGGATAGCTGGAGGATCGGAGAGGAGAGCGGAATTCTCGGTGTAGCGGTGA  
AATGCGTAGATATCGAGAGGAACGCCAGCGGCGAAAGCGGCTCTCTGGACGATTCTCTGAC  
TCTGAAACACGAAAGCCAGGGGAGCGAACGGGATTAGATACCCCTGTAGTCC

>Otu7983

CCAGCCTATGGGGGGCAGCAGCTAAGAATATTCCGCAATGGACGAAAGCCTGATCCAGCC  
ATGCCGCGTGAGTGAAGAAGGCCTTCGGGTGTAAAGCTCTTTTCGGACAGAAAGAAATCG  
CACTGGTAAATAATCAGTGTGGATGACGGTACTGTAAGAAGAAGCACCGGCTAACTACGT  
GCCAGCAGCCGCGGTAATACGTAGGGTGCGAGCGTTAATCGGAATTACTGGGCGTAAAGC  
GTGCGCAGGCGGTTACATAAGACAGATGTGAAATCCCCGGGCTTAACCTGGGAACTGCGT  
TTGTGACTGTGTAACCGGAGTACGGCAGAGGGGGGTGGAATTCCTGGTGTAGCAGTGAAA  
TGCGTAGATATCAGGAGGAACACCGATGGCGAAGGCAGCCCCCTGGGCCTGTACTGACGC  
TCATGCACGAAAGCGTGGGGAGCAAACAGGATTAGATACCCCCGTAGTCC

>Otu7989

CCAGCCTATGGGACGCAGCAGTGGGGAATATTGGACAATGGGCGCAAGCCTGATCCAGCC  
ATGCCGCGTGAGTGAAGAAGGCCTTAGGGTTGTAAAGCTCTTTTGGCGGGGACGATAATG  
ACGGTACCCCGCAGAATAAGCCCCGGCTAACTTCGTGCCAGCAGCCGCGGTAATACGAAGG  
GGGCTAGCGTTGTTTCGGAATCACTGGGCGTAAAGCGCACGCAGGCGGATTGATAAGTCAG  
GGGTGAAATCCCCGGGCTCAACCTCGGAATTGCCTTTGATACTGTCTGTCTTTGAGTTCG  
GAAGAGGTTGGCGGAATTCTTAGTGTAGAGGTGAAATTCGTAGATATTAGGAAGAACACC  
AGTGGCGAAGGCGAGTCTCTGGACATTTCTTGACGCTGAGGCACGAAAGCCAGGGGAGCA  
AACAGGATTAGATACCCCGGTAGTCC

>Otu7991

CCAGCCTATGGGTGGCAGCAGTGGGGAATATTGGACAATGGGCGCAAGCCTGATCCAGCC  
ATGCCGCGTGAGTGATGAAGGCCTTAGGGTTGTAAAGCTCTTTTACCTGGGAAGATAATGA  
CGGTACCAGGAGAATAAGCCCCGGCTAACTTCGTGCCAGCAGCCGCGGTAATACGAAGGG  
GGCTAGCGTTGTTTCGGAATTTACTGGGCGTAAAGCGCACGTAGGCGGATCTTTAAGTCAGG  
GGTGAATCCCAAGGCTCAACCTTGGAAGTGCCTTTGATACTGGGGATCTCGAGTCCGGA  
AGAGGTTGGTGGAACTCCGAGTGTAGAGGTGAAATTCGTAGATATTTCGCAAGAACACCAG  
TGGCGAAGGCGGCTCACTGGCCCCGATACTGACGCTGAGGTGCGAAAGCGTGGGGAGCAAA  
CAGGATTAGATACCCCGGTAGTCC

>Otu8003

CCAGCCTATGGGGCGCACCCAGTCGAGAATCTTCCGCAATGGACGAAAGTCTGACGGAGCG  
ACGTTTCGTGAATGATGAAGCCCTTCGGGGTGTAAGTTCTTTTACTTGGGAGGAAGCCG  
CAAGGCAGACAGTACCAGGTGAATAAGAGGATCCTAATTCTGTGCCAGCAGGAGCGGTAA  
TACAGAATCCTCGAGCGTTACCCGGATTTATTGGGCGTAAAGGGTCCGTAGGTGGTCAAG  
TAAGTTGAAAGTTAAACTCATCGGCTTAACCTTTGAGGTGCTTTCAATACTGCTAGACT  
AGAGGATGTTAGGGGTTAACGGAACCGACGGAGTAGGGGTGAAATCCGTTGATATCGTCG  
GGAACACCAAAAAGCGAAGGCAGTTAACTAGGACAATCCTGACACTGAGGGACGAAAGCGT  
GGGGAGCAAAAAGGATTAGAAACCCTCGTAGTCC

>Otu8014

CCAGCCTATGGGATGCTGCAGTAAGGAATATTGGACAATGGGGGAAACCCTGACGCAGCA  
ACGCCGCGTGAGGATGAAGTCCCTTGGGACGTAAACTCCTTTTCGACCGGGACGATGATG  
ACGGTACCGGTGGAAGAAGCCCCGGCTAACTTCGTGCCAGCAGCCGCGGTAATACGAGGG  
GGGCGAGCGTTGTTTCGGAATTATTGGGCGTAAAGGGCGCGTAGGTGGCGCGGTAAGTCAC  
CTGTGAAACCTCCGGGCTCAACTCGGAGCCTGCAGGCGAAACTGCCGTGCTGGAGTATGG  
GAGAGGTGCGTGGAATTCCTGGTGTAGCGGTGAAATGCGTAGATATCGGGAGGAACACCT  
GTGGCGAAAGCGGCGCACTGGACCATAACTGACGCTGAGGCGCGGAAGCTAGGGGAGCAA  
ACAGGATTAGAAACCCAGTAGTCC

>Otu8024

CCAGCCTATGGGGGGCACCAGTGGGGAATATTGGACAATGGGCGCAAGCCTGATCCAGCC  
ATGCCGCGTGAGTGATGACGGCCTTAGGATTGTAAAGCCCTTTTCGACAGGGACGATGATG  
ACGGTACCTGTAGAAGAAGCCCCGGCTAACTTCGTGCCAGCAGCCGCGGTAATACGAAGG  
GGGCTAGCGTTGCTCGGAATTACTGGGCGTAAAGGGCGCGTAGGCGGTTCTGTAGTCAG  
GCGTGAAATTCCTGGGCTCAACCTGGGGGCTGCGCTTGATACGGCGGGACTAGAGGATGG  
AAGAGGCTCGTGGAATTCCTAGTGTAGAGGTGAAATTCGTAGATATTGGGAAGAACACCG  
GTGGCGAAGGCGGCGAGCTGGTCCATTACTGACGCTGAGGCGCGACAGCGTGGGGAGCAA  
ACAGGATTAGATACCCCTGGTAGTCC

>Otu8025

TCAGCCTATGGGAGGCACCAGTGGGGAATCTTGACACAATGGGGGAAACCCTGATGCAGCG  
ACGCCGCGTGAGCGATGAAGCCCTTCGGGGTGTAAGCTCTTTTCGTCAGGGAAGATAGTG  
ACGGTACCCGCGAGAATAAGCTCCGGCTAACTTCGTGCCAGCAGCCGCGGTAATACGAAGG  
GAGCTAGCGTTGTTTCGGAATTACTGGGCGTAAAGGGCGCGTAGGCCGTTTGACAAGTTGG  
ATGTGAAAGCCCAGGGCTCAACCCTGGAATTGCATTCAAGACTGTCTTACTTGAATTCGG  
TAGAGGTGAGTGGAATTCACAGTGTAGAGGTGAAATTCGTAGATATTGGGAAGAACACCG  
GTGGCGAAGGCGGCTCACTGGACCGACATTGACGCTGAGGCGCGAAAGCGTGGGGAGCAA  
ACAGGATTAGAAACCCCAGTAGTCC

>Otu8035

CCAGCCTATGGGTGCGCAGCAGTAGGGAATTTTCCACAATGGGCGAAAGCCTGATGGAGCA  
ACGCCGCGTGAGGGATGAAGGGTTTCGGCTTGTAACCTCTTTGGAGTGAGACGAACGAG  
CTTTTCGGTTAAACAATCGGAGGCAGTGACGGTATCACTAGAACAAGTCACGGCTAACTCTG  
TGCCAGCAGCCGCGGTAATACAGAGGTGACTAACGTTGTCCGGAATTATTGGGCGTAAAG  
GGCGCGTAGGCCGTTGGGTAAGTCAAATGTGAAATACCCGGGCTCAACCCGGGGGTTGCA  
TCTGATACTGCTCAGCTTGAGTACGGTAGAGGAAGGCGGAATTCACAGTGTAGCGGTGAA  
ATGCGTAGATATTGGGAGGAACACCGGTGGCGAAGGCGGCCTTCTGGACCGAAACTGACG  
CTGAAGCGCGAAAGCTAGGGGAGCAAACGGGATTAGAAACCCGCGTAGTCC

>Otu8039

CCAGCCTACGGGGGGCTCCAGTCGAGAATTTTCCACAATGGGCGAAAGCCTGATGGAGCG  
ACGCCGCGTGCGGGATGAAGGGCTTCGGCTCGTAAACCCCTGTCAGCTGTGAACAAACCC  
TGTGGGTGAATAGCTTACAGGTTGATAGTAGCAGCAGAGGAAGGGACGGCTAACTCTGTG  
CCAGCAGCCGCGGTAATACAGAGGTCCCAAGCGTTGTTTCGGATTCACTGGGCGTAAAGGG  
TGCGTAGGTGGCCAGGTAAGTCTAGCGTGAAATCTCCAAGCTCAACTTGGAAGTGCGCT  
GGATACTATCTGGCTAGAGTTCCGGAGGGGAGATTGGAATTCCTCGGTGTAGCAGTGAAAT  
GCGTAGATATCGAGAGGAACATCAGCGGCGAAGGCGAGTCTCTGGACGGATACTGACACT  
GAGGCACGAAAGCTAGGGGATCAAACGGGATTAGATACCCGAGTAGTCC

>Otu8047

CCAGCCTATGGGTGCTCAGTCGAGAATCTTCGGCAATGGGCGCAAGCCTGACCGAGCGAC  
GCCGCGTGCGGGATGAAGGCCCTCGGGTTGTAACCCGCTGTCAGAGGGGAGGAAATTCCA  
TGGGGTTCACCCCGTGGTTTGACCTATCTTCAGAGGAAGTACGGGCTAAGTTTCGTGCCAG  
CAGCCGCGGTAAGACGAACCGTACGAACGTTACTCGGAATCACTGGGCTTAAAGGGTGCG  
TAGGCCGTTCCGTAAGTCGGGTGTGAAATCCCTCAGCTTAACTGAGGAATAGCGCCCGAA  
ACTGTTCGGAAGTGGAGGAGACAGAGGTGGGCGGAAGTCTAGGGTGGAGCGGTGAAATGCGT  
TGATATCCTAAGGCACACCAAGTGGCGAAAGCGGCTCACTGGGTCTCTTCTGACGCTGAGG  
CACGAAAGCTAGGGGAGCAAACGGGATTAGATACCCGAGTAGTCC

>Otu8050

CCAGCCTACGGGTGGCACCAGTGGGGAATTTTGCGCAATGGGGGAAACCCTGACGCAGCA  
ACGCCGCGTGAGTGAGGAAGGATTTTCGGTCTGTAAAGCTCTGTGAGGTGGAAAAATGAG  
CCATGTCTAATAGGCATGGATAGTGATGGTACACCTGAAGGAAGCACCCGGCAAACCTTCGT  
GCCAGCAGCCGCGGTAATACGAAGGGTGCGAGCGTTGTTTCGGATTTATTGGGCGTAAAGC  
GCGCGCAGGCGGGATGGCAAGTCAGATGTGAAATGTGCGGGGCTCAACCTCAAATCTGCGT  
CTGAAACTACCGTTCTAGAATACTGGAGAGGGTAAGGGAATATCGCATGTAGGGGTAAAA  
TCCGTAGATATGCGATGGAACATCGGAGGCGAAGGCGCTTACCTGGACAGTTATTGACGC  
TGAGGCGCGAAAGCGTGGGGAGCAAACAGGATTAGAAACCCGCGTAGTCC

>Otu8055

CCAGCCTATGGGTGGCTGCAGTGGGGAATTTTGACACAATGGGGGCAACCCTGATCCAGCC  
ATGCCGCGTGAGTGAAGAAGGCCTTCGGGTGTAAAGCTCTTTTGTTCGGGAAGAAGGAG  
TGGAGGTTAATACCCCTTCGTGACAGACGGTACCGGAAGAATAAGCACCCGGCTAACTACGT  
GCCAGCAGCCGCGGTAATACGTAGGGTGCGAGCGTTAATCGGAATTACTGGGCGTAAAGC  
GTGCGCAGGCGGTTTCGTTAAGACAGCTGTGAAAGCCCCGGGCTTAACCTGGGAATGGCGG  
TTGTGACTGGCGAGCTAGAGTGTAGCAGAGGGGGGTGGAATTCACAGTGTAGCAGTGAAA  
TGCGTAGAGATGTGGAGGAACACCAATGGCGAAGGCAGCCCCCTGGGCTAACACTGACGC  
TCAGGCACGAAAGCGTGGGGAGCAAACAGGATTAGAAACCCCTGTAGTCC

>Otu8057

CCAGCCTACGGGGTGCACCAGTTGGGAATATTGCGCAATGGGCGAAAGCCTGACGCAGCA  
ACGCCGCGTGAGCGATGAAGGTCTTCGGATCGTGAAGCTCTTTTCGGCCGGGACGAAAACC  
CATCACTTCATACGTGGTGGCTTGACGGTACCGGAAGAAGAAGCACCCGGCTAACTCTGTG

CCAGCAGCCGCGGTAATACAGAGGGTGCAAGCGTTGTTTCGGATTTATTGGGCGTAAAGCG  
CGTGTAGGCGGTCTGTTATGTCTGGGTGTGAAAGCCCTCAGCTTAAGTGAAGTGCGCC  
CGAAACTGGCAGACTTGAGTACCGGAGAGGAGAGCGGAACACCCGGTGTAGAGGTGAAAT  
TCGTAGATATCGGGTAGAACACCAGTGGCGAAGGCGGCTCTCTGGACGGATACTGACGCT  
GAGACGCGAAAGCGTGGGGAGCAAACAGGATTAGAGACCCCAGTAGTCC

>Otu8058

CCAGCCTATGGGGCGCTGCAGTGGGGAATATTGCGCAATGGGCGAAAGCCTGACGCAGCA  
ACGCCGCGTGCGGGATGAAGGCCTTCGGGTGTAAACCGCTTTCAGTGGGGACGAAATTG  
ACGGTACCCACAGAAGAAGCCCCGGCCAACCTACGTGCCAGCAGCCGCGGTAACACGTAGG  
AGGCGAGCGTTGTCCGGATTTATTGGGCGTAAAGAGCTCGTAGGCGGCTCAGTAAGTCAG  
GTGTGAAAACCTCCAGGCTCAACCTGGAGACGCCACCTGATACTGCTGTGGCTAGAGTCCG  
GTAGGGGAGCATGGAATTTGTGGTGTAGCGGTGAAATGCGCAGATATCACAAGGAACACC  
AGTGGCGAAGGCGGTGCTCTGGGCCGGAACCTGACGCTGAGGAGCGAAAGCGTGGGGAGCA  
AACAGGATTAGAGACCCTAGTAGTCC

>Otu8060

CCAGCCTATGGGGTGCAGCAGCAAGGAATTTTCCGCAATGGGAGCAACCCTGACGGAGCA  
ACGCCGCGTGGGCGAGGACGCTTTTCGGAGTGTAAGCCCTTTTCAGACGGAAGAGAATG  
ACGGTACGTCTGGAAGAAGCATCGGCTAACTACGTGCCAGCAGCCGCGGTAATACGTAGG  
ATGCAAGCGTTGTCCGGATTTACTGGGCGTAAAGCGTGTGCAGGCGGAATGTTAGGTAGA  
TTGTGAAAGCCCCCGGCTTAACTGGGGAAGGTCAGTCTAAACCGGCAATCTGGAAGCAAG  
CAGAGGGGTGTGGAATTTCCCGGTGTAGTGGTGAAATGCGTAGAGATCGGGAGGAACACCA  
GAGGCGAAGGCGACACCCTGGGCTTGGCTTGACGCTCAGACACGAAGGCGTGGGGAGCGA  
ACAGGATTAGAGACCCTCGTAGTCC

>Otu8062

CCAGCCTATGGGTCGCACCAGTGGGGAATTTTACGCAATGGGGGAAACCCTGACGTAGCG  
ACACCGCGTGAGCGAAGAAGCCCTTTGGGGTGTAAGCTCTGTTCAGCTGGAACGAAAATA  
AATATGACGGTACCAGCAGAGGAAGCATCGGCTAACTACGTGCCAGCAGCCGCGGTAAGA  
CGTAGGATGCGAGCGTTGTCCGGATTCAATTGGGCGTAAAGAGTTTCGTAGGTGGTTTGTTA  
AGTCTGGTGTAAAGAATGGGGCCTAACCCAGAGATGCATTGGATACTGGCAAACCTTGA  
GTGCGTTAGAGGTGAGTGGAATTTCCAGTGTAAGCGGTGAAATGCATAGATATTGGGAAGA  
ACACCGGTGGCGTAAGCGACTCACTGGGACGTAACCTGACACTGAGGAACGAAAGCCGGGG  
GAGCGAATGGGATTAGAAACCCGGGTAGTCC

>Otu8065

CCAGCCTACGGGTTGCAGCAGTGGGGAATCTTGCGCAATGGGCGAAAGCCTGACGCAGCA  
ACGCCGCGTGCGGGATGACGGCCTTCGTGGTTGTAAACCGCTTTCAGCAGGGACGAAAAT  
GACGGTACCTGCAGAAGAAGCCCCGGCTAACTACGTGCCAGCAGCCGCGGTAATACGTAG  
GGGGCAAGCGTTGTCCGGATTCAATTGGGCGTAAAGAGCTCGTAGGCGGTTTCAGTAAGTCG  
GGTGTGAAAGCTCCGAGCTCAACTCGGAGAGGCCACCCGATACTGCTGTGACTTGAGTCC  
AGTAGAGGGGCGTGGAACCTCCTGGTGTAGCGGTGAAATGCGCAGATATCAGGAAGAACAC  
CTGCAGCGAAGGCGGCGCTCTGGGCTGGAACCTGACGCTGAGGAGCGAAAGCGTGGGTAGC  
AAACAGGATTAGAAACCCTAGTAGTCC

>Otu8071

CCAGCCTATGGGACGCTCCAGTCAAGAACCCTCCACAATGGACGAAAGTCTGATGGAGCG  
ACGCCGCGTGATGGATGAAGTGCTTCGGCATGTAAACATCTTTTGTACGCAAGAAAGTAA  
TTGATCAGCGTAAGAATAAGGAGTTGCTAAACTCGTGCCAGCAGCAGCGGTAATACGAGT  
GCTCCAAGCGTTATCCGGAATCATTGGGCGTAAAGGGTGTGTAGGCGGTTGTGTTAGTCT  
TCTGTTAAATTCTTCGGCTTAACCGGGGGCATGCAGGGGAAACGGCGCAACTAGAGGATG  
CGAGAGGTGAAAGGAACTCATGGAGTAGGGGTGAAATCCGTTGATATCATGGGGAAACACC  
AAATGCGAAGGCAATTCCTGCGCACTACTGACGCTGAGACGCGAAAGCGTGGGGAGCA  
AACAGGATTAGATACCCCAGTAGTCC

>Otu8084

CCAGCCTATGGGGTGCTGCAGTGGGGAATATTGGACAATGGGGGAAACCCTGATCCAGCA  
ATGCCGCGTGGGTGAAGAAGGTCTTCGGATTGTAAAGCCCTTTCGGCGGGGACGATGATG  
ACGGTACCCGCAGAAGAAGCCCCGGCTAACTTCGTGCCAGCAGCCGCGGTAATACGAAGG  
GGGCGAGCGTTGCTCGGAATGACTGGGCGTAAAGGGCGCGTAGGTGGCGTGACAGTCAG  
GCGTGAAATTCCTGGGCTCAACCTGGGGGCTGCGCTTGATACGTGCGTGCTAGAGTTCGG  
AAGAGGGTCGTGGAATTTCCAGTGTAGAGGTGAAATTCGTAGATATTGGGAAGAACACC  
GTGGCGAAGGCGGCGACCTGGTCCGGGACTGACGCTGAGGCGCGAAAGCGTGGGGAGCAA

ACAGGATTAGAGACCCTTGTAGTCC

>Otu8088

CCAGCCTATGGGGGGCAGCAGTGGGGAATATTGGACAATGGACGAAAGTCTGACGCAGCG  
ACGCCGCGTGGGTGATGAAGGCCTTCGGGTGTAAAGCCCTGTGGGGCGGGACGAATTAG  
TAGAAGCTAATACCTTCTATGATGACGGTACCGCCTTAGCAAGCACC GGCTAACTCTGTG  
CCAGCAGCCGCGGTAAGACAGAGGGTGCAAACGTTGTTTCGGGATTACTGGGCGTAAAGCG  
TGTGTAGGCGGCCAAGCAAGTCGGATGTGAAAGCCCCAGGCTTAACCTGGGAAGTGCACC  
CGATACTGCCTGGCTTGAGTATCGGAGAGGTTGGTGGAATTCTCGGTGTAGAGGTGAAAT  
TCGTAGATATCGAGAGGAACACCGGTGGCGAAGGCGGCCAACTGGACGAATACTGACGCT  
GAGACACGAAAGCGTGGGGAGCAAACAGGATTAGATACCCCAGTAGTCC

>Otu8089

CCAGCCTACGGGGGGCTGCAGTCGAGGATCTTCGGCAATGGGCGCAAGCCTGACCGAGCG  
ACGCCGCGTGTGCGATGAAGGCCTTCGGGTGTAAAGCACTGTGAGGGGGAGGAAAGCC  
CGTAAGGGTTTGACCTATCCCTGGAGGAAGCACGGGCTAAGTTCGTGCCAGCAGCCGCGG  
TAAGACGAACCGTGCAACGTTGTTTCGGAATCACTGGGCTTAAAGGGCGCGTAGGCGGGC  
AAGCAAGTCCGGGGTGAAAGCTTTCGGCTCAACCGGAAAAGTGCCTTGGATACTGCTTGT  
CTTGAGGGAGGTAGGGGCATGTGGAACCTTCGGGTGGAGCGGTGAAATGCGTTGATATCGG  
AAGGAACGCCGCTGGCGAAAGCGACGTGCTGGCCCTCTTCTGACGCTGAGGCGCGAAAGC  
CAGGGGTGCGAACGGGATTAGATACCCGTGTAGTCG

>Otu8090

CCAGCCTACGGGGTGCTCCAGTGGGGAATATTGCACAATGGACGAAAGTCTGATGCAGCC  
ATGCCGCGTGAGTGATGAAGGCCTTCGGGTGTAAAGCTCTTTTGGCGGGGACGATAATG  
ACGGTACCCGCGGAATAAGCCCCGGCTAACTTCGTGCCAGCAGCCGCGGTAATACGAAGG  
GGGCAAGCATTGTTTCGGAATTACTGGGCGTAAAGGGTGTGTAGGCGGATCGATCAGTCAG  
ATGTGAAAGCCCCAAGGCTCAACCTTGAATTCATTTGATACTGTCAGTCTGGAATTGTG  
GAGAGGAACGTGGAGTTCTCAGTGTAGAGGTGAAATTCGTAGATACTGAGAGGAACACCA  
GTGGCGTAGGCGACGTTCTGGCCAACAATTGACGCTGAGGCACGAAAGTGTGGGGAGCAA  
ACAGGATTAGAGACCCGTGTAGTCC

>Otu8093

CCAGCCTATGGGAGGCTGCAGTGGGGAATCTTGGACAATGGGGGCAACCCTGATCCAGCG  
ATGCCGCGTGGGTGAAGAAGGCCTTCGGGTGTAAAGCCCTTTAGGTTGGGACGAAGTGT  
GGGAGTTTAAGAGATACTCACATTGACGGTACCGACAGAATAAGCACCGGCAAACCTCTGT  
GCCAGCAGCCGCGGTAATACAGAGGGTGCGAGCGTTAATCGGAGTTACTGGGCGTAAAGG  
GCGCGTAGGCGGTTGTGTGAGTGTGATGTGAAAGCCCTGGGCTCAACCTAGGAAGTGCAT  
CGCAAACGACATGACTGGAGTATATGAGAGGGTGGCGGAATTTCCGGTGTAGCGGTGAAA  
TGCGTAGAGATCGGAAGGAACGTGCGATGGCGAAGGCAGCCACCTGGCATAATACTGACGC  
TGAGGCGCGAAAGCGTGGGGATCAAACAGGATTAGAAACCCGCGTAGTCC

>Otu8100

CCAGCTATGGGGGGCTGCAGTGGGGAATATTGGACAATGGGGGAAACCCTGATCCAGCGA  
CGCCGCGTGTGTGAAGAAGGCCTGCGGGTGTAAAGCACTTTTAGTGGGGATGAAATGTG  
CAGGGTTAATACCTCTGCATTTTGACCTAACCCACAGAAAAAGCACCGGCTAACTCTGTG  
CCAGCAGCCGCGGTAATACAGAGGGTGCAAGCGTTAATCGGAATTACTGGGCGTAAAGCG  
TGCGCAGATGGTTCGATAAGTCGGGTGTGAAAGCCCCGGGCTCAACCTGGGAATTGCATT  
CGAGACTGTGCGAGCTAGGGTGCGGAAGAGGGAAGCGGAATTTCCGGTGTAGCGGTGAAAT  
GCGTAGATATCGGAAGGAACACCAGTGGCGAAAGCGGCTTCCTGGTCCAGCACCGACATT  
CAGGCACGAAAGCGTGGGGAGCAAACAGGATTAGAGACCCTAGTAGTCC

>Otu8120

CCAGCCTACGGGACGCACCAGTCGAGGATCTTTCGCAATGGGCGCAAGCCTGACGAAGCG  
ACGCTGCGTGAGCGATGAAGGCCTTCGGGTGTAAAGCTCTTTCGCGCAAGAACAAGGAA  
AAGGTGTGAATAGCACTTTAACTTGAGGGTACTGCGTAAAGAAGCACCGGCTAACTCCGT  
GCCAGCAGCTGCGGTAATACGGAGGGTGCAAGCATTAATCGGAATAATTGGGCGTAAAGG  
GCGCGTAGGCGGGAAGGCAAGTCAGATGTGAAATTCGGGAGCTCAACTTCGGAGCTGCAT  
TTGAAACTATCTTTCTAGAGGGAGGACGGAGAAAACGGAATTCACGCTGTAGCGGTGAAA  
TGCGTAGATATGTGGAAGAACACCTGTGGCGAAAGCGGTTTCTAGTTTATATCTTGACG  
CTGAGGCGCGAGAGCAAGGGGAGCAAACAGGATTAGAAACCCCGGTAGTCC

>Otu8127

CCAGCCTACGGGTTGCAGCAGTAAGGAATATTGGTCAATGGACGCAAGTCTGAACCAGCC  
ATGCCGCGTGAAGGATGAAGGCCTCTGGGTGTAAACTTCTTTTATAGGGGACGAAAAA

AGGTCATTCTTGATCACTTGACGGTACCCTAGGAATAAGCACCGGCTAACTCCGTGCCAG  
CAGCCGCGGTAATACGGAGGGTGCAAGCGTTATCCGGATTTACTGGGTTTAAAGGGTGCG  
TAGGTGGGCAGGTAAGTCAGTGGTGAAATCTTCGAGCTTAACTCGGAACTGCCATTGAT  
ACTATCTGTCTCGAATTATCTGGGGGTGAGCGGAATATGTCATGTAGCGGTGAAATGCTT  
AGAGATGACATAGAACACCCATTGCGAAGGCAGCTCACTACCGATATATTGACACTGAGG  
CACGAAAGCGTGGGGATCAAACAGGATTAGAAACCCGAGTAGTCC

>Otu8132

CCAGCCTACGGGGTGCTCCAGTGGGGAATATTGCGCAATGGGGGAAACCCCTGACGCAGCG  
ACGCCGCGTGAGGATGAAGGCTTTAGGATTGTAACTTCTGTTAAGTGGGAAGAAATGT  
TGTGACCTAATACGTCACAAAGCTGACGGTACCCTAGAGAAAGCACCGGCTAACTTCGT  
GCCAGCAGCCGCGGTAATACGAAGGGTGCTAACGTTATTCGGAGTTATTGGGCGTAAAGA  
GCGTGTAGGCGGTCTGTAAAGTTGACTGTTAAATCTCCCGGCCTAACCGGGAATGCAG  
TCAAACTGGCAAGACTAGAGGGCAGGAGAGAGAAGTGAATTTCTCGGAGTAGCGGTAAA  
ATGCGTAGATCTCGAGAGGAACACCGATTGCGAAGGCAGCTTCTTGGCCTGTACCTGACG  
CTGAGACGCGAAAGCGTGGGGAGCAAACAGGATTAGAAACCCCTCGTAGTCC

>Otu8137

CCAGCCTATGGGTTGCAGCAGTAAGGAATATTGGACAATGGGCGCAAGCCTGATCCAGCC  
ATGCCGCGTGACAGGATGACAGCGTTATGCGTTGTAACTGCTTTTATACGGGAAAAAAT  
CTTATACGTGATATAGGACTGATGGTACCGTAAGAATAAGGACCGGCTAACTTCGTGCCA  
GCAGCCGCGGTAATACGAAGGGTCCGAGCGTTATCCGGATTTATTGGGTTTAAAGGGTGC  
GTAGGCGGCTTATTAAGTCAGTGGTGAAAGCCTGCAGCTTAACTGCAGAACTGCCATTGA  
TACTGATGAGCTTGAGTACATTTGAGGCGGGCGGAATGTGTCATGTAGCGGTGAAATGCT  
TAGATATGACACAGAACACCGATTGCGAAGGCAGCTCGCTAACTGTAAACCGACGCTGAG  
GCACTAAAGCGTGGGGAGCAAACAGGATTAGATACCCGTGTAGTCC

>Otu8143

CCAGCCTATGGGTGGCAGCAGTCGAGAATTTTTCTCAATGGGCGAAAGCCTGAAGGAGCG  
ACGCCGCGTGAGTGAAGAAGGCCTTCGGGTGTAAAGCTCTTTTGTGAGGGAAGAAACGG  
GTGGCTCTAATACAGCTATCTAATGACGGTACCTGAAGAATAAGCACCGGCTAACTACGT  
GCCAGCAGCCGCGGTAATACGTAGGGTGCAAGCGTTAATCGGAATTACTGGGCGTAAAGC  
GTGCGCAGGCGGTTTGCTAAGTCAGCTGTGAAATCCCCGGGCTTAACCTGGGAATGGCAG  
TTGAGACTGGCAGGCTAGAGTGTGTCAGAGGGGGGTAGAATTCACGTGTAGCAGTGAAA  
TGCGTAGAGATGTGGAGGAATACCGATTGCGAAGGCAGCCCCCTGGGATAACACTGACGC  
TCATGCACGAAAGCGTGGGGAGCAAACAGGATTAGATACCCGGGTAGTCC

>Otu8155

CCAGCCTATGGGTGGCTCCAGTCGAGAATTTTTTACAATGGGGGAAACCCCTGATGGAGCG  
ACGCCGCGTGGGGGATGAATGGCTTCGGCCCGTAAACCCCTGTCATTTGTGAACAAATTG  
CTTACCCAACACGTGAAGCATTGATTGTAAACGGAAGAGGAAGGGACGGCTAACTCTGTG  
CCAGCAGCCGCGGTAATACAGAGGTCCCAAGCGTTGTTTCGGATTCACTGGGCGTAAAGGG  
TGCGTAGGCGGTTTGACAAGTCTGATGTGAAATCCCGCAGCTTAACTGCGGAACGGCATT  
GGAACTGTCAGACTAGAGGAATGGAGGGGAGACTGGAATACTTGGTGTAGCAGTGAAAT  
GCGTAGATATCAAGTGGAACACCAGTGGCGAAGGCAGTCTCTGGACATTTCTCTGACGCT  
GAGGCACGAAAGCCAGGGGAGCAAACGGGATTAGAAACCCCTTGTAGTCC

>Otu8166

CCAGCCTACGGGACGCACCAGTCGAGAATCATTCGCAATGGGCGCAAGCCTGACGATGCG  
ACGCCGTGTGAGCGAAGAAGGCCTTCGGGTGCTAAAGCTCTTTCGCTTGGGAACAAGAGA  
GACCAACTAATAATTGGTTAATTTGAGTGTACCAGGTAAAGAAGCACCGGCTAACTCCGT  
GCCAGCAGCTGCGGTAATACGAGGGTGCAAGCATTAAATCGGATTTATTGGGCGTAAAGG  
GCGCGTAGGCGGAAAGGAAAGTCAGATGTGAAATCCCGGGGCTCAACCCCGGAACAGCAT  
TTGAACTCCCTATCTAGAGGATAGGCGGAGAAAACGGAATTCACAAAGTAGCGGTGAAA  
TGCGTAGATATGTGGAAGAACACCGGTGGCGAAGGCGGTTTTCTAGCTTATTCCTGACGC  
TGATGCGCGAAAGCAAGGGGATCAAACAGGATTAGAGACCCAGTAGTCC

>Otu8171

CCAGCCTACGGGAGGCAGCAGTGGGGAATATTGGACAATGGGGGCAACCCCTGATCCAGCA  
ATGCCGCGTGAGTGATGAAGGCCTTCGGGTGTAAAGCTCTTTCGCCCACGACGATGATG  
ACGGTAGTGGGAGAAGAAGCCCCGGCTAACTTCGTGCCAGCAGCCGCGGTAATACGAAGG  
GGGCTAGCGTTGTTTCGGAGTTACTGGGCGTAAAGGGCGCGTAGGCGGCTGTCCAAGTCGG  
GTGTGAAAGCCCAGGGCTCAACCCTGGAATAGCACTCGAGACTGGGCGGCTCGAGGACGG  
GAGAGGATGGTGGAATTCCTAGTGTAGAGGTGAAATTCGTAGATATTAGGAAGAACACCG

GTGGCGAAGGCGGCCATCTGGCTCGGTACTGACACTCAAGCGCGAAAGCGTGGGGAGCAA  
ACAGGATTAGAAACCCCCGTAGTCC  
>Otu8181  
CCAGCCTATGGGTGGCACCAGTGAGGAATATTGGTCAATGGACGCAAGTCTGAACCAGCC  
ATGCCGCGTGAAGGATGAAGGCCTTATGGGTGTAAACTCTTTTACGAGGGAAGAAACC  
CCGATTTCGATTCCGGTTGACGGTACCTTGGGAATAAGCACCGGCTAACTCCGTGCCAG  
CAGCCGCGGTAATACGGAGGGTGCAAGCGTTATCCGGATTACTGGGTTTAAAGGGTGTG  
TAGGCGGGTCATTAAGTCAGTGGTGAAATCTCCGGGCTCAACCCGAAACTGCCATTGAT  
ACTATTGGCCTTGAATGCTGTTGAGGGGGGCGGAATATGTCATGTAGCGGTGAAATGCAT  
AGGTATGACATAGAACACCGATAGCGAAGGCAGCCCTCCAAGCAGTTATTGACGCTGAGG  
CACGAAAGCGTGGGGATCAAACAGGATTAGATACCCGTGTAGTCC  
>Otu8182  
CCAGCCTACGGGGGGCAGCAGTCGAGAATTTTTTCACAATGGGGGAAACCCTGATGGAGCG  
ACGCCGCGTGGAGGATGAAGGTTCTTGGATTGTAAACTCCTGTCACTGCAGAACAAGGGT  
AGCCGGTTGAATATTCGGCTATTTGATGGTATGCGGAGAGGAAGGGGCGGCTAACTCTG  
TGCCAGCAGCCGCGGTAAGACAGAGGTCCCGAGCGTTGTTCCGATTTCATTGGGCGTAAAG  
GGTGTGTAGGAGGTCGGGTTAGTCAGGTGTGAAATCTCCAGCTTAACTGGGAAACTGCG  
CTTGATACTGCCCCGGCTAGAGGATCGGAGGGGTATCGGAATTTATGGTGTAGCAGTGAA  
ATGCGTAGATATCATAAGGAACACCGGTGGCGAAGGCGGATACCTGGAAGATTCTCTGACT  
CTGAAACACGAAAGCCAGGGGAGCAAACGGGATTAGAAACCCCAGTAGTCC  
>Otu8186  
CCAGCCTATGGGTTGCTGCAGTGGGGAATCTTGCGCAATGGGCGAAAGCCTGACGCAGCG  
ACGCCGCGTGAGTGACGAAGGCCTTCGGGTGTAAAGCTCTGTGGGGAGGGAAGAATAAG  
TCGACGTTAATAGCGTCGATGATGACGGTACCTCCTTAGCAAGCACCGGCTAACTCCGTG  
CCAGCAGCCGCGGTAAGACAGAGGGTGCGAACGTTGTTCCGAATTACTGGGCGTAAAGCG  
CGTGTAGGCTGCTTGGCAAGTCGGATGTGAAAGCCCAGGGCTCAACCCTGGAAGTGCAT  
CGATACTGCCGAGCTGGAGTCCCGGAGAGGAAGGCGGAATTCTCGGTGTAGAGGTGAAAT  
TCGTAGATATCGAGAGGAACACCTGTGGCGAAGGCGGCCCTTCTGGACGGTGAATGACGCT  
GAGACGCGAAAGCGTGGGGAGCAAACAGGATTAGATACCCGTGTAGTCC  
>Otu8187  
CCAGCTATGGGTGGCAGCAGTGGGGAATTTTGGACAATGGGGGCAACCCTGATCCAGCAA  
TGCCGCGTGTGTGAAGAAGGCCTTCGGGTGTAAAGCACTTTTGTGAGGAACGAAACGGT  
TCGGGCTAATACCCTGGGCTAATGACGGTACCTGAAGAATAAGCACCGGCTAACTACGTG  
CCAGCAGCCGCGGTAATACGTAGGGTGCGAGCGTTAATCGGAATTACTGGGCGTAAAGCG  
TGCGCAGGCGGTTGTGTAAGACAGATGTGCAATGCCCGGGCTTAACCTGGGAACTGCATT  
TGTGACTGCACGGCTAGAGTTTGGCAGAGGGGGGTAGAATTCCACGTGTAGCAGTGAAAT  
GCGTAGATATGTGGAGGAATACCGATGGCGAAGGCAGCCCCCTGGGTCAAACCTGACGCT  
CATGCACGAAAGCGTGGGGAGCAAACAGGATTAGATACCCCGGTAGTCC  
>Otu8198  
CCAGCCTATGGGGGGCACCAGTAAGGAATTTTGGGCAATGAGGTAACCCTTGACCCGGCG  
AGAGCGCGTGATGATGAATGCGGTGAGTTTCTGTAAAGTGCTTTTAAGGAATCAAGAT  
ACTGACTGTAGTTCTATAAGAAGCACCGGCTAACTCCGTGCCAGCAGCTGCGGTAAGAC  
GGAGGGTGCGGGCCTTATTCATTATGATTGGGTGTAAAGGGTGGGTAGGTGGCTACTAAC  
GGCGTTGATCGAAACTGCAGAGAGTTCTCTGTGCTATTTTTCAGTGGACACGAAGGTACGCT  
AGAGTTGGGTATTGATCGCGGCAAAATCTCATGGAGAGGTTGAATCTTAGGAGATGAGAC  
TGAACATCGGCAAGCGAAGGCGCGGTTTTGTCTCAACTGACGCTGAGTCACGGAAGCCA  
GGGAGCAAACCTGGATTAGATACCCCTGTAGTCC  
>Otu8203  
CCAGCCTATGGGGTGCAACCAGTGGGGAATATTGGACAATGGGCGAAAGCCTGATCCAGCA  
ATGCCGCGTGAGTGAGGAAGGCCTTAGGGTTGTAAAGCTCTTTCGGCGGGGACGATGATG  
ACGGTACCCGCGAGAAGAAGCCCCGGCTAACTTCGCGCCAGCAGCCGCGGTAATACGAAGG  
GGGCTAGCGTTGCTCGGAATGACTGGGCGTAAAGGGCGCGTAGGCGGTTTGTACAGTCAG  
ATGTGAAATTCCCGGGCTCAACCTGGGGACTGCATTTGATACGTGCAGGCTTGAGTTCGG  
AAGAGGGTCGTGGAATTCACAGTGTAGAGGTGAAATTCGTAGATATTGGGAAGAACACCG  
GTGGCGAAGGCGGCGACCTGGTCCGAGACTGACGCTGAGGCGCGAAAGCGTGGGGAGCAA  
ACAGGATTAGATACCCCTCGTAGTCC  
>Otu8207  
CCAGCCTACGGGTCGCTGCAGTCGAGGATCTTCGGCAATGAGCGCAAGCTTGACCGAGCG



ACGCCGCGTGTGCGACGAAGGCCTTCGGGTTGTAACTCCTGTGCGAGGGGGAGGAAGGGG  
TGACCTTGACCGATCCCTGGAGGAAGCACGGGCTAAGTTCGTGCCAGCAGCCGCGGTAAG  
ACGAACCGTGCTAACGTTATTTCGGAATCACTGGGCTTAAAGCGCGTGTAGGCGGATGGGA  
ACGTCGGTTGTTGAAAGCCCCGGCTTAACCGGGGAACTGGCGCCGAAACGCCCCGTCTG  
GAGGGACGTAGGGGGACCTGGAACCTCCGGTGGAGCGGTGAAATGCGTTGAGATCGGAAG  
GAACGCCCGTGGCGAAAGCGAGGTCCTGGACGTTTTCTGACGCTGAGACGCGAAAGCTAG  
GGGAGCGAACGGGATTAGATAACCCCGTAGTCC

>Otu8212

CCAGCCTATGGGATGCTGCAGTGGGGAATATTGGACAATGGGCGAAAGCCTGATCCAGCC  
ATGCCGCGTGAGTGATGAAGGCCTTAGGGTTGTAAAGCTCTTTTGCCCGGGAAGATAATG  
ACGGTAACGTGAGAAGAAGCCCCGGCTAACTTCGTGCCAGCAGCCGCGGTAATACGAAGG  
GGGCAAGCGTTGTTTCGGAATTACTGGGCGTAAAGGGCGCGTAGGCGGTGCACTAAGTCAG  
GCGTGAAAGCCCTGGGCTCAACCCGGGAATTGCGCTTGATACTGGTGCCTCGAATCCAG  
GAGAGGTTGGTGGAATTCCAGTGATAGAGGTGAAATTCGTAGAGATTGGGAAGAACACCG  
GTGGCGAAGGCGGCCAACTGGACTGGTATTGACGCTGAGGTGCGAAAGCGTGGGGAGCAA  
ACAGGATTAGAGACCCCTGTAGTCC

>Otu8226

CCAGCCTACGGGTTGCTCCAGTCGAGAATCTTCGGCAATGGGCGCAAGCCTGACCGAGCG  
ACGCCGCGTGAGGATGAAGGCCTTCGGGTTGTAACTCCTGTGCGAGGGGGAGGAAGGTC  
GGGTAACCGGCTTGACCGATCCCTGGAGGAAGCACGGGCTAAGTTCGTGCCAGCAGCCGC  
GGTAAGACGAACCGTGCGAACGTTATTTCGGAATCACTGGGCTTAAAGCGCGTGTAGGCGG  
ATAGGGACGTCGGTCGCTGAAATCCCCCGGCTCAACCGGGGAACGGGCACCGAAACGCCC  
TGTCTGGAGGGACGTAGGGGGACCTGGAACATCCGGTGGAGCGGTGAAATGCGTTGAGAT  
CGGATGAAACGCCCCTGGCGAAAGCGAGGTCTTGACGCTTCTGACGCTGAGACGCGAA  
AGCTAGGGTAGCGAACGGGATTAGAAACCCCTCGTAGTCC

>Otu8232

CAGCCTACGGGTGGCTGCAGTCGAGAATTTTTCTCAATGGGCGAAAGCCTGAAGGAGCGA  
CGCCGCGTGGGGGATGAATGGCTTCGGCCCCGTAAACCCCTGTCATTTGTGAACAAATTGC  
TTCACCCAACACGTGAAGCATTGATAGTAACGGAAGAGGAAGGGACGGCTAACTCTGTGC  
CAGCAGCCGCGGTAATACAGAGGTCCCAAGCGTTGTTTCGGATTCACTGGGCGTAAAGGGT  
GCGTAGGCGGTTCGGGTAAGTCTGACGTGAAATCTCCGGGCCTAACCCGAAACTGCGTCG  
GATACTATCCGGCTAGAGGATTGGAAGGGAGACTGGAATACTTGGTGTAGCGGTGAAATG  
CGCAGATATCAGGAGGAACACCAATGGCGAAGGCAGCTCGCTGGGACGTGACTGACGCTG  
AGACGCGAAAGCGTGGGGAGCAAACAGGATTAGAAACCCCACTAGTCC

>Otu8233

CCAGCCTACGGGGCGCTGCAGTAAGGAATATTGGTCAATGGGCGAAAGCCTGAACCAGCC  
ATGCCGCGTGAGGATGAAGGCCCTCTGGGTTGTAACTTCTTTTATTTGGGAAGAAATC  
CATTTTTTTCTAAGGTGGTTGACGGTACCAGATGAATAAGCACCGGCTAACTCCGTGCCAG  
CAGCCGCGGTAATACGGAGGGTGCAAGCGTTATCCGGATTCACTGGGTTTAAAGGATGCG  
TAGGCGGGCAGGTAAGTCAGTGGTGAAATCTCCGGGCTTAACCCGAAACTGCCGTTGAT  
ACTATCTGTCTTGAATGTGCTGGAGGTGAGCGGAATATGTCATGTAGCGGTGAAATGCTT  
AGATATGACATAGAGCACCAATTGCGAAGGCAGCTCACTACACGATGATTGACGCTGAGG  
GACGAAAGCTAGGGGAGCAAACAGGATTAGAGACCCGAGTAGTCC

>Otu8238

CCAGCCTACGGGACGCAGCAGTGGGGAATATTGGACAATGGGGGAAACCCTGATCCAGCG  
ACGCCGCGTGTGTGAAGAAGGCCTGCGGGTTGTAAAGCACTTTTAGTGGGGACAAAAAGC  
TACGGATTAATACTCTGTGGTCTTGATTTAACCCAAAGAAAAAGCACCGGCTAACTCTGT  
GCCAGCAGCCGCGGTAATACAGAGGGTGCGAGCGTTAATCGGAATTACTGGGCGTAAAGC  
GCGCGTAGACGGTTTTGCAAGTCTGATGTGAAAGCCCCGGGCTCAACCTGGGAACGGCAT  
TGGAGACTGCAAGACTAGAGTGCGTCAGAGGGGGGTAGAATTCGCGGTGTAGCAGTGAAA  
TGCGTAGAGATGCGGAGGAATGCCGATGGCGAAGGCAGCCCCCTGGGATGACACTGACGC  
TCATGCACGAAAGCGTGGGGAGCAAACAGGATTAGATAACCCGTGTAGTCC

>Otu8249

CCAGCCTACGGGGCGCTCCAGTGGGGAATATTGGACAATGGGCGCAAGCCTGATCCAGCC  
ATGCCGCGTGAGTGATGAAGGCCTTAGAGTTGTAAAGCTCTTTTGGCGGGGAAGATAATG  
ACGGTACCCGCGAGAATAAGCCCCGGCTAACTTCGTGCCAGCAGCCGCGGTAATACGAAGG  
GGGCAAGCATTGTTTCGGAATTACTGGGCGTAAAGGGTGGTAGGCGGATTGATCAGTCAG  
GTGTGAAAGCCCAAGGCTCAACCTTGAATTCGATTGATACTATCAGTCTGGAATATTG

GAGAGGAACGTGGAATTCTCAGTGTAGAGGTGAAATTCGTAGATATTGAGAGGAACACCA  
GTGGCGTAGGCGACGTTCTGGCCCATTACTGACGCTGAGGCGCGAAAGCGTGGGGAGCAA  
ACAGGATTAGAAACCCCCGTAGTCC

>Otu8263

GGACTACTGGGGTATCTAATCCTGTTTGCTCCCCTAGCTTTCGTGCCTCAGCGTCAGTTA  
TGGTCCAGTGAGCCGCTTTCGCCACAGGTGTTCTTCCGATATCTACGCATTTACCCGCT  
ACACCGGAAATTCACCTCACCTCTCCCATACTCAAGCCCGGCAGTTTCTCATGCAGACTA  
TGGGTTGAGCCCATAGATTTACATAAGACTTACAAAACCGCCTACGCACCCTTTACGCC  
CAATAATTCCGAACAACGCTCGCCCCCTCGTATTACCGCGGCTGCTGGCACGAAGTTAG  
CCGGGGCTTCTTCTTCCGGTACCGTCATTATCGTCCCGATCGAAAGGAGTTTACGTCCCG  
AAGGACTTCATCCTCCACGCGGCGTTGCTGCGTCAGGGTTTCCCCCATTGCGCAAAATTC  
CCCCTGCTGCCTCCCATAGGCTGG

>Otu8265

CCAGCCTATGGGAGGCTCCAGGTTTCGTGCGAACTGGACCGTATAGGCAACGCCGTTTTG  
CCCGGCGAACTCGAACTGAAAACCGTTGCTGTTTACCATCGGAGATTGCAGTTGCGGCAT  
GTTGATCGGCGAAACGAAAACATTGGTGCCACCGAGACCCCGCGGGATTGTCATCGTT  
ATAAACAGTGTAAGTGACCGTGATTACCAGGAGTGAAATAGAAGTGATCGAGGACGAC  
AGTGTGTTGAGGCTGACTCGCCGTCACCGAACTCCAGTTGATCGCGGAGGCGCGGCCGCT  
GAAGGAGCCGGTTAAAAAGGCCGAGCGATTGACCGGAATATTGGTTTGGTTGCAAACGAG  
GCTAACCGTGAGCGGCCCCACGAGATTAGATACCCTAGTAGTCC

>Otu8275

CCAGCCTACGGGTGGCACCAGTGGGGAATCTTGCGCAATGGACGAAAGTCTGACGCAGCC  
ACGCCGCGTGAGTGAAGAAGGCCTTCGGGTGTAAAGCTCTGTGCGCGGGACGAAAAGT  
CATATGGCTCATACCCATGTGACCTGACGGTACCGCGAAAGGAAGCACCGGCTAACTCTG  
TGCCAGCAGCCGCGGTAATACAGAGGGTGCAAGCGTTGCTCGGAATTATTGGGCGTAAAG  
GGTAGGTAGGTGGTCTCATTTGTGCGGGGTGAAAGCCTTGGGCTTAACCCAAGAAGTGCC  
TTCGAAACGGTGAGACTAGAGTTCTGGAGAGGGTTCGTGGAATTCCCGGTGTAGCGGTGAA  
ATGCGTAGAGATCGGGAGGAACACCAGAGGGCGAAGGCGGCGACCTGGACAGATACTGACA  
CTCAACTACGAAAGCGTGCGGGAGCAAACAGGATTAGAAACCCGTGTAGTCC

>Otu8277

AGCCTATGGGTGGCAGCAGTCGAGAATCATTCGCAATGGGCGAAAGCCTGACGATGCGAC  
GCCGTGTGAGCGAAGAAGGCCTTCGGGTGTAAAGCTCTTTCGCTTGGGAACAAGAAAAG  
CTGACTAATAATCAGCAGATTTGAGCGTACCAGGTAAAGAAGCACCGGCTAACTCCGTGC  
CAGCAGCTGCGGTAATACGGAGGGTGCAAGCATTAATCGGATTTATTGGGCGTAAAGGGC  
GCGTAGGCGGGGATATAAGTCAGACGTGAAATCCCGAGGCTCAACCTCGGAAGTGCATTT  
GAACTATATTTCTAGAGGGTAGGAGGAGAAAACGGAATTCACAAGTAGCGGTGAAATG  
CGTAGATATGTGGAAGAACACCGGTGGCGAAGGCGGTTTTCTATCTTACTCCTGACGCTG  
ATGCGCGAAAGCAAGGGGATCAAACAGGATTAGATACCCCTGTAGTCC

>Otu8279

CCAGCCTACGGGAGGCAGCAGTGGGGAATCTTGGAATGCGCGAAAGCGTGACCGGGCG  
AGAATTCATACGTGAAGAAGACGTATTGTGCTAAAGCGTAGTTTATGCAAGCGAGGTATA  
ACAAAGGACATACTCGGTAGTGTAAGTACTGGTTAATTCTGTGCCAGCAGCCGCGGTAA  
GACAGAAAGTGCAGGCGTTATTCGGATTTACTGGGCGTTAAGGGTATGTAGGCAGCTAGA  
TGTAAGTAAGAAGGAAAGGCTCAGGAATCCGCTGAGAAGTATTCTTAAAGATTATTAAGC  
TAGAGTTTATGCGGAGTTGGGAGAATTAACGAAGTAATGGAGTTAAATCCTGCGATATTG  
TTAGGAAGGCCAAAGGCGGAAGCACCTTTCTGGCATAAACTGACGCTGAGGTACGAAAGA  
TTGGGGATCAAAGCGGATTAGAGACCCGAGTAGTCC

>Otu8286

CCAGCCTATGGGTGGCTGCAGTGGGGAATATTGGACAATGGGGGCAACCCTGATCCAGCA  
ATGCCGCGTGTGTGAAGACGGCCTTCGGGTGTAAAGCACTTTAGTTGGGGAGGAAGGTT  
AGTAGTTTAAAGAGATGACTAATTTGACTGTACCCAAAGAATAAGCACCGGCTAACTCTGT  
GCCAGCAGCCGCGGTAATACAGAGGGTGCGAGCGTTAATCGGAATTACTGGGCGTAAAGG  
GCGCGTAGGCGGTATATTAAGTTGGATGTGAAATCCCTGGGCTTAACCTAGGAACTGCAT  
CTAATACTGGTATGCTAGAGTGCTGTAGAGGATAGCGGAATTTCCGGTGTAGCGGTGAAA  
TGCGTAGATATCGGAAGGAACACCAAGTGGCGAAGGCGGCTATCTGGACAGACACTGACGC  
TGAGGCGCGAGAGCGTGCGGGAGCAAACAGGATTAGAAACCCCTGGTAGTCC

>Otu8289

CCAGCCTACGGGAGGCACCAGTGGGGAATCTTGCGCAATGGACGAAAGTCTGACGCAGCC

ACGCCGCGTGAGTGAAGAAGGCCTTCGGGTTGTAAAGCTCTGTCTGGGCGGGACGAAAAATA  
CTTCGGGCTAATACCTCGAGGAGTTGACGGTACCGCCAAAGGAAGCACCGGCTAACTTCG  
TGCCAGCAGCCGCGGTAATACGAGGGGTGCAAGCGTTGCTCGGAATTATTGGGCGTAAAG  
GGCAGGTAGGTGGTCTGATTTGTCTAGGGTGAAAGCCTTGAGCTCAACTCAAGAAGTGCC  
CTAGAAACGGTCAGACTGGAGTCTCGGAGAGGGTCTGTGAATTCCCAGGTGTAGCGGTGAA  
ATGCGTAGAGATCGGGAGGAACACCAGCGGCGAAGGCGGCGACCTGGACGAGTACTGACA  
CTCAACTGCGAAAGCGTGGGGAGCAAACAGGATTAGAAACCCCCGTAGTCC

>Otu8310

CCAGCCTATGGGGGGCTGCAGTGGGGAATATTGGACAATGGGGGAAACCCTGATCCAGCC  
ATGCCGCGTGAATGATGAAGGCCTTCGGGTTGTAAAGTTCTTTTGACAGGGAAGATGATG  
ACTGTACCTGTAGAATAAGCTCCGGCTAACTTCGTGCCAGCAGCCGCGGTAATACGAAGG  
GAGCTAGCGTTGTTTCGAATTACTGGGCGTAAAGGGCGCGTAGGCGGTTTAGTAAGTTGG  
AAGTGAAATCCCTGGGCTCAACCCGGGAATTGCTTTCAAGACTATTAGACTTGAATTCGG  
TAGAGGTTGGTAGAATTTCCAGTGTAGAGGTGAAATTCGTAGATATTGGAAAGAATACCG  
GTGGCGAAGGCGGCAAACCTGGGCATCATCTGACGCTGAGGCGCGAAAGCGTGGGTAGCAA  
ACAGGATTAGAGACCCGCGTAGTCC

>Otu8319

CCAGCCTATGGGAGGCTGCAGTGGGAATATTGCACAATGGGGGAAACCCTGATCCAGCAA  
TGCCGCGTGTGTGAAGAAGGCCTTCGGGTTGTAAAGCACTTTTGTACAGGAACGAAACGGT  
CGGGGCTAATATCCCTGGCTAATGACGGTACCTGAAGAATAAGCACCGGCTAACTACGTG  
CCAGCAGCCGCGGTAATACGTAGGGTGCAAGCGTTAATCGGAATTACTGGGCGTAAAGCG  
TGCGCAGGCGGTTATACAAGACAGATGTGAAATCCCCGGGCTCAACCTGGGAACCTGCATT  
TGTGACTGTATGGCTAGAATCTGGCAGAGGGGGGTAGAATTCACGTGTAGCAGTGAAAT  
GCGTAGATATGTGGAGGAATACCGATGGCGAAGGCAGCCCCCTGGGCTAAGATTGACGCT  
CATGCACGAAAGCGTGGGGAGCAAACAGGATTAGATACCCTAGTAGTCC

>Otu8337

CCAGCCTACGGGTTGCAGCAGTCGAGAATATTTCGACAATGGGCGAAAGCCTAATCGAGCG  
ACACCGCGTGTAGGATGAAGGCCCTTCGGGTCGTGAACTACGGTAGCTAGGGAGGAATGCA  
AATGACTGTACCTAGCGGAAAAGAGGTGGGTAACCTACGTGCCAGCACCAGCGGTAATACGT  
AGACCTCAAGCGTTATCCGGATTTATTGGGCGTAAAGAGCATGTAGGAGGTTTCGCGCGT  
CTTTTGTTAAAGCCCACCGCCCAACGGTGGAAGTGCAGGAGATACGGCGGGACTAGAGGA  
GGTTAGAGGTGCATGGAACCTACGGTGTAGGGGTGAAATCCGTTGATATCGTGGGGAGCA  
CCAAAGGCGAAGGCAGTGCCTGGGACCTTCCTGACTCTGAGATGCGAAAGCGTGGGGAG  
CAAAAAGGATTAGATACCCGAGTAGTCC

>Otu8344

CCAGCCTACGGGGGGCAGCAGTGGGAAATTTTGGACAATGGGGGCAACCCTGATCCAGCA  
ATGCCGCGTGTGTGAAGAAGGCCTTCGGGTTGTAAAGCACTTTTGTACAGGAAAGAAATTG  
TCCGGGCTAATATCCTGGATAGATGACGGTACCTGAAGAATAAGCACCGGCTAACTACGT  
GCCAGCAGCCGCGGTAATACGTAGGGTGCAAGCGTTAATCGGAATTACTGGGCGTAAAGC  
GTGCGCAGGCGGTTTTGTAAAGTCTGATGTGAAATCCCCGGGCTCAACCTGGGAATGGCAT  
TGGAGACTGCAAGGCTAGAATCTGGCAGAGGGGGGTAGAATTCACGTGTAGCAGTGAAA  
TGCGTAGAGATGTGGAGGAATACCGATGGCGAAGGCAGCCCCCTGGGCTAAGATTGACGC  
TCATGCACGAAAGCGTGGGGAGCAAACAGGATTAGAAACCCTCGTAGTCC

>Otu8350

GGACTACGAGGGTATCTAATCCTGTTTGCTCCCCACGCTTTCGCGTCTCAGCGTCAGTAC  
CGTCCCAGCGAGCTGCCTTCGCCATTGGTGTTCCCTCCTGATATCTGCGCATTTTCACCGCT  
ACACCAGGAATCCACTCGCCTCTTCCGGACTCTAGTCCGACAGTATCCACCGGCATCCC  
AGGGTTGAGCCCTGGACTTTCACAGCGGACTGATCGGACCGCCTACACGCTCTTTACGCC  
CAATAATTCCGGACAACGCTTGCACCCTACGTATTACCGCGGCTGCTGGCACGAAGTTAG  
CCGGGGCTTCTTCTTCCGGTACCGTCATTATCGTCCCGATCGAAAGGAGTTTACGTACCG  
AAGTACTTCATCCTCCACGCGGCGTTGCTGCGTCAGGGTTTCCCCCATTGCGCAAAATTC  
CCCACTGCTGCCCCCATAGGCTGG

>Otu8358

CCAGCCTACGGGATGCTGCAGTGAGGAATATTGCACAATGGGCGAAAGCCTGATGCAGCG  
ACGCCGCGTGAAGGATGAAGGTCTTCGGATTGTAACTTCTGTAAATGGGAAAAAGAG  
ACCTTCTGAATAGGAAGGGAAGATGATGGTACCATTAGAGAAAGCACCGGCTAACTTCGT  
GCCAGCAGCCGCGGTAATACGAGGGGTGCAAGCGTTATTTCGGATTTATTGGGCGTAAAGG  
GTTTGTAGGCTGTTTCGTTAAGTCATCTATTAAATCTCCTAGCTTAACTAGGAAATGTGG

GTGAAACTGGCGGACTAGAGGATGGAAGAGAGAAGTGGAAATTCCTCGGAGTAGCGGTAAAA  
TGCGTAGATCTCGAGAGGAACACCGATGGCGAAGGCAGCTTCTTGGTCCATATCTGACGC  
TGAAAAACGAAAGCGTGGGGAGCAAACAGGATTAGAAACCCGCGTAGTCC

>Otu8359

CCAGCCTACGGGGTGCTGCAGTGGGGAATATTGCGCAATGGGGGAAACCCTGACGCAGCA  
ACGCCGCGTGAGTGAGGAAGGCCTTCGGGTGTAAAGCTCTTTCGGTTGGGAAGAAGGGG  
ATTTTTGCTAATAACAGAAGTTCTTGATGGTACCAAAGAAGAAGCACCGGCTAACTTCG  
TGCCAGCAGCCGCGGTAATACGAAGGGTGCAAGCGTTATTCGGAATTATTGGGCGTAAAG  
GGTTCGTAGGCGGGAGAACAAGTCAAGTGTGAAATGCCCCGGGCTTAACCTGGAGAGTGCA  
TTTGAAACTGTTTTCTTGAGTATTGGAGAGGGTGGCGGAATTGCTGGTGTAGGAGTGAC  
ATCCGTAGAGATCAGCAGGAACATCGGAGGCGAAGGCGGCCACCTGGACAATTACTGACG  
CTGAGGAACGAAAGCATGGGGAGCAAACAGGATTAGATAACCCCGTAGTCC

>Otu8370

CCAGCCTATGGGGCGCTGCAGTGGGGAATATTGGACAATGGGCGCAAGCCTGATCCAGCC  
ATGCCGCGTGAGTGATGACGGCCTTAGGGTTGTAAAGCTCTTTCGGCAGGGACGATAATG  
ACGGTACCTGCAGAAGCAGCACCGGCTAACTACGTGCCAGCAGCCGCGGTAATACGTAGG  
GTGCAAGCGTTAATCGGAATTACTGGGCGTAAAGCGTGCGCAGGCGGTTTATTAAGTCAG  
CTGTGAAATCCCCGGGCTTAACCTGGGAATGGCAGTTGAGACTGGTAAGCTGGAGTGTGT  
CAGAGGGGGGTAGAATTCCACGTGTAGCAGTGAAATGCGTAGAGATGTGGAGGAATACCG  
ATGGCGAAGGCAGCCCCCTGGGATAACACTGACGCTCATGCACGAAAGCGTGGGGAGCAA  
ACAGGATTAGATAACCCGAGTAGTCC

>Otu8375

CCAGCCTACGGGGGGCACCAGTGGGGAATATTGGACAATGGGGGAAACCCTGATCCAGCG  
ATGCCGCGTGTTGAAGAAGGCCTGAGGGTTGTAAAGCACTTTCAGTGGGGAAGAATCGT  
CTTAGGTTAAGAGCTAAAGGCGTTGACGTTACCCAAAGAAGAAGCACCGGCTAACTCCGT  
GCCAGCAGCCGCGGTAATACGGAGGGTGCAAGCGTTAATCGGAATTACTGGGCGTAAAGC  
GTGCGTAGGTGGTTAGATAAGTTGTCTGTGAAAGCCCTGGGCTTAACCCGGGAAGGTCAG  
GCAAACTGTTTAGCTTTGAGTACAAGAGAGGGTAGTGGAATTTCCGGTGTAGCGGTGAA  
ATGCGTAGATATCGGAAGGAACACCAGTGGCGAAGGCGGCTACCTGGCTTGATACTGACA  
CTGAGGCACGAAAGCGTGGGGAGCAAACAGGATTAGAAACCCCGTAGTCC

>Otu8406

CCAGCCTATGGGTCGCAGCAGTAAGGAATATTGGTCAATGGGCGCAAGCCTGAACCAGCC  
ATGCCGCGTGAGGATGAAGGCCCTCTGGGTGTAAACTTCTTTTACCTGGGACGAAAAA  
CGGGGATTCTCCCCGCCTGACGGTACCAGGTGAATAAGCACCGGCTAACTCCGTGCCAG  
CAGCCGCGGTAATACGGAGGGTGCGAGCGTTATCCGGATTCACTGGGTTTAAAGGGTGCG  
TAGGCGGGTTTTTAAGTCAGTGGTGAATCTTTGGGCTTAACCCGGAACTGCCATTGAT  
ACTGTTTATCTTGAATATTGTGGAGGCCTGCGGAATATGTCATGTAGCGGTGAAATGCTT  
AGATATGACATAGAACACCAATTGCGAAGGCAGCAGGCTACGCATATATTGACGCTGAGG  
CACGAAAGCGTGGGGATCAAACAGGATTAGAAACCCTAGTAGTCC

>Otu8407

CCAGCCTACGGGGCGCTGCAGTGGAGAATATTAGTCAATGAATGAAAGTTTGAAGTAGCG  
TTTTGCGGAGATGATAGATTATAGAAATCGTTAAGACTAGGATAGTTGTAAAGTTTGTGC  
GCAAGTTAAAAAATGATATTATACCTTGAAGAGAACCCCGGGCCAACAACGTGCCAGCAG  
CTGCGGTAAGACGTTGACGGGGAAGCGTTACTAATCGTTACTAGGTGTAAAGAGTGACTA  
GATGGTTTTAAGAATTTATAAATAAAATCATAGAATAGGCGAAGATTTTTATAAAACCTTA  
ATACTTGAAAATAAAAGAGTTTAGTGATAAGCACAACTCTAGAGATAAAATCTGATAGAT  
TGTAAGGATCTTCAGCGGCCGCGGCGACTTCTCATTTTAATTTAACATCGAATCATTGAA  
GTACGAGTGTCAATCAGGATTAGAGACCCGCGTAGTCC

>Otu8413

CCAGCCTATGGGATGCACCAGTGGGGAATATTGGACAATGGGCGCAAGCCTGATCCAGCA  
ATGCCGCGTGTTGAAGAAGGCCTGCGGGTTGTAAAGCACTTTCAGTGGGGAAGAAGGCC  
TTGGTGTTAATATCACTGAGGATTGACATTACCCACAGAAGAAGCACCGGCTAACTCTGT  
GCCAGCAGCCGCGGTAATACAGAGGGTGCAAGCGTTAATCGGAATTACTGGGCGTAAAGG  
GTGCGTAGGTGGTTAATTAAGTCAGATGTGAAATCCCCAGGCTTAACCTGGGAATTGCAT  
TTGAAACTGGTAGACTAGAGTGCGGTAGAGGGGAGTGGAATTTCCGGTGTAGCGGTGAAA  
TGCGTAGATATCGGAAGGAACACCAGTGGCGAAGGCGACTTCCTGGACCGTTACTGACAC  
TGAGGCACGAAAGCGTGGGGAGCAAACAGGATTAGAGACCTCGTAGTTC

>Otu8414

CCAGCCTACGGGTTGCTCCAGTGGGGAATATTGGACAATGGGCGCAAGCCTGATCCAGCA  
ATGCCGCGTGATGAAGAAGGTTTTTCGGATTGTAAAGTCCTTTTCGGCGGGGACGATGATG  
ACGGTACCCGCGAGGAGAAGCCCCGGCTAACTTCGTGCCAGCAGCCGCGGTAATACGAAGG  
GGGCTAGCGTTGCTCGGAATGACTGGGCGTAAAGGGCGCGTAGGCCGGCTTGGCTTGTTAG  
ACGTGAAATTCTGGGCTCAACCTGGGGACTGCGTTTAAAGACGGCTGGGCTGGAGTTCGG  
AAGAGGGTCGTGGAATTCAGTGTAGAGGTGAAATTCGTAGATATTGGGAAGAACACCG  
GTGGCGAAGGCGGCGACCTGGTCCGATACTGACGCTGAGGCGCGAAAGCGTGGGGAGCAA  
ACAGGATTAGATACCCTCGTAGTCC

>Otu8417

CCAGCCTACGGGGGGCTCCAGTCAAGAGTCGTAGGCAATGAGTTAACGCTAGACCACGCT  
ACCTCTAAGGCAGAAGAAGACTTAGGTTGTAAAGGCCTAATTGTAGAACAGAAGAATGAA  
AGCTATCAAGGATAGAGCCGATTAATCATAGTGCCAGCAATAGCGGTCACGCTAGAGGCT  
CAAACGTTTCGCTCATGAACTGGGTCTGAAGCATAGGTAGGAGGCTGAAGGAACCGCGGT  
AAAGGAAGCCTAGAAGGAAGAACTAGACGAATCCGTGTAACGGCAAGCTAGAGTTGTAGA  
GAAGCTATTAGAACGAAGGTTGTACTAGTAAAATGGGAAGAAACCCTTTAGGATGCCAGT  
AGGCGTAGGCGAATAGCTAGATACTAACTGACTCTGAGTTATGATACCAGAGAGAACAAA  
GAGGATTAGAACCCCGGTAGTCC

>Otu8420

CCAGCCTATGGGGGGCTCCAGTGGGGAATTTTACACAATGGGGGAAACCCTGATGTAGCG  
ACACCGCGTGAGCGAAGAAGCCCTTTGGGGTGTAAGCTCTGTCAGCAGGGACGAAAAAA  
ATGACGGTACCTGCAGAGGAAGCATCGGCTAACTACGTGCCAGCAGCCGCGGTAAGACGT  
AGGATGCGAGCGTTGTCCGGATTTATTGGGCGTAAAGAGTTCGTAGGTGGTTTCATAAGT  
CTGGTGTTAAAGACCGGGGCTCAACCTCGGGATCGCACTGGATACTGTGAGACTGGAGTT  
AGGTAGAGGCAATCGGAATTCAGTGTAGCGGTGAAATGCGTAGATATTGGGAAGAACA  
CCGGTGGCGTAAGCGGATTGCTGGGCCTAAACTGACACTGAGGAACGAAAGCCGGGGGAG  
CAAATGGGATTAGAAACCCTCGTAGTCC

>Otu8427

CCAGCCTATGGGGGGCACCAGTGGGGAATATTGCGCAATGGGCGAAAGCCTGACGCAGCA  
ATTCCGCGTGAGGATGAGGTTTCTTGGAATGTAAACTCCTTTTCAGTGGTGACGATAATG  
ACGGTAGCCACAGAAGAAGCACCAGCTAACTACGTGCCAGCAGCCGCGGTAAGACGTAGG  
GTGCAAGCGTTGTCCGGAATTATTGGGCGTAAAGAGTTCGTAGGCCGTTTACCAAGTCTG  
GTGTTAAATACTGAGGCTCAACCTCGGCATGGCATCGGAAACTGGTAGGCTAGAGTATGG  
TAGAGGCAAGGGGAATTCACCGGTGTAGCGGTGAAATGCGTAGATATCGGGAGGAACACCA  
GTGGCGAAAGCGCCTTGCTGGACCATTACTGACGCTGAGGAACGAAAGCCAGGGTAGCGA  
AAGGGATTAGAAACCCGTGTAGTCC

>Otu8430

CCAGCCTACGGGATGCTCCAGTGGGGAATATTGCGCAATGGGCGAAAGCCTGACGCAGCA  
ATTCCGCGTGAGGATGAAGGTTCTTGATCGTAAACTCCTTTTCAGTGGTGACGATTATG  
ACGGTAGCCACAGAAGAGGCACCGGCTAACTACGTGCCAGCAGCCGCGGTAAGACGTAGG  
GTGCAAGCGTTGTCCGGAATTATTGGGCGTAAAGAGTTCGTAGGCCGTTTGCCAAGTCTG  
ATGTTAAAGCCCCGAAGCTCAACTTCGGTATGGCATCGGAAACTGGCAGGCTAGAGTGTGG  
TAGAGGCAAGGGGAATTCACCGGTGTAGCGGTGAAATGCGTAGATATCGGGAGGAACACCA  
GTGGCGAAAGCGCCTTGCTGGGCCATTACTGACGCTGAGGAACGAAAGCCAGGGTAGCGA  
AAGGGATTAGATAACCCAGTAGTCC

>Otu8442

CCAGCCTATGGGTGGCAGCAGTCGGGAAAACCTTCGCAATGCACGTAAGTGTGACGAGGGA  
ATTCTCAGTGCTCAGGTTTAACTGGGCTTTTGCCAAGAGCAAGAATCTTGCGGAATAAG  
TGGTGGGCAAGACTGGTGCCAGCCGCCGCGGTAACCCAGCGCCACGAGTGGGAATCGCT  
TTTATCGGGTCTAAAGCATCCGTAGCCGGTCCGTAAATGTTCTGTGAAATCGTGGCGCT  
CAACGTCACGACGCGCAGAGCACACTGACAGACTTGGGACCAGGAAAGGTATTCGGTATT  
CCAGGGGGAGCGGTAAAATGTGATAATCCTTGAGGACCACCAATGGCGAAGGCAGAATA  
CTAGAATGGATCCGACGGTGAGGGATGAAAGCTAGGGGAGCGATCCGGATTAGAAACCCG  
TGTAGTCC

>Otu8444

CCAGCCTATGGGGTGCTGCAGTGGGGAATTTTTCGCAATGGGCGAAAGCCTGACGCAGCG  
ACGCCGCGTGAGTGATGAAGGCCTTCGGGTTGTAAAGCTCTGTGGGCGGGGACGAATAAG  
GGTTGGCTAATATCCAACCTGATGACGGTACCCGTTTAGCAAGCACCGGCTAACTCTGTG  
CCAGCAGCCGCGGTAAGACAGAGGGTGCAAACGTTGTCCGGAATTACTGGGCGTAAAGCG

CGTGTAGGCTGCTCCGCAGGTCGGATGTGAAAGCCCTGGGCTCAACCTAGGAAGTGCATT  
CGATACTGCAGAGCTTGAGTCCTGGAGAGGAAGGCGGAATTCTCGGTGTAGAGGTGAAAT  
TCGTAGATATCGAGAGGAACACCGGTGGCGAAGGCGGCCCTTCTGGACAGTGAAGTACGCT  
GAGACGCGAAAGCGTGGGGAGCAAACAGGATTAGAAACCCCTCGTAGTCC

>Otu8445

CCAGCCTACGGGGGGCAGCAGCTAAGAATATTCCACAATGGACGCAAGTCTGATGGAGCG  
ACGCCGCGTGGACGATGAAGGCCTTCGGGTGTAAAGTCTTTTCGTGCGGGAAGATTTTT  
CCGCCGGTGAACAATCGGTGGGATCGACTGTACCGCAGGAAGAAGCCCCGGCTAATTACG  
TACCGGCAGCCGCGGTAAATACGTATGGGGCGAGCGTTATTCGGATTTCATTGGGCGTAAAG  
GGTATGCAGGGGGCTTGTTAAGTCGGAAGTGAATTTCCGGGCTCAACCCGGGACTTGCT  
TTCGATACTGGCAAGCTAGAGTTTGGCAGAGGAGAATGGAATTCCAGGTGTAGGGGTGAA  
ATCTGTAGATATCTGGAAGAACACCAGTGGTGAAGACGATTCTCTGGGCCAAAAGTACG  
CTCAGATACGAAAGCCAGGGGAGCAAACGGGATTAGAGACCCTAGTAGTCC

>Otu8448

CCAGCCTACGGGGCGCAGCAGTGGGGAATATTGGACAATGGGCGCAAGCCTGATCCAGCC  
ATGCCGCGTGAGTGATGACGGCCCTAGGGTTGTAAAGTCTTTTACCCACGACGATAATG  
ACGGTAGTGGGAGAAGAAGCCCCGGCTAACTTCGTACCAGCAGCCGCGGTAAATACGAAGG  
GGGCTAGCGTTGCTCGGAATGACTGGGCGTAAAGGGCGCGTAGGCGGATGGCACAGTCAG  
ATGTGAAATTCCCGGGCTTAACCTGGGGGCTGCATTTGATACGTGTTGTCTGGAGTGAGG  
AAGAGGGTCGTGGAATTCACAGTGTAGAGGTGAAATTCGTAGATATTGGGAAGAACACCG  
GTGGCGAAGGCGGCGACCTGGTCCTTGACTGACGCTGAGGCGCGAAAGCGTGGGGAGCAA  
ACAGGATTAGATACCCCTGTAGTCC

>Otu8450

CCAGCCTACGGGTTGCTGCAGTAACGAATATTCCGCAATGCGCGAAAGCGTGACGGAGCA  
ATGCCGCGTGAGTGATGAAGCAGCTTCGCTGTGTAAACTGCTGTCAGGGGTTACTAACAC  
TGAAGAACTCCAGAGGAAGGACCGCTAAACTCGTGCCAGCAGCCGCGGTAAATACGAGTG  
GTCCAAGCGTTAGTCGGAATCACTGGGCTTAAAGGGTGCGTAGGCGGACCAGCAAGTATC  
TTGTGAAACCCACGGCTCAACCGTGGAAGTGCAGGGTAAACTGCTGGTCTTGAGGAAGC  
TAGAGGTGACAGAACGATCGGTGGAGCGGTGGAATGCGTAGATATCGATCGGAATGCCA  
AAGGTGAAGACAGTCACTGGGGCTTTTCTGACGCTCAGGCACGAAAGCGTGGGGATCAA  
ACAGGATTAGAAACCCCTGTAGTCC

>Otu8451

CCAGCCTATGGGGCGCAGCAGTCGAGAATTTTTCTCAATGGGCGAAAGCCTGAAGGAGCG  
ACGCCGCGTGGGGGATGAATGGCTTCGGCCCGTAAACCCCTGTCATTTGCGAACAAATTG  
GTTACCTAACACGTGAACCATTTGATAGTAGCGGAAGAGGAAGGGACGGCTAACTCTGTG  
CCAGCAGCCGCGGTAAATACAGAGGTCCCAAGCGTTGTTTCGGATTCACTGGGCGTAAAGGG  
TGCGTAGGTGGCGAAGTAAGTCGGATGTGAAATCCCGGAGCTTAACCTCCGGAAGTGCATT  
CGATACTGCGGTGCTTGAGGACTGGAGAGGAGATCGGAATTCACGGTGTAGCAGTGAAAT  
GCGTAGATATCGTGAGGAAGACCAGTGGCGAAGGCGGATCTCTGGACAGTTCCTGACACT  
GAGGCACGAAGGCCAGGGGAGCAAACGGGATTAGATACCCCTGTAGTCC

>Otu8452

CCAGCCTATGGGGTGCTGCAGCTAAGAATATTCCGCAATGGACGAAAGTCTGACGGAGCG  
ACGCCGCGTGATGATGAAGGCTTTTCGGGTGTAAATCCTTTTCGTGTGGGAAGATTTTT  
CAGTTTGTGAATAACAAACAGGATTGACTGTACCGCAGGAAGAAGCCCCGGCTAATTACG  
TGCCAGCAGCCGCGGTAAATACGTATGGGGCGAGCGTTATTCGGATTTATTGGGCGTAAAG  
CGTAAGCAGGTGGTCTGTAAAGTTGAGTGTGAAATTTTCAGGCTTAACCTGAAACTTGCA  
TTCAAACTGGCAGACTCGAGTTTGAAGAGGATAATGGAATTCCAGGTGTAGGGGTGAA  
ATCTGTAGATATCTGGAAGAACACCAGTGGCGAAGGCGATTATCTGGTCCAAAAGTAC  
CTCATTTACGAAAGCCAGGGGAGCAAACGGGATTAGATACCCGCGTAGTCC

>Otu8453

CCAGCCTATGGGAGGCTGCAGTGAGGAATATTGGTCAATGGGCGCAAGCCTGAACCAGCC  
ATGCCGCGTGAAGGATGAAGGCCTTCTGGGTGTAAACTCTTTTATGGGGGAAGAAAAT  
TATGGTTTCTACTATAACCGACGGTACCCTAGGAATAAGCACCGGCTAACTCCGTGCCAG  
CAGCCGCGGTAAATACGGAGGATGCGAGCGTTATCCGGATTTATTGGGTTTAAAGGGAGCG  
TAGGCGGTTTTATAAGTCAGTGGTGAATCTCGTTGCTTAACAACGAACGTGCCATTGAT  
ACTGTAGAACTTGAGTACAGATGATGTTGGCGGAATGTGTCATGTAGCGGTGAAATGCTT  
AGATATGACACAGAACACCGATTGCGAAGGCAGCTGACAAAAGTGAAGTACGCGAGAGG  
CTCGAAAGCGTGGGGATCAAACAGGATTAGATACCCGGGTAGTCC

>Otu8456

CCAGCCTACGGGTGGCTCCAGACGAGAATATTCGACAATGGGCGAAAGCCTGATCGAGCG  
ACGCCGCGTGAGGATGAAGTCTTCGGGACGTAAACTCCTTTTGCCAGGGAAAAAGTTA  
TTGATTGTACCTGGAGAATAAGAAGTTGCTAAACTCGTGCCAGCAGCAGCGGTAATACGA  
GTGCTTCGAGCGTTATCCGGAATTATTGGGCGTAAAGGGTGTGTAGGCGGCTATATTAGT  
CTCGCGTTAAATTCTCCGGCTCAACCGGGGAGCTGCGTGGGAAACGGTATGGCTTGAGGA  
CGGAAGAGGTCTCTGGAACCATGGTGTAGCGGTGAAATGCGTTGATATCATGGGGAACA  
CCAAAAGCGAAGGCAAGAGACTGGTCCGCTCCTGTCGCTGAAACACGAAAGCGTGGGTCG  
CGAATGGGATTAGATACCCCACTAGTCC

>Otu8460

CCAGCCTACGGGGCGCACCCAGCAGGGAATCGTACGCAATGGACGAAAGTCTGACGTCGCA  
ATGCCGCGTGAGGATGAAGGCCTTCGGGTCGTAAACTCCTTTTACGGTAGCAGAGATGC  
TACCGAGAATAAGCACCTGCTAACTCTGTGCCAGCAGCCGCGGTAATACAGAGGGTGCAA  
GCGTTATCCGGATTTATTGGGCGTAAAGCGTTTCGTAGGCGATTTGGCAAGTTATTTTTC  
AAATACCACGGCTTAACCGGGGGAAGGGAGATAATACTACCAGATTTGATTTTTTGGTGGG  
GCATCTGGAACCTGATGGTGTAGTAGTGAAATACGTTGATATCATCAGGAACTCCAAGGGC  
GAAGGCAGGATGCTAACCAATTAATGACGCTGAGGAACGACAGCTAGGGGAGCGAAAGGG  
ATTAGATACCCCTGTAGTCC

>Otu8471

CCAGCCTATGGGTGGCACCCAGTGAGGAATTTTGCTCAATGGGCGCAAGCCTGAAGCAGCG  
ACGCCGCGTGAAATGATGAAGTCTTCGGAATGTAAAGTCTTTTGCCAGGGAAAAATAATG  
ATGGTACCTGCAGAATAAGCACCGGCAAACCTATGTGCCAGCAGCCGCGGTAATACATAGG  
GTGCAAGCGTTGTCCGGATTTACTGGGCGTAAAGAGCGTGTAGGTGGAAATTTAAGTCAA  
ACTTGAAATACTAGAGCTTAACCTCTAGTCTGGGTTTGATACTGATTTTCTAGAGATTGGG  
AGAGGAAAGTGGAACCTCACAGTGTAGCGGTGAAATGCGTAGATATTGTGAGGAACACCCG  
TGGCGAAGGCGGCTTTCTGGTCCAATTCTGACACTGAGACGCGAAAGCGTGGGGATCAAA  
CAGGATTAGAAACCCAGTAGTCC

>Otu8474

CCAGCCTATGGGGGGCTGCAGTGGGGAATTTTGCGCAATGGACGAAAGTCTGACGCAGCG  
ACGCCGCGTGGGTGATGAAGGCCTTCGGGTTGTAAAGCCCTGTGGGGAGGGAAGAATAAG  
GTGTGGCTAATAACCGCACTGATGACGGTACCTCCTTAGCAAGCACCGGCTAACTCTGTG  
CCAGCAGCCGCGGTAAGACAGAGGGTGCGAACGTTGTTTCGGAATTACTGGGCGTAAAGCG  
CGTGTAGGCGGCCGCGCAAGTCGGGTGTGAAAGCCCTCGGCTCAACCGAGGAAGTGCACCT  
CGAAACTGCGCGGCTTGAGTCCCGGAGAGGATAGTGGAATTCTCGGTGTAGAGGTGAAAT  
TCGTAGATATCGAGAGGAACACCGGTGGCGAAGGCGGCTATCTGGACGGTGAAGTGCCT  
GAGACGCGAAAGCATGGGGAGCAAACAGGATTAGAGACCCGAGTAGTCTC

>Otu8478

CCAGCCTACGGGTTGCAGCAGTAGGGAATATTGCGCAATGGAGGAAACTCTGACGCAGCG  
ACGCCGCGTGAGTGATGAAGGCCTTCGGGTCGTAAAGCTCTGTGATGAGGAATAATAAA  
TGAATGTACCATGCAAGAAAGGATCGGCTAACTTCGTGCCAGCAGCCGCGGTAAGACGAG  
GGATCCTAGCGTTGTTTCGGAATTATTGGGCGTAAAGCGGGCGCAGGCTGCTTTGTAAGTC  
AGGTGTGAAATCCCAGGGCTCAACCCTGGACGTGCATTTGATACTGCAAAGCTTGAGTGT  
AGGAGAGGTTACTGGAATTCCTGGTGTAGTGGTGAATACGTAGATATCAGGAGGAACTC  
CGGAGGCGAAGGCGGGTAACCTGGCCTAACACTGACGCTCATGCCCCGAAAGCGTGGGGATC  
AAACAGGATTAGAGACCCTCGTAGTCC

>Otu8481

CCAGCCTACGGGGGGCAGCAGTAACGAATATTGGGCAATGGGCGAAAGCCTGACCCAGCG  
ACGCCGCGTGAGGAGGAAGTCTTCGGGATGTAAACTGCTGTCAGGGGTTAGCAAGCAA  
AGGGACCTAACAAAGTTCCGGCGTTGAGCAGCCCCAAAGGAAGCCTCGACTAACTCTGTGC  
CAGCAGTCGCGGTAAGACAGAGGAGGCAAGCGTTGTTTCGGAATCACTGGGCTTAAAGCGC  
GTGTAGGCGGCTAGGTAAGTGTGCTGTGAAATCCAACGGCTCAACCGTTGAACGGCACGG  
CAAACCTTCCTGGCTTGAGGTGCGTAGAGGTGCCTGGAACCTCGGTGGAGCGGTGAAATG  
CGTAGATATCGAGAGGAACGCCAGAGGCGAAAGCGGGGCACTGGGCCGATTCTGACGCTG  
AGACGCGAAAGCGTGGGGAGCAAACAGGATTAGAAACCCGCGTAGTCC

>Otu8482

CCAGCCTACGGGTGGCACCCAGCTAAGAATATTCCGCAATGGGCGCAAGCCTGAACCAGCA  
ACGCCGCGTGAGTGATGAAGGCCTTCGGGTTGTAAACTCCTTTTATGGGGACGAGGAAG  
GACGGTACCCATAGAATAAGCTTCGGCTAACTACGTGCCAGCAGCCGCGGTAAACGTAG

GAAGCGAGCGTTATCCGGATTTACTGGGCGTAAAGCGCATGCAGGCGGTTTGGAAAAGTTG  
GATGTGAAAGCTCCTGGCTTAACTGGGAGAGGTCGTTCAAACTACCAGACTAGAGGATG  
TGAGAGGAAAGTGGAATTCCGAGTGTAGTGGTGAATGCGTAGATATTCGGAGGAACACC  
AGTGGCGAAAGCGGCTTTCTGGCACATAACTGACGCTCATATGCGAAAGCTAGGGTAGCA  
AACGGGATTAGAGACCCGCGTAGTCC

>Otu8484

CCAGCCTATGGGTCGCAGCAGTGGGGAATACTGCTCAATGGGCGAAAGCCTGAAGCAGCG  
ACGCCGCGTGAAACGAAGAAGTCCTTCGGGATGTAAAGTCCTTTCGACAGGGAAAATAATG  
ATGGTACCTGGAGAAGAAGGCCCGGCTAACTATGTGCCAGCAGCCGCGGTAATACATAGG  
GGCCAAGCGTTATCCGGATTTATTGGGCGTAAAGCGCGTGTAGGTGGCTGACTAAGTCAG  
GCGTTAAATCTAGAAGCTCAACTTCTAATCGCGTCTGAAACTGGTGGCTTCGAGGTCGG  
GAGAGGATAGTGGAAGCTCACAGTGTAGCGGTGAAATGCGTAGATATTGTGAGGAACACCA  
GTGGCGAAGGCGACTATCTGGACCGAATCTGACGCTGAGACGCGAAAGCGTGGGGAGCAA  
ACAGGATTAGAGACCCCAGTAGTCC

>Otu8487

CCAGCCTACGGGGGGGCTGCAGTGGGGAATCTTGACAATGGGCGAAAGCCTGATGCAGCA  
ACGCCGCGTGAGTGAAGAAGGCCCTTGGGTCGTAAAGCTCTTTAGGCTGGGAAGAGGGGA  
AACGTAGCTAATACCTACGATTTTTGACGGTACCAGCAGAATAAGCACTGGCTAATTCCG  
TGCCAGCAGCCGCGTAATACGGAAGGTGCAAGCGTTGTTTCGGAGTGACTGGGCGTAAAG  
CGCACGTAGGCGGGTTTGTATGTCGATTGTGAAAGCCCCAGGCTTAACCTGGGAATGGCA  
GTCGAAACTGCAGATCTTGAATGCCCCGAGAGGTTAGTGGAATTCAGGTGTAGGAGTGAA  
ATCCGTAGATATCTGGAGGAACACCAGAGGCGAAGGCGGCTAACTGGTGGTGCATTGACG  
CTGAGGTGCGAAAGCGTGGGGAGCAAACAGGATTAGATACCCTAGTAGTCC

>Otu8491

CCAGCCTACGGGATGCTGCAGCAACGAATCTTCCGCAATGGGCGAAAGCCTGACGGAGCA  
ATGCCGCGTGTTGGGATGAAGTATCTATGGTATGTAAACCACTGTCAGAAAGCAGAAACAC  
TGATTGCTTTCAAAGGAAGTGGCGACTAACTCTGTGCCAGCAGTCGCGGTAATACAGAGG  
CCACGAGCGTTAGTCGGAATCACTAGGCTTAAAGGGTGCGTAGGCGGATTTCCAAGCGTC  
CTGTGAAAGCCTCCCCTCAACGGGAGAACAGCAGGGCGAACTGGAAGTCTCGAGGTTGG  
TAGGGGCTCACAGAACAGTCGGTGGACCGGTGAAATGGGTAGAGATCGACTGGAATGCCG  
ATGGCGAAGGCGGTGAGCTGGGCCAATTCTGACGCTGAGGCACGAAAGCGTGGGGAGCAA  
ACAGGATTAGATACCCTTGTAGTCC

>Otu8497

CCAGCCTACGGGGCGCTCCAGTGGGGAATTTTGCGCAATGGGCGAAAGCCTGACGCAGCA  
ACGCCGCGTGGGTGATGAAGGCCTTCGGGTGTAAAGCTCTGTCAGGAGGGACGAAGCCA  
CTCGGGTTAATAGCCAGAGGGTGACGGTACCTCCAAAGGAAGCCCCGGCTAACTACGTG  
CCAGCAGCCGCGTAATACGTAGGGGGCAAGCGTTGTCCGGAATTATTGGGCGTAAAGAG  
CGTGTAGGCGGCTCGTCAAGTCCGGTGTGAAATCTCGGGGCTCAACCCCGAAACTGCATT  
GGAAACTGGCGAGCTAGAGTCCGGAAGGGGAGATTGGAATTCCTGGTGTAGCGGTGAAAT  
GCGCAGATATCAGGAAGAACACCCGTAGCGAAGGCGGATCTCTGGGACGGTACTGACGCT  
GAGACGCGAAAGCGTGGGGAGCAAACAGGATTAGAAACCCCCGTAGTCC

>Otu8502

CCAGCCTACGGGGCGCAGCAGTCGAGGATCTTCCGCAATGGGCGAAAGCCTGACGGAGCG  
ACGCCGCGTGTTGGGATGAAGGCCTTCGGGTGTAAACCACTGTCACTCGTTATGAAAGGA  
TCCGGTGTTAACAGCATCGGGAAGTACAAAGGCGAGAGAGGGAGCCACGGCTAACTTCG  
TGCCAGCAGCCGCGTAAGACGAAGGTGGCGAGCGTTGTTTCGGAATCACTGGGCATAAAG  
CGCACGTAGGCGGCGATGTAAGTCGGATGTGAAATCCCTCGGCCAACCGAGGAAGTGC  
TCCGAAACTGCATTGCTTGAGGATCAAAGGGGTGCTCGGAATTTCCGGTGGAGCGGTGAA  
ATGCGTTGATATCGGAAGGAACGTCGGCGGCGAAAGCGGAGCACTGGTTGATTATTGACG  
CTGAGGTGCGAAAGCCAGGGGAGCAAACGGGATTAGAAACCCGAGTAGTCC

>Otu8508

CCAGCCTATGGGTGGCTGCAGTGAGGAATCTTCCGCAATGGGCGCAAGCCTGACCGAGCA  
ACGCCGCGTGCGGGACGGAGGCCTTCGGGTGCTAAACCGCTTTTCCCAGGGGCGAGAACG  
GACGGTACCTGGGGAAGAAGCCTCGGCTAACTACGTGCCAGCAGCCGCGGTAATACGTAG  
GAGGCGAGCGTTGTCCGGAGTTACTGGGCGTAAAGGGTGCGCAGGCGGCCTGCCGCGTGG  
GGGGTGAATCGCCCGGCTTAACCGGGCGGGGGCTTTCCAGACGGGCAGGCTTGAGGGGC  
GGAGAGGGGCGCGGAATTCCGGGTGGAGCGGTGAAATGCGTAGAGATCCGGAAGAACACC  
GACGGCGAAGGCAGCGCCCTGGACGCCAACTGACGCTCGGGCACGAAAGCGCGGGGAGCG



AACAGGATTAGAAACCCGAGTAGTCC

>Otu8517

CCAGCCTATGGGGCGCAGCAGTCGAGAATCTTCCACAATGGACGAAAGTCTGATGGAGCG  
ACGCCGCGTGTGGATGAAGTGCTTAGGTACGTAAACAACCTTTTATGAGGGACGAAATTA  
TTGACGGTACCTCATGAATAAGGGGCTCCTAACTCTGTGCCAGCAGGAGCGGTAATACAG  
AGGCCCCAAGCATTACCCGGAATCACTGGGCGTAAAGGGTGTGAGGCGGTCTGTATTAGT  
CGTTCGTAAAATCCGCGCGCTTAACGTGCGGTCCGCGAACGAAACGGTACGACTCGAGGG  
TGGGAGAGGTGCGTGGAACCTCACGGTGTAGGGGTGAAATCCGTTGATATCGTGGGGAACA  
CCAAAGGCGAAGGCAGCGCACTGGCCATTCTGACGCTCACACACGAAAGCCAGGGTAGC  
GAACGGGATTAGAAACCCGCGTAGTCC

>Otu8518

CCAGCCTACGGGGGGCTCCAGTCGAGAATCATTCGCAATGGGCGCAAGCCTGACGATGCG  
ACGCCGTGTGTATGATGGAGGCCTTCGGGTCTGTAAAGTACTTTTCGCCCCGGAACAAGAGA  
TGTTGGCTAATATCCAGCAAAATTTGAGTGTACCGGGTAAAGAAGCGCCGGCTAACTACGT  
GCCAGCAGCTGCGGTAATACGTAGGGCGCAAGCGTTAATCGGAATTATTGGGCGTATAGG  
GCGCGTAGGCGGACCAATTAGTCGGATGTGAAATCCCAGGGCTCAACCCTGGAACAGCAT  
CCGAAACTGTTGTGTCTAGAGGGTAGAAGGCGGAACCGAATTCCACAAGTAGCGGTGAA  
ATGCGTAGATATGTGGAAGAACACCTGTGGCGAAGGCGGTTTCCGATTTTACTCCTGACG  
CTGAGGCGCGAAAGCAAGGGGATCAAACAGGATTAGATACCCGGGTAGTCC

>Otu8519

CCAGCCTACGGGTCTGCTCCAGTGGGGAATTTTTCGCAATGGGGGAAACCCTGACGCAGCA  
ACGCCGCGTGAGAGGATGAAATATCTTGGTATGTAAACTCCTTTTCGATGGGGAAGATTATG  
ACGGTACCCATAGAAGAAGCCCCGGCTAACTTCGTGCCAGCAGCCGCGGTAATACGAGGG  
GGGCAAGCGTTGTTCCGATTTATTAGGCGTAAAGGGTGCCTAGGCGGTTTGACAAGTCTT  
GTGTGAAATCTATGGGCTCAACCCATAGTCTGCACAGGAACTGTGCGGCTTGAGTATGG  
GAGAGGTGAGTGGAATTTCCGGTGTAGCGGTGAAACGCGTAGATATCGGAAGGAACACCA  
GTGGCGAAAGCGACTTTCCTGGTCCAATACTGACGTTTCATGTGCGAAAGCGTGGGGAGCAA  
ACAGGATTAGAAACCCCTCGTAGTCC

>Otu8532

CCAGCCTATGGGGGGCAGCAGTCGAGAATTTTTCTCAATGGGGGAAACCCTGATGCAGCG  
ACGCCGCGTGAGCGATGAAGCCCTTCGGGGTGTAAGCTCTTTTCGGCAGGGACGATTATG  
ACGGTACCTGCAGAAGCAGCTGCGGCTAACTACGTGCCAGCAGCCGCGGTAATACGTAGG  
CAGCAAGCGTTGTTCCGAGTTACTGGGCGTAAAGGGTGCCTAGGCGGTCCTATAAGTATG  
GTGTGAAATCTCCCGGCTTAACCTGGGAGGGTGCGCTATAGACTGTGGGACTAGAGTGTGG  
GAGAGGAAAGTGGAATTCCTGGTGTAGCGGTGAAATGCGTAGATATCAAGTGGAACACCA  
GTGGCGAAGGCGAGTCTCTGGACAATTCTGACGCTGAGGCACGAAAGCCAGGGGAGCAA  
ACGGGATTAGAAACCCCAGTAGTCC

>Otu8533

CAGCCTACGGTGGCAGCAGTAAGGAATATTGGTCAATGGGCGGAAGCCTGAACCAGCCAT  
GCCGCGTGAGGAAGACGGCCCTACGGGTGTAAACTGCTTTTGCAGGGGAATAAACCCC  
CGGTCTGTGATCGGGGCTGAATGTACTCTGAGAATAAGGATCGGCTAACTCCGTGCCAGCA  
GCCGCGGTAATACGGAGGATCCGAGCGTTATCCGATTTATTGGGTTTAAAGGGTGCGTA  
GGCGGCCCTGTAAAGTCAGGGGTGAAAGACGGTAGCTTAACCTATCGCAGTGCCTTTGATAC  
TGCAGGGCTTGAGTACAGACGAGGTAGGCGGAATTGACGGTGTAGCGGTGAAATGCTTAG  
ATATCGTCAAGAACACCGATAGCGAAGGCAGCTTACTAGGCTGTAACCTGACGCTGAGGCA  
CGAAAGTGTGGGGATCAAACAGGATTAGATACCCCCGTAGTCC

>Otu8535

CAGCCTACGGGGCGCTCCAGTGGGGAATCTTGCACAATGGGCGAAAGCCTGATGCAGCAA  
CGCCGCGTGGGGGATGAAGCTTTTCGGAGTGTAACCCCTTTTCGACCCGGAAGAAAGCCC  
GCAAGGGTTTGACGGTACGGGTATAAGAAGCCCCGGCTAACTACGTGCCAGCAGCCGCGG  
TAATACGTAGGGGGCCAGCGTTGCTCGGAATTACTGGGCGTAAAGGGTCTGTAGGCGGTG  
TAGCAAGTCGAGAGTGAAATCCCTGGGCTTAACCCAGGGGTGCTAACGAACTGCTATG  
CTAGAGTGTGAGAGAGGCAAGTGGAATTACGGGTGTAGCGGTGAAATGCGTAGATATCGG  
AAGGAACACCTGTGGCGAAAGCGGCTCACTGGACAATAACTGACGCTGATGCACGAAAGC  
TAGGGGAGCAAACAGGATTAGAGACCCGCGTAGTCC

>Otu8539

CCAGCCTATGGGTGGCTGCAGTGAGGAATTTTCCGCAATGGGCGAAAGCCTGACGGAGCG  
ACGCCGCGTGAGGAGGAAGGCCCTCGGGTCTGTAAACTGCTTTTATTGGTGACGATTTTG

ACGGTAGCCAATGAATAAGGGCCTGCTAACTACGTGCCAGCAGCCGCGGTTCATACGTAGG  
ACCCAAGCGTTATCCGGAATTACTGGGCGTAAAGAGTTGCGTAGGTGGCATAGTAAGCAA  
AAAGTGAATGACTCGGCTCAACCGAGTATACATTTTTTGAAGTGTAAAGCTTGAGTATG  
AGAGAGGTAGATGGAATTTCTAGTGTAGGAGTGAAATCCGTAGATATTAGAAGGAACACC  
GATGGCGTAAGCAGTCTACTAGCTCATTACTGACACTAAGGCACGAAAGCGTGGGGAGCG  
AACGGGATTAGATAACCCCTGTAGTCC

>Otu8550

CCAGCCTACGGGAGGCACCAAGTGGGGAATATTGCGCAATGGGCGGAAGCCTGACGCAGCG  
ACGCCGCGTGGGTGATGAAGGTTTTTCGGATCGTAAAGCCCTGTTGGAGAGGGAAGAACAA  
CTTGAGGAGTAATCCCCTTCGAGCTTGACGGTACCTCTTCAGAAAGCACCGGCTAACTC  
CGTGCCAGCAGCCGCGGTAATACGGAGGGTGCTAACGTTGTTTCGGAATTACTGGGCGTAA  
AGTGCGTGTAGGCGGTTTTGGTGTGTTCAGATGTGAAATCCCTTGGCTCAACTGAGGACGTG  
CATTTGAAACTGCCAGACTGGAGTACGGGAGAGGGTAGTAGAATTCCCGGTGTAGAGGTG  
AAATTCGTAGATATCGGGAGGAATACCCGTGGCGAAGGCGGTACCTGGACCGATACTGA  
CGTGATACGCGAAAGCGTGGGGAGCAAACAGGATTAGATAACCCCTGTAGTCC

>Otu8551

CCAGCCTACGGGATGCTCCAGGGACGAATATTCCGCAATGGGCGAAAGCCTGACGGAGCG  
ACGCCGCGTGTGGGAGGAAGTCCTTCGGGATGTAAACCACTGTCAGGGGCTACCAAGTGA  
ACGCCCATAGCATGGCGGGGAATTGAGGCGCCCCAGAGGAAGCCACGGCTAACTTCGTGC  
CAGCAGCCGCGGTAAGACGAAGGTGGCTAGCGTTGTTTCGGAATCACTGGGCTTAAAGAGC  
ACGCAGGCGGCCTGTTAAGCACCTTGTGAAATCCCTCGGCTCAACCGGGGAATTGCTTGG  
TGTACTGGCAGGCTTGAGGCAAGTAAGGGTGCGTGGAACCTTGGTGGAGCGGTGAAATG  
CGTAGATATCAAGAGGAACGCCGGAGGCGAAAGCGATGCACTGGGCTTGTCCTGACGCTG  
AGGTGCGAAAGCCAGGGGAGCAAACGGGATTAGAAACCCCTCGTAGTTCC

>Otu8552

CCAGCCTATGGGATGCTCCAGTGGGGAATTTTTCGCGCAATGGGGGAAACCCCTGACGCAGCA  
ACGCCGCGTGGAGGATGAAGCCCTTTGGGGCGTAAACTCCTTTTCGACTGGGAAGATAATG  
ACGGTACCAGTGGAAGAAGCACCGGCTAACTCCGTGCCAGCAGCCGCGGTAATACGGAGG  
GTGCGAGCGTTGTTTCGGAATTATTGGGCGTAAAGCGCGTGTAGGCGGTTTTTTAAGTCTG  
ATGTGAAAGCCCTGGGCTCAACCCGGGAAGTGCATTGGAAACTGGGAGACTTGAATGCGG  
GAGAGGGTAGTGGAATTCCTGGTGTAGGAGTGAAATCCGTAGATATCAGGAGGAACACCG  
GTGGCGAAGGCGGCTACCTGGACCGATATTGACGCTGAGACGCGAAAGCGTGGGGAGCAA  
ACAGGATTAGATAACCCTAGTAGTCC

>Otu8557

CCAGCCTACGGGAGGCAGCAGTGGGGAATCTTTCGCGCAATGGACGAAAGTCCGACGCAGCC  
ACGCCGCGTGAGTGAAGAAGGCCTTCGGGTGTAAAGCTCTGTTCGGAGGGGACAAAACC  
GAGTCAGTTAATAGCTGATTCGCTTGATGGTACCCTCAAAGGAAGCACCGGCTAACTTCG  
TGCCAGCAGCCGCGGTAATACGAAGGGTGCAAGCGTTGCTCGGAATTATTGGGCGTAAAG  
GGTAGGTAGGTGGTTACGTATGTCTGGGGTGAAATCCCTGAGCTCAACTCAGGACGTGCC  
TTGGAACGGCGTAAGTAGAGTACTAGAGAGGTTTCGTGGAATTCTTGGTGTAGCGGTGAA  
ATGCGTAGAGATCAAGAGGAACATCAGCGGCGAAGGCGGCGAACTGGATAGTAACTGACA  
CTGAAGTGCAGAAAGTGTGGGGATCAAACAGGATTAGATAACCCCTGTAGTCC

>Otu8564

CCAGCCTACGGGTGGCAGCAGTAAGGAATATTGCACAATGGGCGCAAGCCTGATGCAGCA  
ACGCCGCGTGGAGGAAGAAGGCCTTCGGGTCTGTAAGCTCGTTTTTGTGTCTGACGAGATAG  
GACGGTAGGACACGAATAAGTCACGGCTAACTACGTGCCAGCAGCCGCGGTAAGACGTAG  
GTGGCAAGCGTTATCCGGATTTACTGGGCGTAAAGGGTGTGCAGGCGGGCCACCAAGTGG  
TGTATCAAAGTGCGGCGCTTAACGTCGCAAGGTTATGCCAGACTGGTGGTCTAGAGTGCG  
AGAGAGGGGCGTGGAATTCCGGGTGTAGTGGTGAATGCGTAGAGATCCGGAGGAACCC  
AGAGGCGAAGGCGGCGCCCTGGCTCGCAACTGACGCTCAGCCACGACGGCATGGGGAGCG  
AACGGGATTAGAAACCCGAGTAGTCC

>Otu8565

CCAGCCTATGGGGTGCTCCAGTAACGAATCTTCCGCAATGGGCGCAAGCCTGACGGAGCA  
ATGCCGCGTGCCAGAAGAAGCTCCTCGGAGTGTAATGGCTTTCAGGGTAGGTAATCTC  
GAACCGACTCAGAAGAAGGGGCGACTAACTTCGTGCCAGCAGTCGCGGTAAGACGAAGGC  
CCCGAGCGTTACTCGGATTCCTGAGGCTTAAAGGGTGCGTAGGCGGATCGGAATGTGCTT  
GGTGAATCCACGGCTCAACCGTGGAAGTGCAGGTAGACAACCGGTCTGGAGATGGCT  
AGGGGCAACTGGAAGTCTAGGTGGAGCGGTGAAATGCGTAGATATCTAGGGGAACCCGA

TGGTGAAAACAGGTTGCTGGGGCCATTCTGACGCTGAGGCACGAAAGCGTGGGGAGCAAA  
CGGGATTAGAAACCCCCGTAGTCC

>Otu8566

CAGCCTATGGGGGGCACCAGGCGCGAAACCTTTGCAATGCACGTAAGTGTGACAAGGGAA  
CCCAGAGTGCTCATAACAGTATGGGCTTTTGCCAAGAGCAAATATCTTGGAGAATAAGT  
GGTGGGAAAGACTGGTGCCAGCCGCCGCGGTAACCCCAGCGCCACAAGTGGGGATCGCGT  
TTATTGGGCCTAAAGCATCCGTAGCCGGTTTTGTAAATCTTTTGTGAAATTGTTGGGCTC  
AACCTAACAGCGTGCAGGAGACACTGCAAACTAGGGACCGGGAGGGGTAGGGGTATGC  
AATGGGGAGCGGTAAAATGCTATAATCCATTGTAGACCACCTGTGGCGAAGGCGCCTAAC  
CAGAACGGGTCCGACGGTGAGGGATGAAAGCCAGGGGAGCAAACCGGATTAGATACCCGA  
GTAGTCC

>Otu8567

CAGCCTATGGGGGCTGCAGTAGGGAATATTGGGCAATGGTCGGAAGACTGACCCAGCCAT  
GCCGCGTGCGGGAAGAAGGCGCTATGCGTCGTAAACCGCTTTTATCGGGGAAGAAGAGAG  
GGATGCGTCCCGAATTGACGGTACCCGAGGAATAAGCATCGGCTAACTCCGTGCCAGCAG  
CCGCGGTAATACGAGGATGCGAGCATTGTCCGGATTTATTGGGTTTAAAGGGTGCGTAG  
GCGGCCCCGTTAAGTCATCGGTTAAATGCCCCGGCTCAACCGGGGGAATGCCGGAGATACT  
GACGGGCTTGAGTGTCTGATAAGCGGGCGGAATCGGCGGAGTAGCGGTGAAATGCATAGA  
TACCGCCGGGAACACCGATAGCGAAGGCAGCTCGCGGGTCGACCACTGACGCTGAGGCAC  
GAAAGCGTGGGGATCAAACAGGATTAGAGACCCCCAGTAGTCC

>Otu8569

CCAGCCTATGGGGGGCAGCAGTAAGGGATATTGCGCAATGGGCGAAAGCCTGACGCAGCG  
ACGCCGCGTGCGGGAGGAAGGCCTTCGGGTGTAAACCGCTTTCAGGGGGGACGAAGCCA  
CTCGGGTTAATAGCCCAGAGGGTGACGGTACCTTCAGAAGAAGCCCCGGCTAACTACGTG  
CCAGCAGCCGCGGTAATACGTAGGGGGCAAGCGTTGTCCGGATTCATTGGGCGTAAAGAG  
CGCGTAGGCGGTCAGGCAGGTCCGTCTGTGAAAACCTCGAGGCTCAACCTCGAGGTGTCCGT  
GGAAACCTTCTGGCTAGAGTCCGGAAGAGGAGAGTGGAATTCCTGGTGTAGCGGTGGAAT  
GCGCAGATATCAGGAAGAACACCCGTGGCGAAGGCGGCTCTCTGGGACGGTACTGACGCT  
GAGGCGCGAAAGCGTGGGGAGCAAACAGGATTAGATACCCCCGTAGTCC

>Otu8573

CCAGCCTATGGGTTGCAGCAGTGGGGAATCTTGCGCAATGGACGAAAGTCTGACGCAGCC  
ACGCCGCGTGAGTGAAGAAGGCCTTCGGGTGTAAAGCTCTGTGCCCCGGGACGAAAATG  
CTTGAGGTTAACAGCCTCAGGTACTGACGGTACCGGGAGAGGAAGCACCGGCTAACTTCG  
TGCCAGCAGCCGCGGTAATACGAGGGGTGCAAGCGTTGCTCGGAATTATTGGGCGTAAAG  
GGTAGGTAGGTGGTCTTATTTGTCTGGGGTCAAAGCCTTGAGCTCAACTCAAGAAGTGCC  
CCAGAAACGGTAAGACTAGAGTCCTGGAGAGGGTCTGTGGAATTCCTGGTGTAGCGGTGAA  
ATGCGTAGAGATCGGGAGGAACACCAGAGGCGAAGGCGGCGACCTGGACAGGCACTGACA  
CTCAACTACGAAAGCGTGGGGAGCAAACAGGATTAGAAACCCTCGTAGTCC

>Otu8576

CCAGCCTACGGGTCGCAGCAGTAACGAATCTTCCGCAATGCACGAAAGTGTGACGGAGCG  
ACGCCGCGTGTTGGGATGAAGTTCTTCGGAATGTAAACCACTGTCAGGGGAAAGAAAGTAC  
TGATCTACCCCAGAGGAAGGGACGGCTAACTCTGTGCCAGCAGCCGCGGTAAGACAGAGG  
TCCCAGAGCGTTAGGCGGAATCACTGGGCTTAAAGCGTGTGTAGGCGGATCGTTAAGTGCC  
TTGTGAAATCCCACGGCTTAACCGTGGAATGGCTGGGCAGACTGGCGATCTTGAGCCATC  
TAGGGGCGACCGGAACAAACGGTGGAGCGGTGAAATGCGTAGATATCGTTTGGAACGCCA  
ACGGTGAAAACAGGTGCTGGGGATGTGCTGACGCTGAGACACGAAAGCCAGGGGAGCAA  
ACGGGATTAGAAACCCTTGTAGTCC

>Otu8583

CCAGCCTATGGGTGGCAGCAGTGAGGAATATTGGTCAATGGGCGCAAGCCTGAACCAGCC  
ATGCCACGTGCAGGATGACGGCCTTTTAGGTTGTAACTGCTTTTGTATGGGGTGAATCT  
CTCGAACGTGTTTCGAGATTGACGGTACCGTACGAATAAGGATCGGCTAACTCCGTGCCAG  
CAGCCGCGGTAATACGGAGGATCCAAGCGTTATCCGGATTCATTGGGTTTAAAGGGTGAG  
TAGGCGGGATAATAAGTCAGTGGTGAAATCTTGACGCTTAACTGTAAAATTGCCATTGAT  
ACTGTTATTCTTGAATACAGTTGAGGTAGGCGGAATGTGTAATGTAGCGGTGAAATGCGT  
AGATATTACACAGAACACCGATTGCGAAGGCAGCTTACTAACTGTTATTGACGCTGAGG  
CACGAAAGCGTGGGGATCAAACAGGATTAGATACCCGTGTAGTCC

>Otu8584

CCAGCCTACGGGACGCTGCAGTGAGGAATTTTCGTCAATGGGGGCAACCCTGAACGAGCA

ACGCCGCGTGCAGGATGACGGTTTTTCGGATCGTAAACTGCTTTTCTCAGGGACGAGCAAG  
GACGGTACCTGAGGAATCAGCCCCGGCTAACTACGTGCCAGCAGCCGCGGTAATACGTAG  
GGGGCAAGCGTTGTCCGGATTTATTGGGCGTAAAGCGCACGCAGGCGGTCTTTTAAAGTTC  
GGAGTGACAGTCGTTGGCTTAACCGACGAAGGCCTTGGGAACTGGAAGACTTGAGGGCT  
CAAGAGGGACACGGAATTCCGGGTGTAGTGGTGAAATGCGTAGATATCCGGAGGAACACC  
AATGGCGTAGGCAGTGTCTGGGGAGTACCTGACGCTCAGGTGCGAAAGCCAGGGGAGCG  
AACGGGATTAGATAACCCGGGTAGTCC

>Otu8586

CCAGCCTATGGGTGGCAGCAGCAAGGAATTTTCGGCAATGGAGGAACTCTGACCGAGCA  
ACGCCGCGTGGGCGAAGAAGTCTTTCGGGATGTAAAGCCCTTTTGTGTGAGAAGAAGGAA  
AGACGGTATCACACGAATAAGCATCGGCTAACTACGTGCCAGCAGCCGCGGTAATACGTA  
GGATGCAAGCGTTGTCCGGAATTATTGGGCGTAAAGGGCGTGTAGGCGGTAAACCAAGTC  
AGATGTGAAATATCCCGGCTTAACTGGGAGGGGCCATTTGAACTGGTTAACTAGAGTGC  
AGGAGAGGTGAGTAGAATTCCCGGTGTAGTGGTGAAATGCGTAGATATCGGGAGGAATAC  
CAGTGGCGAAGGCGGCTGACTGGCCTGTAACCTGACGCTGAAACGCGAAGGCTAGGGGAGC  
AAACAGGATTAGAAACCCCCGTAGTCC

>Otu8587

CCAGCCTATGGGTGCGACCCAGTAAGGAATATTGGGCAATGGGCGCAAGCCTGACCCAGCC  
ATGCCGCGTGAAGGATGAAGGCCCTATGGGTGTAAACTTCTTTTGTACGGGAAAAAACCC  
TCCGGTCGTGAACCGGAGCTGATGGTACCGTAAGAATAAGCATCGGCTAACTCCGTGCCA  
GCAGCCGCGGTAATACGGAGGATGCAAGCGTTATCCGGATTCAATTGGGTTTAAAGGGTGC  
GCAGGCGGAGTGATAAGTCAGTGGTGAAATCCTACGGCTCAACTGTAGAACTGCCATTGA  
TACTGTCATTCTTGAGTACTGTTGAGGTGGGCGGAATGTGTCATGTAGCGGTGAAATGCT  
TAGATATGACACAGAACACCGATCGCGAAGGCAGCTCACCAAGCAGAAACTGACGCTCAT  
GCACGAAAGCGTGGGGATCAAACAGGATTAGAAACCCCCGTAGTCG

>Otu8588

CCAGCCTATGGGTGCTGCAGTCGAGAATTTTTCACAATGGGCGAAAGCCTGATGGAGCG  
ACGCCGCGTGGGGGATGAATGGCTTCGGCTCGTAAACCCCTGTCATTTGCGAACAAACCC  
TTGTATTGAACAGATGCAAGGCTGATAGTAGTGAAAGAGGAAGGGACGGCCAACTCTGTG  
CCAGCAGCCGCGGTAATACAGAGGTCCCAAGCGTTGTTTCGGATTCACTGGGCGTAAAGGG  
TGCGTAGGTGGCGGGATAAGTTTGATGTGAAATCTCCGGGCTTAACCTGGAAAATGCATT  
AAAAACTGTTCTGCTAGAGGGTTGGAGGGGGGACTGGAATTCTCGGTGTAGCAGTGAAAT  
GCGTAGATATCGAGAGGAACACCAGTGGCGAAAGCGAGTCCCTGGACAGCTCCTGACACT  
GAGGCACGAAAGCTAGGGGAGCAAACAGGATTAGATACCCTAGTAGTCC

>Otu8592

CCAGCCTATGGGACGCACCAGTCGGGAACTTTTGCAATACACGAAAGTGTGACAAAGCA  
AGCCAAAGTGCTCTTCTTTTGAAGAGCTTTTGTGAGATGTAAAAAGTCTTACGAATAA  
GGACTGGGCAAGACTGGTGCCAGCCGCCGCGGTAATCCCAGCAGTCCAAGTCGCAGCCAC  
ATTTGTTGGGTCTAAAATATCCGTAGCTTGCTTTTCAAGTCTCTTGTGAAATCGGGACTC  
TTAAGGTTCCGGCGGGCAAGAGATACTGTTTAGCTAGAGACCGGGAGGCGCAAGAAGTAC  
GATTAGGGTAGCGGTAAAATGCGTTGATCCTAATTGGACTAACAGTCGCGAAGGCGTCTT  
GCGAGAACGGTTCTGACAGTGAGGGATGAAGGCTAGGGGCGCAAAGTGGATTAGAGACCC  
CCGTAGTCC

>Otu8593

CCAGCCTACGGGTGGCACCAGTGGGGAATTTTGCAGCAATGGGGGAAACCCTGACGCAGCA  
ACGCCGCGTGGAGGATGAAGTTTTTCGGAATGTAAACTCCTACCGCGAGGGAAGAAACGC  
CGATTGGTTCGGCCTGACGGTACCTCGTGAGAAAGCACCGGCTAACTACGTGCCAGCAGCC  
GCGGTAATACGTAGGGTGCAAGTGTGTTTCGGATTTACTGGGTGTAAAGGGAAGTGTAGG  
CGGATATATAAGTCAAAGGTGAAAACCCCGCGCTTAACGCGGGATCTGCCTTTGATACTG  
TGTATCTTGAGTGTGGAGAGGGCAACAGAATTCAGGTGTAGCGGTGGAATGCGTAGAT  
ATCTGGAAGAATACCAGTTGCGAAGGCGGTTACCTGGCCACTCACTGACGCTGAGGCTCG  
AAAGCTGGGGGAGCAAACAGGATTAGAGACCCCGGTAGTCC

>Otu8595

GCCAGCCTACGGGTGGCTCCAGTCGAGAATCTTCCACAATGGACGAAAGTCTGATGGAGC  
GACGCCGCGTGGTTGACGAAGTCCTTCGGGACGTAAAAACCTTTTATGGGGGAGGAAGTA  
ATTGACGTTACCCCATGAATAAGAGGCTCCTAACTCTGTGCCAGCAGGAGCGGTAATACA  
GAGGCCTCAAGCGTTACCCGGATTCACTGGGCGTAAAGGGTGTGTAGGTGGCGATGTTAG  
TCTCTCGTGAAAGCTTTTGGGCTTAACCCAGAAAACGCGGGGGAAACGGCATTGCTTCGA

GGGTGTGAGAGGTGCACGGAACTCATGGTGTAGGGGTGAAATCCGTTGATATCATGGGGA  
ACACCAAATGCGAAGGCAGTGCCTGGCACATTTCTGACACTGAAACACGAAAGCGTG  
TAGCGAGCGGGATTAGATACCCCAGTAGTCC

>Otu8598

CCAGCCTACGGGGTGCACCAGTAAGGAATATTGGACAATGGTGGCAACACTGATCCAGCC  
ATGCCGCGTGAGGATGAAGGCGCTACGCGTTGTAACTGCTTTTGTACGGGAGAAAACC  
TATCTACGTGTAGATAGCTGATAGTACCGTAAGAATAAGCATCGGCTAACTACGTGCCAG  
CAGCCGCGGTAATACGTAGGATGCTAGCGTTGTCCGGATTTACTGGGTGTAAAGGGAGCG  
CAGGCGGGTTGGTAAGTCAGTGGTGAATTTCTCAGGCTTAACCTGAGGACTGCCACCGAT  
ACTGCCAATCTTGAGTGCAGAAGAGGTTGATGGAATTTCTAGGTGTAGCGGTGAAATGCGT  
AGATATCTAGAAGAACACCGATGGCGAAGGCAGTCAACTGGTCTGCTACTGACGCTCATG  
CTCGAAAGCGTGGGGATCAAACAGGATTAGAAACCCCATAGTCC

>Otu8603

CCAGCCTATGGGTTGCACCAGTAACGAATATTCGCAATGGGCGAAAGCCTGACGGAGCG  
ACGCCGCGTGTAAGGAATAAGCTCTTCGGAGTGTAAGTACTGTACGGGGTTACCAAGCAA  
AGAGGGCTAATACCCTTCTGAATTGAGGAGCCCCAGAGGAAGCCACGGCTAACTTCGTGC  
CAGCAGCCGCGGTAAGACGAAGGTGGCAAGCGTTGTTTCGAATCACTGGGCTTAAGAGC  
ACGTAGGCGGCTCATCAAGTGTCTTGTGAAATCCCCCGGCTCAACCGGGGAATCGCTGGA  
TAGACTGACGAGCTTGAGGCAGGTAGGGGCGAGTGGAATCTTGGTGGAGCGGTGGAATG  
CGTAGATATCAAGAGGAACGCCGGAGGTGAAGACGACTCGCTGGGCCTGTCCTGACGCTG  
AGGTGCGAAAGCCAGGGGAGCAAACGGGATTAGAAACCCCTGGCAGTCC

>Otu8604

CCAGCCTACGGGGCGCAGCAGGGAATATTGGTAATCTGCGAAAGCGGGAACCAGCAACGC  
CGCGTGTGCGATGAAGGCCTTCGGGTGTAAGCACTTTTGAGGGGACGAGGAAGGACG  
GTACCCTCAGAAATAAGTCTCGGCTAACTACGTGCCAGCAGCCGCGGTAACACGTAGGAGA  
CGAGCGTTATCCGGATTTACTGGGCGTAAAGGTTGCGTAGGCGGTTTGGTAAGTTGGATG  
TGAAAGCTCCTGGCTTAACTGGGAGAGGTGCTTCAATACTACCGGACTTGAGAGCAGTAG  
AGGAAAGTGGAATTTCCCGGTGTAGTGGTGAATGCGTAGATATCGGGAGGAACACCGAGT  
GCGAAAGCGGCTTTCTGGACTGTTTCTGACACTCATATGCGAAAGCTAGGGTAGCAAACG  
GGATTAGATACCCCAGTAGTCC

>Otu8613

CCAGCCTACGGGTCGCACCAGTGGGGAATATTGGACAATGGGCGCAAGCCTGATCCAGCC  
ATGCCGCGTGAGTGATGACGGCCTTAGGGTTGTAAAGCTCTTTCGCCAGGGACGATAATG  
ACGGTACCTGGATAAGAAGCCCCGGCTAACTTCGTGCCAGCAGCCGCGGTAATACGAAGG  
GGGCTAGCGTTGTTTCGGAATTACTGGGCGTAAAGCGCGCGCAGGCGGCAATCAAGTCAG  
GGGTGAAAGCCCAGAGCTCAACTCTGGAATGCCTTTGAACTGTTTGGCTTGAGTACGA  
GAGAGGTGAGTGGAATTTCCAGTGTAGAGGTGAAATTCGTAGATATTGGGAAGAACACCG  
GTGGCGAAGGCGGCTCACTGGCTCGTTACTGACGCTCAGGCGCGACAGCGTGGGGATCAA  
ACAGGATTAGATACCCCTGTAGTCC

>Otu8614

CCAGCCTATGGGACGCTCCAGTCGAGAATTTTCTCAATGGGGGAAACCCTGAAGGAGCG  
ACGCCGCGTGGGGGATGAAGGACTTCGGTTCGTAAACCCCTGTCACTTGGGAACAAACGT  
CCCAACCTAACACGTTGGGATTTGATAGTACCAGGAGAGGAAGGCACGGCTAACTCTGTG  
CCAGCAGCCGCGGTAATACAGAGGTGCCAAGCGTTGTTTCGATTACTGGGCGTAAAGGG  
TGCGTAGGCGGTCATGTAAGTCGGGTGTGAAATCCCGAGCCTAACTCCGGAATGGCATT  
CGAAACTGCATGGCTCGAGATCTGGAGAGGTGATTGGAATTTCTCGGTGTAGCAGTGAAAT  
GCGTAGATATCGAGAGGAACACCAGAGGCGAAGGCGAATCACTGGACAGTATCTGACGCT  
GAGGCACGAAAGCCAGGGGAGCAAACGGGATTAGAGACCCTTGTAGTCC

>Otu8619

CCAGCCTATGGAAGGCAGCAGTGGGGAATATTGCGCAATGGCCGAAAGGCTGACGCAGCG  
ACGCCGCGTGGGGGATGAAGCATTTTCGGTGTGTAAACCCCTGTTGCTCGGGACGAACAAG  
CGGCTTTAGCCGCTCTGACGGTACCGGGTGAGGAAGCACCGGCTAACTCCGTGCCAGCAG  
CCGCGGTAATACGGAGGGTGCGAGCGTTGTCCGGAATCACTGGGCGTAAAGGGCGCGTAG  
GCGGTCTGCTAAGCGTGTGGTGAAGCTCGGGGCTCAACCCCGAGTCGGCCATGCGAACT  
GGTGGACTAGAGCACTGTAGAGGCAGGTGGAATTCGGGTGTAGCGGTGGAATGCGTAGA  
GATCCGGAAGAACACCGGTGGCGAAGGCGGCCTGCTGGGCAGTAGCTGACGCTGAGGCGC  
GACAGCGTGGGGAGCAAACAGGATTAGAAACCCCAGTAGTCC

>Otu8627

CCAGCCTACGGGTCGCTGCAGTCGAGGATCTTCGGCAATGGGCGCAAGCCTGACCGAGCG  
ACGCCGCGTGTGCGATGAAGGCCTTCGGGTGTAAAGCACTGTCGAGGGGAAGAAAAGCC  
CGCAAGGGTGTGATCGACCCCTGGAGGAAGCACGGGCTAAGTTCGTGCCAGCAGCCGCGG  
TAAGACGAACCGTGCGAACGTTGTCCGGAATCACTGGGCTTAAAGGGCGCGTAGGCGGGC  
GAGCGAGTCAGGGGTGAAAGCCTCCAGCTTAACTGGAGAAGTGCCTTTGATACTGCGAGT  
CTCGAGGGAGGTAGGGGCGTGCGGAACCTCCGGTGGAGCGGTGAAATGCGTAGATATCGG  
AAGGAACATCGGTGGCGAAAGCGGCGCGCTGGACCTCTACTGACGCTGAGGCGCGAAAGC  
CAGGGGAGCAAACGGGATTAGAAACCCTAGTAGTCC

>Otu8639

CCAGCCTATGGGTTCGAGCAGTGGAGAATATTAGTCAATGAATGAAAATTTGAACTAGCG  
TTTTGCGGAAATGAAAGATTCATAGAATCGTTAAGACTAAGATAGTTGTAAAGTTTGTGC  
GCAAGTTAAAAAACGATATTATACTTGAAGAGATCCCCGGGCCAACAACGTGCCAGCAGC  
TGCGGTAAGACGTTGACGGGAAGCGTTACTAATCGTTACTAGGCGTAAAGAATGACTAG  
ATAGTTTAAAGAAATTTATAAAATAAAATCATAGAATAGACGAAGATTTTATAAAACCTTAG  
TACTTGAATAAAAGAGTTTGGTGATAAGCACAATCTAGAGATAAAATTCTAATAGATT  
GTAAGGATCTTCCTAGCCGCGCAACCTCTCATTTTAATTTAACGTCGAATCATTGAAG  
TGCGAGTATCAATCAGGATTAGATACCCGGGTAGTCC

>Otu8642

CCAGCCTACGGGATGCTCCAGTCGAGAATCTTTCGCAATGGGCGCTAAGCCTGACGAAGC  
GACGCCGTGTGTGTGATGAAGGCCCTCGGGTTGTAAAGCACTTTCGCCTAAGAACAAGAA  
AACGCCGCTAATATCGGCGCGCTTTGAGAGTACTAGGTAAAGAAGCACCGGCTAACTACG  
TGCCAGCAGCTGCGGTAATACGTAGGGTGCAAGCATTAAATCGGATTTATTGGGCGTAAAG  
GGCGCGTAGGCGGGAGAGTAAGTCAGATGTGAAAGCCCGGAGCTCAACTCCGGAACAGCA  
TTTGAAGCTGCTCATCTAGAGGGTAGGCGGAGAAAACGGAATTCCACAAGTAGCGGTGAA  
ATGCGTAGATATGTGGAAGAACACCAGTGGCGAAGGCGGTTTTCTAGCTTACACCTGACG  
CTGAGGCGCGAAAGCAAGGGGAGCAAACAGGATTAGAAACCCTAGTAGTC

>Otu8649

CCAGCCTATGGGAGGCTGCAGTGGGGAATCTTGCGCAATGGGCGAAAGCCTGACGCAGCA  
ACGCCGCGTGAGGGAAGAAGGTCTTAGGATTGTAAACCTCTTTCAGTAGGGACGAAGCTT  
CCAAGGTTAATAGCCCTGTGGAGTGACGGTACCTACAGAAGAAGCCCCGGCTAACTACGT  
GCCAGCAGCCGCGGTAATACGTAGGGGGCAAGCGTTGTCCGGAATCATTGGGCGTAAAGC  
GCGTGTAGGCGGCTCGGAAAGTCTGGTGTGAAAACCTTGAGGCTCAACCTCAAGGGTGTCTG  
CTGGATACTATCGAGCTCGAGTCCGGAAGAGGAGAGTGGAATTCCTGGTGTAGCGGTGGA  
ATGCGCAGATATCAGGAGGAACACCAATGGCGAAGGCAGCTCTCTGGTACGTGACTGACG  
CTGAGACGCGAAAGCGTGGGGAGCGAACAGGATTAGATAACCCTGTAGTCC

>Otu8658

CCAGCCTACGGGGCGCTGCAGTGGGGAATTTTGCGCAATGGGGGAAACCCTGACGCAGCC  
ACGCCGCGTGAGTGAAGAAGGCCTTCGGGTGCTAAAGCTCTGTGCGAGGGGACGAAAAGC  
TTCTGGGTAAACAGCCCAAGAGTCTGACGGTACCCTCAAAGGAAGCACCGGCTAACTTCG  
TGCCAGCAGCCGCGGTAATACGAGGGGTGCGAGCGTTGCTCGGAATTATTGGGCGTAAAG  
GGTAGGTAGGTGGTCTCATTTGTCTGGGGTGAAAGCCTTGAGCTTAACTCAAGAAGTGCC  
CTAGAAACGGTGAGACTAGAATCTGTGAGAGGGTCTGTGGAATTCCTGGTGTAGCGGTGAA  
ATGCGTAGAGATCGGGAGGAACACCAGAGGCGAAGGCGGCGACCTGGAGCAGTATTGACA  
CTCAACTACGAAAGCGTGGGTAGCAAACAGGATTAGAAACCCTAGTAGTCC

>Otu8659

CCAGCCTACGGGGGGCTCCAGTGGGGAATTTTGCGCAATGGGGGAAACCCTGACGCAGCA  
ACGCCGCGTGAGGATGAAGTATCTCGGTACGTAAACTCCTTTCGATAGGGAAGATAATG  
ACGGTACCTATAGAAGAAGCCCTGGCTAACTTCGTGCCAGCAGCCGCGGTAATACGAGGG  
GGGCAAGCGTTGTTCCGATTTATTGGGCGTAAAGCGTGCGCAGGCGGTTATGTAAGACAG  
ATGTGAAATGCCCGGGCTTAACCTGGGAACTGCATTTGTGACTGCATGGCTAGAATCTGG  
CAGAGGGGGGTAGAATTCACGTGTAGCAGTGAAATGCGTAGATATGTGGAGGAATACCG  
ATGGCGAAGGCAGCCCCCTGGGCTAAGATTGACGCTCATGCACGAAAGCGTGGGGAGCAA  
ACAGGATTAGAAACCCACAGTAGTCC

>Otu8662

CCAGCCTATGGGGCGCTGCAGTCGAGGATCTTTCGCAATGGGCGAAAGCCTGACGAAGCG  
ACGCCGTGTGAGCGATGAAGGCCTTCGGGTGTAAAGCTCTTTCGCCTGTGAACAAGAGA  
GAGGTGCGAATAACACCTTAATTTGAGCGTAGCAGGTAAAGAAGCACCGGCTAACTACGT  
GCCGGCAGCTGCGGTAATACGTAGGGTGCAAGCATTAAATCGGAATTATTGGGCGTAAAGG

GCGTGTAGGCGGTTTAAATAAGTCAGATGTGAAATTCCGGGGCTCAACCTCGGAGCTGCAT  
TTGAAACTATTAGACTAGAGGGTTGACGGAGAAAACGGAATTCACGTGTAGCGGTGAAA  
TGCGTAGATATGTGGAAGAACACCTGTGGCGAAAGCGGTTTTCTAGTTAACAACCTGACGC  
TGAGGCGCGAGAGCAAGGGGAGCAAACAGGATTAGAAACCCGAGTAGTCC

>Otu8665

CAGCCTACGGGGGGCTGCAGTAGGGAATCTTGCGCAATGGGCGAAAGCCTGACGCAGCCA  
TGCCGCGTGAATGATGAAGGTCTTAGGATTGTAAAATTCTTTCACCGGGGAAGATAATGA  
CGGTACCCGGAGAAGAAGCCCCGGCTAACTTCGTGCCAGCAGCCGCGGTAATACGAAGGG  
GGCTAGCGTTGCTCGGAATTACTGGGCGTAAAGGGCGCGTAGGCGGATATTTAAGTTAGA  
GGTGAAGAGCCAGGGCCCAACCCTGGAACAGCCTTTAATACTGGATATCTTGAGTTCGGG  
AGAGGTGAGTGGAACTCCGAGTGTAGAGGTGAAATTCGTAGATATTCGGAAGAACACCAG  
TGGCGAAGGCGACTCACTGGCCCGATACTGACGCTGAGGCGCGAAAGCGTGGGGAGCAAA  
CAGGATTAGAAACCCGCGTAGTCC

>Otu8669

CCAGCCTACGGGGGGCAGCAGTGGGGAATCTTGCGCAATGGGCGAAAGCCTGACGCAGCG  
ACGCCGTGTGTGCGATGAAGGTTTTTCGGATCGTAAAGCACTGTGCCCCGGGAAAAAGAAA  
TGATGGTACCGGGAGAGGAAGCACCGGCTAACTCTGTGCCAGCAGCCGCGGTAATACAGA  
GGGTGCAAGCGTTAATCGGAATTACTGGGCGTAAAGCGTGCGCAGGCGGTTTCGCTAAGAC  
AGATGTGAAATCCCCGGGCTTAACCTGGGAACCTGCATTTGTGACTGGCGGGCTAGAGTAT  
GGCAGAGGGGGGTAGAATTCACGCTGTAGCAGTGAAATGCGTAGAGATGTGGAGGAATAC  
CGATGGCGAAGGCAGCCCCCTGGGCCAATACTGACGCTCATGCACGAAAGCGTGGGGAGC  
AAACAGGATTAGATACCCAGTAGTCC

>Otu8685

CCAGCCTACGGGTGGCTGCAGTGGGGTATCTTGCGCAATGGACGAAAGTCTGACGCAGCA  
ACGCCGCGTGAGTGATGAAGGTCTTCGGATCGTAAAGCTCTGTGAGGGGGGAAGATGCTT  
GGTGCATCGAATAGATACATCAGGTGACGGTACCCTTAAAGGAAGCACCGGCTAACTCTG  
TGCCAGCAGCCGCGGTAATACAGAGGGTGCAAGCGTTGCTCGGAATTATTGGGCGTAAAG  
GGAGTGTAGGCGGCTAGGTAAGTCTTCTGTGAAATCTACGAGCTTAACTCGTTAAAGTGC  
AGAAGATACTGCTTAGCTTGAGTGTGCGAGAGGATAGTGGAATTCCTGGTGTAGAGGTGA  
AATTCGTAGAGATCGGGAGGAACACCAGTGGCGAAGGCGACTGTCTGGCTGACAACTGAC  
GCTGAGACTCGAAAGCATGGGGAGCAAACAGGATTAGAAACCCTAGTAGTCC

>Otu8686

CCAGCCTACGGGTGGCTCCAGGTTTTCAGCAGAAAGCCAACGATCTTTTACTTTTGGAAC  
GCAAAAGGTGTCCGATTCTGTGTTGAGGGATTAAATTTGGGATGGGAACCCTAGGGGTTACG  
ATAGTATTGTGGAGAACAGCCGAATTGCGTAGGTCAGGAGTAGAGATTGAGTTTTTGTAGT  
TTCGGGGTTCTTGAGCTGGCAAGGCGAGTGAATGAAGAATTAGGAGGGTCGATACTGTCA  
GCATTGTGTGATGACGGAGTGAATGTAGATCGTGGCAGTACCGGCGGGGTTTTTGGCATTC  
CGGGGTATTTACGGGCGTAGGGGTGAACCGGCCTTGTAGAAAATGAATTTTGGCGGTCT  
AGGGTGGACTGGTCGGACGGAGGTTGCCGGGAACGATGCAAGTCCTCAGAGTGAGACGGA  
GAAAGGCGGCGACGTTGGCGGTGATTAGATACCCCTGTAGTCC

>Otu8688

CCAGCCTATGGGGTGCAGCAGTGAAGAATCTTGGGCAATGGACAAAAGTCTGACCCAGTG  
AGAATTACTCCATGACGAATGCGCCCAGTCTTCTGTAAAGTGTTTCGCGAGATGAGGAA  
AATGACTGTAACCTCGGGATGAAGCGCCGACCAACTTCGTGCCAGCAGTCGCGGTAAGACG  
AAGGGCGCGGGTGTTATTCGTTTTGATTGGGTGTAAAGGGTAGGTAGGCGGGCTCGAGTT  
TCTTTGGACAAAATCGCGGAGAGTTCCTACGCGAATTCCTTTTATTAAACGGGTCTTGTG  
TTGAGAGGGGGTTTAGGCAAAATTCGCTTTAGTAGGGGTAGAATCCATCAATATGCGAATG  
AACGTCAGCTGGCGCAGGCGCTTTTCCGATTTCAACAGACGCTGAGCTACGGAAGCTTAG  
GGAGCAAACGGGATTAGATACCCGAGTAGTCC

>Otu8692

CCAGCCTATGGGTTGCAGCAGTGGGGAATTTTGGACAATGGGGGGAACCCTGATCCAGCA  
ACGCCGCGTGAATGAAGAAGGCCTTCGGGTGTAAAGTCTTTTATTGAGGAGCAAAGGA  
TGTGGGTTAATAGCTTACATATATGAGAGTACCAAAGGAATAAGCACCGGCTAACTACGT  
GCCAGCAGCCGCGGTAATACGTAGGGTGCAGGCGTTAATCGGAATTACTGGGCGTAAAGG  
GTGCGTAGGCGGATATATAAGTTAGATGTGAAAAGCCCGGGCTCAACCTTGCTCGTGCAT  
TTAAGACTGTATGTCTAGAGTTTGTAAAGAGGGGGGTAGAATTCAGGTGTAGCAGTGAAAT  
GCGTAGAGATCTGGAGGAATACCGATGGCGAAGGCAGCCCCCTGGGATAGAAGTACGCT  
GAGGCACGAAAGCGTGGGTAGCAAACAGGATTAGAGACCCGAGTAGTCC

>Otu8701

CCAGCCTATGGGAGGCAGCAGTGGGGAATATTGCGCAATGGGCGAAAGCCTGACGCAGCA  
ACGCCGCGTGAGTGAAGAAGGCCTTCGGGTGCAAAGCTCTTTCGGCTGGGAAGAAGGGT  
GTGCGGATTAATACACCGTACATTTGATGGTACCAGAATAAGAAGCACCGGCTAACTTCG  
TGCCAGCAGCCGCGGTAATACGAAGGGTGCAAGCGTTGTTTCGGAATTATTGGGCGTAAAG  
GGATCGTAGGTGGAAGATAAGTCAAGTGTGAAATCCCCGAGCTTAACTTGGGACGTGCA  
CCTGAAACTATTTTTCTTGAGTATCGGAGAGGGTAGTGGAATTGCTGGTGTAGGAGTGAC  
ATCCGTAGAGATCAGCAGGAACACCGGAGGCGAAAGCGACTGCCTGGCCGAAAAGTACA  
CTGAGGAACGAAAGCGTGGGGAGCAAACAGGATTAGATAACCGGGTAGTCC

>Otu8702

CCAGCCTATGGGAGGCAGCAGTGGGGAATATTGGGCAATGGGCGCAAGCCTGACCCAGCC  
ATGCCGCGTGAGTGATGAAGGCCTTCGGGTGCTAAAGCTCTGTGGGGAGGGACGAATAGT  
CCTGTGGCTAACATCCATGGGATTTGACGGTACTTCCTTAGCAAGCACCGGCTAACTCCG  
TGCCAGCAGCCGCGGTAATACGGAGGGTGCAAACGTTGCTCGGAATTATTGGGCGTAAAG  
CGCACGTAGGCGGTTTTGTTAAGTCGGGTGTGAAAGCCCTGGGCTCAACCCAGGAAGTGCA  
TTCGAAACTGGCAAGCTTGAGTATGGAAGAGGGTCTCGGAATTCCTGGTGTAGAGGTGAA  
ATTCTGTAGATATCGGGAGGAACACCAGTGGCGAAGGCGGAGACCTGGGCCAATACTGACG  
CTGAGGTGCGAAAGCGTGGGGAGCAAACAGGATTAGAAACCCGAGTAGTCC

>Otu8705

CCAGCCTACGGGAGGCTGCAGTCGAGAATCTTCCGCAATGGGCGAAAGCCTGACGGAGCG  
ACGCCGCGTGATTGATGAAGGCCTTCGGGTGTAAAACCTCTTTCGCGCACGACGATAATG  
ACGGTAGTGCGAGAAGAAGCTCCGGCTAACTTCGTGCCAGCAGCCGCGGTAATACGAAGG  
GGGCTAGCGTTGTTTCGGAATTACTGGGCGTAAAGCGCGCGCAGGCGGTCTTCCAAGTCAG  
TGGTGAAAGCCCGGAGCTCAACTCCGGAATGCCATTGAACTGTTAGACTTGAGGACGA  
GAGAGGTGAGTGGAATTCCTAGTGTAGAGGTGAAATTCGTAGATATTGGGAAGAACACCG  
GTGGCGAAGGCGGCTCACTGGCTCGTTTTCTGACGCTCAGGCGCGACAGCGTGGAGATCAA  
ACAGGATTAGAAACCCTAGTAGTCC

>Otu8712

CCAGCCTACGGGACGCTGCAGTAGGGAATCTTCCGCAATGGACGAAAGTCTGACGGAGCA  
ACGCCGCGTGAGTGATGAAGGTTTTTCGGATCGTAAAGCTCTGTTGCCAGGGAAGAACGTC  
CGGTAGAGTAACTGCTACCGGAGTGACGGTACCTGAGAAGAAAGCCCCGCTAACTACGT  
GCCAGCAGCCGCGGTAATACGTAGGGGGCAAGCGTTGTCCGGAATTATTGGGCGTAAAGC  
GCGCGCAGGCGGTCAATTTAAGTCTGGTGTTTAAACCTTGGGCTCAACCTAAGGTGCGACT  
GGAACTGGGTGACTTGAGTACAGAAGAGGAAAGTGAATTCACGTGTAGCGGTGAAAT  
GCGTAGATATGTGGAGGAACACCAGTGGCGAAGGCGACTCTCTGGGCTGTAAGTACGCT  
GAGGCGCGAAAGCGGGGGGAGCAAACAGGATTAGATAACCCTCGTAGTCC

>Otu8715

CCAGCCTACGGGGGGCTGCAGTGGGGAATATTGGACAATGGGCGCAAGCCTGATCCAGCC  
ATGCCGCGTGAGTGATGACGGCCTTAGGGTTGTAAAGCTCTGTTCAGGGGGAAAGAAAAAG  
TCGGTTAACAGCCGATGTTGACGGTACCCCCAAAGGAAGCACCGGCTAACTCTGTGCCAG  
CAGCCGCGGTAATACAGAGGGTGCAAGCGTTGTTTCGGAATTACTGGGCGTAAAGCGAGTG  
TAGGCGGCCTATTAAGTCAGATGTGAAATCCCTTGGCTCAACCGAGGAACTGCATCTGAT  
ACTGGTAGGCTTGAGTGTTCGGAGGGGATGGTAGAATTCCTGGTGTAGAGGTGAAATTCGT  
AGATATCAGGAGGAATACCTGTAGCGAAGGCGACCATCTGGAAGACAAGTACGCTGAGA  
CTCGAAAGCGTGGGTAGCAAACAGGATTAGAAACCCCCGTAGTCC

>Otu8718

CAGCCTATGGGGCGCTGCAGTGGGGAATATTGCACAATGGGCGAAAGCCTGATGCAGCGA  
CGCCGCGTGAGGGATGACGGCCTTCGGGTGTAAACCTCTTTCAGCAGGGACGAAGCGCA  
AGTGACGGTACCTGCAGAAGAAGCACCGGCTAACTACGTGCCAGCAGCCGCGGTAATACG  
TAGGGTGCAAGCGTTGTCCGGAATTACTGGGCGTAAAGAGTTTCGTAGGCGGTTTTGTGCG  
TCGTTTGTGAAAACCAGCAGCTCAACTGCTGGCTTGCAGGCGATACGGGCAGACTTGAGT  
ACTGCAGGGGAGACTGGAATTCCTGGTGTAGCGGTGAAATGCGCAGATATCAGGAGGAAC  
ACCGGTGGCGAAGGCGGGTCTCTGGGCAGTAACTGACGCTGAGGAACGAAGGCGTGGGTA  
GCGAACAGGATTAGAAACCCTAGTAGTCC

>Otu8720

CCAGCCTATGGGTCACCAGTAGGGAATATTGCGCAATGGAGGAAACTCTGACGCAGCGAC  
GCCGCGTGGGTGATGAAGGTCTTCGGATCGTAAAGCCCTGTTCGGAAGGGACGAAAAATGA  
GATGGCTAACATCCATTTCACTTGACGGTACCTTCAAAGGAAGCACCGGCTAACTACGTG



CCAGCAGCCGCGGTAATACGTAGGGTGCTAGCGTTGTTTCGGAATCATTGGGCGTAAAGCG  
CGTGTAGGTGGTTAGTTAAGTCGGGTGTGAAATCCCTGGGCTCAACCGAGGAAGTGCATT  
CGAAACTAACTAACTCGAGAGTGGTAGAGGAAGGTGGAATTCCTGTGTAGAGGTGAAAT  
TCGTAGATATACGGAGGAATACCGGTGGCGAAGGCGGCCCTTCTGGACCATTTCTGACACT  
GAGACGCGAAAGCGTGGGGAGCAAACAGGATTAGAAACCCGAGTAGTCC

>Otu8728

CCAGCCTATGGGATGCTCCAGTGGGGAATCTTGCACAATGGACGAAAGTCTGATGCAGCA  
ACGCCGCGTGGGGGATGAAGCTTTTCGGAGTGTAACCCCTTTTCGACCCGGAAGAAAGCC  
CGCAAGGGTTTGACGGTACGGGTATAAGAAGCCCCGGCTAACTACGTGCCAGCAGCCGCG  
GTAATACGTAGGGGGGCCAGCGTTGTTTCGGAATTATTGGGCGTAAAGGGTGCGTAGACGGT  
GCCACAAGTCACTTGTGAAATCCCCAGGCTTAACCTGGGGCCTGCAGGCGAAACTGTGGT  
GCTGGAGTATGGGAGAGGTGCGTGGAATTCCTGGTGTAGCGGTGAAATGCGTAGATATCG  
GGAGGAACACCTGTGGCGAAAGCGGCGCACTGGACCATAACTGACGCTGATGCACGAAAG  
CTAGGGGAGCAAACAGGATTAGAAACCCCTAGTAGTCC

>Otu8739

CCAGCCTATGGGACGCTGCAGTGGGGAATCTTGCACAATGGGCGAAAGCCTGAACGAGCG  
ACGCCGCGTGC CGCATGAAGGCCTTCGGGTGTAAAGCGCGAAAGATGGGACGAAAGCCG  
AAAGTTTTGACCGATCATCAGTAAGCTCGGGCTAAGTTCTGTGCCAGCAGCCGCGGTAAAG  
CGAACCGAGCAAACGTTATTTCGGAATCACTGGGCTTAAAGGGCGCGTAGGCGGGCATTCA  
AGTCTATGGTGAAATCCAACAGCTCAACTGTTGAACTGCCGCGGATACTGGGTGTCTCGA  
GGGAGGTAGGGGCGTGCGGAACTATTGGTGGAGCGGTGAAATGCGTTGATATCAATAGGA  
ACTCCGGTGGCGAAGGCGGCACGCTGGACCTCTTCTGACGCTGAGGCGCGAAAGCCAGGG  
GAGCAAACGGGATTAGAGACCCTTGTAGTCC

>Otu8748

CCAGCCTATGGGGGGCACCAGTAGGGAATATTGCGCAATGGGGGAAACCCTGACGCAGCG  
ACGCCGCGTGAGTGATGAAGGCCTTCGGGTCTGTAAGCTCTGTTGCAAGGGAATAAAAAA  
ATGAATGTACCTTGTGAGGAAGGATCGGCTAACTTCGTGCCAGCAGCCGCGGTAAAGCGA  
GGGATCCTAGCGTTGCTCGGAATCATTGGGCGTAAAGCGGGTGTAGGTGGCTTTGTAAAGT  
CAGGTGTGAAAGCCCAGGGCTCAACCCTGGAAGTGCATTTGATACTGCGAAGCTTAAAGT  
TTGGAGAGGTTCATCGGAATACCTGGTGTAGTGGTGAAATACGTAGATATCAGGTGGAACA  
CCGGAGGCGAAGGCGGGTGACTGGCCAAACACTGACACTGAGACCCGAAAGCGTGGGGAT  
CAAACAGGATTAGATACCCTCGTAGTCC

>Otu8753

CAGCCTACGGGGTGCAGCAGTCGAGAATCTTCCGCAATGGACGAAAGTCTGACGGAGCGA  
CGTTACGTGAAGGATGAAGCCCTTCGGGGTGTAACCTTCTTTTATATGGGAGCAAATTAT  
TGAGAGTACCATATGAATAAGGGGATCCTAATTCTGTGCCAGCAGGAGCGGTAATACAGA  
ATCCCCGAATGTTACCCGGATTTATTGGGCGTAAAGGGTGTGTAGGTGGTTTGGTAAAGT  
CAAAATTAAACCTCATCGGCTTAACCTTTGAGCTGTTTTGAATACTGCCAGACTAAGAGG  
GCGTTAGAGGTGAACGGAACCGATGGAGTAGGGGTGAAATCCGTTGATATCATCGGGAAC  
ACCAAAAGCGAAGGCAGTTCACTGGGGCGACCCTGACACTGAAACACGAAAGCGTGGGGA  
GCAAAAAGGATTAGAAACCCCGGTAGTCC

>Otu8754

CCAGCCTACGGGGCGCTCCAGTGGGGAATTTTTCGCAATGGGGGAAACCCCTGACGCAGCA  
ACGCCGCGTGAGGATGAAGTATCTTGGTACGTAAACTCCTTTTCGATGGGGAAGATAATG  
ACGGTACCCATAGAAGAAGCTCCGGCTAACTTCGTGCCAGCAGCCGCGGTAAATACGAAGG  
GGGCTAGCGTTGTTTCGGAATTACTGGGCGTAAAGCGCGCGCAGGCGGTTCTCCAAGTCAG  
TGGTGAAAGCCCGAGCTCAACTCCGGAAGTCCATTGAAACTGTTGAACTTGAGGACGA  
GAGAGGTGAGTGGAATTCCTAGTGTAGAGGTGAAATTCGTAGATATTGGGAAGAACACCG  
GTGGCGAAGGCGGCTCACTGGCTCGTTTCTGACGCTCAGGCGCGACAGCGTGGGGATCAA  
ACAGGATTAGATACCCTAGTAGTCC

>Otu8755

CCAGCCTATGGGTGGCACCAGTGAGGAATCTTGCACAATGGGCGAAAGCCTGATGCAGCG  
ACGCCGCGTGAGGATGACGGTCTTCGGATTGTAAACTCCTGTAAACGGGAAGAAAGAC  
CTGTTTCTAATACAGACAGGTTATGGCGGTACCGTTAGAGAAAGCACCGGCTAACTTCGT  
GCCAGCAGCCGCGGTAAATACGAGGGGTGCAAGCGTTATTTCGGATTGATTGGGTGTAAAGG  
GTGTGCAGACGGCTTACTAAGTCACTTGTAAATTCCTCGGCCTAACTGAGGATCTGCAG  
GTGAGACTGGAAAGCTAGAGGGTGGAAGAGAGAAGTGGAATTCCTCGGAGTAGCGGTAAAA  
TGCGTAGATCTCGAGAGGAACACCAATGGCGAAGGCAGCTTCTTGGTCCATTTCCTGACGT

TCATACACGAAAAGCGTGGGGAGCAAACAGGATTAGAGACCCCCGTAGTCC

>Otu8756

CCAGCCTACGGGGTGCTCCAGGGAATATTGCACAATGGGCGCAAGCCTGGTGCAGCAATG  
CCGCGTGAAGGATGAAGGTCTTCGGATTGTAAACTTCTTTTGTGGGGATGAAGAAATCC  
TGGTGAATATCCAGGAGATTTGACCGTACCCAAAGAATAACCACCGGCTAACTCCGTGCC  
AGCAGCTGCGGTAATACGGAGGGTGGAAGCGTTGACCGGATTGACTGGGCGTAAAGGGAG  
CGTAGGCGGCTATATAAGTCGATGGTGAAATTTCTGGGCTTAACCCAGGAGCTGCTGTGC  
AAACTGTATAACTAGAGGATATTAAGGGAAAGCGGAATACCACATGTAGCGGTGAAATGC  
GTAGATATGTGGTAGAACACCGGTGGTGAAGACGGCTCTCTGTGATATACCTGACGCTGA  
GGCTCGAAAGTATGGGGATCAAACAGGATTAGAAACCCTGGTAGTCG

>Otu8770

CCAGCCTATGGGATGCAGCAGTTAGGAATCTTCCGCAATGGGCGAAAGCCTGACGGAGCG  
ACACCGCGTGAAGGATGACACCCTTTACTGGGCGTAAACTTCTGTTGTGAGGGACGAAAT  
TTTTGACGGTACCTCACGAGAAAGCACCGGCTAATTCTGTGCCAGCAGCCGCGGTAAGAC  
AGAAGGTGCAAACGTTACTCGGAATTACTGGGCGTAAAGCGTCTGCAGGTGTCCTGCCAC  
GTCCGGCGTCAAAACGCGAGGCTCAACTTCGCGTCCGTGCCGGAACGAGCGGGATCGAG  
CCATTTCAGAGGCATCTGGAATGTCGTGTGTAGGGGTAAAATCCGTAGATCCACGATGGAA  
CGCCAAAAGCGAAGGCAGGATGCTGGGGATGCGCTGACACTCAGAGACGAAAGCGTGGGG  
AGCAAAGGGGATTAGAGACCCTTGTAGTCC

>Otu8771

CCAGCCTACGGGGGGCACCCAGTCGAGAATTTTTCTCAATGGGCGAAAGCCTGAAGGAGCG  
ACGCCGCGTGGGGGATGAATGGCTTCGGCCCGTAAACCCCTGTCATTTGTGAACAAATTG  
CTTCACCCAACACGTGAAGCATTTGATAGTAACGGAAGAGGAAGGGACGGCTAACTCTGTG  
CCAGCAGCCGCGGTAATACAGAGGTCCCAAGCGTTGTTTCGGATTCACTGGGCGTAAAGGG  
TGCGTAGGCGGCGGGGTAAGTCGGGTGTGAAATCTCAGGGCTCAACCCTGAAACTGCACT  
CGATACTGCTCTGCTTGAGGACTGGAGAGGAGACTGGAACCTCACGGTGTAGCAGTGAAAT  
GCGTAGAGATCGTGAGGAAGACCAGTGGCGAAGGCGGGTCTCTGGACAGTTCTCTGACGCT  
GAGGCACGAAGGCCAGGGGAGCAAACGGGATTAGAAACCCTTGTAGTCG

>Otu8785

CCAGCCTACGGGGGGCACCCAGTGGGGAATAATGGACAATGGGGGAAACCCTGATCCAGCG  
ACGCCGCGTGTGTGAAGAAGGCCTGCGGGTTGTAAAGCACTTTTAGTGGGGACAAAAGC  
TACGGATTAATACTCTGTGGTCTTGATTTAACCCAAAGAAAAAGCACCGGCTAACTCTGT  
GCCAGCAGCCGCGGTAATACAGAGGTGCGAGCGTTAATCGGAATTACTGGGCGTAAAGC  
GCGCGTAGACGTTTTGTAAAGTCAGATGTGAAATCCCCGGGCTTAACCTGGGAACTGCAT  
CTGTGACTGCAAGGCTAGAATATAGCAGAGGGGGGTAGAATTCCACGTGTAGCAGTGAAA  
TGCGTAGATATGTGGAGGAATACCGATGGCGAAGGCAGCCCCCTGGGCTAATATTGACGC  
TCATGCACGAAAGCGTGGGGAGCAAACAGGATTAGATACCCGAGTAGTCC

>Otu8788

CCAGCCTATGGGAGGCAGCAGTCGAGGATTTTTCTCAATGGGGGAAACCCTGAAGGAGCG  
ACGCCGCGTGGGGGATGAAGGTCTTCGGATTGTAAACCCCTGTCATCTGGGAACAATGCT  
AGTCACCTAACACGTGCCTAGTTGATAGTACCGGAAGAGGAAGCAGTGGCTAACTCTGTG  
CCAGCAGCCGCGGTAATACAGAGACTGCAAGCGTTGTTTCGGATTCAATTGGGCGTAAAGGG  
TCCGCAGGCGGTCTGTTAAGTCGGGTGTGAAATCTCACAGCCTAACTGTGATAGGTCATT  
CGAAACTAGCAGGCTCGAGGAATGGAGAGGAAACTGGAATAGCTGGTGTAGCGGTGAAAT  
GCGTAGAGATCAGCTAGAACACCGGTGGCGAAGGCGGGTTTCTGGACATTTCTCTGACGCT  
CAGGGACGAAAGCCAGGGGAGCAAACAGGATTAGATACCCCTAGTAGTCC

>Otu8798

CAGCCTATGGGTCGCTGCAGTGGGGAATTTTGCACAATGGGGGAAACCCTGATGCAGCAA  
CGCCGCGTGAGGGAAGAAGTCTTTTCGGGATGTAAACCTCTTTTCGATGGGAAGACAAGCA  
AACGGACGGTACCATCGGAATAAGCATCGGCTAACTACGTGCCAGCAGCCGCGGTAATAC  
GTAGGATGCAAGCGTTGTCCGGAATTATTGGGCGTAAAGGGCGTGCAGGCGGCTTGTCAA  
GTCAGACGTGAAATTTCTTCGGCTTAACCGGAGCGGGTCATCTGAGACTGGCGGGCTAGAG  
TGCAGGAGAGGAAAGCGGAATTTCCCGGTGTAGTGGTGAATGCGTAGATATCGGGAGGAA  
CACCAGAGGCGAAAGCGGCTTTCTGGCCTGTAACCTGACGCTGAGGCGCGAAGGCTAGGGT  
AGCGAACAGGATTAGATACCCCTTGTAGTCC

>Otu8823

CCAGCCTATGGGTGGCAGCAGTGAGGAATATTGGTCAATGGGCGCAAGCCTGAACCAGCC  
ATGCCGCGTGAAGGATGAAGGCCTTCTGGGTGTAAACTTCTTTTATGAGGGAAGAAAAC

TGGGGTTTTCTACTCCAGCCGACGGTACCTTAGGAATAAGCACCGGCTAACTCCGTGCCAG  
CAGCCGCGGTAATACGGAGGGTGCAAGCGTTATCCGGATTTACTGGGTTTAAAGGGTGTG  
TAGGCGGGTCAGTAAGTCAGTGGTGAAATCTCCGGGCTCAACCCGGAACTGCCATTGAT  
ACTATTGGTCTTGAATTCTGTTGAGGAGGGCGGAATATGTCATGTAGCGGTGAAATGCAT  
AGATATGACATAGAACACCGATAGCGAAGGCAGCTCTCAAAGCAGATATTGACGCTGAGG  
CACGAAAGCGTGGGGATCAAACAGGATTAGAAACCCCCGTAGTCC

>Otu8826

CCAGCCTACGGGGGGCTCCAGTGGGGAATTTTGCGCAATGGGGGAAACCTTGACGCAGCA  
ACGCCGCGTGAGGATGAAGTACCTTGGTACGTAAACTCCTTTTCGATCGGGACGATAATG  
ACGGTACCGAGAGAAGAAGCCCCGGCTAACTTCGTGCCAGCAGCCGCGGTAATACGAGGG  
GGGCGAGCGTTGTTTCGGAATTATTGGGCGTAAAGGGCGCGTAGGCGGTGTTGTAAGTCAC  
CTGTGAAACCTCTGGGCTTAACTCAGAGCCTGCAGGCGAAACTGCAATGCTGGAGGGTGG  
GAGAGGTGCGTGGAATTCCTGGTGTAGCGGTGAAATGCGTAGATATCGGGAGGAACACCT  
GTGGCGAAAGCGGCGCACTAGACCACTACTGACGCTGAGGCGCGAAAGCTAGGGGAGCAA  
ACAGGATTAGATACCCCAGTAGTCC

>Otu8827

CCAGCCTACGGGGGGCAGCAGTCGAGAATCTTCGGCAATGAGCGCAAGCTTGACCGAGCG  
ACGCCGCGTGCGGGATGAAGGCCTTCGGGTGTAAACCGCTTTGGTCCGAAAGAAAGGGT  
AAAACCTTGATCGATCGGAGAAACAAGGACGGGCTAAGTTCGTGCCAGCAGCCGCGGTAA  
ACGAACCGTCCAAACGTTATTTCGGAATCACTGGGCTTAAAGGGCGCGTAGGCGGCCGAGC  
GGGTCACGGGTGAAATCCTCCAGCTTAACTGGAGAACTGCCCTTGATACCACTGCGGCTC  
GAGGAAGGAAGGGGCAATCGGAACGTGTCGGTGGAGCGGTGAAATGCGTTGATATCGACAG  
GAACGCCGGTGGCGAAAGCGGATTGCTGGTCCCTTTCTGGCGCTGAGGCGCGAAAGCCAG  
GGGAGCAAACGGGATTAGAAACCTTCGTAGTCC

>Otu8840

CCAGCCTACGGGGGGCAGCAGTCGAGAATTTTTCACAAATGGGCGAAAGCCTGATGGAGCGA  
CGCCGCGTGGGGGATGAATGGCTTCGGCCCCGTAAACCCCTGTCATTCGGGATCAATGCGT  
TTGGGTGAATATCCCAAACGTTGATAGTACCGGAAGAGGAAGGGACGGCTAACTCTGTGC  
CAGCAGCCGCGGTAATACAGAGGTCCCAAGCGTTGTTTCGGATTCACTGGGCGTAAAGGGT  
GCGTAGGTGGTTCGATAAGTTTGATGTGAAATCTCCGGGCTTAACCCGGAAATGGCATTG  
AATACTATTTCGGCTTGAGGATTGGAGGGGGGACTGGAATACTTGGTGTAGCAGTGAAATG  
CGTAGATATCAAGTGGAACACCACTGGCGAAGGCGAGTCCCTGGACAAATCCTGACACTA  
AGGCACGAAAGCTAGGGGAGCAAACAGGATTAGAAACCCCTGTAGTCC

>Otu8845

CCAGCCTATGGGAGGCACCACTGGGGAATCTTGACAAATGGGGGAAACCTGATGCAGCG  
ACGCCGCGTGAGCGATGAAGCCCTTCGGGTGTAAAGCTCTTTCGACGGGAACGATAATG  
ACGGTACCCGGAGAAGAAGCTGCGGCTAACTACGTGCCAGCAGCCGCGGTAATACGTAGG  
CAGCAAGCGTTGTTTCGGAATTATTGGGCGTAAAGGGCGCGTAGGCGGTGCGGTAAGTCAT  
CTGTGAAATCTTCCGGCTCAACCGGGAGACTGCAGGCGAAACTGCCGTGCTGGAGTGTGG  
GAGAGGTGAGTGGAATTCCTGGTGTAGCGGTGAAATGCGTAGATATCGGGAGGAACACCT  
GTGGCGAAAGCGGCGCACTGGACCATTACTGACGCTGAGGCGCGAAAGCTAGGGGAGCAA  
ACAGGATTAGAAACCCCTTGTAGTCC

>Otu8855

CCAGCCTATGGGGGGCTGCAGTCGAGAATATTCGACAATGGGCGAAAGCCTGATCGAGCG  
ACACCGCGTGACAGGATGAAGCCCTTCGGGTGCTAAACTGCGGTAGCTAGGGAAGAATGCA  
AATGACTGTACCTAGCGGAAAGAGGTGGGTAACTACGTGCCAGCACCAGCGGTAATACGT  
AGACCTCAAGCGTTATCCGGATTTATTGGGCGTAAAGCGTATGTAGGAGGTTTTGCGCGT  
CTTTGGTTAAAGCCCACTGCTCAACGGTGGAAGTGCCAAGGATACGGCAGAACTAGAGGG  
AGTTAGAGGTGAATGGAACACCGGTGTAGGGGTGAAATCCGTTGATATCGTGGGGAACA  
CCAAAGGCGAAGGCAGTTCACTGGGACTTTCCTGACTCTGAGTTGCGAAAGCGTGGGGAG  
CAAAAAGGATTAGATACCCGAGTAGTCC

>Otu8857

CCAGCCTACGGGAGGCTGCAGCAACGAATCTTCCCCAATGGGCGAAAGCCTGAGGGAGCG  
ACGCCGCGTGTGGGTTAAGTCCCTTCGGGATGTCAACCACTGTCAGGGCTACGAAAGCGTA  
AGGACCTAATACGTCCTGAGTTGATCTAGTCCAAAGGAAGGGACGGCTAACTCTGTGCCA  
GCAGCCGCGGTAATACAGAGGTCCCAAGCGTTACTGAGAATCACTGGGTTTAAAGGGTGC  
GTAGGTGGTCCGTTAAGTTCGTTGTGAAATCCCTGGGCTCAACCCAGGAACTGCTTCGAA  
TACTGGCGGACTTGAGGCCAGTAGAGGTCACTGGAACGTGACGGTGGAGCGGTGAAATGCG

TAGATATCGTCAGGAACGCCGGTGGTGAAGACGGGTGACTGGGCTGGTTCTGACACTGAG  
GCACGAAAGCGTGAGGAGCGAACGGGATTAGAAACCCTAGTAGTCC  
>Otu8876  
CCAGCCTACGGGAGGCAGCAGTGAGGAATTTTGGACAATGGGCGCAAGCCTGATCCAGCA  
ATATTTATCGTGTAAGAGACGGCTAGCTTCGTAAAACACTTTTGTAAATAGCAATAAT  
GATACATATTTAAGTAATTTAGTCCCGGCTAATTTCTGTGCCAGCAGCCGCGGTAATACGG  
GAGGGGCAAGCGTTATTCATCATAAGCGGGCGTAGAGGGTGAGTAGACGATGTAAACTAG  
TTAATGTTATAAAAAACAAAGAACTTTTTGTTATTTGTAACTAAAAATAAATTAGCGAC  
AAAAAGTGTGGATGGAATTACTAATGTAAAGGTAAAATATAATGATATTAGTACGTACA  
CCAGCGGCGAAGGCAGCTCACATTTTAGTTCGGACGTTGAGGTGCGAAAGCATGGGAATCA  
AACGGGATTAGATACCCGAGTAGTC  
>Otu8888  
CCAGCCTACGGGAGGCACCAAGTGGGGAATCTTGGACAATGGGCGCAAGCCTGATCCAGCC  
ATGCCGCGTGAGTGAAGAAGGCCTTAGGGTTGTAAAGCTCTTTCGCCGACGAAGATAATG  
ACGGTAGTCGGAGAAGAAGCCCCGGCTAACTTCGTGCCAGCAGCCGCGGTGATACGAAGG  
GGGCTAGCGTTGTTTCGAATTACTGGGCGTAAAGCGCACGTAGGCGGACTGTTAAGTCGG  
GGGTGAAAGCCCAGGGCTCAACCCTGGAATGGCCTTCGATACTGGCAGTCTGGAGAACGG  
GAGAGGTGAGTGGAATTCCTAGTGTAGAGGTGAAATTCGTAGATATTAGGAAGAACATCG  
GTGGCGAAGGCGGCGACCTGGTCCATTACTGACGCTGAGGCGCGAAAGCGTGGGGGGCAA  
ACAGGATTAGAAACCCTGGTAGTCC  
>Otu8895  
CCAGCCTACGGGATGCTGCAGTCGAGAATTTTTCACAATGGGCGCAAGCCTGATGGAGCG  
ACGCCGCGTGAGGATGAATGGCTTCGGCCCGTAAACCCTGTCATTCGCGATCAACCGT  
TGTGTTTAAAGAGATGACAATCTGATAGTAGCGGAAGAGGAAGGGACGGCTAACTCTGTG  
CCAGCAGCCGCGGTAATACAGAGGTCCCAAGCGTTGTTTCGGATTCACTGGGCGTAAAGGG  
TGCGTAGGTGGTGAGGTAAGTCGGATGTGAAAGCTCGGAGCTCAACTCCGAAATGGCATT  
GGAACTACCTGACTGGAGGGTCGGAGGGGGGACTGGAATTCCTCGGTGTAGCAGTGAAAT  
GCGTAGATATCGTGAGGAAGACCAGTGGCGAAGGCGAATCTCTGGACAGTTACTGACGCT  
GAGGCACGAAGGCCAGGGGAGCAAACAGGATTAGATACCCTCGTAGTCC  
>Otu8897  
CCAGCCTACGGGGGGCAGCAGTAAGGGATATTGCACAATGGGCGAAAGCCTGATGCAGCA  
ACGCCGCGTGAGGATGAAGGCCTTCGGGTCGTAAACTCGTTTTTGACGCTGACGAGCAAG  
GACGGTAGGCGTCGAATAAGTCACGGCTAACTACGTGCCAGCAGCCGCGGTAACACGTAG  
GAGGCGAGCGTTATCCGGATTTACTGGGCGTAAAGCGCGTGACGGTGGTTTGGTAAGTTG  
GATGTGAAAGCTCCCGGCTCAACTGGGAGAGGTCGTTCAATACTACCAGACTTGAGAGCA  
GTAGAGGGAGGTGGAATTCCTGGTGTAGTGGTGAATGCGTAGATATCGGGAGGAACACC  
AGTGGCGGAAGCGGCCTCCTGGACTGTTTCTGACACTCAGACGCGAAAGCTAGGGTAGCA  
AACGGGATTAGAAACCCTAGTAGTCC  
>Otu8899  
CCAGCCTACGGGACGCAGCAGTCGAGAGGCTTCGGCAATGGGGGAAACCCTGACCGAGCG  
ACGCCGCGTGAGGATGAAGGCCCTTGGGTTGTAAACTCCTTTTGTACGCGAAGAAGTGC  
GATCAGGTGAATAATCTGGTCGTTTGACGGTACCTGACGAATAAGCTCCGGCTAACTCCG  
TGCCAGCAGCCGCGGTAACACGGGGGGAGCAAGCGTTGTTTCGAATCACTGGGCGTAAAG  
GGCGTCTAGGCGGTCAGGTAAGTGGGACGTGAAATACCTCGGCTCACCCGAGGGGACTGCG  
TTCCAAACTGCTTGGCTTGAGTATGGGAGAGGATGTGGGAATTCCTGGTGTAGCGGTGAA  
ATGCGTAGATATCAGGAGGAACACCGGTGGCGAAGGCGCACATCTGGCCCAATACTGACG  
CTGAAGCGCGAAAGCTAGGGGAGCAAACGGGATTAGATACCCTAGTAGTCC  
>Otu8904  
CAGCCTATGGGGGGCAGCAGTGGGGAATATTGGACAATGGGGGAAACCCTGATCCAGCCA  
TGCCGCGTGAGCGATGAAGGCCTTCGGGTTGTAAAGCTCTTTTGGCGGGGACGATGATGA  
CGGTACCCGCGAGAATAAGCTCCGGCTAACTTCGTGCCAGCAGCCGCGGTAATACGAAGGG  
GGCTAGCGTTGTTTCGAATTACTGGGCGTAAAGGGCGCGTAGGCGGTTTGGCAAGTTGGA  
TGTGAAAGCCCAAAGCTCAACTTTGGAATTGCATTCAAGACTGTCAGACTTGAATTCGGT  
AGAGGTAAGTGAATTCCTAGTGTAGAGGTGAAATTCCTAGATATTGGGAAGAACACCCG  
TGGCGAAGGCGGCTTACTGGACCGACATTGACGCTGAGGCGCGAAAGCGTGGGGATCAAA  
CAGGATTAGATACCCCTGTAGTCC  
>Otu8912  
CCAGCCTACGGGTCGCTGCAGTCGAGAATTTTTCACAATGGGCGAAAGCCTGATGGAGCG

ACGCCGCGTGGGGGATGAAGGGCTTCGGCTCGTAAACCCCTGCCATTTCGTGAACAAGGCA  
GGCAGGTGAACAATCTGTTTGTGATAGTAGCGGAAGAGGAAGGGACGGCTAACTCTGTG  
CCAGCAGCCGCGGTAATACAGAGGTCCCAGCGTTGTTTCGGATTTACTGGGCGTAAAGGG  
TGCGTAGGCGGTGAGGTAAGTTTGGTGTGAAATCTCTGGGCCTAACCCAGAAAATGCATT  
GAATACTATCTGACTAGAGTCTTGGAGGGGAGACCGGAATTCTCGGTGTAGCAGTGAAAT  
GCGTAGATATCGAGAGGAACATCAGTGGCGAAGGCGGGTCTCTGGACAAGTACTGACGCT  
GAGGCACGAAAGCCAGGGGAGCAAACGGGATTAGAAACCCTTGTAGTCC

>Otu8913

CCAGCCTATGGGAGGCTGCAGACGAGAATATTCGACAATGGACGAAAGTCTGATCGAGCG  
ACGCCGCGTGGGAAGATGAAGTGCTTCGGCATGTAAATTCCTTTTGCCAGGGAAGAAGTTT  
ATTGATTGTACCTGGAGAATAAGAGGTTGCTAAACTCGTGCCAGCAGCAGCGGTAATACG  
AGTGCCTCGAGCGTTATCCGGAATCATTGGGCGTAAAGGGTGCCTAGGCGGCTATGTTAG  
TCTCGTGTAAATCTTTTCGGCTCAACCGAGAGTCTGCATGGGAAACGGCATAGCTTGAGG  
GCGGGAGAGGTCTCTGGAATCATGGTGTAGCGGTGAAATGCGTTGATATCATGGGGAAC  
ACCAAAGCGAAGGCAAGAGACTGGCCCCGCTCCTGACGCTGAAGCACGAAAGCGTGGGTG  
GCGAATGGGATTAGAGACCCCTGTAGTCC

>Otu8919

CCAGCCTATGGGGCGCTGCAGTCGAGAATTTTTCTCAATGGGCGAAAGCCTGAAGGAGCG  
ACGCCGCGTGGGGGATGAATGGCTTCGGCCCGTAAACCCCTGTCATTTGCGAACAATTG  
ACTCGCCTAACACGTGTGTCAATTGATTGTAGCGGAAGAGGAAGGGACGGCTAACTCTGTG  
CCAGCAGCCGCGGTAATACAGAGGTCCCAAGCGTTGTTTCGGATTCATTGGGCGTAAAGGG  
TGCGCAGGCTGTGGGGTAAGTCGGATGTGAAATTTAGGGGCTCAACCCCTAAACTGCATT  
CGATACTGCTCCGCTAGAGGTATGTAGAGGAGATTGGAATTCACGGTGTAGCAGTGAAAT  
GCGTAGATATCGTGAGGAAGACCAGTGGCGAAGGCGAATCTCTGGGCATTACCTGACGCT  
CATGCACGAAGGCCAGGGGAGCAAACGGGATTAGATACCCCTGTAGTCC

>Otu8924

CCAGCCTATGGGGGGCTGCAGGTTTCGAGTTCTCCACACTGCATGAAAAATGCGATGGGGGA  
ATCCACAGTGCTTATGTCTAACATAGGCTTTTGCCAAGACCAGAAACCTTGCGCAATAAG  
GGTGGGCAAGACCGGTGCCAGCCGCCGCGGTAACACCGGCGCCCCAAGTGGCACTCGCG  
ATTATTGGGCCTAAAGCGTCCGTAGCCGGATTGGTAAATCCTCTGTGAAATCGTGCTACT  
CAACGGTACGGCGCGCAGGGGACACTGCTAGTCTCGGGACCGGGAGGGGTCAGAGGTATG  
CCGTGGGGACCGGTAAAATGGGATAATCCACGGTAGACCACCAATGGCGAAGGCATCTGA  
CCAGAACGGATCCGACGGTGAGGGACGAAAGCCAGGGGAGCGAACC GGATTAGAGACCCG  
AGTAGTCC

>Otu8927

CCAGCCTATGGGGTGCTGCAGTCGAGAATATTCGACAATGGGCGAAAGCCTGATCGAGCG  
ACGCCGCGTGGAGGATGAAGTTCTTCGGAATGTAAACTCCTTTTGCCGGGGAAAAAGTTA  
TTGATTGTACCCGAGAATAAGAAGTTGCTAAACTCGTGCCAGCAGCAGCGGTAATACGA  
GTGCTTCAAGCGTTATCCGGAATCATTGGGCGTAAAGGGTGTGTAGGCGGCGATGTTAGT  
CTCGCGTTAAATCTTTTCGGCTCAACCGAGAGTCCGCGCGGGAAACGGCATTGCTTGAGGA  
TGGAAGGGGTCTGCGGAATCATGGTGTAGCGGTGAAATGCGTTGATATCATGGGGAACA  
CCGAAAGCGTAGGCAGCAGACTGGTCCACTCCTGACGCTGAAACACGAAAGCGTGGGTG  
CGAATGGGATTAGAAACCCCGTAGTCC

>Otu8928

CCAGCCTATGGGGTGCTGCAGTCGAGGATCTTCGGCAATGGGCGCAAGCCTGACCGAGCG  
ACGCCGCGTGGACGATGAAGGCCTTCGGGTGTAAAGTCTGTGAGGGGGAGGAAGCCG  
CAAGGTTGACCTATCCCTGGAGGAAGCACGGGCTAAGTTCGTGCCTGCAGCCGCGGTAAG  
ACGAACCGTGCGAACGTTATTCGGAATCACTGGGCTTAAAGGGCGCGTAGGCGGGTCCG  
AAGTCAGGGGTGAAATCTTCCGGCTTAACCGGAAAACGGCCCCGATACTGGCGGTCTTG  
AGGGGGGTAGGGGCACGCGGAACATCCAGTGGAGCGGTGAAATGCGTTGATATCGGATGG  
AACGCCGCTGGCGAAAGCGGCGTGCTGGACCTCATCTGACGCTGAGGCGCGAAAGCCAGG  
GTAGCGAACGGGATTAGAGACCCCTGTAGTCC

>Otu8929

CCAGCCTATGGGGTGCTGCAGTCGAGAATCTTCGGCAATGGGGGAAACCCTGACCGAGCG  
ACGCCGCGTGTGAGATGAAGGCCTTCGGGTGTAAATCACTGTGCTAGAGGAGGAAATGT  
AGGTGGGTTCTCCCACTTATTTGACCTATTCTAGGAGGAAGGACGGGCTAAGTTTCGTGCC  
AGCAGCCGCGGTAAGACGAACCGTCCAAACGTTATTTCGGAATTACTGGGCTTAAAGGGTG  
CGTGGGCGGTCTGACAAGTTGGGTGTGAAAGCCCTCAGCTCAACTGAGGAACTGCGCCCA

AAACTGTTGAACTCGAGGGAGACATAGGTGAGCGGAACTTAGGGTGGAGCGGTGAAATGC  
GTTGAGATCCTAAGGAACACCAGTAGCGTAAGCGGCTCACTGGGTCTCTTCTGACGCTGA  
TGCACGAAAGCTAGGGGAGCGAAGAGGATTAGATACCCCAGTAGTCC

>Otu8934

CCAGCCTACGGGGGGCTGCAGTGAGGAATATTGCGCAATGGACGGAAGTCTGACGCAGCA  
ATGCCGCGTGCGGGATGAAGGCGCTATGCGTCGTAAACCGCTGTAGCGTGGGGCAAAAAG  
CACCTTGGGGTGTTAGATGGTACCACGAAAGTAAGCATCGGCTAACTACGTGCCAGCAG  
CCGCGGTAATACGTAGGATGCAAGCGTTGTCCGGATTTACTGGGTGTAAAGGGTGCAGCAG  
GCGGGCTTGTAAAGTCAGAGGTGAAAGCCCGGAGCTTAACTCCGGAAATGCCTTTGATACT  
GCAGGTCTTGAATCTGATAGAGGCTCATGGAATATGTGGTGTAGCGGTGAAATGCGTAGA  
TATCACATAGAACACCAGTGGCGAAGGCGGTGAGCTGGGTGAGTATTGACGCTCATGCAC  
GAAAGTGTGGGTAGCAAACAGGATTAGAAACCCTCGTAGTCC

>Otu8936

CCAGCCTATGGGGGGCTCCAGCGGGGAATTTTGCACAATGGGGGAAACCCTGATGCAGCA  
ACGCCGCGTGGAGGATGAAGTCCCTTGGGATGTAAACTCCTTTTCGACCGGGACGATAATG  
ACGGTACCGGTGGAAGAAGCCCCGGCTAACTCTGTGCCAGCAGCCGCGGTAAATACAGAGG  
TCCCAAGCGTTGTTCGGATTCACTGGGCGTAAAGGGTGCCTAGGTGGCGGGTTAGTCGG  
ATGTGAAATCTCCGAGCTCAACTCGGAAATGGCATTGGAAACTGCCTTGCTCGAGGGTTG  
GAGGGGGGACTGGAATACTTGGTGTAGCAGTGAAATGCGTAGATATCAAGTGAACACCA  
GTGGCGAAGGCGAGTCCCTGACAACCTCTGACACTGAGGCACGAAAGCTAGGGGAGCAAA  
CAGGATTAGAAACCCTGAGTAGTCC

>Otu8939

CCAGCCTATGGGGGGCTCCAGTGGGGAATATTGGACAATGGGCGAAACCCTGATCCAGCG  
ACGCCGCGTGTGTGAAGAAGGCCTGCGGGTGTAAAGCACTTTTAGTGGGGACAAAAAGC  
CGAGGGCTAATACCTTTTCGGTCTTGATTTAACCCTAAAGAAAAAGCACCGGCTAACTCTGT  
GCCAGCAGCCGCGTAATACAGAGGGTGCAAGCGTTAATCGGAATTACTGGGCGTAAAGC  
GAGCGTAGTCGGTTATTTAAGTCGGGTGTGAAAGCCCCGGGCTCAACCTGGGAATTGCAT  
TCGATACTGGATAGCTAGAGTTCGGCAGAGGGAAGCGGAATTTCCGGTGTAGCGGTGAAA  
TGCGTAGATATCGGAAGGAACATCAGTGGCGAAAGCGGCTTCCTGGACCAGAACTAACGA  
TCAGGCTCGAAAGCGTGGGGAGCAAACAGGATTAGATACCCGCGTAGTCC

>Otu8943

CCAGCCTATGGGTTGCAGCAGTGGGGAATTTTGGACAATGGGGGCAACCCTGATCCAGCG  
ATGCCGCGTGTGTGAAGAAGGCCTTCGGGTGTAAAGCACTTTTAGTGGGGAAGAAAAGC  
GTAAGGTTAATACCTTTCGGTCTTGACGTTACCTACAGAAAAAGCACCGGCTAACTCTGT  
GCCAGCAGCCGCGTAATACAGAGGGTGCAAGCGTTAATCGGAATTATTGGGCGTAAAGC  
GCACGTAGGTGGATATTTAAGTCGGGTGTGAAAGCCCCGGGCTCAACCTGGGAATCGCAT  
TCGATACTGAATACCTAGAGTATGGTAGAGGGAGGTAGAACTTCCGGTGTAGCGGTGAAA  
TGCGTAGATATCGGAAGGAATACCAGTGGCGAAGGCGGCTTCCTGGACTAATACTGACAC  
TGAGGTGCGAAAGCGTGGGGAGCAAACAGGATTAGAGACCCTAGTAGTCC

>Otu8944

CCAGCCTATGGGGCGCTGCAGCAACGAATCTTCCCCAATGGACGAAAGCCTGATGGAGCG  
ACGCCGCGTGGGGGATGAATGGCTTCGGCCCGTAAACCCCTGTCATTTGCGATCAACCGT  
TATTATTTTAAAAGATGATGACCTGATAGTAGCGAAAGAGGAAGGGACGGCTAACTCTGTG  
CCAGCAGCCACGGTAATACAGAGGTCCCAAGCGTTGTTTCGGATTCACTGGGCGTAAAGG  
TGCGTAGGTGGCGAGGTAAGTCGGATGTGAAATCTCCAAGCTCAACTTGGAATGCAAT  
GGAAACTACCTTGCTCGAGGGTTGGAGGGGGGACTGGAATACTTGGTGTAGCAGTGAAAT  
GCGTAGATATCAAGTGAACACCAGTGGCGAAAGCGAGTCCCTGGACAACCTCTGACACT  
GAGGCACGAAAGCTAGGGGAGCAAACAGGATTAGATACCCCTCGTAGTCC

>Otu8949

CCAGCCTATGGGTGGCAGCAGTGGGGAATCTTCCGCAATGGACGAAAGTCTGACGGAGCG  
ACGCCGCGTGAGTGACGAAGGCCCTCGGGTCGTAAAGCTCTGTCATTGGGGACGAACGGC  
CAGGTCAGGAAATGGGCCTGGAGTGACGGTACCCGAGAAGGAAGCCACGGCTAACTACGT  
GCCAGCAGCCGCGTAATACGTAGGTGGCGAGCGTTGTCCGGAATTATTGGGCGTAAAGC  
GCGCGCAGGTGGGATCTTAAGTCTGTTTTCAAAGTGCGGAGCTTAACTCCGTGATGGGAT  
GGAAACTGGGATTCTTGAGTACCGGAGAGGAAAGCGGAATTTCCCGTGTAGCGGTGAAAT  
GCGTAGATATGGGGAGGAACACCAGTGGCGAAGGCGGCTTTCTGGACGGTGTCTGACACT  
GAGGCGCGAAAGCCAGGGGAGCGAACGGGATTAGAAACCCTAGTAGTCC

>Otu8955

CCAGCCTACGGGTGGCAGCAGTCGAGAATCTTTCACAATGGGGGAAACCCTGATGGAGCG  
ACGCCGCGTGAGGATAAGGTCTTCGGATTGTAAACTCCTGTCATGCGAGAACAAGAAAG  
TGATAGTATCGCAAGAGGAAGAGACGGCTAACTCTGTGCCAGCAGCCGCGGTAATACAGA  
GGTCTCAAGCGTTGTTTCGGAATCACTGGGCGTAAAGGGTGCGTAGGCGGCGCGAAAGTC  
AGATGTGAAATCCGGAGGCTCAACCTCCGAATAGCATCCGATACTACCGCGCTAGAGAGC  
TGTAGGGAAGTCTGGAATTCTCGGTGTAGCAGTGAAATGCGTAGATATCGAGAGGAACGC  
TCGTGGCGAAGGCGAGACTTTGGACAGCAACTGACGCTGAGGCACGAAGGCTAGGGGAGC  
AAACGGGATTAGAGACCCGCGTAGTCC

>Otu8956

CCAGCCTATGGGGGGCTGCAGCTAAGAATCTTCCGCAATGGGGGAAACCCTGACGGAGCG  
ACGCCGCGTGGGGGATGAATGGCTTCGGCCCGTAAACCCCTGTCATTTGCGATCAACCGT  
TGTTATTTTAAAAGATGACAGCCTGATAGTAGCGAAAGAGGAAGGGACGGCTAACTCTGTG  
CCAGCGGCCGCGGTAATACAGAGGTCCCAAGCGTTGTTTCGGATTCACTGGGCGTAAAGGG  
TGCGTAGGTGGCGGGGTAAGTCGGATGTGAAATCTCGGAGCTCAACTCCGAAACTGCATT  
GGAAACTACCTTGCTTGAGGGTTGGAGGGGGGACTGGAATACTTGGTGTAGCAGTGAAAT  
GCGTAGATATCAAGTGGAACACCAGTGGCGAAGGCGAGTCCCTGGACAACCTCTGACACT  
GAGGCACGAAAGCTAGGGGAGCAAACAGGATTAGAAACCCCTCGTAGTCC

>Otu8967

CCAGGCCTACGGGGGGCAGCAGTGGGGAATATTGGACAATGGGGGAAACCCTGATCCAGC  
AATGCCGCGTGTGTGAAGAAGGCCTGAGGGTTGTAAAGCACTTTCAGTGGGGAGGAGGAT  
TATCAGGTTAAGAGCTGGATAATTGGACGTTACCCACAGAAGAAGCACCGGCTAACTCCG  
TGCCAGCAGCCGCGGTAATACGGAGGGTGCGAGCGTTAATCGGAATTACTGGGCGTAAAG  
GGTGCGTAGGTGGTTGGATAAGTTATCTGTGAAAGCCCCGGGCTCAACCTGGGAAGGTCA  
GATAAGACTGTTGACTCGAGTATAGGAGAGGGTAGTGGAATTTCCGGTGTAGCGGTGAA  
ATGCGTAGAGATCGGAAGGAACACCAGTGGCGAAGGCGGCTACCTGGCCTGATACTGACA  
CTGAAGCACGAAAGCGTGGGGAGCAAACAGGATTAGAAACCCGAGTAGTCC

>Otu8969

CCAGCCTAGGGTTGCAGCAGTAGGGAATATTGGACAATGGGCGCAAGCCTGATCCAGCCA  
TGCCGCGTGACAGGAAGAAGGCCTTCTGGGTTGTAAACTGCTTTTGACAGAGAACAACAAAAG  
ACCCTGCGGGGTAAATTGAGTGTATCTGTAGAATAAGCCACGGCTAACTACGTGCCAGCA  
GCCGCGGTAATACGTAGGTGGCAAGCGTTATCCGGATTTATTGGGTTTAAAGGGTGCGTA  
GGCGGTTATGTAAGTCAGTGGTGAAAGACTGCCGCTCAACGGTAGCATTGCCATTGATAC  
TGCCTAGCTAGAGTACAGTAGAGGTAGGCGGAATTTATGGTGTAGCGGTGAAATGCATAG  
ATACCCTAAAGAACACCGATTGCGAAGGCAGCTTACTGGACTGTAAGTACGCTGAGGCA  
CGAAAGTATGGGAATCAAACAGGATTAGAGACCCTGGTAGTCC

>Otu8970

CCAGCCTACGGGGACGCAGCAGTGGGGAATTTTCCGCAATGGGCGCAAAGCCTGACGGAGC  
AATACCGCGTGAGGGAGGAAGGCTCTTGGGTTGTAAACCTCTTTTCTCAGGGAAGAAAAA  
AATGACGGTACCTGAGGAATCAGCATCGGCTAACTCCGTGCCAGCAGCCGCGGTAATACG  
GAGGATGCAAGCGTTATCCGGAATGATTGGGCGTAAAGCGTCCGCAGGTGGTAGTTCAAG  
TCTGCTGTTAAAAAGTTTGGCTCAACCAAATAAGGGCGGTGGAAACTGAATAACTAGAGT  
GTGATAGGGGTAGAGGGAATTCCTGGTGTAGCGGTGAAATGCGTAGAGATCAGGAAGAAC  
ACCGGTGGCGAAAGCGCTCTGCTAGGTCACGACTGACACTGAGGGACGAAAGCTAGGGGA  
GCGAATGGGATTAGATACCCGCGTAGTCC

>Otu8971

CCAGCCTACGGGAGGCTCCAGTGGGGAATCTTGGACAATGGGCGCAAAGCCTGATCCAGCC  
ATGCCGCGTGAGTGATGAAGGCCTTAGGGTTGTAAACTCTTTCGCCGAGGACGATAATG  
ACGGTACTCGGAGAAGAAGCTCCGGCTAACTTCGTGCCAGCAGCCGCGGTAATACGAAGG  
GGGCTAGCGTTGTTTCGGATTTACTGGGCGTAAAGCGCGTGTAGGCGGATTTGTAAGTTGG  
GGGTGAAATCCCGAGGCTCAACCTCGGAACTGCCTCCAAAACCTACAAGTCTGGAGCAAGA  
TAGAGGCAAGTGGAATTGCGAGTGTAGAGGTGAAATTCGTAGATATTTCGAGGAACACCA  
GTGGCGAAGGCGACTTGCTGGATCTTTGCTGACGCTGAGACGCGAAAGCGTGGGGAGCAA  
ACAGGATTAGAAACCCGCGTAGTCC

>Otu8977

CCAGCCTATGGGATGCAGCAGCCAAGAATCTTCCGCAATGGGGGAAACCCTGACGGAGCG  
ACGCCGCGTGAAAGGATGAAGGTCTTCGGATTGTAAACTTCTTTTATCTGGGAAGAATAAG  
TCCGGTAGGAAATGACCGGATGATGACGGTACCAGAGGAATAAGCCCCGGCTAATTACGT  
GCCAGCAGCCGCGGTAATACGTAAGGGGCGAGCGTTGCTCGGAATTACTGGGCGTAAAGG

GCTTGTAGGCGGCCTTGTAAGTCGAATGTGAAAAACCGTGGCTCAACCCCGGAAACGCGT  
TCGAAACTGCGAGGCTTGAGTTTGGTGGAGGGCAATGGAACACCCGGTGTAGCGGTGAAA  
TGCGTAGATATCGGGTAGAACACCGAAGGCTAAAGCAGTTGTCCATGCCAAAACCTGACGC  
TGAGGAGCGAAAGTATGGGGATCAAACAGGATTAGATACCCGTGTAGTCC

>Otu8991

CCAGCCTACGGGTTGCAGCAGACGAGAATATTCCGCAATGGGCGAAAGCCTGACGGAGCG  
ACGCCGCGTGATTGATGAAGTGCTTCGGTACGTAAAGATCTTTTATCGGGGACGAAGTTT  
ATTGACGGTACCCGATGAATAAGGGGCTCCTAACTCTGTGCCAGCAGGAGCGGTAATACA  
GAGGCCCCAAGCATTACCCGGAATCACTGGGCGTAAAGGGTGTCTAGGCGGCCATATTAG  
TCGTTTCGTTAAATCTGCGGGCTCAACCTGCAGGCTGCGAGCGAAGCGGTATGGCTCGAGG  
GCGTAAGAGGTGCACGGAACCTCATGGTGGAGGGGTGAAATCCGTTGATATCATGGGGAAC  
ACCAAAGGCGAAGGCAGTGCACCTGGTACGTTCTTGACGCTCAAACACGAAAGCCAGGGTA  
GCGAACGGGATTAGATACCCCTGTAGTCC

>Otu8992

CCAGTTCGCGATGCCCCGAAAGGGTGACGAAGCGACGCCGCGTGTGGAAGAAGGCCTTCGG  
GTTGTAAACCACTGTCGGGAGTTAAGAAGTGTAAGGGGGTGAATAGTCCTCTTGCTTGAC  
GTTAGCTCCGGAGGAAGCCACGGCTAACTCTGTGCCAGCAGCCGCGGTAATACAGAGGTG  
GCAAGCGTTGTTTCGGAATTATTGCGCGTAAAGAGCACGTAGGTGGCCCTACAAGTCAGCT  
GTGAAATCCTTCTGCTCAACGGAAGAACGGCAGTTGATACTATAGGGTTCGAGTGCGGGA  
GGGGAGAGTGGAACCTCTGGTGGAGCGGTGAAATGCGTAGATATCAGAAGGAACATCGGC  
GGCGAAAGCGACTCTCTGGCCCGTAACTGACGCTGAGGTGCGAAAGCTAGGGGAGCAAAC  
GGGATTA AAAACCCCTCTACTTAGTGCC

>Otu8994

CCAGCCTATGGGGGGCTGCAGTCGAGGATCTTTTGCAATGGGCGAAAGCCTGACAAAGCG  
ACGCTGCGTGAGGATGAAGGCCTTCGGGTGTAAACTCCTGTCAATTCGGAACAATTGC  
CGATCGGCTAATATCCGATCGGTTTGATGGTACCGGAAGAGGAAGCCACGGCTAACTCTG  
TGCCAGCAGCCGCGGTAATACAGAGGTGGCGAGCGTTGTTTCGGATTTACTGGGCGTAAAG  
GGTGCGTAGGTGGTCTTGTGTGTGCGGATGTGAAATCCCACTGCTCAACGGTGGAACGGCA  
TCGGA AACTGCAAGACTCGAGTGCAGGAGGGGAGAGCGGAATACTTGGTGTAGCGGTGAA  
ATGCGTTGATATCAAGTAGAACACCGGTGGCGTAGGCGGCTCTCTGGAATGCAACTGACA  
CTGAGGCACGAAAGCTAGGGAAGCAAACAGGATTAGATACCCTAGTAGTCC

>Otu9006

CCAGCCTACGGGTCGCTGCAGTGGGGAATTTTGGACAATGGGGGCAACCCTGATCCAGCC  
ATGCCGCGTGAGTGAAGAAGGCCTTCGGGTGTAAAGCTCTTTCGCGAGGGAAGAAAAGG  
TTCTGGCTAATATCCAGAGCTCATGACGGTACCTTGATAAGAAGCACCGGCTAACTACGT  
GCCAGCAGCCGCGGTAATACGTAGGGTGCAGCGTTAATCGGAATTACTGGGCGTAAAGC  
GTGCGCAGGCGGTTTTGTAAAGACAGACGTGAAATCCCCGGGCTCAACCTGGGAACTGCGT  
TTGTGACTGCAAGACTAGAGTGTGGCAGAGGGGGGTAGAATTCCACGTGTAGCAGTGAAA  
TGCGTAGAGATGTGGAGGAATACCGATGGCGAAGGCAGCCCCCTGGGCTAACACTGACGC  
TCATGCACGAAAGCGTGGGGAGCAAACAGGATTAGATACCCGAGTAGTCC

>Otu9008

CCAGCCTATGGGTCGCACCAAGTGGGGAATTTTGCACAATGGGGGAAACCCTGATGCAGCA  
ATGCCGCGTGAGGATGAAGTTCTTTGGAACGTAAACTCCTTTTCGATCGGGACGATTATG  
ACGGTACCGGAAGAAGAAGCCCCGGCTAACTCTGTGCCAGCAGCCGCGGTAATACAGAGG  
GGGCAAGCGTTGTTTCGGAATTATTGGGCGTAAAGGGTGCCTAGGCGGTGCGGTAAGTCTT  
TTGTGAAATCTCCGGGCTCAACTCGGAGCCTGCAAAGGATACTGTCGTGCTTGAGTATGG  
GAGAGGTGAGTGGAATTCCTGGTGTAGCGGTGAAATGCGTAGATATCAGGAGGAACACCT  
GTGGCGAAGGCGGCTCACTGGACCATTACTGACGCTGATGCACGAAAGCTAGGGGAGCAA  
ACAGGATTAGATACCCCTGTAGTCC

>Otu9014

CCAGCCTATGGGACGCAGCAGTGGGGAATATTCCGCAATGGGCGAAAGCCTGACGGAGCG  
ACGCCGCGTGATGGATGAAGTGCTTTGGTACGTAAACATCTTTTATCGGGGACGAAGTTT  
ATTGACGGTACCCGATGAATAAGGGGCTCCTAACTCTGTGCCAGCAGGAGCGGTAATACA  
GAGGCCCCAAGCATTACCCGGAATTACTGGGCGTAAAGAGTGTGAGGCGGCCATATTAG  
TCTCTCGTAAAAATCCGTGGGCTCAACCTACGGCGCGCGGGGGAAACGGTATGGCTCGAGG  
GCGCGAGAGGTGCACGGAACCTCATGGTGGAGGGGTGAAATCCGTTGATATCATGGGGAAC  
ACCAAAGGCGAAGGCAGTGCACCTAGTGCGTTCTTGACGCTCAAACACGAAAGCCAGGGTA  
GCGAATGGGATTAGAACCCTAGTAGTCC



>Otu9016

CCAGCCTACGGGGCGCTGCAGTAGGGAATTTTGCGCAATGGGCGAAAGCCTGACGCAGCA  
ACGCCGCGTGAGTGATGAAGCCCTTCGGGATGTAAAGCTCTGTTGAGTGGAAGAAAAAT  
TATCAGTCTAATAAACTGAGAGTCTGACGGTACCATTTCGAGTAAGCACCGGCTAACTACG  
TGCCAGCAGCCGCGGTAATACGTAGGGTGCAAGCGTTGTTTCGGAATCACTGGGTGTAAAG  
GGAGCGTAGGCGGGTTTATAAGTTGGAAGTTTAATACACAGGCTTAACCTGTGAACGGCT  
TTCAAGACTGTATATCTTGAGTATGGGAGAGGGTGATGGAATTCCAGGTGTAGCGGTGGA  
ATGCGTAGATATCTGGAAGAACACCAGCTGCGAAGGCGGTCGCCTGGCCCAATACTGACG  
CTGAGGCTCGAAAGCTAGGGGAGCAAACAGGATTAGAGACCCCTGTAGTCC

>Otu9029

CCAGCCTATGGGGTGCTGCAGTCGAGAATTTTTCACAATGGGGGAAACCCTGATGGAGCG  
ACGCCGCGTGGGGGATGAATGGCTTCGGCCCGTAAACCCCTGTCATTTGCGAACAACTT  
TACGTGTTAATAGCGCGTGAATTGATTGTAGCGGAAGAGGAAGGGACGGCTAACTCTGTG  
CCAGCAGCCGCGGTAATACAGAGGTCCCAAGCGTTGTTTCGGATTCACTGGGCGTAAAGGG  
TGCGTAGGTGGTTCGGGTAAGTCTGATGTGAAATCTCGCAGCTCAACTGCGAAACGGCATT  
GGATACTATCCGGCTAGAGGATCGGAGGGGGGACTGGAATCCTCGGTGTAGCAGTGAAAT  
GCGTAGATATCGAGAGGAACACCAGTGGCGAAGGCGAGTCCCTGGACGACTCCTGACACT  
GAGGCACGAAAGCTAGGGGAGCAAACAGGATTAGAAACCCCTGGTAGTCC

>Otu9035

CCAGCCTATGGGGGGCTGCAGTAGGGAATATTGCGCAATGGAGGAAACTCTGACGCAGCG  
ACGCCGCGTGAGTGACGAAGGACTTCGGTTCGTAAAGCTCTGTTGCAGGGGAATAAGAAA  
GTGAATGTACCCTGTGAGGAAGGGTCGGCTAACTTCGTGCCAGCAGCCGCGGTAAGACGA  
GGGACCCTAGCGTTGTTTCGGAATCATTGGGCGTAAAGCGGATGTAGGTGGCTTGTTAAGC  
CAGGTGTGAAAGCCCCGGGGCTTAACCCCTGGAAGTGCATTTGATACTGCTGAGCTTGAGTG  
CTGGAGAGGCTGCTAGAATTCCTGGTGTGGTGGTGAATACGTAGATATCAGGTGGAATA  
CCGGAGGCGAAGGCGGGTAACTAGCTAGACACTGACACTGAGATCCGAAAGTGTGGGGAT  
CAAACAGGATTAGAAACCCCTAGTAGTCC

>Otu9047

CAGCCTATGGGTCGCTCCAGTGGGGAATTTTGCGCAATGGGGGAAACCCTGACGCAGCAA  
CGCCGCGTGAGGATGAAGTACCTTGGTACGTAAACTCCTTTTCGATCGGGACGATAATGA  
CGGTACCGAGAGAAGAAGCCCCGGCTAACTTCGTGCCAGCAGCCGCGGTAATACGAGGGG  
GGCGAGCGTTGTTTCGGAATTATTGGGCGTAAAGGGTGCCTAGGCGGTTTTGTAAAGTCGA  
TGTGAAATCCCCAGGCTCAACTTGGGAACCGCATCTGATACTGCATGACTAGAGTACTGC  
AGAGGGAAACGGAATTCCTGGTGTAGAGGTGAAATTCGTAGATATCAGGAGGAACACCGG  
TGCGCAAGGCGGTTTTCTGGGCAGATACTGACACTGAGGCGCGAAAGCGTGGGTAGCAAA  
CAGGATTAGAAACCCCTGTAGTCC

>Otu9050

CCAGCCTACGGGAGGCTGCAGGGAATCGTACACAATGGACGAAAGTCTGATGTCGCAATG  
CCGCGTGGAGGATGAAGGCCTTCGGGTTGTAAACTCCTTTTACAGTAATAGAGATGTTAT  
TGAGAATAAGCACCTGCTAACTCTGTGCCAGCAGCCGCGGTAATACAGAGGGTGCAAGCG  
TTATCCGGATTTATTGGGCGTAAAGCGTTTCGTAGGTGACCAGGTAAGTTATCTTTCAAA  
GACCACGGCTCAACCGGGGGAAGGGAGGTAATACTGCCGGGTTTGATTTATGGTGGGGCT  
TCTGGAAGTATGGTGTAGTAGTGAAATACGTTGATATCATCAGGAACTCCAAGGGCGAA  
GGCAGGAAGCTAACCATGTAATGTCACTGAGGAACGACAGCTAGGGGAGCGAAAGGGATT  
AGAAACCCGCGTAGTCC

>Otu9058

CCAGCCTATGGGGGGCTCCAGTGGGGAATATTGGGCAATGGGCGAAAGCCTGACCCAGCA  
ATGCCGCGTGAGTGATGAAGGTCGAAAGATTGTAAAGCTCTTTTGCCGGGGACGATTATG  
ACGGTACCCGGAGAATAAGGACTGACTAACTACGTGCCAGCAGTCGCGGTAATACGTAGA  
GTCCAAGCGTTACTCGGAATTACTGGGCGTAAAGTATGCGTAGGCGGTTTTGTAAAGTCAG  
TAGTGAAATACCGGGGCTCAACTTCGGTGCTGCTATTGATACTGCATTACTAGAGTCTGG  
TAGAGGGAAACGGAATTCCTTAGTGTAGGGGTAAAATCCATAGATATTAAGAGGAACGCCG  
GAGGCGAAAGCGGTTTTCTGGGCCATGACTGACGCTGAGGCATGACAGCGTGGGGAGCAA  
ACAGGATTAGAAACCCAGTAGTCC

>Otu9065

CCAGCCTACGGGATGCAGCAGTGGGGAATATTGGACAATGGGCGCAAGCCTGGTCCAGCC  
ATGCCGCGTGAGTGATGAAGGCCTTCGGGTTGTAAAGCTCTTTTCGACGGGGACGATGATG  
ACGGTACCCGTAGAAGAAGCCCCGGCTAACTTCGTGCCAGCAGCCGCGGTAATACGAAGG

GGGCAAGCGTTGTTTCGGAATTACTGGGCGTAAAGGGCGCGTAGGCGGCTTCGTCAAGTCAG  
GTGTGAAAGCCCTGGGCTCAACCCGGGAAGTGCATTTGATACTGCGAAGCTCGAGTCTCG  
GAGAGGTTGGTGGAATTCACAGTGTAGAGGTGAAATTCGTAGAGATTGGGAAGAACACCG  
GTGGCGAAGGCGGCCAACTGGACGAGCACTGACGCTGAGGCGCGAAAGCGTGGGGAGCAA  
ACAGGATTAGATACCCCTGTAGTCC

>Otu9067

CCGCCTACGGGGGGCTGCAGTGGGGAATTTTGGACAATGGGCGCAAGCCTGATCCAGCCA  
TGCCGCGTGAGTGAAGAAGGCCTTCGGGTGTAAAGCTCTTTCGCGAGGGAAGAAAAGGC  
TACAGATAATACCTGTGGCCCATGACGGTACCTTGATAAGAAGCACCGGCTAACTACGTG  
CCAGCAGCCGCGGTAATACGTAGGGTGCGAGCGTTAATCGGAATTACTGGGCGTAAAGCG  
AGCGCAGGCGGTTCTAAAAGCCAGATGTGAAATCCCCGAGCTCAACTTGGGAACTGCGTT  
TGGAACCTCTAGGACTAGAGTGTGTGAGAGGGAGGTAGAATTCACGTGTAGCAGTGAAAT  
GCGTAGAGATGTGGAGGAACACCGATGGCGAAGGCAGCCTCCTGGGATAAACTGACGCT  
CATGCTCGAAAGCGTGGGGAGCAAACAGGATTAGAGACCCCAGTAGTCC

>Otu9071

CCAGCCTACGGGAGGCACCAGTAGGGAATATTGCACAATGGAGGAAACTCTGATGCAGCG  
ACGCCGCGTGAGTGATGAAGGACTTCGGTTCGTAAAGCTCTGTGCGAGGGAATAACACA  
ATGAAGGTACTCTGCGAGAAAGGGTTGGCTAACTTCGTGCCAGCAGCCGCGGTAAGACGA  
GGGACCCTAGCGTTGTTTCGGAATCATTGGGCGTAAAGCGGGTGTAGGTGGCTTTGTGAGT  
CAGATGTGAAAGCCCAGGGCTCAACCCTGGAAGTGCATTTGGTACTGCGAAGCTTGAGTG  
CTGGAGAGGTTACTGGAATTCCTGGTGTAGTGGTGAATACGTAGATATCAGGAGGAATA  
CCGGAGGCGAAGGCGGGTAACTGGACAGACACTGACACTCAAACCCGAAAGCGTGGGGAT  
CAAACAGGATTAGATACCCTTGTAGTCC

>Otu9072

CCAGCCTACGGGTGTCAGCAGCTAAGAATATTCCACAATGGACGAAAGTCTGATGGAGCG  
ACGCCGCGTGAGTGATGAAGGCCTTCGGGTGTAAAGTCCCTTTCGTGCGGGAAGATCTTT  
CTGCCGGTTAATAATCGGCGGAATCGACTGTACCGCAGGAAGAAGCCCCGGCTAATTACG  
TGCCAGCAGCCGCGGTAATACGTATGGGGCGAGCGTTATTCGGATTTATTGGGCGTAAAG  
GGTATGCAGGGGGCCTGTAAAGTCGGGAGTGAATTTCTAAGCTCAACTTAGAAATTGCT  
TTCGATACTGGCAGGCTAGAGTTTGGCAGAGGAGAATGGAATTCAGGTGTAGGGGTGAA  
ATCTGTAGATATCTGGAAGAACACCAGTGGTGAAGACGATTCTCTGGGCCAAAAGTACC  
CTCAGATACGAAAGCCAGGGGAGCAAACGGGATTAGATACCCCAGTAGTCC

>Otu9075

CCAGCCTATGGGGTGCACCAGTCGAGAATTTTTCTCAATGGGCGAAAGCCTGAAGGAGCG  
ACGCCGCGTGGGGGATGAATGGCTTCGGCCCGTAAACCCCTGTCATTTGCGAACAAATTG  
ACTCGCTTAACACGTGTGTCAATTGATTGTAGCGAAAGAGGAAGGGACGGCTAACTCTGTG  
CCAGCAGCCGCGGTAATACAGAGGTCCCAAGCGTTGTTTCGGATTCACTGGGCGTAAAGGG  
TGCGTAGGTGGCGAAGTAAGTCGGATGTGAAATCTCCGAGCTCAACTCGGAACTGCATT  
GGAACTACTTTGCTTGAGGGTTGGAGGGGGGACTGGAATACTTGGTGTAGCAGTGAAAT  
GCGTAGATATCAAGTGGAACACCAGTGGCGAAGGCGAGTCCCTGGACAACTCCTGACACT  
GAGGCACGAAAGCTAGGGGAGCAAACAGGATTAGAGACCCCAGTAGTCC

>Otu9083

CCAGCCTACGGGTGGCTGCAGTGGGGAATATTGGACAATGGGGGAAACCCTGATCCAGCC  
ATGCCGCGTGAGTGATGAAGGCTTTAGGGTTGTAAAGCCCTTTCACCGATGAAGATAATG  
ACGGTAGTCGGAGAAGAAGCCCCGGCTAACTTCGTGCCAGCAGCCGCGGTAATACGAAGG  
GGGCTAGCGTTGTTTCGGAATTACTGGGCGTAAAGCGAGCGTAGGTTGCTCGACAAGTCAG  
TGGTGAAATCCCAGAGCTTAACTCTGGAAGTCCATTGAACTGTGAGCTGGAATCTCA  
GAGGGGGTAGCGGAATTCCAAATGTAGGGGTGAAATCCGTAGATATTTGGAGGAACACCG  
GTGGCGAGGGCGGCTACCTGGATGAGTATTGACACTGAGGCTCGAAAGCGTGGGGATCAA  
ACAGGATTAGAAACCCGGGTAGTCC

>Otu9086

CCAGCCTATGGGTGGCTGCAGCAACGAATCTTCCCCAATGGCGAAAGCCTGAGGGAGCGA  
CGCCGCGTGAGGACGAAGTACTTCGGTATGTAAACTCCTGTTAGGGTTACGAAAGCGTA  
AGGGGCTAATACCCTCTGAGTTGATCTAATCCAGAGAAAGGGACGGCTAACTCTGTGCCA  
GCAGCCGCGGTAATACAGAGGTCCCAAGCGTTACTGAGAATCACTGGGTTTAAAGGGTGC  
GTAGGTGGTCTGTTAAGTTCCCTGTGAAATCCCCGGGCTCAACCCGGGAACGGCTGGGAA  
TACTGGCAGACTTGAGGCCAGTATGGGTCACTGGAAGTACGGTGGAGCGGTGAAATGCG  
TAGATATCGTCAGGAACGCCGGTGGTGAAGACGGGTGACTGGGCCGGTTCTGACACTGAG

GCACGAAAGCGTGGGGAGCGAACGGGATTAGAAACCCCTTGTAGTCC

>Otu9089

CCAGCCTCGGGGTGCTGCAGTAACGAATCTTCCGCAATGGGCGAAAGCCTGACGGAGCGA  
CGCCGCGTGCAGGACGAAGTCCTTCGGGATGTAAACTGCTGTCAGGGGTAGAAAGTTCT  
GATCAACCCCAGAGGAAGGCATGGCTAACTCTGTGCCAGCAGCCGCGGTAAAGACAGAGGT  
GCCAAGCGTTAGGCGGAATCACTGGGCTTAAAGCGTGTGTAGGCGGATGCCTAAGTACCT  
TGTGAAATCCACGGCTCAACCGTGGAAGTGTGGGTATACTGGGTGTCTTGAGCCATTC  
AGGGGCGACTGGAACAAACGGTGAGCGGTGAAATGCGTAGATATCGTTTTGAACGCCAAA  
GGTGAACAGGTCGCTGGGGATGTGCTGACGCTGAGACACGAAAGCCAGGGGAGCAAAC  
GGGATTAGATACCCCTGTAGTCC

>Otu9095

CCAGCCTATGGGGGGCTGCAGTCGGGAATTTTTTCACAATGGGCGCAAGCCTGATGGAGCG  
ACGCCGCGTGGGGGATGAATGGCTTCGGCCCGTAAACCCCTGTCATTTGCGAACAAAGTTG  
GTTCAACTAATACCTGAACCATTTGATAGTAGCGAAAGAGGAAGGGACGGCTAACTCTGTG  
CCAGCAGCCGCGGTAATACAGAGGTCCCAAGCGTTGTTTCGGATTCACTGGGCGTAAAGGG  
TGCGTAGGTGGTGAGGTAAGTCGGATGTGAAATCTCCGAGCTCAACTCGGAAACTGCATT  
GGAAACTACCTTGCTCGAGGGTTGGAGGGGGGACTGGAATGCTTGGTGTAGCAGTGAAAT  
GCGTAGATATCAAGCGGAACACCAGTGGCGAAGGCGAGTCCCTGGACAACCTCCTGACACT  
GAGGCACGAAAGCTAGGGGAGCAAACAGGATTAGAAACCCCAAGTAGTCC

>Otu9097

CCAGCCTATGGGTGGCTCCAGTGGGGAATCTTTCGCAATGGACGAAAGTCTGACGCAGCC  
ACGCCGCGTGAGTGAAGAAGGCCTTCGGGTGTAAAGCTCTGTGCGAAGGGACAAAACT  
ATGTGGGTAAATAGCCACGTACTTGATGGTACCTTTAAAGGAAGCACCGGCTAACTTCG  
TGCCAGCAGCCGCGGTAATACGAAGGGTGCAAGCGTTGCTCGGAATTATTGGGCGTAAAG  
GGTAGGTAGGTGGTTACGTATGTCTGAGGTGAAATCCCTGAGCTTAACTCAGGAAGTGCC  
TTGGAACGGCGTAACTAGAGTATTGGAGAGGTTTCGTGGAATTCCCAGTGTAGCGGTGAA  
ATGCGTAGAGATTGGGAGGAACACCAGAGGCGAAGGCGGCGAACTGGACAATTACTGACA  
CTGAACTACGAAAGCGTGGGGAGCAAACAGGATTAGATACCCGTGTAGTCC

>Otu9107

CCAGCCTACGGGTCGCTGCAGTGGGGAATACTGGACAATGGGCGAAAGCCTGATGGTGCG  
ACGCCGCGTGAGGGGCGAAGGCCTTCGGGTGTAAACCTCTGTACCCGGGGAAGAAACGC  
TACATTTTAATAGAATGTAGCCTGACTTAACCCGGAGAAGAAGCAGTGGCTAACTCTGTG  
CCAGCAGCCGCGGTAATACAGAGACTGCAAGCGTTATTTCGGATTCACTGGGCGTAAAGGG  
TGCGCAGGCGGCCAGGTGTGTGAGGTGTGAAAGCCCGGGGCTTAACCCCGGAATTGCGCC  
TGAAACTACTTGGCTAGAGCATTGGAGAGGGTAGCAGAATTCACGGTGTAGCAGTGAAAT  
GCGTAGATATCGTGAGGAATACCAGAGGCGAAGGCGGCTACCTGGACAATTGCTGACGCT  
CAGGCACGAAAGCGTGGGGAGCAAAGGGATTAGAAACCCGAGTAGTCC

>Otu9108

CCAGCCTATGGGAGGCTGCAGCTGAGAATCTTCCACAATGGACGAAAGTCTGATGGAGCG  
ACATCGCGTGAAGGATGAAGGCCTTCGGGTGTAAACTTCTTTTGACGCTGACGAATAAC  
TGACGGTAAGCGTCGAATAAGCCTCGGCTAACTACGTGCCAGCAGCCGCGGTAATACGTA  
GGAGGCAAACGTTGTTTCGGATTCACTGGGCGTAAAGGGTGAGTAGGCGGAAGTGTAAAGTC  
ATTGGTGAAAGACTGGGGCTTAACCCAGGAACGCCTTTGATACTACAGTTCTCGAGTGC  
GATAGAGGATGGTGGAATTCCTGGTGTAAAGGGTGGAATCTGTAGATATCAGGAGGAACAT  
CGATGGCGAAGGCAGCCATCTGGGTGCGAACTGACGCTGAATCACGAGAGCTGGAGGAGC  
AAACGGGATTAGAAACCCCTGTAGTCC

>Otu9110

CCAGCCTATGGGGTGCTGCAGCAACGAATATTGGACAATGGACGCAAGTCTGATCCAGCG  
ACGCCGCGTGTGGGATGAAGTCCTTCGGGATGTAAACCACTGTCAGGGGTAACCAATCAA  
TTGAGGTATCCCAGAGGAAGCCACGGCTAACTCCGTGCCAGCAGCCGCGGTAAGACGGAG  
GTGGCGAGCGTTACTCGGATTCACTGGGCTTAGAGCGGGTGCAGGCGGCCATATAAGCCT  
GGAGTGAATTCCTTCGGCTCAACCGAGGAATTGTTTCGGATACTGTATGGCTTGAGGCAA  
GCAGGGGTGAGTGAACGTTTGGTGTAGCGGTGAAATGCGTAGATATCAAACGGAACGCC  
GGTGGTGAAGACGGCTGACTGGGCTTGACCTGACGCTCAGACCCGAAAGCGTGGGGAGTG  
AACCGGATTAGAAACCCCTGTAGTCC

>Otu9113

CCAGCCTACGGGATGCAGCAGTGGGGAATTTTGGACAATGGGCGAAAGCCTGATCCAGCA  
ACGCCGCGTGGAGGATGAAGGTCTTCGGATTGTAAACTCCTTTTGAGGGGAACGAATAAA

TTGACGGTACCCCTAGAAAAAGCCACGGCTAACTACGTGCCAGCAGCCGCGGTAATACGT  
AGGTGGCGAGCGTTACTCGGAATTACTAGGCGTAAAGAGCATGTAGGTGGTTAGGTAAAGT  
CTGTGGTGAAATTCCTCCGGCTTAACTGGAGGGGGTTTACAGATACTACCTGGCTTGAGTG  
TGGAAGGGATGGCGGAATTCCTGGTGTAGCGGTGAAATGCGTAGATATCAGGAGGAACA  
CCGATGGCGAAGGCGGCTATCTGGCCCAATACTGACACTGAGATGCGAAAGCTAGGGGAG  
CAAACAGGATTAGAAACCCAGTAGTCC

>Otu9124

CCAGCCTACGGGTGGCTGCAGTGAGGAATATTGGTCAATGGACGGAAGTCTGAACCAGCC  
ATCCCGCGTGCAGGATGAAGGCGCTACGCGTTGTAACTGCTTTTGTACCAGAGAAAACC  
TATCTACGTGTAGATAGCTGATAGTATGGTAAGAATAAGCATCGGCTAACTTCGTGCCAG  
CAGCCGCGGTAATACGGAGGATGCAAGCGTTATCCGGATTCATTGGGTTTAAAGGGAGCG  
TAGGCGGTTTTATAAGTCAGTGGTGAAATCTCGTTGCTTAACAACGAACGTGCCATTGAT  
ACTGTAGAACTTGAGTACAGATGATGTTGGCGGAATGTGTCATGTAGCGGTGAAATGCTT  
AGATATGACACAGAACACCGATTGCGAAGGCAGCTGACAAAACGTAACTGACGCTGAGG  
CACGAAAGCGTGGGGATCAAACAGGATTAGAAACCCCCGTAGTCC

>Otu9127

CCAGCCTATGGGTGGCACCAGGCGCGAAACCTCTACAATGCACGAAAGTGTGATAGGGGA  
ATCCCAAGTGCTTACACAAAGTGTAGGCCTTTGCCAAGAGTAAATATCTTGGCGAATAAG  
TGGTGGGAAAGACTGGTGCCAGCAGCCGCGGTAACCCAGCGCCACAAGTGGCATAACACA  
TTTATTGGGCCTAAAGCGTCCGTAGCCGGTCGGTTAAATCTCTTGTGAAATCATGGTGCT  
TAACTCCATGGCGTGCAGGAGACACTGACTGACTTGGAACCGGGAGGAGTCAGAGGTATT  
CTAGGGGGAGCGGTAAAATGTTATAATCCCTAGAGGACCACCTGTGGCGAAGGCGTCTGA  
CTAGAACGGATTCGACGGTGAGGGACGAAGGCCAGGGGAGCGAACCAGGATTAGAGACCC  
CGTAGTCC

>Otu9146

CCAGCCTACGGGTCGCAGCAGTGGGGAATCTTGGACAATGGGCGCAAGCCTGATCCAGTA  
ATATTTATTGTGCGAAAGAGAAGGCTAGCTTCGTAAAGCACTTTTGTAAACGAAAATAAT  
GATAAAAGTTTAAGTAATTTAGTCCCGGCTAATTTTCGTGCCAGCAGCCGCGGTAATACGG  
GAGGGGCAAGCGTTATTCATCATAAGCGGGCGTAAAGGGTGAGTAGGCAATGGTAGATAA  
TTAACAAGAAATAACAAAGTACACTTTGTTGCTTGTGTATTAGAAACTAGTTAATAGAGA  
CGACGAAATGGGGTTAGAATTACTAATGGAAAGGTAAAATATATTGATATTAGTACGAAT  
GCCGAAGGCGAAGGCAAATTTTATTCTAGTCTAACGCTGAGGTGCGAAAGCTTGGAATC  
AAACGGGATTAGATACCCAGTAGTCC

>Otu9149

CCAGCCTATGGGGCGCTCCAGGTGCGAAACCTTTACAATGCGCGAAAGCGTGATAAGGGA  
ACTCTGAGTGGCAGCCGGCTTTTGCCAACTGTCTTTTGGCGAACTTAAACGTTTCGCAGA  
ATAAGTTCTGGGTAAAGACCAGTGCCAGCCGCCATGTGCACTTGACAAATGCGCACGGTAC  
GCGGTAATACTGGCAGAACGAGTGGTGCCACGAATATTGGGTCTAAAGAGACCGTAGCT  
GGCCCGTTAAGTCCACTGTGAAATCTTGGGGCTCAACCTCAAGGCGTGACGCGGATACTG  
GCGGGCTTGAGAGCGGGGAGGTCAGGGGTACTTACGGGGTAAGAGTAAAATCTGTTGAT  
CCTGTAAGGACCACAGTGCGGAAGGCGCCTGACCGAAACGCGTCTGACAGTGAGGGTCG  
AAGGCTAGGAGAACGAATCGGATTAGATACCCAGTAGTCC

>Otu9160

CCAGCCTATGGGGTGCTGCAGTGAGGAATCTTGGGCAATGAACTAAAGTTTGACCCAGCA  
ATATTTTCATGGATGATGACAGCTGCTATAGCCGTAAAGTTCGTTTATAAAAGAAGATAAT  
GACTGTATTTTATTTAAAGTCCCGGCTAATATTTGTGCCAGCAGCCGCGGTAAGACAAAT  
GGGCAAGCGTTATTCATAATTATTGGGCGTAAAGGGCACGTAGGCTGCTAAATCAATCA  
AAGATAAAATACTAGAATAAAGTTTTAGAAACATTATTGATATTGTTTAGCTCAGAGTTA  
AGAACAGGTTGAAAGAATTTTAAATGGAGGGGTAAAATCCATAGATATTAAGAATAAC  
CAACAGTGAAGACATTTGGCTAGTTTTAACTGACGCTGAGGTGCGAAAGCTTAGGTATCA  
AACAGGATTAGATACCCCTGTAGTCC

>Otu9162

CCGCCTATGGGGCGCACCAGCTAGGAATATTGCGCAATGGGCGAAAGCCTGACGCAGCAA  
CGCCGCGTGCGGGATGACGGCCTTCGGGTGTAAACCGCTTTTAGTAAGAACGATTATGA  
CGGTACTTACAGAAAAAGGTCCGGCTAACTACGTGCCAGCAGCCGCGGTAATACGTAGGG  
ACCGAGCGTTGTCCGGATTTATTGGGCGTAAAGAGCTCGTAGGCGGCACGGTAAGTCAGA  
AGTGAAAATGCAAGGCTTAACCTTGCAATTGCTTTTGATACTGCCGAGCTTGAGTATGGCA  
GGGAAAAGGGAATTCACGTGTAGCGGTGAAATGCGCAGATATGTGGAGGAACACCAGT

GGCGAAGGCGCTTTTCTGGGCCATTACTGACGCTGAGGAGCGAAAGCGTGGGGAGCGAAC  
AGGATTAGATACCCTCGTAGTCC  
>Otu9164  
CCAGCCTACGGGGTGCAGCAGACGAGAATATTCGACAATGGGCGAAAGCCTGATCGAGCG  
ACGCCGCGTGAGGATGAAGTCTTCGGAATGTAACTCCTTTTGCCAGGGAAAAAGTTA  
TTGATTGTACCTGGAGAATAAGAGTTGCTAACTCGTGCCAGCAGCAGCGGTAATACGA  
GTGCCTCAAGCGTTATCCGAAATCATTGGGCGTAAAGGGTTTGTAGGTGGCCGTGTTAGT  
CTTGTGTTAAATTTACCGGCTCAACCGGTAAGCTGCATGGGAAACGGCATAGCTTCGAGG  
ACGGTAGAGGTCTCTGGTACTCATAGTGTAGCGGTGAAATGCGTTGATATTATGGGGAAC  
ACCAAAGCGAAGGCAAGAGACTGGACCGCTCCTGACACTGAAAAACGAAAGCGTGGGTC  
GCGAATGGGATTAGAGACCCGAGTAGTCC  
>Otu9165  
CCAGCCTACGGGTTGCACCAGTGGGGAATATTGGACAATGGGCGCAAGCCTGATCCAGCA  
ATGCCGCGTGTGTGAAGAAGGCCTGCGGGTTGTAAAGCACTTTCAGTGGGGAGGAAGGCC  
TAATGGTAAATAGCCATTAGGATTGACGTTACCCACAGAAGAAGCACCCGGCTAACTCTGT  
GCCAGCAGCCGCGTAATACAGAGGGTGCAGCGTTAATCGGAATTACTGGGCGTAAAGG  
GTGCGTAGGTGGTCCCTTAAGTTAGATGTGAAATCCCTGGGCTTAACCTGGGAATGGCAT  
TTAAGACTGAGGGCTAGAGTTTGGTAGAGGGAAGTGGAATTTCCGGTGTAGCGGTGAAA  
TGCGTAGATATCGGAAGGAACATCAGTGGCGAAGGCGACTTCCTGGACCGATATTGACAC  
TGAGGCACGAAAGCGTGGGGAGCGAACAGGATTAGATAACCCGAGTAGTCC  
>Otu9166  
CCAGCCTATGGGGCGCAGCAGTTTCGAATCATTCACAATGGGGGAAACCCTGATCCAGCG  
ACGCCGCGTGTGTGAAGAAGGCCTGCGGGTTGTAAAGCACTTTTAGTGGGGACAAAAAGC  
TACGGATTAATACTTCGTGGTCTTGATTTAACCCAAAGAAAAAGCACCCGGCTAACTCTGT  
GCCAGCAGCCGCGTAATACAGAGGGTGCAGCGTTAATCGGAATTACTGGGCGTAAAGC  
GTGCGTAGACGGTTTTTTAAGTCGGATGTGAAATCCCCGGGCTCAACCTGGGAATTGCAT  
TCGAGACTGGAAGGCTAGGGTGCAGGAAGAGGGAAGCGGAATTTCTGGTGTAGCGGTGAAA  
TGCGTAGATATCAGAAGGAACATCAGTGGCGAAAGCGGCTTCCTGGTCCAGCACCCGACGT  
TCAGGCACGAAAGCGTGGGGAGCAAACAGGATTAGAAAACCCCTTGTAGTCC  
>Otu9169  
CCAGCCTATGGGTCGCTGCAGTGGGGAATTTTGCAGCAATGGGCGAAAGCCTGACGCAGCG  
ACACCGCGTGAACGAAGAAGCCATTTGGGGTGTAAAGTCTGTGCGCTGGGAAGAAAAAA  
ATGACGGTACCAGCAAAGGAAGCATCGGCTAACTACGTGCCAGCAGCCGCGTAAGACGT  
AGGATGCAAGCGTTGTCCGGATTTATTGGGCGTAAAGAGTTCGTAGGCGGTTTGTAAAGT  
CTGACGTTAAAGATCAGGGCTCAACCCTGGGATTGCTTCGGATACTGGCAGACTGGAGTG  
TGGTAGAGGTAAGTGGAATTTCTGGTGTAGCGGTGAAATGCGTAGATATCAGGAAGAACA  
CCGGTGGCGTAGGCGGCTGACTGGATCGCAACTGACGCTGAGGAACGAAAGCTAGGGGAG  
CAAACAGGATTAGAACCCCAGTAGTCC  
>Otu9171  
CCAGCCTATGGGTTGCAGCAGTGGGGGATATTGGACAATGGGCGAAAGCCTGATCCAGCA  
ATACCGCGTGTGTGAAGAAGGCCTGCGGGTTGTAAAGCACTTTAGTGGGGGAAGAAGTTC  
ACGCAAGTGGATTGACGGTACCCCAAGAATAAGCACCGGCCAACTCTGTGCCAGCAGCCG  
CGGTAATACAGAGGGTGCAGCGTTAATCGGAATGACTGGGCGTAAAGGGCGCGTAGGCG  
GATAAGTGTGTTGGGTGTGAAATCCCCGAGCTCAACTCGGGAATTGCGTCCAAAAGTGT  
TATCTAGAGTGAAGTAGAGGTGAGTGGAATTTCCGGAGTAGCGGTGAAATGCGTAGATAC  
CGGAAGGAACACCAAGTGGCGAAGGCGGCTCACTGGACTTTTACTGACGCTGAGGCGCGAA  
AGCGTGGGGAGCAAACAGGATTAGAAAACCCCGTAGTCC  
>Otu9172  
CCAGCCTATGGGTCGCAGCAGTCGAGAATTTTTCTCAATGGGCGAAAGCCTGATCGAGCG  
ACGCCGCGTGATGGATGAAGTGCTTCGGCATGTAAACATCTTTTGTAGGCCAGAAAGCTA  
TTGATCAGCCTAAGAATAAGGAGTTGCTAACTCGTGCCAGCAGCAGCGGTAATACGAGT  
GCTCCAAGCGTTATCCGGAATCATTGGGCGTAAAGGGTGTGTAGGTGGTGTGTTAGTCT  
TCTGTTAAATTCTTCGGCTTAACCGGGGGCATGCAGGGGAAACGGCACAACTAGAGGATG  
CGAGAGGTATATGGAACATGAGTAGGGGTGAAATCCGTTGATATCATGGGGAACACC  
AAATGCGAAGGCAATATACTGGCGCACTCCTGACACTGAAACACGAAAGCGTAGGTAGCG  
AATGGGATTAGATAACCCGCGTAGTCC  
>Otu9182  
CCAGCCTACGGGTCGCAGCAGTGGGGAATCTTGCAGCAATGGGCGAAAGCCTGACGCAGCA

ACGCCGCGTGGAGGACGAAGGCTTTCTGAGTTGTAAACTCCTTTCAGCAGGGACGATAGT  
GACGGTACCTGCAGAAGAAGCACCGGCCAACTACGTGCCAGCAGCCGCGGTGATACGTAG  
GGTGAAGCGTTGTCCGGATTTATTGGGCGTAAAGAGCTCGTAGGCGGTTCGACAAGTCG  
GGTGTTAAACCCCCAGGCTCAACCTGGGGCCGCCACCCGAACTGTCTGTGACTAGAGTTT  
GGTAGGGGATCACGGAATTCCTGGTGTAGCAGTGAATGCGCAGATATCAGGAGGAACAC  
CAGTAGCGAAGGCGGTGATCTGGGCCAATACTGACGCTGAGGAGCGAAAGCGTGGGGAGC  
GAACAGGATTAGAAACCCTGGTAGTCC

>Otu9188

CCAGCCTATGGGGGGCAGCAGTGGGGAATCTTGGAACAATGGGGGCAACCCTGATCCAGCC  
ATGCCGCGTGAGTGAAGAAGGCCTTCGGGTGTAAAGCTCTTTCGGCAGGAACGAAATGG  
TTCGTGCTAATACCACGGAATGATGACGGTACCTGAAGAAGAAGCACCGGCTAACTACGT  
GCCAGCAGCCGCGTAATACGTAGGGTGCAGGCGTTAATCGGAATTACTGGGCGTAAAGC  
GTGCGCAGGCGGTTTCTTAAAGTCAGATGTGAAAGCCCAGGGCTTAACCTGGGAACTGCGT  
TTGAAACTGGGAGACTTGAGTGTGGCAGAGGGGGGTGGAATTCACGTGTAGCAGTGAAA  
TGCGTAGATATGTGGAGGAACACCGATGGCGAAGGCAGCCCCCTGGGCTAACACTGACGC  
TCATGCACGAAAGCTAGGGGAGCAAACAGGATTAGATACCCGAGTAGTCC

>Otu9195

CCAGCCTATGGGAGGCTGCAGTTGGGAATCTTGGAACAATGGGGGAAACCCTGATCCAGCC  
ATGCCGCGTGAGTGATGAAGGCCTTAGGGTGTAAAGCTCTTTCGCCGGGGACGATAATG  
ACGGTACCCGGATAAGAAGCTCCGGCTAACTTCGTGCCAGCAGCCGCGTAATACGAAGG  
GGGCTAGCGTTGTTTCGAATTACTGGGCGTAAAGCGCGCGCAGGCGGTCTCCAAGTCAG  
TGGTGAAAGCCCGGAGCTCAACTTCGGAATTGCCATTGAAACTGTTGAACTTGAGTACGA  
GAGAGGTGAGTGGAATTCACAGTGTAGAGGTAAAATTCGTAGATATTCGCAAGAACACCA  
GTGGCGAAGGCGGCTCACTGGCCCCGAACTGACGCTGAGACGCGAAAGCGTGGGGAGCAA  
ACAGGATTAGAAACCCCCGTAGTCC

>Otu9196

CCAGCCTATGGGAGGCAGCAGCTAGGAATCTTGGAATGCGCGAAAGCGTGACCCAGCAA  
CGCCGCGTGGGCGATGAAGGCCTTCGGGTGTAAAGCCCTTTTGAGGGGACGATAGTGA  
CGGTACCTTGCGAATAAGCCACGGCTAACTACGTGCCAGCAGCCGCGTAATACGTAGGT  
GGCAAGCGTTGTCCGGATTTACTGGGCGTAAAGGGCGTGACGGCGGTCTGTTAAGTTCAG  
GGTGAAAGCTCCCGGCTCAACTGGGAGAGGTCCCTTGATACTGGCAGACTTGAGGGAGGT  
AGAGGAGAGTGGAATTCACGGTGTAGTGGTGATATGCGTAGATATCGGGAGGAACACCAG  
TGCGCAAGGCGGCTCTCTGGGCCTTTCCTGACGCTGAGACGCGAAAGCGTGGGGAGCGAA  
CCGGATTAGAGACCCTGGTAGTCC

>Otu9197

CCAGCCTATGGGGGGCACCAGTGGGGAATGTTCGCAATGGGCGCAAGCCTGACGACGCA  
ACGCCGCGTGGAGGATGAAGACTTTCGGGTGTAAACTCCTGTGCAATGGGACGAAAAAG  
ACGCGGGTTAACAACCTGTGTTTCTGACGGTACCGTTAAAGGAAGCCCCGGCTAACTCCG  
TGCCAGCAGCCGCGTAATACGGGGGGGGCAAGCGTTGTTCGGAATTACTGGGCGTAAAG  
GGCTCGTAGGCGGCCAACTAAGTCAGACGTGAAATCCCTCAGCTTAACTGAGGAACTGCG  
TCTGATACTGGATGGCTTGGAATTCGGGAGAGGGATGCGGAATTCAGGTGTAGCGGTGAA  
ATGCGTAGATATCTGGAGGAACACCGGTGGCGAAGGCGGCATCCTGGACCGATATTGACG  
CTGAGGAGCGAAAGCCAGGGGAGCAAACGGGATTAGAAACCCCCGTAGTCC

>Otu9198

CCAGCCTACGGGTCGCTCCAGTCGAGAATATTCGACAATGGGCGAAAGCCTGATCGAGCG  
ACACCGCGTGACAGGATGAAGGCCTTCGGGTGTAAACTGCGGTAGTAGCATAACAATGCA  
AATGAGTGTGCTACGGAAAGAGGTGGGTAACCTACGTGCCAGCACCAGCGGTAATACGTAG  
ACCTCAAGCGTTATCCGGATTTATTGGGCGTAAAGAGCATGTAGGATGTTTTGCGCGTCT  
TTTGTTAAAGCCCAGGGCCTAACCTGGAGATGCAAGAGATACGGCAGGACTAGAGGAGG  
TTAGAGGTGCATGGAATCACGGTGTAGGGGTGAAATCCGTTGATATCGTGGGGAAACACC  
AAGGGCGAAGGCAGTGCCTGGGACCTTCTGACTCTGAGATGCGAAAGCGTGGGGAGCA  
AAAAAGATTAGAGACCCTGTAGTCC

>Otu9200

CCAGCCTATGGGGGGCAGCAGTGGGGAATATTGGACAATGGGGGCAACCCTGATCCAGCA  
ATGCCGCGTGAGTGATGAAGGCCTTAGGGTGTAAAGCTCTTTTACCCACGACGATGATG  
ACGGTAGTGGGAGAATAAGCCCCGGCTAACTTCGTGCCAGCAGCCGCGGTAATACGAAGG  
GGGCTAGCGTTGTTTCGGAGTTACTGGGCGTAAAGGGCGCGTAGGCGGGCGCACCAAGTCAG  
CGTGAAAGCCCTGGGCTCAACCCGGGAATTGCGCTTGAGACTGGTGTGCTTGAGTACGG

GAGAGGATAGTGGAATTCCTAGTGTAGAGGTGAAATTCGTAGATATTGGGAAGAACACCG  
GTGGCGAAGGCGGCTATCTGGACCGTAACTGACGCTGAGGCGCGAAGGCTAGGGGAGCAA  
ACAGGATTAGATACCCCCGTAGTCC

>Otu9202

CCAGCCTATGGGTCGCTGCAGTGGGGAATCTTGGACAATGGGGGAAACCCTGATCCAGCC  
ATGCCGCGTGAGTGATGAAGGCCTTAGGGTTGTAAACTCTTTTCGGCGGGGACGATAATG  
ACGGTACCCGGAGAAGAAGCTGCGGCTAACTACGTACCAGCAGCCGCGTAATACGTAGG  
CAGCAAGCGTTGTTTCGGAATTACTGGGCGTAAAGAGTGTGTAGGCGGTTTTCTATGTTTCG  
GTGTGAAATCTCCCGGCTTAACTGGGAGGGTGCGCCGAAAACCTGGAAGGCTTGAGTATGG  
GAGAGGAGAGCGGAATTCCTGGTGTAGCGGTGAAATGCGTAGATATCAGGAGGAACACCT  
GCGGTGTAGACGGCTTTCTGGACCATCACTGACGCTGAGACACGAAAGCGTGGGTAGCAA  
ACAGGATTAGAAACCCGGGTAGTCC

>Otu9203

CCAGCCTATGGGGGGGCTGCAGTGAGGAATATTGCTCAATGGGCGAAAGCCTGAAGCAGCG  
ACGCCGCGTGAGGGATGAAATCCGTTAGGATGTAAACCTCTTTTCTAAGGAAGAATATC  
CTGATCAATCAGGAAGTGACTGTACTTTAGGAATAAGGATCGGCCAACTACGTGCCAGCA  
GCCGCGGTAATACGTAGGATCCGAGCGTTGTCCGGAATTACTGGGTGTAAAGGGTCCGCA  
GGTGGGCAAGCAAGTCGGTGGTGAATCTCTCCGCTCAACGGAGAACTGCCCTCGATAC  
TGCTTGTCTTGAGTTCGAGAGAGGGTAACGGAATTCATGGTGTAGCGGTGAAATGCGTAG  
ATATCATGAAGAACACCGGTGCGGTAGGCGGTTACCTGGCTCGCAACTGACACTCAGGGA  
CGAAAGCATGGGTAGCAAACAGGATTAGAAACCCGGGTAGTCC

>Otu9209

CCAGCCTACGGGAGGCAGCAGTCGAGGATCTTCGGCAATGGGCGCAAGCCTGACCGAGCG  
ACGCCGCGTGTCGATGAAGGCCTTCGGGTGTAAAGCACTGTTCGAGGGGGAGAAAAGCC  
CGCAAGGGTCTGATCTATCCCTGGAGGAAGCACGGGCTAAGTTCGTGCCAGCAGCCGCGG  
TAAGACGAACCGTGCGAACGTTGTTTCGGAATCACTGGGCTTAAAGGGCGCGTAGGCGGGC  
CATCAAGTCCGTGGTGAAATACTTCGGCTTAACCGGAGAAAGTGCTGCGGATACTGGTGGT  
CTCGAGGGGGGTAGGGGCATGTGGAACCTTCGGGTGGAGCGGTGAAATGCGTAGATATCGG  
AAGGAACGCCGTGGCGAAAGCGACGTGCTGGACCCCATCTGACGCTGAGGCGCGAAAGC  
CAGGGGAGCAAACGGGATTAGAAACCCGCGTAGTCC

>Otu9211

CCAGCCTATGGGACGCAGCAGTGGGGAATATTGGACAATGGACGAAAGTCTGACGCAGCC  
ACGCCGCGTGAGTGAAGAAGGCCTTCGGGTGTAAAGCTCTGTTCGAGGGGACGAAAAGC  
ATTAGGGTTAACAGCCCTAGTGCCTGACGGTACCCTTAAAGGAAGCACCGGCTAACTCTG  
TGCCAGCAGCCGCGGTAATACAGAGGGTGCAAGCGTTGCTCGGAATCATTGGGCGTAAAG  
GGCAAGTAGGTGGTCTCATTTGTCTAGGGTGAAATCCTTGAGCTTAACTCAAGAAGTGCC  
CTAGAAACGGTGAGACTCGAGTTCTGGAGAGGGTCTGTGGAATTCCCGGTGTAGCGGTGAA  
ATGCGTAGAGATCGGGAGGAACACCAGAGGCGAAGGCGGCGACCTGGACAGATACTGACA  
CTCAACTGCGAAAGCGTGGGGAGCAAACAGGATTAGATACCCTAGTAGTCC

>Otu9215

CCAGCCTATGGGTCGCGAGCAGTGAGGAATATTGCACAATGGGCGAAAGCCTGATGCAGCG  
ACGCCGCGTGAGGATGAAGGTCTTCGGATTGTAAACTCCTGTTAAGTGGGAAAAAGAA  
TTGCTCTGAATAGGAGCAAGAGATGATTGTACCACTAGAGAAAGCACCGGCTAACTTCGT  
GCCAGCAGCCGCGGTAATACGAGGGGTGCAAACGTTATTTCGGAATCATTGGGCGTAAAGG  
GTGCGTAGACGGCAAATCAAGTCAGTTATTAAATCTTCTAGCTCAACTAGAAATCTGTGG  
CTGAAACTAGCTTGCTTGAGTATGGAAGAGAGAAGCGGAATTCTCGGAGTAGCGGTAAAA  
TGCGTAGATCTCGAGAGGAACACCGATGGCGAAGGCAGCTTCTTGGTCCATTTCTGACGT  
TGAGGCACGAAAGCGTGGGGAGCAAACAGGATTAGATACCCTAGTAGTCC

>Otu9217

CCAGCCTACGGGACGCACCAGTGGGGAATATTGGGCAATGGGCGAAAGCCTGACCCAGCC  
ACGCTGCGTGAGTGATGAAGGCCTTCGGGTGCTAAAGCTCTGTGGGGAGGGACGAACAAG  
CCTGGTGCTAATATCACCGGGCCCTGACGGTACCTCCTTAGCAAGCACCGGCTAACCTTG  
TGCCAGCAGCCGCGGTAATACAGGGGGTGCAAACGCTGCTCGGAATCATTGGGCGTAAAG  
CGCACGTAGGCGGTTTCGTTATGTTCGGATGTGAAAGCCCTCGGCTTAACTGAGGAAGTGCA  
TCCGAAACTGGCGAGCTAGAGTACTAAAGAGGGTTCGCGGAATTCCCGGTGTAGAGGTGAA  
ATTCGTAGATATTGGGAAGAACACCGGTGGCGAAGGCGGCTCACTGGCTCATATCTGACG  
CTCAGGCGCGACAGCGTGGGGATCAAACAGGATTAGATACCCAGTAGTCC

>Otu9221

CCAGCCTATGGGTGGCACCAGTGGGGAATCTTGCGCAATGGGCGAAAGCCTGACGCAGCA  
ACGCCGCGTGAGGACGAAGGCTTTCTGAGTTGTAAACTCCTTTTCAGCAGGGACGATTGT  
GACGGTACCTGCAGAAGAAGCACCGGCCAACTACGTGCCAGCAGCCGCGGTGATACGTAG  
GGTGAAGCGTTGTCCGATTATTGCGGTAAAGGGTGCCTAGGCGGCTTTTTAAGTCA  
GAGGTGAAATCCTGGAGCTCAACTCCAGAAGTGCCTTTGATACTGAAGAGCTTGAGTCCG  
GGAGAGGTGAGTGGAACTGCGAGTGTAGAGGTGAAATTCGTAGATATTCGCAAGAACACC  
AGTGGCGAAGGCGGCTCACTGGCCCGGTACTGACGCTGAGGTGCGAAAGCGTGGGGAGCA  
AACAGGATTAGATACCCTCGTAGTCC

>Otu9222

CCAGCCTATGGGGGGCACCAGTGGGGAATCTTGACAATGGGGGCAACCCTGATCCAGCG  
ATGCCGCGTGAGGTAAGAAGGCCTTCGGGTGTAAAGCCCTTTAGGCTGGGAAGAAGAAT  
GCGGGATGAATAATCCTGTATTTTGACGGTACCAGCAGAATAAGCACCGGCAAACTCTGT  
GCCAGCAGCCGCGTAATACAGAGGGTGCAGCGTTAATCGGATTTACTGGGCGTAAAGG  
GCGCGTAGGCGGTCAAATGAGTGTGATGTGAAAGCCCCGGGCTTAACCTGGGAAGTGCAT  
CGCAAACGATTTGACTGGAGTAGATGAGAGGGTGGTGGAAATTTCCGGTGTAGCGGTGAAA  
TGCGTAGAGATCGGAAGGAACGTCAATGGCGAAGGCAGCCACCTGGCATCATACTGACGC  
TGAGGCGCGAAAGCGTGGGGAGCGAACAGGATTAGAGACCCTAGTAGTCC

>Otu9225

CCAGCCTATGGGTCGCTGCAGTAAGGAATATTGGTCAATGGACGCAAGTCTGAACCAGCC  
ATGCCGCGTGAGGATGAAGGTCCTCTGGATTGTAAACTCTTTTATTTGGGAAGAAATG  
CATTTTTTCTAAAGTGCTTGACGGTACCAGATGAATAAGCACCGGCTAACTCCGTGCCAG  
CAGCCGCGGTAATACGGAGGGTGCAAGCGTTATCCGGATTTACTGGGTTTAAAGGGTGCG  
CAGGCGGGTACGTAAGTCAGTGGTGAATCTCTAGGCTTAACCTGGGAATTGCCATTGAT  
ACTATATATCTTGAATGCTGTGGAGGTAAGCGGAATATGTCATGTAGCGGTGAAATGCTT  
AGAGATGACATAGAACACCTATTGCGAAGGCAGCTTACTACGCAGAGATTGACGCTCATG  
CACGAAAGCGTGGGGATCAAAACAGGATTAGATACCCCTGTAGTCC

>Otu9227

CCAGCCTACGGGGTGCAACCAGTCGAGAATTTTTCTCAATGGGCGAAAGCCTGAAGGAGCG  
ACGCCGCGTGGGGGATGAAGGGCTTCGGCTCGTAAACCCCTGTCATTTGCGAACAAACCC  
TGTCATTTAACAGACGACAGGCTGATTGTAGCAGAAGAGGAAGGGACGGCTAACTCTGTG  
CCAGCAGCCGCGTAATACAGAGGTCCCAAGCGTTGTTTCGATTCACTGGGCGTAAAGGG  
TGCGCAGGTGGCAAGGTAAGTTTGATGTGAAATCTCCGGGCTTAACCCGAAACTGCATT  
GAATACTCTCTTGCTAGAGGATTGGAGGGGGGACTGGAATACTTGGTGTAGCAGTGAAT  
GCGTAGATATCAAGTGGAACACCAGTGGCGAAGGCGAGTCTCTGGACATTTCTTGACGCT  
GAGGCACGAAAGCCAGGGGAACGAACGGGATTAGAAACCCTTGTAGTCC

>Otu9230

CCAGCCTATGGGATGCTGCAGTCGAGAATTTTTCACAAATGGGCGAAAGCCTGATGGAGCG  
ACACCGCGTGGGGGATGAAGGGCTTCGGCTCGTAAACCCCTGTCATGCATGGGCAATGCT  
GTTGACCTAACACGTCAGCAGTTGATAGTAATGCAAGAGGAAGGGACGGCTAACTCTGTG  
CCAGCAGCCGCGTAATACAGAGGTCCCAAGCGTTGTTTCGATTCACTGGGCGTAAAGGG  
TGCGTAGGTGGCAAGGTAAGTTCGATGTGAAATCTCCGAGCTCAACTCGGAAATGGCATT  
GAATACTCTCTTGCTAGAGGGTCGGAGGGGAGACTGGAATTCTCGGTGTAGCAGTGAAT  
GCGTAGATATCGAGAGGAACACCAGTGGCGAAGGCGAGTCTCTGGACGACAACCTGACACT  
GAAGCACGAAAGCTAGGGGAGCAAACAGGATTAGATACCCGGGTAGTCC

>Otu9238

CCAGCCTATGGGGCGCTGCAGTGGGGAATATTGCGCAATGGGCGAAAGCCTGACGCAGCG  
ACGCCGCGTGAAGGATGAAGGCCTACGGGTGTAAACTTCTGTTAAGCGGGAAGAAAAC  
CTATCTCTAATACAGATAGATATGACGGTACCGCTAGAGAAAGCACTGGCTAAACTCGTG  
CCAGCAGCCGCGTAATACGAGTGGTGAAGCATTATTTCGGAATCATTGGGCGTAAAGGG  
TGCGTAGGTTGTATACTAAGTCTGTTGTTAAATTTCTCGGCCTAACCGGGAACCTGCAGT  
GGAACTAGTGTACTAGAGGATGGAAGAGAGAAGTGAATTTCTCGGAGTAGCGGTAAAT  
GCGTAGATCTCGAGAGGAACACCGATGGCGAAGGCAGTCTCTGGACGACAACCTGACACT  
GATGCACGAAAGCGTGGGGAGCAAACAGGATTAGAAACCCCGGTAGTCC

>Otu9240

CCAGCCTACGGGGGGCACCAGCCAAGAACATTCGACAATGGGCGAAAGCCTGATCGAGCG  
ATACCGCGTGAGGATGAAGCGCTTCGGCGCGTAAACACCTTTTATGGAGGAGGAAGTTA  
TTGACGTTACTCCATGAATAAGGGGCTCCTAACTCTGTGCCAGCAGGAGCGGTAATACAG  
AGGCCCCGAGCGTTACCCGGAATTACTGGGCGTAAAGGGTGTGTAGGTGGTCTGTAGT



CGTCCGTCAAAAACCTGGGGCTCAACCCCAGATCCGCGGGCGAAACGGCACGACTCGAGGG  
CGTGAGAGGTACATGGAACCTCATGGTGTAGGGGTGAAATCCGTTGATATCGTGGGGAAACA  
CCGAAAGCGAAGGCAATGTACTGGCGCGTTCTTGACACTGAAACACGAAAGCGTGGGTAG  
CGAACGGGATTAGAGACCCTAGTAGTCC

>Otu9254

CCAGCCTATGGGGCGCACCCAGTCGAGAATTTTTTCACAATGGGGGAAACCCTGATGGAGCG  
ACGCCGCGTGAGGATGAAGGTCTTCGGATTGTAAACCTCTGTCACTGGGGAAGAAACGC  
TTCAAGTAAACATCTTGAAGCCTGACTTAACCCGGAGAGGAAGCAGTGGCTAACTCTGTG  
CCAGCAGCCGCGGTAATACAGAGACTGCAAGCGTTATTTCGGATTCACTGGGCGTAAAGGG  
TGCGCAGGCGGCCGTGTGTGTGAGGCGTGAAAGCCCGGAGCTCAACTCCGGAATTGCACC  
TCAAACCTACACGGCTAGAGCATTTGGAGAGGGTAGCAGAATTCACGGTGTAGCAGTGAAAT  
GCGTAGATATCGTGAGGAATACCAGAGGCGAAGGCGGCTACCTGGACAATTGCTGACGCT  
CAGGCACGAAAGCGTGGGGAGCAAAAGGGATTAGAAACCCGCGTAGTCC

>Otu9271

CCAGCCTATGGGGGGCTCCAGTGGGGAATATTGCGCAATGGGCGAAAGCCTGACGCAGCA  
ACGCCGCGTGAGTGAAGAAGGCCTTCGGGTTGTAAAGCTCTGTGAGAGGGAAAGAATATG  
GCTGGCAACACCAGCCTTTGACGGTACCCTCGAAGGAAGCACTGGCTAACTCCGTGCCAG  
CAGCCGCGGTAATACGGAGAGTGCAAGCGTTGTTTCGGAATTATTGGGCGTAAAGCGCGTG  
TAGGTGGCTTGACAAGTCTGATGTGAAAGCCCAGGGCTCAACCCTGGAAGTGCACCGGAT  
ACTGTGAGCTTGAGTACTGGAGGGGGAAGTGGAATTCTCGAGTGTAGAGGTGAAATTCG  
TAGATATTTCGGAAGAACATCAGTGGCGAAGGCGACTTCCTGGACAGATACTGACACTGAG  
ACGCGAAAGCGTGGGTAGCAATCAGGATTAGATACCCGAGTAGTCC

>Otu9274

CCAGCCTACGGGGGGCAGCAGTGGGGAATCTTGGACAATGGAGGAACTCTGCTCCAGCC  
ATGCCGCGTGAGTGGTGAAGGCCTTCGGGTTGTAAACTCTTTTACCCGGGAAGATAATG  
ACTGTACCGGGGAGAATAAGCTCCGGCTAACTTCGTGCCAGCAGCCGCGGTAATACGAAGG  
GGGCTAGCGTTGTTTCGGAATTACTGGGCGTAAAGCGCGCGCAGGCGGTTCTTCAAGTCAG  
GGGTGAAAGCCCAGAGCTCAACTCTGGAATTGCCTTTGAACTGTAGAACTTGAGTACGA  
GAGAGGTGAGTGGAAATTCACAGTGTAGAGGTGAAATTCGTAGATATTGGGAAGAACCCG  
GTGGCGAAGGCGGCTCACTGGCTCGTTACTGACGCTCAGGCGCGACAGCGTGGGGATCAA  
ACAGGATTAGAGACCCGCGTAGTCC

>Otu9277

CCAGCCTACGGGGGGCTGCAGTCGAGAATCTTCCGCAATGGACGAAAGTCTGACGGAGCG  
ACGCCGCGTGATTGATGAAGTCCCTTTGGGACGTAAAGATCTTTTATGAGGGAAGAAGTT  
TATTGACTGTACCTCATGAATAAGAGGCTCCTAATCTCGTGCCAGCAGGAGCGGTAATAC  
GAGAGCCTCGAGCGTTATCCGGAATTATTGGGCGTAAAGGGTGCGTAGGTTGTTCTGTTA  
GTCTTCCGTCAAATCTTTCGGCTTAACCGGGGGCATGCGGGGGAAACGGCAGGACTTGAA  
AGTGCAGAGGGGTGTACGGAACCTCATGGTGTAGGGGTGAAATCCGTTGATATCATGGGGAA  
CACCGAAAGCGAAAGCAGTACACTGGCGCATATTTGACACTGAAGCACGAAAGCGTGGGT  
AGCGAATGGGATTAGAAACCCCTCGTAGTCC

>Otu9278

CCAGCCTATGGGTGGCTCCAGTGGGGAATATTGGACAATGGGGGAAACCCTGATCCAGCA  
ATGCCGCGTGTTGAAGAAGGCCTGCGGGTTGTAAAGCACTTTTGTGGGGAAGAAGGAT  
ACGAAAGTATTTTGACGGTACCCAAAGAATAAGCACCGGCTAACTCTGTGCCAGCAGCCG  
CGGTAATACAGAGGGTGCGAGCGTTAATCGGAATTACTGGGCGTAAAGCGCGCGTAGGTG  
GTTTTGTGTGTTGGGTGTGAAATCCCTGGGCTTAACCTAGGAATTGCATTCAAACCTGCA  
AGACTTGAGTGGAGTAGAGGTGAGTGGAAATTTCCGGAGTAGCGGTGAAATGCGTAGATAC  
CGGAAGGAACACCACTGGCGAAGGCGACTCACTGGACTCTAACTGACACTGAGGTGCGAA  
AGCGTGGGGAGCGAACAGGATTAGAAACCCCACTAGTCC

>Otu9281

CCAGCCTACGGGACGCTGCAGTGGGGAATCTTGCAGCAATGGGCGAAAGCCTGACGCAGCG  
ACGCCGCGTGAGGATGAAGGTCTTCGGATTGTAAACTTCTGTAAAGTGGGAAGAAATGC  
CTATCAATAATACTGATAGGAGCTGACTGTACCATTAGAGAAAGCACCGGCTAAACTCGT  
GCCAGCAGCCGCGGTAATACGAGTGGTGCAAGCGTTATTTCGGAATCATTTGGGCGTAAAGG  
GTGTGTAGACGGCATATCAAGTCAACTGTTTAATTCTCCGGCCTAACCGGAGGCATGCGG  
TAGAAACTAATGTGCTCGAGGTTGGAAGAGAGAAGTGGAAATTCCTCGGAGTAGCGGTAAAA  
TGCGTAGATCTCGGGAGGAACACCAATGGCGAAGGCGAGCTTCTTGGTCCATACCTGACGT  
TGAGACACGAAAGCGTGGGGAGCAAACAGGATTAGATACCCCGGTAGTCC

>Otu9285

CCAGCCTACGGGTCGCTCCAGTGGGGAATCTTGCGCAATGGACGAAAGTCTGACGCAGCC  
ACGCCGCGTGAGTGAAGAAGGCCCTTCGGGTGTAAAGCTCTGTCTGGGAGGGACGAAAAAC  
CTTGAGGTTAACAGCCTCAGGACTTGACGGTACCTCCAAAGGAAGCACCGGCTAACTTCG  
TGCCAGCAGCCGCGGTAATACGAGGGGTGCAAGCGTTGCTCGGAATTATTGGGCGTAAAG  
GGTAGGTAGGTGGTCTCATTTGTCTGGGGTGAAAGCCTTGAGCTTAACCAAGAAGTGCC  
CTAGAAACGGTGAGACTAGAGTCTTGAGAGGGTCTGGAATTCCCGGTGTAGCGGTGAA  
ATGCGTAGAGATCGGGAGGAACACCAGAGGCGAAGGCGGCGACCTGGACAAGTACTGACA  
CTCAACTACGAAAGCGTGGGTAGCAAACAGGATTAGAAATCCGTGTAGTCC

>Otu9289

CCAGCCTATGGGAGGCAGCAGTCGAGAATTTTTTCACAATGGGGGAAACCCTGATGGAGCG  
ACGCCGCGTGAGGATGAAGGTCTTCGGATCGTAAACTCCTGTCACTACAGAACAAGGGT  
AGTAGCATTAATAAAGCTACTACTTGATGGTATGTGGAGAGGAAGGAACGGCTAACTCTG  
TGCCAGCAGCCGCGGTGATACAGAGGTTCCAAGCGTTGTTTCGGATTCACTGGGCGTAAAG  
GGTGCGTAGGAGGTCAGATAAGTAGGATGTGAAATCCTGTCTGCTAACGACAGAAGTGC  
TTCTAAACTGCCTGACTAGAGGATCGGAGAGGAGAGCGGAATTCTTGGTGTAGCGGTGAA  
ATGCGTAGATATCAAGAGGAACGCCAACAGCGGAGGCAGCTCTCTGGAAGACTCCTGACT  
CTGAGGCACGAAGGCCAGGGTAGCAAACGGGATTAGAAACCCCTGTAGTCC

>Otu9294

CCAGCCTATGGGTGTCACCAGTAAGGAATATTGGTCAATGGACGCAAGTCTGAACCAGCC  
ATGCCGCGTGAGGATGAAGGTCTCTGGATTGTAAACTCTTTTATTGGGAAGAAACC  
CATTTTTTCTAAAGTGGTTGACGGTACCAGATGAATAAGCACCGGCTAACTCCGTGCCAG  
CAGCCGCGGTAATACGGAGGGTGCAAGCGTTATCCGGATTCACTGGGTTTAAAGGGTGCG  
TAGGTGGGCAGGTAAAGTCAGTGGTGAAATCTCCGGGCTTAACCCGGAAGTGCCTTGAT  
ACTATCTGTCTTGAATATCGTGGAGGTGAGCGGAATATGTCATGTAGCGGTGAAATGCAT  
AGATATGACACAGAACACCGATTGCGAAGGCAGCTGACGAAACTGTAAGTACGCTGAGG  
CACGAAAGCGTGGGGATCAAACAGGATTAGAAACCCGCGTAGTCC

>Otu9295

CCAGCCTACGGGGGGCAGCAGTAGGGAATCTTGCGCAATGGGCGAAAGCCTGACGCAGCG  
ACGCCGCGTGCGGGATGAAGCCCTTCGGGGTGTAAAGCTCTTTCGGCGGGGACGATGATG  
ACGGTACCCGCGAGAAGAAGCCCCGGCTAACTTCGTGCCAGCAGCCGCGGTAATACGAAGG  
GGGCTAGCGTTGCTCGGAATGACTGGGCGTAAAGGGCGCGTAGGCGGTTCTGTACAGTCAG  
ACGTGAAATTCCCGGGCTCAACCCGGGGGCTGCGTTTGATACGTGCGGGCTTGAGTTCGG  
AAGAGGGTCTGTGGAATTCACAGTGTAGAGGCGAAATTCGTAGATATTGGGAAGAACACCG  
GTGGCGAAGGCGGCGACCTGGTCCGATACTGACGCTGAGGCGCGAAAGCGTGGGGAGCAA  
ACAGGATTAGAGACCCTCGTAGTCC

>Otu9296

CCAGCCTATGGGGTGCTCCAGTGGGGAATCTTGCGCAATGGGCGAAAGCCTGATGCAGCA  
ACGCCGCGTGAGTGAAGAAGGCCCTTGGGTGTAAAGCTCTTTCGGTTGAGAAGAAGGGG  
AAGTTAGCTAATACCTTACTTCTTTGACGGTACCAGCAGAAGAAGCACCGGCTAATTCCG  
TGCCAGCAGCCGCGGTAATACGGGAGGTGCAAGCGTTGTTTCGGAGTGACTGGGCGTAAAG  
CGCACGTAGGCGGGTTTGTAAAGTCGGATGTGAAATCCCTAGGCTTAACCTGGGAAGTGC  
TCCGAAACTATAAGTCTTGAATACCTCAGAGGTTGGTAGAATTCCTGGTGTAGGAGTGAA  
ATCCGTAGATATCAGGAGGAATACCGGAGGCGAAGGCAGCCAAGTGGGAGAGTATTGACG  
CTGAGGTGCGAAAGCGTGGGGAGCAAACAGGATTAGAGACCCCTGTAGTCC

>Otu9307

CCAGCCTACGGGTCGCTGCAGTCGAGAATTTTTTCACAATGGACGAAAGTCTGATGGAGCA  
ACGCCGCGTGAGGATGAAGGTTTTTCGGATTGTAAACTCCTGTCACTGCAGAACAAGGTA  
ACGTCAAGTTAACAGCCGCGGTTATTGATGGTATGCGGAGAGGAAGGGACGGCTAACTCTG  
TGCCAGCAGCCGCGGTAAGACAGAGGTCCCGAGCGTTGTTTCGGATTCAATTGGGCGTAAAG  
GGTGTGTAGGAGGTCGGGTGAGTCAGGTGTGAAATCTCAGGGCTTAACCTGAAACTGCG  
CTTGATACTGCCCGGCTAGAGGATCGGAGGGGGTATCGGAATTTATGGTGTAGCAGTGAA  
ATGCGTAGATATCATAAGGAACACCGGTGGCGAAGGCGGATACCTGGAAGATTCTGACT  
CTGAAACACGAAAGCCAGGGGAGCAAACGGGATTAGAAACCCGGGTAGTCC

>Otu9315

CCAGCCTATGGGACGCTGCAGCCGAGAATCTTCCACAATGGACGAAAGTCTGATGGAGCG  
ACGCCGCGTGATTGATGAAGTCCCTCTGGGACGTAAAGATCTTTTATGAGGGAAGAAGTT  
TATTGACGGTACCTCATGAATGAGGGGCTCCTAATCTCGTGCCAGCAGGAGCGGTAATAC

GAGAGCCCCGAGCGTTATCCGGAATTATTGGGCGTAAAGGGTGTGTAGGTGGCATTGT  
TACTTTTTGTTAAATCCCAGAGCTTAACCTTTGGAATCGCAAGAGAAACGGCAAAGCTAGAG  
AGTGTGAGAGGTCTATGGAACCTCATGGTGTAGGGGTGAAATCCGTTGATATCATGGGGAA  
CACAAAAGCGAAGGCAATAGACTGGCGCATTTCTGACACTGAAACACGAAAGCGTGGGT  
AGCGAATGGGATTAGAAACCCGCGTAGTCC

>Otu9316

CCAGCCTACGGGGTGCACCAGTGGGGAATTTTGGACAATGGGGGCAACCCTGATCCAGCC  
ATGCCGCGTGAGTGAAGAAGGCCTTCGGGTGTAAAGCTCTTTCGGCGGGGACAAAACGG  
CGACTGCGAATAACGGTCGTTAATGATGGTACCGGAAGAATAAGCACCGGCTAACTACGT  
GCCAGCAGCCGCGTAATACGTAGGGTGAAGCGTTAATCGGAATTACTGGGCGTAAAGC  
GTGCGCAGGCGGTTTCGCTAAGACAGATGTGAAATCCCCGGGCTTAACCTGGGAACTGCAT  
TTGTGACTGGCGGGCTAGAGTATGACAGAGGGGGGTAGAATTCACGTGTAGCAGTGAAA  
TGCGTAGAGATGTGGAGGAATACCGATGGCGAAGGCAGCCCCCTGGGCCAATACTGACGC  
TCATGCACGAAAGCGTGGGAGCAAACAGGATTAGATACCCCTGTAGTCC

>Otu9319

CCAGCCTATGGGTGGCACCAGTGAGGAATCTTGGACAATGAACGAAAGTTTGATCCAGCA  
AAGTCACGTGAATGATGAAAATAATAATTGTAACATTCTTTTTTCAGTGAAGATCATGAC  
ATTAATTGAAGAATAAGCTCCGACCAACTTCGTGCCAGCAGTCGCGGTAATACGGGGGA  
GCTAGTGTTATTCGCAGTGACTGGGCGTAAAGGGCATCTAGGTGGCATTGTAGTTTTTA  
ATGAAACATTGAGGCCTAACCTCATTCTTATTACTAACACTGTTTGCTAAGGGTTTGAAA  
AAAGAAAACAGAATCTTTAGTTGAGAGGTGAAATTCTACGACATTAAAGAGGGCTATCAAA  
AGCGAAGGCAGTTTTCTAGTTTAACTGACACTGAAAGGCAAAGCATGTGTAGCAAAC  
GGATTAGAGACCCGGGTAGTCC

>Otu9320

CCAGCCTATGGGTGGCTGCAGTGGGGAATCCTGGGCAATGGACTAACGTCTGACCTGGTG  
AGAACACGTGCACGACGAAGGCGCTAGTTTTTTGTAAAGTGCTTTTACCGACGAGAAAAA  
GGTCAGTACTCGGCGAAAAAGCGTCGGCCAACTTCGTGCCAGCAGCTGCGGTAAGACGA  
AGGACGCGGGTGTTATTCGTTTTGATTGGGTGTAAAGGGTATGTAGGTGGTTTTCTTAGTT  
TTTGGCTAAAAAGAGCAACGAGTATCGATGCGTCTGGCCAATTCGCTAGAATCTTGAGCTG  
GTTAAAGGTATAAACTATTCTTACGTAAAGGTTCAATTTTTTGGAGGTACGGAAGACCGT  
CGACAGGCGAAAGCATTTTTCCAGTTCCAGCTGACGCTGAGGTACGGAAGCTTAGGGAGC  
GAACGGGATTAGATACCCCCGTAGTCC

>Otu9328

CCAGCCTATGGGTGGCACCAGTGGGGAATCTTGACAATGGAGGCAACTCTGATGCAGCG  
ACGCCGCGTGAGCGATGAAGCCCCCTCGGGGTGTAAAGCTCTTTCGGCAGGGACGATAATG  
ACGGTACCTGAAGAAGAAGCTGCGGCTAACTACGTGCCAGCAGCCGCGGTAATACGTAGG  
CAGCGAGCGTTGTTTCGAATTACTGGGCGTAAAGAGCGTGTAGGCGGTGCTCTAAGTTCG  
GTGTGAAATCTCCTGGCTTAACCTGGGAGGGTGCGCCGAAAACCTGGAGTGCTCGAGCGTGG  
GAGAGGAAAGCGGAATTCCTGGTGTAGCGGTGAAATGCGCAGATATCAGGAGGAACACCA  
GTAGCGAAGGCGGTGATCTGGGCCAATACTGACGCTGAGGAGCGAAAGCGTGGGGAGCGA  
ACAGGATTAGAACCCCTGTAGTCC

>Otu9333

CCAGCCTACGGGTGCGCAGCAGTCGAGAATCTTTCGCAATGGGCGCAAGCCTGACGAAGCG  
ACGCCGTGTGAGCGAAGAAGGCCTTCGGGTGTAAAGCTCTTTCGCTAGGGAACAAGAAA  
GGCTGGATAATACCCAGCCAATTTGATGGTACTTGGTAAAGAAGCACCGGCTAACTCCGT  
GCCAGCAGCTGCGGTAATACGGAGGGTGCAAGCATTGATCGGAATTACTGGGCGTAAAGG  
GCGCGTAGGCGGCCCTGGAAAGTCAGATGTGAAATTCCTGGGCTCAACCCAGGAGCGGCAT  
TTGAAACTTCAGACTAGAGTGCAATTAGGGAAAACGGAATTCACGTGTAGCGGTGAAA  
TGCGTAGATATGTGGAAGAACACCGGTGGTGAAGACGGTTTTCTGGGTGTTACTGACGC  
TGAGGCGCGAAAGCTTGGGGAGCAAACAGGATTAGAGACCCCTGTAGTCC

>Otu9336

CCAGCCTACGGGGGGCACCAGTGGGGAATCTTGCGCAATGGACGAAAGTCTGACGCAGCC  
ACGCCGCGTGAGTGAAGAAGGCCTTCGGGTGTAAAGCTCTGTGCGAGGGGACGAAAAGC  
TTTGGAGTGAATAGCTTCAGAGCCTGACGGTACCCTTAAAGGAAGCACCGGCTAACTCTG  
TGCCAGCAGCCGCGGTAATACAGAGGGTGCAAGCGTTGCTCGGAATCATTTGGGCGTAAAG  
GGCAAGTAGGTGGTCTCATTTGTCTCGGGTGAAGAGCCTTGGGCTTAACCCAAGAAGTGCC  
CGAGAAACGGTGAGACTCGAGTTTCGGAGAGGGTTCGTGGAATTCCTGGTGTAGCGGTGAA  
ATGCGTAGAGATCGGGAGGAACACCAGCGGCGAAGGCGGCGACCTGGTCCTTTACTGACG

CTGAGGCGCGAAAGCGTGGGGAGCAAACAGGATTAGAAACCCTGGTAGTCC

>Otu9337

CCAGCCTATGGGAGGCAGCAGTGGGGAATCTTGCGCAATGGGGGAAACCCTGACGCAGCG  
ACGCCGCGTGGGCGAAGAAGGCCTTCGGGTGTAAAGCCCTGTGGGGCGGGACGAATACC  
TCACGGTAAACAATCGTGAGGAGTGACGGTACCGCCTTAGCAAGCACCGGCTAACTCTGT  
GCCAGCAGCCGCGGTAAGACAGAGGGTGCAAACGTTGCTCGGAATTACTGGGCGTAAAGC  
GCGTGTAGGCGGCTTTGTAAAGTCCGATGTGAAAGCCCTTCGCTCAACGAGGGAAGCGCAT  
TGGATACTGCAGAGCTCGAGTCCTGGAGGGGAGAGCGGAATTCTCGGTGTAGAGGTGAAA  
TTCGTAGATATCGGGAGGAACACCAGTGGCGAAGGCGGCTCTCTGGACAGGTACTGACGC  
TGAGACGCGAAAGCATGGGGAGCGAACAGGATTAGATAACCCCGGTAGTCC

>Otu9344

CCAGCCTATGGGAGGCAGCAGTCGAGGATCTTCGGCAATGGGCGCAAGCCTGACCGAGCG  
ACGCCGCGTGCGGGATGAAGGCCTTCGGGTGTAAACCGCTGTCAGTGGGGAGGAAATGC  
GTAGGGGTCTCCCCTACGTTTGACCTATCCGCAGAGGAAGTACGGGCTAAGTTTCGTGCC  
AGCAGCCGCGGTAAGACGAACCGTACGAACGTTATTCGGAATCACTGGGCTTAAAGGGTG  
CGTAGGCTGCGCAGCAAGTTGGGTGTGAAATCCCTCGGCTCAACCGAGGAACTGCGCCCA  
AAACTGCTGTGCTCGAGGGAGACAGAGGTGAGCGGAACTTAGGGTGGAGCGGTGAAATGC  
GTTGATATCCTAAGGAACACCCGTGGCGAAAGCGGCTCACTGGGTCTCTTCTGACGCTGA  
GGCACGAAAGCTAGGGTAGCAAACAGGATTAGAGACCCCTGTAGTCC

>Otu9346

CCAGCCTATGGGTGCGCAGCAGTCGAGAATCTTCCACAATGGACGAAAGTCTGATGGAGCG  
ACGCCGCGTGGTTGATGAAGTCCTTCGGGACGTAAAAACCTTTTGTGAGGGAGGAAGTTA  
TTGACGTTACCTCATGAATAAGGGGCTCCTAACTCTGTGCCAGCAGGAGCGGTAATATAG  
AGGCCCAAGCATTATCCGGAATCACTGGGCGTAAAGGGTGTGTAGGCGGTCGTGTTAGT  
CTTTCGTGAAAGATCTTCGGCTTAACCGAGGAGACGCGGGAGAAACGGCACGGCTTCGAG  
GACGCGAGAGGTATATGGAATCATGGTGTAGGGGTGAAATCCGTTGATATCATGGGGAA  
CACCAAATGCGAAGGCAATATACTGGCGCGCTCCTGACGCTGAAACACGAAAGCGTGGGA  
ATCGAACGGGATTAGATAACCCGTGTAGTCC

>Otu9349

CCAGCCTATGGGACGCTGCAGTGGGGAATTTTGGACAATGGGCGCAAGCCTGATCCAGCA  
ATGCCGCGTGAGTGAAGAAGGCCTTCGGGTGTAAAGCCCTTTTGTGAGGGAAGAAACGG  
GTTGGTCTAATACTGATCTAATGACGGTACCTGAAGAATAAGCACCGGCTAACTACGT  
GCCAGCAGCCGCGGTAATACGCAGGGTGCAAGCGTTAATCGGAATTACTGGGCGTAAAGC  
GTGCGCAGGCGGTTATGTAAGACAGATGTGAAATGCCCGGGCTTAACCTGGGAACTGCAT  
TTGTGACTGCATGGCTAGAGTTTGGCAGAGGGGGGTAGAATTCCACGTGTAGCAGTGAAA  
TGCGTAGATATGTGGAGGAACACCGATGGCGAAGGCAGCCCCCTGGGTCAAGACTGACGC  
TCATGCACGAAAGCGTGGGGAGCAAACAGGATTAGATAACCCGTGTAGTCC

>Otu9350

CCAGCCTATGGGTGCGCTGCAGTGGGGAATTTTCTCAATGGGGGAAACCCTGAAGGAGCG  
ACGCCGCGTGGAGGATGAAGTCTTCGGATTGTAAACTCCTGTCATCAGGGAACAATTTG  
CATGCGTTAACTGTGTATGCATTGATAGTACCTGAAGAGGAAGAGACGGCTAACTCTGTG  
CCAGCAGCCGCGGTAATACAGAGGTCTCAAGCGTTGTTTCGGATTCAATTGGGCGTAAAGG  
TGCGTAGGTGGTGTGCTAAGTCGGGTGTGAAATCCCGGGGCTCAACCCCGGAACTGCATT  
CGATGCTGCGATGCTCGAGGGCTGGAGAGGAGATTGGAATTCACGGTGTAGCAGTGAAAT  
GCGTAGATATCGTGAGGAAGACCAGTGGCGAAGGCGAATCTCTGGACAGTTCTTGACACT  
GAGGCACGAAGGCCAGGGGAGCAAACGGGATTAGAGACCCCTTGTAGTCC

>Otu9354

CCAGCCTACGGGTGGCACCAGTCGAGAATCTTCCGCAATGGACGAAAGTCTGACGGAGCG  
ACGCCGCGTGGAGGATGAAGTGCTTCGGCATGTAAACTTCTTTTGCCAGGGAAAAAGTTA  
TTGATTGTACCTGGAGAATAAGAAGTTGCTAAACTCGTGCCAGCAGCAGCGGTAATACGA  
GTGCTTCGAGCGTTATCCGGAATCATTGGGCGTAAAGGGTGTGTAGGTGGTAGTGTAGT  
CTCGTGTTAAATCTTTTCGGCTCAACCGAGAGGCTGCATGGGAAACGGCACAACTAAGAGG  
ACGGAAGAGGTCTCTGGAATCATGGTGTAGCGGTGAAATGCGTTGATATCATAGGGAAC  
ACCAAAGCGAAGGCAAGAGACTGGTCCGCTCCTGACACTGAAACACGAAAGCGTGGGTC  
GCGAATGGGATTAGAAACCCTCGTAGTCC

>Otu9357

CCAGCCTACGGGGCGCTCCAGTGTGGAATATTGGACAATAGGCTACCGCCTGATCCAGCA  
ATACTTATTGGATGAAGTGACGGTGAAAATTGTAAAGTCCTCTCGTTGTTAAAGATGATG

ACAAATAGCAAAGCAAGAAGTCCTGACAAAACCTCTGTGCCAGCAGCCGCGGTAAGACAGA  
GGGGGCAAGCGTTATTTCCTCGTTATTTCGGCGTAAAGGGTACGTAGATGAACAACTAATAA  
TATTATGTTAAATTTCTAGAAGATTTTTTTAGACTAATGTTTTAAATTGTTTTGTACAAAGA  
ATTAAACAAGATTTATAGGAACTTTATAAGTAGGGGTAAAATCCGACGATATGTAAAGGA  
ACACCAATAGCTAATGCATATATTTAGGTTTAATTGTCATTGAGGTACGAAGGTATAGGT  
AGCAAACAGGATTAGAAACCCGAGTAGTCC

>Otu9359

CCAGCCTATGGGTGGCACCAGTCAAGAACTTCCACAATGGACGAAAGTCTGATGGAGCG  
ACGCCGCGTGGTTGATGAAGTCCTTCGGGACGTAAAAACCTTTTATGAGGGAGGAAGTAA  
TTGACGTTACCTCATGAATAAGGGGCTCCTAACTCTGTGCCAGCAGGAGCGGTAATACAG  
AGGCCCAAGCATTATCCGGAATCACTGGGCGTAAAGGGTGTGTAGGCGGCCATATTAGT  
CTGTCTGTGAAAGGCCTTTGGCTCAACCAAGGGACCGCGGGAGAAACGGTATGGCTTAGAG  
GATGTGAGAGGTAAAGGGAACTCATGGTGTAGGGGTGAAATCCGTTGATATCATGGGGAA  
CACCAAATGCGAAGGCACCTTTACTGGCACACTCCTGACGCTGAAACACGAAAGCGTGGGA  
ATCGAATGGGATTAGAAACCCCGTAGTCC

>Otu9363

CCAGCCTACGGGTGGCTCCAGTCGAGGATCTTTCGCAATGGGCGAAAGCCTGACGAAGCG  
ACGCTGTGTGAACGATGAAGGCCTTCGGGTCGTAAAGTTCTTTCGCCTAAGAACAAGAGA  
GAGACGTGAATAACGTTTTTGATTTGAGGGTACTAGGTAAAGAAGCACCGGCTAACTCCGT  
GCCAGCAGCTGCGGTAATACGGAGGGTGCAAGCATTAAATCGGATTTATTGGGCGTAAAGG  
GCGCGTAGGCGGAAGAGCAAGTCAGGTGTGAAATTCGAAGCTCAACTTCGGAGCTGCAC  
TTGAAACTGCTCATCTAGAGGATTGGCGGAGAAAACGGAATTCACGAGTAGCGGTGAAA  
TGCGTAGATATGTGGAAGAACACCGGTGGCGAAAGCGGTTTTCTAGCTTATTCCTGACGC  
TGAGGCGCGAGAGCAAGGGGAGCAAACAGGATTAGAAACCCCGTAGTCC

>Otu9372

CCAGCCTACGGGGTGCTCCAGTCGAGAATCTTCCGCAATGGACGAAAGTCTGACGGAGCG  
ACGCCGCGTGATTGATGAAGTCCTTCGGGACGTAAAGATCTTTTATGGAGGAGGAAGTAA  
TTGACGTTACTCCATGAATAAGGGGCTCCTAACTCTGTGCCAGCAGGAGCGGTAATACAG  
AGGCCCAAGCATTATCCGGAATCACTGGGCGTAAAGGGTGTGTAGGCGGTCTGTGTTAGT  
CTTTTGTTAAAGTTCTTCGGCTTAACCGAGGAAATGCAGAGGAAACGGCACGACTTAGAG  
GTTGCGAGAGGTACAGGGAACTCATAGTGTAGGGGTGAAATCCGTTGATATTATGGGGAA  
CACCAAATGCGAAGGCACGTGTACTGGCGCACACCTGACGCTGAGACACGAAAGCGTGGGA  
ATCGAACGGGATTAGAGACCCCGTAGTCC

>Otu9374

CCAGCCTATGGGTGCTGTCAGTCGAGAATCATTCGCAATGGGCGAAAGCCTGACGATGCG  
ACGCCGCGTGTGTGATGAAGGCCTTCGGGTCGTAAAGCACTTTCGCCTGGGAACAAGAGA  
GGTAGGCTAATAATCTGCCGATTTGAGGGTACCAGGTAAAGAAGCACCGGCTAACTACGT  
GCCAGCAGCTGCGGTAATACGTAGGGTGCTAGCGTTAATCGGAATTATTGGGCGTATAGG  
GCGCGTAGGCGGATTGATAAGTTGGATGTGAAATCCCAGAGCTCAACTCTGGAACAGCAT  
CCAAAACGTGTCGATCTAGAGGGTAGATGGGGAAAATGGAATTCACAAGTAGCGGTGAAA  
TGCGTAGATATGTGGAAGAACACCTGTGGCGAAAGCGGTTTTCCAATTTACACCTGACGC  
TGAGGCGCGAAAGCAAGGGGATCAAACAGGATTAGATAACCCAGTAGTCC

>Otu9382

CCAGCCTACGGGAGGCAGCAGTAAGGGATATTGCGCAATGGGCGAAAGCCTGACGCAGCA  
ACGCCGCGTGAGGACGACGGCCTTCGGGTGTAAACTCCTTTTGGTCGGGACGAGGAAG  
GACGGTACCGACCGAATAAGCTTCGGCTAACTACGCGCCAGCAGCCGCGGTAAGACGTAG  
GAAGCGAGCGTTATCCGGATTTACTGGGCTTAAAGGGTGTGTAGGCGGTAGCCAAGTTG  
TGCATGAAAGCTGTCCGCTCAACGGGCAGAGGCTGTGCAATACTGGCTGACTAGAGGCTG  
TGAGAGGGACGCGGAATTCCGGGTGTAGCGGTGAAATGCGTAGAGATCCGGAAGAACACC  
AGAGGCGAAGGCGGCGTCTTGGCACAGCACTGACGCTGAGACACGACAGCATGGGGAGCG  
AACGGGATTAGAAACCCCGTAGTCC

>Otu9389

CCAGCCTATGGGAGGCAGCAGTGGGGAATTTTTCGCAATGGGGGAAACCTGACGCAGCA  
ACGCCGCGTGAGGATGAAGGCCCTCGGGTCGTAAACTCCTGTCAAACGGGAACAAGAAA  
GTGATAGTACCGTTAGAGGAAGAGACGGCTAACTCTGTGCCAGCAGCCGCGGTAATACAG  
AGGTCTCAAGCGTTGTTTCGGATTCATTGGGCGTAAAGGGCGCGCAGGCTGTGGGGTAAAGT  
CGGGTGTGAAATTTAGAGGCTCAACCTCTAAACTGCATTTCGATACTGCTCTGCTAGAGGA  
CTGTAGAGGAGATTGGAATTCACGGTGTAGCAGTGAAATGCGTAGATATCGTGAGGAAGA

CCAGTGGCGAAGGCGAATCTCTGGGCAGTTCCTGACGCTCATGCACGAAGGCCAGGGGAG  
CAAACGGGATTAGAAACCCCTGTAGTCC

>Otu9392

CCAGCCTACGGGTGGCAGCAGTGGGGAATATTGCACAATGGGGGAAACCCTGATGCAGCG  
ACGCCGCGTGAGTGAAGAAGTATTTTCGGTATGTAAAGCTCTATCAGCAGGGACGAAGCGG  
AGTTCGTGAGAACTCCATTGACGGTACCTGACTAAGAAGCCCCGGCTAACTACGTGCCAG  
CAGCCGCGGTAATACGTAGGGGGCAAGCGTTATCCGGATTTACTGGGTGTAAAGGGAGCG  
TAGACGGTAATGTAAGTCAGATGTGAAAGCCCCGGGGCTCAACCCGGGACTGCATTTGAA  
ACTATGATACTAGAGTGCAGGAGAGGTAAGTGGAATTCCTAGTGTAGCGGTGAAATGCGT  
AGATATTAGGAGGAACACCAGTGGCGAAGGCGGCTTACTGGACTGTAACTGACGTTGAGG  
CTCGAAAGCGTGGGGAGCAAACAGGATTAGAGACCCCGTAGTCC

>Otu9403

CCAGCCTATGGGATGCTGCAGTCTAGAGGCTTCGGCAATGGGCGAAAGCCTGACCGAGCG  
ACGCCGCGTGCGGGATGAAGCCCCCTTGGGGTGTAAACCGCTTTCGATCGGGAAAAAGGCC  
CGGGTGGCGAACCCGGGATTGATGGTACCGGAAGAAGAAGCACCGGCTAACTCCGTGCCA  
GCAGCCGCGGTAATACGGAGGGTGCAGCGTATTTCGGATTTCATTGGGCGTAAAGGGCGC  
GTAGGTGGTTGGGTAAGTCCGGTGTGAAAACGCTATCGCTCACCGAAGCGAATGCGCTGG  
ATACTGCTTAACTTGAGTTCGAGAGAGGTTGGCGGAATACCTGGTGTAGCGGTGGAATGC  
GTAGATATCAGGTAGAACATCTGTGGCGAAGGCGGCCAACTGGCTCGACACTGACACTGA  
GGCGCGAAAGCGTGGGGAGCAAACGGGATTAGAAACCCCTAGTAGTCC

>Otu9404

CCAGCCTACGGGTTGCTGCAGTGGGGAATCTTGCGCAATGCGCGAAAGCGTGACGCAGCA  
ACGCCGCGTGGGGGAAGACGGCCTTAGGGTGTAAACCCCTTTCAGGAGGGACGAAGGTT  
CACCGGTGAATAGCCGTGTGGATTGACGGTACCTCCACAAGAAGCACCGGCTAACTACGT  
GCCAGCAGCCGCGGTAATACGTAGGGTGCAGCGTGTGTCGGAATCATTGGGCGTAAAGC  
GCGCGTAGGTGGCCATTTAAGTCCGCTGTGAAAGTCAAAGGCTCAACCTTTGAAAGCCGG  
TGGATACTGGATGGCTAGAGTACGGAAGAGGCGAGTGGAATTCCTGGTGTAGCGGTGGAA  
TGCGCAGATATCAGGAGGAACACCAATAGCGAAGGCAGCTCGCTGGGACGTTACTGACAC  
TGAGGCGCGAAAGCGTGGGGAACGAACAGGATTAGAAACCCCTCGTAGTCC

>Otu9405

CCAGCCTACGGGGGCTGCAGTGAAGAATCTTGGGCAATGGACTAACGTCTGACCCAGTGA  
GAACACATGCATGACGAATGCGCCAGTTTTCTGTAAAGTGCTTTCGCGAGATGAAGATA  
TTGACTTTTAGCTCGGGATGAAGCGCCGGCCAACTCCGTGCCAGCAGCCGCGGTAAGACGG  
AGGGCGCGAGTGTTATTCGTTTTGATTGGGTGTAAAGGGTATGTAGGCGGCACCGGATTT  
TTTGGCTTAAAGCGCGGAGTATTCCTATGCGTAAGCCTTCTTCTGAAGGAGCTAGAGTTG  
GAAATGGGTTTAGTCAAGTTCGCTAGTAGGGGTAAAATCCAGCGATATGCGAACGAACGT  
CAGCTGGCGCAGGCGCTTCTCCGGTTCCAACCTGACGCTGAGGTACGGAAGCTTAGGGAGC  
AAACGGGATTAGAAACCCCTGGTAGTCC

>Otu9416

CCGCCTACGGGGTGCTGCAGTGGGGAATATTGCGCAATGGGGGAAACCCTGACGCAGCAA  
CGCCGCGTGGGTGAAGAAGGCCTTCGGGTGTAAAGCCCTGTGAGGAGGAAAGAAAGCGC  
AGCCAATCAATACCTGGTTGCGTTGACGGTACCTCCAGAGGAAGCACCGGCTAACTCCGT  
GCCAGCAGCCGCGGTAATACGGAGGGTGCAGCGTGTGTTTCGGAATCATTGGGCGTAAAGC  
GCGTGCAGGCGGTCCGGCAAGTCGGGTGTGAAAGCCCTCGGCTCAACCGAGGAATTGCAT  
TCGAAACTGCCGACTTGAGTGCGGGAGAGGGAAGTGGAACCTCATAGTGTAGAGGTGAAA  
TTCGTAGATATTATGAGGAACACCTGTGGCGAAGGCGGCTTCCTGGACCGACACTGACGC  
TGAGACGCGAAAGCGTGGGGAGCAAACAGGATTAGAGACCCCTGTAGTCC

>Otu9431

GGACTACGAGGGTATCTAATCCTGTTTGCTACCCACGCTTTCGTGCATCAGCGTCAGTTA  
TCGTCCAGTAAGCCGTTTACACCACCGGTGTTCCCTCCTGATATCTACGCATTTACCGCT  
ACACCAGGAATCCACTTACCTCTCCGACACTCTAGCCTCTCAGTATTCGGCGCACCCCTC  
CCGGTTGAGCCGGGAGATTTACACCAAACCTTAAAAAGCCGCCTACGCACCCTTTACGCC  
CAGTAACTCCGAACAACGCTTGCTGCCTACGTATTACCGCGGCTGCTGGCACGTAGTTAG  
CCGCAGCTGCTTCTGCAGGTACCGTCATAACCTTCCCTGCCGAAAGAGCTTTACACCCCG  
AAGGGCTTCATCGCTCACGCGGCGTGCCTGCATCAGAGTTTCCTCCATTGTGCTAGATTG  
CCCACTGCTGCATCCCATAGGCTGG

>Otu9433

CCAGCCTACGGGGTGCTGCAGTGGGGAATCTTGCGCAATGGGCGAAAGCCTGACGCAGCG

ACGCCGCGTGAAGGATGAAGGTCTTCGGATTGTAACTTCTGTAAAGTGGGAAGAAAAGC  
CCATCCCTAATACGGATGTGGTTATGACGGTACCATTAAGAAAGCACCGGCTAATCTCG  
TGCCAGCAGCCGCGGTAATACGAGAGGTGCAAGCGTTATTCGGAATTACTGGGCGTAAAG  
GGTGCCTAGACGGTATGCTAAGTCTGTTGTAAATCCTCCGGCCTAACCGGAGATCTGCA  
GTGAAACTGGCGTACTAGAGGGTGAAGAGAGAAGTGAATTCCCGGAGTAGCGGTAAA  
ATGCGTAGATCTCGGGAGGAACACCAATGGCGAAGGCAGCTTCTTGGCTCATTCCTGACG  
TTGAGGCACGAAAGCGTGGGGAGCAAATAGGATTAGAAACCCCCGTAGTCC

>Otu9442

CCAGCCTACGGGTGGCTGCAGTGGGGAATCTTGCGCAATGGACGAAAGTCTGACGCAGCC  
ACGCCGCGTGAGTGAAGAAGGCCTTCGGGCTGTAAAGCTCTGTCGGAGGGGACGAAAATG  
TTCTGGGTAAACAGCCCAGGGTACTGACGGTACCCTCAAAGGAAGCACCGGCTAACTTCG  
TGCCAGCAGCCGCGGTAATACGAGGGGTGCAAGCGTTGCTCGGAATTATTGGGCGTAAAG  
GGTAGGTAGGTGGTCTCATTTGTCTGATGTGAAAGCCTTGGGCTTAACCCAAGAAGTGCG  
TCAGAAACGGTGAGACTAGAGTCTTGAGAGGGTTCGTGGAATTCCCGGTGTAGCGGTGAA  
ATGCGTAGAGATCGGGAGGAACACCAGAGGCGAAGGCGGCGACCTGGACAGGTACTGACA  
CTCAACTACGAAAGCGTGGGGAGCAAACAGGATTAGAAACCCGGGGTAGTCC

>Otu9450

CCAGCCTATGGGTGGCTCCAGTGGGGAATCTTGCGCAATGGGCGAAAGCCTGACGCAGCG  
ACGCCGCGTGAGTGATGAAGGCCTTCGGGTTGTAAAGCTCTGTGGAGAGGGACGAATAAG  
GGCTGGCTAATATCCATCCTGATGACGGTACCTCTTTAGCAAGCACCGGCTAACTCTGTG  
CCAGCAGCCGCGGTAAGACAGGGGGTGCAAACGTTGTTTCGGAATTACTGGGCGTAAAGCG  
CGTGTAGGCTGCTCCAAAAGTCGGGTGTGAAAGCCCTGGGCTCAACCTAGGAAGTGCACT  
CGAAACTGCGGAGCTGGAGTCTTGAGAGGAAGGCGGAATTCTCGGTGTAGAGGTGAAAT  
TCGTAGATATCGGGAGGAACACCGGTGGCGAAGGCGGCCTTCTGGACAGTGACTGACGCT  
GAGACGCGAAAGCGTGGGGAGCAAACAGGATTAGAAACCCCCTAGTCC

>Otu9454

CCAGCCTACGGGGTGCAGCAGTGGGGAATTTTGGACAATGAGGGAAACCCCTGATCCAGCC  
ATGCCGCGTGAGTGAAGAAGGCCTTCGGGTTGTAAAGCTCTTTTGGTTCGGAAAGAAGGGG  
TTCGGGTGAATAACCTGGATTTTTGACGGTACCGGCAGAATAAGCACCGGCTAACTACGT  
GCCAGCAGCCGCGGTAATACGTAGGGTGCAGCGGTTAATCGGAATTACTGGGCGTAAAGA  
GTGCGTAGGCGGTCTTTCAAGTCCGTTGTGAAAGCCCCGGGCTCAACCTGGGAATGGCAG  
TGGAAGCTAGAAGACTTGAATCTGGCAGAGGGGGTGAATTCCACGTGTAGCAGTGAAA  
TGCGTAGAGATGTGGAGGAACACCGATGGCGAAGGCAGCCCCCTGGGCTGAGATTGACGC  
TCAGGCACGAAAGCGTGGGGAGCAAACAGGATTAGAAACCCCCTGTAGTCC

>Otu9465

CCAGCCTACGGGTGGCTGCAGTCGAGAATCTTCGGCAATGGACGCAAGTCTGACCGAGCG  
ACGCCGCGTGTTGGGATGAAGGCCTTCGGGTTGTAAACCACTGTCAGAGAGGATGAAATGC  
TGGTGGGTACTCCCATCAGTTTGACATATTCTCAGAGGAAGGACGGGCTAAGTTCTGTGCC  
AGCAGCCGCGGTAAGACGAACCGTCCAAACGTTATTCGGAATCACTGGGCTTAAAGGGTG  
CGTAGGCGGCGCGGAAAGTAGGGTGTGAAATCCCTCGGCTTAACCGAGGAACTGCGCTCT  
AAACTACCGTGCTCGAGGGAGATAGAGGTGAGCGGAACTTAGGGTGGAGCGGTGAAATGC  
GTTGATATCCTGAGGAACACCGGTGGCGAAAGCGACGTAAGTGGACCTCTTCTGACGCTGA  
GGCGCGAAAGCTAGGGGGGCAAACGGGATTAGAAACCCGAGTAGTCC

>Otu9467

CCAGCCTATGGGTGGCACCACTAGGGAATTTTCCACAATGGGCGAAAGCCTGATGGAGCA  
ACGCCGCGTGACAGGATGAATGCCTTAGGGTTGTAAACTGCTTTTATATGTGAAGAATATG  
ACGGTAGCATGTGAATAAGGATCGGCTAACTCCGTGCCAGCAGCCGCGGTCATACGGAGG  
ATCCAAGCGTTATCCGGAATTACTGGGCGTAAAGAGTTGCGTAGGTGGCATAGTAAGTTG  
ATAGTGAAGCGTGCGGCTCAACCGCATAACATTACCAAACTGCTAAGCTAGAGGACG  
AGAGAGGTAGATGGAATTTCCAGTGTAGGAGTGAAATCCGTAGATATTGGAAGGAACACC  
GATGGCGTAGGCAGTCTACTGGCTTGTTCTTGACACTAAGGCACGAAAGCGTGGGGAGCG  
AACGGGATTAGATACCCTTGTTAGTCC

>Otu9468

CCAGCCTACGGGTGGCTGCAGTGGGGAATATTGGACAATGAGCGAAAGCTTGATCCAACA  
ATATCACATAAGAGAAGAAGGGCTTTGTGCTTGTAATCTTGGTAGTTGATGAAGATAAT  
GACATTAGTCAACGAAAAAATGCCCTGGCTAACTTCGTGCCAGCAGCTGCGGTAATACGG  
AGGGGGCAAGTGTTACTCATAATGATTGGGCGTAAAGTGATGTAGATGGTGTATTAAAGT  
TCTTGATAAAAAATCCCTTCTATGCAGTAGGGAAAGATTGAATACTAATACTAGAGTCT

AATAGGAGAGAGCGGTACTGTAAGTGCAGGGGTAGAAATCCAGTAAAAGATTTATAGGACA  
AACAGCTAGCGAAGGCAGCAATCTTGGTTAAACTGACATTGAGGTACGAAAGCACAGGGA  
TCAAAAAGGATTAGATACCCGCGTAGTCC

>Otu9474

CCAGCCTACGGGGGGCAGCAGCCGAGAATATTCGACAATGGGCGAAAGCCTGATCGAGCG  
ATACCGCGTGGTGGATGAAGTGCTTCGGCACGTAAACATCTTTTATGAGGGAGGAAATTA  
TTGACGTTACCTCATGAATAAGGGGCTCCTAACTCTGTGCCAGCAGGAGCGGTAATACAG  
AGGCCCCGAGCGTTACCCGGAATCACTGGGCGTAAAGCGTGTGTAGGAGGTCGTATTAGT  
CGTCCGTTAAATCCCGGGGCTTAACCCCGGACTCGCGGGCGAAACGGTATGACTAGAGGG  
TGTGAGAGGTGAATGGAATCATGGTGTAGGGGTGAAATCCGTTGATATCATGGGGAACA  
CCGAAAGCGAAGGCAATTCCTGACTCTGAAACACGAAAGCGTGGGTAG  
CGAACGGGATTAGAACCCTCGTAGTCC

>Otu9481

CCAGCCTATGGGTTGCTCCAGTCGAGGATCTTTGGCAATGGGCGAAAGCCTGACCGAGCG  
ACGCCGCGTGTGGGATGAAGGCCCTTGGGTTGTAAACCACTGTCAGAGGGGATGAAGTGC  
AGGTGAGCTATCTCATCTGTTTGACATAGCCTCAGAGGAAGCACGGGCTAAGTTTCGTGCC  
AGCAGCAGCGGTAATACGAACGTGTGCAAACGTTATTTCGGAATCACTGGGCTTAAAGGGTG  
CGTAGGCGGTGCTTTAAGTAGGGTGTGAAAGCCCTCGGCTCAACCGAGGAATTGCGCCCT  
AAACTGGATGGCTGGAGTGAGTAGGGGTGTGTGGAACCTCCGGTGGAGCGGTGAAATGT  
GTTGATATCGGAAGGAACGCCGGTGGCGAAAGCGACACACTGGGTCTTAACTGACGCTGA  
GGCACGAAAGCCAGGGGAGCAAACGGGATTAGAAACCCTTGTAGTCC

>Otu9486

CCAGCCTATGGGGGGCTCCAGTCGAGAATCATTCGCAATGGGCGAAAGCCTGACGATGCG  
ACGCTGCGTGAGCGATGAAGGCCCTTCGGGTGCTAAAGCTCTTTCGCCGGGGAACAAGGGA  
GGATGGCTAATATCCATCCGACTTGAGGGTACTCGGTAAAGAAGCACCGGCTAACTCCGT  
GCCAGCAGCTGCGGTAATACGGAGGGTGCAAGCGTTAATCGGATTTATTGGGCGTAAAGG  
GGGCGTAGGCGGGAAGGCAAGTCAGATGTGAAATTCAGGGCTTAACCTTGAGCTGCAT  
TTGAAACTACCTTTCTTGAGGAAAGGCGGAGAAAACGGAATTCACAAAGTAGCGGTGAAA  
TGCGTAGATATGTGGAAGAACACCTGTGGCGAAAGCGGTTTTCTAGCTTATTCCTGACGC  
TGAGGCCCGAAAGCTAGGGGAGCAAACAGGATTAGAAACCCTAGTAGTCC

>Otu9489

CCAGCCTACGGGAGGCAGCAGTGGGGAATCTTGCACAATGGAGGAAACTCTGATGCAGCG  
ACGCCGCGTGAGCGATGAAGCCCTTCGGGTGCTAAAGCTCTTTCGACGGGAACGATAATG  
ACGGTACCCGAAGAAGAAGCTGCGGCTAACTACGTGCCAGCAGCCGCGGTGATACGTAGG  
GTGCAAGCGTTAATCGGAATTACTGGGCGTAAAGCGCACGTAGGCGGCTTTGCAAGTCGG  
ATGTGAAATCCCTCGGCTTAACCAAGGAAGTGCATCCGAAACTGCAGAGCTTGAGTACTT  
AAGAGGATCGCGGAATTCCTGGTGTAGAGGTGAAATTCGTAGATACCGGGAGGAACACCA  
GTGGCGAAGGCGGCGATCTGGGAAGATACTGACGCTGAGGTGCGAAAGCGTGGGGAGCAA  
ACAGGATTAGAGACCCGAGTAGTCC

>Otu9497

CCAGCCTATGGGTGGCAGCAGTAGGGAATATTGCTCAATGGGCGCAAGCCTGAAGCAGCA  
ATGCCGCGTGAGGATGAAGGCCCTTCGGGTGCTAAACTTCTTTTGTGAGGGATGAAGAAA  
TTTGATTATAATAATCCGAAGATTTGACCGTACCTGAAGAATAACCACCGGCTAACTCCGT  
GCCAGCAGCTGCGGTAATACGGAGGGTGGAAGCGTTGATCGGATTGACTGGGCGTAAAGG  
GAGCGTAGGCGGCTTGATAAGTCGATGGTGAAATTTCTGGGCTTAACCCAGAAGCTGCTG  
TTGAAACTATCAAACCTAGAGGATATTAAGGGAAAGCGGAATACCACATGTAGCGGTGAAA  
TGCGTAGATATGTGGTAGAACACCGGTGGTGAAGACGGCTTTCTGTGATATACCTGACGC  
TGAGGCTCGAAAGTATGGGGATCAAACAGGATTAGAAACCCCGTGGTCC

>Otu9500

CCAGCCTATGGGGGGCACCAGTCGAGAATTTTTCTCAATGGGCGAAAGCCTGATGGTGCG  
ACGCCGCGTGAGGGATGAAGGTCTTCGGATTGTAAACCTCTGTCACCGGGGAAGAAACGC  
TACGGGTAAACAGCCCGTAGCCTGACTTAACCCGGAGAGGAAGCAGTGGCTAACTCTGTG  
CCAGCAGCCGCGGTAATACAGAGACTGCGAGCGTTATTTCGGATTCACTGGGCGTAAAGGG  
TGCGCAGGTGGCCGGGTGTGTGAGGCGTGAAAGCCCGGAGCTTAACTCCGGAATTGCACC  
TCAAACCTACACGGCTAGAGCATTTGGAGAGGGGAGCAGAAATTCACGGTGTAGCAGTGAAAT  
GCGTAGATATCGTGAGGAATACCAGAGGCGAAGGCGGCTCCCTGGACAATTGCTGACACT  
CAGGCACGAAAGCGTGGGGAGCAAAGGGATTAGAAACCCTCGTAGTCC

>Otu9501



CCAGCCTATGGGGGGCAGCAGTCGAGAATTTTTCTCAATGGGCGAAAGCCTGAAGGAGCG  
ACGCCGCGTGGGGGATGAAGGGTTTTGATCCGTAAACCCCTGTCATTTGCGAACAAACCC  
TGGAGTTTAAGAGATGCCAGGCTGATTGTAGCGAAAGAGGAAGGGACGGCTAACTCTGTG  
CCAGCAGCCGCGGTAATACAGAGGTCCCAAGCGTTGTTTCGATTCACTGGGCGTAAAGGG  
TGCGTAGGTGGCATGGTAAGTTTGATGTGAAATCTCCGGGCTTAACCCGAAATGGCATT  
GAATACTATTGTGCTGGAGGTTTGGAGGGGGGACTGGAATTCTCGGTGTAGCAGTGAAAT  
GCGTAGATATCGAGAGGAACACCAGTGGCGAAGGCGAGTCCCTGGACAACACCTGACACT  
GAGGCACGAAAGCTAGGGGAGCAAACAGGATTAGAAACCCCACTAGTCC

>Otu9505

CCAGCCTACGGGGGGCTCCAGTGGGGAATCTTGACAAATGGGCGAAAGCCTGATGCAGCC  
ATGCCGCGTGTGTGAAGAAGGCCTTCGGGTGTAAAGCACTTTAAGAGGGGAGAAAAGGG  
TAGTCGTTAATAGCGCTATCTGTGATGTTACCCTCAGAATAAGCACCGGCAAACCTTCGT  
GCCAGCAGCCGCGGTAATACGAAGGGTGCAGCGCTTAATCGGAATTACTGGGCGTAAAGA  
GCACGTAGGCGGTCTGATAAGCGGAATGTGAAATCCCCGGGCTTAACCTGGGAACCTGCAT  
TCCGAACCTGTCAGGCTAGAGTATGATAGAGGTGAGCGGAATTTCTGTGTAGCGGTGAAA  
TGCGTAGATATAGGAAGGAACATCAGTTGCGAAGGCGGCTCACTGGATCAATACTGACGC  
TGAGGTGCGAAAGCGTGGGTAGCGAACAGGATTAGAACCCCTGTAGTCC

>Otu9506

CCAGCCTATGGGGGGCTCCAGTAGGGAATATTGGGCAATGGGCGCAAGCCTGACCCAGCC  
ATGCCGCGTGAAGGATGAAGGTCCACAGGATTGTAAACTCTTTTATCGGGGAATAAGGC  
AGATGTAACCTCATCTGATTGAAGGTACCCGAGGAATAAGCACCGGCTAACTACGTGCCAG  
CAGCCGCGGTAATACGTAGGGTGCAAGCGTTGTCCGGATTTACTGGGTTTAAAGGGTGCG  
TAGGCGGTTTTATAAGTCAGTGATGAAATGTCGGGGCTCAACCCCGTACCTGTTACTGAT  
ACTGCGAACTTGAGAATGGATGAGGTAGCTGGAATGTGTGGTGTAGCGGTGAAATGCGT  
AGAGATCACACAGAACACCAATTGCGAAGGCAGGTTACTGGGCCATTTCTGACGCTGAGG  
CACGAAAGCGTGGGGAGCAAACAGGATTAGAAACCCCTGGTAGTCC

>Otu9524

CCAGCCTACGGGTTGCTCCAGTGGGGAATCTTTCGCAATGGGCGAAAGCCTGACGAAGCG  
ACGCCGTGTGTGTGATGAAGGCCTTCGGGTGTAAAGCACTTTCGCCTGGGAACAAGAAA  
CTTTAGCTAATAACTAAGGAATTTGAGAGTATCAGGTAAAGAAGTACCGGCTAACTACGT  
GCCAGCAGCTGCGGTAATACGTAGGGTACAAGCATTAAATCGGATTTATTGGGCGTAAAGG  
GCGCGTAGGCGGAGATGCAAGTCAGATGTGAAATCCCGAAGCTCAACTTCGGAACAGCAT  
TTGAAACTACATCCCTAGAGGATAGACGGAGAAAACGGAATTCACACAAGTAGCGGTGAAA  
TGCGTAGATATGTGGAAGAACACCAGTGGCGAAGGCGGTTTTCTAGTTTATACCTGACGC  
TGAGGCGCGAAAGCAAGGGGAGCAAACAGGATTAGAAACCCCTAGTAGTCC

>Otu9533

CCAGCCTATGGGAGGCAGCAGTGTGGAATCTTGGGCAATGAGGGAAACCTTGACCCAGCG  
TTATCGCCAGGGTGATTAAAAGCTGTAGAAATAACCAGGCTCTAAATCTCTCAGGAGAGG  
TCTTCAAACCGAGGGGATCTTCTGTATTCCCGGACAATCTCGTGCCAGCAGTCGCGGTA  
ATACGGGAGGGAAGAGTGCTGCTCGTCGCGACTGGGAGTACGAGTTCGTAGGCGGCCTAT  
GCTTCAGGCCTCGAGTGGTTACGGAGTAGCCGTGAATGGGGGGTTGTGCGAGAAGGCTAG  
AGTGCTTCGAGGGGTCGATGGTATTGCTGGATTAAACGTTGGAATGTGACTGATGCCTGCA  
AGAGGACCGGAGGCGAAGGCGATCGACCGGAAGTTACTGACGCTCAAGAACGAAATCGGA  
GGGAGCGAACGGGATTAGAGACCCTCGTAGTCC

>Otu9538

CCAGCCTATGGGGGGCACCAGTGAGGAATTTTCCGCAATGGGCGAAAGCCTGAAGGAGCG  
ACGCCGCGTGGGGGATGAAGGGCTTCGGCTCGTAAACCCCTGTCATTTGCGAACAAACCT  
TACGATTGAATAGATCGTGAGCTGATTGTAGCGAAAGAGGAAGGGACGGCTAACTCTGTG  
CCAGCAGCCGCGGTAATACAGAGGTCCCAAGCGTTGTTTCGATTCACTGGGCGTAAAGGG  
TGCGTAGGTGGCAGGGTAAGTCTGACGTGAAATCTCCGGGCCTAACCCGAAACTGCGTC  
GGATACTATCCGGCTAGAGGATTGGAAGGGAGACTGGAATACTTGGTGTAGCAGTGAAAT  
GCGTAGATATCAAGTGGAACACCAGTGGCGAAGGCGAGTCTCTGGACAATTCCTGACGCT  
GAGGCACGAAAGCCAGGGGAGCAAACGGGATTAGAGACCCCGGTAGTCC

>Otu9544

CCAGCCTATGGGGTGCTGCAGTCGAGAATCTTCCACAATGGACGAAAGTCTGATGGAGCG  
ACGCCGCGTGGTTGATGAAGTCCTTCGGGACGTAAAAACCTTTTATGGAGGAGGAAATTT  
TGACGTTACTCCATGAATAAGGGGCTCCTAACTCTGTGCCAGCAGGAGCGGTAATACAGA  
GGCCCCAAGCATTATCCGGAATCACTGGGCGTAAAGGGTGTGTAGGCGGTTATGTTAGTC

TTTCGTGAAAAGATCTTCGGCTTAACCGAGGGGACGCGGGAGAAACGGCACAACCTTAGAGG  
TTGCGAGAGGTAAAGGGAACCTCATAGTGTAGGGGTGAAATCCGTTGATATTATGGGGAAC  
ACCAAATGCGAAGGCACTTTACTGGCGCACACCTGACGCTGAAACACGAAAGCGTGGGAA  
TCGAACGGGATTAGAGACCCCTGTAGTCC

>Otu9546

CCAGCCTACGGGGGGCTGCAGTGGGGAATATTGGACAATGGGGGAAACCTGATCCAGCG  
ACGCCGCGTGTGTGAAGAAGGCCTGCGGGTTGTAAAGCACTTTTAGTGGGGACAAAAAGC  
CATCGCCTAACACGCTGTGGTCTTGATTTAACCCAAAGAAAAAGCACCGGCTAACTCTGT  
GCCAGCAGCCGCGGTAATACAGAGGGTGCAGCGTTAATCGGAATTACTGGGCGTAAAGC  
GCGCGTAGACGGTTTTGTAAAGTCAGATGTGAAATCCCTGGGCTCAACCTGGGAACTGCAT  
TTGAGACTGCATGGCTTGAGTGTGGGAGAGGTGAGTGGAATTTCCGGTGTAGCGGTGAAA  
TGCGTAGATATCGGAAGGAACACCTGTGGCGAAAGCGGCTCACTGGACCACAACCTGACGC  
TGATGCACGAAAGCTAGGGGAGCAAACAGGATTAGAGACCCCTGTAGTCC

>Otu9551

CCAGCCTACGGGTGGCTGCAGTGGGGAATATTGCGCAATGGCCGAAAGGCTGACGCAGCG  
ACGCCGCGTGTAGGATGAGGCCCTTCGGGGTGTAAACTACTGTTGCCCGGGACGAACGGC  
AGACTTTGGTCTGCGTGACGGTACCGGGTGAGGAAGCACCGGCTAACTCCGTGCCAGCAG  
CCGCGGTAATACGAGGGTGCAGCGTTGTCCGGAATCACTGGGCGTAAAGGGCGCGTAG  
GTGGCTTGGTAAAGGGGGCGGTGAAAGCCCCGGGGCTCAACCCCGGGTCTGCCGACCGACT  
GCTAGGCTAGAGCACACTAGAGGGCAAGTGGAATTCGGGTGTAGCGGTGGAATGCGTAGA  
TATCCGGAAGAACACCGGTGGCGAAGGCGGCTTGCTGGGGTGTGGCTGACACTGAGGCGC  
GACAGCGTGGGGAGCAAACAGGATTAGATAACCGCGTAGTCC

>Otu9552

CCAGCCTATGGGGCGCTGCAGTCGAGGATCTTCGGCAATGGGCGCAAGCCTGACCGAGCG  
ACGCCGCGTGGGCGATGAAGGCCTTCGGGTGTAAAGCCCTGTGAGGGGGAGAAAGGGA  
AACTTGATCTATCCCTGGAGGAAGCACGGGCTAAGTTCTGTGCCAGCAGCCGCGGTAAGAC  
GAACCGTGCGAACGTTGTTTCGGAATCACTGGGCTTAAAGGGCGCGTAGGCGGGCCGCCAA  
GTCTGTGGTGAAATCCCCCGGCTCAACCGGGGAACTGCCGTGGATACTGGAGGTCTCGAG  
GGAGGTAGGGGCATGCGGAGCTACGGGTGGAGCGGTGAAATGCGTTGATATCCGTAGGAA  
CTCCGGTGGCGAAGGCGGCGTGCTGGACCTCTTCTGACGCTGAGGCGCGAAAGCCAGGGG  
AGCGAACGGGATTAGATAACCCCTCGTAGTCC

>Otu9553

CCAGCCTATGGGAGGCTGCAGTGGGGAATCTTGCGCAATGGGCGAAAGCCTGACGCAGCA  
ACGCCGCGTGGAGGACGAAGGCCTTCTCGGTTGTAAACTCCTTTCGGCAGGGACGAAAAC  
ACCGACGGTACCTGCAGAAGAAGCCCCGGCCAACCTACGTGCCAGCAGCCGCGGTAATACG  
TAGGGGGCGAGCGTTGTCCGATTTATTGGGCGTAAAGAGCTCGTAGGCGGCTTGGTTAG  
TTGGGTGTGAAATCTCCAGGCTCAACCTGGAGGGGCCACCCAATACTGCCATGGCTAGAG  
TCCGGTAGGGGGCCACGGAATTCCTGGTGTAGCGGTGAAATGCGCAGAGATCAGGAGGAA  
CACCGGTGGCGAAGGCGGTGGCCTGGGCCGGAACCTGACGCTGAGGAGCGAAAGCGTGGGG  
AGCGAACAGGATTAGATAACCCAGTAGTCC

>Otu9555

CCAGCCTACGGGGGGCTGCAGTGGGGAATATTGCGCAATGGGCGAAAGCCTGACGCAGCG  
ACGCCGCGTGGAGGATGAAGGTCTTCGGATTGTAAACTTCTGTTAAGTGGGAAGAAAAGT  
CTATTCCCTAATACGGATAGATGTTGACGGTACCCTAGAGAAAGCACTGGCTAATCTCGT  
GCCAGCAGCCGCGGTAATACGAGAGGTGCGAGCGTTATTCGGAATTATTGGGCGTAAAGG  
GTGTGTAGACGGCATGTTAAGTCAACTGTTAAATTCTCCGGCCTAACCGAGTTCTGCGG  
TAGATACTGGCATACTAGAGGGTGGAAAGAGAGAAGTGGAATTCTCGGAGTAGCGGTAAAA  
TGCGTGGATCTCGAGAGGAACACCAATGGCGAAGGCAGCTTCTTGGTCCACTCCTGACGT  
TGAGACACGAAAGCGTGGGGAGCAAACAGGATTAGATAACCCTAGTAGTCC

>Otu9557

CCAGCCTACGGGGGGCTCCAGTCGAGAATCTTTCGCAATGGGCGCAAGCCTGACGAAGCGA  
CGCCGTGTGAGCGAAGAAGGCCTTCGGGTGTAAAGCTCTTTCGCTAGGGAACAAGAGAG  
GCTGGATAATAACCAAGTTAATTTGATGGTACTTGGTAAAGAAGCACCGGCTAACTCCGTG  
CCAGCAGCTGCGGTAATACGAGGGTGCAGGCATTGATCGGAATTACTGGGCGTAAAGGG  
CGCGTAGGCGGCAAGATAAGTCAGATGTGAAATTCCGGGGCTCAACCCCGGAGCTGCATT  
TGAAACTGTCTAGCTAGAGGTCAGTTAGGGAAAACGGAATTCCACGTGTAGCGGTGAAAT  
GCGTAGATATGTGGAAGAACACCAAGTGGTGAAGACGGTTTTCTGGGCTGATACTGACGCT  
GAGGCGCGAAAGCAAGGGGAGCGAACAGGATTAGATAACCCCTCGTAGTCC

>Otu9566

CCAGCCTACGGGTTGCTGCAGTAGGGAATCTTGCGCAATGGACGAAAGTCTGACACAGCA  
ACGCCGCGTGAGGGACGAAGGCTTTCTGAGTTGTAAACCTCTTTCGGCAGGAACGATTGT  
AACGGTACCTGCAGAAGAAGCACCGGCCAACTACGTGCCAGCAGCCGCGGTGATACGTAG  
GGTGAAGCGTTATTTCGGATTATTGTTGGGCGTAAAGAGCTCAGGCGGTTTCGATAAGTTGGG  
TGTGAAACCCCCAGGCTTAACCTGGGGCAGCCACCCAAAACCTGTCGTGACTAGAGTTTGG  
TAGGGGATCACGGAATTCTTGGTGTAGCGGTAGAATGCGCAGATATCAGGAGGAACACCA  
GTAGCGAAGGCGGTGATCTGGGCCAATACTGACGCTGAGGAGCGAAAGCGTGGGGAGCGA  
ACAGGATTAGATACCCTTGTAGTCC

>Otu9567

CCAGCCTATGGGGCGCAGCAGTGGGGAATCTTGCGCAATGGACGAAAGTCTGACGCAGCC  
ACGCCGCGTGAGTGAAGAAGGCCTTCGGGTGTAAAGCTCTGTTCGGGCGGGACGAAAATC  
TTAGACGTGAATAGCGTCTAGGACTGACGGTACCGCCAAAGGAAGCACCGGCTAACTTCG  
TGCCAGCAGCCGCGGTAATACGAGGGGTGCAAGCGTTGCTCGGAATTATTGGGCGTAAAG  
GGTAGGTAGGTGGTCTCATTTGTCTGGGGTGAAGCCTTGAGCTTAACCAAGAAGTGCC  
CCAGAAACGGTGAGACTGGAGTCTCGGAGAGGGTTCGTGGAATTCCTGGTGTAGCGGTGAA  
ATGCGTAGAGATCGGGAGGAACACCAGAGGCGAAGGCGGCGACCTGGAAGATTCTCTGACT  
CTGAAACACGAAAGCCAGGGGAGCAAACGGGATTAGATACCCGTGTAGTCC

>Otu9579

CCAGCCTATGGGAGGCAGCAGTGGGGAATCTTGCAACAATGGACGAAAGTCTGATGCAGCA  
ACGCCGCGTGAGGGGATGAAGCTTTTCGGAGTGTAACCCCTTTTCGACCCGGAAGAAAGCC  
CGCAAGGGTTTGACGGTACGGGTATAAGAAGCCCCGGCTAACTACGTGCCAGCAGCCGCG  
GTAAAACGTAGGGGGCCAGCGTTGCTCGGAATTACTGGGCGTAAAGGGTCCGTAGGCGGT  
GTGGCAAGTCGGTAGTGAATCTCAGAGCTTAACCTCTGAAACTGCGCTTGATACTGCTCG  
GCTAGAGGATCGGAGGGGGTAACGGAATTTATGGTGTAGCAGTGAATGCGTAGATATCA  
TAAGGAACACCGGTGGCGAAGGCGGTTACCTGGAAGATTCTTGACTCTGAAACACGAAAG  
CCAGGGGAGCAAACGGGATTAGATACCCTGGTAGTCC

>Otu9588

CCAGCCTATGGGGGGCTGCAGTGAGGAATATTGCACAATGGGCGAAAGCCTGATGCAGCG  
ACGCCGCGTGAGAGGATGACGGTCTTCGGATTGTAAACTCCTGTAAAGTGGGAAAAAGAC  
TTGTTCTTAATAGGAACGAGGGATGATGGTACCCTAAAGAAAGCACCGGCTAACTTCGT  
GCCAGCAGCCGCGGTAACACGAGGGGTGCAAACGTTATTTCGGAATCATTGGGCGTAAAGG  
GTACGTAGACGGCGAAATAAGTCAGTCATTAAATCTTCCAGCTTAACCTGGAACCTTGTGG  
CTGAAACTGATTGCTTGAGGATGGAAGAGAGAAGCGGAATTCTCGGGGTAGCGGTAAAA  
TGCGTAGATCTCGAGAGGAACACCGATGGCGAAGGCAGCTTCTTGGTCCATTTCTGACGT  
TGAGGTACGAAAGCGTGGGGAGCAAACAGGATTAGAAACCCCGTAGTCC

>Otu9595

CCAGCCTATGGGGGGCAGCAGTGGGGAATATTGGACAATGGGCGAAAGCCTGATCCAGCA  
ATGCCGCGTGAGTGAAGAAGGCCTTCGGGTGTAAAGCACTTTAGTTGGGGAGGAAGTTG  
TGTAAGTTTAAAGATAGCACAATTGACTGTACCCAAAGAATAAGCACCGGCTAACTCTGT  
GCCAGCAGCCGCGGTAATACAGAGGGTGCAGAGCGTTAATCGGAATTACTGGGCGTAAAGG  
GCGCGTAGGCGGTTTATTAAAGTTAGATGTGAAATCCCTGGGCTTAACCTAGGAAGTGCAT  
ATAATACTGATAAGCTGGAGTGCGGTAGAGGATAGTGGAATTTCCGGTGTAGCGGTGAAA  
TGCGTAGATATCGGAAGGAACACCGATGGCGAAGGCAGCTATCTGGACTGACACTGACGC  
TGAGGCGCGAAAGCGTGGGGAGCAAACAGGATTAGAGACCCTAGTAGTCC

>Otu9596

CCAGCCTATGGGTGCGAGCAGTGGGGAATTTTGGACAATGGGGGCAACCCTGATCCAGCC  
ATTCCGCGTGAGTGAAGAAGGCCTTCGGGTGTAAAGCTCTTTCGGCAGGAACGAAACGG  
GTTACGTAAATAGCGTAGCTTACTGACGGTACCTGAAGAAGAAGCACCGGCTAACTACGT  
GCCAGCAGCCGCGGTAATACGTAGGGTGCAGAGCGTTAATCGGAATTACTGGGCGTAAAGC  
GTGCGCAGGCGGTTTGTAAAGACAGGTGTGAAATCCCCGGGCTTAACCTGGGAATGGCGT  
TTGTTACTGGCAAGCTAGAGTGTGTCAGAGGGAGGTAGAATTCACAGTGTGGCAGTGAAA  
TGCGTAGAGATGTGGAGGAATACCGATGGCGAAGGCAGCCTCCTGGGATAACACTGACGC  
TCATGCACGAAAGCGTGGGGAGCAAACAGGATTAGATACCCAGTAGTCC

>Otu9599

CCAGCCTATGGGTGGCTGCAGTCGAGAATATTTGACAATGGAGGAAACCCTGATGCAGCG  
ACGCCGCGTGAGCGATGAAGCCCTTCGGGGTGTAAAGCTCTTTCGGCAGGGACGATTATG  
ACGGTACCTGCAGAAGCAGCTGCGGCTAACTACGTGCCAGCAGCCGCGGTAATACGTAGG

CAGCAAGCGTTGTTTCGGAGTTACTGGGCGTAAAGGGTGTGTAGGCGGTTCTCTAAGTTTG  
GTGTGAAATCTCCCGGCTCAACTGGGAGGGTGCGCCGAAAAGTGGGGGGCTAGAGTGCGG  
GATGGGAGAGTGGAATTCCTGGTGTAGCGGTGAAATGCGTAGATATCAGGAGGAACACCT  
GTGGTGTAGACGGCTCTCTGGACCGCAACTGACGCTGAGACACGAAAGCGTGGGGAGCAA  
AAAGGATTAGATACCCGTGTAGTCC

>Otu9607

CCAGCCTACGGGGGGCAGCAGTGGGGAATATTGGACAATGGGCGGAAGCCTGATCCAGCA  
ATGCCGCGTGTGTGAAGAAGGCCTGCGGGTTGTAAAGCACTTTCAGTGGGGAGGAACGAC  
TTTAAACTAATACTTTGAGGAGATGACGTTACCCACAGAAGAAGCACCGGCTAACTCTGT  
GCCAGCAGCCGCGTAATACAGAGGGTGCGAGCGTTAATCGGAATTACTGGGCGTAAAGG  
GTGCGTAGGTGGTTTGATAAGTTAGGTGTGAAAGTCCTGGGCTTAACCTGGGGATTGCGC  
CTGATACTGTTAGACTAGAGTACTGTAGAGGAAAGTGGAATTTCCGGTGTAGCGGTGAAA  
TGCGTAGATATCGGAAGGAACACCAGTGGCGAAGGCGACTTTCTGGACAGATACTGACAC  
TGAGGCACGAAAGCATGGGGAGCGAACAGGATTAGAGACCCTAGTAGTCC

>Otu9621

CCAGCCTATGGGTCGCTGCAGTGGGGAATATTGGACAATGGGCGCAAGCCTGATCCAGCC  
ATGCCGCGTGAGTGATGAAGGCCTTAGGGTTGTAAAGCTCTTTTAGCAGGGAAGATAATG  
ACGGTACCTGCAGAAAAAGCCCCGGCTAACTTCGTGCCAGCAGCCGCGTAATACGAAGG  
GGGCTAGCGTTGCTCGGAATTACTGGGCGTAAAGCGCACGTAGGCGGCTTCTTAAGTCGG  
TGGTGAAATCCTGGAGCTCAACTCCAGAACTGCCTTCGATACTGGGAAGCTCGAGTCCGG  
GAGAGGTGAGTGGAAGTGCAGTGTAGAGGTGAAATGCGTAGAGATGTGGAGGAACACCT  
GTGGCGAAAGCGGCGCACTGGACCATAACTGACGCTGATGCACGAAAGCTAGGGGAGCAA  
ACAGGATTAGAAAACCCCGTAGTCC

>Otu9624

CCAGCCTATGGGGGGCAGCAGTGGGGAATCTTGACAAATGGAGGAACTCTGATGCAGCG  
ACGCCGCGTGAGCGATGACGCCCTTCGGGGTGTAAGCTCTTTCGGCAGGGAAGATAATG  
ACGGTACCTGCAGAAGCAGCTGCGGCTAACTACGTGCCAGCAGCCGCGTAATACGTAGG  
CAGCAAGCGTTGTTTCGGAGTTACTGGGCGTAAAGGGTGCGTAGGCGGCTTTTTAAGTTTG  
GTGTGAAATCTCCCGGCTCAACTGGGAGGGTGCGCCGAAACTGAGAGGCTAGAGTGTCG  
GAGAGGTAAGTGGAATTTCCGGTGTAGCGGTGAAATGCGTAGATATCGGAAGGAACACCT  
GTGGCGAAAGCGGCTCACTGGACCACAACCTGACGCTGATGCACGAAAGCTAGGGGAGCAA  
ACAGGATTAGATACCCCAGTAGTCC

>Otu9630

CCAGCCTACGGGTGGCAGCAGTGGGGAATTTTGCGCAATGGGGGAAACCTGACGCAGCA  
ACGCCGCGTGAGGATGAAGTACTTCGGTACGTAAACTCTTTCGACGGGGACGATAATGA  
CGGTACCCGTAGAAGAAGCTCCGGCTAACTTCGTGCCAGCAGCCGCGTAATACGAAGGG  
GGCTAGCGTTGTTTCGAATTACTGGGCGTAAAGCGCGCGCAGGCGGCTTCTCAAGTCAGG  
GGTGAAAGCCAGAGCTCAACTCTGGAAGTGCCTTGAAACTGTGGAGCTTGAGTACGGG  
AGAGGTGAGTGGAATTTCCAGTGTAGAGGTGAAATTCGTAGATATTGGGAAGAACACCGG  
TGCGGAAGGCGGCTCACTGGCCCGTTACTGACGCTCAGGCGCGACAGCGTGGGGATCAAA  
CAGGATTAGATACCCGGGTAGTCC

>Otu9632

CCAGCCTATGGGGGGCTCCAGTGAGGAATATTGCTCAATGGACGAAAGTCTGAAGCAGCA  
ACGCCGCGTGAGGGATGAAGGTGCTCTGCATTGTAAACCTCTGTAGTCGGGGAAAAATGG  
CGGGTTACTACCCGTTTGATGGTACCCGAAAAGTAAGGATCGGCTAACTACGTGCCAGCA  
GCCGCGGTAATACGTAGGATCCAAGCGTTGTCCGGATTTACTGGGTGTAAAGGGTGCGCA  
GGCGGACTGGTTAGTCAGAGGTGAAATCCCATCGCTCAACGATGGACCTGCCTTTGATAC  
TGCCAGTCTTGAATAAGCGAGAGATTTCGTGGAATTCGAGTGTAGCAGTGAAATGTGTAG  
ATATTCGGAAGAACACCAGAGGCGAAGGCAGCGAATTGGCGCTTTATTGACGCTCAGGCA  
CGAAAGCATGGGGATCAAACAGGATTAGATACCCTCGTAGTCC

>Otu9636

CCAGCCTATGGGAGGCTCCAGTGGGGAATATTGGACAATGGGTGAGAGCCTGATCCAGCC  
ATGCCGCGTGACAGGAAGAAGGCCTTCTGGGTGTAAACTGCTTTTGCCAGGGGATAAAAG  
ACCCTTGCGAGGGAAATTGAAGGTACCTGGTGAATAAGCCACGGCTAACTACGTGCCAGC  
AGCCGCGGTAATACGTAGGTGGCAAGCGTTGTCTGGATTTATTGGGTTTAAAGGGTGCGT  
AGGCGGCCCCGTAAAGTCAGTGGTGAATAACGGCAGCTCAACTGTGAGGTGCCATTGATA  
CTGCGGGGCTTGAGTATGGACGAGGTGGGCGGAATTGACGGTGTAGCGGTGAAATGCTTA  
GATATCGTCAAGAACACCGATAGCGAAGGCAGCTCACTAGGCCATAACTGACGCTGAGGC

ACGAAAGTGCGGGGATCAAACAGGATTAGAAACCCAGTAGTCC

>Otu9644

CCGGCCTACGGGTGGCAGCAGTAAGGAATATTGGACAATGGTCACAAGACTGATCCAGCC  
ATGCCGCGTGACAGGATGACAGCCCTATGGGTTCGTAAACTGCTTTTGTGCGAGAAAAAAC  
ACTCTACGTGTAGAGTGCTGATTGTATCGTAAGGATAAGGATCGGCTAACTCCGTGCCAG  
CAGCCGCGGTAATACGGAGGATCCAAGCGTTATCCGGATTCATTGGGTTTAAAGGGTGCG  
TAGGCGGAATGATAAGTCAGTGGTGAAAGCCTGTTGCTTAACAACAGAACTGCCATTGAT  
ACTGTCAATCTTGAGTACATTTGATGTGGGCGGAATGTGTCATGTAGCGGTGAAATGCTT  
AGATATGACACAGAACACCGATTGCGAAGGCAGCTCACAAAACGTGTAAGTGTGCTGAGG  
CACGAAAGCGTGGGTATCAAACAGGATTAGAGACCCGTGTAGTCC

>Otu9646

CCAGCCTATGGGGGGCAGCAGTGGGGAATTTTGGACAATGGGGGAAACCCTGATCCAGCA  
ACTCTGCGTGAGGGACGAAGGGCTTCGGCCCGTAAACCTCTTTTGCACGGGGCGAACACC  
CGCAAGGGTTTGACGGTACCGTGCGAATAAGCCACGGCTAACTATGTGCCAGCAGCCGCG  
GTAAGACATAGGTGGCGAGCGTTATTCGGAATTACTAGGCGTAAAGCGAGTGTAGGCGGA  
TGCTTAAGTCCGACGTTAAATCTCCAGGCTTAACTTGGAGCTGTCTCGTACGATACTGGGCA  
CCTCGAATGGGGTAGGGGGCAGCGGAATTCGCGGTGTAGCGGTGAAATGCGTAGATATCG  
GGAGGAACACCTATGGCGAAAGCAGCTGCCTGGGCCTCTATTGACGCTAAGACTCGAAAG  
CTGGGGGAGCAAACAGGATTAGATACCCCTAGTAGTCC

>Otu9651

CCAGCCTATGGGTTGCTGCAGTCAAGAACATTCGACAATGGGCGAAAGCCTGATCGAGCG  
ACGCCGCGTGCGGGAAGAAGCAGCTTTGCTGTGTAAACCGCTTTTTCGTGGGAAGAAGCTT  
TGACGGTACCACGAGAATAAGGGGTTGCTAACCTCGTGCCAGCAGCAGCGGTAATACGAG  
GACCCCGAGCGTTATCCGGAATCACTGGGCGTAAAGCGTGAGCATCTGGTTGTGTTAGTC  
CACGGTTAAATCCTACTGCTCAACGGTGGGACTGCGGTGGAAACGGCACGACTTGAACGG  
GTGAGAGGCAAGCGGAACGTGCAGTGTAGGGGTGAAATCCATTGATATTGCACGGAACAC  
CAAAAGCGAAAGCAGTCTACTAGTGCTCTGCTGACGGTCAATCACTAAAGCGTGGGGATC  
AAAAAGGATTAGAGACCCCCGTAGTCC

>Otu9652

CAGCCTACGGGAGGCAGCAGTGGGGAATCTTGCGCAATGGACGAAAGTCTGACGCAGCCA  
CGCCGCGTGAGTGAAGAAGGCCTTCGGGTTGTAAAGCTCTGTCTGCGGGACGAACATCG  
AAACAGTTAAGAGCTGGTTCGACTGACGGTACCGCAAAAGGAAGCACCGGCTAACTTCGT  
GCCAGCAGCCGCGTAATACGAGGGGTGCAAGCGTTGCTCGGAATTATTGGGCGTAAAGG  
GTAGGTAGGTGCTCTCATTTGTCTGGGGTGAAAGCCTTGGGCTTAACTCAAGAAGTGCC  
CGGAAACGGTGAGACTAGAGTGCTGGAGAGGGTCGTGGAATTCGCGGTGTAGCGGCGAAA  
TGCGTAGAGATCGGGAGGAACACCAGAGGCGAAGGCGGCGACCTGGACAGCTACTGACAC  
TCAACTACGAAAGCGTGGGGAGCAAACAGGATTAGAACCCGAGTAGTCC

>Otu9662

CCAGCCTACGGGATGCTCCAGTGGGGAATTTTGGACAATGGGCGAAAGCCTGATCCAGCA  
ACCCTGCGTGAGGGACGAAGGGCTTCGGCCCGTAAACCTCTTTTACATGGGACGAAACCC  
CGCAAGGGTGTGACGGTACCATGCGAATAAGCCACGGCTAACTATGTGCCAGCAGCCGCG  
GTAAGACATAGGTGGCGAGCGTTATTCGGAATTACTAGGCGTAAAGCGAGTGTAGGCGGA  
CTCTTAAGTCTGACGTTAAATCTCCGGGCTTAACTCGGAGCTGTCTGCGTACGATACTGAGAG  
CCTCGAATGGAGTAGGGGGCAGGGGAATTCGCGGTGTAGCGGTGAAATGCGTAGATATCG  
GGAGGAACACCTATGGCGAAAGCACCTGCCTGGGCTTCTATTGACGCTAAGACTCGAAAG  
CTGGGGGAGCAAACAGGATTAGATACCCGCGTAGTCC

>Otu9666

CCAGCCTATGGGGGGCACCAAGTGGGGAATTTTGGACAATGGGCGCAAGCCTGATCCAGCA  
ATGCCGCGTGTGTGAAGAAGGCCTTCGGGTTGTAAAGCTCTTTTGTGCGGGACGAAACGG  
TTTTGGCGAATAACCAAGACTACTGACGGTACCCGAAGAATAAGCACCGGCTAACTACGT  
GCCAGCAGCCGCGTAATACGTAGGGTGCGAGCGTTAATCGGAATTACTGGGCGCAAAGC  
GTGCGCAGGCGGTTGTATAAGCCAGATGTGAAATCCCCGGGCTCAACCTGGGAATGGCAT  
TTGGGACTGTACAGCTGGAGTGTGGCAGAGGAGACTAGAATTCCTGGTGTAGCAGTGAAA  
TGCGTAGATATCAGGAGGAATACCGATGGCGAAGGCAGGTCTCTGGGCTGACACTGACGC  
TCATGCACGAAAGCGTGGGGAGCAAACAGGATTAGAAACCCAGTAGTCC

>Otu9669

CAGCCTACGGGAGGCTGCAGCGAGGAATTTTGCACAATCGACGCAAGTCGGATGCAGCAA  
CGCCGCGTGGGGGAAGAAGGCCTTCGAGTTGTAAACCCCTTTTGTGAGGGAAGAAGATCT

GACGGTACCTCACGAATAAGTCACGGCTAACTACGTGCCAGCAGCCGCGGTAATACGTAG  
GTGGCGAACGTTGTCCGGATTACTGGGCGTAAAGCGCGCGCAGGCGGACCGATAAGTCA  
GAGGTGAAATCTCCCGGCTCAACTGGGAGGGGCCCCTTTGATACTGTCTGGTCTTGAGATGC  
CTAGAGGAGAGTGGAATTCCTGGTGTAGTGGTGAATGCGTAGATATCGGGAGGAACACC  
AGTGGCGAAAGCGGCTCTCTGGGGCGATCTGACGCTGAGGCGCGAAAGCGTGGGGAGCA  
AACCGGATTAGAGACCCAGTAGTCC

>Otu9673

CCAGCCTACGGGTCGCTGCAGTCGAGAATCTTTCACAATGGGGGCAACCCTGATGGAGCG  
ACGCCGCGTGAGGATAAGGTCTTCGGATTGTAACTCCTGTCATGCGAGAGCAAGACAT  
GGCAACATGTTTGATAGTATCGCAAGAGGAAGAGACGGCTAACTCTGTGCCAGCAGCCGC  
GGTAATACAGAGGTCTCAAGCGTTGTTTCGGAATAACTGGGCGTAAAGGGTGCCTAGGCGG  
CGGGGAAAGTCGGGTGTGAAATTTGAGGGCTCAACCCTCACAAAGCACCTGATACTACTC  
TGCTCGAGACCTGAAGAGGAGCTTGGAATTTCTCAGTGTAGCAGTGAAATGCGTAGATTTT  
GAGAAGAACGCTCGCAGCGAAAGCGAAGCTCTGGTCAGCGCCTGACGCTGAGGCACGAAG  
GCTAGGGGAGCAAACAGGATTAGAAACCCTAGTAGTCC

>Otu9679

CCAGCCTATGGGGGGCTGCAGTGGGGAATATTGGACAATGGGCGAAAGCCTGATCCAGCA  
ATGCCGCGTGAGTGATGAAGGCCTTCGGGTTGTAAAGCTCTGTCTGGGAGGGACGAAAAAA  
CGGATTAACAAACCGTATTGACGGTACCTCCAAAGGAAGCACCGGCTAACTCTGTGCCAG  
CAGCCGCGGTAATACAGAGGGTGCAAGCGTTGCTCGGAATTACTGGGCGTAAAGCGCGTG  
TAGGCGGCGACATAAGTCGGGTGTGAAATCCCTCGGCTCAACCGAGGAAGTGCCTCGAT  
ACTGCGTTGCTTGAATGTCTGGAGGGGATGGCGGAATTCCCGGTGTAGAGGTGAAGTTCGT  
AGATATCGGGAGGAACACCTGTGGCGAAGGCGGCCATCTGGACGATTATTGACGCTGAGA  
CGCGAAAGCGTGGGTAGCAAACAGGATTAGAAACCCCGGTAGTCC

>Otu9682

CCAGCCTACGGGGGGCTCCAGCTAAGAATCTTCCGCAATGGGCGAAAGCCTGACGGAGCG  
ATGCCGCGTGAGGATGAAGGTCTTCGGATTGTAACTTCTGTCTATTAGAGAACAAGTGC  
CGCCGAGTAACCTACCGCCGGCTTGATAGTATCTGAAGAGGAAGGGACGGCTAACTCTGTG  
CCAGCAGCCGCGGTAATACAGAGGTCCCAAGCGTTGTTTCGGATTTCATTGGGCGTAAAGGG  
TGCGTAGGTGGCGGGGTAAGTTGGATGTGAAATCCTGGGGCTCAACCTAGAACTGCATT  
CAATACTGCCTTGCTAGAGTACTGGAGAGGAGATTGGAATTTACGGTGTAGCAGTGAAAT  
GCGTAGATATCGTAAGGAAGACCGGTGGCGAAGGCGGATCTCTGGACAGTTACTGACACT  
GAGGCACGAAGGCCAGGGGAGCAAACGGGATTAGATACCCCCGTAGTCC

>Otu9686

CCAGCCTATGGGTTGCAGCAGTAAGGAATATTGGTCAATGGACGCAAGTCTGAACCAGCC  
ATGCCGCGTGAGGATGAAGGCGCTATGCGTCGTAACTTCTTTTATACGGGAGAAAACC  
CCCCGAGTTCTCGGGGGCTGATAGTACTGTAAGAATAAGGGTCGGCTAACTTCGTGCCAG  
CAGCCGCGGTATACGAAGGACCCGAGCGTTATCCGGATTTCATTGGGTTTAAAGGGTGCG  
TAGGCGTCCTTGTAAGTTTTTCGGTGAAATCCTCAAGCTTAACTTGAGAACTGCCGAGAAT  
ACTACTAGGATTGAGTACAGTTGAAGCGGGCGGAATGTGTCATGTAGCGGTGAAATGCTT  
AGATATGACACAGAACACCAATTGCGAAGGCAGCTCGCTAAGCTGTAAGTACGCTGAGG  
CACGAAAGCGTGGGTAGCAAACAGGATTAGATACCCCCGTAGTCC

>Otu9687

CCAGCCTACGGGAGGCAGCAGTGGGGAATATTGCGCAATGGGCGAAAGCCTGACGCAGCA  
GCGCCGCGTGAGTGAGGAAGGCCTTCGGGTTGTAAAGCTCTTTCGGTTGGGAAGAAGGGA  
ATAACTATTAATAAGAGTTATTTTTGATGGTACCAAAGAAGAAGCACCGGCAAACTTCG  
TGCCAGCAGCCGCGGTAATGCGAAGGGTGCGAGCGTTATTCGGATTTATTGGGCGTAAAG  
GGTTCGTAGGCGGGAATGCAAGTCAAGTGTGAAATGTCCGGGCTTAACCCGAGAGTGCA  
TTTGAAGTGTTTTTCTTGAGTGTGAAGAGGGTGGTGAATTGCTGGTGTAGGAGTGAC  
ATCCGTAGAGATCAGCAGGAACATCGGAGGCGAAGGCGGCCGACTGGTCAATCACTGACG  
CTGAGGAACGAAAGCATGGGGAGCAAACAGGATTAGAAACCCAGTAGTCC

>Otu9688

CCAGCCTATGGGGCGCTGCAGTTTCGAATCATTCACAATGGGCGAAAGCCTGATGGTGCG  
ACGCCGCGTGAGGGATGAAGGTCTTCGGATTGTAAACCTCTGTACCCGGGGAAGAAACGC  
TTCAAGTTAATAGCTTGAAGCCTGACTTAACCCGAGAGGAAGCAGTGGCTAACTCTGTG  
CCAGCAGCCGCGGTAATACAGAGACTGCGAGCGTTATTCGGATTCACTGGGCGTAAAGGG  
TGCGCAGGCGGCTAAGTGTGTTAGGCGTGAAAGCCCGAGGCTTAACCTCGGAATTGCACC  
TAAACTATTTGGCTAGAGTACTGGAGAGGGAAACGGAATTCACGGTGTAGCAGTGAAAT

CGGTAGATATCGTGAGGAACACCAGAGGCGAAGGCGGTTTCCTGGACAGTTACTGACGCT  
CAGGCACGAAAGCGTGGGGAGCAAAGGGGATTAGATACCCCAGTAGTCC

>Otu9692

CCAGCCTACGGGGTGCAGCAGTGGGGAATCTTGGACAATGGGGGCAACCCTGATCCAGCC  
ATGCCGCGTGAGTGATGAAGGCCTTCGGGTGTAAACTCTTTCGACGGGGACGATAATG  
ACGGTACCCGTAGAAAGCTCCGGCTAACTTCGTGCCAGCAGCCGCGGTAATAAGAAGG  
GGGCTAGCGTTGTTTCGGAGTTACTGGGCGTAAAGGGCGCGTAGGCGGCTGTCCAAGTCGG  
GTGTGAAAGCCCAGGGCTCAACCCTGGAATAGCACTCGAGACTGGGCGGCTCGAGGACGG  
GAGAGGATGGTGGAATTCCTAGTGTAGAGGTGAAATTCGTAGATATTGGGAAGAACACCG  
GTGGCGAAGGCGGCCATCTGGACCGTTTCTGACGCTGAGGCGCGAAAGCGTGGGGAGCAA  
ACAGGATTAGAAACCCCTGTAGTCC

>Otu9693

CCAGCCTATGGGGGGCAGCAGTGACGAAATCTGGACAATGCGCGACAGCGTGATCTGGTA  
ATACTTCTTAAAGTGATGACGGTCAAGCGGTTGTAAAGCTTTTTATAATGACTAAATAATG  
ACAAGGTTAATTAGGAAAAAGTCCTGGCCAACCTCTGTGCCAGCAGCCGCGGTAATACAGA  
GGGGGCGAGCATTATTCATCTTGACTGGGCGTAAAGGGTGTGTAGGTGGCCAACCTCAATT  
ATGCGGTAAAGCCTGGGGTAGTACTCAGAACTGTGTTAATATTAATTCGGCTTGAGTTA  
GTGTGGGGTTATTAGAATTTTTGGTGGAGCAGTAAATGCTTAGATACTACAAGGAATAC  
CAAAGAGTGGAAGCAATTAACCTATTGCTAACTGACGCTGAGGCACGAAGGCATGGGGAGC  
AAACAGGATTAGAAACCCCCGTAGTCC

>Otu9695

CCAGCCTATGGGGGGCTGCAGTCGAGGATCTTCGGCAATGGGCGCAAGCCTGACCGAGCG  
ACGCCGCGTGTCGATGAAGGCCTTCGGGTGTAAAGCACTGTCGAGGGGGAGAAAAGGG  
AAACCTTGATCTATCCCCGGAGGAAGCACGGGCTAAGTTCGTGCCAGCAGCCGCGGTAAG  
ACGAACCGTGCGAACGTTGTTTCGGAATCACTGGGCTTAAAGGGCGCGTAGGCGGGCTGCC  
AAGTCTGTCTGTGAAATCCCCGCGGCTCAACCGCGGAACCTGCGATGGATACTGGCGGTCTAG  
AGGGGGGTAGGGGCATGCGGAACCTGTGGGTGGAGCGGTGAAATGCGTTGATATCCACAGG  
AACTCCGGTGGCGAAGGCGGCGTGCTGGACCTCTTCTGACGCTGAGGCGCGAAAGCTAGG  
GGAGCAAACAGGATTAGATACCCCTGTAGTCC

>Otu9698

CCAGCCTATGGGTGGCTCCAGTCGAGAATTTTTCTCAATGGGCGAAAGCCTGAAGGAGCG  
ACGCCGCGTGGGGGATGAATGGCTTCGGCCCGTAAACCCCTGTCATTTCGGGATCAATGCT  
TGTTTTCCCAACACGAGACAAGTTGATAGTACCGGAAGAGGAAGGGACGGCTAACTCTGTG  
CCAGCAGCCGCGGTAATACAGAGGTCCCAGGCGTTGTTTCGATTTACTGGGCGTAAAGGG  
TGCGTAGGTGGTTCGGTAAGTCTGATGTGAAATCTCCGGGCTCAACCCGGAATGGCATT  
GGATACTATTGACTAGAGGGTTGGAGGGGGGACTGGAATACTTGGTGTAGCAGTGAAAT  
GTGTAGATATCAAGTGGAACACCAGTGGCGAAGGCGAGTCCCTGGACAACCTCTGACACT  
GAGGCACGAAAGCTAGGGGAGCAAACAGGATTAGATACCCTCGTAGTCC

>Otu9702

CCAGCCTATGGGTGGCTCCAGGGCCTGAACATCTTTGGGGAAGCATGAACCACCGTAGCC  
GCAACCTGCATACAGGAAGCTGTGTCCTATGCGCGGGTCCGAGCCTATGCCATGCCTTAC  
GGCTTCGATATCGACACCAACATGATCTGCCAGATTGGCCAGTTCATTCATGAAGGAGAT  
GCGCGTAGCCAGCATGGCGTTGGCTGCATATTTGGTAAATTCTGCGGAGCGTACGTCCAT  
CCAGTAAGTACGTTTCGTGATTGCGGTTAAACGGCGCGTACAAGGCTTTCATATGATGATG  
TGCGGTACTGCCTTCTGGCGTGTTCATCACAGCCGATCACGATGCGATCAGGGCGCATGAA  
ATCTTCTACCGCCGCGCCTTCTTTCAGAACTCTGGATTAGATACCCTTGTAGTCC

>Otu9706

GGACTACCGGGGTATCTAATCCTGTTTGCTACCCACGCTTTCGTGCCTCAGCGTCAGTCA  
TGGTCCAGTAAGCTGTCTACACCACAGGTGTTCTCCTGATATCTACGCATTTACCGCT  
ACACCAGGAATTCGCTTACCTCTCCCATACTCTAGCATTCAGTCTCCGCCGCACCCTC  
CCAGTTGAGCCAGGAGATTTCAACACAGACTTAGAACACCGCCTACGCACTCTTTACGCC  
CAGTAATTCGGAACAACGCTTGCTGCCTACGTATTACCGCGGCTGCTGGCACGTAGTTAG  
CCGCAGCTTCTTCTTCGGGTACCGTCATTATCGTTCCCGTCGAAAGAGCTTTACACCCCG  
AAGGGCTTCATCGCTCACGCGGCGTGCCTGCATCAGGGTTTCCCCCATTTGTGCAAGATT  
CCCCTGCTGCGCCCCGTAGGCTGG

>Otu9710

CCAGCCTATGGGGCGCTCCAGTCAAGAACATTTGGCAATGGGCGAAAGCCTGACCATGCG  
ACGCCGCGTGCTGGATGAAGTCCTTCGGGACGTAAACAGCTTTTATGCGTGAAGAAGTAA

TTGACATTAGCGCATGAATAAGGGGCTCCTAACTCTGTGCCAGCAGGAGCGGTAATACAG  
AGGCCCCAAGCATTATCCGGAATCACTGGGCGTAAAGGGTGTGTAGGCGACGATATTAGT  
CTTTTGTAAAGTTCTCCGGCTTAACCGGGGAAATGCAGGAGAAACGGTATCGCTTTGAG  
GGCGCGAGAGGTACAGGGAACCTCATGGTGTAGGGGTGAAATCCGTTGATATCATGGGGAA  
CACCAAATGCGAAGGCACTGTACTGGCGCGTTTCTGACGCTGAAACACGAAAGCGTGGGT  
AGCGAACGGGATTAGATACCCGAGTAGTCC

>Otu9729

CCAGCCTACGGGGTGCAGCAGTAGGGAATTTTCCACAATGGACGAAAGTCTGATGGAGCA  
ACGCCGCGTGCAGGATGAATGCCTTAGGGTTGTAACTGCTTTTATGATCGACGATTATG  
ACGGTAGATCATGAATAAGGATCGGCTAACTCCGTGCCAGCAGCCGCGGTCATACGGAGG  
ATCCAAGCGTTATCCGGAATTACTGGGCGTAAAGAGTTGCGTAGGTGGCATGGTAAGTTG  
GTAGTGAAAGCGTTCGGCTCAACCGAATATACATTATCAAACTGCCAAGCTTGAGAGCG  
AGAGAGGTAAGTGAATTTCCTAGTGTAGGAGTGAAATCCGTAGATATTAGGAGGAACACC  
AATGGCGTAGGCAGGTTACTGGCTCGTCTCTGACACTAAGGCACGAAAGCGTGGGGAGCA  
AACGGGATTAGATACCCGAGTAGTCC

>Otu9754

CCAGCCTATGGGTGGCAGCAGTAAGGAATCTTTCGCAATGGGGGAAACCCTGACGAAGCG  
ACACCGCGTGAACGATGAAGGTCGGAAGATCGTAAAGTTCTTTTCTGAGGGAGAAATCT  
GATAGTACCTCAGGAATAAGCACCGGCTAACTCCGTGCCAGCAGCCGCGGTAAGACGGAG  
GGTGCAAGCGTTATCCGGAATTATTGGGTGTAAAGTGTCTCAGGTGGTCCTGTAAGTCA  
GATGTCAAAGCCTGAAGCTTAACCTCAGTCTGGTATCTGATACTGCAAGACTCGAGATCT  
CGAGAGGCAAGTGAATTTTTCGTGTAGGGGTAAAATCCGTTGATACGCAAAGGAACACC  
AAAAGCGAAAGCAGCTTGCTGGCGAGTTTCTGACACTTATGAACGAAAGCGTGGGGAGCG  
AAAAGGATTAGAGACCCTAGTAGTCC

>Otu9755

CCAGCCTATGGGGCGCACCAAGTGGGGAATATTGCGCAATGGGCGAAAGCCTGACGCAGCG  
ACGCCGCGTGAAGGATGAAGGCCTACGGGTGTAAACCTCTGTAAAGCGGGAAGAAAATT  
CTATTTCTAATAAAAATAGACATGACGGTACCGCTAGAGAAAGCACTGGCTAAACTCGTG  
CCAGCAGCCGCGGTAATACGAGTGGTGCAAGCATTATTTCGGAATCATTGGGCGTAAAGGG  
TGCGTAGGCGGCGCATTAAGTCTACTGTTAAATATCTCGGCCTAACCGAGAAGCTGCAGT  
GGATACTGGTGTGCTAGAGGATGGGAGAGAGAAGTGAATTTCTCGGAGTAGCGGTAAAT  
GCGTAGATCTCGAGAGGAACACCGATGGCGAAAGCAGCTTCTTGACCAATCCTGACGCT  
GATGCACGAAAGCGTGGGGAGCAAACAGGATTAGAAACCCTAGTAGTCC

>Otu9756

CCAGCCTATGGGGCGCAGCAGTGGGGAATATTGGACAATGGGCGAAAGCCTGATCCAGCC  
ATGCCGCGTGAGTGATGAAGGCCTTAGGGTTGTAAAGCACTTTTAATGGGGAGGAACTCC  
TGCGGGCGAACACCCGGCAGACTGACATTACCCATAGAAAAAGCACCGGCTAACTCCGTG  
CCAGCAGCCGCGGTAATACGGAGGGTGCAAGCGTTAATCGGAATTACTGGGCGTAAAGCG  
TGCGTAGGCGGCGCTTAAGTCAGATGTGAAAGCCCCGGGCTCAACCTGGGAACGGCATT  
TGAAACTGGCGGGCTAGAGTTAGGTAGAGGGGAGTGAATTTTCAGGTGTAGCGGTGAAAT  
GCGTAGAGACCTGAAGGAACACCAAGTGGCGAAGGCGACTCCCTGGACCCAACTGACGCT  
GAGGTACGAAAGCGTGGGTAGCAAACAGGATTAGATACCCGAGTAGTCC

>Otu9768

CCAGCCTATGGGGCGCAGCAGTGAAGGAATATTGGTCAATGGACGCAAGTCTGAACCAGCC  
ATGCCGCGTGAAGGATGAAGGCCTTCTGGGTGTAAACTTCTTTTACCTGGGAAGAAACC  
ACTATTTTCTAATAGTGTTGACGGTACCAGAGGAATAAGCACCGGCTAACTCCGTGCCAG  
CAGCCGCGGTAATACGGAGGGTGCAAGCGTTATCCGGATTACTGGGTTTAAAGGGTGTG  
TAGGCGGGCTGTAAAGTCAGTGGTTAAAGCCTGCAGCTTAAGTGTAGAATTGCCGTTGAT  
ACTGTCGTTCTTGAGTATATTTGATGTGGGCGGAATGTGTCATGTAGCGGTGAAATGCTT  
AGATATGACACAGAACACCGATTGCGAAGGCAGCTCACAAAACCTATAACTGACGCTGAGG  
CACGAAAGCGTGGGGATCAAACAGGATTAGAAACCCTCGTAGTCC

>Otu9775

CCAGCCTACGGGTGGCTCCAGGTTTCGCATAGCCCCGCATACAAGCTTCGTGCAGCGGACC  
TCGCCCATCTAAAGGATGTACATACGTTCGCGTCCGCATGCCGCCGAGCAACGCCTCCAC  
CGCCAACGTCTGCCCGTGTAGCACCGCGCTATCGAGTGGCGTATTGCCATTTCGCATCCAG  
CGCCTGCACATCCGCCTTCGCCCCAATCAGCAAATCGATAATCGGCGCAAACCCCCGCGC  
CGCCGCCACGTGCAACAGGCTCTGCCCCGTGCGGATACTCGCCGCCTATTTGTGCACCTGC  
GTTTAAACAAGAGTTTGGCCATGCTCGCCCGTCCGGTGAGCACCGCATACTGCAATGGGGT



CGACCCCGCCTCGCCATGCTGCGCATTACATCTGCCCCATGCGCAATTAGAAACCCGAG  
TAGTCC

>Otu9782

CCAGCCTATGGGAGGCTCCGGCCAATGCCTTACTGCGTATGTTGCTATTGCGTTATCTCT  
GTTATATCCTCTAATTTTCTCATTTATTTTACTATCTATTTCTTTTAGTGCTTCTGTGTT  
AAACGTTAAAGTTACGAAGTAACCCTTGCCGTTATTTTGTGTTTTTAATTCTTCATTTCAG  
TCTTATTCTCCACTGTGATGCTCTTTTTTTTATTGCATTCTTTGCAGTTGTTGCATCCGAT  
CGGCACATACAAAAGCCGTCGGTCGGACGGCTGTGTATTTGTTTTCTTGATTTTCGGATT  
TTTTATCAGTTTCGGATATAAACACATTTCTTTGAGTTATTTTCATTTATTTAATCGTAG  
CACCAGCACCCCAATATCCTTTGAATTACCTCGCCGAAGGCATTTTTTTCTATCTTCAGG  
TAATTATTATTTACTTCCTTTCATTAGAGACCCAGTAGTCC

>Otu9783

CCAGCCTATGGGTGGCAGCAGTGGGGAATCTTGACAATGGGCGAAAGCCTGATGCAGCA  
ACGCCGCGTGGGTGAAGAAGGTCTTTGGATTGTAAAGCCCTTTTCGGCTAGGAAGAAGGGC  
CTACGGATTAATACTCCGTAGGTTTGACGGTACTAGAAGAAGAAGCACCGGCTAATTCCG  
TGCCAGCAGCCGCGGTAATACGGAAGGTGCAAGCGTTATTCGAAATTACTGGGCGTAAAG  
AGCACGTAGGTGGGTATGTGTGTCGGATGTGAAATCCCTGGGCTCAACCTGGGAATTGCA  
TTCGAAACTGCATATCTTGAATACTTGAGGGTTGGAGAAATTCCAGGTGTAGGAGTGAA  
ATCCGTAGAGATCTGGAGGAATACCGGAGGCGAAGGCGTCCAAGTGGCAATGTATTGACA  
CTGAGGTGCGAAAGTGCGGGGAGCAAACAGGATTAGATACCCGGGTAGTCC

>Otu9792

CCAGTCTACGGGTGGCAGCAGTGGGGAATATTGGACAATGGGGGCAACCCTGATCCAGCG  
ACGCCGCGTGTGTGAAGAAGGCCTGCGGGTTGTAAAGCACTTTTAGTGGGGACAAAAGC  
GACGGACTAATACTCTGTGGTCTTGATTTAACCCTAAGAAAAAGCACCGGCTAACTCCGT  
GCCAGCAGCCGCGGTAATACGGAGGGTGCAAGCGTTATCCGGATTCACTGGGTTTAAAGG  
GTGCGTAGGCGGGTAAGTAAGTCCGTGGTGAAATCTCTGAGCTTAACTCAGAACTGCCG  
TGGATACTATTTGCCTTGAATATTGTGGAGGTGAGCGGAATATGTCATGTAGCGGTGAAA  
TGCTTAGATATGACATAGAACACCAATTGCGAAGGCAGCTCACTACACAATCATTGACGC  
TGAGGCACGAAAGCGTGGGGATCAAACAGGATTAGAGACCCGGGTAGTCC

>Otu9795

CCAGCCTATGGGGTGCACCAGTGGGGAATATTGGACAATGGGCGCAAGCCTGATCCAGCC  
ATGCCGCGTGAGTGATGAAGGCCCTAGGGTTGTAAAGCTCTTTTGTGCGGGAAGATAATG  
ACGGTACCGCAAGAATAAGCCCCGGCTAACTTCGTGCCAGCAGCCGCGGTAATACGAAGG  
GGGCTAGCGTTGCTCGGAATGACTGGGCGTAAAGGGCGCGTAGGCGGATGGTACAGTCAG  
ATGTGAAATTCCCGGGCTTAACCTGGGGGCTGCATTTGATACGTGCTGTCTAGAGTGCGG  
AAGAGGGTCGTGGAATTCACAGTGTAGAGGTGAAATTCGTAGATATTGGGAAGAACACCG  
GTGGCGAAGGCGGCGACCTGGTCCGTAACCTGACGCTGAGGCGCGAAAGCGTGGGGAGCAA  
ACAGGATTAGATACCCTGGTAGTCC

>Otu9801

CCAGCCTATGGGTTGCACCAGTGGGGAATTTTGGACAATGGGGGAAACCCTGATCCAGCC  
ATGCCGCGTGCGGGAAGAAGGCCTTCGGGTTGTAAACCGCTTTTAGCCGGAAAGAAGGGG  
TTTGGGTGAATAACCTAGGTCTTTGACGGTACCGGCGGAATAAGCACCGGCTAACTACGT  
GCCAGCAGCCGCGGTAATACGTAGGGTGCGAGCGTTAATCGGAATTACTGGGCGTAAAGA  
GTGCGTAGGCGGTTGCTGAAGTCTGCTGTGAAAGCCCTGGGCTCAACCTAGGAATGGCAG  
TGGAAGTACTAGGCGACTTGAATCTGGCAGAGGGGGGTGGAATGCCACGTGTAGCAGTGAAA  
TGCGTAGAGATGTGGCGGAACACCGATGGCGAAGGCAGCCCCCTGGGCTGAGATTGACGC  
TCAGGCACGAAAGCGTGGGGAGCAAACAGGATTAGAAACCCTCGTAGTCC

>Otu9806

CCAGCCTATGGGAGGCAGCAGTGGGGAATATTGGACAATGGGCGAAAGCCTGAGGGAGCG  
ACGCCGCGTGGGGGATGAATGGCTTCGGCCCGTAAACCCCTGTCATTTGCGAACAAACCT  
TTTCATTTAACAGACGAAAAGCTGATAGTAGCGGAAGAGGAAGGGACGGCTAACTCTGTG  
CCAGCAGCCGCGGTAATACAGAGGTCCCAAGCGTTGTTTCGGATTCACTGGGCGTAAAGGG  
TGCGTAGGCGGTTTGACAAGTCTGATGTGAAATCCCGCAGCTTAACTGCGGAAGTGCATT  
GGAAACTGTCTGGCTAGAGGAATGGAGGGGAGACTGGAATGCTTGGTGTAGCAGTGAAAT  
GCGTAGATATCAAGCGGAACACCAAGTGGCGAAGGCGAGTCTCTGGACATTTCTTGACGCT  
GAGGCACGAAAGCCAGGGGAGCAAACGGGATTAGATACCCGGGTAGTCC

>Otu9808

CCAGCCTATGGGAGGCAGCAGTGGGGATTTTTCGCAATGGAGGAACTCTGACGCAGCG

ACGCCGCGTGCGGGACGAAGCCTTTTCGGGGTGTAACCGCTGTCAGTGGAGAAGAGAATG  
GACGGTACCCACTGAGGAAGCCTCGGCTAACTACGTGCCAGCAGCCGCGGTAAGACGTAG  
GGGGCGAGCGTTGTTTCGGAATCACTGGGCGTAAAGAGCTCGTAGGCGGGGCTGCGCGTCG  
CGGAGTAAATCCATCTGCTTAACGGATGGTTTCATCTGCGATACGGCAGTTCTTGAGGACA  
GGAGAGGGAAGCGGAATTCCGAGTGTAGCGGTAAAATGCGTAGAGATTCGGAGGAACACC  
GGTGGCGAAGGCGGCTTCCTGGCCTGATTCTGACGCTGAGGAGCGAAAGCCAGGGGAGCG  
AACGGGATTAGAAACCCGCGTAGTCC

>Otu9815

CCCAGCCTACGGGGGGCTCCAGTAAGGAATATTGGACAATGGAGGCAACTCTGATCCAGC  
CATGCCGCGTGGAAGGATGAAGGTCCTATGGATTATAAACTTCTTTTGAACGGGAGAAAAC  
CCTAGGTGCTGTACCTAGGCTGATAGTACCGTTAGAATAAGGGTCGGCTAACTTCGTGCC  
AGCAGCCGCGGTAATACGAAGGACCCGAGCGTTATCCGGATTCATTGGGTTTAAAGGGTG  
CGTAGGCGGAACGATAAGTCAGTGGTGAAAGCCTGCAGCTTAACTGCAGAATTGCCATTG  
ATACTGTGATCTTGAGTACATTTGATGTGGGCGGAATGTGCCATGTAGCGGTGAAATGC  
TTAGATATGGCACAGAACACCGATCGCGAAGGCAGCTCACAAAACCTGTAAGTACGCTGA  
GGCACGAAAGCGTGGGGATCAAACAGGATTAGATACCCCAGTAGTCC

>Otu9816

CCAGCCTACGGGGGGCAGCAGTGGGGAATTTTACGCAATGGGCGAAAGCCTGACGTAGCG  
ACACCGCGTGAGCGACGAAGCCCTTTGGGGTGTAAGCTCTGTCGGCTGGAACGAAAAAA  
ATGACGGTACCAGCAGAGGAAGCATCGGCTAACTACGTGCCAGCAGCCGCGGTAAGACGT  
AGGATGCGAGCGTTGTCCGGATTTATTGGGCGTAAAGAGTTCGTAGGTGGTTTGTAAAGT  
CTGATGTTAAATACCGAGGCTCAACTTCGGAGGTGCATTGGATACTGGCAGACTTGGGTA  
CAGTAGAGGCAAGCGGAATTTCCAGTGTAGCGGTGAAATGCGTAGATATTGGGAAGAACA  
CCAGTGGCGTAGGCGGCTTGCTGGACTGTAAGTACACTGAGGAACGAAAGCCAGGGGAG  
CGAATGGGATTAGATACCCTTGTAGTCC

>Otu9820

CCAGCCTATGGGTGGCTGCAGTGGGGAATATTGGACAATGGGCGCAAGCCTGATCCAGCC  
ATGCCGCGTGAGTGATGACGGCCCTAGGGTTGTAAAGCTCTTTCGCAAGGGAAGAAAACT  
TAGTCTCTAACATAGGCTGAGGTTGACGGTACCTTGATAAGAAGCACCGGCTAACTACGT  
GCCAGCAGCCGCGGTAATACGTAGGGTGCGAGCGTTAATCGGAATTACTGGGCGTAAAGC  
GTGCGCAGGCGGTTTTGTAAAGTCAGATGTGAAATCCCCGAGCTCAACTTGGGAACTGCGT  
TTGAAACTACAAGACTAGAATATGTCAGAGAGGGGTAGAATTCACGTGTAGCAGTGAAA  
TGCGTAGAGATGTGGAGGAATACCAATGGCGAAGGCAGCCCCCTGGGATAATATTGACGC  
TCATGCACGAAAGCGTGGGGAGCAAACAGGATTAGAGACCCTAGTAGTCC

>Otu9829

CCAGCCTACGGGGTGCTGCAGTAGGGAATCTTGCGCAATGGACGAAAGTCTGACGCAGCA  
ACGCCATGTGTGGGATGACGCATTTCCGGTGTGTAAACCACTGTCGGCAGGGAATAAGCC  
TCGTCTTTGGCGAGGGATGAATGTACCTGCAGAGGAAGCCCCGGCTAACTTCGTGCCAGC  
AGCCGCGGTAATACGAGGGGGGCTAGTGTGTTTCGGAATCACTGGGCGTAAAGGGAGCGT  
AGGCGGGTGCTTAAGTTGGATGTTTAAAACCGGGGCCCAACCCCGGCGTGGCATTCAAAA  
CTGGGCATCTTGAATGGGACAGAGGCTGGTGGAAATTGGGGGTGTGGCGGTGGAATGCGTA  
GAGATTCCTAAGAACACCTGTTGCGAAGGCGGCCAGCTGGGTCCACATTGACGCTGAGGC  
TCGAAAGCGTGGGGAGCAAACAGGATTAGATACCCTTGTAGTCC

>Otu9838

CCAGCCTATGGGGTGCAACCAGCCAAGAACCTTCCACAATGGACGAAAGTCTGATGGAGCG  
ACGCCGCGTGGTTGATGAAGTGCTTCGGCACGTAAAGACCTTTTATGAGGGAAGAAGTTT  
ATTGACGGTACCTCATGAATAAGGGGCTCCTAACTCTGTGCCAGCAGGAGCGGTAATACA  
GAGGCCCCGAGCGTTATCCGGAATTATTGGGCGTAAAGGGTGTGTAGGTGGCGTAGTTAG  
TCGATTGTTAAAGACCCGGGCTTAACCTGGGGACTGGGATCGAAACGGCTATGCTTGAGT  
ATGTGAGAGGTAAGCGGGACTCAAGGTGTAGGGGTGAAATCCGTTGATATCTTGGGGAAC  
ACCAAAGCGAAGGCAGCTTACTAGCACATTACTGACACTGAAACACGAAAGCGTGGGTA  
GCGAATGGGATTAGAAACCCGCGTAGTCC

>Otu9842

CCAGCCTACGGGGCGCACCAAGTGGGGAATCTTGCACAATGGGGGAAACCTGATGCAGCG  
ACGCCGCGTGAGCGATGAAGCCCCTCGGGGTGTAAAGCTCTTTCGGCAGGGAAGATTATG  
ACGGTACCTGCAAAAGCAGCTGCGGCGAACTACGTGCCAGCAGCCGCGGTAATACGTAGG  
CAGCAAGCGTTGTTTCGGAGTTACTGGGCGCAAAGGGTGTGTAGGCGGCTTTTTAAGTTTG  
GTGTGAAATCTCCCGGCTCAACTGGGAGGGTGCGCCGAATACTGAGAGGCTAGAGTGTGG

GAGAGGAAAGTGGAAATTCCTGGTGCAGCGGTGAAATGCGTAGATATCAGGAGGAACACCT  
GCGGTGTAGACGGCTTTCTGGACCATCACTGACGCTGAGACACGAAAGCGTGGGGAGCAA  
ACAGGATTAGAGACCCTCGTAGTCC

>Otu9843

CCAGCCTATGGGTCGCTGCAGTCGGGAATTTTGCGCAATGGACGAAAGTCTGACGCAGCA  
ACGCCGCGTGCAGGAGGAAGGCCTTCGGGTGTAAACTGCTTTTATCTGTGACGATTTTG  
ACGGTAACAGAAGAATAAGGATCGGCTAACTCCGTGCCAGCAGCCGCGGTCATACGGAGG  
ATCCAAGCGTTATCCGGAATTACTGGGCGTAAAGAGTTGCGTAGGTGGCAAAGTAAGCAA  
ATAGTGAAATGATGCGGCTCAACCGCATGTCCATTATTTGAACTGCTTAGCTAGAACATA  
GGAGAGGTACCTGGAATTCCCAGTGTAGGAGTGAAATCCGTAGATATTGGGAGGAACACC  
GATGGCGTAGGCAGGGTACTAGCCTATTGTTGACACTAAGGCACGAAAGCGTGGGGAGCG  
AACGGGATTAGAAACCCTTGTAGTCC

>Otu9846

CCAGCCTACGGGGCGCAGCAGTGGGGAATCTTGCGCAATGGGCGAAAGCCTGACGCAGCG  
ACGCCGCGTGGGCGACGAAGGCCTTCGGGTGTAAAGCCCTGTGGGGCGGGACGAATAAG  
CGTTGGTCAAATAGGCCAGCGCCCTGCCGGTACCGCCTTAGCAAGCACCGGCTAACTCTG  
TGCCAGCAGCCGCGGTAAGACAGAGGGTGCGAACGTTGCTCGGAATTACTGGGCGTAAAG  
CGCGTGCAGGTGGTTCTCCACGTCCGGTGTGAAAGCCCGGGGCTCAACCCCGGAAGCGCG  
CTGGATACGAGGGAAGTGGAGGGCTGGAGAGGCAGGCGGAATTCCCGGTGTAGAGGTGAA  
ATTCGTAGATATCGGGAGGAACACCGGTGGCGAAGGCGGCCTGCTGGACAGCACCTGACA  
CTGAGACGCGAAAGCGTGGGTAGCAAACAGGATTAGATACCCCAGTAGTCC

>Otu9852

CCAGCCTTCGGGATGCAGCAGTAACGAATCTTCCGCAATGCACGAAAGTGTGACGGAGCG  
ACGCCGCGTGTGGGATGAAGTCTTTCGGAATGTAAACCACTGTCAGGGGTTAGAAAGTTC  
TGATCAACCCAGAGGAAGGCACGGCTAACTCTGTGCCAGCAGCCGCGGTAAGACAGAGG  
TGCCGAGCGTTAGGCGGAATCACTGGGCTTAAAGCGTGTGTAGGCGGGTCGATAAGTACC  
TTGTGAAATCCCACGGCTCAACCGTGGAAGTGTGGGTATACTGTGATCTTGAGCTACC  
TAGGGGCAGTCGGAACAAGTGGTGGAGCGGTGAAATGCGTAGATATCACTTGGAACGCCA  
ATGGTGAAAACAGACTGCTGGGGGTATGCTGACGCTGAGACACGAAAGCCAGGGGAGCAA  
ACGGGATTAGAGACCCTTGTAGTCC

>Otu9861

CAGCCTATGGGTGGCAGCAGTGGGGAATATTGGACAATGGGCGAAAGCCTGATCCAGCAA  
TACCGCGTGTGTGAAGAAGGCCTGAGGGTGTAAAGCACTTTCAATGGGAAGGAATACCT  
ATGGGCGAATACCCTGTAGACTGACATTACCCATAGAAGAAGCACCGGCTAACTCCGTGC  
CAGCAGCCGCGGTAATACGGAGGGTGCAGCGTTAATCGGAATTACTGGGCGTAAAGAGT  
GCGTAGGCGGTTCTGTTAAGTCAGATGTGAAAGCCCTGGGCTCAACCTGGGAAGTGCATTT  
GATACTGGCGAACTCGAGTTGAGTAGAGGAGAGTGGAATTTAGGTGTAGCGGTGAAATG  
CGTAGAGATCTGAAGGAACACCAAGTGGCGAAGGCGGCTCTCTGGACTCAAAGTACGCTG  
AGGTACGAAAGCGTGGGTAGCAAACAGGATTAGATACCCGAGTAGTCG

>Otu9872

CCAGCCTACGGGTCGCTGCAGTAGGGAATTTTGCGCAATGGGCGAAAGCCTGACGCAGCA  
ACACCGCGTGAGGGATGAAGCTTCTTGAGTGTAACCTCTGTGAGTGGGGACGAAGCCT  
GACGGTACCCACAGAGGAAGCATCGGCTAACTACGTGCCAGCAGCCGCGGTAAGACGTAG  
GATGCAGGCGTTGTCCGGGTTTATTGGGCGTAAAGAGTTCTGAGGTGGCATATCAAGTCT  
GGTGTAAATCCCGAAGCTCAACTTCGGACCGGCACTGGATACTGATAAGCTGGAGTACG  
GTAGAGGCAAGGGGAATTCCCAGTGTAGCGGTGAAATGCGTAGATATTGGGAGGAACACC  
GGTGGCGTAAGCGCCTTGCTGGGCCGTTACTGACGCTGAGGAACGAAAGCCAGGGGAGCA  
AATGGGATTAGATACCCCGGTAGTCC

>Otu9875

CCAGCCTACGGGGCGCTGCAGTCGAGAATTTTTCACAATGGGCGCAAGCCTGATGGAGCG  
ACGCCGCGTGGGGGATGAATGGCTTCGGCCCGTAAACCCCTGTCATTTGCGATCAACCGT  
TATTGTTTAAAGAGATGATAACCTGATAGTAGCGAAAGAGGAAGGGACGGCTAACTCTGTG  
CCAGCAGCCGCGGTAATACAGAGGTCCCAAGCGTTGTTTCGGATTCACTGGGCGTAAAGGG  
TGCGTAGGTGGCGAAGTAAGTCACCTGTGAAATCTCTGGGCTTAACTCAGAGCCTGCAGG  
CGAAACTGCCGTGCTGGAGTGTGGGAGAGGTGCGTGGAATTTCCCGGTGTAGCGGTGAAAT  
GCGTAGATATCGGGAGGAACACCTGTGGCGAAAGCGGCGCACTGGACCACAAGTACGCT  
GAGGCGCGAAAGCTAGGGGAGCAAACAGGATTAGAGACCCCCGTAGTCC

>Otu9877

CCAGCCTACGGGGCGCAGCAGTGGGGAATTTTCCGCAATGGGCGCAAGCCTGATCCAGCC  
ATGCCGCGTGAGTGATGAAGGTCTTCCGATTGTAACTTCTTTAGACCTAGATGAAGATT  
GCAAGGTAAATAATCTTGCAATTTGACAGTATAGGTAAAATAGGCCACGGCTAACTCTGT  
GCCAGCAGCCGCGGTAATACAGAGGTGGCAAACGTTGTCCGATTATTTGGGTGTAAAGG  
GCATGTAGGTGGTCTTGTAAAGTCAAAGGTGAAATGGCCCGGCTCAACCAGGTCATTGCCT  
TTGAAACTGCAGGGCTTGAGTACGGAAGAGGAGAGTGAATTTCCAGTGTAGCGGTGAAA  
TGCGTAGATATTGGGAGGAACACCGGTGGCGAAGGCGGCTCTCTGGTCCGAAACTGACAC  
TGAGATGCGAAAGCCAGGGGAGCAAACGGGATTAGAAACCCAGTAGTCC

>Otu9879

CTACGGGAGGCTGCAGTGGGGAATTTTGCGCAATGGGGGAAACCCTGACGCAGCAACGCC  
GCGTGGAGGATGAAGCCCTTGGGGCGTAAACTCCTTTTCGACCGGGACGATTATGACGGT  
ACCGGTGGAAGAAGCACC GGCTAACTCTGTGCCAGCAGCCGCGGTAATACGTAGGGGGCA  
AGCGTTGTTCCGAATCACTGGGCGTAAAGGGAGCGTAGGCGGGGAAATAAGTTAGAAGTT  
TAATGTCCGGGCTTAACCCGGAATCTGCTTCTAATACTGTTTTTCTTGAGTATTGGAGAG  
GGAGATGGAATTCCAGGTGTAGCGGTGGAATGCGTAGATATCTGGAAGAACACCAGCTGC  
GAAGGCGGTCTCCTGGCCAAATACTGACGCTGATGCTCGAAGGCTAGGGGAGCAAACAGG  
ATTAGATACCCCCGTAGTCC

>Otu9887

CCAGCCTATGGGTTGCTCCAGTCGAGAATCTTCCACAATGGACGAAAGTCTGATGGAGCG  
ACGCCGCGTGATTGATGAAGTCCCTTTGGGACGTAAAGATCTTTTGTGAGGGATGAAGTT  
TATTGACCGTACCTGAAGAATAAGAGGCTCCTAATCTCGTGCCAGCAGGAGCGGTAATAC  
GAGAGCCTCGAGCGTTATCCGGAATTATTGGGCGTAAAGGGTGCGTAGGTTGTTTTGTTA  
GTCATTTGTTAAACCCCGGGCTTAACCTGGGGCAGGCAAGTGAAACGGCAAGACTTGAA  
AGTGTGAGAGGAGTACGGAACCTATGGTGTAGGGGTGAAATCCGTTGATATCATAGGGAA  
CACCAAATGCGAAGGCAGTACTCTGGCGCATATTTGACACTGAAGCACGAAAGCGTGGGT  
AGCGAATGGGATTAGAAACCCTAGTAGTCC

>Otu9890

CCAGCCTACGGGGGGCAGCAGTTAGGAATTTTGCGCAATGGACGAAAGTCTGACGCAGCG  
ACATCGCGTGAAAGGATGAAGGCCCTCGGGTCGTAAACTTCTTTTTTCCGGCCATGAAGGC  
CGGTAGAATCAGTGACTACTAACTACGTGCCAGCAGTCGCGGTAATACGTAGGTCACAAG  
CGTTACCCGGTTTTATTGGGCGTAAAGAGTCTGTAGGTGGTTTTTTAAGTCTTGTTTTCAA  
AGACCTCGGCTCAACCGAGGACAGGGGCAGGATACTGGAAGACTAGAGTGATATCGGGGT  
TACTGGAATTTGTAGTGTAGGGGTAAATCCGTGGATACTACAAAGAACACCAAGCGCGA  
AGGCGGGTAACCGAGGTATATACTGACACTCAGAGACGAAAGCTAGGGTAGCCAATCAGAT  
TAGATACCCGAGTAGTCC

>Otu9902

CCAGCCTATGGGTCGCTGCAGTGGGGAATCTTGCAACAATGGGGGAAACCCTGATGCAGCG  
ACGCCGCGTGAGCGATGAAGCCCTTCGGGGTGTAAGGCTCTTTTCGGCAGGGAAGATTATG  
ACGGTACCTGCAAAAGCAGCTGCGGCTAACTACGTGCCAGCAGCCGCGGTAATACGTAGG  
CAGCGAGCGTTGTTTCGAGTTACTGGGCGTAAAGGGTGTGTAGGCGGTTGTTTAAGTTGA  
ATGTGAAATCCCCGGGCTCAACCTGGGAACTGCATCCAAAACCTGGCGAGCTAGAGTATGG  
TAGAGGGTGGTGGAATTGCCTGTGTAGCGGTGAAATGCGTAGATATAGGAAGGAACACCA  
GTGGCGAAGGCGACCACCTGGACTGATACTGACACTGAGGTGCGAAAGCGTGGGGAGCAA  
ACAGGATTAGAAACCCGTGTAGTCC

>Otu9910

CCAGCCTATGGGGTGACAGCAGTCGAGAATTTTTTCAACAATGGGCGAAAGCCTGATGGAGCG  
ACGCCGCGTGGGGGACGAATGGCTTCGGCCCGTAAACCCCTGTCATTTCGCGATCAAACCT  
TGGTGTTTTAAGAGATGCCAAGCTGATAGTAGCGGAAGAGGAATGGACGGCTAACTCTGTG  
CCAGCAGCCGCGGTAATACAGAGGTCCCAGCGTTGTTTCGATTCACTGGGCGTAAAGGG  
TGCGTAGGTGGTGGAGCAAGTCGGATGTGAAATCTCGGAGCTTAACCTCCGAAACGGCATT  
GGAAACTGCTCTGCTCGAGGGTCGGAAGGGGGACTGGAATTCTCGGTGTAGCAGTGAAAT  
GCGTAGATATCGAGAGGAACACCGGTGGCGAAGGCGAGTCCCTGGACGACTCCTGACACT  
GAGGCACGAAAGCTAGGGGAGCAAACAGGATTAGATACCCCCGTAGTCC

>Otu9911

CAGCCTACGGGGTGACAGCAGTGGGGAATATTGCGCAATGGGGGAAACCCTGACGCAGCGA  
CGCCGCGTGGGTGAAGAAGGCCCTTCGGGTTGTAAAGCCCTTTCGGTAGGGGAGAAGGGTA  
TTGTGGTGAATAGCCATAGTATTTGATGGTACCTAAAGAAGAAGCACCGGCTAACTTCGT  
GCCAGCAGCCGCGGTAATACGAAGGGTGCAGCGTTGTTTCGGAATTATTGGGCGTAAAGG

GTTCGTAGGCGGGAAGATAAGTAAAGTGTGAAATCCCAGGGCTAAACCTTGGAGAGTCAT  
TTTAGACTGTTTTTCTTGAGTATCTGAGAGGGTGGTGGAATTGCTGGTGTAGGAGTGACA  
TCCGTAGAGATCAGCAGGAACATCGGAGGCGAAGGCGACCACCTGGCAGAGTACTGACGC  
TGAGGAACGAAAGCGTGGGGAGCAAACAGGATTAGAAACCCAGTAGTCC

>Otu9913

CCAGCCTATGGGTGGCACCAGTGGGGAATTTTGCGCAATGGGGGAAACCTGACGCAGCA  
ACGCCGCGTGAGTGATGAAGGCCTTCGGGTCGTAAAGCTCTGTCAGAGGGAAAGAAGTGT  
AGGAGGGTTAATACCCCTTTTATTTGACGGTACCGCTAAAGGAAGCACCGGCTAACTCCG  
TGCCAGCAGCCGCGGTAATACGGGGGGTGTAGCGTTGTTTCGGAATTATTGGGCGTAAAG  
AGCGTGTAGGCGGCTGGATAAGTCAGATGTGAAAGCCCTGGGCTTAACCCAGGAAGTGCA  
TTTGAAGTGTCCGGCTTGAGTAAGGGAGAGGAAAGTGGAATTCCTGGTGTAGAGGTGAA  
ATTCGTAGATATCAGGAGGAACACCGGTGGCGAAGGCGACTTTCTGGCCCTATACTGACG  
CTGAGACGCGAGAGCGTGGGTAGCAAACAGGATTAGATACCCCTGTAGTCC

>Otu9924

CCTACGGGACGCAGCAGTCGAGGATCTTCGGCAATGGGCGCAAGCCTGACCGAGCGACGC  
CGCGTGCGGGATGAAGGCCTTCGGGTTGTAAACCGCCGTCGAGGGGAGGAAATGCCATG  
GGGTTCTCCCTGTGGTTTGACCTATCCTCAGAGGAAGGACGGGCTAAGTTCGTGCCAGCA  
GCCGCGGTAAGACGAACCGTCCAAACGTTATTTCGGAATCACTGGGCTTAAAGGGTGCGTA  
GGCGGCCCCGAAAGTTGGGTGTGAAATCCCTCGGCTTAACCGAGGAATTGCGCCCCAAAC  
TACCGGGCTCGAGGGAGATAGAGGTGAGCGGAACCTAGGGTGGAGCGGTGAAATGCGTTG  
ATATCCTAAGGAACACCAGGAGCGAAAGCGGCTCACTGGGTCTCTTCTGACGCTGAGGCA  
CGAAAGCTAGGGGAGCGAACGGGATTAGATACCCAGTAGTCC

>Otu9938

CCAGCCTATGGGTGCGCTGCAGTGGGGAATTTTGCGCAATGGGGGAAACCTGACGCAGCA  
ACGCCGCGTGAGTGATGAAGGCCTTCGGGTCGTAAAGCTCTGTCAGAGGGAAAGAAGTGT  
AGGAGGGTTAATACCCCTTTTACTTGACGGTACCCCTCAAAGGAAGCACCGGCTAACTCCG  
TGCCAGCAGCCGCGGTAATACGGAGGGTGCAGCGTTGTTTCGGAATTTATTGGGCGTAAAG  
CGCGTGTAGGCGGTTTTTTTAACTCTGATGTGAAATCTCCCGGCTCAACTGGGAGGGTGC  
CCGAATACTGAAGGGCTAGAGTGCGGGAGAGGAGAGTGGAATTCCTGGTGTAGCGGTGAA  
ATGCGTAGATATCAGGAGGAACACCGGTGGTGTAGACGGCTCTCTGGACCGTAACTGACG  
CTGAGACACGAAAGCGTGGGTAGCAAACAGGATTAGATACCCGCGTAGTCC

>Otu9939

CCAGCCTACGGGTGCGCACCAGTGGGGAATATTGGACAATGGGCGCAAGCCTGATCCAGCA  
ATGCCGCGTGTTGAAGAAGGCCTGCGGGTTGTAAAGCACTTTGAGCGGGAAAGAAGGCG  
CGGGGCTTAACACGTTCCGCGATTGACGTTACCCGCGAGAACAAGCACCGGCTAACTCCGT  
GCCAACAGCCGCGGTAATACGGAGGGTGCAGCGTTAATCGGAATTACTGGGCGTAAAGC  
GTGCGTAGGCGGCCCGCCAGTCCGACGTGAAAGCCCCGGGCTCAACCTGGGAACTGCGT  
CGGATACTGCCGGGCTGGAGTGCGGGAGAGGGCGGTGGAATTTCCGGTGTAGCAGTGAAA  
TGCGTAGAGATCGGAAGGAACACCAGTGGCGAAGGCGGCCGCTGGACCGACACTGACGC  
TGAGGCACGAAAGCGTGGGGAGCAAACAGGATTAGATACCCAGTAGTCC

>Otu9943

CCAGCCTACGGGATGCTCCAGTGGGGAATTTTGCGCAATGGGGGAAACCTGACGCAGCA  
ACGCCGCGTGAGGATGAAGTACTTCGGTACGTAAACTCCTTTTCGATCGGGACGATAATG  
ACGGTACCGGAAGAAGAAGCCCCGGCTAACTTCGTGCCAGCAGCCGCGGTAATACGAGGG  
GGGCGAGCGTTGTTTCGGAATTATTGGGCGTAAAGGGTGCCTAGGCGGTTTGGTAAGTCTT  
ATGTGAAATCTCCGGGCCTAACCCGGAACCTGCGTTGGATACTATCCGGCTAGAGGAATG  
GAGGGGAGACTGGAATACTTGGTGTAGCAGTGAGATGCGTAGATATCAAGTGGAACACCA  
GTGGCGAAGGCGAGTCTCTGGACATTTCTGACGCTGAGGCACGAAAGCCAGGGGAGCAA  
ACGGGATTAGAACCCGAGTAGTCC

>Otu9944

CCAGCCTATGGGGTGCTGCAGTCGAGAATTTTTCACAATGGGGGAAACCTGATGGAGCG  
ACGCCGCGTGGGGGATGAATGGCTTCGGCTCGTAAACCCCTGTCATTTCGGGATCAATGCC  
TGCTATTTTAAAGATGGTAGGTTGATAGTACCGAAAGAGGAAGGGACGGCTAACTCTGTG  
CCAGCAGCCGCGGTAATACAGAGGTCCCAAGCGTTGTTTCGGAATCACTGGGCGTAAAGGG  
TGCGTAGGCGGTTGGGTAAGTCTGACGTGAAATCTCCGGGCCTAACCCGGAACCTGCGTT  
GGAACTATCTGACTAGAGGAATGGAGGGGAGACTGGAATACTTGGTGTAGCAGTGAAAT  
GCGTAGATATCAAGTGGAACACCAGTGGCGAAGGCGAGTCTCTGGACATTTCTGACGCT  
GAGGCACGAAAGCCAGGGGAGCAAACGGGATTAGAGACCCAGTAGTCC

>Otu9947

CCAGCCTATGGGTTGCAGCAGTGAGGAATATTGGGCAATGCCCCGAAGGGTGACCCAGCA  
ACGCCGCGTGAAGGATGAAAGCCGTAAGGTTGTAAACTTCTGTTAGAGGGGACGAATAGC  
TTCGATCAAATCGAAGTTTGACGGTACCCGCAGAATAAGCCCCGGCTAACTTCGTGCCAG  
CAGCCGCGGTAATACGAAGGGGGCTAGCGTTGTTTCGGAATCACTGGGCGTAAAGCGTACG  
CAGGCGGATTGATAAGTCAGGGGTGAAATCCCGGGGCTCAACCTCGGAATTGCCTTTGAT  
ACTGTCTATCTTCGAGTTTCGGGAGAGGTTGGCGGAATTCCTAGTGTAGAGGTGAAATTCG  
TAGATATTAGGAAGAACCAGTGGCGAAGGCGGCCAACTGGCCCCGATACTGACGCTCAT  
GTGCGAAAGCGTGGGGAGCAAACAGGATTAGAGACCCTCGTAGTCC

>Otu9953

CCAGCCTATGGGGCGCAGCAGTCGAGGATCTTCGGCAATGGGCGCAAGCCTGACCGAGCG  
ACGCCGCGTGGGCGATGAAGGCCTTCGGGTTGTAAAGCCCTGTCGGGGAGGAGAAAAGGG  
TAAAACCTTGATCTATTCCCGGAGGAAGCACGGGCTAAGTTCGTGCCAGCAGCCGCGGTA  
AGACGAACCGTGCGAACGTTGTTTCGGAATCACTGGGCTTAAAGGGCGCGTAGGCGGGCCT  
CCAAGTCCGGGGTGAAATCCTCCAGCCTAACTGGAGAAGAGCCTCGGAGACTGGGGGCCT  
CGAGAAGGGTAGGGGCAAGCGGAACCTATGGGTGGAGCGGTGAAATGCATTGATATCCATA  
GGAACCTCCGGTGGCGAAGGCGGCTTGCTGGACCCTTTCTGACGCTGAGGCGCGAAAGCCA  
GGGGAGCAAACGGGATTAGAAACCCTCGTAGTCC

>Otu9956

CCAGCCTATGGGGGGCACCCAGTGGGGAATCTTGCGCAATGGGCGAAAGCCTGACGCAGCC  
ACGCCGCGTGAGTGAAGAAGGCCTTCGGGTTGTAAAGCTCTGTTCGGAGGGGACGAAAACCT  
TCTATGGTTAATAGCCATAGGAATTGACGGTACCCTCAAAGGAAGCACCGGCTAACTTCG  
TGCCAGCAGCCGCGGTAATACGAGGGGTGCAAGCGTTGCTCGGAATTATTGGGCGTAAAG  
CGCGTGTAGGCGGTTTTTTAAGTCTGATGTGAAAGCCCTGGGCTCAACCCGGGAAGTGCA  
TTGGAAACTGGGAGACTTGAATACGGGAGAGGGTAGTGGAATTCCTGGTGTAGGAGTGAA  
ATCCGTAGATATCAGGAGGAACACCGGTGGCGAAGGCGGCTACCTGGACCGATATTGACG  
CTGAGACGCGAAAGCGTGGGGAGCAAACAGGATTAGAGACCCGAGTAGTCC

>Otu9960

CCAGCCTATGGGGGGCACCCAGTGGGGAATCTTGCGCAATGGACGAAAGTCTGACGCAGCC  
ACGCCGCGTGAGTGAAGAAGGCCTTCGGGTTGTAAAGCTCTGTTCGGGAGGGACGAACATC  
CATTGGGTTAACAGCCCAGTGGACTGACGGTACCTTCAAAGGAAGCACCGGCTAACTCTG  
TGCCAGCAGCCGCGGTAATACGAGGGGTGCAAGCGTTGCTCGGAATCATTGGGCGTAAAG  
GGTAGGTAGGTGGTCTCATTTGTCTGGGGTGAAAGCCAGGGCTTAACCTGGAAGTGCC  
CCGGAACCGGTGAGACTGGAGTCTTGAGAGGGTTCGTGGAATTCCTGGTGTAGCGGTGAA  
ATGCGTAGAGATCGGGAGGAACACCAGAGGCGAAGGCGGCGACCTGGACAAGTACTGACA  
CTCAACTACGAAAGTGTGGGGAGCAAACAGGATTAGATACCCAGTAGTCC

>Otu9962

CCAGCCTACGGGAGGCAGCAGCAACGAATATTGGGCAATGGGCGAAAGCCTGACCCAGCG  
ACGCCGCGTGCGGGATGAAGCCCTTCGGGGTGTAACCGCTGTCAGGGTTAGAGAATCTG  
TCGGTGTGAATAATGCCGGCAGTTGACTCATCCAGAGGAAGCCACGGCTAACTCCGTGC  
CAGCAGCCGCGGTAAGACGGAGGTGGCGAGCGTTACTCGGATTCACTGGGCTTAGAGCGG  
GTGCAGGCGGTCCCGCAAGTCCGGAGTGAAATCCCTCGGCTCAACCGAGGAATTGCTTCG  
GATACTGCGGGACTTGAGGCAGGTAGGGGCAAGTGGAACGTTTGGTGTAGCGGTGAAATG  
CGTAGATATCAAACGGAACCGCGGTGGTGAAGACGGCTTGCTGGACCTGTCCTGACGCTC  
AGACCCGAAAGCGTGGGGAGTGAACCGGATTAGATACCCGAGTAGTCC

>Otu9966

CCAGCCTACGGGATGCTGCAGTCGAGGATCTTCGGCAATGGGCGCAAGCCTGACCGAGCG  
ACGCCGCGTGTCGATGAATGGCTTCGGCCGTAACCCCTGTCATTTGCGAACAAATTG  
CTTCAACCAACACGTGAAGCATTGATAGTAGCGGAAGAGGAAGGGACGGCTAACTCTGTG  
CCAGCAGCCGCGGTAATACAGAGGTCCCAAGCGTTGTTTCGGAATCACCGGGCGTAAAGGG  
TGCGTAGGCGGTTGGGTAAGTCTGACGTGAAATCTCCGGGCCTAACCCGGAACCTGCGTT  
GGATACTATCCGGCTAGAGGAATGGAGGGGAGACTGGAATACTTGGTGTAGCAGTGAAAT  
GCGTAGATATCAAGTGGAACACCAGTGGCGAAGGCGAGTCTCTGGACATTTCTGACGCT  
GAGGCACGAAAGCCAGGGGAGCAAACGGGATTAGAAACCCGAGTAGTCC

>Otu9967

CCAGCCTACGGGTCGCAGCAGTCGAGAATCTTCCGCAATGGGCGAAAGCCTGACGGAGCG  
ACGCCGCGTGGTTGATGAAGTACTTCGGTACGTAAAAACCTTTTATGAGCGACTAAGTTT  
ATTGAAGAGCTCATGAATAAGAGGTTGCTAAACTCGTGCCAGCAGCAGCGGTAATACGAG

TGCCTCAAGCGTTATCCGGAATTATTGGGCGTAAAGGGTGTGTAGGCGGCTGTGTTAGTC  
TCGCGTTAAATTCTTCGGCTCAACCGGGGACCTGCGCGGGAAACGGCACAGCTAGAAGAT  
GCGAGGGGTCTCTGGAACCTCATGGTGTAGCGGTGAAATGCGTTGATATCATGGGGAACAC  
CAAAAGCGAAGGCAGGAGACTGGAGCATTCTTGACGCTGAAACACGAAAGCGTGGGGAGC  
AAACAGGATTAGATACCCTAGTAGTCC

>Otu9968

CCAGCCTATGGGAGGCACCAGTAGGGAATATTGGACAATGGACGCAAGTCTGATCCAGCC  
ATCCCGCGTGAAGGATTAAGGCCCTCTGGGTTGTAACTTCTTTTCTCTGGGAATAAAAA  
GCGGTATTCTTATCGCCTTGAAGGTACCAGAGGAATAAGCACCGGCTAACTCCGTGCCAG  
CAGCCGCGGTAATACGGAGGGTGCAAGCGTTATCCGGATTCAGTGGGTTTAAAGGGTGCG  
TAGGTGGTCTGTTAAGTCAGCGGTGAAAGCCTGGAGCTCAACTCCAGAATTGCCATTGAT  
ACTGACGGACTTGAATCAAGTTGAGGTGGATGGAATATTACATGTAGCGGTGAATGCTTA  
GATATTACACAGAACCCGATTGCGAAGGCAGCTTACTGGGCCATTACTGACGCTGATGC  
ACGAAAGCGTGGGGAGCGAACAGGATTAGATACCCGTGTAGTCC

>Otu9972

CCAGCCTATGGGAGGCTCCAGTGGGGAATCTTGACAATGGGCGAAAGCCTGATGCAGCG  
ACGCCGCGTGAAGGATGAAGGCCTTCGGGTTGTAACTTCTTTTGCAGGGGAAGATAATG  
ACGGTACCCTGCGAATAAGCCACGGCTAACTCTGTGCCAGCAGCCGCGGTAAGACAGAGG  
TGCGGAGCGTTGTTTCGGAATTACTGGGCTTAAAGGGCGCGTAGGCGGTGATACAAGTCTG  
GGGTGGAAGCCCATAGCTTAACTATGGGACTGCCCTGGAACTGTATTGCTTGAGTCGGA  
CAGGGGAAGGCGGAATTCCAGGTGTAACGGTGAAATGCGTAGATATCTGGAGGAAGGCCT  
GTGGTGAAGACGGCCTTCTGGGTCTTGACTGACGCTCATACGCGAAAGCTAGGGTAGCAA  
ACCGGATTAGATACCCGCGTAGTCC

>Otu9973

CCAGCCTACGGGACGCAGCAGTGAGGAATATTGGTCAATGGGGGCAACCCTGAACCAGCC  
ATGCCGCGTGAAGGAAGACGGTCCTAAGGATTGTAACTTCTTTTGTACGGGGGTAACTT  
CGGGTACGTGTACCCGACTGAAAGTACTGTACGAATAAGCAACGGCTAACTCCGTGTGAG  
CAGCCGCGGTAATACGGAGGTTGCAAGCGTTATCCGGATTTATTGGGTTTAAAGGGTGCG  
TAGGCGGGTATATAAGTCAGCGGTGAAAGACTGTGCTTAAACGATAGCATTGCCATTGAT  
ACTGTATGTCTTGAGTACATTTGAGGTGGGCGGAATGAGTAGTGTAGCGGTGAAATGCTT  
AGATATTACTCAGAACACCAATTGCGAAGGCAGCTCACTAACTGTCACTGACGCTGAGG  
CACGAAAGCGTGGGGATCAAACAGGATTAGAAACCCCGAGTAGTCC

>Otu10002

GGACTIONTGGGGTCTCTAATCCTGTTTGCTCCCCACGCTTTCGCGCCTCAGCGTCAGTCC  
TCTGATAGAAGCTCGCCTTCGCCACCGGTGTTCTTCCAGATATCTACAGATTTACCCCT  
ACACCTGGAATTCCAGCTCCCCCTCAAGAACTCAAGCCCACCAGTTTCCAGCGCATATGC  
AGGGTTAAGCCCTGCGATTTACACCAGACTTGATGAGCCGCCTACACGCCCTTTACGCC  
CAATAAATCCGAACAACGCTTGCCCCATACGTATTACCGCGGCTGCTGGCACGTAATTAG  
CCGGGGCTTATTCGTGCGCTAACGTCATCAGGTGGGCTTTCCTACTCCCACCCTTATTCTT  
CACCAACAAAAGGATTTTACAACCTTACGGCCTTCATCATCCACGCGGCGTCGCTCCGTC  
AGGGTTTCCCCCATTTGCGGAAGATTCTTAGCTGCAGCGACCCATAGGCTGG

>Otu10012

CCAGCCTATGGGAGGCTCCAGGCGGAAACTTTACAGTGCCGGCAACGGCGATAAGGGG  
ACCTCGAGTGCCAGGATACAATCCTGGCTGTCGTAATGCCATAAAAGCACTATATAGCAA  
GGGCCGGGCAAGACCGGTGCCAGCCGCCGCGGTAACACCGGCGGCTCGAGTGGTAACCGC  
TATTATTGGGTCTAAAGGGTCTGTAGCCGGCCTGGTAAGTCTTTTGGGAAATCCGGCAGC  
TCAACTGTCGGGCTTTTACAGAGGATACTGCTAGGCTCGAGACCGGGAGAGGTGAGAGGTAC  
TTCATGGGTAGGGGTGAAATCTTGTAATCCTTGAAGGACCACAGTGGCGAAGGCGTCTC  
ACCAGAACGGATCTGACGGCAAGGGACGAAAGCTAGGGGCACGAACCGGATTAGAAACCC  
GAGTAGTCC

>Otu10022

CCAGCCTATGGGTGCGCAGCAGTGGGGAATATTGGACAATGGGGGAAACCCTGATCCAGCC  
ATGCCGCGTGAGTGAAGAAGGCCTTAGGGTTGTAAAGCTCTTTTGGCGGGGACGATAATG  
ACGGTACCCGCGAGAATAAGCCCCGGCTAACTTCGTGCCAGCAGCCGCGGTAATACGAAGG  
GGGCTAGCGTTGTTTCGGAATCACTGGGCGTAAAGCGTACGCAGGCGGATTGATAAGTCTG  
ATGTGAAAGCCCTGGGCTCAACCCGGGAAGTGCATTGGAAACTGGGAGACTTGAATACGG  
GAGAGGGTAGTGGAATTCCTGGTGTAGGAGTGAAATCCGTAGATATCAGGAGGAACACCG  
GTGCGAAGGCGGCTACCTGGACCGATATTGACGCTGAGACGCGAAAGCGTGGGGAGCAA

ACAGGATTAGAGACCCCCGTAGTCC

>Otu10041

CCAGCCTATGGGTCGCAGCAGTAGGGAATATTGGTCAATGGGCGCAAGCCTGAACCAGCC  
ATGCCGCGTGCAGGAAGAAGGCGTTACGCGTTGTAACTGCTTTTGAACGGGAATAAAAA  
GGCCATGCGTGGCAAATTGAATGTACCGTTAGAATAAGCCACGGCTAACTACGTGCCAGC  
AGCCGCGTAATACGTAGGTGGCAAGCGTTATCCGGATTTATTGGGTTTAAAGGGGGCGT  
AGGCGGTCTGTAAAGTCAGTGGTGAAAGACTCCGGCTCAACCGGAGCATTGCCATTGATA  
CTGCAGGGCTAGAGTACGGTAGAGGTGGGCGGAATTTACGGTGTAGCGGTGAAATGCATA  
GATACCGTAAAGAACACCGATTGCGAAGGCAGCTCACTGGACCGTAACTGACGCTGAGGC  
CCGAAAGTGCGGGTATCAAACAGGATTAGAAACCCCCGTAGTCC

>Otu10045

CCAGCCTATGGGGGGCTGCAGTGGGGAATTTTGCGCAATGGGGGAAACCCTGACGCAGCA  
ACGCCGCGTGGAGGAAGAAGTATTTTCGGTACGTAACTCCTTTTCGATCGGGACGATAATG  
ACGGTACCGAGAGAAGAAGCCCCGGCTAACTTCGTGCCAGCAGCCGCGGTAATACGAGGG  
GGGCAAGCGTTATCCGGATTCATTGGGTTTAAAGGGTGCGTAGGCGGACTTATAAGTCAG  
TGGTGAAATCTCATCGCTTAACGATGAACGTGCCATTGATACTGTAGGTCTTGAGTACAG  
ATGCCGTTGGCGGAATGTGTCATGTAGCGGTGAAATGCATAGATATGACACAGAACACCG  
ATTGCGAAGGCAGCTGACGAACTGTAACCTGACGCTGAGGCACGAAAGCGTGGGGATCAA  
ACAGGATTAGATACCCTTGTAGTCC

>Otu10051

CCAGCCTATGGGAGGCACCAGTAAGGAATATTGGACAATGGTGGCAACACTGATCCAGCC  
ATGCCGCGTGCAGGATGAAGGCGCTATGCGTTGTAACTGCTTTTCCAGGGGAAGAAAAC  
CCCCGACGTGTCGGGGCTTGCCGGTACCCTGGGAATAAGCATCGGCTAACTCCGTGCCAG  
CAGCCGCGGTAATACGGAGGATGCGAGCGTTATCCGGATTTATTGGGTTTAAAGGGTGCG  
TAGGCGGATAAAATAAGTCAGTGGTGAAAACCTGCAGCTTAACTGTAGAATTGCCATTGAT  
ACTGTTAGTCTTGAGTACGGTCAAGGTAGGCGGAATGTGTAATGTAGCGGTGAAATGCTT  
AGATATTACACAGAACACCGATTGCGAAGGCAGCTTACTGGGCCATTACTGACGCTGATG  
CACGAAAGCGTGGGGAGCGAACAGGATTAGAAACCCCTGTAGTCC

>Otu10052

CCAGCCTACGGGTGTCAGCAGTGGGGAATATTGGACAATGGGCGAAAGCCTGATCCAGCC  
ATGCCGCGTGAGTGATGAAGGCCTTCGGGTGTAAACTCCTTTTCTGAGGGAAGAACAAC  
CGGGCGAGGAAATGCGCCCGGCCTGACGGTACCTCAGGAATAAGCAACGGCTAACTCCGT  
GCCAGCAGCCGCGTAATACGGAGGTTGCGAGCGTTGTTTCGGAATAACTGGGCGTAAAGG  
GAGCGCAGGCGGTTTGGTAAGTCTGAAGTGAAAGCCCGGGGCTTAACCCCGGAAGTGCTT  
TGGAACCTGTCAAACCTAGAGTAAGTGAGAGGAGAGCGGAATTCAGGGTGTAGCGGTGAAA  
TGCGTAGATATCCTGAGGAACACCGGTGGCGAAAGCGGCTCTCTGGTACGAACTGACGC  
TGAGGCTCGAAAGCGTGGGGATCAAACGGGATTAGATAACCCAGTAGTCC

>Otu10054

CCAGCCTACGGGTGGCAGCAGTGAGGAATATTGGTCAATGGGCGCAAGTCTGACCCAGCC  
ATGCCGCGTGAAGGAAGAAGGCCCTAGTGGTCGTAAACTCCTTTTATATGGGAAAAATTC  
TCGGATCGTGAATCCGGGTTGATGGTACTATATGAATAAGCATCGGCTAACTCCGTGCCA  
GCAGCCGCGGTAATACGGAGGATGCAAGCGTTATCCGGATTTATTGGGTTTAAAGGGTGC  
GTAGGCGGGACGATAAGTCAGTGGTGAAATCCTACGGCTTAACTGTAGAATTGCCATTGA  
TACTGTCGTTCTTGAGTGCAGCTGAAGAGGGCGGAATGTGTTGTGTAGCGGTGAAATGCT  
TAGATATAACACAGAACACCGATTGCGAAGGCAGCTCTCTAACTGCAACTGACGCTGAG  
GCACGAAAGCGTGGGGATCAAACAGGATTAGAAACCCAGTAGTCC

>Otu10055

CCAGCCTATGGGTGGCTGCAGTCGAGAATCTCCGGCAATGGGCGCAAGCCTGACCGAGCG  
ACGCCGCGTGGAGGATGAAGGCCTTCGGGTGTAAACTCCTGTGAGGGGGAGCAAGGTG  
CCGTGAAGAACGGTGCTCGAGCGATCCCTGGAGGAAGCACGGGCTAAGTTCGTGCCAGCA  
GCCGCGGTAAGACGAACCGTGCGAACGTTATTCGGAATCACTGGGCTTAAAGCGCGTGCA  
GGCGGTCCGGCACGTCCGTGCTGAAATCCCCGGCTCAACCGGGGAACCGGCGCGGATA  
CGACCGGGCTGGAGGAGGGTAGGGGGATCGGGAACCTCCGGTGGAGCGGTGAAATGCGTT  
GAGATCGGAAGGAACGCCCGTGGCGAAAGCGCGGTCTCTGGACCCTTCTGACGCTGAGAC  
GCGAAAGCCAGGGGAGCGAACGGGATTAGAGACCCGCGTAGTCC

>Otu10058

CTAGCCTATGGGTCGCAGCAGTCGAGAATTTTTCACAATGGGGGAAACCCTGATGGAGCG  
ACGCCGCGTGGGGGATGAATGGCTTCGGCCGTAACCCCTGTCATTTGTGAACAAACCT



TTTCACTGAACAAGTGGAAAAGTTGATAGTAACGGAAGAGGAAGGGACGGCTAACTCTGTG  
CCAGCAGCCGCGGTAATACAGAGGTCCCAAGCGTTGTTTCGGATTCACTGGGCGTAAAGGG  
TGCGTAGGTGGCGGGGTAAGTCGGATGTGAAATCTCCGAGCTCAACTCGGAAATGGCATG  
GGAAACTGCTCTGCTCGAGGGTTGGAGGGGGGACTGGAATACTTGGTGTAGCAGTGAAAT  
GCGTAGATATCAAGTGGAACACCAGTGGCGAAGGCGAGTCCCTGGACAACCTCTGACACT  
GAGGCACGAAAGCTAGGGGAGCAAACAGGATTAGAAACCCGCGTAGTCC

>Otu10070

CCAGCCTATGGGTGGCTGCAGTGGGGAATATTGGGCAATAGGCGCAAGCCTGACCCAGCA  
ATGCCGCGTGTGTGAAGAAGGCCTGCGGGTTGTAAAGCACTTTGGGCGGGGAAGAAGCGC  
GCGCCGCGAACACCGGCGCGCGTTGGCGCTACCCGCGGAACAAGCACCGGCTAACTCCGT  
GCCAGCAGCCGCGTAATACGGAGGGTGCAGCGTTAATCGGAATTACTGGGCGTAAAGC  
GTGCGTAGGCGGCCCGGTCACTCTCGCGTGAAAGCCCCGGGCTCAACCTGGGAACTGCGC  
GGGAAACTGCCGGGCTGGAGTGCGGGAGAGGGCGGTGGAATTTCCGGTGTAGCAGTGAAA  
TGCGTAGAGATCGGAAGGAACACCAGTGGCGAAGGCGGCCCGCTGGACCGGCACTGACGC  
TGAGGCACGAAAGCGTGGGGAGCAAACAGGATTAGATAACCCGCGTAGTCC

>Otu10075

CCAGCCTATGGGGCGCAGCAGTGGGGAATTTTTCGCAATGGGGGAAACCCTGACGCAGCA  
ACGCCGCGTGGAGGATGAAGTCCCTTGGGACGTAAACTCCTTTTCGACCGGGACGATAATG  
ACGGTACCGGTGGAAGAAGCCCCGGCTAACTCCGTGCCAGCAGCCGCGTAATACGGGGG  
GGGCAAGCGTTGTTTCGGAATTATTGGGCGTAAAGGGCGCGTAGGCGGTGCGGTAAGTCAT  
TTGTGAAAGCTCCCGGCTCAACTGGGAGACTGCAGGCGAAACTGCCGTGCTGGAGGGTGG  
GAGAGGTGAGTGGAATTCCTGGTGTAGCGGTGGAATGCGTAGATATCTGGAAGAACACCA  
GCTGCGAAGGCGGTCTCCTGGCCAAATACTGACGCTGATGCTCGAAAGCTAGGGGAGCAA  
ACAGGATTAGATAACCCAGTAGTCC

>Otu10079

CCAGCCTACGGGTGGCAGCAGTGGGGAATTTTTCGCAATGGGGGAAACCCTGACGCAGCAA  
CGCCGCGTGAGTGATGAAGGCCTTCGGGTTCGTAAAGCTCTGTCAGAGGGAAAGAAGTGTA  
GGAGGGTTAATACCCCTTTTACTTGACGGTACCCTCAAAGGAAGCACCGGCTAACTCCGT  
GCCAGCAGCCGCGTAATACGGAGGGTGCAGCGTTGTTTCGGATTTATTGGGCGTAAAGC  
GCGTGTAGGCGGTTTTTTAAGTCTGATGTGAAAGCCCTGGGCTCAACCCGGGAAGTGCAT  
TGGAAGCTGAGAGACTTGAATACGGGAGAGGGTAGTGGAATTCCTGGTGTAGTGGTGAAA  
TGCGTAGATATCCAGAGGAACACCAGTGGCGAAGGCGGCCTCCTGGACCATTTCTGACGC  
TCATACGCGAAAGCTAGGGTAGCAAACGGGATTAGAAACCCAGTAGTCC

>Otu10080

CCAGCCTACGGGTGCAGCAGTCGAGAATTTTTCACAATGGGGGAAACCCTGATGGAGCG  
ACGCCGCGTGGGGGATGAATGGCTTCGGCCCGTAAACCCCTGTCATTTGTGAACAAACCT  
TACCGCTGAACAAGCGGGAAGCTGATTGTAAACGGAAGAGGAAGGGACGACTAACTCTGTG  
CCAGCAGCCGCGTAATACAGAGGTCCCAAGCGTTGTTTCGGATTCACTGGGCGTAAAGGG  
TGCGTAGGTGGCCGGGTAAGTCTGATGTGAAATCTCCGGGCCTAACCCGGAAACTGCGTT  
GGATACTATCCGGCTAGAGGAATGGAGGGGAGACTGGAATACTTGGTGTAGCAGTGAAAT  
GCGTAGATATCAAGTGGAACACCAGTGGCGAAGGCGAGTCTCTGGACATTTCTGACGCT  
GAGGCACGAAAGCCAGGGGAGCAAACGGGATTAGAAACCCCTGTAGTCC

>Otu10088

CCAGCCTATGGGTGCGCTGCAGTGAGGAATATTGGTCAATGGGTGCAAACCTGAACCAGCC  
ATGCCGCGTGAAGGATGAAGGCTCTACGAGTCGTAAACTTCTTTTATACGGGAATAAACCC  
TCTCTACGTGTAGAGAGTTGAAGGTACTGTAAGAATAAGCATCGGCTAACTCCGTGCCAG  
CAGCCGCGGTAATACGGAGGATGCAAGCGTTATCCGGATTATTAGGTTTAAAGGGTGTG  
TAGGCGGACTGGTAAGTCAGCGGTGAAATCTCTCAGCTTAAGTGAAGAACTGCCATTGAT  
ACTGTCAGTCTTGAATGCAGATGAGGTAAGCGGAATATGTAATGTAGCGGTGAAATGCTT  
AGATATTACATAGAACACCAATTGCGAAGGCAGCTTACTAAATTGTGATTGACGCTGAGA  
CACGAAAGCGTGGGGAGCGAACAGGATTAGAGACCCCGGTAGTCC

>Otu10092

CCAGCCTACGGGGCGCTGCAGTGGGGAATTTTTCGCAATGGACGAAAGTCTGACGCAGCG  
ACGCCGCGTGGGTGATGAAGGCCTTCGGGTGTAAAGCCCTGTGGGGCGGGAAGAATAAG  
TGGTGACTAATACTTGCCATGATGACGGTACCGCCTTAGCAAGCACCGGCTAACTCTGTG  
CCAGCAGCCGCGGTAAGACAGAGGGTGCAAACGTTGTTTCGGAATTACTGGGCGTAAAGCG  
CGTGTAGGCGGCTTAGCAAGTCCGCTGTGAAAGCCCTTGGCTCAACCAAGGAAGTGCAT  
CGAAACTGCTAAGCTTGAGTCTCGGAGAGGATGGTGAATTCCTCGGTGTAGAGGTGAAAT

TCGTAGATATCGAGAGGAACACCAGTGGCGAAGGCGGCCATCTGGACGATGACTGACGCT  
GAGACGCGAAAGCATGGGGAGCAAACAGGATTAGAGACCCCAGTAGTCC  
>Otu10103  
CCAGCCTATGGGAGGCAGCAGCCGAGGATTTTTCTCAATGGGCGAAAGCCTGAAGGAGCG  
ACGCCGCGTGGGGGATGAAGGTCTTCGGATTGTAAACCCCTGTCATCTGGGAACAATGGT  
TACGACCCAATACGTCGTGACTTGATAGTACCGGAAGAGGAAGCCGTGGCTAACTCTGTG  
CCAGCAGCCGCGGTAATACAGAGACGGCAAGCGTTGTTTCGGATTCAATTGGGCGTAAAGGG  
TCCGTAGGCGGTCTGGGCAAGTCGGATGTGAAATCCCGCAGCCTAACTGCGGTGGGTCAAT  
CGATACTGCTCGGCTCGAGGGCTGGAGAGGAGACTGGAATTGTCGGTGTAGCGGTGAAAT  
GCGTAGAGATCGACAAGAACACCGGTGGCGAAGGCGGGTCTCTGGACAGTTCCTGACGCT  
GAGGGACGAAAGCTAGGGGAGCAAACGGGATTAGATACCCGGGTAGTCC  
>Otu10112  
CCAGCCTACGGGAGGCAGCAGTCGAGAATTTTTCTCAATGGGGGAAACCCTGAAGGAGCG  
ACGCCGCGTGAAGGATGAAGGTCTTCGGATTGTAACTTCTGTCATTAGGGAACAAATCT  
TCCGCGTAACTGCCGGAAGTCTGATAGTACCTGAAGAGGAAGAGACGGCTAACTCTGTGC  
CAGCAGCCGCGGTAATACAGAGGTCTCAACCGTTGTTTCGGATTCAATTGGGCGTAAAGGGT  
GCGTAGGCTGCGGAGTAAGTCTGGTGTGAAATCTCGGGGCTCAACCCCGAACTGCACTG  
GATACTGCTTCGCTCGAGTATTGGAGAGGAGATTGGAATTTACGGTGTAGCAGTGAAATG  
CGTAGATATCGTAAGGAAGACCAGTGGCGAAGGCGAATCTCTGGACAATTACTGACGCTG  
AGGCACGAAGGCCAGGGGAGCAAACGGGATTAGATACCCCTCGTAGTCC  
>Otu10122  
CCAGCCTACGGGAGGCACCAGGGTTTTTCAGTCAACGATCCTAGCGCCGCTCCCAGTCGCG  
ACTCAAGCATCCCTCGCACAACTTCGGTTCGGACCAGAATCTCAGCATCGACGTGTGCAT  
TCTCCTCCGGCAGCCCCCGCTAGCCCCCTAGTCCCTCTTCCATACTCCCTACTCCCTGCT  
CCTCCACCACTGCCGCAATCGCCATTGGCTGCGCGAAGAGCGAACTCGATCCGGATTGCT  
CGTTCTGAATCCGCATTCCCGAGCTCGAAAACCCAGCCGGCCCCCGCAAGCGTCCATTTT  
CAAAGAGGAAGACCGCCACCTCATCTACATTGCGCCGACGCCTGCAAAATGACGGCTCTCA  
ACTGGCTCAGCGGGCGCACCCAGCTCGCTTGCCAACGCGCGCACGGCCTCAACGCGCTGCA  
CCTGCGCATGGAGCGCAGCGGCGGATTTCGAATTAGATACCCCAGTAGTCC  
>Otu10126  
CAGCCTATGGGTTGCAGCAGTCGAGAATCTTCCGCAATGGACGAAAGTCTGACGGAGCGA  
CGCCGCGTGATGGATGAAGACCCTCTGGGTCGTAAACATCTTTTGTGAGGGAGAAAGTTT  
ATTGATAGTACCTCAAGAATAAGGGGTTGCTAAACTCGTGCCAGCAGCAGCGGTAATACG  
AGTCCCCCGAGCGTTATCCGGAATTATTGGGCGTAAAGGGTGTGTAGGTGGTTTTTGTAG  
TCGATCGTTAAAACCCGGAGCTTAACTCCGGATCTGCGTTCGAAACGGCAAGACTAGAGG  
ACGGCAGGGATGAGTGGAACCTCATGGAGTAGGGGTGAAATCCGTTGATATCATGGGGAAC  
ACCGGAAGCGAAGGCAGCTCATTTGGGCCGCTCCTGACACTGAAACACGAAAGCGTGGGTA  
GCGAAAGGGATTAGAAACCCTCGTAGTCC  
>Otu10130  
CCAGCCTATGGGGCGCAGCAGTAGGGAATATTGGACAATGGACTAAAGTCTGATTTCAGTT  
ACAATCATAGATATTTAAATTATGCTTTTATATTTTAAAGTCCTGACTAATTATGTGCCA  
GCAGTCGCGGTAATACATAAAAGGGCGAAGGTTTCATCAAAATGACTGGGTATAAAGCGTTT  
GAAGAGTCTCAATTAACATTTGTAAAAATTTATCAAGACCATTATTAGTTGGTTTTTTACG  
CTTTTATGTTTTTGTGTTTGTGTTTTTTTTTAGGAATAGAGAATTTTATAGGGAGCAATGA  
AATGCTATTATCTCTAAAGGAATTTCAATAGTTAATACACTATTCTAAAATTTAACTGAC  
CTTTAAAACGAAAGTCAAGGGAGTAAATAGGATTAGATACCCCTCGTAGTCC  
>Otu10142  
CCAGCCTATGGGACGCAGCAGCCAAGAACATTCGACAATGGGCGAAAGCCTGATCGAGCG  
ACGCCGCGTGGAGGATGAAGTCCTTCGGGATGTAACTCCTTTTGCCAGGGAGGAAGTCT  
ATTGACGTTACCTGGAGAATAAGAGGTTGCTAAACTCGTGCCAGCAGCAGCGGTAATACG  
AGTGCCTCAAGCGTTATCCGGAATTATTGGGCGTAAAGGGTGTGTAGGTGGTCATGTTAG  
TCTTTCGTTAAAGCTCCTGGCTCAACCGGGAAAATGCGGAGGAAACGGCATGACTATGAG  
GGTGTGAGAGGTTTGCAGAACTCATGGTGTAGGGGTAAAATCCGTTGATATCATGGGGAA  
CACCAAAGCGAAGGCAGCAAACTGGCGCATTCCTGACACTGAAACACGAAAGCGTGGGG  
AGCAAATGGGATTAGATACCCCGTAGTCC  
>Otu10144  
CCAGCCTATGGGGGGCTGCAGTGGGGAATATTGGACAATGGGCGAAAGCCTGATCCAGCA  
ATGCCGCGTGAGTGATGAAGGCCTTAGGGTTGTAAAGCTCTTTTAGTAGGGAAGATAATG

ACGGTACCTACAGAAAAAGCCCCGGCAAACCTTCGTGCCAGCAGCCGCGGTAATACGAAGG  
GGGCTAGCGTTGTTTCGGAATCACTGGGCGTAAAGCGCGCGCAGGCGGCTTGTCAAGTTGG  
GAGTGAAAGCCCCGAGCTTAACTTCGGAATAGCTTTCAAACCTGACAGGCTAGAGATGGA  
TAGAGGATAGTGGAATTCCTAGTGTAGAGGTGAAATTCTTAGATATTAGGAGGAACACCG  
GAGGCGAAGGCGGCTATCTGGGTCCATACTGACGCTGAGGCGCGAGAGCGTGGGGAGCAA  
ACAGGATTAGATACCCCCGTAGTCC

>Otu10145

CCAGCCTATGGGAGGCAGCAGTGGGGAATATTGGACAATGGGGGAAACCCTGATCCAGCA  
ATGCCGCGTGAGTGATGAAGGCCTTAGGGTTGTAAAGCTCTTTTACCCGGGATGATAATG  
ACAGTACCGGGAGAATAAGCTCCGGCTAACTCCGTGCCAGCAGCCGCGGTAATACGGAGG  
GAGCGAGCGTTGTTTCGGAATTACTGGGCGTAAAGGGCACGTAGGCGGCTTTGTAAGCCCCG  
GCGTGGAAGCCCACGGCTCAACCGTGGGATTGCGTTGGGAACTGCGAGGCTTGAATCATG  
GAGAGGGAGCTAGAATTCCTGGTGTAGGGGTGAAATCTGTAGAGATCAGGAAGAATACCA  
GTGGCGAAGGCGAGCTCCTGGCCAATGATTGACGCTGAGGTGCGAAAGTGTGGGGGGCAA  
ACAGGATTAGAAACCCCTGTAGTCC

>Otu10148

CCAGCCTACGGGAGGCAGCAGTTAGGAATTTTGCACAATGGGGGAAACCCTGATGCAGCA  
ACGCCGCGTGATGATGAAGGCCTTCGGGTCGTAAATCCTTTTCAACGGGAGGATTCGG  
ACGGTACCGTTGGAATAAGCATCGGCTAACTACGTGCCAGCAGCCGCGGTAATACGTAGG  
ATGCGAGCGTTATCCGGATTTACTGGGCGTAAAGAGCGCGTAGGTGGTTCCGTAAGTTGG  
GCGTGAAAGCCCCCGGCTTAACTGGGGAGGGTTCGTTCAATACTGCGGGACTTGAGGGTGG  
ATGAGGAGACTGGAATTCCTGGTGTAGTGGTGAAATGCGTAGATATCGGGAGGAACACCT  
GTGGCGAAGGCGAGTCTCTAGGCCACTCCTGACACTGAGGCGCGAAAGCGTGGGGAGCGA  
ACGGAATTAGAGACCCGGGTAGTCC

>Otu10163

CCAGCCTATGGGTTGCTGCAGGGAATATTGCATAATGGGCGAAAGCCTGATGCAGCAACG  
CCGCGTGTGCGATGAAGGCCTTCGGGTTGTAAAGCACTTTTCGAGGGGACGAGGAAGGAC  
AGTACCCTCGGAATAAGCCTCGGCTAACTACGTGCCAGCAGCCGCGGTAACACGTAGGAG  
ACGAGCGTTATCCGGATTTACTGGGCGTAAAGCGCGTGCAGGCGGTTTGGTAAGTTGGAT  
GTGAAAGCTCCTGGCTTAACTGGGAGAGGTCGTTCAATACTGCCAGACTAGAGGATGGTA  
GAGGGAGGTGGAATTCCTGGGTGTAGTGGTGAAATGCGTAGATACCCAGAGGAACACCAGT  
GGCGAAAGCGGCCTCCTGGACCATTTCTGACGCTCATACGCGAAAGCTAGGGTAGCAAAC  
GGGATTAGAAACCCCTCGTAGTCC

>Otu10171

CCAGCCTACGGGTGGCACCAGTGGAGAATCATCGTTCGATGGGCGAAAGCCTGAGCGTGCG  
ATGCCACAACATGAAGACGGCCTCTGCTGTAAAGTGTCCAGGGGACGATACAGAAGGAGT  
GCGTCCTACGGTAGCCCTGTACAACCTTCGGTGCCAGCATACGCGGTCATACCGAGAGGGC  
GAGACATGCTTGTGAGGATTAGGTGTAGAGCGTCCGTAGACGGCTTGGCTGATGTCATCT  
GTGCATGGCGGGCATAACCTGCCTTGTGGATGAGTGGATTGGCCAGCTTGGATGGTTAAG  
AAGAGCACGGGAGACATCAGGGACCGGTGAAATGGGTTGATCTGATGGGGACTTCGTAGG  
CGGAAGCAGTGCTCTTGTGGCCAGTGACGTTGAGGGACGAGAGCACGGGGAGCAAAGTGG  
ATTAGAACCCTTGAAGTCC

>Otu10173

CCAGCCTATGGGGTGCTGCAGCCGAGAATATTGCACAATGGGCGAAAGCCTGATCGAGCG  
ATACCGCGTGGTGGATGAAGTGCTTCGGCACGTAAACATCTTTTATGGAGGAGGAAGTCA  
TTGACGTTACTCCATGAATAAGGGCTCCTAACTCTGTGCCAGCAGGAGCGGTAATACAG  
AGGCCCCGAGCGTTACCCGGAATTACTGGGCGTAAAGAGTGCGTAGGCGGTTGCGTTAGT  
CGTTCGTTAAATCCCGGGGCTCAACTCCGGACCAGCGAGCGAAACGGCGCGACTTGAGGG  
CGCGAGAGGTACAGGGAACCTCATGGTGTAGGGGTGAAATCCGTTGATATCATGGGGTACA  
CCGAAAGCGAAGGCACTGTACTGGCGCGTTCCTGACGCTGAGGCACGAAAGCGTGGGTAG  
CGAACGGGATTAGAAACCCAGTAGTCC

>Otu10174

CCAGCCTACGGGAGGCAGCAGTGGGGAATTTTGGACAATGGGCGCAAGCCTGATCCAGCC  
ATGCCGCGTGCTGAAGAAGGCCTTCGGGTTGTAAAGGACTTTTGTCTGGGAGCAAAGCC  
TAGAGATGAAGAATTACTAGGGCTGAGAGTACCGGAAGAATAAGCACCCGGCTAACTACGT  
GCCAGCAGCCGCGGTAATACGTAGGGTGCAAGCGTTAATCGGAATGACTGGGCGTAAAGA  
GTGCGTAGGCGGATTCGCGAGCTTGATGTGAAATCCCCGGGCTTAACTGGGAATGGCAT  
GGAGGACAGTGAGTCTAGAGTCTGTCAGAGGTGGGTAGAATTCCTCCGTGTAGCAGTGAAA

TGCGTAGAGATGGGGAGGAATACCGATGGCGAAGGCAGCCCACTGGGATAAGACTGACGC  
TGAGGTACGAAAGCGTGGGGAGCAAACAGGATTAGAAAACCCGCGTAGTCC  
>Otu10178  
CCAGCCTATGGGAGGCACCAGTGAGGAATTTTGGTCAATGGGGGAAACCCTGAACCAGCG  
ACGCCGCGTGCGAGGATGAAGGAGCTTTGCTCTGTAACTGCTGTCGGATGGGAAAAAAG  
CGGGCTCTGTCCGCTGGGATTGTACCATCAAAGGAAGGATCGGCTAACTACGTGCCAGCA  
GCCGCGGTAATACGTAGGATCCAAGCGTTGTCCGGATTTACTGGGTGTAAAGGGTGCGTA  
GGCGGATTTCGTGCGTCAGAGGTTAAATCTCCCGCTTAACCGGGAACCTGCCTTTGATAC  
GGCGAGTCTTGAGTGCAGAGAGAGGACGGTAGAATTCCTGGTGTAGCAGTGAAATGCGTAG  
ATATCAGGAGGAATACCGATGGCGAAGGCGGCCGTCTGGCTCGCAACTGACGCTCAGGCA  
CGAAAGCGTGGGGAGCAAACAGGATTAGAAAACCCTCGTAGTCC  
>Otu10183  
CCAGCCTACGGGATGCTCCAGTAGGGAATATTGGTAATCTGCGAAAGCGGGAACCAGCAA  
CGCCGCGTGTCGATGAAGGCCTTCGGGTCTGTAAAGCACTTTTTGAGGGGACGAGGAAGG  
ACGGTACCCTCAGAATAAGTCTCGGCTAACTACGTGCCAGCAGCCGCGGTAACACGTAGG  
AGACGAGCGTTATCCGGATTTACTGGGCGTAAAGCGCGTGCAGGCGGTTTGTTAAGTTGG  
ATGTGAAAGCTCCCGCTTAACCTGGGAGAGGTCGTTCAATACTGCCAGACTTGAGAGCAG  
TAGAGGAAGATGGAATTCCCGGTGTAGTGGTGAAATGCGTAGATATCGGGAGGAACACCA  
GTGGCGAAGGCGATCTTCTGGACTGTTTCTGACGCTCATATGCGAAAGCTAGGGTAGTAA  
ACAGGATTAGATACCCCTCGTAGTCC  
>Otu10197  
CCAGCCTATGGGTGGCTGCAGTCGAGGATCTTCGGCAATGGGCGCAAGCCTGACCGAGCG  
ACGCCGCGTGCGGGATGAAGGCCTTCGGGTGTAAACCGCCGTCGGAGGGGAGGAAATGC  
CAGGGGGTTCTCCCCCTGGTTTGACCTATCCTCAGAGGAAGTACGGGCTAAGTTTCGTGCC  
AGCAGCCGCGGTAAGACGAACCGTACGAACGTTATTTCGGAATCACTGGGCTTAAAGGGTG  
CGTAGGCGGCCCGGAAAGTTGGGTGTGAAATCCCTCGGCTCAACCGAGGAATTGCGCCCA  
AACTACCGGGCTTGAGGGACACAGAGGTGAGCGGAACTTAGGGTGGAGCGGTGAAATGC  
GTTGATATCCTAAGGAACACCAGGAGCGAAAGCGGCTCACTGGACCATAACTGACGCTGA  
TGCACGAAAGCTAGGGGAGCAAACAGGATTAGATACCCCTGTAGTCC  
>Otu10198  
CCAGCCTATGGGTGTGCTGCAGCCAAGAATCTTCCGCAATGGGGGAAACCCTGACGGAGCG  
ACGCCGCGTGAGGGAAGAAGGTCTTCGGATTGTAAACCTCTTTTCTTGGGGAAGAATAAG  
ACTACCAGGAAATGGGTAGTTGATGACGGTACCCGAGGAATAAGCCCCGGCTAATTACGT  
GCCAGCAGCCGCGGTAATACGTAAGGGGCGAGCGTTGCTCGGAATTACTGGGCGTAAAGG  
GCGTGTAGGCGGCTTGATAAGTCAATGTAAAAGACCGCGGCTTAACCGCGGGAATGCGT  
TCGAAACTGTCAAGCTTGAGTTTGGTGGAGGGTGATGGAATTCCTGGTGTAGCGGTGAAA  
TGCGTAGATATCGGGAAGAACACCGAAGGCGAAAGCAGTCATCTATGCCAAAACCTGACGC  
TGAGGCGCGAAAGTATGGGGATCAAACAGGATTAGAAAACCCTAGTAGTCC  
>Otu10203  
CCAGCCTATGGGTGCGCAGCAGTCGAGGATCTTTGGCAATGGGCGCAAGCCTGACCAAGCG  
ACGCCGCGTGTCGATGAAGGCCTTCGGGTGTAAAGCACTGTCAGGGGGGAACAAATCA  
ATGAGTGATCCCCAGAGGAAGCACGGGCTAAGTTTCGTGCCAGCAGCCGCGGTAAGACGAA  
CCGTGCGAACGTTGTTTCGGAATCACTGGGCTTAAAGGGCGCGTAGGTGGTTTGCCAAAGTC  
GGGTTGAAATCTTTTCGGCTTAACCGGAAAAGTGGCTTCGATACTGGCAAGCTGGAGGGA  
GGTAGGGGCGGATGGAACCTTCGGTGGAGCGGTGAAATGTGTTGATATCGGAAGGAACGC  
CGGTGGCGAAAGCGATCCGCTGGACCTCTTCTGACACTGAGGCGCGAAAGCCAGGGGAGC  
AAACGGGATTAGATACCCCTGTAGTCC  
>Otu10208  
CCAGCCTACGGGAGGCAGCAGTCGAGAATATTCCACAATGGGCGAAAGCCTGATGGAGCG  
ACGCCGCGTGCGAGGATGAAGCCCTTCGGGTGTAAACTGCTTTTATTACAGAAGAAGTTA  
TTGACTGTATGTAGTGAATAAGGGGCTGCAAACTTCGTGCCAGCAGCCGCGGTAATACGA  
AGGCCCCAAGCGTTATCCGGATTTATTGGGCGTAAAGCGTGCGTAGGAGGTTTCGGTAAGT  
TCATTGTTAAATTTTCGTGCTTAACGGCGGAGCCGCAATGAATACTGCCAACTAGAGTG  
TGCGAGAGGCTAATAGAACTCACGGTGTAGGGGTGAAATCCGTTGATATCGTGGGGGAATA  
CCAAAGGCGAAGGCATTTAGCTGGCGCATTACTGACTCTAAGGCACGAAAGCGTGGGGAG  
CAAAGAGGATTAGAGACCCTCGTAGTCC  
>Otu10210  
CCAGCCTACGGGGGGCTGCAGTGGGGAATTTTGCAGCAATGGGGGCAACCCTGAACCAGCC

ATGCCGCGTGAAGGATGACAGCCCTACGGGTTGTAACTTCTTTTGTACGGGAAAAAACCC  
CCTGGTCGTGAACCAGGGCTGATGGTACCGTAAGAATAAGCATCGGCTAACTCCGTGCCA  
GCAGCCGCGGTAGTACGGAGGATGCAAGCGTTATCCGGATTTCATTGGGTTTAAAGGGTGC  
GCAGGCGGAATGATAAGTCAGTGGTGAAATCCTACAGCTCAACTGTAGAACTGCCATTGA  
TACTATCGTTCTTGAGTACATTTGAAGTGGGCGGAATGTGTCATGTAGCGGTGAAATGCT  
TAGATATGACACAGAACACCGATCGCGAAGGCAGCTCACTAAGTTGTAAGTACGCTCAT  
GCACGAAAGCGTGGGGATCAAACAGGATTAGATACCCGAGTAGTCC

>Otu10211

CCAGCCTATGGGGGGCAGCAGTAGGGAATCTTGCGCAATGGGGGCAACCCTGACGCAGCG  
ATGCCGCGTGAGTGAGGAAGGCCTTCGGGTGTAAACTCTGTTCTGCGGGAAAAACGGA  
CTTCCGGTAAATAATCGGAGGTAGTGATGGTACCGCAGGAGAAAGCACCGGCTAACTTCG  
TGCCAGCAGCCGCGGTAATACGAAGGGTGCAAGCGTTGTTTCGGAATTATTGGGCGTAAAG  
GGCGAGTAGGCGGATGGAGAAGTCAGATGTGAAATCTCGGGGCCTAACCCCGAAACTGCG  
TCTGAAACTTTCCATCTAGAATCTCGAAGAGGGAAGGGGAATTTTCGCATGTAGGAGTAAA  
ATCCGTAGAGATGCGAAGGAACACCAGAGGCGAAGGCGCCTTCCTGGGAGAGTATTGACG  
CTGAGGCGCGAAAGCGTGGGGAGCAAACAGGATTAGATACCCCGGTAGTCC

>Otu10212

CCGCCTACGGGAGGCAGCAGTGAGGAATATTGGTCAATGGGCGCAAGCCTGAACCAGCCA  
TCCCGCGTGACAGGAAGAAGGCGCTATGCGTCGTAAACTGCTTTTCCGGAGGAAGAAAACC  
CGCTACGAGTAGCGGTTTGCCGGTACTCTGGGAATAAGCATCGGCTAACTCCGTGCCAGC  
AGCCGCGGTAATACGGAGGATGCAAGCGTTATCCGGATTTCATTGGGTTTAAAGGGTGCGC  
AGGCGGAATGATAAGTCAGTGGTGAAATCCTACAGCTTAACTGTAGAACTGCCATTGATA  
CTGTCGTTCTTGAGTACAGTTGGAGTGGGCGGAATGTGTCATGTAGCGGTGAAATGCTTA  
GATATGACACAGAACACCGATTGCGAAGGCAGCTGACGAAACTGTAAGTACGCTGAGGC  
ACGAAAGCGTGGGGATCAAACAGGATTAGATACCCCTCGTAGTCC

>Otu10218

CCAGCCTATGGGGGGCACCAGTCGAGAATTTTTTCACAATGGGCGAAAGCCCGATGGAGCG  
ACGCCGCGTGGGGGATGAATGGCTTCGGCCCGTAAACCCCTGTCATTTCGGGAGCAATGCG  
TCTGGGTGAATAGCTCAGACGTTGATAGTACCGGAAGAGGAAGGGACGGCTAACTCTGTG  
CCAGCAGCCGCGGTAATACAGAGGTCCCAAGCGTTGTTTCGGATTTACTGGGCGTAAAGGG  
TGCGTAGGTGGTTGGGTAAGTCTGATGTGAAATCTCCGAGCTCAACTCGGAAATGGCATT  
GGAAACTGCTCTGCTCGAGGGTTGGAGGGGGGACTGGAATACTTGGTGTAGCAGTGAAAT  
GCGTAGATATCAAGTGGAACACCAGTGGCGAAGGCGAGTCCCTGGACAACCTCTGACACT  
GAGGCACGAAAGCTAGGGGAGCAAACAGGATTAGATACCCCTGTAGTCC

>Otu10229

TCAGCCTATGGGTGGCACCAGTAGGGAATATTGGTAATCTGCGAAAGCGGGAACCAGCAA  
CGCCGCGTGTCGATGAAGGCCTTCGGGTGCTAAAGCACTTTTTTAGAGGGATGAGGAAGG  
ACAGTACCTTTAGAATAAGCATCGGCTAACTTCGTGCCAGCAGCCGCGGTAATACGAAGG  
ATGCAAGCGTTATCCGGATTTATTGGGTTTAAAGGGTGCGTAGGCGGACTTATAAGTCAG  
TGGTGAAATCTCGTTGCTTAACAACGAACGTGCCATTGATACTGTAGGTCTTGAGTACAG  
ATGCCGTTGGCGGAATGTGTCATGTAGCGGTGAAATGCATAGATATGACACAGAACACCG  
ATTGCGAAGGCAGCTGACGAAACTGTAAGTACGCTGAGGCACGAAAGCGTGGGGATCAA  
ACAGGATTAGAGACCCCAGTAGTCC

>Otu10236

CCAGCCTACGGGAGGCACCAGCTAAGAATATTCCGCAATGGACGAAAGTCTGACGGAGCG  
ACGCCGCGTGATGACGAAGGCCGAAAGGTTGTAAAGTCCTTTTGTGGGGAAGAATAAC  
CATGGGAGGGAATGCCCGTGGGATGACATGAACCGACGAATAAGCCCCGGCTAACTACGT  
GCCAGCAGCCGCGGTAACACGTGGGGGGCGAGCGTTGTTTCGGAATTATTGGGCGTAAAGC  
GCGTGTAGGCGGCTTAGCAAGTCAGGTGTGAAAGCCCTCGGCTTAACCGAGGAAGTGC GC  
CTGAAACTATTGAGCTTGAGTACCGGAGAGGGCGGCGGAATTCCTGGTGTAGAGGTGAAA  
TTCGTAGATATCGGGAGGAACACCAGCGGCGAAGGCGGCCCTGGACGGTCACTGACGC  
TGAGACGCGAAAGCGTGGGTAGCAAACAGGATTAGAAACCCAGTAGTCC

>Otu10252

CCAGCCTACGGGAGGCTCCAGTGGGGAATATTGGACAATGGGCGAAAGCCTGATCCAGCG  
ACGCCGCGTGAGTGATGAAGGCCTTCGGGTGCTAAAGCTCTGTGCGGCGGGAACGAACAAG  
GGTGACCTAACACGTTATCCCCTGACGGTACTCGCAAAGGAAGCACCGGCTAACTCTGTG  
CCAGCAGCCGCGGTAAGACAGAGGGTGCAAGCGTTGTTTCGGAATTACTGGGCGTAAAGGG  
AGTGTAGGCGGCGGAGTGTGTCCGGCGTGAAAGACCTCGGCTCAACCGGGGAAGTGCGTT

GGATCCTACTTTGCTAGAGTGTGAGAGAGGGTGGCGGAATTGTCAGTGTAGAGGTGAAAT  
TCGTAGATACCGGCAGGAACACCGGAGGCGAAGGCGGCCACCTGGATCACAACCTGACGCT  
GAAACTCGAAAGCGTGGGTAGCAAACAGGATTAGATACCCTCGTAGTCC

>Otu10254

CCAGCCTACGGGGCGCTCCAGTGAGGAATATTGCGCAATGGGCGAAAGCCTGATGGAGCG  
ACGCCGCGTGGGGGATGAATGGCTTCGGCCCGTAAACCCCTGTCATTCGGGATCAATGCC  
TGTTTCCTAACACGAAGCAGGTTGATAGTACCGGAAGAGGAAGGGACGGCTAACTCTGTG  
CCAGCAGCCGCGGTAATACAGAGGTCCCAAGCGTTGTTTCGGATTTACTGGGCGTAAAGGG  
TGCGTAGGCGGTTGGGTAAGTCTGATGTGAAATCTCTGGGCTCAACCCAGAAATGGCATT  
GGATACTATCCGGCTTGAGAGTTGGAGGGGGGACTGGAATACTTGGTGTAGCAGTGAAAT  
GCGTAGATATCAAGTGGAACACCAGTGGCGAAGGCGAGTCCCTGGACAACCTCTGACGCT  
GAGGCACGAAAGCTAGGGGAGCAAACAGGATTAGAAACCCTGGTAGTCC

>Otu10255

CCAGCCTTGGGATGCTCCAGTGGGGAATCTTGCACAATGGGGGCAACCCTGATGCAGCGA  
CGCCGCGTGAACGATGAAGCCCTTCGGGGTGTAAAGTTCTTTCGGCAGGGAAGATAGTGA  
CGGTACCTGCAGAAGCAGCTGCGGCTAACTACGTGCCAGCAGCCGCGGTAATACGTAGGC  
AGCGAGCGTTGTTTCGGAGTTACTGGGCGTAAAGGGTGTGTAGGCGGTGCTTTAAGTTTGG  
TGTGAAATCTCCCGGCTCAACTGGGAGGGTGCGCCGAATACTGAAGTGCTAGAGTATGGG  
AGAGGGAAGTGGAATTCCTGGTGTAGCGGTGAAATGCGTAGATATCAGGAGGAACACCTG  
TGGTGTAGACGGCTTCCTAGACCATAACTGACGCTGAGACACGAAAGCGTGGGTAGCAAA  
CAGGATTAGAAACCCCCGTAGTCC

>Otu10260

CCAGCCTATGGGGGGCTGCAGTAAGGAATATTGGACAATGGTGGCAACACTGATCCAGCC  
ATGCCGCGTGCAGGATGAAGGCGCTACGCGTTGTAACTGCTTTTGTACGAGAGAAAACC  
TATCTACGTGTAGATAGCTGATAGTATGGTAAGAATAAGCATCGGCTAACTTCGTGCCAG  
CAGCCGCGGTAATACGAAGGATGCAAGCGTTATCCGGATTTATTGGGCGTAAAGCGCGTG  
TAGGCGGTTTGGTAAGTTGGATGTGAAAGCTCCTGGCTTAACTGGGAGAGGTCGTTCAAT  
ACTGCCAGACTAGAGGATGGTAGAGGGAGGTGGAATTCTGGGTGTAGTGGTGAAATGCGT  
AGATATTCGGAGGAACACCAGTGGCGAAAAGCGGCCTCCTGGACCATTTCTGACGCTCATA  
CACGAAAGCTAGGGGAGCAAACGGGATTAGAAACCCGTGTAGTCC

>Otu10263

CCAGCCTACGGGTCGCAGCAGTAAGGAATATTGGACAATGGGGGCAACCCTGATCCAGCC  
ATGCCGCGTGAAGGATGAAGGCGCTATGCGTCGTAACTTCTTTTAACCAGGAAAAATTC  
TTATGTTTCTACATGAGCTGATTGTACCGGGAGAATAAGGATCGGCTAACTTCGTGCCAG  
CAGCCGCGGTAATACGAAGGATCCAAGCGTTATCCGGATTTATTGGGTTTAAAGGGTGCG  
TAGGCGGTTTGTAAAGTCAGTGGTGAAATCTTGCAGCTTAACTGTAAAATTGCCATTGAT  
ACTGACGATCTTGAGTACGTTTGACGTGGGCGGAATATGTCATGTAGCGGTGAAATGCTT  
AGAGATGACATAGAACACCGATTGCGAAGGCAGCTCACGAAACCGTAACTGACGCTGAGG  
CACGAAAGCGTGGGGATCAAACAGGATTAGAAACCCTGGTAGTCC

>Otu10264

CCAGCCTATGGGTGGCAGCAGTGAGGAATTTTCGTCAATGGGGGCAACCCTGAACGAGCA  
ACGCCGCGTGCAGGAAGAAGGTTTTTCGGATCGTAACTGCTTTTCTCTGGGACGAGAACG  
GACGGTACCAGAGGAATCAGCCTCGGCTAACTACGTGCCAGCAGCCGCGGTAATACGTAG  
GAGGCAAGCGTTGTCCGGATTTATTGGGCGTAAAGCGCACGTAGGCGGTCTGATCAGTCC  
AGGGTGACAGTTTCCGGCTTAACCGGAAAAGGACTCTGGAGACGGCACGACTTGAGGGCT  
TCAGAGGGATGTGGAATTCCAGGTGGAGTGGTGAAATGCGTAGAGATCTGGAAGAACACC  
AAAGGCGAAGGCAACATCCTGGGGAGTCACTGACGCTCGGGTGCGAAAGCTAGGGGAGCG  
AACGGGATTAGATACCCCCGTAGTCC

>Otu10272

CCAGCCTATGGGTCGCTCCAGCAGGGAATATTGGTAATCTGCGAAAGCGGGAACCAGCAA  
CGCCGCGTGTGCGATGAAGGTCTTCGGATCGTAAAGTGCTTTTCTGAGAGATGAGAAAGG  
ACAGTATCTCAGGAATAAGTCTCGGCTAACTACGTGCCAGCAGCCGCGGTAACACGTAGG  
AGGCAAGCGTTATCCGGATTTACTGGGCGTAAAGCGCATGCAGGTGGTTCGGTAAGTTGG  
ATGTGAAAGCTCCTGGCTCAACTGGGAGAGGTCGTTCAATACTACCGGACTTGAGAGCAG  
TAGAGGGAGGTGGAGTTCCCGGTGTAGTGGTGAAATGCGTAGATATCGGGAGGAACACCA  
GTGGCGAAAGCGGCCTCCTGGACTGTTTTCTGACACTCATATGCGAAAGCTAGGGTAGCAA  
ACGGGATTAGATACCCCTGTGTCC

>Otu10274

CCAGCCTATGGGGGGCACCAGTAAGGAATATTGGACAATGGTGGCAACACTGATCCAGCC  
ATGCCGCGTGAGGATGAAGGCGCTACGCGTTGTAAACTGCTTTTGTACGGGAGAAAAAC  
TATCTACGTGTAGATAGCTGATAGTACCGTAAGAATAAGCATCGGCTAACTTCGTGCCAG  
CAGCCGCGGTAATACGAAGGATGCAAGCGTTATCCGGATTTATTGGGTTTAAAGGGTGCG  
TAGGCGGACTTATAAGTCAGTGGCGAAATCTCGTTGCTTAACAACGAACGTGCCATTGAT  
ACTGTAGGTCTTGAGTACAGATGCCGTTGGCGGAATGTGTCATGTAGCGGTGAAATGCAT  
AGATATCGGAAGGAACACCTGTGGCGAAAGCGGCTCACTGGACCATAACTGACGCTGATG  
CACGAAAGCTAGGGGGGCAAACAGGATTAGAAACCCCAGTAGTCC

>Otu10275

CCAGCCTATGGGATGCAGCAGTGGGGAATTTTGGACAATGGGCGAAAGCCTGATCCAGCG  
ACGCCGCGTGAGGATGAAGGCCTTCGGGTTGTAAACTCCTTTTAGAGGGAACGAAAAAA  
ATGACGGTACCCCTCAGAAAAAGCCACGGCTAACTACGTGCCAGCAGCCGCGGTAATACGT  
AGGTGGCGAGCGTTACTCGGATTTACTAGGCGTAAAGCGCTTGTAGGTGGTCATATAAGT  
CTGTAGTGAAATCTCCCGGCTCAACTGGGAGGGGTCTACAGAACTATATGGCTTGAGTG  
TGGCAGGGGGAAACGGAATTCCCGGTGTAGCGGTGAAATGCGTAGATATCGGGAGGAACA  
CCAATGGCGAAAGCAGTTTCTGGGCCAATACTGACACTGAGGAGCGAAAGCTAGGGGAG  
CAAACAGGATTAGAGACCCCTGTAGTCC

>Otu10283

CCAGCCTATGGGGGGCACCAGTGGGGAATATTGGACAATGGGCGCAAGCCTGATCCAGCC  
ATGCCGCGTGAGTGAAGAAGGCCTTAGGGTTGTAAAGCTCTTTTGGCGGGACGATAATG  
ACGGTACCCGCGAGAATAAGCCCCGGCTAACTTCGTGCCAGCAGCCGCGGTAATACGAAGG  
GGGCTAGCGTTGTTCCGAATCACTGGGCGTAAAGCGTACGCAGGCGGTTGGGTAAGTCTG  
ACGTGAAATCTCCGGGCCTAACCCGGAACCTGCGTTGGATACTATCCGGCTAGAGGAATG  
GAGGGGAGACTGGAATACTTGGTGTAGCAGTGAAATGCGTAGATATCAAGTGGAACACCA  
GTGGCGAAGGCGAGTCTCTGGACATTTCTTGACGCTGAGGCACGAAAGCCAGGGGAGCAA  
ACAGGATTAGAGACCCCTGTAGTCC

>Otu10299

CCAGCCTATGGGATGCTGCAGTGGGGAATATTGGACAATGGGGGCAACCCTGATCCAGCA  
ATGCCGCGTGAGTGAAGAAGGCCTGAGGGTTGTAAAGCACTTTCAGTGGGGAGGAGGGTT  
GTTTGGTTAAGAGCTGAATAATTGGACGTTACCCACAGAAGAAGCACCCGGCTAACTCCGT  
GCCAGCAGCCGCGGTAATACGGAGGGTGCGAGCGTTAATCGGAATTACTGGGCGTAAAGG  
GTGCGTAGGTGGTTGGATAAGTTATCTGTGAAATCCCCGGGCTCAACCTGGGAAGGTCAG  
ATAAGACTGTTTGAAGTACGAGTATAGGAGAGGGTAGTGGAATTTCCGGTGTAGCGGTGAAA  
TGCGTAGAGATCGGAAGGAACACCGGTGGCGAAGGCGGCTTCCTGGCATGTAAGTACGCG  
TCATGTTTCGAAAGCGTGGGTAGCAAACAGGATTAGAAACCCCTGTAGTCC

>Otu10326

CCAGCCTACGGGGTGCTGCAGTGAAGGAATCTTCCACAATGGGCGAAAGCCTGATGGAGCA  
ACGCCGCGTGAGGACGAAGGCCCTCGGGTCGTAAACTGCTTTTATAAGTGAAGAATATG  
ACGGTAGCTTATGAATAAGCACCGGCTAACTACGTGCCAGCAGCCGCGGTCATACGTAGG  
GTGCAAGCATTATCCGGAGTGACTGGGCGTAAAGAGTTGCGTAGGTGGTTTGTAAAGTGA  
ATGGTGAAATCTGGTGGCTCAACCACACAGACTATTATTCAAACCTGGCAAACCTCGAGAGT  
AGCAGAGGTAAGTGAATTTCTAGTGTAGGAGTGAAATCCGTAGATATTAGAAGGAACAC  
CAATGGCGTAGGCAGGTTACTAGGCTATTTCTGACACTGAGGCACGAAAGCGTGGGGAGC  
GAACCGGATTAGAAACCCCTGTAGTCC

>Otu10334

CCAGCCTATGGGGCGCACCAGTGGGGAATATTGGACAATGGGGGAAACCCTGATCCAGCC  
ATGCCGCGTGAGTGAAGAAGGCCTTAGGGTTGTAAAGCACTTTCGACGGGGACGATGATG  
ACGGTACCCGTAGAAGAAGCCCCGGCTAACTTCGTGTCAGCAGCCGCGGTAATACGAAGG  
GGGCTAGCGTTGCTCGGAATGACTGGGCGTAAAGGGCGCGTAGGCGGTTTGGTGAGTTAG  
GCGTGAAATTCCTGGGCTTAACCTGGGGACTGCGTTTAAATACCGCCAGACTTGAGTGAGG  
AAGAGGGTTGTGGAATTCAGAGTGTAGAGGTGAAATTCGTAGATATTGGGAAGAACACCG  
GTGGCGAAGGCGGCAACCTGGTCCTTGACTGACGCTGAGGCGCGAAAGCGTGGGGAGCAA  
ACAGGATTAGAAACCCGCGTAGTCC

>Otu10336

CCAGCCTACGGGGGGCACCAGTGAAGGAATTTTGGGCAATGGGCGAAAGCCTGACCCAGCG  
ACGCCGCGTGGGTGATGAAGGCCTTCGGGTCGTAAACCCCTGTGAGATGGGAAGAAGCCG  
TTTCGTGCTAATACCACGGCGCGGTGACAGTACCATCAGAGGAAGCCCCGGCTAACTACG  
TGCCAGCAGCCGCGGTAAAACGTAGGGGGCTAGCGTTGTTTCGGAATTACTGGGCGTAAAG

CGCGTGTAGGCGGCTTGGCAAAGTCGGAAGTGAAAGCCCCAGGCTCAACTTGGGAATTGCT  
TTCGAAACTGCCCTAGCTTGAGTGCGGGAGGGGAGAGCGGAATTCCAGGTGTAGCGGTGAA  
ATGCGTAGATATCTGGAGGAACACCGGTGGCGAAGGCGGCTCTCTGGACCGTAAGTACG  
CTGAGACGCGAAAGCGTGGGGAGCAAACAGGATTAGAAACCCTTGTAGTCC

>Otu10350

CCAGCCTACGGGGTGCACCAGTGGGGAATCTTGCACAATGGGGGAAACCCTGATGCAGCG  
ACGCCGCGTGAGCGATGGAGCCCTTCGGGGTGTAAGCTCTTTCGGCAGGGAAGATTATG  
ACGGTACCAGTGGAAGAAGCACCGGCTAACTCTGTGCCAGCAGCCGCGGTAATACAGAGG  
GTGCGAGCGTTGTTTCGGAATTATTGGGCGTAAAGGGCGCGTAGGCGGTGTTGTAAGTCAC  
CTGTGAAACCTCTGGGCTTAACTCAGAGCCTGCAGGTGAAACTGCAATGCTGGAGGGTGG  
GAGAGGTGCGTGGAATTCCCGGTGTAGCGGTGAAATGCGTAGATATCGGGAGGAACACCT  
GTGGCGAAAGCGGCGCACTGGACCACTACTGACGCTGAGGCGCGAAAGCCGGGGGAGCAA  
ACAGGATTAGATACCCGTGTAGTCC

>Otu10355

CCAGCCTACGGGTGCGACCAGTCGAGAATCATTCGCAATGGGCGAAAGCCTGACGATGCG  
ACGCCGTGTGAGCGATGAAGGCCCTTAGGGTTGTAAAGCTCTCTCGCCTGGGAACAAGAGG  
ATAGGCATAAAACGCTTAGAATTTGAGGGTACCAGGTAAAGAAGCACCGGCTAACTCCGT  
GCCAGCAGCTGCGGTAATACGGAGGGTGCAAGCATTAAATCGGATTTATTGGGCGTAAAGG  
GCGTGTAGGCGGGGATAAAAGTCAGATGTGAAATCCCGGGGCTCAACCTCGGAACAGCAT  
TTGAAACTCTATTTCTTGAGGGTAGGAGGAGAAAACGGAATCCACATGTAGCGGTGAAA  
TGCGTAGATATGCGGAAGAACACCGGTGGCGAAGGCGGTTTTCTATCTTACTCCTGACGC  
TGAGGCGCGAAAGCAAGGGGAGCAAACAGGATTAGATACCCTTGTAGTCC

>Otu10357

CCAGCCTACGGGTGCGCAGCAGCTAGGAATATTCGCAATGGACGAAAGTCTGACGGAGCG  
ACGCCGCGTGACGGTGAAGGCCCTTCGGGTGTAAAGTCCCTTTCGTGCGGGAAGATTTTT  
TCCGGTGTGAACAATGCCGGAGATCGACTGTACCGCAGGAAGAAGCCCCGGCTAATTACG  
TGCTTGCAGCCGCGGTATTACGTATGGGGCGAGCGTTATTCGGATTCATTGGGCGTAAAG  
CGTATGTGCGGGGTCTGAAAAGTCGGAGGTGAAATTTTCTGCTTAACATGAAAATTGCT  
TCCGAAACTGCCAGACTGGAGTTTTGGAGAGGAGATTGGAATTCCAGGTGTAGGGGTGAA  
ATCTGCAGATATCTGGAAGAACACCAGTGGCGAAGGCGAATCTCTGGCCAAAAACTGACC  
CTTAGATACGAAAGCCAGGGGAGCAAACGGGATTAGATACCCCGGTAGTCC

>Otu10359

GGACTACGGGGGTTTTCTAATCCTGTTTGCTCCCCTAGCTTTCGTTTCTCAGCGTCAGTAG  
TGATCCAGCTCGCCGCTTTTCGCCACGGGTGTTTCTGCAGATATCTACGCATTTACCGCT  
ACACCTGCAATTCCACGAGCCTCTCTCACACTCAAGCACAGCAGTTTTTGAAGCAGCCTC  
TGGGTAAAGCCCAGAGATTTCACTCCCAACTTGCCGCACCGCCTACGAACCCTTTACACC  
CAGTAATTCCGAACAACGCTGGCCCCCTACGTCTTACCGCGGCTGCTGGCACGTAGTTAG  
CCGGGGCTTCTTATACTGGTACCGTCAATCCCTTGCGGGTTTTCGTCCCAGTCGAAAGGG  
GTTTACACTCCGAAAAGCTTCATCCCCACGCGGCGTCTGCTGCATCAGGCTTTCGCCCAT  
TGTGCAAGATTCCCCACTGCTGCCCCATAGGCTGG

>Otu10361

CCAGCCTATGGGTTGCTGCAGTTCGGAATATTCGGCAATGGGCGCAAGCCTGACCGAGCG  
ACGCCGCGTGCGGGATGAAGGCCCTCTGGGTTGTAAACCGCTGTCACAGGTGAGCAAATC  
AGCCGGTTCCAACAAAGCCGGCTGTTGAGTTAAGCTTGAGAGGAAGCCCCGCTAATCAC  
GTGCCAGCAGCGCGGTAATACGTGAGGGGCGAACGTTGTTTCGGTGTCACTGGGCTTAAA  
GGGCACGTAGGTGGCTGCGTAAGTAAGGTGTGAAAGCCCTCGGCTTACCCGGGGAATCGC  
GCCTTATACTGCGTGGCTTGAGGGTCACAGGGGAAGGGGGAATCCAGGTGTAGCGGTGA  
AATGCGCAGATATCTGGGGGAAGGCCGGCGGCGAAGGCGACCTTCTGGGTGATTCTGAC  
ACTGAGGCGCGAAAGCGTGGGGAGCAAACAGGATTAGATACCCGTGTAGTCC

>Otu10368

CCAGCCTATGGGGGGCAGCAGGCATTGAGCCGGAGGAAGCAAGAGAAATGTATAGCCGGT  
TTTTAATAACAAGGATTGAAAATGCTGATATATTTTTAAACGAAGCAAAACATGCCAGGA  
AATCACTTATTTGAGTATGCCGTTATACGTGTAATGCCAAAAGTGGAATGTGAAGAGTTT  
CTCAATGTGGGTGTGATCCTGTATTGTAAGGATAAAAAGTTTTTGCAGGCTGTTTTTAA  
CTGAATGAGGAACGGCTCCGTAATTTTTTCAACAACAGATCGATATTGAAGAGTTAAAGAA  
CACCTGTGTTCTTTTAAACAGATATGCCGTGGGGGTGCCGACGCAGGACCTATCGGTAAA  
CTCGATATTGCTTCCCGTTTCCGATGGCTCACAGGTACCCGTAGTACCATTGTTCAAACA  
TCGAAAGTGACACCCTGGTTTGTGCAACGATCCATTAGATACCCCTGTAGTCC



>Otu10371

CCAGCCTACGGGATGCAGCAGTGGGGAATATTGCACAATGGGCGAAAGCCTGATGCAGCG  
ACGCCGCGTGAGGATGAAGGTTTTTCGGATTGTAAACTCCTGTAAAGTGGGAAGAAAGAC  
CGTTTTCTAATAAAAAACGGGGATGACGGTACCCTAGAGAAAGCACCGGCAAACCTTCGT  
GCCAGCAGCCGCGTAATACGAAGGGTGCAGCGTTATTTCGGAATAACTGGGCGTAGAGA  
GTTTGAAGGCGGCTTTTTTAAGTCAGCTGTAAATCCCCCGGCTTAACCGGGGATATGCAG  
TTGATACTGGAGAGCTAGAGTTTGGGAGAGAAGGGTAGAATTCTCGGAGTAGCGGTAAAA  
TGCGTAGATCTCGAGAGGAATACCGGTTGCGAAGGCGGCCCTTTAGCCCAATACTGACGC  
TCAAGAACGAAAGCGTGGGGAGCAAACAGGATTAGATACCCTCGTAGTCC

>Otu10376

CCAGCCTATGGGATGCACCAGTTAGGAATCTTGCGCAATGGGCGAAAGCCTGACGCAGCA  
ACGCCGCGTGAGGGATGAATGCTTTTCGGGTGTAAACCTCTTTCAGCAGGAACGAAAATG  
ACGGTACCTGCAGAAGAAGCTCCGGCCAACTACGTGCCAGCAGCCGCGGTAATACGTAGG  
GAGCAAGCGTTGTCCGATTTATTGGGCGTAAAGAGCTCGTAGGCGGTTTAGAAAGTCAG  
GTGTGAAACCTCCAGGCTCAACCTGGAGACGCCACTTGATACTTCTATGACTTGAGTTTCG  
GTAGGGGACCATGGAATTCCTGGTGTAGCGGTGAAATGCGCAGATATCAGGAGGAACACC  
GATGGCGAAGGCAGTGGTCTGGGCCGATACTGACGCTGAGGAGCGAAAGCGTGGGGAGCG  
AACAGGATTAGAAACCCAGTAGTCC

>Otu10378

CCAGCCTACGGGGCGCAGCAGTGGGGAATATTGGACAATGGGGGGAACCTGATCCAGCA  
ATGCCGCGTGTGTGAAGAAGGCCTGAGGGTTGTAAAGCACTTTCAGTGGGGAGGAGGCGT  
GACAGGTTAAGAGCTAGTTAAGCGGACGTTACCCACAGAAGAAGCACCGGCTAACTCCGT  
GCCAGCAGCCGCGTAATACGGAGGGTGCAGCGTTAATCGGAATTACTGGGCGTAAAGG  
GTGCGTAGGTGGTTTATTAAGTTATCTGTGAAAGCCCCGGGCTTAACCTGGGAAAGTCAG  
ATAAGACTGATAGACTTGAGTATGGGAGAGGGTAGTGGAATTTCCGGTGTAGCGGTGAAA  
TGCGTAGAGATCGGAAGGAACACCACTGGCGAAGGCGGCTACCTGGCCTAATACTGACAC  
TGAGGCACGAAAGCGTGGGGAGCAAACAGGATTAGATACCCTAGTAGTCC

>Otu10382

CCAGCCTACGGGTTGCTCCAGTAGGGAATCTTCCGCAATGGACGAAAGTCTGACGGAGCA  
ACGCCGCGTGAGTGAGGAAGGCCTTCGGGTCGTAAAGCTCTGTTGCCAGGGAAGAACGGG  
TGGAAGAGTAACTGCTTCCGCCATGACGGTACCTGAGAAGAAAGCCCCGGCTAACTACGT  
GCCAGCAGCCGCGTAATACGTAGGGGGCAAGCGTTGTCCGGAATTATTGGGCGTAAAGC  
GCGCGCAGGCGGCTTTGTAAAGTCCGGTGTTTAATCTTGGGGCTCAACCCCAAGTCGCACG  
GGAACTGCAAGGCTTGAGTGCAGAAGAGGAAAGTGGAATTCACGTGTAGCGGTGAAAT  
GCGTAGAGATGTGGAGGAACACCACTGGCGAAGGCGACTTTCTGGGCTGTAAGTACGCT  
GAGGCGCGAAAGCGTGGGGAGCAAACAGGATTAGATACCCTAGTAGTCC

>Otu10386

CCAGCCTATGGGGGGCTGCAGTCGAGAATCTTTCGCAATGGGCGAAAGCCTGACGAAGCG  
ACGCCGTGTGAGTGATGAAGGCCTTCGGGTCGTAAAGCTCTTTCGCTTGGAACAAGAGA  
GGCCGGCTAATATCCGGCCAAATTTGAGGGTACTAGGTAAAGAAGCACCGGCTAACTCCGT  
GCCAGCAGCTGCGTAATACGGAGGGTGCAGCATTAATCGGATTTATTGGGCGTAAAGG  
GCGCGTAGGCGGGAATGTAAGTCAGATGTGAAATCCCGGGGCTCAACCCCGGAACAGCAT  
TTGAAACTGCATTTCTCAGAGGGTAGACGGAGAAAATGGAATTCACAAGTAGCGGTGAA  
ATGCGTAGATATGTGGAAGAACACCACTGGCGAAGGCGATTTTCTAGTTTATACCTGACG  
CTAAAGCGCGAAAGCTAGGGGAGCAAACAGGATTAGAAACCCCGTAGTCC

>Otu10395

CCAGCCTACGGGGTGCTCCAGTTAGGGAACCTTTCACACTGGGCGCAAGCCTGATGGAGTA  
ACGCCACGTGGGCGATGAAGGTCTTCGGATCGTAAAGCCCTTTTCTGGGGGACGAGGAGA  
AGACGGTACCCCAGGAAGAAGTCTCGGCTAACTACGTGCCAGCAGCCGCGGTAATACGTA  
GGAGGCGAGCGTTGTCCGGAATTACTGGGCGTAAAGAGCGTGTAGGCGGTCCGTCATGTC  
GCCCTTGAAAGCCCTCTGCTCAACGGGGGGAGGGAGGGCGAAACGGGCGGACTCGATGGA  
GTCTGGTAGGGGGAGGCGGAACGGCCGGTGGAGCGGTGAAATGCGTAGAGATCGGCCAGA  
ACACCAGTGGCGAAGGCGGCCCTCCTGGGCCGAACTGACGCTGAGACGCGACAGCGTGGG  
GAGCGAACGGAATTAGAGACCCGCGTAGTCC

>Otu10398

CCAGCCTACGGGAGGCAGCAGTCGAGAATTTTTCTTAATGGGGGCAACCTGAAGGAGCG  
ACGCCGCGTGAGGATGAAGGTCTTCGGATTGTAAACTCCTGTCAATTGGTGAACAAGGCC  
TTCCGGTTAACTGCCGGTGAGGTTTCGATAGTAGCCGAAGAGGAAGGGACGGCTAACTCTG

TGCCAGCAGCCGCGGTAATACAGAGGTCCCAAGCGTTGTTCCGATTTCATTGGGCGTAAAG  
GGTGCGTAGGCGGCGGGGTCAGTCTGATGTGAAAGGCCGGGGCTCAACCCCGGAACGGCA  
TTGGATACTGCCTTGCTAGAGAACTGGAGAGGAGACTGGAATTTACGGTGTAGCAGTGAA  
ATGCGTAGAGATCGTAAGGAAGACCAGTGGCGAAGGCGAGTCTCTGGACAGATTCTGACG  
CTGAGGCACGAAGGCCAGGGGAGCAAACGGGATTAGATACCCCTGTAGTCCC

>Otu10408

CCAGCCTACGGGTTGCAGCAGTGGGGAGTATTGCGCAATGGGCGAAAGCCTAACGCAGCG  
ACGCCGCGTGAAGGATGAAGGTCTTCGGATTGTAACTTCTGTTAAGTGGGAAAAAGCA  
TCATGCTTAATACGTATGGTGGATGATGGTACCACTAGAGAAAGCACCGGCTAATCTCGT  
GCCAGCAGCCGCGGTAATACGAGAGGTGCAAGCGTTATTCGGAATTATTGGGCGTAAAGG  
GTGCGTAGACGGTGTGCTTAGTCTGTTGTTAAATCTTTCGGCTTAACCGAAAATCAGCAA  
TGGATACTGGCATGCTAGAGTGTGAAAGAGAGAAGTGGAAATCTTGGAGTAGCGGTAAAA  
TGCGTAGATCTCAAGAGGAACACCGATGGCGAAGGCAGCTTCTTGGTTCACTACTGACGT  
TGAGGCACGAAAGCGTGGGGAGCAAACAGGATTAGAGACCCAGTAGTCC

>Otu10414

CCAGCCTATGGGTGGCAGCAGTGGGGAATATTGGACAATGGGGGGAACCCTGATCCAGCA  
ATGCCGCGTGTGTGAAGAAGGCCTGGGGGTTGTAAAGCACTTTCAGTGGGGAGGAGGATT  
GGCAGGTTAAGAGCTGGCTGATTGGACGTTTCCACAGAAGAAGCACCGGCTAACTCCGT  
GCCAGCAGCCGCGGTAATACGGAGGGTGCAAGCGTTAATCGGAATTACTGGGCGTAAAGG  
GTGCGCAGGTGGTTTGATAAGATATCTGTGAAATCCCCGGGCTCAACCTGGGAAGGTGAG  
ATGTGACTGTGCACTCGAGTATGGGAGAGGGTAGTGGAAATTTCCGGTGTAGCGGTGAAA  
TGCGTAGAGATCGGAAGGAACACCACTGGCGAAGGCGGCTACCTGGCCTGATACTGACAC  
TGAGGCACGAAAGCGTGGGGAGCAAACAGGATTAGATACCCCTCGTAGTCC

>Otu10421

CCAGCCTATGGGAGGCACCAGTCAAGAACATTCGACAATGGGCGAAAGCCTGATCGAGCG  
ACACCGCGTGCAGGATGAAGGCCTTCGGGTCGTAAACTGCGGTAGTATGGTAACAATGCA  
AATGAGTGCCATACGGAAAGAGGTGGGTAACCTACGTGCCAGCACCAGCGGTAATACGTAG  
ACCTCAAGCGTTATCCGGATTTATTGGGCGTAAAGAGCATGTAGGAGGTTTTGCACGTCT  
GTGGTTAAAGCCCATCGCCTAACGATGGAATCGCCACGGATACGGCAAGACTAGAGGGGG  
TTAGAGGTGCATAGAACGCACGGTGTAGGGGTGAAATCCGTTGATATCGTGCGGAATACC  
AAAGGCGAAGGCAGTGCCTGGGACCTTCCTGACTCTGAGATGCGAAAGCGTGGGGAGCA  
AAAAGGATTAGAAACCCGCGTAGTCC

>Otu10443

CCAGCCTATGGGGCGCTGCAGTGGGGAATCTTGACAATGGGCGAAAGCCTGATGCAGCA  
ATGCCGCGTGAGTGATGAAGGCCTTCGGGTTGTAAATCTCTGTGCGCCGGGACAAATGTG  
TTCTTATTTAATAAATAAGGGCAGCGATGGTACCGGTAAAGGAAGAGGCGGCTAATCTG  
TGCCAGCAGCCGCGGTAATACAGAAGCCTCAAGCGTTGTTCCGAATTACTGGGCGTAAAG  
GGAATGTAGGCGGTAGCGTAAGTCAGATGTGAAAGCCCGGGGCTTAACCTGGAAGTGCA  
TTTGATACTGCGTTGCTAGAGTGCGAAAGAGGAAAGTGGAAATCCATGTGTAGGGGTGAA  
ATCCGTAGATATGTGGAGGAATACCAATGGCGAAAGCAGCTTCTGTTTCGTAACCTGACG  
CTGAGATTCGAAAGCGTGGGTAGCAAACAGGATTAGAAACCCTAGTAGTCC

>Otu10445

CCAGCCTATGGGAGGCACCAGTGAGGAATATTGGTCAATGGGCGCAAGCCTGAACCAGCC  
ATCCCGCGTGCAGGATGAAGGCCCTATGGGTCGTAAACTGCTTTTATACACCAAGAAAAA  
CATCCACGTGTGGGTGCCCCGACGGTAGTGATGAATAAGCATCGACTAACTCCGTGCCAG  
CAGCCGCGGTAATACGGAGGATGCAAGCGTTATCCGGATTTCATTGGGTTTAAAGGGTGCG  
TAGGCGGCTTTTTAAGTCAGTGGTGAATCTTGCCGCTTAACGGTAAAAATTGCCATTGAT  
ACTGAAGAGCTTGAGTACAGTTGAGGTAAGCGGAATGTGTAGTGTAGCGGTGAAATGCTT  
AGATATTACACAGAACACCGATTGCGAAGGCAGCTTACTAAGCTGTTACTGACGCTGATG  
CACGAAAGCGTGGGGAGCGAACAGGATTAGATACCCAGTAGTCC

>Otu10447

CCAGCCTATGGGGGGCACCAGTGGGGAATCTTGACAATGGACGAAACCCTGATCCAGCC  
ATGCCGCGTGATGATGAAGGCCCTAGGGTTGTAAAGTCCTTTCGACGGGGAAGATAATG  
ACGGTACCCGTAGAAGAAGCCCCGGCTAACTTCGTGCCAGCAGCCGCGGTAATACGAAGG  
GGGCTAGCGTTGCTCGGAATCACTGGGCGTAAAGCGCACGTAGGCGGACTCTTAAGTCGG  
TGGTGAAATCCTGGAGCTCAACTCCAGAACTGCCTTCGATACTGAGAGTCTTGAGTCCGA  
GAGAGGTGAGTGGAATGCGAGTGTAGAGGTGAAATTCGTAGATATTTCGAAGAACACCA  
GTGGCGAAGGCGGCTCACTGGCTCGGTACTGACGCTGAGGTGCGAAAGCGTGGGGAGCAA

ACAGGATTAGAAACCTCGTAGTCC

>Otu10450

CCAGCCTACGGGTGGCACCAGTTGGGAATCTTGGACAATGGGGGAAACCCTGATCCAGCC  
ATGCCGCGTGAGTGATGAAGGCCTTCGGGTGTAAAGCTCTTTTACCCGGAAGATAATG  
ACGGTACCGGAAGAAGAAGCCCCGGCTAACTTCGTGCCAGCAGCCGCGGTAATACGAGGG  
GGGCAAGCGTTGTTCCGAATTATTGGGCGTAAAGGGTGCGTAGGCGGTTTGTAAGTCTT  
TTGTGAAATCTATGGGCTCAACTCATAGACTGCAAGGGAACTGCCGGGCTTGAGTGTGG  
GAGAGGTGAGTGGAATTTCCGGTGTAGCGGTGAAATGCGTAGATATCGGAAGGAACACCT  
GTGGCGAAAGCGGCTCACTGGACCACAACCTGACGCTGATGCACGAAAGCTAGGGGAGCAA  
ACAGGATTAGATACCCCAGTAGTCC

>Otu10465

CCAGCCTACGGGTGCGCACCAGTAGGGAATTTTCCACAATGGGCGAAAGCCTGATGGAGCA  
ACGCCGCGTGACAGGATGAATGCCTTCGGGTGTAAACTGCTTTTGTTAGTGACGATTATG  
ACGGTAGCTAACGAATAAGGGTCTGCTAACTACGTGCCAGCAGCCGCGGTCATACGTAGG  
ACCCAAGCGTTATCCGAATTACTGGGCGTAAAGAGTTGCGTAGGTGGCAAAGTAAGCGA  
ATAGTGAAAGCGTGTGGCTCAACCATAACATCCATTATTTCGGAAGTCTTAGCTAGAGAAGC  
AGAGAGGTAGATGGAATTTCTAATGTAGGGGTAATATCCGTAGATATTAGAAGGAACACC  
GATGGCGTAGGCAGTCTACCGGCTCGTTTCTGACACTAATGCACGAAAGCATGGGGAGCA  
AACAGGATTAGAAACCCGGGTAGTCC

>Otu10467

CCAGCCTATGGGTTGCTCCAGTGGGGAATCTTGGACAATGGGGGAGACCCTGATCCAGCC  
ATGCCGCGTGAGTGATGAAGGCCTTCGGGTGTAAACTCTTTCGACGGGGACGATAATG  
ACGGTACCCGCGAGAAGAAGCCCCGGCTAACTTCGTGCCAGCAGCCGCGGTAATACGAAGG  
GGGCTAGCGTTGCTCGGAATGACTGGGCGTAAAGGGCGCGTAGGCGGATGGCACAGTCAG  
ATGTGAAATTTCCCGGGCTTAACCTGGGGGCTGCATTTGATACGTGGTGTCTGGAGTGAGG  
AAGAGGGTTGTGGAATTTCCAGTGTAGAGGTGAAATTCGTAGATATTGGGAAGAACACCG  
GTGGCGAAGGCGGCAACCTGGTCCTTGACTGACGCTGAGGCGCGAAAGCGTGGGGAGCAA  
ACAGGATTAGAAACCCGCGTAGTCC

>Otu10472

CCAGCCTACGGGGGGCACCAGTGGGGAATCTTGCACAATGGACGAAAGTCTGACGCAGCA  
ACGCCGCGTGAGTGAAGAAGGCCTTCGGGTGTAAAGCTCTGTGCGAGCGAGACGAAAAAT  
TGGCTGGTGAATAGCCAGCCAATCTGACGGTACCGCTAAAGGAAGCACCGGCTAACTCCG  
TGCCAGCAGCCGCGGTAATACGGAGGGTGCAAGCGTTGCTCGGAATTATTGGGCGTAAAG  
GGTAGGTAGGTGGTCTCGTTTGTCTGGGGTGAATCCTTGAGCTTAACTCAAGAAGTGCC  
TCAGAAACGGCGAGACTAGAGTTCTGGAGAGGGTCTGGAATTCCCGGTGTAGCGGTGAA  
ATGCGTAGATATCGGGAGGAACACCAGAGGCGAAGGCGGCGACCTGGACAGATACTGACA  
CTAAACTACGAAAGCGTGGGGAGCAAACAGGATTAGATACCCTAGTAGTCC

>Otu10478

CCAGCCTATGGGTTGCAGCAGTGGGGAATTTTACACAATGGGGGAAACCCTGATGTAGCG  
ACACCGCGTGAGCGAAGAAGCCCTTTGGGGTGTAAAGCTCTGTGCGTAGGGGACGAAAAA  
ATGACGGTACCTCAAGAGGAAGCATCGGCTAACTACGTGCCAGCAGCCGCGGTAAGACGT  
AGGATGCGAGCGTTGTCCGGATTTATTGGGCGTAAAGAGTTTCGTAGGTGGTTCACTAAGT  
CTGGTGTAAAAGGCACGGGCTCAACTCGTGTATCGCGTTGGATACTGGTGGACTGGAGTG  
GAGTAGAGGCAAGCGGAATTTCCAGTGTAGCGGTGAAATGCGTAGATATTGGGAAGAACA  
TCGGTGGCGCAAGCGGCTTGCTGGGCTTTAACTGACACTGAGGAACGAAAGCTAGGGGAG  
CAAATGGGATTAGAGACCCGCGTAGTCC

>Otu10483

CCAGCCTATGGGTTGCTCCAGTGGGGAATCCTGGACAATGGGGGAAACCCTGATCCAGCC  
ATGCCGCGTGAGTGATGAAGGCCTTAGGGTGTAAACTCTTTCGACGGGGACGATAATG  
ACGGTACCCGTAGAAGAAGCTCCGGCTAACTTCGTGCCAGCAGCCGCGGTAATACGAAGG  
GGGCTAGCGTTGTTCCGAATTACTGGGTGTAAAGCGCGCGCAGGCGGCCTTCCAAGTCAG  
GGGTGAAAGCCCAGAGCTCAACTCTGGAATTGCCTTTGAAACTGTTAGGCTTGAGTACGG  
GAGAGGTGAGTGGAATTTCCAGTGTAGAGGTGAAATTCGTAGATATTGGGAAGAACACCG  
GTGGCGAAGGCGGCTCACTGGACCACAACCTGACGCTGATGCACGAAAGCTAGGGGAGCAA  
ACAGGATTAGAAACCCGAGTAGTCC

>Otu10484

CCAGCCTATGGGGTGCTGCAGTAGGGAATTTTCCGCAATGGGCGAAAGCCTGACGGAGCA  
ACGCCGCGTGAGTGAAGACGGTTTTTCGGATTGTAAAGCTCTGTTCTGTGGGAAGAAAAA

ATGACGGTACCATAGGAGAAAAGCCCCGGCTAACTACGTGCCAGCAGCCGCGGTAATACGT  
AGGGGGCAAGCGTTGTCCGGAATTATTGGGCGTAAAGTGCGCGCAGGCGGTTAATTAAGT  
CAGGTGTGAAAGGCTACGGCTCAACCGTAGAGTTGCATTTGAAACTGGTTAACTTGAGTG  
CAGGAGAGGTAAGTGGGAATTCGCGGTGTAGCGGTGGAATGCGTAGAGATCGGGAGGAACA  
CCAGTGGCGAAGGCGGCTTACTGGCCTGCAACTGACGCTGAGGCGCGAAAGCGTGGGGAG  
CAAACAGGATTAGATACCCGAGTAGTCC

>Otu10485

CCAGCCTACGGGGGGCTCCAGTGAGGAATCTTGGACAATGGGGGCAACCCTGATCCAGCG  
ATGCCGCGTGAGTGAAGAAGGCCTTCGGGTGCTAAAGCTCTTTAGGTTGGGACGAAGGTT  
ATGTGGGGATAATCCATGTAGCTTGACGGTACTAACAGAATAAGCACCGGCAAACCTCTGT  
GCCAGCAGCCGCGGTAATACAGAGGGTGCAAGCGTTAATCGGAGTTACTGGGCGTAAGGG  
GCGCGTAGGCGGTGAATTGGGTGTGGTGTGAAAGCCCCGGGCTTAACCTGGGAAGTGCAT  
CGCAAATAATTGACTGGAGTAGATGAGAGGGTGGCGGAATTTCCGGTGTAGCGGTGAAA  
TGCGTAGAGATCGGAAGGAACGTCAATGGCGAAGGCAGCCACCTGGCATCATACTGACGC  
TGAGGCGCGAGAGCGTGGGGAGCAAACAGGATTAGAAACCCCTGTAGTCC

>Otu10486

CCAGCCTACGGGGGGCTGCAGTAACGAATCTTCCGCAATGGGCGCAAGCCTGACGGAGCG  
ACGCCGCGTGTTGGGACGAAGTCCTTCGGGATGTAAACCACTGTCAGGGGTTAGAAAGTTC  
TGATCAACCCAGAGGAAGGCACGGCTAACTCTGTGCCAGCAGCCGCGCTAAGACAGAGG  
TGCCAAGCGTTAGGCGGAATCACTGGGCTTAAAGCGTGTGTAGGTGGATGCCTAAGTGCC  
TTGTGAAATCCCACGGCTCAACCGTGGAATTGCTGGGCATACTGGGTGTCTTGAGCCATC  
CAGGGGTGCGTGGAACAAACGGTGGAGCGGTGGAATGCGTAGATATCGTTTGGAACGCCA  
ATGGTGAAAACAGGCGACTGGGGATGAGCTGACACTGAGACACGAAAGCCAGGGGAGCAA  
ACGGGATTAGAAACCCCTGTAGTCC

>Otu10488

CCAGCCTACGGGGGGCAGCAGCCGAGGATCATTCGCAATGGGCGAAAGCCTGACGATGCG  
ACGCCGCGTGAGCGATGAAGGCCTTCGGGTGTAAAGCTCTTTCGCTTAGGAACAAGGGA  
ATATAGTGAATAACTATGTGACTTGAGGGTACTAGGTAAAGAAGCACCGGCTAACTCCGT  
GCCAGCAGCTGCGGTAATACGGAGGGTGCAAGCATTAATCGGAATTATTGGGCGTAAAGG  
GCGCGTAGGCGGATTTGTAAGTCAGATGTGAAATTCCGAAGCTCAACTTCGGAGCTGCAT  
TTGAAACTGTGAGTCTAGAGGGATGGCGGAGAAAATGGAATTCACGTGTAGCGGTGAAA  
TGCGTAGATATGTGGAAGAACACCGGTGGCGAAGGCGATTTTCTAGCTTTTTCCTGACGC  
TGAGGCGCGAGAGCAAGGGGAGCAAACAGGATTAGAAACCCAGTAGTCC

>Otu10489

CCAGCCTATGGGAGGCTCCAGTGGGGAATATTGGTCAATGGGCGAAAGCCTGAACCAGCA  
ATGCCGCGTGAGTGATGAAGGCCTTCGGGTGTAAAGCTCTGTGCGTGGGAACGAATAAG  
TCGGTTAATACTCGATGATGACGGTACCCACAAAGGAAGCACCGGCTAACTCTGTGCCAG  
CAGCCGCGGTAATACAGAGGGTGCAAGCGTTGTTTCGGAATTACTGGGCGTAAAGCGCGTG  
TAGGCGGTCTGATAAGTCGGTCGTGAAAGCCCTTGCTTAACCAAGGAAGTGCATCGAA  
ACTGCCGGAAGTAGAGTATCGGAGGGGATGGTGGAATTCGCGGTGTAGAGGTGAAATTCGT  
AGATATCGGGAGGAACACCTGTGGCGAAGGCGACCATCTGGAAGATTACTGACGCTGAGA  
CGCGAAAGCGTGGGGAGCAAACAGGATTAGATACCCAGTAGTCC

>Otu10494

CCAGCCTACGGGGGGCAGCAGTGGGGAATTTTGGACAATGGGCGCAAGCCTGATCCAGCA  
ATGCCGCGTGTTGAAGAAGGCCTTCGGGTGTAAAGCACTTTTGTCCGGAAGAAATCC  
TTTGAGTTAATACCTCGGGGGATGACGGTACCGGAAGAATAAGCACCGGCTAACTCTGT  
GCCAGCAGCCGCGGTAATACAGAGGGTGCGAGCGTTAATCGGAATTACTGGGCGTAAAGC  
GCGCGTAGACGGTTTGTTAAGTCAGATGTGAAATCCCCGGGCTCAACCTGGGAAGTGCAT  
TTGATACTGCCTGGCTAGAGTATCGAAGAGGGAAGTGAATTTCCGGTGTAGCGGTGAAA  
TGCGTAGATATCGGAAGGAACACAGTGGCGAAGGCGACTTCCTGGTCGAATACTGACGT  
TCATGTGCGAAAGCGTGGGGAGCAAACAGGATTAGAAACCCAGTAGTCC

>Otu10497

CCAGCCTATGGGTCGCAGCAGTGGGGAATCTTGCGCAATGGACGAAAGTCTGACGCAGCG  
ACGCCGCGTGGGCGACGAAGGCCTTCGGGTGTAAAGCCCTGTGGGGAGAGACGAACACG  
CTAAGCTCAAATAGGGCGGAGCGCTGACGGTATCTCCTTAGCAAGCACCGGCTAACTCTG  
TGCCAGCAGCCGCGGTAAGACAGAGGGTGCAAACGTTGCTCGGAATTACTGGGCGTAAAG  
CGCGTGTAGGCGGGCCTGCCAGTCAGGTGTGAAAGCCCCGGGCTCAACCCCGGAAGTGCA  
TTTGATACTACAGGTCTTGAGTACTGACGAGGAGAGCGGAATTCGCGGTGTAGAGGTGAA

ATTCGTAGATATCGGGAGGAACACCAGTGGCGAAGGCGGCTCTCTGGGCAGATACTGACG  
CTGAGACGCGAAAGCATGGGGAGCAAACAGGATTAGATACCCTTGTAGTCC  
>Otu10500  
CCAGCCTACGGGGGGGCTGCAGTGGGGAATTTTGGGCAATGGCCGAAAGGCTGACCCAGCA  
ACGCCGCGTGAAGGATGAAATCCTTCGGGATGTAACTTCGCAAATAAGGGAAGAATAAA  
GGTAAGCTAATACCCTATCATATGACGGTACCTTATGTAAGCCCCGGCTAACTCCGTGCC  
AGCAGCCGCGGTAATACGGGGGGGGCAAGCGTTGTTTCGGAATACTGGGCGTAAAGGGCG  
CGTAGGCGGTGACACCAAGTCGAATGTGAAATACCAGGGCTTAACTCTGGCAGGTGCTTC  
GATACTGGTCTGACTAGAGTGTGGAAGAGGATGTCGGAATCCCGGTGTAGCGGTGAAATG  
CGTAGATATCGGGAGGAACACCAGCGGCGAAGGCGGGCATCTGGGCCAACACTGACGCTG  
ATGCGCGAAAGCTAGGGGAGCAAACAGGATTAGATACCCTAGTAGTCC  
>Otu10503  
CCAGCCTATGGGGGGGACCAGTGGGGAATTTTGC GCAATGGGGGAAACCCTGACGCAGCA  
ACGCCGCGTGGAGGATGAAGCCCCTTGGGGCGTAACTCCTTTTCGACCAAGACGATGATG  
ACGGTACTGGTGGAAGAAGCACC GGCTAACTCTGTGCCAGCAGCCGCGGTAATACAAAGG  
GTGCGAGCGTTGTTTCGGAATTATTGGGCGTAAAGGGCGCGTAGGCGGTGCCACAAGTCAC  
TTGTGAAATCCCCGGGCTTAACCCGGGGCCTGCAGGCGAAACTGTGGTGCTGGAGTATGG  
GAGAGGTAAGCGGAATTCCTGGTGTAGCGGTGAAATGCGTAGATATCAGGAGGAACACCT  
GTGGTGTAGACAGCTTACTGGACCATCACTGACACTGAGACACGAAAGCGTGGGTAGCAA  
ACAGGATTAGAACCCCCGTAGTCC  
>Otu10505  
CCAGCTATGGGTTGCAGCAGTCGAGAATATTCGACAATGGGCGAAAGCCTGATCGAGCGA  
CACCGCGTGCGGGAAGAAGCTCTTCGGAGCGTAAACCGCTTTTGTTCAGGGAAGAATTTG  
ACGGTACCTGAAGAATAAGGGGTTGCTAACCTCGTGCCAGCAGCAGCGGTAATACGAGGA  
CCCCGAGCGTTATCCGGAATTACTGGGCGTAAAGCGTGAGCATCCGGTTGTGTTAGTCTC  
ATGTTAAATCTCACTGCTCAACGGTGAGACCGCGTGGGAAACGGCACGACTAGAGCGGGT  
AAGAGGCAAGCGGAACGTGCAGTGTAGGGGTGAAATCCATTGATATTGCACGGAACACCA  
AAAGCGAAAGCAGCTTGCTAGTGCTCTGCTGACGGTCAATCACGAAAGCGTGGGGATCAA  
AAAGGATTAGAGACCCCAGTAGTCC  
>Otu10509  
CCAGCCTATGGGGGGCAGCAGTGGGGAATATTGCGCAATGGGCGAAAGCCTGACGCAGCG  
ACACCGCGTGAGGATGAAGGCCTTCGGGTGTAACTTCTGTTAAGTGGGAAGAAAGAA  
CCATTTTTTAATAAAAATGGGTGATGACGGTACCATTAGAGAAAGCACCGGCTAACTCGT  
GCCAGCAGCCGCGGTAATACGAGTGGTGCAAGCGTTATTCGGAATAATTGGGCGTAAAGG  
GTGTGTAGACGGTATATTAAGTCAACTGTAAATTCTTCGGCCTAACCGGAGGCAAGCGG  
TAGAACTGATATGCTAGAGGGTGGGAGAGAGAAGTGGAATTCTCGGAGTAGCGGTAAAA  
TGCGTAGATCTCGAGAGGAACACCGATGGCGAAGGCAGCTTCTTAGTCCATTCTGACGT  
TGAGACACGAAAGCGTGGGGAGCAAACAGGATTAGATACCCCTGTAGTCC  
>Otu10537  
CCAGCCTACGGGGGGGCTGCAGTCGAGGATCTTTAGCAATGCCCCGAAAGGGTGACTATGCG  
ACGCCGCGTGAGGATGAAGGCCTTCGGGTGTAACTCCTGTTCAGGGGGGAAGAACTT  
TGCAGGTTAATAGCTTGCAAACTGACATCACCCCCAAAGGAAGCCACGGCTAACTCTGTG  
CCAGCAGCCGCGGTAAGACAGAGGTGGCAAGCGTTGTTTCGATTTCATTGGGTGTAAAGG  
CAGGTAGGCGGTTTTATAAGTCCGGCGTGAAATCCCAGAGCTCAACTCTGGAAGTGCCTT  
GGAACTATATGACTTGAGTATCGGAGAGGTGAGGGGAATTCTCGGTGTAAGGGTGAAAT  
CTGTAGATATCGAGAGGAACACCAGTGGCGAAGGCGCCTCACTGGCCGTTACTGACGCT  
GAGCTGCGAAAGCAAGGGGAGCAAACAGGATTAGAGACCCCCGTAGTCC  
>Otu10550  
CCAGCCTACGGGTCGCTCCAGCGACGAATCTTCCGCAATGGGCGCAAGCCTGACGGAGCG  
ACGCCGCGTGTGGGATGAAGCGCCTTCGGTGTGTAAACCACTGTCAGGGGATAGAACC  
TGATCATCCCCAAAGGAAGAGACGGCTAACCTGTGCCAGCAGCCGCGGTAAGACAGGGG  
TCTCGAGCGTTAATCGGAATTACTGGGCTTAAAGGGTGCGTAGGCCGGCCCGCAAGTGTC  
TTGTGAAATCCCCTGCTCAACCAGGGAACAGCTCGACATACTGCGGGTCTTGAGGAAGG  
TAGGGGTTGCCAGAAGTGTAGGTGGAGCGGTGAAATGCGTAGATATCTACAGGAATGCCG  
ATGGTGAAGACGGGCAACTGGGCCTTTCTCTGACGCTGAGGCACGAAAGCGTGGGGAGCAA  
ACAGGATTAGAGACCCCTCGTAGTCC  
>Otu10551  
CAGCCTATGGGGGGGCTGCAGTGGGGAATATTGGACAATGGGCGCAAGCCTGATCCAGCAA

TGCCGCATGTGTGAAGAAGGCCTTCGGGTTGTAAAGCACTTTAGGTTGGGAAGAAAAAT  
TCGGGCGAATATCCCCGAGTCTTGACGGTACCGACAGAATAAGCACCGGCTAACTCTGTGC  
CAGCAGCCGCGGTAATACAGAGGGTGCTAGCGTTAATCGGATTTACTGGGCGTAAAGCGT  
GCGTAGGCGGTTTGTAAAGTCGTTGTGAAAGCCCTGGGCTCAACCTGGGAATTGCAGTC  
GATACTGGCGGACTAGAGATCGGTAGAGGGGGGTGGAACCTCAGGTGTAGCGGTGAAATG  
CGTAGATATCTGGAAGAACACCGATGGCGAAGGCAGCCCCCTGGGCCTGATCTGACGCTG  
AGGCACGAAAGCGTGGGTAGCAAACAGGATTAGAAACCCCTCGTAGTCC

>Otu10554

CCAGCCTACGGGTGGCTGCAGTCGAGAATTTTTCTCAATGGGGGAAAGCCTGACCATGCG  
ACGCCGCGTGCTGGATGAAGTCCTTCGGGACGTAAACAGCTTTTACGCGTGAAGAAGTAA  
TTGACATTAGCGCGAGAATAAGGGGCTCCTAACTCTGTGCCAGCAGGAGCGGTAATACAG  
AGGCCCCGAGCATTACCCGGAATCACTGGGCGTAAAGGGTGTGTAGGCGGTGGTATTAGT  
CTTTCGTAAAAGCACTGGGGCTTAACCCCGGTAATGCGATAGAAACGGTACCGCTACGAG  
GATGCGAGAGGTAAAGGGAACTCATGGTGTAGGGGTGAAATCCGTTGATATCATGGGGAA  
CACCAAATGCGAAGGCACCTTTACTGGCGCACTCCTGACGCTGAAACACGAAAGCGTGGGA  
ATCGAACGGGATTAGATACCCCTAGTAGTCC

>Otu10556

CCAGCCTATGGGGTGCTGCAGCAACGAATATTCGCAATGGGCGAAAGCCTGACGGAGCG  
ACGCCGCGTGAAGGATGAAGTCCTTCGGGATGTAAACTTCATTAGTTTGTGAGAAAAGAA  
CCCGACCTAACACGTCGGGGAGTTGATCAGCAAACGAAAGGGACGGCTAACTCCGTGCCA  
GCAGCCGCGGTAAGACGGAGGTCCCGAGCGTTGTTTCGGAATTATTGGGCTTAAAGCGCGT  
GTAGGCGGAGCCGTAAGTACCTTGTGAAATCCCCGGACTCAATCCGGGAAGTGTCTCGGTA  
TACTGCGGTTCTCGAGGCAGGTAGAGGTCACTGGAACCTTAGGTGGAGCGGTGAAATGCG  
TAGATATCTAAGGGAACGCCTGTGGCGAAAGCGGGTGAAGTGGGCCTGTCTGACGCTGAG  
ACGCGAAAGCGTAGGGAGCAAACGGGATTAGATACCCGAGTAGTCC

>Otu10561

CCAGCCTATGGGAGCTCCAGTCGAGAATTTTTCTCAATGGGCGAAAGCCTGAAGGAGCAA  
CGCCGCGTGGAGGATGAAATCCCTTGGGATGTAAACTCCTTTCGATCGGGAAGATAATGA  
CGGTACCGGAAGAAGAAGCCCCGGCTAACTTCGTGCCAGCAGCCGCGGTAATACGAGGGG  
GGCGAGCGTTGTTTCGGAATTATTGGGCGTAAAGGGCGCGTAGGCGGTTTTACAAGTCTTG  
TGTGAAATCTTCGGGCTCAACTCGAAGTCTGCACGAGAACTGTAAGGCTAGAGTGTGGG  
AGGGGTGCGTGGAATTTCCGGTGTAGCGGTGAAATGCGTAGATATCGGAAGGAACACCTG  
TGCGGAAAGCGGCGCACTGGACCACAACCTGACGCTGAGGCGCGAAAGCTAGGGGAGCAAA  
CAGGATTAGAAACCCTTGTAGTCC

>Otu10566

CCAGCCTATGGGTGGCAGCAGTTGGGAATATTGCACAATGGGCGAAAGCCTGATGCAGCG  
ACGCCGCGTGGAGGATGAAGGTTTTTCGGATTGTAAACTCCTGTTAAGTGGGAAGAAAGAC  
GCGTACCTAATACGTACGTGGGATGACGGTACCACTAGAGAAAGCACCGGCAAACCTTCGT  
GCCAGCAGCCGCGGTAATACGAAGGGTGCGAGCGTTATTTCGGAATAACTGGGTGTAAAGA  
GCGTGGAGGCGGTTGATTAAAGTTAGTTGTTAAATCGCTCGGCTTAACCGGGCACATGCGA  
TTAAAACCTGATCAGCTAGAGTGCAGAGAGAGAAGGGTAGAATTCTCGGAGTAGCGGTAAAA  
TGCGTAGATCTCGAGAGGAATACCGGTTGCGAAGGCGGCCTTTTGGCTCGTTACTGACGC  
TGGAGCGCGAAAGCGTGGGGAGCAAACAGGATTAGATACCCTAGTAGTCC

>Otu10571

CCAGCCTACGGGCGCACCATTTGAGGAATTTTGGACAATGGGGGAAACCCTGATCCAGCG  
ATGTCGCGTGATGATGAAGGCCTTTTGGTTGTAAAGTACTTTCGTCGGTGAAGATAATG  
ACGGTAACCGAAAAAGAAGCTCCGGCTAACTTCGTGCCAGCAGCCGCGGTAAGACGAAGG  
GAGCGAGCGTTGCTCGGAATAATTGGGCGTAAAGGGTGCCTAGGTGGTTTTTTAAGTGAG  
ATGTTAAAGACCTGGACTCAATCTAGGGAATGCATTTTCACTGAAAACTTGAGTGTGG  
GAGAGGAAACAGGAATTCCTCATGTAGGGGTGAAATTCGTAGATATGAGGAGGAACACCA  
AAGGCGAAGGCAAGTTTCTGGAACACAACCTGACACTGAGGCACGAAAGCGTGGGGAGCAA  
ACAGGATTAGATACCCCGGTAGTCC

>Otu10574

CCGCCTACGGGATGCAGCAGTGGGGAATATTGGACAATGGGCGCAAGCCTGATCCAGCCA  
CGCCGCGTGAGTGATGAAGGCCTTCGGGTGCTAAAGCTCTGTGGGGAGGGACGAACCGCT  
GCACGTTTCATATCGTGCAGCATGACGGTACCTTCTTAGCAAGCACCGGCTAACTTCGTGC  
CAGCAGCCGCGGTAATACGAAGGGTGCAAACGTTGCTCGGAATTATTGGGCGTAAAGCGC  
ACGTAGGCGGCTTAGCAAGTCGGATGTGAAATCCCTCGGCTCAACCAAGGAAGTGCATCC

GAAACTGCTGAGCTTGAGTACTTAAGAGGATCGCGGAATTCCTGGTGTAGAGGTGAAATT  
CGTAGATATCGGGAGGAACACCACTGGCGAAGGCGGCGATCTGGGAAGATACTGACGCTG  
AGGTGCGAAAGCGTGGGGAGCAAACAGGATTAGAGACCCCTAGTAGTCC

>Otu10575

CCAGCCTACGGGTCGCTCCAGTCGAGAATTTTTCTCAATGGGGGAAACCCTGAAGGAGCG  
TCGCCGCGTGGAGGATGAAGGTCTTCGGATTGTAACTCCTGTCATTAGGGAACAATTGT  
CCGCGATTAACTGTCGCGGGCTTGATAGTACCTGAAGAGGAAGAGACGGCTAACTCTGTG  
CCAGCAGCCGCGGTAATACAGAGGTCTCAAGCGTTGTTTCGGATTTCATTGGGCGTAAAGGG  
TGCGTAGGCGGCGGGGCAAGTCAAGTGTGAAATCTCGGGGCTCAACCCCGAAACTGCACT  
TGATACTGCCTTGCTAGAGTGCTGGAGAGGAGATTGGAATTTACGGTGTAGCAGTGAAAT  
GCGTAGATATCGGAAGGAACATCAGTGGCGAAAGCGGCTTCCTGGTCCAGCACCGACGTT  
CAGGCACGAAAGCGTGGGGAGCAAACAGGATTAGATACCCCGTAGTCC

>Otu10578

CCAGCCTATGGGATGCTCCAGTGGGGAATATTGGACAATGGGCGCAAGCCTGAACGAGCG  
ACGCCGCGTGC GCGATGAAGGCCTTCGGGTTGTAAAGCGCGAAAGTGGGGACGAAAGCTG  
AAAGTTTTGACCGATCCACAGTAAGCTCGGGCTAAGTTTCGTGCCAGCAGCCGCGGTAAGA  
CGAACCGAGCGAACGTTGTCCGGAATCACTGGGCTTAAAGGGCGCGTAGGCGGGCATTCA  
AGTCTGCGGTGAAATACTCCAGCTTAACTGGAGAATGCCGTGGATACTGGGTGTCTCGA  
GGGAGGTAGGGGCGTGCGGAACCTATTGGTGGAGCGGTGAAATGCGTTGATATCGATAGGA  
ACTCCGGTGGCGAAGGCGGCACGCTGGACCTCTTCTGACGCTGAGGCGCGAAAGCCAGGG  
GAGCAAACGGGATTAGAAACCCCTCGTAGTCC

>Otu10584

CCAGCCTACGGGTCGCAGCAGTCGAGAATCTTTCGCAATGGGCGAAAGCCTGACGAAGCG  
ACGCCGTGTGAGCGATGAAGGCCTTAGGGTTGTAAAGCTCTTTCGCTTGTGAACAAGAGA  
GGTTAGCTAATATCTAGCCAATTTGAGGGTAGCAGGTAAAGAAGCACCGGCTAACTCTGT  
GCCAGCAGCTGCGGTAATACAGAGGGTGCAAGCATTAATCGGATTTATTGGGCGTAAAGA  
GCGCGTAGGCGGGTTTTTAAAGTCAGATGTGAAATCCCGGGGCTCAACCCCGGAACAGCAT  
TTGAAACTGAAAATCTTGAGGGTAGTCGGAGAAAATGGAATTCACGTGTAGCGGTGAAA  
TGCGTAGATATGTGGAAGAACACCGGTGGCGAAGGCGATTTTCTAGATTATTCCTGACGC  
TGAGGCGCGAAAGCAAGGGGATCAAACAGGATTAGAAACCCGAGTAGTCC

>Otu10589

CCAGCCTATGGGGCGCAGCAGTCGAGAATCTTTCGCAATGGGCGAAAGCCTGACGAAGCG  
ACGCCGTGTGTGCGATGAAGGCCTTCGGGTTGTAAAGCACTTTCGCTTGGGAACAAGAGA  
AGCTGGCTAACATCCAGCAGATTTGAGCGTACCAGGTAAAGAAGCACCGGCTAACTCCGT  
GCCAGCAGCTGCGGTAATACGAGGGTGCAAGCATTAATCGGATTTATTGGGCGTAAAGG  
GCGCGTAGGCGGGGATAAAAAGTCAGATGTGAAATCCCGGGGCTCAACCCCGGAACAGCAT  
TTGAAACTCTATCTCTAGAGGGTAGGAGGAGAAAACGGAATTCACAAGTAGCGGTGAAA  
TGCGTAGATATGTGGAAGAACACCGGTGGCGAAGGCGGTTTTCTATCTTATTCCTGACGC  
TGAGGCGCGAAAGCAAGGGGATCAAACAGGATTAGAGACCCGCGTAGTCC

>Otu10593

CCAGCCTACGGGTCGCAGCAGTCGAGAATCTTCCGCAATGGACGAAAGTCTGACGGAGCG  
ACGCCGCGTGAAGGATGAAGCGCTTCGGCGTGTAAGTCTTTTATAGGGGAGAAAGTTT  
ATTGATAGTACCCTACGAATAAGAGGCTACAACTCTGTGCCAGCAGTAGCGGTAATACA  
GAGGCCTCAAGCGTTATCCGGAATTACTGGGCGTAAAGGGTGTGTAGGTGGTCTAGTTAG  
TCTTGTGTTAAATCTTCGGCTTAACCGGGGGCATGCATAGGAAACGGCTAGACTTGAGG  
GTGCGAGAGGCGCATGGAACCTCATGGAGTAGGGGTGAAATCCGCTGATATCATGAGGAAC  
ACCAAAGCGAAGGCAGTGCATGGCGCATTTCTGACACTCAAACACGAAAGCGTGGGTA  
GCGAATGGGATTAGAAACCCCTCGTAGTCC

>Otu10597

CCAGCCTACGGGTGGCTGCAGTAAGGAATATTGGTCAATGGGCGAAAGCCTGAACCAGCC  
ATGCCGCGTGCAGGAAGACGGCCCTATGGGTTGTAACTGCTTTTATTCGGGAATAAATC  
TTCTTACGTGTAAGAAGCTGAATGTACTGAAAGAATAAGGATCGGCTAACTCCGTGCCAG  
CAGCCGCGGCAATACGGAGGATCCAAGCGTTATCCGGATTTATTGGGTTTAAAGGGTGCG  
TAGGCGGCCTATTAAGTCAGAGGTGAAATTTTGAGCTTAACTGTAACATTGCCTTTGAT  
ACTGATTGGCTTGAATTAAGTTGAGGTAGGCGGAATGTGACAAGTAGCGGTGAAATGCAT  
AGATATGTCACAGAACACCAATTGCGAAGGCAGCTTACTAAGGTTTTTATTGACGCTGAGG  
CACGAAAGCGTGGGGATCAAACAGGATTAGAGACCCCTGTAGTCC

>Otu10601

CCAGCCTATGGGGGGCACCAGTGGGGAATATTGGACAATGGGCGCAAGCCTGATCCAGCA  
ATGCCGCGTGTGTGAAGAAGGTCTTCGGATTGTAAAGCACTTTTGGCAGGGACGATGATG  
ACGGTACCTGCAGAATAAGCCCCGGCTAACTTCGTGCCAGCAGCCGCGGTAATACGAAGG  
GGGCTAGCGTTGCTCGGAATGACTGGGCGTAAAGGGCGCGTAGGCGGCTGTCACAGTCAG  
ATGTGAAATTCTGGGCTCAACCTGGGGACTGCATTTGATACGTGGCGGCTTGAGTGGAG  
AAGAGGGTTGTGGAATTTCCAGTGTAGCGGTGAAATGCGCAGATATCGGAAGGAACACCT  
GTGGCGAAAGCGGCTCACTGGACCATAACTGACGCTGATGCACGAAAGCTAGGGGAGCAA  
ACAGGATTAGATACCCCCGTAGTCC

>Otu10602

CCAGCCTACGGGAGGCAGCAGTGGGGAATCTTGGACAATGGGGGAAACCCTGATCCAGCC  
ATGCCGCGTGAGTGATGAAGGCCCTAGGGTTGTAAACTCTTTCGCGCACGACGATAATG  
ACGGTAGTGCGAGAAGAAGCTCCGGCTAACTTCGTGCCAGCAGCCGCGGTAATACGAAGG  
GGGCTAGCGTTGTTTCGAATTACTGGGCGTAAAGCGCGCGCAGGCGGTCCTTCCAGTCAG  
AGGTGAAAGCCCAGAGCTCAACTCTGGAAGTGCCTTTGAAACTAGAGGACTTGGGTACGG  
GAGAGGTGAGTGGAATTTCCAGTGTAGAGGTGAAATTCGTAGATATTCGGAAGAACACCA  
GTGGCGAAGGCGGCTCACTGGCCCGTTACCGACGCTCAGGCGCGACGGCGTGGGGAGCAA  
ACAGGATTAGATACCCCCGTAGTCC

>Otu10605

CCAGCCTACGGGACGCTGCAGTGGGGAATTTTTCGCAATGGGGGAAACCCTGACGCAGCA  
ACGCCGCGTGAGGATGAAGTCCTTCGGGACGTAAACTCCTTTCGATCGGGACGATGATG  
ACGGTACCACCAGAAGAAGCCCCGGCTAACTTCGTGCCAGCAGCCGCGGTAATACGAAGG  
GGGCTAGCGTTGTTTCGAATTACTGGGCGTAAAGCGCACGCAGGCGGCTCGTTAAATTAG  
AAGTGAAAGCCCTGGGCTCAACCCGGGAATTGCTTTTAAGACTGGCGAGCTAGAATTCGG  
AAGAGGGCAGTGGAATTTCCAAGTGTAGAGGTGAAATTCGTAGATATTTGGAAGAACACCA  
GTGGCGAAGGCGACTGCCTGGTCCGATATTGACGCTCATGTGCGAAAGCGTGGGGAGCAA  
ACAGGATTAGAAACCCGTGTAGTCC

>Otu10608

CCAGCCTATGGGGGGCAGCAGTAGGGAATTTTCCACAATGGGCGAAAGCCTGATGGAGCA  
ACGCCGCGTGCAAGGATGAAGGCTTTCGGGTCGTAAACTGCTTTTATCTGTGATAATTATG  
ACAGTAACAGAAGAATAAGGGTCTGCTAACTACGTGCCAGCAGCCGCGGTCATACGTAGG  
ACCCAAGCGTTATCCGGAATTACTGGGCGTAAGGAGTTGCGTAGGTGGCAAAGTAAGCAA  
ATAGTGA AACGTATGGCTCAACGATATACACATTGTTTGAAGTGCCTTAGCTAGAGCACA  
AGAGAGGTAGCTGGAATTTCTAGTGAAGGAGTGAATCCGTAGATATTAGAAGGAACACC  
GATGGCGTAAGCAGGCTACTGGCTTGTTGCTGACACTCAGGCACGAAAGCGTGGGGAGCG  
AACGGGATTAGAAACCCCTAGTAGTCC

>Otu10617

CCAGCCTATGGGTCGCTCCAGTGGGGAATTTTGGACAATGGGGGCAACCCTGATCCAGCG  
ACGCCGCGTGAGGATGACGGTCTTCGGATTGTAAACTTCTTTTGGAGGGGATGAATGCC  
TGAGTGAATAACTCAGGGTGACAGTACTCTCTGAATAAGCCACGGCTAACTACGTGCCAG  
CAGCCGCGGTAATACGTAGGTGGCAAGCGATACTCGGAATCACTAGGCGTAAAGCGCAGG  
TAGGTGGTTTCGGTAAGTCTTTTGTGAAAGCTCCTGGCTCAACTGGGAGAGGTCAAGGGAA  
ACTGCCGGAAGTAGAGTTTGGTAGGGGATACTGGAAATCCTGGCGCAGCGGTGAAATGCGT  
AGATATCAGGAGGAATACCTATGGCGAAAGCAGGTATCTGGGCCACAAGTACACTGAGC  
TGCGAAAGCTAGGGGAGCAAACAGGATTAGATACCCTCGTAGCC

>Otu10620

CCAGCCTACGGGTGGCTCCAGTAGGGAATTTTCCACAATGGGCGAAAGCCTGATGGGGCA  
ACGCCGCGTGCAAGGATGAAGGCCTTCGGGTTGTAAACTGCTTTTCTTTGTGAGGACTATG  
ACAGTAGCAGAGGAATAAGGATCGGCTAACTCCGTGCCAGCAGCCGCGGTCATACGGAGG  
ATCCAAGCGTTATCCGGAATCACTGGGCGTAAAGAGTTGCGTAGGCGGCAGAGTTAACAG  
AGTGTGTAATAGTATGGCTCAACCATATAAACATGCTCTGCATTGCTCAGCTAGAGGGCG  
AAAGAGGTAGCTGGAATTCCTAGTGTAGGAGTGAATCCGTAGATATTAGGAGGAACACC  
GATGGCGTAGGCAGGCTACTGGTTCGACCCCTGACGCTAAGGCACGAAAGCGTGGGGAGCG  
ACCGGGATTAGAAACCCGCGTAGTCC

>Otu10622

CCAGCCTATGGGAGGCACCAGTCGAGAATCTTCCACAATGGACGAAAGTCTGATGGAGCG  
ACGCCGCGTGAGTTGATGAAGTCCTTCGGGACGTAAAAACCTTTTATGAGGGAGGAAGTAA  
TTGACGTTACCTCATGAATAAGGGGCTCCTAACTCTGTGCCAGCAGGAGCGGTAATACAG  
AGGCCCCAAGCATTATCCGGAATCACTGGGCGTAAAGGGTGTGTAGGCGGTTGTATTAGT



CTTTTGTAAAGTTCTGGGGCTTACCCTCGGAAATGCAAGAGAAACGGTACAACCTACGAG  
GATGCGAGAGGTATATGGAATCATGGTGTAGGGGTGAAATCCGTTGATATCATGGGGAA  
CACCAAATGCGAAGGCAATATACTGGCGCACTCCTGACGCTGAAACACGAAAGCGTGGGA  
ATCGAACGGGATTAGATACCCCTAGTAGTCC

>Otu10627

CCAGCCTATGGGGCGCAGCAGTCGAGAATCATTCGCAATGGGCGAAAGCCTGACGATGCG  
ACGCCGTGTGTGCGATGAAGGCCTTCGGGTGTAAAGCACTTTCGCCTGGGAACAAGAGA  
AGCCGGCTAATATCCGGCAGATTTGAGGGTACCAGGTAAAGAAGCACCGGCTAACTACGT  
GCCAGCAGCTGCGGTAATACGTAGGGTGCAGCATTAAATCGGATTTATTGGGCGTAAAGG  
GCGCGTAGGCGGGAATGTAAGTCGGTCGTGAAATCCCGGGGCTCAACCCCGGAACAGCGT  
TCGAAACTACATTTCTGGAGGGTAGGCGGAGAAAATGGAATTCACATGTAGCGGTGAAA  
TGCGTAGATATGTGGAAGAACACCGGTGGCGAAGGCGGTTTTCTAGCTTATACCTGACGC  
TGAGGCGCGAAAGCAAGGGGATCAAACAGGATTAGAAACCCAGTAGTCC

>Otu10631

CCAGCCTACGGGGTGCACCAGTGGGAATCTTGACAATGGGGGAAACCCTGATGGAGCG  
ACGCCGCGTGGGGGATGACTGGCTTCGGCCCGTAAACCCCTGTCATTTGCGAACAAATTG  
ATTACCTAACACGTGAAGCATTGATAGTAGCGGAAGAGGAAGGGACGGCTAACTCTGTG  
CCAGCAGCCGCGGTAATACAGAGGTCCCAAGCGTTGTTTCGGATTCACTGGGCGTAAAGGG  
TGCGTAGGTGGCCGGGTAAGTCTGATGTGAAATCTCGCAGCTTAACTGCGAAACTGCATT  
GGATACTATCCGACTAGAGGAATGGAGGGGAGACTGGAATACTTGGTGTAGCAGTGAAAT  
GCGTAGATATCAAGTGGAACACCAGTGGCGAAGGCGAGTCTCTGGACATTTCCCTGACGCT  
GAGGCACGAAAGCCAGGGGAGCAAACGGGATTAGAGACCCGAGTAGTCC

>Otu10632

CCAGCCTATGGGAGGCTGCAGTCGAGGATCTTCGGCAATGGACGCAAGTCTGACCGAGCG  
ACGCCGCGTGGATGATGAAGGCCTTCGGGTGTAAATCCTGTGCGAGGGGGACGAAGCCG  
CAAGGTTGACCGATCCCTGGAGGAAGGGCGGGCTAAGTTCGTGCCAGCAGCCGCGGTAAA  
ACGAACTGCCCCAACGTTGTTTCGGAATCACTGGGCTTAAAGGGCGCGTAGGCGGCGAATC  
AAGTCAGGGGTGAAATCCGGCAGCTTAACTGTGCAAGTGCCTTTGATACTGGTTTTGCTCG  
AGGAAGGTAGGGGTGTGTGGAACCTTCTGGTGGAGCGGTGAAATGCGTTGATATCAGAAGG  
AACGCCGCTGGCGAAAGCGACGCACTGGACCTTTTCCTGACGCTGAGGCGCGAAAGCTAGG  
GGAGCAAACGGGATTAGATACCCCTAGTAGTCC

>Otu10633

CCAGCCTACGGGTCGCTGCAGCCGAGAATATTCGACAATGGGCGAAAGCCTGATCGAGCG  
ACGCCGCGTGTGATGAAGTGCTTCGGTACGTAAACAGCTTTTATTGGGGACGAAGTAA  
TTGACGGTACCCAATGAATAAGGGGCTCCTAACTCTGTGCCAGCAGGAGCGGTAATACAG  
AGGCCCCGAGCATTATCCGGAATCACTGGGCGTAAAGGGTGTCCAGGTGGTCGTATTAGT  
CGTTCGTAAAATCCGCAAGCTCAACTTGCGGCCCGCGAGCGAAACGGTACGACTAGAGGG  
CGCGAGAGGTGCACGGAACCATGGTGGAGGGGTGAAATCCGTTGATATCATGGGGAAACA  
CCAAAGGCGAAGGCAGTGCCTGGCGCGTTCCTGACACTCACACACGAAAGCCAGGGGAG  
CGAACGGGATTAGAGACCCGAGTAGTCC

>Otu10634

CCAGCCTATGGGGTGCACCAGTCGAGAATTTTTCTCAATGGGCGGAAGCCTGAAGGAGCG  
ACGCCGCGTGGGGGATGAATGGCTTCGGCCCGTAAACCCCTGTCATTTGCGAACAAATTG  
CTTACCCAACACGTGTGTCAATTGATTGTAGCGGAAGAGGAAGGGACGGCTAACTCTGTG  
CCAGCAGCCGCGGTAATACAGAGGTCCCAAGCGTTGTTTCGGAATCACTGGGCGTAAAGGG  
TGCGTAGGCGGTTGGGTAAGTCTGACGTGAAATCTCTGGGCTTAACTCAGAGGCTGCTGC  
CGAAACTGCTGTGCTAGAGTGCAGAGAGGCGAGTGAATTCGGGTGTAGCGGTGAAAT  
GCGTAGATATCCGAGGAACATCCGAGGCGAAAGCGGCTCGCTGGATCGCAACTGACGCT  
GAGGGACGAAAGCTAGGGGAGCAAACAGGATTAGATACCCCTGGTAGTCC

>Otu10638

CCAGCCTATGGGGTGCAGCAGTCGAGAATATTTGGCAATGGGCGAAAGCCTGACCATGCG  
ACGCCGCGTGTGACGAAGTCCTTCGGGACGTAAACAGCTTTTATGGAGGAAGAAGTAA  
TTGACATTACTCCATGAATAAGGGGCTCCTAACTCTGTGCCAGCAGGAGCGGTAATACAG  
AGGCCCCGAGCATTATCCGGAATCACTGGGCGTAAAGGGTGTGTAGGCGGTCTGTGTAGT  
CCTTTGTAAAAGGTCTTCGGCTTAACCGAGGAACTGCAGGGGAAACGGCACGACTTCGAG  
GACGCGAGAGGTATGGGGAACTCATGGTGTAGGGGTGAAATCCGTTGATATCATGGGGAA  
CACCAAATGCGAAGGCACCTTTACTGGTACGCTCCTGACGCTGAAACACGAAAGCGTGGGA  
ATCGAACGGGATTAGATACCCCGGTAGTCC

>Otu10659

CCAGCCTACGGGATGCAGCAGCCGAGAATCATTCGCAATGGGCGAAAGCCTGACGATGCG  
ACGCCGTGTGAGCGATGAAGGCCTTAGGGTTGTAAAGCTCTTTTCGCTTGGAACAAGAGA  
GGTCAGCTAACATCTGACTAATTTGAGGGTACCAGGTAAAGAAGCACCGGCTAACTCCGT  
GCCAGCAGCTGCGGTAATACGGAGGGTGCAAGCATTAATCGGATTTATTGGGCGTAAAGG  
GCGCGTAGGCGGAGTGAAAAGTCAGATGTGAAATCCCGGGGCTCAACCTCGGAACAGCAT  
TTGAAACTCTCACCTAGAGGGTAGGCGGAGAAAACGGAATTCACAAGTAGCGGTGAAA  
TGCGTAGATATGTGGAAGAACACCGGTGGCGAAGGCGGTTTTCTAGCTTATTCCTGACGC  
TGAGGCGCGAGAGCAAGGGGATCAAACAGGATTAGAAACCCCTGTAGTCC

>Otu10664

CCAGCCTACGGGTCGCTCCAGGTCCATGTATCCGATGACGTTTCGGTCTCGCTTGTTGTGC  
GGTGGAATGATCCATGCAGGTTGCTCGCGTTATGACCTGGATCGCTTTGGGGTCGTGTT  
TCGCGCGTCGCCGCGTCAATCCGATGTATGATTGTTGCCGGTACTCTGTGCAACAAGAT  
GGCGCCGGCCTTGCGCAAGGTGTACGACCAGATGGCCGAGCCGCGCTGGGTGATCTCGAT  
GGGGTCGTGTGCCAACGGTGGCGGCTATTACCATTATTCGTATTCCGTCGTGCGCGGCTG  
TGATCGCATCGTACCGGTTGATGTCTATGTTCCGGGTTGTCCTCCGACTGCTGAGGCATT  
GTTGTACGGCATCATGCAATTGCAAAACAAGATCAAGCGCACCAATACCATCGCGCGCTA  
AGCGGCAAGCGCACACTATGACGACGAAATTAGAGACCCCCGTAGTCC

>Otu10668

CCAGCCTACGGGAGGCAGCAGTGGGGAATATTGGACAATGGGGGCAACCCTGATCCAGCC  
ATGCCGCGTGAATGATGAAGGCCTTCTGGGTTGTAACTGCTTTTGCTGGGGATAAAAG  
ACCCTTGCGAGGGAAATTGAAGGTACCGGGTGAATAAGCCACGGCTAACTACGTGCCAGC  
AGCCGCGGTAATACGTAGGTGGCAAGCGTTGTCCGATTTATTGGGTTTAAAGGTTGCGT  
AGGCGGTTCAATTAAGTCAGTTGTGAAATACGTCAGCTTAACTGACGAGGTGCAATTGATA  
CTGGAGAACTTGAGTACAGACGAGGTAGGCGGAATTGACGGTGTAGCGGTGAGATGCATA  
GATATCGTCAAGAACACCGATAGCGAAGGCAGCTTACTAGACTGTAAGTACGCTGATGC  
ACGAAAGTGTGGGGATCAAACAGGATTAGAAACCCCCGTAGTCC

>Otu10669

CCCAGCCTACGGGAGGCACCAGTGGGGAATCTTGACAAATGGGCGAAAGCCTGATGCAGC  
GACGCCGCGTGAGGGAAGAAGGCCTTCGGGTTGTAAACCTCTTTTCAGGAGGGACGAAGCC  
ACTCGGGTTAATAGCCCAGAGGGTGACGGTACCTCCAGAAGAAGCCCCGGCTAACTACGT  
GCCAGCAGCCGCGTAATACGTAGGGGGCAAGCGTTGTCCGACTTATTGGGCGTAAAGA  
GCGTGTAGGCGGCCATACAGGTCAGCTGTGAAAACGAGGCTCAACCTCGAGACGTCGG  
TTGAAACCGTACGACTAGAGTCCGGAAGAGGAGAGTGGAATTCCTGGTGTAGCGGTGAAA  
TGCGCAGATATCGGGAAGAACACCTATGGCGAAGGCAGCTCTCTGGGACGGTACTGACGC  
TGAGACGCGAAAGCGTGGGGAGCGAACAGGATTAGATAACCCTAGTAGTCC

>Otu10672

CCAGCCTATGGGTGGCACCAGTGGAGAATATTGGTCAATGAACGAAAGTTTGAAGTAGTG  
GATTGCGGAAATGAAAGATTCATCGAATCGTGAAGGCTATGACAGTTGTAAAGTTTGTGC  
GCAGATTAAAATCTTGTTTTTACATCTGAAGAGAACCCCCGGGCCAACAACTGCCAGCAG  
CTGCGGTAAGACGTTGACGGGGAAGCGTTACTGGTCATTACTAGACGTAAAGAGTGGCTA  
GATTGTTTTAAGTTTTTTTTGTTGAAAATCAAAGAATTGACAAAGACAAACAAAAACCTTA  
ATACTTGAGGAATAAGGAGATTTGTGATAAGTTTAACTAGAGATAGAATTCTAAAAGAT  
TAAAAGGATCTTCAAATGTCACGACAGCAATTTACTTATTATCCTGACATCAAACCATTA  
AAGTATAGGTATCAATCAGGATTAGAAACCCCTGGTAGTCC

>Otu10673

CCAGCCTATGGGTGCGCAGCAGTGGGGAATATTGGACAATGGGGGCAACCCTGATCCAGCA  
ATGCCGCGTGTGTGAAGAAGGCCTGAGGTTGTAAAGCACTTTCAGTAGGGAGGAGGACG  
TAAAGGTTAAGAGCTATTATGTTGGACGTTACCTACAGAAGAAGCACCGGCTAACTCCGT  
GCCAGCAGCCGCGTAATACGGAGGGTGCGAGCGTTAATCGGAATTACTGGGCGTAAAGG  
GTGTGTAGGTGGTTTGATAAGTTATCTGTGAAAGTCCTGGGCTTAACCTGGGAAGGTCAG  
ATAAGACTGTTAGACTTGAGTATAGGAGAGGGTAGTGGAATTTCCGGTGTAGCGGTGAAA  
TGCGTAGAGATCGGAAGGAACACAGTGGCGAAGGCGGCTACCTGGCCTAATACTGACAC  
TGAGGCACGAAAGCGTGGGGAGCAAACAGGATTAGAAACCCCGGTAGTCC

>Otu10684

CCAGCCTACGGGTGGCTCCAGTGGGGAATATTGCGCAATGGGCGAAAGCCTGACGCAGCG  
ACGCCGCGTGAGAGACGAAGGCCTTAGGGTCGTAAGCTCCTGTCAGATGGAAAGAAAAGC  
TTGCTCTCTAGTAAAGACAAGTATGACGGTACCATCAGAGGAAGCACCGGCTAACTTCGT

GCCAGCAGCCGCGGTAATACGAAGGGTGCAGCGTTATTTCGAAATTACTGGGCGTAAAGG  
GTGCGTAGACGGTGTGTTAAGTTTGTGTTAAAGACTCCGGCCTAACTGGAGGGTTGCAA  
TGAAAACCTGGCATGCTAGAGGGTGAGAGAGAGAAGTGGAATTCCTGGAGTAGCGGTAAAA  
TGCGTGGATCTCGGGAGGAACACCAATGGCGAAGGCAGCTTCTTGGCTCATTCTGACGT  
TGAGGCACGAAAGCGTGGGGAGCAAACAGGATTAGAAACCCAGTAGTCC

>Otu10687

CCAGCCCGGGGCGCTGCAGTCGAGAATATTCGACAATGGGCGAAAGCCTGATCGAGCGAC  
ACCGCGTGCAGGATGAAGGCCCTCGGGTCGTAAACTGCGGTAGTATGATAAGAATGCAAA  
TGAATGTCATACGGAAGAGGTGGGTAACCTACGTGCCAGCACCAGCGGTAATACGTAGAC  
CTCAAGCGTTATTCGGATTTATTGGGCGTAAAGCGCACGTAGGAGGTTTTGCGCGTCTTT  
TGTTAAAGCCCGGGGCTAACCCCGGAAGTGCGGGAGATACGGCAGAACTAAAGGAGGTT  
AGAGGTGCATGGAACCTACGGTGTAGGGGTGAAATCCGTTGATATCGTGCGGAATACCAA  
AGGCGAAGGCATTGCACTGGGACCTTCCTGACACTGAGACGCGAAAGCGTGGGGAGCAAA  
AAGGATTAGATACCCTAGTAGTCC

>Otu10688

CCAGCCTACGGGGCGCTCCAGTGGGGAATATTGGACAATGGGCGGGAGCCTGATCCAGCC  
ATGCCGCGTGCAGGAAGAAGGCCTTCTGGGTGTAAACTACTTTTGCCAGGGGATAAAAG  
ACCCGTGCGCGGGGAATTGAAGGTACCTGGTGAATAAGCCACGGCTAACTACGTGCCAGC  
AGCCGCGGTAATACGTAGGTGGCAAGCGTTGTCCGGATTTATTGGGTTTAAAGGGTGTGT  
AGGCGGGCATGTAAGTCAGTGGTGAATCTCCGGGCTCAACCCGGAACCTGCCATTGATA  
CTATATGCCTTGAATTCTGTTGAGGTTGGCGGAATAAGTCATGTAGCGGTGAAATGCATA  
GATATGACTTAGAACACCGATTGCGAAGGCAGCTAACTAAGCAGATATTGACGCTGAGGC  
ACGAAAGCGTGGGGATCAAACAGGATTAGAGACCCGAGTAGTCC

>Otu10691

CCAGCCTACGGGTGGCAGCAGACGAGAATATTCGCAATGGACGAAAGTCTGACGGAGCG  
ACATCGCGTGATGGATGAAGTGCTTAGGTACGTAAACATCTTTTATCGGGGACGAAGTAA  
TTGACGTTACTCCATGAATAAGGGGCTCCTAACTCTGTGCCAGCAGGAGCGGTAATACAG  
AGGCCCCGAGCATTACCCGGAATCATTGGGCGTAAAGAGTGCGTAGGTGGTCATGTTAGT  
CGGGCGTTAAACCCCGGGGCTCAACCCCGGAATCGCACCCGAAACGGCATGACTCGAGGG  
CGTGAGAGGTACATGGAACCTCATGGTGTAGGGGTGAAATCCGTTGATATCATGGGGAAAC  
CCGAAAGCGAAGGCAATGTACTGGCGCGTTCTTGACACTCAAGCACGAAAGCGTGGGTAG  
CGAACGGGATTAGATACCCGCGTAGTCC

>Otu10707

CCAGCCTATGGGAGGCAGCAGTCGAGAATTTCTTCACAATGGGCGAAAGCCTGATGGAGCG  
ACGCCGCGTGGGGGATGAATGGCTTCGGCCCGTAAACCCCTGTCATTTGCGAACAAACCT  
CGCCATTTAACAGACGGCGAGCTGATTGTAGCGAAAGAGGAAGGGACGGCTAACTCTGTG  
CCAGCAGCCGCGGTAATACAGAGGTCCCAAGCGTTGTTTCGGATTCACTGGGCGTAAAGGG  
TGCGTAGGCGGTGGGTAAGTCTGACGTGAAATCTCGCGGCTTAACCGCGAAAAGGCGTC  
GGATACTATCCGGCTTGAGGAGTGAGGGGAGACTGGAATTTCTCGGTGTAGCAGTGAAAT  
GCGTAGATATCGAGAGGAACACCAGTGGCGAAGGCGAGTCTCTGGACACTTCCTGACGCT  
GAGGCACGAAAGCCAGGGGAGCAAACGGGATTAGAAACCCCTGTAGTCC

>Otu10730

CCAGCCTATGGGATGCTGCAGCAGGGAATCGTACGCAATGGACGAAAGTCTGACGTCGCA  
ATGCCGCGTGGAGGATGAAGGCCTTCGGGTCGTAAACTCCTTTTACGGTAATAGAGATAT  
TATCGAGAATAAGCACCTGCTAACTCTGTGCCAGCAGCCGCGGTAATACAGAGGGTGCAA  
GCGTTATCCGGATTTATTGGGCGTAAAGCGTTTCGTAGGTGACACGGCAAGTTATTTTTC  
AAATACCACGGCTTAACCGGGGAAGGGAGATAATACTACCGAGTTTGACTTCTGGTGGG  
CATCTGGAACCTGATGGTGTAGTAGTGAAATACGTTGATATCATCAGGAACCTCAAGGGCG  
AAGGCAGGATGCTAACCAGTTAGTGACACTGAGGAACGACAGCTAGGGGAGCGAAAGGGA  
TTAGAAACCCTAGTAGTCC

>Otu10739

CCAGCCTATGGGAGGCTCCAGTCGAGAATTTTCTCAATGGGCGAAAGCCTGAAGGAGCG  
ACGCCGCGTGGGGGATGAATGGCTTCGGCCCGTAAACCCCTGTCATTTGTGAACAAATTG  
CTTCACCCAACACGTGAAGCATTGATTGTAACGGAAGAGGAAGGGACGGCTAACTCTGTG  
CCAGCAGTCGCGGTAATACGTAGGCAGCAAGCGTTGTTTCGGAGTTACTGGGCGTAAAGGG  
TGCGTAGGCGGCTTTTTAAAGTTTGGTGTGAAATCTCCCGGCTCAACTGGGAGGGTGCGCC  
GAATACTGAGAGGCTAGAGTGTGGGAGAGGAAAGTGGAATTCCTGGTGTAGCGGTGAAAT  
GCGTAGATATCAGGAGGAACACCGGTGGTGTAAACGGCTTTCTGGACCATAACTGACGCT

GAGGCACGAAAGCGTGGGTAGCAAACAGGATTAGATACCCGTGTAGTCC

>Otu10744

CCAGCCTATGGGTTCGAGCAGTGGGGAATATTGGACAATGGGCGAAAGCCTGATCCAGCA  
ATACCGCGTGTGTGAAGAAGGCCCTCGGGTTGTAAAGCACTTTCAGTAGGGAGGAAAGAA  
TTAGGCTAATACCCCTGAGAGAAGACGTTACCTACAGAAGAAGCACCGGCTAACTCTGTG  
CCAGCAGCCGCGGTAATACAGAGGGTGCAGCGTTAATCGGAATTACTGGGCGTAAAGCG  
CTCGTAGGCGGGTGTTTAAGTCGATCGTGAAAGCCCTGGGCTTAACCTGGGAATGGCGGT  
CGATACTGGGCACCTAGAGTATGGTAGAGGATAGTGGAATTCCTGGTGTAGCAGTGAAAT  
GCGTAGATATCGGGAGGAACACCAGTGGCGAAGGCGACTATCTGGACCAATACTGACGCT  
GAGGAGCGAAAGCGTGGGGAGCAAACAGGATTAGAAACCCGTGTAGTCC

>Otu10749

CCAGCCTACGGGAGGCTCCAGCTAAGAATATTCCGCAATGGACGAAAGTCTGATGGAGCG  
ACGCCGCGTGGGGGATGAATGGCTTCGGCCCGTAAACCCCTGTCATTTGCGATCAACCGT  
TATTGTTTTAAGAGATGATAACCTGATAGTAGCGAAAGAGGAAGGGACGGCTAACTCTGTG  
CCAGCAGCCGCGGTAATACAGAGGTCCCAAGCGTTGTTTCGGATTCACTGGGCGTAAAGGG  
TGCGTAGGTGGCGAAGTAAGTCGGATGTGAAATCTCCGAGCTCAACTCGGAAACTGCATT  
GGAAACTACTTTGCTCGAGGATTGGAGGGGGGACTGGAATACTTGGTGTAGCAGTGAAAT  
GCGTAGATATCAAGTGGAAACACCAGTGGCGAAGGCGAGTCCCTGGACAATTCCTGACACT  
GAGGCACGAAAGCTAGGGGAGCAAACAGGATTAGAGACCCCAGTAGTCC

>Otu10766

CCAGCCTATGGGAGGCTGCAGCCGAGAATATTTCGACAATGGGCGAAAGCCTGATCGAGCG  
ATACCGCGTGGTGGATGAAGTGCTTCGGCACGTAAATACCTCTTATGGAGGAGGAAGTTA  
TTGACGTTACTTCATGAATAAGGGGCTCCTAACTCTGTGCCAGCAGGAGCGGTAATACAG  
AGGCCCCGAGCATTACCCGGAATTATTGGGCGTAAAGAGTGCGTAGGTGGTCATATTAGT  
CGGTCGTTAAACCCGGGGCTCAACCCCGGAGGTGCGACCGAAACGGTATGACTCGAGGG  
CGTGAGAGGTACATGGAACCATGGTGTAGGGGTGAAATCCGTTGATATCATGGGGAAACA  
CCGAAAGCGAAGGCAATGTACTGGCGCGTTTCTGACACTCAAGCACGAAAGCGTGGGTAG  
CGAACGGGATTAGATACCCCGGTAGTCC

>Otu10810

CCAGCCTACGGGGGGCACCAGTGGGGAATATTGGACAATGGGCGAAAGCCTGATCCAGCA  
ATGCCGCGTGTGTGAAGAAGGCCTTCGGGTGTAAAGCACTTTAGTGGGGGAAGAAAGCT  
ACGCAAGTAGTTTGACGGTACCCCAAGAATAAGCAACGGCTAACTCTGTGCCAGCAGCCG  
CGGTAATACAGAGGTTGCGAGCGTTAATCGGAATGACTGGGCGTAAAGGGCGCGTAGGTG  
GATGTGTGTGTTGGATGTGAAAGCCCCGGGCTTAACCTGGGAATTGCATACAAAACCTGCA  
CATCTAGAGTAGAGCAGAGGTAAGTGAATTTCCGGAGTAGCGGTGAAATGCGTAGATAC  
CGGAAGGAACACCAGTGGCGAAGGCGACTTACTGGGCTCAAACCTGACACTGAGGCGCGAA  
AGCGTGGGGAGCAAACAGGATTAGAAACCCCGTAGTCC

>Otu10839

CCAGCCTACGGGGGGCAGCAGCCGAGAATATTTCGACAATGGGCGAAAGCCTGATCGAGCG  
ATACCGCGTGGTGGATGAAGCGCTTCGGCGCGTAAACATCTTTTATGGAGGAGGAAGTTA  
TTGACGTTACTCCATGAATAAGGGGCTCCTAACTCTGTGCCAGCAGGAGCGGTAATACAG  
AGGCCCCGAGCGTTACCCGGAATTACTGGGCGTAAAGAGTGCGTAGGTGGTCGTGTTAGT  
CGCGCGTCAAAAACCCGAGCTCAACTCCGGATCCGCGCGCGAAACGGCACGACTCGAGGG  
CGTGAGAGGTGCATAGAACTCTAGGTGTAGGGGTGAAATCCGTTGATATCTAGGGGAATA  
CCGAAAGCGAAGGCAGTGCACCTGGCGCGTTCTTGACACTCAAGCACGAAAGCGTGGGGAG  
CAAAAAGGATTAGATACCCCTGTAGTCC

>Otu10849

CCAGCCTATGGGTGGCTCCAGTCGAGGATCTTTCGCAATGGGCGCAAGCCTGACGAAGCG  
ACGCTGCGTGAACGATGAAGGCCTTCGGGTGCTAAAGTTCTTTCGCGCAAGAACAAGGAA  
ATGATGTGAATAACATCGTAACCTTGAGGGTACTGCGTAAAGAAGCACCGGCTAACTCCGT  
GCCAGCAGCTGCGGTAATACGGAGAGTGCAAGCATTAATCGGAATTATTGGGCGTAAAGG  
GCGCGTAGGCGGAAGTGTAAAGTCAGATGTGAAATTCGGAAGCTCAACTTCGGAGCTGCAT  
TTGAAACTACACATCTAGAGGGTTGACGGAGAAAACGGAATTCACGCTGTAGCGGTGAAA  
TGCGTAGATATGTGGAAGAACACCGGTGGCGAAAGCGGTTTCTGGGCTGAGACTGACGC  
TGAGGCGCGAAAGCAAGGGGAGCAAACAGGATTAGAAACCCGAGTAGTCC

>Otu10857

CCAGCCTACGGGTGGCTCCAGTGGGGAATTTTGGACAATGGGGGAAACCCCTGATCCAGCA  
ATGCCGCGTGTGTGAAGAAGGCCTTCGGGTGTAAAGCACTTTTGTCCGAAAGAAATCC

TGTGGGCTAATACCCTGTGGGGATGACGGTACCGGAAGAATAAGCACCGGCTAACTACGT  
GCCAGCAGCCGCGGTAATACGTAGGGTGCAAGCGTTAATCGGAATTACTGGGCGTAAAGC  
GTGCGCAGGCGGTTTCGCTAAGACAGATGTGAAATCCCCGGGCTTAACCTGGGAAGTGCAT  
TTGAGACTGCATGGCTAGAGTATCGAAGAGGGAAGTGAATTTCCGGTGTAGCGGTGAAA  
TGCGTAGATATCGGAAGGAACACCAGTGGCGAAAGCGACTTCCTGGTCAATACTGACGT  
TCATGTGCGAAGGCGTGGGGAGCAAACAGGATTAGAAACCCAGTAGTCC

>Otu10860

CCAGCCTACGGGGGGCTGCAGTCGAGAATATTCGACAATGGACGAAAGTCTGATCGAGCG  
ACACCGCGTGTAGGATGAAGGCCCTCGGGTCGTAAACTACGGTAGTATGATAAGAATGCA  
AATGACTGTCATACGGAAAGAGGTGGGTAACCTACGTGCCAGCACCAGCGGTAATACGTAG  
ACCTCAAGCGTTATCCGGATTTATTGGGCGTAAAGAGCATGTAGGAGGTTTCGCGCGTCT  
TTTGTAAAGCCCAGGGCCTAACCTGGAAGTGCAGGAGATACGGCGGAACTAGAGGAGG  
TTAGAGGTGCATGGAAGTCAATGGTGTAGGGGTGAAATCCGTTGATATCATGGGGAACACC  
AAATGCGAAGGCAGTACACTGGCGCATATTTGACACTGAAGCACGAAAGCGTGGGTAGCG  
AATGGGATTAGATACCCGCTAGTCC

>Otu10862

CCAGCCTACGGGAGGCTGCAGTCGAGGATCTTCGGCAATGGGCGAAAGCCTGACCGAGCG  
ACGCCGCGTGCAGCATGAAGGCCCTTCGGGTGTAAAGCGCTGTGAGGGGGAGGAAGCCG  
AAAGTTGACCTATCCCTGGAGGAAGCACGGGCTAAGTTCGTGCCAGCAGCCGCGGTAAAG  
ACGAACCGTGCGAACGTTGTTTCGGAATCACTGGGCTTAAAGGGCGCGTAGGCGGGCGATC  
AAGTCAGGGGTGAAATCTTTCGGCTTAACCGGAAAATAGCCTTTGATACTGGTTGTCTTG  
AGGGAGGTAGGGGCATGTGGAAGTTCGGGTGGAGCGGTGAAATGTGTTGATATCGGAAGG  
AACGCCGCTGGCGAAAGCGACGTGCTGGATCTCTTCTGACGCTGAGGCGCGAAAGCTAGG  
GTAGCGAACGGGATTAGAACCCTTGATAGTCC

>Otu10865

CCAGCCTACGGGGGGCAGCAGTGGGGAATCTTGCGCAATGGGCGAAAGCCTGACGCAGCG  
ACGCCGCGTGAGTGATGAAGGCCCTTCGGGTGTAAAGCTCTGTGGGGAGAGACGAATAAG  
TCTTGGTGAATATCCACGATGATGACGGTATCTCCTTAGCAAGCACCGGCTAACTCTGTG  
CCAGCAGCCGCGGTAAGACAGAGGGTGCAAACGTTGTTTCGGAATTACTGGGCGTAAAGCG  
TGTGTAGGCGGTCTAACAAGTCGGATGTGAAAGCCCCGGGCTCAACCCGGGAAGTGCAGT  
CGAAACTGGTAGACTGGAGTGTGCGAGAGGTGGGTAGAATTCTCGGTGTAGAGGTGAAAT  
TCGTAGATATCGAGAGGAATACCGGCGGCGAAGGCGGCCACTGGACGAACACTGACGCT  
GAGACACGAAAGCGTGGGGAGCAAACAGGATTAGATACCCAGTAGTCC

>Otu10871

CCAGCCTATGGGTGGCTCCAGTCGAGAATCTTCCGCAATGGACGAAAGTCTGACGGAGCG  
ACGCCGCGTGAGGATGAAGTTCTTCGGAATGTAAACTCCTTTTGCCAGGGAAAAAGTTA  
TTGATTGTACCTGGAGAATAAGAAGTTGCTAAACTCGTGCCAGCAGCAGCGGTAATACGA  
GTGCTTCGAGCATTATCCGGAATCATTGGGCGTAAAGGGTGCGTAGGTGGTAGTGTGAGT  
CTCGTGTAATACTTTCGGCTCAACCGGGAAGTGCACGAGAAACGGCACAAGTAAAGAGG  
ACGAGAGAGGTTTCTGGAAGTCAATGGTGTAGCGGTGAAATGCGTTGATATCATGGGGAAC  
ACCAAAAGCGAAGGCAAGAACTGGCTCGCTCCCGACACTGAAGCACGAAAGCGTGGGTG  
GCGAATGGGATTAGATACCCGCGTAGTCC

>Otu10876

CCAGCCTACGGGGTGCAGCAGTCGAGAATCATTCGCAATGGGCGAAAGCCTGACGATGCG  
ACGCTGCGTGAGTGATGAAGGCCCTTCGGGTGTAAAGCTCTTTCGCCTGGGAACAAGAGA  
GGTCTGCTAATATCAGGCCAATTTGAGGGTATCAGGTAAAGAAGCACCGGCTAACTCCGT  
GCCAGCAGCTGCGGTAATACGGAGGGTGCAAGCATTAAATCGGATTTATTGGGCGTAAAGG  
GCGCGTAGGCGGGGAGGAAAGTCAGATGTGAAACGCCGGGGCTCAACCCCGGAAGTGCAT  
TTGAAACTTCCTTTCTTGAGGGTAGGCGGAGATAATGGAATTCACAAAGTAGCGGTGAAA  
TGCGTAGATATGTGGAAGAACCCGGTGGCGAAGGCGATTATCTAGCTTATTCCTGACGC  
TGAGGCGCGAAAGCTAGGGGAGCAAACAGGATTAGATACCCAGTAGTCC

>Otu10878

CCAGCCTATGGGGTGCAGCAGTGGGGAATCTTGCGCAATGGGCGAAAGCCTGACGCAGCA  
ACGCCGCGTGAGGGACGAAGGCTTTCTGAGTTGTAAACCTCTTTCAGCAGGGACGATTGT  
GACGGTACCTGCAGAAGAAGCACCGGCCAACTACGTGCCAGCAGCCGCGGTGATACGTAG  
GGTGCAAGCGTTGTCCGGATTTATTGGGCGTAAAGAGCTCGTAGGCGGTTTGATAAGTCG  
GATGTGAAACCCCGAGGCTTAACCTGGGGCCGCCATTTCGATACTGTCATGACTTGAGTCC  
GGTAGGGGACCACGAATTCCTGGTGTAGCGGTGAAATGCGCAGATATCAGGAGGAACAC

CAGCGGCGAAGGCGGTGGTCTGGGCCGGCACTGACGCTGAGGCACGAAAAGTGTGGGGATC  
AAACAGGATTAGAGACCCCTGTAGTCC  
>Otu10880  
CCAGCCTATGGGTGGCACCAGTCGAGGATCTTCGGCAATGTGCGCAAGCACGACCGAGCG  
ACGCCGCGTGGGCGACGAAGGCCTTCGGGTGTAAAGCACTGTCGAGGGGGAGAAAAGCC  
CGCAAGGGTCTGATCTATCCCTGGAGGAAGCACGGGCTAAGTTCGTGCCAGCAGCCGCGG  
TAAGACGAACCGTGCGAACGTTGTTTCGGAATCACTGGGCTTAAAGGGCGCGTAGGCGGGT  
CGTCAAGTCAGGGGTGAAATACTTCGGCTCAACCGGAGAAGTGCTTCTGATACTGGCGAC  
CTCGAGGGGTGCAGGGGCATGTGGAACCTTCGGTGGAGCGGTGAAATGCGTAGATATCGG  
AAGGAACGCCGTGGCGAAAGCGACGTGCTGGACACCTTCTGACGCTGAGGCGCGAAAGC  
CAGGGGAGCAAACGGGATTAGAGACCCGTGTAGTCC  
>Otu10881  
CCAGCCATGGGGGGCTGCAGTCAAGAACATTTGGCAATGGGCGCAAGCCTGACCATGCGA  
CGCCGCGTGGTTGACGAAGTCCTTCGGGACGTAAAGACCTTTTACGCGTGAAGAAGTAAT  
TGACATTAGCGCGTGAATAAGGGGCTCCTAACTCTGTGCCAGCAGGAGCGGTAATACAGA  
GGCCCCAAGCATTATCCGGAATCACTGGGCGTAAAGGGTGTGTAGGCGGTTCATATTAGTC  
CTTCGTAAAGCACTGGGGCTTAACCCCGGTAATGCGGTGGAACCGGTATGACTCGAGGA  
CGCGAGAGGTAAGGGGAACCTCATGGTGTAGGGGTGAAATCCGTTGATATCATGGGGAAAC  
CCAAATGCGAAGGCACCTTACTGGCGCGCTCCTGACGCTGAAACACGAAAGCGTGGGAAT  
CGAACGGGATTAGAAACCCCCGTAGTCC  
>Otu10886  
CCAGCCTACGGGTGGCAGCAGTGGGGAATATTGGACAATGGGCGCAAGCCTGATCCAGCC  
ATGCCGCGTGAGTGATGAAGGCCTTCGGGTGTAAAGCTCTTTAGCCGATGATTATAATG  
ACTGTAGTCGGAAAATAAGCCCCGGCTAACTTCGTGCCAGCAGCCGCGGTAATACGAAGG  
GGGCGAGCGTTATTCGGAATCACTGGGCGTAAAGCGTGCGTAGGCTGTTTCACAAGTTGG  
AAGTGAAAGCCCAGGGCTCAACCCTGGAATTGCTTTCAAACACTGTGAGACTCGAATCTCG  
GAGAGGATAGCGGAATTTCCAGTGTAGTAGTGAAATACGTAGATATTGGAAGGAACACCA  
GTGGCGCAAGCGGCTATCTGGACGAGTATTGACGCTGAGGCACGAAAGCGTGGGGATCAA  
ACAGGATTAGAAACCCCTAGTAGTCC  
>Otu10892  
GGACTACCGGGGTTTCTAATCCTGTTTGCTACCCACGCTTTCGTGTCTCAGCGTCAGAAG  
TGGTCCAGTAAGCTGTCTACACCACAGGTGTTCCCTCCTGATATCTACGCATTTACCCGCT  
ACACCAGGAATTCCGCTTACCTCTCTCACCCCTCTAGCATTCTAGTTTCCGCTGCACCCTC  
CCAGCTAAGCCGGGAGATTTCAACAACAGACTGGGAACACCGCCTACACACTCTTTACGCC  
CAGTAATTCCGAACAACGCTCGCTGCCTACGTATTACCGCGGCTGCTGGCACGTAGTTAG  
CCGCAGCTTCTTCTCCGGGTACCGTCATTATCGTTCCCGTCGAAAGAGCTTTACACCCCG  
AAGGGCTTCATCGCTCACGCGGCGTCGCTGCATCAGGCTTTCGCCCATTGTGCAAGATTC  
CCCACTGGTGCCTCCCATAGGCTGG  
>Otu10900  
GGACTACGCGGGTATCTAATCCTGTTTGATCCCCACGCTTTCGTGCCTCAGCGTCAATCA  
TACTTTAGTAAGCTGCCTTCGCAATTGGTGTCTGTGACATATCTATGCATTTACCCGCT  
ACTTGTACATTCCGCTTACCTCAAGTACATTCAAGCCCATCAGTATCAAAGGCACTGCG  
ATAGTTGAGCTACCGTCTTTACCCCTGACTTAATAGGCCGCCTACGCACCCTTTAAACC  
CAATAAATCCGATAACGCTTGATCCTCCGTATTACCGCGGCTGCTGGCACGGAGTTAG  
CCGATCCTTATTCTCAGAGTACATTCAACCCCGTATACATACGGGGGTTTATTTCCCTGC  
AAAAGCAGTTTACAACCCGTAGGGCCGTCTTCCTGCACGCGGCATGGCTGGTTCAGGCTT  
GCGCCCATTGACCAATATTCTTACTGCTGCCACCCGTAGGCTGG  
>Otu10903  
CCAGCCTACGGGTGGCTGCAGTAGGGAATTTCCACAATGGGCGAAAGCCTGATGGAGCA  
ACGCCGCGTGCAAGGATGAAGGCTTTCGGGTGCTAAACTGCTTTTCTGATCGACGATTATG  
ACGGTAGGTACAGGAATAAGGGTCTGCTAACTACGTGCCAGCAGCCGCGGTACATCGTGGG  
ACCCAAGCGTTATCCGGAATTACTGGGCGTAAAGAGTTGCGTAGGTGGCAGAGTAAGCAA  
GATATGAAAGCGTGTGGCTCAACCATACATGGCATATTTTGAAGTCTCAGCTAGAGTAT  
GGGAGAGGTAGATGGAATTTCTAGTGTAGGAGTGAAATCCGTAGATATTAGAAGGAACAC  
CGATGGCGTAGGCACTTACCGGCCCATTAAGTACACTAAGTCACGAAAGCGTGGGGAGC  
AAACAGGATTAGAGACCCCTCGTAGTCC  
>Otu10914  
CCAGCCTACGGGACGCAGCAGTAGGGAATATTGCACAATGGAGGAACTCTGATGCAGCG

ACGCCGCGTGAGTGATGAAGGACTTCGGTTTTGTAAAGCTCTGTTCTCAGGGAATAAAAAA  
ATGAATGTACTTGAGGAGAAAAGGGACGGCTAACTTCGTGCCAGCAGCCGCGGTAATACGA  
AGGTCCCAAGCGTTGCTCGGAATCATTGGGCGTAAAGCGAGCGCAGGTGGTTTTGTAAAGT  
CAGGAGTGAAAGCCCCAAGGCTTAACCTTGGAAGTGCTTTTGATACTGCAAACTTGAGTG  
TGGGAGAGGGTGCTAGAATTCTTGGTGTAGTGGTGAAATACGTAGAGATCAGGAGGAACA  
CCGGTGGCGAAGGCGGGCACCTGGCCCAACACTGACACTTAGGCTCGAAAGCGTGGGGAT  
CAAACAGGATTAGAAACCCAGTAGTCC

>Otu10920

CCAGCCTACGGGTCGCAGCAGTGAGGGATATTGCACAATGGGCGAAAGCCTGATGCAGCG  
ACGCCGCGTGGGTGATGAAGGTCTTCGGATCGTAAAGCCCTTTTCTGTGTGACGAAAACA  
GACGGTAGCACAGGAATAAGTCTCGGCTAACTACGTGCCAGCAGCCGCGGTAACACGTAG  
GAGGCAAGCGTTATCCGGAGTTACTGGGCGTAAAGCGTGTGTAGGTGGTTATTCAAGTTC  
GGTGTGAAAGCGCCCGGCTCAACTGGGCGAGGACATCGAAGACTGAATGGCTAGAGGATG  
GTAGAGGGGCGTAGAATTCCGGGTGTAGCGGTGAAATGTGTAGAGATCCGGAGGAATACC  
AGTGGTGCAGACGGCGCCCCGGGCCATACCTGACACTGAGACACGAAAGCGTGGGGAGCG  
AACGGGATTAGAAACCCTGGTAGTCC

>Otu10921

CCAGCCTATGGGTTGCTGCAGTGAGGAATATTGCGCAATGGGCGAAAGCCTGACGCAGCG  
ACGCCGCGTGGAGGATGAAGGTCTTAGGATTGTAAACTTCTGTTAAGTGGGAAGAAAATC  
TCTTTTCTAATAAAAAAGAGCTATGACGGTACCATTAGAGAAAGCACCGGCTAACTTCGT  
GCCAGCAGCCGCGGTAATACGAAGGGTGCAAGCGTTATTCGGAATAATTGGGCGTAAAGG  
GTGCGCAGGCTGTATGTTAAGTCAACTGTTAAATTCTTCAGCCTAACTGAGGGTCTGCGG  
TAGATACTGGCAAACCTAGAGTATGGAAGAGAGAAGTGGAAATCTCGGAGTAGCGGTAAAA  
TGCGTAGATCTCGAGGGGAACACCGATGGCGAAGGCAGCTTCTTGGTCCATTACTGACGC  
TCAAGCACGAAAGCGTGGGGAGCAAACAGGATTAGATACCCTAGTAGTCC

>Otu10926

CCAGCCTATGGGAGGCAGCAGTCAAGAACCCTCCACAATGGACGAAAGTCTGATGGAGCG  
ATGCCGCGTGATTGATGAAGTGCTTCGGCACGTAAAGGTCTTTTATGAGGGAAGAAAATTA  
TTGACGGTACCTCATGAATAAGGGGCTCCTAACTCTGTGCCAGCAGGAGCGGTAATACAG  
AGGCCCCGAGCGTTATCCGGAATTATTGGGCGTAAAGGGTGTGTAGGTGGCGTTGTTAGT  
CGTTTGTGAAAGCCCCGGGGCTCAACCTCGGAGATGCGAACGAAACGGCAATGCTTGAGTA  
TGTGAGAGGTAAGCGGAACCTCATGGTGTAGGGGTGAAATCCGTTGATATCATGGGGAAACA  
CCAAATGCGAAGGCAATATACTGGCGCACTCCTGACACTGAAACACGAAAGCGTAGGTAG  
CGAATGGGATTAGATACCCAGTAGTCC

>Otu10933

CCAGCCTATGGGTCGCACCAGTGGGGAATTGTTTCGCAATGGGCGAAAGCCTGACGACGCA  
ACGCCGCGTGGAGGATGAAGACCTTCGGGTCGTAAACTCCTTTTCGACCGAGATGAATATT  
CATCGGCTTAATACACCGATGGAGTGACAGTATCGAGGGAAGAAGCCCCGGCTAACTCTG  
TGCCAGCAGCCGCGGTAATACAGGGGGGGCAAGCGTTGTTTCGGAATTACTGGGCGTAAAG  
GGTTCGTAGGTGGCTTGTTGAGTCAGACGTGAAATCCCTCAGCTTAACTGGGGAACCTGCG  
TCTGATACTGACGAGTTTGAGTGCAGGAGAGGAACGCGGAATTCCAGGTGTAGCGGTGAA  
ATGCGTAGATATCTGGAGGAACACCGGTGGCGAAGGCGGCGTTCTGGACTGCAACTGACA  
CTGAGGAACGAAAGCCAGGGGAGCAAACGGGATTAGAGACCCCCGTAGTCC

>Otu10945

CCAGCCTACGGGAGGCAGCAGTAGGGAATTTTCCACAATGGGCGAAAGCCTGATGGAGCA  
ACGCCGCGTGAGGGATGAAGGTTTTTCGGATCGTAAACCTCTTTGGAGCGGGAAGAATAGC  
GCTTGGGTGAATAATCCAGGCGCCTGACGGTACCGCTAGAACAAGACACGGCTAACTCTG  
TGCCAGCAGCCGCGGTAATACAGAGGTGTCAAACGTTGTCCGGAATTATTGGGCGTAAAG  
GGCGCGTAGGCGGCCGGGTAAGTGAGATGTGAAAGCTCTGGGCTCAACCCAGGAATTGCA  
TTTCATACTGCTCGGCTAGAGATTGGTAGAGGATGGCGGAATTCCAGGTGTAGCGGTGAA  
ATGCGTAGATATCTGGAGGAACACCTGTGGCGAAGGCGGCTATCTGGTCCAATTCTGACG  
CTGAGGCGCGAAAGGTAGGGGAGCAAACAGGATTAGATACCCGGGTAGTCC

>Otu10954

CCAGCCTACGGGGTGCTCCAGTGGGGAATTTTTCGCAATGGGGGAAACCCTGACGCAGCA  
ACGCCGCGTGGAGGATGAAGTCCCTTGGGACGTAAACTCCTTTTCGACCAAGACGATAATG  
ACGGTACTGGTGGAAGAAGCACCGGCCAACTCTGTGCCAGCAGCCGCGGTAATACAGAGG  
GTGCAAGCGTTGTTTCGGAATTATTGGGCGTAAAGGGTTTCGTAGGCGGGGAATGCAAGTCAA  
GTGTGAAATCCCCAGGCTCAACCTGGGACGTGCATTTGAGACTGTGTTTCTTGAGTTTCG

GAGAGGGTGGTGGAAATTGCTGGTGTAGGAGTGACATCCGTAGAGATCAGCAGGAACACCG  
GAGGCGAAGGCGACCACCTGGCCGAATACTGACGCTGAGGAACGAAAGCGTGGGGAGCAA  
ACAGGATTAGAAACCCTGGTAGTCC

>Otu10956

CCAGCCTATGGGTGTCAGCAGTAGGGAATTTTGCACAATGGGCGCAAGCCTGATGCAGCA  
ATGCCGCGTGAGTGAAGAAGGCTCTTGGGTGTAAAGCTCTTTCGGCTGGGAAGAAGGGG  
TAGCACTCGAACAGAAGGCTATTCTGACGGTACCAGAAGAAGAAGCACCTGCTAACTTCG  
TGCCAGCAGCAGCGGTAATACTAAGGGTGCAAGCGTTGTTCGGAATTACTGGGCGTAAAG  
CGCGCGTAGGCGGGTTAGTAAGTCGATTGTGAAATCCCTGGGCTTAACCTGGGAAGTGA  
GTCGAAACTACTAATCTTGAATGTCTGAGAGGATGGCGGAATAACCGGTGTAGTAGTGAA  
ATACGTAGATATCGGTTAGAACATCTGAGGCGAAGGCGGCTATCTGGCGGTACATTGACG  
CTGATGCGCGAAAGCGTGGGGAGCAAACAGGATTAGATAACCCCGTAGTCC

>Otu10963

CCAGCCTACGGGTGGCAGCAGTGGGGAATTTTGCGCAATGGGCGAAAGCCTGACGCAGCG  
ACGCCGCGTGCGGGATGAAGGCCCTTCGGGTGCTAAACCGCTTTCAGCAGGGACGAAATTG  
ACGGTACCTGCAAAAGAAGGCCCGGCCAACTACGTGCCAGCAGCCGCGGTGATACGTAGG  
GGTCTAGCGTTGTCCGGAATCATTGGGCGTAAAGAGCTCGTAGACGGTTCGGCAAGTCGG  
ATGTGAAATCTCCACGCTCAACGTGGAGGGGCCATTTCGAAACTGCTGTGACTCGAGTCCG  
GTAGGGGAGTTCGGAATTCCCGGTGTAGCGGTGAAATGCGCAGATATCGGGAGGAACACC  
AGTGCGCAAGGCGGAACCTCTGGGCCGGAACCTGACGCTGAGGAGCGAAAGCGTGGGGAGCG  
AACAGGATTAGAAACCCTCGTAGTCC

>Otu10966

CCAGCCTACGGGGGGCAGCAGTGGGGAATATTGCGCAATGGGCGAAAGTCTGACCGAGCG  
ACGCCGCGTGCGGGATGAAGGCCCTTTGGGTGTAAACCGCTGTACAGGTGAGCAAATC  
ACGTTACGTGAACAACCTGGACGTGTTGAGTTAAGCTTGAGAGGAAGCCCCGCTAATCAC  
GTGCCAGCAGCGGCGGTAATACGTGAGGGGCGAACGTTGTTTCGGTGTCACTGGGCTTAAA  
GGGTGCGTAGGTGGCTGCGTAAGTAACGTGTGAAAGCCCTCGGCTTACCCGGGGAAATTGC  
GCGTTATACTGCGCGGCTTGAGGATTTTACGGGGAAAGGGGAACCTCCGAGTGTAGCGGTGA  
AATGCGCAGATATTCGGGGGAAGGCCGGCGGCGAAGGCGCCTTTCTGGGAAATTCTCTGAC  
ACTGAGGCACGAAAGCGTGGGGAGCAAACAGGATTAGAAACCCTGGTAGTCC

>Otu10968

CTAGCCTACGGGTGGCTGCAGTCAAGAATTTTCCCAATGGACGAAAGTCTGAGGGAGCG  
ACGCCGCGTGCGAGGAAGAACTCTTCGGGGTGTAAACTGCTTTTGCATGGGAATAAGATC  
TGAATGTACCATGCGAATAAGGACCTGCTAAACTCGTGCCAGCAGCAGCGGTAATACGAG  
TGGTCCAAGCGTTATCCGGTTTTATTGGGCGTAAAGGGTCCGCAGGTGGTTCGATAAGTC  
TGGTGTTAAATCTGGCGCTCAACGTGAGAGCCGCATTGGAAACTATCGAGCTAGAGGCT  
GGGAGAGGTGCATGGAATTGTTCGGTGTAGTAGTAAATGCGTTAATATCGACAAGAACAC  
CAAAGGCGAAGGCATTGCACTAGAACAGTTCTGACACTCAGGGACGAAAGCGTGGGGAGC  
GAATGGGATTAGAGACCCGCGTAGTCC

>Otu10969

CCAGCCTATGGGGGGCACCAGTGGGGAATCTTGCGCAATGGGCGAAAGCCTGACGCAGCC  
ACGCCGCGTGAGTGAAGAAGGCCCTTCGGGTGTAAAGCTCTGTGCCCCGGGACGAAAAGC  
CCTTGGAATAATACTCCAGGGGCCTGACGGTACCGGGAAAGGAAGCACCGGCTAACTCTG  
TGCCAGCAGCCGCGGTAATACAGAGGGTGCAAGCGTTGCTCGGAATTATTGGGCGTAAAG  
GGTAGGTAGGTGGTCTCATTTGTCTCGTGTAAGCCTTGGGCTTAACCTCAAGAAGTGCG  
CGAGAAACGGTGAGACTGGAGTCCTGGAGAGGGTCGTGGAATTCGCGGTGTAGCGGTGAA  
ATGCGTAGAGATCGGGAGGAACACCAGAGGCGAAGGCGGCGACCTGGACAGGTACTGACA  
CTCAACTACGAAAGCGTGGGGAGCAAACAGGATTAGATAACCCGCGTAGTCC

>Otu10977

CCAGCCTATGGGGTGCTCCAGTGGGGAATATTGGACAATGGGCGCAAGCCTGATCCAGCC  
ATGCCGCGTGATGATGAAGGCCCTAGGGTTGTAAAGTCCTTTCGGCGGGGAAGATAATG  
ACGGTACCCGCGAGAAGAAGCCCCGGCTAACTTCGTGCCAGCAGCCGCGGTAATACGAAGG  
GGGCTAGCGTTGCTCGGAATCACTGGGCGTAAAGCGCACGTAGGCGGCTTTTAAAGTCAG  
GGGTGAAATCCTGGAGCTCAACTCCAGAACTGCCTTTGATACTGAGAAGCTTGAGTCCGG  
GAGAGGTGAGTGGAAGTGCAGGTGTAGAGGTGAAATTCATAGATATCCGCAGGAACATCC  
GAGGCGAAAGCGGCTCGCTGGATCGCAACTGACGCTGAGGGACGAAAGCTAGGGGAGCAA  
ACAGGATTAGAGACCCCTCGTAGTCC

>Otu10978



CCAGCCTATGGGGTGCTGCAGTCGAGGATCTTTCGCAATGGGCGCAAGCCTGACGAAGCG  
ACGCCGTGTGAGCGATGAAGGCCTTAGGGTCGTAAAGCTCTTTCGCTAGGGAGCAAGAGA  
GGCTGTCTAATAAGCAGTTAATTTGAGAGTACCTGGTAAAGAAGCACCGGCTAACTCCGT  
GCCAGCAGCTGCGGTAATACGGAGGGTGCAAGCATTAAATCGGAATTATTGGGCGTAAAGG  
GCGCGTAGGCGGTTTTTTAAGTCAGATGTGAAATTCTGGGGCTCAACCCCAGAGCTGCAT  
TTGAAACTGGGAGACTGGAGGGTAGGCGGAGAAAGCGGAATTCACGTGTAGCGGTGAAA  
TGCGTAGATATGTGGAAGAACACCGGTGGCGAAGGCGGCTTCTAGCTTATTCCTGACGC  
TGAGGCGCGAAAGCAAGGGGAGCAAACAGGATTAGATACCCTAGTAGTCC

>Otu10982

CCAGCCTATGGGTGGCACCAGTAGGGAATTGTTCGGCAATGGGCGAAAGCCTGACCGCGCG  
ACGCCGCGTGAGGAAGAAGGCCTTCGGGTGTAAACTTCTTTTGTGGGGGACGATTATG  
ACGGTACCCCAAGAATAAGGGCCTGCTAACTACGTGCCAGCAGCAGCGGTAATACGTAGG  
GCCCAGCATTATCCGGAATTATTGGGCGTAAAGAGCGTGTAGGTGCTTTATTAAGTCGG  
TCGTAAATCTCACTGCTCAACAGTGAGGCCGCGAGCGATACTAATGAAATTGAGGTTTG  
CAGGGGTGAGCAGAACTCTTGGAGTAGGGGTGAAATCCGTTGATACCAAGAAGAATACCA  
ATGGCGAAGGCAGCTCACTGGGCAACACCTGACACTGAGACGCGAAAGCGTGGGGAGCAA  
ACAGGATTAGAGACCCTAGTAGTCC

>Otu10985

CCAGCCTACGGGATGCTGCAGTAAGGAATATTGGACAATGGAGGCAACCCTGATCCAGCA  
ATGCCGCGTGAGTGATGAAGGCCTTCGGGTGTAAAGCTCTTTTGTGAGGGACGATGATG  
ACGGTACCTGACGAATAAGCTCCGGCTAACTTCGTGCCAGCAGCCGCGGTAATACGAGGG  
GAGCTAGCGTTGTTCCGGAATTACTGGGCGTAAAGGGCGCGTAGGCGGTTCTATAAGTCAG  
ATGTGAAAGCCCCGGGCTTAACCTGGGAGGTGCATTTGAAACTGTAGGGCTTGAGATCGA  
GAGAGGAAAGTGGAATTACGAGTGTAGAGGTGAAATTCGTAGATATTCGTAAGAACACCA  
GTGGCGAAGGCGACTTCTTGCTCGATACTGACGCTAAGGCGCGAAAGCGTGGGGAGCAA  
ACAGGATTAGAAACCCTTGTAAGTCC

>Otu11000

CCAGCCTATGGGTTGCTGCAGTCGAGGATTTTTCTCAATGGAGGAAACCCTGAAGGAGCG  
ACGCCGCGTGAGGGATGAAGGTCTTCGGATTGTAAACCTCTGTCATCTGGGAACAATGCT  
GTTACCTAACACGTGAACAGTTGATAGTACCGGAAGAGGAAGCAGTGGCTAACTCTGTG  
CCAGCAGCCGCGGTAATACAGAGACTGCAAGCGTTGTTTCGGATTCAATTGGGCGTAAAGGG  
TCCGCAGGCGGTTCGGTTAAGTCGGATGTGAAATCTCACAGCCTAACTGTGATAGGTCAAT  
CGAAACTAGCCGGCTTGGGGAGTGGAGAGGAGATTGGAATTGCTGGTGTAGCAGTGAAAT  
GCGTAGATATCAGCAAGAACACCGGTGGCGAAGGCGAATCTCTGGACACTTCCTGACACT  
CAGGGACGAAAGCCAGGGGAGCAAACGGGATTAGATACCCGGGTAGTCC

>Otu11006

CCAGCCTATGGGTGGCTGCAGTAGGGAATATTGGACAATGGGCGCAAGCCTGATCCAGCC  
ATCCCGCGTGAGGATTAAGGTCCTATGGATTGTAAACTTCTTTTCTCTGGGAATAAAAA  
GTGGAGTTCACTCCGCCTTGAAGGTACCAGAGGAATAAGCACCGGCTAACTCCGTGCCAG  
CAGCCGCGGTAATACGGAGGGTGCAAGCGTTATCCGGATTCACTGGGTTTAAAGGGTGCG  
TAGGTGGCTTTGTAAGTCAGTGGTGAAAGCCCGGAGCTCAACTCCGGAAC TGCCATTGAT  
ACTGCTTAGCTTGAATCAAGTCGAGGTGGATGGAATAATACATGTAGCGGTGAAATGCTT  
AGATATGTATTAGAACACCGATTGCGAAGGCAGTTCACTAGGCGTGATTGACACTGAGG  
CACGAAAGCGTGGGGATCAAACAGGATTAGAAACCCCCGTAGTCC

>Otu11021

CCAGCCTACGGGATGCAGTAGGGAATATTGGGCAATGGGCGAAAGCCTGACCCAGCAACG  
CCGCGTGCACGATGAAGGTCTTCGGATCGTAAAGTGCTTTTCTGAGGGATGAGAAAGGAC  
AGTATCTCAGGAATAAGTCTCGGCTAACTCTGTGCCAGCAGCCGCGGTAATACAGAGGGG  
GCAAGCGTTATTCGGAATTATTGGGCGTAAAGGGCGCGTAGGCGGTGTTATAAGTCAGAT  
GTGTAATCCCCGAGCTCAACTTGGGAACTGCATCTGAGACTGTAGTACTAGAGTGCTGGA  
GAGGGTGGTAGAATTCACGTGTAGCGGTGAAATGCGTAGAGATGTGGAGGAATACCACT  
GGCGAAGGCGGCCACCTGGACAGTAACCTGACGCTGAGGCGCGAAAGTGTGGGTAGCAAAC  
AGGATTAGAAACCCGAGTAGTCC

>Otu11022

CCAGCCTACGGGGGGCAGCAGCTAAGAATCTTCCGCAATGGGGGAAACCCTGACGGAGCG  
ACGCCGCGTGAGTATGAAGGCCGTAAAGGTTGTAAATCCTTTTGTGCGGTGAAGAATAAA  
TCAAGGAGTGGAAGCCTTGGTGATGACGTTAGCCGACGAATAAGCCCCGGCTAATTACG  
TGCCAGCAGCCGCGGTAATACGAAGGGGGCTAGCGTTGTTTCGGAATCACTGGGCGTAAAG

CGTACGCAGGCGGATTGATAAGTCAGGGGTGAAATCCCGGAGCTCAACTTCGGAATTGCC  
TTTGATACTGTCTATCTTCGAGTTCGGGAGAGGTTGGCGGAATTCCTAGTGTAGAGGTGA  
AATTCGTAGATATTAGGAAGAACACCAGTGGCGAAGGCGGCCAACTGGCCCCGATACTGAC  
GCTCATGTACGAAAGCGTGGGGAGCAAACAGGATTAGATACCCCAGTAGTCC

>Otu11024

CCAGCCTACGGGTGGCACCAGTTTGTAGAAATTTGCGCAATGGGCGAAAGCCTGACGCAGCG  
ACGCCGCGTGAGGGATGAAGGTCTTCGGATTGTAAACCTCTGTGAGCAGAACGAAACCC  
TATCGGTAAATCATCGGTAGGTTTGACGGTACTGTTAGAGGAAGCTATGGCTAACTCTGT  
GCCAGCAGCCGCGGTAAAACAGAGGTAGCGAGCGTTGTCCGGAATTACTGGGCGTAAAGG  
GCGTGTAGGTGGCCTTGTAAGTCCAGCGTTAAATTTCCCAGCTTAACTGGGATCAGTCGC  
TGGATACTGCTTGGCTTGAGGACAGTAGAGGAGAGTGGAATTTCCCGGTGTAGCGGTGAAA  
TGCGTAGATATCGGGAGGAACACCTGTGGCGAAGGCGGCTCTCTGGTCTGTCCCTGACAC  
TAAGGCGCGAAAGCTAGGGGAGCAAACGGGATTAGAAACCCCCGTAGTCC

>Otu11025

CCAGCCTACGGGATGCAGCAGTGGGGAATATTGGACAATGGGGGCAACCCTGATCCAGCA  
ATGCCGCGTGTGTGAAGAAGGCCTGAGGGTTGTAAAGCACTTTCAGTGGGGAGGAGAGAT  
GACTGTTTTAAGAGATGGTTATAAGGACGTTACCCACAGAAGAAGCACCCGGCTAACTCCGT  
GCCAGCAGCCGCGGTAATACGGAGGGTGCAGCGTTAATCGGAATTACTGGGCGTAAAGA  
GTGCGTAGGTGGTTGATTAAAGTTATATGTGAAATCCCTGGGCTTAACCTGGGCAGGTCAT  
ATAATACTGATTGACTCGAGTATGGGAGAGGGTAGTGGAATTTCCCGGTGTAGCGGTGAAA  
TGCGTAGATATAGGAAGGAACACCAGTGGCGAAGGCGACCACCTGGACTGATACTGACAC  
TGAGGTGCGAAAGCGTGGGGAGCAAACAGGATTAGAGACCCGAGTAGTCC

>Otu11026

CCAGCCTACGGGATGCACCAGTTTCGAATTTTTCGCAATGGGCGAAAGCCTGACGGAGCG  
ACGCCGCGTGGGGGATGAAGGTCTTCGGATTGTAAACCCCTGTCAGCTGGGAACAAGGTC  
TCGTGGTGAATAACCATGAGATTTGATAGTACCGGCAGAGGAAGCCGTGGCTAACTCTGT  
GCCAGCAGCCGCGGTAATTCAGAGACGGCAAGCGTTGTTTCGGATTCACTGGGCGTAAAGG  
GTCCGCAGGTGGCGAAGCAAGTCTGACGTGAAATCCCGCGGCCTACCGCGGAACCTGCGTC  
GGATACTGCCTTGCTAGAGGACGGCAGAGGAGACTGGAATTCATGGTGTAGCGGTGAAAT  
GCGTAGATATCATGAGGAACACCCGGTGGCGAAGGCGAGTCTCTGGACCGTTCTTGACACT  
CAGGGACGAAAGCGTGGGGAGCAAACGGGATTAGATACCCCTCGTAGTCC

>Otu11033

CCAGCCTATGGGGGGCTGCAGTCGAGAATTTTCTCAATGGGGGAAACCCTGAAGGAGCG  
ACGCCGCGTGGAGGATGAAGGTTTTTCGGATTGTAAACTCCTGTCATTGGGGAACAATTGC  
ATGGGTTTTAACTGACCTGTGTTTGATAGTACCCGAAGAGGAAGAGACGGCTAACTCTGTG  
CCAGCAGCCGCGGTAATACAGAGGTCTCAAGCGTTGTTTCGGATTCACTGGGCGTAAAGGG  
TGCGTAGGCGGTGGTGCAAGTTGGATGTGAAATCCCGGGGCTTAACCCCGGAACCTGCATT  
CAATACTGCTCTGCTAGAGTACTGGAGAGGAGATTGGAATTCACGGTGTAGCAGTGAAAT  
GCGTAGATATCGTGAGGAAGACCAGTGGCGAAGGCGAATCTCTGGACAGTTACTGACACT  
CATATGCGAAAGCTAGGGTAGCAAACGGGATTAGAAACCCCTCGTAGTCC

>Otu11043

CCAGCCTACGGGGGCGCAGCAGTTTGGAATATTCCACAATGGGCGAAAGCCTGATGGAGCG  
ACGCCGCGTGCAGGATGAAGGCCTTCGGGTCGTAAACTGCGGTAGTAAGCAAAGAATGCA  
AATGACTAGCTTACGGAAAGAGGTGGGTAACCTACGTGCCAGCACCAGCGGTAAACGCTAG  
ACCTCAAGCGTTATCCGGATTTATTGGGCGTAAAGAGCATGTAGGAGGTTTTGCGCGTCT  
TTTGTTAAAGCCCCACCGCTAACGGTGGGAGTGCACGAGATACGGCAAGACTAGAGGATG  
TTAGAGGTACCAGGAACTCACGGTGTAGGGGTGAAATCCGTTGATATCGTGGGGAACACC  
AAAGGCGAAGGCAAGGTACTGGGACACTCTGACTCTGAGATGCGAAAGCGTGGGGAGCA  
AAAAGGATTAGAAACCCGCGTAGTCC

>Otu11045

CCAGCCTATGGGGGGCTCCAGTGGGGAATTTTTCGCAATGGGGGAAACCCTGACGCAGCA  
ACGCCGCGTGGAGGATGAAGTACTTCGGTACGTAAACTCCTTTTCGATCGGGACGATAATG  
ACGGTACCGGAGAAGAAGCCCCGGCTAACTTCGTGCCAGCAGCCGCGGTAATACGAGGG  
GGGCGAGCGTTGTTCCGGAATTATTGGGCGTAAAGGGTGCGTAGGCGGTTTTGTAAAGTCTT  
ATGTGAAATCTATGGGCTCAACTCATAGACTGCATGAGAACTGCAGGGCTTGAGTGTGG  
GAGAGGTGAGTGGAATTTCCCGATGTAGCGGTGAAATGCGTAGATATCAGGAGGAACACCG  
GTGGCGAAGGCGACTTTTCTGGCCCTATACTGACGCTGAGACGCGAAAGCGTGGGTAGCAA  
ACAGGATTAGAGACCCCTTGTAAGTCC

>Otu11058

CCAGCCTACGGGTGGCAGCAGTGGGGAATATTGCACAATGGGCGAAAGCTTGATGCAGCG  
ACGCCGCGTGAGGATGAAGGTTTTTCGGATTGTAACTCCTGTAAAGTGGGATGAAAGAC  
TGATACCTAATACGTATTGGGGATGACAGTACCCTAGAGAAAGCACCGGCAAACCTTCGT  
GCCAGCAGCCGCGTAATACGAAGGGTGCAGCGCTTATTCGGAATCACTGGGCGTAAGGA  
GCGTGAAGGCGGTTTTTTAAGTCATTTGTAAAGTACCCGGCTTAAGTGGGTAAATGCGA  
GTGATACTGGAAGGCTAGAGTGCAGGAGAGAAAGGTAGAATTCTCGGAGTAGCGGTAAAA  
TGCGTAGATCTCGAGAGGAACACCGGTTGCGAAGGCGGCCTTTTGGCCTGTTACTGACGC  
TAAAGCGCGAAAGCGTGGGGAGCAAACAGGATTAGATACCCTAGTAGTCC

>Otu11064

CCAGCCTATGGGTGCTGTCAGTGGGGAATTTTGGACAATGGGGGCAACCCTGATCCAGCC  
ATGCCGCGTGCGGGAAGAAGGCCTTCGGGTGTAAACCGCTTTTGGTTCGGGAAGAAAGG  
TTCGTCCTAACAGGGCGGACTGTTGACGGTACCGGCAGAATAAGCACCGGCTAACTACGT  
GCCAGCAGCCGCGTAATACGTAGGGCGCGAGCGTTAATCGGAATTACTGGGCGTAAAGC  
GTGCGCAGGCGGTAAGTTAAGTCTGATGTGAAAGCCCCGGGCTCAACCTGGGAATGGCAT  
TGGAAGTGGCTTGCTGGAGTGTGGCAGAGGGGGGTGGAATTCGCGCTGTAGCAGTGAAA  
TGCGTAGAGATGCGGAGGAACACCGATGGCGAAGGCAGCCCCCTGGGCCAACACTGACGC  
TCAGGCACGAAAGCGTGGGGAGCAAACAGGATTAGATACCCTTGTAGTCC

>Otu11080

CCAGCCTACGGGTGGCTGTCAGTGGGGAATTTTGGACAATGGACGAAAGTCTGATCCAGCG  
ACGCCGCGTGAGGGACGAAGGTTTTTCGGATCGTAACTTCTTTTGCAGGGGACGAAAGCG  
CGCAAGCGTTTGACAGTACTCTGCGAATAAGCCACGGCTAACTACGTGCCAGCAGCCGCG  
GTAATACGTAGGTGGCGAGCGTTACTCGGAATTACTAGGCGTAAAGCGTGTGTAGGCGGG  
AGCTTAAGTCTGCTGTAAATCTCATAGCTCAACTATGAAATGCCGGCAGATACTGGGCT  
TCTTGAATTTCGGTAGAGGAAACTGGAATTCAGGTGTAGCGGTGAAATGCGCAGATATCT  
GGAAGAACGCCAAAGGCGAAGGCAGGTTTCTGGGCCGCAATTGACGCTGAGACACGAAAG  
CTAGGGGAGCAAACAGGATTAGATACCCGAGTAGTCC

>Otu11088

CCAGCCTACGGGGGGCTGTCAGTGGGGAATTTTGCGCAATGGGCGAAAGCCTGACGCAGCA  
ACGCCGCGTGGGTGATGAAGGTCTTCGGATCGTAAACCCCTGTCGTCAGGGACGAAGGTC  
ATCGGTTGAACATTCCGGTGGCTTGACGGTACCTGGAGAGGAAGCCCCGGCTAACTCTGT  
GCCAGCAGCCGCGTAATACGAAGGGGGCTAGCGTTGTTTCGGAATCACTGGGCGTAAAGC  
GCACGCAGGCGGATTGATTAGTCAGGGGTGAAATCCCGGGGCTCAACCTCGGAATTGCCT  
TTGATACTGTCACTCTTGAGTTCGGGAGTGGTTGGCGGAATTCCTAGTGTAGAGGTGAAA  
TTCGTAGATATTAGGAAGAACACCAAGTGGCGAAGGCGGCCAACTGGCCCGATACTGACGC  
TCATGTGCGAAAGCGTGGGGAGCAAACAGGATTAGATACCCTAGTAGTCC

>Otu11089

CCAGCCTACGGGGGGCAGCAGTCGAGAATTTTTCACAATGGGGGAAACCCTGATGGAGCG  
ACGCCGCGTGGGGGATGAATGGCTTCGGCCCGTAAACCCCTGTCATTTCGGGATCAATGCC  
TGCTATTTTAAAAGATGGTAGGTTGATAGTACCGGAAGAGGAAGGGACGGCTAACTCTGTG  
CCAGCAGCCGCGTAATACAGAGGTCCCAAGCGTTGTTTCGGATTCACTGGGCGTAAAGGG  
TGCGTAGGTGGCGGGGTAAGTCGGATGTGAAATCTCCGAGCTCAACTCGGAAATGGCATT  
GGAACTACTCTGCTCGAGGGTTGGAGGGGGGACTGGAATACTTGGTGTAGCAGTGAAAT  
GCGTAGATATCAAGTGGAACACCAGTGGCGAAGGCGAGTCCCTGGACAACCTCTGACACT  
GAGGCACGAAAGCTAGGGGAGCAAACAGGATTAGAAACCCCGTAGTCC

>Otu11090

CCAGCCTATGGGACGCAGCAGTCGAGAATCTTCGGCAATGGGGGAAACCCTGACCGAGCG  
ACGCCGCGTGATGGATGAAGGCCTTCGGGTGTAAACCGCTGTCAGAGGGGAGGAAATGT  
CGGTGGGTCTCCCATCGATTGACCTATCCTCAGAGGAAGGACGGGCTAAGTTCGTGCC  
AGCAGCCGCGGTAAGACGAACCGTCCAAACGTTATTTCGGAATCACTGGGCTTAAAGGGTG  
CGTAGGCGGCCCGGGAAGTTGGGTGTGAAATCCCTCGGCTCAACCGAGGAACTGCGCCCA  
AACTGCGAGGGCTGGAGGGAGACATAGGTGAGCGGAACTTAGGGTGGAGCGGTGAAATGC  
GTTGAGATCCTAAGGAACACCAGTAGCGAAGGCGGCTCACTGGGTCTCTTCTGACGCTGA  
TGCACGAAAGCTAGGGGAGCGAAGAGGATTAGATACCCTAGTAGTCC

>Otu11091

CCAGCCTATGGGGGGCTGTCAGGCGAGAATATTCGCAATGGGCGAAAGCCTGACGGAGCG  
ACGCCGCGTGATGGATGAAGTGCTTCGGTACGTAAACATCTTTTATCGAGGAAGAACTAA  
ATGACGGTACTCGATGAATAAGGGGCTCCTAACTCTGTGCCAGCAGGAGCGGTAATACAG

AGGCCCCAAGCATTACCCGGAATCACTGGGCGTAAAGGGTGTCTAGGCGGCTATGTTAGT  
CTCTCGTAAAAATCTGCGGGCTCAACCTGCAGCGCGCGGGGAAACGGCATAGCTCGAGAG  
CGCGAGAGGTAGAGGGAACACGCGTGGAGGGGTGAAATCCGTTGATATCGTGGGGAACA  
CCAAAGGCGAAGGCACTCTACTAGCGCGTTTCTGACGCTCAAACACGAAAGCCAGGGGAG  
CGAACGGGATTAGAGACCCGTGTAGTCC

>Otu11119

CCAGCCTACGGGTCGCTGCAGCTAAGAATATTCCGCAATGGGAGAAATCCTGACGCAGCG  
ACGCCGCGTGAGCGATGAAGGCCTTCGGGTGTAAAGCTCTGTGGGGAGGGACGAATAAG  
GGTTGGCTAATATCCAATCTGATGACGGTACCTCCTTAGCAAGCACCGGCTAACTCTGTG  
CCAGCAGCCGCGGTAAGACAGAGGGTGCAAACGTTGTTTCGGAATTACTGGGCGTAAAGCG  
CGTGTAGGCGGCTACGTAAGTCGGACGTGAAAGCCACGGCTCAACTGTGGAAGTGCGCT  
CGAAACTGCGTAGCTTGAGTTTTGGAGAGGAAGGCGGAATACTTGGTGTAGAGGTGAAAT  
TCGTAGATATCAGGTAGAACACCAGTGGCGAAGGCGGCCTTCTGGACAATGACTGACGCT  
GAAACGCGAAAGCGTGGGGAGCAAACAGGATTAGATACCCGCGTAGTCC

>Otu11130

CCAGCCTATGGGGTGCAGCAGTGGGGAATTTTTCGCAATGGGGGAAACCCTGACGCAGCA  
ACGCCGCGTGAGTGATGAAGGCCTTCGGGTCTGTAAGCTCTGTGAGAGGGAAAGAAGTGT  
AGGAGGGCTAATACCCCTTTTACTTGACGGTACCCTCAAAGGAAGCACCGGCTAACTCCG  
TGCCAGCAGCCGCGGTAATACGAGGGTGCGAGCGTTGTTTCGGAATTATTGGGCGTAAAG  
CGCGTGACGGCGGTTTGGTAAGTTGGATGTGAAAGCTCCTGGCTTAACTGGGAGAGGTGCG  
TTCAATACTGCCAGACTAGAGGATGGTAGAGGGAGGTGGAATTCTGGGTGTAGTGGTGAA  
ATGCGTAGATATCCAGAGGAACACCAGTGGCGAAAGCGGCCTCCTGGACCATTTCTGACG  
CTCATACGCGAAAGCTAGGGTAGCAAACGGGATTAGAAACCCTAGTAGTCC

>Otu11143

CCAGCCTATGGGTGGCTGCAGTAGGGAATATTGGTAATGTGCGAAAGCGCGAACCAGCAA  
CGCCGCGTGACGATGAAGGCCTTCGGGTGTAAAGTGCTTTTAGAGAGGATGAGGAAGG  
ACAGTACTCTCTGAATAAGCCTCGACTAACTACGTGCCAGCAGCCGCGGTAAAACGTAGG  
AGGCAAGCGTTATCCGGATTCAGTGGGCGTAAAGCGCATGCAGGCGGTTTCGGTAAGTTGG  
GCGTGAAATCTCCCGGCTCAACTGGGAGAGGTGCTTCAATACTACCGGGCTAGAGAGCAG  
TAGAGGAAGATGGAATTCCTGGTGTAGTGGTGAAATGCGTAGATATCGGGAGGAACACCA  
GTGGCGAAGGCGATCTTCTGGGCTGTTTCTGACGCTCATATGCGAAAGCTAGGGTAGTAA  
ACAGGATTAGAGACCCCCGTAGTCC

>Otu11147

CCAGCCTATGGGGGGCTCCAGTGAGGAATATTGCGCAATGGCCGAAAGGCTGACGCAGCG  
ACGCCGCGTGAAAGGATGAAGTCCGTTAGGATGTAACTTCTTTTGCAGGGGATGAATGTG  
GCGCCTTCGGGTGCCATTGACCGTACCCTGCGAATAAGTCTCGGCTAACTACGTGCCAGC  
AGCCGCGGTAAAACGTAGGAGGCAAGCGTTATCCGGATTCAGTGGGCGTAAAGCGCGTGC  
AGGCGGTTTCGGTAAGTTGGGCGTGAAATCTCCCGGCTCAACTGGGAGAGGTGCTTCAATA  
CTACCGGGCTAGAGAGCAGTAGAGGAAGATGGAATTCCTGGTGTAGTGGTGAAATGCGTA  
GATATCGGGAGGAACACCAGTGGCGAAAGCGGCCTTCTGGACTGTTTCTGACACTCATAT  
GCGAAAGCTAGGGTAGCAAACGGGATTAGAAACCCCGTAGTCC

>Otu11151

CCAGCCTACGGGGTGCTCCAGTGGGGAATATTGGACAATGGGCGCAAGCCTGATCCAGCC  
ATGCCGCGTGTTGATGAAGGCCTTAGGGTTGTAAAGCACTTTTCGCCGCTGAAGATAATG  
ACGGTAACCGGAGAAGAAGCCCCGGCTAACTTCGTGCCAGCAGCCGCGGTAAATACGAAGG  
GGGCTAGCGTTGTTTCGGAATTACTGGGCGTAAAGCGCACGTAGGCGGACTTTTAAGTCAG  
GGGTGAAATCCCGGGGCTCAACCCCGGAAGTCCCTTGATACTGGAAGTCTTGAGTTCGA  
GAGAGGTGAGTGGAATTCGAGTGTAGAGGTGAAATTCGTAGATATTTCGGAAGAACACCA  
GTGGCGAAGGCGGCTCACTGGCTCGATACTGACGCTGAGGTGCGAAAGCGTGGGGAGCAA  
ACAGGATTAGATACCCTAGTAGTCC

>Otu11152

CCAGCCTACGGGGGGCAGCAGTAGGGAATTTTCCACAATGGGCGAAAGCCTGATGGAGCA  
ACGCCGCGTGACAGGATGAAGGCCTTCGGGTGTAAAGTCTTTTATCTGTGACGAATATG  
ACGGTAGCAGATGAATAAGGATCGGCTAACTCCGTGCCAGCAGCCGCGGTCATACGGAGG  
ATCCAAGCGTTATCCGGAATTACTGGGCGTAAAGAGTTGCGTAGGTGGCAGAGTAAGTCA  
GTAGTGAAAGCGTGCGGCTCAACCGCATATCCATTACTGAAACTGCTCAGCTAGAGGACG  
AGAGAGGTACCTGGAATTCCTAGTGTAGGAGTGAAATCCGTAGATATTAGGAGGAACACC  
GATGGCGTAGGCAGGGTGCTGGCTCGTTCTGACACTAAGGCACGAAAGCGTGGGTAGCG

AACGGGATTAGATACCCGAGTAGTCC

>Otu11155

CAGCCTATGGGTTGCTGCAGTCGGGAATCTTCCGCAATGGGCGAAAGCCTGACGGAGCGA  
CGCTGCGTGCGGGAAGAAGGCCTTCGGGTTGTAAACCGCTGTCAGGGGTTATGAAATCCA  
TCGGCAGCAATGCCGGTGGTCGACAAAGGCCCCAGAGGAAGCCATGGCTAACTCCGTGCC  
AGCAGCCGCGGTAATACGGAGATGGCAAGCGTTGTTTCGGAATCACTGGGCGTAAAGCGCA  
TGTAGGCGGTGAGGCAAGTTGGGTGTGGAAGCGCTCGGCTCAACCGGGCAATTGCGCCCA  
AAACTGCCGGACTGGAGTGCGGTAGGGGAGAGTGGAACCTCCTGGTGGAGCGGTGAAATGC  
GTAGATATCAGGAGGAACGCCGGCGGTGAAGACGACTCTCTGGGCCGTCACTGACGCTGA  
GGTGCGAAAGCCAGGGGAGCAAACGGGATTAGAGACCCTCGTAGTCC

>Otu11156

CCAGCCTACGGGTTGCAGCAGTGGGGAATCTTGGACAATGGGCGAAAGCCCGATCCAGCA  
ATATGGCGTGAGTGCAGAAGGGCAATGCCGCTCGTAAAGCTCTTTCGTGAGTGCGCGAT  
CATGACAGGACTCGAGGAAGAAGCCCCGGCTAACTCCGTGCCAGCAGCCGCGGTAATACG  
TAGGGGGCGAGCGTTGTTTCGGAATTACTGGGCGTAAAGGGCGTGTAGGCGGTGTGGTAAG  
TTGGGCGTGAAATCCCCGGGCTTAACCCGGGGGGCGGTTCAAGACTGCCATGCTAGGGT  
GCGGGAGAGGGCAGTGAATTCCCGGTGTAGCGGTGAAATGCGTAGATATCGGGAGGAAC  
ACCTGCGGCGAAGGCGGCTGCCTGGACCGTAACCGACGCTGAGGCGCGAAAGCTAGGGGA  
GCAAACAGGATTAGAAACCCCTGTAGTCC

>Otu11157

CCAGCCTATGGGTGGCAGCAGTCGAGAATCTTCCGCAATGGGGGAAACCTGACGGAGCG  
ACGCCGCGTGAGGATGAAGTTCTTCGGAATGTAACTCCTTTTGCCAGGGACGAAGTCT  
ATTGACGGTACCTGGAGAATAAGAAGTTGCTAACTCGTGCCAGCAGCAGCGGTAATACG  
AGTGCTTCAAGCGTTATCCGGAATCATTGGGCGTAAAGGGTGTGTGCGGCGCGATGTTAG  
TCTTCCGTAAAAATCTTCGGCTCAACCGGGGGCTCGCGGTAGAAACGGCATTGCTAGAGG  
ACGGGAAAGGTTTCTGGAACCTCATGGTGTAGCGGTGAAATGCGTTGATATCATGGGGAAC  
ACCAAAGCGAAGGCAAGAACTGGCCCCGCTCCTGACGCTCTAACACGAAAGCGTGGGT  
GCGAATGGGATTAGATACCCCTCGTAGTCC

>Otu11162

CCAGCCTACGGGGGGCAGCAGTAGGGAATATTGGGCAATGGGCGCAAGCCTGACCCAGCA  
ACGCCGCGTGAGGATGAAGTCCTTCGGGACATAAACTCCTTTTGGGGGGGACGAATAAA  
ATGACGGTACCCCTTGAATAAGCCTCGGCCAACTCCGTGCCAGCAGCCGCGGTAATACGG  
GGGAGGCAAGCGTTGTTTCGGAATTACTGGGTGTAAAGGGCATGTAGGCGGGTCACTAAGT  
CATTCGTGTAATCTCTGGGCTTAACCCAGAGGCTGCGATTGATACTGGCGATCTTGAGTG  
GGGGAGAGGAAATCGGAATACCCGGTGTAGCGGTGGAATGCGTAGATATCGGGTAGAACA  
CCAGTAGCGAAGGCGGATTTCTGGACCCTAACTGACGCTGAGGTGCGAAAGCGTGGGTAG  
CAAACAGGATTAGAGACCCGAGTAGTCC

>Otu11177

CCAGCCTACGGGTGGCACCAGTCGAGAATCTTTCGCAATGGGCGCAAGCCTGACGAAGCG  
ACGCCGTGTGAGCGAAGAAGGCCTTCGGGTTGTAAAGCTCTTTCGCTAGGGAACAAGAAA  
GGTGTATGAACAATACATCGATTTGATGGTACTTGGTAAAGAAGCACCGGCTAACTCCGT  
GCCAGCAGCTGCGGTAATACGGAGGGTGCAAGCATTGATCGGAATTACTGGGCGTAAAGG  
GTGCGTAGGCGGATTGTTAAGTCAGGTGTGAAATTCCGCGGCTCAACTGCGGAGCTGCAT  
TTGAAACTGGCAATCTAGAGCATAGATAGGGAAAACGGAATTCCACGTGTAGCGGTGAAA  
TGCGTAGATATGTGGAAGAACACCAGTGGTGAAGACGGTTTCTGGGCTATGGCTGACGC  
TGAGGCACGAAAGCTAGGGGAGCAAACAGGATTAGAAACCCAGTAGTCC

>Otu11181

CCAGCCTATGGGTGCGACCAGGCCGGCAGCTCGTTTTCCAGCAGTCTGCCTATGACGTTG  
GGCGGCGGGGCGACCTTCAATACGGCCGGCTACGCCGTGACTCTCTCCGGTTCCCTTTCC  
GGTCCCAGGACCTTACCAAGATCGGCAGCGGCTCGTTGACCTTGGCAGCTACGGACACG  
TTCAGCGGCACTACGCTGATCGGCGGCGGCACGCTCGCGCTGGGCAGTCCGCTGGCCTTG  
CAGAATAGCACGCTGGACGGCAGCGGCAGCGGGGTTTTGAGTTTCGGATCGCTGACCGCG  
GCCACCTTCGGCGGCCTGACCGGCCCGGCACGCTCAGCCTGAGCAATACCGCGTCCGCC  
GCCGTGGCCCTCAGTGTGGGCAACAACAACGCCAACACCACGTTCTCCGGCATGATTAGA  
AACCCTTGTAAGTCC

>Otu11183

CCAGCCTATGGGTGCGCTGCAGTAACGAATATTCCGCAATGGACGAAAGTCTGACGGAGCG  
ACGCCGCGTGTTGGGATGAAGTCCTTCGGGATGTAAACCACTGTCAGGGGCTACCAAGTGA

GCGCGCCTAATATGCGCGCAAGCTGAGGAGCCCCAGAGGAAGCCACGGCTAACTTCGTGC  
CAGCAGCCGCGGTAAAGACGAAGGTGGCAAGCGTTGTTTCGGAATCACTGGGCTTAAAGAGC  
ACGTAGGCGGCTTACCAAGTACTTTGTGAAATCCCTCGGCTCAACCGAGGAATTGCTTGG  
TAAACTGGTAGGCTTGAGGCAGGTAAGGGCGCGCGGAACCTTGGTGGAGCGGTGAAATG  
CGTAGATATCAAGAGGAACGCCGGCGGTGAAGACGGCGCGCTAGGCCTGTCCTGACGCTG  
AGGTGCGAAAGCCAGGGGAGCAAACGGGATTAGAAACCCAGTAGTCC

>Otu11205

CCAGCCTACGGGGTGCAACAGTGGGGAATTTTCCTCAATGAGCGAAAGCCTGAAGGAGCG  
ACGCCGCGTGGGGGATGAAGGGCTTCGGCTCGTAAACCCCTGTCATTTGCGAACAAACCT  
TACGATCTAACACATCGTGAGCTGATTGTAGCGAAAGAGGAAGGGACGGCTAACTCTGTG  
CCAGCAGCCGCGGTAATACAGAGGTCCCAAGCGTTGTTTCGGATTCACTGGGCGTAAAGGG  
TGCGTAGGTGGCCGGGTAAGTTTGATGTGAAATCTCCGAGCTTAACTCGGAAACTGCATT  
GAATACTATCCGGCTCGAGGGTTGGAGGGGGACTGGAATTCTCGGTGTAGCAGTGAAATG  
CGTAGATATCGAGAGGAACACCAGTGGCGAAGGCGAGTCCCTGGACAACCTCCTGACACTG  
AGGCACGAAAGCTAGGGGAGCAAACAGGATTAGAAACCCGTGTAGTCC

>Otu11222

CCAGCCTATGGGGCGCAGCAGTGGGGAATTTTGACAATGGGGGCAACCCTGATCCAGCC  
ATGCCGCGTGAATGAAGAAGGCCTTAGGGTTGTAAAGTTCTTTTGTACGGGAGCAAATTG  
CGTGGAGTAATATCTATGTAGATGAGAGTACCGTAAGAATAAGCACCGGCTAACTACGT  
GCCAGCAGCCGCGGTAATACGTAGGGTGCGAGCGTTAATCGGAATTACTGGGCGTAAAGG  
GTGCGCAGGCGGATATACAAGTTAGGTGTGAAATTCCTGGGCTTAACCTAGGAATGGCAT  
TTAAGACTGTATGTCTAGAGTTTATGAGAGGGTGGTAGAATTCGAGTGTAGCAGTGAAA  
TGCGTAGAGATTCGGAGGAATACCTGTGGCGAAGGCGGCCACCTGGGATAGAACTGACGC  
TGAGGCACGAAAGCGTGGGGAGCAAACAGGATTAGAAACCCGCGTAGTCC

>Otu11227

CCAACCTATGGGGGGCAGCAGTGGGGAATATTGGGCAATGGGCGCAAGCCTGACCCAGCC  
ATGCCGCGTGAATGAAGAAGGCCTTCGGGTCGTAAAGCTCTGTGGGGAGGGACGAACAAG  
CACCTGGCTAACATCCAGGGGGCCCTGACGGTACCTCCTTAGCAAGCACCGGCTAACTCTG  
TGCCAGCAGCCGCGGTAATACAGAGGGTGCAAACGTTGCTCGGAATCATTGGGCGTAAAG  
CGCACGTAGGCGGTCCGATAAGTTCGGGTGTGAAAGCCCTCGGCTCAACCGAGGAAGTGCA  
TTCGATACTGTGAGACTTGAGTATGGAAGAGGGTTCGCGGAATTCGCGGTGTAGAGGTGAA  
ATTCTGTAGATATCGGGAGGAACACCAGTGGCGAAGGCGGCGACCTGGGCAATACTGACG  
CTGAGGTGCGAAAGCGTGGGGAGCAAACAGGATTAGAAACCCGAGTAGTCC

>Otu11229

CCAGCCTATGGGTGGCACCAGACGAGAATATTCCGCAATGGACGAAAGTCTGACGGAGCG  
ACGCCGCGTGAATGAAGTGCCTTGGTACGTAAACATCTTTTATCGGGGACGAAGTTT  
ATTGACGGTACCCGATGAATAAGGGGCTCCTAACTCTGTGCCAGCAGGAGCGGTAATACA  
GAGGCCCAAGCATTACCCGGAATCACTGGGCGTAAAGGGTGTCTAGGCGGCCATATTAG  
TCTCTCGTTAAATCCGTGGGCTCAACCTGCGGTCTGCGAGGGAAACGGTATGGCTCGAGG  
GCGTAAGAGGTGCACGGAACCTCATGGTGGAGGGGTGAAATCCGTTGATATCATGGGGAAC  
ACCAAAGGCGAAGGCACTCTATTGGCGCGTTCTTGACGCTCACACACGAAAGCCAGGGTA  
GCGAACAGGATTAGAGACCCTAGTAGTCC

>Otu11230

CCAGCCTATGGGTGGCTGCAGTTCGGAATATTTCGCAATGGGCGAAAGCCTGACCGAGCG  
ACGCCGCGTGGAGGAAGGGCCCTCTGGGTCGTATACTCCTGTCAAAGGTTACCAAGTCAT  
TCTGGATGAACAATCCGGGATGTTGAGTAAGGCTTGAGAGGAAGCCCCGCTAATCACGT  
GCCAGCAGCGGCGGTAATACGTGAGGGGCAAACGTTGTTTCGGTGTCACTGGGCTTAAAGG  
GCGCGTAGGTGGCTATGCAAGTAAGGTGTGAAAGCCCTCGGCTTATCCGAGGAACCGCGC  
CTTAAACTGCATAGCTTGAGGACCAGAGAGGTGGGAAGAACCCTAGGTGTAGCGGTGAAA  
TGCGCAGATATCTAGGGGAAGGCCGGAGGCGAAGGCGTCCCACTGGCTGGTTTCTGACAC  
TGAGGCGCGAAAGCGTGGGGAGCAAACAGGATTAGAAACCCCTGTAGTCC

>Otu11232

CCAGCCTACGGGTCGCTGCAGTGAGGAATTTCCACAATGGGCGAAAGCCTGATGGAGCA  
ACGCCGCGTGCAGGATGAAGGCCTTCGGGTCGTAAACTGCTTTTATGTATGACGATTATG  
ACGGTAGTACATGAATAAGGATCGGCTAACTCCGTGCCAGCAGCCGCGGTACATACGGAGG  
ATCCAAGCGTTATCCGGAATTACTGGGCGTAAAGAGTTGCGTAGGTGGTATAGTAAGCAG  
GGCATGAAATCGTGTGGCTCAACCATACAGACATGTTCTGAACTGCTAAGCTTGAGGACG  
AGAGAGGTAACCTGGAATTCCTAGTGTAGGAGTGAAACCCGTAGATATTAGGAGGAACACC

GATGGCGTAGGCAGGTTACTAGCTCGTTCTTGACACTCAGGCACGAAAGCGTAGGGAGCA  
AACGGGATTAGATACCCGTGTAGTCA  
>Otu11234  
CCAGCCTATGGGTGCTCCAGTGGGGAATATTGGACAATGGGCGAAAGCCTGATCCAGCAA  
TGCCGCGTGTGTGAAGAAGGCCTTCGGGTTGTAAAGCACTTTCAGCGGGGAGGAAAGCCT  
TAGGGTTAATAACCCTGAGGGATGACGTTACCCGCAGAAGAAGCACCGGCTAACTCTGTG  
CCAGCAGCCGCGGTAATACAGAGGGTGCAAGCGTTAATCGGAATTACTGGGCGTAAAGCG  
CTCGTAGGCGGGTGCCCTAAGTCGATTGTGAAAGCCCTGGGCTTAACCTGGGAAGTGCAGT  
CGATACTGGGTATCTAGAGTATGGTAGAGGATAGTGGAATTCCTGGTGTAGCAGTGAAAT  
GCGTAGATATCGGGAGGAACACCAGTGGCGAAGGCGACTTCTGGACCAATACTGACGCT  
GAGGAGCGAAAGCGTGGGGAGCAAACAGGATTAGATACCCCCGTAGTCC  
>Otu11236  
CCAGCCTACGGGGCGCACCAAGTGGGGAATATTGGACAATGGGGGCAACCCTGATCCAGCA  
ATGCCGCGTATGTGAAGAAGGCCTTCGGGTTGTAAAGCACTTTAGGCTGGGAAGAAGGTA  
TCTAGTTTAAAGAGATAAGATATTTGACTGTACCGGCAGAATAAGCACCGGCTAACTCTGT  
GCCAGCAGCCGCGGTAATACAGAGGGTGCGAGCGTTAATCGGAATTACTGGGCGTAAAGG  
GCGCGTAGGTGTTATGTAAGATTGATGTGAAATCCCTGGGCTTAACCTAGGAAGTGCCT  
CGATGACTGCATAGCTGGAGTACTGTAGAGGGTAGTAGAATTTCCGGTGTAGCGGTGAAA  
TGCGTAGAGATCGGAAGGAATACCAGTGGCGAAGGCGGTACCTGGACAGATACTGACAC  
TGAGGCGCGAAAGCGTGGGGAGCAAACAGGATTAGAAACCCTTGTAGTCC  
>Otu11239  
CCAGCCTACGGGATGCAGCAGTTAGGAATCTTGGACAATGGGCGAAAGCCTGATCCAGCC  
ATGCCGCGTGAGTGATGAAGGCCTTCGGGTTGTAAAGCTCTTTAGCCGACGAATATAATG  
ACTGTAGTCGGAGAATAAGCCCCGGCTAACTTCGTGCCAGCAGCCGCGGTAATACGAAGG  
GGGCGAGCGTTGTTCCGAATCACTGGGCGTAAAGCGTGCGTAGGCGGCGATAAAAGTTAG  
AAGTGAAAGCCCAGGGCTCAACCTTGGAATTGCTTTTAAACTAGATTGCTAGAATTCGG  
GAGAGGATAGCGGAATTGTCACTGTAGCAGTGAAATGCGTAGATATTGACAGGAACACCA  
GTGGCGTAAGCGGTATCTGGACCGACATTGACGCTGAGGCACGAAAGCTAGGGGAGCAA  
ACAGGATTAGAAACCCGCGTAGTCC  
>Otu11249  
CCAGCCTACGGGTGGCAGCAGTGGGGAATCTTGACAATGGGCGAAAGCCTGATGCAGCA  
ACGCCGCGTGGGGGATGAAGCTTTTCGGAGTGTAACCCCTTTTCGACCCGGAAGAAAGCC  
CGCAAGGGTTTGACGGTACCTGCAGAAGAAGCCCCGGCCAACCTACGTGCCAGCAGCCGCG  
GTAATACGTAGGGGGCAAGCGTTGTCCGGACTTATTGGGCGTAAAGAGCTCGTAGGCGGC  
TTGGCAAGTCGGATGTGAAACCTCCAGGCTTAACCTGGAGTCGCCATTCGATACTGCCAT  
GGCTAGAGTTTGGTAGGGGACCACGAATTCCTGGTGTAGCGGTGAAATGCGCAGATATC  
AGGAGGAACACCAGCGGCGAAGGCGGTGGTCTGGGCCAATACTGACGCTGAGGAGCGAAA  
GCGTGGGGAGCGAACAGGATTAGAAACCCCCGTAGTCC  
>Otu11254  
CCAGCCTATGGGGGGCTGCAGTCGAGAATCTTCCACAATGGACGAAAGTCTGATGGAGCG  
ACGCCGCGTGATTGATGAAGTCCCTCTGGGACGTAAAAATCTTTTATGAGCTACTAAGTT  
TATTGAAGAGCTCATGAATAGGGGGTTGCTAAACTCGTGCCAACAGCAGCGGTAATACGA  
GTGCCCCAAGCGTTATCCGGAATTATTGGGCGTAAAGGGTGTGTAGGTGGTTGTGTTAGT  
CTTCCGTCAAAACCTCGGGCTCAACCCGAGATCTGCGAGAGAAACGGCACAACCTAGAGGA  
TGCGAGGGGTGAATGGAAGTCAAGAGTAGGGGTGAAATCCGTTGATATCATGGGGAAACA  
CCAAAAGCGAAGGCAGTTCACTGGCGCATTCCTGACACTGAAACACGAAAGCGTGGGTAG  
CGAATGGGATTAGATACCCCTGTAGTCC  
>Otu11265  
CCAGCCTATGGGAGGCAGCAGTCGAGGATCTTCGGCAATGAGCGCAAGCTTGACCGAGCG  
ACGCCGCGTGCGGGATGAAGGCTTTCGGGTTGTAAACCGCCGTCGGAGTGGAGGAAATTC  
CATAGGGTACTCTTTATGGATTGACCTATACTCAGAGGAAGGACGGGCTAAGTACGTGCC  
AGCAGCCGCGGTAATACGTACCGTCCAAACGTTATTCCGATTTACTGGGCTTAAAGGGTG  
CGTAGGCGGCTCAGAAAGTAGGGTGTGAAAGCCCTCGGCTTAACCGAGGAATTGCGCCCT  
AAACTACTAAGCTTGAGGAACGCAGAGGTAAGCGGAACCTACGGTGGAGCGGTGAAATGC  
GTTGATATCGTAAGGAACACCAGGAGCGAAAGCGGCTTACTGGGCGTTTTCTGACGCTGA  
TGCACGAAAGCTAGGGGAGCGAACGGGATTAGATACCCCTTGTAGTCC  
>Otu11274  
CCAGCCTACGGGGGGCACCAAGTGGGGAATTTTGGACAATGGGCGCAAGCCTGATCCAGCC

ATGCCGCGTGAGTGAAGAAGGCCTTTGGGTTGTAAAGCTCTTTCGGTTGGGAAGAAGGGA  
GTAGTTGCTAATACCAACTATTTTTGACGGTACCAGCATAAGAAGCACCGGCTAATTCCG  
TGCCAGCAGCCGCGGTAATACGGGAGGTGCAAGCGTTGTTTCGGAGTGAAGTGGGCGTAAAG  
CGCACGTAGGTGGGCTTGTAAAGTCGAATGTGAAATCCCTGGGCTTAACCTGGGAAGTGA  
TCCGAAACTACAAGTCTTGAATGCTTCAGAGGTTGGTAGAATTCCAGGTGTAGGAGTGAA  
ATCCGTAGATATCTGGAGGAATACCGGAGGCGAAGGCGGCCAACTGGGAATGCATTGACA  
CTGAGGTGCGAAAGCGTGGGGAGCAAAAAGGATTAGATACCCCCGTAGTCC

>Otu11277

CCAGCCTACGGGTGGCAGCAGTGGGGAATCTTGCACAATGGGCGAAAGCCTGATGCAGCA  
ATGCCGCGTGAGTAATGAAGGCCTTCGGGTTGTAAATCTCTGTCGGCTGGGACAAACGAG  
CGCATATCTAATAGGTATGCGAAGTGATGGTACCAGCAAAGGAAGAGGCGGCTAACTCTG  
TGCCAGCAGCCGCGGTAATACAGAGGCCTCGAGCGTTGTTTCGGAATTACTGGGCGTAAAG  
GGAATGTAGGTGGTGTATGTAAAGTCAGATGTGAAAGCCCTGGGCTTAACCCGGAAGTGCA  
TTTGATACTGCATCGCTAGAGTGCGAGAGAGGAAAGTGGAATTTCCAGTGTAGGAGTGAA  
ATCCGTAGATATTGGAAGGAATACCGATGGCGAAGGCAACTTTCTGGCTCGTAACTGACA  
CTGAGATTGCGAAAGCGTGGGTAGCAAACAGGATTAGATACCCGCGTAGTCC

>Otu11279

CCAGCCTACGGGTGGCAGCAGTGGGGAATCTTGCACAATGGGGGAAACCCTGATGCAGCG  
ACGCCGCGTGAGCGATGAAGCCCTTCGGGTTGTAAAGCTCTTTCGGCAGGGACGATAATG  
ACGGTACCTGCAGAAGCAGCTGCGGCTAACTACGTGCCAGCAGCCGCGTAATACGTAGG  
CAGCAAGCGTTGTTTCGGAGTTACTGGGCGTAAAGGGTGCGTAGGCGGCTCGATAAGTATG  
GTGTGAAATCTCCCGGCTTAACCTGGGAGGGTGCGCTATAGACTGCCGGGCTAGAGGGTGG  
GAGAGGAAAGTGGAATTCCTGGTGTAGCGGTGAAATGCGTAGATATCCGTAGGAACATCC  
GAGGCGAAAGCGGCGCACTGGACCATAACTGACGCTGAGGCGCGAAAGCTAGGGGAGCAA  
ACAGGATTAGAGACCCGAGTAGTCC

>Otu11281

CCAGCCTATGGGGGGCTGCAGTGGGGAATCTTGCACAATGGACGAAAGTCTGATGCAGCA  
ACGCCGCGTGGGGGATGAAGCTTCTCGGAGTGTAACCCCTTTTCGACCCGGACGAATGCC  
CGCAAGGGTTTGACGGTACGGGTATAAGAAGCCCCGGCTAACTACGTGCCAGCAGCCGCG  
GTAATACGTAGGGGGCCAGCGTTGCTCGGAATTACTGGGCGTAAAGGGTCTGTAGGCGGT  
GCGGCAAGTCGGATGTGAAATCTCTGGGCTTAACCCAGAGGCTGCTTCCGAAACTGCCGC  
GCTAGAGGATGAGAGAGGCGAGTGGAATTGCGGGTGTAAGCGGTGAAATGCGTAGATATCT  
GCAGGAACACCCGTGGCGAAAGCGGCGCACTGGACCACAACCTGACGCTGAGGAACGAAAG  
CTAGGGGAGCAAACAGGATTAGAGACCCCGGTAGTCC

>Otu11291

CCAGCCTACGGGTGCTCCAGGTAATCTTTCAGTAATGAATGAACGACATTGACCCAATGC  
CTATGGTTTTTGAATGAGCTAGAGAACTACTCTGTATTTCATTGGTTCTCACTTGTTTCGTG  
GCTGAAGACCCCTTTTAATGTCATGAAGCCGCACACCGCGTTTGACCAAGAGGCCGTGCTC  
AATTTTGAGCGTAGTCTCTCCGCAGACAAAGCAAGAAGCGCTTCTTAAGAGATCATATGT  
TTCAGTGAAGTCCCCAAATATTGAATTTTCGTGAGGCGCTAGTCCTAGTGGAATATTTTTT  
TGATAGAATAGCGGAGACATCTTGGCTTACTTCAGTGTACCATAATTGAAAGATATAAAA  
CACTGATAACCTGATATCGAAGGCTGTTGCTCGTATATCGCGCCAGAACCAGACATTC  
TGAGCTGCCTGTGCAGGAACAATATTTTCGATTAGAAACCCTCGTAGTCC

>Otu11293

CCAGCCTATGGGTGGCTCCAGTGGGGAATATTGCGCAATGGACGAAAGTCTGACGCAGTA  
ACGCCGCGTGAGGGAGGAAGACCTTCGGGTTGTAAACCTCTTTTGGGTAGGACGAGTGAG  
GACGGTACTATCAGAATAAGTCTCGGCTAACTACGTGCCAGCAGCCGCGGTAAGACGTAG  
GAGGCGAGCGTTATCCGATTCACTGGGCGTAAAGGGCATGTAGGCGGTTAGATAAGTCG  
TGTGTTAAAGCCCCGGCTCAACTGGGGGAGGTCATGCGAGACTATTTGACTTGAGGGCA  
GCAGAGGAGCATGGAACCTCCCGGTGTAGTGGTGGAAATGCGTAGATATCGGGAAGAACC  
AGTGGCGAAGGCGGTGCCCTGGGCTGCAACTGACGCTGAAATGCTAAAGTGTGGGGAGCA  
AACGGGATTAGAGACCCTAGTAGTCC

>Otu11310

CAGCCTACGGGGCGCAGCAGTGGGGAATATTGGACAATGGGCGCAAGCCTGATCCAGCCA  
TGCCGCGTGAGTGATGAAGGCCTTAGGGTTGTAAAGCTCTTTCGCTAGGGACGATGATGA  
CGGTACCCGCGAGAATAAGCCCCGGCTAACTTCGTGCCAGCAGCCGCGGTAAGACGAAGGG  
GGCTAGCGTTGTTTCGGAATTACTGGGCGTAAAGCGTGTGTAGGTGGTTGTCATAGTCAGG  
TGTGAAAGCCTTGAGCTCAACTCAAGAAATGCACTTGATACTGGGCGACTAGAGGACCGG



AGAGGATAGTGGAATTCACAGTGTAGTGGTGAAATACGTAGAGATTGGGAAGAACACCAG  
TGGCGAAGGCGGCTATCTGGACGGTTTCTGACACTAAGACACGAAAGCGTGGGGAGCAAA  
CAGGATTAGATACCCGAGTAGTCC

>Otu11320

CCAGCCTACGGGGTGCACCAGTCGAGAATCTTCCACAATGGACGAAAGTCTGATGGAGCG  
ACGCCGCGTGATTGATGAAGCTTTTCGGAGTGTAAGATCTTTTATGAGGGAAGAAGTTT  
ATTGACGGTACCTCATGAATAAGGGGCTCCTAATCTCGTGCCAGCAGGAGCGGTAATACG  
AGAGCCCCGAGCGTTATCCGGAATTATTGGGCGTAAAGGGTGCGTAGACGGTTGTGCTAG  
TCGATTGTTAAAACCTGGGGCTTAACCCAGATCTGCGATCGAAACGGCACGACTAGAGA  
GTGTGAGAGGTATAGGGAACCTCATGGTGTAGGGGTGAAATCCGTTGATATCATGGGGAAC  
ACCAAAGCGAAGGCACTATACTGGCACACATCTGACGTTCAAGCACGAAAGCGTGGGTA  
GCGAATGGGATTAGAGACCCTTGTAGTCC

>Otu11321

CCAGCCTACGGGTGGCAGCAGTGGGGAATATTGGACAATGGGCGCAAGCCTGATCCAGCC  
ATGCCGCGTGATGATGAAGGCCTTAGGGTTGTAAATCCTTTTCGACGGGGAAGATAATG  
ACGGTACCTGCAGAATAAGCCCCGGCTAACTTCGTGCCAGCAGCCGCGGTAATACGAAGG  
GGGCTAGCGTTGCTCGGAATGACTGGGCGTAAAGGGCGCGTAGGCGGCCACACAGTCAG  
ATGTGAAATTCTGGGCTCAACCTGGGGACTGCATTTGATACGTGTGAGCTTGAGTGGAG  
AAGAGGGTTGTGGAATTTCCAGTGTAGAGGTGAAATTCGTAGATATTGAAAGAACACCG  
GTGGCGAAGGCGGCAACCTGGTCTTCAACTGACGCTGAGGCGCGAAAGCGTGGGGAGCAA  
ACAGGATTAGATACCCCTTGTAGTCC

>Otu11324

CCAGCCTACGGGTTGCAGCAGTGCGGAATATTGGACAATGTGCGAAAGCGTGATCTAGTA  
ATATCTCGTCTGGGAAAGAAGGTCCATGAGACTGTAAACCAAGTGTGAGCAATTAAGGAT  
AATGACAATAATATCTGCTTGAAAGAAGTCTGGCTAAACCCTGTGCCAGCCGCCGCGGT  
AATACAGGGAGGGCGAGCGTTATTCATCGTTACTGGGCGTAAAGGGTACGTAGGTGGCTA  
GTTAAATTAATGTGAAATGCTAGAGCTAAGCTTTAGAAAGGGCATATTAATATTGACTTG  
AGCTAAGAGTTAAATTGAGTTTAAAGTAATACTAGAAGGAAAGGTAAAAATTTTACGATCT  
CTAGTAGAACACCGGTGGTGAACCTTATTTCAAATTTAACTGACACTGAGGTACGAAG  
GAATAGGGAGCAAACAGGATTAGAAACCCGAGTAGTCC

>Otu11326

CCAGCCTATGGGTTGCTGCAGTGAGGGATATTGCGCAATGGGCGAAAGCCTGACGCAGCG  
ACACCGCGTGAGGATGACGGCCTTAGGGTTGTAACTTCTGTTAAGTGGGAAGAAAGTG  
ACGGTCTTAATACGACCGTAAGATGACGGTACCCTAGAGAAAGCACCGGCTAACTTCGT  
GCCAGCAGCCGCGGTAAGACGAGGGGTGCGAACGTCATTCGGAATGATTGGGCGTAAAGG  
GTGCGTAGGCGGCTTGTTAAGTCAACTGTAAATTTCTCAGCCTAACTGGGAGTATGCGG  
TAGAACTGGCGAGCTTGAGGATGGAAGAGAGAAGTGGAATTTCTCGGAGTAGCGGTAAAA  
TGCGTAGATCTCGAGAGGAACACCGATTGCGAAGGCAGCTTCTTAGTCCATATCTGACGC  
TGAGGCACGAAAGCTGGGGAGCAAACAGGATTAGAAACCCCTTGTAGTCC

>Otu11341

CCAGCCTATGGGAGGCTCCAGTGGGGAATATTGCACAATGGGCGCAAGCCTGATGCAGCG  
ACGCCGCGTGAGGATGAAGGTTTTTCGGATTGTAACTCCTGTTACGTGGGAAGAAAGAC  
GCTTACCTAATACGTAAGTGGGATGACGGTACCCTAGAGAGAAAGCACCGGCAAACCTTCGT  
GCCAGCAGCCGCGGTAATACGAAGGGTGCGAGCGTTATTCGGAATGACTGGGCGTAAAGA  
GCGAGGAGGCGGTCTTTTAAGTCGCTTGTAAGTCCCTGGCTTACCCAGGGGAATGCGG  
GTGAACTGGAAGACTAGAGTACAAGAGAGAAGAGTGGAATTTCTTGAGTAGCGGTAAAA  
TGCGTAGATCTCAAGAGGAACACCGATTGCGAAGGCAGCTCTTTGGCTTGTAACCTGACGC  
TGGAGCGCGAAAGTGTGGGGAGCAAACAGGATTAGAAACCCCGGTAGTCC

>Otu11345

CCAGCCTATGGGATGCAGCAGAGGAGAATATTGGTCAATGAACGAAAGTTTGAACCAGCG  
TTTTGCGGAGATGATAGATTCAAAGAATCATGAAGGCTAAGGCAGCTGTAAAGTCTGTGC  
ATAGATGAAAATGATGCTTTTATGTCTGAGGAGAATCCCGGGCCAACAACGTGCCAGCAG  
CTGCGGTAAGACGTTGACGGGGGAGCGTTACTGGCCGTTACTAGGCGTAAAGTATGGCTA  
AATTGTTTAAAGAAATTATACCTCAAATCAAAGAAAAGACGAAGGCGTGATATAGTACCTT  
AATACTGGAGAAACAAGGAGGTTTGCGATGAGCATGGTCTAGAGATAAAATTCAGATAGA  
CCATAAGGATCTCCGGCGGCGCGGCGGCTTCCCACTTGTTTTCTGACGTTGAACCATTA  
AAGTACGAGTATCAATCAGGATTAGATACCCGCGTAGTCC

>Otu11350

CCAGCCTATGGGTGGCACCAGCTAAGAATCTTCCGCAATGGGCGAAAGCCTGACGGAGCG  
ATGCCGCGTGATCGATGAAGGTCGAGAGATTGTAAAGATCTTTTCCACATGAGGAATAAG  
GTTGGGAGGGAATGCCCAATCGATGACGTTAGTGTGGGAATAAGCCCCGGCTAATTACGT  
GCCAGCAGCCGCGGTAACACGTAAGGGGCGAGCGTTGTTTCGGAATTATTGGGCGTAAGG  
GCACGCAGGCGGTTATACAAGTCCGATGTGAAAGACCTGGGCTTAACCTCAGGGGCCGCGT  
TGGAAGTGTATGACTAGAATCTTGGAGGGGAGTCGGAATTCCTAGTGTAGGGGTGAAA  
TCTGTTGATATTAGGAAGAACACCGGTGGCGAAGGCGGACTCCTGGCCGAAGATTGACGC  
TGAGGTGCGAAAGCATAGGGAGCAAACAGGATTAGATACCCCTCGTAGTCC

>Otu11361

CCAGCCTATGGGTGTCAGCAGTGGGGAGTATTGCGCAATGGGCGAAAGCCTGACGCAGCA  
ACGCCGCGTGAGTGAAGAAGGCCTTCGGGTGTAAAGCTCTTTCGATGGGGGTGAAGGGC  
AGTATTACAAATAATAACTGTCTGACGGTACCTGAAGAAGAAGCACCTGCTAACTCCG  
TGCCAGCAGCAGCGGTAATACGGAGGGTGAAGCGTTGTTTCGGAATTACTGGGCGTAAAG  
CGCACGTAGGCGGATTTGTAAGTCGAGTGTAAATCCCTGGGCTTAACCCAGGATCTGCA  
TTCGAAACCGCAAACCTTGAATGCCAGAGAGGGTGGGAGAATTCCTGGTGTAGAAGTGAA  
ATTTCGTAGATATCAGGAGGAATACCTGAGGCGAAGGCGCCTGCCTGGCTGTGCATTGACG  
CTAAGAGTGCGAAAGCGTGGGGAGTAAACAGGATTAGAGACCCCTGTAGTCC

>Otu11375

CCAGCCTATGGGGGGCTCCAGTAAGGAATATTGGACAATGGGCGAAAGCCTGGTCCAGCC  
ATGCCGCGTGAGGATTAAGGTCCTCTGGATTGTAAACTCTTTTATTTGGGACGAAAAA  
AGGAAATCTTTTCCACTTGACGGTACCAGATGAATAAGCACCGGCTAACTCCGTGCCAG  
CAGCCGCGGTAATACGGAGGGTGAAGCGTTATCCGGATTTACTGGGTTTAAAGGGTGCG  
TAGGTGGGTAGGTAAAGTCAGTGGTGAAATCTCTGAGCTTAACCTCGGAACTGCCATTGAT  
ACTATTTATCTTGAATATTGTGGAGGTAAGCGGAATATGTCATGTAGCGGTGAAATGCTT  
AGATATGACATAGAACACCAATTGCGAAGGCAGCTTACTACACATATATTGACACTGAGG  
CACGAAAGCGTGGGGATCAAACGGGATTAGAAACCCCTGTAGTCC

>Otu11377

CCAGCCTATGGGTGGCTCCAGTGGGGAATATTGCACAATGGGGGAAACCCCTGATGCAGCG  
ACGCCGCGTGAGCGATGAAGCCCTTTGGGGTGTAAAGCTCTTTCGGCAGGGAAGATTATG  
ACGGTACCTGCAGAAGCAGCTGCGGCTAACTACGTGCCAGCAGCCGCGGTAATACGTAGG  
CAGCAAGCGTTGTTTCGGAATTACTGGGCGTAAAGGGTGTGTAGGCGGTTGCTTAAGTTTG  
GTGTGAAATCTCCCGGCTCAACTGGGAGGGTGCGCCGAATACTGAGTAAC TAGAGTGCGG  
GAGAGGAAAGTGGAATTCCTGGTGTAGCGGTGAAATGCGTAGATATTAGGAAGAACACCA  
GTGGCGAAGGCGGCCAACTGGCCCATACTGACGCTCATGTGCGAAAGCGTGGGGAGCAA  
ACAGGATTAGATACCCCAGTAGTCC

>Otu11378

CCAGCCTATGGGGCGCAGCAGTTGGGAATTTTGCACAATGGGCGCAAGCCTGATGCAGCA  
ACACTGCGTGAGGATGAAGGTTTTTCGGATCGTAAACTTCTTTTATCTGGGAATAATCTT  
GAAGGTACCAGATGAATAAGCACCGGCTAACTACGTGCCAGCAGCCGCGGTAATACGTAG  
GGTGCAAACGTTATCCGGATTTATTGGGCGTAAAGAGCTCGTAGGTGGACTTATAAGTTG  
GATATTAAATACTTTGGCTCAACCAAAGAAATGTATCCAAAACCTATTTGTCTTGAGGTAT  
GTAGGGGAGGATGGAACCTACGGTGTAGCAGTGAAATGCGTAGATATCGTAAGGAACGCC  
GATGGTGAAGACAGTCCTCTGGACATAACCTGACACTGAGGAGCGAAAGCGTGGGGAGCG  
AACGGGATTAGAGACCCCCGTAGTCC

>Otu11381

CCAGCCTACGGGGGGCTGCAGTGGGGAATTTTGCACAATGAGCGAAAGCTTGATGCAGCG  
ACGCCGCGTGAGGATGACGGTCTTCGGATTGTAAACTCCTGTTAAGTGGGAAAAAATGT  
CGATACCTAATACGTATCGAAGCTGATAGTACCACTAGAGAAAGCACCGGCAAACCTTCGT  
GCCAGCAGCCGCGGTAATACGAAGGGTGCTAGCGTTATTCGGAATAACTGGGCGTAAAGA  
GCGTGAAGACGGCTTTTTTAAGTCATCTGTAAATAGCCCGGCTTAACCTGGGCATCTGCGG  
GTGAAACTGAAGAGCTAGAGTGCAGGAGAGAAAGGTAGAATTCTCGGAGTAGCGGTAAAA  
TGCGTAGATCTCGAGAGGAATACCGGTTGCGAAGGCGGCCTTTTGGCCTGTTACTGACGT  
TCAAGCGCGAAGGCGTGGGGAGCAAACAGGATTAGAAACCCGAGTAGTCC

>Otu11383

CCAGCCTACGGGACGCTGCAGGGAAGCTCTGGGGCTGCTTCAGGTGAGATGTGGGGACGC  
TTTGGGTGAAGTCACCGGGGGTTCATCGCCACTCGTGACCCCATTTCCCGAAGCACGCCTT  
CCCCGGTCCCGTCACCGCAGAATCGAATGAGACGCGCGAGACGAGAGCGATTCAACGCCT  
TGATCGTCTCGTGCAATCGCCGCTTGGGGCACTGTTTCGTGCGCGGTGGCAATGGATCGA

AAATTTCGAGCAGGCCAACCTTCTTCCTCGAACGCTGCAAGCACGATTTCTTGATTGGCGG  
CCGGCAGCCGAAACCGCTTGATGATTTGCCCTTCGACCACCAATTCCCCGCCGACGGAAT  
CCCACCGCGGCACGAGTGGGGCCTCGGCCGTCGATGAATCGCGGTGTCCGTTTGAACCAT  
TAGAGACCCCAGTAGTCC

>Otu11384

CCAGCCTATGGGGGGCAGCAGTCGAGAATTTTTTACAATGGGGCGAAAGCCTGATGGAGCG  
ACGCCGCGTGGGGGATGAATGGCTTCGGCCCGTAAACCCCTGTCATTTGCGATCAACCGT  
TGTTGTTTTAAGAGATGACAACCTGATAGTAGCGAAAGAGGAAGGGACGGCTAACTCTGTG  
CCAGCAGCCGCGGTAATACAGAGGTCCCAAGCGTTGTTTCGGATTCACTGGGCGTAAAGGG  
TGCGTAGGTGGCGAAGTAAGTCGGATGTGAAATCTCCGAGCTCAACTCGGAACTGCATT  
GGAAACTACTTTGCTCGAGGGTTGGAAGGGGGACTGGAATACTTGGTGTAGCAGTGAAAT  
GCGTAGATATCGGGAGGAACACCTGTGGCGAAAGCGGCGCACTGGACCACTACTGACGCT  
GAGGCGCGAAAGCCGGGGGAGCAAACAGGATTAGATACCCCTGTAGTCC

>Otu11392

CCAGCCTATGGGATGCTGCAGCTAAGAATCTTCCGCAATGGGGGAAACCCCTGACGGAGCG  
ACGCCGCGTGATGATGAAGGCCGTAAAGTTGTAAATCCTTTTTGTGCGGTGAAGAATAAA  
TCAAGGAGTGAAAGCCTTGTTGATGACGTTAGCCGACGAATAAGCCCCGGCTAATTACG  
TGCCAGCAGCCGCGGTAATACGTATGGGGCAAGCGTTGTTTCGGATTTATTGGGCGTAAAG  
GGCGTGTAGGCGGCTCATCAAGTCTGGTGTGGAATGCAGGGCCTAACTCTGCAAATGCG  
CTGGAACCTGGTGGGCTTGAGTTCTTGAGGGGAAGCTGGAATTCAGGTGTAGGGGTGAA  
ATCTGTAGATATGCGGAAGAATACCTGTGGCGAAGGCGAGTTTCTGGTCTATAACTGACG  
CTGAAATGCGAAAGTGTGGGTAGCAAACAGGATTAGAAACCCCAGTAGTCC

>Otu11395

CCAGCCTACGGGTGGCTCCAGTCGAGAATCTTCCGCAATGGGGCGAAAGCCTGACGGAGCG  
ACGCCGCGTGATCGATGAAGTGCTTCGGCATGTAAAGATCTTTTATGAGGGACGAAGTTT  
ATTGACGGTACCTCATGAATAAAGGGTTGCTAAACTCGTGCCAGCAGCAGCGGTAATACG  
AGTGCCCTAAGCGTTATCCGGAATCATTGGGCGTAAAGGGTGTGTAGGTGGTCGCGTTAG  
TCTTCTGTTAAATTTCTTCGGCTCAACCGGGGGCATGCAGGGGAAACGGCGCGACTAGAGG  
ATGCGAGGGGGCAAATGGAACCTCATGGAGTAGGGGTGAAATCCGTTGATATCATGGGGAAC  
ACCAAAGCGAAGGCAGTTTGCTGGCGCATTCCTGACACTGAAACACGAAAGCGTGGGTA  
GCGAATGGGATTAGAAACCCCCGTAGTCC

>Otu11399

GCCAGCCTACGGGGGGCACCAGTGAGGAATATTGGTCAATAGGGGGAACCCTGAACCAGC  
CATGCCGCGTGAAAGGAAGAATGCCCTAAGGGTTGTAAACTTCTTTTGTACGGGAGTAATG  
ACAGGTACGTGTACCTGAGTGAAAGTACCGTACGAGTAAGCATCGGCTAACTCCGTGCCA  
GCAGCCGCGGTAATACGGAGGGTGCAAGCGTTATCCGGATTTACTGGGTTTAAAGGGTGT  
GTAGGCGGGCTTTTAAAGTCAGTGGTGAAATCTCCGGGCTCAACTTGGAACCTGCCATTGA  
TACTATTAGTCTCGAATTCTGTTGAGGTAGGCGGAATAAGTCATGTAGCGGTGAAATGCA  
TAGATATGACTTAGAACACCAATTGCGAAGGCAGCTTACTAAGCAGATATTGACGCTGAG  
GCACGAAAGCGTGGGGATCAAACAGGATTAGATACCCGAGTAGTCC

>Otu11403

CCAGCCTACGGGTCGCACCAGTCGAGAATTTTTTACAATGGGGGCAACCCTGATGGAGCG  
ACGCCGCGTGAGGATAAGGTCTTCGGATTGTAAACTCCTGTCATGCGAGAGCAAGGCAC  
ATCAGTTAACACCTGGTTTGTCTGATAGTATCGCAAGAGGGAGAGACGGCTAACTCTGTG  
CCAGCAGCCGCGGTAATACAGAGGTCTCAAGCGTTGTTTCGGAATCACTGGGCGTAAAGGG  
TGTGTAGGCGGTGCGTTAAGTCAGATGTGAAAGCCAGGGCTCAACCTTGGAACCTGCATC  
CGATACTGGCGCGCTAGAGAATTGGAGAGGAGTCTAGAATTCACGGTGTAGCAGTGAAAT  
GCGTGGATATCGTGAGGAATACCAAGTGCGAAGGCAGGACTCTGGACATTTTCTGACGCT  
GAGACACGAAGGCTAGGGGAGCAAACGGGATTAGAAACCCGCGTAGTCC

>Otu11409

CCAGCCTTATGGGTGGCTCCAGTCGAGAATTTTTTCTCAATGGGGCGAAAGCCTGAAGGAGC  
GACGCCGCGTGGGGGATGAATGGCTTCGGCCCGTAAACCCCTGTCATTTGTGAACAAATT  
AATCTACCCAACACGTGGATTATTGATAGTAACGGAAGAGGAAGGGACGGCTAACTCTGT  
GCCAGCAGCCGCGGTAATACAGAGGTCCCAAGCGTTGTTTCGGATTCACTGGGCGTAAAGG  
GTGCGTAGGTGGTTGGATAAGTTTGATGTGAAATCTCGGAGCTCAACTCCGAAACTGCAT  
TGAATACTATCTAGCTTGAGGATTGGAGGGGGGACTGGAATTTCTCGGTGTAGCAGTGAAA  
TGCGTAGATATCGAGAGGAACACCAAGTGCGAAGGCGAGTCCCTGGACAATACCTGACAC  
TGAGGCACGAAAGCTAGGGGAGCAAACAGGATTAGATACCCCTGTAGTCC

>Otu11418

CCAGCCTACGGGAGGCTGCAGTCGAGGATCTTCGGCAATGGGCGAAAGCCTGACCGAGCG  
ACGCCGCGTGCGGGATGAAGGCCTTCGGGTGTAAACCGCTGTCAGTGAGGAGGAAGGCT  
CCGTGAAGAGCGGGGTTTGACCTATTCGCAGAGGAAGTGTGGGCTAAGCTCGTGCCAGCA  
GCCGCGGTAAGACGAGCCACACAAACGTTATTCGGAATTACTGGGCTTAAAGGGTGCGTA  
GGCGGTGCGGAAAGTAGGGTGTGAAATCCCTCGGCTCAACCGGGGAACAGCGCTCTAAAC  
TACCGTGCTTGAGGGAGACAGAGGTAAGCGGAACCTTCGGGTGGAGCGGTGAAATGCGTTG  
ATATCCGAAGGAACACCGGTGGCGAAAGCGGCTTACTGGGTCTTCTCTGACGCTGAGGCA  
CGAAAGCTAGGGTAGCAAACGGGATTAGAAACCCTGGTAGTCC

>Otu11419

CCAGCCTATGGGAGGCTGCAGTGAGGAATTTTCGCAATGGGCGCAAGCCTGACGGAGCG  
ACGCCGCGTGAGGACGAAGTCTTTCGGGATGTAAACTCCTTTTGCCCGGAAGAACACA  
ATGACGGTACCGGGTGAATAAGCCTCGGCTAACTACGTGCCAGCAGCCGCGGTAAGACGT  
AGGAGGCAAGCGTTGTTTCGGAATTACTGGGCGTAAAGCGTCCGTAGGCGGGTCGGTAAAGT  
GGCTAGTTAAACCCGGGGCTCAACCCCGAGGGTGCTAGCCAAACTGCCAATCTGGAGGT  
CGGCAGAGGGTGATGGAATTCGCGGTGTAGCGGTGAAATGCGTAGATATCGGGAGGAACA  
CCAGTGGCGCAAGCGATCACCTGGGCTAGACCTGACGCTGAGGGACGAAAGCGTGGGGAG  
CAAACGGGATTAGAAACCCTAGTAGTCC

>Otu11433

CCAGCCTATGGGTTGCTGCAGTGTGGAATCTTGACAAATGGGCGTAAACAGCCTGATCCA  
GTTACATCTCTCAAGTGATTGACTACATTTGTCTGTAATAACTGTCTGGTTAGCTGCCTCAA  
TCATGCTTATTTGGAGGCGGTTAATATAAATAGCTCTGGGCAACTTCTGTGCCAGCAGCC  
GCGGAATACAGAGAGAGTAAGCATTATCCATCCTAACTGGGTGTAAAAGGTGCGTAGAT  
GAATATTACTTAGAAGACTAGATGATAATTGCTGTGTTGGCAGGCATTTCTAGTACCAAG  
TATTTTGAGACACACAGAAGTTGTTAGAACACATAGTGTTCAATTGTTTCAGGAAACTGTT  
GATCTTATGGAGACTACTCAGAGCGAAGGCATTCAACTTGTTGTGATCTGACGTTGAGGC  
ACGAAAGCGTGGGGAGCAAAAAGGATTAGATACCCAGTTAGTCC

>Otu11449

CCAGCCTACGGGGGGCAGCAGACGAGAATATTCCGCAATGGACGCAAGTCTGGCGGAGCG  
ACGCCGCGTGATGGATGAAGTGCTTTGGTATGTAAACATCTTTTATCGGGGACGAGTTTA  
TTGACGGTACCCGATGAATAAGGGGCTCCTAACTCTGTGCCAGCAGGAGCGGTAATACAG  
AGGCCCCAAGCATTACCCGGAATTACTGGGCGTAAAGGGTGTGTAGGCGGTCATATTAGT  
CGTTCGTTAAATCCGTGGGCTCAACCTACGGCATGCGAGCGAAACGGTATGACTGGAGGG  
CGCGAGAGGTGCACGGAACCTCATGGTGGAGGGGTGAAATCCGTTGATATCATGGGGAAACA  
CCAAGGGCGAAGGCAGTGCCTAGCGCGTTTCTGACGCTGAAACACGAAAGCCAGGGGTG  
CGAACGGGATTAGATACCCCGGTAGTCC

>Otu11455

CCAGCCTATGGGTGGCTGCAGTAGGGAATTTTTCGCAATGGGCGAAAGCCTGACGCAGCA  
ACACCGCGTGAGTGATGAAGCATCTTGGTGTGTAAACTCTGTGAGAGGGGACGAATTTT  
GACGGTACCCCTCAAAGGAAGCATCGGCTAACTACGTGCCAGCAGCCGCGGTAAGACGTAG  
GATGCGAGCGTTGTCCGGAATTATTGGGCGCAAAGAGTTCGTAGGCGGCATGTAAAGTCT  
GGTGTTAAATCCCGGAGCTCAACTCCGGTTCGGCATTTGGATACTTACAAGCTTGAGTACA  
GAAGAGGCAAAGGGAATTCCTAGTGATGAGCGGTGAAATGCGTAGATATTAGGAGGAACACC  
GGTGGCGTAAGCGCTTTGCTGGTCTGTTACTGACGCTGAGGAACGAAAGCCAGGGGAGCA  
AATGGGATTAGAAACCCGCGTAGTCC

>Otu11463

CCAGCCTACGGGATGCTCCAGTGGGGAATATTGGACAATGGAGGAAACTCTGACGCAGCG  
ACGCCGCGTGGGTGACGAAGGTCTTCGGATCGTAAAGCCCTGTCCGATGGGAAGAAAAAC  
GGAATGGCTAACATCCATACCGCTTGACGGTGCCATAAGAGGAAGCCCCGGCTAACTTCG  
TGCCAGCAGCCGCGGTAATACGAAGGGGGCAAGCGTTGTTTCGGAATCATTTGGGCGTAAAG  
CGCGTGTAGGCTGTCTATTAAGTCGGGTGTGAAATCCCTGGGCTCAACCGAGGAAGTGCA  
TTCGAAACTGATAGACTAGAAGATGGTAGAGGAAGGTGGAATTCCAAGTGTAGAGGTGAA  
ATTCGTAGATATTTGGAGGAATACCGGTGGCGAAGGCGGCCTTCTGGGCCATTCTTGACG  
CTGAGACGCGAAAGCGTGGGGAGCAAACAGGATTAGAGACCCGAGTAGTCC

>Otu11464

CCAGCCTATGGGTGGCACCAAGTGGGGAATATTTCGCAATGGGGGAAACCCTGACGCAGCG  
ACGCCGCGTGCGGGATGAAAGCCTTCGGGTGTAAACCGCTTTCACCAGGGAAGAATCCA  
GACGGTACCTGGGGAAGAAGCGCCGGCTAACTACGTGCCAGCAGCCGCGGTAATACGTAG

GGCGCAAGCGTTGTCCGGATTTATTGGGCGTAAAGAGCTCGTAGGGCGGCCTGTGCGGTCT  
GCTGTGAAATCCCGGGGCTTAACCCCGGGCTTGCAGTGGATACGGGCTGGCTGGAGGCAG  
GCAGGGGAGAACGGAATTCTCGGTGTAGCGGTGAAATGCGCAGATATCGGGAGGAACACC  
GGTGGCGAAGGCGTTCTCTGGGCCTGTTCTGACGCTGAGGGACGAAAGCTAGGGGGGCA  
AACAGGATTAGATACCCTCGTAGTCC

>Otu11466

CCAGCCTACGGGATGCTGCAGTGAGGAATATTTGGCGATGAAAAAATTTTGACATAGTA  
ATAATTCTAGAGTGAATAATAGACAGCAATATCGCTGTAAACTCTTTTGATAAAATGAA  
TAATGACTACATTTAAAGAATAAGCACTGGCTAATTCTGTGCCAGCAGCCGCGGTAATAC  
AGGGAGTGCAGACGTTATTCATATGCATTGGGTGTAAAGGATATGTAGGTTGCTTTGAAT  
GGACATTTTTTAAAAAACTAGAATAAATCTTTTAGAATTAAAATGTAACCAAAGCTATG  
AGTTTATACGAAGTTGAAAGAATTTTTTAGGCAGGGGTGAATCCATAGAGCTAAGAACG  
ACTACCAAATCGTAGTGAAAACATTCTTCTAGTATAACACTAACACTGAGATATGAAAG  
TTTAGGAATCAAACAGGATTAGAGACCCAGTAGTCA

>Otu11480

CCAGCCTACGGGTTGCACCAGTGGGGAATATTGGACAATGGGCGCAAGCCTGATCCAGCC  
ATGCCGCGTGAGTGATGAAGGCCCTAGGGTTGTAAAGCTCTTTTGTGCGGAAGATAATG  
ACGGTACCGCAAGAATAAGCCCCGGCTAACTTCGTGCCAGCAGCCGCGGTAATACGAAGG  
GGGCTAGCGTTGCTCGGAATCACTGGGCGTAAAGGGTGCGTAGGCGGGTCTTTAAGTCAG  
GGGTGAAATGCCAAGGCTCAACCTTGGAAGTGCCTTTGATACTGGAAGTCTTGAGTCCGG  
GAGAGGTGAGTGGAAGTGCAGGTGTAGAGGTGAAATTCGTAGATATTTCGGAAGAACACCA  
GTGGCGAAGGCGACACACTGGCCCGTTACTGACGCTGAGGCGCGAAAGCGTGGGGAGCAA  
ACAGGATTAGAGACCCGAGTAGTCC

>Otu11485

CCAGCCTACGGGTCGCACCAGGCACCTTGATGACGACCTTTTTACCATCGAACTTTGCTG  
CGCTCGGTACACCACCTTGCTGGTGCTCTTGTAGAGCATCTCCAGGTTCTCATAGGCCTG  
AAGTTGATAGCATCAGCGGCAAGCAAAAGATGAGAACTACCAACATTAAGCCGCTCCGGT  
CGGTCCGGCAGCGTGTCCACCTCGGCCGTAAAACCCCCGGCCTTGCGCTTTGCGGGGCGG  
TGCCCTGACGTCGTTGGCAGCAGCACCGCTTATTATCGTTTGCAAGTCGGGGCGTTTGCG  
TCGTCTAAATCCTAATTCTACGTAATTTGCCCTCGGCCTGTGAGGGCAAATTCGACTTTG  
CCCTCGGATTGGGGGTGCTGATTAGAGACCCCTGTAGTCC

>Otu11487

CCAGCCTACGGGGTGCACCAGTCGAGGATCTTCGGCAATGGGCGCAAGCCTGACCGAGCG  
ATGCCGCGTGGGCGATGAAGGCCTTCGGGTGTAAAGCCCTGTGAGAGGGAGAAAGGGG  
AAACCTTGATCTATCTCTGGAGGAAGGACGGGCTAAGTTCGTGCCAGCAGCCGCGGTAAG  
ACGAACCGTCCAAACGTTGTTGCGGAATCACTGGGCTTAAAGGGAGCGTAGGCGGGCTGCC  
AAGTCCGGGGTGAAATCCTCCAGCTTAACTGGAGAACTGCCTCGGATACTGGAAGTCTCG  
AGGAGGGTAGGGGCAAGTGGAACCGTGGGTGGAGCGGTGAAATGCGTTGATATCCATGGG  
AACTCCGGTGGCGAAGGCGACTTGCTGGACCTTTTCTGACGCTGAGGCTCGAAAGCCAGG  
GGAGCAAACGGGATTAGATACCCTAGTAGTCC

>Otu11488

CCAGCCTATGGGTGGCTCCAGTAGGGAATATTGCGCAATGGGGGAAACTCTGACGCAGCG  
ACGCCGCGTGGGTGATGAAGGCTTTTCGGGTGCTAAAGCCCTGTGCGAAGGGAAGAAAAAT  
ATTATGGCTAACATCCATAGTACTTGACGGTACCTTCAAAGGAAGCACCGGCTAACTACG  
TGCCAGCAGCCGCGGTAATACGTAGGGTGCAAGCGTTGTTGCGGAATCATTGGGCGTAAAG  
CGCGTGTAGGTGGTTAAGTAAGTCGGGTGTGAAAGCCCTCGGCTCAACCGGGGAAGTGCA  
TCCGAAACTGCTTAGCTAGAGGACGGTAGAGGAAGGTGGAATTCCTAGTGTAGAGGTGAA  
ATTCGTAGATATTAGGAGGAATACCGGCGGCGAAGGCGGCCTTCTGGGCCGTTCTTGACA  
CTGAGACGCGAAAGCGTGGGGAGCAAACAGGATTAGATACCCAGTAGTCC

>Otu11490

CCAGCCTACGGGTGGCAGCAGTAAGGAATATTGGTCAATGGGCGGAAGCCTGACCGAGCG  
ACGCCGCGTGGAGGACGAAGGCCTTCGGGTGTAAACTCCTGTGAGGGGGAGGAAGAGG  
TGGTGCAGAGCCATCTTTGACCGATCCCTGGAGGAAGCACGGGCTAAGTTCGTGCCAGCA  
GCCGCGGTAAGACGAACCGTGCGAACGTTATTCGGAATCACTGGGCTTAAAGCGCGTGTA  
GGCGGTCCGGCACGTCGAGCGTTGAAATCCCCCTGGCTCAACCAGGGAAGTGGCATCGATA  
CGACCGGACTGGAGGGGGGTAGGGGGCGCCGGAACCTTCCGGTGGAGCGGTGAAATGCGTT  
GAGATCGGAAGGAACGCCCGTGGCGAAAGCGGGCGCCTGGACCCACCTGACGCTGAGAC  
CGGAAAGCCAGGGGAGCGAACGGGATTAGATACCCCGGTAGTCC

>Otu11500

CCAGCCTATGGGGCGCTCCAGTAAGGAATATTGGTCAATGGACGCAAGTCTGAACCAGCC  
ATGCCGCGTGAGGATGAAGGCCCTCTGGGTGTAAACTTCTTTTATTTGGGAAGAAACC  
CATCCTTTCTAGGGTGGCTGACGGTACCAGATGAATAAGCACCGGCTAACTCCGTGCCAG  
CAGCCGCGGTAATACGGAGGGTGCAAGCGTTATCCGGATTCACTGGGTTTAAAGGGTGCG  
TAGGTGGGCAGGTAAGTCAGTGGTGAAATCTCTAAGCTTAACTTAGAAACTGCCGTTGAT  
ACTATCTGTCTTGAATATCGTGGAGGTGAGCGGAATATGTCATGTAGCGGTGAAATGCTT  
AGATATGACATAGAACACCAATTGCGAAGGCAGCTCGCTACACGGTTATTGACACTGAGG  
CACGAAAGCGTGGGGATCAAACAGGATTAGAGACCCGAGTAGTCC

>Otu11503

CCAGCCTATGGGATGCTCCAGTAGGGAATATTGCGCAATGGAGGAAACTCTGACGCAGCG  
ACGCCGCGTGGGTGACGAAGGCCCTTCGGGTGTAAAGCCCTGTCGGAAGGGACGAAAAAT  
GGTATGGCTAATATCCATATCACTTGACGGTACCTTTAAAGGAAGCACCGGCTAACTACG  
TGCCAGCAGCCGCGGTAATACGTAGGGTGCAAGCGTTGTTTCGGAATCATTGGGCGTAAAG  
CGCGTGTAGGTGGTGGAGCAAGTCGGACGTGAAATCCCTGGGCTTAACCGAGGAAGTGCA  
TTCGATACTGCTTAGCTAGAGGACGGTAGAGGAAGGTAGAATTCCTAGTGTAGAGGTGAA  
ATTTCGTAGATATTAGGAGGAATACCGGTGGCGAAGGCGGCCTTCTGGGCCGTTCTCTGACA  
CTGAGACGCGAAAGCGTGGGGAGCAAACAGGATTAGATACCCGAGTAGTCC

>Otu11507

CCAGCCTATGGGTGGCTGCAGTGGGGAATATTGGACAATGGGCGCAAGCCTGATCCAGCC  
ATGCCGCGTGAGTGATGAAGGCCCTAGGGTTGTAAAGCTCTTTTGTGCGGGAAGATAATG  
ACGGTACCCACAGAAGAAGCCCCGGCTAACTTCGTGCCAGCAGCCGCGGTAATACGAAGG  
GGGCTAGCGTTGTTTCGGATTTACTGGGCGTAAAGCGCACGTAGGCGGATTGTTAAGTGAG  
GGGTGAAATCCCAGGGCTCAACCCTGGAATGCCTTTCATACTGGCAATCTCGAGTCCGG  
AAGAGGTGAGTGGAATCCTAGTGTAGAGGTGGAATTCGTAGATATTAGGAAGAACACCA  
GTGGCGAAGGCGGCTCACTGGTCCGGTACTGACGCTGAGGTGCGAAAGCGTGGGGAGCAA  
ACAGGATTAGAAACCCTAGTAGTCC

>Otu11528

CCAGCCTATGGGGTGCAGCAGTGGGGAATATTGGGCAATGGGCGAAAGCCTGACCCAGCG  
ACGCCGTGTGGGCGATGAAGGCCCTTCGGGTGTAAAGCCCTGTGAGGTGGAAAGAAGGGC  
CTAGAGGTTAATACCCTTTAGGCTTTGACGGTACCACCAGAGGAAGCACCGGCTAACTCC  
GTGCCAGCAGCCGCGGTAATACGGAGGGTGCAAGCGTTGTTTCGGAATTACTGGGCGTAAA  
GGGCGCGTAGGTGTTGTGTAAAGTCAGATGTGAAATCCCGAGGCTTAACCTCGGAATGCA  
ATCTGATACTGCATGACTCGAGTACAGCAGAGGGAAACGGAATTCCTGGTGTAGAGGTGA  
AATTCGTAGATATCAGGAGGAACACCGGTGGCGAAGGCGGTTTCCTGGGCTGATACTGAC  
ACTGAGGCGCGAAAGCGTGGGGAGCAAACAGGATTAGATACCCCTGTAGTCC

>Otu11535

CCAGCCTACGGGGCGCTCCAGTCGAGGATCTTCGGCAATGGGCGCAAGCCTGACCCAGCG  
ACGCCGCGTGCGGGATGAAGGCCCTTCGGGTGTAAACCGCCGTCAGAGGGGAGGAAATGC  
CGGGAAGTAATAAATAATCGACCCGTTTGACCTATCCTCAGAGGAAGTACGGGCTAAGT  
TCGTGCCAGCAGCCGCGGTAAGACGAACCGTACGAACGTTATTTCGGAATCACTGGGCTTA  
AAGGGTGCCTAGGCGGCCCGGAAAGTTGGGTGTGAAAGCCCTCGGCTCAACCGAGGAATT  
GCGCCCAAAACTACCGGGCTCGAGGGAGACAGAGGTGAGCGGAACCTTAGGGTGGAGCGGT  
GAAATGCGTTGATATCCTAAGGAACACCAGGAGCGAAAGCGGCTCACTGGGTCTCTTCTG  
ACGCTGAGGCACGAAAGCTAGGGGAGCGAACGGGATTAGAAACCCCTGTAGTCC

>Otu11537

CCAGCCTACGGGGGGCAGCAGTAGGGAATATTGGGCAATGGGCGCAAGCCTGACCCAGCG  
ACGCCGCGTGGGTGATGAAGATCTTTGGATCGTAAACCCCTGTCAGTGGGGAAGAACCGC  
ACCAGAAGTTACTGTCTGGTGCTGACGGTACCCACAGAGGAAGCTCCGGCTAACTCCGT  
GCCAGCAGCCGCGGTAATACGGGGGGAGCGAGCGTTGTTTCGGATTCACTGGGCGTAAAGG  
GCGTGTAGGTGGGTCTTCAAGTCATATGTGAAAACCGACAGCTTAACTGTCGGCCTGCAT  
CTGAAACTGGGGACCTTGAGTACGGGAGAGGAAAGCGGAATTCCTAGTGTAGCGGTGAAA  
TGCGTAGATATCAGGAGGAACACCGGTGGCGAAGGCGGCTTTCCTGGCCCGATACTGACAC  
TGAGGCGCGAAGGCCGGGGAGCAAACAGGATTAGAGACCCAGTAGTCC

>Otu11541

CCAGCCTATGGGGGGCAGCAGCAAGGAATTTTTCGCAATGGGCGAAAGCCTGACGCAGCA  
ACGCCGCGTGAGGATGAAGGCCCTTCGGGTGTAAACTTCTTTTCTCAGGGACGAATAAT  
GACGGTACCTGGGGAATAAGCTTCGGCTAACTACGTGCCAGCAGCCGCGGTAATACGTAG

GAAGCAAGCGTTATCCGGATTTACTGGGCGTAAAGTGGGCGTAGGTGGCCTCACAAAGTCG  
GATGTGAAATCTCCTGGCTTAACTGGGAGGAGTCATCCGATACTGTGGGGCTAGAGGACA  
GCAGGGGAAGGTGGAATTCCAGGTGTAGTGGTGAATGCGTAGATATCTGGAGGAACACC  
AGTGGCGAAGGCGGCCTTCCAGGCTGTTTCTGACACTGAGGCCCCGAAAGTGTGGGGAGCG  
AACAGGATTAGAAACCCCGGTAGTCC

>Otu11544

CCAGCCTATGGGACGCTCCAGTCGAGAATCTTCCGCAATGGACGAAAGTCTGACGGAGCG  
ACGCCGCGTGATGGATGAAGTGGTTCGCCATGTAAACATCTTTTATGAGCTACTAAATTT  
TGAAGAGCTCATGAATAAGGAGTTGCTAAACTCGTGCCAGCAGCAGCGGTAATACGAGTG  
CTCCAAGCGTTATCCGGAATTATTGGGCGTAAAGGGTGTGTAGGTTGTCCTGTTAGTCAG  
ATGTTAAAACTCTCCGCTTAACGGAGAAAGGGCATTGTGAAACGGCAGAACTAGAGGATGC  
GAGAGGTGAACAGAACTCATGGTGTAGGGGTGAAATCCGTTGATATCATGGGGAATACCA  
AATGCGAAGGCAGTTCCTACTGGCGCACTCCTGACACTGAAACACGAAAGCGTGGGTAGCGA  
ACTGGATTAGAAACCCGTGTAGTCC

>Otu11548

CCAGCCTATGGGTTGCAGCAGTGGGGAATATTGGACAATGGGCGAAAGCCTGATCCAGCG  
ACGCCGCGTGTTGAAGAAGGCCTGCGGGTTGTAAAGCACTTTTAGTGGGGACAAAAAGC  
CATGGGCTAATACCCTGTGGTCTTGATTTAACCCTAAAGAAAAAGCACCGGCTAACTCTGT  
GCCAGCAGCCGCGTAATACAGAGGGTGCAAGCGTTAATCGGAATTACTGGGCGTAAAGC  
GTGCGTAGACGGTTATCTAAGTCGGATGTGAAATCCCCGGGCTCAACCTGGGAATTGCAT  
TCGAGACTGAATAGCTAGGGTGCGGAAGAGGGAAGCGGAATTTCCGGTGTAGCAGTGAAA  
TGCGTAGGTATCGGAAGGAACATCAGTGGCGAAAGCGGCTTCCTGGTCCAGCACCGACGT  
TCAGGCACGAAAGCGTGGGGAGCAAACAGGATTAGAGACCCCGGTAGTCC

>Otu11550

CCAGCCTATGGGAGGCTCCAGTGGGGAATATTGGACAATGGGGGCAACCCTGATCCAGCA  
ATGCCGCGTGTTGAAGAAGGCCTTCCGGTTGTAAAGCACTTTTATCCGGAACGAAACGC  
GCAGGGTGAATATCCTTGCGAACTGACGGTACCGGAGGAATAAGCACCGGCTAACTTCGT  
GCCAGCAGCCGGGGTAATACGTAGGCAGCAAGCGTTGTTTCGGAATTACTGGGCGTAAAGG  
GTGCGTAGGCGGGTCTTTAAGTCAGGGGTGAAATCCTGGAGCTCAACTCCAGAACTGCCT  
TTGATACTGAGGATCTTGAGTTCGGGAGAGGTGAGTGGAAGTGCAGGTGTAGAGGTGAAA  
TTCGTAGATATTCGCAAGAACACCAGTGGCGAAGGCGGCTCACTGGCCCGATACTGACGC  
TGAGGCACGAAAGCGTGGGGAGCAAACAGGATTAGAGACCCCGGTAGTCC

>Otu11562

GGACTACTGGGGTATCTAATCCTGTTTGCTACCCACACTTTCGCATTTTCAGCGTCAGTTA  
TAGACCAGAACTCGCCTTCGCCACAGGTATTCTTCCGCATATCTACAGATTTACCCCT  
ACACGCGGAATTCCAGTTTCCCCTTCTACACTCAAGCTACGCAGTTTGCAGACCAACTA  
GAGGTAAAGCCTCCGCCTTTAAATCCACACTTACATAACAGCCTACATGCCCTTTACGCC  
CAATGAATCCGAACAACGCTTGCCCCCTACGTATTACCGCGGCTGCTGGCACGAAGTTAG  
CCGGGGCTTATTCTGCGGGTACCGTCATTATCGTCCCCGCCAAAAGAGCTTTACAACCCT  
AAGGCCTTCTTCACTCACGCGGCATGGCTGGATCAGGCTTGCGCCCATTGTCCAATATTC  
CCCACTGGTGCACCCGTAGGCTGG

>Otu11563

CCAGCCTACGGGTGGCAGCAGTCGAGGATTTTTCTCAATGGGGGAAACCCTGAAGGAGCG  
ACGCCGCGTGAGGGATGAAGTCTTTCGGATTGTAAACCTCTGTCTATCTGGGAACGATGTG  
ATCTACCTAACACGTGGATTATTGATAGTACCGGAAGAGGAAGCAGTGGCTAACTCTGTG  
CCAGCAGCCACGGTAATACAGAGACTGCAAGCGTTGTTTCGGAATTCATTGGGCGTAAAGGG  
TGCGCAGGCGGTCTGTAAAGTCGGATGTGAAATCTCACAGCCTAACTGTGATAGGTCATT  
CGAACTGGCGGACTAGAGGACTGGAGAGGAGACTGGAATAGTCCGTGTAGCGGTGAAAT  
GCGTAGAGATCGACTAGAACACCGGTGGCGAAGGCGAGTCTCTGGACAGTTCTTGACGCT  
CAGGTGCGAAAGTGTGGGGATCAAACAGGATTAGAAACCCCTGTAGTCC

>Otu11568

CCAGCCTATGGGGGGCTCCAGTGAGGAATCTTGCGCAATGGGGGAAACCCTGACGCAGCA  
ACGCCGCGTGAGTGATGAAGGCCTTCCGGTCGTAAAGCTCTGCCAGATGGGAAGAATGTC  
CCGGCAGGTGAATAATCGTTGGGATCGACGGTACCGTCAGAGGAAGCACCGGCTAACTCCG  
TGCCAGCAGCCGCGGTAAATACGGAGGGTGCAAGCGTTGTTTCGGAATTATTGGGCGTAAAG  
AGCGTGTAGGCGGCCTTGTAAGTCAGATGTGAAATACCTTGGCTCGACCAAGGAAGTGCA  
TTTGAAACTGCTTGGCTTGAGTACGGGAGGGGGGAAGCGGAATTTCCGGTGTAGAGGTGAA  
ATTCTAGATATCGGGAGGAACACCAGTGGCGAAGGCGGTTTCCTGGCCTGATACTGACG

CTGAGGCGCGAAAGCGTGGGGAGCAAACAGGATTAGATACCCTCGTAGTCC

>Otu11579

CCAGCCTACGGGTGCTGCAGTCGAGAATCTTGGTCAATGGGCGTAAGCCTGAACCAGCG  
AAGCTACGTGGGTGATGACGGCTATTTGGTCGTAAAGTCCCGGAACCTAGACTAGTGTTT  
AACGAAGTTTAGGTGATGAAGTTCTGACTAACTGCCGTGCCAGCAGTCGCGGTAAATCGG  
CGAGAGCGAGTGTTGGTGTAATAATGGGCGTAAAGGATCCGTAGGCGGCTTGGCATTGGCC  
TAATGTGAAGCTCGACTGGCTAGTGGTTAATTCATTAGCAAAGTTGTAGCGTTAGGTAC  
CACTAAGCTAGAGTTGGGTAGAGGAAAGTGGAATACTCAAGCGACAGCTAAAATTGGTAG  
ACCTTGAGTGGAACACCAGAGGCGAAGGCGACTTTCTGGACCCATACTGACGCTGAGGGA  
TGAAGGCTGGGGTAGCGAAACGGATTAGAGACCCCGGTAGTCC

>Otu11584

CCAGCCTACGGGTGCTGCAGCAGCTGGAGGGAGACCTTTAGATCAACCAGAACAAAGAACAG  
ATTTCCCGCTATTGTTACCGATGCTGCCATAATTCCTAGAAACAAGGACAGGTACATAAT  
TCCAGCACCTAAATTGTTTGGCTTGAAGTAACTACTGTCAGAGTGACAGGAATCACGTA  
TCCAAGGATTGTCAATATCACGAACATGACCAATGCAAACCATAACACATTCAGCATAGTA  
CTGAAGATCATTTCTTTGCAAATGCAAGTTGTTCAACCTCTTTGTCTATAGAGAAAGCT  
TGGTATCAGAATGCAGGATTGAAGTAATAGAACAAATACCAAATGCCAACAACTACATG  
CACCTTGTGGCTACATGTGATGTAGATCATTAGAAACCCCGTATCC

>Otu11585

CCAGCCTATGGGTGCAACAGTGGGGAATATTGGACAATGGGCGCAAGCCTGATCCAGCC  
ACGCCGCGTGAGTGATGAAGGCCCTTCGGGTCGTAAAGCTCTGTGGGGAGGGACGAACCGC  
TGATGGTTAATACCCAGCAGCATGACGGTACCTCCTTAGCAAGCACCGGCTAACTTCGTG  
CCAGCAGCCGCGGTAATACGAAGGGTGCAAACGTTGCTCGGAATTATTGGGCGTAAAGCG  
CACGTAGGCGGCTCTACAAGTCGGATGTGAAAGCCTTCGGCTTAACCGAAGAAGTGCATC  
CGAAACTGCAGAGCTTGAGTACCAAAGAGGATCGCGGAATTCCCGGTGTAGAGGTGAAAT  
TCGTAGATATTTCGAAGAACACCAGTGGCGAAGGCGGCTCACTGGCCCCGATACTGACGCT  
GAGGCACGAAAGCGTGGGGAGCAAACAGGATTAGATACCCCGTAGTCC

>Otu11593

CCAGCCTATGGGGTGCAGCAGTGGGGAATCTTGAACAATGGGCGAAAGCTTGATTCAGCG  
ATACTACGTGAATGAGAGAAGGCCAAATGGTCGTAAAGTTCTTTATATCAATAAAAGTGT  
GATTTTAATTGGTAGGAAATAGCCCCGGCTAATATCTGTGCCAGCAGCCGCGGTAATACA  
GGGGGGGCAAGCGTTACTCGTCTTGATTGGGCGCAAAGGGCATGTAGGTGGTTTTATTGTG  
AGTGTGGTAAAATTCTAGAGTTTTTAAGCTTTAGTTCTGCCGGCACTATCGATACAACT  
TGAGTTAGTAAATCGTTAATAGAATTCCTTAGTGTAGCGCTAAAATGTTACGATATTAGGA  
GGAATACTGTAAATGAAAATATTTTTTCGGTTATTAAGTACGCTGAGGTGCGAAGGCATG  
GGGAGCAAACAGGATTAGAAACCCGAGTAGTCC

>Otu11595

CCAGCCTATGGGTGGCACCAGGCATATTTACACGCTCAAAGAAGTCGCCGTCATGATCGG  
AGAGAACATTGAACTGCTCGAGGAAATCATCGCCAACCCAGACAATATTGCCGAAGGCGA  
AATGGTCTATGTCCGCGACGGTAGTGAAGATGGCACGACGGGTCTGACCGAGAACGGCGT  
TAACGACCTTCAGGAGCTTCTCGCGGACATACGCACATGGGATGGTGGAATCCGAGAGTC  
CCTCGTGGGAGAACAATGCGATCCGGAGATTATCGAGCGCATCCTAGCGGACGAGCTAAA  
ACGCCAGCCCTAAAATGCCTCTCGATGGCCGCAAAGGCGTTCCCCGGACGCTTACCTTCC  
AGCAGCCGCCCCGGTGCCGTGCGGATGAAGGGCAAAGAGCGGAGCGGTCCGGCCCCGTTGA  
CGGGATCAAAGGTTCCACCAGGATCCGCGAATTAGAAACCCCTCGTAGTCC

>Otu11596

CCAGCCTATGGGGGGCACCAGTGGGGAATATTGGACAATGGGGGCAACCCTGATCCAGCG  
ATGCCGCGTGTGTGAAGAAGGCCTGAGGGTTGTAAAGCACTTTCGGTGGGGAGGAGGGTT  
TATTGGTTAAGAGCTGATGAACTGGACGTTACCTGCAGAAGAAGCACCGGCTAACTCCGT  
GCCAGCAGCCGCGGTAATACGGAGGGTGCGAGCGTTAATCGGAATTACTGGGCGTAAAGG  
GTGCGTAGGTGGTTTGATAAGTCACATGTAGAAGCCCCGGGCTCAACCTGGGAATGTCGT  
GTGAAACTGTTAGACTTGAGTACGGGAGAGGGCAGTGGAATTTCCGGTGTAGCGGTGAAA  
TGCGTAGATATCGGAAGGAACACCGGTGGCGAAGGCGGCTGCCTGGCCTGATACTGACAC  
TGAGGCACGAAAGCGTGGGGAGCAAACAGGATTAGATACCCGGGTAGTCC

>Otu11599

CCAGCCTATGGGGTGTGCTGCAGTGAGGAATCTTGCGCAATGGGCGAAAGCCTGACGCAGCG  
ACGCCGCGTGAGGATGAAGGTTTTTCGGATCGTAAACTTCTGTAAAGTGGGAAGAAACAC  
CTGTTGTTAATACCAGCAGGAAGTACGGTACCATTAGAGAAAGCACCGGCTAACTACGT



GCCAGCAGCCGCGGTAATACGTAGGGTGCTAGCGTTATTTCGGAATTACTGGGCGTACAGG  
GTGCGTAGACGGCTCATTAAGTCGATTGTTAAAGATCCCGGCCTAACCGGGAAAAAGCGG  
TCGATACTGTTGAGCTAGAGGTTAGAAGAGAGAAGTGGAATTCTCGGAGTAGCGGTAAAA  
TGCGTAGATATCGAGAGGAACACCAATGGCGAAGGCAGCTTCTTGGTCTATACCTGACGT  
TGAGGCACGAAAGCGTGGGGAGCAAACAGGATTAGATAACCCGCGTAGTCC

>Otu11603

CCAGCCTATGGGTCGCAGCAGTGGGAAATCTTGCGCAATGGACGAAAGACTGACGCAGCA  
ACGCCGCGTGAGGGACGAAGGCTTTCTGAGTTGTAAACCTCTTTCGGTAGGAACGATTGT  
GACGGTACCTACAGAAGAAGCACCGGCCAACTATGTGTCAGCAGCCGCGGTGATACATAG  
GGTGCAAGCGTTGTTTCGGATTTATTGGGCGTAAAGAGCTCGTAGGCGGTTTCGATAAGTTG  
GGTGTTAAATCTCCAGGCTTAACCTGGAGCAGCCATCCGAAACTGTCGTGACTAGAGTTT  
GGTAGGGGATCACGGAATTCCTGGTGTAGCGGTGGAATGCGCAGATATCAGGAGGAACAC  
CAGTAGCGAAGGCGGTGATCTGGGCCAATACTGACGCTGAGGAGCGAAAGCGTGGGGAGC  
GAACAGGATTAGAAACCCTAGTAGTCC

>Otu11604

CCAGCCTATGGGGCGCTGCAGTCGAGAATCATTCGCAATGGGCGAAAGCCTGACGGTGCG  
ACGCCGTGTGAGTGAAGAAGGCCTTCGGGTCGTAAAGCTCTTTCGCCTGGGAACAAGGGA  
GGCTGGCAAATAACCAGCCAACTTGAGGGTACCAGGAGAAGAAGCACCGGCTAACTACGT  
GCCAGCAGCTGCGGTAATACGTAGGGTGCAAGCATTAAATCGGATTTATTGGGCGTAAAGG  
GCGCGTAGGCGGGAAGGTAAGTCAGATGTGAAATCCCGGAGCTTAACTCCGGAACGGCAT  
TTGAAACTACCTATCTAGAGGGTAGGCGGAGATAACGGAATTCACAAAGTAGCGGTGAAA  
TGCGTAGATATGTGGAAGAACACCTGTGGCGAAAGCGGTTTTCTAGCTTACTCCTGACGC  
TGAAGCGCGAAAGCTAGGGGAGCAAACAGGATTAGAAACCCCTCGTAGTCC

>Otu11610

CCAGCCTATGGGTGGCTCCAGTGGGGAATCTTGCAATGGGCGAAAGCCTGATGGAGCG  
ACGCCGCGTGAGGATGAAGGTTTTTCGGATTGTAACTCCTGTCACTGCAGAACAAGGCT  
ATGCGGTTTTAATAGACCATGTAGTTGATGGTATGCGGAGAGGAAGGGACGGCTAACTCTG  
TGCCAGCAGCCGCGGTAAGACAGAGGTCCCGAGCGTTGTTTCGGATTCAATTGGGCGTAAAG  
GGTGTGTAGGAGGTCGGGTCAGTCAGGTGTGAAATCTCAGGGCTTAACCTGAAACTGCG  
CTTGATACTGCCCGGCTAGAGGATCGGAGGGGGTATCGGAATTTATGGTGTAGCAGTGAA  
ATGCGTAGATATCATAAGGAACACCGGTGGCGAAGGCGGATACCTGGAAGATTCTCTGACT  
CTGAAACACGAAAGCCAGGGGAGCAAACGGGATTAGAAACCCAGTAGTCC

>Otu11620

CCAGCCTATGGGTGGCAGCAGTAACGAATCTTCCGCAATGCACGCAAGTGTGACGGAGCA  
ACGCCGCGTGTGGGATGAAGTCCTTCGGGATGTAAACCACTGTCAGGGGTAGGAAAGTTC  
TGATCCACCCAGAGGAAGGCACGGCTAACTCTGTGCCAGCAGCCGCGGTAAGACAGAGG  
TGCCGAGCGTTAGGCGGAATCACTGGGCTTAAAGCGTGTGTAGGCGGATCGTTAAGTACC  
TTGTGAAATCCCACGGCTCAACCGTGAACTGCTGGGTATACTGGCGGTCTTGAGTCACC  
TAGGGGCTACCGGAACAAATGGTGGAGCGGTGAAATGCGTAGATATCATTTGGAACGCCA  
ATGGCGAAAGCAGGTAGCTGGGGGTGAACTGACGCTGAGACACGAAAGCCAGGGGAGCAA  
ACGGGATTAGATAACCCGAGTAGTCC

>Otu11630

CCAGCCTACGGGTGGCAGCAGTAAGGAATATTGGTCAATGGGCGGAAGCCTGAACCAGCC  
ATGCCGCGTGCAGGAAGACGGCCCTACGGGTTGTAACTGCTTTTGCAGGGGAATAAACC  
TTCGTATGTATACGAAGCTGAATGTACTCTGAGAATAAGGATCGGCTAACTCCGTGCCAG  
CAGCCGCGGTAATACGGAGGATCCAAGCGTTATCCGGATTTATTGGGTTTAAAGGGTGCG  
TAGGTGGCTTATTAAGTCAGGGGTGAAAGACGGTAGCTTAACTATCGCGGTGCCTTTGAT  
ACTGATGAGCTTGAATGAACTAGAGGTAGGCGGAATGTGACAAGTAGCAGTGAAATGCAT  
AGATATGTCACAGAACACCAATTGCGAAGGCAGCTTACTATGGTTTTTATTGACACTGAGG  
CACGAAAGCGTGGGGATCAAACAGGATTAGATAACCCCGTAGTCC

>Otu11631

CCAGCCTATGGGGTGCACCAGTAAGGAATATTGGTCAATGGGCGGAAGCCTGAACCAGCC  
ATGCCGCGTGCAGGAAGACGGCCCTACGGGTTGTAACTGCTTTTGCAGGGGAATAAACC  
CCGTTACGTGTAACGGGTTGAATGTACTCTGAGAATAAGGATCGGCTAACTCCGTGCCAG  
CAGCCGCGGTAATACGGAGGATCCGAGCGTTATCCGGATTTATTGGGTTTAAAGGGTGCG  
TAGGCGGCCTGTTAAGTCAGGGGTGAAAGACGGTAGCTTAACTATCGCAGTGCCTTTGAT  
ACTGACGGGCTTGAATGTAGTTGAGGTAGGCGGAATGTGACAAGTAGCAGTGAAATGCGT  
AGATATCAAGTGGAACACCAGTGGCGAAGGCGAGTCTCTGGACAACCTTCTGACACTGAGG

CACGAAAGCTAGGGGAGCAAACAGGATTAGATACCCTAGTAGTCC

>Otu11632

CAGCCTATGGGTGGCAGCAGTAAGGAATATTGGTCAATGGGCGGAAGCCTGAACCAGCCA  
TGCCGCGTGCAGGAAGACGGCCCTACGGGTGTAAACTGCTTTTGCAGGGGAATAAACCC  
CCATATGTATATGGGGCTGAATGTACTCTGAGAATAAGGATCGGCTAACTCTGTGCCAGC  
AGCCGCGTAATACAGAGGGTGCAGCGTTAATCGGAATTACTGGGCGTAAAGCGCGCGT  
AGACGGTTTTGTAAAGTCAGATGTGAAATCCCTGGGCTCAACCTGGGAGCTGCATTTGAGA  
CTGCATGGCTAGAGTATCGAAGAGGGAAGTGAATTTCCGGTGTAGCGGTGAAATGCGTA  
GATATCGGAAGGAACACCAGTGGCGAAAGCGACTTCCTGGTCAATACTGACGTTTCATGT  
GCGAAAGCGTGGGGAGCAAACAGGATTAGAAACCCGCGTAGTCC

>Otu11639

CCAGCCTATGGGGGGCAGCAGTGGGGAATATTGGACAATGGGCGAAAGCCTGATCCAGCA  
ATACCGCGTGTGCGATGAAGGTCTTCGGATTGTAAAGCACTTTTAATTGGGAAGAAGGTT  
AGCGTGATAACACCATGACTAATTGACGCTACCGATAGAAAAAGCACCCGGCTAACTCTGT  
GCCAGCAGCCGCGTAATACAGAGGGTGAAGCGTTAATCGAAATAACTGGGCGTAAAGA  
GTACGTAGGCGGAATTATAAGTCGTGTGTGAAAACTGGGGCTCAACCTCGGGACTGCAC  
ACGATACTGTAAATCTAGAGTTTGGTAGAGGTAAGTGAATTTCCGGTGTAGCGGTGAAA  
TGCATAGATATCGGAAGGAACACTAGTGGCGAAGGCGACTTACTGGGCCAATACTGACGC  
TGAGGTACGAAAGCGTGGGGAGCAAACAGGATTAGAAACCCCTGGTAGTCC

>Otu11641

CCAGCCTATGGGTGGCAGCAGCTAAGAATATTCCGCAATGGGAGAAATCCTGACGGAGCG  
ACGCCGCGTGGGTGATGAAGGTCTTCGGACTGTAAACCCCTGTCGTCAGGGACGAAGGTG  
GCGGAGTTAACTCCGTTACTTGACGGTACCTGGAGAGGAAGCCCCGGCTAACTCTGT  
GCCAGCAGCCGCGTAATACAGAGGGGGCAAGCGTTATTCGGAATTATTGGGCGTAAAGG  
GCGCGTAGGCGGTTTTTTAAGTCAGATGTGTAATCCCCGAGCTTAACTTGGGAACTGCAT  
CTGAGACTGGGAGGCTAGAGTACTGGAGAGGGTGGTGAATTCCTCGTGTAGCGGTGAAA  
TGCGTAGAGATGAGGAGGAACACCAGTGGCGAAGGCGGCCACCTGGACAGTAACCTGACGC  
TGAGGCGCGAAAAGTGTGGGTAGCAAACAGGATTAGATACCCGCGTAGTCC

>Otu11644

CCAGCCTACGGGGTGCTCCAGTGGGGAATATTGGGCAATGGGCGCAAGCCTGACCCAGCA  
ACGCCGCGTGAGGGAAGAAGGTCTTCGGATTGTAAACCTCTGTCTTAGGGACGAAAAAA  
ATGACGGTACCTAAGGAGGAAGCTCCGGCTAACTACGTGCCAGCAGCCGCGTAATACGT  
AGGGAGCAAGCGTTGTCCGGAATTACTGGGCGTAAAGGGTGCGTAGGCGGCGCTGCAAGT  
CAGATGTGAAATCCCCGGGCTTAACCCGGGACCTGCATTTGAACTGCAGTGCTTGAGTG  
CAGGAGAGGAAAGCGGAATTCCTAGTGTAGCGGTGAAATGCGTAGATATTAGGAAGAACA  
CCAGTGGCGAAGGCGGCTTTCTGGACTGTAACCTGACGCTGAGGCACGAAAGCGTGGGGAG  
CAAACAGGATTAGAAACCCGCGTAGTCC

>Otu11645

CCAGCCTATGGGATGCAGCAGTAGGGAATTTTTCGCAATGGGCGAAAGCCTGACGCAGCA  
ACGCCGCGTGAGTGATGAAGGTCTTCGGATTGTAAAGCTCTGTTGAGTGGGAAGAAAAGT  
TCCGGCGTTAATATTCCGGGATATGACGGTACCATTTCGAGTAAGCCCCGGCTAACTACGT  
GCCAGCAGCCGCGTAATACGTAGGGGGCAAGCGTTGTTTCGGAATTACTGGGCGTAAAGG  
GAGCGTAGGCGGAAACGTAAGTTAGAAGTTTAACATATGGGCTTAACCCATAATCTGCTT  
TTAATACTGCGTTTCTTGAGTATGGAAGAGGGAGATGGAATTCAGGTGTAGCGGTGGAA  
TGCGTAGATATCTGGAAGAACACCAGTTGCGAAGGCGGTCTCCTGGTCCAATACTGACGC  
TGAGGCTCGAAAGCTAGGGGAGCAAACAGGATTAGATACCCCGTAGTCC

>Otu11648

CCAGCCTATGGGTGGCTGCAGTGGGGAATTTTTCGCAATGGGGGAAACCCCTGACGCAGCA  
ACGCCGCGTGAGGATGAAGCCCTTGGGGTGTAACTCCTTTTCGACTGGGAAGATTATG  
ACGGTACCAGTGGAAGAAGCACCGGCTAACTCTGTGCCAGCAGCCGCGGTAATACAGAGG  
GTGCGAGCGTTGTTTCGGAATTATTGGGCGTAAAGGGCGCGTAGGCGGTGTTGTAAGTCAC  
CTGTGAAACCTCTGGGCTTAACTCAGAGCCTGCAGGCGAAACTGCAATGCTGGAGGGTGG  
GAGAGGTGCGCGGAATTCCTGGTGTAGCGGTGAAATGCGTAGATATCGGGAGGAACACCA  
GTGGCGAAGGCGGCTTTCTGGTCTGCAACTGACGCTGAAACGCGAAAGCTAGGGGAGCAA  
ACGGGATTAGATACCCCGTAGTCC

>Otu11649

CCAGCCTACGGGTGGCACCAGTGAGGAATATTGGTCAATGGGCGCAAGCCTGAACCAGCC  
ATCCCGCGTGCAGGAAGAAGGCGCTATGCGTTGTAAACTGCTTTTCCGAGGGAAGAAAAC

CCCCGACGTGTCGGGGCTTGTTCGGTACTTTGGGAATAAGCATCGGCTAACTCCGTGCCAG  
CAGCCGCGGTAATACGGAGGATGCGAGCGTTATCCGGATTTCATTGGGTTTAAAGGGTGCG  
TAGGCGGACTGATAAGTCAGTGGTGAAAACCTGCAGCTTAACTGTAGAACTGCCATTGAT  
ACTGTCGGACTTGAGTATGGTCAAGGTAGGCGGAATGTGTAATGTAGCGGTGAAATGCAT  
AGATATTACACGGAACACCGATTGCGAAGGCAGCTGACAAAACCTGTAAGTACGCTGAGG  
CTCGAAAGCGTGGGGATCAAACAGGATTAGAAACCCCTGTAGTCC

>Otu11652

CCAGCCTATGGGATGCTGCAGTCGAGAATCTTCCACAATGGACGAAAGTCTGATGGAGCG  
ACGCCGCGTGGTTGACGAAGTCCTTCGGGACGTAAAAACCTTTTATGGGGGAGGAAGTAA  
TTGACGTTACCCCATGAATAAGGGGCTCCTAACTCTGTGCCAGCAGGAGCGGTAATACAG  
AGGCCCCGAGCATTATCCGGAATCACTGGGCGTAAAGGGTGTGTAGGCGGTCATATTAGT  
CGACTGTGAAAGATCTCGGGCTTAACCCGGGAGACGCAATGGAAACGGTATGACTTAGAG  
GATGTGAGAGGTACAGGGAACTCATGGTGTAGGGGTGAAGTCCGTTGATATCATGGGGAA  
CACCAAATGCGAAGGCACTGTACTGGCACATTCCTGACGCTGAGACACGAAAGCGTGGGA  
ATCGAACGGGATTAGAGACCCCTGTAGTCC

>Otu11655

CCTACGGGTGGCACCAGGTCAGTCGGAACAGTGTACTGAACCAGGCCCGCTGCTTTCTGA  
CTGCTCTTCTCTTCGGAAAAAAGAAGAACAGTCTGTCCCGGTTCCGGTTGAACCTTTCCA  
GGGTAATAGATCGGTCCTCCAACGGTGACCCCGAATGTGTTGTAACGGTAGATCGCGCGC  
GGCACGGAATTGAGGTTGTTGAAGTAGGTGTTGCGGTTCAATGACTCGTTGCGAATATAT  
TCATATGCGCTGCCGTGGAACGTACGTGTCCCGGACTTCGTACGCCAACGATAACGGCG  
CTGCCGTTTCTGCCATACTCGGCCCCGAAATTTGTTGACGAGAACCGTCACCTCGCTGATG  
GCGTCAATGTTGGAAGTGAACGGGTACTGCGGATTAGATACCCGTGTAGTCC

>Otu11657

CCAGCCTATGGGGTGCTGCAGTGAAGAATCTTGGGCAATGGACGAAAGTCTGACCCAGTG  
AGAATACATGCATGACGAATGCGCATAGTTTTCTGTAAAGTGCTATTCGCGGATTGAAGA  
AAATGACTAAACCGAGATGAAGCGCCGGCCAACTCCGTGCCAGCAGCCGCGGCAAGACGG  
AGGGCGCGAGCGTTATTTCGTTTTGATTGGGTGTAAAGGGTACGTAGGCTGCCCTAGTTT  
TTTGACCAAAAGAGCGGAGTGTTCCCTACGCGACGGTCTTTTAAAAAGGGGGCTTGTGTTA  
GAGATAGGTTCGGTCAAATTCTTAAGTAGGGGTAAAGATCCAACGAGATGAGAATGAACGT  
CAGCTGGCGAAGGCGCCTCTCCCGCTCTAACAGGCGCTAAGGTACGGAAGCTTAGGTAGC  
AAACAGAATTAGATACCCGCGTAGTCC

>Otu11662

CCAGCCTATGGGGGGCACCAGTAGGGAATATTGGGCAATGACCGAAAGGTTGACCCAGCG  
ACGCCGCGTGGAGGATGAAGGCTTTCGGGTGTAAACTCCTGTCAGAGGGGAAGAACTC  
TTGTTTTAACAAACGGGATTGACTTAACCCCTCAGAGGAAGCACC GGCTAACTCCGTGCCAG  
CAGCTGCGGTAATACGGAGAGTGCAAGCGTTGTTTCGGATTTACTGGGTGTAAAGGACCTG  
TAGGCGTCCAGATCAATCAGACGTGTAATACCCCGCTTACCCGGGGAACGGCATCTGAT  
ATTGTCTGGATCGAGGATGGGATAGGAGAGCGGAACGTGTAGGTGTAGCGGTGAAATGTGT  
AGATATCTACAGGAACACCAGAGGCGCAGGCGGCTCTCTGGCCCATATCTGACGCTGAGG  
GGTGAAAGCTAGGGGAGCAAAACAGGATTAGAAACCCGGGTAGTCC

>Otu11663

CCAGCCTACGGGGGGCTGCAGCAACGAATATTGGGCAATGGGCGAAAGCCTGACCGAGCG  
ACGCCGCGTGCAGGATGAAGGCCCTCGGGTTGTAAACTGCTTTTCTTCAGGATGAAGTAT  
GGTCCGCAAGGGTCATATTGACGGTACTGAGGGAATAAGTGGCTGCAAACCTTCGTGCCAG  
CAGCCGCGGTAATACGAAGGCCACAAGCGTTATCCGGATTTATTGGGCGTAAAGGGTGCG  
TAGGAGGACCGGTGCGTCTCTTGTTAAATTTACCGCTCAACGGTGAAGCCGCAAGGGAT  
ACGATCGGACTAGAGGGCGTTAGAGGCAGATGGAACACACGGTGTAGGGGTGAAATCCGT  
TGATATCGTGTGGAACACCAAAGGCGAAGGCATTCTGCTGGGACGTTCTGACTCTGAGG  
CACGAAAGCGTGGGGAGCAAAAAGGATTAGAAACCCCTCGTAGTCC

>Otu11665

CCAGCCTACGGGTGGCTGCAGTGGGGAATCTTGCGCAATGGGCGAAAGCCTGACGCAGCA  
ACGCCGTGTGAGTGATGAAGGCTTTCGGGTGCTAAAGCTCTGTCAGATGGGAAGAATTAG  
TCTGCTGAAAAATATCTGCAGATGATGACGGTACCATCGAAGGAAGCACCGGCTAACTCCG  
TGCCAGCAGCCGCGGTAATACGGAGGGTGCAAGCGTTGTTTCGGAATTATTGGGCGTAAAG  
CGCGTGTAGGCGGATAGATAAGTCAGGTGTGAAATCCCTTGACTCAATCAAGGAACTGCA  
CTTGAAACTATTTATCTCGAGTACGATAGGGGAGGGCGGAATTCCCAGTGTAGAGGTGAA  
ATTCATAGATATTGGGAGGAACACCAGTGGCGAAGGCGACCCTCTGGATCGATACTGACG

CTGAGACGCGAAAGCGTGGGTAGCAAACAGGATTAGAAAACCCGGGTAGTCC

>Otu11668

CCAGCCTACGGGTCGCTGCAGTGGGGAATATTGGACAATGGGCGCAAGCCTGATCCAGCC  
ATGCCGCGTGAGTGATGAAGGCCCTAGGGTTGTAAAGCTCTTTCACCGGAGAAGATAATG  
ACGGTATCCGGAGGAGAAGCCCCGGCTAACTTCGTGCCAGCAGCCGCGGTAATACGAAGG  
GGGCTAGCGTTGTTTCGATTCTACTGGGCGTAAAGCGCACGTAGGCGGATCGATCAGTCAG  
GGGTGAAATCCCAGAGCTCAACTCTGGAAGTGCCTTTGATACTGTTCGATCTGGAGTATGG  
AAGAGGTGAGTGGAATTCCGAGTGTAGAGGTGAAATTCGTAGATATTCGGAAGAACACCA  
GTGGCGAAGGCGGCTCACTGGACAGGTATTGACGCTGAGGTGCGAAAGCGTGGGGAGCAA  
ACAGGATTAGAAAACCCCACTAGTCA

>Otu11675

CCAGCCTATGGGTTGCAGCAGTCGAGGATCTTCGGCAATGGGCGCAAGCCTGACCGAGCG  
ACGCCGCGTGCGGGATGAAGGCCCTTCGGGTTGTAAACCGCTGTCAGTGGGGAGGAAGGCT  
CTGTGAAGAGCGGAGTTTGACCTATCCGCAGAGGAAGTACGGGCTAAGTTCGTGCCAGCA  
GCCGCGGTAAGACGAACCGTACGAACGTTATTTCGGAATCACTGGGCTTAAAGGGTGCGTA  
GGCGGTCCGGTAAGTCGGGTGTGAAATACCTCAGCTTAACTGAGGAATTGCGCCCCGAAAC  
TGTCGGACTTGAGGGAGACAGAGGTGAGCGGAACCTAGGGTGGAGCGGTGAAATGCGTTG  
ATATCCTAAGGAACACCAGGGGCGAAAGCGGCTCACTGGGTCTCTTCTGACGCTGAGGCA  
CGAAAGCTAGGGTAGCGAAGAGGATTAGAAAACCCCTTGTAGTCC

>Otu11677

CCAGCCTACGGGGCGCTGCAGTCGAGAATCTTCCACAATGGACGAAAGTCTGATGGAGCG  
ACGCCGTGTGATTGATGAAGTCCCTCTGGGACGTAAAGATCTTTTATGAGGGAAGAAGTT  
TATTGACTGTACCTCATGAATAAGAGGCTCCTAATCTCGTGCCAGCAGGAGCGGTAATAC  
GAGAGCCTCGAGCGTTATCCGGAATTATTGGGCGTAAAGGGTGCGTAGGTTGTTCTGTTA  
GTCTTTTGTCAAACCTCGCTGGCTCAACTGGCGGCATGCGGAAGAAACGGCAGAACTTGAA  
AGTGCGAGAGGTATACAGAACTCATGGTGTAGGGGTGAAATCCGTTGATATCATGGGGAA  
TACCAAATGCGAAGGCAGTATACTGGCGCATATTTGACACTGAAGCACGAAAGCGTGGGT  
AGCGAATGGGATTAGAAAACCCCTAGTAGTCC

>Otu11688

CCAGCCTACGGGTTGCTGCAGTGAAGAATCTTGGGCAATGGAGGAAACTCTGACCCAGTG  
AGAGTACATGCATGATGGAGGCGCGTAGTTTTCTGTAAAGTGCTTTCAGTGACGAAGATA  
ATGTCCGTAGTCACAGTAAGAAGCGCCGCCAACTCCGTGCCAGCAGCCGCGGTAAGACG  
GAGGGCGCGGGCGTTATTTCGTTTTGATTGGGTGTAAAGGGTACGTAGGCTGCTGAAAAAA  
ATTCTTGGTTCAAATCGCGGAGTGTTCTACGCGTGGTCCTCTTATTGATTCAGCTTGTG  
TTGATGATGGGTGCGGGGAATTTCTGTGTAGGGGTAAAGATCCAGCCAGATAGGAACGAA  
CGCCAGCTAGCGAAGGCGCCCTTCTAGTTTCAACAGACGCTAAGGTACGGAAGCCTGGGG  
AGCAAACAGAATTAGAAAACCCCTGGTAGTCC

>Otu11690

GGACTACTAGGGTTTCTAATCCTGTTTGCTCCCCACGCTTTCGCGTCTCAGCGTCAATAT  
CGGTCCAGGTAGCCGCTTCGCCACCGGTGTTCTCTGATATCTACGGATTTCACTCCT  
ACACCAGGAATTCCACTACCCCTCTCCCGTATTCAAGTCTCCAGTTTCCAATGCACTTCC  
CGGGTTGAGCCCAGGGCTTTCACATCAGACTTAAAAAACCGCCTACACGCGCTTTACGCC  
CAATAATTCCGAACAACGCTCGCACCCCTCCGTATTACCGCGGCTGCTGGCACGGAGTTAG  
CCGGTGCTTCTTTGAGGGTACCGTCAAGTAAAAGGGGTATTAACCCCTCTCACACTTCTT  
TCCCTCTGACAGAGCTTTACGACCCGAAGGCCTTCATCACTCACGCGGCGTTGCTGCGTC  
AGGGTTTCCCCCATTCGCGAAAATTCCCCACTGCTGCCCCCATAGGCTGG

>Otu11695

CCAGCCTACGGGGGGCAGCAGTCGCGAATCATTGGCCAATGTGCGAAAGCATGACCATGC  
GACGCCGCGTGGGGGAGGAAGGTCTTCGGATCGTAAACCCCTGTCACCGGGGAATAATGA  
CCGGCCTTTAATAGGGGCCGGGCGAGAACCAACCCGGAGAGGAAGTAGTGGCTAACTCCG  
TGCCAGCAGCCGCGGTAATACGGAGACTACGAGCGTTACTCGGATTCAGTGGGCGTAAAG  
GGTGCGTAGGCGGACAGGTGTGTACGGTGTGAAATCCCGGGGCTTAACTCCGGAACGGCG  
CTTGAAACTACCTGTCTAGAGACTTGAGAGGGCAGTGGAATTCTCGGTGTAGCGGTGAA  
ATGCGTAGATATCGAGAGGAACACCAACGGCGAAGGCAGCTGCTTGGAACAAGTACTGACG  
CTGAAGCACGAAAGCGTGGGGAGCAAAAGGGATTAGATAACCCGAGTAGTCC

>Otu11700

CCAGCCTACGGGGGCTCCAGTGAGGAATTTTGGGCAATGGGCGAAAGCCTGACCCAGCGA  
CGCCGCGTGGGTGATGAAGGCCCTTCGGGTGCTAAACCCCTGTGAGCCGAGAAGAAGCCG

GCCGTGCTAATACCACGGTGCGGTGACAGTATCGGCAGAGGAAGCCCCGGCCAACTACGT  
GCCAGCAGCCGCGGTAATACGTAGGGGGCAAGCGTTGTTTCGGAATTACTGGGCGTAAAGC  
GCGTGTAGGCGGTCTGATTAGTCGGAAGTGAAATCCCTCGGCTCAACCGGGGAAGTCTT  
TCGATACTGTCAGACTTGAGTGCGGGAGGGGAGAGCAGAATTCCTCGGTGTAGCGGTGAAA  
TGCGTAGATATCGGGAGGAATACCGGTGGCGAAGGCGGCTCTCTGGACCGCGACTGACGC  
TGAGACGCGAAAGCGTGGGGATCAAACAGGATTAGAAACCCGAGTAGCC

>Otu11703

CCAGCCTACGGGACGCTGCAGTAAGGGATATTGCGCAATGGGCGAAAGGCTGAGGGAGCG  
ACGCCGCGTGATGATGAAGCTCTTCGGAGTGTAATACTTTTCTCTGGGACGAATTTT  
GACTTTACCAGAGGAATAAGGAGCCGCTAACCTCGTGCCAGCAGCGGCGGTAATACGAGG  
GCTCCAAGCGTTATCCGGATTTATTGGGCGTAAAGGGTACGTAGGTGGTTTGATGCATCT  
TTCGTTAAATCCTCAGGCTTAACCTGAGGGCCGCGGAAGAGATGGTCAGACTAGAGACCG  
GAAGAGGCAAGCGGAATTGTTGGTGTAGGGGTAAATCCGTTAATATCAACAAGAACACC  
AAAAGCGAAGGCAGCTTGCTAGGACGGTTCTGACACTGAGGTACTAAAGCGTGGGGAGCG  
AACAGGATTAGAGACCCCCGTAGTCC

>Otu11711

CCAGCCTACGGGAGGCTGCAGTCGAGAATCTTTCGCAATGGGGGAAACCCTGACGACGCG  
ACGCCGCGTGAGGATGAAGGCCTTCGGGTGTAAACTCCTGTCAGCTGGGAGGAATAAG  
CGGTTCAATTAACAATGGATCGCCTTGACAGTACCAGCAGAGGAAGCCACGGCTAACTCTG  
TGCCAGCAGCCGCGGTAATACAGAGGTGGCAAGCGTTGTTTCGGATTTATTGGGCGTAAAG  
GGTCCGTAGGCGGCCTAGAAAGTCGGATGTGAAATCCACAGCTTAACTGTGGAAGTGCA  
TTCGAACTTCTAAGCTCGAGTGTGAGAGGGGGCAAAGGGAATTCCTCGGTGTAAGAGTGAA  
ATCTGTAGAGATCGGGAGGAACACCAGTCGCGTAGGCGCTTTGCTGGCTCACTACTGACG  
CTGAGGGGCGAAAGCCAGGGGAGCAAACGGGATTAGAGACCCGCGTAGTCC

>Otu11714

CCAGCCTATGGGGGGCAGCAGTCGAGAATATTCCACAATGGGCGAAAGCCTGATGGAGCG  
ACGCCGCGTGAGGAAGAAGCCCTTCGGGGTGTAAGTCTTTTATTAAAGAGGAAGTTA  
ATGACTATTTAGTGAATAAGGGGCTGCAAACTTCGTGCCAGCAGCCGCGGTAATACGAAG  
GCCCCGAGCGTTATCCGGATTTATTGGGCGTAAAGCGTGCGTAGGAGGTTTAGTGAGTCT  
GTTGTTAAATTTTCGCTGCTTAACGGCGGAGCCGCAACAGATACTACTAGACTAGAGTG  
TGAGAGGCTAATAGAACTCACGGTGTAGGGGTGAAATCCGTTGATATCGTGGGGAATACC  
AAAGGCGAAGGCATTTAGCTAGCGCATTACTGACTCTAAGGCACGAAAGCGTGGGGAGCA  
AAAAGGATTAGAGACCCCGGTAGTCC

>Otu11717

CCAGCCTACGGGACGCAGCAGTAAGGAATATTGGGCAATGGGCGAAAGCCTGACCCAGCA  
ACGCCGCGTGAGGATGAAGGCCTTCGGGTGTAAGTCTTTTGTCTGGGGACGAGGAAG  
GACGGTACCCGCGCAATCAGTCACGGCTAACTACGTGCCAGCAGCCGCGGTAACACGTAG  
GTGGCAAGCGTTATCCGGATTTACTGGGCGTAAAGCGTGTGCAGGCGGGACTCCAAGTGG  
TGTATGAAAGCACCCGGCTCAACCGGGTGAGGTTATGCCAGACTGGAGTTCTGGAGGCTG  
AGAGAGGGACATGGAATTCCGGGTGTAGTGGTGAATGCGTAGAGATCCGGAGGAATCC  
AGAGGCGAAGGCGGTGTCTGGCTCAGACCTGACGCTCAGACACGAAAGCATGGGTAGCG  
AACGGGATTAGAAACCCTAGTAGTCC

>Otu11718

CCAGCCTACGGGGGGCTCCAGCTAAGAATATTCCGCAATGGACGCAGGTCTGACGGAGCG  
ACGCCGCGTGATGGATGAAGTGCTTTGGTATGTAAACATCTTTTATCGGGGACGAAGTTT  
ATTGACGGTACCCGATGAATAAGGGGCTCCTAACTCTGTGCCAGCAGGAGCGGTAATACA  
GAGGCCCCAAGCATTACCCGGAATAACTGGGCGTAAAGGGTGTGCAGGCGGTACATATTAG  
TCCTTCGTAAATCCGTGGGCTCAACCTACGGTCCGCGAAGGAAACGGTATGACTCGAGG  
GCGCGAGAGGTGCACAGAACTCATGGTGGAGGGGTGAAATCCGTTGATATCATGGGGAAC  
ACCAAAGGCGAAGGCAGTGCCTGGTGCCTTCCTGACGCTCAAACACGAAAGCCAGGGTA  
GCGAACGGGATTAGAAACCCCCGTAGTCC

>Otu11719

CCAGCCTATGGGTCGCAGCAGTGAGGAATTTTCGCAATGGGCGAAAGCCTGACGGAGCG  
ACGCCGCGTGGGTGAAGAAGGTTTTTCGGATCGTAAGCCCTGTCAGGGGGAAAGAATCCC  
CTCCGTGTAAATAATGCGGAGGGCTGACGGTACCCCCAAAGGAAGCTCCGGCCAACTACG  
TGCCAGCAGCCGCGGTAATACGTAGGGAGCGAGCGTTATCCGGAATCACTGGGCGTAAAG  
AGCTCGTAGGCGGTTTCGTTAAGTCGCATGTTAAATCCCCGGGCTCAACTCGGGAAATGCG  
TGCGAAACTGACAACTAGAGGACGGGAGAGGTAAGTGGAATTCATGGTGTAGCGGTGAA

ATGCATAGATATCATGAAGAACACCAGTGGCGAAGGCGGCTTACTGGACCGTTCTCTGACG  
CTGAGGAGCGAAAGCCAGGGGAGCAAACGGGATTAGAAACCCGCGTAGTCC  
>Otu11726  
CCAGCCTACGGGGTGCTGCAGTCGAGAATTTTTCTCAATGGGCGAAAGTCTGACGGAGCG  
ACGCCGCGTGAGGATGAAGTCTTTCGGAATGTAACTCCTTTTGCCAGGGAAAAAGTTA  
TTGATTGTACCTGGAGAATAAGAAGTTGCTAACTCGTGCCAGCAGCAGCGGTAATACGA  
GTGCTTCAAGCGTTATCCGGAATCATTGGGCGTAAAGGGTGTGTAGGCGGCGATGTTAGT  
CTCGCGTTAAATCTTTCGGCTCAACCGAGAGTCCGCGTGGGAAACGGCATTGCTAAGAGG  
ATGGCAGAGGTCTCTGGAACCATGGTGTAGCGGTGAAATGCGTTGATATCATGGGGAAC  
ACCAAAGCGAAGGCAAGAGACTGGGCCACTCCTGACGCTGAAACACGAAAGCGTGGGTC  
GCGAATGGGATTAGAAACCCGAGTAGTCC  
>Otu11735  
CCAGCCTATGGGTGGCACCAGTAGGGAATTTTGC GCAATGGGCGAAAGCCTGACGCAGCA  
ACGCCGCGTGAGGGATGAAGGTCTTTCGGAATGTAACTCCTGTTGAGTGGGAAGAAACGT  
ACCGAGGCGAATACCCTCGGTGCCTGACGGTACCATTTCGAGGAAGCCCCGGCTAACTACG  
TGCCAGCAGCCGCGGTAATACGTAGGGGGCTAGCGTTGTTTCGGAATCACTGGGCGTAAAG  
GGAGTGTAGGCGGGGATGTAAGTCAGGAGTGTAACTTACGGGCTCAACCCGTAATTTGCT  
CTTGAGACTGCGTTTCTTGAGTAGTGAGAGGGAGACGGAATTCCAGGTGTAGCGGTGGA  
ATGCGTAGATATCTGGAAGAACACCAGTAGCGAAGGCGGTCTCCTGGCCACATACTGACG  
CTGAGGCTCGAAAGTGTGGGGAGCGAAACGGATTAGAAACCCGAGTAGTCC  
>Otu11741  
CCAGCCTACGGGGGGCAGCAGCTAAGAATCTTCCGCAATGGGCGAAAGCCTGACGGAGCG  
ATGCCGCGTGATCGATGAAGGTCGAGAGATTGTAAAGATCTTTTCCACATGAGGAATAAC  
CATCGGAGGGAATGCCGGTGGGATGACGTCAGTGTGGGAATAAGCCCCGGCTAATTACGT  
GCCAGCAGCCGCGGTAACACGTAAGGGGCGAGCGTTGTTTCGGAATTATTGGGCGTAAAGG  
GCACGCAGGCGGCCCGGCAAGTCTGATGTGAAAGACCTGGGCTCAACTCAGGGACCGCGT  
TGGAACCTGCCGAGCTGGAATCTTGAGGGGGGAGTCGGAATTCCTAGTGTAGGGGTGAAA  
TCTGTTGATATTAGGAAGAACACCGGTGGCGAAGGCGGACTCCTGGCCGAAGATTGACGC  
TGAGGTGCGAAAGCATAGGGGAGCAAACAGGATTAGAAACCCAGTAGTCC  
>Otu11751  
CCAGCCTACGGGGTGCTCCAGTGAGGGATATTGCACAATGGGGGAAACCCTGATGCAGCG  
ACGCCGCGTGGGTGATGAAGGACTTCGGATCGTAAAGCCCTTTTCTGCGTGACGAGGAAG  
GACGGTAGCGCAGGAAGAAGTCTCGGCTAACTACGTGCCAGCAGCCGCGGTAACACGTAG  
GAGGCAAGCGTTATCCGGAGTTACTGGGCGTAAAGCGCGTGACGGTGGTTGGACAAGTTC  
GGTGTGAAAGCGCCCGGCTCAACTGGGCGAGGACATTGAAGACTGTTTCGACTGGAGGCGG  
GTAGAGGGGCGTAGAATTCCGGGTGTAGCGGTGAAATGTGTAGAGATCCGGAGGAATACC  
AGTGGTGAAGACGGCGCCCTGGGCCCGACCTGACACTGAGACGCGAAAGCGTGGGGAGCG  
AACGGGATTAGAAACCCTAGTAGTCC  
>Otu11753  
CCAGCCTATGGGGGGCACCAGTGAGGAATATTGGGCAATGGACGAAAGTCTGACCCAGCA  
ACGCCGCGTGAGGATGAAGGTCGTAAGATCGTAACTCCTTTTGAGAGGGATGAATATA  
CAGATTTTCGTAAGGGATTTGTACTGACCGTACCTCTAGAAGAAGCCCCGGCTAACTACGT  
GCCAGCAGCCGCGGTAATACGTAGGGGGCAAGCGTTGTCCGGATTTACTGGGTGTAAAGG  
GCGCGTAGGCGGATTTGTAAAGTCAGAGGTGAAAGCCCGCAGCTTAACTGCGGAAGTGCCT  
TTGATACTGCATATCTTGAATTCGGAAGAGAGAAGCGGAATTCCAGGTGTAGTAGTGAAA  
TACGTAGATATCTGGAAGAACACCAGTGGCGAAGGCGGCTTCTTGGTCCGTAATTGACGC  
TGAGGCGCGAAAGCGTGGGGAGCAAACAGGATTAGAGACCTCGTAGTCC  
>Otu11755  
CCAGCCTATGGGAGGCTGCAGTTAGGGAACTTTTCCAATGCGCGCAAGCGTGAGAAAGTA  
AGCCAGAGTGTTATTCATAAAATTTGAATAACTTTTGTGTTGTTGTAAAAAGACAGACGAA  
TAAGGAGTGGGCAAGATCGGTGCCAGCCGCCGCGGTAATCCCGACGCTCCAAGTCGCAGC  
CACAAATTATTGGGTCTAAAACATTCGTAGCTTGCCCTTGCAAGTCTTTTGTGAAATCTTAA  
CTCTTAAAGTTGAGGCGTGCAAGAGATACTGCTTGCTTGGGACCGGAAGAAGCAAGAAG  
TATGTTTCGAGGTAGTGGTAAAAATATGTTAATCTTGAACAGACTAACAACAGCGAAGGCAT  
CTTGCTAGTACGGATCTGACAGTGAGGAATGAAGGCTAGGGTCGCGAAACGGATTAGATA  
CCCTAGTAGTCC  
>Otu11758  
CCAGCCTACGGGTCGCTCCAGTGGGGAATTTTGC GCAATGGACGAAAGTCTGACGCAGCA

ACGCCGCGTGGGTGATGAAGGTCTTCGGATTGTAAAACCCCTGTCGTCAGGGACGAAGGTT  
GTGTTTTGAATATGGATGCAACTTGACGGTACCTGGAGAGGAAGCCCCGGCTAACTCTGT  
GCCAGCAGCCGCGTAATACAGAGGGGGCAAGCGTTATTTCGGAATTATTGGGCGTAAGG  
GCGCGTAGGCGGTTTTCGTAAGTAGGATGTGTAATCCCCGGGCTTAACCTGGGAACTGCAT  
CCTAGACTGCGAGGCTAGAGTGCTGGAGAGGGTGGTAGAATTCACGTGTAGCGGCGAAA  
TGCGTAGAGATGTGGAGGAATACCAGTGGCGAAGGCGGCCACCTGGTCAGTAACTGACGC  
TGATGCGCGAAAAGTGTGGGGAGCAAACAGGATTAGATAACCCGAGTAGTCC

>Otu11765

CCTATGGGAGGCAGCAGGCGCGAAACCTTTGCAATGCGCGTAAGCGTGACAGGGGAACTC  
TGAGTGGTAGGGAACCTAAGTTCCCTATCTTTTGACAACCCTAAATCGGTTGTAGAGTAAG  
GTCTGGGCAAGACCAGTGCCAGCCGCCATCGGTATATGCTAAATGCACCATAACCAACGGT  
AAGCGGTAATACTGGCAGAACGAGTGGTATCCACGAATATTGGGTCTAAAGGGTCCGTAG  
CTGGCCTGTAAAGTTCTCTGTGAAATCTTGGAGCTCAACTTCAAGGCGTGACAGGGAATAC  
TGGCGGGCTTGAGAGTGGGGGAGGTTAGGGGTACTCACGGGGTAAGAGTAAAATCTTGTA  
ATCCTGTGAGGACTTCCAGTGGCGTAGGCGCCTAACCAAAACACGTCTGACAGTGAGGGA  
CGAAGGCTAGGAGAACGAATCGGATTAGAAACCCGTGTAGTCC

>Otu11769

CCAGCCTACGGGGTGCTGCAGTGAGGAGTATTGCTCAATGGGCGAAAGCCTGAAGCAGCG  
ACGCCGCGTGAGGGGATGAAATCCGTTAGGATGTAAACCTCTTTTGACAGGGGAAGAATGTT  
CCGAATTCGTCCGGAATTGACGGTACTCTGCGAATAAGCACCGGCAAACTACGTGCCAGC  
AGCCGCGGTAATACGTAGGGTGCAGAGCGTTGTCCGGAATTACTGGGTGTAAAGGGTCCGC  
AGGCGGACATGTAAGTCGATGGTGAATCTCCTGGCTCAACCAGGAACTTGCTGTGCGATA  
CTATGGGTCTTGAGTTCGAGAGAGGATAATGGAATTCATGGTGTAGCGGTGAAATGCGTA  
GAGATCATGAAGAACACCGGTAGCGAAGGCGGTTATCTGGCTCGATACTGACGCTCAGGG  
ACGAAAGCGTGGGTAGCAAACAGGATTAGATAACCCCTGTAGTCC

>Otu11774

CCAGCCTATGGGGGGCTGCAGTGAGGAATATTGCGCAATGGACGAAAGTCTGACGCAGCG  
ACGCCGCGTGAGTGACGAAGCCCTTAGGGGTGTAAAGCTCTTTTGTTGGGGACGAATGCC  
TACTACGGTAGGAGCGACGGTACCCAACGAATAAGGACCGGCTAACTCCGTGCCAGCAGC  
CGCGGTGATACGGGGGGTCCAAGCGTTGTCCGGATTTACTGGGCGTAAAGGGCGCGTAGG  
CGGGATGGTAAGTCGGTGGTGAAATGTGCGGGCTTAACCTGCAGATTGCCTTCGATACTG  
CCGTTCTTGAGTGAAAGGGGAAAGCGGAATACCTGGTGTAGCGGTGGAATGCGCAGAT  
ATCAGGTAGAACACCGGTGGCGAAGGCGGCTTTCTGGTCTTACACTGACGCTGAGGCGCG  
AAAGCGTGGGGAGCAAACAGGATTAGAACCTCGTAGTCC

>Otu11776

CCAGCCTATGGGTGGCTCCAGTGGGGAATCTTGCGCAATGGGGGAAAGCCTGATGGAGCG  
ACGCCGCGTGGGGGATGAATGGCTTCGGCCCGTAAACCCCTGTCATTTGCGATCAAACCT  
CGTTATTTAAAGATGACGAGCTGATAGTAGCGAAAGAGGAAGGGACGGCTAACTCTGTG  
CCAGCAGCCGCGTAATACAGAGGTCCCAAGCGTTGTTCCGATTCACTGGGCGTAAAGGG  
CGCGTAGGTGGTGAGGTAAGTCGGATGTGAAATCTCGGAGCTTAACCTCCGAAACTGCATT  
GGAAACTACCTTGCTCGAGGATTGGAGGGGGGACTGGAATACTTGGTGTAGCAGTGAAAT  
GCGTAGATATCAAGTGGAACACCAGTGGCGAAGGCGAGTCCCTGGACAATTCTCTGACACT  
GAGGCACGAAAGCTAGGGGAGCAAACAGGATTAGATAACCCAGTAGTCC

>Otu11780

CCAGCCTATGGGTGCTGCAGTGGGGAATATTGGGCAATGGGCGAAAGCCTGACCCAGCG  
ACGCCGCGTGGGTGATGAAGGCCTTCGGGTCGTAAACCCCTGTCATGCGGAAAGAACAGC  
CTCGCGACTAATACTCGCGGGTCTGACGGTACCGCAGGAGGAAGCACCGACTAACTCCG  
TGCCAGCAGCCGCGTAATACGAGGGTGCAAGCGTTGTTCCGGAATTATTGGGCGTAAAG  
GGCGCGTAGGCGGTTGCGTTAGTCAGATGTGAAATACTTCGGCTCAACTGGAGAATTGCA  
TTTGATACTGCGTAACCTAGAGTACAGGAGAGGGAAACGGAATTCAGGTGTAGAGGTGAA  
ATTCGTAGATATCTGGAGGAACACCGGTGGCGAAGGCGGTTTCCTGGCCTGATACTGACA  
CTGAGGCGCGAAAGCGTGGGGAGCAAACAGGATTAGAAACCCCTGTAGTCC

>Otu11783

CAGCCTACGGGGCGCAGCAGTCGAGAATTTTTACAAATGGGCGCAAGCCTGATGGAGCGA  
CGCCGCGTGGGGGATGAATGGCTTCGGCCCCGTAAACCCCTGTCATTTGGGATCAATGCGT  
CCAGGTGAATAGCCTGGATGTTGATAGTACCAGAAGAGGAAGGGACGGCTAACTCTGTGC  
CAGCAGCCGCGTAATACAGAGGTCCCAAGCGTTGTTCCGATTTACTGGGCGTAAAGGGT  
GCGTAGGTGGTTCGGTAAGTCTGATGTGAAATTTTCGGAGCCTAACTCCGAAACTGCATTG

GATACTATTTCGGCTAGAGGTTGGGAGGGGAGACTGGAATTCTCGGTGTAGCAGTGAAATG  
CGTAGATATCGAGAGGAACACCAGTGGCGAAGGCGAGTCTCTGGACCAATCCTGACGCTG  
AGGCACGAAAGCCAGGGGAGCAAACGGGATTAGATACCCGAGTAGTCC

>Otu11785

CCAGCCTATGGGGTGCTCCAGCAAGGAATTTTGTACAATGGGCGAAAGCCTGATACAGCG  
ACGCCGCGTGAAGGATGAAGACCTTAGGGTTGTAACTTCTTTTCCCAGGGAAGAATAAT  
GACGGTACTTGGGGAATAAGCTTCGGCTAACTACGTGCCAGCAGCCGCGGTAATACGTAG  
GAAGCGAGCGTTATCCGGATTTATTGGGCGTAAAGAGTGCGCAGGCGGTCCTTCAAGTCG  
AATGTTAAACTCCCGGCTTAACTGGGAGAGGCCATTTCGATACTGTTGGACTCGAGGGCT  
GTAGGGGAGATGGAATTCCCGGTGTAGCGGTGAAATGCGTAGATATCGGGAGGAACACC  
AGTGGCGAAAGCGGTCTCCTTGGCAGTTTCTGACGCTTAAAGCACGAAAGCGTGGGGAGCA  
AACAGGATTAGAAACCCGCGTAGTCC

>Otu11787

CCAGCCTATGGGATGCACCAGTGGGGAATATTAGACAATGGGCGAAAGCTTGATCTAGCT  
ATACTTCGTGGGGGACGAAAGCCTCAGTTGTAACTCCTATATCGATAATGAAAATAATG  
ATTGTAATTATAAATGAAGCCCCGGTAAATATCTGTGCCAGCAGCCGCGGTGATACAGGG  
GGGCGAGTATTATTCTACATGACTGGGCGTAAAGGATATGTAGGCGGTTTTTTAAATAT  
TGAAAGAAAAGCTATAAAAAAATTATGGATAGTTTCAATATATTGTAAACTTTGAGTTT  
ATAGGAGATATTAGAACCCGGTAGAGTAAATGTGAAATGTTTTGAGACTAGGGGGAATTC  
CGAATAGCGAAAGCATTTATCTTGTAAACTGACGCTGAAATATGAAGGTGTGGGTAGC  
GAATGGGATTAGAGACCCTAGTAGTCC

>Otu11795

CCAGCCTACGGGTCGCTGCAGTAACGAATCTTCCGCAATGCACGAAAGTGTGACGGAGCG  
ACGCCGCGTGTGGGACGAAGTTCTTCGGAATGTAAACCACTGTCAGGGGTTAGAAAGTTC  
TGATCAACCCAGAGGAAGGCACGGCTAACTCTGTGCCAGCAGCCGCGGTAATACAGAGA  
CTGCAAGCGTTATTTCGGATTCAGTGGGCGTAAAGGGTGCGCAGGTGGCCAAGTGTGTGAG  
GCGTGAAAGCCCCGAGCTCAACTCCGGAATTGCACCTCAAACCTACATGGCTAGAGCATTG  
GAGAGGGGAGCAGAATTCACGGTGTAGCGGTGAAATGCGTAGATATCGTGAGGAGTACCA  
GAGGCGAAGGCGGCTCCCTGGACAATAGCTGACACTCAGGCACGAAAGCGTGGGGAGCAA  
AAGGGATTAGAGACCCTTGTAAGTCC

>Otu11797

GGACTACAGGGGTATCTAATCCCTTTTGCTCCCCATACTTTCGAGCCTGAGTGTGAGGAT  
TTGTCCAGCGGGTTGCCTTCGCCGTGGTGTTCCTCCAGATATCTACGCATTTACCGCT  
ACACCTGGAATTCGCCCCGCTCTCCAATCCTCCAGACAAGTAGTTTCGGGTGCAGTTCC  
GGAGTTAAGCCCCGGGATTTACACCCGACACACCTGCCACCTGCGCTCCCTTTACGCC  
CAGTGAATCCGAGTAACGCTTGCAGTCTCTGTATTACCGCGGCTGCTGGCACAGAGTTAG  
CCACTGCTTCCTCTCCTGGTTGAATCAGCCCGGCTCTTCGCCGGGGTTTTGTCCCAGGTG  
ACAGGGGTTTTACAATCCGAAGACCTTCATCCCCCACGCGGCGTCGCACCATCAGGGTTGC  
CCCCATTGTGAATGATTCGAAACTGCTGCACCCCGTAGGCTGG

>Otu11803

CCAGCCTATGGGGGGCAGCAGGTACAGCCGGCTGTCTCCACATGCCCCGATGTGCACATC  
CCGGCCCTTGAAGATGCAGACGTTTCATCGTCGTCGCCATCCGCGTCGCCTTCCGGTCATT  
CTCGTGGGAGTCGTAAAGCGACATGTTGGCCGCAAAGAAAATCTCCCGCAGGAGGGCCTT  
TGCGCCGGTGTGAGGGCTGCACTCCTGGAATTCCTGATCGCAGTCTCAACCGCCAGACG  
GCTCGCCACATCCCCGCTCCCATGCCCGCCACGCCGTCGGCAATAATCGCGATCGACCC  
CCGCGACTGCCGCTCGTCAGGCTCCTCGGGTTCCCAAAGCCGGCATAATCCTCGTTTTT  
CGGCCGGACCGGCCCTTCGAGGAGAGGGTGAAGACGTTTAGTTCCATGGAGAACCAGAG  
GAAATAAGGGAATCACGCGTCATAAGGCAATCGTCGATTAGATACCCCCGTAGTCC

>Otu11806

CCAGCCTATGGGGTGACAGCAGTGAGGAATTTTCCACAATGGACGAAAGTCTGATGGAGCA  
ACGCCGCGTGCAGGATGACGGCCTTCGGGTGTAACTGCTTTTTCTAGTGAAGATTATG  
ACGGTAGCTAGAGAATAAGGATCGGCTAACTACGTGCCAGCAGCCGCGGTAATACGTAGG  
ATCCAAGCGTTATCCGGAATTACTGGGCGTAAAGCGTACGTAGGTGGAGACTTAAGTGAG  
ATGCGAAATCTGGCGGCTCAACCGTCTAGACTGTATCTCATACTGGGTTTCTTGAGGTTG  
GCAGAGGCAAGTGGAATTTCCGGTGTAGCAGTGAATGCGTAGATATCGGAAGGAACACC  
AATGGCGAAGGCAGCTTGCTGGGCCACACCTGACACTGAGGTACGAAAGCGTGGGGAGCG  
AACAGGATTAGATACCCGCGTAGTCC

>Otu11812



CCAGCCTATGGGTCGCAGCAGTAAGGAATATTGGTCAATGGACGAAAGTCTGAACCAGCC  
ACGCCGCGTGAGGGATGAAGGCCCTTCGGGTGTAAACCTCTGTCACCGGGGAAGAAACGC  
TTCAAGTTAACAGCTTGAAGCCTGACTTAACCCGGAGAGGAAGCAGTGGCTAACTCTGTG  
CCAGCAGCCGCGGTAATACAGAGACTGCAAGCGTTATTTCGATTCACTGGGCGTAAAGGG  
TGCGCAGGCGGCCAAGTGTGTTAGGCGTGAAAGCCCGGGCTTAACCCCGGAATTGCACC  
TAAACTACATGGCTAGAGCATTTGGAGAGGGTAGCGGAATTCACGGTGTAGCAGTGAAAT  
GCGTAGATATCGTGAGGAACACCAGAGGCGAAGGCGGCTACCTGGACAATTGCTGACGCT  
CAGGCACGAAAGCGTGGGGAGCAAAGGGATTAGAAACCCGCGTAGTCC

>Otu11814

CCAGCCTACGGGTCGCTGCAGTAGGGAATTTTCCACAATGGGCGAAAGCCTGATGGAGCA  
ACGCCGCGTGACAGGATGAATGCCTTCGGGTGTAAACTGCTTTTATATGTGACGATTATG  
ACGGTAGCATATGAATAAGGATCGGCTAACTCCGTGCCAGCAGCCGCGGTCATACGGAGG  
ATCCAAGCGTTATCCGGAATTACTGGGCGTAAAGAGTTGCGTAGGCGGCATCGTAAGCGA  
GTAGTGAAAGCGTGTGGCTCAACCACATATACATTACTCGAACTGCGAAGCTAGAGGACA  
AGAGAGGTACCTGGAATTCCTAGTGTAGGGGTGAAATCCGTAGATATTAGGAAGAACACC  
GATGGCGTAGGCAGGGTACTGGCTTGTTCCTGACGCTCAGGCACGAAAGCGTGGGGAGCG  
AACGGGATTAGAGACCCGAGTAGTCC

>Otu11817

CCAGCCTATGGGGGGCACCAGTCGAGGATCTTCCGCAATGAGCGCAAGCTTGACGGAGCG  
ACGCCGCGTGTTGGGATGAAGGCCCTTCGGGTGTAAACCACTGTCGCCGTTATGAAAGGG  
GCTGGTGTTAACAGCATCAGCAACTGACAAAGGCCGGATAGGAAGCCACGGCTAACTTCG  
TGCCAGCAGCCGCGGTAAGACGAAGGTGGCGAGCGTTGTTTCGGAATCACTGGGCATAAAG  
CGCACGTAGGCGGCGGCGTAAGTCGGATGTGAAATCCCTCGGCCCCAACCGAGGAACTGCG  
TCCGATACTGCGTTGCTTGAGGACCAAAGGGGTGCATGGAATTCCCGGTGGAGCGGTGAA  
ATGCGTTGATATCGGGAGGAACGCCGCGCGCGAAAGCGGTGCACTGGTTGGTTTCTGACG  
CTGAGGTGCGAAAGCCAGGGGAGCAAACGGGATTAGAAACCCAGTAGTCC

>Otu11818

CCAGCTACGGGTTCGCACCAGTGAAGAATCTTGGGCAATGGACTAACGTCTGACCCAGCGA  
GAATCCATACGTGAAAGAAAGGCACAAGTTGTAAAACGCGAAATTACCAGCACAGATAAT  
AACTTAGCTGATGAATGAAGTACCTGCCAACCTCGTGCCAGCAGCAGCGGTAATACGGGG  
GGTGCGTGCGTTATTCGTTTTGATTGGGTGTATAGGGTACGTAGGCTAGTATCTATTAAC  
ATAATGTTAAATCTTGGGTATCTTACACAAGGAAACCTTATGAAAAATTTACTATGTGTT  
TAGAGCGGGTTGGTTAAATTACTCAAGTAATGTGGGGTAAAATCCCTAGAAATGAGTAGG  
AATTCGTTGGGCGAAAGCATCTTACTTGCCTAACATGCGCTGAGAGTACGGAAGCGTAG  
GTATCAAACAGGATTAGAAACCCAGTAGTCC

>Otu11821

CCAGCCTACGGGAGGCACCAGTGGGGAATCTTGACACAATGGGGGCAACCCTGATGCAGCG  
ACGCCGCGTGAGCGATGAAGCCCTTCGGGTGTAAAGCTCTTTCGGCAGGGAAGACAATG  
ACGGTACCTGCAGAAGCAGCTGCGGCTAACTACGTGCCAGCAGCCGCGGTAATACGTAGG  
CAGCAAGCGTTGTTTCGAGTTACTGGGCGTAAGGGGTGTGTAGGCGGCTTTCAAAGTTTG  
TTGTGAAATCTCCCGGCTCAACCGGGAGGGTGCGCCGAATACTGAAGGGCTAGAGTGTGG  
GAGAGGAAAGTGGAATTCCTGGTGTAGCGGTGAAATGCGTAGATATCAGGAGGAACACCG  
GTGGTGTAGACGGCTTTCTGGACCATAACTGACGCTGAGACACGAAAGCGTGGGTAGCAA  
ACAGGATTAGAGACCCGCGTAGTCG

>Otu11829

CCAGCCTACGGGGGGGCTCCAGTCGAGGATCTTTCGGCAATGGGCGCAAGCCTGACCGAGCG  
ACGCCGCGTGTCGATGAAGGCCCTTCGGGTGTAAAGCACTGTCGAGGGGAGGAAGCTC  
CGCAAGGAGTTGACCTATCCCTGGAGGAAGCACGGGCTAAGTTTCGTGCCAGCAGCCGCGG  
TAAGACGAACCGTGCAACGTTGTTTCGGAATCACTGGGCTTAAAGGGCGCGTAGGCGGGC  
AACCAAGTCTGGGGTGAAATCTTTCGGCTTAACCGGAAAATAGCCCTGGATACTGGCTGT  
CTGGAGGGAGGTAGGGGCATGTGGAACCTCCGGTGGAGCGGTGAAATGCGTAGATATCGG  
AAGGAACGCCGTTGGCGAAAGCGACGTGCTGGACCTCTACTGACGCTGAGGCGCGAAAGC  
CAGGGGAGCAAACGGGATTAGATACCCGTGTAGTCC

>Otu11834

CCAGCCTACGGGAGGCTCCAGTAAGGAATATTGGTCAATGGGCGGAAGCCTGAACCAGCC  
ATGCCGCGTGACAGGAAGACGGCCCTACGGGTGTAAACTGCTTTTGTACGGGAATAAACC  
CCTCTACGTGTAGGGGGCTGAATGTACTGTAAGAATAAGGATCGGCTAACTCCGTGCCAG  
CAGCCGCGGTAATACGGAGGATCCAAGCGTTATCCGGATTTATTGGGTTTAAAGGGTGCG

TAGGCGGTTTATTAAGTCAGGGGTGAAAGACGGCAGCTTAACTGTTCGAGTGCCTTTGAT  
ACTGATGAACCTGAATGTACTAGAAAGTAGGCGGAATGTGACAAGTAGCGGTGAAATGCAT  
AGATATGTCACAGAACACCGATTGCGAAGGCAGCTTACTATGGTATTATTGACGCTGAGG  
CACGAAAGCGTGGGGATCAAACAGGATTAGAAACCCTCGTAGTCC

>Otu11836

CCAGCCTACGGGTCGCTGCAGTCGAGGATCTTTCGGCAATGGGCGCAAGCCTGACCGAGCG  
ACGCCGCGTGTGCGATGAAGGCCTTCGGGTGTAAAGCACTGTTCGAGGGGGAGGAAAGCC  
GCAAGGTCTGACCTATCCCTGGAGGAAGCACGGGCTAAGTTCGTGCCAGCAGCCGCGGTA  
AGACGAACCGTGCGAACGTTGTTTCGGAATCACTGGGCTTAAAGGGCGCGTAGGCGGTTTA  
TCAAGCCCAGGGTGAAATCTTTCGGCTTAACCGGAAAAGTGCCTTGGAATACTGGTGAAC  
GGAGGGAGGTAGGGGCAGATGGAACCTCCGGTGGAGCGGTGAAATGCGTTGATATCGGAA  
GGAACGCCGGTGGCGAAAGCGATCTGCTGGCCCTCTTCTGACGCTGATGCGCGAAAGCTA  
GGGGAGCAAACGGGATTAGATACCCCTGTAGTCC

>Otu11837

CCAGCCTATGGGTCGACACCAGTAGGGAATCTTTCGCAATGGGCGAAAGCCTGACGCAGCC  
ATGCCGCGTGAATGATGAAGGTCTTAGGATTGTAAATTCTTTCAGCAGGGAAGATAATG  
ACTGTACCTGCAGAAGAAGCCCCGGCTAACTTCGTGCCAGCAGCCGCGGTAATACGAAGG  
GGGCTAGCGTTGCTCGGAATTACTGGGCGTAAAGGGCGCGTAGGCGGGTATTTAAGTCAG  
AGGTTAAATCCCAGGGCTCAACCCTGGAACCTGCCTTTGATACTGGATATCTAGAGTTCGG  
GAGAGGTGTGTGGAACCTCCGAGTGTAGAGGTGAAATTCGTAGATATTTCGAAGAACACCA  
GTGGCGAAGGCGGCTCACTGGCCCGATACTGACGCTGAGGCACGAAAGCGTGGGGAGCAA  
ACAGGATTAGAGACCCCTCGTAGTCC

>Otu11838

CCAGCCTATGGGGGGCTCCAGGCATAAACGGCGATGACCAGCGCGCAAACCGCGCCTAGA  
ACAGCGACACGCCTCCATGGGGCAAGGGGGCGGTACGGCAACTGGCGTGGAACCTCCA  
CGGCCCGCCACCTCCTCCTTCTGGGATCGTTTCGGCCATACGGTCTGCCTGACGAGAATGA  
ACCTTTTCTGCCTGCATTGAAGCAGTTTTTTCTTTTCGGTTGGCCCCGGGCGATCATTGCC  
GCACGCCGAGGCCTTGTTGGACGACAACCTTGCTTGATGCTCCGGGCAAAGGTGGCCGTG  
GATTTTACACGTGACCGCCAGTCACTACGCCGTAGAAAAGAACCATGACCTCGGACCCAG  
CCAATCCGACGCCGCGCTACGTCCCCTACAAGCCCCTGTACATCACGCGGTTTTTTTACC  
TCGGCTCCAAGCTCTTCCGGATCCGGGAAGCTCTCATCGGGCTATTTGGAGAGGATTAGA  
GACCCAGTAGTCC

>Otu11842

CCAGCCTACGGGTGGCAGCAGTGGGGAATCTTGGACAATGGGGGCAACCCTGATCCAGCG  
ATGCCGCGTGTGTGAAGAAGGCCTGCGGGTGTAAAGCACTTTTGTTGGGAAGAAGGGT  
AGAGAGTGAATAGCTTTCTGCTTTGACGGTACCGACAGAATAAGCACCGGCTAACTCTGT  
GCCAGCAGCCGCGGTAATACAGAGGTGCAAGCGTTAATCGGAATGACTGGGCGTAAAGG  
GCGAGTAGGCGATTGTATAGGTGTGGTGTGAAAGACACGGGCTCAACCTGTGAATGTGCG  
CGCAAACGGTATGACTAGAGAGCAGTAGAGGGGAGTGGAATTTCCGGAGGAGCGGTGAAA  
TGCGTAGATCTCGGAAGGAACACCAGTGGCGAAGGCGACTCCCTGGACTGCAACTGACGC  
TGAGGTGCGAAAGCGTGGGGAGCAAACAGGATTAGATACCCCTCGTAGTCC

>Otu11849

CCAGCCTATGGGATGCAGCAGTGGGGAATTTTGGACAATGGGGGAAACCCTGATCCAGCA  
ATGCCGCGTGAGTGAAGAAGGTCTTTCGGATTGTAAAGCTCTTTCGACGGGGACGATGATG  
ACGGTACCCGTAGAAGAAGCCCCGGCTAACTTCGTGCCAGCAGCCGCGGTAATACGAGGG  
GGGCAAGCGTTGTTTCGGAATTATTGGGCGTAAAGGGTGCCTAGGCGGTCTGATAAGTCTG  
ATGTGAAATCGATGGGCTCAACCCATCGTCTGCATTAGAACTGTCGGGCTTGAGTGTGG  
GAGAGGTGAGTGGAATTTCCGGTGTAGCGGTGAAATGCGTAGATATCGGAAGGAACACCT  
GTGGCGAAAGCGGCTCACTGGACCATTACTGACGCTGATGCACGAAAGCTAGGGGAGCAA  
ACAGGATTAGAGACCCCTTGTAGTCC

>Otu11855

CCAGCCTACGGGGTGCTGCAGTGGGGAATATTGGACAATGGGGGCAACCCTGATCCAGCG  
ATGCCGCGTGTGTGAAGAAGGCCTGCGGGTGTAAAGCACTTTCGGTGGGGAGGAGGACT  
ATGAGGTTAAGAGCTATATAGTTGGACGTTACCCACATAAGAAGCACCGGCTAACTCCGT  
GCCAGCAGCCGCGGTAATACGGAGGGTGCAAGCGTTAATCGGAATTACTGGGCGTAAAGG  
GTGTGTAGGCGGTTTAATAAGTTAAGTGTGAAATTTCCGGGCTCAACCTGGGGTAGTCAT  
TTAAGACTGTTAGACTAGAGTATGGGAGAGGGTAGTGGAATTTCCGGTGTAGCGGTGAAA  
TGCGTAGAGATCGGAAGGAACACCAGTGGCGAAGGCGGCTACCTGGCCTAATACTGACGC

TGAGGCACGAAAAGCGTGGGGAGCAAACAGGATTAGATACCCTTGTAGTCC

>Otu11864

CCAGCCTATGGGTGGCAGCAGTCGAGAATCTTTTCGCAATGGGCGCAAGCCTGACGAAGCG  
ACGCCGTGTGAGTGAAGAAGGCCTTCGGGTGTAAAGCTCTTTTCGCTAGGGAACAAGAGA  
TGTGGCCTAATACTCCACAAATTTGATGGTACTTGGTAAAGAAGCACCGGCTAACTCCGT  
GCCAGCAGCTGCGGTAATACGGAGGGTGCAAGCATTGATCGGAATTACTGGGCGTAAAGG  
GCGCGTAGGCGGTGAGATAAGTCAGATGTGAAATTCGGGGCTCAACCCCGGAGCTGCAT  
TTGAAACTATCTGACTCGAGGACAGTTAGGGTAAACGGAATTCACGTGTAGCGGTGAAA  
TGCGTAGATATGTGGAAGAACACCGGTGGTGAAGACGGCTTACTGGGCTGTAAGTACGCG  
TGAGGCGCGAAAAGCTAGGGGAGCAAACAGGATTAGAGACCCGTGTAGTCC

>Otu11866

CCAGCCTACGGGGTGCACCAGTGGGGAATATTGGACAATGGGCGCAAGCCTGACCGAGCG  
ACGCCGCGTGGAGGATGAAGGCCTTCGGGTGTAAACTCCTGTGAGGGGGAGGAAGTCC  
CGAGCGATCGGGATTGACCGATCCCTGGAGGAAGCACGGGCTAAGTTCGTGCCAGCAGCC  
GCGGTAAGACGAACCGTGCGAACGTTATTTCGGAATCACTGGGCTTAAAGCGCGTGTAGGC  
GGATGGGAACGTCGGTTGCTGAAAGCCCCCGGCTCAACCGGGGAAGTGGCGCCGAAACGC  
CCCGTCTGGAGGGACGTAGGGGGACCTGGAACCTCCGGTGGAGCGGTGAAATGCGTTGAG  
ATCGGAAGGAACGCCCGTGGCGAAAGCGAGGTCCTGGACGTCTACTGACGCTGAGACGCG  
AAAGCTAGGGGAGCGAACGGGATTAGAGACCCCTAGTCC

>Otu11872

CCAGCCTATGGGGTGCAGCAGTCGAGAATCATTCGCAATGGGCGAAAAGCCTGACGATGCG  
ACGCCGTGTGCGTGATGAGGGCCTTCGGGTGTAAAGCGCTTTCGCCCCGGAACAAGAGA  
AGCAGGCTAATATCCTGCGGATTTGAGGGTACCGGGTAAAGAAGCGCCGGCTAACTCCGT  
GCCAGCAGCTGCGGTAATACGGAGGGCGCGAGCATTAATCGGATTTATTGGGCGTAAAGG  
GCGCGTAGGCGGAGATGTAAGTCAGATGTGAAATCCCGGGGCTCAACCCCGGAACAGCAT  
TTGATACTGCTTCTCTCGAGGGTAGGCGGAGAAAATGGAATTCACAAAGTAGCGGTGAAA  
TGCGTAGATATGTGGAAGAACACCGGTGGCGAAGGCGATTTTCTAGCTTATACCTGACGC  
TGATGCGCGAAAAGCAAGGGGATCAAACAGGATTAGATACCCGTGTAGTCC

>Otu11876

GGACTACAGGGGTTTCTAATCCCGTTTGCTCCCCTGGCTTTCGCGTCTCAGCGTCAGGAC  
ATCCCCAGCGAGCTGTTTTTACCATTGGCGTTCCAAACGATATCTACGCATTTACCCGCT  
CCACCGTTTGTTCGCTCGCCCCTAGATGCCTCAAGAAGACCAGTATACCCAGCAGTTCC  
CGGGTTGAGCCCGGGGATTTTACAAGGTACTTAGCCCTCCGCCTACACGCGCTTTAAGCC  
CAGTGATTCCGCCTAACGCTCGGGGCCTCTGTCTTACCGCGACTGCTGGCACAGAGTTAG  
TCGCCCCTTCTCTGGGGATCCTCAGAACTTGGTATCCCCTGACAGAAGTTTACATTCCG  
AAGAACTTCGTCTCCACGCGGCGTCTCGTCCGTACACTTTCGTGCATTGCGGAAGATT  
GTTACTGGTGCCCCCATAGGCTGG

>Otu11879

CCAGCCTATGGGTGCTGCTGAGTCGAGAATTTTTCTCAATGGGGGAAACCCTGAAGGAGCG  
ACGCCGCGTGGAGGATGACGGTCTTCGGATTGTAAACTCCTGTCATGAGGGAACAACTT  
ACGCCAGTAAGTACGGCGTGATTGATAGTACCTCAAGAGGAAGAGACGGCTAACTCTGTG  
CCAGCAGCCGCGGTAATACAGAGGTCTCAAGCGTTGTTTCGGATTTCATTGGGCGTAAAGGG  
TGCGTAGGCGGCGAGGCAAGTCAGGTGTGAAATCCCGGAGCTTAACTCCGGAAGTGCAT  
TGATACTGCCTTGCTCGAGGACTGGAGAGGAGATCGGAATTCACGGTGTAGCAGTGAAT  
GCGTAGATATCGTGAGGAAGGCCAGTGGCGAAGGCGGATCTCTGGACAGTTCTTGACGCT  
GAGGCACGAAGGCCAGGGGAGCAAACGGGATTAGATACCCCGTAGTCC

>Otu11885

CCAGCCTATGGGATGCAGCAGTAAGGAATATTGGTCAATGGGCGGAAGCCTGAACCAGCC  
ATGCCGCGTGCAGGAAGACGGCCCTACGGGTGTAAACTGCTTTTGTACCGGAATAAACC  
TCAATTTCGTGAATTGAGCTGAATGTACGGTAAGAATAAGGATCGGCTAACTCCGTGCCAG  
CAGCCGCGGTAATACGGAGGATCCAAGCGTTATCCGGATTTATTGGGTTTAAAGGGTGCG  
TAGGCGGCCTTGTAAGTCAGGGGTGAAAGACGGTAGCTCAACTATCGCAGTGCCTTTGAT  
ACTGCAGGGCTTGAATGTACTTGAGGTAGGCGGAATGTGACAAGTAGCGGTGAAATGCAT  
AGATATGTACAGAACACCAATTGCGAAGGCAGCTTACTATGGTTTGATTGACACTGAGG  
CACGAAAGCGTGGGGATCAAACAGGATTAGAGACCCCTGTAGTCC

>Otu11888

CCAGCCTATGGGAGGCAGCAGTAGGGAATATTGCGCAATGGAGGAAGCTCTGACGCAGCG  
ACGCCGCGTGGGTGATGAAGGCCTTCGGGTGTAAGCCCTGTGCGAGGGGAAGAAAAAC

ATACTCGATAATAATAAGTATGCTTGACGGTACCCTTAAAGGAAGCACCGGCTAACTACG  
TGCCAGCAGCCGCGGTAAATACGTAGGGTGCAAGCGTTGTTTCGGAATCATTGGGCGTAAAG  
CGCGCGTAGGGCTGTTAATTAAGTCGGATGTGAAATCCCTGGGCTCAACCGAGGAAGTGCA  
TTCGAAACTGATTAGCTCGAAGACGGTAGAGGAAGGTGGAATTCCTTGTGTAGAGGTGAA  
ATTCTGTAGATATTAGGAGGAATACCAGTGGCGAAGGCGGCCTTCTGGACCGTTCTTGACG  
CTGAGGCGCGAAAGCGTGGGTAGCAAACAGGATTAGATACCCTTGTTAGTCC

>Otu11893

CCAGCCTACGGGTTGCTGCAGCTCTCGTTGCGCTTGGAGTAGTCGGCGATGACCAGGAAG  
CTCACATCGTCGGACGGGGTGAGCAGGTACTGGCCGCGTACCGTGTAGACATTGCGATTG  
TTGGAATCGCCGTCGGTGTTCGGACCGAGACCGGTATCGACGGGGGAGAAGCCGTCGCGT  
TTTTGGTAGCCCGCTACAGGCGGAAGGCGGATATGCCGCCAACGGCTCCGGTGATGGAC  
CCGGAGATTTTCGCGGTCTGTTGTAATTCCTGAAGGTGATTTACCCCGTCACCCCGAACGTG  
GTCGAGGGCCGCTTGGTTCACGATGTTAATGACGCGCCGTCATCGTTGTTCTTGCCGAACAAC  
TCTCCCTGCGGGCCCTCGAGAATTTTCGATGCGATCGATTTCTCCGAGGTTGCCGAAGCCC  
ACCCCGTTGCGGGGGCGGTAGACGCCGTCGATGACGATGCCACGGAGGATTAGATACCC  
TTGTAGTCC

>Otu11904

CCAGCCTACGGGTCGCTGCAGTTCAGAATATTCGGCAATGGACGAAAGTCTGACCGAGCG  
ACGCCGCGTGAGGGATGAAGGCCCTATGGGTGTAAACCTCTTTTCGCGATTTAACAAGTC  
ATAGTCATTTAACAATGGTTATGTTGAGCAAGGATCGTAAAGAAGCCCCGCTAATCAC  
GTGCCAGCAGCGGCGTAATACGTGAGGGGCGAACGTTGTTTCGGTGTCACTGGGCTTAA  
GGGTGCGTAGGTGTTGCGTAAGTAACGTGTGAAATCCCTCGGCTTACCCGGGGAATTGC  
ATGTTTACTGCGTGACTTGAGGTCTAAAGGGGAAAAGGGAAGTCCAGGTGTAGCGGTGA  
AATGCGCAGATATCTGGGGGAAGGCCGGCGGCGAAGGCGCTTTTCTGGTTAGATCCTGAC  
ACTGAGGCACGAAAGCGTGGGGAGCAAACAGGATTAGATACCCCGGTAGTCC

>Otu11905

CCAGCCTATGGGAGGCTCCAGTGGGGAATATTGGACAATGGGGGCAACCCTGATCCAGCA  
ATGCCGCGTGTGTGAAGAGGGTCTTCGGATTGTAAAGCACTTTTGGCAGGGACGATAATG  
ACGGTACCCCGCAGAAGAAGCTCCGGCTAACTTCGTGCCAGCAGCCGCGGTAATACGAAGG  
GGGCTAGCGTTGTTTCGGAATTACTGGGCGTAAAGCGCGCGCAGGCGGCCTTTCAAGTCAG  
GGGTGAAAGCTCGGAGCTCAACTCCGGAATTGCCTTTGAAACTGCAAGGCTTGAGTACGG  
GAGAGGTGAGTGGAATTCACAGTGTAGAGGTGAAATTCGTAGATATTGGGAAGAACACCG  
GTGGCGAAGGCGGCTCACTGGCCCGTGACTGACGCTCAAGCGCGACAGCGTGGGGAGCAA  
ACAGGATTAGAAACCCCGTAGTCG

>Otu11912

CCAGCCTATGGGTCGCGAGCAGTGGGGAATATTGGACAATGGGGGCAACCCTGATCCAGCG  
ATGCCGCGTGTGTGAAGAAGGCCTGAGGGTTGTAAAGCACTTTTCGGTTGGGAAGAGGGCA  
TTTTTGCTTAATACGCAAGAGTGTGACGTTACTAACAGAAGAAGCACCGGCAAACCCTG  
TGCCAGCAGCCGCGGTAATACAGGGGGTGCAAGCGTTAATCGGAATGACTGGGCGTAAAG  
GGCACGTAGGCGGCCATGTAAGTTGGGTGTAAAGACCAGGGCTTAACCTTGGGAGTGCA  
TTCAAGACTGTGTGGCTAGAAATATAGAAGAGGTTGATGGAATTTCCGGTGTAGCGGTGAA  
ATGCGTAGAGATCGGAAGGAACACCAGTGGCGAAGGCGATTGGCTGGTCTAATATTGACG  
CTGAGGTGCGAAAGCGTGGGGAGCAAACAGGATTAGAAACCCGTGTAGTCC

>Otu11917

CGAGCCTACGGGTGGCTGCAGTAGGGAATATTGCACAATGGAGGAAACTCTGATGCAGCG  
ACTCCGCGTGAGTGATGAAGGACTTCGGTTCGTAAAGCTCTGTTGCAAGGGAAAAAGAAA  
GTGATTGTACTTTGCGAGAAAGGGTCGGCTAACTTCGTGCCAGCAGCCGCGGTAAGACGA  
GGGACCCTAGCGTTGTTTCGGAATCATTGGGCGTAAAGCGGTGTAGGTGGCTTTGTAAGT  
CAGGTGTGAAAGCCCGGGGCTCAACCTCGGAAGGGCATTGATACTGCGAAGCTTGAGTG  
CTGGAGAGGCTACTAGAATTCCTGGTGTAGTGGTGAATACGTAGATATCAGGAGGAATA  
CCAGAGGCGAAGGCGGCTAGCTGGCCAGACACTGACACTTAGACCCGAAAGCGTGGGGAT  
CAAACAGGATTAGGACCCGCGAGTCC

>Otu11925

CCAGCCTATGGGGGGCACCAAGTTTCGAATCATTCACAATGGGCGAAAGCCTGATGGTGCA  
ACGCCGCGTGGGGGACGAAGGTCTTCGGATTGTAAACCCCTGTCATTGAGGAACAAAACC  
CGGACTCATACTCCGGCTTGAGTTAACTCAAAGAGGAAGTAGTGGCAAACTCCGTGCCAG  
CAGCCGCGGTAATACGGAGACTACGAGCGTTACTCGGATTCAGTGGGCGTAAAGGGTGCG  
CAGGCGGCCGAATGTGTTGGGTGTGAAATCCTGGGGCTTAACCTCAGGGCTGCGCTCAA

ACTGTTCCGGCTAGAGTCTCGGAGAGGTAAGCGGAATTCCTAGTGTAGCAGTGAATGCGT  
AGATATTAGGAGGAACACCAAAGGCGAAGGCAGCTTACTGGACGAGTACTGACGCTCATG  
CACGAAAGCGTGGGGAGCAAAAAGGATTAGATACCCGCGTAGTCC

>Otu11936

CCAGCCTACGGGGGGCTCCAGTGGGGAATATTGGACAATGGGCGCAAGCCTGATCCAGCA  
ATGCCGCGTGAGTGAAGAAGGTCTTCGGATTGTAAAGCTCTTTCGACGGGGACGATGTTG  
ACGGTACCCGTAGAAGAAGCCCCGGCTAACTTCGTGCCAGCAGCCGCGGTAATACGAAGG  
GGGCTAGCGTTGCTCGGAATGACTGGGCGTAAAGGGCGCGTAGGCGGCGATGGTAGTCAG  
GCGTGAAATTCTGGGCTCAACCTGGGAATGCATTTGAGACTGCATGGCTAGAGTATCG  
AAGAGGGAAGTGGAATTTCCGGTGTAGCGGTGAAATGCGTAGATATCGGAAGGAACACCA  
GTGGCGAAAGCGACTTCCTGGTCTGAATACTGACGTTTCATGTGCGAAAGCGTGGGGAGCAA  
ACAGGATTAGAAACCCGAGTAGTCC

>Otu11942

CCAGCCTACGGGGTGCAGCAGTCGAGAATTTTTTCAACAATGGACGAAAGTCTGATGGAGCG  
ACGCCGCGTGAGGATGAAGGTTTTTCGGATTGTAAACTCCTGTCACTGCAGAACAAGGTA  
ACGCCAGTTAACAGCCGGCGTTATTGATGGTATGCGAAGAGGAAGGGACGGCTAACTCTG  
TGCCAGCAGCCGCGGTAATACAGAGGTCCCAAGCGTTGTTTCGGATTCACTGGGCGTAAAG  
GGTGCCTAGGCGGTAGGGTAAGTCTGTTGTGAAATCTCCGAGCTTAACTCGGAAACTGCA  
ATGGAAACTATCCGACTAGAGGAATGGAGGGGAGACTGGAATACTTGGTGTAGCAGTGAA  
ATGCGTAGATATCAAGTGGAACACCAGTGGCGAAGGCGAGTCTCTGGACATTTCTTGACG  
CTGAGGCACGAAAGCGTGGGGAGCAAACAGGATTAGATACCCTAGTAGTCC

>Otu11954

CCAGCCTACGGGGTGCAGCAGTCGAGAATTTTTCTCAATGGGGGAAACCCTGAAGGAGCG  
ACGCCGCGTGAGGATGAAGGTCTTCGGATTGTAAACTCCTGTCACTAGGGAACAATGGC  
GAGCGATTAACTGTGCTTGTGTTGATAGTACCTGAAGAGGAAGAGACGGCTGACTCTGTG  
CCAGCAGCCGCGGTAATACAGAGGTCTCAAGCGTTGTTTCGGATTCACTGGGCGTAAAGGG  
TGCGTAGGCGGCGGGGCAAGTCAGGTGTGAAATCTCGGGGCTCAACTCCGAAACTGCACT  
TGATACTGCCTTGCTAGAGTACTGGAGAGGAGATTGGAATTTCCGGTGTAGCGGTGAAAT  
GCGTAGATATCGGAAGGAACACCTGTGGCGAAGCGGCTCACTGGACCATAACTGACGCT  
GATGCACGAAAGCTAGGGGAGCAAACAGGATTAGAAACCCCCGTAGTCC

>Otu11961

CCAGCCTACGGGACGCACCAGTGGGGAATATTGGACAATGGGCGAAAGCCTGATCCAGCA  
ATGCCGCGTGAGTGATGAAGGCCTTAGGGTTGTAAAGCTCTTTCGCACGCGACGATGATG  
ACGGTAGCGTGAGAAGAAGCCCCGGCTAACTTCGTGCCAGCAGCCGCGGTAATACGAAGG  
GGGCTAGCGTTGTTTCGGAATTACTGGGCGTAAAGGGCGCGTAGGCGGCGACGATAGTCAG  
AAGTGAAAGCCCCGGGCTCAACCTGGGAATTGCTTTTGATACTGTGTTGCTTGAGTTCGG  
GAGAGGTGAGTGGAATTTCCAGTGTAGAGGTGAAATTCGTAGATATTGGGAAGAACACCG  
GTGGCGAAGGCGGCGACCTGGTCCGATACTGACGCTGAGGCGCGAAAGCGTGGGGAGCAA  
ACAGGATTAGAGACCCTCGTAGTCC

>Otu11970

CCAGCCTACGGGGGGCAGCAGTGGGGAATATTGGACAATGGGCGCAAGCCTGATCCAGCA  
ATGCCGCGTGAGTGATGAAGGCCTTAGGGTTGTAAAGCTCTTTCGCACGCGACGATGATG  
ACGGTAGCGTGAGAAGAAGCCCCGGCTAACTTCGTGCCAGCAGCCGCGGTAATACGAAGG  
GGGCTAGCGTTGCTCGGAATGACTGGGCGTAAAGGGCGCGTAGGCGGTTTGAACAGTTGG  
GCGTGAAATTCCAGGGCTTAACCTTGGGACTGCGTTCAATACGTTTAGACTTGAGTTCGG  
AAGAGGGTTCGTGGAATTTCCAGTGTAGAGGTGAAATTCGTAGATATTGGGAAGAACACCG  
GTGGCGAAGGCGGCGACCTGGTCCGAAACTGACGCTGAGGCGCGAAAGCGTGGGGAGCAA  
GCAGGATTAGATACCCGCGTAGTCC

>Otu11978

CCAGCCTACGGGTGGCTGCAGTGGGGAATTTTGGACAATGGGCGCAAGCCTGATCCAGCA  
ATGCCGCGTGAGTGAAGAAGGCCTTCGGGTGTAAAGCTCTTTTGTGAGGGAAGAAACGG  
GTCTTTCTAATACAGAGGCCTAATGACGGTACCGGAAGAATAAGCACCGGCTAACTACGT  
GCCAGCAGCCGCGGTAATACGTAGGGTGCAAGCGTTAATCGGAATTACTGGGCGTAAAGC  
GTGCGCAGGCGGTCCGCTAAGACAGATGTGAAATCCCCGGGCTTAACCTGGGAATGCAT  
TTGTGACTGGCGGGCTAGAGTATGGCAGAGGGGGGTAGAATTCACGTGTAGCAGTGAAA  
TGCGTAGAGATGTGGAGGAATACCGATGGCGAAGGCAGCCCCCTGGGCCAATACTGACGC  
TCATGCACGAAAGCGTGGGGAGCAAACAGGATTAGAAACCCCAGTAGTCC

>Otu11982

CCAGCCTATGGGGGGCAGCGGTGGGGAATATTGGACAATGAGCGAAAGCTTGATCCAGCA  
ATACCAAGTTATTGAAGAAGGCCAAACCGGCTGTAAATTTATTTTCGTTGAGGAAGATAAT  
GACATGAATCAAAGAAAGAAGTCCCGGCCAATGCCGTGCCAGCAGCCGCGGAAATACGGT  
AGGGGCAAGCGTTATTACATTGTATGGGCGTAAAGGGTGCGTAGGTAGTAATTTGAACT  
TTTTTGTAAAGAACAAAAGTGTACTTTTGTAAAGCAAAAAATAATCTTATTTCTAGAGTT  
GGAAAGAGGTTGACGGAATTCCTAGTGGAGAGGTAGAATTCAACAATATTAGGAGGAACA  
TCAAAGGCGAAGGCAGTTTTCTGGGTCCAGACTGACGCTGAGGCACGAAGGCATAGGGAT  
CAAATGGGATTAGAAACCCGTGTAGTCC

>Otu11986

CCAGCCTATGGGTCGCAGCAGTTGGGAATCTTGGACAATGGGGGAAACCCTGATCCAGCC  
ATGCCGCGTGAGTGATGAAGGCCTTCGGGTGTAAACTCTTTCGACGGGGACGATAATG  
ACGGTACCCGTAGAAGAAGCTCCGGCTAACTTCGTGCCAGCAGCCGCGGTAATACGAAGG  
GGGCTAGCGTTGTTTCGGAATTACTGGGCGTAAAGCGCGCGCAGGCGGCTATCCAAGTCAG  
TGGTGAAAGCCCCGAGCTCAACTCCGGAAGTCCACTGAAACTGTTTAGCTTGAGGACGA  
GAGAGGTGAGTGGAATTCCTAGTGTAGAGGTGAAATTCGTAGATATTGGGAGGAACACCC  
GTGGCGAAGGCGGCCAACTGGACCGACATGGACGCTGAGGCGCGAAAGCGTGGGGATCAA  
ACAGGATTAGAAACCCGGGTAGTCC

>Otu12000

CCAGCCTATGGGTGGCTGCAGTGGGGAATATTGGACAATGGGCGCAAGCCTGAACCAGCT  
ATGCCGCGTGTTGTGAAGAAGGCCTTCGGGTGTAAAGCACTTTTGTCCGGAAGAAATCC  
TCTTCGATAATACCGAGGGGGGATGACGGTACCTGAAGAATAAGCACCGGCTAACTACGT  
GCCAGCAGCCGCGGTAATACGTAGGGTGCAAGCGTTAATCGGAATTACTGGGCGTAAAGC  
GTGCGCAGGCGGTTATGTAAGACAGATGTGAAATGCCCCGGGCTTAACCTGGGAACTGCAT  
TTGTGACTGCATGGCTAGAATCTGGCAGAGGGGGGTAGAATTCACGTGTAGCAGTGAAA  
TGCGTAGATATGTGGAGGAATACCGATGGCGAAGGCAGCCCCCTGGGCTAAGATTGACGC  
TCATGCACGAAAGCGTGGGGAGCAAACAGGATTAGATACCCGCGTAGTCC

>Otu12011

CAGCCTATGGGTGGCAGCAGCCGAGAATTTTTTCAACAATGGGGGAAACCCTGATGGAGCGA  
CGCCGCGTGGAGGATGAAGGTTTTTCGGATTGTAAACTCCTGTCACTGCAGAACAAAGGGTG  
TGCCAGTTAACAGCCGCGCATTTTGATGGTATGCGGAGAGGAAGGGACGGCTAACTCCGT  
GCCAGCAGCCGCGGTAAGACAGAGGTCCCAAGCGTTGTTTCGGATTCAATTGGGCGTAAAGG  
GTGTGTAGGAGGTAGGGTAAGTCAGGTGTGAAATCCCAGAGCTTAACCTCTGAAACTACGC  
TTGATACTGCTCTGCTAGAGGATCGGAGGGGGTATCGGAATTTATGGTGTAGCAGTGAAA  
TGCGTAGATATCATAAGGAACACCGGTGGCGAAGGCGGATACCTGGAAGATTCTTGACTC  
TGAAACACGAAAGCCAGGGGAGCAAACGGGATTAGATACCCCCGTAGTCC

>Otu12012

CCAGCCTACGGGGGGCAGCAGTGGGGAATATTGGGCAATGTGCGACAGCGTGACCTGATA  
ATAATTCAGAGTGAGAAAATGGCAGCAACAACGCTGTAAACCTCTTTTGTAAAAA  
TAATGACTGTATTTAAAGAATTAACACTGGCTAATTCTGTGCCAGCAGCCGCGGTAACAC  
AGGGAGTGTAGACGTTATTCATCATTACTGGGTGTAAAGATACGTAGGCTGTCTTGGATT  
GGATATTTTGTAAAAAGCTTGGAGTATTCTCGAAGAATGACAAAAGTTACCCAAAGACTA  
AAGAGTTTAAATCAAGTTAAGAGAATTTCTTGTGTAAGGGTAGAATCTATATATATTGGG  
AGGACTACCAAAACAGTTGCGAAAGCACTTTTCAAGATAGAAGTACGCTAAGGTATGAA  
AGAATAGGTATCAAACAGGATTAGATACCCTAGTAGTCC

>Otu12017

CCTATGGGGGGCAGCAGTAAGGAATATTGGTCAATGGGCGCAAGCCTGAACCAGCCATGC  
CGCGTGACAGGAAGACGGCCCTACGGGTGTAAACTGCTTTTGTACTGGAATAAACCTTGG  
TATGTATACTAAGCTGAATGTACAGTAAGAATAAGGATCGGCTAACTCCGTGCCAGCAGC  
CGCGGTAATACGGAGGATCCGAGCGTTATCCGGATTTATTGGGTTTAAAGGGTGCGTAGG  
CGGCCTTGTAAGTCAGGGGTGAAAGACGGTAGCTCAACTATCGCAGTGCCCTTGATACTG  
CAGGGCTTGAATGTACTTGAGGTAGGCGGAATGTGACAAGTAGCGGTGAAATGCATAGAT  
ATGTCACAGAACACCAATTGCGAAGGCAGCTTACTAAAGTATGATTGACGCTGAGGCACG  
AAAGCGTGGGGATCAAACAGGATTAGATACCCTCGTAGTCC

>Otu12034

CCAGCCTATGGGGGGCAGCAGTGGGGAATATTGGACAATGGGGGAAACCCTGATCCAGCA  
ATGCCGCGTGAGTGATGAAGGCCTTCGGGTGTAAAGCTCTTTCGCCTGTGAAGATAATG  
ACGGTAACAGGATAAGAAGTCCCGGCTAACTCCGTGCCAGCAGCCGCGGTAAGACGGAGG  
GGACTAGCGTTGTTTCGGAATGACTGGGCGTAAAGGGTGCGTAGGCGGTCCCTTAAGTAAG

GCGTGAAAGCCCTGAGCTCAACTCGGGAATTGCGCTTTAACTGAGGGGCTTGAGGGTGA  
AAGAGGAAAGTGGAATTCCTAGTGTAGGGGTGAAATCCGTAGATATTAGGAAGAACACCA  
GAGGCGAAGGCGACTTTCTGGTTCATCACTGACGCTGAGGCACGATAGCGTGGGGAGCGA  
AAAGGATTAGATACCCCAGTAGTCC

>Otu12039

CCAGCCTACGGGGGGCTGCAGTGGGGAATTTTGCGCAATGGGGGAAACCCTGACGCAGCA  
ACGCCGCGTGAGGATGAAGCCCCCTTGGGGTGTAAGCTCCTTTTCGACCGGGAAAATAATG  
ATGGTACCGGTGGAAGAAGCACCGGCTAACTCTGTGCCAGCAGCCGCGGTAATACAGAGG  
GTGCGAGCGTTGTTTCGGAATTATTGGGCGTAAAGGGCGCGTAGGCGGTATGGTAAGTCAC  
CTGTGAAACCTCTAAGCTTAACTTAGAGCCTGCAGGCGAAACTGCCATGCTGGAGGGTGG  
GAGAGGTGCGTGGAATTCCTGGTGTAGCGGTGAAATGCGTAGATATCAGGAGGAACACCG  
GTGGTGTAAACGGCTTTCTGGACCATAACTGACGCTGAGACACGAAAGCGTGGGTAGCAA  
ACAGGATTAGAAACCCCAGTAGTCC

>Otu12041

CCAGCCTATGGGTGGCACCAGTGGGGAATATTGGACAATGGGCGCAAGCCTGATCCAGCA  
ATGCCGCGTGAGTGATGAAGGCCTTAGGGTTGTAAAGCTCTTTTCGCACGCGACGATGATG  
ACGGTAGCGTGAGAAGAAGCCCCGGCTAACTTCGTGCCAGCAGCCGCGGTAATACGAAGG  
GGGCTAGCGTTGTTTCGGAATTACTGGGCGTAAAGGGCGCGTAGGCGGCGCCGAAGTCAG  
ATGTGAAAGCCCCGGGCTCAACCTGGGAATTGCATTTGATACTCTGGTGCTTGAGTTCGG  
GAGAGGTGAGTGGAATTCCTAGTGTAGAGGTGAAATTCGTAGATATTGGGAAGAACACCG  
GTGGCGAAGGCGGCTCACTGGCTTGTAAGTACGCTCAGGCGCGACAGCGTGGGGAGCAA  
ACAGGATTAGATACCCTGTAGTCC

>Otu12042

CCAGCCTATGGGTGGCAGCAGTAGGGAATATTGCTCAATGGGGGAAACCCTGAAGCAGCA  
ACGCCGCGTGAGTGATGAAGGCCTTCGGGTCGTAAAGCTCTGTTGTACGGGAAGAATGCC  
CAAGTAGCTAACATCTACTTGGGGTGACGGTACCGTATAAGAAAGGACCGGCTAACTTCG  
TGCGAGCAGCCGCGGTAAGACGGGGGGTCCAAGCGTTGTTTCGGAATCATTTGGGCGTAAAG  
CGTGTGCAGGTGGTTTTTGAAGTTAGATGTGAAAGCCTCGGGCTCAACCCGAGAAGTGCA  
TTTAAAACTCCAAAACCTTGAGTAAGGAAGAGGGTTCGTGGAATTCCAGGTGTAGTGGTGAA  
ATACGTAGATATCTGGAGGAACACCGGTGGCGAAGGCGGCGACCTGGTTCCTATACTGACA  
CTCATACACGAAAGCGTGGGGATCAAACAGGATTAGAGACCCGTGTAGTCC

>Otu12044

CCAGCCTACGGGGGACACCAGTGGGGAATTTTGCGCAATGGGGGAAACCCTGACGCAGCAA  
CGCCGCGTGAGGATGAAATATCTTGGTATGTAAACTCCTTTTCGATGGGGAAGATAATGA  
CGGTACCCATAGAAGAAGCCCCGGCTAACTTCGTGCCAGCAGCCGCGGTAATACGAAGGG  
GGCTAGCGTTGCTCGGAATCACTGGGCGTAAAGCGCACGTAGGCGGGTCTTAAAGTCAGA  
GGTGAATCCTGGAGCTCAACTCCAGAACTGCCTTTGATACTGAGGATCTCGAGTTCGGG  
AGAGGTGAGTGGAAGTGCAGTGTAGAGGTGAAATTCGTAGATATTCGCAAGAACACCAG  
TGCGCAAGGCGGCTCACTGGCCCGATACTGACGCTGAGGTGCGAAAGCGTGGGGAGCAAA  
CAGGATTAGATACCCTCGTAGTCC

>Otu12051

CCAGCCTACGGGGTGCTGCAGTGGGGAATATTGGACAATGGGGGAAACCCTGATCCAGCC  
ATGCCGCGTGAACGATGAAGGCCTTCGGGTGTAAAGTTCTTTTGGTGGGGACGATGATG  
ACGGTACCCACAGAAAAGCACCGGCTAACTCTGTGCCAGCAGCCGCGGTAATACAGAGG  
GTGCGAGCGTTAATCGGAATTACTGGGCGTAAAGCGCGCGTAGACGGTTTGGTAAGTCAG  
ATGTGAAATCCCTGGGCTCAACCTGGGAAGTGCATTTGATACTGCCTGGCTAGAGTATCG  
AAGAGGGAAGTGGAATTTCCGGTGTAGCGGTGAAATGCGTAGATATCGGAAGGAACACCA  
GTGGCGAAAGCGACTTCCTGGTTCGAATACTGACGTTTCATGTGCGAAAGCGTGGGGAGCAA  
ACAGGATTAGAAACCCCTCGTAGTCC

>Otu12053

CCAGCCTACGGGGGGCAGCAGTCGAGGATCTTTCTCAATGGGCGAAAGCCTGAAGGAGCG  
ACGCCGCGTGGGGGATGAAGGTCTTCGGATTGTAAACCCCTGTCATCTGGGAACAATGCT  
CCGCACCCAACACGTGCGGAGTTGATAGTACCGGAAGAGGAAGCCGTGGCTAACTCTGTG  
CCAGCAGCCGCGGTAATACAGAGACGGCAAGCGTTGCTCGGATTTCATTAGGCGTAAAGGG  
TCCGCAGGCGGTTCGGCTAAGTCGGATGTGAAATCCCGAGGCTTAACCTCGGAAAGTCATT  
CGAAACTAGTCGACTAGAGGACTGGAGAGGAGACCGGAATTGTGGTGTAGCGGTGAAAT  
GCGTAGATATCGACAAGAACACCAGTGGCGAAGGCGGGTCTCTGGCCAATTCTTGACGCT  
CAGGGACGAAAGCGTGGGGAGCAAACGGGATTAGATACCCTTGTAGTCC

>Otu12059

CCAGCCTATGGGATGCTGCAGTCGCGAATCATTGGCTAATGCACGCAAGTGTGACCATGC  
GACGCCGCGTGGGGGAGGAAGGTCTTCGGATCGTAAACCCCTGTCACCGGGGAATAATGA  
CCGGCCCTGAATAGGGGCCGGGCGAGAACCAACCCGGAGAGGAAGTAGTGGCTAACTCCG  
TGCCAGCAGCCGCGGTAATACGGAGACTACGAGCGTTACTCGGATTCACTGGGCGTAAAG  
GGTGCCTAGGCGGTGAGGTGTGTGAGGTGTGAAATCCCGGGGCTTAACCCCGGAACGGCG  
CTTGAAACTACCTGGCTAGAGGCTTGGAGAGGGCAGTGGAATTCTCAGTGTAGCGGTGAA  
ATGCGTAGATATTGAGAGGAACACCAACGGCGAAGGCAGCTGCCTGGACAAGATCTGACG  
CTGAAGCACGAAAGCGTGGGTAGCAAAAGGGATTAGAAACCCCTGTAGTCC

>Otu12066

CCAGCCTACGGGGCGCTGCAGGAACGAATATTGGGCAATGGGCGAAAGCCTGACCGAGCG  
ACGCCGCGTGCGGGATGAAGGCCTTCGGGTGTAAACCGCTGTCAGTGGGGAGGAAATCT  
GGGAGGGATCACCTCTCAGTTGACCTATCCGCAGAGGAAGGACGGGCTAAGTTTCGTGCC  
AGCAGCCGCGGTAATACGAACCGTCCTAACGTCATTTCGGAATCACTGGGCTTAAAGGGTG  
CGTAGGCGGTCCGGTAAGTTGGGTGTGAAATCCCTCGGCTTATCCGAGGAATTGCGCTCA  
AAACTGTCGGACTTGAGGGAGACAGAGGTGAGTGGAACCTTAGGGTGGAGCGGTGAAATGC  
GTTGATATCCTAAGGAACACCGGTGGCGAAAGCGACTCACTGGGTCTCTTCTGACGCTGA  
GGCACGAAAGCTAGGGTAGCGAACGGGATTAGAAACCCGCGTAGTCC

>Otu12070

CCAGCCTATGGGAGGCTCCAGTGGGGAATATTGGACAATGGGCGCAAGCCTGATCCAGCC  
ATGCCGCGTGAGTGATGACGGCCCTAGGGTTGTAAAGCTCTTTCACCCACGACGATAATG  
ACGGTAGTGGGAGAAGAAGCCCCGGCTAACTTCGTGCCAGCAGCCGCGGTAATACGAAGG  
GGGCTAGCGTTGTTTCGGATTTACTGGGCGTAAAGCACACGTAGGCGGATCTTTAAGTCAG  
GGGTGAGATGCCGAGGCTCAACTTCGGAACGCTTTTGATACTGGAGATCTTGAGTTCGG  
GAGAGGTGAGTGGAACGTCGAGTGTAGAGGTGAAATTCGTAGATATCTGCAGGAACACCC  
GTGGCGAAAGCGGCGAGCTGGATCACTACTGACGCTGAGGAACGAAAGCTAGGGGAGCAA  
GCAGGATTAGAAACCCCTGTAGTCC

>Otu12077

CCAGCCTACGGGTGGCACCAGCAACGAATATTCCGCAATGGGCGCAAGCCTGACGGAGCG  
ACGCCGCGTGGGGGATGAAGTCCTTCGGGATGTAAACTCTAATAGTATGTTAGGAAGCAA  
GTCGACCTAACACGTCGGCAAGTTGACCGACATACGAAAGGGGCGGCTAACTCCGTGCCA  
GCAGCCGCGGTAAGACGGAGGCCCGAGCGTTGTTTCGGAATCACTGGGCTTAAAGCGCGT  
GTAGGCGGGACGGTAAGTACCTTGTGAAATCCCCGGCTTCAACCCGGGAACGCTCGGTA  
TACTGCCGTTCTTGAGGCAGGTAGGGGTCGCTGGAACCTTAGGTGGAGCGGTGAAATGCG  
TAGATATCTAAGGGAACGCCTGTGGCGAAAGCGGGCGACTGGGCCTGTCCTGACGCTGAG  
ACGCGAAAGCGTAGGGAGCAAACGGGATTAGATACCCCGGTAGTCC

>Otu12080

CCAGCCTATGGGTGGCTGCAGTTAGGAATTTTGCGCAATGGACGAAAGTCTGACGCAGCG  
ACACCGCGTGAGGGATGAAGGTCTTCGGATCGTAAACCTCTTTTATTGGAGCATGAAGCT  
CTTTTGAATAAGGAACTACTAACTACGTGCCAGCAGTCGCGGTAATACGTAGGTTCCGAG  
CGTTACCCGGTTTTATTGGGCGTAAAGAGTCTGTAGGTGGCTTTCTCAGTCTTGTTTTCAA  
AGACTCCGACTCAATCGGAGGCAGGGGAGGATACTAGGAGGCTCGAGTTATATCGGGGT  
TACTGGAATTTGCAGTGTAGGGGTAAATCCGTGGATACTGCAAAGAACACCAAGCGCGA  
AGGCGGGTAAGTACTAGGTATTTACTGACACTCAGAGACGAAAGCTAGGGTAGCCAATCAGAT  
TAGAGACCCAGTAGTCC

>Otu12084

CCAGCCTACGGGGGGCTGCAGTCAAGAATATTCCTCAATGACCGAAAGGCTGAAGGAGCG  
ACGCCGCGTGATGAAGAAGCCCTCCGGGCGTAAAGTACTTTTAACTGGGACGAAACTA  
TGACGGTACCAGTTGAATAAGGGGCTGCTAACCTCGTGCCAGCAGCAGCGGTAATACGAG  
GGCCCCAAGCATTATCCGGATTCATTGGGCGTAAAGCGTCCGCAGACGGTTTGTGCGATC  
TCCTGTAAATCACAAGGCTCAACCTTGTGGCCGCGGGAGAGATGGATAAGCTAGAGACT  
GGAAGAGGCAAGCGGAATTGCTGGTGTAGGGGTAAATCCGTTAATATCAGCAGGAACAC  
TTAATGCGAAGGCAGCTTGCTAGGACAGTTCTGACGTTTCAGGGACGAAAGCGTGGGGAGC  
GAATGGGATTAGATACCCCTGTAGTCC

>Otu12088

CCAGCCTATGGGAGGCAGCAGTGGGGAATATTGCACAATGGGGGAAACCCCTGATGCAGCA  
ACACCGCGTGAGCGACGAAGGCCTTCGGATCGTAAACCCCTGTCGTGGGGACGAAGGTT  
TGGGGTTGAACAGGCCCTGAGCTTGACGGTACCCGGAGAGGAAGCCCCGGCTAACTCTGT



GCCAGCAGCCGCGGTAATACAGAGGGGGCAAGCGTTATTCGGAATTATTGGGCGTAAAGG  
GCGCGTAGGCGGTGTTTTAAGTGAGATGTGCAATCCCCGGGTTTAACCTGGGAAGTGC  
CTCAGACTGGAACGCTAGAGTACTGGAGAGGGTGGTAGAATTCACAGTGTAGCGGTGAAA  
TGCGTAGAGATGTGGAGGAATACCAGTGGCGAAGGCGGCCACCTGGACAGTAACTGACGC  
TGAGGCGCGAAAAGTGTGGGTAGCAAACAGGATTAGATAACCCGTGTAGTCC

>Otu12094

CCAGCCTACGGGGGGCTGCAGTCGAGAATTTTTTCAACAATAGGCGAAAGCCTGATGGAGCG  
ACGCCGCGTGGGGGATGAAGGGCTTCGGCTTGTAACCCCTGTCATTTCGTGAACAAAGCT  
GTCGGGTGAATAGCTTGGCAGTTGATAGTAGCGGAAGAGGAAGGGACGGCTAACTCTGTG  
CCAGCAGCCGCGGTAATACAGAGGTCCCAGCGTTGTTTCGGATTTACTGGGCGTAAAGGG  
TGCGTAGGCGGTGAGGTAAGTCTGGTGTGAAATCTCCGGGCCTAACCCGGAATGCATT  
GGAAACTATCTGACTAGAGACTTGGAGGGGAGATCGGAATTCTCGGTGTAGCAGTGAAAT  
GCGTAGATATCGAGAGGAACATCAGTGGCGAAGGCGGATCTCTGGACAAGTACTGACGCT  
GAGGCACGAAAGCCAGGGGAGCAAACGGGATTAGAAACCCGCGTAGTCC

>Otu12095

CCAGCCTATGGGAGGCTGCAGTCGAGAATTTCTTCAACAATGGGCGAAAGCCTGATGGAGCG  
ACGCCGCGTGGGGGATGAATGGCTTCGGCCCGTAACCCCTGTCATTTCGCGATCAATGCG  
TCCGGCCTAACACGCTGGACGTTGATAGTAGCGGAAGAGGAAGGGACGGCTAACTCTGTG  
CCAGCAGCCGCGGTAATACAGAGGTCCCAAGCGTTGTTTCGGATTCACTGGGCGTAAAGGG  
TGCGTAGGCGGCCGGGTCTGATGTGAAATCTCGGAACCTAACTCCGAAACTGCATT  
GGATACTATTCGGCTAGAGGGTTGGAGGGGGGACTGGAATTCTCGGTGTAGCAGTGAAAT  
GCGTAGATATCGAGAGGAACACCAGTGGCGAAGGCGAGTCCCTGGACAACCTCTGACGCT  
GAGGCACGAAAGCGTGGGGAGCAAACAGGATTAGAGACCCCTGTAGTCC

>Otu12103

CCAGCCTATGGGGCGCTCCAGTGGGGAACCTTGCGCAATGGGCGAAAGCCTGACGCAGCG  
ACGCCGCGTGAGTGATGAAGGCCTTCGGGTGTAAAGCTCTGTGGGGAGAGAAGAATTAG  
TGCGGGCTAATACTCCGCATGATGACGGTATCTCCTTAGCAAGCACCGGCTAACTCTGTG  
CCAGCAGCCGCGGTAAGACAGAGGGTGCAAACGTTGTTTCGGAATTACTGGGCGTAAAGCG  
TGTGTAGGCGGCCATGTAAGTTGGATGTGAAAGCCCCGGGCTCAACCCGGGAAGTGCATT  
CAAACTGCGTGGCTTGAGTACTGGAGAGGTTGGTAGAATTCTCGGTGTAGAGGTGAAAT  
TCGTAGATATCGAGAGGAATACCGGTGGCGAAGGCGGCCAACTGGACAGATACTGACGCT  
GAGACACGAAAGCGTGGGGAGCAAACAGGATTAGATAACCTAGTAGTCC

>Otu12104

CCAGCCTACGGGGTGCTCCAGCTAAGGAACTTCTTCAATGCGCGTAAGCGTGAAAGAGTA  
AGCCGGAGTGTTGTTTCATAATTTTGAACAACTTTTATTTGTTGCAAAAAGACAGATGAAT  
AAGGACTGGGCAAGATCGGTGCCAGCCGCCGCGGTAATCCCGACGGTCCAAGTCGCAGCC  
ACAATTATTGGGTCTAAACATTCGTAGCTTGTTTATTAAGTTCTTTGTGAAATCTCAAA  
TCTTAAATTTGAGGCGTGCAAAGAATACTGGTAACTGGAGACCGGAAGAAGCAAGGAGT  
ATGTTTAAAGGTAGCGGTAAATGTGTTAGTCTTAAGCAGACTAACAAGAGCGAAGGCACC  
TTGCTAGTACGGATCTGACAGTGAGGAATGAAGGCTAGGGGCGCGAAACGGATTAGAAAC  
CCTCGTAGTCC

>Otu12107

CCAGCCTACGGGGGGCAGCAGTGGGGAATATTGCACAATGGGCGCAAGCCTGATGCAGCG  
ACGCCGCGTGGAGGATGAAGGTTTTTCGGATTGTAACTCCTGTTAAGTGGGAAAAAGAC  
TGATATTTAAAGATGTCGGGGATGATGGTACCCTAGAGAAAGCGCCGGCAAACCTTCGT  
GCCAGCAGCCGCGGTAATACGAAGGGTGCAAGCGTTATTCGGAATCACTGGGCGTAAAGA  
GTGCGGAGACGGCATTGTAAGTCAACTGTAAAGAGCCCGGCTTAACCGGGCAAAGGCGG  
GTGATACTGCAAAGCTAGAGTGCAGGAGAGAAAGGTAGAATTCTCGGAGTAGCGGTAAAA  
TGCGTAGATCTCGAGAGGAATACCGGTTGCGAAGGCGGCCTTTTGGCCTGCAACAGACGT  
TTAAGCACGAAAGCGTGGGGAGCAAACAGGATTAGAAACCCAGTAGTCC

>Otu12108

CCAGCCTATGGGTGGCTCCAGTCGAGAATATTTTCGCAATGGGCGAAAGCCTGACGAAGCG  
ACGCCGTGTGGATGAAGAAGGCCTTCGGGTGTAAATCCTGTCACTTGGGAGCAAATAG  
TTGGTGTGAATAACACTAGTTAGTGAGAGTACCAAGGGAGGAAGCACTGGCTAACTCCGT  
GCCAGCAGCTGCGGTAATACGGAGGGTGCAAGCGTTAGTCGGAATAACTGGGCGTAAAGG  
GTGCGTAGGCGGGCATATAAGTTAGGTGTGAAATTACCGGGCTCAACTTGGTAACGGCAC  
TTAATACTGTATGTCTAGAGGAATGGTGGGGAAAACGGAATTCCATGTGTAGCGGTGAAA  
TGCGTAGATATATGGAAGAACACCTGTGGCGAAAGCGGTTTTCTAACCTACTCCAGACGC

TGAGGCACGAAAAGCAAGGGGATCAAACAGGATTAGAAAACCCCGTAGTCC

>Otu12113

CCAGCCTACGGGACGCTCCAGTCGAGAATCTTCCCAATGGCCGAAAGGCTGAGGGAGCG  
ACGCCGCGTGACAGGAAGAAGCCCTTCGGGGTGTAAGCTGCTTTTCTTCAAGAACAACCTCT  
GAGTGTATTGAAGGAATAAGGGGCTGCTAACTTCGTGCCAGCAGCAGCGGTAATACGAAG  
GCCCCGAGCGTTATCCGGATTATTGGGCGTAAAGCGTTCAACGGTGGCGTAGTGTGTTT  
TTGGTTAAATCTCACGGCTCAACCGTGGGGCTGCCGGGAAAACCTGCTATGCTTGAGGGCG  
GAAGAGGTGTGCGGAACCTACCGGTGTAGCGGTAAAATGCGTTCATATCGGTAGGAACACC  
GAAGGCGAAAGCAGCACACTAGGACGACCCCTGACACTCAACGAACGAAAGCGTGGGTAGC  
GAATGGGATTAGAAAACCCATGTAGTCC

>Otu12118

CCAGCCTATGGGTGGCTCCAGGCGCGAAAACCTTTACAATGCGCGAAAGCGTGATAAGGGG  
ATCCTGAGTGCTCATACACAGTATGGGCTTTTTTCAAGAGTAAAAATCTTGAAGAATAAG  
TGGTGGGCAAGACTGGTGCCAGCCGCCGCGGTAACACCAGCGCCACGAGTGGCATTTCGTG  
TATTTGGCCTAAAGCGTCCGTAGCTGGTTCTGTAAATCTTTCGTGAAATTGTTATTGTCA  
ACGTAACAGCGTGCGAAAGACACTGCAGGACTTGAGACCGGGAGGAGTCAGAGGTATTCT  
TGGGGGAGCGGTAAAATGTTATAATCCCAAGAAGACCACCAAGTGGCGAAGGCGTCTGACT  
AGAACGGATCTGACAGTGAGGGACGAAAGCTAGGGGAGCGATCCGGATTAGAAAACCCGAG  
TAGTCC

>Otu12123

CCAGTCTATGGGGGGCTGCAGTCGAGGATCTTTAGCAATGGGCGAAAGCCTGACTATGCG  
ACGCCGCGTGAGACGATGAAGGCCTTCGGGTGCTAAAGTCCTGTCAGACGGGATGAATATT  
TTTAACCTAATACGTTGAAAAGGTGACAGTACCGTCAGAGGAAGCCACGGCTAACTCCGT  
GCCAGCAGCCGCGGTAATACGGAGGTGGCGAGCGTTACTCGGATTTACTGGGTGTAAAGG  
GTATGTAGGCGGGCTTGTAAGTCATGCGTGAAAGCCCTTGGCTCAACCAAGGAAATGCGC  
GTGAAACTGCTTGTCTTGAGTGCGGGAGAGGGGAACGGAATTCCTGGTGTAAAGGTGAAA  
TCTGTAGAGATCGGGAGGAACACCAAGTGGCGAAAGCGGTTCCTGGTCCGTAACCTGACGC  
TGAAATACGAAAAGCTTGGGGAGCAAACAGGATTAGATAACCCGAGTAGTCC

>Otu12131

CCAGCCTACGGGGGGCTGCAGTGGGGAATTTTTCGCAATGGGCGAAAGCCTGACGCAGCA  
ACGCCGCGTGAGGATGAAGGCCTTCGGGTGCTAAACTCCTGTCAGTGGGGACGAATGCT  
TCGCAAGAAGTTTGACTGTACCCGTTGAGGAAGCCACGGCTAACTCCGTGCCAGCAGCCG  
CGGTAATACGGAGGTGGCAAGCGTTGTTTCGGAATTACTGGGCGTAAAGGGCGCGTAGGCG  
GCTTTGTAAGTCAGATGTGAAAGCCCCGGGCTTAACCCGGGAATTGCATCTGAAACTGCT  
TTGCTTGAGTTCTGGAGGGGGTAGTGGAATTCCTAGTGTAGCGGTGAAATGCGTAGATAT  
TGGGAGGAACACCGGTGGCGAAGGCGACTTCTGGCCCTATACTGACGCTGAGACGCGAG  
AGCGTGGGGAGCAAACAGGATTAGATAACCTCGTAGTCC

>Otu12138

CCAGCCTATGGGACGCTGCAGCAGGGAATTTTTCGCAATGGGCGAAAGCCTGACGCAGCA  
ACGCCGCGTGAGGGATGAAGGCCTTCGGGTGCTAAACCTCTTTTTTTCAGGGAAGAATAAT  
GACGGTACCTGAAGAATAAGTCACGGCTAACTACGTGCCAGCAGCCGCGGTAATACGTAG  
GTGGCAAGCGTTATCCGGATTCACTGGGCGTAAAGAGCGCGTAGGTGGTTCTTCAAGTCA  
GATGTTAAATCTCCCGGCTTAACCTGGGAGCCATCATCTGATACTGATGGACTTGAGGGTG  
GTAGAGGGAGGTGGAATTCCTGGTGTAGTGGTGAATGCATAGATATCGGGAGGAACACC  
AGTGGCGAAAGCGGCCTCCTAGGCCATTCTGACACTGAGGCGCGAAAGCGTGGGGAGCG  
AACAGGATTAGAGACCCGGGTAGTCC

>Otu12142

CCAGCCTATGGGTGGCAGCAGTGGGGAATCTTTCGCAATGGGCGAAAGCCCGACGCAGCC  
ATGCCGCGTGAAATGATGAAGGTCTTAGGATTGTAAATCTTTTACCCGGGGACGATAATG  
ACGGTACCCGGAGAAGAAGCCCCGGCTAACTTCGTGCCAGCAGCCGCGGTAATACGAAGG  
GGGCTAGCGTTGCTCGGAATTACTGGGCGTAAAGGGAGCGTAGGCGGACTGTTAAGTTAG  
AGGTGAAAGCCCAGGGCTCAACCTTGGAATTGCCTTTGATACTGGCAGTCTTGAGTACGG  
AAGAGGTATGTGGAACCTCCGAGTGTAGAGGTGAAATTCGTAGATATTCGGAAGAACACCA  
GTGGCGAAGGCGACATACTGGTCCGTTACTGACGCTGAGGCTCGAAAGCGTGGGGAGCAA  
ACAGGATTAGAAAACCCCGGTAGTCC

>Otu12146

CCAGCCTATGGGGGGCAGCAGTCGCGAATCTTTTGCAATACACGAAAGTGTGACAAAGCG  
AGCCAAAGTGATTCCTCGCACAGGGAATCTTTTGCCAGCTGTAAAAGGCTGGCGAATAAG

GACTGGGCAAGACTGGTGCCAGCCGCCGCGGTAATCCCAGCAGTCCAAGTTGCAGCCAGC  
ATTATTGGGTCTAAAACATCCGTAGCTTGTTTAACAAGTTCTTTGTGAAATCTGGCATCT  
TAAGTGTGCGGGCGTGCAAAGAATACTGTTAGGCTAGAGACCGGTAGATGTAAGGAGTACA  
CCTAAGGTAGTGGTAAAATACGTTAATCTTAGGTGGACTAACAATTGGCGAAGGCACCTT  
ACAAGGACGGATCTGACAGTGAGGGATGAAGGCTAGGGGCGCAAAACGGATTAGATACCC  
CTGTAGTCC

>Otu12148

CCAGCCTATGGGGGGCACCAGTAACGGATATTGGGCAATGGGCGAAAGCCTGACCCAGCG  
ACGCCGCGTGCAAGATGAAGGTCTTCGGATTGTAACTGCTGTCAGGGGCTACCAAGTGA  
CCGTGGCCAACATCCACGGAAGCTGAGGCGCCCCAGAGGAAGCCACGGCTAACTTCGTGC  
CAGCAGCCGCGGTAAAGACGAAGGTGGCAAGCGTTGTTTCGGAATCACTGGGCTTAAAGAGC  
ACGTAGGCGGGCCGTTAAGCACCTTGTGAAAGCCCCCGGCTCAACCGGGGAACTGCTTGG  
TGTACTGGCGGTCTTGAGGCAGGTAGGGGCGTGGAGAACTCTTGGTGGAGCGGTGAAATG  
CGTAGATATCAAGAGGAATGCCGGAGGTGAAGACGCCGCGCTGGGCCTGTCCTGACGCTG  
AGGTGCGAAAGCCAGGGGAGCAAACGGGATTAGATACCCCTGGTAGTCC

>Otu12153

CCAGCCTATGGGTGGCAGCAGTAAGGAATTTTCCACAATGCCCGAAAGGGTGATGGAGCG  
ACGCTGCGTGGGTGATGAAGGCCTTCGGGTGTAAACCCCTTTTGTAAAGGATGAACTTA  
CAGTACTTTACGAATAAGCTTCGGCCAACCTCTGTGCCAGCAGCCGCGGTAAAGACAGAGGA  
AGCAAGCATTATCCGGAATGATTGGGTGTAAAATGTGTGTAGGTCGTTATATAAGTCAAA  
TGTGAAATCCTGATGCTTAACATCAGAACGGCATTGATACTGTTTAACTTGAGTTCGAG  
CGAGGAGGGCGGAATTCCCGGTGGAGCGGTGAAATGCGTTGATATCGGGGGGAACACCAA  
TAGCGAAGGCAGCTTTCTAGCTCGAAACTGACACTGAAACACGAAAGCTAGGGGAGCAAA  
CAGGATTAGATACCCTAGTAGTCC

>Otu12155

CCAGCCTATGGGAGGCAGCAGTCGAGAATATTCCTCAATGGCCGAAAGGCTGAAGGAGCG  
ACGCCGCGTGATCGAAGAAGCCCTTCGGGGTGTAAGATCTTTTTTATGGAACGAACGAT  
GACGGTACCATAAGAATAAGGGGTACTAACTCTGTGCCAGCAGTAGCGGTAATACAGAG  
ACCCCAAACATTATCCGGATTTATTGGGCGTAAAGCGTCCGCAGGTGGCTTGGCAAGTTT  
CGTTTCAAATCTCAGCGCTCAACGTTGGGACCGGACGAAAACTGCTAAGCTTGAGGTTG  
GGAGAAGTCAGTGGAATGGCCGGTGTAGGGGTAAAATCCGTTAATATCGGCTAGAACACC  
AGTGGCGAAAGCGACTGACTAGAACACACCTGACACTCATGGACGAAAGCGTGGGTAGCG  
AACAGGATTAGAGACCCCGTAGTC

>Otu12157

CCAGCCTACGGGTTGCTGCAGTCGAGAATCTTTCCCAATGGACGAAAGTCTGAGGATGCG  
ACGCCGCGTGAGGGATGAAGGTCTTCGGATCGTAAACCTCTTTTGTGCGGGGAGGAACTC  
CGTCGGTGAACAACCGCCGGAACCTGACTGTACCTGGCGAATAAGCCACGGCTAACTCCGT  
GCCAGCAGCCGCGGTAATACGGAGGTGGCAAGCGTTACTCGGTATGACTAGGTGTAAAGG  
GTTTCGTAGGCGGCCTTGTAAGTGGAAGGTGAAATCTTTTAGCTCAACTAAAAAACTGCCT  
TTCAAACCTGCTAGGCTAGAGGCTGGAAGAGGAGAGCGGAACCTGCTAGTGTAAGGTGAAA  
TTTGTGGATATTAGCAGGAACGCCTGTGGAGAAGTCGGCTCTCTGGTCCCGTCCTGACGC  
TGAGGAACGAAAGCTAGGGGAGCAAACAGGATTAGATACCCCGTAGTCC

>Otu12158

CCAGCCTACGGGATGCTCCAGCAAGGAATTTTCGGCAATGGGCGCAAGCCTGACCGAGCA  
ACGCCGCGTGCGGGATGACGGCCTTCGGGTGTAAACCGCTTTTGCGGGGGACGATCATG  
ACGGTACCCCGCGAATAAGGCTCGGCTAACTCTGTGCCAGCAGCCGCGGTAAAGACAGAGG  
AGCCAAGCGTTGTCCGGATTAACGGGCGTAAAGCGCACGCAGGCGGTACGCGCGTGGG  
GTGTGAAAACGAGCCGCTTAACGGCTCGAGGCCACTTCATACGGCGCGACTGGAGCCTGG  
CAGAGGTCCGTGGAATTGCCGGTGTAGTGGTGAAATGCGTAGAGATCGGCAGGAACACCC  
AGGGGGAAACCAGCGGACTGGGCCAGTGCTGACGCTCAGGTGCGAAAGCGTGGGGAGCGA  
ACCGGATTAGATACCCTGGTAGTCC

>Otu12159

CCAGCCTACGGGATGCACCAGTGGGGAATATTCGCAATGGACGAAAGTCTGACGGAGCG  
ACGCCGCGTGATGACGAAGGCCGAAAGGTTGTAAAGTCCTTTTGTGTTGGGGAAGAATAAC  
CATGGGAGGGAATGCCCGTGGGATGACATGAACCGGCGAATAAGCCCCGGCTAACTACGT  
GCCAGCAGCCGCGGTAACACGTAGGGGGCGAGCGTTGTTTCGGAATTACTGGGCGTAAAGG  
GCATGTAGGCGGGCCCTATAAGCCTGGCGTGAAAGTCACCGGCTCAACCGGTGGATTGCGC  
TGGAACCTGCAGGGCTTGAATCATGGAGAGGGAGCTAGAATTCCTGGTGTAGGGGTGAAA

TCTGTAGAGATCAGGAAGAATACCAGTGGCGAAGGCGAGCTCCTGGCCAATGATTGACGC  
TGAGGTGCGAAAAGTGTGGGGATCAAACAGGATTAGAAAACCCTCGTAGTCC  
>Otu12165  
CCAGCCTATGGGGGGCAGCAGCAGGGAATCTTGCGCAATGGGCGAAAGCCTGACGCAGCA  
ACACCGCGTGGGGGATGAAGGCTCATGGGTGCTAAACCCCTTTTCTCAGGGAAGAAAAAA  
ATGACGGTACCTGAGGAATAAGCATCGGCCAACTACGTGCCAGCAGCCGCGGTAATACGT  
AGGATGCAAGCGTTATCCGGATTCACTGGGCGTAAAGAGCGCGTAGGCGGTCTTTAAGT  
TAGGTGTGAAAACCTCTCAGCTCAACTGAGAGACGCCATCTAATACTGGGGGGCTTGAGGG  
CAGCAGAGGAAGATGGAATTCGCGGTGTAGTGGTGAAATGCGTAGATATCGGGAGGAACA  
CCAGTGGCGAAGGTGGTCTTCTGGGCTGTACCTGACGCTGAGGCGCGAAAGCGTGGGTAG  
CAAACAGGATTAGATACCCTTGTAGTCC  
>Otu12166  
CCAGCCTATGGGATGCAGCAGGTGCGAAACCTCTGCAATGCGCGAAAGCGTGACAGGGGG  
ACTCTGAGCGCTACACCACGCGTGTAGCTTTTTGCAAGCCTAGACAGCTTGTAGAATAAG  
GGCTGGGTAAAGACCAGTGCCAGCCGCCGCGGTAATACTGGCGGCCCGAGTGGTGTCCACG  
AATATTGGGCCTAAAGAGTCCGTAGCTGGCCTGTTAAGTTTCCTGTGAAATCTCCGGGCT  
TAACTCGGAGGCGTGACAGGGAATACTGACGGGCTTGAGAGCGGGGGAGGCCAAGAGTACT  
TATGGGGTAGGGGTAAAATCCTGTAATCCTATAAGGACTACCAGTGGCGAAGGCGCTTGG  
CCAAAACGCGTCTGACAGTGAGGGACGAAGGCTAGGAGAACGAATCGGATTAGATACCCC  
CGTAGTCC  
>Otu12167  
CCAGCCTACGGGTTGCTGCAGTAAGGAATATTGGGCAATGGGCGGGAGCCTGACCCAGCC  
ATGCCGCGTGACAGGAAGACGGCCTTATGGGTTGTAACTGCTTTTGTACGGGAATAAATC  
TCTCTACGTGTAGAGAGTTGAAGGTACCGTAAGAATAAGCATCGGCTAACTCCGTGCCAG  
CAGCCGCGGTAATACGGAGGATGCAAGCGTTATCCGGATTCAATTGGGTTTAAAGGGTGCG  
CAGGCGGACTAATAAGTCAGCGGTGAAATTCACGGCTCAACTGTAGAACTGCCGTTGAT  
ACTGTTAGACTAGAGTATAATTGGAGTGGGCGGAATGTGTCATGTAGCGGTGAAATGCAT  
AGATATGACACAGAACACCGATCGCGAAGGCAGCTCACTAAGTTACAACCTGACGCTCATG  
CACGAAAGCGTGGGGATCAAACAGGATTAGAAAACCCTGGTAGTCC  
>Otu12175  
CCAGCCTACGGGGGGCAGCAGTTAAGAATCTTGCGCAATGGGGGAAACCCTGACGCAGCG  
ACGCCGCGTGAGGAGATGAAGGCCTTCGGGTTGTAAAGTCCAATAAGCAGGGAAGAATAAG  
CAGCGGGAAATATTTCGTGTGATGACGGTACCTGCCTAAAGCCCCGGCTAACTACGTGCC  
AGCAGCCGCGGTAATACGTATGGGGCTAGCGTTGTTTCGGAATTATTGGGCGTAAAGGGCG  
TCTAGGCGGGGGATTAAGTTAGGTGTGAAATCCCTGGGCTCAACCCAGGAACTGCATCTA  
AAACTGGTTCTCTTGAGTTCGGGAGAGGAGAGCGGAATTCCCGGTGTAGCGGTGAAATGC  
GTAGATATCGGGAAGAACACCAAGTGGCGAAGGCGGCTCTCTGGCCTAGAACTGACGCTGA  
AGCGCGAAAGCGTGGGGGGCGAACGGGATTAGATACCCGCGTAGTCC  
>Otu12191  
CCAGCCTACGGGTGGCAGCAGCAAGGAATATTGCGCAATGGGCGAAAGCCTGACGCAGCG  
ACGCCGCGTGAGGGAAGAAGGTCTTCGGATTGTAAACCTCTTTTCTTAGGGAAGAATAAT  
GACGGTACCTGAGGAATAAGTCACGGCTAACTACGTGCCAGCAGCCGCGGTAATACGTAG  
GTGGCTAGCGTTATCCGGATTACTGGGCGTAAAGAGGGTGACGGCGGCTCTTCAAGTCG  
GTTATAAAATCTCTTGCTTAACCTAAGAGGGACTGACCGATACTGTTGGGCTGGAGAGTA  
GCAGAGGGAGATGGAATTCGCGGTGTAGTGGTGAAATGCGTAGATATCGGGAGGAACATC  
AGTGGCGAAAGCGTCTCCTAGGCTATTTCTGACGCTCAGGCCCTAAAGCGTGGGGAGCA  
AACAGGATTAGAAACCCCGGTAGTCC  
>Otu12195  
CCAGCCTACGGGTGGCTGCAGTGGGGAATATTGCGCAATGGGCGGAAGCCTGACGCAGCA  
ACGCCGCGTGAGGGATGGAGGCCCTTCGGGTTGTAAACCTCTTTTCTCAGCAGGGAAGAAGCGA  
GAGTGACGGTACCTGCAGAAGAAGCACCGGCTAACTACGTGCCAGCAGCCGCGGTGATAC  
GTAGGGTGCAAGCGTTGTCCGGAATTATTGGGCGTAAAGAGCTCGTAGGCGGTCTGTTCG  
GTCTGCTGTGAAAACCTGGGGCTTAACCCCGGGCCTGCAGTGGGTACGGGCAGACTAGAG  
TGCGGTAGGGGAGACTGGAATTCCTGGTGTAGCGGTGAAATGCGCAGATATCAGGAGGAA  
CACCGATGGCGAAGGCAGGTCTCTGGGCCGTAACTGACGCTGAGGAGCGAAAGCGTGGGG  
AGCGAACAGGATTAGAGACCCCTAGTAGTCC  
>Otu12200  
CCAGCCTACGGGAGGCTGCAGTCGAGGATCTTCGGCAATGGGCGCAAGCCTGACCGAGCG

ACGCCGCGTGCGCGATGAAGGCCTTCGGGTGTGTAAGCGCTGTCGAGGGGGAGGAAAAACC  
CGCAAGGGTCTGACCTATCCCTGGAGGAAGCACGGGCTAAGTTCGTGCCAGCAGCCGCGG  
TAAGACGAACCGTGCAAACGTTGTTTCGGAATCACTGGGCTTAAAGGGCGCGTAGGCGGCT  
TGTCAAGTCCGGGGTGAAATCTTTCGGCTCAACCGGACAAGGGCCTTGATACTGACAAG  
CTGGAGGAAGGTAGGGGCATGTGGAACCTCCGGTGGAGCGATGAAATGCGTTGATATCGG  
AAGGAACGCCGTGGCGAAAGCGACGTGCTGGACCTTTTCTGACGCTGAGGCGCGAAAGC  
TAGGGGAGCAAACGGGATTAGAGACCCTAGTAGTCC

>Otu12201

CCAGCCTACGGGTGGCTGCAGTGGGGAATTTTGCTCAATGGGGGAAACCCTGAAGCAGCG  
ACGCCGCGTGAGGATGAAGGTTCTCTGAATCGTAACTCCTTTTACAGGGGACAAAGGC  
CCGCAAGGGTTTGATGGTACTCTGTGAATAAGCATCGGCCAACTACGTGCCAGCAGCCGC  
GGTAATACGTAGGATGCGAGCGTTGTTTCGGAATTACTAGGTGTAAAGCGTCTGTAGGTGT  
CCCGAAAAGTTTCGTGTGAAAACCCCCGGCTTAACCGGGGAATTGCGCGAAAAACTATCG  
GGATTGAGTGCTAGAGGGGAACTGGAATTCCCGGTGTAGCGGTGAAATGCGTAGATATC  
GGGAGGAACACCAACGGCGAAGGCAGGTTTCTGGCTAGTTACTGACACTGAGAGACGAAA  
GCGTGGGGAGCAAACAGGATTAGAGACCCGAGTAGTCC

>Otu12208

CCAGCCTATGGGTGCTCCAGCTAAGAATATTTCCGCAATGGGCGCAAGCCTGACGGAGCG  
ACGCCGCGTGAGCGATGAAGGCTTTCGGGTGTGTAAGTCTTTTCGTGCAAGAAGATTCTA  
CACCGGGTAAATAATCCGGTGTTTTGACTGTATTGCAGGAAGAAGCCCCGGCTAATTACG  
TGCCAGCAGCCGCGGTAATACGTATGGGGCGAGCGTTATTCGGATTTATTGGGCGTAAAG  
CGTATGTAGGTGGTTTGATAAGTTGAATGTGAAATTTCCGGGCTTAACCCGGAACCTGCA  
TTCAAACCTGCCAGACTTGAGTTCAGAGGAGGATAATGGAATTCCAGGTGTAGGGGTGAA  
ATCTGTAGATATCTGGAAGAACACCAAGTGGCGAAGGCGATTATCTGGTCTGATACTGACA  
CTTAGATACGAAAGCCAGGGGAGCAAACGGGATTAGAAACCCCTGTAGTCC

>Otu12210

CCAGCCTATGGGGTGCAGCAGTGGGGAATATTGGGCAATGGGCGAAAGCCTGACCCAGCC  
ACGCCGCGTGAGTGATGAAGGCCTTCGGGTGTGTAAGCTCTGTGGGGAGGGACGAATAAG  
CGCGTATTAAATAAATACGCGCCCTGACGGTACCTCCTTAGCAAGCACCGGCTAACCATG  
TGCCAGCAGCCGCGGTAATACATGGGGTGCAAACGTTGCTCGGAATCATTGGGCGTAAAG  
CGCGCGTAGGCGGTGCGTTAAGTCGGATGTGAAATCCCTCGGCTTAAGTGAAGTGA  
TCCGAAACTGAATGGCTTGAGTACGAAAGAGGGTTCGCGGAATTCCCGGTGTAGAGGTGAA  
ATTCGTAGATATCGGGAGGAACACCTGTGGCGAAAGCGGCTCACTGGACCACAACCTGACG  
CTGATGCACGAAAGCTAGGGGAGCAAACAGGATTAGATACCCTAGTAGTCC

>Otu12214

CCAGCCTACGGGGTGCACCAGTGGGGAATCCTGCACAATGGGGGAAACCCTGATGCAGCG  
ACGCCGCGTGAGCGATGAAGCCCTTCGGGGCGTAAAGCTCTTTCGACGGGAACGATAATG  
ACGGTACCCGGAGAAGAAGCTGCGGCTAACTACGTGCCAGCAGCCGCGGTAATACGTAGG  
CAGCAAGCGTTGTTTCGGAGTTACTGGGCGTAAAGAGTTCGTAGGCGGTTCTGTAAGTCTG  
GTGTGAAAGCCCTGGGCTCAACCCGGGAAGTGCATTGGAAACTGGGAGACTTGAATACGG  
GAGAGGGTAGTGGAATTCCTGGTGTAGGAGTGAAATCCGTAGATATCAGGAGGAACACCG  
GTGGCGAAGGCGGCTACCTGGACCGATATTGACGCTGAGACGCGAAAGCGTGGGGAGCAA  
ACAGGATTAGAAACCCGGGTAGTCC

>Otu12216

CCAGCCTACGGGTGGCAGCAGTCGAGAATCTTCGGCAATGGACGCAAGTCTGACCGAGCG  
ACGCCGCGTGAGGATGAAGGCCTTCGGGTGTGTAAGTCTTTCGACGGGACAAGAATAAG  
CGGACGTTAATACCGTCCGCGATGACTATCCCGAGAGGAAGCCACGGCTAACTCTGTGCC  
AGCAGCCGCGGTAATTACAGAGGCGGCAAGCGTTGTTTCGGAATCACTGGGCATAAAGGGCG  
CGTAGGTGGTCAAGTAGGTCAAGGGTGAAAGCCCCGGCTCAACCGGGGTCCCGCCTTTG  
AAACCACTTGCTGGAGCGGAACAGGGGAGAGTGGAACCTCGTGGTGGAGCGGTGAAATGC  
GTAGATATCACGAGGAACGCCGGCGGTGAAGACGACTCTCTGGGTTCTAGCTGACACTGA  
GGCGCGAAAGCTGGGGGAGCAAACGGGATTAGAGACCCTTGTAGTCC

>Otu12219

CCAGCCTATGGGTGTCAGCAGTGGGGAATATTGGACAATGGGCGCAAGCCTGATCCAGCC  
ATGCCGCGTGAGTGATGACGGCCTTAGGGTTGTAAAGCTCTTTCGCCAGGGACGATAATG  
ACGGTACCCGCGAGAATAAGCCCCGGCTAACTTCGTGCCAGCAGCCGCGGTAATACGAAGG  
GGGCTAGCGTTGTTTCGGAATCACTGGGCGTAAAGCGCACGCAGGCGGATTGATAAGTCAG  
TGGTGAAATCTCGTTGCTTAACAACGAACGTGCCATTGATACTGTAGGTCTTGAGTACAG

ATGCCGTTGGCGGAATGTGTCATGTAGCGGTGAAATGCATAGATATGACACAGAACACCG  
ATTGCGAAGGCAGCTGACGAAACTGTAAGTACGCTGAGGCACGAAAGCGTGGGGATCAA  
ACAGGATTAGAAACCCAGTAGTCC

>Otu12221

CCAGCCTACGGGACGCTGCAGTGAGGAATTTTCGCGCAATGGCCGCAAGGCTGACGCAGCA  
ACGCCGCGTGGGTGAAGAAGGCCTTCGGGTCGTAAAGCCCTGTCAGGTGGGAAGAACGGC  
CAAGGGGTAAATAGCCTCTTGGAGTGACGGTACCACCAGAGGAAGCACCGGCTAACTCCG  
TGCCAGCAGCCGCGGTAATACGGAGGGTGCAAGCGTTATTCGGAATTACTGGGCGTAAAG  
CGCGTGCAGGCGGGCTAGCAAGTCTGATGTGAAAGCCCTGGGCTTAACCTGGGGAGTGCA  
TTGGAACTGCTAGTCTTGAGTGTTGGAGAGGAAGGGGAATTCCCGGTGTAGAGGTGAA  
ATTCGTAGAGATCGGGAGGAATACCAGTGGCGAAGGCGCCCTTCTGGACGACAACTGACG  
CTGAGACGCGAAAGCGTGGGGAGCGAACAGGATTAGATAACCCGAGTAGTCC

>Otu12223

CCAGCCTATGGGGGGGCTGCAGTGAGGAATATTGCGCAATGGACGAAAGTCTGACGCAGCG  
ACGCCGCGTGAAGGATGAAGGCCCTTTGGGTCGTAAACTTCTGTAGAGAGGGAAGAATAT  
CCGCCTTGGGCGGACTGACGGTACCTCTAAAGTAAGGATCGGCTAACTACGTGCCAGCAG  
CCGCGGTAATACGTAGGATCCGAGCGTTGTCCGGATTTATTGGGTGTAAAGGGAGCGCAG  
GCGGGTCTATAGTCGAGGGTGAGATCTTACAGCTTAACTGTAAAACTGCCTTCGATACTG  
TAGATCTTGAGTGTAGGAAAGGGCGATGGAATTCATGGTGTAGCGGTGAAATGCGTAGAT  
ATCATGAAGAACACCAGTTGCGAAGGCGGTTCGCCTAGCCTATCACTGACGCTCATGCTCG  
AAAGTGTGGGGAGCAAACAGGATTAGATAACCCAGTAGTCC

>Otu12224

CCAGCCTATGGGAGGCTGCAGTGGGGAATATTGGACAATGGGGGAAACCCTGATCCAGCA  
ATGCCGCGTGAGTGATGAAGGCCCTTCGGGTCGTAGAGCTCTTTTACCAGGGATGATAATG  
ACAGTACCTGGAGAATAAGCTCCGGCTAACTCCGTGCCAGCAGCCGCGGTAATACGAAGG  
GGGCTAGCGTTGTTCCGAATCACTGGGCGTAAAGCGCACGCAGGCGGATTGATAAGTCAG  
GGGTGAAATCCCGGGGCTCAACCTCGGAATTGCCTCTGATACTGTCTGTCTTGAGTTCGG  
GAGAGGTTGGCGGAATTCCTAGTGTAGAGGTGAAATTCGTAGATATTAGGAAGAACACCA  
GTGGCGAAGGCGGCCAACTGGCCCGATGCTGACGCTCATGTGCGAAAGCGTGGGGAGCAA  
ACAGGATTAGAAACCCCTTGTAGTCC

>Otu12230

CCAGCCTATGGGATGCTGCAGTGGGGAATATTGGACAATGGGCGCAAGCCTGATCCAGCC  
ATGCCGCGTGAGTGAAGAAGGCCTTAGGGTTGTAAAGCTCTTTTGGCGGGGACGATAATG  
ACGGTACCCGCGAGAATAAGCCCCGGCTAACTTCGTGCCAGCAGCCGCGGTAATACGTAGG  
GTGCGAGCGTTAATCGGAATTACTGGGCGTAAAGCGTGCGCAGGCGGTTATGTAAGACAG  
ATGTGAAATCCCGGGGCTCAACCCGGGACCTGCATTTGTGACTGCATAGCTAGAGTACGG  
TAGAGGGGGATGGAATTCGCGGTGTAGCAGTGAAATGCGTAGATATGCGGAGGAACACCG  
ATGGCGAAGGCAATCCCCTGGACCTGTACTGACGCTCATGCACGAAAGCGTGGGGAGCAA  
ACAGGATTAGAAACCCCTCGTAGTCC

>Otu12244

CCAGCCTATGGGTCGCTGCAGCAACGAATCTTCCCCAATGCCGGAACGGTGAGGGAGCG  
ACGCCGCGTGTGGGATGAAGTACTTCGGTATGTAAACCACTGTTAGGGCTACGAAAGCAA  
TGCGCGCTAATACCGCGCAGAGTTGATCTAGTCCAGAGAAAGGGACGGCTAACTCTGTGC  
CAGCAGCCGCGGTAATACAGAGGTCCCAAGCGTTACTGAGAATCACTGGGTTTAAAGGGT  
GCGTAGGTGGTCCGTTAAGTCGGTTGTGAAATCCCGGGCTCAACCCGGGAAGTCTTCC  
GATACTGGCGGACTTGAGGCCTGTAGGGGTCACTGGAAGTACGGTGAGCGGTGAAATG  
CGTAGATATCGTCAGGAACGCCTGTGGTGAAGACGGGTGACTGGGCAGGTTCTGACACTG  
AGGCACGAAAGCGTGGGGAGCGAACGGGATTAGAGACCCGTGTAGTCC

>Otu12261

CCAGCCTACGGGTTGCAGCAGTCGAGAATCTTCCACAATGGACGAAAGTCTGATGGAGCG  
ACGCCGCGTGATTGATGAAGTCCTTAATCGGACGTAAAGATCTTTTATGAGGGAAGAAGT  
TTATTGACGGTACCTCATGAATAAGAGGCTCCTAATCTCGTGCCAGCAGGAGCGGTAATA  
CGAGAGCCTCGAGCGTTATCCGGAATTATTGGGCGTAAAGGGTGCGTAGGTTGTTTTGTT  
AGTCTTTTGTCAAACCTCGCTGGCTCAACTGGCGGAACGCAAAAGAAACGGCAAAACTTGA  
AAGTGCGAGAGGCGTACGGAACCTTATGGTGTAGGGGTAAATCCGTTGATATCGTAGGGA  
ACACCAAATGCGAAGGCAGTACGCTGGCGCATGTTTGACACTGAAGCACGAAAGCGTGGG  
TCGCGAATGGGATTAGATAACCCCTGTAGTCC

>Otu12265

CCAGCCTATGGGTTGCAGCAGTAGGGAATTGTCCGCAATGGGCGAAAGCCTGACCGCGCG  
ACGCCGCGTGAGGAAGAAGGCCTTCGGGTTGTAAACTCCTTTTATGAGGGACGATTATG  
ACGGTACCTCATGAATAAGGGCCTGCTAACTACGTGCCAGCAGCAGCGTAATACGTAGG  
GCCGAGCGTTACCCGAATTACTGGGCGTAAAGAGTACGTAGGTGTTCCAACAAGTCGG  
TCGTTAAATCTCACGGCTTAACCGCGAGACCGCGAGCGATACTGTTGGAATTGAGTTTTG  
CAGGGGCAAGTGGAATTCCTGGAGTAGGGGTGAAATCCGTTGATACCGGGAGGAACACCA  
ATGGCGAAGGCAACTTGCTAGGCAATGACTGACACTGAGGTACGAAAGCGTGGGGAGCAA  
ACAGGATTAGAAACCCTGGTAGTCC

>Otu12267

CCAGCCTACGGGATGCTGCAGTAGGGAATATTGGGCAATGGGCGAAAGCCTGACCCAGCA  
ACGCCGCGTGAGTGAGGAAGGTTTTTCGGATCGTAAAGCTCTGTCAGGTGGGAAGAAATGT  
ATAGAAGCAAATAGCCTCTATACTTGACGGTACCACCAGAGGAAGCACCGGCTAACTCCG  
TGCCAGCAGCCGCGGTAATACGGGGGGTGAAGCGTTGTTCCGAATTATTGGGCGTAAAG  
AGCGTGTAGGCGGCTAGATAAGTCGGATGTGAAAGCCCTGGGCTTAACCCGGAAGTGCA  
TTTGAAACTGTCTTGCTAGAGTAAGGGAGAGGGAAGTGGAATTCCTGGTGTAGAGGTGAA  
ATTCTGTAGATATCAGGAGGAACACCGGTGGCGAAGGCGACTTTCTGGCCCTATACTGACG  
CTGAGACGCGAGAGCGTGGGGAGCAAACAGGATTAGATACCCCTGTAGTCC

>Otu12271

CCAGCCTATGGGGGGCTCCAGTCGAGAATCTTCCGCAATGGGCGAAAGCCTGACGGAGCG  
ATGCCGCGTGAGGGATGAAGGCCTTCGGGTTGTAAACCTCTGTGCCCCGGGACGAAACCA  
TGACGGTACCGGGAGAGGAAGCTACGGCTAACTACGTGCCAGCAGCCGCGGTAATACGTA  
GGTAGCGAGCGTTATTTCGGATTCCTGGGCGTAAAGGGTCCGCAGGAGGCCTGTCAAGCC  
AGACGTGAAAGCCCAAGGCTCAACCTTGGAATGGCGTCTGGGACTGCCGGGCTTGAGTGC  
ACGAGGGGAAAGCAGAATTCCTGGTGTAGCGGTGGAATGCGTAGATATCAGGAGGAATAC  
CGATGGCGAAGGCGGCTTTCTGGCGTGCAACTGACTCTCAGGGACGAAAGTGTGGGTAGC  
AAACAGGATTAGATACCCCCGTAGTCC

>Otu12297

CCAGCCTATGGGGTGCTGCAGTGGGGAATCTTGGACAATGAGTGAAAACCTTGATCCAGCG  
ATATCACATGAGTGAAGAAGGCCATTTGGTGTGTAAAGCTCTTTCGTTAATGAAGATAATG  
ACAGTAATTAAGTAAGAAGTCCTGGCAATCCTGTGCCAGCAGCCGCGGTAATACAGGA  
GGGGCAAGCGTTATTTCGGATTTAATGGGCGTAAAGGGTGCCTAGGCTATAAATGCGATTA  
AATATGAAAGACCAGAGCTTAACCTCTGGAAGTGTATTTAAAATCAATTTATTTGAGTTAG  
ATAGGGGTTTGTGGAATTCCTAAAGTAAAGGTAATATTTTTCGAGATTAGGCGGAATATC  
CGAAGCGAAGGCGGCATTCTGGATCTACACTGACGCTGAGGCACGAAAGCGTGGGTAGCA  
AACAGGATTAGAAACCCTGTAGTCC

>Otu12307

CCAGCCTACGGGGGGCAGCAGCTAAGAATCTTCCGCAATGGGGGAAACCCTGACGGAGCG  
ACGCCGCGTGATGATGAAGGCCGTAAGGTTGTAAATCCTTTTGTGCGTGAAGAATAAG  
GGAGGGAGTGGAAGCCCTCCTGATGACGTTAGCCGGCGAATAAGCCTCGGCTAATTACG  
TGCCAGCAGCCGCGGTAATACGTATGGGGCAAGCGTTGTTCCGATTTACTGGGCGTAAAG  
CGCATGCAGGTGGTTTTGGTAAGTTGGATGTGAAAGCTCCTGGCTCAACTGGGAGAGGTGCG  
TTCAATACTACCAGACTTGAGAGCAGTAGAGGGAGGTGGAATTCCTGGTGTAGTGGTGAA  
ATGCGTAGATATCGGGAGGAACACCAGTGGCGAAAGCGGCCTCCTGGACTGTTTCTGACA  
CTCATATGCGAAAGCTAGGGTAGCAAACGGGATTAGAGACCCTCGTAGTCC

>Otu12311

CCAGCCTACGGGACGCTGCAGTGGGGAATATTGGGCAATGGGCGAAAGCCTGACCCAGCG  
ACGCCGCGTGAGTGATGAAGGCCTTCGGGTTGTAAAGCCCTTTCGTGCGGAAAGAACAGT  
CCCGTATCTAATACATGCGGGATTTGACGGTACCGCAGGAAGAAGCACCGGCTAACTCCG  
TGCCAGCAGCCGCGGTAATACGGAGGGTGAAGCGTTGTTCCGAATTACTGGGCGTAAAG  
GGCGCGTAGGCGGTAATGTAAGTCAGATGTGAAATCCTTTGGCTCAACTGAAGAACTGCA  
TCTGAAACTGCATAACTCGAGTACAGAAGAGGGAAACGGAATTCCTGGTGTAGAGGTGAA  
ATTCGTAGATATCGGGAGGAACACCAGTGGCGAAGGCGGTTTCCTGGTCTGATACTGACG  
CTGTGGCGCGAAAGCGTGGGGAGCAAACAGGATTAGAAACCCTTGTAGTCC

>Otu12328

CCAGCCTATGGGGGGCAGCAGAGGAGGATCATCGTCAATGGGCGAAAGCCTGAACGTGCG  
ACGCCGCGTGGGGGAAGAAGGCCTTCGGGTCGTAAACCCCTGTCAGAGGTCTCTAAGTTA  
TGCCGCGCAAATAGCGCGGTATATTGACAAGCCTCAGAGGAAGGGACGGCTAACTTCGTG  
CCAGCAGCAGCGGTAATACGGAGGTCCCAGCGTTGTTCCGAATCACTGGGCGTAAAGGG

CGTCTAGGCGGGATGGCAAAGTCGGGTATGAAATCCTTTGGCTCAACCAGAGAATTGTGCC  
CGAAACTGCCGTCCTTGAGTATGGCAGAGGACAGTGGGACTCCTGGTGGAGCGGTGAAAT  
GCGTAGATATCAGGAGGAACGCCGGAGGCGAAAGCGATTGTCTGGGCCATTACTGACGCT  
GAAGCGCGAAAGCTAGGGGAGCAAACGGGATTAGATACCCCCGTAGTCC

>Otu12329

CCAGCCTACGGGTGGCAGCAGCTAAGAATATTCCGCAATGGGAGAAATCCTGACGGAGCG  
ACGCCGCGTGAATGAAGAGGGCAGAAATGTTGTAAAATTCTTTTATACGGGAAGAATAAG  
GTGAGTAGTGGAAGACTCATCGATGACGGTACCGTATGAATAAGCCCCGGCTAACTACG  
TGCCAACAGCCGCGGTAATACGTAGGGGGCTAGCGTTGTTTCGGATTTATTGGGCGTAAAG  
GGCATGTAGGCGGTTATGCAAGTGTGGGTTTAAAGGCGCAGGCTCAACCTGTAGCATGGT  
CTGCAAACCTACATACTAGAGTTCGGGATGGGAGACTGGAATTCCGCGTGTAGGGGTGAA  
ATCTGTAGAGATGCGGAAGAATACCGGCGGCGAAGGCGAGTCTCTGGCCTGAAACTGACG  
CTGAGATGCGAAAGTGTGGGGAGCAAACAGGATTAGAAACCCTTGTAGTCC

>Otu12330

CCAGCCTATGGGACGCTGCAGTCGAGGATCATTCGCAATGGGCGCAAGCCTGACGATGCA  
ACGCTGCGTGAGGATGAAGGCCTTCGGGTCGTAAACTCCTGTCATGCGGGAGCAATGGT  
CCCGTCGCGAATAGCGGCGGGCAGGGATAGTACCGCAAGAGGAAGCCACGGCTAACTCTG  
TGCCAGCAGCCGCGGTAATACAGAGGTGGCGAGCGTTGTTTCGGATTTACTGGGCGTAAAG  
GGCGCGTAGGCGGTCTCGTGTGTTCGGATGTGAAATCCCGTCGCTCAACGACGGAACGCCA  
TTCGAAACTGCGGGACTCGAGTGCAGGAGAGGAGAGCGGAACCTCTTGGTGTAGCGGTGAA  
ATGCGTTGATATCAAGAAGAACACCAAGTGGCGAAGGCGGCTCTCTGGAATGCAACTGACG  
CTGAGGCACGAAAGCGTGGGGAGCAAACAGGATTAGAGACCCCAGTAGTCC

>Otu12341

CCAGCCTATGGGGCGCTGCAGTAAGGAATATTGGGCAATGGACGCAAGTCTGACCCAGCC  
ATGCCGCGTGAAGGATGAATGTCCTATGGATTGTAAACTTCTTTTATGCAGGAAAAACAT  
CCCGTTCGTGAACCGGGACTGATGGTACTGTATGAATAAGCATCGGCTAACTCCGTGCCA  
GCAGCCGCGGTAATACGGAGGATGCAAGCGTTATCCGGATTTCATTGGGTTTAAAGGGTGC  
GCAGGCGGAATAATAAGTCAAGTGGTGAATCTCCCGGCTCAACCGGGAAACTGCCATTGA  
TACTGTTGTTCTTGAGTACAGTTGAAGTGGGCGGAATGTGTTCATGTAGCGGTGAAATGCT  
TAGATATGACACAGAACACCGATAGCGAAGGCAGCTCACTAAGCTGTAACCTGACGCTCAT  
GCACGAAAGCGTGGGGATCAAACAGGATTAGAAACCCCAGTAGTCC

>Otu12348

CCAGCCTATGGGGTGCAGCAGTCGAGAATATTTCGTCAATGCGCGAAAGCGTGAACGAGCG  
ATGCCGCGTGCGGGATGAAGGCCTTCGGGTGTAAACCGCTTTTTTTCAGGGAGCAATTAT  
TGAGCGTACCTGACGAATAAGAGGTTACTAACTCTGTGCCAGCAGTAGCGGTAATACAGA  
GACCTCAAGCGTTATCCGGATTTATTGGGCGTAAAGCGCGGGTAGGTGGACATATTAGTC  
AGATGTCAAATCCTCCGACTTAATCGGAGAACTGCATTTGAAACGGTATGTCTAGAGAAA  
GCGAGAGACCAGTGGAACCTCATGGTGTAGTGGTGTATGCGTTGATATCATGAGGAACAC  
CAAAGGCGAAAGCATCTGGTTGGCACTTTTCTGACACTGATCCGCGAAAGCGTGGGTAGC  
GAATGGGATTAGATACCCTTGTAGTCC

>Otu12349

CCAGCCTACGGGTGTCAGCAGTTGGGAATCTTGGAACAATGGGGGAAACCCTGATCCAGCC  
ATGCCGCGTGAGTGATGAAGGCCTTAGGGTTGTAAAGCTCTTTTACCCGGGAAGATAATG  
ACTATACCGGGAGAATAAGCTCCGGCTAACTTCGTGCCAGCAGCCGCGGTAATACGAAGG  
GGGCTAGCGTTGTTTCGGAATTACTGGGCGTAAAGCGTGCGCAGGCGGTCTCTCAAGTCAG  
GGGTGAAAGCCCAGAGCTCAACTCTGGAATTGCCTTTTGAAACTGTGAGGCTCGAGTGCGG  
GAGAGGTGAGTGGAATTCACAGTGTAGAGGTGAAATTCGTAGATATTGGGAAGAACACCG  
GTGGCGAAGGCGGCTTCCTGGCCCTATACTGACGCTGAGACGCGAAAGCGTGGGTAGCAA  
ACAGGATTAGATACCCCAGTAGTCC

>Otu12350

CCAGCCTACGGGGCGCTGCAGTGGGGAATATAGGACAATGGGGGCAACCCTGATCCAGCA  
ATGCCGCGTGAGTGATGAAGGCCTTCGGGTGTAAAGCTCTTTTGCCAGGGACGATAATG  
ACGGTACCTGGAGAATAAGCCCCGGCTAACTTCGTGCCAGCAGCCGCGGTAATACGAAGG  
GGGCTAGCGTTGTTTCGGAATTACTGGGCGTAAAGGGCGCGTAGGCGGTCTGATAAGTTAG  
GTGTGAAATTCCTGGGCTTAACCTGGGCGCTGCACTTAATACTGTGAGGCTTGAATCCGG  
GAGAGGATAGCGGAATTCACAGTGTAGAGGTGAAATTCGTAGATATTGGGAAGAACACCA  
GTGGCGAAGGCGGCTATCTGGACCGGCATTGACGCTGAGGCGCGAAAGCGTGGGGAGCAA  
ACAGGATTAGAGACCCGAGTAGTCC



>Otu12352

CCAGCCTACGGGTCGCAGCAGTGGGGAGTATTGGACAATGGGGGCAACCCTGATCCAGCA  
ATGCCGCGTGAGTGATGAAGGCCTTAGGGTTGTAAAGCTCTTTTCGACGGGGAAGATGATG  
ACGGTACCCGTAGAAGAAGCCCCGGCTAACTTCGTGCCAGCAGCCGCGGTAATACGAAGG  
GGGCTAGCGTTGTTTCGGATTTACTGGGCGTAAAGGGCGCGTAGGCCGGTGCAATAAGTCAG  
GCGTGAAAGCCCCGGGCTCAACCCGGGAATTGCGCTTGATACTGTTGCGCTTGAATCCAG  
GAGAGGATGGCGGAATTCACAGTGTAGAGGTGAAATTCGTAGATATTGGGAAGAACACCA  
GTGGCGAAGGCGGCCATCTGGCCTGGAATTGACGCTGAGGCGCGAAAGCGTGGGGAGCAA  
ACAGGATTAGAAACCCTCGTAGTCC

>Otu12356

CCAGCCTACGGGATGCAGCAGGCGCGAAAACTTTACAATGCGGGAAACCGTGATAGGGGA  
ACTCTGAGTGCCCGTTAAATCGGGCTGTCCATCAGTTTAAATAACTGGTGAAGAAAGGGC  
CGGGCAAGACCGGTGCCAGCCGCCGCGGTAATACCGGCGGCTCGAGTGGTGGCCACTATT  
ACTGGGCTTAAAGCGTTTCGTAGCTGGTTTGTAAAGTCTCTGGGGAAATCTTCCGGCTTAA  
CCGGAAGGCGTCTCAGGGATACTGGCAGACTAGGGACCGGGAGAGGTGAGAGGTACCTCA  
GGGGTAGGGGTGAAATCTTGTAATCCTTGAGGGACCACCAGTGGCGAAGGCGTCTCACCA  
GAACGGATCTGACGGCAAGGGACGAAAGCTAGGGGCACGAACCGGATTAGATACCCGAGT  
AGTCC

>Otu12357

CCAGCCTACGGGTCGCAGCAGTAGGGAATTTTCCGCAATGGGCGCAAGCCTGACGGAGCA  
ACGCCGCGTGAGGGATGAAGGTCTTCGGATCGTAAACCTCTTTGGAGCGAGACGAATGGG  
TTTTTCGGTGAACAACCGGAACCGTGACTGTATCGCTAGAACAAGTCACGGCTAACTCTG  
TGCCAGCAGCCGCGGTAATACAGAGGTGACTAACGTTGTCCGGAATTATTGGGCGTAAAG  
GGGCGTAGGTGGTTGGATAAGTCAGATGTGAAAGCTCTGGGCTTAACCCAGGAATTGCA  
TTTGATACTGTTGACTTGAGTACGGTAGAGGAGAGTGGAATTCCCAGTGTAGCGGTGAA  
ATGCGTAGATATTGGGAAGAACACCGGTGGCGAAGGCGGCTCTCTGGACCGAAACTGACA  
CTGAAGCGCGAAAGCTAGGGGAGCAAACGGGATTAGAAACCCTGGTAGTCT

>Otu12365

CCAGCCTATGGGTTGCTGCAGTCGGGAAAAATTTTGCAATGCACGAAAAGTGTGACAAAAGCA  
AGCCAAAGTGCTGTTCTTTTTTTTGAACAGCTTTTCGTGAGATGCAAAAAGTCTCACGAATA  
AGGACTGGGTAAGACTGGTGCCAGCCGCCGCGGTAATCCCAGCAGTCCAAGTCGCAGCCA  
CAATTATTGGGTCTAAAACATCCGTAGCTTGCTTTGTAAGTCTTTTGTAAAATCGGGAAT  
CTTAAGTTTCCGGCGCGCAAAAGATACTGCTTAGCTAGAGACCGGGAGACGTAAGAAGTA  
CGGGTAGAGTAACGGTAAAATGTGTTGATCCTACCTGGACTAACAATCGCGAAGGCATCT  
TACGAGAACGGATCTGACAGTGAGGGATGAAGGCTAGGGGCGCAAAACGGATTAGAAACC  
CTAGTAGTCC

>Otu12369

CCAGCCTACGGGGGGCACCAGTGGGGAATATTGGTCAATGGGCGCAAGCCTGAACCAGCC  
ATGCCGCGTGAGTAGGAAGACGGCCCTATGGGTTGTAAACTACTTTTGCAGGGGAATAAACC  
CCGGTACGTGTACCGGGTTGAATGTACTCTGAGAATAAGGATCGGCTAACTCCGTGCCAG  
CAGCCGCGGTAATACGGAGGATCCGAGCGTTATCCGGATTTATTGGGTTTAAAGGGTGCG  
TAGGCGGCCTATTAAGTCAGGGGTGAAAGACGGTAGCTTAACTATCGCAGTGCCTTTGAT  
ACTGATGGGCTTGAATACACTAGAGGTAGGCGGAATGTGACAAGTAGCGGTGAAATGCTT  
AGATATGTCACAGAACACCAATTGCGAAGGCAGCTTACTATGGTGTATTGACGCTGAGG  
CACGAAAGCGTGGGGATCAAACAGGATTAGAGACCCGCGTAGTCC

>Otu12371

CCAGCCTATGGGATGCAGCAGAGGGGAATATTGGGCAATGGGCGAAAGCCTGACCCAGCC  
ACGCCGCGTGAGTGATGAAGGCCTTTGGGTTGTAAACCCCTGTCAGGGGGGACGAAAGCC  
TTCCGGTGAATAGCCGGGAGGGTTGACGGTACCCCCAAAGGAAGCCCCGGCTAACTCCGT  
GCCAGCAGCCGCGGTAATACGGAGGGGGCAAGCGTTATTCGGAATTACTGGGCGTAAAGC  
GCGCGCAGGTGGTGCGGTAAGTGGCAGGTGAAAGCCCTTGGCTTAACCAAGGAAGTGCCT  
GCCAAACTGTTGCGCTGGAGGCCGGGAGGGGAGAGCGGAATTCCTGGTGTAGCGGTGAAA  
TGCGTAGATACCAGGAGGAACACCGGTGGCGAGGGCGGCTCTCTGGACCGGTTCTGACAC  
TCATGCGCGAAAGCGTGGGGAGCAAACAGGATTAGATACCCGTGTAGTCC

>Otu12376

CCAGCCTACGGGTTGCAGCAGTGGGGAATCTTGCAACAATGGGGGAAACCCTGATGCAGCG  
ACGCCGCGTGAGCGATGAAGCCCTTCGGGGTGTAAAGCTCTTTTCGGCGGGAAACGAAACCT  
GACGGTACCCGCAGAAGAAGCTGCGGCTAACTACGTGCTAGCAGCCGCGGTAATACGTAG

GCAGCGAGCGTTGTTCTGGAGTTACTGGGCGTAAAGAGTATGTAGGCGGTGCTGCAAGTTT  
GGTGTGAAATCTCCCGGCTTAACTGGGAGGGAGCGCCGAAAAGTGCAGGGCTAGAGTGCG  
GGAGAGGAAAGCGGAATTCCCTGGTGTAGCGGTGAAATGCGTAGATATCAGGAGGAACACC  
TGCGGTGTAGACGGCTTTCTGGACCACTACTGACGCTGAGGCACGAAAGCGTGGGGAGCA  
AACAGGATTAGAAACCCGAGTAGTCC

>Otu12379

CCAGCCTATGGGGCGCTCCAGTCAAGAATATTCCCCAATGGACGAAAGTCTGAGGGAGCG  
ACGCCGCGTGCAGGATGAAGGGCTTCGGCTTGTAAGTCTGCTTTTCTTTGGGACGAAGCTT  
CGGCTGACGGTACCAAGGGAATAAGAGGTTGCTAACTCTGTGCCAGCAGCAGCGGTAATA  
CAGAGACCTCAAGCGTTATCCGGATTTATTGGGCGTAAAGCGTCCGCAGGCGGCACGTTA  
AGTCTCTCGTCAAATCTATGGGCTCAACTCATAGGCTGCGGGGGAACTGGCGAGCTAGA  
GGTTGGGAGAGGTGAGCGGAATTACCGGTGTAGTAGTAAAATGCGTTAATATCGGTAAAG  
ACACCAAAGGCGAAGGCAGCTCACTGGAACACACCTGACGCTAAGGGACGAAAGCACGGG  
GAGCGAAGCGGATTAGAAACCCCTAGTAGTCC

>Otu12384

CCAGCCTATGGGTGGCTCCAGACGAGAATATTGCAATGGACGAAAGTCTGATCGAGCG  
ACGCCGCGTGGAGGATGAAGTGCTTCGGCATGTAACTCCTTTTGCCAGGGAAAAAGTCT  
ATTGATTGTACCTGGAGAATAAGAGGTTGCTAACTCGTGCCAGCAGCAGCGGTAATACG  
AGTGCCCTCGAGCGTTATCCGGAATTATTGGGCGTAAAGGGTGCCTAGGCGGTTCCGTTAG  
TCCCATGTTAAATCTCCCGGCTCAACCGGGAACCTCGCACGGGAAACGGCGGAACCTATGAG  
GGTGAAGGGGTCTGTGGAACCTCATGGTGTAGCGGTGAAATGCGTTGATATCATGGGGAA  
CACCAAAGCGAAGGCAGCAGACTGGTCCACTTCTGACGCTGAAGCACGAAAGCGTGGGT  
CGCGAATGGGATTAGAGACCCCGTAGTCC

>Otu12389

CCAGCCTACGGGGGGCTGCAGTCGAGAATATTCCCCAATGGGCGAAAGCCTGAGGGAGCG  
ACGCCGCGTGCAGGATGAAGGACTTCGGTTCGTAACTGCTTTTGCCGAGGACGAATACT  
GACGGTACTCGGAGAATAAGAGGTTGCTAACTCTGTGCCAGCAGCAGCGGTAATACAGAG  
ACCTCAAACATTGCCCCGATTTATTGGGCGTAAAGGGTCCGCAGGCGGCCTGGTGTGTCC  
CGCGTTAAATGTCAAGGCTCAACTTTGACACCGCGCTGGATACGACCAAGCTTGAGAGTG  
GGAGAGGCGAGCGGAATTACCGGTGTAGTAGTAAAATGCGTTAATATCGGTAAGAACACC  
AAATGCGAAGGCAGCTCGCTAGAACACTTCTGACGCTCAGGGACGAAAGCGTGGGGAGCG  
AATGGGATTAGATACCCCTGTAGTCC

>Otu12392

CCAGCCTACGGGGGGCACCAGTGGGGGATATTGCACAATGGAGGAAACTCTGATGCAGCG  
ACGCCGCGTGAAGGAAGAAGGTCTTCGGATTGTAAACCTTTGTCTTCAGGGAAGAACGGT  
GACGAAAGTCACTCTGACGGTACCTGAGGAGGAAGCCACGGCTAACTACGTGCCAGCAGC  
CGCGGTAATACGTAGGTGGCAAGCGTTGTCCGGAATTACTGGGTGTAAAGGGTGCGCAGG  
CGGGACAATAAGTTGGATGTGAAATACCCGGGCTCAACTCGGGTGCTGCATTCAAAACTA  
TTGTTCTTGAGTGAAGTAGAGGTAGGCGGAATTCGCGGTGTAGCGGTGAAATGCGTAGAT  
ATCGGGAGGAACACCAGTGGCGAAGGCGGCCTACTGGGCTCTTACTGACGCTGAGGCACG  
AAAGCATGGGTAGCAAACAGGATTAGATACCCGCGTAGTCC

>Otu12395

CCAGCCTATGGGTGCTCCAGTTAAGAATCTTGACAATGGACGCAAGTCTGATCCAGCG  
ACGCCGCGTGAACGATGAAGGTCTTCGGATTGTAAAGTTCGGTAAGATGGGACGAAGAAG  
CTGAAGATAATACCTTCAGTGGTGACGGTACCATCCTAAAGCCTCGGCTAAATACGTGCC  
AGCAGCCGCGGTAATACGTATGAGGCAAGCGTTGTTCGGAATTATTGGGCGTAAAGGGCA  
TCTAGGCGGGATGTTAAGTCAGGTGTGAAAGCCAAGGGCTCAACCCTTGAAGTGCATTG  
ATACTGACGTTCTTGAGTTCGGAAGAGGAAGGCGGAATTCGCGGTGTAGCGGTGAAATGC  
GTAGATATCGGGAAGAACACCGGTGGCGAAGGCGGCCTTCTGGTCTAGAACTGACGCTGA  
CATGCGAAAGTGTGGGGATCAAACGGGATTAGAACCCCTGTAGTCC

>Otu12402

CCAGCCTATGGGACGCACCAGTGGGGAATATTGGGCAATGGGCGAAAGCCTGACCCAGCG  
ACGCCGCTGTGGGCGATGAAGGCCTTCGGGTGTAAAGCCCTGTTGGGTGGAAAGAAGGGT  
TCGGAGACGAATAATCTCTGAACCTTGACGGTACCACCAGAGAAAGCACCGGCTAACTCC  
GTGCCAGCAGCCGCGGTAATACGGAGGGTGCAAGCGTTGTTTCGGAATTACTGGGCGTAAA  
GGGCGCGTAGGTGGTTGCGTAAGTCGGATGTGAAATCCCCGGGCTTAACCCGGGAACTGC  
ACCCGATACTGCGTGACTCGAGTGACAGCAGAGGGAAACGGAATTCCTGGTGTAGAGGTGA  
AATTCGTAGATATCAGGAGGAACACCGGTGGTGTAGACGGCTTTCTGGACCGTAACCTGAC

GCTGAGACACGAAAGCGTGGGTAGCAAACAGGATTAGATACCCCTGTAGTCC

>Otu12407

CCAGCCTTGGGTTCGACAGCAGTGGGGAATATTGGACAATGGGCGCAAGCCTGATCCAGCCA  
TGCCGCGTGAGTGAAGAAGGCCTTAGGGTTGTAAAGCTCTTTTGGCGGGGACGATAATGA  
CGGTACCCGCGAGAATAAGCCCCGGCTAACTTCGTGCCAGCAGCCGCGGTAATACGAAGGG  
GGCTAGCGTTGCTCGGAATCACTGGGCGTAAAGGGTGCCTAGGCGGGTCTTTAAGTCAGG  
GGTGAATGCCGAGGCTCAACTTCGGAAGTGCCTTTGATACTGGAGATCTTGAGTTCGGG  
AGAGGTGAGTGGAACTGCGAGTGTAGAGGTGGAATTCGTAGACATTCGCAAGAACACCAG  
TGGCGAAGGCGGCTCACTGGCCCGATACTGACGCTGAGGTGCGGAAGCGTGGGGAGCAAA  
CAGGATTAGAAACCCCTGTAGTCC

>Otu12420

CCAGCCTATGGGGGGCAGCAGTAAGGGGTATTGCGCAATGGGCGAAAGCCTGACGCAGCA  
ACGCCGCGTGAGGATGAAGTCCCTCGGGATGTAACTCCAATAGTTTGTGAGGAAGTAA  
CCCGGCCTAATACGTCGGGAAGTTGACCAGCAGATGAAAGGGGCGGCTAACTCCGTGCCA  
GCAGCCGCGGTAAGACGGAGGCCCGAGCGTTGTTGGAATTACTGGGCTTAAAGCGCGT  
GTAGGCGGGTTCGGTAAGTGCTTTGTGAAATCCCCGGGCTCAACCCGGGAATAGCTTGGCA  
TACTGCCGGTCTTGAGGCAGGTATGGGTCAATTGGAACCTTAGGTGTAGCGGTGAAATGCG  
TAGATATCTAAGGGAACGCCGGTGGCGAGAGCGGGTGACTGGGCCTGTCCTGACGCTGAG  
ACGCGAAAGCGTAGGGAGCAAACGGGATTAGATACCCGCGTAGTCC

>Otu12424

CCAGCCTACGGGGGGCTGCAGTGGGGAATATTGGTCAATGGGCGAAAGCCTGAACCAGCC  
ACGCCGCGTGAGTGATGAAGGCCTTCGGGTGCTAAAGCTCTGTGGGGAGGGACGAAAGCC  
TGAACATAAACAATGTTTCAGGGTTGACGGTACCTCCTTAGCAAGCACCGGCTGACCCTGT  
GCCAGCAGCCGCGGTAATACAGGGGGTGCAAACGTTGCTCGGAATTATTGGGCGTAAAGC  
GCACGTAGGCGGTCTCGCAAGTTGGATGTGAAAGCCCTCGGCTTAACCGAGGAAGTGCAT  
CCAAAACCTACGAGGCTTGAATATGGAAGAGGGTCGCGGAATTCCTGGTGTAGAGGTGAAA  
TTCGTAGATATCGGGAGGAACACCACTGGCGAAGGCGGCGACCTGGTCCAATATTGACGC  
TGAGGTGCGAAAGCGTGGGGAGCAAACAGGATTAGAGACCCCGTAGTCC

>Otu12429

CCAGCCTATGGGTGGCAGCAGTAGGGAATATTGCACAATGGACGAAAGTCTGATGCAGCA  
ACGCCGCGTGACAGATGAAGGCCTTAGGGTTGTAAAGCTCTTTTACCCGGGAAGATAATG  
ACTGTACCGGGGAGAATAAGCTCCGGCTAACTTCGTGCCAGCAGCCGCGGTAATACGAAGG  
GGGCTAGCGTTGTTTCGGAATTACTGGGCGTAAAGCGCGCGCAGGCGGCCTGACAAGTCAG  
GGGTGAAAGCCCAGAGCTCAACTCTGGGACTGCCCTTGAACTTTTCAGGCTAGAGGACGG  
GAGAGGTGAGTGGAATTCACAGTGTAGAGGTGAAATTCGTAGATATTGGGAAGAACACCG  
GTGGCGAAGGCGGCTCACTGGCCCGTTTCTGACGCTCAGGCGCGACAGCGTGGGGATCAA  
ACAGGATTAGAAACCCGAGTAGTCC

>Otu12436

CCAGCCTACGGGGTGCACCAGGCGGAAAACTTTACAATGCACGAAAGTGTGATAGGGGG  
ACTCAAAGTGCTTATACTTTTAGTATAGGCTTTTGCCAAGTTAAAATTGCTTGGCGAATA  
AGTGATGGGCAAGACTGGTGCCAGCCGCCGCGGTAACCCAGCGTCACGAGTGGGAATCA  
GTATTATTGGGCCTAAGGCGTCCGTAGCAGGTCTTCTAAATTATTTGTGAAATCGCATAG  
CTTAACCTATGCGGATTGCAGATAGGACTGGAAGACTTGGGATCGGGAGAAGTCGAAGGTA  
CTCAGAGGGGAGCGGTAAAATGCGAGAATCCTCTGAAGACCATCTGTTGCGAAGGCGTTC  
GACAATAACGAGTCTGACTGTGAGGGACGAAAGCTAGGGGAGCGAACCAGATTAGAAACC  
CTAGTAGTCC

>Otu12443

CCAGCCTACGGGTTCGACACCAGTAGGGAATATTGGACAATGGGGGAAACCCCTGATCCAGCA  
ACGCCGCGTGAGTGATGAAGCTTCTTGAGTGTAATACTCTGTGAGTGGGGACGAAACGT  
CCGTGGAGGAAATGCCACGGGCCCTGACTGTACCCGCGAGAGGAAGTTCCGGCCAACTCCGT  
GCCAGCAGCCGCGGTAATACGGGGGGAACGAGCGTTGTTTCGGATTTACTGGGCGTAAAGG  
GCACGCAGGTGGGAAAGAAAGTCAGGTGTGAAATCCCGAGGCTTAACCTTCGGGACTGCAT  
TTGATACTTCTTTTCTTGAGTACGAGAGAGGATGGCGGAATTCCTGGTGTAGCGGTGAAA  
TGCGTAGATATCAAGAAGAACACCGGTGGCGAAGGCGGCCATCTGGCTCGATACTGACGC  
TCATGTGCGAAGGCCGGGGGAGCAAACAGGATTAGAGACCCGAGTAGTCC

>Otu12448

CCAGCCTATGGGTTGCAGCAGTCGAGAGGCTTCGTCAATGGGGGAAACCCCTGAACGAGCG  
ACGCCGCGTGAGGGATGAAGGCCTTCGGGTGTAAACCCCTGTGCGCGGGGAGAAGGAT

TCGGCGGCGAACAGTCGCAGGATCTCGACGGTACCGCAAAAAGGAAGCTCCGGCTAACTCC  
GTGCCAGCAGCCGCGGTAATACGGGGGAGCGAACGTTGTTTCGGAATTACTGGGCGTAAA  
GGGCGCGCAGGCGGCCTCATAAGTGGGATGTGAAAGCCCCCTGGCTCAACCAGGGAAATGC  
GTCCCATACTGTGGGGCTTGAGTGCAGAGGAGGATGGGGGAATTCCCGGTGTAGCGGTGA  
AATGCATTGATATCGGGAGGAACACCAGTGGCGAAGGCGCCCATCTGGCCTGCTACTGAC  
GCTCAGGCGCGAGAGCCGGGGGAGCAAACAGGATTAGAGACCCCTGTAGTCC

>Otu12451

CCAGCCTATGGGTTGCTCCAGTAGGGGATATTGGTAATCTACGGAAGTGGGAACCAGCAA  
CGCCGCGTGTGCGATGACGGCCTTCGGGTGTAAAGCACTTTTCATGGGGACGAGGAAGG  
ACGGTACCCGTGGAATAAGCCTCAGCTAACTACGTGCCAGCAGCCGCGGTAAAACGTAGG  
AGGCGAGCGTTATCCGGATTTACTGGGTGTAAAGCGCATGCAGGCGGTTTCGCTAAGTTGG  
GTGTGAAAGCTCCCGCTCAACTGGGAGAGGTGCTCAAGACTGGCGGACTGGAGCGTGG  
TAAGGGAAGGCGGAATTCCGGGTGTAGTGGTGAAATGCGTAGATATCCGGAGGAACACCA  
GTGGCGAAGGCGGCCTTCTGGGCCACGACTGACGCTCAGATGCGACAGCTAGGGGAGCAA  
ACGGGATTAGATACCCGAGTAGTCC

>Otu12453

CCAGCCTATGGGTTGCTCCAGGGACGAATATTTCGTCAATGGACGAAAGTCTGAACGAGCG  
ACGCCGCGTGTGGGAGGAAGTCCTTCGGGATGTAAACCACTGTCAGGGGCTACCAAGTGA  
CCGTTCCCTAACAGGGACGGAAGTTGAGGGGCCCCAGAGGAAGCCACGGCTAACTTCGTGC  
CAGCAGCCGCGGTAAAGACGAAGGTGGCAAGCGTTGTTTCGGAATCACTGGGCTTAAAGGGC  
GCGTAGGCGGCCTGTTAAGCGCCTTGTGAAATCCCCGGCTCAACCGGGGAATTGCTCGG  
CGAACTAGCAGGCTTGAGGCAGGTAAGGGCGTGAGGAACTCTTGGTGGAGCGGTGAAATG  
CGTAGATATCAAGAGGAACGCCGGTGGTGAAGACGTCACGCTGGGCCTGTCCTGACGCTG  
AGGCGCGAAAGCCAGGGGAGCAAACGGGATTAGATACCCAGTAGTCC

>Otu12454

CCAGCCTATGGGGTGCTCCAGTCGGGAAATTTCTGCAATGCGCGCAAGCGTGACAGAGCA  
AGCCAGAGTGCTTTTCTATTATTGAAAAGCTTTTGTGAAATGTAAAAATTTTTACGAATA  
AGGACCGGGCAAGACTGGTGCCAGCCGCCGCGGTAATCCAGCGGTCCGAGTCGCAGCCA  
CAATTATTGGGTCTAAAACATCCGTAGCTTGTCTTATAAGTCTCTTGTGAAATCTGGCTT  
CTTAAAAGTCGGGCGAGCAAGAGATACTGTTTGACTAGAGACTGGGAGACGTAAGAAGTA  
CGTATAGGGTAACGGTAAAATGTGTTGATCCTATATGGACTAACAAGAGCGAAGGCATCT  
TACGAGCACAGATCTGACAGTGAGGGATGAAGGCTAGGGGCGCAAATTGGATTAGAAACC  
CCTGTAGTCC

>Otu12459

CCAGCCTACGGGGTGCAACCAGTAGGGAATATTGGTTAATCTACGAAAGTGGGAACCAGCA  
ACGCCGCGTGACGATGAAGGCCTTCGGGTGTAAAGTGCTTTTTTGAGAGGATGAGGAAG  
GACAGTACTCTTAGAATAAGCTTCGGCTAACTACGTGCCAGCAGCCGCGGTAAAACGTAG  
GAAGCGAGCGTTATCCGGATTTACTGGGCGTAAAGCGTGTGTAGGCGGTTTGATAAGTTG  
GATGTGAAAGCTCCTGGCTTAACTGGGAGAGGTCGTTCAAACTATCAGACTCGAGAGTG  
GTAGAGGGAGGTGGAATTCCGGGTGTAGTGGTGAAATGCGTAGATATCCGGAGGAACACC  
AGTGCGCAAAGCGGCCTCCTGGCCATTTCTGACGCTCAGACACGAAAGCTAAGGTAGCA  
AACGGGATTAGATACCCGCGTAGTCC

>Otu12463

CCAGCCTATGGGGGGCTGCAGTGGGGAATATTCCGCAATGGGCGAAAGCCTGACGGAGCG  
ACGCCGCGTGGGTGATGAAGTCTTCGGATCGTAAAGCCCTGTGGAGCGGGAAGAAGGGT  
GCCGTAAGGCATTTGACAGTACCGCTAAAGCAAGCTACGGCAAACCTCTGTGCCAGCAGCC  
GCGGTAATACAGAGGTAGCGAGCGTTGTTTCGGAATGACTGGGTGTAAAGCGCGTGTAGGC  
GGTCTCGTAAGTTGAATGTGAAATCCCTTGGCTTAACCAAGGAACGGCATTCAAACTGC  
GTTACTTGAGTGCGGAAGAGGAAAGTGGAATTTCTGGTGTAGCGGTAAAATGCGTAGATA  
TCAGAAGGAACACCGGTGGCGAAGGCGACTTTCTGGTCCGCAACTGACGCTGAGACGCGA  
AAGCTAGGGGAGCAAACAGGATTAGATACCCGAGTAGTCC

>Otu12465

CCAGCCTACGGGAGGCTCCAGGCGCGAAACCTCTGCAACGCGCAAGCGTGACAGGGGAAG  
TCTGAGTGGCGGAAACTTAGTTTCCGTCTTTTGCCAAGTGCAAAAAGCTTGGAGAATAAG  
GGTGTGGGCAAAACACACCTTATTTATTGGTGACAAACAGTCAATAGGGAGTGGCCTATGA  
CTGGTGGCAGCCGCCGCGGTAACACCAGCGCCTCGAGTGGTACCCACGAATATTGGGCCT  
AAAGTGTCCGTAGCCGGAAGTGTAAAGTCCGCTGTGAAATGTTGGGGCTCAACCCTAACGC  
GTGACGTGGATACTGTCAAGTCTTGAGAACGGGGGAGGGTCGGAGTACTTCCAGGGTAGG

GGTAAAATCCGTTGAGCCTGGAAGGACTACCAGTGGCGAAGGCGCCGATCCAAAACGTGT  
CCGACGGTGAGGGACGAAAGCTGGGGGAGCGAACGGGATTAGAAACCCGGGTAGTCC  
>Otu12468  
CCAGCCTACGGGTTGCACCAGTGAGGAATATTGGTCAATGGACGCAAGTCTGAACCAGCC  
ATGCCGCGTGAAGGATGAGGGCCTTCTGGGTTGTAACTTCTTTTATCTGGGAAGAAAAC  
TACGATTTCTATTGTAGCCGACGGTACCAGAGGAATAAGCACCGGCTAACTCCGTGCCAG  
CAGCCGCGGTAATACGGAGGGTGCAAGCGTTATCCGGATTTACTGGGTTTAAAGGGTGTG  
TAGGCGGGTCTTTAAGTCAGTGGTGAAATCTCCGAGCTCAACTTGGAAACTGCCATTGAT  
ACTATTGATCTTGAATTTTGTGAGGTAGGCGGAATATGTCATGTAGCGGTGAAATGCAT  
AGATATGACACAGAACACCGATTGCGAAGGCAGCTGACGAACTGTAAGTACGCTGAGG  
CACGAAAGCGTGGGGATCAAACAGGATTAGAACCCCGGTAGTCC  
>Otu12474  
CCAGCCTACGGGTTGCTCCAGTGAGGAATATTGGACAATGGGAGAAAATCCTGATCCAGCA  
ATGTTGCTAGGGTGAGAAAGGCTGTAAAGATAAAGGGCCGTAAACACTCTGTTGCCAAAG  
AAGATAAAGACGGTATTTGGAAAAGTAGTCCCGGCTAACCTCGTGCCAGCAGCCGCGGTA  
ATACGAGGGGGACAAGTGTTATTCTGTTTACTACTGGGCGTAAAGCGTTTTTATAGGTGGTTCT  
TTGCGAGTTAGTAATAAGTTTCAAGAGGGCGACCTGGAATGTTTACTAAGACCATTTTT  
CTAGAGTTTTTGAGGGGTGAGTGGTATTTCTTCAATAAAGTTAAATTTTATGATAGAAG  
AAAGAGGTCCACGGGTGAAGACAACCTCACTAGTCAAACTGACACCAAAGACTAAAGCA  
TGGGGAGCGATCGGGATTAGAGACCCGCGTAGTCC  
>Otu12477  
CCAGCCTACGGGGCGCACCAAGTGAGGAATTTTGCACAATGGGCGAAAGCCTGACGCAGCA  
ACGCCGCGTGAGCGAAGAAGGCCTTCGGGTGTAAAGCTCTGTCAGGGGGAAAGAAGGCA  
CCTGGGTAAATAGCCCAAGGGCTGACGGTACCCCCAAAGGAAGCCACGGCTAACTACGTG  
CCAGCAGCCGCGGTAATACGTAGGTGGCGAGCGTTGTCCGGAATCATTGGGCGTAAAGAG  
CGCGTAGGTGGTTTGTGAGGTCTGATGTGAAATCCTGGGGCTCAACTCCAGAACTGCATC  
GGAAACCGGCTTACTAGAGTCTGGGAGAGGAGAGTGGAATTCCTGGTGTAGCGGTGAAAT  
GCGTAGATATCGGGAGGAACACCGGTAGCGAAGGCGGCTCTCTGGAACAGTACTGACGCT  
GAGACGCGAAAGCGTGGGTAGCAAACAGGATTAGAGACCCCGTAGTCC  
>Otu12479  
CCAGCCTACGGGGGGCAGCAGTGAGGAATTTTGCACAATGGGCGAAAGCCTGATGCAGCG  
ACGCCGCGTGAGCGAAGAAGGCCTTCGGGTGTAAAGTCTGTCAGTGGAACGATAATG  
ACGGTACCCGCTGAGGAAGCTCCGGCTGACTCCGTGCCAGCAGCCGCGGTAAGACGGAGG  
GAGCAAGCGTTGTCCGGAATCACTGGGCGTAAGGAGCTCGTAGGCGGGGGCTTAAGTCTG  
GGAGTAAATCCAACGGCTCAACCGTTGGGTGATCCCGGATACTGGGTCTCTTGAGGACAG  
AAGGGGAAAGGGGAATTCAGGTGTAGCGGTGAAATGCGTAGATATCTGGAGGAACACCG  
GTGGCGAAGGCGCCTTTCTGGTCTGATTCTGACGCTGAGGAGCGAAAGCCAGGGGAGCGA  
ACGGGATTAGATACCCGTGTAGTCC  
>Otu12481  
CCAGCCTATGGGAGGCAGCAGTCGAGAATTTCTTCAACAATGGGCGAAAGCCTGATGGAGCG  
ACGCCGCGTGGGGGATGAATGGCTTCGGCCCGTAAACCCCTGTCGTTTCGGGATCAATGCG  
CTTGACCTAATACGTCAGGCGTTGATAGTACCGGAAGAGGAAGGGACGGCTAACTCTGTG  
CCAGCAGCCGCGGTAATACAGAGGTCCCAAGCGTTGTTTCGGATTCACTGGGCGTAAAGGG  
TGCGTAGGCGGCCAGGTAAGTCTGGTGTGAAATCTCGGAGCTCAACTCCGAAACGGCACT  
GGAACTATCTGGCTCGAGGTGGGAGGGGGGACTGGAATTCCTCGGTGTAGCAGTGAAAT  
GCGTAGATATCGAGAGGAACACCGAGTGGCGAAGGCGAGTCCCTGGACGACACCTGACACT  
GAGGCACGAAAGCTAGGGGAGCAAACAGGATTAGAAACCCTAGTAGTCC  
>Otu12491  
CCAGCCTATGGGTGGCTGCAGTCGAGAATTTTCTCAATGGGCGAAAGCCTGAAGGAGCG  
ACGCCGCGTGGGGGATGAAGGGCTTCGGCCCGTAAATCCCTGTCATTTGCGAACAAAGCT  
TGCGATCTAATAAGTCGCAAGTTGGTAGTAGCGAAAGAGGAAGGGACGGCTAACTCTGTG  
CCAGCAGCCGCGGTAATACAGAGGTCCCAAGCGTTGTTTCGGATTCACTGGGCGTAAAGGG  
TGCGTAGGTGGCGAGGTAAGTTTGATGTGAAATCTCCGGGCTTAACCCGAAACTGCATT  
GAATACTATCTCGCTCGAGGGTTGGAAGGGGGACTGGAATACTTGGTGTAGCAGTGAAAT  
GCGTAGATATCAAGTGGAACACCGAGTGGCGAAGGCGAGTCCCTGGACAACTCCTGATACT  
GAGGCACGAAAGCTAGGGGAGCAGACAGGATTAGAAACCCTTGTAGTCC  
>Otu12495  
CCAGCCTATGGGTCGCTGCAGACGAGAATATTCGACAATGGGCGAAAGCCTGATCGAGCG

ACGCCGCGTGATGGATGAAGTCCTTCGGGACGTAAACATCTTTTATGGGGGAGGAAGTTA  
TTGACGTTACCCCATGAATAAGAGGCTCCTAACTCTGTGCCAGCAGGAGCGGTAATACAG  
AGGCCTCAAGCATTATCCGGAATCACTGGGCGTAAAGGGTGTGTAGGCGGTCTGTGTAGT  
CTTTCGTGAAAGACCGTGGGCTTAACCCATGGGACGCGGGGGAAACGGCACGACTTCGAC  
GACGCGAGAGGTAGAGGGAACTCATGGTGTAGGGGTGAAATCCGTTGATATCATGGGGAA  
CACCAAATGCGAAGGCACTCTACTGGCGCGCTCCTGACGCTGAAACACGAAAGCGTGGA  
ATCGAACGGGATTAGAAACCCGTGTAGTCC

>Otu12496

CCAGCCTATGGGATGCAGCAGTCGAGGATCATTTCGCAATGGGCGCAAGCCTGACGATGCG  
ACGCTGCGTGAGGATGAAGGCCTTCGGGTGTAAACTCCTGTCATTTCGGGAACAACGAG  
CCTGCGGTGAATAGCCGCGGGAAATGATAGTACCGGAAGAGGAAGCCACGGCTAACTCTG  
TGCCAGCAGCCGCGGTAATACAGAGGTGGCGAGCGTTGTTTCGGATTTACTGGGCGTAAAG  
GGTGCCTAGGTGGCTTCGTGTGTTCGGATGTGAAAGCTCACTGCTTAACGGTGAAACGGCA  
TTTCGAAACTGCGGAGCTTGAGTGCAGGAGAGGAGAGCGGAATTCTTGGTGTAGCGGTGGA  
ATGCGTTGATATCAAGAAGAACACCGGTGGCGTAGGCGGCTCTCTAGAATGACACTGACA  
CTGAGGCACGAAAGTTGGGGGAGCAAACAGGATTAGAGACCCGCGTAGTCC

>Otu12498

CCAGCCTACGGGGGGCAGCAGTCGGAATTTTGCTCAATGGACGAAAGTCTGAAGCAGCA  
ACGCCGCGTGAGGGATGAAGGCCTTCGGGTGTAAACCTCTTTTATCAGGGACGATAATG  
ACGGTACCTGATGAATAAGCCACGGCTAACTACGTGCCAGCAGCCGCGGTAATACGTAGG  
TGGCAAGCGTTGTCCGGATTTACTGGGCGTAAAGAGCGCGCAGGCGGTCTTTAAGTCGA  
ATGTGAAAGCCCCCGCTCAACTGGGGAGGGTTCATTTCGATACTGATCGACTTGAAGGCAG  
GAGAGGGTAGTGGAATTCCTGGTGTAGTGGTGAAATGCGTAGATATCGGGAGGATCACCA  
GTGGCGAAGGCGACTACCTGGCCTGTTCTTGACGCTGAGGCGCGAAAGCTGGGGGAGCAA  
ACGGGATTAGATACCCCTGTAGTCC

>Otu12500

CCAGCCTATGGGATGCTGCAGTAGGGAATATTGGGCAATGGGCGAAAGCCTGACCCAGCA  
ACGCCGCGTGACAGATGAAGGTCTTCGGATCGTAAAGTGCTTTTCTGAGAGATGAGAAAG  
GACAGTATCTCAGGAATAAGTCTCGGCTAACTACGTGCCAGCAGCCGCGGTAACACGTAG  
GAGGCAAGCGTTATCCGGATTTACTGGGCGTAAAGCGTGTGCAGGCGGTTTGGTAAGTTG  
GATGTGAAAGCTCCTGGCTCAACTGGGAGAGGTTCGTTCAATACTACCAGACTTGAGAGTG  
GTAGAGGGAGGTGGAATTCCTGGTGTAGTGGTGAAATGCGTAGATATCGGGAGGAACACC  
TGTGGCGAAAGCGGCTCACTGGACCACAACCTGACGCTGATGCGCGAAAGCTAGGGGAGCA  
AACAGGATTAGAGACCCCGTAGTCC

>Otu12519

CCAGCCTATGGGAGGCACCAAGTGGGGAATATTGGACAATGGGCGCAAGCCTGATCCAGCC  
ATGCCGCGTGAGTGAAGAAGGCCTTAGGGTTGTAAAGCTCTTTTGGCGGGGACGATAATG  
ACGGTACCCACAGAATAAGCTCCGGCTAACTTCGTGCCAGCAGCCGCGGTAATACGAAGG  
GAGCTAGCGTTGTTTCGAATTACTGGGCGTAAAGGGCGCGTAGGCGGCTTGATAAGTTGG  
GTGTGAAAGCCCAGGGCTCAACCCTGGAAGTGCCTCAAGACTATCTTGCTTGAATTCGG  
TAGAGGTTGGTGGAATTCCTAGTGTAGAGGTGAAATTCGTAGATATTGGGAAGAATATCC  
GTGGCGAAGGCGGCTCACTGGACCACACTGACGCTGAGGCGCGAAAGCGTGGGGAGCAA  
ACAGGATTAGAAACCCCTCGTAGTCC

>Otu12521

CCGCCTATGGGGGGCAGCAGTGAGGAATATTGCACAATGCCCGAAAGGGTGATGCAGCGA  
CGCCGCGTGAAAGATGAAGGCCCTATGGGTCTGTAAACTCTTTTGGAGGGGAAGAACGTA  
TCGCTACAGGCGATATTGACTGTACCCCTAGAAAAAGCATCGGCTAACTACGTGCCAGCA  
GCCGCGGTAATACGTAGGATGCGAGCGTTGTCCGGAATCACTGGGTGTAAAGGGAGCGCA  
GGCGGTTTAGCAAGTCATTGGTGAAATTCTCAGGCTCAACCTGGGGGCTGCCAATGATAC  
TGCTGATCTTGAGTGTGGAAGAGGCGGATGGAATTCCTGGTGTAGCGGTGAAATGCGTAG  
ATATCAGGAAGAACACCGATGGCGAAGGCAGTCCACTGGTCCATTACTGACGCTCATGCT  
CGAAAGCGTGGGGATCAAACAGGATTAGATACCCCTGTAGTCC

>Otu12527

CCAGCCTATGGGTCGCAGCAGTCGAGAATTTTCTCAATGGGCGAAAGCCTGACCAAGCG  
ACGCCGCGTGAGGATGAAGGCCTTCGGGTGTAAAGTCCTGTGAGGGGGGATCAAGGGG  
CAACCTTGAGTGATCCCTGGAGGAAGCTCGGGCTAAGTTTCGTGCCAGCAGCCGCGGTAAG  
ACGAACCGAGCGAACGTTGTTTCGGAATCACTGGGCTTAAAGGGCGCGTAGGCGGCTTACC  
AAGTCAGGGGTGAAATTTTTCGGCTTAACCGTAACAGTGCCTTTGATACCGGTAGGCTCG

AGGGAGATAGGGGTCTGCGGAACCTTCTGGTGGAGCGGTGAAATGCGTTGATATCGGAAGG  
AACCCCGGTGGCGAAAGCGGCGGACTGGATCTCTTCTGACGCTGAGGCGCGAAAGCTAGG  
GGAGCAAACGGGATTAGAAACCCGAGTAGTCC

>Otu12531

CCAGCCTACGGGGGGCTGCAGCTAAGAATCTTCCGCAATGGGCGAAAGCCTGACGGAGCG  
ACGCCGCGTGGACGAAGAAGGCCGAAAGGTTGTAAAGTCCTTTTCTCTGTGAAGAATAAG  
GGTGAAGGAAATGTTACCTGATGACGTTAGCAGAGGAATAAGCCCCGGCCAATTACGT  
GCCAGCAGCCGCGGTAATACGTAAGGGGCGAGCGTTGTTTCGGAATTATTGGGCGTAAAGG  
GCGCGTAGGCGGTCTGGTAAGTCTGGTGTTTAATCCCGCGGCTTAACCGTGGAAGAGCAC  
TGGAACCTGTCTGGGCTTGAGTTCAGGAGGGGGTACTGGAATTCAGGTGTAGGGGTGAAA  
TCTGTAGATATCTGGAAGAACACCGGTGGCGAAGGCGAGTACCTGGCCATGGACTGACGC  
TGAGGCGCGAAAGCGTGGGGAGCAAACAGGATTAGATACCCGAGTAGTCC

>Otu12533

CCAGCCTATGGGAGGCAGCAGTCGAGAATAATTGTCAATGCTCGAAAGAGTGAACATGCG  
ACGCCGCGTGGGGATGAAGGCCCTTGGGTTGTAAACCGCTTTTATAAGGGAATAATGTA  
ATGATGGTACCTTATGAATAAGAGGTTACTAAGTCTGTGCCAGCAGTAGCGGTAATACAG  
AGACCTCAAGCGTTATCCGGATTTATTGGGCGTAAAGAGCATGTAGGCGGATATATTAGT  
CAGACGTCAAATCTTCGAGCTTAAGTTCGAAAAGTTCGTTTGAACCGGTATATCTAGAGGA  
AGTGAGAGACCAGTGGAACATATGGTGTAGCAGTGAAATGCGTTGATATCATATGGAACA  
CCAAAGGCGAAGGCATCTGGTGGCACTTTCCTGACGCTGAGATGCGAAAGCGTGGGTAG  
CGAATGGGATTAGATACCCGCGTAGTCC

>Otu12538

CCAGCCTACGGGATGCTGCAGTGGGGAATTTTGGACAATGGACGCAAGTCTGATCCAGCC  
ATGCCGCGTGAGTGAAGAAGGCCCTTCGGGTTGTAAAGCTCTTTTGTCCGGGAGCAAATCC  
TGGTTCCTAATACGAACCGGGATGAGAGTACCGGAAGAATAAGGACCGGCTAACTACGT  
GCCAGCAGCCGCGGTAATACGTAGGGTCCAAGCGTTAATCGGAATTACTGGGCGTAAAGG  
GTGCGCAGGTGGTTACGCAAGTCTGATGTGAAATCCCCGGGCTCAACCTGGGAAGTGCAT  
TGGATACTGTGTAAGTAGAGTGTGGCAGAGGGGGGTGGAATTCGCGGTGTAGCAGTGAAA  
TGCGTAGAGATGCGGAGGAACACCAATGGCGAAGGCAGCCCCCTGGGTTAACACTGACAC  
TCATGCACGAAAGCGTGGGGAGCAAACAGGATTAGAAACCCCGTAGTCC

>Otu12539

CCAGCCTACGGGTGGCAGCAGTGGGGAATCTTGCGCAATGGGCGAAAGCCTGACGCAGCA  
ACGCCGCGTGTTGTGATGAAGGTCTTCGGATCGTAAAGCACTGTCGGGAGGGACGAATAAG  
GGCCGGGTGAACAATCCAGCATGATGACGGTACCTCCAAAGGAAGCACCGGCTAACTCTG  
TGCCAGCAGCCGCGGTAATACAGAGGGTGAAGCGTTGTTTCGGAATTATTGGGCGTAAAG  
CGCGTGTAGGCGGTCTCGCAAGTTCGGATGTGAAAGCCCTCGGCTTAACCGAGGAAGTGCG  
TTCGAAACTACGAGACTTGAGTACCGGAGAGGGTGGCGGAATTCCCGGTGTAGAGGTGAA  
ATTCGTAGATATCGGGAGGAACACCAGTGGCGAAGGCGGCCACCTGGACGGCTACTGACG  
CTGAGACGCGAAAGCGTGGGGAGCAAACAGGATTAGAAACCCCGTAGTCC

>Otu12546

CCAGCCTATGGGAGGCAGCAGTCGAGAATAATCCACAATGGGGGAAACCCCTGACGCAGCA  
ACGCCGCGTGGGTGAAGAAGGCCCTTCGGGTCGTAAAGCCCTGTCAGGTGGGAAGAAAGGT  
TTCAAGGAGAAACACTTGGGATTTGACGGTACCACCAGAGGAAGCACCGGCTAACTCCGT  
GCCAGCAGCCGCGGTAATACGGAGGGTGCAAGCGTTATTCGGAATTACTGGGCGTAAAGC  
GCGTGTAGGCGGGGATGCAAGTCTGATGTGAAAGCCCTGGGCTTAACCTGGGAAGTGCAT  
TGGAACCGGCATCTCTTGAGTACTGGAGAGGAAGGGGGAATTCCCGGTGTAGAGGTGAAA  
TTCGTAGAGATCGGGAGGAATACCAGTGGCGTAGGCGCCTTTCTGGACGGTTACTGACGC  
TGAGACGCGAAAGCGTGGGGAGCAAACAGGATTAGATACCCCTCGTAGTCC

>Otu12564

CCAGCCTATGGGGGGCACCAAGTGAGGAATCTTCCGCAATGGGCGAAAGCCTGACGGAGCG  
ACACCGCGTGAGGATGAAGCCCTTTCGGGCGTAAACTTCTGTTCTGAGGGACGAAATT  
TTTGACGGTACCTCAGGAGAAAGCATCGGCTAACCTGTGCCAGCAGCCGCGGTAAGACA  
GGGGATGCAAGCGTTACTCGGAATTACTGGGCGTAAAGCGTCTGCAGGCGTTCTCCACG  
TCTGGCGTCAAAATGACGGAGCTTAAGTCCGTCAACGTGCCGGAACGAGGAGAATTGAGT  
CATTCAGAGGCATCTGGAATGTCGTGTGTAGGGGTAAAAATCCGTTGATCCACGATGGAAC  
GCCAAAAGCGAAGGCAGGATGCTGGGGATGTACTGACGCTCAGAGACGAAAGCGTGGGGA  
GCAAAGGGGATTAGAAACCCGTGTAGTCC

>Otu12574

CCAGCCTACGGGGTGCACCAGTCGAGAATTTTTCACAATGGGCGCAAGTCTGATGGAGCG  
ACGCCGCGTGAGGATGAAGGCCTTCGGGTGTAAAGTCTTTTCGTGCGGGAAGATTTTT  
CCGCCGGTGAACAATCGGCGGGACCGACTGTACCGCAGGAAGAAGCCCCGGCTAATTACG  
TGCCAGCAGCCGCGGTAAACACGTATGGGGCGAGCGTTATTCGGATTCAATTGGGCGTAAAG  
GGTATGCAGGGGGCTTGCTAAGTCGGGAGTGAAATTTCCAGGCTCAACCTGGAACCTTGCT  
TTCGATAATGGCAGGCTAGAGTTTGAAGAGGAGAATGGAATTCAGGTGTAGGGGTGAA  
ATCTGTAGATATCTGGAAGAACCAGTGGTGAAGACGATTCTCTGGTCCAAAACCTGACC  
CTCAGATACGAAAGCCAGGGGAGCAAACGGGATTAGAAACCCTTGTAGTCC

>Otu12582

CCAGCCTACGGGGTGCACCAGTGGGGAATTTTGCGCAATGGGGGAAACCCTGACGCAGCA  
ACGCCGCGTGAGTGATGAAGGCCTTCGGGTGCTAAAGCTCTGTCAAGTGGGAAAGAAGTGT  
ATTGCGGCTAATACCTGCGATACTTGACGGTACCCACAAAGGAAGCACCAGGCTAACTCCG  
TGCCAGCAGCCGCGGTAAACGAGGGGTGCGAGCGTTGTTCGGATTTATTGGGCGTAAAG  
CGCGTGTAGGCGGCTTCTTAAGTCAGATGTGAAAGCCCCGGGCTCAACCTGGGAAGTGCA  
TTGGAACCTGGGGAACCTGAATACGGGAGAGGGTAGTGGAATTCCTGGTGTAGGAGTGAA  
ATCCGTAGATATCAGGAGGAACACCGGTGGCGAAGGCGGCTACCTGGACCGATATTGACG  
CTGAGACGCGAAAGCGTGGGGAGCAAACAGGATTAGAGACCCTAGTAGTCC

>Otu12583

CCAGCCTATGGGTGCGAGCAGTCGAGAATAGTCTACAATGGACGAAAGTCTGATAGTGCG  
ACGCCGCGTGAGCGAAGAAACCTTTTCGGGTGTAAAGTCTTTTCTGTGCGAGCAGTGGT  
GGCTAGAGTAATATGCTGGTCATTTTGATATTAGTACAGGAATAAGCCACGGCTAACTCC  
GTGCCAGCAGCCGCGGTAAACAGGGGGTGGCAAGCGTTGTCCGGAATTACTAGGCGTAA  
GGGCAGGTAGGCGGATTTGTAAGTCGGACGTTAAATCCTCAGTCTCAAGCTGAGACATGC  
GTTGATACTGTGAATCTTGAATATGGTGGGGGAAGACGGAATTCAGGTGTAGCGGTGG  
AATGCGCAGATATCTGGAGGAACACCGAAGGCGAAGGCAGTCTTCTATACCAAATTTGAC  
GCTAAACTGCGAAGGTGTGGGGATCAAACAGGATTAGAAACCCCCGTAGTCC

>Otu12585

CCAGCCTACGGGGGGCTCCAGTTAGGAATATTGCACAATGGGCGAAAGCTTGATGCAGCG  
ACGCCGCGTGGGGGATGACGTCTTTTCGGGATGTAAACCCCTTTTGTGCGGAAAGAACTAA  
GACGGTACCCGGCGAATAAGCCCCGGCTAACTACGTGCCAGCAGCCGCGGTAAATACGTGG  
GGGGCGAGCGTTGTCCGGAATTACTGGGCGTAAAGAGCGTGTAGGCGGTCCGGTCAAGTCG  
GATGTGAAATCTCCAGGGCTCAACCCGGAACCTGCATTTGATACTGACTGACTTGAGAGA  
TGAAGGGGCAAGTGAATTCCTGGTGTAGCGGTGAAATGCATTGATATCGGGAGGAACAC  
CCGTAGTGAAGGCGGCTTGCTGGGCATCTTCTGACGCTGAGACGCGAAAGCAGGGGGAGC  
AAACGGGATTAGATACCCGCGTAGTCC

>Otu12600

CCAGCCTACGGGGTGCACCAGTCGAGAATCTTCCGCAATGGGCGAAAGCCTGACGGAGCG  
ACGTTACGTGAATGATGAAGCCCTTAGGGGTGTAAAGTCTTTTATATGGGAGGAAGCCG  
CAAGGCAGACAGTACCATATGAATAAGGGGATCCTAATTCTGTGCCAGCAGGAGCGGTAA  
TACAGAATCCCCAAGCGTTACCCGATTTATTGGGCGTAAAGGGTTCGTAGGTGGTATAG  
TAAGTTGAAAGTTAAACTCATCGGCTTAACCTTTGAGGTGCTTTCAATACTGCTACACT  
TGAGGGCGTTAGGGGTAGCGGAACCGACAGAGTAGGGGTGAAATCCGTTGATATTGTGCG  
GGAACACCAAAAGCGAAGGCAGCTAACTAGGACGACCCTGACACTGAGGAACGAAAGCGT  
GGGGAGCAAACAGGATTAGAAACCCCCGTAGTCC

>Otu12602

CCAGCCTATGGGGGGCTGCGAGTGGGGAATATTGGACAATGGGGGCAACCCTGATCCAGCC  
ATGCCGCGTGAGTGATGAAGCCCTTAGGGGTGTAAAGTCTTTTCGGCGGGGACGATAATG  
ACGGTACCCGCGAGAAGAAGCCCCGGCTAACTTCGTGCCAGCAGCCGCGGTAAATACGAAGG  
GGGCTAGCGTTGCTCGGAATCACTGGGCGTAAAGCGCACGTAGGCGGATCTTTAAGTCAG  
GGGTGAAATCCCAAGGCTCAACCTTGGAACGCTTTTGATACTGGGGATCTCGAGTCCGG  
AAGAGGTTGGTGGAACCTCCGAGTGTAGAGGTGAAATTCGTAGATATTAGGAAGAACACCA  
GTGGCGAAGGCGGCCAACTGGCCCGATACTGACGCTCATGTACGAAAGCGTGGGGAGCAA  
ACAGGATTAGATACCCTCGTAGTCC

>Otu12623

CCAGCATGGGTGCTCCAGTGGGGAATATTGGACAATGGGCGCAAGCCTGATCCAGCCAT  
GCCGCGTGAGTGATGACGGCCCTAGGGTTGTAAAGTCTTTTACCCACGACGATAATGAC  
GGTAGTGGGAGAAGAAGCCCCGGCTAACTTCGTGCCAGCAGCCGCGGTAAATACGAAGGG  
GCTAGCGTTGTTCCGATCTACTGGGCGTAAAGCGCACGTAGGCGGATCTTTAAGTCAGGG



GTGAAATGCCGAGGCTCAACTTCGGAATTGCCTTTGATACTGTCTATCTTCGAGTTCGGG  
AGAGGTTGGCGGAATTCCTAGTGTAGAGGTGAAATTCGTAGATATTAGGAAGAACACCAG  
TGGCGAAGGCGGCCAACTGGCCCGATACTGACGCTCATGTACGAAAGCGTGGGGAGCAAA  
CAGGATTAGAGACCCCTGTAGTCC

>Otu12629

CCAGCCTATGGGGGGCAGCAGTGGGGAATATTGGACAATGGGCGCAAGCCTGATCCAGCC  
ATGCCGCGCGAGTAAGAAGGCCTTAGGGTTGTAAAGCCCTTTTGGCGGGGAAGAAGGCC  
TGAGTTGAACAGGCTTGGGGGGTGACGTTACCCGCTGAAGAAGCACCGGCCAACTCCGTG  
CCAGCAGCCGCGGTAATACGAGGGTGCGAGCGTTAATCGGAATTACTGGGCGTAAAGCG  
CACGTAGGCGGTGGGTAAAGTCAGTTGTGAAAGCCCCGGGCTCAACCTGGGAATGGCAAT  
TGGTACTGACCGACTGGAGTGTAACAGAGGACCGTGGAATTCCTGGTGTAGCGGTGAAAT  
GCGTAGAGATCGGGAAGAACACCGATGGCGAAGGCAGCGGTCTGGGTAAACTGACGCT  
GAAGAGCGAAAGCGTGGGGAGCAACCAGGATTAGATACCCTAGTAGTCC

>Otu12631

CCAGCCTATGGGATGCTGCAGTCGGGAAACTTCTGCAATGCGCGCAAGCGTGACAGAGCA  
AACCAGAGTGCGTTTCCATATTGGAAACGCTTCTGTGAGATGCAAAAAGTCTTACGAATA  
AGGACCGGGCAAGACTGGTGCCAGCCGCCGCGGTAATCCCAGCAGTCCGAGTCGCAGCCA  
CATTTGTTGGGTCTAAAACATCAGTAGCTCGCCATCTAAGTCTCTTGTCAAATCGGGCCT  
CTTAAGGGTCCGGCGAGCAAGAGATACTGTTTGGCTAGAGACCGGGAGACGTAAGGAGTA  
CTATGGGAGTAGCGGTAAAATGCGTTGATCCTCATAGGACTAACAAATAGCGAAGGCACCT  
TACGATAACGGTTCTGACAGTGAGGGATGAAGGCTAGGGGCGCAAAGTGATTAGATACC  
CCAGTAGTCC

>Otu12638

CCAGCCTATGGGGGGCAGCAGTGAGGAATATTGGACAATGAACGACAGTTTGATCCAGCA  
ATACTAAATGGGTGATGAACGCTCAAATGGCCGTAAAACCCCTTTCGACGAGGAAGATCAT  
GACATTAATCGAGGAAAGAAGTCCTGGCCAATGCCGTGCCAGCAGCCGCGGAAATACGGT  
AAGGGCAAGCGTTATTCATAATTAATAGGCGTAAAGGGTGCGTAGGTGGTTTTAAAAAAA  
TTTTTGTATAAAAAACAAAGCGGAACCTTTGTAAATTGCAAAAAAATGTTAATTCATGAGT  
TAGACTCGCGTTAATAGAATATCTAAAGTAATGATAAAATGTTGCGAGATTAGATGGAAT  
ACCGAAAGCGAAGGCAGTTTTTCTAGAGCTAACTGACATTGAGGCACGAAGGCATAGGGAT  
CAAATGGGATTAGAGACCCCTGTAGTCC

>Otu12646

CCAGCCTACGGGAGGCAGCAGTAAGGAATATTGGTCAATGGACGCAAGTCTGAACCAGCC  
ATGCCGCGTGAAGGATGAAGGCCTTCTGGGTGTAAACTTCTTTTATCTGGGAAGAAAAC  
TACGGTTTCTACTGTAGCCGACGGTACCAGAGGAATAAGCACCGGCTAACTCCGTGCCAG  
CAGCCGCGGTAATACGAGGGTGCAAGCGTTATCCGGATTTACTGGGTTTAAAGGGTGTG  
TAGGCGGGTCTTTAAGTCAGTGGTGAAATCTCCGAGCTCAACTTGGAACCTGCCATTGAT  
ACTATTGATCTTGAATTCTGTTGAGGTGGGCAGAATATGTCATGTAGCGGTGAAATGCTT  
AGATATGACATAGAACCCCAATTGCGAAGGCAGCTCACTAACCAGACATTGACGCTGAGG  
CACGAAAGCGTGGGGATCAAAACAGGATTAGAAACCCCTCGTAGTCC

>Otu12647

CCAGCCTACGGGGCGCTGCAGTCAAGAACATTCGACAATGGGCGAAAGCCTGATCGAGCG  
ACGCCGCGTGCAAGGATGAAGGTCTTCGGATCGTAAACTGCTTTTATGTTTTAGAAAGTTA  
TTGATCGAGACATGAATAAGGAGCTGCAAACTTCGTGCCAGCAGCCGCGGTAATACGAAG  
GCTCCAAGCGTTATCCGGATTTATTGGGCGTAAAGGGCGCGTAGGGGGTTTTGTGTGTTT  
CCGGTTAAAGACCGAGGCTTAACCTTCGGTATCGCCGGGAAAACCTACATAACTAGAGGGTG  
TTAGAGGTCTGTAGAACGCACGGTGTAGGGGTGAAATCCGTTGATATCGTGCGGAATACC  
AAAGGCGAAGGCAGCAGACTGGGACATTCTGACCCTGAGGCGCGAAAGCGTGGGGAGCA  
AAAAGGATTAGATACCCTCGTAGTCC

>Otu12663

CCAGCCTATGGGATGCAGCAGTCGGGGATCTTTTGCAATGCGCGCAAGCGTGACAAAGCG  
AGCCAAAGTGTTTTCTTTTAGAAAACTTTTGCCAGCTGTAAAAAGGCTGGCGAATAA  
GGACTGGGCAAGACCGGTGCCAGCCGCCGCGGTAATCCCGGCAGTCCAAGTCGCAGCCAC  
ATTTATTGGGTCTAAAATATCCGTAGCTTGCTTAAAAAGTTTCTTGTGAAATTCTGTCTC  
TTAAGGTGAGAGCGCGCAAGAAATACTCTTAAGCTAGAGACCGGTAGGCGTAAGAAGTAC  
AGTCAGGGTAGTGGTAAAATATTTTAATCCTGATTGGACTCACAGTCGCGAAGGCGTCTT  
ACGAGGACGGTTCTGACAGTGAGGGATGAAGGCTAGGGGCGCAAAATGGATTAGAAACCC  
TCGTAGTCC

>Otu12673

CCAGCCTATGGGACGCAGCAGTGAGGAATATTGGTCAATGGACGGAAGTCTGAACCAGCC  
ATGCCGCGTGCAGGAAGAAGGCCCTATGGGTTCGTAAACTGCTTTTGTACCAGAGAAAACC  
CGAGTACGTGTACTCGGTTGATAGTATGGTAAGAATAAGCATCGGCTAACTTCGCGCCAG  
CAGCCGCGGTAAGACGAAGGATGCAAGCGTTATCCGGATTCATTGGGTTTAAAGGGTGCG  
TAGGCGGACTTATAAGTCAGTGGTGAAATCTCGTCGCTTAACGACGAACGTGCCATTGAT  
ACTGTAGGTCTTGAGTACAGATGCCGTTGGCGGAATGTGTCATGTAGCGGTGAAATGCAT  
AGATATGACACAGAACACCGATTGCGAAGGCAGCTGACGAACTGTAACTGACGCTGAGG  
CACGAAAGCTGGGGGAGCAAACCGGATTAGAAACCCGTGTAGTCC

>Otu12674

CCAGCCTATGGGGGGCACCAGTCGAGAATTTTTTCACAATGGGGGAAACCCTGATGGAGCG  
ACGCCGCGTGGGGGATGAATGGCTTCGGCCCGTAAACCCCTGTCATTTGCGAACAAATTT  
TGCGCATGAACAATGCGCAAATTGATTGTAGCGGAAGAGGAAGGGACGGCTAACTCTGTG  
CCAGCAGCCGCGGTAATACAGAGGTCCCAAGCGTTGTTTCGGATTCACTGGGCGTAAAGGG  
TGCGTAGGTGGCAAGGTAAGTCTGATGTGAAATCTCGCGGCTTAACCGCGAAACGGCATC  
GGATACTATTTAGCTAGAGGGTCGGAGGGGGGACTGGAATTCTCGGTGTAGCAGTGAAAT  
GCGTAGATATCGAGAGGAACACCAGTGGCGAAGGCGAGTCCCTGGACGACTCCTGACACT  
GAGGCACGAAAGCTAGGGGAGCAAACAGGATTAGATACCCTAGTAGTCC

>Otu12679

CCAGCCTATGGGTTGCTGCAGTGGGGAATTTTGGACAATGGACGCAAGTCTGATCCAGCC  
ATTCCGCGTGCAGGATGAAGGCCCTTCGGGTGTAAACTGCTTTTGTACGGAACGAAAAGG  
CTCTGATTAATACTCGGGGCTCATGACGGTACCGTAAGAATAAGCACCGGCTAACTACGT  
GCCAGCAGCCGCGGTAATACGTAGGGTGCAAGCGTTAATCGGAATTACTGGGCGTAAAGC  
GTGCGCAGGCGGTTATATAAGACAGATGTGAAATCCCCGGGCTCAACCTGGGAACTGCAT  
TTGTGACTGTATAGCTAGAGTACGGTAGAGGGGGATGGAATTCGCGGTGTAGCAGTGAAA  
TGCGTAGATATGCGGAGGAACACCGATGGCGAAGGCAATCCCCTGGACCTGTACTGACGC  
TCATGCACGAAAGCGTGGGGAGCAAACAGGATTAGAGACCCCTCGTAGTCC

>Otu12680

CCAGCCTATGGGACGCAGCAGTCGAGAATTTTTTCACAATGGGGGCAACCCTGATGGAGCG  
ACGCCGCGTGGAGGATGAAGGCCCTTCGGGTTCGTAAACTCCTGTCCTACAGAACAAAGAGT  
ATAACAGCTAACATCTGTTATGCTTGATAGTATGTGGAGAGGAAGGGACGGCTAACTCTG  
TGCCAGCAGCCGCGGTGATACAGAGGTCCCAAGCGTTGTTTCGGATTTACTGGGCGTAAAG  
GGTGCGTAGGAGGCTGGGAAAGTCGGATGTGAAAGCTCACTGCTTAACGGTGAAACTGCA  
TTCGAAACTTCCTGGCTAGAGGATCAGAAAGGAAAGCGGAATTCTTGGTGTAGCGGTGAA  
ATGCGTAGATATCAAGAGGAACGCCGATGGCGAAGGCAGCTTCTTGAGGATTCTCTGACT  
CTGAGGCACGAAGGCTAGGGTAGCAAACAGGATTAGATACCCCCGTAGTCC

>Otu12686

CCAGCCTATGGGACGCTGCAGTGAGGAATATTGCGCAATGAGCGAAAGCCTGACGCAGCA  
ACGCCGCGTGAAGGATGAAGGTGCTCTGCATTGTAAACTTCTGTAGGGGGGGACGAATAT  
CCCGGTATTGCCGGAATGACGGTACCCCCAAAGTAAGCACCGGCTAACTCCGTGCCAGC  
AGCCGCGGTAATACGGAGGGTGCAAGCGTTGTCCGGATTTATTGGGTGTAAAGGGCGTGT  
AGGCGGAGTGATGTGTGAGAGTGAAATCGTGCGGCTTAACCGTATCAATTGCTCTCGAA  
ACTGTCACCCCTTGAGTACGAGAGGGGCAGATGGAATTCCGGGTGTAGCGGTGGAATGCGT  
AGATATCTGGAAGAACACCGGTGGCGAAGGCGGTCTGCTGGCTCGATACTGACGCTGAGG  
CACGAAAGCCAGGGGAGCAAACGGGATTAGAAACCCCAGTAGTCC

>Otu12687

CCAGCCTACGGGATGCTGCAGTGAGGAATTTTCCGCAATGGGCGAAAGCCTGACGGAGCG  
ACGCCGTGTGGGTGATGAAGGTTTTTCGGATCTTAAAGCCCTGTCAGCGAGAACGATATTG  
ACGGTACTCGCAGAGGAAGCCCCGGCTAACTACGTGCCAGCAGCCGCGGTAATACGTAGG  
GGGCGAACGTTGTCCGGAATTATTGGGCGTAAAGCGCATGTAGGCGGTGAGGTAAGTCAG  
GTGTCAAATCCTTTTCGCTCAACGAAGGGCCGCACTTGATACTGCTTGGCTAGAGAGATGT  
AGAGGAAAGCGGAACTTCCGGTGTAGCGGTGAAATGCGTAGATATCGGAAGGAACACCAG  
TGGCGAAGGCGGCTTTCTGGTCATTTTCTGACGCTGAGATGCGAAAGCAAGGGGAGCAAA  
CGGGATTAGAGACCCGGGTAGTCC

>Otu12700

CCAGCCTACGGGTGGCAGCAGTCAAGAATTTTCCTCAATGGCCGAAAGGCTGAAGGAGCG  
ACGCCGCGTGTAGGATGAAGGTCTTCGGATTGTAAACTACTTTTATAGGGGACGAACTAG  
TGACGGTACCCTAAGAATAAGAGGTTGCTAACTCTGTGCCAGCAGCAGCGGTAATACAGA

GACCTCAAGCGTTATCCGGATTTATTGGGCGTAAAGCGTCCGCAGATGGTTTGGCGGGTG  
AGGAGTTAAAAATCCATAGCTTAACTATGGAACTGCTTCTCAAACCTACCAAACCTCGAGGGT  
GGGAGAGGTAAGCGGAATTCTCGGTGTAGTCGTAATAAGCGCTGATATCGAGAAGAACAC  
CAAATGCGAAGGCAGCTTACTGGAACACTCCTGACATTGAGGGACGAAAGCGTGGGGAGC  
AAACAGGATTAGAGACCCTTGTAGTCC

>Otu12701

CCAGCCTACGGGGCGCTCCAGTGGGGAATATTGGACAATGGGGGAAACCCTGATCCAGCG  
ACGCCGCGTGTGTGAAGAAGGCCTTCGGGTGTAAAGCACTTTTGTCCGGAAAGAAATCC  
CTGGTCCTAATATGGCCGGGGGATGACGGTACCGGAAGAATAAGCACCGGCTAACTACGT  
GCCAGCAGCCGCGGTAATACGTAGGGTGCAAGCGTTAATCGGAATTACTGGGCGTAAAGC  
GTGCGCAGGCGGTGATGTAAGACCGATGTGAAATCCCCGGGCTCAACCTGGGAACTGCAT  
TGGTGACTGCATCGCTTGAGTATGGCAGAGGGGGGTAGAATTCACGTGTAGCAGTGAAA  
TGCGTAGAGATGTGGAGGAATACCGATGGCGAAGGCAGCCCCCTGGGTCAATACTGACGC  
TCATGCACGAAAGCGTGGGGAGCAAACAGGATTAGAAACCCCCGTAGTCC

>Otu12702

CCAGCCTATGGGAGGCACCAGTCGAGAATTTTTTCAACAATGGGGGAAACCCTGATGGAGCG  
ACGCCGCGTGGGGGATGACTGGCTTCGGCCCGTAAACCCCTGTCATTTGTGAACAAACCT  
ATCCACCTAACACGTGGAGAGTTGATAGTAACGGAAGAGGAAGGGACGGCTAACTCTGTG  
CCAGCAGCCGCGGTAATACAGAGGTCCCAAGCGTTGTTTCGATTCACTGGGCGTAAAGGG  
TGCGTAGGTGGCCAGGTAAGTTTGATGTGAAATCTCGAAGCTTAACTTCGAAACTGCATT  
GAATACTATTTGGCTGGAGGGTTCGAGGGGGGACTGGAATTCTCGGTGTAGCAGTGAAAT  
GCGTAGATATCGAGAGGAACACCAGTGGCGAAGGCAGTCCCTGGACGACTCCTGACACT  
GAGGCACGAAAGCTAGGGGAGCAAACAGGATTAGAGACCCTCGTAGTCC

>Otu12708

CCAGCCTACGGGGGGCAGCAGTGGGGAATTTTTCGCAATGGGGGAAACCCTGACGCAGCA  
ACGCCGCGTGGAGGATGAAGCCCCCTTGGGGTGTAACCTCCTTTTCGATCGGGACGATAATG  
ACGGTACCGGAAGAAGAAGCCCCGGCTAACTTCGTGCCAGCAGCCGCGGTAATACGAGGG  
GGGCAAGCGTTGTTTCGGAATTATTGGGCGTAAAGAGCACGTAGGAGGTTTCGCGCGTCTT  
TTGTTAAAGCCCAGGGCCTAACCCCTGGAAGTGCAGGAGATACGGCAGGAACTAGAGGAGGT  
TAGAGGTGCATGGAACCTCACGGTGTAGGGGTGAAATCCGTTGATATCGTGGGGAACACCA  
AAGGCGAAGGCAGTGCCTGGGACCTTCCTGACTCTGAGATGCGAAAGCGTGGGGAGCAA  
AAAGGATTAGAAACCCCCGTAGTCC

>Otu12709

CCAGCCTATGGGTGGCAGCAGGCGAGAATATTCCGCAATGGACGCAAGTCTGACGGAGCG  
ACGCCGCGTGATGGATGGAGTGCTTCGGTACGTAAACATCTTTTATCGGGGAAGAACTAA  
TTGACGGTACCCGATGAATAAGGACCTCCTAACTCTGTGCCAGCAGGAGCGGTAATACAG  
AGGGACCGAGCGTTACCCGGAATCACTGGGCGTAAAGGGTGTCCAGGCGGCCTTGTTAGT  
CTCGCGTAAAATCTGTGGGCTCAACCTACAGCGCGCGCGGAAACGGCAAGGCTCGAGGG  
CGCGAGAGATAGAGGGAACCTCATGGTGGAGGGGTGAAATCCGTTGATATCATGGGGAACA  
CCAAAGGCGAAGGCAGTCTATTGGCGCGTTTCCTGACGCTCACACACGAAAGCCAGGGTAG  
CGAACGGGATTAGAGACCCTCGTAGTCC

>Otu12715

CCAGCCTACGGGGGGGCTCCAGTGGGGAATTTTGGACAATGGGGGAAACCCTGATCCAGCA  
ACTCTGCGTGAGGGACGAAGCCCTTCGGGGTGTAACCTCTTTTATCTGGGACGAACGCC  
AGCAATGGTTTGACGGTACCAGGTGAATAAGCAACGGCTAACTACGTGCCAGCAGCCGCG  
GTAAGACGTAGGTTGCAAGCGTTATTTCGGAATTACTAGGCGTAAAGCGAGTGTAGGCGGG  
TGCTTAAGTCCGTCGTGAAATCTCCTGGCTCAACTGGGAGGGGTGATGGATACTGGGCG  
TCTTGAGTGGAGTAGGGGGCAGTGGAATTCCTGGTGTAGCGGTGAAATGCGTAGATATCG  
GGAGGAACACCTATGGCGAAAGCAGCTGCCTGGGCTCTTACTGACGCTGAGGCTCGAAAG  
CTAGGGGAGCAAACAGGATTAGATACCCCCGTAGTCC

>Otu12718

CCAGCCTATGGGGTGCAGCAGTAACGAATCTTCCGCAATGCACGAAAGTGTGACGGAGCG  
ACGCCGCGTGTGGGACGAAGTTCTTCGGAATGTAAACCACTGTCAGGGGTTAGAAAGTTC  
TGATCAACCCAGAGGAAGGCACGGCTAACTCTGTGCCAGCAGCCGCGGTAATACAGAGG  
TGCCAAGCGTTAGGCGGAATCACTGGGCTTAAAGCGTGTGTAGGCGGTCCTTTTAGTACC  
TTGTGAAATCCCATGGCTCAACCATGGAACCTGCTTGGTATACTGGGAGACTTGAGCCACT  
TAGGGGTGAGCGGAACAAATGGTGGAGCGGTGAAATGCGTAGATATCATTTGGAACGCCG  
ATGGTGAACACAGCTGACTGGGAGTGTGCTGACGCTGAGACACGAAAGCCAGGGTAGCGA

ACGGGATTAGAAACCCCTCGTAGTCC

>Otu12731

CCAGCCTATGGGGGGCAGCAGTAGGGAATTTTCCACAATGGACGAAAGTCTGATGGAGCA  
ACGCCGCGTGACAGGATGAAGGCCTTAGGGTTGTAAACTGCTTTTCTCTGTGACGATTATG  
ACGGTAGCAGAGGAATAAGGATCGGCTAACTCCGTGCCAGCAGCCGCGGTCATACGGAGG  
ATCCAAGCGTTATCCGGAATTACTGGGCGTAAAGAGTTGCGTAGGTGGCATAGTAAGCAA  
GTAATGAAATCGTGTGGCTCAACCATGCTCACATTATTTGAACTGCTAAGCTAGAGAACG  
GGAGAGGTAGATGGAATTCCCAGTGTAGGAGTGAAATCCGTAGATATTGGGAGGAACACC  
GATGGCGTAAGCAGTCTACTGGCCTGTTTCTGACACTAAGGCACGAAAGCGTGGGGAGCA  
AACGGGATTAGAAACCCGGGTAGTCC

>Otu12738

CCAGCCTACGGGGGCGCAGCAGTGGGGAATCTTGCGCAATGGGCGAAAGCCTGACGCAGCA  
ACGCCGCGTGAGGGATGAAGGCCTTCGGGTGTAAACCTCTTTCAAGCAGGGACGATTGT  
GACGGTACCTGCAGAAGAAGCTCCGGCCAACTACGTGCCAGCAGCCGCGGTAATACGTAG  
GGAGCGAGCGTTGTCCGGAATCATTGGGCGTAAAGAGCTCGTAGGCGGCTCGGTAAGTCG  
GATGTGAAACCTCCAGGCTCAACCTGGAGTCGCCATCCGATACTGCCGTGGCTAGAGTCC  
GGTAGGGGGCCACGGAACCTCCTGGTGTAGCGGTGAAATGCGCAGATATCAGGAAGAACAC  
CGGTGGCGAAGGCGGCCAACTGGACCGACATTGACGCTGAGGCGCGAAAGCGTGGGGAGC  
AAACAGGATTAGATACCCCTCGTAGTCC

>Otu12750

CCAGCCTATGGGGTGCACCAGTGGGGAATCTTGCGCAATGGACGAAAGTCTGACGCAGCC  
ACGCCGCGTGAGTGAAGAAGGCCTTCGGGTGTAAAGCTCTGTCTGGAGGGGACAAAAACC  
TCTTAGGTTAATAGCCTAGGAGCTTGATGGTACCCTTAAAGGAAGCACC GGCTAACTTCG  
TGCCAGCAGCCGCGGTAATACGAAGGGTGCAAGCGTTGCTCGGAATTATTGGGCGTAAAG  
GGTAGGTAGGTGGTGACAAAAGTCTAGGGTGAAATCCCTGAGCTCAACTCAGGACGTGCC  
TTGGAACCTTTGTCACTAGAGTGCTAGAGAGGTTTCGCAGGATTCCCGGTGTAGCGGTGAA  
ATGCGTAGAGATCGGGAGGAATACCAGAGGCGAAGGCGGCGAACTGGATAGCAACTGACA  
CTAAACTACGAAAGCGTGGGGAGCAAACAGGATTAGAAACCCCGTAGTCC

>Otu12763

CCAGCCTATGGGGGGCTCCAGTGGGGAATTTTCCACAATGGGCGAAAGCCTGATGGAGCA  
ACGCCGCGTGTTGATGAAGTCTTCGGATCGTAAAGCACTTTCGACCGGGACAAAAACG  
CCATGGCTAACATCCATGGAAGTACGGTACCGGGAGAAGAAGCACC GGCTAACTCTGTG  
CCAGCAGCCGCGGTAATACAGAGGGTGCAAGCGTTGTTTCGGAATTATTGGGCGTAAAGCG  
CGTGTAGGCTGCTTGATAAGTCACATGTGAAATCCCTCGGCTTAACCGAGGAAGTGCGTG  
TGAAACTGTTCGAGCTTGAGTACCGGAGAGGATGGCGGAATTCTGCAAGTAGAGGTGAAAT  
TCGTAGATATGCAGAGGAACACCGGTGGCGAAGGCGGCCATCTGGACGGTAACTGACGCT  
GAGACGCGAAAGCGTGGGGAGCAAACAGGATTAGAGACCCCGGTAGTCC

>Otu12765

CCAGCCTACGGGTGGCTCCAGTCGAGAATCTTCCACAATGGGCGCAAGCCTGATGGAGCG  
ACGCCGCGTGTTGATGAAGTCTTCGGGACGTAAAAACCTTTTATGAGGGAGGAAGTTA  
TTGACGTTACCTCATGAATAAGGGGCTCCTAACTCTGTGCCAGCAGGAGCGGTAATACAG  
AGGCCCAAGCATTATCCGGAATCACTGGGCGTAAAGGGTGTGTAGGCGGTGCGGTTAGT  
CGTTTGTGAAAGACCTTGGGCCCCAAGGAGGACGCAACCGAAACGGCGCGACTTCGAG  
GACGCGAGAGGTCTGGGGAACCTCATGGTGTAGGGGTGAAATCCGTTGATATCATGGGGAA  
CACCAAATGCGAAGGCACCAGACTGGCGCGCTCCTGACGCTGAAACACGAAAGCGTGGGA  
ATCGAACGGGATTAGATACCCGCGTAGTCC

>Otu12770

CCAGCCTACGGGGGGCAGCAGCCGAGAATATTCGACAATGGACGAAAGTCTGATCGAGCG  
ACGCCGCGTGCGGGATGACGTGCTTCGGCATGTAAACCGCTTTTGCCGGGGAAAAAGTTT  
ATTGATGGTACCCGGCGAATAAGGAGTTGCTAAACTCGTGCCAGCAGCAGCGGTAATACG  
AGTGCTCCAAGCGTTATCCGGAATTATTGGGCGTAAAGGGTGTGTAGGCGGTGACGTTAG  
TCCTCTGTTAAATCTTCGGCTTAACCGGGGGTCTGCGGAGGAGACGGCATCACTTGAGG  
ATGCGAGAGGTATGCGGAACCTCATGGTGTAGGGGTGAAATCCGTTGATATCATGGGGAAC  
ACCAAAGCGAAGGCAGCATACTGGCGCACTCCTGACGCTGAAACACGAAAGCGTGGGTA  
GCGAATGGGATTAGAAACCCGCGTAGTCC

>Otu12779

CCAGCCTATGGGAGGCAGCAGTGGGGAATTTTGCAGCAATGGGCGAAAGCCTGACGCAGCG  
ACGCCGCGTGAGAGGATGAAGGTTCTAGGATTGTAAACTCCTGTTAAGTGGGAAGAAAAAC

CTGTTCCCTAATATGAACAGGGCATGACTGTACCATTAGAGAAAGCACCGGCTAACTTCGT  
GCCAGCAGCCGCGGTAATACGAGGGGTGCAAGCGTTATTTCGGAATAATTGGGCGTAAAGG  
GTGTGTAGACGGCTTATTAAGTCAGTTGTTAAATCTTCCGGCCTAACTGGGAGCTCGCGA  
TTGAAACTGGTATTGCTAGAGGGTGGAAGAGAGAAGTGGAATTCTCGGAGTAGCGGTAAA  
ATGCGTAGATCTCGAGAGGAACACCGATGGCGAAGGCAGCTTCTTGGTCCATTTCTGACG  
TTGAAACACGAAAGCGTGGGGAGCAAACAGGATTAGAAACCCCTGTAGTCC

>Otu12782

CCAGCCTATGGGGGGCAGCAGTGGGGAATCTTGCACAATGGAGGAAACTCTGATGCAGCG  
ACGCCGCGTGAGCGATAAAGCCCCCTCGGGGTGTAAAGCTCTTTCGGCAGGGAAGATAATG  
ACGGTACCTGCAGAAGCAGCTGCGGCTAACTACGTGCCGGCAGCCGCGGTAATACGTAGG  
CAGCAAGCGTTGTTTCGGAGTTACTGGGCGTAAAGGGTGCGTAGGCGGCTTTTTTAAGTTTG  
GTGTGAAATCTCCCGGCTCAACTGGGAGGGTGCGCCGAATACTGAGAGGCTAGAGTGTGG  
GAGAGGAAAGTGGAATTCCTGGTGTAGCGGTGAAATGCGTAGATATCAGGAAGAACACTA  
GTGGCGTAGGCGACTTACTGGGCCATAACTGACGCTGAGGAACGAAAGCCAGGGGAGCAA  
ATGGGATTAGAGACCCCTGTAGTCC

>Otu12784

CCAGCCTATGGGGGGCACCAGTGGGGAATATTGCGCAATGGCCGAAAGGCTGACGCAGCG  
ACGCCGCGTGTTGGGTGACGCCCTTCGGGGTGTAAACCACTGTTGCCCGGGACGAACGGG  
CGGATTATTCCGCCGTGACGGTACCGGGTGAGGAAGCACCGGCTAACTCCGTGCCAGCAG  
CCGCGGTAATACGGAGGGTGCGAGCGTTGTCCGGAATCACTGGGCGTAAAGGGCGCGTAG  
GCGGCTTGTAAGGGGGCGGTGAAAGCCCCGGGGCTCAACCCGGGTCTGCCGGACCGACT  
GCCGAGCTGGAGCACACTAGAGGCGAGTGGAATTCCGGGTGTAGCGGTGGAATGCGTAGA  
GATCCGGAAGAACACCGGTGGCGAAGGCGGCTCGCTGGGGTGTGGCTGACGCTGAGGCGC  
GACAGCGTGGGGAGCAAACAGGATTAGAAACCCCTGTAGTCC

>Otu12795

CCAGCCTACGGGTTGCAGCAGTCGAGGATCTTCCGCAATGGGCGCAAAGCCTGACCGAGCG  
ACGCCGCGTGTTGGGATGAAGGCCCTTGGGTTGTAAACCACTGTCAGAGGGGATGAAGTGC  
CGGGAGGCTATCCTTCCGGCTTGACATAGCCTCAGAGGAAGCACGGGCTAAGTTTCGTGCC  
AGCAGCCGCGGTAATACGAACTGTGCAAACGTTATTTCGGAATCACTGGGCTTAAAGGGTG  
CGTAGGCGGCTGTCTAAGTAGGGTGTGAAAGCCCCCGGCTCAACCGGGGAATTGCGCCCT  
AACTGGATGGCTGGAGTGAGGCAGGGGTGTGTGGAACCTCCGGTGGAGCGGTGAAATGT  
GTTGATATCGGAAGGAACGCCGGTGGCGAAAGCGACACACTGGGTCTCAACTGACGCTGA  
GGCACGAAAGCCAGGGGAGCAAACGGGATTAGAAACCCGAGTAGTCC

>Otu12803

CCAGCCTACGGGAGGCACCAGTCGAGAATCTTCCGCAATGGGCGAAAGCCTGATCGAGCG  
ACACCGCGTGCAAGATGAAGGCCTTCGGGTGCTAAACTGCGGTAGATAAGTGACAATGCA  
AATGAGTGCTTATCGGAAATAGGTGGGTAACCTACGTGCCAGCACCAGCGGTAAAACGTAG  
ACCTCAAGCGTTATCCGGATTATTGGGCGTAAAGCGCATGTGGGTGGTTTCGCGCGTCT  
TCTGCTAAAGCCCACCGCCCAACGGTGGAAAGTGAGGAGATACGGCGAGACTAGAGGAGG  
TTAGAGGTGCATAGAACGCACGGTGTAGGGGTGAAATCCGTTGATATCGTGCGGAATACC  
AAAGGCGAAGGCATTGCACTGGGACCTTCCTGACATTGAGATGCGAAAGCGTGGGGAGCA  
AAAAGGATTAGATACCCGCGTAGTCC

>Otu12806

CCAGCCTACGGGAGGCACCAGTGGGGAATATTGGACAATGGGGGAAACCCTGATCCAGCG  
ATGCCGCGTGTTGAAGAAGGCCTGAGGGTTGTAAAGCACTTTCAGTGGGGAGGATAGTT  
TGCAGGTTAAGAGCTGGCAAGCGGGACGTTACCCACAGAAGAAGCACCGGCTAACTCCGT  
GCCAGCAGCCGCGGTAATACGGAGGGCGCGAGCGTTAATCGGAATTACTGGGCGTAAAGG  
GTGCGCAGGTGGTTTGGCAAGATATCTGTGAAATCCCCGGGCTTAACCTGGGAGCGTCAG  
ATAAGACTGCGAGACTCGAGTACAGGAGAGGGCAGTGGAATTTCCGGTGTAGCGGTGAAA  
TGCGTAAAGATCGGAAGGAACACCGGTGGCGAAGGCGGCTGCCTGGCCTGATACTGACAC  
TGAGGCACGAAAGCGTGGGGAGCAAACAGGATTAGAGACCCGAGTAGTCC

>Otu12807

CCAGCCTATGGGGTGCTGCAGTGGGGAATCTTGCAGCAATGGGCGAAAGCCTGACGCAGCG  
ACGCCGCGTGGGGGATGAAGCTTCTCGGAGTGTAACCCCTTTTCGACCCGGACGAAACGC  
CCGCAAGGGCTTGACGGTACGGGTATAAGAAGCCCCGGCTAACTACGTGCCAGCAGCCGC  
GGTAATACGTAGGGGGCCAGCGTTGCTCGGAATTACTGGGCGTAAAGGGTTTCGTAGGCGG  
TGCGGCAAGTCGGGAGTGAAATCTCTGGGCTCAACTCAGAGGCTGCTTCCGAAACTGCCG  
CGTAGAGTGCGGGAGGGGCCAGTGGAATTGCGGGTGTAGCGGTGAAATGCGTAGATATC

CGTAGGAACATCCGAGGCGAAAGCGGCTCGCTGGATCACAACCTGACGCTGAGGGACGAAA  
GCTAGGGGAGCAAACAGGATTAGATACCCCTAGTAGTCC  
>Otu12815  
CCAGCCTATGGGGCGCACCCAGTCGAGAATCTTCCGCAATGGACGAAAGTCTGACGGAGCG  
ACGCCGCGTGATTGATGAAGCTTTTTCGGAGTGTAAGATCTTTTATGAGGGAAGAAGTTT  
ATTGACGGTACCTCATGAATAAGGGGCTCCTAATCTCGTGCCAGCAGGAGCGGTAATACG  
AGAGCCCCGAGCGTTATCCGGAATTATTGGGCGTAAAGGGTGCGTAGGTGGCACTGTTAG  
TCGTTTGTCAAATCTTCCCGCTTAACGAGAAATCCGCGGACGAAACGGCAGAGCTAGAGA  
GTGTGAGGGGTGAATGGAACCTCATGGTGTAGGGGTGAAATCCGTTGATATCATGGGGAAC  
ACCAAATGCGAAGGCAGTACACTGGCGCATATTTGACACTGAAGCACGAAAGCGTGGGTA  
GCGAATGGGATTAGATACCCCAGTAGTCC  
>Otu12820  
CCAGCCTACGGGGTGACCAGTCGAGAATCTTCCGCAATGGGCGAAAGCCTGACGGAGCG  
ACGCCGCGTGACTGATGAAGTCCTTCGGGACGTAAAGGTCTTTTGTGAGGTAGAAAGTAA  
TTGATCGCCTCAAGAATAAGGGGTTGCTAAACTCGTGCCAGCAGCAGCGGTAATACGAGT  
GCCCCAAGCGTTATCCGGAATTATTGGGCGTAAAGGGTGCGTAGGCGGTTATATTAGTCT  
TTTGTAAAGCTTCCGGCTCAACCGGAAAAATGCAATTGATACGGTATACTAGAGGGTG  
TGAGAGGTGTACAGAATCATAGTGTAGGGGTGAAATCCGTTGATATTATGGGGAATACC  
AAAAGCGAAGGCAGTACACTGGCACATTCTGACGTTGAGGCACGAAAGCGTGGGTAGCG  
AATGGGATTAGATACCCCTAGTAGTCC  
>Otu12821  
CTAGCCTATGGGTGGCTGCAGTGGGGAATATTGGACAATGAGCGAAAGCTTGATCCAGCA  
ATACCTCATGGAGGACGAAGGTTTATTGATTGTAAACTCCTTTTAGTAAAGAAAATTGTG  
ATTATATTTACAGAATAAGCCCCGGCTAATTCGCGTCCAGCAGCCGCGGTAATACGGGAG  
GGGCTAGTGTTATTCGGAATGACTGGGCGTAAAGGGCATCTAGGTGGATTTTTACGTTTT  
TTAAGAAATCTCATGGCTTAACTAATGAAACTTAAAAAAACGATTAATCTTGAGTATGG  
CAGAGGGTAACAGAATTCTTAGTGTAAACAGCAATATGTGTGAATATTAAGAGGACTGCCA  
AAGCGAAGGCGGTTATCTGGACCATTACTGACGCTGAAATGCGAAAGCATGGGGATCAAA  
TCGGATTAGATACCCGCGTAGTCC  
>Otu12824  
CCAGCCTACGGGATGCTGCAGTCGAGAATCTTTCGCAATGGGCGAAAGCCTGACGAAGCG  
ACGCTGTGTGGACGATGAAGGCCTTCGGGTGTAAAGTCCTTTTCGCGTAAGAACAAGAGA  
GACCTTCTAACACAAGGTTGATTTGAGGGTACTACGTAAAGAAGCACCGGCTAACTCCGT  
GCCAGCAGCTGCGGTAATACGGAGGGTGCAAGCATTAAATCGGATTTACTGGGCGTAAAGG  
GCGCGTAGGCGGGTCTACAAGTCAAATGTGAAATTCCGGAGCTCAACTTCGGAGCGGCAT  
TTGAAACTGTAGGTCTATAGAGGGATGGCGGAGAAAACGGAATTCACGTGTAGCGGTGA  
AATGCGTAGATATGTGGAAGAACACCTGTGGCGAAAGCGGTTTTCTAGCTATTTCTGAC  
GCTGAGGCGCGAGAGCATGGGGAGCAAACAGGATTAGATACCCCAGTAGTCC  
>Otu12828  
CCAGCCTATGGGATGCACCAGACGAGAATATTCGACAATGGGCGAAAGCCTGATCGAGCG  
ACGCTGCGTGAGGATGAAGTTCTTCGGGACGTAAACTCCTTTTGCCAGGGAAGAAAGTTA  
TTGATTGTACCTGGAGAATAAGAAGTTGCTAAACTCGTGACGAGCAGCAGCGGTAATACGAG  
TGCTTCGAGCGTTATCCGGAATCATTGGGCGTAAAGGGTGTGTAGGCGGTTTTGTAGTC  
TCGTGTAAATCTCCCGGCTCAACCGGGAACCTCGCACGGGAAACGGCAAGACTTAGAGGA  
CGGAAGAGGTCTCTGGAACCTCATGGTGTAGCGGCGAAATGCGTTGATATCATGGGGAACA  
CCGAAAGCGAAGGCAAGAGACTGGTCCGCTCCTGACGCTGAAACACGAAAGCGTGGGTCTG  
CGAATGGGATTAGAAACCCGTGTAGTCC  
>Otu12839  
CCAGCCTACGGGGTGCTGCAGTACGATCTCAACATAGTCTTTTTTTCGTGTTGCTGACCAC  
ACCAACTGTAACTGCGGTGCCGACCGAGAGCATCAGCGGCTCCGAGTGCTTCAATGGCTC  
AATAATGAGCTCACTTGTGTCTCCGACCAACCGTTCCATAAGGGTAACACTGCACCGGAT  
CTTATCCCAGACCGGGGGAAGTTTCCCTCATGACCAAGTACCTGGCCGGCGAGTGCATC  
ACTCTTGGTAAGGGCCGGGTCCAGTTTTGTCCCTACACCCAGCAATCCCCGGGGGTTC  
CTCGTCAACCTGCTTGGACCCGGCATTAATTGAGGTTATCGTCGTGATAATGGGGATCCA  
TTTGATCCTGTTCTCAATCTGTGTCTGCCTGCCGGGACGGATCTCAATTTTTTCGTCTGC  
TCGGAGGATGCCCCGATTAGATACCCCCGTAGTCC  
>Otu12848  
CCAGCCTATGGGACGCAGCAGTCGAGAATTTTTCTCAATGGGCGAAAGCCTGAAGGAGCG

ACGCCGCGTGGGGGATGAAGGCCTTCGGGTGTAACTCCTTTTGTAGGGGAAGATAATG  
ACGGTACCCTGCGAATAAGCCACGGCTAACTCTGTGCCAGCAGCCGCGGTAAGACAGAGG  
AGGCGAGCGTTGTTTCGGAATTACTGGGCTTAAAGGGCGCGTAGGCCGGTGATATAAGTCTG  
GGGTGGAAGCCCATAGCTTAACTATGGGACTGCCCTGGAACTGTATTGCTTGAGTCGGA  
CAGGGGAAGGCGGAATTCAGGTGTAGCGGTGAAATGCGTAGATATCTGGAGGAAGGCCT  
GTGGTGAAGACGGCCTTCTGGGTCTTGACTGACGCTGAGGCGCGAAAGCGTGGGTAGCAA  
ACAGGATTAGATACCCAGTAGTCC

>Otu12855

CCAGCCTACGGGAGGCTGCAGTGGGGAATATTGCACAATGGGGGAAACCCTGACGCAGCA  
ACGCCGCGTGAGTGAGGAAGGTTTTTCGGATCGTAAAGCTCTGTGAGCGGGAAGAAATGT  
GTGGTGGCTAATATCCATCATGCTTGACGGTACCGCTAAAGGAAGCACCGGCCAACTCCG  
TGCCAGCAGCCGCGGTAATACGGAGGGTGCAGCGTTGTTCGGAATTATTGGGCGTAAAG  
CGCGTGTAGGCGGTTTTTTTAAGTCTGATGTGAAAGCCCTGGGCTCAACCCGGAAGTGCA  
TTGGAACTGGGAGACTTGAATACGGGAGAGGGTAGTGGAATTCCTGGTGTAGGAGTGAA  
ATCCGTAGATATCAGGAGGAACACCGGTGGCGAAGGCGGCTACCTGGACCGATATTGACG  
CTGAGACGCGAAAGCGTGGGGAGCAAACAGGATTAGATACCCAGTAGTCC

>Otu12857

CCAGCCTATGGGACGCACCAGTCAGGAATATTCCTCAATGGCCGAAAGGCTGAAGGAGCG  
ACGCCGCGTGACTGATGAAGCTCTTCGGAGCGTAAAGGTCTTTTATTAGGGACGAATTC  
GACGGTACCTAATGAATAAGGGGCTGCTAACCTCGTGCCAGCAGCAGCGGTAATACGAGG  
GCCCCAAGCATTATCCGGATTTATTGGGCGTAAAGCGTCCGCAGACGGTTTGTGCGATCT  
CCTGTTAAATCCTCGGGCTTAACCCGGGGGCCGCGGAGAGATGGATAAACTAGAGACTG  
GAAGAGGTAAGCGGAATTGCTGGTGTAGGGGTAAATCCGTTAATATCAGCAAGAACATT  
AAATGCGTAGGCAGCTTACTAGGACAGTTCTGACGTTGAGGGACGAAAGCGTGGGTAGCG  
AATGGGATTAGAGACCCCGTAGTCC

>Otu12862

CCAGCCTATGGGACGCAGCAGTGGGGAATTTTGCGCAATGGGGGAAACCCTGACGCAGCA  
ACGCCGCGTGAGGATGAAGTACTTCGGTACGTAAACTCCTTTTCGATCGGGACGATAATG  
ACGGTACCCGGAGAAGAAGCCCCGGCTAACTTCGTGCCAGCAGCTGCGGTAATACGAAGG  
GGGCTAGCGTTGCTCGGAATTACTGGGCGTAAAGGGCGCGTAGGCCGGGTCGTTAAGTTGG  
GGGTGAAAGCCCCGGGGCTCAACCTCGGAATTGCCTTCAATACTGGCGACCTTGAGTATGG  
GAGAGGTGAGTGGAATCCGAGTGTAGAGGTGAAATTCGTAGATATTTCGGAAGAACACCA  
GTGGCGAAGGCGACTCACTGGCCATTACTGACGCTGAGGCGCGAAAGCGTGGGGAGCAA  
ACAGGATTAGATACCCGTGTAGTCC

>Otu12871

CCAGCCTATGGGTGGCAGCAGCAGGTAGACCGGAGCGAGATAGATCATTGCCAAAAGTCC  
GTTACCCACGAGGCCGCCTCGCCCAGAGGAGCCAGCGCTACTCAGTTTAAACAGTGAAAA  
CGCGAAAATAGCGATGAACGGAAAGAGCCAAAAAAGGCTGTGGAATGCGCGAGAATCGG  
GTAGACGGGAAGATAAATTACGGTGACTGCTGCCTGCGCTATCATATGACGCAGTTCCCC  
CACGGACAGAAGAACGGGCAGCAGCAGCAAAACCAAGTCGTGCGGGTAGACGTGATAGCC  
CGCCAGGATCAAGCATACCAGTGCAAAAGAAAACGCTCGCTCCAGCGAGCGAGCGCTTTT  
CCACTGCCTCCAAGCGAGCAGGATTAGATACCCTTGTAGTCC

>Otu12878

CCAGCCTATGGGAGGCAGCAGTCGAGAATCTTCCACAATGGACGAAAGTCTGATGGAGCG  
ACGCCGCGTGACTGATGAAATCCTTCGGGATGTAAAGGTCTTTTGTGAGGGACGAAGTTT  
ATTGACGGTACCTCAAGAATAAAGGGTTGCTAAACTCGTGCCAGCAGCAGCGGTAATACG  
AGTGCCCAAAACGTTATCCGGAATTATTGGGCGTAAAGGGTGTGTAGGTGGTTGCGTTAG  
TCTTCTGTTAAATCTTCGGCTTAACCGGGGGCATGCGGAGGAAACGGCGGACTAGAGG  
ATGCGAGAGGCACAGGGAACCTCATGGAGTAGGGGTGAAATCCGTTGATATCATGGGGAAC  
ACCGAAAGCGAAGGCACTGTGCTGGCGCATTCCTGACGCTGAGACACGAAAGCGTAGGTA  
GCGAATGGGATTAGAAACCCGTGTAGTCC

>Otu12885

CCAGCCTATGGGGCGCAGCAGTGGGGAATATTGGACAATGGGCGAAAGCCTGATCCAGCA  
ATGCCGCGTGTGTGATGAAGGTCTTCGGATCGTAAAGCACTGTGCGAGGGACGAATAAG  
GGTCGGGCTAACATCCCGGTCCGATGACGGTACCTCGAGAGGAAGCACCGGCTAACTCTG  
TGCCAGCAGCCGCGGTAATACAGAGGGTGAAGCGTTGTTCGGAATTATTGGGCGTAAAG  
CGCGTGTAGGCGGCTTAGCAAGTCAGGTGTGAAAGCCCTCGGCTTAACCGAGGAAGTGCG  
CCTGAACTATTGAGCTTGAGTACCGGAGAGGGCGGCGGAATTCCCGGTGTAGAGGTGAA

ATTCGTAGATATCGGGAGGAACACCAGCGGCGAAGGCGGCCCTGGACGGTCACTGACG  
CTGAGACGCGAAAGCGTGGGTAGCAAACAGGATTAGATACCCGAGTAGTCC  
>Otu12892  
CCAGCCTACGGGGCGCACCCAGTCGAGAATCTTCCGCAATGGACGAAAGTCTGACGGAGCG  
ACGCCGCGTGGAGGATGAAGTTCTTCGGAATGTAACTCCTTTTGCCAGGGAAAAAGTTA  
TTGATTGTACCTGGAGAATAAGAAGTTGCTAAACTCGTGCCAGCAGCAGCGGTAATACGA  
GTGCTTCAAGCGTTATCCGGAATCATTGGGCGTAAAGGGTGTGTAGGTGGTTTTGTAGT  
CTCACGTAAAATCTCTCGGCTTAACCGAGAATCTGCGCGGGAAACGGCAAGACTCGAGGA  
CGGAAGAGGTTTCTGGAACCATGGTGTAGCGGTGAAATGCGTTGATATCATGGGGAACA  
CCGAAAGCGAAGGCAAGAACTGGTCCGCTCCTGACACTGAAACACGAAAGCGTGGGTCC  
CGAATGGGATTAGATACCCGTGTAGTCC  
>Otu12902  
CCAGCCTATGGGGGGCTCCAGTGAGGAATATTGGACAATGGGCGCAAGCCTGATCCAGCC  
ATGCCGCGTGAGTGATGAAGGCCTTAGGGTTGTAAACTCCTTTTAGTGGGGAAAAATAATG  
ATGGTACCCACAGAAAAAGCTCCGGCTAACTTCGTGCCAGCAGCCGCGGTAATACGAAGG  
GAGCTAGCGTTACTCGGAATTACTGGGCGTAAAGCGCATGTAGGCGGAATTTCAAGTCAG  
GGGTGAAATCCCGGGGCTCAACCCCGGAATTGCCATTGAACTGTAATTCCTGAGATTGA  
CAGAGGATGGTGGAATTTCCAGTGTAGAGGTGAAATTCGTAGATATTGAAAGAACACCG  
GTGGCGAAGGCGACCATCTGGGTCAATACTGACGCTGAGATGCGAAAGCGTGGGGAGCAA  
ACGGGATTAGAGACCCCCGTAGTCC  
>Otu12912  
CCAGCCTATGGGATGCACCAGTAAGGAATATTGGACAATGGTGGCAACACTGATCCAGCC  
ATGCCGCGTGAGTGATGAAGGCGCTACGCGTTGTAACTGCTTTTGTACCAGAGAAAACC  
TATCTACGTGTAGATAGCTGATAGTATGGTAAGAATAAGCATCGGCTAACTTCGTGCCAG  
CAGCCGCGGTAATACGAAGGATGCAAGCGTTATCCGGATTTATTGGGTTTAAAGGGTGCG  
TAGGCGGCCCTGTAAGTCAGTGGTGAAATCTTTGGGCTTAACCCAAAAATTGCCATTGAT  
ACTGCAGGGCTTGAGTACAGTTGCTGTGGGCGGAATATGACATGTAGTGGTGAAATACAT  
AGAGATGTCATAGAACACCGATTGCGAAGGCAGCTCACAAAACCTGTAACCTGACGCTGAGG  
CTCGAAAGTGCGGGGATCAAACAGGATTAGATACCCGTGTAGTCC  
>Otu12914  
CCAGCCTATGGGACGCTCCAGTGGGGAATATTGCGCAATGGGCGAAAGCCTGACGCAGCG  
ACGCCGCGTGGGGGATGAAGGCCTTCGGGTGTAAACCCCTTTACCAGGAGCGGAAATCA  
GGCGGTACCTGGTGAATAAGCCACGGCTAACTACGTGCCAGCAGCCGCGGTAATACGTAG  
GTGGCAAGCGTTGTCCGGATTTATTGGGTTTAAAGGGTGCGTAGGCGGCCCTGTAAGTCA  
GTGGTGAAATACGGCAGCTCAACTGTGAGGTGCCATTGATACTGCAGGGCTTGAGTACA  
GACGAGGTAGGCGGAATTGACGGTGTAGCGGTGAAATGCTTAGATATCGTCAAGAACACC  
GATAGCGAAGGCAGCTTACTAGGCTGTAACCTGACGCTGAGGCACGAGAGTGTGGGGATCA  
AACAGGATTAGAAACCCTGGTAGTCC  
>Otu12923  
CCAGCCTACGGGGGGCACCCAGTGAGGAATATTGGACAATGAACGAAAGTTTGATCCAGCA  
ATGTCGCGTGAGTGATACTAATAAAATTAAAAATACAAATAGTATTTTTTAAGGCAGGTTA  
GATCCGTAAAACTCTTTCAACATTGATGAAAAAGACCGTATTTGTAGAAGAAGTCCCGAC  
TAACTTCGTGCCAGCAGTCGCGGTAAACCGGAGGGGGCAAGCGTTATTCACCTTGACTGG  
GCGTAAAGGGTATGTAGGTTGTTTTTTTATTTATATAATAAGTAATCCAAGCATAACTTTT  
GAAGTTATTTTTTATAAATTTAGACTAGAGGTAATAAGAAGTAAGTTACATTTTTTAAAGT  
AGGGGTGAAATCCTTAAATATTAAAAAGATAGCCGAATGGCGAAAGCTACTTACTATGAT  
TATCCTGACACTGAAATACGAAAGCATGGGGATCAAACAGGATTAGAAACCCGAGTAGTC  
C  
>Otu12924  
CCAGCCTACGGGTGGCTGCAGTCGAGAATTTTTTCACAATGGGGGAAACCCTGATGGAGCG  
ACGCCGCGTGGGGGATGAATGGCTTCGGCCCGTAAACCCCTGTCATTTGCGAACAAACGG  
CATTATTTAAAGATGATGTTTTGATAGTAGCGAAAGAGGAAGGGACGGCTAACTCTGTG  
CCAGCAGCCGCGGTAATACAGAGGTCCCAAGCGTTGTTTCGGATTCACTGGGCGTAAAGGG  
TGCGTAGGTGGTTCGGGTAAGTCTGATGTGAAATCTCGCAGCTCAACTGCGAAACTGCATT  
GGATACTATCCGGCTGGAGGGTCGGAGGGGGGACTGGAATTCTCGGTGTAGCAGTGAAAT  
GCGTAGATATCGAGAGGAGCACCCAGTGGCGAAGGCGAGTCCCTGGACGACTCCTGACGCT  
GAGGCACGAAAGCCAGGGGAGCAAACGGGATTAGAAACCCTAGTAGTCC  
>Otu12925



CCAGCCTATGGGTGGCAGCAGTAAGGGATTTTCGGCAATGGGCGAAAGCCTGACCGAGCA  
ACGCCGCGTGTGTGAAGACGGCCTTCGGGTGTAAAGCACTTTTCATGGGGACGAGAACG  
GACGGTACCTGTGGAAGAAGCCCCGGCTAACTACGTGCCAGCAGCCGCGTAATACGTAG  
GGGGCGAGCGTTGTCCGGAGTTATTGGGCGTAAAGCGCGTGCAGGCGGCCTGGAAGGTGC  
GGTGTGAAAGCTCCCGGCTCAACTGGGAGAGTGCCTCGCAGACCGCCAGGCTCGAGGGCT  
GGAGAGGAAGATGGAATTCCCGGTGTAGCGGTGGAATGCGTAGAGATCGGGAGGAACACC  
AGTGGCGAAGGCGGTCTTCTGGACAGCCCCTGACGCTCAAGCGCGAAAGCGAGGGGAGCG  
AACGGGATTAGAAACCCCTCGTAGTCC

>Otu12954

CCAGCCTACGGGTGGCAGCAGTCGAGAATTTTTCACAATGGGCGAAAGCCTGATGGAGCG  
ACGCCGCGTGGGGGATGAATGCCTTCGGGTGCTAAACTGCGGTAGATAGGTAAACAATGTA  
AATGAGTGCCTATCGGAAAGAGGTGGGTAACCTACGTGCCAGCACCAGCGGTAAAACGTAG  
ACCTCAAGCGTTATCCGGATTTATTGGGCGTAAAGCGCGTGTAGGTGGTTCGGTGCCTTT  
CTGGTTAAATCCCATTGCCTAACAATGGACCCGCCAGGAATACGGCCGGACTAGAGGAGG  
TTAGAGGTGCATAGAACGCACGGTGTAGGGGTGAAATCCGTTGATATCGTGCGGAATACC  
AAAGGCGAAGGCATTGCACTGGGGCCTTCCTGACACTGAGACGCGAAAGCGTGGGGAGCA  
AAAAGGATTAGAAACCCGCGTAGTCC

>Otu12962

CCAGCCTACGGGGGGCTGCAGTCGAGGATCTTCGGCAATGGGCGCAAGCCTGACCGAGCG  
ACGCCGCGTGTGCGATGAAGGCCTTCGGGTGTAAAGCACTGTGAGGGGGAGAAAAGCC  
CGCAAGGGTTTGATCTATCCCTGGAGGAAGCACGGGCTAAGTTCGTGCCAGCAGCCGCGG  
TAAGACGAACCGTGCAACGTTATTTCGGAATCACTGGGCTTAAAGGGCGCGTAGGCGGGT  
TCTCAAGTCAGGGGTGAAATCCTCCAGCTTAACCTGGAGAAGTGCTTTTGATACTGGGAAT  
CTCGAGTAAGGTAGGGGCATGTGGAACCTCCGGTGGAGCGGTGAAATGCGTAGATATCGG  
AAGGAACGCCGTGGCGAAAGCGACGTGCTGGACCTTTTCTGACGCTGAGAGACGAAAGC  
TAGGGGAGCAAAACAGGATTAGATACCCTAGTAGTCC

>Otu12963

CCAGCCTACGGGTGCTGCAGTGGGGAATTTTGGACAATGGGGGCAACCCTGATCCAGCC  
ATGCCGCGTGAGTGAAGAAGGCCTTCGGGTGTAAAGCTCTTTCGGCCGGGACGAAATCG  
CATGGGTGAATATCCTGTGTGGATGACGGTACCGGAAGAAGAAGCACCCGGCTAACTACGT  
GCCAGCAGCCGCGGTAACACGTAGGGTGCAGCGTTAATCGGAATTACTGGGCGTAAAGC  
GTGCGCAGGCGGTTTTGTAAAGCCAGATGTGAAATCCCCGGGCTCAACCTGGGAACCTGCAT  
TTGGGACTGCGAGGCTGGAGTACGGCAGAGGGGGGTAGAATTCCTGGTGTAGCAGTGAAA  
TGCGTAGATATCAGGAGGAATACCGATGGCGAAGGCAGCCCCCTGGGTGATACTGACGC  
TCATGCACGAAAGCGTGGGGAGCAAACAGGATTAGAAACCCGAGTAGTCC

>Otu12966

CCAGCCTATGGGTCGCACCAGTGGGGAATATTGGACAATGGGCGCAAGCCTGATCCAGCA  
ATGCCGCGTGAATGATGAAGGCCTTAGGGTGTAAAGTTCTTTTAGTGGAGAAGAAAATG  
ACGGTACCCACAGAAAAAGCTCCGGCTAACTCCGTGCCAGCAGCCGCGGTAATACGGAGG  
GAGCTAGCGTTTTTTCGGAATTACTGGGCGTAAAGAGCGCGTAGGCGGCTAGCTAAGTTGA  
AAGTGAAAGCCCCAAGGCTTAACCTTGAACTGCTTTCAAACTAGTTAGCTTGAGATCGG  
TAGGGGACAGTAGAATTCCTAGTGTAGAGGTGAAATTCTTAGATATTAGGAGGAATACCG  
GTGGCGAAAGCGACTGTCTGGACCGTTTTCTGACGCTAAGGCGCGAAAGCGTGGGGAGCAA  
ACAGGATTAGAGACCCCAGTAGTCC

>Otu12969

CCAGCCTACGGGGGGCACCAGCAACGAATCTTCCCCAATGGGCGAAAGCCTGAGGGAGCG  
ACGCCGCGTGTGGGATGAAGTACTTCGGTATGTAAACCACTGTTAGGGTTAGGAAAGCGA  
TGCGCACTAATAGTGCGCAAAGTTGATCTAACCCAGAGAAAGGGACGGCTAACTCTGTGC  
CAGCAGCCGCGGTAATACAGAGGTCCCAAGCGTTACTGAGATTCACTGGGTTTAAAGGGT  
GCGTAGGTGGTCCGTTAAGTCAGTTGTGAAATCCCCGGGCTCAACCTGGGAACCTGCTTCT  
GATACTGGCGGACTTGAGGCCTGTAGGGGTCACTGGAACCTGACGGTGGAGCGGTGAAATG  
CGTAGATATCGTCAGGAACGCCTGTGGTGAAGACGGGTGACTGGGCAGGCTCTGACACTG  
AGGCACGAAAGCGTGGGGAGCGAACGGGATTAGATACCCCGTAGTCC

>Otu12975

CCAGCCTACGGGTGTCAGCAGTGGGGAATATTGCGCAATGGCCGAAAGGCTGACGCAGCG  
ACGCCGCGTGTGGGATGACGGCCTTCGGGTGTAAACCACTGTGCGGAGGAACGAATACC  
GGGCGTCGAATAGCGACCCGGGGCGACGGTACCTCCAAAGGAAGCACCGGCTAACTCCG  
TGCCAGCAGCCGCGGTAATACGGAGGGTGCAGCGTTGTCCGGAATCACTGGGCGTAAAG

GGTGCGTAGGTGGCTCGTTAAGTGGCTGGTGAAATCCCGGGGCTCAACTCCGGGGCTGCC  
GGTCAGACTGGCGGGCTCGAGCACGGTAGAGGCAGATGGAATCCCGGTGTAGCGGTGGA  
ATGCGTAGATATCGGGAAGAATACCGGTGGCGAAGGCGTTCTGCTGGACCGTTGCTGACA  
CTGAGGCACGACAGCGTGGGGAGCAGACAGGATTAGATACCCTGGTAGTCC

>Otu12976

CCAGCCTATGGGACGCTGCAGTGGGGAATTTTGCACAATGGACGAAAGTCTGATGCAGCG  
ACGCTGCGTGAAGGATGAAGGCCCTAGGGTCGTAAACTTCTTTTAGCGGGGAGTAATCAT  
GAACGTACCCGCAGAATAAGCACCGGCTAACTACGTGCCAGCAGCCGCGGTAATACGTAG  
GGTGCAGAGCGTTATTCGGATTTACTGGGCGTAAAGAGCGTGTAGGTTGTTTGATGCGTCT  
TCGATTAAAGACCCAAGCTCAACTTGGGGAGTGTTGAGGATACGATCAGACTAGAGGTTT  
GCAGGGGCAGATGGAATTCCTGGTGTAGCAGTGAAATGCGTAGATATCAGGACGAACACC  
AATGGCGAAAGCAGTCTGCTGGGCTTACTCTGACACTGAGATGCGAAAGCGTTGGGAGCG  
AACGGGATTAGAACCCGTGTAGTCC

>Otu12977

CCAGCCTACGGGGGGCAGCAGTGAGGAATTTTCCGCAATGGGCGAAAGCCTGACGGAGCG  
ACGCCGCGTGTGGGATGAAGGCCTTCGGGTCTGTAAACCACTGTCGAAGGGGACGATATTG  
ACGGTACCCTTGAGGAAGCCCCGGCTAACTACGTGCCAGCAGCCGCGGTAAGACGTAGG  
GGGCAAGCGTCGTCCGAATTATTGGGCGTAAAGCGCTCGTAGGTGGATCGGCAAGTCCG  
CAAGCAAAGCCCTGAGCTCAACTCAGGAATCCGTGTGGAACTGCCGACCTTGAGGTAAT  
CAGAGGATGATGGAATTCCTGGTGTAGCGGTGAAATGCGTAGATATCGGGAGGAACACCA  
GTGGCGAAGGCGATCATCTGGGGTTAACCTGACACTGAGGAGCGAAAGCTAGGGGAGCAA  
ACGGGATTAGAAACCCCTCGTAGTCC

>Otu12980

CCAGCCTATGGGTGGCTCCAGTCGAGGATCTTCGTCAATGGGCGCAAGCCTGAACGAGCG  
ACGCCGCGTGC CGCATGAAGGCCTTCGGGTGTAAAGCGCAAAAGAGAAGAGAAAGCCGA  
AAGGTTGATCAATTCTCAGTAAGGACGGGCTAAGTTTCGTGCCAGCAGCCGCGGTAAGACG  
AACTGTCCTAACGTTGTGCGGAATCACTGGGCTTAAAGGGCGCGTAGGCGGTCTGCCAAG  
TCGGGGGTGAAACCCTGCAGCTTAACTGTAGTAGTGCCTTCGATACTGGCAGTCTGGAGG  
GAGATAGGGGTGTGCGGAACTTCCAGTGAGGCGGTGAAATGCGTTGATATTGGAAGGAAC  
GCCGAGGCGAAAGCGGCGCACTGGATCTCTTCTGACGCTGAGGCGCGAAAGCTAGGGGA  
GCAAACGGGATTAGAGACCCCTGTAGTCC

>Otu12988

CCGCCTACGGGGGGCTCCAGTAGGGAATCTTGCGCAATGGGCGAAAGCCTGACGCAGCCA  
TGCCGCGTGAATGATGAAGGTCTTAGGATTGTAAAATTCTTTCAGCGGGGTCGATAATGA  
CGGTACCCGCAGAAGAAGCCCCGGCTAACTTCGTGCCAGCAGCCGCGGTAATACGAAGGG  
GGCTAGCGTTGCTCGGAATTACTGGGCGTAAAGGGCGCGTAGGCGGCTGTCATAGTCAGA  
TGTGAAATTCTTGGGCTTAACTTGGGGGCTGCATTTGATACGTGGCGGCTAGAGTGC GGA  
AGAGGGTTCGTGGAATTCCCAGTGTAGAGGTGAAATTTCGTAGATATTGGGAAGAACACCGG  
TGCGCAAGGCGGCGACCTGGTCCGATACTGACGCTGAGGCGCGAAAGCGTGGGGAGCAAA  
CAGGATTAGATACCCGGGTAGTCC

>Otu12992

CCAGCCTACGGGGGCGACCAAGTGGGGAAAACTTTACAATGCGCGAAAGCGTGATAAGGGA  
ATCCTTCGTGCTCTAGTCTAACTAGGGCTTTTGCCAAGGGTAAAATCCTTGCGAATAAG  
TGGTGGGCAAGACTGGTGCCAGCCGCCGCGGTAACCCAGCGCCACGAGTGGCATCCAGC  
TTTATTTGGTCTAAAGCGTCCGTAGCTGGCGCGTTACATTCTCTGTGAAATCGTGGCGCT  
CAACGTCACGACGTGCAGAGAAGACGGACACGCTAGGGACCAGGAGAGTTCAGCAGTATT  
CTGTGGGGAGCGGTAAAATGCTATAATCCACAGAGGACTACCAATGGCGAAGGCAGCTGG  
CCAGAATGGATCCGACAGTGAGGGACGAAAGCTAGGGGAGCGATCCGGATTAGAAACCC  
AGTAGTCCC

>Otu13000

CCAGCCTATGGGGGGCACCAGTCGAGAATCTTCGCAATGGACGAAAGTCTGACGGAGCG  
ACGCCGCGTGGTGCATGAAGCGCTTCGGCGCGTAAAAACCTTTTATGAGCGACTAAGTTT  
ATTGAAGAGCTCATGAATAAGTGGTTGCTAAACTCGTGCCAGCAGCAGCGGTAATACGAG  
TGCCCCAAGCGCTATCCGGAATTATTGGGCGTAAAGGGTGTGTAGGCGGTCTGTGTTAGTC  
TCGCGTTAAATTCTTCGGCTTAAACGGGGGCATGCGCGGGAAACGGCACGACTAGAAGAT  
GCGAGGGGTCTCTGGAACCTCATGGTGTAGCGGTGAAATGCGTTGATATCATGGGGAACAC  
CGAAAGCGAAGGCAGGAGACTAGAGCATTCTTGACGCTGAAACACGAAAGCGTGGGTAGC  
GAATGGGATTAGAAACCCCTGTAGTCC

>Otu13005

CCAGCCTACGGGAGGCTCCAGTCGAGAATCATTCGCAATGGGCGCAAGCCTGACGATGCG  
ACGCCGTGTGGACGATGAAGGCCTTCGGGTGTAAAGTCTTTTCGCCTGGGAACAAGAAA  
TGCAAACATAACTTTTGCAAATTTGAGGGTACCAGGTAAAGATGCACCGGCTAACTCCGT  
GCCAGCAGCTGCGGTAATACGGAGGGTGCAAGCATTAATCGGATTTATTGGGCGTAAAGG  
GGGCGTAGGCGGAGATAAAAAGTCAGGCGTGAAATTACGGGGCTCAACCCCGTAGCCGCAC  
CTGAAACTCTATTTCTAGAGGATAGACGGAGAAAACGGAATTCACAAGTAGCGGTGAAA  
TGCGTAGATATGTGGAAGAACATCTGTGGCGAAGGCGGTTTTCTAGTTTAAACCTGACGC  
TAAGGCCCGAAAAGCGAGGGGAGCAAACAGGATTAGAGACCCCTGTAGTCC

>Otu13011

CCAGCCTACGGGTGGCACCAGTTGGGAATATTGCGCAATGGGCGAAAGCCTGACGCAGCA  
ACGCCGCGTGTGCGATGAAGGCTTCGGATCGTAAAGCACTTTTCGGCCGGGAAGAAAACC  
TGCCCATTCATAATGGGTAGCTTGACTGTACCGGAAGAAGAAGCACCGGCTAACTCTGTG  
CCAGCAGCCGCGGTAATACAGAGGGTGCAAGCGTTGTTTCGGAATTATTGGGCGTAAAGCG  
CGTGTAGGCGGCTCGTTATGTCGGGTGTGAAAGCCCTCGGCTCAACCGAGGAAGTGCGCC  
CGAAACTGGCGAGCTTGAGTGCCGGAGAGGACAGTGGAACACCCGGTGTAGAGGTGAAAT  
TCGTAGATATCGGGTAGAACACCAGTGGCGAAGGCGACTGTCTGGACGGACACTGACGCT  
GAGACGCGAAAGCGTGGGGAGCAAACAGGATTAGATAACCCGCGTAGTCC

>Otu13016

CCAGCCTACGGGAGGCACCAGTTAGGAATCTCCACAATGGGCGAAAGCCTGATGGAGCG  
ACGCCGCGTGAAGGATGAAGCCCTTACCGGGTGTAAACTTCTGTTGTGAGGGACGAAATT  
TTTGACGGTACCTCACGAGAAAGCACCGGCTAATTCTGTGCCAGCAGCCGCGGTAAGACA  
GAAGGTGCAAGCGTTACTCGGAATTACTGGGCGTAAAGCGTCTGTAGGTGTCCTGTCACG  
TCTGAGGACAAATCGCGGGGCCAACCCCGCGCTCTTCTTGGATACGAGCAGGATGGAGC  
CACTCAGAGGCATCTGGAATGTCGTGTGTAGGGGTAAAATCCGTAGATACACGATGGAAC  
GCCAAAAGCGAAAGCAGGATGCTGGGGGTGTGCTGACACTCAGAGACGAAAGCGTGGGGA  
GCAAAGGAGATTAGAAACCCCAGTAGTCC

>Otu13020

CCAGCCTACGGGATGCAGCAGGGAATATTGGACAATGGGCGAGAGCCTGATCCAGCCATG  
CCGCGTGCAGGAAGAAGGCCTTCTGGGTTGTAAACTGCTTTTGCCAGGGGATAAAAAGACC  
CGTGCGCGGGGAATTGAAGGTACCTGGTGAATAAGCCACGGCTAACTACGTGCCAGCAGC  
CGCGGTAATACGTAGGTGGCAAGCGTTGTCCGATTTATTGGGTTTAAAGGGTGCGTAGG  
CGGACTTATAAGTCAGTGGTGAAATCTCGATGCTTAACATCGAACGTGCCATTGATACTG  
TAGGTCTTGAGTACAGATGCCGTTGGCGGAATGTGTGTCATGTAGCGGTGAAATGCATAGAT  
ATGACACAGAACACCGATTGCGAAGGCAGCTGACGAAACTGTAACCTGACGCTGAGGCACG  
AAAGCGTGGGGATCAAACAGGATTAGATAACCCGCGTAGTCC

>Otu13031

CCAGCCTACGGGAGGCAGCAGTGGGGAATATTGGACAATGGGGGCAACCCTGATCCAGCG  
ACGCCGCGTGTGTGAAGAAGGCCTGCGGGTGTAAAGCACTTTTAGTGGGGATGAAAAGC  
TCAGGGCTAATACCCCGGGTCTTGACCTAACCTACAGAAAAAGCACCGGCTAACTCTGT  
GCCAGCAGCCGCGGTAATACAGAGGGTGCGAGCGTTGTTTCGGAATTATTGGGCGTAAAGG  
GTGCGTAGGCGGTGCCACAAGTCACCTGTGAAATCCCCAGGCTTAACCTGGGGCCTGCAG  
GCGAAACTGTGGTGCTGGAATATGGGAGAGGTGCGTGGAATTCCTGGTGTAGCGGTGAAA  
TGCGTAGATATCGGGAGGAACACCTGTGGCGAAAGCGGCGCACTGGACCATAACTGACGC  
TGATGCACGAAAGCTAGGGGAGCAAACAGGATTAGAAACCCCTGTAGTCC

>Otu13032

CCAGCCTATGGGTGCGAGCAGTAAGAAATATTGGTCAATGGACGCAAGTCTGAACCAGCC  
ATGCCGCGTGGAGGATGAATGCCCTCTGGGTGTAAACTCCTTTTATCTTGGAAGAAACC  
CGAGAATTCCTTTTCGGTTGACGGTACCAGAGGAATAAGCACCGGCTAACTCCGTGCCAG  
CAGCCGCGGTAATACGGAGGGTGCAAGCGTTATCCGGATTAACCTGGGTTTAAAGGGTGCG  
TAGGTGGGCAGGTAAAGTCAGTGGTGAAATCTTTGGGCTTAACCCGAAACTGCCATTGAT  
ACTATCTGTCTTGAATGTTGTGGAGGTGAGCGGAATATGTCATGTAGCGGTGAAATGCTT  
AGATATGACATAGAACATCGATTGCGAAGGCAGCTCGCTACGCAATATCGACACTGAGG  
CACGAAAGCGTGGGGATCAAACAGGATTAGAGACCCCGTAGTCC

>Otu13048

CCAGCCTATGGGGCGCACCAAGTGGGGAATATTGGACAATGGGCGAAAGCCTGATCCAGCA  
ATGCCGCGTGAAGTGAAGGCCTTAGGGTGTAAAGCTCTTTTCGGGTGGGACGATGATG  
ACGGTACCACCAGAAGAAGCCCGGCTAACTTCGTGCCAGCAGCCGCGGTAATACGAAGG

GGGCTAGCGTTGTTTCGGAATTACTGGGCGTAAAGCGCGCGCAGGCGGCTTCTCAAGTCAG  
GGGTGAAAGCCCAGAGCTCAACTCTGGAAGTGCCTTGAAACTGTGGAGCTTGAGTACGG  
GAGAGGTGAGTGGAATTCACAGTGTAGAGGTGAAATTCGTAGATATTGGGAAGAACACCG  
GTGGCGAAGGCGGCTCACTGGCCCGTTACTGACGCTCAGGCGCGACAGCGTGGGGATCAA  
ACAGGATTAGAAACCCGTGTAGTCC

>Otu13061

CCAGCCTATGGGTCGCAGCAGTCGAGAATCTTTCGCAATGGGCGAAAGCCTGACGAAGCG  
ACGCCGTGTGAGCGAAGAAGGCCTTCGGGTGTAAAGCTCTTTCGCCGGGGAACAAGAGA  
CTAGGAATAACACTCCTAGAAATTTGAGGGTACTCGGTAAAGAAGCACCGGCTAACTCCGT  
GCCAGCAGCTGCGGTAATACGGAGGGTGCAAGCATTAAATCGGATTTATTGGGCGTAAAGG  
GCGCGTAGGCGGGAAGGTCAGTCAGATGTGAAATCCCTAGGCTTAACCTTGGAAGTGCAT  
TTGATACTGCCTTTCTTGAGGGTAGAAGGAGAAAGTGGAATTCACAAGTAGCGGTGAAA  
TGCGTAGATATGTGGAAGAACACCAGTGGCGAAGGCGACTTTCTATTTTACTCCTGACGC  
TGAGGCGCGAAAGCTAGGGGAGCAAACAGGATTAGAAACCCGCGTAGTCC

>Otu13067

CCAGCCTACGGGGGGGCTGCAGTTGGGAATCTTGGAACAATGGGGGAAACCCTGATTCAGCC  
ATGCCGCGTGAGTGATGAAGGCCTTCGGGTGTAAAGCTCTTTCGACGGGGACGATAATG  
ACTGTACCGGGGAGAATAAGCTCCGGCTAACTTCGTGCCAGCAGCCGCGGTAATACGAAGG  
GGGCCAGCGTTGCTCGGAATTACTGGGCGTAAAGGGTCCGTAGGCGGTGTGGCAAGTCGG  
TAGTGAAATCTCTGGGCTTAACCTCAGAGGCTGCTGCCGAAACTGCTGTGCTAGAGTGCAG  
GAGAGGCGAGTGGAATTGCGGGTGTAGCGGTGAAATGCGTAGATATCCGCAGGAACATCC  
GAGGCGAAAGCGGCTCGCTGGATCGCAACTGACGCTGAGGGACGAAAGCTAGGGGAGCAA  
ACAGGATTAGATACCCTCGTAGTCC

>Otu13075

CCAGCCTATGGGGTGCTGCAGTGGGGAATTGTTTCGCAATGGGCGCAAGCCTGACGACGCA  
ACGCCGCGTGAGGATGAAGCCCCTTGGGGCGTAAACTCCTTTCGACTGGGAAGATAATG  
ACGGTACCAGTGGAAGAAGCACCGGCTAACTCTGTGCCAGCAGCCGCGGTAATACAGAGG  
GTGCGAGCGTTGTTTCGGAATTATTGGGCGTAAAGGGCGCGTAGGCGGTATTGTAAGTCAC  
CTGTGAAACCTCTAGGCTTAACCTAGAGCCTGCAGGCGAAACTGCAATGCTGGAGGGTGG  
GAGAGGTGCGTGGAATTCACCGGTGTAGCGGTGAAATGCGTAGATATCCGGAGGAACACCT  
GTGGCGAAAGCGGCGCACTGGACCACTACTGACGCTGAGGCGCGAAAGCCGGGGGAGCAA  
ACAGGATTAGAAACCCCAGTAGTCC

>Otu13081

CCAGCCTACGGGTTGCTCCAGACGAGAATATTCGCAATGGACGAAAGTCTGACGGAGCG  
ACGCCGCGTGATGGATGAAGTGCCTTGGTACGTAAACATCTTTTATCGGGGACGAAGTTT  
ATTGACGGTACCCGATGAATAAGGGGCTCCTAACTCTGTGCCAGCAGGAGCGGTAATACA  
GAGGCCCAAGCATTACCCGGAATCACTGGGCGTAAAGGGTGTCTAGGCGGTATATTAG  
TCTCTCGTTAAATGTCCGGGCTCAACCTGGTCACCGCGAGGGAAACGGTATGACTCGAGG  
GCGTAAGAGGTGCACGGAACCTCATGGTGGAGGGGTGAAATCCGTTGATATCATGGGGAGC  
ACCAAATGCGAAGGCAGTACACTGGCGCATATTTGACACTGAAGCACGAAAGCGTGGGTA  
GCGAATGGGATTAGATACCCTTGTAGTCC

>Otu13092

CCAGCCTATGGGGTGCAACAGTCGAGAATCTTCCGCAATGGGCGAAAGCCTGACGGAGCG  
ACGCCGCGTGATTGATGAAGTCCTTCGGGACGTAAAAATCTTTTGGAAGGGAGAAAGTTA  
TTGATAGTATCTTCAGAATAAGGGGTGCTAAACTCGTGCCAGCAGCAGCGGTAATACGA  
GTGCCCCAAGCGTTATCCGGAATTATTGGGCGTAAAGGGTGTGTAGGCGGTCTTGTTAGT  
CTTCTGTCAAATCTTCGGCTTAACCGGGGGTCCGCAGAGGAAACGGCAAGACTTGAGGA  
TGCGAGAGGTACATGGAACCATAGTGTAGGGGTGAAATCCGTTGATATTATGGGGAACA  
CCGAAAGCGAAGGCAATGTACTGGCGCACTCCTGACGCTGAAACACGAAAGCGTGGGTAG  
CGAATGGGATTAGATACCCTTGTAGTCC

>Otu13099

CCAGCCTATGGGTTGCAGCAGTCGAGAATCTTCCGCAATGGACGAAAGTCTGACGGAGCG  
ACGCCGCGTGAGGATGAAGTCCTTAGGGACGTAAACTCCTTTTATAGGTTAGAAAGTTA  
TTGATCAACCTAGGAATAAGAGGTTGCTAAACTCGTGCCAGCAGCAGCGGTATACGAGTG  
CCTCAAGCGTTATCCGGAATTACTGGGCGTAAAGGGTGTGTAGGCGGTTCTATTAGTCTT  
GTGTAAGTCTTTCGCGCTTAACGCGAAATCTGCATAGGAAACGGTAGAACTAGAGGATGC  
AAGGGGCACATAGAAGTCAATGGTGTAGGGGTGAAATCCGTTGATATCATGGGGAATACCA  
AGAGCGAAGGCAGTGTGCTGGTGCATTCTGACGTTGAAACACGAAAGCGTGGGTAGCGA

ACGGGATTAGAAACCCCAGTAGTCC

>Otu13105

CCAGCCTATGGGGGGCTGCAGTGGGGAATATTGGACAATGGGCGAAAGCCTGATCCAGCA  
ATGCCGCGTGAGTGACGAAGGCCTTAGGGTTGTAAAGCTCTTTCGCAGGGGAAGATAATG  
ACGGTACCCTGATAAGAAGCACCGGCTAACTCCGTGCCAGCAGCCGCGGTAATACGGAGG  
GTGCTAGCGTTGTTTCGGAATTACTGGGCGTAAAGCGCGCGTAGGTGGTGCAGCAAGTTGG  
GAGTGAAATCCCAGAGCTTAACTCTGGAATTGCTTTCAAGACTGCTGCGCTAGAGTATGG  
CAGGGGATAGTGGAATTCCTAGTGTAGGGGTGAAATCCGTAGATATTAGGAGGAACACCA  
GAGGCGAAGGCGACTATCTGGGCCATTACTGACGCTGATGCGCGAAAGCGTGGGGAGTAA  
ACAGGATTAGATACCCTAGTAGTCC

>Otu13115

CCAGCCTATGGGAGGCAGCAGTGGGGAATATTGGACAATGGGGGCAACCCTGATCCAGCA  
ATGCCGCGTGAGTGATGAAGGCCTTAGGGTTGTAAAGCTCTTTCGGCGGGGACGATGATG  
ACGGTACCCGCGAGAAGAAGCCCCGGCTAACTTCGTGCCAGCAGCCGCGGTAATACGAAGG  
GGGCAAGCGTTGTTTCGGAATTACTGGGCGTAAAGGGCGCGCAGGCGGCCATCCTAGTCAG  
GCGTGAAAGCCCCGGGCTTAACCTGGGAATTGCGTTTGATACTTGGTGGCTGGAGTTCGG  
GAGAGGTTGGTGGAATTCACAGTGTAGAGGTGAAATTCGTAGATATTGGGAAGAACACCG  
GTGGCGAAGGCGGCCAACTGGACCGAAACTGACGCTGAGGCGCGAAAGCGTGGGGAGCAA  
ACAGGATTAGAAACCCCTGTAGTCC

>Otu13116

GGACTACTGGGGTATCTAATCCTGTTTGATCCCCACGCTTTCGTGCATCAGCGTCAATAT  
ATGCGTAGTGAGCTGCCTTCGCAATGGGTATTCTATGTCATATCTAAGCATTTTCACCGCT  
ACATGACATATTCTGCTCACCTCCACAATATTCAAGACAGATAGTATCAATGGCAGTTTT  
CGGGTTAAGCCCAAAGATTTACCACTGACTTACCTGCCCCGCTACGCACCCTTTAAACC  
CAGTGAATCCGGATAACGCTTGCACCCTCCGTATTACCGCGGCTGCTGGCACGGAGTTAG  
CCGGTGCTTATTCATCTGGTACCGTCAAGTGAGAAAGAATTCCCTTTTTTCGTCCCAGAT  
AAAAGAAGTTTACAATCCAGAGGACCTTCATCCTCCACGCGGCATGGCTGGTTCAGGCTT  
TCGCCCATTGACCAATATTCCCTTACTGGAGCACCCCGTAGGCTGG

>Otu13126

CCAGCCTATGGGACGCACCAGTGGGGAATTTTGGACAATGGGGGCAACCCTGATCCAGCC  
ATGCCGCGTGAGTGAAGAAGGCCTTCGGGTGTAAAGCTCTTTCGGCGGGGACGATGATG  
ACGGTACCCGTAGATAAAGCACCGGCTAACTACGTGCCAGCAGCCGCGGTAATACGTAGG  
GTGCAAGCGTTAATCGGAATTACTGGGCGTAAAGCGTGCGCAGGCGGTTCGCTAAGACAG  
ATGTGAAATCCCCGGGCTTAACCTGGGAACCTGCATTTGTGACTGGCGGGCTAGGGTATGG  
CAGAGGGGGGTAGAATTCACAGTGTAGCAGTGAAATGCGTAGAGATGTGGAGGAATACCG  
ATGGCGAAGGCAGCCCCCTGGGCCAATACTGACGCTCATGCACGAAAGCGTGGGGAGCAA  
ACAGGATTAGATACCCCTGTAGTCC

>Otu13131

CCAGCCTACGGGACGCTCCAGTGGGGAATATTGGACAATGGGGGAAACCCTGATCCAGCG  
ACGCCGCGTGTTGTGAAGAAGGCCCGCGGGTTGTAAAGCACTTTTAGTGGGGACAAAAAGC  
TACGGATTAATACTTCGTGGTCTTGATTTAACCCAAAGAAAAAGCACCGGCTAACTCTGT  
GCCAGCAGCCGCGTAATACAGAGGGTGCAGCGTTAATCGGAATTACTGGGCGTAAAGC  
GCGCGTAGACGGTTCGCTAAGACAGATGTGAAAGCCCCGGGCTCAACCTGGGAATGGCAT  
TTGAGACTGCGAAGCTAGAGTACGGCAGAGGGAGGTGGAATTCACAGTGTAGCAGTGAAA  
TGCGTAGATATGTGGAGGAACACCGATGGCGAAGGCAGCCTCCTGGGCCAGTACTGACGC  
TCATGCACGAAAGCGTGGGGAGCAAACAGGATTAGAAACCCCAAGTAGTCC

>Otu13151

CCAGCCTACGGGTCGCACCAGTCGAGAATCTTTCGCAATGGGCGCAAGCCTGACGAAGCG  
ACGCCGTGTGAGCGAAGAAGGCCTTCGGGTGTAAAGCTCTTTCGCTAGGGAACAAGAAA  
GACAGACTAATAACCTGTGATTTGATGGTACTTGGTAAAGAAGCACCGGCTAACTCCGT  
GCCAGCAGCTGCGGTAATACGGAGGGTGAAGCATTGATCGGAATTACTGGGCGTAAAGG  
GCGCGTAGGCGGTCAGGAAAGTCAGACGTGAAATCCCGGGGCTCAACCCCGGGGCTGCAT  
TTGAAACTTCCTATCTAGAGTTCAGTTAGGGAAAACGGAATTCACAGTGTAGCGGTGAAA  
TGCGTAGATATGTGGGAGAACACCAAGTGGTGAAGACGGTTTTCTGGGCTGATACAGACGC  
TGAGGCGCGAAAGCAAGGGGAGCAAACAGGATTAGATACCCCGTAGTCC

>Otu13152

CCAGCCTATGGGGCGCAGCAGTAGGGAATCTTGGACAATGGGCGAAAGCCTGATCCAGCC  
ATGCCGCGTGTTGTGATGAAGGCCTTAGGGTTGTAAAGCACTTTCGCCAGGGAAGATAATG

ACGGTACCTGGATAAGAAGCCCCGGCTAACTTCGTGCCAGCAGCCGCGGTAATACGAAGG  
GGGCTAGCGTTGTTTCGGAATTACTGGGCGTAAAGCGCACGTAGGCGGTTTTTCAAGTTGG  
AGGTGAAATCCCCGGACTTAATCTGGGAAGTGCCTTCAAGACTGGGAGACTTGAGTCCGA  
GAGAGGTGAGTGGAATTTCCAGTGTAGAGGTGAAATTCGTAGATATTGAAAGAACACCA  
GTGGCGAAGGCGGCTCACTGGCTCGGTACTGACGCTGAGGAGCGACAGCGTGGGGAGCAA  
ACAGGATTAGAACCCTTG TAGTCC

>Otu13159

CCAGCCTATGGGACGCTGCAGTAAGGAATATTGGACAATGCTCGCAAGAGTGATCCAGCC  
ATGCCGCGTGCAGGAAGACGGCCCTATGGGTTGTAAACTGCTTTTGAAGTAGAGAAAACC  
CCACTACGTGTAGTGGGCTGATAGTATAGTTAGAATAAGCATCGGCTAACTTCGTGCCAG  
CAGCCGCGGTAAGACGAAGGATGCAAGCGTTATCCGGATTCATTGGGTTTAAAGGGAGCG  
TAGGTGGACTTATAAGTCAGTGGTGAAATACGGCAGCTCAACTGTGAGGTGCCATTGAT  
ACTGCAGGGCTTGAGTACAGACGAGGTAGGCGGAATTGACGGTGTAGCGGTGAAATGCTT  
AGATATCGTCAAGAACACCGATAGCGAAGGCAGCTTACTAGGCTGTAACTGACGCTGAGG  
CACGAAAGTGTGGGGATCAAACAGGATTAGATACCCGCGTAGTCC

>Otu13161

CCAGCCTACGGGGGGCAGCAGTAGGGAATTTTCCACAATGGGCGCAAGCCTGATGGAGCA  
ACGCCGCGTGCAGGATGAATGTCTTCGGATTGTAAACTGCTTTTCTCTGTGACGATTTTG  
ACGGTAGCAGAGGAATAAGGACCTGCTAACTACGTGCCAGCAGCCGCGGTCATACGTAGG  
GTCCAAGCGTTATCCGGAATTACTGGGCGTAAAGAGTTGCGTAGGTGGCAGAGTAAGTCT  
GTAGTGAATCGTGTGGCTCAACCACATATACATTATGGAACTGCTCAGCTAGAGGACG  
AGAGAGGTTATTGGAATTCACAGTGTAGGAGTGAAATCCGTAGATATTGGGAGGAACACC  
GATGGCGTAGGCAGATAACTGGCTCGTTCCTGACACTAAGGCACGAAAGCGTGGGTAGCA  
AACGGGATTAGATACCCGGTCC

>Otu13173

CCAGCCTATGGGGCGCTCCAGTGGGGAATATTGGACAATGGGGGCAACCCTGATCCAGCA  
ATGCCGCGTGTGTGAAGAAGGCCTTCGGGTTGTAAAGCACTTTAGTTGGGGAAGAAGGTA  
ATTAGTTTAAGAGATAAATTATTTGACGGTACCCAAAGAATAAGCACCGGCTAACTCTGT  
GCCAGCAGCCGCGGTAATACAGAGGGTGCAAGCGTTAATCGGAGTTACTGGGCGTAAAGG  
GCGCGTAGGCGGTTATTTAAGTTGGATGTGAAATCCCTGGGCTTAACCTAGGAACTGCAT  
TCAAACTGGGTAAGTAGAGTACTGTAGAGGGTAGTGGAATTTCCGGTGTAGCGGTGAAA  
TGCGTAGAGATCGGAAGGAACACCAAGTGCGAAGGCGGCTACCTGGACAGATACTGACGC  
TGAGGCGCGAGAGCGTGGGGAGCAAACAGGATTAGAAACCCCTGTAGTCC

>Otu13176

CCAGCCTACGGGTGGCAGCAGTAAGGGATATTGCGCAATGGGCGAAAGCCTGACGCAGCA  
ACGCCGCGTGGAGGATGAAGGCCTTCGGGTCGTAAACTTCTTTTAGCAGGGACGAGGAAG  
GACGGTACCTGCGGAATCAGTCACGGCTAACTACGTGCCAGCAGCCGCGGTAACCGTAG  
GTGGCAAGCGTTATCCGGATTACTGGGCGTAAAGGGTGTGCAGGCGGGACTGCAAGTGG  
TGTATGAAATCTCCAGGCTCAACCTGGAGGGGTTATGCCAGACTGCAGTTCTAGAGGGCG  
AGAGAGGGGGGTGGAATTCGGGTTAGTGGTGAAATGCGTAGAGATCCGGAGGAACCCC  
AGAGGCGAAGGCGGCCCCCTGGCTCGTACCTGACGCTCAGCCACGAAAGCTAGGGGAGCA  
AACAGGATTAGATACCCTTG TAGTCA

>Otu13181

CCAGCCTATGGGGTGCAGCAGTAGGGAATATTGGACAATGGACGAAAGTCTGATCCAGCA  
ATGCCGCGTGAATGATGAAGGCCTTAGGGTTGTAAAGTTCTTTAAGTGGGGAAGATAATG  
ACGGTACCCACAGAATAAGCACCGGCTAACTCCGTGCCAGCAGCCGCGGTAATACGGAGG  
GTGCAAGCGTTGTTTCGGAATTACTGGGCGTAAAGCGCGCGTAGGCGGCTTTGTAAGTTGG  
GAGTGAAATCCCGGGGCTTAACTCCGGAATTGCTTTCAAACTACAAAGCTAGAGTATGG  
CAGGGGACAGTGGAATTCCTAGTGTAGAGGTGAAATTCGTAGATATTAGGAGGAACACCA  
GTGGCGAAAGCGACTGTCTGGACCATTACTGACGCTGAGGCGCGAAAGCGTGGGGAGCAA  
ACAGGATTAGATACCCCGGTAGTCC

>Otu13186

CCAGCCTATGGGTTGCACCAGTAGGGAATTTTCCACAATGGGCGCAAGCCTGATGGAGCA  
ACGCCGCGTGCAGGATGAATGTCTTCGGATTGTAAACTGCTTTTCTCTGTGACGAATATG  
ACGGTAGCAGAAAGAATAAGGACCTGCTAACTACGTGCCAGCAGCCGCGGTCATACGTAGG  
GTCCAAGCGTTATCCGGAATTACTGGGCGTAAAGAGTTGCGTAGGTGGCATTGTAAGCGG  
GTAGTGAAATGACGAGGCTCAACCTCGTGTCCATTACCTGAACTGCAAAGCTAGAGGATG  
AGAGAGGTTATTGGAATTCCTGTGTAGGAGTGAAATCCGTAGATATAGGGAGGAACACC

GATGGCGTAGGCAGATAACTGGCTCATTCCTGACACTAAGGCACGAAAGCGTGGGGAGCA  
AACAGGATTAGAAACCCCTGTAGTCC  
>Otu13191  
CCAGCCTACGGGTTGCTGTCAGTCGAGGATCTTTTCGCAATGGGCTAAAGCCTGACGAAGCG  
ACGCTGTGTGAGTGATGAAGGCCTTCGGGTGTAAAGCTCTTTCGCTTGGGAACAAGAAA  
TGTAATGAATAATTGCCAAATTTGAGGGTACCAGGTAAAGAAGCACCGGCTAACTACGT  
GCCAGCAGCTGCGGTAATACGTAGGGTGCAAGCATTAAATCGGAATTATTGGGCGTAAAGG  
GCGCGTAGGCGGAAACGCAAGTCAGATGTGAAATTCCAAAGCTCAACTTTGGAGCTGCAT  
TTGAAACTGCGATTCTTTGAGGTATGGCGGAGAAAGCGGAATTCCACGTGTAGCGGTGAA  
ATGCGTAGATATGTGGAAGAACACCAGTGGCGAAAGCGGCTTTCTAGTTTTTACCTGACG  
CTGAGGCGCGAGAGCAAGGGGAGCAAACAGGATTAGAAACCCCTCGTAGTCC  
>Otu13195  
CCAGCCTACGGGGGGCACCAGTCGAGAATCTTCGGCAATGGGCGCAAGCCTGACCGAGCG  
ACGCCGCGTGTGGGATGAAGGCCCTTGGGTGTAAACCACTGTCAGAGGGGATGAAGTGC  
CGGAGAGCTATCTCTCCGGTTTGACATAGCCTCAGTGGAAGCACGGGCTAAGTTTCGTGCC  
AGCAGCCGCGGTAATACGAACGTGTGCAAACGTTATTTCGAATCACTGGGCTTAAAGAGTG  
CGTAGGCGGCTGTTTTAAGTAGGGTGTGAAAGCCCCCGGCTCAACCGGGGAATGGCGCCCT  
AAACTAGACAGCTGGAGTGGGACAGGGGTGTACGGAACCTCCGGTGGAGCGGTGAAATGT  
GTTGATATCGGAAGGAACGCCGGTGGCGAAAGCGGTACACTGGGTCTCAACTGACGCTGA  
GGCACGAAAGCCAGGGGAGCAAACGGGATTAGAAACCCGTGTAGTCC  
>Otu13196  
CCAGCCTATGGGTGGCAGCAGTAGGGAATTTTCCACAATGGACGCAAGTCTGATGGAGCA  
ACGCCGCGTGCAGGAGGAAGGCCTTCGGGTGTAAACTGCTTTTATTTGTGAAGATTTTG  
ACTGTAACAAATGAATAAGGACCTGCTAACTACGTGCCAGCAGCCGCGGTACATACGTAGG  
GTCCAAGCGTTATCCGGAATTACTGGGCGTAAAGAGTTGCGTAGGTGGCATAGTAAGCAA  
ATAGTGAAAGCGTGAGGCTCAACCTCATATCCATTGTTTGAAGTCTAAGCTTGAGCATG  
AGAGAGGTAGATGGAATTTCTAGTGTAGGAGTGAAATCCGTAGATATTAGAAGGAACACC  
GATGGCGTAGGCAGTCTACTGGCTCATTCGTGACGCTGAGACATGAAAGCGTGGGAATCG  
AACGGGATTAGAGACCCTCGTTAGTCC  
>Otu13198  
CCAGCCTACGGGGGGGCTGTCAGTGGGGAATCTTGGACAATGGGGGCAACCCTGATCCAGCC  
ATGCCGCGTGAGTGATGAAGGCCTTCGGGTGTAAACTGTTTCGACGGGGACGATGATG  
ACGGTACCCGTAGAAGAAGCCCCGGCTAACTTCGTGCCAGCAGCCGCGGTAATACGAAGG  
GGGCTAGCGTTGCTCGGAATGACTGGGCGTAAAGGGCGCGTAGGCGGTTTCGTACAGTCAG  
GCGTGGAATTCCCGGGCTCAACCTGGGGGCTGCGTTTGATACGTACGGGCTTGAGTTCGG  
AAGAGGGTCGTGGAATTTCCAGTGTAGAGGTGAAATTCGTAGATATTGGGAAGAACACCG  
GTGGCGAAGGCGGCGATCTGGGCCAATACTGACGCTGAGGAGCGAAAGCGTGGGGAGCGA  
ACAGGATTAGAAACCCGTGTAGTCC  
>Otu13202  
CCAGCCTACGGGGGGGCTGTCAGTAGGGAATATTGGACAATGGGCGAGAGCCTGATCCAGCC  
ATGCCGCGTGAGGAAGAAGGCCTTCTGGGTGTAAAGCACTTTTAGTGGGGATGAAAAG  
TTCAGGGCTAATACCCTTGGATCTTGACCTAACCTACAGAAAAAGCACCGGCTAACTCTG  
TGCCAGCAGCCGCGGTAATACAGAGGGTGCAGCGTTAATCGGAATTACTGGGCGTAAAG  
CGTGCGTAGACGGTTCTGTAAAGTCGGATGTGAAATCCCCGGGCTCAACCTGGGAATTGCA  
TTCGAGACTGCAAAGCTAGGGTGCGGAAGAGGGAAGCGGAATTTCCGGTGTAGCGGTGAA  
ATGCGTAGATATCGGAAGGAACATCAGTGGCGAAGGCGGCTTCCTGGTCCAGCACCGACG  
TTCAGGCACGAAAGCGTGGGGAGCAAACAGGATTAGAGACCCTTGTAGTCC  
>Otu13211  
CCAGCCTACGGGACGCTGTCAGTGGGGAATCTTGACAATGGAGGAAATCTGATGCAGCG  
ACGCCGCGTGAGCGATGAAGCCCTTCGGGTGTAAAGCTCTTTCGACGGGAACGATCATG  
ACGGTACCTGAGGAAGAAGCTGCGGCTAACTACGTGCCAGCAGCCGCGGTAAGACGTAGG  
ATGCAAGCGTTGTCCGATTTATTGGGCGTAAAGAGTTTCGTAGGCGGTTTGTAAAGTCTG  
ACGTTAAAGATCAGGGCCCAACCCTGGGAATGCTTTGGATACTGACAGACTGGAGTGTGG  
TAGAGGTAAGTGGAATTTCTGGTGTAGCGGTGAAATGCGTAGATATCAGAAAGAACACCA  
GTGGCGTAGGCGACTTACTGGGCCATAACTGACGCTGAGGAACGAAAGCCAGGGGAGCGA  
ATGGGATTAGAAACCCCTGTAGTCC  
>Otu13225  
CCAGCCTATGGGTGCGACCAGTGAGGAATATTGCACAATGGGCGAAAGCCTGATGCAGCG

ACGCCGCGTGGAGGATGAGGGTCTTCGGATTGTAACTCCTGTTAAATGGGAAAAAGAG  
TCCTTCTGAATAGGGAGGAAAAGATGATGGTACCATTAAAGAAAGCACCGGCTAACTTCGT  
GCCAGCAGCCGCGTAATACGAGGGGTGCAAGCGTTATTTCGGATTTATTGGGCGTAAAGG  
GTGTGTAGGCGGTTTTTTAAGTCATTTATTAAATGCCTTGGCTTAACCAAGGAAATGTGG  
GTGAACTAGAACTAGAGTGTGGAAGAGAGAAGTGAATTCTCGGAGTAGCGGTAAAA  
TGCGTAGATCTCGAGAGGAACACCGATGGCGAAGGCAGCTTCTTGGTCCATTACTGACGC  
TCAAACACGAAAGCGTGGGGAGCAAACAGGATTAGATAACCCGGGTAGTCC

>Otu13230

CCAGCCTATGGGTGGCAGCAGTGAGGAATTTTGGGCAATGAGCTAACGCTTGACCCATTG  
ACGGTTTATGAGTGAGAAAAGGACAGCAATAACGCTGTAAAGCTCTTTTGTGAGGAAGA  
TAAATGACTGTACTCAAAGAATAAGCACTGGCTAATTCTGTGCCAGCAGCCGCGGTAAACA  
CAGGGAGCGCGAACGTTATCCGGAATTATTGGGCGTAAAGGATATGTAGGCAGTTTTGGT  
TGGATATTTTGTGAAATCCTCGAGAAAATCCTTGGCGAGGACAAAAGTTACCCAAAACT  
TTGAGTTTTTGAGAAAGGTTAAAAGAATTTCTTGTGTAAGGGTAGAATCTTAACATACTAG  
AGAGACTGCCGAAACAGTAGCGAAGGCATTTTTCTAGCTCTAACTGACGCTGAGATATGA  
AAGGATAGGGAGCAAACGGGATTAGAAACCCCGGTAGTCC

>Otu13242

CCACCCTATGGGAGGCAGCAGCTTGGGAATATTGCACAATGGGGGAAACCCTGATGCAGCG  
ACGCCGCGTGGAGGATGAAGGATCTAGGTCTGTAACTCCTTTTATCGGGAAAGACTTAG  
GACGGTACCCGATGAATAAGCACCGGCTAACTACGTGCCAGCAGCCGCGGTAAAGACGTAG  
GGTGCAGCGTTGTCCGGATTTACTGGGCGTAAAGGACGCGTAGGCGGTCCGTTAAGTGT  
GAAGTGAATCTCCAGGGCTCAACCCGGAACCTGCTTCGCATACTGTGCGACTAGAGGGA  
TGCAGAGGTAGCTAGAATTCCTGGTGTAGCGGTGAAATGCGTTGATATCAGGAGGAATAC  
CCATGGCGAAGGCAGGCTACTGGGCATCATCTGACGCTGAGGCGTGAAAGCGTGGGTAGC  
AAACAGGATTAGAGACCCCCGTAGTCC

>Otu13265

CCAGCTATGGGGTGCAGCAGTGGGGAATCTTGCACAGTGGGCGAAAGCCTGATGCAGCGA  
CGCCGCGTGGGGGATGAAGCTTTTCGGAGTGTAAACCCCTTTCGACTGGGACGAATGCC  
GCAAGGGAGTGACGGTACCAGTATAAGAAGCCCCGGCTAACAACGTGCCAGCAGCCGCGG  
TAAGACGTAGGGGGCCAGCGTTGTTCCGAATTACTGGGTGTAAAGGGTTTCGTAGGCGGTG  
CGGCAAGTTGGGAGTGAAATCTCTGGGCTCAACCCAGAGGCTGCTTCCAAAACCTGCTGTG  
CTTGAGTGTGAGAGAGGCTCGTGGAATTGCAGGTGTAGCGGTGAAATGCGTAGATATCAG  
GAGGAACACCGGTGGTGTAGACGGCTTTCTGGACCGTAACTGACGCTGAAACACGAAAGC  
GTGGGTAGCAAACAGGATTAGATAACCCCCGTAGTCC

>Otu13266

CCAGCCTATGGGGGGCTGCAGTAACGAGTATTGGGCAATGGGCGAAAGCCTGACCCAGCG  
ACGCCGCGTGCAGGATGAAGTCCTTCGGGATGTAACTGCTGTCAGGGGCTGCCAAGCAA  
CCGTAATTAACATCTACGGAAGTTGAGGAGCCCCAGAGGAAGCCACGGCTAACTTCGTGC  
CAGCAGCCGCGGTAAAGACGAAGGTGGCAAGCGTTGTTCCGAATCATTGGGCTTAAAGCGC  
ACGTAGGCGGCTCTTCAAGTGTCTTGTGAAATCCCTCGGCTCAACCGAGGAATTGCTGGG  
CATACTGTGAGCTTGAGGTAGGTATGGACGAGTGGAACCTTGGTGGAGCGGTGGAATG  
CATAGATATCAAGAGGAACGCCGGTGGTGAAGACGACTCGCTGGGCCTATCCTGACGCTG  
AGGTGCGAAAGCCAGGGGAGCAAACGGGATTAGAAACCCCTGTAGTCC

>Otu13271

CCAGCCTACGGGGGGCAGCAGTGAGGAATATTGGACAATGGTGGCAACACTGATCCAGCC  
ATGCCGCGTGCAGGATGAAGGCGCTACGCGTTGTAACTGCTTTTGTACCAGAGAAAACC  
TATCTACGTGTAGATAGCTGATAGTATGGTAAGAATAAGCATCGGCTAACTTCGTGCCAG  
CAGCCGCGGTAAATACGGAGGGTGCAAGCGTTATCCGGATTTACTGGGTTTAAAGGGTGCG  
TAGGCGGTGCGGTAAAGTCTTCTGTGAAATCTCCGGGCTCAACTCGGAGTCTGCAGGAGAA  
ACTGCCGTGCTTGAGTATGGGAGAGGTGAGTGGAATTCCTGGTGTAGCGGTGAAATGCGT  
AGATATCAGGAGGAACACCTGTGGCGAAAGCGGCTCACTGGACCATAACTGACGCTGATG  
CACGAAAGCTAGGGGAGCAAACAGGATTAGAAACCCGCGTAGTCC

>Otu13278

CAGCCTATGGGGGGCAGCAGTGAGGAATATTGCACAATGGGCGCAAGCCTGATGCAGCGA  
CGCCGCGTGGAGGAAGAAGGTTTTTCGGATTGTAACTCCTGTTAAGTGGGAAAAAATCCT  
GACGGATAATACCCGATTGGGGATGATGGTACCCTAGAGAAAAGTACCGGCAAACCTTCGT  
GCCAGCAGCCGCGTAATACGAAGGGTACAAGCGTTATTTCGGAGTTACTGGGCGTAAAGA  
CGGTGTAGGCGGCTTGTTAAGTTGGATGTTAAATTCCTCCGGCCTAACCGGGGATGTGCAT



CCGAAACTGGCGAGCTAGAGTGCAAGAGAGAGAAGTAGAATTCCTGGAGTAGCGGTAAAA  
TGCGTAGATCTCGGGAGGAATACCGATGGCGAAGGCAGCTTCTTGGCTTGTAAGTGACGC  
TAAAGCGCGAAAGCGTGGGGAGCAAACAGGATTAGATACCCAGTAGTCC

>Otu13308

CCAGCTACGGGTGGCTGCAGTGAGGAATTTTCCGCAATGGGCGAAAGCCTGACGGAGCGA  
CGCCGCGTGTGGGATGAAGGCCTTCGGGTCGTAAACCACTGTCTGAAGGGGACTATACTGA  
AGGTACCCCTTGAGGAAGCCCCGGCTAACTACGTGCCAGCAGCCGCGGTAAAGACGTAGGG  
GGCAAGCGTTATTCGGAATTATTTGGGCGTAAAGCGCTCGTAGGCGGATGAGCAAGTTCGT  
GAAGAAAGACCCGGGCTCAGCTCGGGGAACGGCACGAATACTGCTCGTCTTGAGGCAATC  
AGAGGGTGATGGAATTCCTGGTGTAGCGGTGAAATGCGTAGATATCGGGAGGAACACCAG  
TGGCGAAGGCGATCACCTGGGGTTGTTCTGACGCTGAGGAGCGAAAGCTGGGGGAGCAAA  
CGGGATTAGAAACCCGCGTAGTCC

>Otu13310

CCAGCCTATGGGTGGCAGCAGTCGAGAATATTTTCGCAATGGGCGCAAGCCTGACGAAGCG  
ACGCCGTGTGAGCGATGAAGGCCTTAGGGTCGTAAAGCTCTTTTCGCCTAAGAACAAGAGA  
AGATAGTGAATAGCTGTCTGGATTTGAGCGTACTAGGTAAAGAAGCACCCGGCTAACTCCGT  
GCCAGCAGCTGCGGTAATACGGAGGGTGCAAGCATTAAATCGGATTTATTGGGCGTAAAGG  
GGGCGTAGGCGGATCAGCAAGCCAGATGTGAAATCCCGAGGCTCAACCTCGGAACAGCAT  
TTGGTACTACTAATCTAGAGGGTAGACGGAGAAAACGGAATTCACATGTAGCGGTGAAA  
TGCGTAGATATGTGGAAGAACACCGGTGGCGAAAGCGGTTTTCTAGTTTATTCCTGACGC  
TGAGGCCCCGAAAGCTAGGGGAGCAAACAGGATTAGAAACCCCGTAGTCC

>Otu13321

CCAGCCTATGGGTGCGCAGCAGGGAATATTGGTAATGTGCGAAAGCGCGAACCAGCAACGC  
CGCGTGACGATGAAGGCCTTCGGGTGTAAAGTGCTTTTAGAGAGGATGAGGAAGGACA  
GTACTCTCTGAATAAGCCTCGGCTAACTACGTGCCAGCAGCCGCGGTAAAACGTAGGAGG  
CAAGCGTTATCCGATTTACTGGGCGTAAAGCGCGTGTAGGTGGTTTTGTAAAGCCCGGCG  
TGGAAGCCACGGCTCAACCGTGGGATTGCGTTGGGAACTGCGAGGCTTGAATCATGGAG  
AGGGAGCTAGAAATTCCTGGTGTAGGGGTGAAATCTGTAGAGATCAGGAAGAATACCAGTG  
GCGAAGGCGAGCTCCTGGCCAATGATTGACGCTGAGGCGCGAAAGCGTGGGGAGCAAACA  
GGATTAGAAACCCGAGTAGTCC

>Otu13324

CCAGCCTATGGGGGGCTGCAGTCAAGAACATTTGGCAATGGGCGAAAGCCTGACCATGCG  
ACGCCGCGTGCTGGACGAAGTCCTTCGGGACGTAAACAGCTTTTATGGGGGAAGAAGTAA  
TTGACATTACCCCATGAATAAGGGGCTCCTAACTCTGTGCCAGCAGGAGCGGTAATACAG  
AGGCCCCGAGCATTATCCGGAATCACTGGGCGTAAAGGGTGTGTAGGCGGTCTGTAGT  
CTTTTGTAAAAGATCTCGGGCTTAACCCGGGAGATGCGGAGGAAACGGCACGACTCAGAG  
GACGCGAGAGGTAGAGGGAACCATGGTGTAGGGGTGAAATCCGTTGATATCATGGGGAA  
CACCAAATGCGAAGGCACTCTACTGGCGCGCTCCTGACGCTGAAACACGAAAGCGTGGGT  
AGCGAATGGGATTAGAGACCCGTGTAGTCC

>Otu13336

GGACTACAAGGGTATCTAATCCGGTTCGCTCCCCCAGCTTTCATCCCTCACCGTCGGGCG  
CGTTCTAGCAGACAGCCTTCGCCACTGGTGGTCTTCCCGGGATTATAGGATTTACCCCT  
ACCCCGGAAATACCGTCTGCCCTCTCTCGTCCCCTAGCCAAGCAGTATCCCCCGCAATCCA  
ACGATTAATTCGGTGGATTTAACAGGGGACTAATCCAGCCAGCTACGGATGCTTTAGGCC  
CAATAAACATCCACACCACTCGGAGAGCTGGTATTACCGCGGCGGCTGACACCAGACTTG  
CCCTCTCCTTATTCCTCCAGCGTTCTAGACTGGGTAAAAGCCTTCTCAGCGGATGGCAC  
TCGGGATAGCCCTGTCAAGCTTTCGCTTATTGCAAAGTTTCGCGACTGCAGCCCCCAT  
AGGCTGG

>Otu13343

CCAGCCTATGGGTGGCACCAGCTAAGAATATTCGCAATGGACGAAAGTCTGACGGAGCG  
ACGCCGCGTGATGACGAAGGCCGAAAGGTGTAAAGTCCTTTTGTGGGGAAGAATAAG  
CATGGGAGGGAATGCCCGTGTGATGACATGAACCGACGAATAAGCCCCGGCTAACTACGT  
GCCAGCAGCCGCGGTAACACGTAGGGGGCGAGCGTTGTTTCGGAATTACTGGGCGTAAAGG  
GCATGTAGGCGGCTTTGTAAAGTCCGGCGTGGAAGCCACGGCTCAACCGTGGGATTGCGC  
TGGAAGTGTGCGGAGCTTGAATCATGGAGAGGGAGCTAGAATTCCTGGTGTAGGGGTGAAA  
TCTGTAGATATGCGGAAGAATACCTGTGGCGAAGGCGAGTTTCTGGTCTATAACTGACGC  
TGAAATGCGAAAGTGTGGGTAGCAAACAGGATTAGAAACCCAGTAGTCC

>Otu13345

GGACTACAAGGGTTTCTAATCCTGTTTGCTACCCACGCTTTCGTGTCTCAGCGTCAGTCG  
CGGTCCAGAGAGCCGTCTACACCGCCGGTGTTCCCTCCTGATATCTACGCATTTACCCGCT  
ACACCAGGAATTCCACTCTCCTCTCCCGCACTCTAGTCGCTCAGTATTCGGCGCACCCCTC  
CCGGTTGAGCCGGGAGATTTACACCAAACCTAAACAACCGCCTACACACCCTTTACGCC  
CAGTAACTCCGAACAACGCTCGCTGCCTACGTATTACCGCGGCTGCTGGCACGTAGTTAG  
CCGCAGCTGCTTCTGCAGGTACCGTCATCGTCTTCCCTGCCGAAAGAGCTTTACACCCCG  
AGGGGCTTCATCGCTCACGCGGCGTCGCTGCATCAGGGTTTCCCCCATTTGTGCAAGATTC  
CCCACTGCAGCGACCCGTAGGCTGG

>Otu13351

CCCTATGGGAGGCAGCAGCTAAGAATCTTCCGCAATGGGCGAAAGCCTGACGGAGCGATG  
CCGCGTGATCGATGAAGGTCGAGAGATTGTAAAGATCTTTTCCACATGAGGAATAACCAT  
CGGAGGGAATGCCGGTGGGATGACGTTAGTGTGGGAATAAGCCCCGGCTAATTACGTGCC  
AGCAGCCGCGGTAACACGTAAGGGGCGAGCGTTGTTCCGGAATTATTGGGCGTAAAGGGCA  
CGCAGGCGGTTCTGCAAGTCTGATGTGAAAACCTCCGGGCTCAACTCGGAATGCGCGTTGG  
AAACTGTAGGACTAGAGTATTAGAGGGGGAGTCGGAATTCCTAGTGTAGGGGTGAAATCT  
GTTGATATTAGGAAGAACACCGGTGGCGAAGGCGGACTCCTGGCTGGATACTGACGCTGA  
GGTGCGAAGCATAGGGAGCGAACAGGATTAGAGACCCCTCGTAGTCC

>Otu13367

CCAGCCTACGGGTGGCAGCAGTCGAGAATCATTCGCAATGGGCGCAAGCCTGACGATGCG  
ACGCCGTGTGACGATGAAGGCCTTCGGGTGTAAAGTCTTTTCGCCTGGGAACAAGAGA  
TACGTAGTAATACTGCGTAAATTTGAGGGTACCAGGTAAAGAAGCACCGGCTAACTCCGT  
GCCAGCAGCTGCGGTAATACGGAGGGTGCAAGCGTTAATCGGATTTATTGGGCGTAAAGG  
GGGCGTAGGCTGGGACGAAAGTCAGACGTGAAATTCGGGGCTCAACTCCGGACCTGCAT  
CTGAAACTTCATCTCTAGAGGTTAGACGGAGAAAACGGAATTCACAAGTAGCGGTGAAA  
TGCGTAGATATGTGGAAGAACACCGGTGGCGAAGGCGGTTTTCTAGTTTATACCTGACGC  
TGAGGCCCGAAAGCGAGGGGAGCAAACAGGATTAGATACCCGGGTAGTCC

>Otu13403

CCAGCCTATGGGATGCTGCAGTCGAGAATCATTCGCAATGGGCGCAAGCCTGACGATGCG  
ACGCCGCGTGAGCGATGAAGGCCTTCGGGTGTAAAGTCTTTTCGCCTGGGAACAAGGAA  
AGCTGGCGAATACCCAGTGACTTGAGGGTACCAGGTAAAGAAGCACCGGCTAACTCCGTG  
CCAGCAGCTGCGGTAATACGGAGGGTGCAAGCATTAAATCGGATTTATTGGGCGTAAAGG  
CGCGTAGGCGGGAAGGTAAGTCAAATGTGAAAGCCCGGGGCTCAACCTCGGAGCCGCATG  
TGAAACTGCCTTTCTTGAGGGTAGGCGGAGAAAACGGAATTCACAAGTAGCGGTGAAAT  
GCGTAGATATGTGGAAGAACACCGGTGGCGAAGGCGGTTTTCTAGCTTATTCCTGACGCT  
GAGGCGCGAAAGCAAGGGGAGCAAACAGGATTAGAAACCCTGGTAGTCC

>Otu13412

CCAGCCTATGGGGGGCTGCAGTGGGGAATCTTGACACAATGGAGGAAACTCTGATGCAGCG  
ACGCCGCGTGAGCGATGAAGCCCTTCGGGTGTAAAGTCTTTTCGGCAGGGAAGATTATG  
ACGGTACCTGCAGAAGCAGCTGCGGCTAACTACGTGCCAGCAGCCGCGGTAATACGTAGG  
CAGCAAGCGTTGTTTCGGAGTTACTGGGCGTAAAGGGTATGTAGGCGGTTGCCTAAGTTTG  
GTGTGAAATCTCCCGGCTTAACCGGGAGGGTGCGCCGAAAACCTGGGTGACTAGAGTATGG  
GATGGGTAAAGTGGAATTCCTGGTGTAGCGGTGAAATGCGTAGATATCAGGAGGAACATCC  
GAGGCGAAAGCGGCTCGCTGGATCGCAACTGACGCTGAGGGACGAAAGCTAGGGGAGCAA  
ACAGAATTAGAGACCCCAGTAGTCC

>Otu13421

CCAGCCTACGGGTCGCTCCAGTGGGGAATATTGCACAATGGACGAAAGTCTGATGCAGCG  
ACGCCGCGTGAGGATGAAGGTTTTTCGGATTGTAAACTCCTGTTGAGTGGAAGAAAGAC  
CTCTACCTAATACGTAGAGGGGATGACGGTACCCTAGAGAAAGCACCGGCAAACCTTCGT  
GCCAGCAGCCGCGGTAATACGAAGGGTGCAAGCGTTATTCGGAGTTACTGGGCGTAAAGA  
GCGCGTAGGCGGTTTTTTAAGTCATGTGTAAATCTCCCGGCTTAACCGGGAACATGCAT  
GTGATACTGGGAAACTAGAGTATAAGAGAGAGAAGCGGAATTCCTCGGAGTAGCGGTAAAA  
TGCGTAGATCTCGAGAGGAACACCGGAAGCGAAGGCGGCTTCTTGGCTTATAACTGACGC  
TGATGCACGAAAGCTAGGGGAGCAAACAGGATTAGAAACCCAGTAGTCC

>Otu13431

CCAGCCTACGGGTTGCAGCAGTAGGGAATATTGGGCAATGGGCGAAAGCCTGACCCAGCC  
ATGCCGCGTGAAAGGATGAAGGTCCACAGGATTGTAAACTTCTTTTATCAGGGAATAAGGC  
AGATGTAACCTCATCTGATTGAAGGTACCTGGGGAATAAGCACCGGCTAACTTCGTGCCAG  
CAGCCGCGGTAATACAGAGGTCTCAAGCGTTGTTTCGGATTCAATTGGGCGTAAAGGGTGCG

TAGGCGGCGAAGCAAGTCAGATGTGAAATCCCGGGGCTCAACCCCGGAACTGCATTTGAT  
ACTGCTTTTGCTCGAGGACTGGAGAGGAGATCGGAATTCACGGTGTAGCAGTGAAATGCGT  
AGATATCGTGAGGAAGGCCAGTGGCGAAGGCGGATCTCTGGACAGTTCCTGACGCTGAGG  
CACGAAGGCCAGGGGAGCAAACGGGATTAGAAACCCTTGTAGTCC

>Otu13440

CCAGCCTATGGGAGGCTGCAGTAAGGAATATTGGTCAACGGGCGGAAGCCTGAACCAGCC  
ATGCCGCGTGAGGATGAAGGCCCTCTGGGTTGTAACTTCTTTTATTGGGGAAGAAACC  
GGTTTTTTCTAAAGCCGTTGACGGTACCCATTGAATAAGCACCGGCTAACTCCGTGCCAG  
CAGCCGCGTAATACGGAGGGTGCAAGCGTTATCCGGATTCACTGGGTTTAAAGGGTGCG  
TAGGTGGACAGGTAAGTCAGTGGTGAATCTCTAAGCTTAACTTAGAAACTGCCGTTGAT  
ACTATCTGCCTTGAATTTAGTGGAGGTGAGCGGAATATGTCATGTAGCGGTGAAATGCTT  
AGATATGACATAGAACACCCATTGCGAAGGCAGCTCGCTACACTACGATTGACACTGAGG  
CACGAAAGCGTGGGGATCAAACAGGATTAGAAACCCTCGTAGTCC

>Otu13457

CCAGCCTACGGGAGGCAGCAGTAGGGAATCTAGTGCAATGGGCGAAAGCCTGACGCAGCC  
ATGCCGCGTGAATGATGAAGGTCTTAGGATTGTAAATTCCTTTCAGCGGGGACGATAATG  
ACGGTACCCGCGAGAAGAAGCCCCGGCTAACTTCGTGCCAGCAGCCGCGGTAATACGAAGG  
GGGCTAGCGTTGCTCGGAATTACTGGGCGTAAAGCGCGCGTAGACGGTTTTGTAAAGTCAG  
ATGTGAAATCCCCGGGCTCAACCTGGGAACTGCATTTGAGACTGCATGGCTAGAGTATCG  
AAGAGGGAAGTGGAATTTCCGGTGTAGCGGTGAAATGCGTAGATATCGGAAGGTACACCA  
GTGGCGAAAGCGACTTCCTGGTCAATACTGACGTTTCATGTGCGAAAGCGTGGGGAGCAA  
ACAGGATTAGAAACCCGAGTAGTCC

>Otu13458

CCAGCCTACGGGATGCAGCAGTGGGGAATCTTGCACAATGGGGGCAACCCTGATGCAGCG  
ACGCCGCGTGAACGATGAAGCCCTTCGGGGCGTAAAGCTCTTTCGGAAGGGACGAAACCG  
GTCCGGGATAATAAACCGGGCTCTTGACGGTACCTTAGGAAGAAGCACCGGCTAACTCTG  
TGCCAGCAGCCGCGGTAATACAGAGGGTGCAAGCGTTGTTTCGGAATTATTGGGCGTAAAG  
CGCGTGTAGGCGGCAAGGCATGTCCGGTGTGAAAGCCCTCGGCTTAACCGAGGAAGTGCG  
CCCGAAACTATCTTGCTTGAGTTTCGGAGGGGATGGCGGAACTCCCGGTGTAGAGGTGAA  
ATTCGTAGATATCGGGAAGAACACCAGTGGCGAAGGCGGCCATCTGGACGAAAACTGACG  
CTGAGACGCGAAAGCGTGGGGAGCAAACAGGATTAGAAACCCTTGTAGTCC

>Otu13474

CCAGCCTATGGGGGGCTGCAGTTGGGAATCTTGCACAATGGGGGAAACCCTGATGCAGCG  
ACGCCGCGTGAGGACGAAGGGTCTAGGCCTGTAACTCCTTTTTTTCGGGAAGACTTAG  
GACGGTACCCGAAGAATAAGGACCGGCTAACTACGTGCCAGCAGCCGCGGTAAGACGTAG  
GGTCCAAGCGTTGTCCGGATTTACTGGGCGTAAAGAGCGCGTAGGCGGTCTGTTAAGTGT  
AGAGTGAAATCTCTGGGCTCACCCAGAACTGCTCTGCATACTGGCAGACTTGAGGGAT  
GCAGAGGTTTATGGAATTCCTGGTGTAGCGGTGAAATGCGTTGATATCAGGAGGAACACC  
CATGGCGAAGGCAGCAAACCTGGGCATCATCTGACGCTGAGGCGCGAAAGCGTGGGTAGCA  
AACAGGATTAGATACCCGCGTAGTCC

>Otu13475

CCAGCCTATGGGTGGCAGCAGTGACAAAGGCTACTAAATGTTATGCTCTCTGGCCGGAAA  
AACAGGAAGCAATAAAAATTAAAAATAAAGAAATTAATAATTTTATTAAAAAACAAAAAA  
CAAAAAACACACAAGGGATTGTAGAAAGACAAAAATTACTGTTTTTTTAGAGATTTTTT  
CAAACAATTTTTTTAATGCGCTTAGGGGCCAAGTGCATGATTACATGACCAAATGCATGA  
TTACATGACTAAGTGCAAAATTAGCGAATTGGGTATTATGTGAAGAATTGATGAGGTTG  
ATTGAATAATTGTAATATAGACGTTTAAGGGTTAACCCCATCGATGTCCAATAAGGGT  
TCCCTATGTATACTACATCAACCATAATAGTTATGTAGTGCAGTTGACCTTGGATATTAG  
AGACCCGAGTAGTCC

>Otu13477

CCAGCCTATGGGATGCTGCAGTAGGGAATCTTCCACAATGGGCGAAAGCCTGATGGAGCA  
ACGCCGCGTGAGGATGAAGGTCTTCGGATTGTAACTGCTTTTATATGCGACGATTATG  
ACGGTAGCATATGAATAAGGATCGGCTAACTCCGTGCCAGCAGCCGCGGTCATACGGAGG  
ATCCAAGCGTTATCCGGAATTACTGGGCGTAAAGAGTTGCGTAGGTGGCAGCGTAAGCAA  
GTAGTGAAATTCTGGGGCTCAACCCCTTGTTCCATTACTTGAAGTGCAGCTAGAGGATG  
AGAGAGGTTATTGGAATTCCTAGTGTAGGAGTGAAATCCGTAGATATTAGGAGGAACACC  
GATGGCGTAGGCAGATAACTGGCTCATTCCTGACACTAAGGCACGAAAGCATGGGTAAACA  
AACGGGATTAGATACCCAGTAGTCC

>Otu13482

CCAGCCTACGGGACGCACCAGTGGGGAATCTTGACAAATGGGGGCAACCCTGATGCAGCG  
ACGCCGCGTGAGCGATGAAGCCCTTCGGGGTGTAAGCTCTTTCGGCAGGGAAGATAATG  
ACGGTACCTGCAGAAGCAGCTGCGGCTAACTACGTGCCAGCAGCCGCGTAATACGTAGG  
CAGCAAGCGTTGTTTCGGAGTTACTGGGCGTAAAGGGTGTGTAGGCGGCTTCTAAGTTTG  
TTGTGAAATCTCCCGGCTTAACCGGGAGGGTGCGGCGAAGACTGGAAGGCTAGAGTATGG  
GATGGGAGAGTGGAATTCCTGGTGTAGCGGTGAAATGCGTAGATATCAGGAGGAACACCA  
ATGGCGAAGGCAGCTCGCTGGGACGTGACTGACGCTGAGACGCGAAAGCGTGGGGAGCAA  
ACAGGATTAGATACCCTGGTAGTCC

>Otu13489

CCAGCCTACGGGATGCACCAGTCGAGAATTTTTTCAAAATGGGCGCAAGCCTGATGGAGCG  
ACGCCGCGTGGGGGATGAAGGGCTTCGGCTCGTAAACCCCTGTCATTCTGTGAACAAAGCC  
TGGGGGTAAACAGCCTTCAGGGTGATAGTAACGGAAGAGGAAGGGACGGCTAACTCTGTG  
CCAGCAGCCGCGTAATACAGAGGTCCCGAGCGTTGTTTCGGATTTACTGGGCGTAAAGGG  
TGCGTAGGCGGCCGGGTAAAGTCCAGCGTGAAATCTCCAAGCTTAACTTGGAAGGGCGCT  
GGAACTATCAGGCTCGAGTGCCGGAGAGGAGACTGGAATTCTCGGTGTAGCAGTGAAAT  
GCGTAGATATCGAGAGGAACACCAGTGGCGAAGGCGGGTCTCTGGACGGATACTGACGCT  
GAGGCACGAAAGCCAGGGGAGCAAACGGGATTAGATACCCGAGTAGTCC

>Otu13507

CCAGCCTACGGGTTCGAGCAGTCGAGAATCTTCGGCAATGGGCGCAAGCCTGACCGAGCG  
ACGCCGCGTGAGGATGAAGGCCCTTCGGGTGTAACTCCTGTGCGAGGGGAGCAAGGGC  
CGGCGAAGAGCCGCTCTTGACCGATCCTGGGAGGAAGCACGGGCTAAGTTCGTGCCAGCA  
GCCGCGGTAAGACGAACCGTGCGAACGTTATTCGGAATCACTGGGCTTAAAGCGCGTGTA  
GGCGGGTTCGACGCATCGGTGTTGAAATCCCCCGGCTCAACCGGGGAACCTGGCGCCGAGA  
TGGTCGATCTGGAGGGGAGCAGGGGGACCTGGAATTCCGGTGGAGCGGTGAAATGCGTT  
GAGATCGGAAGGAACGCCCGTGGCGAAAGCGAGGTCTTGGACTTTTTCTGACGCTGAGAC  
GCGAAAGCTAGGGGAGCAAACGGGATTAGAGACCCGCGTAGTCC

>Otu13514

CCAGCCTACGGGTGGCAGCAGTGAGGAATCTTGCGCAATGGGCGAAAGCCTGACGCAGCG  
ACGCCGCGTGAGGATGACGGTCTTCGGATTGTAACTCCTGTAAAGTGGGAAGAAAAGC  
CTGTTTTTAATAGAAACAGGTAATGACGGTACCATTAGAGAAAGCACCGGCTAACTTCGT  
GCCAGCAGCCGCGTAATACGAGGGGTGCTAGCGTTATTCGGAATTATTGGGCGTAAAGG  
GTGCGTAGGTGGCGCGCTAAGTCAACTGTAAATTCCTCGGCCTAACCGAGGATCTGCGG  
TAGATACTGGCGAGCTAGAGGGTGGAAAGAGAGAAGTGGAAATTCCTCGGAGTAGCGGTAAAA  
TGCGTAGATCTCGAGAGGAACACCAATGGCGAAGGCAGCTTCTTGGTCCATACCTGACAC  
TGAGGCACGAAAGCTAGGGGAGCAAACAGGATTAGATACCCCTGTAGTCC

>Otu13534

CCAGCCTATGGGGGGCTGCAGTAAGGAATATTGGACAATGGTGGCAACACTGATCCAGCC  
ATGCCGCGTGAGGATGAAGGCGCTACGCGTTGTAACTGCTTTTGTACCAGAGAAAACC  
TATCTACGTGTAGATAGCTGATAGTATGGTAAGAATAAGCATCGGCTAACTTCGTGCCAG  
CAGCCGCGGTAATACGAAGGATGCAAGCGTTATCCGGATTTATTGGGTTTAAAGGGTGCG  
TAGGCGGGTTTGTAAAGTCAGCGGTGAAAGACTGTCGCTTAACGATAGCATTGCCATTGAT  
ACTGCAGATCTTGAGTACAGTTGAGGTAGGCGGAATGTGTAGTGTAGCGGTGAAATGCTT  
AGATATGACACAGAACACCGATTGCGAAGGCAGCTGACGAAACTGTAAGTACGCTGAGG  
CACGAAAGCGTGGGGATCAAACAGGATTAGATACCCCGGTAGTCC

>Otu13537

CCAGCCTATGGGTGGCAGCAGTAAGGAATATTGGTCAATGGACGCAAGTCTGAACCAGCC  
ATGCCGCGTGAGGATGACAGCCCTACGGGTGTAACTTCTTTTGTACGGGAAAAAACC  
CCTGGTCGTGAACCAGGGCTGATGGTACCGTAAGAATAAGCATCGGCTAACTCCGTGCCA  
GCAGCCGCGGTAATACGGAGGATGCAAGCGTTATCCGGATTCATTGGGTTTAAAGGGTGC  
GCAGGCGGAATGATAAGTCAGTGGTGAATCCTACAGCTCAACTGTAGAACTGCCATTGA  
TACTATCGTTCTTGAGTACATTTGAAGTGGGCGGAATGTGTATGTAGCGGTGAAATGCT  
TAGATATGACACAGGACACCGATTGCGAAGGCAGCTTACTGGGCCATTACTGACGCTGAT  
GCACGAAAGCGTGGGGAGCGAACAGGATTAGAAACCCTAGTAGTCC

>Otu13541

CCAGCCTATGGGGTGCTGCAGCTAAGAATATTCCGCAATGGACGAAACTCTGATGCAGCG  
ACGCCGCGTGAGTGACGAAGGCCCTTCGGGTGTGAAGCTCTGTTCTCAGGGAAAAAGAAA  
GTGATTGTACCTGAGGAGAAAGGACCGGCTAACTTCGTGCCAGCAGCCGCGTAAGACGA

GGGGTCCAAGCGTTGTTTCGGAATCATTGGGCGTAAAGCGGGTGTAGGTGGCTCTGTAAAGT  
CAGGAGTGAAATCCCCAAGCTTAACTTGGGAAGTGCTTTTGAAACTGCAGAGCTTGAGTG  
TGGGAGAGGATCGTGGAATTCAGGTGTAGTGGTGAAATACGTAGATATCTGGAGGAACA  
CCGGTGGCGAAGGCGGCGATCTGGCCCAACACTGACACTGAGACCCGAAAGCGTGGGGAT  
CAAACAGGATTAGAGACCCGTGTAGTCC

>Otu13542

CAGCCTACGGGGTGCACCAGGCGCGAAAACTTTACAATGCGGGAAACCGTGATAGGGGAA  
CTCTGAGTGCCCGTTAAATCGGGCTGTCCATCAGTTTAAATAACTGGTGAAGAAAGGGCC  
GGGCAAGACCGGTGCCAGCCGCCGCGTAATACCGGCGGCTCGAGTGGTGGCCGCTATTA  
TTGGGCTTAAAGGGTCCGTAGCTGGATTACAAGTCCCTTGAGAAATCCATCGGCTTAAC  
TGCTGGGCGTTTCAGGGGATACTGTGGTTCTAGGGACCGGGAGAGGTGAGAGGTACTGCCG  
GGGTAGGAGTGAAATCCTGTAATCCCGGTGGGACCACCTATGGCGAAGGCATCTCACCAG  
AACGGCTCCGACAGTGAGGGGCGAAAGCTGGGGGAGCAAACCGGATTAGATACCCTCGTA  
GTCC

>Otu13549

CCAGCCTACGGGTGCGACCAGTGGGGAATCTTGCGCAATGGGCGAAAGCCTGACGCAGCG  
ACGCCGCGATGGGGGATGAAGCTTCTCGGAGTGTAACCCCTTTTCGACTGGGACGAATGCC  
TCGCAAGAGGAGTGACGGTACCAGTAGAAGAAGCCCCGGCTAACTACGTGCCAGCAGCCG  
CGGTAATACGAAGGGGGCTAGCGTTGTTTCGGAATTACTGGGCGTAAAGCGCGTGTAGCG  
GGTCTTTAAGTCAGGGGTGAAATGCCAAGGCTCAACCTTGGAAGTGCCTTTGATACTGGA  
GATCTTGAGTCCGGGAGAGGTGAGTGGAACTGCGAGTGTAAGGTGAAATTCGTAGATAT  
TCGCAAGAACACCAAGTGGCGAAGGCGGCTCACTGGCCAGAACTGACGCTGAGACGCGAA  
AGCGTGGGGAGCAAACAGGATTAGATACCCTCGTAGTCC

>Otu13550

CAGCCTACGGGTGGCTGCAGTCGAGAATTTTTTCAATGGGGGAAACCCCTGATGGAGCGA  
CGCCGCGTGGGGGATGAATGGCTTCGGCCCCGTAAACCCCTGTCATTTGCGAACAAAGTTG  
GCGCATGAACAAATGCGTTAATTGATTGTAGCGAAAGAGGAAGGGACGGCTAACTCTGTGC  
CAGCAGCCGCGGTAATACAGAGGTCCCAAGCGTTGTTTCGGATTCACTGGGCGTAAAGGGT  
GCGTAGGTGGCCGGGTAAAGTCTGATGTGAAATCTCGGAGCTCAACTCCGAAACGGCATTG  
GATACTCTCCGGCTGGAGGGTTCGGAGGGGGGACTGGAATTCTCGGTGTAGCAGTGAAATG  
CGTAGATATCGAGAGGAACACCAAGTGGCGAAGGCGAGTCCCTAGACAATTCCTGACACTG  
AGGCACGAAAGCCAGGGGAGCAAACGGGATTAGATACCCGAGTAGTCC

>Otu13553

CCAGCCTACGGGTGCTCCAGTCAAGAATCATGGTCAATGCGCGACAGCGTGAACCTGCG  
ACCTGTGAGAAGTGAAGACGGCATTGGTCTTAAATCTTTGTAGGTTGGTTCCATCATGAG  
GGGCCAGCCGTACAGTCGTGATTAATCCTTGTGCCAGCAATAGCGGTCATACAAGAGCGG  
CGAATGTTGCTCGATGGAATTCGGTGTAAAACGTGGGTAGGCGGTGGAACCCAAACAAGAC  
TTTGAAGCAAGAGGGGACACTCCGGAACGGGTCTTGTTGCTCGACTCGAGATGAGACGGG  
GAAAACGGAATGATGGGAGAACGGTTAGAATCGGTGATCCCCATTGGAACGTGAGAGGC  
GAAGGCGGTTTTCTGGGCTCAATCTGACGCTGATGTACGAAAGCTGGGGGAGCAAATCG  
GATTAGATACCCGCGTAGTCC

>Otu13554

CCAGCCTACGGGGGGCACCAGTCGCGAATCTTTTGCAATGCGCGCAAGCGTGACAAAGCG  
AGCCAAAGTGCTTTTTCATTTTAGAAAAGCTTTTTTTCATTTTAAAAAGATGGAAGAATAA  
GGACTGGGCAAGACCGGTGCCAGCCGCCGCGTAATCCCGGCAGTCCAAGTTGCAGCCAA  
CTTTATTGGGTCTAAACATCCGTAGCTTGTCTGTTAAGTTCCTTGTAATCCCTCATC  
TTAAGTGTGGGGCTTGCGGGGAATACTGGCAGACTCGGGACCGGTAGATGTGGGGAGTAC  
ACTGGAGGTAGTGGTAAAATACGTTAATCTTCAGTGGACTAACAATGAGCGAAGGCACCC  
TACAAGGACGGATCTGACAGTGAGGGATGAAGGCCAGGGGCGCAAACGGATTAGATACC  
CCAGTAGTCC

>Otu13563

CCAGCCTATGGGAGGCAGCAGTCGAGAATTTTTCTCAATGGGGGAAACCCCTGAAGGAGCG  
ACGCCGCGTGAAGGATGAAGGTCTTCGGATCGTAAACTTCTGTTCATTAGAGAACAATTCG  
CCGGGGAGTAACTGCCTCGGCGTTGATAGTATCTGAAGAGGAAGGGACGGCTAACTCTGT  
GCCAGCAGCCGCGTAATACAGAGGTCCCAAGCGTTGTTTCGGATTCAATTGGGCGTAAAGG  
GTGCGTAGGTGGTGCCGTAAGTCGGATGTGAAATCCCGGAGCTTAACTCCGGAAGTGCAT  
TCGATACTGCGGTGCTGGAGGACTGGAGAGGAGATCGGAATTCACGGTGTAGCAGTGAAA  
TGCGTAGATATCGTGAGGAAGACCAAGTGGCGAAGGCGGATCTCTGGACAGTTCCTGACAC

TGAGGCACGAAGGCCAGGGGAGCAAACGGGATTAGATACCCCCGTAGTCC

>Otu13564

CCAGCCTACGGGAGGCTGCAGTGGGGAATCTTGCGCAATGGGCGAAAGCCTGACGCAGCG  
ACGCCGCGTGAGTGATGAAGGCCTTCGGGTGTAAAGCTCTGTGGGGAGAGAAGAATTAG  
TGCAGGCTAATCACTGCACGATGACGGTATCTCCTTAGCAAGCACCGGCTAACTCTGTGC  
CAGCAGCCGCGGTAAGACAGAGGGTGCAAACGTTGTTTCGGAATTACTGGGCGTAAAGCGT  
GTGTAGGCTGCTATGCAAGTCGGGTGTGAAATCCCTGGGCTCAACCCAGGAAGTGCACCTC  
GAAACTGCATGGCTCGAGTACCGGAGAGGTTGGTAGAATTCTCGGTGTAGAGGTGAAATT  
CGTAGATAGCGAGAGGAATACCTGTGGCGAAGGCGGCCAACTGGACGAGTACTGACGCTG  
AGACACGAGAGCGTGGGGAGCAAACAGGATTAGAAACCCCTGTAGTCT

>Otu13568

CCAGCCTATGGGTTGCAGCAGTTTGTAGAAATTTGCGCAATGGGCGAAAGTCTGACGATGCG  
ACGCCGCGTGAACGATGAAGGCCTTCGGGTGTAAAGTCTGTGTCTGGAACAAGAGT  
GGTTGACGAATAGTTGATCACGATGAGGGTACAGGAAGAGGAAGCACCGGCTAATTCCGT  
GCCAGCAGCTGCGGTAATACGGAAGGTGCAAGCGTTAGTCGGAATTACTGGGCGTAAAGG  
GTGCGTAGGCGGAGATGTACGTCGGATGTGAAATCCCGGGGCTTAACCCCGGAAGTGCAT  
ACGAAACTGCATCCCTTGGGGAATGGCGGAGAAAATGGAATTCATATGTAGCGGTGAAA  
TGCGTAGATATATGGAAGAACACCTGTGGCGAAAGCGGTTTTCTAGCCTCCTCCCGACGC  
TGAGGCACGAAGCAAGGGGAGCAAACAGGATTAGAGACCCAGTAGTCC

>Otu13575

CCAGCCTACGGGTGGCAGCAGTAAGGAATATTGGACAATGGTGGCAACACTGATCCAGCC  
ATGCCGCGTGACAGGATGAAGGCGCTACGCGTTGTAACTGCTTTTGTACGGGAGAAAACC  
TATCTACGTGTAGATAGCTGATAGTACCGTAAGAATAAGCATCGGCTAACTTCGTGCCGG  
CAGCCGCGGTAATACGAAGGATGCGAGCGTTGTCCGGATCACTGGGTGTAAAGGGAGCG  
CAGGCGGGTTCGGTAAGTCATTGGTGAAATTTTCGGGCTCAACCCGAAGACTGCCACTGAT  
ACTGCCGATCTTGAGTGTGGAAGAGGTTGGTGGAATTCATGGTGTAGCGGTGAAATGCGT  
AGATATCATGAAGAACACCGATGGCGAAGGCAGCCAACCTGGTCCATTACTGACGCTCATG  
CTCGAAAGCGTGGGGATCAAACAGGATTAGATACCCCGGTAGTCC

>Otu13583

CCAGCCTACGGGTGCTCCAGGCGCGAAAACCTTTACAATGCGGGAAACCGTGATAAGGGG  
ACACCGAGTGCCAGCATCATATGCTGGCTGTCCGGGCGTGTAATAACACCTGTTAGCAA  
GGGCCGGGCAAGACCGGTGCCAGCCGCCGCGGTAACACCGGCGGGCCGAGTGGTGATCGT  
GATTATTGGGTCTAAAGGGTCCGTAGCCGGTTTGGTTCAGTCCTCCGGGAAATCTGACGGC  
TTAACCGTTAGGCTTTTCGGGGGATACTGCCAGACTTGGAACCGGGAGAGGTGAGAGGTAC  
TCCAGGGGTAGGAGTGAAATCCTGTAATCCTTGGGGGACCACCTGTGGCGAAGGCGTCTC  
ACCAGAACGGCTCCGACAGTGAGGGACGAAAGCTGGGGGAGCAAACCGGATTAGATACCC  
TAGTAGTCC

>Otu13595

CCAGCCTACGGGGTGCACCAGTGGGGAATTTTGCGCAATGGGGGAAACCCTGACGCAGCA  
ACGCCGCGTGAGTGATGAAGGCCTCCGGGTGCTAAAGCTCTGTGAGAGGGAAAGAAGTGT  
AGGAGGGTTAATACCCCTTTTACTTGACGGTACCCTCAAAGGAAGCACCGGCTAACTCCG  
TGCCAGCAGCCGCGGTAATACGGAGGGTGCAGCGTTGTTTCGGATTTATTGGGCGTAAAG  
CGCGTGTAGGCGGTTTTTTTAAGTCTGATGTGAAAGCCCTGGGCTCAACCCGGGAAGTGCA  
TTGGAAGTGGGAGACTTGAATACGGGAGAGGGTAGTGGAATTCCTGGTGTAGCAGTGAA  
ATGCGTAGATATCAAGTGGAACACCAGTGCGGAAAGCGAGTCCCTGGACAACCTCCTGACA  
CTGAGGCACGAAAGCTAGGGGAGCAAACAGGATTAGAAACCCCGTAGTCC

>Otu13608

CCAGCCTACGGGGTGTGCTGCAGTCGAGAATTTTTCTCAATGGGCGAAAGCCTGAAGGAGCG  
ACGCCGCGTGGGGGATGAATGGCTTCGGCCCGTAAACCCCTGTCATTTGCGAACAAATTG  
TTTACCTAACACGTGAATCATTTGATTGTAGCGGAAGAGGAAGGGACGGCTAACTCTGTG  
CCAGCAGCCGCGGTAATACAGAGGTCCCAAGCGTTGTTTCGGATTCCTGGGCGTAAAGGG  
TGCGTAGGCGGTTCGGTAAGTCTGATGTGAAATCTCGGAGCTCAACTCCGGAACGGCATT  
GGATACTATCCGGCTGGAGGGTCGGAAGGGGGACTGGAATTCCTCGGCGTAGCAGTGAAAT  
GCGTAGATATCGAGAGGAACACCAGCGGCGAAGGCGAGTCCCTGGACGACTCCTGACACT  
GAGGCACGAAAGCTAGGGGAGCAAACAGGATTAGAAACCCCGTAGTCC

>Otu13619

GGACTACCGGGGTCTCTAATCCCGTTTTGCTCCCCTGGCTTTCGTGCCTCAGTGTGAGGAA  
TTGTCTAGGGACTCGCCTTCGCCACTGGTGTTCGCTCGATATCTACGCATTTCACTGCT

ACACCGAGCATTCCAGTCCCCCTCCAATCCTCAAGCTGGATAGTATTCAATGCATTTTC  
CGGGTTAAGCCCGGAGATTTACATCAAACCTACCCAACCACCTACGCACCCTTTACGCC  
CAGTAAATCCGAACAACGCTTGGGACCTCTGTATTACCGCGGCTGCTGGCACAGAGTTAG  
CCGTCCTTCTCTGCCGCTACTATCAATCCCGACAATGTTATTGCCGGGACATTGATCC  
CGAATGACAGGGGTTTACGGGCGGAAGCCATTTCATCCCCACGCGGCGTCGCTCCTTCAG  
GCTTTCGCCCATTGAGAAAAATTCTCGACTGCTGCACCCCGTAGGCTGG

>Otu13629

CCAGCCTATGGGGTGCTGCAGTCGAGAATTTTTCAACAATGGGCGGAAGCCTGATGGAGCG  
ACGCCGCGTGGGGGATGAATGGCTTCGGCCCGTAAACCCCTGTCATTTGCGATCAACCCT  
TACGACCTAACACGTCGTGAGCTGATAGTAGCGAAAGAGGAAGGGACGGCTAACTCTGTG  
CCAGCAGCCGCGGTAATACAGAGGTCCCAAGCGTTGTTTCGGATTCACTGGGCGTAAAGGG  
TGCGTAGGCGGTCGGGTAAGTCTGATGTGAAAGCTCGCGGCTCAACCGCGAAATGGCATC  
GGATACTATCCGGCTGGAGGAATGGAAGGGAGACTGGAATACTTGGTGTAGCAGTGAAAT  
GCGTAGATATCAAGTGGAACACCAGTGGCGAAGGCGAGTCTCTGGACATTTCTCTGACGCT  
GAGGCACGAAAGCCAGGGGAGCAAACGGGATTAGATACCCTAGTAGTCC

>Otu13639

CCAGCCTACGGGTGGCACCACTGGGGAATATTGGACAATGGGCGCAAGCCTGATCCAGCC  
ATGCCGCGTGAGTGAAGAAGGCCTTAGGGTTGTAAAGCTCTTTTGGCGGGGGCGATAATG  
ACGGTACCCGCGAGAATAAGCCCCGGCTAACTTCGTGCCAGCAGCCGCGGTAATACGAAGG  
GGGCTAGCGTTGCTCGGAATGACTGGGCGTAAAGGGCGCGTAGGCGGATGACACAGTCAG  
GCGTGAAATTCCTGGGCTCAACCTGGGGGCTGCGCTTGATACATGTTGTCTAGAGTGTGA  
AAGAGGGTCGTGGAATTCACAGTGTAGAGGTGAAATTCGTAGATATTGGGAAGAACACCG  
GTGGCGAAGGCGGCGACCTGGTTCATTACTGACGCTGAGGCGCGAAAGCGTGGGGAGCAA  
ACAGGATTAGAGACCCTAGTAGTCC

>Otu13643

CCAGCCTACGGGATGCTCCAGTGAGGAATATTGGTCAATGGACGCAAGTCTGAACCAGCC  
ATGCCGCGTGAGGATGAAGGCCTTCTGGGTTGTAAACTTCTTTTACCTGGGAAGAAACC  
CCGATTTTCTAATCGGGTTGACGGTACCAGAGGAATAAGCACCGGCTAACTCCGTGCCAG  
CAGCCGCGGTAATACGGAGGGTGCAAGCGTTATCCGGATTTATTGGGTTTAAAGGGTGCG  
TAGGCGGACTTATAAGTCAGTGGTGAAAACCTTCAGCTTAACTGGAGACTTGCCATTGAT  
ACTGTTAGTCTTGAGTACGGTCAAGGTAGGCGGAATGTGTAATGTAGCGGTGAAATGCTT  
AGATATTACACAGAACACCGATTGCGAAGGCAGCTTACTGGGCCATTACTGACGCTGATG  
CACGAAAGCGTGGGGAGCGAACAGGATTAGAAACCCCAGTAGTCC

>Otu13646

GGACTACTAGGGTTTCTAATCCTGTTTGCTCCCCACGCTTTCGTGCCTCAGCGTCAGTAT  
CGGGCCAGTGAGCCGCCTTCGCCACTGGTGTTCTTGCGAATATCTACGAATTTACCTCT  
ACACTCGCAGTTCACCTCACCCTCTCCCGAACTCAAGATCCTCAGTATCAAAGGCAGTTCT  
GGAGTTGAGCTCCAGGATTTACCCCTGACTTAAAGACCCGCCTACGCACCCTTTACGCC  
CAGTGATTCCGAGCAACGCTAGCCCCCTTCGTATTACCGCGGCTGCTGGCACGAAGTTAG  
CCGGGGCTTATTCTTGCGGTACCGTCATTATCTTCCCGCACAAAAGAGCTTTACAACCCT  
AGGGCCTTCATCACTCACGCGGCATGGCTGGATCAGGCTTGCGCCCATTGTCCAATATTC  
CCCACTGCAGCCCCCGTAGGCTGG

>Otu13652

CCAGCCTACGGGGGGCTGCAGTCGAGAATCTTCTGCAATGGACGAAAGTCTGACAGAACG  
ACGCCGCGTGAGGAAGAGGGCCTTCGGGTTGTAAACTCCTGTACAGGTTATGAAGGGT  
GTTCTGCATAACATGCGGGACTCTCGGACAAAGGCCTGAGAGGAAGCCACGGCTAACTCT  
GTGCCAGCAGCCGCGGTAAGACAGAGGTGGCAAGCGTTGTTTCGGAACCACTGGGCGTAAA  
GGGCGCGTAGGCGGCGATACAAGTCGGGTGTGAAATCCCTCGGCTCAGCCGAGGCATTGC  
TTCCGATACTGTATTGCTAGAGTGCGGGAGGGGAGAGTGGAATCTTGGTGGAGCGGTGA  
AATGCGTAGATATCAGAAGGAACGCCGGAGGCGAAGGCGACTCTCTGGACCGTTACTGAC  
GCTGAGGCGCGAAAGCTAGGGGAGCAAATGGGATTAGATACCCTAGTAGTCC

>Otu13660

CCAGCCTATGGGATGCAGCAGTGGGGAATTTTGCGCAATGGGCGAAAGCCTGACGCAGCA  
ACGCCGCGTGGGTGATGAAGGCTTTCGGATCGTAAACCCCTGTCGTCAGGGACGAAGGGC  
TTGTGCCTAATACGTGCAAGTCTTGACGGTACCTGGAGAGGAAGCCCCGGCTAACTCTGT  
GCCAGCAGCCGCGGTAATACAGAGGGGGCAAGCGTTATTTCGGAATTATTGGGCGTAAAGG  
GCGCGTAGGCGGTGTTTTAAGTGAGATGTGTAATCCCCGAGCTTAACTTGGGAAGTGCCT  
CTCAGACTGGGACGCTAGAGTGCTGGAGAGGGTGGTAGAATTCACGCTGTAGCGGTGAAA

TGCGTAGAGATGTGGAGGAATACCAGTGGCGAAGGCGGCCACCTGGACAGTAACTGGCGC  
TGAGGCGCGAAAAGTGTGGGTAGCAAACAGGATTAGATACCCTAGTAGTCC  
>Otu13665  
CCAGCCTACGGGGGGCACCAGTGGGGAATTTTGC GCAATGGGGGAAACCCTGACGCAGCA  
ACGCCGCGTGAGGATGAAGTACTTCGGTACGTAAACTCCTTTTCGATCGGGAAGATAATG  
ACGGTACCGCAAGAATAAGCCCCGGCTAACTTCGTGCCAGCAGCCACGGTAATACGAAGG  
GGGCTAGCGTTGCTCGGAATCACTGGGCGTAAAGGGTGC GTAGGCGGGTCTTTAAGTCAG  
AGGTGAAATCCTGGAGCTCAACTCCAGAACTGCCTTTGATACTGAGGGTCTTGAGTTCGG  
GAGAGGTGAGTGGAAGTGC GAGTGTAGAGGTGAAATTCGTAGATATTCGCAAGAACACCA  
GTGGCGAAGGCGGCTCACTGGCTCGATACTGACGCTGAGGTGCGAAAGCGTGGGGAGCAA  
ACAGGATTAGATACCCCAGTAGTCC  
>Otu13668  
CCAGCCTATGGGACGCTGCAGTGGGGAATCTTGC GCAATGGGCGAAAGCCTGACGCAGCA  
ACGCCGCGTGAGTGATAAAGGTCTTCGGATCGTAAAGCTCTGTGACAGGAAAGACGGTT  
TGATTGGCCAACATCCAATTGAGCTGACGGTACCTGTAAAGGAAGCACCGGCTAACTCTG  
TGCCAGCAGCCGCGGTAAAGACAGAGGGTGCAAGCGTTGTTTCGGAATTATTGGGCGTAAAG  
GGCGCGTAGGCGGCGTTCGTAAAGTCACGTGTGAAAGCCCAGGGCTTAACCCTGGAAGTGC G  
CGTGAAACTGCGATGCTTGAGTCTCGGAGAGGGTGGTGGAATCCCAGTGTAGAGGTGAA  
ATTCGTAGATATTGGGAGGAATACCGGTGGCGAAGGCGACCACCTGGACGAAGACTGACG  
CTGAGGCGCGAAAGCGTGGGGAGCAAACAGGATTAGATACCCGGGTAGTCC  
>Otu13669  
CCAGCCTATGGGGGGCAGCAGTAAGGAATATTGCTCAATGGCCGAAAGGCTGAAGCAGCA  
ACGCCGCGTGAAAGATGAAGGGATTTTTCTTGTAAACTTCTGTAACGAGGGAAAAAACTT  
CCCCTCTGGGGAAATTGATTGTACCTCGAAAGTAAGCCTCGGCTAACTACGTGCCAGCAG  
CCGCGGTAATACGTAGGAGGCGAGCGTTGTCCGGATTTACTGGGTGTAAAGGGTGCTCAG  
GTGGTTGTGCAAGTCAGGGGTGAAATCCCGGAGCTTAACCTCGGAACTGCCTTTGATACT  
GCTCAGCTTGAATATGGAAGAGGCTGATGGAATTTATGGTGTAGCAGTGAAATGCGTAGA  
TATCATAAAGAACACCAGTGGCGAAGGCGGTCAGCTGGTCCATTATTGACACTAAAGCAC  
GAAAGCGTGGGGAGCAAACAGGATTAGATACCCCTGTAGTCC  
>Otu13676  
CCAGCCTATGGGGGGCTCCAGCTGGGAATCTTCTGCAATACACGCAAGTGTGACAGAGCG  
AGCCAGAGTGCTCCTCATTGAGGAGCTTTTGCTAAATCTAAAAAGTTTGCGCAATAAGGA  
CTGGGCAAGACCGGTGCCAGCCGCCGCGGTAATACCGGCGGTCCAAGTCGCAGCCACTTT  
TATTGGGTCTAAACATCCGTAGCTTGTTTCGGTGAGTTCCTTGTGAAATCCTGTCTCTTA  
AGGTCAGGGCGAGCAAGGAGTACTACCGGGCTAGAGACTGGAAGACGTAAGAAGTACGTT  
TGAAGTAGCGGTTAAATGCTTTAATCTTAGACGGACTCACAACAGCGAAGGCATCTTACG  
AGGACAGTTCTGACAGTGAGGGATGAAGGCCAGGGGCGCAAATGGATTAGATACCCTAG  
TAGTCC  
>Otu13680  
CCAGCCTACGGGGTGCAACCAGTCGAGGATTTTTCTCAATGGGGGAAACCCTGAAGGAGCG  
ACGCCGCGTGGGGGATGAAGGTCTTCGGATTGTAAACCCCTGTCATCTGGGAACAAAGCG  
CTCCACCTAACACGTGGATTGTTGATAGTACCGGAAGAGGAAGCCGTGGCTAACTCTGTG  
CCAGCAGCCGCGGTAATACAGAGACGGCAAGCGTTGTTTCGGATTCAATTGGGCGTAAAGGG  
TGCGCAGGCGGCTCGTTAAGTCGGATGTGAAATCTCACAGCCTAACTGTGATAGGTCATT  
CGAAACTGGCGGGCTCGAGGACTGGAGAGGAGACTGGAATGGTCGGTGTAGCGGTGAAAT  
GCGTAGAGATCGACCAGAACACCGGTGGCGAAGGCGAGTCTCTGGACAGTAACTGACACT  
GAGGCACGAAGGCCAGGGGAGCAAACGGGATTAGATACCCCGGTAGTCC  
>Otu13697  
CCAGCCTACGGGGCGCTGCAGTGAGGAATATTGGGCAATGGACGCAAGTCTGACCCAGCC  
AAGCCGCGTGAAAGATGAAGGCTCTACGAGTCGTAAACTCTTTTATAGAGGAAGAAAAAT  
GCTCTACGTGTAGAGAACTGACTGTACTTTATGAATAAGCATCGGCTAACTCCGTGCCAG  
CAGCCGCGGTAATACGGAGGATGCAGGCGTTATCCGGATTCATTGGGTTTAAAGGGTGCG  
TAGGCGGAATAATAAGTCAGTGGTGAAATACTGCAGCTTAAGTGTAGAACTGCCATTGAT  
ACTGTTATTCTTGAATGCAGTTGAGGTAGGCGGAATGTGTAGTGTAGCGGTGAAATGCTT  
AGATATTACACAGAACACCGATTGCGAAGGCAGCTTACTAAACTGTGATTGACGCTGAGG  
CACGAAAGCGTGGGGATCAAACAGGATTAGAAACCCGGGTAGTCC  
>Otu13702  
CCAGCCTATGGGATGCAGCAGTCGAGAATTTTTCTCAATGGGCGAAAGCCTGAAGGAGCG



ACGCCGCGTGGGGGATGAATGGCTTCGGCCCGTAAACCCCTGTCATTTGTGACCAAACCT  
TTTCATTTAATATGTGAAAAGCTGATGGTAGCGGAAGAGGAAGGGACGGCTAACTCTGTG  
CCAGCAGCCGCGGTAATACAGAGGTCCCAAGCGTTGTTTCGGATTCACTGGGCGTAAAGGG  
TGCGTAGGTGGCGGGATAAGTCTGATGTGAAATCTCGAAGCTTAACCTCGAAACTGCATT  
GGATACTATTCTGCTGGAGGGTTGGAGGGGGGACTGGAATTCTCGGTGTAGCAGTGAAT  
GCGTAGATATCGAGAGGAACACCAGTGGCGAAGGCGAGTCCCTGGGCAACTCCTGACACT  
GAGGCACGAAAGCTAGGGGAGCAAACAGGATTAGATACCCCAGTAGTCC

>Otu13703

CCAGCCTACGGGTGGCTGCAGTGGGGAATCTTGACACAATGGGGGAAACCCCTGATGCAGCG  
ACGCCGCGTGAGCGATGAAGCCCTTCGGGGTGTAAGCTCTTTCGGCAGGGAAGATAATG  
ACGGTACCACCAGAAGAAGCCCCGGCTAACTTCGTGCCAGCAGCCGCGGTAATACGGAGG  
GTGCGAGCGTTGTTTCGGAATTATTGGGCGTAAAGCGCGTGTAGGCGGTTTTTTAAGTCTG  
ATGTGAAAGCCCTGGGCTCAACCCGGGAAGTGCATTGGAAACTGGGAGACTTGAATACGG  
GAGAGGGTAGTGGAATTCCTGGTGTAGGAGTGAAATCCGTAGATATCAGGAGGAACACCG  
GTGGCGAAGGCGGCTACCTGGACCGATATTGACGCTGAGACGCGAAAGCGTGGGGAGCAA  
ACAGGATTAGAAACCCCCGTAGTCC

>Otu13707

CCAGCCTATGGGGGGCAGCAGTGGGGAATATTGGGCAATGGGCGAAAGCCTGACCCAGCG  
ACGCCGCGTGAGCGATGAAGGCCTTCGGGGTGTAAGTCTTTCATGCGGAAAGAATTGC  
CTTATGGTTAATACCCATGAGGTTTGACGGTACCGCAGGAGGAAGCACCGGCTAACTCCG  
TGCCAGCAGCCGCGGTAATACGGAGGGTGCAGGCGTTGTTTCGGAATTATTGGGCGTAAAG  
GACGCGTAGGCGGTAATGAAAGTCAGATGTGAAATACTTCGGCTCAACTGGAGAACTGCA  
TCTGAAACTTCATAACTCGAGTACAGAAGAGGGGAAACGGAATTCCCGGTGTAGAGGTGAA  
ACTCGTAGATATCGGGAGGAACACCAGTGGCGAAGGCGGTTTCCTGGTCTGATACTGACG  
CTGAGGCGTGAAAGTGTGGGGAGCAAACAGGATTAGAAACCCCCGTAGTCC

>Otu13717

CCAGCCTACGGGGTGCTGCAGTCAAGAATATTCCCCAATGGCCGCAAGGCTGAGGGAGCG  
ACGCCGCGTGAGGAAGAAGCCCTTCGGGGTGTAAGTCTTTCCTTCGAGAACAACCTCT  
GAGTGTACCGAAGGAATAAGGGGCTGCTAACTTCGTGCCAGCAGCAGCGGTAATACGAAG  
GCCCCGAGCGTTATCCGGATTTATTGGGCGTAAAGCGTTCAACGGTGGCATGGTGTGTTT  
TTGGTTAAATCCCACAGCTCAACTGTGGGGCTGCCGGGAAAACCTGCCAAGCTTGAGGACG  
GAAGAGGCGCGCGGAACCTACCGGTGTAGCGGTAAAATGCGTTCATATCGGTAGGAACACC  
GAAGGCGAAAGCAGCGCGCTGGGACGTCTCTGACACTAAAGAACGAAAGCGTGGGTAGCG  
AATGGGATTAGAGACCCCCGTAGTCC

>Otu13720

CCAGCCTATGGGGGGCTCCAGGCGCGAAACCTTTACAATGCGCGAAAGCGTGATAGGGGA  
ATTCTGAGTGATGTTGGAACCTACGTTCCCTCATCTTTTGCCAAGTCCAAACAGCTTGCGGA  
ATAAGTGCTGGGTAAAGACCAGTGCCAGCCGCCGCGGTAATACTGGCAGCACGAGTGGTAT  
CCACGAATATTGGGTCTAAAGAGTCCGTAGCCGGTCTTTAAGTCTTCTGTGAAATCTTG  
AGGCTTAACTTCAAGGCGTGCAGAAGATACTGCTGGACCTGAGAGTGGGGGAGGTCAGGA  
GTACTTATGGGGTAGTGGTAAAATACTGTAATCCTATAAAGGACTCTCAGTGGCGAAGGCG  
CCTGACCAAAACACGTCTGACGGTGAGGGACGAAGGCTAGGAGAACGAATCGGATTAGAG  
ACCCGAGTAGTCC

>Otu13721

CCAGCCTACGGGAGGCAGCAGTAGGGAATATTGCGCAATGGGGGAAACCCCTGACGCAGCG  
ACGCCGTGTGAGGGAAGAAGGCTTTTCGGGTCGTAAACCTCTGTGAGAAAGGAAGAACCTC  
CCATATCCGAACAGGGTGTGGGACTGACGGTACTTTCAAAGGAAGCGCCGGCTAACTCCG  
TGCCAGCAGCCGCGGTAATACGGAGGGCGCAAGCGTTAATCGGAATCACTGGGCGTAAAG  
CGCGCGTAGGCGGCTTTCTAAGTCGGGCGTGAAAGCCCTCGGCTCAACCGGGGAACTGCG  
TTCGAAACTGGGAGGCTTGAGTCCCTGGAGAGGGTGGCGGAATTCCGGGTGTAGGAGTGAA  
ATCCGTAGATATCCGGAGGAACACCGGTGGCGAAGGCGGCCACCTGGACAGGTACTGACG  
CTGAGGCGCGAAAGCGTGGGGAGCAAACAGGATTAGATACCCCTGTAGTCC

>Otu13725

CCAGCCTATGGGTCGCTGCAGTCGGGAAATTTTTGCAATGCGCGAAAGCGTGACAGAGCA  
AGTCAGAGTGCTTTTCCATATTGGAAGAGCTTTTGTGTGATGTAAACATTACACGAATA  
AGGAGTGGGAGAGACTGGTGCCAGCCGCCGCGGTAATCCAGCACTCCAAGTCGCAGCCA  
CAATTATTGGGTCTAAAACATCCGTAGCTTGCTTTGTAAAGTCTTTTGTCAAATCGGGACT  
CTTAAGGTTCCGGCGAGCAAAAGATACTGTTTAGCTAGGGACCGGGAGATGTGAAGAGTA

CGAATTAGGTAGCGGTAAAAATGCGTTGATCTTTTTTCGGACTAACAACAGCGAAGGCACTT  
CACAAGAACGGATCCGACAGTGAGGGATGAAGGCTAGGGGCGCAAATTGGATTAGATACC  
CGTGTAGTCC

>Otu13726

CCAGCCTACGGGGCGCTGCAGTCGAGAATTTTTTCAATGGGCGAAAGCCTGATGGAGCG  
ACGCCGCGTGGGGGATGAATGGCTTCGGCCCGTAAACCCCTGTCATTCGCGAACAATGCC  
TGCGACTTAATACGTCGCAGGTTGATAGTAGCGGAAGAGGAAGGGACGGCTAACTCTGTG  
CCAGCAGCCGCGGTAATACAGAGGTCCCAAGCGTTGTTTCGGATTTCATTGGGCGTAAAGGG  
TGCGTAGGTGGTGGCGTAAGTCGGATGTGAAATCCCGGAGCTTAACTCCGGAAGTGCATT  
CGATACTGCGGTGCTTGAGGACTGGAGAGGAGATCGGAATTCACGGTGTAGCAGTGAAAT  
GCGTAGATATCGTGAGGAAGACCGGTGGCGAAGGCGGATCTCTGGACAGTTCCTGACACT  
GAGGCACGAAGGCCAGGGGAGCAAACGGGATTAGAGACCCGCGTAGTCC

>Otu13728

CCAGCCTACGGGAGGCAGCAGGCGCGAAACCTTTGCAATACACGAAAGTGTGACAAGGGG  
ATTCCAAGTGTGCATATACCATATGCACTTTTTTCGAAGCGTAAAAAACTTTGGGAATAAG  
GGGTGGGCAAGACTAGTGCCAGCCGCCGCGGTAAAACTAGCATCTCGAGTGGCAGCCACA  
TTTACTGGGCTTAAAGCGTCCGTAGCTCGTTCAGAAAGTCCCCGGTGAAATCCTACGGCT  
TAACCGTAGGGCTTGCCAGGGAACTCCTGGACTAGAAGGCAGGAGAGTTCAGGGGTACG  
TCTGGGGTAGGGGTGAAATCCTATAATCCTAGACGGACCAACAGTGGCGAAGGCGCCTGA  
CGTGAATGCGCTTGACAGTGAGGGACGAGAGCCAGGGTCGCGAAACGGATTAGATACCTA  
GTCC

>Otu13734

CCAGTCTATGGGTGGCAGCAGTGAGGAATCTTGGACAATGGGGGCAACCCTGATCCAGCG  
ACGCCGCGTGAAGGATGAAGGCTTTCGGATTGTAAACTTCTTTTGTTCGGGAATAACGAA  
TCTGTGGAAACACGGAGACTGAAGGTACCGGATGAATAAGCCACGGCTAACTTCGTGCCA  
GCAGCCGCGGTAATACGAAGGTGGCAAGCGTTACTCGGAATTACTAGGCGTAAAGGGCAG  
GTAGGTGGTTTCGGTAAGTCTGTTGTGTAAGCTCCCGGCTTAACTGGGAGAGGTCAACGGA  
AACTACCGGACTTGAGTATAGGAGAGGTTACTGGAATTCCTGGTGTAGCGGTGAAATGCG  
CAGAGATCGGGAGGAACACCAATGGCGAAAAGCAGGTAAGTGGACTATTACTGACACTCAG  
CTGCGAAAGCTAGGGGAGCAAACAGGATTAGAAACCCCCGTAGTCC

>Otu13735

CCAGCCTATGGGAGGCTGCAGTGGGGAATATTGGGCAATGGGCGAAAGCCTGACCCAGCG  
ACGCCGCTGTGGGCGATGAAGGCCTTCGGGTGTAAAGCCCTGTTGGGTGGAAAGAAGGGC  
TTTTGGACGAATAATCCAGAAGCTTTGACGGTACCACCAGAGGAAGCACCGGCTAACTCC  
GTGCCAGCAGCCGCGGTAATACGGAGGGTGCAAGCGTTGTTTCGGAATTACTGGGCGTAAA  
GGGCGCGTAGGTGGTTGTGTAAGTCAGATGTGAAATCCCGAGGCTCAACTTCGGAAGTGC  
ATCTGATACTGCATGACTCGAGTGCAGCAGAGGGAAACGGAATTCCTGGTGTAGAGGTGA  
AATTCGTAGATATCAGGAGGAACACCGGTGGCGAAGGCGGTTTCCTGGGCTGACACTGAC  
ACTGAGGCGCGAAAGCGTGGGTAGCAAACAGGATTAGAAACCCCTGGTAGTCC

>Otu13743

CCAGCCTATGGGGTGCTCCAGTGGGGAATATTGGACAATGGGCGCAAGCCTGATCCAGCC  
ATGCCGCGTGAGTGATGAAGGCCTTCGGGTGTAAAGCTCTTTCGCACGTGACGATGATG  
ACGGTAACGTGAGAAGAAGCCCCGGCTAACTTCGTGCCAGCAGCCGCGGTAATACGGAGG  
GTGCAAGCGTTGTTTCGGAATTACTGGGCGTAAAGGGCGCGTAGGTGGTTGCGTAAGTCGG  
ATGTGAAATCCCCGGGCTTAACCCGGGAAGTGCACCCGATACTGCGTGACTCGAGTGCAG  
CAGAGGGAAACGGAATTCCTGGTGTAGAGGTGAAATTCGTAGATATCAGGAGGAACACCG  
GTGGCGAAGGCGGTTTCCTGGGCTGACACTGACACTGAGGCGCGAAAGCGTGGGTAGCAA  
ACAGGATTAGAGACCCCTCGTAGTCC

>Otu13747

CCAGCCTATGGGTTGCACCAGTAGGGAATATTGGTCAATGGGCGCAAGCCTGAACCAGCC  
ATGCCGCGTGAGTGATGAAGGCCTTCGGGTGCTAAACTCTTTTCTGAGGGAAGAACATC  
CTGCGTAGGAAATGACGTGGGCTTGACGGTACCTCAGGAATAAGCAACGGCTAACTCCGT  
GCCAGCAGCCGCGGTAATACGGAGGTTGCGAGTGTTGTTTCGGAATAACTGGGCGTAAAGG  
GAGCGCAGGCGGTTGGGTAAAGTCTAAAGTGAAAGCCCGGGGCTCAACTCCGGAAGTGCTT  
TGGATACTACCCCACTCGAGTTCGTGAGAGGAAAGCGGAATTCAGGTGTAGCGGTGAAA  
TGCGTAGATATCTGGAGGAACACCGGTGGCGAAAGCGGCTTTCTGGCACGATACTGACGC  
TGAGGCTCGAAAGCGTGGGGAGCAAACAGGATTAGAGACCCGCGTAGTCC

>Otu13752

CCAGCCTATGGGGTGCTCCAGGCGCGAAACCTTTACAATGCGCGAAAGCGTGATAAGGGA  
ACTCTGAGTGCCGCTCGGCTTTTGCCGACTGTCTTTTGGCAAACCTCAAAACGTTTGCAGA  
ATAAGTTCTGGGTAAAGACCAGTGCCAGCCGCCATGTGCTATGCACATTGCACACGGTACG  
CGTAATACTGGCAGAACGAGTGGTGTCCACGAATATTGGGTCTAAAGAGACCGTAGCTG  
GCCTGTTAAGTTCACTGTGAAATCTTGGGGCTCAACCTCAAGGCGTGCACTGAATACTGG  
CAGGCTCGAGAGCGGGGAGGTTAGGGGTACTTACGGGGTAAGAGTAAAATCTGTTGATC  
CTGTAAGGACCACAGTGGCGAAGGCGCCTAACCAAAACGCGTCTGACAGTGAGGGTCTGA  
AGGCTAGGAGAACGAATCGGATTAGAAACCCTGGTAGTCC

>Otu13768

CCAGCCTACGGGGGGCTGCAGTGGGGAATTTTGACAATGGGCGGAAGCCCGATCCAGCC  
ATTCCGCGTGAGTGATGAAGGCCTTCGGGTCTGTAAGCTCTGTCAAAGGGAAAGAAGTGT  
ATGGTGGTTAATACCCATTATACTTGACGGTACCCTCAAAGGAAGCACCGGCTAACTCCG  
TGCCAGCAGCCGCGGTAATACGGAGGGTGCAGAGCGTTGTTTCGGAATTATTGGGCGTAAAG  
CGCGTGTAGGCGGTTTTTTTAAGTCTGATGTGAGAGCCCTGGGCTCAACCCGGAAGTGCA  
TTGGAAACTGGGAGACTTGAATACGTGAGAGGGTAGTGGAATTCCTGGTGTAGGAGTGAA  
ATCCGTAGATATCAGGAGGAACACCGGTGGCGAAGGCGGCTACCTGGACCGATATTGACG  
CTGAGACGCGAAAGCGTGGGGAGCAAACAGGATTAGATACCCGCGTAGTCC

>Otu13775

CCAGCCTACGGGAGGCAGCAGGCGAGGAAATTTTCCAATGTCCGCAAGGATGAGAAAGGA  
ATCCGAAGTGCTTTTCTTTTGTAGAAAAGCTTTTATCCACTGCAAAAAGGTGGAGGAATAA  
GGACTGGGCAAGACCGGTGCCAGCCGCCGCGGTAATCCCAGCAGTCCGAGTCGTGGCCAC  
ATTTATTAGGTCTAAAACATTCGTAGCTTGCTTTGTAAAGTTCCTTGTGAAATCTGTGCGC  
TTAACGGCAGAGCGTGCAAGGGATACTGCATTGCTAGAGACTGGTAGACGTAAGGAGTAC  
GGTTGAGGTAGCGGTAAAATGTTTTAATCTCAATCGGACTAACAATGGCGAAGGCACCTT  
ACGAGGACAGATCTGACAGTGAGGAATGAAGGCCAGGGGCGCAAAATGGATTAGAAACCC  
TCGTAGTCC

>Otu13786

CCAGCCTATGGGGGGCTCCAGGGCAATGAAGATCCCGGCCCGGAAACGGACATCTATCTC  
CCGGTGCGTTTTGGAATCCTTCAGGATCGAGGGCTTTGCCGGCTCCCGGACATGGAGCCAT  
ATCACCCGGAGGCCTAGTGGTGACTCCGATCCGGATACCCTGGTGTGGACCTTCACCTT  
TACGACGATACATGGCGATTGGTTCGGGGAAGTTCTCGGCTTACATTTCAAGTCAGTAGAC  
CGCCGGGTGTTGTTGCGCGCTCGCCAGGGTCTGTTTGGCCGAGCGCCTCCACGAGATGAAT  
TGGCTACCCCGGCAACGTGCTGGTTTTGATCCAGCGGGTTTGCAGCCGGACTACTTTCCA  
TCCCCTGATCGAATCGTGGATGCGGTCTTCCTGCACTCGGCCGATTAGATACCCTCGTA  
GTCC

>Otu13789

CCAGCCTACGGGTGGCTCCAGTGGGGAATCTTGACAATGGGGGAAACCCTGATGCAGCG  
ACGCCGCGTGAGCGATGAAGCCCTTCGGGGTGTAAGCTCTTTCGGCAGGGACGATTATG  
ACGGTACCTGCAGAAGAAGCTGCGGCTAACTACGTGCCAGCAGCCGCGGTAATACGTAGG  
CAGCAAGCGTTGTTTCGGAATTACTGGGCTTAAAGAGTGCGTAGGCGGTTGGGCAAGTCTG  
TTGTGAAATCTCCCGGCTTAACTGGGAGGGTGCGGTGGAAACTGCCCGGCTAGAGTGTGG  
GAGAGGGAAAGTGGAATTCCTGGTGTAGCGGTGAAATGCGAAGACATCAGGAGGAACACCG  
GTGGTGTAGACGGCTTTCTGGACCGTAACTGACGCTGAGACACGAAAGCGTGGGTAGCAA  
ACAGGATTAGAGACCCGTGTAGTCC

>Otu13790

CCAGCCTATGGGAGGCTGCAGTCGGGAAACTTTTGCAATACACGTAAGTGTGACAAAGCA  
AGCCAGAGTGTTTTCTTTTGTAGAAAACCTTTTGTGAGATGTAAAAAGTCTCACGAATAA  
GGACCGGGCAAGACTGGTGCCAGCCGCCGCGGTAATCCCAGCAGTCCAAGTCGCAGCCAC  
ATTTGTTGGGTCTAAAACATCCGTAGCTTGCTTTCAAGTCTTTTGTGAAATCGGGACTC  
TTAAGGTTCCGGCGGGCAAAAGATACTGTAAGGCTAGAGACCGGGAGGCGTAAGAAGTAC  
GGACAGGGTAACGGTAAAATGTGTTGATCCTGTTTGGACTAACAGTCGCGAAGGCGTCTT  
ACGAGAACGGTCTGACAGTGAGGGATGAAGGCTAGGGGCGCAAAGTGGAATTAGATACCC  
CAGTAGTCC

>Otu13806

CCAGCCTACGGGACGCACCAGCTAAGAATATTCCGCAATGGGAGATATCCTGACGGAGCG  
ACGCCGCGTGATGAAGAAGGCAGAAATGTTGTAAAGTACTTTTATACGGGAAGAATAAG  
GCAGGTAGTGGAATAATCTGTTGATGACGGTACCGTATGAATAAGCCACGGCTAACTACG  
TGCCAGCAGCTGCGGTAATACGTAGGTGGCAAGCGTTGTTTCGGAATTTATTGGGCGTAAAG

GGCATGTAGGCGGTTATATAAGTGTGAATTGAAATACCGGAGCTTAACTCCGCGTTTGGT  
TTGCAAACGTATGACTAGAGTGTAGAAGGGGAAACTGGAATTCCGCGTGTAGGGGTGAA  
ATCTGTAGATATGCGGAAGAATACTTGTGGCGAAGGCGAGTTTCTGGTCTATAACTGACG  
CTGAAATGCGAAAGTGTGGGGAGCAAACAGGATTAGAGACCCCCGTAGTCC

>Otu13816

CCAGCCTACGGGGGGCTCCAGTGGGGAATATTGGACAATGGGCGCAAGCCTGATCCAGCC  
ATGCCGCGTGAGTGACGAAGGCCTTAGGGTTGTAAAGCTCTTTTGCCGGGGAAGATAATG  
ACGGTACCCGGAGAATAAGTCCCGGCTAACTTCGTGCCAGCAGCCGCGGTAATACGAAGG  
GGACTAGCGTTGTTTCGAATCACTGGGCGTAAAGCGCACGTAGGCGGACTTTCAAGTCGG  
GGGTGAAATCCCAGGGCTCAACCCTGGAATGCCTTCGATACTGTGAGTCTCGAGTCCGG  
AAGAGGTGGGTGGAATTCCTAGTGTAGAGGTGAAATTCGTAGATATTAGGAAGAACACCG  
GTGGCGAAGGCGGCCACTGGTCCGGTACTGACGCTGAGGTGCGAAAGCGTGGGGAGCAA  
ACAGGATTAGATACCCTAGTAGTCC

>Otu13820

CCAGCCTATGGGAGGCTGCAGTAACGAATATTCCGCAATGGGCGCAAGCCTGACGGAGCG  
ATGCCGCGTGACAGGACGAAGCCCTTCGGGGTGTAAACTGCTGTCAGGGTTTAGGAATCAA  
TTGACCAAACCCAAAGGAAGAGGCGACTAACTCTGTGCCAGCAGTCGCGGTAATACAGAG  
GCCTCGAGCGTTAATCGGAATCACTGGGCTTAAAGGGTGCGTAGGCGGGACCGCAAGTGC  
CTTGTGAAATCCCACGGCTTAACCGTGGAATGCTTGGTAGACTTCGGTCCTTGAGGTGCG  
GTAGGGGTGCTGGAATCTAGGTGGAGCGGTGAAATGCGTAGATATCTAGAGGAACGCC  
AATGGTGAAGACAGGCAACTGGGCCGATTCTGACGCTGAGGCACGAAAGCGTGGGGAGCG  
AACGGGATTAGAGACCCGCGTAGTCC

>Otu13837

CCAGCCTATGGGGTGCAGCAGTGGGGAATATTGCACAATGGGCGCAAGCCTGATGCAGCG  
ACGCCGCGTGGGGGACGAAGGCCTTCGGGTGTAAACCCCTGTCGGCAGGGACGAATGGG  
TGGGTAGCTAACATCTGCCTATCTTGACGGTACCTGTAAAGGAAGCACCGGCTAACTCTG  
TGCCAGCAGCCGCGGTAAGACAGAGGGTGAAGCGTTGTTTCGAATTACTGGGCGTAAAG  
GGCGCGTAGGCGGTTCTGCAAGTCGGATGTGAAATCCCTCGTTTCAAGCGAGGAACTGCA  
TTCGAAACTGCAAGACTAGAGTCCTGGAGAGGGAAGTGGAAATTCCTGGTGTAGAGGTGAA  
ATTCTGTAGAGATCAGGAGGAACACCCGAGGCGAAGGCGGCTTCCTGGACAGTGAAGTACG  
CTGAGGCGCGAAAGCGTGGGTAGCAAACAGGATTAGAAACCCAGTAGTCC

>Otu13838

CCAGCCTACGGGTCGCTCCAGTGACGAATATTCCGCAATGGGCGAAAGCCTGACGGAGTG  
ACGCCGCGTGTGGGACGAGGCCCTTCGGGTGTAAACCACTGTCAGGGAACAAGAACGCA  
ATGACTATTCCCAGAGGAAGGGGCGACTAACTCTGTGCCAGCAGTCGCGGTAATTCAGAG  
GCCCCAAGCGTTAATCGGAGTCACTGGGCTTAAAGGGTGCGTAGGCGGACTTGTAAGTGC  
CTTGTGAAATCCCACGGCTCAACCGTGGAACCGCTCGGCATACTGCTCGTCTTGAGGTGCG  
GTAGAGGTGCTGGAATCTAGGTGTAGCGGTGAAATGCGTAGATATCTAGAGGAACGCC  
AATGGTGAAGACAGGCGACTGGGCCGATTCTGACGCTGAGGCACGAAAGCGTGGGGAGCA  
AACGGGATTAGAAACCCAGTAGTCC

>Otu13839

CCAGCCTATGGGGGGCAGCAGTCAAGAATCTTCCACAATGGCCGAAAGGCTGATGGAGCG  
ACGCCGCGTGTATGAAGACGCCCTTCGGGTGTAAAGTACTTTTTTTTAGGGATGAAACAA  
TGACAGTACCTAAAGAATAAGGGGCTGCTAACCTCGTGCCAGCAGCAGCGGTAATACGAG  
GGCCCCAAGCTGTATCCGATTTATTGGGCGTAAAGCGTGTGTAGGTGTTTGTAAACATC  
TTTTGTAAATCTGCGGGCTTAACCCGTAGGCCGCGGAAGATATGGACAGACTAGAGACA  
GGGAGAGGTAAGCGGAATTGCTGGTGTAGGGGTAAATCCGTTAATATCAGCAGGAACAC  
CAAATGCGTAGGCAGCTTACTAGAACTGTTCTGACACTGAGACACGAAAGCGTGGGGAGC  
GAATGGGATTAGAAACCCCGTAGTCC

>Otu13848

CCAGCCTATGGGTTGCTGCAGTAAGGAATATTGGTCAATGGAGGCAACTCTGAACCAGCC  
ATGCCGCGTGACAGGAAGACGGCCCTATGGGTGTAAACTGCTTTTGAATGGGAGAAAACC  
CCGGTACGTGTACCGGTTGATAGTACCATTAGAATAAGCATCGGCTAACTTCGTGCCAG  
CAGCCGCGGTAAGACGAAGGATGCAAGCGTTATCCGATTCATTGGGTTTAAAGGGTGCG  
TAGGCGGACTTGTAAGTCAGTGGTGAATCTCTCAGCTTAACTGAGAACTGCCCTTGAT  
ACTGCAGGTCTAGAGTATAGATGACGTTGGCGGAATATGACATGTAGTGGTGAATACTT  
AGATATGTCATAGAACACCGATTGCGAAGGCAGCTAACGAACTATAACTGACGCTGAGG  
CACGAAAGTGCGGGGAGCAAACCGGATTAGAAACCCCTGTAGTCC

>Otu13850

GGACTACAGGGGTTTCTAATCCTGTTTGCTCCCCTAGCTTTCGCGCCTGAGCGTCAGTAT  
TAGGCCAGATGGGCGCCTTCGCCACTGGTGTTCTCCCGATATCAATGCATTTACCGCT  
ACACCGGAATTCCCCCATCTCTCCTATACTCAAGCCTTGCAGTCTGAGATGCATTTCC  
CTGGTTGAGCCAGGGCATTTACATCCCACCTACAAGGCCGCTGCACGCCCTTTACGCC  
CAGTAATTCGAACAACGTTTCGCTCCCCCGTATTACCGCGGCTGCTGGCACGGAGTTGG  
CCGGAGCTTCTTTAGCAGTACCGTCAAGCAGATGGACTGTTGCCCCACCTGCGTTTCTT  
CCTACTCGACAGGGCTTTACAACCTAACGGCCTTCATCGCCACGCGGCGTCGCTCGGTC  
AGGGTTTCCCCCATTGCCGAAGCCTCTCGACTGCTGCCACCCATAGGCTGG

>Otu13862

CCAGCCTACGGGACGCTCCAGTGAGGAATATTGCGCAATGGACGAAAGTCTGACGCAGCG  
ACGCCGCGTGAGCGATGAAGGCCTTCGGGTCGTAAAGCTCTTTTAGCAGGGACGAGTGAG  
GACGGTACCTGTTGAATAAGTCTCGGCTAACTACGTGCCAGCAGCCGCGGTAAAACGTAG  
GAGGCGAGCGTTATCCGGATTCACTGGGCGTAAAGCGTGCGTAGGCGGTTGGGTAAAGTCG  
GACGTTAAAGCCCCTGGCTCAACTAGGGGAGTTCGTTTCGATACTGCTTGGCTTGAGGATG  
ATAGAGGAAAGCGGAATTCCCGGTGTAGCGGTGGAATGCGTAGAGATCGGGAGGAACACC  
AGTGCGGAAAGCGGCTTTCTGGCTCATTTCTGACGCTGAGTGCACGAAAGCGTGGGGAGC  
AAACGGGATTAGAAACCCCAGTAGTCC

>Otu13870

GGACTACGCGGGTATCTAATCCTGTTTGCTCCCCACGCTTTCGTACATCAGCGTCAGTAA  
TGGCCCAGTAAGCTGCCTTCGCAATTGGTGTTCTGTGTAATATCTAAGCATTTACCGCT  
ACATTACACATTCCGCCTACCTTGACCGTACTCAAGATTAACAGTATCAATGGCAAGTCT  
CCAGTTAAGCTGAAGTTTTTACCCTGACTTATTATTCCGCCTACGCACCCTTTAAACC  
CAATAAATCCGGATAACGCTCGCATCCTCCGTATTACCGCGGCTGCTGGCACGGAGTTAG  
CCGATGCTTATTCCCAGGGTACCGGCAAGCCACGACACGTCGTAGGTTTTCTTCCCCTGG  
AAAAGCAGTTTACAACGCATAGCGCCGTCTTCTGCACGCGGGATGGCTGGTTCAGGCTT  
GCGCCCATTGACCAATATTCTCACTGGTGCCCCCGTAGGCTGG

>Otu13871

CCAGCCTATGGGTTGCTGCAGTCGAGAATTTTTCTCAATGGGCGAAAGCCTGAAGGAGCG  
ACGCCGCGTGCGAGATGAAGGCCTTCGGGTTGTAAATCGCTGTCAGAGGGGAGGAAATGC  
TAGTGGGTTCTCCCATTAGTTTGACCTATCCTCAGAGGAAGGACGGGCTAAGTTCGTGCC  
AGCAGCCGCGGTAAGACGAACCGTCCAAACGTTATTTCGGAATCACTGGGCTTAAAGGGTG  
CGTAGGCGGTCCGGGAAGTTGGGTGTGAAAGCCCTCGGCTCAACCGAGGAAGTGCCTCA  
AACTGCCGGACTTGAGGGAGACATAGGTGAGCGGAAGTCTAGGGTGGAGCGGTGAGATGC  
GTTGAGATCCTAAGGAACACCAGTAGCGAAAGCGGCTCACTGGGTCTCTTCTGACGCTGA  
TGCACGAAAGCTAGGGGAGCGAAGAGGATTAGAAACCCCTCGTAGTCC

>Otu13878

CCAGCCTACGGGATGCTGCAGTCACGAATCTTCCTCAATGGCCGAAAGGCTGAAGGAGCG  
ACGCCGCGTGATGAAGACGCCCTTCGGGGTGTAAGTACTTTTATCTGGGAAGAATCCA  
TGACGGTACCAGATGAATAAGGAGCTGCTAACCTCGTGCCAGCAGCAGCGGTAATACGAG  
GGCTCCAAGCGTTATCCGGATTTATTGGGCGTAAAGGGTCCGTAGGCGGTTTTTTCGCATC  
TCCTGTTAAATCCCGAGGCTCAACCTCGGATCAGCGGGAGAGATGGACAACTAGAGGCC  
AAGAGAGGCAAGCGGAATTGCTGGTGTAGGGGTTAAATCCGTTAATATCAGCAGGAACAC  
CGAATGCGAAAGCAGCTTGCTAGAATGGTCCTGACGCTAAGGGACGAAAGCGTGGGTAGC  
GAATGGGATTAGAAACCCTCGTAGTCC

>Otu13879

CCAGCCTACGGGGGGCAGCAGTCGAGAATCATTCGCAATGGGCGCAAGCCTGACGATGCG  
ACGCCGCGTGCGGGATGGAGGCCTTCGGGTTGTAAACCGCTGTCAAAGGGGAAGAAACGC  
GCGAACGCTAACATCGTTTCGCGTTTGACGTTACTCTTAAAGGAAGCCACGGCTAACTCCG  
TGCCAGCAGCCGCGGTAATACGGAGGTGGCGAGCGTTGTTTCGGAATTACTGGGCGTAAAG  
GGTGTGTAGGCGGTTCGGACGTGTTTCGGTGTGAAAGCCCCGGCTCACTCGGGGAAGTGA  
TCGAAAAGTGTCCGGCTTGAGTGCAGGAGAGGAGAATGGAATTTCCGGTGTAGCGGTGAA  
ATGCGTAGATATCGGAAGGAACGCCAATGGCGAAAGCAGTTCTCTGGCCTGTTACTGACG  
CTGAGGCACGAAAGCCAAGGGAGCAAACGGGATTAGATAACCCCGTAGTCC

>Otu13889

CCAGCCTATGGGGGGCTCCAGTTGGGAATCTTGCAATGGGGGAAACCCTGATGCAGCG  
ACGCCGCGTGAGTATGAAGGATCTAGGTCTGTAAACTCCTTTTTGTGAGGAAAGACTTAG  
GACGGTACCTGACGAATAAGCCCCGGCTAACTACGTGCCAGCAGCCGCGGTAAGACGTAG

GGGGCGAGCGTTGTCCGGATTTACTGGGCGTAAAGGGCGCGTAGGCGGCTAGTTAAGTGA  
GAAGTGAATCTCCAGGGCTCAACCCGGAACTGCTTTTCATACTGGCTAGCTAGAGGAA  
CGCAGAGGTGTGTGGAATTCCTGGTGTAGCGGTGAAATGCATAGATATCAGGAGGAACAC  
CCATGGCGAAGGCAGCACACTGGGCGTTTCCTGACGCTGAGGCGCGAAAGCGTGGGTAGC  
AAACAGGATTAGAAACCCCTTGTAGTCC

>Otu13895

CCAGCCTATGGGTTGCAGCAGTCGAGAATTTTTCAACAATGGGCGCAAGCCTGATGGAGCG  
ACGCCGCGTGGGGGATGAATGGCTTCGGCCCGTAAACCCCTGGCATTTCGGGATCAATGCG  
TCTGACCTAACACGTCAGACGTTGATAGTACCGGAAGAGGAAGGGACGGCTAACTCTGTG  
CCAGCAGCCGCGGTAATACAGAGGTCCCAAGCGTTGTTTCGGATTTACTGGGCGTAAAGGG  
TGCGTAGGCGGTTCGGATAAGTTTGATGTGAAAGCTCGGAGCCTAACTCCGAAACGGCATT  
GAATACTATCTGGCTAGAGGTGGGATGGGGGACTGGAATTCTCGGTGTAGCAGTGAAAT  
GCGTAGATATCGAGAGGAACACCAGTGGCGAAGGCGAGTCCCTGGACCAATCCTGACGCT  
GAGGCACGAAAGCCAGGGGAGCAAACGGGATTAGATACCCTCGTAGTCC

>Otu13901

CCAGCCTACGGGGGGGACCAGTGGGGAATTTTGGACAATGGGCGCAAGCCTGATCCAGCC  
ATGCCGCGTGTCTGAAGAAGGCCTTCGGGTTGTAAAGGACTTTTGTCCGGGAGCAAATGC  
CCTGTGCGAATAACACAGGGAGCTGAGAGTACCGGAAGAATAAGCACCGGCTAACTACGT  
GCCAGCAGCCGCGGTAATACGTAGGGTGCAAGCGTTAATCGGAATTACTGGGCGTAAAGC  
GTGCGCAGGCGGTTTTGTAAAGCCAGATGTGAAAGCCCCGGGCTCAACCTGGGAACGGCGT  
TTGGAATACAAGACTAGAGTGTGTGAGAGGGGGTGGAAATTCGCGGTGTAGCAGTGAAA  
TGCGTAGAGATGCGGAGGAACACCGATGGCGAAGGCAGCCCCCTGGGATAACACTGACGC  
TCATGCACGAAAGCGTGGGGAGCAAACAGGATTAGAGACCCAGTAGTCC

>Otu13904

CCAGCCTATGGGTGGCAGCAGTAAGGAATATTGGGCAATGGACGCAAGTCTGACCCAGCC  
ATGCCGCGTGGAGGATGAAGGTCCTCTGGATTGTAAACTTCTTTTCTCTGGGGCGAAAAA  
TAGGTATTCTTACTTACTTGACAGTACCAGAGGAATAAGCACCGGCTAACTCCGTGCCAG  
CAGCCGCGGTAATACGGAGGGTGCAAGCGTTATCCGGATTCACTGGGTTTAAAGGGTGCG  
TAGGTGGGCAGGTAAGTCAGCGGTGAAATCCCCGAGCTTAACTTGGGAACTGCCATTGAT  
ACTATCTGTCTTGAATACCTTGGAGGTGAGCGGAATATGTCATGTAGCGGTGAAATGCTT  
AGATATGACATAGAACACCAATTGCGAAGGCAGCTCACTACACGGTCATTGACACTGAGG  
CACGAAAGCGTGGGGATCAAACAGGATTAGAAACCCCCGTAGTCC

>Otu13909

CCAGCCTACGGGTTCGAGCAGTCGAGGATATTTAGCAATGGACGAAAGTCTGACTATGTG  
ACGCCGCGTGAGGGATGAAGGTCTTCGGATCGTAAACCTCTTTTCGATAGGGAAGAAAACC  
TGTTCTTAACGGAACAGACTGACGGTACCTAGAGAAGAAGCCACGGCCAACCTCTGTGCCA  
GCAGCCGCGGTAATACAGAGGTGGCGAGCGTTACTCGGATTTATTGGGTGTAAAGGGCAA  
GTAGGCGTCTTAACAAGTTAGGAGTGAAATCCTGCAGCTTAACTGCAGAACTGCTTTTAA  
AACTGTTGAGATTGAGGCTGGGAGAGGAGAGCGGAATTCTCGGTGTAAGAGTGAAATCTG  
TAGATATCGAGAGGAACACCAGTGGCGAAGGCGGCTCTCTGGTCCAGTACTGACGCTGAG  
TTGCGAAAGCTAGGGGAGCAAACAGGATTAGATACCCTGTAGTCC

>Otu13911

CCAGCCTATGGGTGGCTGCAGTCAAGAATATTCCTCAATGGCCGAAAGGCTGAAGGAGCG  
ACGCCGCGTGAAGGATGAAGTCCCTCGGGATGTAAACTTCTTTTTTTTCGGGAAGAAACAA  
TGACGGTACCGAAAGAATAAGGGGCTGCTAAACTCGTGCCAGCAGCAGCGGTAATACGAG  
TGCCCCGAGCGTTATCCGGATTTATTGGGCGTAAAGCGCGCTAGACGGTTTGGAACATC  
TTTTGTAAATTCCAGGGCTCAACCCTGGGGCCGCAGGAGATATGGCCAGACTACGAGGC  
TGGAAGAGGCAAACGGAATTGTTGGTGTAGGGGTAAATCCGTTAATATCAACAAGAACA  
CCAAAAGCGAAAGCAGTTTGCTGGGACAGTTCTGACGTTAAGGCGCGAAAGCGTGGGGAG  
CGAATGGGATTAGAAACCCCCGTAGTCC

>Otu13914

CCAGCCTACGGGTGGCTGCAGTGGGGAATATTGGACAATGGGGGCAACCCTGATCCAGCA  
ATGCCGCGTGTGTGAAGAAGGCCTGAGGGTTGTAAAGCACTTTCAGTGGGGAGGAGGTCT  
TGTAGGTTAAGAGCTGGCAAGATGGACGTTACCCACAGAAGAAGCACCGGCTAACTCCGT  
GCCAGCAGCCGCGGTAATACGGAGGGTGCGAGCGTTAATCGGAATTACTGGGCGTAAAGG  
GTGCGTAGGTGGTAGATTAAAGTTAGCATTGAAATTCCTGGGCTTAACCTGGGGTTGTGTG  
CTAAAACCTGGTTTACTTGAGTATAGGAGAGGGTAGTGGAATTTCCGGTGTAGCGGTGAAA  
TGCGTAGAGATCGGAAGGAACACCAGTGGCGAAGGCGGCTACCTGGCCAGATACTGACAC

TGAGGCACGAAAAGCGTGGGGAGCAAACAGGATTAGAAAACCCAGTAGTCC

>Otu13925

CCAGCCTATGGGAGGCTGCAGTCGAGAATTTTTCACAATGGGCGAAAGCCTGATGGAGCG  
ACGCCGCGTGGGGGATGAATGGCTTCGGCCCGTAAACCCCTGTCATTTCGGGATCAATGCC  
TGCTATTTAAAGATGGCAGGTTGATAGTACCGGAAGAGGAAGGGACGGCTAACTCTGTG  
CCAGCAGCCGCGGTAATACAGAGGTCCCAAGCGTTGTTTCGGATTCACTGGGCGTAAAGGG  
TGCGTAGGTGGTCGGGTAAGTTTGATGTGAAATCTCGGAGCTTAACTCCGAAACGGCATT  
GAATACTATTCGGCTGGAGGGTTGGAGGGGAGACTGGAATTCTCGGTGTAGCAGTGAAAT  
GCGTAGATATCGAGAGGAACACCAGTGGCGAAGGCGAGTCTCTGGACAACCTCTGACACT  
AAGGCACGAAAAGCTAGGGGAGCAAACAGGATTAGAAAACCCGTGTAGTCC

>Otu13927

CCAGCCTATGGGTGCGACCAAGTGGGGAATATTGGACAATGGGCGCAAGCCTGATCCAGCC  
ATGCCGCGTGAGTGATGACGGCCTTAGGGTTGTAAAGCTCTTTCACCCACGACGATAATG  
ACGGTACCTGGATAAGAAGCCCCGGCTAACTTCGTGCCAGCAGCCGCGGTAATACGAAGG  
GGGCTAGCGTTGTTTCGGATTTACTGGGCGTAAAGCGCACGCAGGCGGATTGATAAGTCAG  
GGGTGAAATCCCCGGGGCTCAACCTCGGAATTGCCTTTGATACTGTCTGTCTTGAGTTTCGG  
GAGAGGTTGGCGGAATTCCTAGTGTAGAGGTGAAATTCGTAGATATTAGGAAGAACACCA  
GTGGCGAAGGCGGCCAACTGGCCCGACACTGACGCTCATGTGCGAAAGCGTGGGGAGCAA  
ACAGGATTAGAAAACCCCTTGTAGTCC

>Otu13929

CCAGCCTATGGGGGGCTGCAGTCGAGAATTTTTCACAATGGGCGAAAGCCTGATGGAGCG  
ACGCCGCGTGGGGGATGAAGGCCCTTCGGGTGCTAAACCCCTGTCAGTTGCGAACAAAGGT  
TATGGGTGAACATCCCATAATTTGATGGTAGTGACAGAGGAAGGGACGGCTAACTCTGTG  
CCAGCAGCCGCGGTAATACAGAGGTCCCAAGCGTTGTTTCGGATTTACTGGGCGTAAAGGG  
TGCGTAGGCGGCTGGGTAAGTCGAGTGTGAAAGCCCCGGGCTCAACCCGGGAACGGCACT  
GGAAACTGCCTGGCTAGAGGGTTGGAGGGGGGACTGGAATTCCCGGTGTAGCAGTGAAAT  
GCGTAGATATCGGGAGGAACGCCAGTGGCGAAGGCGAGTCCCTGGACAACCCCTGACGCT  
GAGGCACGAAAAGCTAGGGGAGCAAACAGGATTAGAAAACCCCTGTAGTCC

>Otu13930

CAGCCTATGGGTGGCAGCAGTGGGGAATTTTGGACAATGGGGGCAACCCTGATCCAGCGA  
CGCCGCGTGGAGGACGAAGGTCTTCGGATTGTAAACTCCTTTTAGAGGGGATGAATGCCT  
GCGTGAATAGCGCAGGGTGACAGTACCCTTTGAATAAGCCACGGCTAACTACGTGCCAGC  
AGCCGCGGTAATACGTAGGTGGCAAGCGTTACTCGGAATCACTAGGCGTAAAGCGCAGGT  
AGGCGGTTTCGGTAAGTCTTTTGTGAAAGCTCCTGGCTCAACTGGGAGAGGTCAAAGGAAA  
CTGCCGGACTAGAGTGTGGTAGGGGATACTGGAATTCCCGGTGTAGCGGTGAAATGCGTA  
GATATCGGGAGGAATACCTATGGCGAAAGCAGGTATCTGGGCCATCACTGACGCTGAGCT  
GCGAAAGCTAGGGGAGCAAACAGGATTAGAAAACCCCTGTAGTCC

>Otu13931

CCAGCCTATGGGACGCAGCAGTAAGGAATATTGGTCAATGGGCGCAAGCCTGAACCAGCC  
ATGCCGCGTGAAGGATGACGGCCCTATGGGTGTAAACTTCTTTTATACGGGAAAAAACCC  
CCCCGATTCTTCGGGGGCTGATGGTACCGTAAGAATAAGGATCGGCTAACTCCGTGCCAG  
CAGCCGCGGTAATACGGAGGATCCAAGCGTTATCCGGATTTATTGGGTTTAAAGGGTGCG  
TAGGCGGAATGATAAGTCAGTGGTGAAATCCTACGGCTCAACTGTAGAACTGCCATTGAT  
ACTGTCAATCTTGAGTACACTTGAAGTGGGCGGAATGTGTGTCATGTAGCGGTGAAATGCTT  
AGAGATGACACAGAACACCGATAGCGAAGGCAGCTCACTAAATTGTAACTGACGCTGAGG  
CACGAAAGCGTGGGGATCAAACAGGATTAGAAAACCCGAGTAGTCC

>Otu13934

CCAGCCTACGGGACGCTGCAGGCGAGAAAACCTTTACAATGCGCGCAAGCGTGATAGGGGA  
ACTTCGAGTGCTAGCTGTGCTAGCTTTTGCCAAGTCTAGAAAGCTTGGCGAATAAGTGGG  
GGGTAATATACGTGCCAGCCGCCGCGGTAATACGTAATCCACAAGTGGTATCCACTTATA  
TTGGGCCTAAAACCTTTGTAGCCGTTGTGCGCGTCGTTGGTGAAATCCAAGAGCTTAAC  
TTTGTGAATGGCTGACGATACGGCACGGCTGTGAGACCAAGAGATGTCAAGGGAATTCTA  
GGGTACCGGTAAAATGGTGTGATCCTTAGAGGACCTCCAGTAGCGAAGGCGCTTGACAA  
GAATGGTTCTGACGGTGAGAGAGGAAAGCTGGGGGAGCGACCCGATTAGATACCCCACT  
AGTCC

>Otu13936

CCAGACCTATGGGGGGCTGCAGTGGGGAATATTGGACAATGGGCGCAAGCCTGATCCAGC  
CATCCCGCGTGCAGGAATAAGGCCCTATGGGTGTAAACTGCTTTTCTTAGGGAAGAAAA

ACTCCGATGTATCGGAGCTTGACGGTACCTAAGGAATAAGCACCGGCTAACTCCGTGCCA  
GCAGCCGCGGTAAATACGGAGGGTGCAAGCGTTATCCGGATTTACTGGGTTTAAAGGGTGC  
GAAGGCGGTAAAGTAAGTCAGTGGTGAAAGCTTCCAGCTCAACTGGAAAATTGCCATTGA  
TACTGCTTTACTTGAGTTTGGTTGAGGTAGGCGGAATACATCAAGTAGCGGTGAAATGCA  
TAGATATGATGTAGAACACCAATTGCGAAGGCAGCTTACTAAACCAATACTGACGCTCAT  
GCACGAAAGCGTGGGGAGCAAACAGGATTAGAAACCCTCGTAGTCCT

>Otu13955

CCAGCCTATGGGGTGCACCAGCCGAGAATATTGGACAATGGGGGAAACCCTGATCCAGCG  
ACGTTGCGTGAGGAAGAAGATCTTCGGATTGTAACTTCTTTTCTAAGGAAGAAGTAA  
TTGACGGTACCTTAGGAATAAGCGGGGGCTAATTCTGTGCCAGCAGCAGCGGTAATACAG  
AACCCGCAAGCATTATCCGGATTTATTGGGCGTAAAGTGTTCGTAGGCGGTTTGGAAAGT  
CTGACATTAAATACTCCGGGCTCAACCCGGGGAGTGTGTGCGAAACTTCCAGACTAGAAG  
GCGCTAGGGGCTATCGGAACGCACGGTGTAGGGGTGAAATCCGTTGATATCGTGCGGAAC  
ACCAAAGCGAAGGCAGATAGCTAGGGCGACCTTGACGCTGAGGAACGAAAGCGTGGGGA  
GCAAGCAGGATTAGATACCCGAGTAGTCC

>Otu13963

CCAGCCTATGGGAGGCTGCAGTTTGGAAATATTTGCAATGGGCGAAAGCCTGACGAAGTG  
ACGCCGCGTGAGGATGAAGGCCTTCGGGTGTAACTCCTTTTGGCCGTTAGGAAAGCT  
GGGTGTGTGAACAGCGCATCCAGCTGACAAAGGCGGCAGAATAAGCACCGGCTAACTCTG  
TGCCAGCAGCCGCGGTAATACAGAGGGTGCAAACGTTGTTCGGTGTCAATTGGGCTTGAAG  
GGTGCGTAGGCGGCCGCGTAAGTCAGGTGTGAAATCCCTCGGCTTAACTGAGGAACTGCG  
CTTGATACTGCGTGGCTTGAGGGCCAAAGGGGAGAGCGGAACTCCAGGTGTAGCGGTAAA  
ATGCGTAGATATCTGGGGGAACGCCGATGGCGAAGGCAGCTCTCTGGGTGGCTCCTGACG  
CTGAGAGCACGAAAGCTGGGGGAGCAAACAGGATTAGATACCCTCGTAGTCC

>Otu13964

CCAGCCTATGGGTCGCTGCAGTGAGGAATATTGGTCAATGGGGGCAACCCTGAACCAGCC  
ATGCCGCGTGAAAGGAAGAAGGCCCTAAGGGTGTAAACTTCTTTTGTACGGGGGTAAACT  
CCTAATCGTGATTGGGATTGAAAGTACTGTACGAATAAGCAACGGCTAACTCCGTGCCAG  
CAGCCGCGGTAATACGGAGGTTGCAAGCGTTATCCGGATTTATTGGGTTTAAAGGGTGCG  
TAGGCGGACCCATAAGTCAGTGGTGAAAGACTGTGCTCAACGATAGCATTGCCATTGAT  
ACTGTGGATCTTGAGTACATTTGAGGTGGGCGGAATGTGTAGTGTAGCGGTGAAATGCTT  
AGATATTACACAGAACACCAATTGCGAAGGCAGCTCACTAACTGTAAGTACGCTGAGG  
CACGAAAGCGTGGGGATCAAACAGGATTAGATACCCCAGTAGTCC

>Otu13972

CCAGCCTATGGGATGCTGCAGTCGAGAATCTTCCGCAATGGGCGAAAGCCTGACGGAGCG  
ACGTTACGTGAATGATGAAGCCCTTCGGGTGTAAAGTTCTTTTATGTATGAGGAAACTA  
TTGACAGTAATACATGAATAAGGGGATCCTAATTCTGTGCCAGCAGGAGCGGTAAGACAG  
AATCCCCAAGCGTTACCCGGATTTATTGGGCGTAAAGGGTCCGTAGGTGGCGCAGTAAGT  
TGAAAGTTAAACTCATCGGCTTAACCTTTGAGGTGCTTTCAATACTGCTGTGCTAGAGG  
ATGTTAGGGGTGAACGGAACCGACGGAGTAGGGGTGAAATCCGTTGATATCGTCGGGAAC  
ACCAAAGCGAAGGCAGTTCACTAGGACAATCCTGACACTGAGGGACGAAAGCTGCGGGA  
GCAAAAAGGATTAGAGACCCCTGTAGTCC

>Otu13981

CCAGCCTATGGGGTGCTGCAGTGAGGAATATTGGGCAATGGGCGAGAGCCTGACCCAGCA  
ACGCCGCGTGGGCGACGAAGGCCTTCGGGTGTAAAGCCCTTTTCTGAGGGACGAGAGAG  
GACGGTACCTCAGGAATAAGTCACGGCTAACTACGTGCCAGCAGCCGCGTAATACGTAG  
GTGGCCAGCGTTATCCGGATTCACTGGGCGTAAAGCGCGTGTAGGTGGTTTCGTAAGTCG  
GACGTGAAAGCTCCTGGCTTAACTGGGAGAGGCCGTTGATACTGCGGAGCTTGAGGTGCG  
GGAGAGGGACGTGGAATTCCCGGTGTAGTGGTGAATGCGTAGATATCGGGAGGAACACC  
AGTGCGGAAGGCGGCGTCTTGCCCCGACCTGACACTCAGACGCGAAAGCGTGGGGAGCA  
AACGGGATTAGAAACCCTCGTAGTCC

>Otu13992

CCAGCCTACGGGGGGCTGCAGTGAGGAATATTGCGCAATGGGCGAAAGCCTGACGCAGCG  
ACGCCGCGTGAAAGATGAAGGTCTTCGGATTGTAACTTCTGTTGAGTGGGAAGAAAGTC  
TGATTTCTAATACAAATCAGGTATGACGGTACCACTTTAGAAAGCACCGGCTAACCTCGT  
GCCAGCAGCCGCGGTAATACGAGGGGTGCAAGCGTTACTCGGAATGACTGGGCGTAAAGG  
GTGCGTAGACGGTTTGTTAAGCTTGTTGTTAAATTCCCTGGCCTAACCGGGGACATGCGA  
TGAGAACTGGCATACTAGAGGATGAGAGAGAAGAGTGGAATTTCCGGAGTAGCGGTAAAA



TGCGTAGATCTCGGAAGGAACACCGATGGCGAAGGCAGCTCTTTGGCTCATTCCTGACGT  
TGAGGCACGAAAGCGTGGGGAGCAAACAGGATTAGAAAACCCGTGTAGTCC  
>Otu13995  
CCAGCCTATGGGTGGCTGCAGTAGGGAATCTTGGACAATGGGCGCAAGCCTGATCCAGCC  
ATGCCGCGTGAGTGATAAAGGTCTTCGGACTGTAAAGCTCTTTTCTGAGGGAAGAACAGA  
GAGGGTAGGAAATGACCCTTTTTTGACGGTACCTCAGGAATAAGCAACGGCTAACTCCGT  
GCCAGCAGCCGCGTAATACGGAGGTTGCAAGCGTTGTTTCGGAATGACTGGGCGTAAAGG  
GAGCGCAGCCGCGCTCGATTAGTCTGGAGTGAAAGCCCGGGCTTAACCCCGGAGGGTCTT  
CGGATACAGTCGAGCTCGAGTACGGAAGAGGAGGGTGGAATTCAGGTGTAGCGGTGAAA  
TGCGTAGATATCTGGAGGAACACCGGTGGCGAAGCGGCTCTCTGGTCCGATACTGACGG  
TCATGCTCGAAAGCGTGGGGAGCAAACGGGATTAGATAACCCCTGTAGTCC  
>Otu13998  
CCAGCCTATGGGGCGCAGCAGTAGGGAATATTGGTAATGTGCGAAAGCGCGAACCAGCAA  
CGCCGCGTGACGATGAAGGCCTTCGGGTGTAAAGTGCTTTTAGAGAGGATGAGGAAGG  
ACAGTACTCTCTGAATAAGCCTCGGCTAACTACGTGCCAGCAGCCGCGTAATACGGAGG  
GTGCAAGCGTTATCCGGATTCAGTGGGTTTAAAGGGTGCGTAGGTGGTCTGATAAGTCAG  
CGGTGAAAGCCTGGAGCTCAACTCCAGAATTGCCATTGATACTGTCAGACTTGAATCAAG  
TTGAGGTGGATGGAATATTACATGTAGCGGTGAAATGCTTAGATATGTAATAGAACACCA  
ATTGCGAAGGCAGTTCACCTAAGCTTGCAATTGACACTGAGGCACGAAAGCGTGGGGATCAA  
ACAGGATTAGAGACCCGAGTAGTCC  
>Otu13999  
CCAGCCTATGGGGTGCAACAGTCGAGAATCTTCCGCAATGGGCGAAAGCCTGACGGAGCG  
ACGCCGCGTGCGGGATGAAGGCCTTCGGGTGTAAACCGCTGTCAGTGGGGAGGAAATGC  
GCGGGAGTAATAAATAATCTCTCGTGTGTTGACCGATCCGCAGAGGAAGCACAGGCTAAGT  
TCGTGCCAGCAGTCGCGGTAACACGAACGTGTGCAAACGTTATTCGGAATTACTGGGCTTA  
AAGAGTTCGTAGGCGGCTTGTTAAGTCGGGTGTGAAATCCCTCGTCTCAACCGAGGAATT  
GCGCTCGAAACTGGCGAGCTTGAGTGAGATAGAGGTGAGCGGAACTGATGGTGGAGCGGT  
GAAATGCGTTGATATCATCAGGAACACCGGTTGCGAAGGCGGCTCACTGGGTCTTTACTG  
ACGCTGAGGAACGAAAGCTAGGGGAGCGAATGGGATTAGATAACCCGCGTAGTCC  
>Otu14007  
CCAGCCTATGGGGGGCAGCAGTAACGAATCTTCCGCAATGCCCCGAAGGGTGACGGAGCG  
ACGCCGCGGTAGGATGAAGTCCTTCGGGATGTAAACTACTGTCAGGGGAAAGAAAGTAC  
TGATCTACCCAGAGGAAGGCACGGCTAACTCTGTGCCAGCAGCCGCGTAAGACAGAGG  
TGCCAAGCGTTAGGCGGAATCACTGGGCTTAAAGCGTGTTAGGCGGATCGTTAAGTGCC  
TTGTGAAATCCCACGGCTCAACCGTGGAAGGCTGGGCATACTGGCGGTCTTGAGCTGCC  
TAAGGGCAACTGGAACAAACGGTGGAGCGGTGAAATGCGTAGATATCGTTTGGAACGCCA  
AAGGTGAAAACAGTTGCTGGGGGCATGCTGACGCTGAGACACGAAAGCCAGGGGAGCAA  
ACGGGATTAGATAACCCCGTAGTCC  
>Otu14010  
CCAGCCTACGGGGGGCTGCAGTGGGGAATATTGGACAATGGGCGCAAGCCTGATCCAGCC  
ATGCCGCGTGAGTGAGAAGGCCTTAGGGTTGTAAAGCTCTTTTGGCGGGGACGATAATG  
ACGGTACCTGACGAATAAGCTCCGGCTAACTTCGTGCCAGCAGCCGCGTAATACGAAGG  
GAGCTAGCGTTGTTTCGGAATTACTGGGCGTAAAGGGCGCGTAGGCGGTCTTATAAGTTTG  
GTGTGAAAGCCCTGGGCTTAACCTAGGAATAGCATTGGATACTGTAAGACTTGAGACCGA  
GAGAGGGAAATGGAATTGCGAGTGTAGAGGTGAAATTCGTAGATATTCGCAAGAACACCA  
GTGGCGAAGGCGATTTCTTGGCTCGGTACTGACGCTAAGGCGCGAAAGCGTGGGGAGCAA  
ACAGGATTAGAAACCCCTGTAGTCC  
>Otu14011  
CCAGCCTATGGGTTGCAGCAGTGGGGAATTTTTCGCAATGGGGGAAACCCCTGACGCAGCA  
ACGCCGCGTGAGTGATGAAGGCTTTCGGGTGCTAAAGCTCTGTCAGAAGGGAAGAAATGT  
GGGTGGCTAATATCCATACCACTTGACGGTACCTTCAAAGGAAGCACCGGCTAACTCCGT  
GCCAGCAGCCGCGTAATACGGAGGGTGCGAGCGTTGTTTCGGAATTATTGGGCGTAAAGC  
GCGTGTAGGCGGTTTATTAAGTCTGATGTGAAAGCCCTGGGCTCAACCTGGGAAGTGAT  
TGGATACTGGTAGACTTGAGTACGGGAGAGGGTAGTGGAATTCCTAGTGTAGGAGTGAAA  
TCCGTAGATATTAGGAGGAACACCGGTGGCGAAGGCGGCTACCTGGACCGATACTGACGC  
TGAGACGCGAAAGCGTGGGGAGCAAACAGGATTAGAAAACCCAGTAGTCC  
>Otu14016  
CCAGCCTATGGGAGGCTGCAGTGGGGAATATTGCGCAATGGGCGAAAGCCTGACGCAGCA

ACGCCGCGTGGGGGATGAAGGTTCTCGGATTGTAAACCCCTTTTCGATCGGAACGAATCCC  
CCCCCGGTAAATAATCGGGGGGATCGACGGTACCGAGAGAAGAAGCCACGGCTAACTCTG  
TGCCAGCAGCCGCGGTAAGACAGAGGTGGCGAGCGTTGTTTCGGATTTACTGGGCGTAAAG  
CGCACGTAGGCGGATCTTTAAGTCAGGGGTGAAATCCCGGGGCTCAACCTCGGAACCTGCC  
TTTGATACTGGAGATCTTGAGTCCGGGAGAGGTGAGTGGAAGTGCAGAGTGTAGAGGTGAA  
ATTCGTAGATATTCGCAAGAACACCAGTGGCGAAGGCGGCTCACTGGCCCCGGTACTGACG  
CTGAGGTGCGAAAGCGTGGGGAGCAAACAGGATTAGATACCCTTGTTAGTCC

>Otu14020

CCAGCCTATGGGGTGCAGCAGTGGGGAATATTGCGCAATGGGCGAAAGCCTGACGCAGCG  
ACGCCGCGTGGAGGATGAAGGTCCTTAGGATTGTAACTCCTGTCAGATGGGAAGAAAATA  
TTACGTTTAAATAGACGTGAGGAATGACGGTACCATCAGAGGAAGCACCGGCTAACTTCGT  
GCCAGCAGCCGCGGTAATACGAAGGGTGCAAACGTTATTTCGGAATCACTGGGCGTAAAGG  
GTGCGTAGACGGTATGTTAAGTTCGTCGTTAAAGGCTCCGGCCTAACCGGAGTATCGCGA  
TGAAAACCTGGCACACTAGAGGGTGAGAGAGAGAAGTGGAATTCCTGGAGTAGCGGTAAAA  
TGCGTGATCTCAGGAGGAACACCAATGGCGAAGGCAGCTTCTTGGCTCATTCCTGACGT  
TGAGGCACGAAAGCGTGGGGAGCAAACAGGATTAGATACCCGCGTAGTCC

>Otu14035

CCAGCCTACGGGATGCAGCAGGCGCGAAACCTTTACAATGCGCGAAAGCGTGATAGGGGA  
ACTCTGAGTGGCAGCCGATTTTTATCGACTGTCTTTTGGCAACCTTAAAACGGTTGCAGA  
ATAAGTTCTGGGTAAGACCAGTGCCAGCCGCCATGTGCTAACTGCACAATGCGCACGGTA  
CGCGGTAATACTGGCAGAACGAGTGGTGTCCACGAATATTGGGTCTAAAGAGACCGTAGC  
TGGTCTGTTAAGTCCACTGTGAAATCTTGGAGCTTAACTTCAAGGCGTGCAGTGGATACT  
GGCAGACTCGAGAGCGGGGGAGGTGAGGGGTACTTACGGGGTATGGGTAAAATCAGTTGA  
TCCTGTAAAGGACCACAGTGGCGAAGGCGCCTGACCAAAACGCGTCTGACAGTGAAGGGTC  
GAAGGCTAGGAGAACAAATCGGATTAGAGACCCCGGTAGTCC

>Otu14048

CCAGCCTATGGGTGGCAGCAGGAGGGAATATTGGTAATGGGCGAAAGCCCGAACCCAGCAA  
CGCCGCGTGTGCGATGAAGGCCTTCGGGTGCTAAAGCACTTTTTGAGGGGATGAGGAAGG  
ACAGTACCCTCAGAATAAGTCTCGGCTAACTACGTGCCAGCAGCCGCGGTAACACGTAGG  
AGGCGAGCGTTATCCGGATTTACTGGGCGTAAAGCGTGTGCAGGCGGTCTAGCAAGTTGG  
ATGTGAAAGCTCCCGGCTCAACTGGGAGAGGTCGTTCAATACTGCCAGACTCGAGGATGG  
TAGAGGGAGGTGGAATTCGAGCGTAGTGTTGAAATGCGTAGATATCAGGAGGAACACCG  
GTGGCGAAGGCGGCTGCCTGGACCGATATTGACGCTGAGACGCGAAAGCGTGGGGAGCAA  
ACAGGATTAGATACCCTTGTTAGTCC

>Otu14060

CCAGCCTATGGGGTGCACCAGTCGAGAATATTTCGTCAATGGGCGAAAGCCTGAACGAGCG  
ACACCGCGTGCAGGATGAAGGCCTTCGGGTGCTAAACTGCGGTAAGTGGGAGGAATGTA  
AATGACTGTACCTAGTGGAAGAGGTGGGTAAGTACGTGCCAGCAGCAGCGGTAAACGCT  
AGACCTCAAGCGTTATCCGGATTTCATTGGGCGTAAAGCGCGTGTAGGGGGTTTTGTGCGT  
CTTCTGTTAAAGCCCACCGCTAACGGTGGAAATGCAGGAGATACGACAAGACTAGAGGA  
GGTTAGAGGTGCATGGAACACACGGTGTAGGGGTGAAATCCGTTGATATCGTGTGGAACA  
CCAAAGGCGAAGGCAGTGCAGTGGGACCTTCCTGACCCTGAGACGCGAAAGCGTGGGGAG  
CAAAAAGGATTAGATACCCTAGTAGTCC

>Otu14064

CCAGCCTACGGGTGGCACCAGTGGGGAATATTGGACAATGGGCGAAAGCCTGATCCAGCA  
ATGCCGCGTGTGTAAGAAGGTCCTTCGGATTGTAAAGCACTTTTCGACGGGGACGATGATG  
ACGGTACCACCAAAGGAAGCACCGGCTAACTCCGTGCCAGCAGCCGCGGTAATACGGGGG  
GTGCAAGCGTTGTTTCGGAATTATTGGGCGTAAAGAGCGTGTAGGCGGCTTGATAAGTCAG  
ATGTGAAAGCCCTGGGCTTAACCCAGGAAGTGCATTTGAAACTGTCTTGCTTGAGTAGGG  
GAGAGGAAAGTGGAATTCCTGGTGTAGAGGTGAAATTCGTAGATATCAGGAGGAACACCG  
GTGGCGAAGGCGACTTTCTGGCCCTATACTGACGCTGAGACGCGAGAGCGTGGGGAGCAA  
ACAGGATTAGATACCCGCGTAGTCC

>Otu14066

CCAGCCTACGGGTGCTGCAGCAGGGAATCGTGCGCAATGGACGAAAGTCTGACGCCGCA  
ATGCCGCGTGGAGGATGAAGGCCTTAGGGTCGTAAACTCCTTTTGCCATGGAGGAGATGC  
CATGGAGAATAAGTGAAGTGAAGTGAAGTGAAGTGAAGTGAAGTGAAGTGAAGTGAAGTGA  
GCGTTATCCGGATTTATTGGGCGTAAAGCGTTTCGTAGGTTACTTGCCAAAGTTGCTCTTC  
AAATACCGAGGCTCAACCTCGGAAAGGGGAGTAAGACTGGTAAGATTGAATAATGGTGGG

GTTTCTAGAACTGATGGTGTAGTAGTGAAAACGTTGATATCATCAGGAATTCOAAGGGC  
GAAGGCAGGAACTAACCATTATTGACACTGAGGAACGACAGCTAGGGGAGCGAAAGG  
ATTAGAGACCCGTGTAGTCC

>Otu14068

CCAGCCTACGGGGTGCTGCAGTGAGGAATATTGGTCAATGGGCGAGAGCCTGAACCAGCC  
ATCCCGCGTGACAGGAAGAATGCCCTATGGGTGTAACTGCTTTTTTCGCAAGAAGAACAT  
CCCGAACGAGTTCGGGACTGACGGTACTGCGAGAATAAGCACCGGCTAACTCCGTGCCAG  
CAGCCGCGGTAATACGGAGGGTGCAAGCGTTATCCGGATTTATTGGGTTTAAAGGGTGCG  
TAGGCGGTTATCTAAGTCAGTGGTGAAATCCTGCAGCTCAACTGTAGAACAGCCATTGAA  
ACTGTATGACTTGAGTGATCTTGAGGTAGGCGGAATGTGTAGTGTAGCGGTGAAATGCTT  
AGATATTACACAGAACACCGATTGCGAAGGCAGCTTACTAAGGATTTACTGACGCTGATG  
CACGAAAGCGTGGGGATCAAACAGGATTAGAAACCCTTGTAGTCC

>Otu14069

CCAGCCTACGGGTCGCTCCAGTGGGGAATATTGGGCAATGGGCGAAAGCCTGACCCAGCC  
ACGCCGCGTGAGCGATGAAGCCCTTCGGGGTGTAAGCTCTTTTCGGCAGGGACGATAATG  
ACGGTACCTGCAGAAGCAGCTGCGGCTAACTACGTGCCAGCAGCCGCGGTAATACGTAGG  
CAGCGAGCGTCGTTTCGGAGTTACTGGGCGTAAAGGGTGTTGTAGGCGGTTACCTAAGTTTG  
GTGTGAAATCTCCCGGCTTAACCGGGAGGGTGCGCCGAAAACCTGGGCGACTAGAGTGCGG  
GATGGGAGAGTAGAATTCTTGGTGTAGCGGTGAAATGCGTAGATATCAGGAGGAATACCG  
GTGGTGTAGACGGCTCTCTGGACCGCAACTGACGCTGAGACACGAAAGCGTGGGTAGCAA  
ACAGGATTAGAAACCCCCGTAGTCC

>Otu14071

CCAGCCTATGGGTCGCACCAGGCGCGAAAACCTCTACACTGCACGAAAGTGTGATAGGGGG  
ATCCAAAGTGCTTATACATTGTATAGGCTTTTGCCAAAGACAAATCCTTTGGCGAATAAG  
TGGTGGGCAAGACCGGTGCCAGCCGCCGCGGTAACACCGGCGCCACAAGTGGCAACCATA  
ATTATTGGGCCTAAAGCGTTTCGTAGCCGGCTCTGTAAATCTTCTGTGAAATCGTTTGGCT  
TAACCAAACGACGTGCAAAAGACACTGCAAAAGCTTGAGATCGGGAGGAGCTTGGGGTATT  
CTTGGGGGAGCGGTAAAATGTTATAATCCCTTGAAGACCACCTGTGGCGAAGGCGCCAAG  
CTAGAACGAATCTGACGGTGAGGGACGAAAGCTAGGGGAGCGATCCGGATTAGAAACCCT  
CGTAGTCC

>Otu14072

CCAGCCTATGGGTGGCACCAGTCGAGAATCTTCCTCAATGGCCGAAAGGCTGAAGGAGCG  
ACGCCGCGTGATGAAGAAGCCCTTCGGGGTGTAAGTCTTTTATCTGGGACGAAAACA  
TGACGGTACCAGATGAATAAGGGGCTGCTAACCTCGTGCCAGCAGCAGCGGTAATACGAG  
GGCCCCGAGCGTTATCCGGATTTATTGGGCGTAAAGGGTCCGTAGGTGGTTTATCGCATC  
TCCTGTAAATTCAGAGGCTCAACTTCGGGCTGGCGGGAGAGATGGACAACTAGAGGCT  
GGACGAGGCAAGTGGAATTGCTGGTGTAGGGGTAAATCCGTTAATATCAGCAAGAACAC  
CAAATGCGAAGGCATCTTGCTTGGACAGTCTGACACTGAGGGACGAAAGCGTGGGGAGC  
GAATGGGATTAGATACCCTAGTAGTCC

>Otu14081

CCAGCCTATGGGGCGCTGCAGTGGGGAATATTGGACAATGGGCGCAAGCCTGATCCAGCA  
ATGCCGCGTGAATGATGAAGGCCCTTAGGGTTGTAAAGTCTTTTATCTGGGACGAAAACA  
ACGGTACCCACAGAAAAGCTCCGGCTAACTCTGTGCCAGCAGCCGCGGTAATACAGAGG  
GAGCTAGCGTTTTTCGGAATTATTGGGCGTAAAGAGCGTGTAGGCGGCTTATTAAGTTGA  
AAGTGAAATCCCAAAGCTTAACCTTTGGAAGTCTTTTCAAACTAATTAGCTAGAGTTTG  
TAGGAGATGATGGAATTCTTGGTGTAGGGGTGAAATCTTAGATATCAGGAGGAACACCG  
GTGGCGAAAGCGATCATCTGGGCCATATCTGACGCTGAGGCGCGAAAGCGTGGGGAGCAA  
ACAGGATTAGAGACCCGTGTAGTCC

>Otu14097

CCAGCCTATGGGGGGCACCAGTGGGGAATCTTGGACAATGGGGGCAACCCTGATCCAGCG  
ATGCCGCGTGGGTGAAGAAGGCCCTTCGGGTGTAAAGCCCTTTAGGTTGGGAAGAAGTAT  
GGCAGTAGATAAAGCGGCCATATTGACGGTACCGACAGAATAAGCACCGGCAAACCTCTGT  
GCCAGCAGCCGCGGTAATACAGAGGGTGCGAGCGTTAATCGGAGTTACTGGGCGTAAAGG  
GCGCGTAGGCGGTGGGATGAGTGTGGTGTGAAAGCCCTGGGCTTAACCTGGGAAGAGCAT  
TGCAAACGATCTGACTGGAGTATAAGAGAGGGTGGCGGAATTTCCGGTGTAGCGGTGAAA  
TGCGTAGAGATCGGAAGGAACGTGATGGCGAAGGCAGCCACCTGGCTTAATACTGACGC  
TGAGGCGCGAAAGCGTGGGGAGTGAACAGGATTAGAAACCCGAGTAGTCC

>Otu14100

CCAGCCTATGGGTTGCTCCAGTCGAGAATTTTTCTCAATGGGGGAAACCCTGAAGGAGCG  
GCGCCGCGTGGGGGATGAAGCTTTTCGGAGTGTAACCCCTTTTCGACCCGGAAGAAAGCC  
CGCAAGGGTTTGACGGTACGGGTATAAGAAGCCCCGGCTAACTACGTGCCAGCAGCCGCG  
GTA AACGTAGGGGGCCAGCGTTGCTCGGAATTACCGGGCGTAAGGGTCCGTAGGCGGT  
GTGGCAAGTCGGTAGTGAAATCTCTGGGCTTAACCCAGAGGCTGCTGCCGAAACTGCTAT  
GCTAGAGTGTGAGAGAGGCGAGTGGAATTACGGGTGTAGCGGTGAAATGCGTAGATATCC  
GTAGGAACATCCGAGGCGAAGGCGGCTCGCTGGATCACAACCTGACGCTGAGGGACGAAAG  
CTAGGGGAGCAAACAGGATTAGAAACCCCTGTAGTCC

>Otu14103

CCAGCCTACGGGTGGCTCCAGTGGGGAATTTTGACAATGGACGCAAGTCTGATCCAGCC  
ATGCCGCGTGCGGGATGAAGGCCTTCTGGGTGTAAACTTCTTTTACCTGGGAAGAAACC  
ACTCATTTCTATGAGTGTTGACGGTACCAGAGGAATAAGCACCGGCTAACTCCGTGCCAG  
CAGCCGCGGTAATACGGAGGGTGCAAGCGTTATCCGGATTTACTGGGTTTAAGGGTGTGT  
AGGCGGGTATTTAAGTCAGTGGTGAAATCTCCGAGCTCAACTTGGAACCTGCCATTGATG  
CTATCTATCTTGAATTTTGTTGAGGTAGGCGGAATAAGTCATGTAGCGGTGAAATGCATA  
GATATGACTTAGAACACCAATTGCGAAGGCAGCTTGCTAAACAAATATTGACGCTGAGGC  
ACGAAAGCGTGGGGATCAAACAGGATTAGAGACCCTAGTAGTCC

>Otu14107

CCAGCCTACGGGAGGCTCCAGTGGGGAATTTTGCGCAATGGGGGAAACCCTGACGCAGCA  
ACGCCGCGTGAGGATGAAGTCTCTTGGGACGTAAACTCCTTTTCGATCGGGAAGATAATG  
ACGGTACCGATAGAAGAAGCCCCGGCTAACTTCGTGCCAGCAGCCGCGGTAATACGTAGG  
CAGCGAGCGTTGTTTCGGAATTACTGGGCGTAAGAGTGTGTAGGCGGTGTTCCAGTCTG  
TTGTGAAATCTCCCGGCTTAACCTGGGAGGGTGCAGCGGAACTAGAAATGCTAGAGGGTGG  
GAGAGGTAAGCGGAATTCCTGGTGTAGCGGTGAAATGCGTAGATATCAGGAGGAACACCT  
GTGGTGTAGACAGCTTACTGGACCACTTCTGACGCTGAGACACGAAAGCGTGGGTAGCAA  
ACAGGATTAGAAACCCGAGTAGTCC

>Otu14108

CCAGCCTACGGGGGGCTGCAGTGGGGAATATTGGACAAGGGGCGCAAGCCTGATCCAGCA  
ATGCCGCGTGAGTGATGAAGGCCTTAGGGTTGTAAAGCTCTTTACCGGGGACGATGATG  
ACGGTACCCGGAGAAGAAGCCCCGGCTAACTTCGTGCCAGCAGCCGCGGTAATACGAAGG  
GGGCTAGCGTTGTTTCGGAATTACTGGGCGTAAGCGCGCGTAGGCGGCGATTTAAGTCGG  
GGGTGAAAGCCCCGGGGCTCAACCTCGGAAATGCCTTCGAGACTGGATTGCTGGAGTGCGG  
AAGAGGGTCGTGGAATTCACAGTGTAGAGGTGAAATTCGTAGATATTGGGAAGAACACCG  
GTGGCGAAGGCGGCGACCTGGTCTGTAACCTGACGCTGAGGCGCGACAGCGTGGGGAGCAA  
ACAGGATTAGAAACCCCTGTAGTCC

>Otu14123

CCAGCCTATGGGTCGCTGCAGTCGAGGATCTTCGTCAATGGGCGCAAGCCTGAACGAGCG  
ACGCCGCGTGCGCGATGAAGGCCTTCGGGTGTAAAGCGCGAAAGTGAGAGAAAGGGAA  
ACTTGATCAATCCACAGTAAGGACGGGCTAAGTTCGTGCCAGCAGCCGCGGTAAGACGAA  
CTGTCCTAACGTTGTTTCGGAATCACTGGGCTTAAAGCGCGTGTAGGCGGGCCGCCACGTC  
GGCTGCTGAAATCCCCCGGCTCAACCGGGGAACGGGCACCGATACGAGCGGCCTTGAGGG  
GGGTAGGGGGGTCTGGAACCTCCGGTGGAGCGGTGAAATGCGTTGAGATCGGAAGGAACG  
CCCGTGGCGAAAGCGAGGCCCTGGACCCTTACTGACGCTGAGACGCGAAAGCCAGGGGAG  
CGAACGGGATTAGATAACCCCGTAGTCC

>Otu14126

CCAGCCTACGGGACGCAGCAGTGGGGAATCTTGACAATGGACGAAAGTCTGACGGAGCA  
ACACCGCGTGACAGGATGACGGCCTTCGGGTGTAAAGTCTTTTATTTGGGAAGAATATG  
ACGGTACCAAATGAATAAGGACCGGCTAACTACGTGCCAGCAGCCGCGGTAATACGTAGG  
GTCCAAGCGTTATCCGGAATCACTGGGCGTAAGCGTGCGTAGGTGGTAACCTTGCGTGCA  
GTGCGAAATTGTGTGGCTCAACCATAACAACGGTACTGCATACGGGGTTACTAGAGGACAT  
GAGAGGCAAGTGGAATTACTGGTGTAGCAGTGAAATGCGTAGATATCAGTAGGAACACCA  
ATGGCGAAGGCAGCTTGCTGGCATGTATCTGACGCTAAGGCACGAAAGCGTGGGGAGCGA  
ACAGGATTAGAAACCCCTGTAGTCC

>Otu14127

CCAGCCTATGGGAGGCTCCAGTGCGCAGTACGATGTGGAACCTACCGACGGTGTATAAGCA  
GCTCATCGCTCTCTTCCGGTCTATGCATAACCTCGTCCGAATTCTCCCGCTCTGGAAACT  
TCAACGCAAGCTGAAGAAACCCAATCGTACAGGCCGAAACGGGATGTCTCTCGAACTACG  
CATCAACTCCCCGAATCCCTTCACTCTTCGCACTCTACCGCCGCATCCTCTTCCACCTC

GACGTCCTATGATTCTCACTGCCCCGACTCGATCGACGGTTCACCTATCATACCCCTTAC  
GACTCCTTTTATCCAAGACCCCCAGCGCGAATCGGCTGGAGAGTTTCTCATTTCCCGGGAT  
CAACTACCCCTCGGCGAGCTCCGTGTCCAAACCAAGTATCGCGCGGAGAGTAACCTTAC  
ATTAGATACCCCACTAGTCC

>Otu14136

CCAGCCTACGGGAGGCTGCAGTGGGGAATATTGGACAATGGGCGCAAGCCTGATCCAGCC  
ATGCCGCGTGAGTGATGAAGGCCCTAGGGTTGTAAAGCTCTTTCGGTGGGGACGATGATG  
ACGGTACCCACAGAAGAAGCCCCGGCTAACTTCGTGCCAGCAGCCGCGGTAATACGAAGG  
GGGCTAGCGTTGCTCGGAATGACTGGGCGTAAAGGGCGCGTAGGCGGCTTGTATAGTCAG  
ATGTGAAATTCTGGGCTCAACCTGGGGACTGCATTTGATACGTGCAGGCTTGAGTGTGG  
AAGAGGGTCGTGGAATTCTCAGTGTAGAGGTGAAATTCGTAGATATTGGGAAGAACACCG  
GTGGCGAAGGCGGCGACCTGGTCCATAACTGACGCTGAGGCGCGAAAGTGCGGGGATCAA  
ACAGGATTAGAAACCCTTGTAAGTCC

>Otu14149

CCAGCCTATGGGTCGCTGCAGTCGAGAATTTTTCTCAATGGGCGAAAGCCTGAAGGAGCG  
ACGCCGCGTGGGGGATGAAGGCCTTCGGGTTGTAAACTCCTGTGAGGGGGAGGAAGGGG  
TAACCTTGACCGATCCCTGGAGGAAGCACAGGCTAAGTTCGTGCCAGCAGCCGCGGTAAG  
ACGAACCGTGCTAACGTTATTTCGAATCACTGGGCTTAAGGCGCGTGTAGGCGGATGGGG  
ACGTCGGTTGTTGAAAGCCCCGGCTTAACCGGGAACTGGCACCAGAAACGCCCCATCTG  
GAGGGACGTAGGGGGACCTGGAACCTCCGGTGGAGCAGTGAATGCGTTGAGATCGGAAG  
GAACGCCCGTGGCGAAAGCGAGGTCTTGGACGCTTCTGACGCTGAGACGCGAAAGCTAG  
GGGAGCGAACGGGATTAGAAACCCGAGTAGTCC

>Otu14152

CCAGCCTATGGGAGGCAGCAGTCGAGAATCTTCCGCAATGGACGAAAGTCTGACGGAGCG  
ACGTCGCGTGATTGATGAAGTCCTTAGGGACGTAAAGATCTTTTATGCGGGATGAAGTTT  
ATTGACAGTACCGCAAGAATAAGGGGCTCCTAATCTCGTGCCAGCAGGAGCGGTAATACG  
AGAGCCCCGAGCGTTATCCGGAATTATTGGGCGTAAAGGGTGCCTAGGTGGTTATGTTAG  
TCTTTTGTTAAATCTCCCGGCTTAACCGGGAAAAAGTGAAAGAAACGGCATAACTTGAGA  
GTAGAAGAGGCGTATGGAGCTTATGGTGTAGGGGTGAAATCCGTTGATATCATAGGGAAC  
ACCAAATGCGAAGGCAGTACGCTGGTCTATATCTGACACTCAAGCACGAAAGCGTGGGTA  
GCGAATGGGATTAGATACCCTAGTAGTCC

>Otu14161

CCAGCCTATGGGTGGCAGCAGCAAGGAATAGTAGGCAATGGGCGAAAGCCTGACCTCGCG  
ACGCCGCGTGAAGGATGAAGGCCTTCGGGTTGTAAACTTCTTTTTTTCAGGGATGAATAAT  
GACAGTACCTGGAGAATAAGTCACGGCTAACTACGTGCCAGCAGCCGCGGTAACACGTAG  
GTGGCGAACGTTATCCGGATTTACTGGGCGTAAAGAGTGCCTAGGTGGTTATTTAAGTCA  
GATGTAAAATCTCCTGGCTCAACTGGGAGGGACCATCTGATACTGGATAGCTAGAGTACA  
GCAGAGGAAAATGGAATTCCCGGTGTAGTGGTGGAAATGCGTAGATATCGGGAGGAACACC  
AGTGGCGAAAGCGGTTTTCTGGGCTGTTACTGACACTGTTGCACAAAAGCGTGGGGAGCA  
AACAGGATTAGATACCCTAGTAGTCC

>Otu14163

CCAGCCTACGGGAGGCACCAGCAAGGAATTTTTCGCAATGGGCGGAAGCCTGACGCAGCG  
ACGCCGCGTGGGGGATGACGGCCTTCGGGTTGTAAACCCCTTTTCTGAGGAAGAATTAT  
GACGGTACTCGGGGAATAAGTCTTGGCTAACTACGTGCCAGCAGCCGCGGTAATACGTAG  
GAGGCAAACGTTATTCGGATTTACTGGGCGTAAAGCGGGTGTAGACGGCCTTTTAAGTCG  
GTTGTGAAATCTCTTGACTTAATTGAGAGAAGACATCCGATACTACTAAGCTTGAGGACA  
GCAGAAGAAAGCGGAACCTCCCGGTGTAGCGGTGAAATGCGTAGATATCGGGAGGAACACC  
AGTGGCGAAGGCGGCTTTCTAGGCTGTTCTGACGTTGAGGCCCAAAAGCGTGGGTAGCG  
AAACGGATTAGATACCCTCGTAGTCC

>Otu14167

CCAGCCTATGGGTGGCTGCAGTCGAGAATCTTCCGCAATGGGCGAAAGCCTGACGGAGCG  
ACGTTACGTGGATGAAGAAGCTCTTCGGAGTGTAAGTCCTTTTATATGGGAGGAAGCCG  
CAAGGCAGACAGTACCATATGAATAAGGGGATCCTAATTCTGTGCCAGCAGGAGCGGTAA  
TACAGAATCCCCAAGCGTTACCCGATTTATTGGGCGTAAAGGGTCCGTAGGTGGCGTAG  
TAAGTTTTCGAGTTAAACTCATCGGCTTAACCTTTGAGCTGTTGAAAATACTGCTACACT  
AGAGGGCGGTTAGGGGTTAGCGGAACCGACGGAGTAGGGGTGAAATCCGTTGATATCGTCG  
GGAGCACCAAAAAGCGAAGGCAGCTAACTAGGACGACCCTGACACTGAGGGACGAAAGCGT  
GGGAGCAAAAAGGATTAGAAACCCGAGTAGTCC

>Otu14170

CCAGCCTACGGGGTGCTCCAGTCGAGGATCATTCGCAATGGGCGAAAGCCTGACGATGCG  
ACGCTGCGTGAGGATGAAGGCCGTCGGGTTGTAACTCCTGTCATGAGGGGAAAAGGTG  
CCGGGTGTGAACAGCATCCGGCCTCGATGGTACCTCAAGAGGAAGCCACGGCCAACCTCTG  
TGCCAGCAGCCGCGGTAATTCAGAGGTGGCGAGCGTTGTTTCGGATTTACTGGGCGTAAAG  
GGCGCGTAGGCGGTTCCGTATGTCGAGTGTGAAATCTCCGGGCTCAACCCGAAAGTGCG  
CTCGAAACTGCGGTCCTCGGGCATGGTATGGGAGAGCGGAATACACGGTGTAGCGGTGAA  
ATGCGTTGATATCGTGTAGAACACCGGTGGCGAAGGCGGCTCTCTGGAACATGTCTGACG  
CTGAGGCGCGAAAGTTGGGGGAGCGAACAGGATTAGAAACCCAGTAGTCC

>Otu14182

CCAGCCTACGGGGCGCAGCAGTCGAGAATTTTTTCAATGGGCGCAAGCCTGATGGAGCG  
ACGCCGCGTGGGGGATGAATGGCTTCGGCCCGTAAACCCCTGTCATTTGCGATCAAACCT  
CGTTATTTTAAAAGATGACGAGCTGATAGTACCGCAAGAGGAAGAGACGGCTAACTCTGTG  
CCAGCAGCCGCGGTAATACAGAGGTCTCAAGCGTTGTTTCGGATTCATTGGGCGTAAAGGG  
TGCGCAGGCGGCGTGAAAGTTGAGTGTGAAATCCCGGGGCTTAACCCCGAACTGCACT  
CAATACTCCCATGCTAGAGGAATGTAGAGGAGAGTGGAATTCACGGTGTGGCAGTGAAAT  
GCGTAGATATCGTGAGGAAGACCAGTTGCAAAGGCGACTCTCTGGGCATTTCTTGACGCT  
CATGCACGAAGGCCAGGGGAGCAAACGGGATTAGATACCCGAGTAGTCC

>Otu14194

CCAGCCTATGGGACGCTGCAGTCAGGTATCTTTTGCAATGCGCGTAAGCGTGACAAAGCG  
AGCCAGAGTGTTTCTCTTTGAGAACTTTTGCCAGCTGTAAAAGGCTGGCGAATAAGGA  
CTGGGCAAGATCGGTGCCAGCCGCCGCGGTAATCCCGACGGTCCAAGTCGCAGCCACAAT  
TATTGGGTCTAAACATCCGTAGCTTGTTTCTTAAGTCTCTTGTGAAATCTGGCATCTTA  
AGTGTGCGACGTGCAAGAGATACTGGGAAGCTAGAGACTGGAGGACGTGAAGAGTACAGT  
TGAGGTAGTGGTAAAATACGTTAATCTTAAGTGGACTAACAATAGCGAAGGCACTTTACG  
ACGACAGATCCGACAGTGAGGGATGAAAGCGAGGGGCGCAAAAAGGATTAGAAACCCAG  
TAGTCC

>Otu14199

CCAGCCTACGGGAGGCACCAAGTGGGGAATATTGGACAATGGGGGAAACCCTGATCCAGCC  
ATGCCGCGTGAGTGATGAAGGCCCTTCGGGTTGTAAAGCTCTTTTGGTGGGGACGATGATG  
ACGGTACCCACAGAATAAGCTCCGGCTAACTTCGTGCCAGCAGCCGCGGTAATACGAAGG  
GAGCTAGCGTTGTTCCGAATTACTGGGCGTAAAGGGCGCGTAGGCGGTCCGATAAGTCAG  
ATGTGAAAGCCCTGGGCTCAACCCGGGAAGTGCCTTTGATACTATCGGTCTTGAATTCGG  
GAGAGGTTGGTAGAATTGCCAGTGTAGAGGTGAAATTCGTAGAGATTGGCAAGAATACCC  
GTGGCGAAGGCGGCCAACTGGACCGACATTGACGCTGAGGCGCGAAAGCGTGGGGATCAA  
ACAGGATTAGAAACCCTCGTAGTCC

>Otu14211

CCAGCCTATGGGGCTGCAGTCGAGAATATTCCTCAATGGACGAAAGTCTGAAGGAGCGAC  
GCCGCGTGCGGGATGAAGGGCTTCGGCTCGTAAACCGCTTTTCTTAGGGAAGAATTCATG  
ACGGTACCTAAGGAATAAGAGGTTGCTAACTCTGTGCCAGCAGCAGCGGTAATACAGAGA  
CCTCAAGCATTATCCGGATTTATTGGGCGTAAAGGGTCCGCAGGCGGTCGTGTTTGTGCA  
TGGTTAAATCATCGGGCTCAACCCGGTGGCTGCTGTGAAACGGCACGACTAGAGGGTGG  
GAGAGGTACGCGGAATTGCCGGTGTAGTAGTAATATGCGTTGATATCGGCAAGAACACCA  
AATGCGAAGGCAGCGTACTAGAACACACCTGACGCTCAGGGACGAAAGCGTGGGGAGCGA  
AAGGGATTAGATACCCTAGTAGTCC

>Otu14212

CCAGCCTATGGGTTGCAGCAGTTAGGGATTTTTTGCAATGCGCGTGAGCGTGACAGAGCG  
AGCCAGAGTGATTTTCCATACTGGAAAATCTTTTGCCAGCTGTAAAAGGCTGGCGAATA  
AGGACTGGGCAAGACCGGTGCCAGCCGCCGCGGTAATCCCGGCAGTCCAAGTCGCAGCCA  
CAATTATTGGGTCTAAACATCCGTAGCTTGCTTTGTAAGTTTGTGTGAAATCTGTCT  
CTTAAGGGCAGAGATTGCAATAAATACTGCTTAGCTAGAGACCGGTGGGCGTAAGAAGTA  
CATCTGAGGTAGTGGTAAAATACGTTAATCTCAGGTGGACTAACGATTAGCGAAGGCATC  
TTACGATGACGGTTCTGACAGTGAGGGATGAAGGCTAGGGGCGCAAACAGGATTAGATAC  
CCTCGTAGTCC

>Otu14214

CCAGCCTATGGGTTGCTGCAGTGGGGAATTTTTGCGCAATGGGGGAAACCCTGACGCAGCA  
ACGCCGCGTGAGTGATGAAGGCCCTTCGGGTCGTAAAGCTCTGTCAGAGGGAAAGAAGTGT  
AGGAGGGTTAATACCCCTTTTACTTGACGGTACCCTCAAAGGAAGCACCGGCTAACTCCG

TGCCAGCAGCCGCGGTAATACGGAGGGTGCGAGCGTTGTTTCGGAATTATTGGGCGTAAAG  
CGAACGCAGGCGGCTTGGTAAGTCAGAGGTGAAAGTCCACAGCTTAACTGTGGCACTGCC  
TTTGATACTGCCTTTCTTGAGTGCATGAGGGGGAAGCGGAATTCCGAGTGTAGAGGTGAA  
ATTCGTAGATATTCGGAGGAACACCGGTGGCGAAGGCGGCTTCCTGGCATGTAAGTACG  
CTCATGTTTCGAAAGCGTGGGGAGCAAACAGGATTAGAGACCCTCGTAGTCC

>Otu14220

CCAGCCTATGGGTGGCTGCAGTGGGGAATATTGCGCAATGGGGGAAACCCCTGACGCAGCA  
ACGCCGCGTGAGTGATGAAGGCCTTCGGGTGTAAAGCTCTGTCAGGTGGAACGAATAAC  
GTAAAGTTAACAGCTTTACGTCTGACGGTACCGCCAAAGGAAGCACCGGCTAACTCTGTG  
CCAGCAGCCGCGGTAAGACAGAGGGTGCAAGCGTTGTTTCGGAATTACTGGGCGTAAAGGG  
TGTGTAGGTGGCATAGCATGTCGGATGTGAAATCCACAGCTTAACTGTGGAAGTGCATT  
CGAAACTGCTAAGCTCGAGTCTGGAAGAGGGGAAGTGAATTTCCAGTGTAGAAGTGAAT  
TCGTAGATATTGGGAGGAACACCGGCAGCGAAGGCGACTTCCTGGTCCAGTACTGACACT  
GAGACACGAAAGCGTGGGTAGCAAACAGGATTAGAAACCCCGGTAGTCC

>Otu14222

CCAGCCTATGGGAGGCAGCAGTGGGGAATTTTGACAATGGGGGCAACCCCTGATCCAGCA  
ACGCCGCGTGAAGGACGAAGGTCTTCGGATTGTAAACTTCTTTTGTAGGGGACGAATCAC  
GCCGTGAATAACGGCGAATGACGGTACTCTACGAATAAGCCACGGCTAACTTCGTGCCAG  
CAGCCGCGGTAATACGAAGGTGGCAAGCGTTACTCGGAATTACTAGGCGTAAAGCGCAGG  
TAGGTGGTTAGGTAAGTCCGTAATGAAATCTCCCGGCTTAACTGGGAGGGGTTTATGGAT  
ACTGCTTGACTGGAGTGTGGGAGAGGATGCTGGAATTCCTGGTGTAGCGGTGAAATGCGT  
AGAGATCGGGAGGAACACCAATGGCGAAAGCAGGCATCTGGCCCAATACTGACACTGAGC  
TGCGAAAGCTAGGGGAGCAAACAGGATTAGATACCCCGTAGTCC

>Otu14223

CCAGCCTATGGGTCGCAGCAGTGGGGAATTTTGCGCAATGGGCGAAAGCCTGACGCAGCA  
ACGCCGCGTGGGTGATGAAGGTCTTCGGACTGTAAACCCCTGTCGCCAGGGACGAAGGTG  
CGCATGTTAATAGCGTGTGCGCTTGACGGTACCTGGAGAGGAAGCCCCGGCTAACTCTGT  
GCCAGCAGCCGCGGTAATACAGAGGGGGCAAGCGTTATTTCGGAATTATTGGGCGTAAAGC  
GCGTGTAGGCGGTTTTTTAAGTCTGATGTGAAAGCCCTGGGCTCAACCCGGGAAGTGCAT  
TGGAAGTGGGAGACTTGAATACGGGAGAGGGCAGTGAATTCCTGGTGTAGGAGTGAAA  
TCCGTAGATATCAGGAGGAACACCGGTGGCGAAGGCGGCTGCCTGGACCGATATTGACGC  
TGAGACGCGAAAGCGTGGGGAGCAAACAGGATTAGAGACCCCGTAGTCC

>Otu14236

CCAGCCTACGGGACGCAGCAGTAGGGAATTTTGCGCAATGGACGAAAGTCTGACGCAGCG  
ACGCCGCGTGAGGGATGAAGGTCTTCGGATTGTAAACCTCTGTTGAGTGGGAAGAAAACG  
TTTGCAGGTAATATCTGCAGATTTTGACGGTACCGCTCGAGGAAGCCCCGGCTAACTACG  
TGCCAGCAGCCGCGGTAATACGTAGGGGGCAAGCGTTGTTTCGGAATTACTGGGCGTAAAG  
GGAGTGTAGGCGGGAAGGTAAGTTAGAAGTTAAAGCATCAGGCTTAACTGATATCTGCT  
TTTAAGACTGCCTTTCTTGAGTATGGGAGAGGGTGATGGAATTCAGGTGTAGCGGTGGA  
ATGCGTAGATATCTGGAAGAACACCAGCTGCGAAGGCGGTCACCTGGCCCAATACTGACG  
CTGAGGCTCGAAAGCTAGGGGAGCAAACAGGATTAGAGACCCGAGTAGTCC

>Otu14239

CAGCCTATGGGGGCACCAGTAGGGAATATTGCATAATGGGCGCAAGCCTGATGCAGCAAC  
GCCGCGTGCGGATGAAGGCCTTCGGGTGTAAGCGCTTTTCAGAGGGATGAGGAAGGA  
CAGTACGTCTGGAATAAGTCTCGGCTAACTACGTGCCAGCAGCCGCGGTAAACGTAGGA  
GGCGAGCGTTATCCGGATTTACTGGGCGTAAAGCGCGTGCAGGCGGTTTGAAAGTTGGA  
TGTGAAAGCTCCCGGCTCAACTGGGAGAGGTGTCCTCAAACTTCCAGACTTGAGGATGGT  
AGAGGGAGGTGGAATTCGGGTGTAGTGGTGAATGCGTAGATATCGGGAGGAACACCAG  
TGGCGAAAGCGGCCCTCTGGACTGTTTCTGACACTCAGACGCGAAAGCTAGGGTAGCAAA  
CGGGATTAGAAACCCCGTAGTC

>Otu14245

CCAGCCTATGGGGTGCAGCAGTGGGGAATATTGGACAATGGGCGAAAGCCTGACCCAGCA  
ACGCCGCGTGAGGGATGAAGCCCCTCGGGGTGTAAACCTCTGTAAGGAGGGAAGAAAACA  
ATGACGGTACTTCCAAAGTAAGCCCCGGCTAACTCCGTGCCAGCAGCCGCGGTAATACGG  
AGGGGGCAAGCGTTACTCGGAATCACTGGGCGTAAAGCGCACGTAGGCGGCCCGGCTAAGT  
CTCTCGTTTAAATCCCGTCGCTCAACGACGGACCAGCGGGAGATACTGGCGGGCTTGAGGA  
CTGGAGAGGAGAGCGGAATTCCTGGTGTAGCGGTGAAATGCGTAGATATCGGGAGGAACA  
CCAGTGGCGAAGGCGGCTCTCTGGACGGTCACTGACGCTGAGGTGCGAAAGCCAGGGGAG

CGAACGGGATTAGAAACCCCTTGTAGTCC

>Otu14250

CCAGCCTATGGGGGGCTCCAGTGGGGAATATTGGGCAATGGGCGAAAGCCTGACCCAGCG  
ACGCCGCGTGGGTGATGAAGGCCTTCGGGTGTAAAGCCCTGTCATGCGGAAAGAACAGT  
CTTACGGTTAATACCCGTGGGATTTGACGGTACCGCAGGAGGAAGCACCGGCTAACTTCG  
TGCCAGCAGCCGCGGTAATACGGAGGGTGCAAGCGTTGTTTCGGAATTATTGGGCGTAAAG  
GGCGCGTAGGCGGTAATGAAAGTCAGATGTGAAATACTTCGGCTCAACTGGAGAAGTGA  
TCTGAAACTTCATAACTAGAGTACGGAAGAGGGAAATGGAATTCGCGGTGTAGAGGTGAA  
ATTCGTAGATATCGGGAGGAACACCAGTGGCGAAGGCGATTTCTTGGTCTGGTACTGACG  
CTGAGGCGCGAAAGTGTGGGGAGCAAACAGGATTAGAAACCCGAGTAGTCC

>Otu14252

CCAGCCTACGGGTGGCAGCAGTCGAGAATATTCCACAATGGGCGAAAGCCTGATGGAGCG  
ACGCCGCGTGCAGGATGAAGGTCTTAGGATTGTAAACTGCTTTTCTACGGGAAGAAGATG  
CGTTGAGCATAATGACGGTACCGTAGGAATAAGTGGCTGCAAACCTTCGTGCCAGCAGCCG  
CGGTAATACGAAGGCCACAAGCGTTATCCGGATTTATTGGGCGTAAAGGGCGCGTAGGTG  
GTTTTGCAAGTCTTTTGTAAATACCGGAGCTTAACTTCGGAAGTGCAAGAGATACTGCA  
AAACTAGAGGGTGTAGAGGCATATAGAACGCACGGTGTAGGGGTGAAATCCGTTGATAT  
CGTGCGGAATACCAAAGGCGAAGGCAATATGCTGGGACATTCCTGACACTGAGGCGCGAA  
AGCGTGGGGAGCAAAAAGGATTAGAAACCCCTGGTAGTCC

>Otu14264

CCAGCCTACGGGTCGCAGCAGTGGGGAATATTGCGCAATGGGCGAAAGCCTGACGCAGCA  
ACGCCGCGTGTGTGATGAAGGTCTTCGGATCGTAAAGCACTGTCGGGAGGGACGAATAAG  
GGCCGCAGTAATATGGCGGTTTGTGACGGTACCTCCAAAGGAAGCACCGGCTAACTCTG  
TGCCAGCAGCCGCGGTAATACAGAGGGTGCAAGCGTTGTTTCGGAATTATTGGGCGTAAAG  
CGCGTGTAGGCGGCCAGACCAGTCCGGTGTGAAAGCCCTCGGCTTAACCGAGGAAGTGCG  
CCCGAAACTATTTGGCTTGAGTACCGGAGAGGATGGTGGAATTCCCGGTGTAGAGGTGAA  
ATTCGTAGATATCGGGAGGAACACCAGTGGCGAAGGCGACCATCTGGACGGATACTGACG  
CTGAGACGCGAAAGCGTGGGGAGCAAACAGGATTAGAGACCCGTGTAGTCC

>Otu14265

CCAGCCTATGGGAGGCAGCAGTAACGAATCTTCCGCAATGCACGAAAGTGTGACGGAGCG  
ACGCCGCGTGTGGGACGAAGTTCTTCGGAATGTAAACCACTGTCAGGGGTAAAGAAAGTTC  
TGATCTACCCAGAGGAAGGCACGGCTAACTCTGTGCCAGCAGCCGCGGTAAGACAGAGG  
TGCCGAGCGTTAGGCGGAATCACTGGGCTTAAAGCGTGTGTAGGCGGGTCCGTAAGTACC  
TTGTGAAATCCCACGGCTCAACCGTGGAAGTCTTGGTATACTGCGGATCTTGAGCCACC  
TAGGGGCAAGTGGAACAAACGGTGGAGCGGTGAAATGCGTAGATATCGTTTGGAACGCCA  
ATGGTGAAAACAACCTTGCTGGGGGTGTGCTGACGCTGAGACACGAAAGCCAGGGGAGCAA  
ACGGGATTAGAAACCCGCGTAGTCC

>Otu14267

CCAGCCTACGGGTCGCACCAGTCGAGAATCTTCCGCAATGGACGAAAGTCTGACGGAGCG  
ACGTTACGTGAATGATGAAGCCCTTCGGGGTGTAAAGTCTTTTATTTGGGAGGAAAGCC  
GCAAGGCTGGACAGTACCAGATGAATAAGGGGATCCTAATTCTGTGCCAGCAGGAGCGGT  
AATACAGAATCCCCGAGCGTTACCCGATTTATTGGGCGTAAAGGGCCCGTAGGTGGTAA  
GGTAAGTTGAAAGTTAAATCTCATCGGCTTAACCTTTGAGGTGCTTTCAATACTGCTATA  
CTAGAGGGCGTTAGAGGTTAGCGGAACCGACGGAGTAGGGGTGAGATCCGTTGATATCGT  
CGGGAACACCAAAAGCGAAGGCAGTTAACTAGGACGACCCTGACACTGAGGGACGAAAGC  
GTGGGGAGCAAACAGGATTAGAAACCCCGTAGTCC

>Otu14275

CCAGCCTATGGGGGGCAGCAGTGGGGAATTTTGGACAATGGGGGCAACCCTGATCCAGCC  
ATGCCGCGTGCGGGAAGAAGGCCCTTCGGGTGTAAACCGCTTTTAGTCGGGAAGAAAAGG  
GCGAGGCTAATACCTTCGTCACCTTGACGGTACCGGCGGAATAAGCACCGGCTAACTACGT  
GCCAGCAGCCGCGGTAATACGTAGGGTGCGAGCGTTAATCGGAATTACTGGGCGTAAAGC  
GTGCGCAGGCGGTTTCGTTAAGTTCGTCGTGAAAGCCCCGGGCTCAACCTGGGAATGGCGA  
TGGAAGTGGCGGGCTGGAGTGTGGCAGAGGGGGGTGGAATTCGCGGTGTAGCAGTGAAA  
TGCGTAGAGATGCGGAGGAACACCGATGGCGAAGGCAGCCCCCTGGGCCAACACTGACGC  
TCAGGCACGAAAGCGTGGGGAGCAAACAGGATTAGAAACCCGCGTAGTCC

>Otu14278

CCAGCCTATGGGACGCTGCAGTGAGGAATATTGCTCAATGGGCGAAAGCCTGAAGCAGCA  
ACGCCGCGTGCACGATGAAGGTCTTCGGATCGTAAAGTGCTTTTGTAGAGGGACGAGATAG



GACGGTACCTCTTGAATAAGTCACGGCTAACTACGTGCCAGCAGCCGCGGTAAAACGTAG  
GTGGCAAGCGTTATCCGGATTTCGCTGGGCGTAAAGCGAGTGCAGGTGGTTGTGTAAGTTG  
GATGTGAAATTTCCCGGCTTAACCGGGAAGGGTCATTCAATACTGCGCGACTTGAGGGCA  
GAAGAGGGGGGTGGAATTGCCGGTGTAGTGGTGAATGCGTAGATATCGGCAGGAACACC  
TGTGGCGAAAGCGGCCCTTGGTCTGCTCCTGACACTCAGACTCGAAAGCTAGGGTAGCG  
AACGGGATTAGAAACCCTTGTAGTCC

>Otu14291

CCAGCCTACGGGTGGCTCCAGTGGGGAATCTTGCACAATGGAGGAACTCTGATGCAGCG  
ACGCCGCGTGAGCGATGAAGCCCTTCGGGTGTAAAGCTCTTTTGTGCGGAAGATAATG  
ACGGTACCGCAAGAATAAGCCCCGGCTAACTTCGTGCCAGCAGCCGCGGTAATACGAAGG  
GGGCTAGCGTTGCTCGGAATCACTGGGCGTAAAGGGTGCCTAGGCGGGTCTTTAAGTCAG  
AGGTGAAATCCTGGAGCTCAACTCCAGAACTGCCTTTGATACTGAGGATCTTGAGTTCGG  
GAGAGGTGAGTGGAAGTGCAGTGTAGAGGTGAAATTCGTAGATATTCGCAAGAACACCA  
GTGGCGAAGGCGGCTCACTGGCCCGGTACTGACGCTGAGATGCGAAAGCGTGGGGAGCAA  
ACAGGATTAGATACCCCAGTAGTCC

>Otu14320

CCAGCCTATGGGGCGCACCCAGTAAGGAATATTGGACAATGGACGCAAGTCTGATCCAGCC  
ATGCCGCGTGAGGATTAAGGTCCTCTGGATTGTAAACTCTTTTATATGGGACGAAAAA  
AGGGAATTCTTTCCCTCTTGACGGTACTGTATGAATAAGCACCGGCTAACTCCGTGCCAG  
CAGCCGCGGTAATACGGAGGGTGCAAGCGTTATCCGGATCACTGGGTTTAAAGGGTGC  
TAGGCGGCCCTGTAAGTCAGTGGTGAATACGGCAGCTCAACTGTGAGGTGCCATTGAT  
ACTGCAGGGCTTGAGTACAGACGAGGTAGGCGGAATTGACGGTGTAGCGGTGAAATGCTT  
AGATATCGTCAAGAACACCGATAGCGAAGGCAGCTTACTAGACTGTAAGTACGCTGAGG  
CACGAAAGTGCGGAGATCAAACAGGATTAGAAACCCTCGTAGTCC

>Otu14323

CCAGCCTATGGGTTGCAGCAGTGGGGAATATTGGACAATGGGGGCAACCCTGATCCAGCG  
ATGCCGCGTGAGTGAAGAAGGCCTTCGGGTGCTAAAGCTCTTTAGGTTGGGAAGAAGGAT  
GTTTGGGGATAATCCAGACATTTTGACGGTACCGACAGAATAAGCACCGGCAAACTCTGT  
GCCAGCAGCCGCGGTAATACGGAGGGTGCGAGCGTTAATCGGAGTTACTGGGCGTAAAGG  
GCGCGTAGGCGGTGATGTGAGTGTGATGTGAAAGCCCCGGGCTTAACCTGGGAAGTGCAT  
CGCAAACGACATGACTGGAGTAGATGAGAGGGTGGCGGAATTTCCGGTGTAGCGGTGAAA  
TGCGTAGAGATCGGAAGGAACGTCAATGGCGAAGGCAGCCACCTGGCATCATACTGACGC  
TGAGGCGCGAAAGCGTGGGGAGCAAACAGGATTAGAGACCCTCGTAGTCC

>Otu14332

CCAGCCTATGGGGTGCAGCAGTGGGGAATATTGGACAATGGGTGAGAGCCTGATCCAGCC  
ATGCCGCGTGACAGGAAGAAGGCCTTCTGGGTGTAAACTGCTTTTGCCAGGGGATAAAAG  
GCCCTTGCGAGGGAACCTTGAAGGTACCTGGTGAATAAGCCACGGCTAACTACGTGCCAGC  
AGCCGCGGTAATACGTAGGTGGCAAGCGTTGTCCGATTTATTGGGTTTAAAGGGTGCCT  
AGGCGGTTTGACAAGTCTGATGTGAAATCCCGCAGCTTAACTGCGGAACTGCATTGGAAA  
CTGTCTGGCTAGAGGAATGGAGGGGAGACTGGAATACTTGGTGTAGCAGTGAATGCGTA  
GATATCAAGTGAACACCAGTGGCGAAGGCGAGTCTCTGGACATTTCTGACGCTGAGGC  
ACGAAAGCCAGGGGAGCAAACGGGATTAGATACCCTGGTAGTCC

>Otu14335

CCAGCCTATGGGTTGCTCCAGTTAGGAATATTGGACAATGGGCGCAAGCCTGATCCTGCC  
ATGCCGCGTGAGTGATGAAGGCCTTCGGGTGTAAAGCTCTTTAGTCCACGAATATAATG  
ACTGTAGTGGAAGAATAAGCCCCGGCTAACTTCGTGCCAGCAGCCGCGGTAATACGAAGG  
GGGCGAGCGTTATTCGGAATCACTGGGCGTAAAGCGTGCCTAGGCGGCTCTAAAAGTTAG  
GAGTGAAAGCCCCAGGCTCAACTTGGGAATTGCTTTTAATACTGTAGAGCTTGAATTTGG  
GAGAGGATAGCGGAATTGTCAGTGTAGCAGTGAATGCGTAGATATTGACAGGAACACCG  
GTGGCGTAAGCGGCTATCTGGACCAACATTGACGCTGAGGCACGAAAGCGTGGGGATCAA  
ACAGGATTAGATACCCTGGTAGTCC

>Otu14338

CCAGCCTACGGGGTGCTCCAGTGGGGAATTTTCGCAATGGGGGCAACCCTGACGAAGCA  
ACGCCGCGTGGGTGATGAAGTATCTTGGTACGTAAAGCCCTTTTCGACGGGAAAGAAAGCC  
GCAAGGTTTGACGGTACCCGTGGAAGAAGCCCCGGCTAACTCCGTGCCAGCAGCCGCGGT  
AATACGGGGGGGGCAAGCGTTGTTTCGGAATTACTGGGCGTAAAGGGCGCGTAGGCGGTTT  
GCTAAGTTGGATGTGAAAACCTCTGGGCTTAACCCAGAGCCTGCATTCAAACTGACAGGC  
TAGAGTTCTGGAGGGGATAGCGGAATTCTTGGTGTAGCGGTGAAATGCGTAGATATCAGG

AGGAACACCGGTGGCGAAGGCGGCTATCTGGACCATAACTGACGCTGAGGCACGAAAAGCT  
AGGGGAGCAAACAGGATTAGAAACCCTCGTAGTCC

>Otu14361

CCAGCCTATGGGGTGCACCAGTGGGGAATATTGGGCAATGGGCGCAAGCCTGACCCAGCC  
ATGCCGCGTGTGCGATGAAGGTCTTCGGATCGTAAAGCACTGTCGCGAGGGAAAAAGAAA  
GTGATGGTACCTCGAGAGGAAGCACCGGCTAACTCTGTGCCAGCAGCCGCGGTAATACAG  
AGGGTGCAGAGCGTTGTTTCGGAATTATTGGGCGTAAAGCGCTGGTAGGTGGCTCGAAAAGT  
CGCTTGTGAAAGCTTCCGGCTCAACCGGAAAAGTGCGGGCGAACTGGCGAGCTTGAGTG  
ACGGAGAGGGTCGCGGAATTCCCGGTGTAGAGGTGAAATTCGTAGATATCGGGAGGAACA  
CCAGAGGCGAAGGCGGCGACCTGGAAGTCCACTGACACTGAGCAGCGAAAGCGTGGGGAG  
CAAACAGGATTAGAAACCCGAGTAGTCC

>Otu14368

CCAGCCTATGGGGTGGCACCAGTAGGGAATTTTCCACAATGGGCGCAAGCCTGATGGAGCA  
ACGCCGTGTGAGGGATGAAGGATTTTCGGTCTGTAAACCTCTTTGGAGCGGGAAGAACGGC  
TTCGTGGTGAATAATCATGGAGCGTGACGGTACCGCTAGAACAAGACACGGCTAACTTCG  
TGCCAGCAGCCGCGGTAATACGAAGGTGTGCAACGTTGTCCGGAATTATTGGGCGTAAAG  
GGCGCGTAGGCGGCCAGGTAAGTCAGATGTGAAAGCTCTGGGCTCAACCCAGGAATTGCA  
TTTGAAACTGCTTGGCTCGAGTTCGGTAGAGGGGCGGAATTCCTGGTGTAGCGGTGAA  
ATGCGTAGATATCAGGAGGAACACCTGTGGCGAAAGCGGCTCACTGGACCACAACCTGACG  
CTGATGCACGAAAGCTAGGGGAGCAAACAGGATTAGATACCCCAGTAGTCC

>Otu14374

CCAGCCTACGGGGCGCTCCAGTCGAGGATCTTCGGCAATGGGCGCAAGCCTGACCGAGCG  
ACGCCGCGTGTGCGATGAAGGCCTTCGGGTGTAAAGCACTGTCGAGGGGGAGGAAGCCG  
CAAGGTTGACCTATCCCTGGAGGAAGCACGGGCTAAGTTCGTGCCAGCAGCCGCGGTAAG  
ACGAACCGTGCGAACGTTGTTTCGGAATCACTGGGCTTAAAGGGCGCGTAGGCGGCAGATC  
AAGTCCGGGATGAAATCTTTTCGGCTTAACCGGAAAAGTGCCTTGGATACTGATTTGCTCG  
AGGGAGGTAGGGGCATGTGGAACCTCCGGTGGAGCGGTGAAATGCGTTGATATCGGAAGG  
AACTCCGGTGGCGAAAGCGACGTGCTGGACCTCTTCTGACGCTGAGGTGCGAAAGCTAGG  
GGAGCAAACAGGATTAGATACCCCCGTAGTCG

>Otu14388

CCAGCCTACGGGAGGCTGCAGTGAGGAATATTGGTCAATGGACGCAAGTCTGAACCAGCC  
ATGCCGCGTGAAGGATGAAGGCCTTCTGGGTGTAAACTCTTTTATGGGGGAAGAAAAC  
TACGTTTCTACTGTAGCCGACGGTACCCTAGGAATAAGCACCGGCTAACTCCGTGCCAG  
CAGCCGCGGTAATACGGAGGGTGCAAGCGTTATCCGGATTTACTGGGTTTAAAGGGTGTG  
TAGGCGGACTTTTAAGTCAGTGGTGAATCTCCGGGCTCAACCCGGAACTGCCATTGAT  
ACTATTAGTCTTGAATTTTGTGAGGTAGGCGGAATAAGTCATGTAGCGGTGAAATGCAT  
AGATATGACTTAGAACACCAATTGCGAAGGCAGCTTGCTAAACAAATATTGACGCTGAGG  
CACGAAAGCGTGGGGAGCAAACAGGATTAGAGACCCCAGTAGTCC

>Otu14398

CCAGCCTATGGGAGGCAGCAGTCGAGAATCTTGGTCAATGGGCGCAAGCCTGAACCAGCG  
AAGTTACGTGGGTGATGACGGCTCTTTGGTCTGTAAACCCCGGAACTCAGGTCACATTTCG  
AGGCCTGAGGGATGAAGTTCAGACTAACTGCCGTGCCAGCAGTCGCGGTAAATCGGCGTG  
AGCGAGTGTTGATGTAAATGGGCGTAAAGGATCCGTAGGCGGTCTCGGAAGGTTCCGGTG  
TTAAGCTCTGTGCCCCAGTAATTGGGAGCACTTTGCGCCAACTACCACGAGACTTGAGGG  
AGGCAGGGGGAAGTGAAATACTCGAGCGACGGCTAAAATCGGTAGACCTCGAGTGGAACA  
CCAGTGGCGAAGGCGACTTCCTGGGCCTCACGATGTATATTTTAGGGTTAAACCTTAAAT  
ACGTAGTTAACCTGACGCTGAGGGATGAAAGTTGGGGTATCGAAGCGGATTAGAGACCCC  
CGTAGTCC

>Otu14407

CCAGCCTACGGGTCGCACCAGTGGGGAATATTGCGCAATGGGCGAAAGCCTGACGCAGCA  
ACTCTGCGTGAGGGATGAAGTCCTTCGGGACGTAAACCTCTTTTGTGCGGGGACGAAAGCC  
CGCAAGGGTTTGACGGTACTCGGCGAATAAGCCACGGCTAACTACGTGCCAGCAGCCGCG  
GTAAGACGTAGGTGGCGAGCGTTATTCGGAATTACTAGGCGTAAAGCGAGTGTAGGCGGG  
CGCTTAAGTCCGTCTGTGAAATCTCCCGGCCCACTGGGAGGGGTGATGGATACTGGGCG  
TCTAGAGTGGGGTAGGGGTGGCGGAATTCCTGGTGTAGCGGTGAAATGCGTAGATATCG  
GGAGGAACACCTATGGCGAAAAGCAGCTGCCTGGGCCCTTACTGACGCTGAGACTCGAAAG  
CTAGGGGAGCAAACAGGATTAGAAACCCGTGTAGTCC

>Otu14416

CCAGCCTATGGGTGGCAGCAGTGGGGAATCTTGCGCAATGGGCGAAAGCCTGACGCAGCG  
ACGCCGCGTGAGGATGAAGGTCTTCGGATTGTAACTTCTGTAAAGTGGGAGGAAATGC  
CGTTTTCTAATAACAAACCGGAGCTGACTGTACCATTAGAGAAAGCACCGGCTAAACTCGT  
GCCAGCAACCGCGGTAATACGAGTGGTGCAAGCGTTATTCGGAATCATTGGGCGTAAAGG  
GCGTGTAGACGGCATGTTAAGTCAACTGTTAAATTCTCCGGCCTAACCGGAGGCCTGCAG  
TAGATACTGGCTGTGCTAGAGTGTGGAAGAGAGAGGCGGAATTCTCGGAGTAGCGGTAAA  
ATGCGTAGATCTCGAGAGGAACACCAATGGCGAAGGCAGCCTCTTGGTCCATTTCTGACG  
TTGAAACACGAAAGCGTGGGGAGCAAACAGGATTAGAAACCCCCGTAGTCC

>Otu14421

CCAGCCTACGGGAGGCTGCAGTCGAGAATATTTCCCAATGGGCGAAAGCCTGAGGGAGCG  
ACGCCGCGTGAGGATGAAGGGCTTCGGCTCGTAAACTACTTTTGCCGAGGAAGAATCAT  
GACGGTACTCGGAGAATAAGAGGTTGCTAACTCTGTGCCAGCAGCAGCGGTAATACAGAG  
ACCTCAAGCATTATCCGGATTTATTGGGCGTAAAGGGTCCGCAGGTGGCCAAGCGCGTCA  
TCGGTTAAATGTCCGGGCTCAACCCGGACACCGCCGACGATACGGCTAGGCTCGAGAGTG  
GGAGAGGCAAGCGGAATTACCGGTGTAGTAGTAAAATGCGTTTATATCGGTAAGAACACC  
AAATGCGAAGGCAGCTTGCTGGAACACTTCTGACACTCAGGGACGAAAGTGTGGGTAGCG  
AAAGGGATTAGATACCCCCGTAGTCC

>Otu14424

CCAGCCTATGGGTGGCACCAGTCGAGGATCTTCGGCAATGGGCGCAAGCCTGACCGAGCG  
ACGCCGCGTGCGCGATGAAGGCCTTCGGGTGTAAAGCGCTGTGAGGGGGAGGAAGCCG  
CAAGGTTGACCTATCCCTGGAGGAAGGACGGGCTAAGTTCGTGCCAGCAGCCGCGGTAA  
ACGAACCGTCCTAACGTTGTTTCGGAATCACTGGGCTTAAAGGGCGCGTAGGCGGGCGATC  
AAGTCCGGGGTGAAATCTTTTCGGCTTAACCGGAAAACAGCCTTGATACTGATTGTCTCG  
AGGGAGGTAGGGGCTGTGGAACCTCCGGTGGAGCGGTGAAATGCGTTGATATCGGAAGG  
AACGCCGCTGGCGAAAGCGACGGGCTGGACCTTTTCTGACGCTGAGGCGCGAAAGCTAGG  
GGAGCAAACGGGATTAGAAACCCCAGTAGTCC

>Otu14428

CCAGCCTACGGGTGTCAGCAGTGGGGAATCTTGCGCAATGGGCGAAAGCCTGACGCAGCG  
ACGCCGCGTGTCGAATGAAGGTCTTCGGATCGTAAAGCACTGTGCGGGGGGAAGAAACCG  
AAAGGGTGACGGTACCCCGAGAGGAAGCACCGGCTAACTCTGTGCCAGCAGCCGCGGTAA  
TACAGAGGGTGCGAGCGTTGTTTCGGAATTATTGGGCGTAAAGCGCTGGTAGGCGGCTTGT  
TAAGTTCGCGTGTGAAAGCTTCGGGCTCAACCGGAAAAGTGCAGCGGAACTGGCGAGCTT  
GAGTGTGCGAGAGGGCCGCGGAATTCCCTGGTGTAGAGGTGAAATTTCGTAGATATCAGGAG  
GAACACCAGAGGCGAAGGCGCGGCCTGGAAGACCACTGACGCTGAGCAGCGAAAGCGTG  
GGGAGCAAACAGGATTAGAGACCCCCGTAGTCC

>Otu14436

CCAGCCTACGGGGGGCAGCAGTCAAGAACATTCGACAATGGGCGAAAGCCTGATCGAGCG  
ACACCACGTGCAGGATGAAGGCCTTCGGGTGTAAACTGCGGTAGATAGTTAACAATGCA  
AATGAGTGACTATTGGAAAGAGGTGGGTAACCTACGTGCCAGCACCAACGGTAATACGTAG  
ACCTCAAGCGTTATCCGGATTTATTGGGCGTAAAGAGCATGTAGGAGGTTTTGTGCGTCT  
TCTGTTAAAGCCCAGAGCCTAACTCTGGAAGTGCAGGAGATACGACAAGACTAGAGGGGG  
TTAGAGGTGCATGGAACCTACGGTGTAGGGGTGAAATCCGTTGATATCATGGGGAACACC  
AAATGCGAAGGCAGTACACTGGCGCATATTTGACACTGAAGCACGAAAGCGTGGGTAGCG  
AATGGGATTAGATACCCCCGTAGTCC

>Otu14441

CAGCCTACGGGATGCTGCAGTGGGGAATATTGGACAATGGGGGAAACCCCTGATCCAGCAA  
TGCCGCGTGAGTGAAGAAGGCCTTCGGGTGTAAAGCTCTTTTGTGGGGGACGATGATGA  
CGGTACCCACGAATAAGCTCCGGCTAACTTCGTGCCAGCAGCCGCGGTAAATACGAAGGG  
AGCTAGCGTTGTTTCGGAATGACTGGGCGTAAAGGGTGTGTAGGCGGTCGTGTGCGTCAGA  
TGTGAAATCCCCGGGCTTAACCTGGGAATGGCATTGATACGGCACGACTAGAGATGGAT  
AGAGGGTAGTGGAATTGCGAGTGTAGAGGTGAAATTTCGTAGATATTCGCAGGAACACCAG  
TGGCGAAGGCGGCTACCTGGGTCCATACTGACGCTGAGGCACGAAAGCGTGGGGAGCAAA  
CAGGATTAGAGACCCCCGTAGTCC

>Otu14450

CCAGCCTATGGGATGCAGCAGCGGGGAATCTTGCAATGGAGGAAACTCTGATGCAGCG  
ACGCCGCGTGAGTGATGAAGCCCTTCGGGGTGTAAAGCTCTTTTCGGCAGGAACGATAATG  
ACGGTACCTGCAGAAGAAGCTGCGGCTAACTTCGTGCCAGCAGCTGCGGTAATACGAGGG  
GAGCTAGCGTTGTTTCGGAATTACTGGGCGTAAAGGGCGCGTAGGCGGTACTATAAGTCAG

ATGTGAAAGCCCTGGGCTTAACCTAGGAGGTGCATTTGATACTGTAGAACTAGAGATCGA  
GAGAGGAAAGTGGAATTACGAGTGTAGAGGTGAAATTCGTAGATATTCGTAAGAACACCA  
GTGGCGAAGGCGACTTTTCTGGCTCGATACTGACGCTAAGGCGCGAAAGCGTGGGGAGCAA  
ACAGGATTAGAAACCCTGGTAGTCC

>Otu14451

CCAGCCTATGGGGGGCAGCAGTTAGGAATATTGCGCAATGGGGGAAACCCTGACGCAGCA  
ACGCCGCGTAGGTGATGAAGGCCTTCGGGTCGTAAAGCCCTGTCGGAGGGGAAGAAAAGC  
TCGCTGGCTAATATCCAGCGGGCCTTTGACGGTACCCTCAAAGGAAGCACCGGCTAACTC  
TGTGCCAGCAGCCGCGGTAAGACAGAGGTCCCGAGCGTTGTTTCGGATTCAATTGGGCGTAA  
AGGGTGTGTAGGAGGTGCGGTAAGTCAGGTGTGAAATCTCACAGCTTAACTGTGAAACTG  
CGCTTGATACTGCCCGGCTAGAGGATCGGAGGGGGTAACGGAATTTATGGTGTAGCAGTG  
AAATGCGTAGATATCATAAGGAACACCGGTGGCGAAGGCGGTTACCTGGAAGATTCTCTGA  
CTCTGAAACACGAAAGCCAGGGGAGCAAACGGGATTAGATACCCCTGTAGTCC

>Otu14456

CCAGCCTACGGGTCGCTGCAGTGGGGAATATTGGACAATGGGCGCAAGCCTGATCCAGCA  
ATGCCGCGTGTGTGAAGAAGGCCTGCGGGTTGTAAAGCACTTTTAGTTGGGAGGAAGGTT  
TTGCCACTAATAGTGGTGAGAATTGACGTTACCGACAGAAAAAGCACCGGCTAACTCTGT  
GCCAGCAGCCGCGGTAATACAGAGGGTGCAGCGTTAATCGGAATTACTGGGCGTAAAGG  
GTGCGTAGGTGGTTTTTTAAGTCAGATGTGAAAACCCTGGGCTTAACCTAGGAATGGCAT  
TTGATACTGGAAGACTAGAGTGCGGAAGAGGAAAGTGGAATTTCCGGTGTAGCGGTGAAA  
TGCATAGATATCGGAAGGAACATCAGTGGCGAAGGCGACTTTCTGGTCTGACACTGACAC  
TGAGGCACGAAAGCGTGGGGAGCAAACAGGATTAGAGACCCCTGGTAGTCC

>Otu14459

CCAGCCTACGGGTCGCACCAGTCGAGAATTTTTTCGCAATGGGCGAAAGCCTGACGAAGCG  
ACGCTGTGTGAGTGATGAAGGCCTTCGGGTGTAAAACCTCTCTAGTCTGGGAGAAAGGAA  
GCGCAGTGAATAATTGTGCGACTTGATATTACCAGAAGAATAAGCACCGGCTAACTACGT  
GCCAGCAGCTGCGGTAATACGTAGGGTGCAAGCATTAATCGGAGTTATTGGGCGTAAAGG  
GCGCGTAGGCGGATATGTAAGTCTGATGTGAAAAACCAAAGCTCAACTTTGGGACTGCAT  
TAGAAACTACAAATCTCAGAGGTATGGAGGAGAAAGCGGAATTCCACGAGTAGCGGTGAA  
ATGCGTAGATATGTGGAAGAACACCAGTGGCGAAAGCGGCTTTCTATCTTAAACCTGACG  
CTGAGGCGCGAGAGCATGGGGAGCAAACAGGATTAGAAACCCAGTAGTCC

>Otu14482

CCAGCCTACGGGGGGCAGCAGTCGAGAATATTTGGCAATGGGGGCAACCCTGATCCAGCG  
ACGCCGCGTGAGTGATGAAGGCCTTCGGGTCGTAAAGCTCTGTTGGGAGGGACGATGGGT  
GACCGGGAACAATACCCCGGGCATCTGACGGTACCCTCGCGAGAAAGCACCGGCCAACTCT  
GTGCCAGCAGCCGCGGTAATACAGAGGGTGCAAGCGTTGTTTCGGAATCACTGGGCGTAAA  
GCGCGTGTAGGCGGTTTTCTAAGTCAGGTGTGAAATCCCCCGGCTTAACCGGGGAAGTGC  
GCCTGAAACTGGGAGGCTTGAGTATCGGAGAGGAAAGGGGAATTCCCGGTGTAGAGGTGA  
AATTCGTAGATATCGGGAGGAACACCGGCGGCGAAGGCGCCTTTCTGGTCGATCACTGAC  
GCTGAGACGCGAAAGCGTGGGGAGCAAACAGGATTAGATACCCCGTAGTCC

>Otu14485

CCAGCCTACGGGATGCTCCAGTGGGGAATCTTGCAACAATGGGCGAAAGCCTGATGCAGCG  
ACGCCGCGCGGGGGATGAAGCATTTTCGGTGTGTAAACCCCTTTTCGACTGGGAAGAATGCC  
TCGCAAGAGGACTGACGGTACCAGTATAAGAAGCTCCGGCTAACTTCGTGCCAGCAGCCG  
CGGTAATACGAAGGGGGCTAGCGTTGTTTCGGAATTACTGGGCGTAAAGCGCGCGCAGGCG  
GCTTCTCAAGTCAGGGGTGAAAGCCCAGAGCTCAACTCTGGAAGTGCCTTTGAAACTGTG  
GAGCTTGAGTACGGGAGAGGTGAGTGGAATCCCAGTGTAGAGGTGAAATTCGTAGATAT  
TGGGAAGAACACCGGTGGCGAAGGCGGCTCACTGGCCCGTTACTGACGCTCAGGCGCGAC  
AGCGTGGGGATCAAACAGGATTAGATACCCGGGTAGTCC

>Otu14494

CCAGCCTACGGGTTGCAGCAGTCGAGAATCTTCCGCAATGGGCGAAAGCCTGACGGAGCG  
ACGCCGCGTGTTGATGAAGTCCTTAGGGACGTAAAAACCTTTTATGAGGGAGAAAGTCA  
TTGATAGTACCTCATGAATAAGGGTTGCTAAACTCGTGCCAGCAGCAGCGGTAATACGA  
GTGCCCCAAGCGTTATCCGGAATTATTGGGCGTAAAGGGTGTGTAGGTGGTCATGCTAGT  
CTCTTGTTAAAGCTCTCGGCTTAACCGGGAACATGCAAGGGAAACGGCATGACTAGAGGA  
TGTGAGAGGTAAGCGGAACCTCATGGTGTAGGGGTGAAATCCGTTGATATCATGGGGAAAC  
CCAAAAGCGAAGGCAGCTTACTGGCGCATTCCTGACACTGAGACACGAAAGCGTGGGTAG  
CGAATGGGATTAGATACCCAGTAGTCC

>Otu14503

CCAGCCTATGGGGGGCAGCAGTGGGGAATATTGGACAATGGGCGCAAGCCTGATCCAGCA  
ATGCCGCGTGGGTGAAGAAGGTCTTCGGATTGTAAAGCCCTTTTCGGCGGGGACGATGATG  
ACGGTACCCGCGAGAAGAAGCCCCGGCTAACTTCGTGCCAGCAGCCGCGGTAATACGAAGG  
GGGCTAGCGTTGCTCGGAATGACTGGGCGTAAAGGGCGTGTAGGCGGCGTTTCAAGTCGG  
ATGTGAAATCCCTGGGCTTAACCTGGGGGCTGCATTTCGAGACTGTTGTGCTGGAGTGC GG  
AAGAGGGTCGTGGAATTC CAGTGTAGAGGTGAAATTCGTAGATATTGGGAAGAACACCG  
GTGGCGAAGGCGGCGACCTGGTCCGTGACTGACGCTGAGGCGCGAAAGCGTGGGGAGCAA  
ACAGGATTAGAAACCCTCGTAGTCC

>Otu14516

CCAGCCTATGGGGGGCACCAGTCGAGAATCTTCCACAATGGACGAAAGTCTGATGGAGCG  
ACGCCGCGTGAATGATGAAGTACTTCGGTATGTAAAATTCTTTTATGGGGGACGAAGTTT  
ATTGACGGTACCCACGAATAAGGAGTTGCTAAACTCGTGCCAGCAGCAGCGGTAATACG  
AGTGCTCCAAGCGTTATCCGGAATCATTGGGCGTAAAGGGTGTGTAGGCGGTTCGTGTTAG  
TCCTTTTGTTAAATTCCTTCGGCTTAACCGGGGGCATGCAGAGGAAACGGCACGACTAGAGG  
ATGCGAGAGGTGAATGGAACCTCATGGAGTAGGGGTGAAATCCGTTGATATCATGGGGAAC  
ACCAAATGCGAAGGCAATTC ACTGGCGCACTCCTGACGCTGAAACACGAAAGCGTAGGTA  
GCGAATGGGATTAGATACCCGGGTAGTCC

>Otu14517

CCAGCCTATGGGTTGCAGCGGGGAATCTTGCGCAATGGACGAAAGTCTGACGCAGCAACG  
CCGCGTGAGGGACGAAGGCTTCTGAGTTGTAAACCTCTTTTCGACAGGAACGATTGTGAC  
GGTACCTGTAGAAGAAGCACCGGCCAACTATGTGCCAGCAGCCGCGGTGATACATAGGGT  
GCGAGCGTTATTCGGATTTATTGGGCGTAAAGAGCTCGTAGGCGGTTTGATTAGTCGGGT  
GTGAAACCTCCAGGCTCAACCTGGAGCCGCCACTCGATACTGTCATGACTAGAATTCGGT  
AGGGGACCACGGAATTCCTGGTGTAGCGGTGAAATGCGCAGATATCAGGAGGAACACCAG  
CAGCGAAGGCGGTGGTCTGGGCCGACATTGACGCTGAGGAGCGAAAGCGTGGGGAGCGAA  
CAGGATTAGATACCCGTGTAGTCC

>Otu14522

CCAGCCTACGGGTGGCAGCAGTGGGGAATTTTGGACAATGGGGGAAACCCTGATCCAGCA  
ACGCTGCGTGAGGGATGAAGGTCTTCGGATCGTAAACCTCTTTTCTGGGGGACGAAATCC  
CGCAAGGGTCTGACGGTACTCCAGGAATAAGCCACGGCTAAATATGTGCCAGCAGCCGCG  
GTAAGACATATGTGGCGAGCGTTACTCGGAATCACTAGGCGTAAAGCGCGTGTAGGCGGG  
TGCTTAAGTCCGCTGTGAAATCTCCCGGCTCAACTGGGAGGGGTGAGCGGATACTGAGCG  
CCTTGAGTGAGGTGGGGGGCAGCGGAATTC CCGGTGTAGTGGTGAAATGCGTAGATATCG  
GGAGGAACACCAATGGCGAAAGCAGCTGCCTGGGCCTCTACTGACGCTAAGACGCGAAAG  
CTAGGGGAGCAAACAGGATTAGATACCCCGGTAGTCC

>Otu14528

CCAGCCTATGGGGCGCAGCAGTAGGGAATCTTCCGCAATGGACGAAAGTCTGACGGAGCA  
ACGCCGCGTGAGTGATGAAGGTTTTTCGGATCGTAAAGCTCTGTTGTTAGGGAAGAATAAG  
TGCGGGAGTCACTGCCCGCGCCTTGACGGTACCTAACCAGAAAGCCACGGCTAACTACGT  
GCCAGCAGCCGCGGTAATACGTAGGTGGCAAGCGTTGTCCGGAATTATTGGGCGTAAAGC  
GCGCGCAGGCGGTCTTTTAAAGTCTGATGTGAAAGCCCCCGGCTCAACCGGGGAGGGTCAT  
TGGAAACTGGAGGACTTGAGTACAGAAGAGGAGAGTGGAATTCACGTGTAGCGGTGAAA  
TGCGTAGAGATGTGGAGGAACACCAGTGGCGAAGGCGACTCTCTGGTCTGTA ACTGACGC  
TGAGGCGCGAAAGCGTGGGGAGCGAACAGGATTAGAAACCCGCGTAGTCC

>Otu14538

CCAGCCTATGGGGGGCTGCAGTGAGGAATATTGCGCAATGGGGGAAACCCTGACGCAGCA  
ACGCCGCGTGAGTGAGGAAGGTTTTTCGGATTGTAAAGCTCTGTGCGAGCGGAAAGAAATGC  
ATTATGGCTAATATCCATGGTGCCTGACGGTACCGCTAAAGGAAGCACCGGCTAACTCCG  
TGCCAGCAGCCGCGGTAATACGGGGGGTGTAAAGCGTTGTTCGGAATCATTGGGCGTAAAG  
CGCGTGTAGGCGGCTTGACAAGTCAGATGTGAAATCCCTGGGCTTAACCCAGGAAGTGCA  
TTTGAAACTGTCAGGCTAGAGTAAGGGAGAGGAAAGTGGAATTCCTGGTGTAGAGGTGAA  
ATTCGTAGATATCAGGAGGAACACCGGTGGCGAAGGCGGCTACCTGGACCGATATTGACG  
CTGAGACGCGAAAGCGTGGGGAGCAAACAGGATTAGAAACCCTGGTAGTCC

>Otu14546

CGCCTACGGGTTGCAGCAGTGGGGAATTTTGGACAATGGGCGCAAGCCTGATCCAGCAAT  
GCCGCGTGAGTGAGAAGGCCCTTCGGGTTGTAAAGCTCTTTTGTGAGGGAAGAAACGGTG  
AGGGCTAATATCTCTTGCTAATGACGGTACCTGAAGAATAAGCACCGGCTAACTACGTGC

CAGCAGCCGCGGTAATACGTAGGGTGCAGCGTTGTTTCGGATTTATTGGGCGTAAAGCGC  
GTGTAGGCGGTTTTTTAAGTCTGATGTGAAAGCCCTGGGCTCAACCCGGGAAGTGCAATTG  
GAAACTGGGAGACTTGAATACGGGAGAGGGCAGTGGAATTCCTGGTGTAGGAGTGAAATC  
CGTAGATATCAGGAGGAACACCGGTGGCGAAGGCGGCTGCCTGGACCGATATTGACGCTG  
AGACGCGAAAGCGTGGGGAGCAAACAGGATTAGAAACCCCGGTAGTCC

>Otu14550

CCAGCCTATGGGTTGCAGCAGTCGCGAATCTTTTGCAATACACGAAAGTGTGACAAAGCG  
AACCAGAGTGTTCCTCGCACAGGAAAACCTTTGCCAGCTGTAAAAAGGCTGGCGAATAAG  
GACTGGGCAAGACTGGTGCCAGCCGCCGCGGTAATCCCAGCAGTCCAAGTTGCAGCCAAC  
TTTATTAGGTCTAAAACATCCGTAGCTTGTTTGACAAGTCTTTGTGAAATCTGGCATCT  
TAAGTGTGGGCGCGCAAAGAATACTGTTGAGCTAGGGACCGGTAGATGTAAAGAGTATG  
CTTAAGGTAGTGGTAAAATACGTTAATCTTAGGCAGACTAACAATCGAGCGAAGGCACTT  
TACAAGGACGGATCCGACAGTGAGGGATGAAGGCTAGGGGCGCAAACCGGATTATAAACC  
CCCGTAGTCC

>Otu14554

CAAGCCTACGGGAGGCAGCAGTGAGGAATCTTGACAATGGGGGAAACCCTGATCCAGCG  
ACGCCGCGTGAAGGATGAAGTCTTCGGATTGTAAACTTCTTTTCTTTGGGAATAAGAAG  
CCTGTAGAAATACGGGAAGTGAATGTACCAGAGGAATAAGCCACGGCTAACTTCGTGCCA  
GCAGCCGCGGTAATACGAAGGTGGCAAGCGTTACTCGGAATTACTAGGCGTAAAGGGCAG  
GTAGGCGGTTTGATAAGTCTGTTGTGTGAGCTCCCGGCTTAACTGGGAGAGGTCAACGGA  
AACTATTAGACTTGAGTGTGGGAGAGGGTACTGGAATTCCTGGTGTAGCGGTGAAATGCG  
CAGAGATCAGGAGGAACACCTATGGCGAAAGCAAGTACCTGGACCAATACTGACGCTCAG  
CTGCGAAAGCTAGGGGAGCAAACAGGATTAGATAACCCCGGTAGTCC

>Otu14555

CCAGCCTATGGGACGCTCCAGTAGGGAATATTGCGCAATGGACGCAAGTCTGACGCAGCA  
ACGCCGCGTGGATGATGAAGGTTTTTCGGATCGTAAAATCCTGTGCGCGGGGAAGAAACGT  
ACCGGTAGTAACTGACCGGTGCCTGACGGTACCCGCAGAGGAAGTCCCGGCTAACTCCGT  
GCCAGCAGCCGCGGTAATACGGGGGGGACAAGTGTTGTTTCGGATTTACTGGGCGTAAAGG  
GCGCGTAGGCGGACCTTCAAGTCAGATGTGAAAACCTCCGGGCTCAACCCGGAGCCTGCAT  
TTGATACTGGTGGTCTTGAGTACAGGAGAGGAGAGTGGAATTCAGGTGTAGCGGTGAAA  
TGCGTAGATATCTGGAAGAACACCAGTAGCGAAGGCGGCTCTCTGGACTGATACTGACGC  
TCAAGCGCGAAGGCTTGGGGAGCAAACAGGATTAGATAACCCCGGTAGTCC

>Otu14561

CCAGCCTATGGGTGGCTCCAGTGAGGAATATTGCGCAATGGCCGAAAGGCTGACGCAGCG  
ACGCCGCGTGAAGGATGAAGTCCGTTAGGACGTAAACTTCTTTTGCAGGGGATGAATGTG  
CCCCTCAGGGGTATTGACCGTACCCTGCGAATAAGGATCGGCTAACTACGTGCCAGCAGC  
CGCGGTAATACGTAGGATCCGAGCGTTGTCCGGAATTACTGGGTGTAAAGGGCGTGTAGG  
TGGGTCTCTAAGTCGGTGGTGAGATCCTGCAGCTTAACTGCAGAACTGCCATTGATACTG  
GAGGTCTTGAGTGCGGCAGAGGGAGATGGAATTCATGGTGTAGCGGTGAAATGTGTAGAT  
ATCATGAAGAACACCGGTAGCGAAGGCGGCTCTCCTGGTCCGTAACTGACACTGAGGCGCG  
AAAGCGTGGGGAGCAAACAGGATTAGATAACCCTAGTAGTCC

>Otu14568

CCAGCCTATGGGGGGCACCAGCTGAGGAAATCTTCAATGCCCGAAAGGGTGAAAGAGTA  
AACCAGAGTGTTCCTTCAAGAAAACCTTTTATCTGCTGCAAAAAGGCAGATGAATAAGGA  
CTGGGCAAGACCGGTGCCAGCCGCCGCGGTAATCCCGGCGGTCCAAGTCGCATCCACATC  
TATTGGGTCTAAAACATCCGTAGCTTGTTTCGTAAGTCTCTTGTGAAATCTGATAACTCA  
ATTATCAGGCGTGCAAGAGATACTGCAAAGCTCTGAGACCGGAAGACGCAAAGAGTACGA  
TCGAGGTAGTGGTAAAATATTTAATCTTAATCGGACTAACAATGGCGAAGGCACTTTGC  
GAGTACGGATCTGACAGTGAGGGATGAAGGCTAGGGGCGCAAAGGGATTAGAGACCCGA  
GTAGTCC

>Otu14575

CCAGCCTACGGGGGGCTCCAGTTTCGAATTATTCCCAATGGACGCAAGTCTGAGGGTGCA  
ATACCGCGTGGAGGATGAAGGCCCTAGGGTCGTAAACTCCTGTGCTCAGGGACAAAACCT  
ATTATTTTAATAGAATAGTAGCTGATTTAACTTGAAGAGGAAGAGGTGGCTAACTCTGTG  
CCAGCAGCCGCGGTGATACAGAGACCTCAAGCGTTACTCGGATTCACTGGGCGTAAAGGG  
TACGTAGGTGGCATCGTGTGTTGGGCGTGAAATTCTGGGGCTTAACCCCGGCGCTGCGTC  
CAAACCTACGTTGCTAGAGTACTGTAGAGATGAGCGGAATTCAGGTGTAGCGGTAAAAAT  
CGGTAGATATCTGAAAGAACACCAACGGCGAAGGCAGCTCATTGGGCAGTAACTGACACT

GAGGTACGAAAAGCGTGGGGAGCAAAAAGGATTAGAAACCCTCGTAGTCC

>Otu14588

CAGCCTACGGGACGCTGCAGTCGAGAATTTTTTCACAATGGGCGCAAGCCTGATGGAGCGA  
CGCCGCGTGGGGGATGAATGGCTTCGGCCCGTAAACCCCTGTCATTTGTGAACAAACCTT  
TTCACTGAACAAGTGGAAAGTTGATAGTAACGGAAGAGGAAGGGACGGCTAACTCTGTGC  
CAGCAGCCGCGGTAATACAGAGGTCCCAAGCGTTGTTTCGGATTCACTGGGCGTAAAGGGT  
GCGTAGGTGGCCGGGTAAGTCTGATGTGAAATCTCGGAGCTCAACTCCGGAACGGCATTG  
GATACTATCCGGCTGGAGGGTCGGAAGGGGGACTGGAATTCTCGGTGTAGCAGTGAAATG  
CGTAGATATCAAGTGGAAACACCAGTGGCGAAGGCGAGTCCCTGGACAACTCCTGACACTG  
AGGCACGAAAGCTAGGGGAGCAAACAGGATTAGAGACCCAGTAGTCC

>Otu14590

CCAGCCTATGGGTCGCAGCAGTCGAGAATTTTTTCACAATGGGCGCAAGCCTGATGGAGCG  
ATGCCGCGTGGGGGATGAATGGCTTCGGCCCGTAAACCCCTGTCATTTGCGATCAACCGT  
TGTTGTTTTAAGAGATGACAACCTGATTGTAGCGGAAGAGGAAGGGACGGCTAACTCTGTG  
CCAGCAGCCGCGGTAATACAGAGGTCCCAAGCGTTGTTTCGGATTCACTGGGCGTAAAGGG  
TGCGTAGGCGGTTGGGTAAGTCTGACGTGAAATCTCCGGGCCTAACCCGGAACCTGCGTT  
GGATACTATCCGGCTAGAGGAATGGAGGGGAGACTGGAATACTTGGTGTAGCAGTGAAAT  
GCGTAGATATCAAGTGGAAACACCAGTGGCGAAGGCGAGTCTCTGGACATTTCTTGACGCT  
GAGGCACGAAAGCCAGGGGAGCAAACGGGATTAGATACCCAGTAGTCC

>Otu14610

CCAGCCTATGGGAGGCACCAGCTAAGAATATTCCGCAATGGACGAAAGTCTGACGGAGCG  
ACGCCGGGTGGGGGATGAAGTCCTTCGGGATGTAACTCTAATAGTATGCGCGGAAGCGA  
GCCGGCCTAATACGCCGGCGAGTTGACCAGCGTACGAAAGGGGCGGCTAACTCCGTGCCA  
GCAGCCGCGGTAAGACGGAGGCCCGAGCGTTGTTTCGGAATCACTGGGCTTAAAGCGCGT  
GTAGGCGGGGTGGCAAGTACCGTGTGAAATCCCCGGCTTCAACCCGGGAACCTGCTTGGTA  
TACTGCCACTCTTGAGGCAGGTAGGGGTCGCTGGAACGTTAGGTGGAGCGGTGAAATGCG  
TAGATATCTAACGGAACGCCTGTGGCGAAAGCGGGCGACTGGGCCTGACCTGACGCTGAG  
ACGCGAAAGCGTAGGGAGCAAACGGGATTAGAGACCCTCGTAGTCC

>Otu14619

CCAGCCTATGGGGGGCTGCAGCTAAGAATATTCCGCAATGGGCGAAAGCCTGACGGAGCG  
ACGCCGCGTGGACGATGAAGGCTTTCGGGTGTAAAGTCCTTTTTTATGGGGAAGAATAAG  
TCGCCGTTGGAAGCGGCGATGATGACTGTACTCATAGAATAAGCTCCGGCTAATTACGTG  
CCAGCAGCCGCGGTAATACGTAGGGAGCGAACGTTGTTTCGGAATTACTGGGCGTAAAGCG  
CGCGTAAGCGGGCGAAAAAGTTATGGGTGAAAATCTCAGGCTTAACTTGAGACCCGCCCA  
TAAAACTGTTTGCCTCGAGTTACATAGAGGTGATAAGAATTCCTGGTGTAGGGGTGAAAT  
CTGTAGATATCAGGAAGAATACCAATGGCGAAGGCAAGTCACTGGGTGTATACTGACGCT  
GAGGTGCGAAAGCCAGGGGAGCAAACGGGATTAGATACCCCGTAGTCC

>Otu14621

CCAGCCTCGGGAGGCACCAGTCGAGAATCTTCCGCAATGGGCGAAAGCCTGACGGAGCGA  
CGTTACGTGAATGAAGAAGCCCTTCGGGGTGTAAAGTTCTTTTATGTAGGAAGAAGTTAT  
TGACTGTACTACATGAATAAGGAGATCCTAATTCTGTGCCAGCAGGAGCGGTAAGACAGA  
ATCTCCAAGCGTTACCCGGATTTATTGGGCGTAAAGGGTCCGTAGGTGGTTTAGTAAGTT  
GAAAATCAAAGCTCATCGGCTTAACTTTGAGACTTTTTTCAAACTGCTAGACTTGAGGG  
CGTTGGGGGTTAGCGGAACCGACGGAGTAGGGGTGAAATCCGTTGATATCGTCGGGAACA  
CCAAAAGCGAAGGCAGCTAACTATGACGACCCTGACACTGAGGGACGAAAGCGTGGGGAG  
CAAAAAGGATTAGATACCCGAGTAGTCC

>Otu14630

CCAGCCTATGGGTTGCAGCAGTTAGGAATTTTTCGCAATGGACGAAAGTCTGACGCAGCG  
ATACCGCGTGAAGGATGAAGTCTCTCGGGATGTAACTTCTTTTAGAGAATCATGAAGAT  
TCTCAGAATAAGCAGCTACAACTATGTGCCAGCAGTCGCGGTAATACATAGGCTGCAAG  
CGTTATCCGGATTTATTGGGCGTAAAGAGTCTGTAGGCGGTTGCCTAAGTCTTGTTTCAA  
AGACCTCGACTTAATCGGGGGAAGGGGCAAGATACTGGGTACTAGAGTGATATCGGGGT  
TACTGGAATTTGTAGTGTAGGGGTAAATCCGTGGATACTACAAAGAACCAAGCGCGA  
AGGCGGGTAACCTAGATATATACTGACGCTGAGAGACGAAAGCTAGGGAAGCAAATCAGAT  
TAGATACCCGCGTAGTCC

>Otu14632

CCAGCCTATGGGTTGCACCAGCTAAGAATATTCCGCAATGGGCGCAAGCCTGAACCAGCC  
ATCCCGCGTGCAGGAAGAAGGCGCTATGCGTCGTAACTGCTTTTCCAGGGGAAGAAAAC

CCGTTACGAGTAACGGCTTGCCGGTACCCTGGGAATAAGCATCGGCTAACTTCGTGCCAG  
CAGCCGCGGTAATACGAAGGATGCAAGCGTTATCCGGATTTATTGGGTTTAAAGGGTGCG  
TAGGCGGACTTATAAGTCAGTGGTGAAATCTCGATGCTTAACATCGAACGTGCCATTGAT  
ACTGTAGGTCTTGAGTACAGATGCCGTTGGCGGAATGTGTTCATGTAGCGGTGAAATGCAT  
AGATATGACACAGAACACCGATTGCGAAGGCAGCTGACGAACTGTAAGTACGCTGAGG  
CACGAAAGCGTGGGGATCAAACAGGATTAGAAACCCTAGTAGTCC

>Otu14638

CCAGCCTACGGGGGGCACCAGGCGGAAAAATTCGCAATGCGCGAAAGCGTGACGGGGGA  
ATTCTGAGTATTCCTCTTACGAGGAACTTTTGCCAAGATTGAATCTCTTGGAGAATAAGG  
GGTGGGTAAATCCTGTGCCAGCCGCCGCGGTAATACAGGTAGCCCGAGTGGTATCCACGA  
ATATTGAGCCTAAAGCGCTCGTAGCCGGTTTTGCAAGTCTTCTGTGAAATCCTCTGGCTC  
AACCAGAGGGCGTGCAGGAGATACTACAAGGCTTGGGAGTGGGGGAGGTAATGGGTACGT  
TAGGGGGAGGGGTAAAATCCTGTAATCCTTAACGGACCTTCAGTAGCGAACTTTTTCTT  
TTTGCAAAAAGAAAAAATTTACTAAAAGAAAAAGCGTTAGAGCGCATTACCAAAACACGT  
CCGACGGTGAGGGGCGAAGGCTAGGGGAGCAAATCGGATTAGAAACCCCTCGTAGTCC

>Otu14683

CCAGCCTACGGGGGGCTGCAGTCGAGGATCTTCGGCAATGGGCGCAAGCCTGACCGAGCG  
ACGCTGCGTGTGGGATGAAGGCCTTCGGGTTGTAAACCACTGTCAGAGGGGATGAAATGC  
GCATGGGTTCTCCCATGCGTTTGACATAGCCTCAGAGGAAGCAAGGGCTAAGTTCGTGCC  
AGCAGCCGCGGTAAGACGAACCTTGCTAACGTTATTTCGGAATCACTGGGCTTAAAGGGTG  
CGTAGGCTGCGCAGAAAGTTGGGTGTGAAATCCCTCGGCTTAACCGAGGAACTGCGCCCA  
AACTACTGTGCTCGAGGGAGACAGAGGTGAGCGGAACCTTAGGGTGGAGCGGTGAAATGC  
GTTGATATCCTAAGGAACACCCGTGGCGAAAGCGGCTCACTGGGTCTCTTCTGACGCTGA  
GGCACGAAAGCTAGGGTAGCGAACGGGATTAGATACCCTAGTAGTCC

>Otu14717

CCAGCCTACGGGTCGCTGCAGTGGGGAATTTTGGACAATGGGCGCAAGCCTGATCCAGCC  
ATGCCGCGTGAGTGAAGAAGGCCTTCGGGTTGTAAAGCTCTTTCGGCGGGGAACGAAACGG  
TTCGTGTTAATAACCCGGACTAATGACGGTACCCGAAGAAGAAGCACCGGCTAACTACGT  
GCCAGCAGCCGCGGTAATACGTAGGGTGCGAGCGTTAATCGGAATTACTGGGCGTAAAGC  
GTGCGCAGGCGGTTTTCTAAGTCAGATGTGAAAGCCCCGGGCTCAACCTGGGAACTGCGT  
TTGAAACTGGGAGACTAGAGTATGTGAGAGGGGGTGGAATTCACAGTGTAGCAGTGAAA  
TGCGTAGAGATGTGGAGGAACACCGATGGCGAAGGCAGCCCCCTGGGATAATACTGACGC  
TCATGCACGAAAGCGTGGGGAGCAAACAGGATTAGATACCCAGTAGTCC

>Otu14720

CCAGCCTACGGGGGGCAGCAGTGAGGAATATTGCGCAATGGGGGCAACCCTGATCCAGCC  
ATGCCGCGTGAGTGAAGAAGGCCTTCGGGTTGTAAAGCTCTTTCGGCGGGGAAGAAATTG  
CTTGGGCTAATACCCTGAGTAGATGACGGTACCCGAAGAAGAAGCACCGGCTAACTACGT  
GCCAGCAGCCGCGGTAATACGTAGGGTGCGAGCGTTAATCGGAATTACTGGGCGTAAAGC  
GTGCGCAGGCGGTTTTGTAAAGTCAGATGTGAAATCCCCGGGCTCAACCTGGGAAACGGCAT  
TTGAGACTGCAAGGCTGGAGTTTGGCAGAGGGGGTGGAATTCACAGTGTAGCAGTGAAA  
TGCGTGGATATGTGGAGGAACACCGATGGCGAAGGCAGCCCCCTGGGCCAATACTGACGC  
TCATGCACGAAAGCGTGGGGAGCAAACAGGATTAGGGACCCAGTAGTCC

>Otu14723

CCAGCCTATGGGACGCTGCAGGCGCGAAAACTTTCCAATAGCTTAACGGCTGAGAGGGGA  
AGCCTGAGTGGATACGTTTTTACGTATTCTTTTGCTTTGTCCAACAACAAGGCGAATAAG  
TGGTGGGTAAGACGGGTGGCAGCCGCCGCGGTAATACCCGCGCCACGAATGGTGACCGCG  
ATTATTGGGTCTAAAGCGTCCGTAGCCGGTTTAAACAAGTTCTTGGTTAAATCCAGCAGCT  
AACTGTTGGGCTCGCTGAGAATACTGTTAACTTGAGATTGGGAGAGGGCAAGGGTATTC  
CACGTGTAGGGGTAAATCCTTTAATCCGTGGAAGACCACCGGTGGCGAAGGCGCTTGCC  
TAGAACAAGTCTGACGGTGAGGGACGAAAGCTAGGGGAGCAAATCTAATCTTTCGAAAAA  
AAGATGAGAGCTTAAACGGGATTAGAAACCCCTGTAGTCC

>Otu14741

CCAGCCTATGGGTTGCAGCAGTAAGGGATATTGCGCAATGGGTGAAACCCTGATCCAGCA  
ATGCCGCGTGTGTGAAGAAGGCCTTCGGGTTGTAAAGCACTTTCGATTGGGAAGAAAAGC  
TTGGCGCTAATCAGCCAAGTCTTGACGTTACCAAGTGAAGAAGCACCGGCTAACTCTGTG  
CCAGCAGCCGCGGTAATACAGAGGGTGCAAGCGTTAATCGGAGTTACTGGGCGTAAAGGG  
CGCGTAGGCGGTTGATAAGTCGGGTGTGAAAGCCCCGGGCTTAACCTGGGAATTGCATT  
CGATACTGTGAGCTAGAGTATGGTAGAGGAAAGCGGAATTCACATGTAGCGGTGAAAT



GCGTAGATATGTGGAGGAACATCAGTGGCGAAGGCGGCTTTCTGGACTAATACTGACGCT  
GAGGCGCGAAAGCGTGGGGAGCAAACAGGATTAGATACCCGAGTAGTCC

>Otu14750

CCAGCCTACGGGTCGCAGCAGTGAGGAATATTGGTCAATGGGCGGAAGCCTGAACCAGCC  
ATCCCGCGTGCAGGAAGACGGCGCTATGCGTTGTAACTGCTTTTCCAGGGGAAGAAAAC  
CCACGACGAGTCGTGGCTTGCCGTGTACCCTGGGAATAAGCATCGGCTAACTCCGTGCCAG  
CAGCCGCGGTAATACGGAGGATGCAAGCGTTATCCGGATTCATTGGGTTTAAAGGGTGCG  
TAGGCGGACTGATAAGTCAGTGGTGAAATCTCTTTGCTTAACAAAGAACTGCCATTGAT  
ACTGTCCGTCTAGAGTATAGATGACGTTGGCGGAATATGACATGTAGTGGTGAAATACTT  
AGATATGTCATAGAACACCGATTGCGAAGGCAGCTAACGAACTATAACTGACGCTGAGG  
CACGAAAGTGCGGGGATCAAACAGGATTAGAAACCCCGAGTAGTCC

>Otu14756

CCAGCCTACGGGGCGCTGCAGTTTCGAATCATTCTCAATGGGGGAAACCCCGAAGGAGCG  
ACGCCGCGTGGGGGATGAAGGTCTTCGGATTGTAAACCCCTGTCATGCGGGATCAAAGCA  
CACGACCCAACACGTCGTGTGTGATAGTACTGCAAGAGGAAGCAGTGGCTAACTCTGTG  
CCAGCAGCCGCGGTAATACAGAGACTGCAAGCGTTGTTTCGGATTCATTGGGCGTAAAGGG  
TCCGCAGGTGGTCCGGTAAGTCAGATGTGAAATCCCATGGCCTAACCATGGAAAGTCGTT  
TGAAACTGCCGGGCTAGAGGACTGGAGAGGAGGCTGGAATAGTCGGTGTAGCGGTGAAAT  
GCGTAGAGATCGACTAGAACACCAGTAGCGAAGGCGAGCCTCTGGACAGCTCCTGACACT  
CAGGGACGAAAGCTAGGGGAGCAAACGGGATTAGAAACCCCTCGTAGTCC

>Otu14775

CCAGCCTATGGGAGGCACCAGTAGGGAATATTGCGCAATGGGGGAAACCCCTGATGCAGCG  
ACGCCGCGTGAGTGATGAAGGTCTTCGGATTGTAAAGCTCTGTTGAGTGGGAAGAACAGT  
CCCGGGAATAATACCTCGGGATTTGACGGTACCCTTGAGGAAGCCCCGGCTAACTACGT  
GCCAGCAGCCGCGGTAATACGTAGGGGGCAAGCGTTGTTTCGGAATCACTGGGCGTAAAGG  
GAGCGTAGGCGGGGAAATAAGTTAGAAGTTTAATGTACGGGCTTAACCCGTAATCTGCTT  
CTAATACTGTTTTTCTTGAGTATGGGAGAGGGAGATGGAATTCAGGTGTAGCGGTGGAA  
TGCGTAGATATCTGGAAGAACACCAGCTGCGAAGGCGGTCTCCTGGCCCAATACTGACGC  
TGAGGCTCGAAAGCTAGGGGAGCAAACAGGATTAGAAACCCCGTAGTCC

>Otu14781

CCAGCCTATGGGTGGCAGCAGTGAGGAATATTGGTCAATGGGCGCAAGCCTGAACCAGCC  
ATCCCGCGTGCAGGAAGACGGCGCTATGCGTTGTAACTGCTTTTCCAGGGGAAGAAAAC  
CTACGACGTGTCGTGGCTTGCCGGTACCCTGGGAATAAGCATCGGCTAACTCCGTGCCAG  
CAGCCGCGGTAATACAGAGGATGCAAGTTTTATCCGGATTTATTGGGCGTAAAGCGTCTG  
CAGGTTGATTCTTAAGTCTTTTGTTAAAACTTTAAGCTTAACCTAAAACTGCAAAAGAA  
ACTACTTATCTAGAGTTTATTAGAGGTAAAGGAAATTTTTGGTGGAGCGGTGAAATGCGT  
AGATATCAAAGGAGCACCAATAGCGAAAGCACTTTACTGGGTTTAACTGACACTCAGA  
GACGAAAGCTAAGGGAGCAAACAGGATTAGATACCCTAGTAGTCC

>Otu14783

CCAGCCTATGGGGCGCTGCAGTCGAGAATCTTCCGCAATGGGCGAAAGCCTGACGGAGCG  
ACGCCGCGTGCAGGATGAAGTTCTTCGGGACGTAAACTGCTTTTATAGGGGAGAAAGTTT  
ATTGATAGTACCCTATGAATAAGAGGTTGCTAAACTCGTGCCAGCAGCAGCGGTAATACG  
AGTGCCCTCAAGCGTTATCCGGAATCATTGGGCGTAAAGGGTGTGTAGGCGGATATGTTAG  
TCTCTTGTAATAATCTTCGGCTTAACCGGGGAGCGCGGGAGAAACGGCATATCTTGAGG  
ATGCGAGAGGTGAATGGAACCTCTAGGTGTAGGGGTGAAATCCGTTGATATCTAGGGGAAC  
ACCAAAGCGAAGGCAATTCACCTGGCGCACTCCTGACGCTGAGACACGAAAGCGTGGGT  
GCGAATGGGATTAGAGACCCCGTAGTCC

>Otu14784

CCAGCCTACGGGTTGCTGCAGTCGAGAATCTTCCACAATGGACGAAAGTCTGATGGAGCG  
ACGCCGCGTGATTGATGAAGTCCCTTTGGGACGTAAAGATCTTTTATGAGGGAAGAAGTT  
TATTGACTGTACCTCATGAATAAGAGGCTCCTAATCTCGTGCCAGCAGGAGCGGTAATAC  
GAGAGCCTCGAGCGTTATCCGGAATTATTGGGCGTAAAGGGTGTGTAGGTTGTTCTGTTA  
GTCTTTTGTCAAATTCCTGAGCTTAACCTGGGACCCGCAAAAGAAACGGCAGAACTAGAA  
AGTGCGAAAGGCGTACGGAACCTATGGTGTAGGGGTGAAATCCGTTGATATCATAGGGAA  
CACCGAAAGCGAAAGCGGTACGCTGGCGCATATTTGACACTGAAACACGAAAGCGTGGGT  
AGCGAATGGGATTAGAAACCCGAGTAGTCC

>Otu14787

CCAGCCTATGGGTGGCAGCAGTGGGGAATCTTGCAACAATGGGGGAAACCCCTGATGCAGCG

ACGCCGCGTGAATGAAGAAGGCCTTAGGGTTGTAAAGTTCTTTTGTCTGGGAGCAAGGTT  
AGTGGGTAAAGAGCTAATTAAGTTGAGAGTACCAGAAGAATAAGCACCGGCTAACTACGT  
GCCAGCAGCCGCGTAATACGTAGGGTGCAGCGTTAATCGGAATTACTGGGCGTAAAGG  
GTGCGCAGGCGGATATATAAGTTAGATGTGAAATCCCCGAGCTTAAGTTGGGAAGTGCAT  
TTAAGACTGTATGTCTAGAGTTTGTGAGAGGGGGGTAGAATTCCAAGTGTAGCAGTGAAA  
TGCGTAGAGATTTGGAGGAATACCAGTGGCGAAGGCGGCCCCCTGGGATAGAAGTACGCG  
TCAGGCACGAAAGCGTGGGAGCGAACAGGATTAGAGACCCCGGTAGTCC

>Otu14789

CCAGCCTACGGGGGGCTCCAGTGGGGAATATTGCGCAATGGGCGAAAGCCTGACGCAGCG  
ACGCCGCGTGGGGGATGAAGCTTTTCGGAGTGTAACCCCTTTTCGATCCGGACGAATGTC  
CCGCAAGGGATTGACGGTACGGGTATAAGAAGCCCCGGCTAACTACGTGCCAGCAGCCGC  
GGTAATACGTAGGGGGCCAGCGTTGCTCGGAATTACTGGGCGTAAAGGGTTTCGTAGGCGG  
TGTGGCAAGTCGGAAGTGAAACCTCCAGGCTTAAGTTGGAGACTGCTCCCGAAAGTGCCTA  
TGCTAGAGTGCAGGAGAGGCCAGTGAATTGCAGGTGTAGCGGTGAAATGCGTAGATATC  
TGCAGGAACACCCGTGGCGAAGGCGGCTGGCTGGACCGCAACTGACGCTGAGGAACGAAA  
GCTAGGGGAGCAAACAGGATTAGAGACCCCTAGTAGTCC

>Otu14799

CCAGCCTACGGGAGGCAGCAGTCGAGAATCTTCCACAATGGACGAAAGTCTGATGGAGCG  
ACGCCGCGTGATGGATGAAGTTCCTCGGAACGTAAACATCTTTTATAGGTTAGAAAGTTT  
ATTGATCGATCTATGAATAAGAGGTTGCTAACTCGTGCCAGCAGCAGCGGTAATACGAG  
TGCTCAAGCGTTATCCGGAATTATTGGGCGTAAAGGGTGCGTAGGCGGTTATGTTAGTC  
CTTTGTTAAAACCTCGAGCTTAAGTTCGAGACAGGCAAAGGAAACGGCATAACTAGAGGAT  
GTAAGAGGTATGTGGAACCTCATAGTGTAGGGGTGAAATCCGTTGATATTATGGGGAACAC  
CAAAGCGAAGGCAGCATACTGGTACACTCCTGACGCTGAAGCACGAAAGCGTGGGTAGC  
GAATGGGATTAGAAACCCCAAGTAGTCC

>Otu14814

CCAGCCTACGGGTCGCAGCAGTCGAGAATCTTCCGCAATGGGCGAAAGCCTGACGGAGCG  
ACGTTACGTGAATGAAGACGCCCTTAGGGGTGTAAAGTTCTTTTATGTAGGAGGAATCCG  
CAAGGATGACAGTACTACATGAATAAGGGGATCCTAATTCTGTGCCAGCAGGAGCGGTAA  
GACAGAATCCCCAAGCGTTACCCGATTTTATTGGGCGTAAAGGGTCCGTAGGTGGTAAGG  
TAAGTTAAAAGTTAAAATTCATCGGCTTAACCTTTGAAGTGCTTTTAATACTGCCTTACT  
TGAAGGCGTTAGGGGTAAACGGAACCGACGGAGTAGGGGTGAAATCCGTTGATATCGTCG  
GGAACACCAAAAGCGAAAGCAGTTAACTAAGACGACCTTGACACTGAGGGACGAAAGCGT  
GGGAGCAAAAAGGATTAGATACCCCTGTAGTCC

>Otu14820

CCAGCCTATGGGAGGCAGCAGTCGAGAGGCTTTGTCAATGGGGGAAACCCTGAACAAGCG  
ACGCCGCGTGAGGGATGAAGGCCTTTGGGTGTAAACCTCTGTTGCTCGGGAAGAAACGC  
CGGTGGGTGAACAATCCGCCGTTTGACGGTACCGGGCGAGGAAGCTCCGGCTAACTCCG  
TGCCAGCAGCCGCGGTAATACGGGGGAGCAAGCGTTGTTCCGAATCACTGGGCGTAAAG  
GGCGCGTAGGCGGTGAGGTAAGTGAGATGTGAAATCCTCCGGCTCACCCGGAGACATGCA  
TCTCATACTGCTTCGCTAGAGTGCAGCAGAGGAAACGGGAATTCCTGGTGTAGCGGTGAA  
ATGCGTAGATATCAGGAGGAACACCGGTGGCGAAGGCGCGTTTCTGGGCTGCTACTGACG  
CTGATGCGCGAAAGCTGGGGGAGCGAACGGGATTAGATACCCCAAGTAGTCC

>Otu14822

CCAGCCTACGGGAGGCAGCAGTGGGGAATATTGGACAATGGGGGAAACCCTGATCCAGCA  
ATGCCGCGTGAATGAAGAAGGCCTTAGGGTTGTAAAGTTCTTTTGTCCGTGACGATAATG  
ACGGTAGCGGACGAATAAGCCCTGGCTAACTCTGTGCCAGCAGCCGCGGTAATACAGAGA  
GGCAAGCGTTGTCCGGAATGACTGGGCGTAAAGCGCGCGCAGGCGGTCTTTTAAGTTGG  
ATGTGAAATCCCCGGGCTTAACCTGGGAAGTGCATTGATACTGGAAGACTAGAGGCCGA  
GAGAGGAAAGCGGAATGACGAGTGTAGAGGTGAAATTCGTAGATATTTCGTCCGAACACCA  
GAGGCGAAGGCGGCTTTCTGGCTCGGACCTGACGCTCAGGCGCGAAAGCGTGGGGAGCAA  
ACAGGATTAGATACCCCGTAGTCC

>Otu14833

CCAGCCTATGGGAGGCAGCAGTCGAGAATTTTTCACAATGGGGGAAACCCTGATGGAGCG  
ACGCCGCGTGGGGGATGAATGGCTTCGGCCCGTAAACCCCTGTCATTCCGGGATCAATGCG  
TTTGGGTGAATAACTCAAACGTTGATAGTACCGGAAGAGGAAGGGACAGCTAACTCTGTG  
CCAGCAGCCGCGGTAATACAGAGGTCCCAAGCGTTGTTCCGATTTACTGGGCGTAAAGGG  
TGCGTAGGTGGTTGGATAAGTCTGATGTGAAATCTCGGAGCTTAAGTCCGAAACGGCATT

GGATACTATCTAGCTTGAGAGTTGGAGGGGGGACTGGAATGCTCGGTGTAGCAGTGAAT  
GCGTAGATATCGAGCGGAACACCAGTGGCGAAGGCGAGTCCCTGGACAACTTCTGACACT  
GAGGCACGAAAGCCAAGGGAGCAAACGGGATTAGAGACCCTCGTAGTCC

>Otu14834

CCAGCCTATGGGTGGCACCAGTCGAGAATTTTTCTCAATGGGCGAAAGCCTGAAGGAGCG  
ACGCCGCGTGGGGGATGAAGGACTTCGGTTCGTAAACCCCTGTCACCTGGGAACAAACCC  
TCCGGCTTAACACGTCGGAGGCTGATGGTACCAGGAGAGGAAGGCACGGCTAACTCTGTG  
CCAGCAGCCGCGGTAATACAGAGGTGCCAAGCGTTGTTTCGGATTTACTGGGCGTAAAGGG  
TGCGTAGGCGGTTCGCGCAAGTCGGACGTGAAATCCCGGGGCTTAACCCCGGAACGGCGCT  
CGAAACTGCGCGGCTAGAGGTCTGGAGAGGTGACTGGAATTCTCGGTGTAGCAGTGAAT  
GCGTAGATATCGAGAGGAACGCCAGAGGCGAAAGCGGATCACTGGACGGAACCTGACGCT  
GAGGCACGAAAGCCAGGGGAGCAAACGGGATTAGATACCCCAGTAGTCC

>Otu14835

CCAGCCTACGGGAGGCTCCAGTAGGGAATATTGGGCAATGGGCGCAAGCCTGACCGAGCG  
ACGCCGCGTTCGGGATGAAGGCCTTCGGGTGTAAACCGCTGTCAGAGGGGATGAATGGC  
CGTAGGGTACTCCCTGCGGTTTGACATATCCTCAGAGGAAGGACGGGCTAAGTTTCGTGCC  
AGCAGCCGCGGTAAGACGAACCGTCCAAACGTTATTTCGAATCACTGGGCTTAAAGGGTG  
CGTAGGCGGTTTCGAAAGTTGGGTGTGAAAGCCCTCGGCTCAACCGAGGAATTGCGCCCA  
AACTACCGGGCTTGAGGAAGATAGAGGTGAGCGGAACCTAGGGTGGAGCGGTGAAATGC  
GTTGATATCCTAAGGAACACCAGTAGCGAAAGCGGCTCACTAGGTCTTTTCTGACGCTGA  
GGCACGAAAGCTAGGGGAGCGAAGAGGATTAGATACCCCAGTAGTCC

>Otu14842

CCAGCCTATGGGTGGCACCAGTGGGGAATATTGGGCAATGGGCGCAAGCCTGACCCAGCC  
ATGCCGCGTGAGTGATGAAGGCCTTCGGGTTCGTAAAGCTCTGTGGGGAGGGACGAAACAG  
CACGGTGCAAATACCACCGGGTCTGACGGTACCTCCTTAGCAAGCACCGGCTAACTCCG  
TGCCAGCAGCCGCGGTAATACGGAGGGTGCAAACGTTGCTCGGAATCATTTGGGCGTAAAG  
CGCACGTAGGCGGCCCCGTTAAGTCGGATGTGAAAGCCAGGGCTCAACCCCTGGAAGTGCA  
TTCGAAACTGGCAGGCTTGAATATGGAAGAGGGTTCGCGGAATTCCCGGTGTAGAGGTGAA  
GTTTCGTAGATATCGGGAGGAACACCAGTGGCGAAGGCGGCGACCTGGGCCAATATTGACG  
CTGAGGTGCGAAAGCGTGGGGAGCAAACAGGATTAGATACCCCTGTAGTCC

>Otu14844

CCAGCCTATGGGGGGCTCCAGGGACGAATCCTTCGCAATGCGCGCAAGCGTGACGAGGGG  
ACTCCGAGTGACAGACCTTAGGTTTGTCTTTTCGTGACACCAAACATCTGGCGGAATAAG  
GGCCGGGCAATATCGGTGCCAGCCGCCGCGGTAACACCGAAGGCTCAAGTGGTATCCACG  
AATATTGGGCTTAAAGAGTCCGTAGCTGGTTTGTTAAGTTCTCTGTGAAATCTTCCGGCT  
TAACCGGAAGGCGTGAGGGGGTACTGACAGGCATGGGAGTGGGGGAGGTCAGGGGTACT  
CACGGGGTAGAGGTAAAATTCTGTAATCCTGTGAGGACCACCAGTGGCGAAGGCGCCTGA  
CCAAAACATATCCGACAGTGAGGGACGAAGGCTAGGAGAACGAATCGGATTAGAAACCC  
CGTAGTCC

>Otu14858

CCAGCCTACGGGGGGCAGCAGTAACGAATATTCGCAATGGGCGCAAGCCTGACGGAGCG  
ATGCCGCGTGACAGGATGAAGCCCCTCGGGGTGTAAACTGCTGTGAGGGTTTAGGAATACC  
ATGACCAAACCCAAAGGAAGAGGCGACTAACTCTGTGCCAGCAGTCGCGGTAATACAGAG  
GCCTCAAGCGTTAATCGGAATCACTGGGCTTAAAGGGTGCGTAGGCGGGGCCGCAAGTGC  
TTTGTGAAATCCCATGGCTTAACCATGGAAGTCTTGGCAGACTGCGGTCCTTGAGGTTG  
GTAGGGGCTGCTGGAAGTCTAGGTGGAGCGGTGAAATGCGTAGATATCTAGAGGAACGCC  
AAAGGCGAAGGCAGGCAGCTGGGCCAATTCTGACGCTGAGGCACGAAAGCGTGGGGAGCG  
AACGGGATTAGATACCCGTGTAGTCC

>Otu14859

CCAGCCTATGGGTGCTGCTGCAGTCGAGGATCATTCGCAATGGGCGCAAGCCTGACGGTGCG  
ACGCTGCGTGAGGATGAAGGCCTTCGGGTGTAAACTCCTGTGCTGTGGGAACAATAGA  
TCGGTTCGTTAACACCGGCCGGTAATGATAGTACCGCAAGAGGAAGCCACGGCTAACTCTG  
TGCCAGCAGCCGCGGTAATACAGAGGTGGCAAGCGTTGTTTCGGATTTACTGGGCGTAAAG  
GGTGCCTAGGTGGCTTTGTGTGTCGGGCGTGAAATCCACCGCTCAACGGTGGAACGCCG  
CCCGAAACTGCGAGGCTGGAGTGCAGGAGAGGAGAGCGGAATTCTTGGTGTAGCGGTGGA  
ATGCGTTGATATCAAGAAGAACACCAGTGGCGTAGGCGGCTCTCTGGAATGCAACTGACA  
CTGAGGCACGAAAGCGTGGGGAGCAAACAGGATTAGAAACCCCGTAGTCC

>Otu14862

CCAGCCTACGGGATGCTGCAGTGGGGAATCTTCCACAATGGGCGAAAGCCTGATGGAGCA  
ACGCCGCGTGAGTGATGAAGGCCTTCGGGTGTAAACTCTGTCTTGCAAGAATAAGACA  
AATGGGTAAATAATCCATTTGTTTGACAGTATTGCAGGAGGAAGACACGGCTAACTCTGT  
GCCAGCAGCCGCGTAATACAGAGGTGTCAAGCGTTGTCCGGAATTATTGGGCGTAAAGG  
GCGTGTAGGCGGGTGGGTAAAGTCGGTTGTGAAATCACTGGGCTTAACCCAGTAACTGCAA  
TCGAAACTGCTTATCTTGAGTGCAAAGAGGAGAGCGGAATTCCTGGTGTAGCGGTGAAA  
TGCGTAGATATCGGGAGGAACACCAGTGGCGAAGGCGGCTCTCTGGTCTGCAACTGACGC  
TGAAACGCGAAAGCTAGGGGAGCAAACGGGATTAGATAACCCCTGTAGTCC

>Otu14868

CCAGCCTATGGGTCGCACCAGCAACGAATCTTCCCCAATGCCGGAACGGTGAGGGAGCG  
ACGCCGCGTGAGGATCAAGTCCTTCGGGATGTAAACTCCTGTTAGGGTTATGAAAGCGT  
AAGGGCCTAATACGCCCTGAGTTGATCTGACCCAGAGAAAGGGACGGCTAACTCTGTGCC  
AGCGGCCGCGTAATACAGAGGTCCCAAGCGTTACTGAGAATCACTGGGTTTAAAGGGTG  
TGTTAGGTGGCGCGTTAAGTCCGTTGTGAAATCCCTGGGCTCAACCCAGGAAGTCTTCGG  
ATACTGGCGTGCTTGAGGCCGGTAGAGGTCCTGGAACAGACGGTGGAGCGGTGAAATGC  
GTAGATATCATCTGGAACGCCGGTGGTGAAGACGGGTGACTGGGCCGGTTCTGACACTGA  
GGCACGAAAGCATGGGGAGCGAACGGGATTAGAGACCCCAGTAGTCC

>Otu14874

GGACTACAGGGGTATCTAATCCTGTTTGATCCCCACACTTTCGCACCTCAGCGTCAATCA  
TTGGCCAGGAGCTCGCCTTCGCCACTGGTATTCTTCCTGATCTCTACAGATTTACCCCT  
ACACCAGGAATTCTAGCTCCCTCTCCATGATTCAAGCCTCGCAGTTCCCAACGCAATCCC  
ATGGTTGAGCCATGGGCTTCCACGCCGGGCTTACAAAGCCGCCTACATGCCCTTTACGCC  
CAGTAATTCGGAACAACGCTTGCCCCCTACGTGTTACCGCGGCTGCTGGCACGTAGTTAG  
CCGGGGCTTATTCGTGCGTTCATGTATCCACGGGCATTCCCTCCCATGGTTATTCTTC  
CCCAACAAAAGGACTTTTACAACCTTTCGGCCTTCGTATCCACGCGGCGTCTCGTCCGTCA  
GACTTTCGTCCATTGCGGAATATTCTTAGCTGCTGCACCCCGTAGGCTGG

>Otu14877

CCAGCCTATGGGGCGCTGCAGTGGGGGATATTGCGCAATGGAGGAAACTCTGACGCAGCA  
ACGCCGCGTGAAAGGATGAAGGTCTTCGGATCGTAAACTTTTGTCTTTGGGGAAGATAATG  
ACGGTACCCAAGGAGGAAGCCACGGCTAACTACGTGCCAGCAGCCGCGGTAATACGTAGG  
TGCGGAGCGTTGTCCGGATTTACTGGGTGTAAAGGGCGTGTAGGCGGGTAGGTAAGTCAG  
ATGTGAAATGCCGCAGCTTAACTGCGGAGCTGCATTTGAAACTACTTATCTTGAGTGATG  
GAGAGGAAAGTGGAATTCCTAGTGTAGCGGTGAAATGCGTAGATATTAGGAGGAACACCA  
GTGGCGAAGGCGACTTTCTGGACATTAAGTACGCTGAGGCGCGAAAGCGTGGGGAGCAA  
ACAGGATTAGATAACCCCTGGTAGTC

>Otu14880

CCAGCCTATGGGGGGGCTGCAGTGGGGAATCTTGCGCAATGGGCGAAAGCCTGACGCAGC  
GACGCCGCGTGAGTGAAGAAGGCCTTCGGGTGTAAAGCTCTGTGAGAGGGGAAAAAGTC  
CCATATCAATAATAAGGGTATGGGGTGATGGTACCTTTAGAGGAAGCACCGGCTAACTCT  
GTGCCAGCAGCCGCGTAATACAGAGGGTGCGAGCGTTGTTGGAATTATTGGGCGTAAA  
GGGCAGGTAGGTGGTCATATAAGTCTGCTGTGAAATCCCCGAGCTTAACTTGGGAAGAGC  
GGCGGATACTGTATGGACTTGAGTGCTGGAGGGGTGCGTGGAATTCCCGGTGTAGCGGTG  
AAATGCGTAGATATCGGGAGGAACACCAGAGGCGAAGGCGGCGCACTGGACAGCAACTGA  
CACTCAACTGCGAAAGCGTGGGTAGCAAACAGGATTAGAAACCCTAGTAGTCC

>Otu14884

CCAGCCTACGGGGCGCTCCAGTGGGGAATCTTGACAATGGGGGCAACCCCTGATGCAGCG  
ACGCCGCGTGAGCGATGAAGCCCTTCGGGTGTAAAGCTCTTTCGGCCGGAACGATAATG  
ACGGTACCGGCAGAAGAAGCTGCGGCTAACTACGTGCCAGCAGCCGCGGTAATACGTAGG  
CAGCGAGCGTTGTTCCGAGTTACTGGGCGTAAAGAGTGCGTAGGCGGTGCTCTAAGTTTG  
GTGTGAAATCTCCCGGCTCAACTGGGAGGGTGCGCCGAAACTGGAGTGCTCGAGTATGG  
GAGAGGTAAGCGGAATTCCTGGTGTAGCGGTGAAATGCGTAGATATCAGGAGGAACACCT  
GCGGTGTAGACGGCTTACTGGACCATGACTGACGCTGAGGCACGAAAGCGTGGGGAGCAA  
ACAGGATTAGAAACCCGAGTAGTCC

>Otu14887

CCAGCCTACGGGGTGCTGCAGGCGCGAAAACTTTACAATGCGAGAAATCGTGATAAGGGGA  
ACTCTGAGTGCCCGTAAATCGGGCTGTCCATCTGTTTAAATAACAGGTGAAGAAAGGGC  
CGGGCAAGACCGGTGCCAGCCGCCGCGGTAATACCGGCGGCCCGAGTGGTGATCGTGTTT  
ATTGGGTCTAAAGGGTCCGTAGCCGGTTTGGTCAGTCCTCCGGGAAATCTGACGGCTTAA

CCGTTAGGCTTTTCGGGGGATACTGCCAGACTTGGAACCGGGAGAGGTAAGAGGTACTACA  
GGGGTAGGAGTGAAATCTTGTAATCCCTGTGGGACCACCTGTGGCGAAGGCGTCTTACCA  
GAACGGGTTCGACGGTGAGGGACGAAAGCTGGGGGCACGAACCGGATTAGAAACCCCAGT  
AGTCC

>Otu14891

CCAGCCTACGGGGGGCACCAGTAAGGAATTTTGGGCAATGAGGTAACCCTTGACCCGGCG  
AGAGCGCGTGATGATGAATGCGGTCAGTTTTCTGTAAAGTGCTTTAAGGAACGAAGATA  
CTGACTGTAGTTCTTAAAGAAGCACC GGCTAACTCCGTGCCAGCAGCTGCGGTAAGACG  
GAGGGTGCGGGCCTTATTCATTATGATTGGGTGTAAAGGGTGCGTAGGTGGCTACCAGCA  
TTTTTTGATAAAAATTGCAGAGAGTTCCTGTGCAGTTATCATCTACTAAAGGTATGCTAG  
AGTTGAGTTAATCGGTCATGGCAAATTCTCATGTAGTGGTTGAATCTTGGTAGATGAGAT  
TGAACACCGACAGGCGAAGGCACGTTTCTGTCTCAACTGACGTTTCAGGCACGGAAGCTA  
CGGGAGCAAACCTGGATTAGATACCCGTGTAGTCC

>Otu14893

CCTACGGGGTGCGAGCAGTCGATAATATTCCACAATGGGCGAAAGCCTGATGGAGCGACGC  
CGCGTGCGAGGATGACAGCCTTCGGGTTGTAAACTGCTTTTTTTGGGGACGAATTTCTGTGA  
CGGTACCCAAAGAATAAGAGGTTACTAACTCTGTGCCAGCAGTAGCGGTAATACAGAGAC  
CTCAAGCGTTATCCGGATTTATTGGGCGTAAAGAGCATGTAGGCGGATATATTAGTCAGA  
TGTCAAATCTTCGAGCTCAACTCGAAAACCTGCATTTGAAACGGTATATCTTGAGAGAGTG  
AGAGACTAATGGAACATATGGTGTAGCAGTGAAATGCGTTGATATCATATGGAACACCAA  
AGGCGAAGGCATTTAGTTGGCACTCTTCTGACGCTGAGATGCGAAAGCGTGGGTAGCGAA  
TGGGATTAGATACCCCCGTAGTCC

>Otu14902

CCAGCCTATGGGTTGCAGCAGCCGAAAATATTGGACAATGGGGGAAACCCTGATCCAGCG  
ACATTGCGTGAGGATGAAGTCTTCGGATCGTAAACTACTTTTCTAGGGGAAGAAGTCA  
TTGACGGTACTCTAGGAATAAGCGGGGGCTAATTCTGTACCAGCAGCAGCGGTAATACAG  
AACCCGCAAGCGTTATCCGGATTTATTGGGCGTAAAGTGTTTCGTAGGCGGCATGGAAGT  
CTGTCTTTAAATACTTCGGGCTTAACCCGGGGGAATTAAACGGAACTTCCAAGCTTGAAG  
ATGCTAGGGGGCTACTAGAACGCACGGTGTAGGGGTGAAATCCGTTGATATCGTGCGGAAT  
ACCAAAGCGAAGGCAAGTAGCTGGGGCAATCTTGACGCTGAGGAACGAAAGCGTGGGGA  
GCAAAAAGGATTAGAAACCCCTCGTAGTCC

>Otu14907

CCAGCCTATGGGGGGCAGCAGTCGAGAATATTCCACAATGGACGAAAGTCTGACGGAGCG  
ACGCCGCGTGAGCGATGAAGGCCTTCGGGTTGTAAAGTCCTTTTCGTGCGGGAATAAAGGC  
ACGGTGGAATAACCGCCGTGTCTTGACTGTACCGCAGGAAGAAGCCCCGGCTAATTACGT  
GCCAGCAGCCGCGTAATACGTATGGGGCGAGCGTTATTCGGATTTCATTGGGCGTAAAGC  
GTATGTCGGGGGCTTGTTAAGTCGAGGGTGAAATTTTCAGGCTCAACCTGAAAACAGCTC  
TCGATACTGGCAGGCTAGAGTTCGAAAGAGGAGATTGGAATTCAGGTGTAGGGGTGAAA  
TCTGTAGATATCTGGAAGAACACCAGTGGCGAAGGCGAATCTCTGGTTCGAAACTGACCC  
TTAGATACGAAAGCCAGGGGAGCAAACGGGATTAGAGACCCCTGTAGTCC

>Otu14911

CCAGCCTACGGGGTGCGAGCAGTGGGGAATCTTGACAATGGGGGAAACCCTGATGCAGCG  
ACGCCGCGTGAGCGATGAAGCCCTTCGGGGCGTAAAGCTCTTTTCGGCAGGGAAGATTATG  
ACGGTACCTGCATAAGCAGCTGCGGCTAACTACGTGCCAGCAGCCGCGGTAATACGTAGG  
CAGCGAGCGTTGTTTCGGAGTTACTGGGCGTAAAGGGTGTGCAGGCGGTTGCTTAAGTTTG  
GTGTGAAATCTCCCGGCTCAACTGGGAGGGTGCGCCGAATACTGAGTGACTAGAGTGCGG  
GAGAGGAGAGTGGAATTCCTGGTGTAGCGGTGCAATGCGTAGATATCAGGAGGAACACCG  
GTGGCGAAGGCGGCTGCCTGGACCGATATTGACGCTGAGACGCGAAAGCGTGGGGAGCAA  
ACAGGATTAGATACCCCAGTAGTCC

>Otu14913

CCAGCCTATGGGTCGCAGCAGTCGAGAATCTTCGGCAATGGGCGCAAGCCTGACCGAGCG  
ACGCCGCGTGCGGGATGAAGGCCTTCGGGTTGTAAACCGCTGTTCGGAGGGGAGGAAATGC  
ACGGGGGTTCTCCCTCGTGTTTGACCTAGCCTCAGAGGAAGTACGGGCTAAGTTTCGTGCC  
AGCAGCCGCGGTAAGACGAACCGTACGAACGTTACTCGGAATTACTGGGCTTAAAGGGTG  
CGTAGGCGGCTCAGAAAGTTGGGTGTGAAAACCTCGGCTTAACCGAGGAATAGCGCTCA  
AACTACTGGGCTTGAGGAAGATAGAGGTGAGCGGAACTTAGGGTGGAGCGGTGAAATGC  
GTTGATATCCTAAGGAACACCGGTAGCGAAAGCGGCTCACTGGGTCTTCTCTGACGCTGA  
GGCACGAAAGCTAGGGTAGCGAACGGGATTAGATACCCCTGTAGACC

>Otu14914

CCAGCCTATGGGTGGCTCCAGTGGGGAATATTGGGCAATGGGCGCAAGCCTGACCCAGCG  
ACGCCGCGTGAGCGATGAAGCCCTTCGGGGTGTAAGCTCTTTTCGACGGGAACGATAATG  
ACGGTACCCGGAGAAGAAGCTGCGGCTAACTACGTGCCAGCAGCCGCGGTAATACGTAGG  
CAGCAAGCGTTGTTCCGAATTATTGGGCGTAAAGGGTGCGTAGGCCGTTTCGTAAGTTTG  
GTGTGAAATCTCCCGCTTAACTGGGAGGGTGCGCCGAAAACCTGCGAGGCTTGAGTGTGG  
GAGAGGTAGGCGGAATTCCTGGTGTAGCGGTGAAATGCGTAGATATCAGGAGGAACACCG  
GTGGTGTAGACGGCTTACTGGACCATGACTGACGCTGATGCACGAAAGCGTGGGGAGCAA  
ACAGGATTAGATACCCCCGTAGTCC

>Otu14923

CCAGCCTATGGGTGTCACCAGTCAAGAATATTCCTCAATGGACGAAAGTCTGAAGGAGCG  
ACGCCGCGTGATGAAGAAGTCCTTCGGGATGTAAATACTTTTAACTGTGACGAATCAA  
TGACGGTAGCAGTTGAATAAGGGGCTGCTAACCTCGTGCCAGCAGCAGCGGTAATACGAG  
GGCCCCAAGCATTATCCGGATTTATTGGGCGTAAAGCGCCCGTAGACGGTTTGTACATC  
TCCTGTTAAATCACGAGGCTTAACTCGTGGCCGCGGGAGAGATGGATAAACTAGAGACT  
GGAAGAGGTAAGCAGAATTGCTGGTGTAGGGGTTAAATCCGTTAATATCAGCAAGAATAC  
TCAATGCGAAGGCAGCTTACTAGGACAGTTCTGACGTTTCAGGGACGAAAGCGTGGGGATC  
AAACAGGATTAGAAACCCCTAGTAGTCC

>Otu14929

CCAGCCTATGGGGTGCTGCAGCGACGAATCTTCCGCAATGGGCGAAAGCCTGACGGAGCG  
ATGCCGCGTGCGGGATGAAGCGGCTTTGCCGTGTAAACCGCTGTCAGGGGATAGAAACAC  
TGATCATCCCCAAAGGAAGGGCCGACTAACCCTGTGCCAGCAGTCGCGGTAATACAGGGG  
GCCCGAGCGTTAGTCGGAATCACTGGGCTTAAAGGGTGCGTAGGCCGACTGATAAGTGTC  
GCGTGAAAGCCCCTGCTCAACGGTGGAACGCGCGGCAAACTGCCAGTCTCGAGGAAGC  
TAGAGGTCGCTAGAACGCTTGGTGGAGCGGTGGAATGCGTAGATATCAAGCGGAATGCCA  
AAGGTGAAGACAGGCGACTGGGGCTTTCTTGACGCTGAGGCACGAAAGCGTGGGGAGCAA  
ACAGGATTAGAGACCCGAGTAGTCC

>Otu14931

CCAGCCTATGGGGCGCTGCAGCTAGGAATCTTGCGCAATGGGGGAAACCCTGACGCAGCG  
ACGCCGCGTGCGGGATGAAGGCCCTTCTGGTTGTAGACCGCTTTCAGCAGGGACGATTGTG  
ACGGTACCTGCAGAAGAAGCCCCGGCCAACTACGTGCCAGCAGCCGCGGTAATACGTAGG  
GGGCAAGCGTTGTCCGGATTTACTGGGCGTAAAGAGCTCGTAGGCCGTTTCGTAAGTCGA  
AAGTGAAAGCTCCAAGCTCAACTTGGAGGGGCCCTTCTGATACTGCCGTGACTAGAGTTTG  
GTAGAGGAGTGTGGAACCTCCCGGTGTAGCGGTGAAATGCGCAGAGATCGGGAAGAACACC  
AGTGCGCAAGGCGGCACTCTGGGCCAATACTGACGCTGAGGAGCGAAAGCGTGGGGAGCG  
AACAGGATTAGAGACCCTTGTAGTCC

>Otu14935

CCAGCCTACGGGGCGCACCAGTAGGGAATATTGCACAATGGGCGAAAGCCTGATGCAGCG  
ACGCCGCGTGAGGGATGAAGGGCTTCGGCTCGTAAACCTCTGTGAGGTGGGGCGATGGGA  
CGGATGGCTAATATCCATTCTGTTTTGACGGTACCACCGGAGGAAGCACC GGCTAACTACG  
TGCCAGCAGCCGCGGTAATACGTAGGGTGCAAGCGTTGCTCGGAATCACTGGGCGTAAAG  
GGTGAGTAGGTGGATTTTTGGTAAGTCAGATGTGAAAGCCTTGGGCTTAACTCAAGAAGT  
GCATTTGATACTGCCAGTCTAGAGTTCGGGAGAGGGAGGCGGAATTCCAGGTGTAGGGGT  
GAAATCCGTAGATATCTGGAGGAACACCAGTGGCGTAAGCGGCCTCCTGGACCGATACTG  
ACACTGAATCACGAAAGCGTGGGGATCAAACAGGATTAGAGACCCTGGTAGTCC

>Otu14970

CCAGCCTACGGGACGCACCAGTAGGGAATATTGGACAATGGGCGAAAGCCTGATCCAGCC  
ATGCCGCGTGAGTGATGAAGGCCCTAGGGTTGTAAAGCTCTTTCGGCGGGGAAGATAATG  
ACGGTACCCGCAGAAGAAGCCCCGGCTAACTTCGTGCCAGCAGCCGCGGTAATACGAAGG  
GGGCTAGCGTTGTTCCGAATCACTGGGCGTAAAGCGCGCGTAGGCCGATTGTTAAGTCAG  
GGGTGAAATGCCGAGGCTCAACCTCGGAACTGCCTTTGATACTGGCAATCTTGAGTCCGG  
GAGAGGTGAGTGGAACCTCTAGTGTAGAGGTGAAATTCGTAGATATTAGGAAGAACACCA  
GTGGCGAAGGCGGCTCACTGGCCCGGTACTGACGCTGATGTGCGAAAGCGTGGGGAGCAA  
ACAGGATTAGATACCCCCGTAGTCC

>Otu14972

CCAGCCTATGGGACGCAGCAGTGGGGAATATTGGGCAATGGGGGAAACCCTGACCCAGCA  
ACGCCGCGTGAAAGGAAGAAGGCCCTCGGGTTGTAAACTTCTTTGACCAGGGAAGAAACAA  
ATGACGGTACCTGGAAAACAAGCCACGGCTAACTACGTGCCAGCAGCCGCGGTAATACGT

AGGTGGCAAGCGTTGTCCGGATTTACTGGGTGTAAAGGGCGCGTAGGCGGGACTGCAAGT  
CAGATGTGAAATCTGGGGGCTTAACCCCTCAAAGTGCATTTGAAACTGTGGTTCTTGAGTA  
TCGGAGAGGCAGGCGGAGTTCCCTAGTGTAGCGGTGAAATGCGTAGATATTAGGAGGAACA  
CCAGTGGCGAAGGCGGCCTGCTGGACGACAAGTACGCTGAGGCGCGAAAGCGTGGGGAG  
CAAACAGGATTAGATACCCGCGTAGTCC

>Otu14977

CCAGCCTACGGGAGGCAGCAGTGGGGAATATTGGGCAATGGGCGAAAGCCTGACCCAGCC  
ACGCCGCGTGAGTGATGAAGGCCTTCGGGTCGTAAAGCTCTGTGGGGAGGGACGAATAAG  
CACGGACCTAATACGTCCGGGCCCTGACGGTACCTCCTTAGCAAGCACCGGCTAACCATG  
TGCCAGCAGCCGCGGTAATACATGGGATGCAAGTGTTATTTCGGAATCATTTGGGCGTAAAG  
CGTTTGTAGGTGGACCTGTAAGTCTTTTGTAAATCTTTGGGCTCAACCTAAAATGCGCA  
AACGAACTGCTTGTCTTGAGTCAGATAGAGGTAAAGGGAATTTCCAGTGGAGCGGTGAA  
ATGCGTAGATATTGGAAGGAACACCAGCGGCGAAGGCACTTTACTGGGTCTGTACTGACA  
CTGAGAGACGAAAGCTAGGGGAGCAAACAGGATTAGAAACCCGAGTAGTCC

>Otu14989

CCAGCCTACGGGGGGCAGCAGTAGGGAATATTGGACAATGGGCGCAAGCCTGATCCAGCC  
ATCCCGCGTGAAGGATTAAGGCCCTATGGGTTGTAAACTTCTTTTGTACGGGACGAAACT  
CCCCGACGTGTCGGGGACTGACAGTACCGTGCGAATAAGCAACGGCTAACTCCGTGCCAG  
CAGCCGCGGTAATACGGAGGTTGCAAGCGTTATCCGGATTTATTGGGTTTAAAGGGTGCG  
TAGGCGGAATAATAAGTCAGTGGTGAAAGCCTGTAGCTTAACTATAGAATTGCCATTGAT  
ACTGTTGTTCTTGAGTGCAGTTGAGGTAGGCGGAATGTGTAATGTAGCGGTGAAATGCTT  
AGATATTACACAGAACACCAATTGCGTAGGCAGCTTACTAACTGTAAGTACGCTGAGG  
CACGAAAGCGTGGGGAGCAAACAGGATTAGAAACCCGTGTAGTCC

>Otu14993

CCAGCCTATGGGGGGCAGCAGTCGAGAATCTTTCGCAATGGGGGAAACCCTGACGAAGCG  
ACGCCGCGTGACAGGACGAAGGTCTTCGGATTGTAAACTGCTGTTCGGCTGGGAAGAAAAAG  
TGAATTGTTAAACAATAATTCGCCTTGACGGTACCAGCAAAGGAAGCCACGGCTAACTCTG  
TGCCAGCAGCCGCGGTAATACAGAGGTGGCAAGCGTTGTTTCGGATTTATTGGGCGTAAAG  
GGTCCGTAGGCGGCCTAAAAAGTCGGATGTGAAAGCCACAGCTCAACTGTGGAATGGCA  
TTCGAACTTTTAGGCTCGAGTGTGAAAGGGGTAAAGGGAATTTCCCGGTGTAAGGGTGAA  
ATCTGTAGAGATCGGGAAGAACACCAGTCGCGAAGGCGCTTTACTGGTTCACAACTGACG  
CTGAGGGACGAAAGCTAGGGGAGCAAACGGGATTAGATACCCCGTAGTCC

>Otu14998

CCAGCCTACGGGTGGCTCCAGTGGGGAATCTTCCACAATGGGCGAAAGCCTGATGGAGCA  
ACGCCGCGTGAGTGATGAAGGCCTTCGGGTTGTAAAGCTCTTTCGTGCGAGAATAAAGCT  
GCAAGGTGAATAATCTTGACGTCTGACTGTATCGCAGGAAGAAGACACGGCTAACTCTGT  
GCCAGCAGCCGCGGTAATACAGAGGTGTCTAGCGTTGTCCGGAATTACTGGGCGTAAAGG  
GCGCGTAGGTGGGCGTGTACGTTCGGATGTGAAATCACCGGGCTTAACCCGGTAACTGCAT  
CCGAACTACACGTCTTGAGTGCAGAAGAGGAGAGTGGAATTTCCAGTGTAGCGGTGAAA  
TGCGTAGATATTGGGAGGAACACCAGTGGCGAAGGCGGCTCTCTGGTCTGCAACTGACAC  
TGAAGCGCGAAAGCTAGAGGAGCAAACGGGATTAGATACCCCTGTAGTCC

>Otu14999

CCAGCCTACGGGGTGCAGCAGTCGAGAATCTTCGGCAATGGGGGAAACCCTGACCGAGCG  
ACGCCGCGTGCGGGATGAAGGCCTTCGGGTTGTAAACCGCTGTCAAGTGCAGGAGGAATGC  
GTGGGGGTTCTCCCCCATGTTTGACCTATGCGCAGAGGAAGGACGGGCTAAGTTTCGTGCC  
AGCAGCCGCGGTAATACGAACCGTCCAAACGTTATTTCGGAATCACTGGGCTTAAAGGGTG  
CGTAGGCGGTCCGGTAAGTTGGGTGTGAAATACCTCGGCCTAACCGAGGAATGGCGCCCA  
AACTGTTCGACTCGAGGAAGGCAGAGGTGAACGGAACCTAGGGTGGAGCGGTGAAATGC  
GTTGATATCCTAAGGAACACCAGTAGCGAAAGCGGTTCACTGGGCCTTTTCTGACGCTGA  
TGCACGAAAGCCAGGGGAGCGAACGGGATTAGAAACCCCTAGTAGTCC

>Otu15001

CCAGCCTACGGGATGCTCCAGTGGGGAATCTTGCGCAATGGGCGAAAGCCTGACGCAGCA  
ACGCCGCGTGAGCGAAGACGGCCTTCGGGTTGTAAAGCTCTGTCAAGGAGGGACGAGGCCA  
CTCAGGTTAATAGCCGAGAGGGTGACGGTACCTCCAGAGGAAGCCCCGGCTAACTACGTG  
CCAGCAGCCGCGGTAATACGTAGGGGGCAAGCGTTGTCCGGAATCATTTGGGCGTAAAGCG  
CGTGTAGGCGGCCATCCAAGTCCGATGTGAAAGCTCGGGGCTCAACCCCGAGTCTGCATT  
GGAACTGGTTGGCTAGAGTCCGGAAGAGGAGACTGGAATTCCTGGTGTAGCGGTGAAAT  
GCGCAGATATCAGGAAGAACACCGGTGGCGAAGGCGGGTCTCTGGGACGGTACTGACGCT

GAGACGCGAAAAGCGTGGGGAGCAAACAGGATTAGAGACCCTAGTAGTCC

>Otu15011

CCAGCCTACGGGGCGCTCCAGTAGGGAATATTGGTAATCTGCGAAAGCGGGAACCAGCAA  
CGCCGCGTGTGCGATGAAGGCCCTTCGGGTCGTAAAGCACTTTTTGAGGGGACGAGGAAGG  
ACGGTACCCTCAGAATAAGTCTCGGCTAACTACGTGCCAGCAGCTGCGGTAACACGTAGG  
AGACGAGCGTTATTTCGGAATTACTGGGCGTAAAGCGCGTGCAGGCGGGCCGGCAAGTCTG  
ATGTGAAAGCCCCGGGCTTAACCTGGGAAGTGCATTGGAAACTGCTGGTCTTGAGTTCTG  
GAGAGGAAGGGGGAATTCCCAGGTGTAGAGGTGAAATTCGTAGAGATCGGGAGGAATACCA  
GTGGCGAAGGCGCCCTTCTGGACGGCAACTGACGCTGAGACGCGAAAAGCGTGGGGAGCAA  
ACAGGATTAGATACCCGTGTAGTCC

>Otu15018

CCAGCCTACGGGGTGCAGCAGTGGGGAATATTGGACAACGGGCGCAAGCCTGATCCAGCC  
ATGCCGCGTGAGTGACGACGGCCTTAGGGTTGTAAAGCTCTTTCGCCAGGGACGATAATG  
ACGGTACCTGGAGAAGCAGCTGCGGCTAACTACGTGCCAGCAGCCGCGGTAATACGTAGG  
CAGCAAGCGTTGTTTCGAGTTACTGGGCGTAAAGGGTGTGTAGGCGGTTCTTTAAGTTTG  
GTGTGAAATCTCCCGGCTTAACCGGGAGGGTGCGCCGAATACTGAGGGACTAGAGTACGG  
GGGAGGAAAGTGGAATTCCTGGTGTAGCGGTGAAATGCGTAGATATCAGGAGGAACACCG  
GTGGTGTAGACGGCTTCTTGACCGTAACCTGACGCTGAAACACGAAAGCGTGGGTAGCAA  
ACAGGATTAGAACCCCTGTAGTCC

>Otu15020

CCAGCCTATGGGTGGCAGCAGTGGGGAATATTGGACAATGGGCGAAAAGCCTGATCCAGCG  
ACGCCGCGTGAGCGATGAAGCCCTTCGGGGTGTAAGCTCTTTCGACGGGAACGATAATG  
ACGGTACCCCTAAAGGAAGCACCGGCTAACTCCGTGCCAGCAGCCGCGGTAATACGGGGG  
GTGCAAGCGTTGTTTCGGAATTATTGGGCGTAAAGCGCGTGTAGGCGGTTTGTAAAGTCTG  
ATGTGAAAGCCCTGGGCTCAACCCAGGAAGTGCATTGGATACTGGCAGACTTGAATACGG  
GAGAGGGTAGTGGAATTCCTGGTGTAGGAGTGAAATCCGTAGATATCAGGAGGAACACCG  
GTGGCGAAGGCGGCTGCCTGGACCGATATTGACGCTGAGACGCGAAAAGCGTGGGTAGCAA  
ACAGGATTAGATACCCGCGTAGTCC

>Otu15022

CCAGCCTATGGGATGCTCCAGGCGCGAAAACCTTTACAATGCTGGAAACAGCGATAGGGGG  
ACCTCGAGTGCCACCGTACAACGGTGGCTGTCGTTGTGTCTAAAAAACACGATATAGCAA  
GGGCCGGGCAAGACCGGTGCCAGCCGCCGCGGTAACACCGGCGGCTCGAGTGGTAACCGC  
TATTATTGGGTTTAAAGGGTCTGTAGCCGGCCGGATAAGTCTCTTGGGAAATCTGGCAGC  
TCAACTGTCAGGCTTTCAGGAGATACTGTTTCGGCTCGAGACCGGGAGAGGTGAGAGGTAC  
TTCAGGGGTAGGAGTGAAATCCTGTAATCCTTGGGGGACCACCTGTGGCGAAGGCGCCTC  
ACCAGAACGGCTCCGACAGTGAGGGACGAAAGCTGGGGGAGCAAACCGGATTAGATACCC  
GCGTAGTCC

>Otu15044

CCAGCCTACGGGGGGCTGCAGTCGCGAATCTTTTGCAATGCACGAAAGTGTGACAAAGCG  
AGCCAAAGTGCTTTCGCGACAGGAAAGCTTTTATTTCGCTCTAAAAAGGCGGATGAATAAG  
GACTGGGCAAGACCGGTGCCAGCCGCCGCGGTAATCCCGGCAGTCCAAGTTGCAGCCATT  
ATTATTGGGTCTAAACATCCGTAGCTTGCTGAATAAGTTTCTTGTGAAATTCTACATCT  
CAAGGGTAGAGCGCGGAGAAATACTATTTCAGCTAGAGACCGGTAGATGTGGGGAGTATG  
CTTAAGGTAGTGGTAAAATACGTTAATCTTAGGCAGACTAACAATTGGCGAAGGCACCCT  
ACAAGGACGGATCTGACAGTGAGGGATGAAGGCCAGGGGCGCAAACCGGATTAGAGACCC  
CTGTAGTCC

>Otu15049

CCAGCCTACGGGGTGCTCCAGTGGGGAATTTTTCGCAATGGGCGAAAAGCCTGACGCAGCA  
ACGCCACGTGGGTGATGAAGGTCTTCGGATCGTAAACCCCTGTCGTCAGGGACGAAGGTT  
GCATGTCGAATAGATGTGCAACTTGACGGTACCTGGAGAGGAAGCCCCGGCTAACTCTGT  
GCCAGCAGCCGCGGTAATGCAGAGGGGGCAAGCGTTATTTCGGAATTATTGGGCGTAAAGG  
GCGCGTAGGCGGTGACGTAAGTGAGATGTGTAATCCCCGAGCTTAACTTGGGAACTGCAT  
CTCAGACTGTGTCGCTAGAGTACTGGAGAGGGTGGTAGAATTCACGCTGTAGCGGTGAAA  
TGCGTAGAGATGTGGAGGAATACAGTGGCGAAGGCGGCCACCTGGACAGTAACCTGACGC  
TGAGGCGCGAAAAGTGTGGGGAGCAAACAGGATTAGAAAACCCCGTAGTCC

>Otu15072

CCAGCCTATGGGACGCAGCAGTAGGGAATATTGGACAATGGGCGCAAGCCTGATCCAGCA  
ATGCCGCGTGAGTGATGAAGGCCCTTAGGGTTGTAAAGCTCTTTCGCACGCGACGATAATG



ACGGTAGTGCGAGAAGAAGCTCCGGCTAACTTCGTGCCTGCAGCCGCGGTAATACGAAGG  
GGGCTAGCGTTGTTTCGGAATTACTGGGCGTAAAGCGCGCGCAGGCGGTCTTCCAAGTCGG  
TGGTGAAAGCCCCGAGCTCAACTCCGGAAGTCCATTGAAACTGTGAGACTTGAGTATGA  
GAGAGGTGAGTGGAATTCAGTGTAGAGGTGAAATTCGTAGATATTGGGAAGAACACCG  
GTGGCGAAGGCGGCTCACTGGCTCATTACTGACGCTCAGGCGCGACAGCGTGGGGATCAA  
ACAGGATTAGAAACCCTAGTAGTCC

>Otu15099

CAAGCCTATGGGGTGCAGCAGTAGGGAATCTTCCGCAATGGACGAAAGTCTGACGGAGCA  
ACGCCGCGTGAGTGATGAAGGTTTTTCGGATCGTAAAGCTCTGTTGCCAGGGAAGAACAGC  
CAGGCGAGTAACTGCGCTTGGAATGACGGTACCTGAGAAGAAAGCCCCGGCTAACTACGT  
GCCATCAGCCGCGTAATACGTAGGGGGCAAGCGTTGTCCGGAATTATTGGGCGTAAAGC  
GCGCGCAGGCGGCTTTGTAAAGTCTAGTGTTTAAGGTCGGGGCTCAACCCCGATACGCACG  
GGAAACTGCAAGGCTTGAGTACAGAAGAGGAAAGTGAATTTCTACGTGTAGCGGTGAAAT  
GCGTAGAGATGTGGAGGAACACCAGTGGCGAAGGCGACTTTCTGGGCTGTAAGTACGCT  
GAGGCGCGAAAGCGTGGGGAGCAAACAGGATTAGAAACCCTAGTAGTCC

>Otu15103

CCAGCCTATGGGGGGCTGCAGTGAAGAATTTTGGGCAATGGACAGATGTCTGACCCAGTG  
AGAATACGTGCATGACGAAGGCGCCTAGTTTTCTGTAAAGTGCTTTTCGGCGACGAGGAAA  
AGGTCTGTAGTCGTTAGAAGAAGCACC GGCCA ACTCCGTGCCAGCAGCCGCGGTAAGACG  
GAGGGTGCGGGCGTTATTTCGTTTTGATTGGGTGTAAAGGGTATGTAGGCGGGTACAGAAA  
ATTTTAGACAAAAGAGCGAAGTGCTCCTGCGCGCTGTCTTATTTATAAACTAGTACCTTG  
AGTTGAAGAAAGGTTGGAGTAATTTTCTGCGTAGGGGTAAAATCCTTTTAGACAGGAACG  
AACGTCAGCGGGCGGAGGCGTCTTTCTGCGTTCAACTAACGCTAAGGTACGGAAGCTTAG  
GTCGCAAACGGGATTAGATACCCCTGTAGTCC

>Otu15133

CCAGCCTATGGGATGCTCCAGTGGGGAATTTTGGACAATGGGGGAAACCCTGATCCAGCA  
ATGCCGCGTGTTGAAGAAGGCCTTCGGGTGTAAAGCACTTTTGTCCGGAAAGAAATCC  
TCTTCGATAATACCGAGGGGGATGACGGTACCGGAAGAATAAGCACCGGCTAACTACGT  
GCCAGCAGCCGCGTAATACGTAGGGTGCAAGCGTTAATCGGAATTACTGGGCGTAAAGC  
GCGCGCAGGCGGTCTTCCAAGTCAGTGGTGAAAGCCCGGAGCTCAACTCCGGAAGTCCCA  
TTGAAACTGTGAGACTTGAGTACGAGAGAGGTGAGTGAATTTCCAGTGTAGAGGTGAAA  
TTCGTAGATATTGGGAAGAACACCGGTGGCGAAGGCGGCTCACTGGCTCGTAACTGACGC  
TCAGGTGCGACAGCGTGGGGATCAAACAGGATTAGAGACCCTAGTAGTCC

>Otu15134

CCAGCCTACGGGACGCTGCAGTGGGGAATATTGGACAATGTGCGAAAGCATGATCCAGTG  
ATATTTACAGAGTGAGAAACGGACAGTGACATCACTGTAAAGCTCTTTTGGCAATGAAGA  
TAATGACATTAGTTGCAGATATAAGCACTGGCTAATTCTGTGCCAGCAGCCGCGGTAAGA  
CAGGTAGTGCATACGTTATTCATCATAATTGGGTGTAAAGGGTATGTAGGTGGCTTTGGT  
TTGGATATTTTGTAAACAGTTTCGGGTAAATCCCTTAAAAAGACAAAATTTACCCAGAAGC  
TAAAGAGTTTATAATAAGTAAATAGAATTTCTTGTGTAAAGGTAGAATCTCTACATATTG  
GAACGACTGCTAACATAGTTGCGAAGGCTTTTATCTTGTTTAAACTGACGCTAAGATACG  
AAAGTGTAGGTATCGAAAAGGATTAGATACCCCTGGTAGTCC

>Otu15141

CCAGCCTATGGGGGGCACCAGTGGGGAATACTGGACAATGAGCTAACGCTTGATCCGGCA  
ATATTAACGAAAGAAGTGAAGTGATGAGCTGTAAATTCATAACGCTAATTCATTTAA  
AATGAATGGATTGGTAAAGCCCCGACTAACTTCGTGCCAGCAGTCGCGTAATACGGAGG  
GGCAAGTGTTACTCATCTTGACTAGGCGTAAAGGGTAATAAGGTGGTTAAAGTTTGTTT  
TAATAGAAATTTGATTGAACTATCAAAATTTATTAATAAACAATTTAACTAGAGTATA  
TTGGAGAATAGAATTACTGATTTTTGAGGGGTAGAATCCGACGAGAAGACCAGGAGGCAC  
AAAGGCGAAAGCAGCTATTTATGATATCCTAACATTGATTTACAAAAGCGTGGGGAGCAA  
ACAGGATTAGAGACCCCGTAGTCC

>Otu15142

CCAGCCTACGGGTCGCACCAGTCGAGAATTTTTCACAATGGGGGAAACCCTGATGGAGCG  
ACGCCGCGTGAGGACGAAGGCCTTCGGGTGTAAACTCCTGTCATGCGGGAACAAGAAA  
GTGATAGTACCGCAAGAGGAAGAGACGGCTAACTCTGTGCCAGCAGCCGCGGTAATACAG  
AGGTCTCAAGCGTTGTTTCGGATTTCATTGGGCGTAAAGGGTGCGCAGGCGGCGTGGTAAAGT  
TGAGTGTGAAATCTCGGAGCTTAACTCCGAAACTGCACTCAATACTGCCATGCTCGAGGA  
CTGTAGAGGAGAGTGGAATTCACGGTGTAGCAGTGAAATGCGTAGATATCGTGAGGAAGA

CCAGTTGCGAAGGCGACTCTCTGGGCGAGTTCCTGACGCTCATGCACGAAGGCCAGGGGAG  
CAAACGGGATTAGATACCCCCGTAGTCC  
>Otu15143  
CCAGCCTACGGGGGCTGCAGTAAGGAATCTTCCGCAATGGACGAAAGTCTGACGGAGCAA  
CGCCGCGTGCAGGATGACGGCCTTCGGGTGTAAACTGCTTTTATTTGGGAAGATTATGA  
CGGTACCAAATGAATAAGGACCGGCTAACACGTGCCAGCAGCCGCGGTAATACGTAGGG  
TCCAAGCGTTATCCGGAATCACTGGGCGTAAAGCGTGCCTAGGCGGTGCTTTTAGTGCAA  
TGCGAAATCCTGTGGCTCAACCATAACGACTGTATTGCATACTGGAGTACTAGAGGACAT  
GAGAGGCAAGTGGAATTACCGGTGTAGCAGTGAAATGCGTAGATATCGGTAGGGACACCA  
ATGGCGAAGGCAGCTTGCTGGCATGTATCTGACGCTAAGGCACGAAAGCGTGGGGAGCGA  
ACAGGATTAGAAACCCCAGTAGTCC  
>Otu15144  
CCAGCCTATGGGACGCTCCAGTTCGGAATATTCGGCAATGGACGAAAGTCTGACCGAGCG  
ACGCCGCGTGCGGGATGAAGGCCCTATGGGTGTAAACCGCTTTCGCGAGTAGGCAAATC  
AAGGCTATTTAACAAATAACTTTGTTGAGTAAGGCTCGTAAAGAAGCCCCCGCTAATCAC  
GTGCCAGCAGCGCGGTAATACGTGAGGGGCGAACGTTGTTTCGGTGTCACTGGGCTTAAA  
GGGTGCGTAGGTGTTTCTGTAAGTAAGGTGTGAAATCCCTCGGCTTACCCGGGGAATTGC  
ATTTTATACTGCAGGACTTGAGGGCTAAAGGGGAAAAGGGAAGTCCAGGTGTAGCGGTGA  
AATGCGCAGATATCTGGGGGAAGGCCGCGCGCGAAGGCGCTTTTCTGGTTAGTACCTGAC  
ACTGAGGCACGAAAGCGTGGGGAGCAAACAGGATTAGAGACCCCAGTAGTCC  
>Otu15145  
CCAGCCTATGGGGGGCAGCAGTGGGGAATATTGGACAATGGGCGCAAGCCTGACGCAGCA  
ACGCCGCGTGTGTGATGAAGGTCTTCGGATCGTAAAGCACTGTCGCGAGGGACGAGAAGC  
CGTGGGTGAATAATCTACGGATAGGACGGTACCTCGAGAGGAAGCACCGGCTAACTCTGT  
GCCAGCAGCCGCGGTAATACAGAGGTGCGAGCGTTGTTTCGGAATTATTGGGCGTAAAGC  
GCTTGTAGGCGGTTTAATAAGTCTACTGTGAAAGCCCTCGGCTCAACCGAGGAAGAGCAG  
TAGATACTGTTGAACTTGAATGCCGGAGAGGGTTCGCGGAATTCCTCGGTGTAGAGGTGAAA  
TTCGTAGATATCGGGAGGAACACCAAGTGGCGAAGGCGGCGACCTGGACGGACATTGACGC  
TGAGACGCGAAAGCGTGGGGAGCAAACAGGATTAGAAACCCCAGTAGTCC  
>Otu15151  
CCAGCCTATGGGAGGCAGCAGAGGGGAATATTGGACAATGGGCGCAAGCCTGATCCAGCA  
ATGCCGCGTGAGTGAAGAAGGTCTTCGGATTGTAAAGCTCTTTCGACGGGGACGATGATG  
ACGGTACCCGTAGAAGAAGCCCCGGCTAACTTCGTGCCAGCAGCCGCGGTAACACGAAGG  
GGGCAAGCGTTGTTTCGGAATTACTGGGCGTAAAGGGCGCGTAGGCGGTGCACTAAGTCAG  
GCGTGAAAGCCCTGGGCTCAACCCGGGAATTGCGCTTGATACTGGTGCCTCGAATCCAG  
GAGAGGTTGGTGGAATTCACAGTGTAGAGGTGTAATTCGTAGAGATTGGGAAGAACACCG  
GTGGCGAAGGCGGCCAACTGGACTGGTATTGACGCTGAGGCGCGAAAGCGTGGGGAGCAA  
ACAGGATTAGAAACCCGAGTAGTCC  
>Otu15171  
CCAGCCTACGGGTCGCTCCAGTCGAGAATATTTAGCAATGGGCGAAAGCCTGACTATGCG  
ACGCCGCGTGAGGGATGAAGGATTTTCGGCTCGTAAACCTCTTTTGGCAGGGAAGAAAAAG  
TTATGGTTAATAGCCATAAACTGACGGTACCTGCAGAATAAGCCACGGCTAACTCCGTG  
CCAGCAGCCGCGGTAATACGGAGGTGGCTAGCGTTACTCGGAATTATTGGGTGTAAAGGG  
CAAGTAGGCGGCTTGGAAGTAGGGGGTGAATACTCCGGCTCAATCGGAGAAGTGCCTT  
CTAAACTGCCAGGCTTGAGTATGACAGAGGAATATGGAATTCTCGGTGTAAGGGTGAAT  
CTGTAGATATCGAGAAGAACACCAGCGGCGAAGGCGATATTCTGGGTCATTACTGACGCT  
AAATTGCGAAAGCTAGGGGAGCAAACAGAATTAGAGACCCTTGTAGTCC  
>Otu15177  
CCAGCCTACGGGGCGCTGCAGTAAGGAATATTGGTCAATGGACGCAAGTCTGAACCAGCC  
ATGCCGCGTGAGGATGAAGGCCCTCTGGGTGTAAACTCTTTTATTTGGGACGAAACA  
CTTCTTTTCTAAGGAGCTTGACGGTACCAGATGAATAAGCACCGGCTAACTCCGTGCCAG  
CAGCCGCGGTAATACGGAGGGTGCAAGCGTTATCCGGATCACTGGGTTTAAAGGGTGCG  
TAGGCGGACATGTAAGTCCGTGGTGAAATCTCTAAGCTTAACTTGGAAGTGCATGGAT  
ACTATATGTCTTGAATGTTGTGGAGGTTAGCGGAATATGTCATGTAGCGGCGAAATGCAT  
AGATATGACATAGAACACCAATTGCGAAGGCAGCTGGCTACACAAATATTGACGCTGAGG  
CACGAAAGCGTGGGGATCAAACAGGATTAGATACCCGGGTAGTCC  
>Otu15179  
CCAGCCTATGGGACGCAGCAGTAGGGAATATTGGACAATGGGCGGGAGCCTGATCCAGCC

ATGCCGCGTGCAGGAAGAAGGCCTTCTGGGTGTGAACTGCTTTTGCCAGGGGATAAAAA  
GCCCGTGC CGGGAAATTGAAGGTACCTGGTGAATAAGCCACGGCTAACTACGTGCCAGC  
AGCCGCGGTAATACGTAGGTGGCAAGCGTTGTCCGGATTTATTGGGTTTAAAGGGTGCGT  
AGGCGGTGTGGCAAGTCCGTAGTGAATCTCTGGGCTTAACCCAGAGGCTGCTGCCGAAA  
CTGCCATGCTAGAGTGTGAGAGAGGCGAGTGAATTACGGGTGTAGCGGTGAAATGCGTA  
GATATCCGTAGGAACATCCGAGGCGAAGGCGGCTCGCTGGATCACAACGACGCTGAGGG  
ACGAAAGCTAGGGGAGCAAACAGGATTAGAAACCCGCGTAGTCC

>Otu15206

CCAGCCTATGGGGTGCACCAGGCGCGAAAACTTTACAATATACGAAAGTGTGATAGGGGA  
ATCCAGAGTGCTTACCTTTTAGGTAAGCTTTTGCCAAGAGTAAATATCTTGGAGAATAAG  
TGGTGGGCAAGACTGGTGCCAGCCGCGCGGTAACACCAGCGCCACGAGTAGGAGCCGCT  
TTTATTTGGCCTAAAGCATCCGTAGCCGGATTTGCAAATCCTTTGTGAAATTGTTGGGCT  
TAACCTAACAGCGTGCAAAGGACACTACATTTCTTGAGACTGGAGAGGAGTTAGAGGTAT  
TCTATGGGGAGCGGTAAAATGCTATAATCCTTAGAAGACCACCTGTGGCGAAGGCGTCTA  
ACTAGAACAGTTCTGACGGTGAGGGATGAAAGCTGGGGGAGCGATCCGGATTAGAACCC  
CGTAGTCC

>Otu15207

CCAGGCCTATGGGACGCAGCAGTCGGGAACTTCTGCAATGCGCGCAAGCGTGACAGAGC  
TAGTCAGAGTGATTTTCTATAATTGAAAATCTTTTGTGGAATGCAAAAAGTTCCACGAAT  
AAGGACCGGGCAAGACTGGTGCCAGCCGCGCGGTAATCCCAGCGGTCCAAGTCGCAGCC  
ACGTTTATTGGGTCTAAGACATCCGTAGCTTGCTTTACAAGTTTCTTGTGAAATCTGGCC  
TCTTAAGGGTCGGGCGTGCAAGAAATACTGTAAAGCTAGAGACCGGGAGACGTAATGAGT  
ACTAATGGAGTAGCGGTAAAATGCGTTGATCCTATTGGGACTAACAACAGCGAAGGCACG  
TTACGAGAACGGATCTGACAGTGAGGGATGAAGGCTAGGGGCGCAAAGTGGATTAGAAAC  
CCGTGTAGTCC

>Otu15208

CCAGCCTACGGGGTGCAGCAGTGAGGAATATTGGTCAATGGGCGGAAGCCTGAACCAGCC  
ATCCCGCGTGCAGGAAGAAGGCGCTATGCGTCGTAACTGCTTTTCCAGGGGAAGAAAAGC  
CCACTACGTGTAGTGGTTTGC CGGTACCTTGGGAATAAGCATCGGCTAACTCCGTGCCAG  
CAGCCGCGGTAATACGGAGGGTGCGAGCGTTATCCGGATTTATTGGGTTTAAAGGGTGCG  
TAGGCGGATTAATAAGTCAGTGGTGAAAACCTTCAGCTTAACTGGAGACTTGCCATTGAT  
ACTGTTAGTCTTGAGTACGGTCAAGGTAGGCGGAATGTGTAATGTAGCGGTGAAATGCTT  
AGATATGACACAGAACACCGATTGCGAAGGCAGCTGACGAACTGTAACTGACGCTGAGG  
CACGAAAGCGTGGGGATCAAACAGGATTAGAAACCCGAGTAGTCC

>Otu15228

CCAGCCTATGGGTGGCAGCAGTCGAGAATATTCCACAATGGGGGAAACCCTGATGGAGCG  
ACACCGCGTGGGGGATGAAGGCCTTTGGGTCGTAAACCCCTTTTGCTTGGGACGAAGCGC  
AAGCTGACGGTACCAAGCGAATAAGAGGTTGCTAACTCTGTGCCAGCAGCAGCGGTAATA  
CAGAGACCTCAAGCGTTATCCGGATTTACTGGGCGTAAAGCGTCCGTAGGTGGTTTGGTA  
AGTCATCTGTCAAATCCCGGTGCTCAACATCGGGGCTGCGAATGATACTGCCAACTTGA  
GGATGGAAGAGGCAAGAGGAACTGCCGGTGTAGTAGTAAAATGCGTTAATATCGGCAGGA  
ACACCAAAGGCGAAGGCATCTTGCTGGGACATTCTTGACACTCAGGGACGAAAGCGTGGG  
GAGCAAAACGGATTAGATACCCTAGTAGTCC

>Otu15234

CCAGCCTATGGGGGGCTGCAGTCGAGAATCTTTCACAATGGGGGCAACCCTGATGGAGCG  
ACGCCGCGTGGAGGATAAGGTCTTCGGATTGTAACTCCTGTCATGCGAGAGCAAGGCCC  
ATGAGTTAACACCTCATGTGCTTGATAGTATCGCAAGAGGAAGAGACGGCTAGCTCTGTG  
CCAGCAGCCGCGGTAATACAGAGGTCTCAAGCGTTGTTTCGGAATCACTGGGCGTAAAGGG  
TGTGCAGGCTGCGTGTTAAGTCAGATGTGAAATCCCGGGGCTCAACCTCGGAACCTGCATC  
CGATACTGGCATGCTAGAGAACTGGAGAGGAGTCTAGAATTCACGGTGTAGCGGTGAAAT  
GCGTAGATATCGTGAGGAATACCAAGTGCGAAGGCAGGACTCTGGACATTTTCTGACGCT  
GAGACACGAAGGCCAGGGGAGCAGACGGGATTAGAAACCCGCGTAGTCC

>Otu15235

CCAGCCTACGGGTGGCTGCAGTGGAGAATTTTGTGCAATGGGCGAAAGCCTGACACAGCG  
ACACCGCGTGCAGGATGAAGGCCCTCGGGTCGTAACTGCGGTAGTATGGTAAGAATGTA  
AATGACTGT CATACGGAAAGAGGTGGGTAACTACGTGCCAGCACCAGCGGTAATACGTAG  
ACCTCAAGCGTTATTTCGGATTTATTGGGCGTAAAGAGCATGTAGGAGGTTTCGCGCGTCT  
TTTGTAAAGCCCACCGCCTAACGGTGGAAGTGCAAGAGATACGGCGGAAC TAGAGGAGG

TTAGAGGTGCATGGAACACACGGTGTAGGGGTGAAATCCGTTGATATCGTGGGGAACACC  
AAAGGCGAAGGCAGTGCAGTGGGACCTTCTGACTCTGAGATGCGAAAGCGTGGGGAGCA  
AAAAGGATTAGAAACCCGAGTAGTCC

>Otu15242

CCAGCCTACGGGACGCTGCAGTGGGGAATATTGGACAATGGGGGCAACCCTGATCCAGCA  
ATACCGCGTGTGTGAAGAAGGCCTTCGGGTGTAAAGGCACCTTTAGGTTGGGAAGAAGGTG  
ACTGGTTTAAAGAGATAGGTCATTTGACGGTACCAACAGAATAAGCACCGGCTAACTCTGT  
GCCAGCAGCCGCGGTAATACAGAGGGTGCAAGCGTTAATCGGAGTTACTGGGCGTAAAGG  
GCGCGTAGGCGGTTCGGATAAGTGAGATGTGAAAGCCCTGGGCTCAACCTAGGAACTGCAT  
CTTATACTGTAAGACTAGAGTATTGTAGAGGGTAGTGGAATTTCCGGTGTAGCGGTGAAA  
TGCGTAGAGATCGGAAGGAACACCAGTGGCGAGGGCGGCTACCTGGACAAATACTGACGC  
TGAGGCGCGAGAGCGTGGGGAGCAAACAGGATTAGAAACCCTAGTAGTCC

>Otu15269

CCAGCCTATGGGTGGCACCAGTTGGGAATTTTTCGCAATGGACGAAAGTCTGACGCAGCG  
ACGCCGCGTGAAGGATGAAGGCTTTAGGGTTGTAAACTTCTTTTGCTAGGGAGTAATTTG  
TGAACGTACCTAGCGAATAAGCACCGGCTAACTCCGTGCCAGCAGCCGCGGTAATACGGA  
GGGTGCAAACGTTGTCCGAATCACTGGGCGTAAAGAGCATGTAGGTGGCTTGATAAGTG  
GGCGATTAAAGACCGATGCTTAACATCGGAACGTGTGTCCATACTGTCTGGCTTGAGAAT  
GACAGGGGTAAAGCGGAACCTTTAGGTGTAGGAGTGAAATCCGTAGATATCTAAAGGAACAC  
CAATGGCGAAGGCAGCTTACTGGGTCTTTTCTGACACTGAGATGCGAAAGCGTGGGGAGC  
AAACAGGATTAGATACCCTCGTAGTCC

>Otu15271

CCAGCCTACGGGAGGCAGCAGTGGGGAATCTTTCGCAATGGACGAAAGTCTGACGCAGCC  
ACGCCGCGTGAAGGATGAAGGCTTCGGGTGTAAAGCTCTGTCTGTTGGGACGAAAATC  
CAGTGGGTAAATAGCCCATTGGACTGACGGTACCAAAAAGGAAGCACCGGCTAACTCCG  
TGCCAGCAGCCGCGGTAATACGGAGGGTGCAAGCGTTGCTCGGAATTATTGGGCGTAAAG  
GGTAGGTAGGTGGTCTCGTTTGTCTGGGGTGAAAGCCTTGAGCTTAACTCGAGAAGTGCC  
CCAGAAACGGCGAGACTAGAGTCCTGGAGAGGGTTCGTGGAATTCCCGGTGTAGCGGTGAA  
ATGCGTAGAGATCGGGAGGAACACCAGAGGGCGAAGGCGGCGACCTGGACAGGTACTGACA  
CTAAACTACGAAAGCGTGGGGAGCAAACAGGATTAGATACCCAGTAGTC

>Otu15295

CCAGCCTATGGGGCGCTGCAGTCGAGAATCATGGTCAATGCGCGAAAGCGTGAACCTGCG  
ATCCATCAGCGGTGATGAAGGAACTTCGTAAACCCGAGTAGGGCATTTCGATTCTGAGC  
GAGTGCCCGGTGAGCCGTGATTAATACCTGTGCCAGCATTTCGCGGTATACAGGAGCGGC  
AAGTGTGCTTGATTGAACTCGGTGTAAAGCGCGCGTAGACGGTAGATATGGACACGACT  
TTCATGTGAGATTACTTCTCTAAAGGGGTGATGACATCTACTTGGGAAGGCTAGAGGAG  
AGCGGAATGGCGAGTGTACCAATGAAATAGGTAGAGCCTCGTTGGAACACCAATGGCGAA  
GGCAGCTCTCTGGGGCCCTTCCGACGTTGAGGCGCGAAAGAGTAGGGAGCAAACGAGATT  
AGATACCCTTGTAGTCC

>Otu15297

CCAGCCTATGCAGCAGTCGAGAATTTTTCACAATGGGGGAAACCCTGATAGAGCGACGCC  
GCGTGGGGGATGAATGGCTTCGGCCCGTAAACCCCTGTCATTTGTGAACAAACGGTTACA  
GTGAACAACTGTGACCTTGATTGTAACGGAAGAGGAAGGGACGGCTAACTCTGTGCCAGC  
AGCCGCGGTAATACAGAGGTCCCAAGCGTTGTTTCGGATTCACTGGGCGTAAAGGGTTCGT  
AGGTGGTTCGGGTAAAGTCTGATGTGAAATCTCGGAGCTTAACTCCGAAACTGCATTGGATA  
CTATCCGGCTGGAGGGTTCGGAGGGGGGACTGGAATTCTCGGTGTAGCAGTGAAATGCGTA  
GATATCGAGAGGAACACCAGTGGCGAAGGCGAGTCCCTGGACGACTCCTGACACTGAGGC  
ACGAAAGCTAGGGGAGCAAACAGGATTAGATACCCGCGTAGTCC

>Otu15303

CCAGCCTATGGGTTGCACCAGCAAGGAATTTTGTGCAATGGGCGAAAGCCTGACACAGCG  
ACGCCGCGTGAGGGATGAAGGCTTTCGGGTGTAAACCTCTTTTCTCAGGGATGAATAAT  
GACAGTACCTGAGGAATAAGTCACGGCTAACTACGTGCCAGCAGCCGCGGTAATACGTAG  
GTGGCGAGCGTTATCCGGATTATTGGGCGTAAAGTGAGCGCAGACGGTTTTTCAAGTCA  
GATGTTAAATTTCTCGGCCTAACCGGGCAAGTGCAATTTGATACTGTTAACTAGAGGACA  
ACAGAGGGAGGTAGAATTCCCGGTGTAGTGGTGGAAATGCGTAGATATCGGGGGGAATACC  
AGTGGCGAAGGCGGCCTCCTGGGTTGTTTCTGACGTTTCATGCTCGAAGGTGTGGGGAGCA  
AACAGGATTAGAGACCCGGGTAGTCC

>Otu15305

CCAGCCTACGGGTCGCAGCAGACGAGAATATTCCGCAATGGGCGAAAGCCTGACGGAGCG  
ACGCCGCGTGATGGATGAAGTGCTTCGGTACGTAAACATCTTTTATCGGGGAAGAAGTTA  
TTGACGGTACCCGATGAATAAGGGGCTCCTAACTCTGTGCCAGCAGGAGCGGTAATACAG  
AGGCCCCGAGCATTACCCGGAATCACTGGGCGTAAAGGGTGTCCAGGCGGTTCGTATTAGT  
CGTTCGTAAAATCTGCGGGCTTAACCTGCAGCGCGAGCGAAACGGTACGACTAGAGGG  
CGCGAGAGATAGAGGGAACCTCACGGTGGAGGGGTGAAATCCGTTGATATCGTGGGGAACA  
CCAAAGGCGAAGGCACTCTATTGGCGCGTTCCTGACGCTCACACACGAAAGCCAGGGGAG  
CGAACGGGATTAGATACCCTAGTAGTCC

>Otu15307

CCAGCCTACGGGGGGCTCCAGTGGGGAATATTGGACAATGGGCGAAAGCCTGATCCAGCC  
ATGCCGCGTGAGTGATGAAGGCCTTCGGGTCGTAAAGCTCTGTTCAGAGGGAAAGAGGTGT  
GTGGTGGCTAATACCTGCTACACTTGACGGTACCCTCAAAGGAAGCACCGGCTAACTCCG  
TGCCAGCAGCCGCGGTAATACGGAGGGTGCAGAGCGTTGTTTCGGAATTATTGGGCGTAAAG  
CGCGTGTAGGCGGTTTTTTTAAGTCTGATGTGAAAGCCCTGGGCTCAACCTGGGAAGTGCA  
TTGGAAGTGGGAGACTTGAATACGGGAGAGGGTAGTGGAATTCCTGGTGTAGGAGTGAA  
ATCCGTAGATATCAGGAGGAACACCGGTGGCGAAGGCGGCTACCTGGACCGATATTGACG  
CTGAGGCGCGAAAGCGTGGGGAGCAAACAGGATTAGAAACCCCTGTAGTCC

>Otu15311

CCAGCCTACGGGGTGCAGCAGTGAGGAATCTTCCGCAATGGGCGAAGGCCTGACGGAGCG  
ACACCGCGTGAGGATGAAACCCCTCTGGGCGTAAACTTCTGTTCTGAGGGACGAAATT  
TTTGACGGTACCTCAGGAGAAAGCACCGGCTAATTCTGTGCCAGCAGCCGCGGTAAGACA  
GAAGGTGCAAGCGTTACTCGGAATTACTGGGCGTAAAGCGTCCGTAGGTGATCCTGTTTG  
TCCGGTGTCAAAGCGCGACGCTCAACGTTGCGTTGGCGCTGGAACGGCAGGAATTGAGT  
CATTCAGAGGCATCTGGAATATCGTGTGTAGGGGTAAATCCGTTGATCCACGATAGAAC  
GCCGAAAGCGAAGGCAGGATGCTAGGAATGTACTGACACTCAGGGACGAAAGCGTGGGGA  
GCAAACCGGATTAGAAACCCGAGTAGTCC

>Otu15312

CCAGCCTACGGGTGGCACCAGTTAGGGAACTTTTCCAATGCGCGCAAGCGTGAGAAAGCG  
AGTCAGAGTGATTTAGATATAATTTCTAAATCTTTTATTTGTTGTAAAAAGACAGATGAA  
TAAGGAGTGGGCAAGATCGGTGCCAGCCGCCGCGGTAATCCCGACGCTCCAAGTCGCAGC  
CACAATTATTGGGTCTAAAACATTTCGTAGCTTGTTCGTTAAGTTCTTTGTGAAATCTTAT  
ATCTCAAGTATAAGGCGCGCAAAGAATACTGGCAAACCTTGGGACCGGAAGAAGCAAGAAG  
TACAATTAAGGTAGTAGTAAAATACGTTAATCTTAATCGGACTAACAACAGCGAAGGCAT  
CCTGCTAGTACGGATCTGACAGTGAGGAATGAAGGCTAGGGTCGCGAAAGGGATTAGGTA  
CCCGGGTAGTCC

>Otu15351

CCAGCCTACGGGGGGCTGCAGTGGGGAATTTTCCGCAATGGGCGCAAGCCTGACGGAGCA  
ATACCGCGTGAGGGAGGACGGCTTTTGGGTGTAAACCTCTTTTCTCTGGGAAGAAGATC  
TGACGGTACCAGAGGAATCAGCATCGGCTAACTCCGTGCCAGCAGCCGCGGTAATACGGA  
GGATGCAAGCGTTATCCGGAATTATTGGGCGTAGAGGGTCCGCAGGTGGTTGTTCAAGTC  
TGCTGTTAAAGCGTGGAGCTTAACTCCATATCGGCAGTGGAAGTGAATAACTAGAGTTC  
GGTAGGGGTGCGGGGAATTCCCAGTGTAGCGGTGAAATGCGTAGATATTGGGAAGAACAC  
CGGCGGCGAAAGCGCGCGACTGGGCTGAGACTGACACTGAGGGACGAAAGCTAGGGGAGC  
GAAAGGGATTAGAAACCCCCGTAGTCC

>Otu15352

CCGCCTTGGGGTGCTCCAGTGGGGAATTTTGCACAATGGGGGAACCCCTGATGCAGCAAC  
GCCGCGTGAGGATGAAGTCCCTTGGGATGTAAACTCCTTTCGACCGGGACGATAATGAC  
GGTACCGGTGGAAGAAGCCCCGGCTAACTCTGTGCCAGCAGCCGCGGTAATACGTAGGGG  
GCAAGCGTTGTTTCGGAATCACTGGGCGTAAAGGGAGCGTAGGCGGAGGAATAAGTTAGGA  
GTTTAATGTACGGGCTTAACCCGTAATCTGCTCCTAATACTGTTCTTCTTGAGTATGGGA  
GAGGGAGATGGAATTCAGGTGTAGCGGTGGAATGCGTAGATATCTGGAAGAACACCAGC  
TGCGAAGGCGGTCTCCTGGCCCAATACTGACGCTGAGGCTCGAAAGCTAGGGGAGCAAAC  
AGGATTAGATACCCGAGTAGTCC

>Otu15360

CCAGCCTATGGGGCGCTGCAGGGAATATTGGGCAATGGGCGAAAGCCTGACCCAGCAACG  
CCGCGTGTGTGATGAAGGCCTTCGGGTCGTAAACACTTTTCTGAGGGATGAGCAAGGAC  
AGTACCTCAGGAATAAGTCTCGGCTAACTACGTGCCAGCAGCCGCGGTAAACGTAGGAG  
ACGAGCGTTATCCGGATTTACTGGGCGTAAAGCGCATGCAGGTGGTTTGGTAAGTTGGAT

GTGAAAGCTCCCGGCTCAACTGGGAGAGGTCGTTCAATACTACCAGACTTGAGAGCAGTA  
GAGGAAGGTGGAATTCCTGGTGTAGTGGTGAAATGCGTAGATATCGGGAGGAACACCAGT  
GGCGAAAGCGGCCTTCTGGACTGTTTTCTGACACTCATATGCGAAAGCTAGGGTAGCAAAC  
GGGATTAGAAACCCGGGTAGTCC

>Otu15363

CCAGCCTATGGGTTCGCTCCAGTGGGGAATTTTGCGCAATGGGCGAAAGCCTGACGCAGCG  
ACGCCGCGTGGGTGATGAAGGCCTTCGGGTGTAAAGCCCTGTGGGGAGGGAAGAATAAG  
GGGCAGTGAATAGCTGCTCTGATGACGGTACCTCCTTAGCAAGCACCGGCTAACTCTGTG  
CCAGCAGCCGCGGTAAGACAGAGGGTGCAAACGTTGTTTCGGAATTACTGGGCGTAAAGCG  
CGTGTAGGCGGCTCAACAAGTCAGGTGTGAAAGCCCTTGGCTCAACCGAGGAAGTGCCT  
TGAAACTGGTGAGCTTGAGTACTGGAGAGGATGGTGGAATTCTCGGTGTAGAGGTGAAAT  
TCGTAGATATCGAGAGGAACACCGGTGGCGAAGGCGGCCATCTGGACAGAGACTGACGCT  
GAGACGCGAAAGCGTGGGTAGCAAACAGGATTAGAAACCCCCGTAGTCC

>Otu15368

CCAGCCTACGGGTTCGAGCAGTGAAGAATCTTGGGCAATGGAGTAACCTCTGACCCAGTG  
AGAATACATGCATGATGAAGGCGCATAGTTTTCTGTAAAGTGCTTTTCGGTGATGAAGAAG  
ATGTCCGTAATCACAGTAAGAAGCGCCGGCCAACCTCCGTGCCAGCAGCCGCGGTAAGACG  
GAGGGCGCGGGCGTTATTTCGTTATGATTGGGTGTAAAGGGTACGTAGGCTGCTGTTGATA  
ATTTTTGGCTTAAAACGCGGAGTGTTCTACGCGACAGCCTTTTATAGATACAGCTAGTG  
TTGGAGATAGGTTAGGGCAATTTCTTATGTAGGGGTAAAATCCTACCATATAAGAACGAA  
CACCAGCTGGCGAAGGCGCCTTTCTAGTTCCAACAGACGCTAAGGTACGGAAGCCTAGGG  
AGCAAACAGAATTAGAAACCCCTAGTAGTCC

>Otu15371

CCAGCCTACGGGGGGCAGCAGTTGGGAATCTTGGACAATGGGCGAAAGCCTGATCCAGCC  
ATGCCGCGTGAGTGATGAAGGCCTTAGGGTTGTAAAGCTCTTTTACCCGGGAAGATAATG  
ACGGTACCGGGGAGAATAAGCTCCGGCTAACTTCGTGCCAGCAGCCGCGGTAATACGAAGG  
GGGCTAGCGTTGTTTCGGAATTACTGGGCGTAAAGCGTGCGCAGGCGGCCATACAAGTCAG  
GGGTGAAAGCCCAGAGCTCAACTCTGGAATTGCCTTTGAAACTGTTTGGCTCGAGTGCGG  
GAGAGGTGAGTGGAATTCACAGTGTAGAGGTGAAATTCGTAGATATTTCGAAGAACACCA  
GTGGCGAAGGCGGCTCACTGGCCCCGATACTGACGCTGAGGCACGAAAGCGTGGGGAGCAA  
ACAGGATTAGATACCCGCGTAGTCC

>Otu15374

CCAGCCTATGGGGGGCAGCAGTCGAGAATTTTTTCACAATGGGGGAAACCCTGATGGAGCG  
ACGCCGCGTGGGGGATGAATGGCTTCGGCCCGTAAACCCCTGTCATTTGCGAACAACCT  
TGCTCAATAACACTGGGCGAGCTGATTGTAGCGGAAGAGGAGGGGACGGCTAACTCTGTG  
CCAGCAGCCGCGGTAATACAGAGGTCCCAAGCGTTGTTTCGGAATCACTGGGCGTAAAGGG  
TGCGTAGGTGGTTCGGGTAAGTCTGATGTGAAAGCTCGAAGCTTAACCTCGAAATGGCATT  
GGATACTATCCGGCTTGAGGATCGGAGGGGGGACTGGAATTCTCGGTGTAGCAGTGAAAT  
GCGTAGATATCGAGAGGAACACCAGTGGCGAAGGCGAGTCCCTGGACGACTCCTGACACT  
GAGGCACGAAAGCTAGGGGAGCAAACAGGATTAGAAACCCCTGTAGTCC

>Otu15380

CCAGCCTATGGGTGGCTCCAGGCGCGAAACCTTCACAATGCACGAAAGTGTGATGGGGGG  
ACTCAGAGTGCAAATACTTATGTATTTGCTTTTGCTGACTCGAAATTGGTTCGGAATAA  
GTGGTGGGCAAGACTGGTGCCAGCCGCCGCGGTAACCCAGCGCCACTAGTGGGAATCGG  
TATTATTGGGTCTAAAGCGTCCGTAGCAGGTCTATTAAATTGCTTGTGAAATCGCGTCAC  
TCAATGATGCGGATTGCAGGTAAGACTGGTAGACTAGAGACTGGGAGACGTTGGAGGTAT  
TCAAAGGGGAGCGGTAAAATGCGAGAATCCTTTGAAGACCACCTGTTGCGAAGGCGTCCA  
ACAATAACAGGTCTGACTGTGAGGGTCGAAAGCTAGGGGAGCGAACCGGATTAGAAACCC  
TTGTAGTCC

>Otu15381

CCAGCCTACGGGGCGCTGCAGTCGGGAATATTGCACAATGGGCGAAAGCCTGATGCAGCA  
ACGCCGCGTGCGGATGAAGGCCTTCGGGTGCTAAAGCGCTTTTTGGGGAGATGAGAAAG  
GACAGTATCCCCAGAATAAGGATCGGCTAACTACGTGCCAGCAGCCGCGGTAACACGTAG  
GATCCAAGCGTTATCCGAATTTACTGGGCGTAAAGCGCGTGACAGGCGGTTTGGTAAGTTG  
GATGTGAAAGCTCCCGGCTCAACTGGGAGATGCCGTTCAAACTACCAGACTAGAGGGCG  
GTAGAGGGAGGTGGAATTCCTGGTGTAGTGGTGAAATGCGTAGATATCGGGAGGAACACC  
AGTGGCGAAAGCGACCTCCTGGACCGTACCTGACGCTCGGACGCGAAAGCTAGGGGAGCG  
AACGGGATTAGATACCCTAGTAGTCC

>Otu15382

CCAGCCTACGGGTCGCTCCAGTTTGGAAATATTCCGCAATGGGCGAAAGCCTGACGGAGCG  
ACACCGCGTGAAGGATGAAGGTCTTCGGATTGTAAACTTCTTTAGACCTAGATGAAGGCT  
GCGGGGTGAATAATCCCGTAGTTTGACAGTATAGGTAAAATAAGCCACGGCTAACTCTGT  
GCCAGCAGCCGCGTAATACAGAGGTGGCAAACGTTGTCCGGATTTATTGGGTGTAAAGG  
GCATGTAGGTGGTCTTGTAAGTCAAAGGTGAAATGGCCCGGCTTAACCAGGTCATTGCCT  
TTGAAACTGCAGGGCTTGGGTACGGAAGAGGAGAGCGGAATTTCCAGTGTAGCGGTGAAA  
TGCGTAGATATTGGGAGGAACACCGGTGGCGAAGGCGGCTCTCTGGTCCGAAACTGACAC  
TGAGATGCGAAAGCCAGGGGAGCAAACGGGATTAGATAACCTGGTAGTCC

>Otu15416

CCAGCCTACGGGAGGCTGCAGTCGAGAATTTTTCTCAATGGGCGAAAGCCTGAAGGAGCG  
ACGCCGCGTGGGGGATGAATGGCTTCGGCCCGTAAACCCCTGTCATTTCGGGATCAATGCG  
TCTGGGTGAACATCCAGACGTTGATGGTACCGGAAGAGGAAGGGACGGCTAACTCTGTG  
CCAGCAGCCGCGTAATACAGAGGTCCCAAGCGTTGTTTCGGATTTACTGGGCGTAAAGGG  
TGCGTAGGTGGTTGGATAAGTTTGATGTGAAATCTCCGGGCTTAACCCGGAATAATGCATT  
GAATACTATCTAGCTTGAGGGTTGGAGGGGGGACTGGAATTCTTGGTGTAGCGGTGAAAT  
GCGTAGATATCGAGAGGAACACCAGTGGCGAAGGCGAGTCCCTGGACAACCTCTGACACT  
AAGGCACGAAAGCTAGGGGAGCAAACAGGATTAGAGACCCCGGTAGTCC

>Otu15425

CCAGCCTATGGGTTGCTGCAGTGGGGAATTTTTCGCAATGGACGAAAGTCTGACGCAGCA  
ACGCCGCGTGGAGGATGAAGGTCTTCGGATTGTAAACTTCTGTTAATCGGAAAGAAAGAA  
TAAAAATTAATACCTTATATTTATGACGTTACCGGTTTCAGAAAGCCCCGGCTAACTTCGT  
GCCAGCAGCCGCGTAATACGAAGGGGGCAAGCGTTATTCGGAATGATTGGGCGTAAAGG  
GCGCGTAGGCGGTGCAATAAGTTTGTTGTTAATTTCCCTGGCCTAACTGGGAACATGCAA  
TAAAGACTGTTGTGCTAGAGTTAGATAGAGAGAAGTGGAAATTGTTCGGAGTAGCGGTAAAA  
TGCGTAGATCTCGACAGGAACGCCAATGGCGAAGGCAACTTCTTGGAGCTATACTGACGC  
TGAGGCGCGAAGGCATGGGGAGCAAACAGGATTAGAGACCCCGGTAGTCC

>Otu15454

CCAGCCTACGGGGTGCTGCAGTGGGGAATATTGGACAATGGGGGAAACCCTGATCCAGCG  
ACGCCGCGTGTGTGAAGAAGGCCTGCGGGTTGTAAAGCACTTTTAGTGGGGATGAAAAGT  
CCAGGGGCTAATACCCTTGATCTTGACCTAACCCAAAGAAAAAGCACCGGCTAACTCTGT  
GCCAGCAGCCGCGTAATACAGAGGGTTCGAGCGTTAATCGGAATTACTGGGCGTAAAGC  
GTGCGTAGACGTTCCGTAAGTCGGATGTGAAATCCCCGGGCTCAACCTGGGAATTGCAT  
TCGAGACTGCGAGGCTAGGGTTCGGAAGAGGGAAGCGGAATTTCCGGTGTAGCGGTGAAA  
TGCGTAGATATCGGAAGGAACACCTGTGGCGAAAGCGGCGCACTGGACCATAACTGACGC  
TGAGGCGCGAAAGCTAGGGGAGCAAACAGGATTAGAAACCCCGGTAGTCC

>Otu15506

CCAGCCTACGGGACGCAGCAGTGGGGAATCTTGCGCAATGGGCGAAAGCCTGACGCAGCG  
ACGCCGCGTGTGCGATGAAGGTCTTCGGATCGTAAAGCACTGTTCGCGAGGGAAGAAACCT  
GACGGTACCTCAAGAGGAAGCACCGGCTAACTCTGTGCCAGCAGCCGCGTAATACAGAG  
GGTTCGAGCGTTGTTTCGGAATTATTGGGCGTAAAGCGCTGGTAGGTGGCTTTTCAAGTCA  
CGTGTGAAATCTCCGGGCTCAACCGGGGAAAGTTCGCGGTGAAACTGACGAGCTTGAGTGCC  
GGAGAGGGTTCGCGAATTCCCGGTGTAGAGGTGAAATTCGTAGATATCGGGAGGAACACC  
AGAGGCGAAGGCGGCGACCTGGAAGGTGACTGACACTGATGCACGAAAGCTAGGGGAGCA  
AACAGGATTAGAAACCCTCGTAGTCC

>Otu15514

CCAGCCTACGGGTTCGAGCAGTGAAGGAATATTGGTCAATGGGCGCAAGCCTGACCCAGCG  
ACGCCGCGTGCAGGATGAAGCCCTTCGGGTGTAAACCGCTGTCAGGGATAGGGAAGCGA  
CCGCCGTGAATAACGGCGGAAGTTGACCCAACCCAAAGGAAGCCACGGCTAACTCCGTGC  
CAGCAGCCGCGGTAAGACGGAGGTGGCGAGCGTTACTCGGATTTACTGGGCTTAGAGCGG  
GTGACAGGCGGCTGCGCAAGTCCGGAGTGAAAGCCCTCGGCTCAACCGAGGAATTGCTTCG  
GATACTGCGCGGCTTGAGGCAGGTAGGGGCCAGTGGAACGTTTGGTGTAGCGGTGAAATG  
CGTAGATATCAAACGGAACGCCGGTGGTGAAGACGGCTAGCTGGACCTGTCCTGACGCTC  
AGACCCGAAAGCGTGGGGAGTGAACCGGATTAGATAACCCGTGTAGTCC

>Otu15531

CCAGCCTACGGGGTGCAACAGTGAAGGAATCTTGACACAATGGGCGCAAGCCTGATGCAGCA  
ACGCCGCGTGAAGGAGGAAGGCCTTCGGGTGTAAACCTCTTTGGGTAGGGACGATGATG  
ACGGTACCTACTTGATTAGTCCCGGCCAACTACGTGCCAGCAGCCGCGTAATACGTAGG

GGGCAAGCGTTGTCCGGATTTATTGGGCGTAAAGAGCTCGTAGGCGGCTTGGTCAGTCGG  
GTGTGAAAACCTCTGGGCTCAACCCAGAGACGCCACTCGAAACTGCCATGGCTAGAGATTG  
GTAGGGGACCACGGAATTCCTGGTGTAGCGGTGAAATGCGCAGATATCAGGAGGAACACC  
ATAAGCGAAAGCGGTGGTCTGGGCCAATTCTGACGCTGAGGAGCGAAAGCGTGGGTAGCA  
AACCGGATTAGATAACCCCGTAGTCC

>Otu15547

CCAGCCTATGGGTTGCAGCAGTAAGGAATATTGGACAATGGTGGCAACACTGATCCAGCC  
ATGCCGCGTGCAGGATGAAGGCGCTACGCGTTGTAAACTGCTCTTGTACGGGAGAAAACC  
TATCTACGTGTAGATAGCTGATAGTACCGTAAGAATAAGCATCGGCTAACTTCGTGCCAG  
CAGCCGCGGTAATACGAAGGATGCAAGCGTTATCCGGATTTATTGGGTTTAAAGGGTACG  
TGGGCGGACTTATAAGTCAGTGGTGAATCTCGTTGCTTAACAACGAACGTGCCATTGAT  
ACTGTAGGTCTTGAGTACAGATGCCGTTTGCGGAATGTGTCATGTAGCGGTGAAATGCGT  
AGATATCAGGAGGAACACCGGTGGTGTAGACGGCTCTCTGGACCGTAACTGACGCTGAGA  
CACGAAAGCGTGGGTAGCAAACAGGATTAGAGACCCCTGTAGTCC

>Otu15553

CCAGCCTACGGGGGGGCTGCAGCGGGGAATATTGGACAATGGGGGAAACCCTGATCCAGCG  
ACGCCGCGTGTGTGAAGAAGGCCTGCGGGTTGTAAAGCACTTTTAGTGGGGATGAAAAGT  
TCAGGGCTAATACCTCTGGATCTTGACCTAACCCACAGAAAAAGCACCGGCTAACTCTGT  
GCCAGCAGCCGCGGTAATACAGAGGGTGCAAGCGTTAATCGGAATTACTGGGCGTAAAGC  
GTGCGTAGGCGGTTTCATAAGTCGGGTGTGAAAGCCCCGGGCTCAACCTGGGAATTGCAT  
TCGAGACTGCGAAGCTAGGGTGCGGAAGAGGGAAGCGGAATTTCCGGTGTAGCGGTGAAA  
TGCGTAGATATCGGGAGGAACATCAGTGGCGAAGGCGACCGCCTGGCCCAACACTGACGC  
TGAGGTGCGAAAGCGTGGGTAGCAAACAGGATTAGAGACCCCGGTAGTCC

>Otu15566

CCAGCCTATGGGGTGCAGCAGTGGGGAATTTTGCGCAATGGGCGAAAGCCTGACGCAGCA  
ACGCCGCGTGGGTGATGAAGGTCTTCGGACTGTAAACCCTGTGCTCAGGGACGAAGGTG  
CTTACGTTAACAGCGTGAGTGCTTGACGGTACCTGGAGAGGAAGCCCCGGCTAACTCTGT  
GCCAGCAGCCGCGGTAATACAGAGGGGGCAAGCGTTATTTCGGAATTACTGGGCGTAAAGG  
GCATGTAGGCGGCTTTGTAAAGCCCGGCGTGGAAGCCCATGGCTCAACCATGGGATTGCGT  
TGGAACCTGCGAGGCTTGAATCATGGAGAGGGAGCTAGAATTCCTGGTGTAGGGGTGAAA  
TCTGTAGAGATCAGGAAGAATACCAGTGGCGAAGGCGAGCTCCTGGCCAATGATTGACGC  
TGAGGTGCGAAAGTGTGGGGATCAAACAGGATTAGATAACCCGCGTAGTCC

>Otu15579

CCAGCCTACGGGGGGCACCAGTAGGGAATTTTCCACAATGGGCGAAAGCCTGATGGAGCG  
ACGCCGCGTGCGGGATGAAGGTCTTCGGATTGTAAACCGCTTTGGAGTGGGAAGAACTGT  
TTTGGTGTAAACAGCGCCAGAGCGTGACGGTACCACTAGAACAAGACACGGCTAACTTCG  
TGCCAGCAGCCGCGGTAATACGAAGGTGTCAAACGTTGTCCGGAATTACTGGGCGTAAAG  
GGCGCGTAGGCGGCTTGATAAGTCGGGTGTGAAATCTCTGGGCTCAACCCAGGAATTGCA  
CCCGATACTGTTGAGCTTGAGTTCGGTAGAGGAGGGCGGAATTCCAGGTGTAGCGGTGAA  
ATGCGTAGATATCTGGAGGAACACCCGTGGCGAAGGCGGCTCTCTGGTCCGATACTGACG  
CTGAGGTGCGAAAGCTAGGGTAGCAGACAGGATTAGAAACCCGAGTAGTCC

>Otu15582

CCAGCCTATGGGGGGGCTCCAGTCGAGAATCTTCCGCAATGGGCGAAAGCCTGACGGAGCG  
ACGTTACGTGAATGATGAAGCCCTTCGGGGTGTAAAGTTCTTTTATGTATGAGGAAGGCG  
CAAGCCAGACAGTAATACATGAATAAGAGGATCCTAATTCTGTGCCAGCAGGAGCGGTAA  
TACAGAATCCCCAAGCGTTACCCGATTTATTGGGCGTAAAGGGTCCGTAGGTGGTAAAG  
TAAGTTTCGAGTTAAACCTCATCGGCTTAACCTTTGAGCTGCTCGAAATACTGCTTAACT  
AGAGGGCGTTAGGGGTTAGCGGAACCGACGGAGTAGGGGTGAAATCCGTTGATATCGTCG  
GGAACACCAAAAGCGAAGGCAGCTAACTAGGACGACCCCTGACACTGAGGGACGAAAGCGT  
GGGGAGCAAAAAGGATTAGAAACCCAGTAGTCC

>Otu15595

CCAGCCTACGGGTGGCTGCAGTGGGGAATATTGGACAATGGGGGCAACCCTGATCCAGCC  
ATGCCGCGTGAGTGATGAAGGCCTTAGGGCTGTAAAGCTCTTTCACCCACGACGATGATG  
ACGGTAGTGGGAGAAGAAGCCCCGGCTAACTTCGTGCCAGCAGCCGCGGTAATACGAAGG  
GGGCTAGCGTTGTTCCGAATTACTGGGCGTAAAGCGCACGCAGGCGGTGACCACAGTCAG  
AAGTGAAAGCCCTGGGCTCAACCCGGGAATTGCTTTTGATACTGGGTGCTAGAAATCACG  
GAGAGGGTAGTGGAATTCAGAGTGTAGAGGTGAAATTCGTAGATATTCGGAAGAACACCA  
GTGGCGAAGGCGACTACCTGGCCGTGATTGACGCTCATGTGCGAAAGCGTGGGGAGCAA



ACAGGATTAGATACCCTAGTAGTCC

>Otu15597

CCAGCCTATGGGAGGCACCAGTCGAGAATTTTTCACAATGGGCGCAAGCCTGATGGAGCG  
ACGCCGCGTGGGGGATGAATGGCTTCGGCCCGTAAACCCCTGTCATTTCGCGATCAACCCCT  
TGCTATTTAAAGATGGCAAGCTGATGGTAGCGGGAGAGGAAGGGACGGCTAACTCTGTG  
CCAGCAGCCGCGGTAATACAGAGGTCCCAAGCGTTGTTTCGGATTCACTGGGCGTAAAGGG  
TGCGTAGGTGGTTGGGTAAGTTTGATGTGAAATCTCCGGGCTTAACCCGGAATGCATT  
GAATACTATTCAGCTTGAGGATTGGAGGGGGGACTGGAATTCTCGGTGTAGCAGTGAAAT  
GCGTAGATATCGAGAGGAACACCAGTGGCGAAGGCGAGTCCCTAGACAATTCCTGACACT  
GAGGCACGAAAGCCAGGGGAGCAAACGGGATTAGATACCCCCGTAGTCC

>Otu15602

CCAGCCTACGGGGGGCAGCAGTAGGGAATATTGGGCAATGGGCGAAAGCCTGACCCAGCA  
ACGCCGCGTGCACGATGAAGGTCTTCGGATCGTAAAGTGCTTTTCTGAGAGATGAGAAAG  
GACAGTATCTCAGGAATAAGTCTCGGCTAACTACGTGCCAGCAGCCGCGGTAACACGTAG  
GAGGCAAGCGTTATCCGGATTTACTGGGCGTAAAGCGCATGCAGGTGGTTCGGTAAGTTG  
GATGTGAAATCTCCTGGCTCAACTGGGAGAGGTCTGTTCAAGACTGTCCGACTAGAGGGCG  
GTAGAGGGAGGTGGAATTCCCGGTGTAGTGGTGAAATGCGTAGATATCGGGAGGAACACC  
TGTGGCGAAAGCGGCCTCCTGGGCCGCACCTGACGCTCAGACACGAAAGCTAGGGGAGCA  
AACGGGATTAGATACCCTAGTAGTCC

>Otu15607

CCAGCCTACGGGTTGCAGCAGTCGAGAATCTTCCGCAATGGGCGAAAGCCTGACGGAGCG  
ACACCGCGTGCAGGATGAAGGCCCTTCGGGTGTAAACTGCTGTCACGCTTTAGGAATGGC  
CTGATGTTAACAGCATCAGGAGTGACCAAGGCGAAAGGAAGCACC GGCTAACTCTGTGCC  
AGCAGCCGCGGTAAGACAGAGGGTGCAAACGTTGTTCCGGAATTACTGGGCATAAAGCGCA  
CGTAGGTGGTCCACTAAGTCGAGTGTGAAATCCCCCGGCTCAACCGGGGAATGGCGCTCG  
ATACTGGTGGGCTAGAGGTCTGGTAGGGGTGAGCGGAACTCCAGGTGGAGCGGTGAAATGC  
GTAGATATCTGGAGGAACACCGGTGGCGAAAGCGGCTCACTGGATCGAATCTGACACTGA  
GGTGCGAAAGCTAGGGTAGCAAACGGGATTAGATACCCGCGTAGTCC

>Otu15608

CCAGCCTATGGGGTGCACCAGTGGGGAATCTTGACACAATGGGGAAACCCCTGACGTAGCGA  
CACCGCGTGAGCGAAGAAGCCCTGTGGGGTGTAAAGCTCTGTGAGCTGGAACGAAACAAA  
TGACGGTACCAGCAGAGGAAGCATCGGCTAACTACGTGCCAGCAGCCGCGGTAAGACGTA  
GGATGCAAGCGTTGTCCGGATTTATTGGGCGTAAAGAGTTCGTAGGCGGTTTGTAAAGTC  
TGGTGTTAAAGATCGGGGCTCAACCTCGGGACTGCATCGGATACTGGCAGACTGGAGTAT  
GGTAGAGGTGAGTGAATTCCCAGTGTAGCGGTGAAATGCGTAGATATTGGGAAGAACAC  
CGGTGGCGTAAGCGACTGACTGGACCATAACTGACGCTGAGGAACGAAAGCCAGGGGAGC  
GAATGGGATTAGATACCCCAGTAGTCC

>Otu15610

CCAGCCTATGGGTCGCAGCAGCCGAGAATATTGCACAATGGGCGAAAGCCTGATCGAGCG  
ATACCGCGTGGTGGATGAAGCGATTTCGTGCGGTAAACATCTTTTATGAGGGAGGAAGTTA  
TTGACGTTACCTCATGAATAAGGGGCTCCCAACTCTGTGCCAGCAGGAGCGGTAATACAG  
AGGCCCAAGCGTTACCCGGAATTACTGGGCGTAAAGAGTGCGTAGGTGGTCATATTAGT  
CGTCCGTTAAATACCCGGGCTCAACCCGGGGAATGCGGGCGAAACGGTATGACTCGAGGG  
CGTGAGAGGTGCATAGAACTCTAGGTGTAGGGGTGAAATCCGTTGATATCTAGGGGAATA  
CCGAAAGCGAAGGCAGTGCCTGGCGCGTTCTTGACACTCAAGCACGAAAGCGTGGGTAG  
CGAACGGGATTAGATACCCCCGTAGTCC

>Otu15617

CCAGCCTATGGGGCGCAGCAGTGGGGAATATTGGACAATGGGCGAAAGCCTGATCCAGCA  
ATGCCGCGTGTGTGAAGAAGGTCTTCGGATTGTAAAGCACTTTCGACGGGGACGATGATG  
ACGGTACCCGTAGAAGAAGCCCCGGCTAACTTCGTGCCAGCAGCCGCGGTAATACGAAGG  
GGGCTAGCGTTGCTCGGAATCACTGGGCGTAAAGCGCACGTAGGCGGACTCTTAAGTCGG  
TGGTGAAATCCTGGAGCTCAACTCCAGAACTGCCTTCGATACTGAGAGTCTCGAGTCCGG  
GAGAGGTGAGTGGAATGCGAGTGTAGAGGTGAAATTCGTAGATATTTCGCAAGAACACCA  
GTGGCGAAGGCGGCTCACTGGCCCGGTACTGACGCTGAGGTGCGAAAGCGTGGGGAGCAA  
ACAGGATTAGATACCCTGTAGTCC

>Otu15623

CCAGCCTATGGGATGCACCAGTGGGGAATATTGGACAATGGGCGAAAGCCTGATCCAGCA  
ATGCCGCGTGTGTGAAGAAGGTCTTCGGATTGTAAAGCACTTTCGGCGGGGACGATGATG

ACGGTACCCGCAGAAGAAGCCCCGGCTAACTTCGTGCCAGCAGCCGCGGTAAATACGAAGG  
GGGCTAGCGTTGCTCGGAATGACTGGGCGTAAAGGGCGCGTAGGCTGTTCGTACAGTCAG  
ATGTGAAATTCCCGGGCTTAACCTGGGGGCTGCATTTGAGACGTACGGGCTTGAGTGTGA  
AAGAGGGTCGTGGAATTCAGTGTAGAGGTGAAATTCGTAGATATTGGGAAGAACACCA  
GTGGCGAAGGCGGCGACCTGGTTCATAACTGACGCTGATGCACGAAAGCTAGGGGAGCAA  
ACAGGATTAGAGACCCCTGTAGTCC

>Otu15638

CCAGCCTACGGGATGCTCCAGGTGCGAAAAATTTTCCAATGCACGCAAGTGTGAGAGAGGA  
ATCTTGAGTGTTTTTGTTAATACAAAACTTTTGCCTACTGTAAAAAGGTACGAGAATAA  
GGGCTGGGCAAGATCGGTGCCAGCAGCCGCGGTAATCCCGACGGCCCAAGTGGGACTCAC  
AATTATTGGGTCTAAAACATTCGTAGCCGGCTTTTCAAGTTTTGTGTTAAATTGCAAGGC  
TTAACTTTGCAGCCGCACAAAATACTGAATAGCTAGGGACTGGGGGACGTAATGAGTACA  
TCTAGGGGAGTAGTAAAATATGTTAATCCTAGCTGGACTAACAATGGCGAAGGCACGTTA  
CGAAAACAGATCCGACGGTGAGGAATGAAGGCCAGGGGCGCAAATTGGATTAGATACCC  
CGTAGTCC

>Otu15642

CCAGCCTACGGGGTGCTGCAGTCGGGGAACTTTTCCAATGCGCGCAAGCGTGAGAAAGTA  
AGCCGGAGTGATACAGATATAATTTCTGTATCTTTTGTTTATTGCAAAAAGATAGACGAA  
TAGGGAGTGGGCAAGATCGGTGCCAGCCGCGCGGTAATCCCGACGCTCCAAGTCGCAGC  
CACAATTATTGGGTCTAAAACATTCGTAGCTCGTTTTCTAAGTTCTTTGTGAAATTCTAA  
ATCTTAAGTTTAGAGCGCGCAAGAATACTGGAAAACCTTGAGACCGGAGGAAGTAAGGAG  
TACGGCCGAGGTAGTAGTAAAATATGTTAATCTTGTTGGACTAACAACAGCGAGGGCAC  
CTTACTAATACGGATCTGACAGTGAGGAATGAAGGCTAGGGTCGCGAAACGGATTAGATA  
CCCGCGTAGTCC

>Otu15645

CCCAGCCTATGGGTTGCAGCAGTGGGGAATATTGGGCAATGGGCGAAAGCCTGACCCAGC  
GACGTCGTGTGGGCGATGAAGGCCTTCGGGTCGTAAAGCCCTGTCAGATGGGAAGAAACC  
TCCCTGAGAGGGGAGCTGACGGTACCATCGAAGGAAGCACCGGCTAACTCCGTGCCAGCA  
GCCGCGGTAATACGGAGGGTGCAAGCGTTGTTTCGGAATCACTGGGCGTAAAGGGCGCGTA  
GGCGGTTTTGGGAAGTCCGATGTGAAAGCCCCGGGGCTTAACCTCCGGAAGGGCATTGGAAAC  
TCCCAGACTTGAGTTCGGGAGAGGAAGGCAGAATTCCCGGTGTAGGGTTGAAATCCGTAG  
ATATCGGGAGGAAAACCGGTGGCGAAGGCGGCCTTCTGGAACGAAACTGACGCTGAGGCG  
CGAAAGCGTGGGGAGCAAACAGGATTAGATACCCGCGTAGTCC

>Otu15648

CCAGCCTATGGGTCGCAGCAGTAGGGAATATTGGGAATGGGCGCAAGCCTGACCCAGCAA  
CGCCGCGTGAGTGATGAAGGCCTTCGGGTGTAAAACCTTTTTACCGGGAAGAGGAAGG  
ACGGTACCGGTGGAATAAGTCTCGGCTAACTACGTGCCAGCAGCCGCGGTAACACGTAGG  
AGACAAGCGTTATCCGGATTTACTGGGTGTAAAGCGCGTGCAGGCGGTTAGGTAAGTTGG  
ATGTGAAAGCTCCTGGCTCAACTGGGAGAGGTGCTTCAATACTACCGGACTTGAGAGCAG  
TAGAGGAAGGTGGAATTCCCGGTGTAGTGGTGAAATGCGTAGATATCGGGAGGAACACCA  
GTGGCGAAAGCGGCCTTCTGGACTGTTTCTGACACTCATATGCGAAAGCTAGGGTAGCAA  
ACGGGATTAGAAACCCCGGTAGTCC

>Otu15650

CCAGCCTACGGGTCGCTGCAGTCAAGAATCTTCCCCAATGGCCGAAAGGCTGAGGGAGCG  
ACGCCGCGTGATGAAGAAGCCCTTCGGGGCGTAAATACTTTTTCTCTGGGACGAAACAA  
TGACGGTACCAGAGGAATAAGGAGCTGCTAACCTCGTGCCAGCAGCAGCGGTAATACGAG  
GGCTCCAAGCGTTATCCGGATTTATTGGGCGTAAAGGGTCCGTAGGCGGTTTTGTTCGCATC  
TCCTGTAAATCACAAAGGCTCAACCTTGTGGCCGCGGGAGAGATGGATAAACTAGAGACT  
AGACGAGGCAAGCGGAATTGCTGGTGTAGGGGTAAATCCGTAAATATCAGCAGGAACGC  
CAAATGTGAAAACAGCTTGCTAGGATAGTTCTGACGCTCAGGGACGAAAGCGTGGGTAGC  
GAATGGGATTAGATACCCCTGTAGTCC

>Otu15653

CCAGCCTATGGGTTGCAGCAGTCGAGGATCATTCGCAATGGGCGAAAGCCTGACGATGCG  
ACGCTGCGTGAGGATGAAGGCCTTCGGGTGTAAACTCCTGTCATGCGGGAAAAAGGTG  
CCGGGTGTCAACAACATCCGGCCTCGATGGTACCGCAAGAGGAAGCCACGGCCAACTCTG  
TGCCAGCAGCCGCGGTAATACAGAGGTGGCGAGCGTTGTTTCGGATTTACTGGGCGTAAAG  
GGCGCGTAGGTGGTTCCGTATGTGAGTGTGAAATCTCCGGGCTCAACCCGAAAGTGCG  
CTCGAAACTGCGGTTCTAGAGCCTGGGATGGGAGAGCGGAATACACGGTGTAGCGGTGAA

ATGCGCTGATATCGTGTAGAACACCGGTGGCGAAGGCGGCTCTCTGGAGCAAGGCTGACG  
CTGAGGCGCGAAAGTTGGGGGAGCAAACAGGATTAGATACCCTTGTAGTCC  
>Otu15664  
CAGCCTACGGGTGGCACCAGTAAGGAATATTGGACAATGGTGGCAACACTGATCCAGCCA  
TGCCGCGTGCAGGATGAAGGCGCTACGCGTTGTAACTGCTTTTGTACGGGAGAAGACCT  
ATCTACGTGTAGATAGCTGATAGTACCGTAAGAATAAGCATCGGCTAACTTCGTGCCAGC  
AGCCGCGTAATACGAGGGGTGCAAGCGTTGCTCGGAATTATTGGGCGTAAAGCGCGCGC  
AGGTGGCGCGGTAAGTGGCAGGTGAAAGCCCTCGGCTCAACCGAGGAAGTGCCTGTCAAA  
CTGCTGCGCTTGAGGCCGGGAGGGGAGAGCGGAATTCCTGGTGTAGCGGTGAAATGCGTA  
GATACCAGGAGGAACACCGGTGGCGAAGGCGGCTCTCTGGACCGGTTCTGACACTCATGC  
GCGAAAGCGTGGGGAGCAAACAGGATTAGATACCCGAGTAGTCC  
>Otu15665  
CCAGCCTACGGGGGGGCTGCAGTGGGGAATTTTTCGCAATGGGCGAAAGCCTGACGCAGCA  
ACGCCGCGTGGGTGATGAAGGTCTTCGGACTGTAAACCCTGTCGTCAGGGACGAAGGTG  
CTTACGTTAACAGCGTGAGTGCTTGACGGTACCTGGAGAGGAAGCCCCAGCTAACTCTGT  
GCCAGCAACCGCGGTAATACAGAGGGGGCGAGCGTTGTTTCGGAATTATTGGGCGTAAAGG  
GCGCGTAGGCGGTGCGGTAAGTCTTTTGTGAAATCTCCGGGCTCAACTCGGAGTCTGCAG  
GAGAACTGCCGTGCTTGAGTGTGGGAGAGGTGAGTGGAATTCCTGGTGTAGCGGTGAAA  
TGCGTAGATATCGGGAGGAACACCTGTGGCGAAAGCGGCTCACTGGACCACAAGTACGC  
TGATGCGCGAAAGCTAGGGGAGCAAACAGGATTAGATACCCGGGTAGTCC  
>Otu15690  
CCAGCCTATGGGTTGCAGCAGTAGGGAATTTTTCGCAATGGACGGAAGTCTGACGCAGCA  
ACGCCGCGTGAAGGTCTTCGGATCGTAAACCCTCTGTTGATTGGGAAGAATAAC  
GTCGCGGATAATAACCGCGAGGGATGACGGTACCAGTCGAGGAAGCCCCGGCTAACTACG  
TGCCAGCAGCCGCGGTAATACGTAGGGGGCAAGCGTTGTTTCGGAATTACTGGGCGTAAAG  
GGAGCGTAGGCGGATCGGTAAGTTAGGAGAGAAATCCACAGGCTTAACCTGTTGATTGCT  
TTTAAGACTGCCTTTCTTGAGTATTGGAGAGGATGATGGAATTCAGGTGTAGCGGTGGA  
ATGCGTAGATATCTGGAAGAACACCAGTTGCGTAGGCGGTCATCTGGCCAAATACTGACG  
CTGAGGCTCGAAAGCTAGGGGAGCAAACAGGATTAGAAACCCTCGTAGTCC  
>Otu15694  
CCAGCCTATGGGGCGCTGCAGTGGGGAATCCTGGGCAATGGACTAACGTCTGACCCGGTG  
AGAACACGTGCATGATGAAGGCGCTAGTTTTTTGTAAAGTGCTTTTACCGATGACGAAAA  
TGTCTGTAGTCGGCGAAAAAGCGTCGGCCAACTTCGTGCCAGCAGCTGCGGTAAGACGA  
AGGACGCGGGTGTTATTCGTTTTGATTGGGTGTAAAGGGTACGTAGGTGGCCTCTTAGTT  
TTTGGCTAAAAGAGCAGTGTGTATCAGTGCGTCTGGCCAATTTGCTAGAGGCTTGGGCTG  
GTTAAAGGTATAAACTATTCCTTACGTAAAGGGCAATTTTGGAGGTAAGGAGGAACGTC  
GACAGACGCAAGCATTTTTTCCAGTTCAGCTGACGCTGAGGTACGGAAGCTTAGGGATCA  
AACGGGATTAGAGACCCTAGTAGTCC  
>Otu15696  
CCAGCCTATGGGAGGCTCCAGCCGAGAATATTCGACAATGCACGAAAGTGTGATCGAGCG  
ACGCCGCGTGATTGATGAAGTCCCTTTGGGACGTAAAGATCTTTTGTGAGGGAAGAAGTT  
TATTGACTGTACCCCAAGAATAAGAGGCTCCTAATCTCGTGCCAGCAGGAGCGGTAATAC  
GAGAGCCTCGAGCGTTATCCGGAATTATTGGGCGTAAAGGGTGCGTAGGTTGTTCTGTTA  
GTCTTTTGTCAAATCCCCGAGCTTAACCTTGGGATACGCGAAAGAAACGTCAGAAGTTGAA  
AGTGCGAGAGGCGTACGGAACCTCATGGTGTAGGGGTGAAATCTGTTGATATCATGGGGAA  
CACCGAAAGCGAAAGCAGTACGCTAGCGTATATTTGACACTGAAGCACGAAAGCGTGGGT  
AGCGAATGGGATTAGAACCCGCGTAGTCC  
>Otu15705  
CCAGCCTACGGGGGGGCTGCAGTTAAGAATTTTCTGCAATGCGCGCAAGCGTGACAGAGCG  
AGCCAGAGTGTCTCTATGAGAACTTTTGATTACTGTAAAAGGTAGTCGAATAAGGA  
CCGGGCAAGACTGGTGCCAGCCGCCGCGGTAATCCAGCGGTTTCGAGTCGCAGCCACAAT  
TATTGGGTCTAAACATCTGTAGCTTGCTTTGCAAGTCTTTTGTGAAATCTTTTATCTTA  
AATAAGAGCGAGCAGAAGATACTGCATTGCCAGAGACCGGGAGACGTAAGAAGTATGAT  
TAAGGTAGTAGTAAAATACGTTGATCTTAATCAGACTAACAATAGCGAAGGCATCTTACG  
AGCACGGATCTGACAGTGAGAGATGAAGGCTAGGGTTCGCGAAAGGGATTAGAAACCCGCG  
TAGTCC  
>Otu15706  
CCAGCCTATGGGTGGCAGCAGTGGGGAATTTTTCGCAATGGGGGAAACCCTGACGCAGCA

ACGCCGCGTGGAGGATGAAGTACTTCGGTACGTAAACTCCTTTTCGATCGGGACGATAATG  
ACGGTACCGGAAGAAGAAGCCCCGGCTAACTTCGTGCCAGCAGCCGCGGTAATACGTAGG  
GTGCGAGCGTTGTCCGGATTTCATTGGGTTTTAAAGGGTGCGTAGGCGGACTGATAAGTCAG  
TGGTGAAAACCTGCAGCTTAACTGTAGAACTGCCATTGATACTGTCCGACTTGAGTATGG  
TCAAGGTAGGCGGAATGTGTAATGTAGCGGTGAAATGCTTAGATATTACACAGAACACCG  
ATTGCGAAGGCAGCTTACTGGGCCATTACTGACGCTGATGCACGAAAGCGTGGGGAGCGA  
ACAGGATTAGATAACCCGTGTAGTCC

>Otu15725

CCAGCCTATGGGTGGCAGCAGTCGAGGATCTTCCGCAATGCGCGAAAGCGTGACGGAGCG  
ACGCCGCGTGGGTGATGAAGGCCTTCGGGTGTAAAGCCCTGTCACCTGGGAAGAATGGC  
GGGAGGTGAATAGCCATCTCGTCTGACGCTACCAGGGGAGGAAGCACCGGCTAAATACGT  
GCCAGCAGCCGCGTAATACGTATGGTGCGAACGTTGTTTCGGAATCACTGGGCATAAAGA  
GCACGTAGGCGGTTGAGCAAGTCCATTGTGAAATCCCCCGGCTTAACCGGGGAAGTGCAG  
TGGATACTACTTGACTTGAGTGCAGGAGGGGAGAGTGGAATTCCAGGTGGAGCGGTGAAA  
TGCGTAGATATCTGGAGGAACGCCGTGGCGAAAGCGACTCTCTGGTCTGCAACTGACGC  
TGAGGTGCGAAAGCTAGGGGAGCAAACGGGATTAGATAACCCGAGTAGTCC

>Otu15739

CCAGCCTACGGGTGCGAGCAGGGAATCGTGCGCAATGGACGAAAGTCTGACGCCGCAATG  
CCGCGTGGGGGATGAAGGCCTTAGGGTTCGTAAACCCCTTTTGCCAAGGAGGAGATGCCTT  
GGAGAATAAGCGACTGCTAACTCTGTGCCAGCAGCCGCGTAATACAGAGGTCACGAGCG  
TTATCCGGATTTATTGGGCGTAAAGCGTTTCGTAGGTGATCTGTTAAGTTGCTCTTCAA  
GACCACGGCTCAACCGGGGAAAGGGGAGTAAGACTGATGGAATTGAATAGTGGTGGGGTT  
TCTAGAACTGGTGGTGTAGTAGTGAATAACGTTGATATCATCAGGAATCCAAGGGCGAA  
GGCAGGAAACTAACCATTTATTGACACTGAGGAACGACAGCTAGGGGAGCGAAAGGGATT  
AGATAACCCCTGTAGTCC

>Otu15752

CCAGCCTATGGGGGGCAGCAGTGGGGAATTTTGGACAATGGGCGCAAGCCTGATCCAGCC  
ATGCCGCGTGAGTGAAGAAGGCCTTCGGGTGTAAAGCTCTTTCGGCCGGAACGAAATCG  
CACCGTCCAACACACGGTGTGGATGACGGTACCGGAAGAAGAAGCACCGGCTAACTACGT  
GCCAGCAGCCGCGTAATACATAGGGTGCGAGCGTTAATCGGAATTACTGGGCGTAAAGC  
GTGCGCAGGCGGTTTCGCCAAGTCAGGTGTGAAATCCCCGGGCTTAACCTGGGAATGGCGC  
TTGAAACTAGCGGGCTTGAGTGCGGCAGAGGGGGGTGGAATTCACGCTGTAGCAGTGAAA  
TGCGTAGAGATGTGGAGGAACACCGATGGCGAAGGCAGCCCCCTGGGCCGACACTGACGC  
TCATGCACGAAAGCGTGGGGAGCAAACAGGATTAGATAACCCGTGTAGTCC

>Otu15755

CCAGCCTATGGGGGGCACCAGTGGGGAATATTGGGCAATGAGCGAAAGCTTGACCCATGC  
TATGCTGAGTGGGGGAGCAGAAGGTTTCGGCCGTTAAACCCCTTTTGTCAACGATTATTA  
GTGACGGTAGTCGACGAATAAGCCCCGCTAACTTCGTGCCAGCAGCCGCGTAATACGGA  
GGGGGGCTAGTGTTATTCGTGATGATTGGGCGTTAAAGTGTATGTAGGCGGTTTTATAGG  
GCCTAATGAAAACTGGAGCTTCACTCCTTAGGCGTTAGAGCACCCCTGTATTACTTGAGT  
TTAGGGGAGGATAGCAGTACTCACGAAGGAGGGGTGGAATCCTGCGATAACGATGGGGAC  
TTTCATCAGGCGAAGGCAGCTATCCATTCTAATCTGACGCTGAGATAACGGAAGCGTGGGG  
AGCAAACGGATTAGAGACCCCCGTAGTCC

>Otu15756

CCAGCCTATGGGATGCTCCAGTCGAGAATCATTCGCAATGGGCGAAAGCCTGACGGTGCG  
ACGCCGTGTGAACGAAGAAGGCCTTCGGGTGTAAAGTTCTTTCGCCCCGGAACAAGAGA  
AGCATATGAACAATGTGTTTTTTTGTATGGTACTGGGTAAAGAAGCACTGGCTAACTCCGT  
GCCAGCAGCTGCGGTAATACGGAGGGTGCAAGCATTAAATCGGATTTATTGGGCGTAAAGG  
GCGCGTAGGTTTTTTTGCAGATCAGGTGTGAAATTCGGGGGCTTAATCTCGGAGCGGCAC  
TTGAGACTACAAGAATGGAGGGTAAGCGGAGAAAGTGAATTCACGCTGTAGCGGTGAAA  
TGCGTAGATATGTGGAAGAACACCGGTGGCGAAGGCGACTTCTAGTTTACACCTGACAC  
TGAGGCGCGAAAGCAAGGGGAGCAAACAGGATTAGAAACCCCTGTAGTCC

>Otu15757

CCAGCCTATGGGTTGCTGCAGTCGAGAATCTTCCGCAATGGGCGAAAGCCTGACGGAGCG  
ACGCCGCGTGCAAGGATGAAGTGCTTCGGTATGTAAACTGCTTTTGCCAGGGAAAAAGTTA  
TTGATTGTACCTGGAGAATAAGAGGTTGCTAAACTCGTGCCAGCAGCAGCGGTAATACGA  
GTGCCTCGAGCGTTATCCGGAATCATTGGGCGTAAAGGGTGTGTAGGCGGCTATGTTAGT  
CTCGCGTAAAATCTTTCGGCTCAACCGAGAGTCCGCGCGGGAAACGGCATGGCTAAGAGG

GAGGCAGAGGTCTCTGGAACCTCTAGGTGTAGCGGTGAAATGCGTTGATATCTAGGGGAAC  
ACCAAAAGCGAAGGCAAGAGACTGGGCCGCTCCTGACGCTGTAACACGAAAGCGTGGGTC  
GCGAATGGGATTAGATACCCCCGTAGTCC

>Otu15759

CCAGCCTATGGGAGGCTGCAGTGGGGAATCTTGCGCAATGGGCGAAAGCCTGACGCAGCG  
ACGCCGCGTGAGTGATGAAGGCCTTCGGGTGTAAAGCTCTGTGGGGAGAGACGAATAAG  
TTTAGCCTAATACGCTGAGCGATGACGGTATCTCCTTAGCAAGCACCGGCTAACTCTGTG  
CCAGCAGCCGCGGTAAGACAGAGGGTGCAAACGTTGTTTCGGAATTACTGGGCGTAAAGCG  
AGTGTAGGCGGTCTTGTAAGTCGGATGTGAAAGCCCCGGGCTCAACCCGGGAAGTGCAC  
CGATACTGCGAGGCTAGAGTACTGGAGAGGTTGGTGGAATTCTCGGTGTAGAGGTGAAAT  
TCGTAGATATCGAGAGGAACACCGGTGGCGAAGGCGGCCAACTGGACAGATACTGACGCT  
GAGACTCGAAAGCGTGGGGAGCAAACAGGATTAGATACCCCAGTAGTCC

>Otu15770

GGACTACTGGGGTTTCTAATCCCGTTTGCTACCTTAGCTTTCGCGTATCAGTGTGAGAAA  
TGGTCCAGAAGGCCGCTTTCGCCACTGGTGTTCTCCGGATATCTACGCATTTTACCCT  
ACACCCGGAATTCCACCTTCTCTACCACTCTCAAGTCTTGTAAGTTTTGAACGACCTCTC  
CCAGTTAAGCCGGGAGCTTTCACATCCAACCTTACAAAACCACCTACACGCGCTTTACGCC  
CAGTAAATCCGGATAACGCTTGCCTCCTACGTTTTTACCGCGGCTGCTGGCACGTAGTTAG  
CCGAGGCTTATTCAGAGAGTACTGTCCTTCTCATCTCTCTAAAAGCACTTTACAACCC  
GAAGGCCTTCATCGTGCACGCGGCGTTGCTGGTTCGCGCTTTCGCACATTACCAATATTC  
CCTACTGCTGCACCCCATAGGCTGG

>Otu15776

CCAGCCTACGGGTTGCACCAGTGGGGAATATTGGACAATGGGGGAAACCCTGATCCAGCC  
ATGCCGCGTGAGTGATGAAGGCCTTCGGGTGTAAAGCTCTTTTGACAGGGAAGATGATG  
ACGGTACCTGTAGAATAAGCTCCGGCTAACTTCGTGCCAGCAGCCGCGGTAATACGAAGG  
GAGCTAGCGTTGTTTCGGAATTACTGGGCGTAAAGGGCGCGTAGGCGGTTTCGGCAAGTTGG  
ATGTGAAAGCCCAGGGCTCAACCCTGGGATTGCATTCAAGACTGCCTTACTTGAATTTGG  
TAGAGGTGAGCGGAATTTCCAGTGTAGAGGTGAAATTCGTAGATATTGGGAAGAACATCC  
GTGGCGAAGGCGGCTCACTGGACCAACATTGACGCTGAGGCGCGAAAGCGTGGGGATCAA  
ACAGGATTAGAAACCCTCGTAGTCC

>Otu15780

CCAGCCTACGGGATGCTGCAGTCGAGGATCTTCGGCAATGGGCGCAAGCCTGACCGAGCG  
ACGCCGCGTGATGATGAAGGCCTTCGGGTGTAAAGCACTGTGAGGGGGAGAAAAGC  
CCGCAAGGGTCTGATCTATCCCTGGAGGAAGCACGGGCTAAGTTCGTGCCAGCAGCCGCG  
GTAAGACGAACCGTGCGAACGTTATTTCGGAATCACTGGGCTTAAAGGGCGCGTAGGCGGG  
CAGTCAAGTCGGTGGTGAAATCCTCCAACCTAACTGGAGAAGAGCTGTGATACTGGCTG  
TCTCGAGGGGTGTAGGGGTCTGTGGAACAGTGGGTGGAGCGGTGAAATGCGTAGAGATCC  
ACTGGAACGCCGGTGGCGAAAGCGACGGACTGGACACCTTCTGACGCTGAGGCGCGAAAG  
CCAGGGGAGCAAACGGGATTAGATACCCTCGTAGTCC

>Otu15787

CCAGCCTACGGGGCGCAGCAGTGGGGAATCTTGCGCAATGGGCGAAAGCCTGACGCAGCG  
ATGCCGCGTGAGTGATGAAGGCCTTCGGGTGTAAAGCTCTGTGGGGAGAGACGAATAAG  
TGCGGGCGAATACCTTGATGATGACGGTATCTCCTTAGCAAGCACCGGCTAACTCTGTG  
CCAGCAGCCGCGGTAAGACAGAGGGTGCAAACGTTGTTTCGGAATTACTGGGCGTAAAGCG  
TGTGTAGGCGGTCCATCGCGTCGGATGTGAAATCCCCGGGCTCAACCCGGGAAGAGCACT  
CGATACGGGTGGACTTGAGTCTCGGAGAGGCTGGTGGAATTCCCGGTGTAGAGGTGAAAC  
TCGTAGATATCGGGAGGAACATCGGTGGCGAAGGCGGCCATCTGGACGAAGACTGACGCT  
GAGACACGAAAGCGTGGGGAGCAAACAGGATTAGAAACCCTTGTAGTCC

>Otu15788

CCAGCCTATGGGGGGCACCAAGTGGGGAATCTTGACAATGGGGGAAACCCTGATGCAGCG  
GCGCCGCGTGAGCGATGAAGCCCTTTGGGGTGTAAGCTCTTTTCGGCAGGGAAAATTATG  
ATGGTACCTGCAGAAGCAGCTGCGGCTAACTACGTGCCAGCAGCCGCGGTAATACGTAGG  
CAGCGAGCGTTGTTTCGGAGTTACTGGGCGTAAAGGGTGTGTAGGCGGTTGTTTAAAGTTG  
GTGTGAAATCTCCCGGCTCAACTGGGAGGGTGCGCCGAATACTGAATGACTAGAGTGC GG  
GAGAGGAAAGTGGAATTTCCCGGTGTAGCGGTGAAATGCGTAGATATCGGGAGGAACACCT  
GTGGCGAAAGCGGCTCACTGGACCACAACCTGACGCTGATGCACGAAAGCTAGGGGAGCAA  
ACAGGATTAGATACCCGTGTAGTCC

>Otu15814

CCAGCCTATGGGTTGCAGCAGTGGGGAATTTTGGACAATGGGCGCAAGCCTGATCCAGCC  
ATGCCGCGTGAGTGAAGAAGGCCTTCGGGTGTAAAGCTCTTTCGCGAGGGAAGAAAACG  
CAACGGATAATACCTGTTGTGGATGACGGTACCTTGATAAGAAGCACCGGCTAACTACGT  
GCCAGCAGCCGCGGTAATACGTAGGGTGCAGCGTTAATCGGAATTACTGGGCGTAAAGC  
GTGCGCAGGCGGTTTTTTAAGACAGGCGTGAAATCCCCGGGCTCAACCTGGGAATGGCGC  
TTGTGACTGGAAGGCTAGAGTATGGCAGAGGGGGGTAGAATTCACGTGTAGCAGTGAAA  
TGCGTAGAGATGTGGAGGAATACCGATGGCGAAGGCAGCCCCCTGGGCCAATACTGACGC  
TCATGCACGAAAGCGTGGGGAGCAAACAGGATTAGAAACCCTAGTAGTCC

>Otu15819

CCAGCCTATGGGGCGCAGCAGTAGGGAATATTGCACAATGGACGAAAGTCTGATGCAGCG  
ACGCCGCGTGAGTGACGAAGGCCTGCGGGTGTAAAGCACTTTTAGTGGGGATGAAATGT  
GCAGGGTTAATACCTCTGCATTTTGACCTAACCCACAGAAAAAGCACCGGCTAACTCTGT  
GCCAGCAGCCGCGGTAATACAGAGGGTGCAAGCGTTAATCGGAATTACTGGGCGTAAAGC  
GTGCGTAGACGGTTACATAAGTCGGGTGTGAAAGCCCCGGGCCCAACCTGGGAATTGCAT  
TCGAGACTGCGTAGCTAGGGTGCAGGAAGAGGGAAGCGGAATTTCCGGTGTAGCGGTGAAA  
TGCGTAGATATCGGAAGGAACACCACTGGCGAAGGCAGGCTTCCTGGTCCAGCACCGACGT  
TCAGGCACGAAAGCGTGGGGAGCAAACAGGATTAGATACCCTAGTAGTCC

>Otu15820

CCAGCCTACGGGTTCGAGCAGTGGGGAATATTGGACAATGGGGGCAACCCTGATCCAGCC  
ATGCCGCGTGAGTGAAGAAGGCCTTCGGGTGTAAAGCACTTTAAGCGGGAGGAAAGTT  
TCAAAGCTAATACCTTTGAGAATTGACGTTACCCGCAGAATAAGCACCGGCTAACTCCGT  
GCCAGCAGCCGCGGTAATACGGAGGGTGCAAGCGTTAATCGGAATTACTAGGCGTAAAGC  
GCGCGTAGGCGGCTGGATAAGTCGATTGTGAAATCCCCGGGCTCAACCTGGGAATTGCAG  
TCGAGACTGTTTCGGCTAGAGTGTGGGAGAGGGTGGTGGAATTTCCGGTGTAGCGGTGAAA  
TGCGTAGATATCGGGAGGAACATCAGTGGCGAAGGCGACCACCTGGACCTACACTGACGC  
TGAGGTGCGAAAGCGTGGGTAGCAAACAGGATTAGAGACCCCGTAGTCC

>Otu15826

CCAGCCTACGGGTTCGAGCAGTAGGGAATTTTCCACAATGGGCGAAAGCCTGATGGAGCA  
ACGCCGCGTGAGGATGGAGGCTTTAGGGTGTAAACTGCTTTTATTTGTGACGATTATG  
ACGGTAACAAATGAATAAGGACCTGCTAACTACGTGCCAGCAGCCGCGGTACATACGTGGG  
GTCCAAGCGTTATCCGGAATTACTGGGCGTAAAGAGTTGCGTAGGTGGCAGAGTAAGTAG  
GTAGTGAAATTGTGTGGCTCAACCATAACCCATTATCTAAACTGCTCAGCTAGAGTATG  
GGAGAGGTCAGTGAATTTCTAGTGTAGGAGTGAAATCCGTAGATATTAGAAGGAACACC  
GATGGCGTAGGCAGGTGACTGGCCATTACTGACACTAAGGCACGAAAGCGTGGGGAGCG  
AACTGGATTAGATACCCGCGTAGTCC

>Otu15838

CCAGCCTACGGGTTCGACCAGTTGGGAATCTTGCACAATGGGGGAAACCCTGATGCAGCG  
ACGCCGCGTGAGGACGAAGGGTTTAGGCCTGTAAACTCCTTTTATCGGGAAAGACTTAG  
GACGGTACCCGATGAATAAGCACCGGCTAACTACGTGCCAGCAGCCGCGGTAAGACGTAG  
GGTGCAAGCGTTGTCCGGATTTACCGGGCGTAAAGAGCGCGTAGGCGGTCTGTTAAGTGT  
AGAGTGAAATCTCCAGGGCTCAACCCGGAACCTGCTCTGCATACTGGCAGACTTGAGGGT  
CGGAGAGGTCTATGGAATTCCTGGTGTAGCGGTGAAATGCGTTGATATCAGGAGGAACAC  
CCATGGCGAAGGCAGTAGACTGGCCGACATCTGACGCTGAGGCGCGAAAGCGTGGGTAGC  
AAACAGGATTAGAAACCCCGGTAGTCC

>Otu15850

CCAGCCTATGGGTGGCTGCAGTGGGGAATTTTGCAGCAATGGGGGAAACCCTGACGCAGCA  
ACGCCGCGTGAGGATGAAGTACTTCGGTACGTAAACTCCTTTTCGATCGGGACGATAATG  
ACGGTACCGGAAGAAGAAGCCCCGGCTAACTTCGTGCCAGCAGCCGCGGTAATACGTAGG  
CAGCGAGCGTTGTTCCGAATTACTGGGCGTAAAGAGTGTGTAGGCGGTGCTCTAAGTTCG  
GTGTGAAATCTCCTGGCTTAACTGGGAGGGTGCGCCGGAACCTGGAGTGCTCGAGCGTGG  
GAGAGGAAAGCGGAATTCCTGGTGTAGCGGTGAAATGCGTAGATATCAGGAGGAACACCT  
GCGGTGTAGACGGCTTTCTGGACCGTAACTGACGCTGAGACACGAAAGCGTGGGTAGCAA  
ACAGGATTAGAAACCCCGTAGTCC

>Otu15853

CCAGCCTACGGGGGGGCTCCAGTCGAGAATTTTTCACAATGGGGGAAACCCTGATGGAGCG  
ACGCCGCGTGGGGGATGAATGGCTTCGGCCCGTAAACCCCTGTCATTTGCGAACAAACCT  
TTTCATTTAACAGATGGGAAGTTTGATTGTAGCAGAAGAGGAAGGGACGGCTAACTCTGT  
GCCAGCAGCCGCGGTAATACAGAGGTCCCAAGCGTTGTTCCGATTCACTGGGCGTAAAGC

GTGCGTAGGTGGTCGGGTAAGTTTGATGTGAAATCTCGAAGTTCAACTTCGAAACTGCAT  
TGAATACTACTCGGCTGGAGGGTCGGAGGGGGGACTGGAATTCTCGGTGTAGCAGTGAAA  
TGCGTAGATATCGAGAGGAACACCAGTGCGGAAGGCGAGTCCCTGGACGACTCCTGACAC  
TGAGGCACGAAAGCTAGGGGAGCAAACAGGATTAGAAACCCCTGTAGTCG

>Otu15858

CCAGCCTACGGGGGGCTGCAGTGGGGAATATTGGACAATGGGCGCAAGCCTGATCCAGCC  
ATGCCGCGTGATGATGAAGGCCCTAGGGTTGTAAAGCTCTTTTACCAGGGAAGATGATG  
ACGGTACCTGGAGAATAAGCACCGGCTAACTTCGTGCCAGCAGCCGCGGTAATACGAAGG  
GTGCTAGCGTTGTTTCGAATTACTGGGCGTAAAGCGTGCGTAGGCGGCTACTTAAGTCAG  
AGGTGAAATCCTTGGGCTCAACCCAAGAATTGCCTTTGAACTAAGTAGCTTGAGTATTG  
GAGGGGAGTGCGGAATTCCTAATGTAGAGGTGAAATTCGTAGATATTAGGAGGAACACCG  
GTGGCGAAGGCGGCACTCTGGACAATTACTGACGCTCTGGCACGAAAGTGCGGGGATCAA  
ACAGGATTAGAGACCCGTGTAGTCC

>Otu15863

CCAGCCTACGGGTTGCTGCAGTGGGGAATCTTGACAATGGAGGAAACTCTGACGCAGCG  
ACGCCGCGTGGGTGATGAAGGCTTTCGGGTCGTAAAGCCCTGTGCGAAGGGACGAAAAAT  
AATATGGCTAACATCCATGTTACTTGACGGTACCTTCAAAGGAAGCACCGGCTAACTACG  
TGCCAGCAGCCGCGGTAATACGTAGGGTGCAAGCGTTGTTTCGAATCATTGGGCGTAAAG  
CGCGTGTAGGTGGTTTTGTAAAGTCGGGTGTGAAATCCCTGGGCTTAACCGAGGAAGTGCA  
TCCGAAACTACAAAGCTAGAGGACGGTAGAGGAAGGTGGAATTCCTAGTGTAGAGGTGAA  
ATTCGTAGATATTAGGAGGAATACCGGCGGCGAAGGCGGCCCTTCTGGGCCGGTTCTGACA  
CTGAGACGCGAAAGCGTGGGTAGCAAACAGGATTAGATACCCTAGTAGTCC

>Otu15878

CCAGCCTACGGGTGGCAGCAGTGGGGAATATTGGACAATGGGGGAAACCCGTATCCAGCC  
ATGCCGCGTGAGTGATGAAGGCCCTTAGGGTTGTAAAGCTCTTTTGTGAGGGAAGATGATG  
ACGGTACCTGAAGAATAAGCACCGGCTAACTTCGTGCCAGCAGCCGCGGTAATACGAAGG  
GTGCTAGCGTTGTTTCGAATCACTGGGCGTAAAGCGCGCGTAGTCGGCTTTGCAAGTCAG  
GGGCGAAATGCCAAGGCTCAACCTTGAACTGCCTTTGAACTGCAAAGCTAGAGTGTCG  
GAGGGGATAGCGGAATTGCTAATGTAGAGGTGAAATTCGTAGATATTAGCAGGAACACCG  
GTGGAGAAGGCGGCTATCTGGACGACAACCTGACGATTAGGCGCGAAAGCACGGGGATCAA  
ACAGGATTAGAAACCCCTAGTAGTCC

>Otu15882

CCAGCCTATGGGTTGCTGCAGTGGGGAATCTTGCGCAATGGGCGAAAGCCTGACGCAGCC  
ACGCCGCGTGAGTGAAGAAGGCCCTTCGGGTGTAAAGCTCTGTGCGAGGGGACGAAAAGT  
CATAGGGTTAACAGCCCTGTGATCTGACGGTACCCTCAAAGGAAGCACCGGCTAACTTCG  
TGCCAGCAGCCGCGGTAATACGAGGGGTGCAAGCGTTGCTCGGAATTATTGGGCGTAAAG  
GGTAGGTAGGTGGTCTCGTTTGTCTGGGGTGAAAGCCTTGAGCTTAACTCAAGAAGTGCC  
CTAGAAACGGCGAGACTAGAATCTTGAGAGGGTCTGTGGAATTCCTGGTGTAGCGGTGAA  
ATGCGTAGAGATCGGGAGGAACACCAGAGGCGAAGGCGGCGACCTGGACAAGTATTGACA  
CTCAACTACGAAAGCGTGGGTAGCAAACAGGATTAGATACCCTAGTAGTCC

>Otu15884

CCAGCCTACGGGACGCACCAGCAGATCATCGATTGCCTTGCGGAGTGCTGGTCCTG  
GATACCGCTGAGACCATCGTGACCATCAACCCCGAAGGGCGCAGGCTGCTGGAGCTGGGA  
AGCGCGCAGGTCAAAGCCTGAGCGACCTCTCGCGAAGCAGTCAGGTGAACCTCGAGACG  
CTGATGGTAGCGCCTGAGCATCTCGATCACGAGTTGTGCATTGCCTCCGCCGGGGGCAAG  
CGCTGGCTGGGGATCGGCAACCGAAAGCTGTATGCGCGACAGCAAGTCCAGATGCGGAC  
GGTTCGCGCTCGGCGCTGCAGAGCATATGGATTCTGCGCGATATCACCGCAAGCAAGCAG  
GCCGAGCAGGAGCGCAAGCAGCGCGGGGCGCAATGGCCCTGGCCGAAATCTCGACAATC  
CTGGCACACGAGATTAGATACCCAGTAGTCC

>Otu15889

CCAGCCTATGGGGGGCAGCAGTTAAGGAACTTTTACAATGCTCGAAAGAGTGATAAAATC  
AACCAGAGTGTTTTCTTTTAGAAAACCTTTTGTCAACTGTAAAAAGGCTGATGAATAAGGA  
CTGGGCAAGACCGGTGCCAGCCGCCGCGGTAATCCCGGCGGTCCGAGTCGCATCCACAAT  
TATTGGGTCTAAACATCCGTAGCTTGTTTTGTAAAGTCTCTTGTGAAATCTCATTTCTCA  
AACTTGAGGCGTGCAAGAGATACTGCAAAGCTAGAGATCGGAAGGCGCAAAGAGAACGAC  
GGAGGTAGTGGTAAAATATGTTAATCTTCGTGCGACTAACAATGGCGAAGGCACTTTGCG  
AGTACGAATCTGACAGTGAGGGATGAAGGCTAGGGGCGCAAAGGGATTAGAAACCCTAG  
TAGTCC

>Otu15895

CCAGCCTACGGGACGCAGCAGTGGGGAATATTGGACAATGGGGGCAACCCTGATCCAGCA  
ATGCCGCGTGTGTGAAGAAGGCCTGCGGGTTGTAAAGCACTTTCAGTAGGGAAGAAAAGC  
CTGGGGTTAATAACTCCGGGTTTTGACGTTACCTAAAGAAGAAGCACCGGCTAACTCCGT  
GCCAGCAGCCGCGTAATACGGAGGGTGCAGCGTTAATCGGAATTACTGGGCGTAAAGC  
GCACGTAGGCGGTTGGGTAAAGTCGGATGTGAAAGCCCTGGGCTTAACCTGGGAAGTGCAT  
TCGATACTGCCCCGCTAGAGTATGGGAGAGGGAAGCGGAATTTCCGGTGTAGCGGTGAAA  
TGCGTAGATATCGGAAGGAACACCAATGGCGAAGGCAGCTTCCTGGCCCAATACTGACGC  
TGAGGTGCGAAAGCGTGGGGAGCAAACAGGATTAGATAACCTGGTAGTCC

>Otu15902

CCAGCCTATGGGGTGCAGCAGTCGGGAATCTTGGACAATGGGCGCAAGCCTGATCCAGCC  
ATGCCGCGTGAATGATGAAGGCCTTAGGGTTGTAAATTCCTTTCGTGGGGGACGATAATG  
ACGGTACCCCCAAGAAGAAGCTCCGGCTAACTTCGTGCCAGCAGCCGCGGTAATACGAAGG  
GGGCTAGCGTTGTTTCGAATTACTGGGCGTAAAGCGCGTGTAGGCGGACCGTTAAGTCGG  
GGGTGAAAGCCCAGAGCTCAACTCTGGAAGTGCCTTCGATACTGGCGATCTGGACCCAAG  
TAGAGGCGAGTGGAATTACGAGTGTAGAGGTGAAATTCGTAGATATTCGTAGGAACACCA  
GTGGCGAAGGCGACTCGCTGGACTTGTGGTGACGCTGAGACGCGAAAGCGTGGGGAGCAA  
ACAGGATTAGATAACCCCCGTAGTCC

>Otu15905

CCAGCCTATGGGGGGCTGCAGTGGGGAATTTTGGACAATGGGGGCAACCCTGATCCAGCC  
ATGCCGCGTGAGTGAAGAAGGCCTTCGGGTGTAAAGCTCTTTCGGCCGGAAGAAAGCT  
TGCTTGCGAATAGTGGGTGAGGTTGACGGTACCGGCAGAAGAAGCACCGGCTAACTACGT  
GCCAGCAGCCGCGTAATACGTAGGGTGCAGCGTTAATCGGAATTACTGGGCGTAAAGC  
GTGCGCAGGCGGTTGATTAAAGCTTGCTGTGAAAGCCCCGGGCTTAACCTGGGAACGGCAG  
TGAGGACTGGTGCAGTGGAGTGTGGCAGAGGGGGGTGGAATTCACGTGTAGCAGTGAAA  
TGCGTAGAGATGTGGAGGAACACCGATGGCGAAGGCGGCCCCCTGGGCTAACACTGACGC  
TCAGGCACGAAAGCGTGGGGAGCAAACAGGATTAGATAACCCGCGTAGTCC

>Otu15908

CCAGCCTATGGGTTGCTGCAGTCGAGAATCTTCCACAATGGACGAAAGTCTGATGGAGCG  
ACGCCGCGTGATTGATGAAGTCCTTCGGGACGTAAAGATCTTTTATGAGGGAAGAAGTTT  
ATTGACGGTACCTCATGAATAAGGGGCTCCTAATCTCGTGCCAGCAGGAGCGGTAATACG  
AGAGCCCCGAGCGTTATCCGGAATTATTGGGCGTAAAGGGTGCGTAGGCGGTTTTGTAG  
TCGTATGTTAAAGACCCGAGCTTAACTTGGGGAAGGCGTACGAAACGGCAAGACTTAGAA  
TGAAGGAGGGGTGTGTGGAAGTCACTGGTGTAGGGGTGAAATCCGTTGATATCATGGGGAA  
CACCAAAAGCGAAAGCAGCACACTGGCCTTTTATTGACGCTGAGGCACGAAAGCGTGGGT  
AGCGAACCGGATTAGAACCCCGGTAGTCC

>Otu15910

CCAGCCTATGGGTTGCACCAGTCGAGAATTTTTCTCAATGGGCGAAAGCCTGAAGGTGCG  
ACGCCGCGTGAGGATGAAGGTCCTAGGATTGTAAACTCCTGTCATCAGGGAGTAAAGCT  
CAGGCGTTAATAGCGCTTTGAGCCTGATAGTACCTGAAGAGGAAGGGGCGGCTAACTCCG  
TGCCAGCAGCCGCGGTAACACGGAGGCCTCAAGCGTTGTTTCGAATTACTGGGCGTAAAG  
GGTGCGTAGGCGGCGGGTAAAGTCAGATGTGAAAGCCCGGGGCTCAACCCCGGAATTGCA  
TCCGATACTGCCCTTGCTAGAGGATTGGAGAGGAGACTGGAATTCACGGTGTAGCAGTGAA  
ATGCGTGGATATCGTGAGGAAGGCCAATGGCGAAGGCAGTCTCTGGACAATTCCTGACG  
CTGAGGCACGAAGGCCAGGGGAGCAAAAAGGATTAGAGACCCAGTAGTCC

>Otu15921

CCAGCCTACGGGTGGCACCAGCTAAGAATATTCCACAATGGACGAAAGCCTGAAGGAGCG  
ACGCCGCGTGGGGGATGAAGGGCTTCGGCTCGTAAACCCCTGTCATTTGCGAACAAACCC  
TGCAGTTTAACAGATTGCAGGCTGATTGTAGCAGAAGAGGAAGGGACGGCTAACTCTGTG  
CCAGCAGCCGCGGTAATACAGAGGTCCCAAGCGTTGTTTCGGAATTCCTGGGCGTAAAGGG  
TGCGTAGGTGGCAAGGTAAGTTTGATGTGAAATCTCCGGGCTTAACCCGGAACTGCATT  
GAATACTCTCTTGCTCGAGGGTTGGAGGGGAGACTGGAATACTTGGTGTAGCAGTGAAAT  
GCGTAGATATCAAGTGGAACACCAGTGGCGAAGGCGAGTCTCTGGACAATCCTGACACT  
GAGGCACGAAAGCTAGGGGAGCAAACAGGATTAGAAACCCAGTAGTCC

>Otu15924

GCCAGCCTATGGGGGGCAGCAGTAAGGAATATTGGACAATGCTCGCAAGAGTGATCCAGC  
CATGCCGCGTGCAGGAAGACGGCCCTATGGGTTGTAAACTGCTTTTGAAGTAGAGAAAAC  
CCTCCTACGTGTAGGAGGCTGATAGCATAGTTAGAATAAGCATCGGCTAACTTCGTGCCA



GCAGCCGCGGTAAGACGAAGGATGCAAGCGTTATCCGGATTTCATTGGGTTTAAAGGGAGC  
GTAGGTGGACTTATAAGTCAGTGGTGAACCTGCAGCTTAAGTGTAGAAATTGCCATTGA  
TACTGTTAGTCTTGAGTACGGTCAAGGTAGGCGGAATGTGTAATGTAGCGGTGAAATGCT  
TAGATATTACACAGAACACCGATTGCGAAGGCAGCTTACTGGGCCATTACTGACGCTGAT  
GCACGAAAGCGTGGGGAGCAAACAGGATTAGATAACCCGAGTAGTCC

>Otu15937

CCAGCCTATGAGGCTCCAGTGGGGAATTTTGGACAATGGGCGCAAGCCTGATCCAGCCAT  
GCCGCGTGAGTGAAGAAGGCCTTCGGGTTGTAAAGCTCTTTCGGCCGGGAAGAAATCGCA  
TGGGTAAATACCCTGTGTGGATGACTGTACCGGAATAAGAAGCACCGGCTAACTACGTGC  
CAGCAGCCGCGGTAATACGTAGGGTGCAGCGTTAATCGGAATTACTGGGCGTAAAGCGT  
GCGCAGGCGGTTTGTAAAGACAGGCGTGAAATCCCCGGGCTCAACCTGGGAACTGCGCTT  
GTGACTGCAAGGCTAGAGTATGGCAGAGGGGGGTGGAATTCACGTGTAGCAGTGAAATG  
CGTAGAGATGTGGAGGAACACCGATGGCGAAGGCAGCCCCCTGGGCCAATACTGACGCTC  
ATGCACGAAAGCGTGGGGAGCAAACAGGATTAGAAACCCCTCGTAGTCC

>Otu15948

CCAGCCTATGGGTGGCTGCAGTGGGGAATATTGCGCAATGAGCGAAAGCCTGACGCAGCA  
ACGCCGCGTGAGTGATGAAGGCCTTCGGGTTGTAAAGCTCTTTCGGCCGGGAAGAAGGGG  
TATGGTGTGAATAGCATTGTACTTTGATGGTACCGGAAGAAGAAGCACCGGCTAACTTCG  
TGCCAGCAGCCGCGGTAATACGAAGGGTGCAGCGTTGTTTCGGAATTACTGGGCGTAAAG  
GGTTCGTAGGCGGGAATTTAAGTCAAGTGTGAAATCCCCGAGCTTAACTTGGGACGTGCA  
TTTGAAGTGTAGTTCCTTGAGTATTGGAGAGGGTGGTGGAAATTGTTGGTGTAGGAGTGAC  
ATCCGTAGAGATCAGCAGGAACATCAGATGCGAAAGCGACCGCCTGGCCGATTACTGACG  
CTGAGGAACGAAAGCGTGGGGAGCAAACAGGATTAGAAACCCCTAGTAGTCC

>Otu15949

CCAGCCTACGGGATGCAGCAGGCGCGAAACCTTTACAATGCACGCAAGTGTGATAGGGGA  
ATCCAGAGTGCTTATACACAGTATAGGCTTTTGCCAAGAGTAAATACCTTGGAGAATAAG  
TGGTGGGAAAGACTGGTGCCAGCAGCCGCGGTAACCCAGCGCCACTAGTGGGAATCGCG  
TTTATTGGGCCTAAAGCATCCGTAGCTGGTTATGTAAATCTCTTGTGAAATTGTTAGGCT  
CAACCTAACAGCGTGCAGGAGACACTGCAAACTAGGGACTGGGAGGCGTCAGAGGTATG  
CTGTGGGGAGCGGTAAAATGCTATAATCCACGGTAGACCACCTGTGGCGAAGGCGTCTGA  
CGAGAACAGGTCCGACAGTGAGGGATGAAAGCCAGGGGAGCAAACCGGATTAGAGACCC  
CGTAGTCC

>Otu15951

CCAGCCTATGGGTGGCTCCAGTCGAGAATTTTTTACAATGGGCGAAAGCCTGATGGAGCG  
ACGCCGCGTGGGGGATGAATGGCTTCGGCCCGTAAACCCCTGTCATTTGCGAACAAACCT  
CTGCACCTAACACGTACAGAGCTGATTGTAGCGAAAGAGGAAGGGACGGCTAACTCTGTG  
CCAGCAGCCGCGGTAATACAGAGGTCCCAAGCGTTGTTTCGGATTCACTGGGCGTAAAGGG  
TGCGTAGGCGGTGCGGTAAGTCTGATGTGAAATCTCGAAGCCTAACTTCGAACTGCATT  
GGATACTATTTCGGCTTGAGGAATGGAGGGGAGACTGGAATGCTCGGTGTAGCAGTGAAAT  
GCGTAGATATCGAGCGGAACACCAGTGGCGAAGGCGAGTCTCTAGACATTTCTCTGACGCT  
GAGGCACGAAAGCCAGGGGAGCAAACGGGATTAGAAACCCCTCGTAGTCC

>Otu15969

CCAGCCTATGGGATGCAGCAGTTCGGAATATTTCGGCAATGGACGAAAGTCTGACCGAGCG  
ACGCCGCGTGCGGGATGAAGGCCCTTTGGGTTGTAAACCGCTGTCACAGGTGAGCAAATC  
ACAGGGTGTAAACACCACTCTGTGTTGAGTTAAGCTTGAGAGGAAGCCCCCGCTAATCAC  
GTGCCAGCAGCGCGGTAATACGTGAGGGGCGAACGTTGTTTCGGTGTCACTGGGCTTAAA  
GGGCGCGTAGGTGGTTGCGTAAGTAACGTGTGAAATCCCTCGGCTTACCCGGGGAATTGC  
GCGTTATACTGCGTGACTTGAGGACCACAGGGGAAGGGGGAAGTCCAGGTGTAGCGGTGA  
AATGCGCAGATATCTGGGGGAAGGCCGGCGGCGAAGGCGCCCTTCTGGGTGGTTCTCTGAC  
ACTGAGGCGCGAAAGCGTGGGGAGCAAACAGGATTAGATAACCCCGTAGTCC

>Otu15970

CCAGCCTATGGGAGGCTCCAGTCGAGAATATTCCGCAATGGGCGAAAGTCTGACGATGCG  
ACGCCGCGTGAAATGATGAAGGCCTTCGGGTCGTAAAGTTCTGTGTCCTGGAACAAGAGT  
GGTAGACGAATAGTCTATCATGATGAGTGTACAGGGAAAGGAAGCACCGGCTAATTCCGT  
GCCAGCAGCTGCGGTAATACGGAAGGTGCAAGCGTTAGTCGGAATTACTGGGCGTAAAGG  
GTGCGTAGGCTGTTATATAAGTCGGATGTGAAATTTTCGAGGCTCAACCTCGGAGCTGCAT  
TCGAAACTGTATACTAGAGGAATGGCGGAGAAAATGGAATTCATGTGTAGCGGTGAAA  
TGCGTAGATATATGGAAGAACACCTGTGGCGAAAGCGGTTTTCTAGCTTTTTCTCTGACGC

TGAGGCACGAAAAGCAAGGGGATCAAACAGGATTAGAAAACCCCGGTAGTCC

>Otu15975

CCAGCCTACGGGGTGCTGCAGTAGGGAATATTGGGCAATGGAGGCAACTCTGACCCAGCC  
ATGCCGCGTGACAGGATGAAGGCCCTCTGGGTGTAACTGCTTTTATCAGGGAAGAAACA  
ACGGGATTTCATCCTGTTCTGACGGTACCTGAGGAATAAGCACCGGCTAACTCCGTGCCAG  
CAGCCGCGGTAATACGGAGGGTGCAAGCGTTATCCGGATTTACTGGGTTTAAAGGGTGCG  
TAGGCGGGCTTTTAAGTCAGTGGTGAAAGATTCGAGCTTAACTCGAGAACTGCCATTGAT  
ACTGAAGGCCTTGAGTACAGTTGAGGTGGGCGGAATGAGTCATGTAGCGGTGAAATGCTT  
AGATATGACTCAGAACACCAATTGCGAAGGCAGCTCGCTAACTGTAACTGACGCTGAGG  
CACGAAAGCGTGGGTAGCAAACAGGATTAGAGACCCCGGTAGTCC

>Otu15984

CCAGCCTACGGGGGGCAGCAGTTGGGAATCTTGACACAATGGGGGAAACCCTGATGCAGCG  
ACGCCGCGTGAGGATGAAGGATCTAGGTCTGTAACTCCTTTTTTCAGGGAAAGACTTAG  
GACGGTACCCTGAGAATAAGGACCGGCTAACTACGTGCCAGCAGCCGCGGTAAGACGTAG  
GGTCCAAGCGTTGTCCGGATTTACTGGGCGTAAAGAGCGCGTAGGCGGTCTGTTAAGTGT  
GAAGCTAAATCTCCGGGCTCAACCCGGAACCTATTTTCGCATACTGGCAGACTAGAGTGAT  
GAAGAGGTTTGTGGAATTCTTGGTGTAGCGGTGAAATGCGTTGATATCAGGAGGAACACC  
CATGGCGAAGGCAGCAAACCTGGTCACCAACTGACGCTGAGGCGCGAAAGCGTGGGTAGCA  
AACAGGATTAGAGACCCGCGTAGTCC

>Otu15986

CCAGCCTATGGGGGGCTCCAGTGAGGAATATTGGTCAATGGGCGCAAGCCTGAACCAGCC  
ATGCCGCGTGAGGATGAAGGCCCTGCGGGTCGTAACTTCTTTTGTATGAGACGAAACC  
CCTGAACGTGTTCCGGGCTGACGGTATTGTACGAATAAGCATCGGCTAACTCCGTGCCAG  
CAGCCGCGGTAATACGGAGGATGCAAGCGTTATCCGGATTCATTGGGTTTAAAGGGTGCG  
TAGGCGGGATAGTAAGTCAGTGGTGAAATCCTGCAGCTTAACTGCAGAACTGCCGTTGAT  
ACTGCTATTCTTGAGTACAGTTGAGGTGGGTGGAATGTGTGGTGTAGCGGTGAAATGCTT  
AGATATTACACAGAACACCGATTGCGAAGGCAGCTCACTAAGCTATTACTGACGCTGAGG  
CACGAAAGCGTGGGGAGCAAACAGGATTAGAAAACCCCGGTAGTCC

>Otu15988

CCAGCCTATGGGTCGCTGCAGTGGGGAATTTTGACACAATGGGGGAAACCCTGGTGCAGCA  
ACGCCGCGTGAGGATGAAGTCCCTTGGGATGTAACTCCTTTTCGACCGGGACGATAATG  
ACGGTACCGGTGGAAGAAGCCCCGGCTAACTCTGTGCCAGCAGCCGCGGTAATACAGAGG  
GGGCAAGCGTTGTTCCGAATTATTGGGCGTAAAGGGCGCGTAGGCGGTTTCGTTAAGTCAG  
ATGTGTAATCCCCGAGCTCAACTTGGGAACGCATCTGAGACTGGCGGGCTAGAGTACTG  
GAGAGGGTGGTAGAATTCCACGTGTAGCGGTGAAATGCGTAGAGATGTGGAGGAATACCA  
GTGGCGAAGGCGGCCACCTGGACAGTAACTGACGCTGAGGCGCGAAAGCGTGGGGAGCAA  
ACAGGATTAGAAAACCCAGTAGTCC

>Otu15991

CCAGCCTATGGGGGGCTGCAGTAACGAATATTCCGCAATGGGCGAAAGCCTGACGGAGCG  
ACGCCGCGTGACAGGAGGAAGTCCCTTCGGGATGTAACTGCTGTCAGAGGTTACCAAGTGA  
CTGCGCCCAATATGCGCAGAAGCTGAGGAGCCTCAGAGGAAGCCACGGCTAACTTCGTGC  
CAGCAGCCGCGGTAAGACGAAGGTGGCAAGCGTTGTTCCGAATCACTGGGCTTAAAGAGC  
ACGTAGGCGGCTCATCAAGTGTCTCGTGAAATCCCCCGGCTCAACCGGGGAATTGCTTGG  
CAAACCTGATGGGCTTGAGGCAGGTAAGGGTGGGTGGAACCTTGGTGGAGCGGTGAAATG  
CGTAGATATCAAGAGGAACGCCGGTGGTGAAGACGACCCACTAGGCTTGTCTTGACGCTG  
AGGTGCGAAAGCCAGGGGAGCAAACGGGATTAGATACCCAGTAGCC

>Otu15994

CCAGCCTACGGGATGCTCCAGTGGGGAATCTTGACACAATGGGGGCAACCCTGATGCAGCG  
ACGCCGCGTGAAATGATGAAGGCCCTTCGGGTGTAAAGTTCAGTAAGCAGGGAAGAATAAG  
CAACGGGTAATATTCGTTGTGATGACGGTACCTGCCTAAAGCCCCGGCTAACTACGTGCC  
AGCAGCCGCGGTAATACGTATGGGGCGAGCGTTGTTCCGAATTATTGGGCGTAAAGGGCG  
TCTAGGCGGGGATTAAAGTTAGATGTGAAAGCCACGGGCTCAACCCGTGAACTGCATCTA  
AGACTGGTTCTCTTGAGTTCGGGAGAGGAGAGCGGAATTCCAAGTGTAGCGGTGAAATGC  
GTAGATATCTGGAAGAACACCAAGTGGCGAAGGCGGCTCTCTGGCCTAGAACTGACGCTGA  
AGCGCGAAAGCGTGGGGAGCGAACAGGATTAGATACCCGTGTAGTCC

>Otu15997

CCAGCCTACGGGTGGCACCAGTCGAGAATATTCCGCAATGGGCGAAAGCCTGACGGAGCG  
ACGCCGCGTGACAGGATTAAGTACTTCGGTATGTAACTGCTTTTATGAGTGAAGAAATAA

TTGACATTAGCTCATGAATAAGAGGTTGCTAAACTCGTGCCAGCAGCAGCGGTAATACGA  
GTGCCTCAAGCGTTATCCGGAATCATTGGGCGTAAAGGGTGCGTAGGTGGCTTTGTTAGT  
CTCTTGTTAAACCTTTTCGGCTTAACCGAAAATCTGCAGGAGAAACGGCATCGCTCGAGTA  
CGGGAGGGGTTTGCAGGAATCATAGTGTAGGGGTGAAATCCGTTGATATTATGGGGAACA  
CCAAAAGCGAAGGCAGCAAACTGGTCCGTTACTGACACTGAAGCACGAAAGCGTGGGTCG  
CGAATGGGATTAGAAACCCCTGTAGTCC

>Otu16013

CCAGCCTATGGGTGGCAGCAGTGGGGAATACTGGACAATGAACGAAAGTTTGATCCAGCT  
ATATTGCGTGAGCGAAGTATTATTATATATTAATAATCTGAAGGTCTCGAATTGTAAAGC  
TCTTTTATAAGTGAAAATAATGATATTAGCTTATGAATAAGTACCGGCTAACTTCGTGCC  
AGCAGCCGCGGTAAAACGGAGGGTACAAGTGTTATTTCGTGTTAACTGGGCGTAAAGGATA  
TGTTAGGTGGTTTTACCCGTAATTTGTAAAAGACTGGATGTAAATTTCTTGAATGCAAATT  
AAACCGTAAGACTTGAGTATAAGAGAGGATTGCAGTACTAATATTGTAAAGGTTGGAATTT  
TGTCATAATATTAGGACTATCAATAGGCGAAGGCGGCTATCTGGCTTAGGACTGACACTG  
ATATATGAAAGCATAGGTAACAAATAGGATTAGATACCCGAGTAGTCC

>Otu16020

CCAGCCTACGGGGGGCTGCAGTGGGGAATCTTGCGCAATGGACGAAAGTCTGACGCAGCG  
ACGCCGCGTGGGTGATGAAGGCCTTCGGGTGTAAAGCCCTGTGGGGCGGGACGAATAAG  
TGCAATCCAATACATTGCATGATGACGGTACCGCCTTAGCAAGCACCGGCTAACTCTGTG  
CCAGCAGCCGCGGTAAAGACAGAGGGTGCAAACGTTGTTTCGGAATTACTGGGCGTAAAGCG  
TGTGTAGGCGGCCACGTAAGTTGGATGTGAAAGCCCCAGGCTTAACCTGGGAAGTGCACC  
CAAACCTGCATGGCTTGAGTATCGGAGAGGTTGGTGGAATTCTCGGTGTAGAGGTGAAAT  
GCGTAGATATCGAGAGGAACACCGGTGGCGAAGGCGGCCAACTGGACGAATACTGACGCT  
GAGACACGAAAGCGTGGGGAGCAAACAGGATTAGAGACCCCTCGTAGTCC

>Otu16022

CCAGCCTACGGGGCGCTGCAGTGGGGAATTTTGGACAATGGGGGCAACCCTGATCCAGCC  
ATGCCGCGTGTGTGATGAAGGCCTTCGGGTGTAAAGCACTTTCGCACGTGACGATGATG  
ACGGTAACGTGAGAAGAAGCCCCGGCTAACTTCGTGCCAGCAGCCGCGGTAATACGAAGG  
GGGCAAGCGTTGTTTCGGAATTACTGGGCGTAAAAGGTTTCGTAGGCGGGAATGCAAGTCAA  
GTGTGAAATCCCCAGGCTCAACCTGGGACGTGCATTTGAGACTGTGTTTCTTGAGTTTCG  
GAGAGGGTGGTGGAATTGCTGGTGTAGGAGTGACATCCGTAGAGATCAGCAGGAACACCG  
GAGGCGAAGGCGACCACCTGGCCGAATACTGACGCTGAGGAACGAAAGCGTGGGGAGCAA  
ACAGGATTAGAAACCCCCGTAGTCC

>Otu16023

CCAGCCTATGGGAGGCACCAAGTGGGGAATTTTACGCAATGGGCGAAAGCCTGACGTAGCG  
ACACCGCGTGAGCGAAGAAGCCCTTTGGGGTGTAAGCTCTGTGCGGTGGAACGAAAAAA  
ATGACGGTACCAGCAAAGGAAGCATCGGCTAACTACGTGCCAGCAGCCGCGGTAAGTCGT  
AGGATGCGAGCGTTGTCCGGATTTCATTGGGCGTAAAGAGTTCGTAGGCGGTTTGTAAAGT  
CTGATGTTAAAGGCTCGGGCCCAACCCGGGTATCGCATTGGATACGGGCAGACTGGAGTG  
CAGTAGAGGCAAGTGGAATTCCCAGTGTAGCGGTGAAATGCGTAGATATTGGGAAGAACA  
CCGGTGGCGCAGGCGACTTGCTGGGCTGTAACCTGACGCTGAGGAACGAAAGCTAGGGGAG  
CAAATGGGATTAGAGACCCGAGTAGTCC

>Otu16029

CCAGCCTATGGGGGGCTCCAGTGGGGAATCTTGACAATGGACGAAAGTCTGATGCAGCA  
ACGCCGCGTGGGGGATGAAGCTTCTCGGAGTGTAACCCCTTTTCGACCCGGAAGAAAGCC  
CGCAAGGGTTTGACGGTACGGGTATAAGAAGCCCCGGCTAACTACGTGCCAGCAGCCGCG  
GTAAAACGTAGGGGGCGAGCGTTGTCCGGATTTATTGGGCGTAAAGGGTTCGTAGGCGGG  
AATGCAAGTCAAGTGTGAAATCCCCAGGCTCAACCTGGGACGTGCATTTGAGACTGTGTT  
TCTTGAGTTTCGGAGAGGGTGGTGGAATTGCTGGTGTAGGAGTGACATCCGTAGAGATCA  
GCAGGAACACCGGAGGCGAAGGCGACCACCTGGCCGAATACTGACGCTGAGGAACGAAAG  
CGTGGGGAGCAAACAGGATTAGAGACCCCTCGTAGTCC

>Otu16033

GGACTACGGGGGTATCTAATCCTGTTTGCTCCCCACGCTTTCGCACATGAACGTCAGTAT  
TGGACCAGGAAGTCGCTTTTCGCCACTGGTGTTCTTCCGATATCTACGCATTTACACCGCT  
ACACCGGAAATTCACCTTCCCTCTTCCATACTCTAGCCAGGCAGTATCAAATGCAGTTCC  
CAGGTTGAGCCCAGGGATTTACATCTGACTTACCAAACCGTCTACGCGCGCTTTACGCC  
CAGTAATTCCGATTAACGCTCGCACCCCTCTGTATTACCGCGGCTGCTGGCACAGAGTTAG  
CCGGTGCTTTTTCTGTGAGTTAAATCAAGATCACGAAGTATTAATCCGTGACTTTTTTGTC

CCCACTAAAAGTGCTTTACAACCCGCAGGCCTTCTTCACACACGCGGCGTCGCTGGATCA  
GGGTTTCCCCCATTTGTCCAATATTTCCCACTGGTGCCCCCGTAGGCTGG  
>Otu16043  
CCAGCCTACGGGTGGCAGCAGTCGAGAATTTTTCACAATGGACGAAAGTCTGATGGAGCG  
ACGCCGCGTGAGGATGAAGGTTCTTGGATTGTAACTCCTGTCACTGCAGGACAAGGGT  
GCCGTATTTAAAAGATGCGGCATTTGATGGTATGCGGAGAGGAAGGGACGGCTAACTCTG  
TGCCAGCAGCCGCGGTAAGACAGAGGTCCCGAGCGTTGTTTCGGATTCATTGGGCGTAAAG  
GGTGTGTAGGAGGTCGGGTTAGTCAGGTGTGAAATCCCCCAGCTTAACTGGGAAACTGCG  
CTTGATACTGCCCGGCTAGAGGATCGGAGGGGGTAACGGAATTCATGGTGTAGCAGTGAA  
ATGCGTAGATATCATGAGGAACACCGGTGGCGAAGGCGGTTACCTGGAAGATTCTCTGACT  
CTGAAACACGAAAGCCAGGGGAGCAAACGGGATTAGAGACCCTAGTAGTCC  
>Otu16060  
CCAGCCTACGGGGGGGCAGCAGTAAGGAATATTGGTCAATGGACGCAAGTCTGAACCAGCC  
ATGCCGCGTGAGGATGAAGGCCCTCTGGGTTGTAACTTCTTTTACAGGAGAAGAAAAC  
TATGGTTTCTACTATAGCCGACGGTACCCTGGGAATAAGCACCGGCTAACTCCGTGCCAG  
CAGCCGCGGTAATACGGAGGGTGCAAGCGTTATCCGGATTTACTGGGTTTAAAGGGTGTG  
TAGGCGGGCTTTTAAAGTCAGTGGTGAATCTCCAGGCTCAACCTGGAAGCTGCCATTGAT  
ACTATTAGTCTTGAATTTTGTGAGGTAGGCGGAATAAGTCATGTAGCGGTGAAATGCAT  
AGATATGACTTAGAACACCAATTGCGAAGGCAGCTTGCTAAACAAATATTGACGCTGAGG  
CACGAAAGCGTGGGGATCAAACAGGATTAGATACCCGAGTAGTCC  
>Otu16062  
CCAGCCTACGGGTGGCACCAGCATCAACGGCCATACAAGTACCAGTTATGAATTGTGCCT  
CATTTGATGTCAAAAATGCAACCGTATTTGCGATATCCTGTGGTTTGCCAATGGAGTTGT  
TGAGTGCAGTTCGTATGGTTGCTTTTGCAGCCCATTTTCCAGCAATTCTTTTGTTATGC  
CCATAGCTGTGGCAAAGTTTGATTTCGATTCCACCAGAACTAATCTAAGAAAAATGTTTTT  
AATTTTATGAATATTGTGATAACAAAATTAGGTTTATCTTTTTTCTAAAAAATGACTTA  
TATACTTAATAGAGTTAACCCAACTGCTTTCATGGCCAAACATTTGGTAAACATATCT  
AATGCCGCTTTTGACATACAGTAAGGCATCATACTATTAATCTATGAATTAGAGACCCCC  
GTAGTCC  
>Otu16075  
CCAGCCTACGGGTGTCAGCAGTGGGGAATTTTGCGCAATGGGGGAAACCCTGACGCAGCA  
ACGCCGCGTGAAGGATGAAGGTCTTCGGATTGTAACTTCTGTCAATTAGAGAACAAGTGT  
TACCGAGTAACTACCGGTAACCTGATAGTATCTGAAGAGGAAGAGACGGCTAACTCTGTG  
CCAGCAGCCGCGGTAATACAGAGGTCTCAAGCGTTGTTTCGGATTCATTGGGCGTAAAGGG  
TGCGTAGGTGGCAAGGTAAGTTGGATGTGAAATCCCGGGGCTTAACCCCGGAACTGCATT  
CAATACTGCCCTGCTCGAGTACTGGAGAGGAGATTGGAATTTACGGTGTAGCAGTGAAAT  
GCGTAGATATCGTAAGGAAGACCGGTGGCGAAGGCGGATCTCTGGACAGTTACTGACACT  
GAGGCACGAAGGCCAGGGGAGCAAACGGGATTAGATACCCCAGTAGTCC  
>Otu16076  
CCAGCCTACGGGTGGCAGCAGTAGGGAATATTGCGCAATGGAGGAAACTCTGACGCAGCG  
ACGCCGCGTGGGTGACGAAGGCCCTTCGGGTCGTAAAGCCCTGTGGAAGGGAAGAAACAC  
GGTATGGCTAACATCCATACCGCTTGACGGTACCTTTAAAGGAAGCACCGGCTAACTACG  
TGCCAGCAGCCGCGGTAATACGTAGGGTGCAAGCGTTGTTTCGGAATCATTGGGCGTAAAG  
CGCGTGTAGGCGGTTAAGTAAGTCGGGTGTGAAATCCCTGGGCTCAACCGAGGAAGTGCA  
CTCGAACTACTTAGCTAGAGGATGGTAGAGGAAGGTGGAATTCCTAGTGTAGAGGTGAA  
ATTCGTAGATATCGGGAAGAACACCAGTGGCGAAGGCGGCCATCTGGACGACAACCTGACG  
CTGAGACGCGAAAGCGTGGGGAGCAAACAGGATTAGATACCCCTCGTAGTCC  
>Otu16077  
CCAGCCTATGGGGTGCTGCAGTAAGGAATATTGGTCAATGGGCGGAAGCCTGACGATGCG  
ACGCCGTGTGAGCGAAGAAGGCCCTAGGGTCGTAAAGCTCTTTCGCTTGGAACAAGAGA  
AGCTGGTTAACACCCGGCTGATTTGAGGGTACCAGGTAAAGAAGCACCGGCTAACTCCGT  
GCCAGCAGCTGCGGTAATACGGAGGGTGCAAGCATTAATCGGAATTATTGGGCGTAAAGG  
GCGCGTAGGCGGGGATGTAAGTCAGATGTGAAATCCCGAGGCTCAACCTCGGAACAGCAT  
TTGAAACTGCATCTCTTGAGGATAGGAGGAGAAAATGGAATTCACAAAGTAGCGGTAAAA  
TGCGTAGATATGTGGAAGAACACCAGTGGCGAAGGCGGTTTTCTATCTTATACCTGACGC  
TGAGGCGCGAAAGCAAGGGGATCAAACAGGATTAGATACCCCAGTAGTCC  
>Otu16083  
CCAGCCTACGGGTGGCAGCAGTGGGGAATATTGCGCAATGGGCGAAAGCCTGACGCAGCA

ACGCCGCGTGGGTGATGAAGGCCTTCGGGTGTAAAGCCCTGTCGCCCCGGGACGAATAAG  
TCGTCTAACAAACGACCCTGACGGTACCGGGAGAGGAAGCACC GGCTAACTCTGTGCCAG  
CAGCCGCGGTAATACAGAGGGTGCTAGCGTTGTTTCGGAATTATTGGGCGTAAAGGGCGCG  
TAGGCGGTCTCTGTGTGTCGGGTGTGAAATCCCACCTCTTAAAGGTGGAATTGCGTCCGAA  
ACTACAAGACTGGAGTGTGCGAGAGGATGGCGGAATTCCTGGTGTAGAGGTGAAATTCGT  
AGATATCAGGAGGAACACCGGTGGCGAAGGCGGCCATCTGGACGACAACCTGACGCTGAGG  
CGGAAGGCGTGGGGATCAAACAGGATTAGAAACCC CAGTAGTCC

>Otu16098

CCAGCCTATGGGTGGCTCCAGTGGGGAATATTGGACAATGGGCGCAAGCCTGATCCAGCA  
ATGCCGCGTGGGTGAAGAAGGTCTTCGGATTGTAAAGCCCTTTTGGCGGGGACGATGATG  
ACGGTACCCGCGAGAATAAGCCCCGGCTAACTTCGTGCCAGCAGCCGCGGTAATACGTAGG  
GTGCAAGCGTTGTCCGGAATTATTGGGCGTAAAGAGCGTGTAGGCGGTCCGATCAGTCCG  
CTGTGAAAGTCCAGGGCTCAACCCTGGGATGCCGGTGGATACTGTGCGACTAGAGTCCGG  
AAGAGGCGAGTGGAATTCCTGGTGTAGCGGTGAAATGCGCAGATATCAGGAGGAACACCA  
ATGGCGAAGGCAGCTCGCTGGGACGGTACTGACGCTGAGACGCGAAAGCGTGGGGAGCAA  
ACAGGATTAGATACCCTAGTAGTCC

>Otu16103

CAGCCTATGGGAGGCAGCAGTGGGGAATCTTGACACAATGGAGGAACTCTGATGCAGCGA  
CGCCGCGTGAGCGATGAAGCCCTTCGGGGTGTAAGCTCTTTTCGACGGGAACGATAATGA  
CGGTACCCGCGAGAAGAAGCTGCGGCTAACTACGTGCCAGCAGCCGCGGTAATACGTAGGC  
AGCAAGCGTTGTTTCGGAATTACTGGGCGTAAAGAGTTCGTAGGCGGTTCCTATGTTTCGG  
TGTGAAATCTCCCGGCTTAACTGGGAGGGTGCGCCGAAAACCTGGAAGGCTTGAGTATGGG  
AGAGGAAAGCGGAATTCCTGGTGTAGCGGTGAAATGCGTAGATATCGGAAGGAACACCAG  
TGGCGAAAGCGACTTCCTGGTCAATACTGACGTTTCATGTACGAAAGCTAGGGGAGCAAA  
CAGGATTAGATACCCTAGTAGTCC

>Otu16131

CCGCCTACGGGTGGCTGCAGTAGGGAATATTGGACAATGGGGGCAACCCTGATCCAGCCA  
TGCCGCGTGAATGATGAAGGCCTTCGGGTGTAAAGTTCTTTTGGTGGGGACGATGATGA  
CGGTACCCACAGAATAAGCTCCGGCTAACTTCGTGCCAGCAGCCGCGGTAATACGAAGGG  
AGCGAGCGTTGTTTCGGAATTACTGGGCGTAGAGGGTTCGTAGGCGGGAATGCAAGTCAAG  
TGTGAAATCCCCAGGCTCAACCTGGGACGTGCATTTGAGACTGTGTTTCTTGAGTTTCGG  
AGAGGGTGGTGAATTGCTGGTGTAGGAGTGACATCCGTAGAGATCAGCAGGAACACCGG  
AGGCGAAGGCGACCACCTGGCCGAATACTGACGCTGAGGAACGAAAGCGTGGAGAGCAAA  
CAGGATTAGAAACCCCGTAGTCC

>Otu16134

CAGCCTACGGGTGGCAGCAGTGGGGAATCTTGCGCAATGGGCGAAAGCCTGACGCAGCGA  
CGCCGCGTGTGCGATGAAGGTCTTCGGATCGTAAAGCACTGTCGCGAGGGAAGAAGCAAG  
TGATGGTACCTCGAGAGGAAGCACC GGCTAACTCTGTGCCAGCAGCCGCGGTAATACAGA  
GGGTGCGAGCGTTGTTTCGGAATTATTGGGCGTAAAGCGCTGGTAGGTGGCTTGAAAAGTC  
GCTTGTGAAAGCTTCCGGCTCAACCGGAAAAAGTGCGGGCGAAACTGGCAGGCTTGAGTAC  
CGGAGAGGGCCGCGGAATTCCCGGTGTAGAGGTGAAATTCGTAGATATCGGGAGGAACAC  
CAGAGGCGAAGGCGGCGGCCTGGAAGGTGACTGACACTGAGCAGCGAAAGCGTGGGGAGC  
AAACAGGATTAGAGACCCGCGTAGTCC

>Otu16141

CCAGCCTATGGGTGGCTGCAGTGGGGAATATTGGACAATGGGGGCAACCCTGATCCAGCG  
ATGCCGCGTGGGTGAAGAAGGCCTTCGGGTGTAAAGCCCTTTAAGATGGGAAGAAGCAA  
TGTGGAAGAATACGCCATGTTGTTGACGGTACCGTCAGAATAAGCACCGGCAAACTCTGT  
GCCAGCAGCCGCGGTAATACAGAGGGTGCAGCGTTAATCGGAATTACTGGGCGTAAAGG  
GCGCGTAGGCGGTTATAAGAGTGTGATGTGAAATCCCTGGGCTTAACCTAGGAAGTGCCT  
CGCAAACGATATGACTGGAGTATTGGAGAGGGTAGCGGAATTTCCGGTGTAGCGGTGAAA  
TGCGTAGAGATCGGAAGGAACGTCAATGGCGAAGGCAGCTACCTGGCCAAATACTGACGC  
TGAGGCGCGAAAGCGTGGGGAGCAAACAGGATTAGATACCCGAGTAGTCC

>Otu16143

CCAGCCTATGGGTGCGCTGCAGTGTGGAATATTGGACAATGGATTAAATTATCTGATCCAG  
TTACATCTCTCGGGTGATTGACGGCGATCGCCGTAAAACCTGTACGGCTAATAATTTTGAC  
CTTGACTATATGAAATTATGGGTATTAAATAGTCCCGGGCAACATCTGTGCCAGCAGCCG  
CGGGAATACAGAGGGGACGAGTGTTATCCATCCTAACTGGGTGTAAAGGATGCGTAGATG  
GATATTATTGATAAGATTAGAAGAAAATTACTGCTATTAGGTAGGGAATTCTAACAACGG

TTATCTAGAGATGTAAAAGGAGGTTATTAGTATACATGGTGGAGTCGATTTAGAAAAATTG  
TCGATCTCATGGGGACTACCGAGCGCGAAGGCATTTAACCGACTACAATCTGACGTTGAG  
GCATGAAATCGTGGGGAGCAAAAGGGATTAGATACCCTTG TAGTCC

>Otu16150

CCAGCCTACGGGGTGCAGCAGTGGGGAATATTGCACAATGGGCGCAAGCCTGATGCAGCG  
ACGCCGCGTGGGGGATGACGGCCTTCGGGTGTAAACCTCTTTCACCATCGACGAAGGTC  
CGGGTTTTCTCGGATTGACGGTAGGTGGAGAAGAAGCACCGGCCAACTACGTGCCAGCAG  
CCGCGGTAATACGTAGGGTGCAGCGTTGTCCGGAATTACTGGGCGTAAAGAGCTCGTAG  
GTGGTTTGTGCGCTTGTTTCGTGAAATCTCACGGCTTAACTGTGAGCGTGCGGGCGATACG  
GGCAGACTGGAGTACTGCAGGGGAGACTGGAATTCCTGGTGTAGCGGTGGAATGCGCAGA  
TATCAGGAGGAACACCGATGGCGAAGGCAGTGGGCTGGGCCGGTACTGACGCTGAGGAGC  
GAAAGCGTGGGGAGCGAACAGGATTAGATACCCGCGTAGTCC

>Otu16151

CCAGCCTATGGGTGGCAGCAGCAATCACGCTCTTATACATCAAATGCGTACACTTTCCGG  
ATAATTCACCCCATATTTTCATTGCCAAATTCACATTCTCCACCGAAGCCACCCCTCATC  
CACCAACATCCGCGCCTCCACTAAAACACTAGCAATCATCGCATCCACAACACTTTTTGC  
TTTTCTATTTGGTTGTGGTTTCTCTACTTGAGGATACGTGTAGAAGCCTCGGCCAGATTT  
CCTCCCAAGATGCCCCCTCAGCAACCAACGCGCTGAATTTCCGCCGGCCGCAACCGCTCCG  
CTCCAAGCCGAGAATACACCGATTCACTGGTCGCGAGATTACATCGAGCCCAATCAAAT  
CCATCAACTCGAACGGCCCCATTAGAAACCCTCGTAGTCC

>Otu16160

CCAGCCTTACGGGTGCGTGCAGTGGGGAATCTTGCACAATGGAGGAAACTCTGATGCAGC  
GACGCCGCGTGAGCGATGAAGCCCTTCGGGGTGTAAAGCTCTTTCGACGGGAACGATAAT  
GACGGTACCCGGAGAAGAAGCTGCGGCTAACTACGTGCCAGCAGCCGCGGTAATACGTAG  
GCAGCTAGCGTTGTTTCGGAATTACTGGGCGTAAAGGGTGCCTAGGCGGTCTGTAAAGTAT  
GGTGTGAAATCTCCCGGCTTAACTGGGAGGGTGCCTATAGACTGCGGGACTAGAGGGTG  
GGAGAGGAAAGTGGAATTCCTGGTGTAGCGGTGAAATGCGTAGATATCAGGAGGAACACC  
TGTGGTGTAGGCGGCTTTCTGGACCATTACTGACGCTGAGACACGAAAGCGTGGGTAGCA  
AACGGGATTAGAAACCCCGTAGTCC

>Otu16164

CCAGCCTATGGGGCGCTCCAGTGGTGTGTTAGGGGATTAAATAGAATTAGAGAGAATGA  
CGGCTCGAGCCTGAATAAGCTCTACAGGCTTGTGTAAGCCAACGAAGCGTGTTTTTGA  
GAAGTGGAATGAGTACTTTACCTGTTGAAACCGAGCCCTGGCCCTGGACGTCAGTTTTT  
CCCAGGCGAGCTTGCGGGTCCGGCTCGCCGATGGCCGCGAGATTTCCGTGCCGCTGGTGT  
GGTTCCTCGAGGCTTGCCAACGCGACGGCCGAGGAACGCGGCGACTATTCGCTGATCGGCG  
GAGGCACCGGCATTCACTGGCCGCTCAGCGATGAAGACTTATCGGTGCGCCGGCTTGCTGC  
GGGGCCGCGGACTCGCGATGAGCCGCGTCTTTTGAGCGACGCCAGGACTCAACACGGTT  
ACGCCCCCGTCTGTTACGCGGCGTGAAGGCCAAATTAGAGACCCTCGTAGTCC

>Otu16170

CCAGCCTATGGGGTGCTGCAGTGGGGAATATTGGACAATGGGGGAAACCCTGATCCAGCG  
ACGCCGCGTGTTGTAAGAAGGCCTGCGGGTGTAAAGCACTTTTAGTGGGGACAAAAAGC  
CACGGATTAATACTCTGTGGTCTTGATTTAACCTAAAGAAAAAGCACCGGCTAACTCTGT  
GCCAGCAGCCGCGTAATACAGAGGGTGCAGCGTTAATCGGAATTACTGGGCGTAAAGC  
GCGCGTAGACGGTTTTGTAAAGTCAGATGTGAAATCCCTGGGCTCAACCTGGGAAGTGCAT  
TTGATACTGCATGGCTAGAGTATCGAAGAGGGAAGTGGAATTTCTGTGTAGCGGTGAAA  
TGCGCAGATATCAGGAGGAACACCAGCAGCGAAGGCGGTGGTCTGGGCCGACATTGACGC  
TGAGGAGCGAAAGCGTGGGGAGCGAACAGGATTAGAAACCCAGTAGTCC

>Otu16174

CCAGCCTACGGGGGGCAGCAGTGGGGAATCTTGGACAATGGGGGCAACCCTGATCCAGCC  
ATGCCGCGTGAGTGATGAAGGCCTTCGGGTGTAAACTCTTTCGACGGGGACGATAATG  
ACGGTACCCGTAGAAGAAGCTCCGGCTAACTTCGTGCCAGCAGCCGCGGTAATACGAAGG  
GGGCTAGCGTTGCTCGGAATTACTGGGCGTAAAGCGCACGTAGGCGGCTTTCTAAGTCGG  
TGGTGAAATCCTGGAGCTCAACTCCAGAACTGCCTTCGAAACTGGAGAGCTTGAGTCCGG  
GAGGGGTGAGTGGAAGTGCAGTGTAGAGGTGAAATTCGTAGATATTCGCAAGAACACCA  
GTGGCGAAGGCGGCTCACTGGCCCGGTACTGACGCTGAGGTGCGAAAGCGTGGGGAGCAA  
ACAGGATTAGATACCCTTG TAGTCC

>Otu16175

CCAGCCTACGGGGCGCTCCAGTAGGGAATCTTCCGCAATGGGCGAAAGCCTGACGGAGCA

ATGCCGCGTGAACGATGAAGGCCTTCGGGTCGTAAAGTTCTGTTGTGGGGGAAGAAGGGG  
CGTTGCGATAATACCGCAGCGTCTTTGACGGTACTCCACGAGGAAGCCCCGGCTAATTAC  
GTGCCAGCAGCCGCGGTAATACGTAAGGGGCAAGCGTTGTCCGGAATCACTGGGCGTAAA  
GCGCACGTAGGCGGTGCAGCAAGTCAGGGGTGCAAGCTCCAGGCCTAACCTGGGAATTGC  
CTCTGAAACTACTGTGCTTGAGGGTCAGAGGGGAACTGGAATTCACGGTGTAGCGGTGA  
AATGCGTAGATATCGTGAGAACACCCGTGGCGTAGGCGGGTTTCTGGCTGACAACTGAC  
GCTGAGGTGCGAAAGCTAGGGGAGCGAACGGGATTAGATCCCCCGTAGTCC

>Otu16186

CCAGCCTATGGGTGGCTGCAGTGGGGAATCTTGGGCAATGGGCGAAAGCTTGACCCTAAT  
ATATCGCGTGAGTGAAATTTTAATATTGTTGAGTGAAATGCTTGATCGACAGTTAACTCT  
GTAAACTCGTTTAACGGTGAGAATAATGATATTAACCGAATTAGTTTTTAATAACTAAT  
TAGCAACCCTGACTAACTTCGTGCCAGCAGTCGCGGTGAAACGGGGAGGGTGAGTGT  
TTGTATTGACTGGGCGTAAAGCGTGCGTAGAAGGTTAAATAAGTTCAAATCTAAATTTTT  
AATTGGTATAATTAAGATCTTTTTGAAAACCTTTTACTAGAGTTACTTGGAATTTATA  
GATTCTACGGTGAGGGGTGAAATCCGACAATATCTATGGGGCTAACAAAGATGGAAATA  
ATAATTTATTTGTAAGTACTTTGAGGCACTAAAGCGTGGGGATCGAATGGGATTAGATA  
CCCCTGTAGTCC

>Otu16204

CCAGCCTACGGGGGGCACCAGTGGGGAATATTGGACAATGAGGGAAACCTGATCCAGCG  
ACGCCGCGTGAGTGAAGAAGGCCTGCGGGTTGTAAAGCACTTTCGGAGGGGAGGAAGGCA  
TTTTGTCTGAATAGGCGAAATGATTGACGTTACCTTCAGAAGAAGCACCGGCTAACTCTGT  
GCCAGCAGCCGCGGTAATACAGAGGGTGCAAGCGTTAATCGGAATTACTGGGCGTAAAGG  
GTGCGTAGGTGGATAAATAAGTTAGACGTGAAAGCCCCGGGCTCAACCTGGGATGGTCGT  
CTAATACTGTTTATCTAGAGTATGGTAGAGGGTGGTAGAATTTCCGGTGATAGCGGTGAAA  
TGCGTAGATATCGGAAGGAATATCAATGGCGAAGGCAGCCACCTGGGCTAATACTGGCAC  
TGAGGCACGAAAGCATGGGGAGCAAACAGGATTAGAGACCCTAGTAGTCC

>Otu16205

CCAGCCTACGGGGTGACAGCAGTGGGGAATCTTGCGCAATGGACGAAAGTCTGACGCAGCC  
ACGCCGCGTGAGTGAAGAAGGCCTTCGGGTTGTAAAGCTCTGTGAGCGGGACGAAAAGC  
TTTAGGGTGAATAGCCTTAGAGTCTGACGGTACCGCTAAAGGAAGCACCGGCTAACTTCG  
TGCCAGCAGCCGCGGTAATACGAGGGGTGCAAGCGTTGCTCGGAATTATTGGGCGTAAAG  
GGTAGGTAGGTGGTCTCATTTGTCTGGGGTGAAAGCCTTGAGCTTAAGTCAAGAAGTGCC  
CCAGAAACGGTGAGACTCGAGTACTGGAGAGGTGAGTGAATTTCCCGGTGTAGCGGTGAA  
ATGCGTAGAGATCGGGAGGAACACCAGAGGCGAAGGCGGCTCACTGGACAGTCACTGACA  
CTCAACTACGAAAGCGTGGGGAGCAAACAGGATTAGATACCCTTGATAGTCC

>Otu16206

CCAGCCTACGGGTTGCTCCAGACGAGAATATTCCGCAATGGACGAAAGTCTGACGGAGCG  
ACGCCGCGTGATTGATGAAGTGCTTCGGTACGTAAAGATCTTTTATCGGGGACGAAGTTT  
ATTGACGGTACCCGATGAATAAGGGGCTCCTAACTCTGTGCCAGCAGGAGCGGTAATACA  
GAGGCCCAAGCATTATCCGGAATCACTGGGCGTAAAGGGTGTGTAGGCGGTGCTATTAG  
TCTTTCGTGAAAAGATCTCGGGCTTAACCCGGGAGACGCGGAGGAAACGGTACGACTTCGA  
GGATGCGAGAGGTATAGGGAACCTCATGGTGTAGGGGTGAAATCCGTTGATATCATGGGGA  
ACACCAAATGCGAAGGCACTATACTGGCGCACTCCTGACGCTGAAACACGAAAGCGTGGG  
AATCGAAAAGGATTAGAAACCCGAGTAGTCC

>Otu16211

CCAGCCTACGGGGGGCTCCAGTCGAGAATTTTTCTCAGTGGGGGCAACCCTGAAGGGGCG  
ACGCCGCGTGAGGATGAAGGTCTTCGGATTGTAAACTCCTGTCATGAGGGAACAACTT  
ACGCGTTTAACTGATGCGTGACTGATAGTACCTCAAGAGGAAGAGACGGCTAACTCTGTG  
CCAGCAGCCGCGGTAATACAGAGGTCTCAAGCGTTGTTTCGGATTCAATTGGGCGTAAAGGG  
TGCGTAGGCGGCGAAGCAAGTCAGGTGTGAAATCCCGGGGCTCAACCCGGAAGTGCCT  
TGATACTGCTTTGCTCGAGGACTGGAGAGGAGATCGGAATTCACGGTGTAGCAGTGAAAT  
GCGTAGATATCGTGAGGAAGGCCAGTGGCGAAGGCGGATCTCTGGACAGTTCTTGACGCT  
GAGGCACGAAGGCCAGGGGAGCAAACGGGATTAGATACCCTAGTAGTCC

>Otu16219

CCAGCCTACGGGGTGACAGCAGTAGGGAATCTTGCGCAATGGGCGAAAGCCTGACGCAGCA  
ACGCCGCGTGAGGGATGACGGCCTTCGGGTTGTAAACCTCTTTCAAGCAGGGACGATAAT  
GACGGTACTTGCAGAAGAAGCTCCGGCCAACCTACGTGCCAGCAGCCGCGGTAATACGTAG  
GGAGCGAGCGTTGTCCGGAATCACTGGGCGTAAAGGGTTCGTAGGCGGGAATGCAAGTCA

AGTGTGAAATCCCCAGGCTCAACCTGGGACGTGCATTTGAGACTGTGTTTCTTGAGTTTC  
GGAGAGGGTGGTGGAAATTGCTGGTGTAGGAGTGACATCCGTAGAGATCAGCAGGAACACC  
GGAGGCGAAGGCGACCACCTGGCCGAATACTGACGCTGAGGAACGAAAGCGTGGGGAGCA  
AACAGGATTAGAAACCCGTGTAGTCC

>Otu16223

CTAGCCTACGGGGGGCTGCAGTCGAGAATCTTTTCGCAATGGGCGAAAGCCTGACGAAGCG  
ACGCCGTGTGAGCGAAGAAGGCCTTCGGGTGTAAAGCTCTTTCGCTTGGGAACAAGAAA  
TACGGGATAATACCCCGTAAATTTGAGGGTACCAGGTAAAGAAGCACCGGCTAACTCCGT  
GCCAGCAGCTGCGGTAATACGGAGGGTGCAAGCATTGATCGGAATTACTGGGTGTAAAGG  
GCGCGTAGGCGGTTTGTAAAGTCAGATGTGAAATTCGCGGGCTCAACTGCGGAGCTGCAT  
TTGAAACTGGCAAAGTAGAGGATAGTTAGGGAAAACGGGATTCCACGTGTAGCGGTGAAA  
TGCGTAGATATGTGGAAGAACGCCAGTGGTGAAGACGGTTTTCTGGGCTATAACTGACGC  
TGAGGCGCGAAAGCAAGGGGAGCAAACAGGATTAGATACCCAGTAGTCC

>Otu16244

CCAGCCTATGGGGGGCACCAGTCGAGAATTTTTTCACAATGGACGAAAGTCTGAAGGAGCG  
ACGCCGCGTGGAGGATGAAGGTTCTTGATTGTAAACTCCTGTCACTGCAGAACAAGGAT  
ACGCCAGTTAACAGCCGGCGTATTTGATGGTATGCGGAGAGGAAGGGACGGCTAACTCTG  
TGCCAGCAGCCGCGGTAAGACAGAGGTCCCGAGCGTTGTTTCGGATTCAATTGAGCGTAAAG  
GGTGTGTAGGAGGTCGGGTAAGTCAGGTGTGAAATCTCAGAGCTTAAGTCTGAAACTGCG  
CTTGATACTGCTCGGCTAGAGGATCGGAGGGGGTAACGGAATTTATGGTGTAGCAGTGAA  
ATGCGTAGATATCATAAGGAACACCGGTGGCGTAGGCGGTTACCTGGAAGATTCTTGACT  
CTGAAGCACGAAAGCCAGGGGAGCAAACGGGATTAGATACCCTAGTAGTCC

>Otu16254

CCAGCCTATGGGTGGCAGCAGTGGGGAATATTGGACAATGGGGGAAACCCTGATCCAGCC  
ATGCCGCGTGAAATGATGAAGGCCTTCGGGTGTAAAGTCCTTTTGACGGGGACGATGATG  
ACGGTACCCGTAGAATAAGCTCCGGCTAACTTCGTGCCAGCAGCCGCGGTAATACGAAGG  
GAGCTAGCGTTGTTTCGGAATTACTGGGCGTAAAGGGCGCGTAGGCGGTTTGACAAGTTGG  
ATGTGAAAGCCCTGGGCTCAACCCGGGAATTGCATTCAAGACTGTCTTTCTTGAATTCGG  
TAGAGGTTGGTAGAATTTCCAGTGTAGAGGTGAAATTCGTAGAGATTGGGAAGAATACCG  
GTGGCGAAGGCGGCTCACTGGACCGATACTGACGCTGAGGCGCGGAAGCGTGGGGAGCAA  
ACAGGATTAGATACCCGTGAGTCC

>Otu16256

CCAGCCTATGGGTGGCAGCAGGCGAGAATATTCCACAATGGACGCAAGTCTGATGGAGCG  
ACGCCGCGTGATGGATGAAGTGCTTCGGTACGTAAACATCTTTTATCGGGGAAGAAATAA  
GTGACGGTACCCGATGAATAAGGGGCTCCTAACTCTGTGCCAGCAGGAGCGGTAATACAG  
AGGCCCCGAGCGTTACCCGGAATCACTGGGCGTAAAGGGTGTCTAGGCGGGCATGTTAGT  
CTCTCGTAAAATCTATGGGCTCAACCTATAGCTCGCGAGGGAAACGGCATGTCTAGAGGG  
CGCGAGAGGTAGAGGGAACACGGTGGAGGGGTGAAATCCGTTGATATCGTGGGGAACA  
CCAAAGGCGAAGGCACTCTACTAGCGCGTTCCTGACGCTCAAACACGGAAGCCAGGGGAG  
CGAACGGGATTAGAGACCCTCGTAGTCC

>Otu16257

CCAGCCTATGGGGCGCAGCAGTGGGGAATATTGGACAATGGGGGCAACCCTGATCCAGCA  
ATACCGCGTGTGTGAAGAAGGCCTTCGGGTGTAAAGCACTTTAGGTTGGGAAGAAGATG  
TATTGTTTAAAGAGATGATACATTTGACTGTACCGACAGAATAAGCACCGGCTAACTCTGT  
GCCAGCAGCCACGTAATACAGAGGGTGCAAGCGTTAATCGGAGTTACTGGGCGTAAAGG  
GCGCGTAGGCGGTTGAATAAGTGAGATGTGAAATCCCTGGGCTTAACCTAGGAAGTGCAT  
CTTATACTGTTTACTGGAGTACTGTAGAGGGTAGTGGAATTTCCGGTGTAGCGGTGAAA  
TGCGTAGAGATCGGAAGGAACACCAAGTGGCGAAGGCGGCTACCTGGACAGATACTGACGC  
TGAGGCGCGAAAGCGTGGGGAGCAAACAGGATTAGATACCCGTGTAGTCC

>Otu16265

CCAGCCTACGGGGGGCACCAGTCGAGAATTTTTTCACAATGGGCGAAAGCCTGATGGAGCG  
ACGCCGCGTGGGGGATGAATGGCTTCGGCCCGTAAACCCCTGTCATTTGCGAACAACCT  
ATTCACCTAACACGTGAGGAGCTGATTGTAGCGGAAGAGGAAGGGACGGCTAACTCTGTG  
CCAGCAGCCGCGGTAATACAGAGGTCCCAAGCGTTGTTTCGGATTCACTGGGCGTAAAGGG  
TGCGTAGGTGGTCAGGTAAGTCTGATGTGAAATCCCGAAGCCTAACTTCGGAAGTGCATT  
GGATACTATCTGGCTAGAGGAATGGAGGGGAGACTGGAATGCTCGGTGTAGCAGTGAAAT  
GCGTAGATATCAAGTGGAACACCAAGTGGCGAAGGCGAGTCCCTGGACAACCTCTGACACT  
GAGGCACGAAAGCTAGGGGAGCAAACAGGATTAGAGACCCTAGTAGTCC



>Otu16274

CCAGCCTACGGGGGGCTCCAGTCGAGAATCATTCGCAATGGGCGAAAGCCTGACGATGCG  
ACGCCGTGTGTATGAAGAAGGCCTTCGGGTGTAAAGTACTTTTCGCCTGGGAACAAGGGA  
GACATACTAATACTGTGTCAACTTGAGGGTACCAGGTAAAGAAGCACCGGCTAACTCCGT  
GCCAGCAGCTGCGGTAATACGGAGGGTGCAAGCATTAATCGGATTTATTGGGCGTAAAGG  
GCGCGTAGGCCGGAGAGAAAGTCAGATGTGAAATCCTGGGGCTCAACCTCAGAACAGCAT  
TTGAAACTCCTCTTCTAGAGGGTAGGCGGAGAAAACGGAATTCACAAGTAGCGGTGAAA  
TGCGTAGATATGTGGAAGAACACCGGTGGCGAAGGCGGTTTTCTAGCTTACTCCTGACGC  
TGAGGCGCGAAAGCAAGGGGATCAAACAGGATTAGATAACCCGTGTAGTCC

>Otu16279

CCAGCCTACGGGAGGCAGCAGTGGGGAATCTTGCGCAATGGACGAAAGTCTGACGCAGCC  
ACGCCGCGTGAGTGAAGAAGGCCTTCGGGTGTAAAGCTCTGTGCGAGGGGACGAAAAGC  
TAGTGGGTAAACAGCCTATTAGCCTGACGGTACCCTTAAAGGAAGCACCGGCTAACTTCG  
TGCCAGCAGCCGCGGTAATACGAGGGGTGCAAGCGTTGCTCGGAATTATTGGGCGTAAAG  
GGCAGGTAGGTGGTCTTATTTGTCTGGGGTGAAGCCTTGAGCTTAACTCAAGAAGTGCC  
CCAGAAACGGTAAGACTAGAGTCTTGAGAGGGTTCGTGGAATTCCTGGGTGTAGCGGTGAA  
ATGCGTAGAGATCGGGAGGAACACCAGAGGCGAAGGCGGCGACCTGGACAAGTACTGACA  
CTCAACTGCGAAAGCGTGGGGAGCAAACAGGATTAGAAACCCCCGTAGTCC

>Otu16287

CCAGCCTATGGGTTCGAGCAGTGGGGAATCTTGCAACAATGGGCGAAAGCCTGATGCAGCA  
ATGCCGCGTGAGTGATGAAGGCCTTCGGGTGTAAATCTCTGTGCGATGGGACAAACGGG  
TTTATGGTTAATAACCATAGACAGTGATGGTACCATTAAAGGAAGAGGCGGCTAATTCTG  
TGCCAGCAGCCGCGGTAATACAGAAGCCTCGAGCGTTGTTTCGGAATTACTGGGCGTAAAG  
GGAATGTAGGTGGTGACGTAAGTCAGATGTGAAAGCCCTGGGCTTAACCCGGGAAGTGCA  
TTTGATGCTGCGTTGCTAGAGTGCGAGAGAGGAAAGTGGAATTCCTGGGTGTAGGGGTGAA  
ATCCGTAGATATCGGGAGGAATACCAATGGCGAAGGCAGCTTTCTGGCTCGTAACTGACA  
CTGAGATTGCGAAAGCGTGGGTAGCAAACAGGATTAGATAACCCTAGTAGTCC

>Otu16288

CCAGCCTACGGGGCGCTGCAGTTCAGGCCGTTGGCGTTGGCGACATCTTCGACGATCCAG  
TATTTCAATTTGTCTTGCGGCGACGACGCGATATCGACCGCTTTGTGCGCCGACCGCGTAA  
CTGCAGAGAATTCCTTCTTGAACCTTCTTGCCGTTCTTGCCGTTCTGTCCAAAGGTGCTG  
TCGAAGCAGAAATCCGAGGCGAGGTTGGTACAGACGGAATAACCGCCGGATTCTGGCTCG  
GGCCAAAAGCGCTCGGAACACAAAACCGCGTTTTTGGTGATGCGGGCGTATTGCAGTTGC  
GCGGCGGCTTCCAAATGATTGGTGGGAGGATTCTTTTTCCCCCAATCAATATCGATCATG  
CAGTGCGCTGGGATGGCACAAATGCAATAGTCGGCAACGATCGGCGCGCCAGCGCCTTCC  
ACTTGGACGTGGACGCGCTGATTAGAAACCCTTGTAGTCC

>Otu16290

CCAGCCTATGGGAGGCAGCAGTGGGGAATCTTGCGCAATGGGCGAAAGCCTGACGCAGCG  
ACGCCGCGTGAGTGATGAAGGCCTTCGGGTGTAAAGCTCTGTGGGGCGAGACGAATAAG  
TAGAAGCGAATACCTTCTATGATGACGGTATCGCCTTAGCAAGCACCGGCTAACTCTGTG  
CCAGCAGCCGCGGTAAGACAGAGGGTGCAAACGTTGTTTCGGAATTACTGGGCGTAAAGCG  
AGTGTAGGCGGTCTCTAAGTCGGGTGTGAAAGCCCCGGGCTCAACCCGGGAAGTGCACT  
CGAAACTGGAGGGCTAGAGTATCGGAGAGGTTGGTGGAATTCCTCGGTGTAGAGGTGAAAT  
TCGTAGATATCGAGAGGAACACCGGTGGCGAAGGCGGCCAACTGGACGAATACTGACGCT  
GAGACTCGAAAGCGTGGGGAGCAAACAGGATTAGAAACCCTAGTAGTCC

>Otu16311

CCAGCCTACGGGTTCGAGCAGCAGGTATTGTTGGCGGTGGCGGTGTAGGATCAGCAGCAG  
CTAGAACTCTTGGTGGCGGGGCTATTGGTGGCTTAGCTGGAGGTTTAGCAACTGGTACTA  
CTAGTGGTGCTAATAAGGGAGCTTTATTAGGAGCAGGATTAGGTGCAGTTAGCTCTATTC  
CATTAGTTAATAGATTCTTACCAGATGCACTACCAGCAGGTGGCGGAGGCATGGCTCAAT  
TTATGGCTAATGCTGCTGGAGATGATACAGTAACTCAAGCTGGTCGTGACAGAATATTCC  
AAGATTTAGCAACTACTTCACAAAATGCAGCACGTAATGTTCAAAGCCAATTACAGGGCC  
AAGTAGCTGATGCAACTAAAGGTCAAGTTGGTAACGTACAGACTTCGTAGCTAATCTCT  
ATAATATTAGATAACCCTAGTAGTCC

>Otu16318

CCAGCCTATGGGTTCGAGCAGTGGGGAATATTGGACAATGGGGGAAACCCTGATCCAGCG  
ACGCCGCGTGTTGAAGAAGGCCTGCGGGTGTAAAGCACTTTTAGTGGGGACAAAAAGC  
CATGGATTAATACTTCGTGGTCTTGATTTAACCCAAAGAAAAAGCACCGGCTAACTCTGT

GCCAGCAGCCGCGGTAATACAGAGGGTGCAGAGCGTTAATCGGAATTATTGGGCGTAAAGG  
GTGCGTAGGCGGTGCCACAAGTCACCTTGTGAAATCCCCAGGCTTAACCTGGGGCCTGCAG  
GCGAAACTGTGGTGCTGGAGTATGGGAGAGGTGCGTGGAATTCCTGGTGTAGCGGTGAAA  
TGCGTAGATATCGGGAGGAACACCTATGGCGAAAGCGGCGCACTGGACCATAACTGACGC  
TGATGCACGAAAGCTGGGGGAGCAAACAGGATTAGAAACCCCCGTAGTCC

>Otu16325

CAGCCTATGGGTGGCACCAGTAGGGAATTTTCCACAATGGACGAAAGTCTGATGGAGCAA  
CGCCGCGTGCAGGATGAATGTCTTCGGATTGTAAACTGCTTTTATCTGTGACGAATATGA  
CGGTAGCAGATGAATAAGGATCGGCTAACTCCGTGCCAGCAGCCGCGGTCATACGGAGGA  
TCCAAGCGTTGTCCGGAATTACTGGGCGTAAAGAGTTGCGTAGGTGGCATTGTAAGTAGG  
TAGTGAAATCGTGTGGCTCAACCATATACACATTACCTAAACTGCAAAGCTAGAGGATGA  
GAGAGGTTATTGGAATTCAGTGTAGGAGTGAAATCCGTAGATATTGGGAGGAACACCG  
ATGGCGTAGGCAGATAACTGGCTCATTCTGACACTAAGGCACGAAAGCGTGGGGAGCAA  
AAGGGATTAGAAACCCTTGTAGTCC

>Otu16326

CCAGCCTATGGGGGGCTGCAGTCGAGAATCATTCGCGATGGGCGAAAGCCTGACGATGCG  
ACGCCGTGTGAGCGATGAAGGCCTTTGGGTGTAAAGCTCTTTCGCCTGGGAACAAGAGA  
GGAGGACGAATAGTCCTTCAATTTGAGGGTACCAGGTAAAGAAGCACCGGCTAACTCCGT  
GCCAGCAGCTGCGGTAATACGGAGGGTGCAAGCATTAAATCGGATTTATTGGGCGTAAAGG  
GCGCGTAGGCTGAATGGTAAGTCAGATGTGAAATTCGGAAGCTCAACTTCGGAGCTGCAT  
TTGAAACTGCCAATCTAGAGGATAGGCGGAGAAAACGGAATTCACATGTAGCGGTGAAA  
TGCGTAGATATGTGGAAGAACACCTGTGGCGAAAGCGGTTTTCTAGCTTATAACTGACGC  
TGAGGCGCGAAAGCAAGGGGAGCAAACAGGATTAGAAACCCGAGTAGTCC

>Otu16343

CCAGCCTATGGGTGCGCAGCAGTGGGGAATTTTGCGCAATGGGGGAAACCCTGACGCAGCA  
ACGCCGCGTGAGGATGAAGCCCCTTGGGGTGTAAACTCCTTTCGATAGGGAAGATAATG  
ACGGTACCTATAGAAGAAGCCCCGGCTAACTTCGTGCCAGCAGCCGCGGTAATACAGAGG  
GTGCGAGCGTTAATCGGAATTACTGGGCGTAAAGCGCGCGTAGACGGTTTTGTAAAGTCAG  
ATGTGAAATCCCTGGGCTCAACCTGGGAACTGCATTTGAAACTGCATGGCTAGAGTATGG  
TAGAGGGAAGTGGAATTTCCGGTGTAGCGGTGAAATGCGTAGATATCGGAAGGAACACCA  
GTGGCGAAAGCGACTTCCTGGACCAATACTGACGTTTCATGTGCGAAAGCGTGGGGAGCAA  
ACAGGATTAGAAACCCTAGTAGTCC

>Otu16344

CCAGCCTATGGGGTGTGTCAGCCGAGGATCCTTGGCAATGGGCGCAAGCCTGACCAAGCG  
ACGCCGCGCGTGCGATGAAGGCCTTCGGGTGTAAAGCACTGTGAGGGGGAGGAAAGCC  
GCAAGGTTTGACCTATCCCTGGAGGAAGCACGGGCTAAGTTCGTGCCAGCAGCCGCGGTA  
AGACGAACCGTGCGAACGTTGTTTCGATTCACTGGGCTTAAAGGGCGCGTAGGCGGGTTC  
TCAAGTCCGGGGTGAATCCTCTCGCTTAACGAGAGAACTGCCCCGGATACTGGGGACCT  
CGAGGGAGGTAGGGGCATGTGGAACCTCCGGTGGAGCGGTGAAATGCGTAGATATCGGAA  
GGAACGCCGCTGGCGAAAGCGACGTGCTGGACCTCATCTGACGCTGAGGCGCGAAAGCGT  
GGGGAGCAAACAGGATTAGAAACCCTTGTAGTCC

>Otu16350

CCAGCCTATGGGAGGCAGCAGTAAGGAATCTTCCACAATGGACGGAAGTCTGATGGAGCA  
ACACCGCGTGCAGGATGAAGGCTTTCGGGTGCGAAACTGCTTTTATAGATGAAGATTATG  
ACGGTAATCTATGAATAAGGACCGGCTAACTACGTGCCAGCAGCCGCGGTAATACGTAGG  
GTCCAAGCGTTATCCGGAATCACTGGGCGTAAAGCGTGCGTAGGCGGCGTGTAAAGTGTG  
ATGTTAAATCGTGTGGCTCAACCATATCGATGCATCGCATACTGGCATGCTTGAGGAAGG  
CGGAGGCAAGTGGAAGTAGTAGTGTAGCAGTGAAATGCGTAGAGATTACTAAGAACACCA  
ATGGCGAAGGCAGCTTGCTGGGCCTTTTCTGACGCTGATGTACGAAAGCGTGGGGAGCGA  
ACAGGATTAGAAACCCGTGTAGTCC

>Otu16370

CCAGCCTATGGGGGGCAGCAGTAGGGAATCTTGCGCAATGGGCGAAAGCCTGACGCAGCC  
ATGCCGCGTGAATGATGAAGGCTTTAGGATTGTAAATTCCTTTCAGCAGGGAAGATAATG  
ACTGTACCTGCAGAAGAAGCCCCGGCTGACTTCGTGCCAGCAGCCGCGGTAATACGTAGG  
CAGCAAGCGTTGTTCCGGAATTACTGGGCGTAAAGAGTGTGTAGGCGGTGTTCTAAGTCTG  
TTGTGAAATCTCCCGGCTCAACTGGGAGGGTGCGGCGGAGACTGGAATGCTAGAGTATGG  
GAGAGGTAAGCGGAATTCCTGGTGTAGCGGTGAAATGCGTAGATATCAGGAGGAACACCT  
GTGGTGTAGACAGCTTACTGGACCATGACTGACGCTGAGACACGAAAGCGTGGGTAGCAA

ACAGGATTAGAAACCCCCGTAGTCC

>Otu16387

CCAGCCTATGGGTGGCAGCAGTCGAGAATTTTTCTCAATGGGCGAAAGCCTGAAGGAGCG  
ACGCCGCGTGGGGGATGAATGGCTTCGGCCCGTAAACCCCTGTCATTTGCGAACAAATTA  
TTTTACCTAACACGTAAAGTATTGATTGTAGCGGAAGAGGAAGGGACGGCTAACTCTGTG  
CCAGCAGCCGCGGTAATACAGAGGTCCCAAGCGTTGTTTCGGAATTACTGGGCGTAAAGCG  
CGCGCAGGCGGTTTTCCAAGTCAGTGGTGAAAGCCCGGAGCTCAACTCCGGAAGTGCAT  
TGAAACTGTTAAACTTGAGGACGAGAGAGGTGAGTGGAATTCACAGTGTAGAGGTGAAAT  
TCGTAGATATTCGGAAGAACACCAGTGGCGAAGGCGACACACTGGCTCATTACTGACGCT  
GAGGCTCGAAAGCGTGGGGAGCAAACAGGATTAGATACCCGAGTAGTCC

>Otu16394

CCAGCCTATGGGGTGCTCCAGTGGGGAATATTGGACAATGGAGGAAACTCTGATCCAGAG  
ACACCGCGTGAGTGATGAAGGCCTTAATTGGTTGTAAAGCTCTTTTAGTAAAAGAAATGA  
TGATTTTTTACAGAAAAAGTACCGGCTAACTCTGTGCCAGCAGCCGCGGTAATACAGAGG  
GTGCAAGCGTTGTTTCGGAATTACTGGGCGTAAAGCGCATGTAGGCGGTAATGTAAGTTTG  
ATGTGAAAGTTTGGGGCTCAACCCCAAAATGCCATTGAATACTGCAATACTAGAGATCGG  
GAGAGGTAAATGGAATTCCTAGTGATAGAGGTAAAATTTGTTAATATTAGGAGGAACACC  
AGAGACGAAAGTGATTTACTAGAACGAATCTGACGCTGAGATGCTAAAGCGTGGGGAGCA  
AACAGGATTAGATACCCCTGTAGTCC

>Otu16395

CCAGCCTATGGGAGGCAGCAGTGAGGAATTTCCGCAATGGGGGAAACCTGACGCAGCA  
ACGCCGCGTGAGTGATGAAGGTCTTCGGATCGTAAAGCTCTGTCTGTTAGGAAAGATGGTG  
CAACTGGCTAATATCCAGATGTGCTGACGGTACCTAAAAAGGAAGCACCGGCTAACTCTG  
TGCCAGCAGCCGCGGTAATACAGAGGGTGCAAGCGTTGTTTCGGAATCATTTGGGCGTAAAG  
GGCGCGTAGGCGGCCAGGTAAGTCAATGTGAAAGCCAGGGCTCAACCTTGGAAGTGCA  
TCCGATACTGCTTGGCTTGAACTCTCGGAGAGGGTGGTGGAATTCACAGTGTAGAGGTGAA  
ATTCGTAGATATTTGGGAGGAACACCGGTGGCGAAGGCGACCGCCTGGACGAAGATTGACG  
CTGAGGCGCGAGAGCGTGGGGAGCAAACAGGATTAGAAACCCTAGTAGTCC

>Otu16416

CCAGCCTATGGGGGGCAGCAGTAGGGAATCTTCCGCAATGGATGAAAGTCTGACGGAGCA  
ACGCCGCGTGAGTGATGAAGGTTTTTCGGATCGTAAAGCTCTGTTGCCAGGGAAGAATGCT  
ATGGAGAGTAACTGCTCCATAGGTGACGGTACCTGAGAAGAAAGCCCCGGCTAACTACGT  
GCCAGCAGCCGCGGTAATACGTAGGGGGCAAGCGTCGTCCGGAATTATTGGGCGTAAAGC  
GCGCGCAGGCGGTCAATTAAGTTTGGTGTTAAGGCTGAGGCTCAACCTCAGTTTCGCACT  
GAAAAGTGGTTGACTTGAGTACAGAAGAGGAAAGTGGAATTCACAGTGTAGCGGTGAAAT  
GCGTAGATATGTGGAGGAACACCAGTGGCGAAGGCGACTTTCTGGGCTGTAAGTACGCT  
GAGGCGCGAAAGTGTGGGTAGCAAACAGGATTAGATACCCCTGTAGTCC

>Otu16420

CCAGCCTATGGGGGGCAGCAGTAGGGAATCTTGCGCAATGGGCGAAAGCCTGACGCAGCC  
ACGCCGCGTGAGTGAAAGAAGGCCTTCGGGTTGTAAAGCTCTGTCTGGGAGGGACGAACATG  
GTTTGGGTTAACAGCCCAGATCACTGACGGTACCTCCAAAGGAAGCACCGGCTAACTTCG  
TGCCAGCAGCCGCGGTAATACGAGGGGTGCAAGCGTTGCTCGGAATCATTTGGGCGTAAAG  
GGTAGGTAGGTGGTCCCGTTTTGTCAGGGGTGAAAGCCTTGAGCTTAACTCAAGAAGTGCC  
CCTGAAACGGCGGGACTCGAGTCTTGAGAGAGGTGCTGGAATTCACCGGTGTAGCGGTGAA  
ATGCGTAGAGATCGGGAGGAACACCAGAGGCGAAGGCGGCGACCTGGACAAGTACTGACA  
CTCAACTACGAAAGCGTGGGGAGCAAACAGGATTAGATACCCCTGTAGTCC

>Otu16425

CAGCCTATGGGTGGCTGCAGTGGAGAATATTAGTCAATGAACGAAAGTTTGAAGTAGCAT  
TTTGCGGGAATGAAGGATTCATAGAATCGTGAAGGCTAAGAGAGCTGTAAAGTTTCGTGCG  
CAAATTAAGATCATGATCTTATATTTGAAGAGAACCTCGGGCCAACAACGTGCCAGCAGC  
TGCGGTAAGACGTTGACGAGGAAGCGTTACTGGCCGTTACTAGGCGTAAAGAATGGCTAG  
ATTGTTTAAAGATTTAAATTAAGATCATAGAGTAGACGAAGACAATTTTAAACCTTAA  
TACTAGAAGACAAAAGAGGTAAAGCGATGAGTATAATTTAGAGATGAAATTCAAAGAAAT  
ATAAAGATCTCTGAAGCCGCGGCGGCTTTCCATTTTGATCTTGACATTAAACCATTGAA  
GTACGAGTATCGACCAGGATTAGATACCCGAGTAGTCC

>Otu16434

CCAGCCTACGGGTGGCACCAGGAACTGCCAGGCCTGCTCGCCTTTTCCGCTCTTGTTGGC  
GATCTCCCAATCGCCGTCGATCGAAGGCGCATTTGGCGGAAGGAGGCGGCGGAGCCGTATG

CGGCACCGCGCTGAATCCGTAATTGCCGCGAGTGGTGTGAAAGGTTCCCTGCAAACGGCC  
GTCTTTGAAGTTCGCCTCGAGCTTGCCGGAGGTGTACTCGTAATTCAACACCAGCGAACC  
GTTGGAGAACTACCGGAGGTGGAAGGATACAGCTCCTCACCGTTAAAGAATGTTCCCTG  
AACGGTAGATCCTTGCTGGGTCTCTGGAAGCGGCACGGAACGTCGACGCCGTTGGCTTT  
GACAGTGGCGTCCCATTCGCCGGCCAGGGACTGCGCCCAAGCGCCGGTGGAATAAGCAG  
AACACTGGTGATTAGAAACCCCTGTAGTCC

>Otu16439

CCAGCCTATGGGTGGCACCAGGGAATTTTCCACAATGGGCGAAAGCCTGATGGAGCAACG  
CCGCGTGCAGGATGAAGGCCTTCGGGTGTAAACTGCTTTTATCTGTGACGATTATGACG  
GTAGCAGATGAATAAGGATCGGCTAACTCCGTGCCAGCAGCCGCGGTACATACGGAGGATC  
CAAGCGTTATCCGGAATTACTGGGCGTAAAGAGTTGCGTAGGTGGCAGTGTAAGCAGATA  
GTGAAAGCCTGGGGCTCAACCCCTTACACATTATCTGAACTGCACAGCTAGAGGACGAGA  
GAGGTTATTGGAATTCCTAGTGTAGGAGTGAAATCCGTAGATATTAGGAGGAACACCGAT  
GGCGTAGGCAGATAACTGGCTCGTTCCTGACACTAAGGCACGAAAGCGTGGGTAGCAAAC  
AGGATTAGATACCCGAGTAGTCC

>Otu16441

CCAGCCTATGGGAGGCTCCAGTCGAGAATATTGGACAGTGGGGGAAACCTTGATCCAGAG  
ATGCCGTGTGAGCGATGAAGGCCTTCGGGTGTAAAGCTCTGTCTCGGGGACTAAAAAT  
GAATGTACCCGAAGAGGAAGTACCGGCTAACTCTGTGCCAGCAGCCGCGGTAATACAGAG  
GGTACTAATGTTGTTTCGGAATTATTGGGCATAAAGGGTGCCTAGGCGGTTTTTTAAGTCA  
ATTGCGAAATTCTGGAGCTTAACCTCAGCGCTGTAATTGATACTGGGAACTAGAGTGTG  
GGAGAGGTAAATGGAATTTGTCTCGAGGGGTAAATCCGTAGACATGACAGAGAACGCC  
AGAAGCGAAAGCGATTTACTGGAACACTACTGACGCTGAGGCACGAAAGCGCGGGGAGCA  
AACAGGATTAGATACCCAGTAGTCC

>Otu16445

CCAGCCTATGGGGGGCTCCAGTGAGAAATATTGCACAATGGGCGAAAGCCTGATGCAGCG  
ACGCCGCGTGAGGATGAAGGTTTTAGGATTGTAAACTCCTGTAAAGTGGGAAAAAGAC  
TCATTTCTAATAAAGATGAGGGATGATGGTACCACTAGAGAAAGCACCGGCTAACTTCGT  
GCCAGCAGCCGCGGTAATACGAGGGGTGCAAACGTTATTCGGAATCATTGGGCGTAAAGG  
GTGCGTAGACGGCGAAATAAGTCAGTCATTAAATTCCTCAGCTTAACCTGAGGGTCTGTGA  
TTGAGACTATTTTGCTTGAGGATGGAAGAGAGAAGTGAATTCCTCGGAGTAGCGGTAAAA  
TGCGTAGATCTCGAGAGGAACACCGGTGGCGAAGGCAGCTTCTTGGTCCATATCTGACGT  
TGAAGTACGAAAGCGTGGGGAGCAAACAGGATTAGAGACCCCGTAGTCC

>Otu16446

CCAGCCTATGGGGTGCAGCAGTAGGGAATATTGGACAATGGGGGAAACCTGATCCAGCC  
ATGCCGCGTGAGTGATGAAGGCCTTCGGGTGTAAAGCTCTTTTAGCAGGGAAGATAATG  
ACTGTACCTGCAGAATAAGCCCCGGCTAACTTCGTGCCAGCAGCCGCGGTAATACGAAGG  
GGGCAAGCGTTGTTTCGGAGTTACTGGGCGTAAAGGGCGCGTAGGCGGCGATACAAGTCAG  
ATGTGAAAGCCCTGGGCTCAACCCGGGATGTGCATTTGATACTGTGTTGCTAGAATTCGG  
GAGAGGTTGGTGGAATTCAGTGTAGAGGTGAAATTCGTAGAGATTGGGAAGAACACCG  
GAGGCGAAGGCGGCCAACTGGTCCGATATTGACGCTGAGGCGCGAAAGCGTGGGGAGCAA  
ACAGGATTAGATACCCGTGTAGTCC

>Otu16448

CCAGCCTATGGGTGTGCTGCAGTCGAGAATCATTCGCAATGGGCGAAAGCCTGACGATGCG  
ACGCCGTGTGAGCGATGAAGGCCTTAGGGTTCGTAAAGCTCTTTCGCTTGGAACAAGAGA  
AGTTGGCAAATAACCACTAATTTGAGGGTACCAGGTAAAGAAGCACCGGCTAACTCCGT  
GCCAGCAGCTGCGGTAATACGAGGGGTGCAAGCATTAAATCGGATTTATTGGGCGTAAAGG  
GCGCGTAGGCGGAAATATAAGTCAGATGTGAAATCCCGGGGCTCAACCCCGGAACAGCAT  
TTGAAACTATATTCCTAGAGGGTAGGCGGAGAAAACGGAATTCACATGTAACGGTGAAA  
TGCGTAGATATGTGGCAGAACATCGGTGGCGAAGGCGGTTTTCTAGCTTATTCCTGACGC  
TGAGGCGCGAAAGTAAGGGGATCAAACAGGATTAGATACCCGCGTAGTCC

>Otu16452

CAGCCTACGGGATGCAGCAGTGGGGAATTTTGTGCAATGGGCGAAAGCCTGACACAGCGA  
CACCGCGTGAGCGAAGAAGCCCTTTGGGGTGTAAAGCTCTGTCTGGCTGGGAAGAAACAA  
TGACGGTACCAGCAAAGGAAGCATCGGCTAACTACGTGCCAGCAGCCGCGGTAAGACGTA  
GGATGCGAGCGTTGTCCGGATTTATTGGGCGTAAAGAGTTTCGTAGGTGGTTTGTAAAGTC  
TAATGTTAAAGATCAGGGCTCAACCCCTGGGAGTGCATTGGATACTGGCAGACTTGAGTGC  
AGTAGAGGCAAGTGGAATTCAGTGTAGCGGTGAAATGCGTAGATATTGGGAAGAACAC

CGGTGGCGTAAGCGACTTGCTGGGCTGTAACTGACACTGAGGAACGAAAGCCAGGGGAGC  
GAATGGGATTAGAGACCCCTGTAGTCC

>Otu16454

CCAGCCTATGGGGCGCTGCAGTGGGGAATATTGGACAATGGGGGCAACCCTGATCCAGCG  
ACGCCGCGTGTGTGAAGAAGGCCTGCGGGTTGTAACTGCTTTTGCAGGGGAATAAACCC  
CCGGTCGTGATCGGGGCTGAATGTACTCTGAGAATAAGGATCGGCTAACTCCGTGCCAGC  
AGCCGCGTAATACGGAGGATCCGAGCGTTATCCGGATTTATTGGGTTTAAAGGGTGCCT  
AGGCGGCCCTTGTAAAGTCAGGGGTGAAAGACGGTAGCTTAACTATCGCAGTGCCTTTGATA  
CTGCAGGGCTTGAATGTACTTGAGGTAGGCGGAATGTGACAAGTAGCGGTGGAATGCATA  
GATATGTACAGAACACCAATTGCGAAGGCAGCTTACTAAAGTATGATTGACGCTGAGGC  
ACGAAAGCGTGGGGATCAAACAGGATTAGAGACCCCTCGTAGTCC

>Otu16477

CCAGCCTACGGGGGGCTGCAGTGGGGAATTTTGCGCAATGGGGGAAACCCTGACGCAGCA  
ACGCCGCGTGAGGATGAAGGCCCTTGGGTCGTAACTCCTTTTCGACCGGGACGATTATG  
ATGGTACCGGTGGAAGAAGCACCGGCTAACTCTGTGCCAGCAGCCGCGGTAATACAGAGG  
GTGCGAGCGTTGTTTCGAATTATTGGGCGTAAAGGGCGCGTAGGCGGTGTTGTAAGTCAC  
CTGTGAAACCTCTGGGCTTAACTCAGAGCCTGCAGGCGAAACTGCAATGCTGGAGGGTGG  
GAGAGGTGCGTGGAATTCCCGGTGTAGCGGTGGAATGCGTAGATATCGGGAGGAACACCA  
GTGGCGAAAGCGGCCTCCTGGACTGTTTCTGACACTCAGACGCGAAAGCTAGGGTAGCAA  
ACGGGATTAGATACCCCCGTAGTCC

>Otu16484

CCAGCCTACGGGTGGCAGCAGTGAGGAATTTTTCGGCAATGGGGGAAACCCTGACCGAGCA  
ATACTACGTGAAGGAGGAAGGTCTACGGATTGTAACTTCTGTTAGCGCGGAAGAAGGGC  
TAAATGTGAGTTAGTTTTTGACGGTACGCGCAGAGAAAGCGACGACTAACTATGTCCAG  
CAGTCGCGGTAAGACATAGGTTCGCAAACGTTATCCGGAATTATTGGGCGTAAAGGATGCG  
TAGATGGCGTGATAAGTTATCAGTGGCAAAATCGGGGCTCAACCTCGTGGAAGTTGGTAAT  
ACTGTCATGCTTGAGTGCAGGGGAGGTTAACGGAACCTCCATGTGGAGCGGTAAAATGTGA  
CGATATATGGAAGAACACCGATAAGGCGAAGGCAGTTAACTATTCTGTTACTGACATTGA  
GGCATGAAAGCGTGGGGAGCAAACCGGATTAGAGACCCCTAGTAGTCC

>Otu16485

CCAGCCTATGGGAGGCACCAAGTCGAGGATTTTCTCAATGGGGGCAACCCTGATGCAGCG  
ACGCCGCGTGAGCGATGAAGTCCTTCGGGGCGTAAAGCTCTTTCGGCTGGGAAGATTATG  
ACGGTACCAGCGGAAGCAGCTGCGGCTAACTACGTGCCAGCAGCCGCGGTAATACGTAGG  
CAGCAAGCGTTGTTTCGGAGTTACTGGGCGTAAAGGGTGTGCAGGCGGTTGTTTAAGTTTG  
GTGTGAAATCTCCCGGCTCAACCGGGAGGGTGCGCCGAATACTGAGCGACTAGAGTGCGG  
GAGAGGAGAGTGGAATTCCTGGTGTAGCGGTGAAATGCGTAGATATCAGGAGGAACACCG  
ATGGTGCAGACGGCTCTCTGGACCGTGACTGACGCTGAGACACGAAAGCGTGGGTAGCAA  
ACAGGATTAGAAACCCTCGTAGTCC

>Otu16496

CCAGCCTACGGGTGGCAGCAGTCGAGAATTTTTCACAATGGGCGAAAGCCTGATGGAGCG  
ACGCCGCGTGGGGGATGAAGGGCTTCGGTCCGTAAACCCCTGTCATTTGCGAACAAACCT  
CCTCCGTGAACAACGGAGGAGCTGATAGTAGCGAAAGAGGAAGGGACGGCTAACTCTGTG  
CCAGCAGCCGCGGTAATACAGAGGTCCCAAGCGTTGTTTCGGATTCACTGGGCGTAAAGGG  
TGCGTAGGTGGCGGGGTAAGTTTGACGTGAAATCTCCGGGCTTAACCCGGAATGGCGTT  
GAATACTCTCCCGCTCGAGGGTTGTAGGGGGGATTGGAATTCTCGGTGTAGCAGTGAAAT  
GCGTAGATATCGAGAGGAACACCAAGTGGCGAAGGCGAATCCCTGGACAACCTCTGACACT  
GAGGCACGAAAGCTAGGGGAGCAAACAGGATTAGAAACCCGAGTAGTCC

>Otu16504

CCAGCCTATGGGTGGCTGCAGTGGGGAATCTTGCGCAATGGACGAGAGTCTGACGCAGCG  
ACGCCGCGTGGGTGATGAAGGCCCTTCGGGTGTAAAGCCCTGTGGGGAGGGACGAATAAG  
TGCTGGCTAACATCCAGCGGATGACGGTACCTCCTTAGCAAGCACCGGCTAACTCTGTG  
CCAGCAGCCGCGGTAAGACAGAGGGTGCAAACGTTGTTTCGGAATTACTGGGCGTAAAGCG  
TGTGTAGGCGGCTTCGTAAGTCGGATGTGAAAGCCCCGGGCTCAACCCGGAAGTGCCT  
CGATACTGCGGAGCTCGAGAACTGGAGAGGTTGGTGGAAATCTCGGTGTAGAGGTGAAAT  
TCGTAGATATCGAGAGGAACACCGGTGGCGAAGGCGGCCAACTGGACAGATACTGACGCT  
GAGACACGAAAGCGTGGGGAGCAAACAGGATTAGAGACCCCTGTAGTCC

>Otu16506

CAGCCTATGGGAGGCTGCAGTAAGGAATATTGGTCAATGGACGCAAGTCTGAACCAGCCA

TGCCGCGTGGAGGATGAAGGTCCTCTGGATTGTAACTTCTTTTATTTGGGAAGAAATGC  
ACCCTTTCTAGGGTGTGTTGACGGTACCAGATGAATAAGCACCGGCTAACTCCGTGCCAGC  
AGCCGCGGTAATACGGAGGGGTGCAAGCGTTATCCGGATTCACTGGGTTTAAAGGGTGCGT  
AGGCGGATCTGTAAGTCAGTGGTGAAATCTCCAGGCTTAACCTGGAACTGCCGTTGATA  
CTATAGATCTTGAATGTTGTGGAGGTTAGCGGAATATGTCATGTAGCGGTGAAATGCATA  
GATATGACATAGAACACCAATTGCGAAGGCAGCTGGCTACACAAATATTGACGCTGAGGC  
ACGAAAGCGTGGGGATCAAACAGGATTAGAGACCCGAGTAGTCC

>Otu16546

CCAGCCTATGGGAGGCCACCAGTAGGGAATTTTGCGCAATGGACGAAAGTCTGACGCAGCA  
ACGCCGCGTGAGTGATGAAGGTCCTTCGGATTGTAAAGCTCTGTTGAGTGGGAAGAAAAGT  
TTCGGGAATAATACCTCGAAATCTGACGGTACCCTTGAGGAAGCCCCGGCTAACTACGT  
GCCAGCAGCCGCGTAATACGTAGGGGGCAAGCGTTGTTTCGGAATCACTGGGCGTAAAGG  
GAGCGTAGGCGGAAGGATAAGTTAGAAGTTTAATGTACGGGCTTAACCCGTAATCTGCTT  
CTAATACTGTTTTTCTTGAGTATGGGAGAGGGAGATGGAATTCCAGGTGTAGCGGTGGAA  
TGCGTAGATATCTGGAAGAACACCAGCTGCGAAGGCGGTCTCCTGGCCCAATATTGACGC  
TGAGGTGCGAAAGTGTGGGGATCAAACAGGATTAGATACCCTCGTAGTCC

>Otu16559

CCAGCCTACGGGGTGCGAGCAGTGGGGAATATTGGACAATGGGCGCAAGCCTGATCCAGCC  
ATACCGCGTGAGTGATGACGGCCCTAGGGTTGTAAAGCTCTTTCACCCACGACGATAATG  
ACGGTACCTGGATAAGAAGCCCCGGCTAACTTCGTGCCGGCAGCCGCGTAATACGAAGG  
GGGCTAGCGTTGTTTCGGAATTACTGGGCGTAAAGCGCGTGTAGGCGGGTCTTTAAGTCAG  
GGGTGAAATGCCAAGGCTCAACCTTGAACTGCCTTTGATACTGTCTATCTTCGAGTTCG  
GGAGAGGTTGGCGGAATTCCTAGTGTAGAGGTGAAATTCGTAGATATTAGGAAGAACACC  
AGTGGCGAAGGCGGCCAACTGGCCCGATACTGACGCTCATGTACGAAAGCGTGGGGAGCA  
AACAGGATTAGATACCCGGGTAGTCC

>Otu16563

CCAGCCTATGGGATGCTGCAGTGGGGAATATTGGACAATGGGCGCAAGCCTGATCCAGCC  
ATGCCGCGTGAGTGATGACGGCCCTAGGGTTGTAAAGCTCTTTCACCCACGACGATAATG  
ACGGTACCTGGAGAATAAGCACCGGCTAACTTCGTGCCAGCAGCCGCGTAATACGAAGG  
GTGCTAGCGTTGTTTCGGAATTACTGGGCGTAAAGCGCGCGTAGGCGGCTTTTCAAGTCAG  
GGGTGAAATCCTTGGGCTCAACCCAAGAATTGCCTTTGAACTGTGGAGCTAGAGTGTCTG  
GAGGGGATAGCGGAATTCCTAATGTAGAGGTGAAATTCGTAGATATTAGGAGGAACACCG  
GTGGCGAAGGCGGCTATCTGGACGACAACCTGACGCTGAGGCGCGAAAGCACGGGGATCAA  
ACAGGATTAGAAACCCTAGTAGTCC

>Otu16567

CCAGCCTACGGGGTGCTGCAGGCGCGAAAAATCTCCAATGCACGCAAGTGTGAGAGAGGA  
ATCTTGAGTGCTTTTCTTAAACGAAAAGCTTTTGCCTACTGTAAAAAGGTACGAGAATAA  
GGGCTGGGCAAGATCGGTGCCAGCAGCCGCGTAATCCCGACGGCCCGAGTGGGACTCGC  
AATTATTGGGTCTAAAACATTCGTAGCTGGTTTTATAAGTTTCTTGTTAAATTGTAAGGC  
TCAACCTTGTAGCTGCAAGAAATACTGTAAGGCTAGGGACTGGGAGATGTAGCGAGTACA  
TCCGGGGTAATGGTAAAATATGTTAAGCCTGGATGGACTAACAATGGCGAAGGCACGCTA  
CAATAACAGATCCGACAGTGAGGAATGAAGGCCAGGGGCGCAAATTGGATTAGATACCC  
AGTAGTCC

>Otu16570

CCAGCCTACGGGTTGCTGCAGTGGGGAATTTTGCGCAATGGGCGAAAGCCTGACGCAGCA  
ACGCCGCGTGGGTGATGAAGGTCCTTCGGATCGTAAACCCCTGTCGTCAGGGACGAAGGTC  
GGGAGTTGAATAGGCTCTTGCTTGACGGTACCTGGAGAGGAAGCCCCGGCTAACTCTGT  
GCCAGCAGCCGCGTAATACAGAGGGGGCAAGCGTTATTCGGAATTATTGGGCGTAAAGG  
GCGCGTAGGCGGTTTTTTAAGTGAGATGTGCAATCCCGAGCTTAACCTGGGAACTGCAT  
CTCAGACTGGAAGGCTAGAGTGCTGGAGAGGGTGGTAGAATTCACGCTGTAGCGGTGAAA  
TGCGTAGAGATGTGGAGGAATACAGTGGCGAAGGCGGCTCTCTGGACTCAAACCTGACGC  
TGAGGTACGAAAGCGTGGGTAGCAAACAGGATTAGAAACCCTAGTAGTCC

>Otu16573

CCAGCCTATGGGTTGCACCAGTAAGGAATATTGGACAATGGTGGCAACACTGATCCAGCC  
ATGCCGCGTGCAAGGATGAAGGCGCTACGCGTTGTAACTGCTTTTGTACCAGAGAAAACC  
CTCCTACGTGTAGGAGGCTGATAGTATAGTTAGAATAAGCATCGGCTAACTTCGTGCCAG  
CAGCCGCGGTAAGACGAAGAATGCAAGCGTTATCCGGATTCAATTGGGTTTAAAGGGAGCG  
TAGGTGGACTTATAAGTCAGTGGTGAAATCTTTGGGCTTAACCCAAAAATTGCCATTGAT

ACTGTAGGTCTTGAGTACAGTTGCTGTGGGCGGAATATGACATGTAGTGGTGAATACAT  
AGAGATGTCATAGAACACCGATTGCGAAGGCAGCTAACGAACTATAACTGACGCTGAGG  
CACGAAAGTGC GGGGATCAAACAGGATTAGAAACCCAGTAGTCC

>Otu16574

CCAGCCTATGGGTGGCTCCAGTGGGGAATATTCCGCAATGGACGAAAGTCTGACGGAGCG  
ACGCCGCGTGAGTACGAAGGCCGAAAGGTTGTAAAGTCTTTTGTGGGGAAGAATAAC  
CATGGGAGGGAATGCCCCGTGGGATGACATGAACCGACGAATAAGCCCCGGCTAACTACGT  
GCCAGCAGCCGCGGTAACACGTAGGGGGCGAGCGTTGTTTCGGAATTACTAGGCGTAAAGC  
GAGTGTAGGCGGGTGCTTAAGTCCGTCGTGAAATCTCCCGGCTCAACTGGGATAGGTGCG  
TGGATACTGGGCGCCTAGAGTGGGGTAGGGGGCAGTGGAATTCCTGGTGTAGCGGTGAAA  
TGCGTAGATATCGGGAGGAACACCTATGGCGAAAGCAGCTGCCTGGGCCCTTACTGACGC  
TGAGGCTCGAAAGCTAGGGGAGCAAACAGGATTAGAAACCCGGGTAGTCC

>Otu16583

CCAGCCTACGGGGGGGCTGCAGTGGGGAATATTGGACAATGGGCGCAAGCCTGATCCAGCC  
ATGCCGCGTGAGTGAAGAAGGCCTTAGGGTTGTAAAGTCTTTTGGCGGGGACGATAGTG  
ACGGTACCCGCGAGAATAAGCCCCGGCTAACTTCGTGCCAGCAGCCGCGGTAATACGAAGG  
GGGCTAGCGTTAATCGGAATTACTGGGCGTAAAGCGTGCGCAGGCGGTTATACAAGACAG  
ATGTGAAATCCCCGGGCTCAACCTGGGAATTGCATTTGTGACTGTATGGCTAGAGTGTGT  
CAGAGGGGGGTAGAATTCCACGTGTAGCAGTGAAATGCGTAGAGATGTGGAGGAATACCG  
ATGGCGAAGGCAGCCCCCTGGGATAACACTGACGCTCATGCACGAAAGCGTGGGGAGCAA  
ACAGGATTAGATACCCTGGTAGTCC

>Otu16600

CCAGCCTATGGGGGGCAGCAGTAAGGGATATTGCGCAATGGGCGAAAGCCTGACGCAGCA  
ACGCCGCGTGAGGATGAAGGGTTTCGGCTCGTAAACTCCTTTTGGCACTGACGAGGAAG  
GACGGTAGGTGCTGAAGAAGTCACGGCTAACTACGTGCCAGCAGCCGCGGTAACACGTAG  
GTGGCAAGCGTTATCCGGATTTACTGGGCGTAAAGCGTGTGCAGATGGGTCGCCAAGTCC  
GCTATGAAAGCCCCGAGCTTAACCTCGGGCGGGTTAGTGGAGACTGGCGGTCTAGGGAGCA  
GGAGAGGGAGGTGGAATGCCGGGTGTAGTGGTGAATGCGTAGAGATCCGGCAGAACCCC  
AGAGGCGAAGGCGGCCTCCTGGCCTGTATCCGACATTCAGACACGACAGCATGGGGAGCG  
AACGGGATTAGAAACCCTCGTAGTCC

>Otu16602

CCAGCCTACGGGTGGCTGCAGCCGAGAATATTGCGCAATGGGCGAAAGCCTGATCGAGCG  
ACACCGCGTGTTGATGAAGTCCTTCGGGACGTAAAAACCTTTTATGATTAAGAAAGTTT  
ATTGATCTGATCATGAATAAGGGGCTCCAACTCTGTGCCAGCAGGAGCGGTAATACAGA  
GGCCCCAAGCGTTATCCGGAATCACTGGGCGTAAAGGGTGTGTAGGTGGTTTTTGGGCCGA  
CGTGAAAGTCGGCCTCCCGATACCGTAAGGTCGTGCGGATTAGTCTTCCGTTAAATCTCC  
CGACTCAATCGGGAATGCGGGGGATACGGCAAACTTAGAGAGTGCAGGGGGTGAATG  
GAACTCATGGAGTAGGGGTGAAATCCGTTGATATCATGGGGAACACCAAAAGCGAAGGCA  
ATTCACTGGCGCATTTCTGACACTGAAACACGAAAGCGTAGGTAGCGAATGGGATTAGAA  
ACCCGCGTAGTCC

>Otu16620

CCAGCCTACGGGGGGCACCAGTGAGGAATATTGCGCAATGCCCCGAAAGGGTGACGCAGCG  
ACGCCGCGTGAGGTTGAAGGCCCTATGGGTCGTAAACTCCTTTTGTGAGGGAATAACAT  
CCTGCTATATGCAGGATTGAATGTACCTCAGGAAAAGCATCGGCTAACTACGTGCCAGC  
AGCCGCGGTAATACGTAGGATACTAGCGTTGTCCGGATTTACTGGGTGTAAAGGGAGCGC  
AGGCGGATTGGTAAGTCAGTGGTGAATTTCTTAGGCTTAACCTGAGAACTGCCACCGATA  
CTGCCGATCTTGAGTGCAGAAGAGGTTGATGGAATTCTAGGTGTAGCGGTGAAATGCGTA  
GATATCTAGAAGAACCCGATGGCGAAGGCAGTCAACTGGTCTGCTACTGACGCTCATGC  
TCGAAAGCGTGGGGATCAAACAGGATTAGATACCCCTGTAGTCC

>Otu16626

CCAGCCTATGGGACGCAGCAGTGGGGAATATTGGACAATGGGCGAAAGCCTGATCCAGCA  
ATGCCGCGTGAGTGATGAAGGCCTTCGGGTGTAAAGTCTGTGCGGAGGGGACAAAAACC  
ATTAAGGTGAATAGCCTTAGTGCTTGATGGTACCCTTAAAGGAAGCACCGGCTAACTTCG  
TGCCAGCAGCCGCGGTAATACGAAGGGTGCAAGCGTTGCTCGGAATTATTGGGCGTAAAG  
GGTAGGTAGGTGGTTACGTATGTCTGAGGTGAAATCCCCGAGCTTAACCTGGGAAGTGCC  
TTGGAACGGCGTAACCTAGAGTACTGGAGAGGTTTCGTAGAATTCTGGTGTAGCGGTGAA  
ATGCGTAGAGATCAGGAGGAATATCAGAGGCGAAGGCGGCGAACTGGACAGTAACTGACA  
CTAACTACGAAAGCGTGGGGAGCAAACAGGATTAGAAACCCTAGTAGTCC

>Otu16632

CCAGCCTACGGGTCGCAGCAGTTTGGAAATTTTGGACAATGGGCGAAAGCCTGATCCAGCG  
ACGCCGCGTGACGATGAAGGCCTTCGGGTGTAAAGTCTTTTGTCTCGGGAACAATTTT  
TGAGCGTACCGAGAGAATAAGAGGTTGCTAACTCTGTGCCAGCAGCAGCGGTAATACAGA  
GACCTCAAGCGTTATCCGGAATCATTGGGCGTAAAGCGTACCGATGGGTGGTCTTACAAG  
TCAGAAGTGAAATTCCAAAGCTCAACTTTGGGACTGTCTTTTGAAGTGTAAAGTGTGAG  
GGGCAAAGAGGAAGCTGGAACGAACGGTGTAGTAGTGAAATGCGTTGATATCGTTTCGAA  
CACCAATAGCGTAGGCAGGCTTCTGGGTGCCACCTGACACTGCTAGGACGAAAGCGTGGG  
GAGCGAATGGGATTAGAAACCCGAGTAGTCC

>Otu16645

CCAGCCTATGGGTGGCACCAGTAGGGAATTTTGCGCAATGGACGAAAGTCTGACGCAGCG  
ACGCCGCGTGAGTGATGAAGTCTTCGGATTGTAAAGTCTTTTGTGGGGGAAGAACCTG  
CAGGTGAAGAACCTGCACTGACGGTACCCCAAGAAAAGCTCCGGCTAACTCTGTGCCAG  
CAGCCGCGGTAATACAGGGGGAGCTAGTGTTGTTTCGGATTTACTGGGTGTAAAGGGAGCG  
TAGGCGGGAATCTAAGTCAGGGGTGGAATTTTCGAGGCTCAACCTTGAAGTGTGCTCTGAT  
ACTGGATTTCTTGAGTATGGGAGAGGACGATGGAATTCCTGGTGTAGCGGTGGAATGCGT  
AGATATCAGGAGGAACACCGATGGCGAAGGCATTCTGTCTGGAACAATACTGACGCTGAGG  
CTCGAAAGCATGGGGAGCAAACAGGATTAGAAACCCTCGTAGTCC

>Otu16685

CCAGCCTACGGGGTGCTCCAGTCGAGAATCTTCCGCAATGGACGCAAGTCTGACGGAGCG  
ACGCCGCGTGATGGGTGAAGTCTTTCGGGATGTAAACATCTTTTATGAGCGAGAAAGTTT  
ATTGATCAGCTCATGAATAAGGGGTTGCTAACTCGTGCCAGCAGCAGCGGTAATACGAG  
TGCCCCGAGCGTTATCCGGAATTATTGGGCGTAAAGGGTGTGTAGGCGGTTGCGTTAGTC  
TCTTGTCAAATCTCTCGACTCAATCGAGAACCTGCAAGGGAAACGGCGCACCTAGAAGAT  
GTGAGGGGTATGCGGAACTCATAGTGTAGGGGTGAAATCCGTTGATATTATGGGGAACAC  
CAAAAGCGAAGGCAGCATACTAGCACATTCTTGACGCTGAAACACAAAAGCGTGGGTAGC  
GAATGGGATTAGAAACCCTCGTAGTCC

>Otu16687

CCAGCCTATGGGTGGCAGCAGTGGGGAATCTTGCGCAATGGACGAAAGTCTGACGCAGCC  
ACGCCGCGTGAGTGAAGAAGGCCTTCGGGTGTAAAGTCTGTCTGAGCGGGACGAACATC  
CTTGTGGTTAATAGCCACAGGGACTGACGGTACCGCTAAAGGAAGCACCGGCTAACTCTA  
TGCCAGCAGCCGCGGTAATACAGAGGGTGCAAGCGTTGCTCGGAATCATTGGGCGTAAAG  
GGTAGGTAGGTGGTCTCGTTTGTCTGGGGTGAAGCCAGGGCTTAACCCTGGAAGTGCC  
CCGGAACGGCGAGACTGGAGTCTTGAGAGGGTCTGTGAATTCCTGGTGTAGCGGTGAA  
ATGCGTAGAGATCGGGAGGAACACCAGCGGCGAAGGCGGCGACCTGGACAAGTACTGACA  
CTGAGGCACGAAAGCTAGGGGAGCAAACAGGATTAGATACCCTCGTAGTCC

>Otu16688

CCAGCCTACGGGTGGCAGCAGTGGGGAATATTGGACAATGAGGGCAACCCTGATCCAGCA  
ATGCCGCGTGGGTGATGAAGGCCTTCGGGTGTAAAGTCTTTTACCCACGACGATGATG  
ACGGTAGTGGGAGAAGAAGCCCCGGCTAACTTCGTGCCAGCAGCCGCGGTAATACGAAGG  
GGGCTAGCGTTGTTTCGAGTTACTGGGCGTAAAGGGCGCGTAGGCGGCCTGATCAGTCTG  
GTGTGAAAGCCCCGGGGCTCAACCCCGGAATTGCACTGGAGACGGTCAAGCTTGAGTGTGG  
GAGAGGATGGTGGAATTCACAGTGTAGAGGTGAAATTCGTAGATATTGGGAAGAACCCCG  
GTGGCGAAGGCGGCCATCTGGACCATTACTGACGCTGAGGCGCGAAAGCGTGGGGAGCAA  
ACAGGATTAGAAACCCAGTAGTCC

>Otu16698

CCAGCCTACGGGTTCGCAGCAGTGGGGAATTTTGGGCAATGAGGCAACCCTTGACCCAGCG  
AGAATTCCTGCGATGACGAATGTGGTCAGTTTCTGTAAAGTGCTTTTGTGATCAAGAGC  
TTGACTGTAGTCACAGTAAGAAGCACCGGCTAACTCCGTGCCAGCAGCTGCGGTAAGACG  
GAGGGTGCGGGCCTTATTCATTTTGATTGGGTGTAAAGGGTATGTAGGTGCTATTGTTA  
GTTTTAGACAAAAATTGTGGAGAGTTCTACACAGTTGTCTTCCTCTGATAGAGCTTGAG  
TTGAGGAGTGGTCTGGCAAATTCGCGTGTAAGAGTGAAATCCCCTAGATTGCAATGAA  
TACCGGCAAGCAAAGGCGCGCATCCCGTTTCAACTGACGCTCAGGTACGGAAGCTACGGG  
AGCAAACAGGATTAGATACCCCTGTAGTCC

>Otu16710

CCAGCCTACGGGAGGCTGCAGTAGGGAATATTGGGCAATGGGCGAAAGCCTGACCCAGCA  
ACGCCGCGTGACGATGAAGTCTTCGGATCGTAAAGTGCTTTTCTGAGAGATGAGAAAG  
GACAGTATCTCAGGAATAAGTCTCGGCTAACTACGTGCCAGCAGCAGCGGTAATACGAGG



GGGGCGAGCGTTGTTTCGGAATTATTGGGTTTAAAGGGTGCGTAGGCGGACTTATAAGTCA  
GTGGTGAAATCTCGTTGCTTAACAACGAACGTGCCATTGATACTGTAGGTCTTGAGTACA  
GATGCCGTTGGCGGAATGTGTTCATGTAGCGGTGAAATGCATAGATATGACACAGAACACC  
GATTGCGAAGGCAGCTGACGAACTGTAACGTGACGCTGAGGCACGAAAGCGTGGGGATCA  
AACAGGATTAGATAACCCCGTAGTCC

>Otu16722

CCAGCCTACGGGAGGCAGCAGTCGAGAATTTTTTACAATGGGCGAAAGCCTGATGGAGCG  
ACGCCGCGTGGGGGATGAATGGCTTCGGCCCGTAAACCCCTGTCATTTCGGGATCAATGCG  
TCTGGGTGAACATCTCAGACGTTGATAGTACCGGAAGAGGAAGGGACGGCTAACTCTGTG  
CCAGCAGCCGCGGTAATACAGAGGTCCCAAGCGTTGTTTCGGATTCACTGGGCGTAAAGGG  
TGCGTAGGTGGTTGGGTAAGTCTGATGTGAAATCTCGGAGCTTAACTCCGAAACTGCATT  
GGATACTATTTCAGCTTGAGAGTTGGAGGGGGGACTGGAATTCTCGGTGTAGCAGTGAAAT  
GCGTAGATATCGGGAGGAACACCAGTGGCGAAAGCGGCCTCCTGGACTGTTTCTGACACT  
CATATGCGAAAGCTAGGGTAGCAAACGGGATTAGAAACCCGCGTAGTCC

>Otu16728

CCAGCCTATGGGGGGCAGCAGTCGCGAAACCTTGACAATGCGCGAAAGCGTGATCAGGGT  
ACTCTGAGTGCCGACCTAACGGTCGGCTTTTAATCAGCCTGAAAAGCTGGTTGAATAAGG  
GCTGGGTAAATCTCGTGCCAGCCGCGCGGTAACACGAGTAGCCCAAGTGGTGCCACGA  
ATATTGAGTCTAAAACGCATGTAGCCGGTCCCGTACGTTCCCGTGAAATCTCTCGGCTC  
AACCAGAGAGGCGCGCGGGGAAGACTGCGGGGCTTGGAATGGAGGAGGTCAAGGGTACTG  
TAAGGGGAGGAGTAAAATCCTGTAATCCTTACAGGACCATCGGTGGCGAAAGCGCTTGAC  
CAAGACATGTCCGACGGTGAGATGCGAAGGCTAGGGGAGCAAATCGGATTAGAAACCCCG  
GTAGTCC

>Otu16746

CCAGCCTATGGGGCGCAGCAGCTAAGAATATTCGCAATGGGCGCAAGCCTGACGGAGCA  
ATCTCGCGTGAGGGATTGAAGGCCTTCGGGTGTAAACCTCTTTTCGTCAGAGAAGAATAA  
AACGGATAGGAAATGATCCGTTGATGACTGTACCTGAGGAAGAAGCACCGGCTAATTACG  
TGCCAGCAGCCGCGGTAATACGTAGGGTGCAAACGTTGTTTCGAAATCACTGGGCGTAAAG  
GGTACGCAGGCGGCCAATTAAGTTAATGGTGAAATCCCGGAGCTCAACTCCGGAATGCC  
GTTAATACTGGTTGGCTAGAAATCGGAATAGAGGCAGCGGGAATTCCTGGTGTAGGAGTGA  
AATCTGTAGATACCAGGAGGAACACCAATGGCGAAGGCAAGCTGCTGGGTACCGATTGAC  
GCTCATGTACGGAAGCTAGGGGAGCGAATGGGATTAGATAACCCGTGTTAGTCC

>Otu16758

CCAGCCTATGGGAGGCAGCAGTTGGGAATTTTGGGCAATGGGCGAAAGCCTGACCCAGCA  
ACGCCGCGTGAGGGATGAAGGCCTTCGGGTGCTAAACCTCTTTTCTCAGGGAAGATAATG  
ACGGTACCTGAGGAAGAAGCCACGGCTAACTACGTGCCAGCAGCCGCGGTAACACGTAGG  
AGGCGAGCGTTATCCGGATTTACTGGGCGTAAAGCGTGTGCAGGTGGTTTGGTAAGTTGG  
ATGTGAAAGCTCCTGGCTCAACTGGGAGAGGTGCTTCAATACTACCAGACTTGAGAGCAG  
TAGAGGGAGGTGGAATTCCCGGTGTAGTGGTGAAATGCGTAGATATCGGGAGGAACACCA  
GTGGCGAAAGCGGCCTCCTGGACTGTTTCTGACACTCAGACACGAAAGCTAGGGTAGCAA  
ACGGGATTAGAAACCCGCGTAGTCC

>Otu16764

CCAGCCTATGGGGTGCTGCAGTGGGGAATTTTTCGCAATGGGGGAAACCTGACGCAGCA  
ACGCCGCGTGAGGATGAAGCCCTTGGGGCGTAAACTCCTTTTCGACCGGGACGATACTG  
ACGGTACCGGTGGAAGAAGCACCGGCTAACTCTGTGCCAGCAGCCGCGGTAATACGGAGG  
ATGCGAGCGTTATCCGGATTCATTGGGTTTAAAGGGTGCGTAGGCGGACTGATAAGTCAG  
TGGTGAAAACCTGCAGCTTAACTGTAGAACTGCCATTGATACTGTCGGACTTGAGTATGG  
TCAAGGTAGGCGGAATGTGTAATGTAGCGGTGAAATGCTTAGATATTACACAGAACACCG  
ATTGCGAAGGCAGCTTGCTGGGCCATTACTGACGCTGATGCACGAAAGCGTGGGGATCAA  
ACAGGATTAGATAACCCGCGTAGTCC

>Otu16772

CCAGCCTACGGGGCGCACCAGTTCGGAATATTCGGCAATGGGCGAAAGCCTGACCGAGCG  
ACGCCGCGTGCGGGATGAAGGCCCTCTGGGTGTAAACCGCTGTCACAGGTGAGCAAATC  
ATACGCGCTTAACAAACGTGTATGTTGAGTTAAGCTTGAGAGGAAGCCCCGCTAATCAC  
GTGCCAGCAGCGGCGGTAATACGTGAGGGGGCAACGTTGTTTCGGTGTCACTGGGCTTAAA  
GGGCGCGTAGGTGGCTGCGTAAGTAAGGTGTGAAAGCCCTCGGCTTACCCGGGGGAATTGC  
GCCTTATACTGCGTGGCTTGAGGATCTCAGGGGAAGGGGGAACTCCAGGTGTAGCGGTGA  
AATGCGCAGATATCTGGGGGAAGGCCGCGCGCGAAGGCGCCCTTCTGGGAGAAACCTGAC

ACTGAGGCGCGAAAGCTAGGGGAGCGAACGGGATTAGAAACCCCGGTAGTCC

>Otu16778

CCAGCCTACGGGGTGCTGCAGTGGGGAATTTTGCGCAATGGGGGAAACCCTGACGCAGCG  
ACGCCGCGTGAGTGATGAAGCCCTTCGGGGTGTAAGCTCTTTCGACGGGGACGATGATG  
ACGGTACCCGGAGAAGAAGCTGCGGCTAACTACGTGCCAGCAGCCGCGGTAATACGTAGG  
CAGCGAGCGTTGTTCCGAATTACTGGGCGTAAAGAGTGCGTAGGCGGTTGGGCAAGTCTG  
ATGTGAAATCTCCCGGCTTAAC TGGGAGGGTGCGCCGAAACTGCCTGGCTAGAGTGTGG  
GAGAGGAAAGTGGAATTCCTGGTGTAGCGGTGAAATGCGTAGATATCAGGAGGAACACCT  
GCGGTGTAGACGGCTTTCTGGACCATAACTGACGCTGAGGCACGAAAGCGTGGGGAGCAA  
ACAGGATTTGAGACCCCTGTAGTCC

>Otu16785

CCAGCCTATGGGGGGCTGCAGTGGGGAATATTGGACAATGGGCGAAAGCTTGATCCAGCA  
ATATCACATGAGAGAAGAAGGCCTCTGGTTCGTAAATCTATTGCGTTAAGGAGGATAATGA  
CGTGTACTTAAAGAAGAAAGTCCCGGCTAACTTCGTGCCAGCAGCCGCGGTAATACGGAG  
GGGACGAGTGTTACTCATAATGACTGGGCGTAAAGGGTATGTAGGTGGTTTATTTAGTTA  
AATAGTAAAGAATAGATTAAGTTTATAGGACTATTTAAAACGTTTACTAGACTAGAGTAT  
AGGAGAGGAATATAGAATTTTATAGAGAAAAGGTGAAATTTTATAATAATAAAAGACGAT  
CAAAAGCGAAGGCGATATTCTGGATTATTACTGACACTGAGGTACTGAAGCATGGGGAGC  
AAATCGGATTAGAAACCCCGTAGTCC

>Otu16788

CCAGCCTATGGGGTGCGAGCAGTGGGGAATATTGGACAATGGGCGCAAGCCTGATCCAGCA  
ATGCCGCGTGAGTGATGAAGGCCTTAGGGTTGTAAAGCTCTTTCGCACGTGACGATGATG  
ACGGTAACGTGAGAAGAAGCCCGGCTAACTTCGTGCCAGCAGCCGCGGTAATACGAAGG  
GGGCTAGCGTTGTTCCGAATTACTGGGCGTAAAGGGCGCGTAGGTGGCCGCTCAAGTCAG  
GCGTGAAATCCCGGGGCTTAACCTGGGAATTGCGCTTGAGACTGATTGGCTTGAGTTCGG  
GAGAGGTGAGTGGAATTCACAGTGTAGAGGTGAAATTCGTAGATATTGGGAAGAACACCA  
GTGGCGAAGGCGGCTACCTGGACCGGTTCTGACGCTGAGGCGCGAAAGCTAGGGGAGCAA  
ACGGGATTAGATACCCCTGTAGTCC

>Otu16794

CCAGCCTACGGGTTGCTCCAGTGAGGAATATTGGTCAATGGACGGAAGTCTGAACCAGCC  
ATCCCGCGTGCGAGGAAGAATGCGCTATGCGTTGTAAACTGCTTTTCCAGGGGAAGAAAAC  
CTCCGACGTGTCGGGGCTTGCGGCTACCTTGGAATAAGCATCGGCTAACTCCGTGCCAG  
CAGCCGCGGTAATACGGAGGATGCTAGCGTTGTCCGGATTTACTGGGTGTAAAGGGAGCG  
CAGGCGGGTTGTAAGTCGGTGGTGAATTTCTCGGGCTTAACCCGAGGACTGCCATCGAT  
ACTGCTGATCTTGAGTGCAGAAGAGGTTGATGGAATTTCTAGGTGTAGCGGTGAAATGCGT  
AGATATCTAGAAGAACACCGATGGCGAAGGCAGTCAACTGGTCTGCTACTGACGCTCATG  
CTCGAAAGCGTGGGGATCAAAACAGGATTAGAGACCCTCGTAGTCC

>Otu16811

GGACTACTGGGGTTTCTAATCCTGTTTGCTACCCACACTTTCGCGCCTCAGCGTCAGTTA  
CTGTCCAGGTGGCCGCTTCGCCACTGGTATTCCTCCACATCTCTACGCATTTACCGCT  
ACACGTGGAATTCTACCACCTCTCCAGTACTCTAGCGTTCCAGTCTGAGATGCAGTTCC  
CAAGTTAAGCTCGGGGATTGCACATCTCACTTAAAACACCGCCTACGCGCCCTTTACGCC  
CAATAATTCCGAATAACGCTTGCCCCCTCTGTATTACCGCGGCTGCTGGCACAGAGTTAG  
CCGGGGCTTCCTCTCCAGGTACCGTCAAGTCACAGGAATATTCAACCCGTAACCTTCGTC  
CCTGACGACAGGGTTTTACGATCCGAAGACCTTCATCACCCACGCGGCGTTGCTGCGTCA  
GGCTTTTCGCCCATTTGCGCAAAATTCCTCCACTGGAGCACCCCGTAGGCTGG

>Otu16818

CCAGCCTATGGGTTGCTGCAGTCGAGAATTTTTTCAATGGGCGAAAGCTTGAAGGAGCG  
ACGCCGCGTGGGGGATGAAGGGCTTCGGCCTGTAAACCCCTGTCATTTGCGAACAAACCT  
TGTTTCGATAACACCGGACAAGCTGATTGTAGCGAAAGAGGAAGGGACGGCTAACTCTGTG  
CAGCAGCCGCGGTAATACAGAGGTCCCAAGCGTTGTTTCGGATTTACTGGGCGTAAAGGGT  
GCGTAGGTGGTTGGGTAAGTCTGATGTGAAATCTCGGAGCTTAACTCCGAAACTGCATTG  
GATACTATCCGGCTAGAGGATCGGAGGGGGGACTGGAATTTCTCGGTGTAGCAGTGAAATG  
CGTAGATATCGAGAGGAACACCAAGTGACGAAGGCGAGTCCCTGGACGACTCCTGACACTG  
AGGCACGAAAGCTAGGGGAGCAAACAGGATTAGAAACCCGAGTAGTCC

>Otu16831

CCAGCCTACGGGGGGCTGCAGTCGAGAATTTTTTCTCAATGGGGGAAACCCTGAAGGAGCG  
ACGCCGCGTGGAAGGATGAAGGTCTTCGGATTGTAAACTTCTGTCAATTTGGGAACAATTGT

TGGCGATTAACTGTCGTCAGCTTGATAGTACCAGAAGAGGAAGAGACGGCTAACTCTGTG  
CCAGCAGCCGCGGTAATACAGAGGTCTCAAGCGTTGTTTCGGATTTCATTGGGCGTAAAGGG  
TGCGTAGGTGGTGTCTGTAAGTCGGGTGTGAAATCTCGGGGCTTAACCCCGAAACTGCATT  
CGATACTGCGGTGCTCGAGGACTGGAGAGGAGACTGGAATTCACGGTGTAGCAGTGAAAT  
GCGTAGATATCGTGAGGAAGGCCAGTGGCGAAGGCGGGTCTCTGGATAACTCCTGACACT  
GAGGCACGAAAGCTAGGGGAGCAAACAGGATTAGATACCCCAGTAGTCC

>Otu16833

CCAGCCTACGGGTGGCTCCAGTCGAGGATCTTTTGCAATGGGCGAAAGCCTGACAAAGCG  
ACGCTGCGTGGAGGATGAAGGCCTTCGGGTGTAAACTCCTGTCATCCGGGAACAATTGT  
CGGTTGGTTAATAACCGGCCGGCTTGATGGTACCGGAAGAGGAAGCCACGGCTAACTCTG  
TGCCAGCAGCCGCGGTAATACAGAGGTGGCGAGCGTTGTTTCGGATTTACTGGGCGTAAAG  
GGTGCCTAGGTGGTTTTCTGTGTGTCGGATGTGAAAGCCCGCTGCTCAACGGCGGAAATGCA  
TTCGAAACTGCGGAACTGGAGTGCAGGAGGGGAGAGCGGAATACTCGGTGTAGCGGTGAA  
ATGCGTTGATATCGAGTAGAACACCGGTGGCGTAGGCGGCTCTCTGGAGTGCAACTGACA  
CTGAGGCACGAAAGTCAGGGGAGCAAACAGGATTAGAGACCCCAGTAGTCC

>Otu16834

CCAGCCTATGGGGGGCAGCAGTTAGGGAAATCTCCAATGCGCGCAAGCGTGAGAGAGCG  
AGTCAGAGTGTTATTCTTTTTAAGAATAACTTTTGTGTTGTGTAAGAAGACAGATGAATA  
AGGACTGGGCAAGATCGGTGCCAGCCGCCGCGTAATCCCGACGGTCCGAGTCGCAGCCA  
CAATTATTGGGTCTAAACATTCGTAGCTTGTCTTGTAAGTTCTTTGTGAAATTCTAAAT  
CTTAAGTTTAGAGCGCGCAAGGAATACTGCTTGACTTGGGACTGGAAGAAGCAAGAAGTA  
TGTTTCGAGGTAGTGGTAAAATATGTTAATCTTGAACAGACTAACAAACAGCGAAGGCATCT  
TGCTAGTACAGATCTGACAGTGAGGAATGAAGGCTAGGGTCGCGAAACGGATTAGAAACC  
CCGGTAGTCC

>Otu16835

CCAGCCTATGGTGGGCAGCAGTAAGGAATATTGGACAATGGTGGCAACACTGATCCAGCC  
ATGCCGCGTGCAAGGATGAAGGCGCTACGCGTTGTAAACTGCTTTTGTAGGGGAAGAGGAA  
GGACGGTACCCTGCGAATCAGTCTCGGCTAACTACGTGCCAGCAGCCGCGGTAAAACGTA  
GGAGGCGAGCGTTATCCGGATTTACTGGGCGTAAAGGGTGTGCAGGCGGGCCGTAAAGTG  
GTGCATGAAAGCGAAGGGCTCAACCCTTCGAGGCTGTGCCAGACTGGCGGGCTAGAGTGC  
GGGAGAGGGCTGTGGAATTCCGGGTGTAGTGGTGAATGCGTAGAGATCCGGAGGAACAC  
CAGAGGCGAAGGCGGCAGCCTGGTCCGCGACTGACGCTGAGACACGACAGCATGGGGATC  
AAACAGGATTAGATACCCCTGTAGTCC

>Otu16848

CCAGCCTACGGGGGGCTCCAGTGGGGAATATTGGACAATGGGGGAAACCCTGATCCAGCG  
ATGCCGCGTGTTGAAGAAGGCCTGAGGGTTGTAAAGCACTTTAGTTGGGGAAGAGATAG  
TAGAGTTTAAGAGACACTATTTGAGACATGAACCAAAGAATAAGCACCGGCTAACTCCGT  
GCCAGCAGCCGCGTAATACGGAGGGTGCAAGCGTTAATCGGAATAATTGGGCGTAAAGA  
GTGCGTAGGTGGCTTGCCAAGTGCGTTGTGAAAGACTCGGGCTTAACCTGGGGGTGTCAA  
CGCAAAGTAGCAAAGTAGAGTACAGTAGAGGGTCTGTGGAATTTCCGGTGTAGCGGTGAAA  
TGCGTAGAGATCGGAAGGAACACCTGTGGCGAAGGCGACGACCTGGGCTGAAACTGACAC  
TGAGGCACGAAAGCGTGGGGAGCAAACAGGATTAGATACCCCTGGTAGTCC

>Otu16851

CCAGCCTATGGGTTGCAGCAGTCGAGGATCTTTAGCAATGCCCGAAAGGGTGACTATGCG  
ACGCCGCGTGCAAGGATGAAGGCCTTCGGGTCTGTAAACTGCTGTGAGGGGGGAAGAACTT  
CATGCGTTAATAGCGCGTGAACCTGACATCACCCCCAAAGGAAGCCACGGCTAACTCTGTG  
CCAGCAGCCGCGGTAAGACAGAGGTGGCAAGCGTTGTTTCGGATTTATTGGGTGTAAAGGG  
TCCGTAGGTGGCTATGCAAGTCCGGTGTGAAATCCCAGGGCTCAACCCTGGAAGTGCATT  
GGAAACTGCATGGCTTGAGTACCGGAGAGGTGAAGGGAATTCTCGGTGTAAGGGTGAAT  
CTGTAGATATCGAGAGGAACACCAGTGGCGAAAGCGCTTCACTGGCCGGTTACTGACACT  
GAGGGACGAAAGCAAGGGGAGCGAACAGGATTAGATACCCCAGTAGTCC

>Otu16872

CCAGCCTATGGGGCGCAGCAGTCGAGAATCTTCCGCAATGGGCGAAAGCCTGACGGAGCG  
ACGTCGCGTGCTGGATGAAGTCTTTCGGGACGTAAACAGCTTTTATGTATGAGGAAGTTT  
TGACGTTAGTACATGAATAAGGGGCTCCTAACTCTGTGCCAGCAGGAGCGGTAATACAGA  
GGCCCCAAGCGTTACCCGGAATTATTGGGCGTAAAGGGTGTGTAGGTGGTTGTGTTAGTC  
TTCCGTAAAAGCTCTGGGGCTTAACCCCGGAAGTGCAGGAGGAAACGGCACGACTTCGAGG  
GCGCGAGAGGTAAAGGGAACCCATGGTGTAGGGGTGAAATCCGTTGATATCATGGGGAAC

ACCAAATGCGAAGGCACTTTACTGGCGCGTTTTCTGACACTGAGACACGAAAGCGTGGGTA  
GCGAATGGGATTAGAAACCCCTGTAGTCC  
>Otu16890  
CCAGCCTACGGGGGGCACCAGTCGGGAAAACCTTCGCAATGCACGCAAGTGTGACGAGGGG  
GTTCTCAGTGCTTAGGTTATACCTAGGCTTTTGCCAAGACCAAGACTCTTGGCGAATAAG  
TGGTGGGCAAGACTGGTGCCAGCCGCCGCGGTAACCCAGCGCCACGAGTGGGAATCGCT  
TTTATTGGGTCTAAAGCATCCGTAGCCGGTCTGTTAAATGTTCTGTGAAATCGTGGAGCT  
TAACTTCACGGTGTGCAGAGCACACTGACAGACTTGGGACCAGGAAAGGTATTTCGGTATT  
CCAGGGGGAGCGGTAAAATGTGATAATCCTTGGAGGACCACCAATGGCGAAGGCAGAATA  
CTAGAATGGATCCGACGGTGAGGGATGAAAGCTAGGGGAGCGATCCGGATTAGATACCCG  
CGTAGTCC  
>Otu16897  
CCAGCCTACGGGTCGCAGCAGTGGGGAATATTGGACAATGGGGGCAACCCTGATCCAGCA  
ATGCCGCGTGGGTGATGAAGGCCTTCGGGTTGTAAAGCCCTTTCGGCGGGGAAGATGATG  
ACGGTACCCGCGAGAAGAAGCCCCGGCTAATTTTCGTGCCAGCAGCCGCGGTAATACGAAGG  
GGGCTAGCGTTGTTTCGAATCACTGGGCGTAAAGCGTACGCAGGCGGATTGATAAGTCAG  
GGGTGAAATCCCGGAGCTCAACTTCGGAATTGCCTTTGATACTGTCTATCTTCGAGTTTCG  
GGAGAGGTTGGCGGAATTCCTAGTGTAGAGGTGAAATTCGTAGATATTAGGAAGAACACC  
AGTGGCGAAGGCGGTCAACTGGCCCGATACTGACGCTCATGTGCGAAAGCGTGGGGAGCA  
AACAGGATTAGAACCTCGTAGTCC  
>Otu16899  
CCAGCCTAGACGCACCAGTGAGGAATATTGGTCAATGGGCGCAAGCCTGAACCAGCCATC  
CCGCGCGCAGGAAGAAGGCGCTATGCGTCGTAAACTGCTTTTCCAGGGGAAGAAAACCCG  
TTACGAGTAACGGCTTGCCGGTACCCTGAGAATAAGGATCGGCTAACTCCGTGCCAGCAG  
CCGCGGTAATACGGAGGATCCAAGCGTTATCCGGATTTATTGGGTTTAAAGGGTGCCTAG  
GCGGCTTTTTTAAGTCAGGGGTGAAAGACGGTAGCTTAACTATCGCAGTGCCTTTGATACT  
GAAGAGCTTGAATGAACTAGAGGTAGGCGGAATGTGACAAGTAGCGGTGAAATGCATAGA  
TATGTACAGAACACCAATTGCGAAGGCAGCTTACTATGGTTCGATTGACGCTGAGGCAC  
GAAAGCGTGGGGATCAAACAGGATTAGAAACCCAGTAGTCC  
>Otu16914  
CCAGCCTACGGGAGGCACCAGTCGAGAATCTTCCGCAATGGACGAAAGTCTGACGGAGCG  
ACGTTTTCTGTGGATGATGAAGCCCTTTGGGGTGTAAGTCCTTTTATGTGGGAGGAAGCGC  
AAGCAGACAGTACCACATGAATAAGAGGGTCCTAATTCTGTGCCAGCAGGAGCGGTAATA  
CAGAACCTTCGAGCGTTACCCGGATTTATTGGGCGTAAAGGGTCCGTAGGTGGCGTAGTA  
AGTTGAAAGTTAAAATTCATCGGCTCAACCTTTGAACTGCTTTCAAACTGCTACACTAG  
AGGGCGTTAGGGGTTAGCGGAACCGACAGAGTAGGGGTGAAATCCGTTGATATTGTCGGG  
AACACCAAAAGCGAAGGCAGCTAACTAGGACGACCCTGACACTGAGGGACGAAAGCGTGG  
GGAGCAAAAAGGATTAGAAACCCAGTAGTCC  
>Otu16918  
GGACTACGCGGGTCTCTAATCCTGTTTGCTCCCCACGCTTTCGTGCCTCAGTGTGAGTCA  
TGGTCCAGGACGCCGTCTACACCGCAGGTGTTCTCTGATATCTACGCATTTACCCGCT  
ACACCAGGAATTCCACGTCCCTCTCCACACTCTAGTCGACCAGTTTTTCGGCGCACCCCTC  
CCAGTTAAGCCAGGAGATTTACACCAAACTTAGCCAACCACCTACGCACTCTTTACGCC  
CAGTAATTCCGAACAACGCTTGCTGCCTACGTATTACCGCGGCTGCTGGCACGTAGTTAG  
CCGCAGCTTCTTCTCCGGGTACCGTCATAATCTTCCCCGTCGAAAGAGCTTTACACCCCG  
AAGGGCTTCATCGCTCACGCGCATGGCTGGATCAGGCTTGCGCCCATTGTCCAATATTC  
CCCACTGCTGCGACCCATAGGCTGG  
>Otu16921  
CCAGCCTACGGGGTGCTGCAGTCGAGAATATTCCCAATGGACGAAAGTCTGAGGGAGCG  
ACGCCGCGTGCAAGGAAGAAACCCCTCGGGGCGTAAACTGCTTTTCTCTGGGAATAACCCCT  
GAAGGTACCAGAGGAATAAGAGGCTGCTAACTTCGTGCCAGCAGCAGCGGTAATACGAAG  
GCCTCAAGCGTTATCCGGATTTATTGGGCGTAAAGAGTTCAACGGCGGTTTGGAACGTTT  
CTGGTCAAATTGCATCGCTCAACGGTGCAACTGCTGGGAAAACGGCCAGACTCGAGCCTG  
GGAGAGGCAGACGGAATTGTGCGGTGTAGTAGTAAAATGCGCTAATATCGACAAGAACACC  
AATAGCGAAGGCAGTCTGCTGGAACAGTGCTGACGCTTCACGAACGAAAGCGTGGGGAGC  
GATACGGATTAGAGACCCGCGTAGTCC  
>Otu16933  
CCAGCCTACGGGAGGCTGCAGTCGAGAATCTTCGGCAATGGGCGCAAGCCTGACCGAGCG

ACGCCGCGTGTGGGATGAAGGCCCTCGGGTTGTAAACCGCTGTCAGAGGGAAAGAAAGTGC  
TGGGGGGTTCTCCCTTCAGTTTGACTGACCCTCAGAGGAAGTACGGGCTAAGTTTCGTGCC  
AGCAGCCGCGGTAAGACGAACCGTACGAACGTTACTCGGAATCACTGGGCTTAAAGGGTG  
CGTAGGCTGTCCGTAAGTTGGGTGTGAAATCCCTCGGCTCAACCGAGGAATTGCGCCCA  
AACTGTTCGGACTTGAGGGAGACAGAGGTGAGCGGAACCTAGGGTGGAGCGGTGAAATGC  
GTTGATATCCTAAGGAACACCAGTGGCGAAAGCGGCTCACTGGGTCTTTTCTGACGCTGA  
GGCACGAAGACTAGGGGAGCGAACAGGATTAGATACCCGAGTAGTCC

>Otu16939

CCAGCCTACGGGGGGCAGCAGGCGCGAAAACTTTACAATGCGAGAAATCGTGATAAGGGA  
ACTCTGAGTGCCCGTAAATTCGGGCTGTCCATCAGCTTAAATAACTGGTGAAGAAAGGGC  
CGGGCAAGACCGGTGCCAGCCGCCGCGGTAATACCGGCGGCTCGAGTGGTGGCCACTATT  
ACTGGGCTTAAAGCGTTCGTAGCTGGTTTGTAAAGTCTCTGGGGAAATCTTCCGGCTTAA  
CCGGAAGGCGTCTCAGGGATACTGGCAGACTAGGGACCGGGAGAGGTGAGAGGTACTCCA  
GGGGTAGGAGTGAAATCCTGTAATCCTTGAGGGACCGCCAGTGGCGAAGGCGTCTTGCTA  
GAACGGGTTCGACGGTGAGGGACGAAAGCTAGGGGCACGAACCGGATTAGAAACCCTGGT  
AGTCC

>Otu16954

CCAGCCTACGGGGGGCAGCAGTCTAGAAAAATTGGGCAATGGGCGCAAGCCTGACCCAGCG  
ACACCGCGTGAGGATGAAGGTCTTCGGGTGTAAACTCCTGTCAGGCGGAACGATGCTT  
CATGCACTAACTACGCATGTGGTGACGGTACTGCCAAAGGAAGCCCCGGCTAACTACGTG  
CCAGCAGCCGCGGTAATACGTAGGGGGCGAGCGTTGTCCGGAATTACTGGGCGTAAAGGG  
TGTGCAGGCGGTAAAGTAAGTCAGTGGTGAAAGCTCCGGGCTTAACTCGGAAATCGCCCC  
TGATACTACTTAACTTGAGGACGGGGGAGGTGATTGGAACTTTCGGTGTAGCGGTAGAAT  
GCGTAGATATCGAAAGGAACGCCGATAGCGAAGGCAAATCACTGGAACGTTTCTGACGCT  
GAAACACGAAAGCTGGGGGAGCAAACAGGATTAGATACCCGAGTAGTCC

>Otu16955

CCAGCCTACGGGAGGCAGCAGTGAGGAATTTTTCGCAATGGCCGCAAGGCTGACGCAGCA  
ACGCCGCGTGGGTGATGAAGGCCCTTCGGGTGTAAGCCCTGTCAGGTGGGAAGAAAAGT  
TCTGCCAAGAAACGGGTGGGATTTGACGGTACCACCAGAGGAAGCACCGGCTAACTCCGT  
GCCAGCAGCCGCGGTAATACGGAGGGTGCGAGCGTTATTTCGGAATTACTGGGCGTAAAGC  
GCGTGTAGGCGGGGATGCAAGTCTGATGTGAAAGCCCTGGGCTTAACCTGGGAAGTGCAT  
TGGAACCTGCATTTCTTGAGTACTGGAGAGGAAGGGGGAATTCCCGGTGTAGAGGTGAAA  
TTCGTAGAGATCGGGAGGAATACCAGTGGCGTAAGCGCCCTTCTGGACGTTACTGACGC  
TCATATGCGAAAGCTAGGGTAGCAAACGGGATTAGAAACCCAGTAGTCC

>Otu16960

CCAGCCTATGGGTTGCTGTCAGCAACGAATATTCCGCAATGGGCGAAAGCCTGACGGAGCG  
ACGCCGCGTGAGGGATGAAGTCCCTTCGGGATGTAAACTTCAATAGTACATGAGGAACCA  
ATCTTGGCTAATATCCAAGAAAGTTGACCAGCGTACGAAAGGAGCGGCTAACTCCGTGCC  
AGCAGCCGCGGTAATACGGAGGCCCGGAGCGTTGTTCGGAATCACTGGGCTTAAAGCGCG  
TGTAGGCGGAACGTAAGTACTGTGTGAAATCCCCGGCTTTAATCCAGGAAGTCTTGGT  
ATACTGCCGTTCTTGAGGCAGGTAGGGGTCACTGGAACCTTAGGTGGAGCGGTGAAATGC  
GTAGATATCTAAGGGAACGCCCTGTGGCGAAAGCGGGTGACTGGGCCTGTCCTGACGCTGA  
GACGCGAAAGCGTAGGGAGCAAACGGGATTAGAGACCCGGTAGTCC

>Otu16968

CCAGCCTATGGGGTGTCAGCAGTGGGGAATATTGGACAATGGGGGCAACCCTGATCCAGCG  
ACGCCGCGTGGGTGAAGAAGGCCTGCGGGTTGTAAAGCCCTTTTCGTTGGGGAAGAAAAGT  
TTCGACCTAACACGTCGGGACCTTGACGTTACCCAAAGAAGAAGCACCGGCTAACTCTGT  
GCCAGCAGCCGCGGTAATACAGAGGGTGCGAGCGTTAATCGGAATTACTGGGCGTAAAGC  
GCACGTAGATGGCTTTGTAAAGTCGGATGTGAAATCCCCGGGCTCAACCTGGGAAGTGCAT  
TCGAAACTGCATTGCTCGAATGTGGAAGAGGGAAGCGGAATTCAGGTGTAGCGGTGAAA  
TGCGTAGATATCTGGAGGAACACCGGTGGTGTAGACGGCTTTCTGGACCGTAACTGACGC  
TGAGACACGAAAGCGTGGGTAGCAAACAGGATTAGATACCCTAGTAGTCC

>Otu16977

CCAGCCTATGGGGGGCAGCAGTGAGGAATATTGGTCAATGGGCGCAAGCCTGAACCAGCC  
ATCCCGCGTGCAAGGAAGACGGCGCTATGCGTTGTAAACTGCTTTTCCAGGGGAAGAAAAC  
CCACGACGCGTCGTGGCTTGCCGGTACCCTGGGAATAAGCATCGGCTAACTCCGTGCCAG  
CAGCCGCGGTAATACGGAGGATGCGAGCGTTATCCGGATTTATTGGGTTTAAAGGGTGCG  
TAGGCGGATTAATAAGTCAGTGGTGAAAACCTTCAGCTTAACTGGAGACTTGCCATTGAT

ACTGTTAGTCTTGAATTTTGTCTGAGGTAGGCGGAATAAGTCATGTAGCGGTGAAATGCAT  
AGATATGACTTAGAACACCAATTGCGAAGGCAGCTTACTAAGCAAATATTGACGCTGAGG  
CACGAAAGCGTGGGGATCAAACAGGATTAGAGACCCGAGTAGTCC

>Otu16983

CCAGCCTATGGGTGTCAGCAGTCGAGAATCTTCGTCAATGGGCGAATGCCTGACGCAGCG  
ACGCCGCGTGTGGGATGACGGCCTTCGGGTGTAAACCACTGTCGGAGGGGACGAAGGCC  
CGGCGGCGAATAGCCGACCGGATTGACGGTACCCTCAAAGGAAGCACCGGCTAACTCCG  
TGCCAGCAGCCGCGGTAATACGGAGGGTGCAGCGTTGTCCGGAATCACTGGGCGTAAAG  
GGTGCCTAGGCGGCTAGGTAAGTCACGTGTGAAAGGCCGGGGCTCAACCCCGGATCGGCA  
TGTGAGACTGTCTGGCTCGAGCATGGTAGAGGCGGGCGGAATTCCTGGTGTAGCGGTGGA  
ATGCGTAGAGATCAGGAAGAACACCGGTGGCGAAGGCGGCTCGCTGGGCCATTGCTGACG  
CTGAGGCACGAAAGCGTGGGGAGCAAACAGGATTAGAAACCCTCGTAGTCC

>Otu16987

CCAGCCTACGGGTGTCAGCAGTAGGGAATATTGGTAATCTGCGAAAGCGGGAACCAGCAA  
CGCCGCGTGTGCGATGAAGGCCTTCGGGTGCTAAAGCACTTTTTGAGGGGATGAGGAAGG  
ACAGTACCCTCAGAATAAGTCTCGGCTAACTACGTGCCAGCAGCCGCGGTAAAACGTAGG  
AGACGAGCGTTATCCGGATTTACTGGGCGTAAAGCGCGTGCAGGCGGTTTCGGCAAGTTGG  
ATGTGAAAGCTCCTGGCTCAACTGGGAGAGGTCGTTCAAAACTACCGAACTAGAGGATGG  
TAGAGGGAGGTGGAATTCCGGGTGTAGTGGTGAATGCGTAGATATCCGGAGGAACACCA  
GTGGCGAAAGCGGCCTCCTGGACCATTCTGACGCTCAGACGCGAAAGCTAGGGTAGCGA  
ACAGGATTAGATACCCGCGTAGTCC

>Otu17013

CCAGCCTATGGGGCGCTGCAGTGGGGAATTTTGCTCAATGGGCGCAAGCCTGAAGCAGCG  
ACGCCGCGTGAATGATGAAGTCTTTCGGGATGTAAAGTTCTGTGTCAGCAGGGACAATTATG  
ATGGTACCTGCAGAGGAAGGACCGGCAAACATATGTGCCAGCAGCCGCGGTAATACATAGG  
GTCCAAGCGTTGTCCGGATTTACTGGGCGTAAAGAGCGTGTAGGTGGTGAACAAGTCAA  
ACTTGAAATGCCCTTGGCTTAACCAGGGTATGAGTTTGATACTATTTTCGCTGGAGATTGG  
GAGAGGAAAGTGGAACAAACAGTGTAGCGGTGAAATGCGTAGATATTGTTTGGAACACCC  
ATGGCGAAGGCAGCTTTCTGGACCAATTCTGACACTGAGACGCGAGAGCGTGGGGAGCAA  
ACAGGATTAGAAACCCCGGTAGTCC

>Otu17019

CCAGCCTATGGGTGGCACCAGTCGAGAATATTCCGCAATGGGCGAAAGCCTGACGGAGCG  
ACGCCGCGTGGAGGAAGAAGTCCTTCGGGATGTAAACTCCTTTTGCGAACTAGTAAGTTA  
TTGAACAGTTCGAGAATAAGAGGTTGCTAAACTCGTGCCAGCAGCAGCGGTAATACGAGT  
GCCTCAAGCGTTATCCGGAATTATTGGGCGTAAGGGGTGTGTAGGTTGTTTTGTTAGTCT  
TTTGTTAAATTCTTCGGCTCAACCGGGGACATGCAAAGGAAACGGCAAAGCTTTAGAGGG  
TGCGAGGGGTCTGTGGAACCTAGGTGTAGCGGTAAAATGCGTTGATATCTAGGGGAACA  
CCAAAAGCGAAGGCAGCAGACTGGAGCATTCCTGACACTGAAACACGAAAGCGTGGGTAG  
CGAATGGGATTAGATACCCCGTAGTCC

>Otu17026

CCAGCCTATGGGTGTCAGCAGTAAGGAATCTTCCGCAATGGGCGAAAGCCTGACGGAGCA  
ACACCGCGTGGAGGATGAAGGCGTTTTTCGTTGTAAACTCCTTTTCTGAGGGAATAACTCT  
GAAGGTACCTCAGGAATAAGCAACGGCTAACTACGTGCCAGCAGCCGCGGTAAGACGTAG  
GTTGCGAGCGTTATCCGGAATTATTGGGCGTAAAGCGTCAGTAGGTGGTTTGTTAAGTTG  
GATGTTAAAGCTCGGAGCTCAACTCCGATCATGTGTCCAAAACCTGGCAGGCTAGAGACAG  
GTAGAGGCAAGTGGAATTCTGTATGTAGGGGTAATATCCGTAGATATACAGAGGAACACC  
AAAAGCGAAGGCAGCTTGCTGGACCTGTTCTGACACTCAATGACGAAAGCGTGGGGAGCA  
AACGGGATTAGAAACCCCGTAGTCC

>Otu17027

CCAGCCTACGGGATGCTGCAGTGGGGAATATTGGACAATGGGCGCAAGCCTGATCCAGCC  
ATGCCGCGTGAGTGATGAAGGCCCTAGGGTTGTAAAGCTCTTTTGTGCGGGAAGATAATG  
ACGGTACCGCAAGAATAAGCCCCGGCTAACTTCGTGCCAGCAGCCGCGGTAATACGAAGG  
GGGCTAGCGTTGCTCGGAATCACTGGGCGTAAAGGGTGCCTAGGCGGGTCTTTAAGTCAG  
GGGTGAAATCCTGGAGCTCAACTCCAGAACTGCCTTTGATACTGAGGATCTTGAGTACGG  
GAGAGGTGAGTGGAACCTGCGAGTGTAGCGGTGAAATGCGTAGAGATCGACCAGAACACCG  
GTGGCGAAGGCGGGTCTCTGGACAGTTCTTGACGCTCAGGCACGAAAGCGTGGGGAGCGA  
ACAGGATTAGAAACTCTTGTAAGTCC

>Otu17029

CCAGCCTATGGGGGGCACCAGCGGGGAATATTGCGCAATGGGGCGAAAGCCTGACGCAGCA  
ACGCCGCGTGGGGGATGAAGTCCCTTGGGATGTAAACTCCTTTTCGACCGGGACGATAATG  
ACGGTACCGGTGGAAGAAGCCCCGGCTAACTCTGTGCCAGCAGCCGCGGTAATACAGAGG  
GGGCGAGCGTTGTTTCGGAATTATTGGGCGTATAGGGCGCGTAGGCGGTGCGGTAAGTCTT  
TTGTGAAATCTCCGGGCTCAACTCGGAGTCTGCAGGAGAACTGCCGTGCTTGAGTGTGG  
GAGAGGTGAGTGGAATTCCTGGTGTAGCGGTGAAATGCGTAGATATCGGGAGGAACACCT  
GTGGCGAAAGCGGCTCACTGGACCACAACCTGACGCTGAGGCGCGAAAGCTAGGGGAGCAA  
ACAGGATTAGAAACCCGTGTAGTCC

>Otu17032

CCAGCCTATGGGTGTCAGCAGTGAGGAATATTGCGCAATGGGGGCAACCCTGACGCGGCAA  
CGCCGCGTGAGTGAGGAAGGTTTTTCGACCGTAAAGCTCTGTGAGCGGGAAGAAATGTA  
TAATGGCTAATATCCATTATACTTGACGGTACCGCTAAAGGAAGCACCGGCTAACTCCGT  
GCCAGCAGCCGCGGTAATACGGGGGGTGCAAGCGTTGTTTCGGAATCATTGGGCGTAGAGA  
GCGTGTAGGCGGCTGGATAAGTCAGATGTGAAAGCCCTGGGCTTAACCCAGGAAGTGCAT  
TTGAAACTGTTTCAGCTGGAGTAAGGGAGAGGAAAGTGGAATTCCTGGTGTAGAGGTGAAA  
TTCGTAGATATCAGGAGGAACACCGGTGGCGAAGGCGACTTTCTGGCCCTATACTGACGC  
TGATGCACGAAAGCTAGGGGAGCAAACAGGATTAGAAACCCAGTAGTCC

>Otu17033

CCAGCCTACGGGAGGCAGCAGTAACGAATCTTCCGCAATGCACGAAAGTGTGACGGAGCG  
ACGCCGCGTGAGGAGCAAGTCTTTCGGAATGTAAACTCCTGTCAGGGGTTAGAAAGTTC  
TGATCAACCCAGAGGAAGGCACGGCTAACTCTGTGCCAGCAGCCGCGGTAAGACAGAGG  
TGCCGAGCGTTAGGCGGAATCACTGGGCTTAAAGCGTGTGTAGGTGGACTGGTAAGTACC  
TTGTGAAATCCCCCGGCTCAACCGAGGAACTGCTTGGTATACTGCTGGTCTTGAGCAACC  
TAGGGGCGAGCGGAACAAATGGTGGAGCGGTGAAATGCGTAGATATCATTTGGAACGCCA  
ATGGTGAAAACAGCTCGCTGGGGGTTAAAGGAAGGCGAAAGCCTTCCCCGCTGACACTGA  
GACACGAGAGCTAGGGGAGCAAACGGGATTAGAAACCCGAGTAGTCC

>Otu17042

CCAGCCTACGGGTCGCTCCAGTGGGGAATATTGGGCAATGGGCGCAAGCCTGACCCAGCG  
ACGCCGCGTGGGCGATGAAGGCCCTTCGGGTTGTAAAGCCCTGTCGTGTGAAAGAACAAC  
CCAAGGGTGAATAGCCCTTGGGATTGACGGTACCACAGGAGGAAGCACCGGCTAACTCCG  
TGCCAGCAGCCGCGGTAATACGGAGGGTGCAAGCGTTGTTTCGGAATTACTGGGCGTAAAG  
GGCGTGTAGGCGGTAGTGATAGTCAGATGTGAAATCCTTCGGCTCAACCGGAGAAGTGA  
TCTGAAACTTCACAACCTCGAGTACAGAAGAGGGGAAACGGAATTCCCGGTGTAGAGGTGAA  
ATTCGTAGATATCGGGAGGAACACCAGTGGCGAAGGCGGTTTCCTGGTCTGACACTGACG  
CTGAGGCGCGAAAGCATGGGGAGCAAACAGGATTAGATACCCTAGTAGTCC

>Otu17050

CCAGCCTATGGGTGGCTGCAGTCGGGAAAAATTTTGCAATGCGCGAAAGCGTGACAGAGCG  
AGCCAGAGTGCTTTTCTATATTTGAAAAGCTTTTTCGGGATGTAAAAAGTCTCGTGAATA  
AGGACCGGGCAAGACTGGTGCCAGCCGCCGCGGTAACCCAGCGGTCCAAGTCGCAGCCA  
CAATTATTGGGTCTAAAACATCCGTAGCTTGCTTCGTAAGTCTCTTGTGAAATCTGGCCT  
CTTAAGGGTTCGGTCGTGCAAGAGATACTGCAAAGCTAGAGACCGGGAGGCGTAAGAAATA  
CTAATAGGGTAGCGGTAAAATGCGTTGATCCTATTAGGACTAACAATCGCGAAGGCATCT  
TACGAGAACGGATCTGACAGTGAGGGATGAAGGCTAGGGGCGCAAAGTGGAATTAGAGACC  
CCAGTAGTCC

>Otu17059

CCGCCTACGGGGGGCAGCAGTGAGGGAATATTGTGCAATGGGGGAAACCCTGACACAGCGA  
CGCCGCGTGAGGATGAAGGCCCTTCGGGTTGTAAACTCCTGTCAGAGGGGACGAAATTAT  
CGTTTAATAAACGGTATTGACTTAACCCTCAGAGGAAGCACCCGCTAACTCCGTGCCAGC  
AGCGGCGGTAATACGGAGGGTGCGAACGTTGTTTCGATTACTGGGCGTAAAGAGTTCGT  
AGGCGGTTGAGATTAATTAGACGTGAAAGCCTCCGGCTTACCCGGAGAATAGCATCTAAT  
ATTACTTGACTGGAGTGTGAAAGAGGAAAGTAGAATTGTAGGTGGAGCGGTGAAATGCGT  
AGATATCTACAGGAATACCGGATGCGAAGGCGACTTTCTAGTTCACTACTGACGCTGAGG  
AACGAAAGCTAGGGGATCAACAGGATTAGATACCCCTGTAGTCC

>Otu17079

CCAGCCTACGGGAGGCAGCAGTAAGGAATATTGGACAATGGGCGCAAGCCTGATCCAGCC  
ATGCCGCGTGACAGGAAGACGGTCCTATGGATTGTAAACTGCTTTTGTACGGGAAGAAACA  
CTCCTACGTGTAGGAGCTTGACGGTACCGTAAGAATAAGGATCGGCTAACTCCGTGCCAG  
CAGCCGCGGTAATACGGAGGATCCAAGCGTTATCCGGAATCATTGGGTTTAAAGGGTCCG

TAGGCGGTTTTAGTAAGTCAGTGGTGAAAGCCCATCGCTCAACGATGGAACGGCCATCGAT  
ACTGCTAGACTTGAATTATAAGGAAGTAACTAGAATATGTTGTGTAGCGGTGAAATGCTT  
AGATATTACATGGAATACCAATTGCGAAGGCAGGTTACTACTTATGGATTGACGCTGATG  
GACGAAAGCGTGGGGAGCGAACAGGATTAGAAACCCTTGTAGTCC

>Otu17089

CCAGCCTACGGGGTGCTGCAGGGAGGAATATTGGGCAATGGGCGAAAGCCTGACCCAGCA  
ACGCCGCGTGAGGATGAAGGCCTTCGGGTGTAACTCCTTTTGAGGGAGACGAGAAAG  
GACGGTATCCCTAGAATAAGCCACGGCTAACTACGTGCCAGCAGCCGCGGTAAAACGTAG  
GTGGCGAGCGTTATCCGGATTCAATTGGGCGTAAAGAGCTTGTAGGTGGCTTCGCAAGTTG  
GACGTGAAATCTCCGGGCTTAACTTGGAGACGCCGTTCAATACTGCGAGGCTAGAGGATG  
TCAGAGGGAAGTGGAATTCCTGGTGTAGCAGTGAAATGCGTAGATATCAGGAGGAACACC  
CGTGGCGAAGGCGGCTTCCTGGGGCATTCCTGACACTGAGAAGCGAAAGCTAGGGGAGCA  
AACGGGATTAGAAACCCTAGTAGTCC

>Otu17111

CCAGCCTACGGGGTGCGAGCAGTTGCGAAAAATCCGCAATGCGCGAAAGCGTGACGGGGGA  
ATTCTGAGTGCTTCTCTTATAGAGGAGCTTTTGCCAGGCCGAATCCCTGGGAGAATAAG  
TAGTGGGTAAATCTTGTGCCAGCCGCCGCGGTAAATACAAGTAGTACAAGTGGTATCCGTG  
AATATTGGGCTTAAAGCGCCCGTAGCGGGCTCGGCAAGTTCTCTGTGAAATCTTCAAGCT  
CAACTTGAAGGCGTGAGGGAATACTACCGGGCTTGGGAGTGGGGGAGGCCAAGGGTACT  
GCAGGGGGAGGAGTAAAATCCTGTAATCCTTGCATGACCTTCAGTAGCGAAAGCGCTTGG  
CCAAAACACGTCCGACCGTGAGGGGGCGAAGGCTAGGGGAGCAAATCGGATTAGATACCCT  
CGTAGTCC

>Otu17120

CCAGCCTACGGGTGGCTGCAGCAACGAATATTCCGCAATGGGCGAAAGCCTGACGGAGCG  
ACGCCGCGTGAGGATGAAGTCCTTCGGGATGTAACTCCAATAGTTTGTGAGGAAGTGA  
GGCGACCTAATACGTCGCCGAGTTGACCAGCGAACGAAAGGGACGGCTAACTCCGTGCCA  
GCAGCCGCGGTAAAGACGGAGGTCCTAGCGTTGTTCCGAATTACTGGGCTTAAAGCGCGT  
GTAGGCGGAACGGTGAGTACCTTGTGAAATCCCCGGTCTCAAGCCGGGAAGTGTCTCGGTA  
TACTATCGTTCTTGAGGCAGGTAGGGGTCACTGGAACCTTAGGTGGAGCGGTGAAATGCG  
TAGATATCTAAGGGAACGCCTGTGGCGAAAGCGGGTGACTGGGCCTGTCTGACGCTGAG  
ACGCGAAAGCGTAGGGAGCAAACGGGATTAGAGACCCCGGTAGTCC

>Otu17136

CCAGCCTATGGGGGGCTGCAGTGGGGAATTTTGCGCAATGGACGAAAGTCTGACGCAGCA  
ACGCCGCGTGGGTGATGAAGGTCTTCGGATTGTAAACCCTGTCGTCAGGGACGAGGGTT  
GTGTTCTTAATAAGGATGCAGCTTGACGGTACCTGGAGAGGAAGCCCCGGCTAACTCTGT  
GCCAGCAGCCGCGTAATACAGAGGGGGCAAGCGTTATTCGGAATTATTGGGCGTAAAGG  
GCGCGTAGGCGGTTCTGTAAAGTAGGATGTGCAATCCCCGAGCTCAACTTGGGAACTGCAT  
CCTAGACTGCAAGACTAGAGTGCTGGAGAGGGTGGTAGAATTCCACGTGTAGCGGTGAAA  
TGCGTAGAGATGTGGAGGAATACCAGTGGCGAAGGCGGCCACCTGGACAGTAAGTACGC  
TGAGGCGCGAAAGTGTGGGTAGCAAACAGGATTAGATACCCAGTAGTCC

>Otu17139

CCAGCCTATGGGGTGCGAGCAGTGGGGAATCTTGCACAATGGGGGCAACCCTGATGCAGCG  
ACGCCGCGTGAGCGATGAAGCCCTTCGGGGTGTAAGCTCTTTTCGACAGGAACGATAATG  
ATGGTACCTGGAGAAGAAGCTGCGGCTAACTACGTGCCAGCAGCCGCGGTAAATACGTAGG  
CAGCGAGCGTTGTTTCGGAGTTACTGGGCGTAAAGAGTATGTAGGCGGTTTCCAAGTCTG  
GTGTGAAATCTCCCGGCTCAACTGGGAGGGTGCGCCGGAAGTGGGAGGCTCGAGCGTG  
GAGAGGAAAGCGGAATTCCTGGTGTAGCGGTGAAATGCGTAGATATCAGGAGGAACACCG  
GCGGTGTAGACGGCTTTCTGGACCACGGCTGACGCTGAGATACGAAAGCGTGGGTAGCAA  
ACAGGATTAGAGACCCTTG TAGTCC

>Otu17145

CCAGCCTATGGGGCGCACCAGGGAATATTGGGCAATGGGCGAAAGCCTGACCCAGCAACG  
CCGCGTGACGATGAAGGTCTTCGGATCGTAAAGTGCTTTTCTGAGAGATGAGAAAGGAC  
AGTAACTCAGGAATAAGTCTCGGCTAACTACGTGCCAGCAGCCGCGGTAAACACGTAGGAG  
GCAAGCGTTATCCGGATTTACTGGGCGTAAAGCGCATGCAGGTGGTTTCGGTAAGTTGGAT  
GTGAAAGCTCCTGGCTCAACTGGGAGAGGTGCTTCAATACTACCGGACTTGAGAGCAGTA  
GAGGGAGGTGGAATTCCTGGTGTAGTGGTGAAATGCATAGATATGACACAGAACACCGAT  
TGCGAAGGCAGCTGACGAAACTGTAAGTACGCTGAGGCACGAAAGCGTGGGGATCAAAC  
AGGATTAGAGACCCGGGTAGTCC



>Otu17151

CCAGCCTATGGGATGCAGCAGTGGGGAATATTGGACAATGGGCGAAAGCCTGATCCAGCA  
ATACCGCGTGTGCGATGAAGGTCTTCGGATTGTAAAGCACTTTTAATTGGAAAGAGGGTT  
GGCGTACTAATACTACGACCAATTGACGTTACCGATAGAGAAAGCACCGGCTAACTCTGT  
GCCAGCAGCCGCGGTAATACAGAGGGTGCAAGCGTTAATCGAAATAACTGGGCGTAAAGA  
GCACGTAGGCGGGAGAATAAGTTGTGTGTGAAAAATCGGGGCTCAACCTCGGGACTGCAC  
ACAATACTGTTTTTCTAGAGTTTGGCAGAGGTAAGTGGAATTTCCGGTGTAGCGGTGAAA  
TGCATAGATATCGGAAGGAACACCAGTGGCGAAGGCGGCTTACTGGGCCAACACTGACGC  
TGAGGTGCGAAAGCGTGGGGAGCAAACAGGATTAGAGACCCTAGTAGTCC

>Otu17153

CCAGCCTATGGGTTGCTGCAGTCGAGAGGCTTCGGCAATGGGGGAAACCCTGACCGAGCG  
ACGCCGCGTGGGGGATGAAGGCCTTCGGGTGTAAACCCCTGTCGTGCGGGGAGAAAGAT  
TTGGCGGCAAACAGTCGTCGGATCCTGACGGTACCGCAAAGGAAGCTCCGGCTAACTCC  
GTGCCAGCAGCCGCGGTAATACGGGGGAGCAAACGTTGTTTCGGAATCACTGGGCGTAAA  
GGGCGCGCAGGCGGCCTCGTAAGTGGGATGTGAAAGCCCCCTGGCCCAACCAGGGAAATGC  
GTCTCATACTGCGGGGCTTGAGTGCAGAAGAGGATGGGGGAATTCCTGGTGTAGCGGTGA  
AATGCATTGATATCGGGAGGAACACCAGTGGCGAAGGCGCCCATCTGGTCTGCTACTGAC  
GCTCAGGCGCGAAAGCCGGGGGAGCAAACAGGATTAGATACCCGAGTAGTCC

>Otu17165

CCAGCCTACGGGTGGCTCCAGTGGGGAATCTTGACACAATGGGGGAAACCCCGATGCAGCG  
ACGCCGCGTGAGCGACGAAGCCCTTCGGGTGTAAAGCTCTTTCGGCAGGGAAGATAATG  
ACGGTACCTGCAGAAGCAGCTGCGGCTAACTACGTGCCAGCAGCCGCGGTAATACGTAGG  
CAGCAAGCGTTGTTTCGGAGTTACTGGGCGTAAAGGGTGTGTAGGCGGTTTGTCAAGTCAG  
TTGTGAAAGCCCCGGGCTCAACCTGGGAATGGCAATTGAGACTGACCGACTGGAGTGTA  
AAGAGGACCGTGGAATTCCTGGTGTAGCGGTGAAATGCGTAGAGATCGGGAAGAACACCG  
ATGGCGAAGGCAGCGGTCTGGGTTAACACTGACGCTGAGGTGCGAAAGCGTGGGGAGCAA  
ACAGGATTAGATACCCGCGTAGTCC

>Otu17179

CCAGCCTACGGGTCGCTGCAGTCGAGGAAAATTCTACAATGCTCGAAAGAGTGATAGAGCG  
AGCCAGAGTGTTTCTCATTTTTGAGAAACTTTTATCTGCTGTAAAAAGCAGATGAATAA  
GGACTGGGCAAGACCGGTGCCAGCCGCCGCGGTAATCCCGGCGGTCCAAGTCGCATCCGC  
AATTATTGGGTCTAAACATTCGTAGCTTGTGTTTGTAAAGTTTCTTGTGAAATCTTAAATC  
TTAAGTTTAAGGCGTGCAAGAAATACTACATTGCTAGAGACCGGAAGACGCAAAGAGTAC  
GAAGGAGGTAGCGGTAAATGTGTTAATCTTCTTCGGACTAACAACGGCGAAGGCACTTT  
GCGAGTACGGATCTGACAGTAAGGGATGAAGGCTAGGGGCGCAAAGGGATTAGATACCC  
CAGTAGTCC

>Otu17188

CCAGCCTATGGGACGCAGCAGTGAGGAATATTGGTCAATGGGCGCAAGCCTGAACCAGCC  
ATCCCGCGTGAAAGGAAGAGGGCGCTATGCGTTGTAAACTTCTTTTCCAGGGGAAGAAAAT  
TTCTATGTATAGGACTTGCCGGTACCTTGGGAATAAGCATCGGCTAACTCCGTGCCAG  
CAGCCGCGGTAATACGGAGGATGCAAGCGTTATCCGGATTTATTGGGTTTAAAGGGTGCG  
TAGGCGGATTAATAAGTCAGTGGTGAAAACCTGCAGCTTAACTGTAGACGTGCCATTGAT  
ACTGTTAGTCTTGAGTATGGTCAAGGTAGGCGGAATGTGTAATGTAGCGGTGAAATGCTT  
AGATATGACACAGAACACCGATTGCGAAGGCAGCTGACAAAACCTGTAAGTACGCTGAGG  
CTCGAAAGCGTGGGGATCAAACAGGATTAGATACCCTTGTAGTCC

>Otu17192

CCAGCTATGGGGGGCAGCAGTGGGGAATATTGGACAATGGGCGCAAGCCTGATCCAGCCA  
CGCCGCGTGAGTGATGAAGGCCTTCGGGTGCTAAAGCTCTGCGGAGAGGGACGAACCGCT  
GGATGTTTCATAGCATCCGGCATGACGGTACCTCTTTAGCAAGCACCGGCTAACTTCGTGC  
CAGCAGCCGCGGTAATACGAAGGGTGCAAACGTTGCTCGGAATTATTGGGCGTAAAGCGC  
ACGTAGGCGGTCTTATAAGTCGGACGTGAAATCCCTCGGCTCAACCGAGGAAGTGCATCC  
GAAACTGCAGGACTTGAGTACTTAAGAGGATCGCGGAATTCTTGGTGTAGAGGTGAAATT  
CGTAGAGATCAGGAGGAACACCAGTGGCGAAGGCGGCGATCTGGGAAGATACTGACGCTG  
AGGTGCGAAAGCGTGGGGAGCAAACAGGATTAGATACCCCGTAGTCC

>Otu17193

CCAGCCTATGGGGCGCACCAAGTCGAGAATTTTTTCAACAATGGACGAAAGTCTGATGTGCGG  
ACGCCGCGTGAGGGATGAAGGCGTTTTTCGTGCTAAACCTCTTTTGCCAATGTAGAGACGC  
ATTGGAGAATAAGCACCTGCTAATCTCGTGCCAGCAGCCGCGGTAATACGAGAGGTGCAA

GC GTTGTCCG GATTTATTGGGCGTAAAGCGTTTCTAAAGGCTCTTTTGTAAGTTATCTTT  
TAAAGACCAAAGCTCAACTTCGGGAAGGGAGATAATACTGCAAGAGTCGAGATATTTTCGG  
GGTACTAGAACTATTGGTGTAGGGGTGAAATCCGCTGATATCAATAGGAATTC CAAGGG  
CGAAGGCAGGTA ACTAGGAATTTTCTGACGCTGATGAACGAAAGCTAGGGGAGCGAAAGG  
GATTAGAACCCCA GTAGTCC

>Otu17194

CCAGCCTACGGGAGGCTCCAGTGGGGAATATTGGACAATGGGCGCAAGCCTGATCCAGCC  
ATGCCGCGTGTGTGATGAAGGCCTTCGGGTGTAAAGCACTTTTGGCGGGGACGATAATG  
ACGGTACCCGCGAGAATAAGCCCCGGCTAACTTCGTGCCAGCAGCCGCGGTAATACGAGGG  
GGGCGAGCATTGTTTCGGAATTACTGGGCGTAAAGGGTGCGTAGGCGGATCGATCAGTCAG  
ATGTGAAAGCCCAAGGCTCAACCTTGGAATTGCATTTGATGCTGTCAGTCTGGAGTATTG  
GAGAGGAGCGTGGAATTC CAGTGTAGAGGTGAAATTCGTAGATATTGGGAGGAACACCA  
GTGGCGTAGGCGACGCTCTGGCCAAATACTGACGCTGAGGCACGAAAGTGTGGGGAGCAA  
ACAGGATTAGAAACCCTTGTAGTCC

>Otu17205

CCAGCCTACGGGGGCGCAGCAGTGGGGAATCTTGACAATGGGCGAAAGCCTGATGCAGCG  
ACGCCGCGTGGGGGATGAAGCATTTCGGTGTGTAAACCCCTTTTCGACCGGGAAGAATGCC  
TCGCAAGAGGAGTGACGGTACCGGTATAAGAAGCCCCGGCTAACTACGTGCCAGCAGCCG  
CGGTAAGACGTAGGGGGCCAGCGTTGTTTCGGAATTACTGGGTGTAAAGGGTTCGTAGGCG  
GTGTGGCAAGTTGGGAGTGAAATCTCTGGGCTTAACCCAGAGGCTGCTTCCAAAAC TGCT  
GTGCTTGAGTGTGGGAGAGGTGCGTGGAATTGCAGGTGTAGCGGTGAAATGCGTAGATAT  
CAGGAGGAACACCTGTGGTGTAGACAGCTTACTGGACCATGACTGACGCTGAGGCACGAA  
AGCGTGGGTAGCAAACAGGATTAGAAACCCCGGTAGTCC

>Otu17212

CCAGCCTATGGGTGGCTCCAGTGGGGAATTTTGGACAATGGGGGCAACCCTGATCCAGCC  
ATGCCGCGTGAGTGAAGAAGGCCTTCGGGTGTAAAGCCCTGTGGGGAGAGACGAATAAG  
TCGGAGCCAATACCTCCGGCGATGACGGTACCTCCTTAGCAAGCACCGGCTAACTCTGTG  
CCAGCAGCCGCGGTAAGACAGAGGGTGCAAACGTTGTTTCGGAATTACTGGGCGTAAAGCG  
TGTGTAGGCGGCCGCGCAAGTCGGATGTGAAATCCCCGGGCTCAACCCGGGAAGTGCACC  
CGATACTGCGTGGCTCGAGTACCGGAGAGGTTGGTGGAATTTTCGGTGTAGAGGTGAAAT  
TCGTAGATATCGAGAGGAACACCGGTGGCGAAGGCGGCCAACTGGACGAGTACTGACGCT  
GAGACACGAAAGCGTGGGGAGCAAACAGGATTAGATACCCCGGTAGTCC

>Otu17214

CAGCCTATGGGTGCTCCAGTGGGGAATATTGGACAATGGGGGAAACCCTGATCCAGCAA  
TGCCGCGTGAATGATGAAGGCCCTCGGGTGTAAAGTTCTTTTCTCAGAGAAGATGATGA  
CGGTATCTGAGGAATAAGCACCGGCAAACCTTCGTGCCAGCAGCCGCGGTAATACGAAGGG  
TGCTAGCGTTGTTTCGGAATTACTGGGCGTAAAGGGCGCGTAGGCGGATAGTTAAGTTAGG  
TGTGAAAGCCCTCGGCTCAACCGAGGAACGGCACTTAAAACTGATTGTCTTGAGTGC GAA  
AGGGAGAGACGGAATGGCGAGTGGAGCAGTGAAATGCGTTGATATTCGTTGGAACACCGG  
TGGCGAAGGCGGTCTCTTGGTTTCGTAAC TGACGCTAAGGCGCGAAAGCGTGGGGAGCAA  
CAGGATTAGATACCCTCGTAGTCC

>Otu17219

CCAGCCTATGGGGGGCACCA GTGGGGAATTTTGGACAATGGTGGAACACTGATCCAGCC  
ATGCCGCGTGCAGGATGACAGCCCTATGGGTGCTAAACTGCTTTTGTACGGGAAAAAAC  
TCTTTACGTGTAAAGAGCTGATTGTACTGTAAGAATAAGGATCGGCTAACTCCGTGCCAG  
CAGCCGCGGTAATACGGAGGATCCAAGCGTTATCCGGATGCATTGGGTTTAAAGGGTGCG  
TAGGCGGAATGATAAGTCAGTGGTGAAAGCCTGTTGCTTAACAACAGAACTGCCATTGAT  
ACTGTCAATCTTGAGTACATTTGATGTGGGCGGAATGTGTCATGTAGCGGTGAAATGCTT  
AGATATGACACAGAACACCGATTGCGAAGGCAGCTCACAAAAC TGTAAC TGACGCTGAGG  
CACGAAAGCGTGGGTATCAAACAGGATTAGAAACCCTTGTAGTCC

>Otu17234

CCAGCCTATGGGGTGCTGCAGTGGGGAATATTGCACAATGGGCGAAAGCCTGATGCAGCG  
ACGCCGCGTGGAGGATGAAGGCTTAGGATTGTAAACTCCTGTTAAGTGGGAAGAAAAGC  
TTGCGAGTAATATGCGCAAGTGTTGACGGTACCACTAGAGAAAGCTCCGGCTAACTTCGT  
GCCAGCAGCCGCGGTAATACGAAGGGAGCTAGCGTTATTCGGAATCACTGGGCGTAAAGA  
GCGTGTAGGTGGTTAATTAAGTCAGTTGTTAAATGCCTCGGCTTAACTGAGGACATGCGA  
TTGATACTGGTTGACTAGAGTG CAGGAGAGAGAAGTGGAATTATCGGAGTAGCGGTAAAA  
TGCGTAGATCTCGATAGGAACACCGATGGCGAAGGCAGCTTCTTGGTCTGTTACTGACAC

TAAAGCGCGAAAAGCGTGGGGAGCAAACAGGATTAGAAAACCCGAGTAGTCC

>Otu17235

CCAGCCTACGGGGTGCTGCAGTGGGGAATCTTGCACAATGGGGGCAACCCTGATGCAGCG  
ACGCCGCGTGAACGATGAAGCCCTTCGGGGTGTAAGTTCTTTTCAGCAGGGACGATAATG  
ACGGTACCTGAAGAAGAAGCTGCGGCTAACTACGTGCCAGCAACCGCGTAATACGTAGG  
CAGCGAGCGTTGTTTCGGAATTACTGGGCGTAAAGAGTGTGTAGGCGGTGCTCTAAGTTTCG  
GTGTGAAATCTCCTGGCTTAACTGGGAGGGTGCGCCGAAACTGGAGTGCTCGAGTGTGG  
GAGAGGAAAGCGGAATTCCTGGTGTAGCGGTGAAATGCGTAGAAATGTGGAGGAACACCG  
ATGGCGAAGGCAGCCTCCTGGGCCAATACTGACGCTCATGCACGAAAGCGTGGGGAGCAA  
ACAGGATTAGATACCCTTGTAAGTCC

>Otu17240

CCAGCCTATGGGGTGCTGCAGTCGAGAATCATTCGCAATGGGCGAAAGCCTGACGATGCG  
ACGCCGTGTGGGCGATGAAGGCCTTAGGGTCGTAAAGCTCTTTTCGCCCCGTGAACAAGAGA  
AGCCGGCTAACATCCGGCCGATTTGAGTGTAGCGGGTAAAGAAGCACCAGCTAACTCCGT  
GCCAGCAGCTGCGGTAATACGGAGGGTGCAAGCATTAATCGGATTTATTGGGCGTAAAGG  
GCGCGTAGGCGGGCTGTTAAGTCAGATGTGAAATCCCGGGGCTCAACCTCGGAACAGCAT  
TTGAAACTGGCGGTCTTGAGGGTAGGCGGAGAAAACGGAATTCACAAGTAGCGGTGAAT  
TGCGTAGATATGTGGAAGAACACCGGTGGCGAAGGCGGTTTTCTAGCTTACTCCTGACGC  
TGAGGCGCGAAAGCAAGGGGATCAAACAGGATTAGAAAACCCGTGTAGTCC

>Otu17241

CCAGCCTACGGGTTGCTCCAGCCGAGGATATTCGACAATGGGCGAAAGCCTGATCGAGCG  
ATACCGCGTGATCGATGAAGTGCTTCGGCACGTAAAGATCTTTTATGAGGGAGGAAGTTA  
TTGACGTTACCTCATGAATAAGGGGCTCCTAACTCTGTGCCAGCAGGAGCGGTAATACAG  
AGGCCCCGAGCATTACCCGGAATCATTGGGCGTAAAGAGTGCGTAGGTGGTCGTGTAGT  
CGCCTGTTAAACCCCCGGCTCAACCGGGGAGCTGCGGGCGAAACGGCACGACTGGAGGG  
TGTGAGAGGTGCATGGAACCATGGTGTAGGGGTGAAATCCGTTGATATCATGGGGAAACA  
CCGAAAGCGAAGGCAGTGCACCTGGCGCATTCCTGACACTCAAGCACGAAAGCGTGGGTAG  
CGAACGGGATTAGAAAACCCCGTGTCC

>Otu17253

CCAGCCTACGGGTCGCTGCAGTCGAGAATTTTTTCACAATGGTCGCAAGACTGATGGAGCG  
ACGCCGCGTGAGAGGATGAAGTTTTTCGATTGTAAACTCCTGTCACTGCAGAACAAGGGT  
ATCACGGTCAACAACCTGTGGTATTTGATGGTATGCGGAGAGGAAGGGACGGCTAACTCTG  
TGCCAGCAGCCGCGGTAATACAGAGGTCCCGAGCGTTGTTTCGATTTCATTGGGCGTAAAG  
GGTGTGTAGGAGGTGCGGTTAGTCAGGTGTGAAATCTCGGAGCTTAACTCTGAAACTGCG  
CTTGATACTGCTCGGCTAGAGGATCGGAGGGGGTATCGGAATTTATGGTGTAGCAGTGAA  
ATGCGTAGATATCATAAGGAACACCGGTGGCGAAGGCGGATACCTGGAAGATTCCTGACT  
CTGAAACACGAAAGCCAGGGGAGCAAACGGGATTAGAAAACCCAGTAGTCC

>Otu17255

CCAGCCTACGGGAGGCTGCAGTGGAGAATATTGGTCAATAAACGAAAGTTTGAAC TAGCG  
TTTTGCGGAGATGAGAGGTTCAAAGAACCGTGAAGGCTATGAAAGCTGTAAAGTCTGTGC  
GTGGGTTAGAAAAATGATTCTACACCTGAAGAGAACCCCGGGCCAACAACGTGCCAGCAG  
CTGCGGTAAGGCGTTGACGGGGAAGCGTTACTGGCCGTTACTAGGTGTAAAGAGTGGCTA  
GACTGTTTTAAGAAATTGCACCTAAAATCGTAGAGATGGCGGAGGTTGTTGCAATACCTTA  
ATACTAGAGATTTGGAGAGGTAGGCGATAAGTATAACCTAGAGATAAAAATCTGATAGAT  
TATAAGGATATCCTGTAGCCGCGGCGGCTTTCCATTTCATAATCTGACGTCGAATCACTAA  
AGTACGAGCATCAATCAGGATTAGATACCCGTGTAGTCC

>Otu17258

CCAGCCTACGGGGGGCTGCAGTAGGGAATTGTTTCGCAATGGGCGCAAGCCTGACGACGCA  
ACGCCGCGTGAGAGGATGAAGATTTTCGGATCGTAAACTCCTTTTCGATTGGGACGAATTTT  
CCGAGGGTTAATAGCTCATGGAAGTGACGGTACCGAGAGAAGAAGCCCCGGCTAACTCCG  
TGCCAGCAGCCGCGGTAATACGGGGGGGCAAGCGTTGTTTCGGAATTACTGGGCGTAAAGG  
GCTCGTAGACGGCCAAC TAAGTCAGACGTGAAATCCCTCGGCTTAACCGGGGAACTGCGT  
CTGATACTGGATGGCTCGAGTTCGGGAGAGGGATGCGGAATTCAGGTGTAGCGGTGAAA  
TGCGTAGATATCTGGAGGAACACCGGTGGCGAAGGCGGCATCCTGGACCGACACTGACGC  
TGAGGAGCGAAAAGCCAGGGGAGCAAACGGGATTAGAAAACCCTAGTAGTCC

>Otu17269

CCAGCCTATGGGGGGCTGCAGTGGGGAATCTTGCACAATGGGCGAAAGCCTGATGCAGCA  
ATGCCGCGTGAGTGAAGAAGGCCCTTGGGTTGTAAAGCTCTTTTCGCTTGGAAGAAGGGT

TTTGGAGTTAATACCTCCAGAATTTGACGGTACCAGGATAAGAAGCACCGGCTAAATCCG  
TGCCAGCAGCCGCGGTAATACGGATGGTGCAGCGTTGTTCGGATTGATTGGGCGTAAAG  
CGCACGTAGGCGGGCTCATAAGTCGGATGTGAAAGCCCCGGGCTCAACCTGGGAAGTGA  
TTCGAAACTGTGAGTCTTGAATACCTGAGGGGTTGGTAGAATTCCAGGTGTAGGAGTGAA  
ATCCGTAGATATCTGGAGGAACATCGGAGGCGAAGGCGACCAACTGGCAGTGTATTGACG  
TTGAGGTGCGAAAGCGTGGGGAGCAAACAGGATTAGATACCCTTGTAGTCC

>Otu17271

CCAGCCTACGGGGTGCAGCAGTGGGGAATATTGCACAATGGGCGGAAGCCTGATGCAGCC  
ATGCCGCGTGTGTGAAGAAGGCCTTCGGGTGTAAAGCACTTTAGCTAAAGGTGAGGGCT  
GCGTGTATTAATACCACACGTAGTTGACAGACTTTAGAAAATAAGCACCGGCTAACTCCG  
TGCCAGCAGCCGCGGTAACACGGGGGGTGCAGCGTTAATCGGAATGACTGGGCGTAAAG  
GGCGTGTAGGTGGTTAGCTAAGCGTTTCGTGAAAGAACAGGGCTTACCCTTGTTAAGCGG  
GACGAACTGGTTAGCTAGAGTGGCTGAGAGGGAAGTAGAATTCCAGGGGTAGCGGTGAAA  
TGCGTAGAGATCGGAAGGAACACCGGTGGCGAAGGCGGCTGCCTGGCCTGATACTGACAC  
TGAGGCACGAAAGCGTGGGGAGCAAACAGGATTAGATACCCGAGTAGTCC

>Otu17272

CCAGCCTATGGGTCACTCCAGTGGGGAATCTTGCACAATGGAGGAAACTCTGATGCAGCG  
ACGCCGCGTGAGCGATGAAGCCCTTCGGGTGTAAAGCTCTTTCGACGGGAACGATAATG  
ACGGTACCCGTAGAAGAAGCCCCGGCTAACTTCGTGCCAGCAGCCGCGGTAATACGAAGG  
GGGCTAGCGTTGCTCGGAATCACTGGGCGTAAAGCGCACGTAGGCGGCTTTTTAAGTCAG  
AGGTGAAATCCTGGAGCTCAACTCCAGAACTGCCTTTGATACTGAGAGGCTTGAGTCCGG  
CAGAGGTGAGTGGAAGTGCAGGTGTAGAGGTGAAATTCGTAGGTATTTCGAAGAACACCA  
GTGGCGAAGGCGGCTCACTGGCCCGGTACTGACGCTGAGGTGCGAAAGCGTGGGGAGCAA  
ACAGGATTAGAGACCCTTGTAAGTCC

>Otu17273

CCAGCCTATGGGTCGCTGCAGTAACGAATCTTCCGCAATGCACGAAAGTGTGACGGAGCG  
ACGCCGCGTGGGGGACGAAGTTCTTCGGAATGTAAACTCCTGTCAGGGGTTAGAAAAGTTC  
TGATCAACCCAGAGGAAGGCACGGCTAACTCTGTGCCAGCAGCCGCGGTAAGACAGAGG  
TGCCAAGCGTTAGGCGGAATCACTGGGCTTAAAGCGTGTGTAGGCGGATTCTTAAGTACC  
TTGTGAAATCCCACGGCTTAACCGTGGAAGTGTGAGGTATACTGGGTTTCTTGAGCCGAC  
TAGGGGCAGCCGGAACAAATGGTGGAGCGGTGAAATGCGTAGATATCATTTGGAACGCCA  
ACGGTGAAGACAGGCTGCTGGGGTCGCGCTGACGCTGAGACACGAAAGCCAGGGGAGCAA  
ACGGGATTAGAAACCCTCGTAGTCC

>Otu17275

CCAGCCTATGGGTCGCTGCAGTTTTCGAATCATTCACAATGGGCGAAAGCCTGATGGAGCA  
ACGCCGCGTGAGGGATGAAGGTCTTCGGATTGTAAACCTCTTTGGAGTGGGAAGAACGAC  
CTCCGTGTTAACAGCGCGGAGGAGTGACGGTACCACTAGAACAAAGACGCGGCTAACTCTG  
TGCCAGCAGCCGCGGTAATACAGAGGTGTCAAACGTTGTCCGGAATTACTGGGCGTAAAG  
GGCGCGTAGGCGGCCATATAAGTCAGATGTGAAAGCTCTGGGCTCAACCCAGGAATTGCA  
TCTGATACTGTAAGGCTTGAGTTCGGTAGAGGAGGGCGGAATTCCAGGTGTAGCGGTGAA  
ATGCGTAGATATCTGGAGGAACACCCGTGGCGAAGGCGGCTCTCTGGTCCGAAACTGACG  
CTGAGGTGCGAAAGCTAGGGTAGCAAACAGGATTAGAGACCCAGTAGTCC

>Otu17277

CCAGCCTATGGGGGGCTGCAGCCAGGAATATTGCGCAATGGACGAAAGTCTGACGCAGCG  
ACGCCGCGTGAGGAAGACGGCCTTCGGGTGTAAACTCCTTTTGCCAAGCCGTTACAG  
CTTGCGGAATAAGCCTCTACTAACTACGTGCCAGAAGTCTCGGTAATACGTAGGAGGCTA  
GCGTTATCCGGATTCAATTGGGCGTAAAGTGTGCGTAGGCGTTCCATAAAGTCTTCACTTA  
AAGACTAAGGCTTAACCTTGGAATGGTGGGGATACTCATGGAATTGAGGATTGACAGGG  
AAGCTGGAACAGTTAGTGTAGCAGCGAAATGCGTTGATATTAAGTGAACACCAAGGGCG  
AAGGCAGGCTTCTGGGTTTTTTCCTGACGCTGAGGCACGAAAGCTAGGGTAGCGAAACAGA  
TTAGAAACCCAGTAGTCC

>Otu17282

CCAGCCTATGGGGTGCAGCAGTGGGGAATATTGCGCAATGGGCGAAAGCCTGACACAGCG  
ACGCCGCGTGAGGATGAAGGCCTACGGGTGTAAACTTCTGTAAAGCGGGAAGAAAATC  
CTATCTCTAATACAGATGGGCATGACGGTACCGCTAGAGAAAGCACTGGCTAAACTCGTG  
CCAGCAGCCGCGGTAATACGAGTGGTGCAGCATTATTTCGGAATCATTGGGCGTAAAGGG  
TGCGTAGGTGGCACATTAAAGTCTACTGTTAAATCTCTCGGCCTAACCGGGAAATCGCAGT  
GGAGACTGGTGAGCTAGAGGATGGGAGAGAGAAGTGGAATTCTCGGAGTAGCGGTAAAT

CGGTAGATCTCGAGAGGAACACCGATGGCGAAAGCAGCTTCTTGACCAATCCTGACACTG  
ATGTACGAAAGCGTGGGGAGCAAACAGGATTAGATACCCGCGTAGTCC  
>Otu17289  
CCAGCCTACGGGGTGCAGCAGTGGGGAATCTTGACAATGGGCGAAAGCCTGATGCAGCA  
ACGCCGCGTGAGGGACGAAGGCTTTCTGAGTTGTAAACCCCTTTCAGTAGGGACGAAATC  
AGACGGTACCTACAGAAGAAGCCCCGGCCAACCTACGTGCCAGCAGCCGCGGTAACACGTA  
GGGGGCAAGCGTTGTCCGGATTTATTGGGCGTAAAGAGCTCGTAGGCGGTTTCGGTAAGTT  
GGGTGTGAAACCTCCAGGCTCAACCTGGAGACGCCACCCGATACTGCTGTGACTAGAGTC  
CGGTAGGGGAGCGTGGAATTCCTGGTGTAGCGGTGAAATGCGCAGATATCAGGAGGAACA  
CCAGCGGCGAAGGCGGCGCTCTGGGCCGGAACCTGACGCTGAGGAGCGAAAGCGTGGGTAG  
CAAACAGGATTAGAGACCCGCGTAGTCC  
>Otu17294  
CCAGCTGGGATGCAGCAGTGGGGAATCTTGCGCAATGGGCGAAAGCCTGACGCAGCAACG  
CCGCGTGAGGGACGAAGGCCTTCGGGTTGTAAACCTCTTTCAGCAGGGACGATTGTGACG  
GTACCTGCAGAAGAAGCCCCGGCCAACCTACGCGCCAGCAGCCGCGGTAATACGTAGGGGG  
CGAGCGTTGTCCGGATTCAATTGGGCGTAAAGAGCTCGTAGGCGGCTTGGTAAAGTCGGGTG  
TGAAACCTCCAGGCTCAACCTGGAGACGTCACCTCGATACTGCCATGGCTAGAGTCCGGTA  
GGGGCCACGGAATTCCTGGTGTAGCGGTGAAATGCGCAGATATCAGGAGGAACACCGGT  
GGCGAAGGCGGTGGGCTGGGCCGGAACCTGACGCTGAGGAGCGAAAGCGTGGGGAGCGAAC  
AGGATTAGAAACCCGCGTAGTCC  
>Otu17295  
CCAGCCTACGGGGTGCAGCAGTCAAGAACCTTCCGCAATGGGCGAAAGCCTGACACAGCG  
ACACCGCGTGAGCGAAGAAGCCCTTTGGGGTGTAAGCTCTGTGACGAGGAACGAAATCA  
ATGACGGTACCTGCAGAGGAAGCATCGGCTAACTACGTGCCGGCAGCCGCGGTAAGACGT  
AGGATGCGAGCGTTGTCCGGATTTATTGGGCGTAAAGAGTTCGTAGGCGGTTTCGTTAAGT  
CTGATGTTAAAGATCGGGGCTCAACCCTGGGAGTGCATTGGATACTGGCGGACTGGAGTA  
CGGTAGAGGCAAGTGGAATTCACAGTGTAGCGGTGAAATGCGTAGATATTGGGAAGAACA  
CCGGTGGCGTAGGCGACTTGCTGGGCCGTTACTGACGCTGAGGAACGAAAGCCAGGGGAG  
CGAATGGGATTAGAAACCCAGTAGTCC  
>Otu17299  
CCAGCCTACGGGGCGCAGCAGTGGGGAATATTAGACAATGGGGGCAACCCTGATCCAGCA  
ATACCGCGTGGGTGGAAGAAGGCCTTCGGATTGTAAAGCCCTTTCGGCGGGGACGATGATG  
ACGGTACCCGCGAGAAGAAGCCCCGGCTAACTTCGTGCCAGCAGCCGCGGTAATACGAAGG  
GGGCTAGCGTTGCTCGGAATGACTGGGCGTAAAGGGCGCGTAGGCGGTTTGGACAGTCGG  
GTGTGAAATTCCTGGGCTTAACCTGGGGGCTGCGCTCGATACATCTGGACTTGAGTGAGG  
AAGAGGGTCGTGGAATTCACAGTGTAGAGGTGAAATTCGTAGATATTGGGAAGAACACCG  
GTGGCGAAGGCGGCGACCTGGTCCTTGACTGACGCTGAGGCGCGAAAGCGTGGGGAGCAA  
ACAGGATTAGAAACCCAGTAGTCC  
>Otu17308  
CCAGCCTATGGGATGCAGCAGCTAGGAATATTGCGCAATGGGCGAAAGCCTGACGCAGCA  
ACGCCGCGTGCGGGATGAAGGCCTTCGGGTTGTAAACCGCTTTTAGCAGGAACGATTATG  
ACGGTACCTGCAGAAAAAGCACCGGCTAACTATGTGCCAGCAGCCGCGGTAATACATAGG  
GTGCAAGCGTTGTCCGGATTTATTGGGCGTAAAGAGTTCGTAGGCGGCACAGTAAGTCAG  
AAGTTAAAACGCAGGGCTCAACCCTGCGTCGCTTTTGATACTGCTGAGCTTGAGTATGGC  
AGGGGAAGACGGAATTCACGGGTAGCGGTGAAATGCGCAGATATGTGGAGGAACACCAA  
CGGCGAAGGCAGTCTTCTGGGCCAAAACCTGACGCTGAGGAACGAAAGCGTGGGGAGCGAA  
CAGGATTAGAGACCCCGGTAGTCC  
>Otu17317  
CCAGCCTATGGGACGCAGCAGTAGGGAATTTCCACAATGGTCGCAAGACTGATGGAGCG  
ACGCCGCGTGAGAGGATGAAGGTTTTCGGATTGTAAACTCCTGTCACTGCAGAACAAGGTT  
ATGCGATTGAACATTTCTGTGAATTGATGGTATGCGGAGAGGAAGGGACGGCTAACTCTG  
TGCCAGCAGCCGCGGTAAGACAGAGGTCCCGAGCGTTGTTCCGATTCAATTGGGCGTAAAG  
GGTGTGTAGGAGGTTGGGTAAGTCAGGTGTGAAATCTCGGAGCTTAACTCTGAAACTGCG  
CTTGATACTGCCCGGCTAGAGGATCGGAGGGGGTAACGGAATTCATGGTGTAGCAGTGAA  
ATGCGTAGATATCATGAGGAACACCGGTGGCGAAGGCGGTTACCTGGAAGATTCCTGACT  
CTGAAACACGAAAGCCAGGGGAGCAAACGGGATTAGATACCCTCGTAGTCC  
>Otu17322  
CCAGCCTATGGGGGGCTGCAGTGGGGAATATTGGACAATGGGCGCAAGCCTGATCCAGCC

ATGCCGCGTGAGTGATGAAGGCCCTAGGGTTGTAAAGCTCTTTTGTGCGGGAAGATAATG  
ACGGTACCGCAAGAATAAGCCCCGGCTAACTTCGTGCCAGCAGCCGCGGTAATACGTAGG  
GGGCCAGCGTTGCTCGGAATTACTGGGCGTAAAGGGTTTCGTAGGCGGTGCGGCAAGTTGG  
GAGTGAAATCTCTGGGCTTAACCCAGAGGCTGCTTTCAAACCTGCCGTGCTCGAGTGCGA  
GAGAGGTCAGTGGAATTGCAGGTGTAGCGGTGAAATGCGTAGATATCTGCAGGAACACCC  
GTGGCGAAGGCGGCTGACTGGATCGCAACTGACGCTGAGGAACGAAAGCTAGGGGAGCAA  
ACAGGATTAGAGACCCTTGTAGTCC

>Otu17324

CCAGCCTATGGGGTGCTGCAGTCGAGAATTTTTTCACAATGGACGAAAGTCTGATGAAGCG  
ACGCCGCGTGATACGATGAAGGGCCTAGGTCCGTAAAGTACTTTTATGTTGGAACAAACGAT  
GATTGTACAACATGAATAAGGGGTCGCTAACTCTGTGCCCCGAGCAGCGGTAATACAGAG  
ACCCCGAGCGTTATCCGGAATTATTGGGCGTAAAGGGTGAGTAGGTTGTTTTATTAGTCA  
GTTGTTAAAGGTTTGGGGCTCAACCCAGATATGCAATTGAAACGGTAAACCTAGAAATAT  
GTAAGAGGTTAGTGGAACCTCTATGTGTAGGGGTAAAATCCGTTGATATATAGGGGAACAC  
CTAAAGCGAAGGCAGCTAACTGGTACATTATTGACACTGAATCACGAAAGCGTGGGTAGC  
GAATGAGATTAGAAACCCCGTAGTCC

>Otu17333

CCAGCCTATGGGAGGCAGCAGTGGGGAATATTGGACAATGGGGGCAACCCTGATCCAGCG  
ATGCCGCGTGAGTGAAGAAGGCCTTCGGGTCGTAAAGCTCTTTAGGTTGGGAAGAAGGAT  
ATTCGGTGATAGCCGAGTATTTTGACGGTACTGACAGAATAAGCACCGGCAAACTCTGT  
GCCAGCAGCCGCGGTAATACAGAGGGTGCGAGCGTTAATCGGAGTTACTGGGCGTAAAGG  
GCGCGTAGGCGGTGATATGAGTGTGGTGTGAAAGCCCCGGGCTTAACCTGGGAAGCGCAT  
CGCAAACGATATGACTAGAGTAGATGAGAGGGTGGCGGAATTTCCGGTGATAGCGGTGAAA  
TGCGTAGAGATCGGAAGGAACGTCAATGGCGAAGGCAGCCACCTGGCATCATACTGACGC  
TGAGGCGCGAAAGCGTGAGGAGCGAACAGGATTAGATACCCCGTAGTCC

>Otu17341

CCAGCCTACGGGTTGCTCCAGTCGAGAATTTTTCTCAATGGGCGAAAGCCTGAAGGAGCG  
ACGCCGCGTGGGGGATGAATGGCTTCGGCCCGTAAACCCCTGTCATTTGCGAACAAATTTG  
ACTCACTTAACACGTGTGTCAATTGATTGTAGTAGAAGAGGAAGGGACGGCTAACTCTGTG  
CCAGCAGCCGCGGTAATACAGAGGTCCCAAGCGTTGTTTCGGATTCACTGGGCGTAAAGGG  
TGCGTAGGCGGTCTGGGTAAGTCTGGCGTGAAATCCCGGAGCTCAACTCCGGAACCTGCCTT  
TGATACTGGAGATCTTGAGTCCGGGAGAGGTGAGTGGAACCTCCGAGTGATAGAGGTGAAAT  
TCGTAGATATTCGGAAGAACACCAGTGGCGAAGGCGGCTCACTGGCCCCGCTACTGACGCT  
GAGGTGCGAAAGCGTGGGGAGCAAACAGGATTAGAGACCCCGTAGTCC

>Otu17345

CCAGCCTATGGGATGCTGCAGTAACGAATCTTCCGCAATGTACGCAAGTATGACGGAGCG  
ACGCCGCGTGATAGGACGAAGTCCCTCGGGATGTAAACTACTGTCAGGGGTTACCAAGTTC  
TGAGGAACCCAGAGGAAGGCACGGCTAACTCTGTGCCAGCAGCCGCGGTAAGACAGAGG  
TGCCGAGCGTTAGGCGGAATCACTGGGCTTAAAGCGTGTGTAGGCGGATTCGTAAGTACT  
TTGTGAAATCCCACGGCTCAACCGTGGAACCTGCTTGGTATACTGCGAATCTTGAGCTAAC  
TAGGGGCAACCGGAACAAATGGTGGAGCGGTGAAATGCGTAGATATCATTTGGAACGCCA  
ATGGTGAAAACAGGTTGCTGGGGTTATGCTGACGCTGAGACACGAAAGCCAGGGGAGCAA  
ACGGGATTAGAGACCCCGTAGTCC

>Otu17357

CCAGCCTACGGGGGGCTGCAGTGGGGAATATTGGGCAATGGGTGGAAACCTGACCCAGTA  
ATAATCCAAGAGTGAACAATAGACAGCAACAACGCTGTAAACTCTTTTAACAAGAAAGA  
TAATGACGGTACTTGAAGAATAAGTACTGGCTAATTCTGTGCCAGCAGCCGCGGTAATAC  
AGGAAGTACAGACGTTATTCAAATGGATTGGGTGTAAAGGATATGTAGGTGGTTTTGAGT  
GGATATTTCTTTTAAATCCAATAATAAATCTTATTGGACTAGAAATATAACCAGAACTA  
AGAGTTTAGGTTGAGTTATAAGAATTTTTTATGTAAGGGTTGAATCTATAAAAATTAAAA  
CGACTACCAAAATTTGTAGCGAAAGCATATTTCTAGCCTAATACTGACACTGAGATATGAA  
AGTCTAGGTATCAAACAGGATTAGAAACCCCGTAGTCC

>Otu17358

CCAGCCTACGGGAGGCTGCAGTAGGGAATATTGCGCAATGGAGGAACTCTGACGCAGCG  
ACGCCGCGTGGGTGATGAAGGCCTTCGGGTCGTAAAGCCCTGTCGGAAGGGACGAAAAAC  
GATATGGTTAATATCCATGTGCTTGACGGTACCTTTAGAGGAAGCACCGGCTAACTACG  
TGCCAGCAGCCGCGGTAATACGTAGGGTGCTAGCGTTGTTTCGGAATCATTGGGCGTAAAG  
CGCGTGACGGTGGTTAGGTAAGTCAGGTGTGAAATCCCTGGGCTCAACCGAGGAAGTGCA

CTTGAAACTGCCTGGCTAGAGGACGGTAGAGGAAGGTGGAATTCCTAGTGTAGAGGTGAA  
ATTCGTAGATATTAGGAGGAATACCGGTGGCGAAGGCGGCCTTCTGGGCCGATCCTGACA  
CTGAGACGCGAAAGCGTGGGGAGCGAACAGGATTAGAGACCCTAGTAGTCC

>Otu17369

CCAGCCTATGGGTTGCTCCAGTAAGGAATATTGGTCAATGGACGCAAGTCTGAACCAGCC  
ATGCCGCGTGAAGGATGAAGGCCCTCTGGGTTGTAACTTCTTTTATCTGGGACGAAAAA  
CAGGAATTCTTTTCTGCTCGACGGTACCAGAGGAATAAGCACCGGCTAACTCCGTGCCAG  
CAGCCGCGGTAATACGGAGGGTGCAAGCGTTATCCGGATTTACTGGGTTTAAAGGGTGCG  
TAGGTGGGCAGGTAAGTCAGTGGTGAAATCTCCGGGCTTAACCCGGAACCTGCCATTGAT  
ACTATCTGTCTTGAATATCCTGGAGGTAAGCGGAATATGTCATGTAGCGGTGAAATGCTT  
AGAGATGACATAGAACACCAATTGCGAAGGCAGCAGGCTACGCATATATTGACGCTGAGG  
CACGAAAGCGTGGGGATCAAAACAGGATTAGATACCCTAGTAGTCC

>Otu17380

CCAGCCTACGGGTGGCTGCAGTGGGGAATTGTTTCGCAATGGGCGCAAGCCTGACGACGCA  
ACGCCGCGTGGAGGATGAAGACCTTCGGGTCGTAAACTCCTTTTCGATCGAGACGAATGGC  
CTTTGGGTTAATAGCCTGGAGGAATGACGGTACCGAGAGAAGAAGCCCCGGCTAACTCCG  
TGCCAGCAGCCGCGGTAATACGGGGGGGGCAAGCGTTGTTTCGGAATTACTGGGCGTAAAG  
GGCTCGTAGGTGGCCAACTAAGTCAGACGTGAAATCCCTCGGCTTAACCGGGGAACTGCG  
TCTGATACTGGATGGCTTGAGTCCGGGAGAGGGATGCGGAATTCCAGGTGTAGCGGTGAA  
ATGCGTAGATATCTGGAGGAACACCGGTGGCGAAGGCGGCATCCTGGACCGGCACTGACA  
CTGAGGAGCGAAAGCCAGGGGAGCGAACGGGGTTAGATACCCTGGTAGTCC

>Otu17393

CCAGCCTACGGGATGCTGCAGTCAGGAATATTGCGCAATGGAGGAACTCTGACGCAGCG  
ACGCCGCGTGGGTGATGAAGGCCTTCGGGTCGTAAAGCCCTGTTCGGAGGGGAAGAAAAGC  
TCGCTGGCTAATATCCAGCGGGCCTTTGACGGTACCCTCAAAGGAAGCACCGGCTAACTC  
CGTGCCAGCAGCCGCGGTAAGACGGAGGGTGCAAGCGTTGTTTCGGATTGACTGGGCGTAA  
AGGGCGTGTAGGCGGTTGCCCAAGTCCGATGTGAAAGCCCGGGGCTTAGCCTCGGAAAGTG  
CATCGGAAACTAGGCAGCTGGAGCGCGATAGAGGAGGGTAGAATTCCTGGTGTAGCGGTA  
AAATGCGTAGATATCAGGAGGAACACCGGTGGTGTAAACGGCTTTCTGGACCGTAACTGA  
CGCTGAGGCACGAAAGCGTGGGTAGCAAACAGGATTAGAAACCCAGTAGTC

>Otu17399

CCAGCCTACGGGAGGCACCAGTCGAGAATCTTCTGCAATGGGCGAAAGCCTGACAGAGCG  
ACGCTGTGTGAGCGATGAAGGCCTTTGGGTTGTAAAGCTCTTTTCGGTTAGGAACAAGAAA  
AGCGGACGAATACTCCGCTGATTTGAGCGTACTAGCTAAAGAAGCACCGGCTAATTCCGT  
GCCAGCAGCTGCGGTAATACGGAAGGTGCAAGCATTAAATCGGATTTATTGGGCGTAAAGG  
GCGCGTAGGCGGAATCGTAAGTCAGATGTGAAATTCTGGTACTCAATACCAGAACTGCAT  
CTGAAACTGCGAATCTAGAGGGTAGATGGAGAAAACGGAATTCCACGTGTAGCGGTGAAA  
TGCGTAGATATGTGGAAGAACACCTGTGGCGTAAGCGGTTTTCTAATTTACTTCTGACGC  
TGAGGCGCGAGAGCAAGGGGAGCAAACAGGATTAGAAACCCCTGTAGTCC

>Otu17407

CCCAGCCTACGGGTGGCTGCAGTCGAGAATATTTGACAATGGAGGAAACTCTGATCAAGC  
GACGCCGCGTGCAGGATGAAGTTCTTCGGGACGTAAACTGCTTTTGGAGACTACTAAGTT  
TTGAAGGGTCTCAGAATAAGAGGTTGCTAAACTCGTGCCAGCAGCAGCGGTAATACGAGT  
GCCTCAAGCGTTATCCGGAATTATTGGGCGTAAAGGGTATGTAGGTGGTTTTGTAGTCC  
TCTGTTAAATTTCTGGGCTTAACCCAGAGCATGCAGGGGAAACGGCAGGACTTTAGAGTA  
TGCGAGGGGTCTGTGGAATTCTACGTGTAGCAGTGAAATGCGTTGATATGTAGGAGAAC  
CCAAAAGCGAAGGCAGCAGACTGGAGCATTACTGACACTGAAATACGAAAGCGTGGGTAG  
CGAATGGGATTAGATACCCAGTAGTCC

>Otu17414

CCAGCCTATGGGTTGCAGCAGTGGGGAATTTTTCGCAATGGGGGAAACCCCTGACGCAGCA  
ACGCCGCGTGGACGATGAAGCTTCTTGGAGTGTAAGTCCCTTTTCGGCAGGGACGAAACTG  
GGCAACCAGCTGACGGTACCTGAAGAAGAAGCCCCGGCTAACTCCGTGCCAGCAGCCGCG  
GTAATACGGGGGGGGGCGAGCGTTGTTTCGGAATTATTGGGCGTAAAGGGTGCGTAGGCGG  
TGCGGTAAGATTGGTGTGAAAACCTCTGGGCTTAACCCAGAGCTGGCATCAATGACTGCCG  
TGCTAGAGTGTGGGAGAGGAGAGTGGAATTCCTGGTGTAGCGGTGAAATGCGTAGATATC  
GGGAGGAACATCGGTGGCGAAGGCGGCTCTCTGGACCACAACTGACGCTGAGGCACGAAA  
GCTAGGGGAGCAAACAGGATTAGATACCCGAGTAGTCC

>Otu17419

CCAGCCTATGGGTGGCAGCAGTTTCGAATCATACACAATGGGCGAAAGCCTGGTGGTGC  
ACGCCGCGTGAGGGATGAAGGCTTTCGGATTGTAAACCTCTGTCACCGGGGAAGAAACGC  
TTTGCGTTAATACTGCAAAGCCTGACTTAACCCGGAGAGGAAGCAGTGGCTAACTCTGTG  
CCAGCAGCCGCGGTAATACAGAGACTGCGAGCGTTATTTCGGATTCACTGGGCGTAAAGGG  
TGCGCAGGCGGCCAAGTGTGTTAGGCGTGAAAGCCCGGGGCTTAACCCCGGAATTGCACC  
TAAACTACATGGCTAGAGCATTTGGAGAGGGTAGCAGAATTCACGGTGTAGCAGTGAAAT  
GCGTAGATATCGTGAGGAATACCAGAGGCGAAGGCGGCTACCTGGACCAGCACTGACACT  
GAAGCACGAAAGCGTGGGGAGCAAACAGGATTAGAGACCCTCGTAGTCC

>Otu17437

CCAGCCTACGGGAGGCACCAGCTAGGAATATTCCGCAATGGACGAAAGTCTGACGGAGCG  
ACGCCGCGTGAGCGATGAAGGCCTTCGGGTGTAAAGTCCTTTCGTGCGGGAAGATTTTT  
TACGGTATGAATAATGCCGTAGATCGACTGTACCGCAGGAAGAAGCCCCGGCTAATTACG  
TGCCAGCAGCCGCGGTAATACGTATGGGGCGAGCGTTATTTCGGATTCAATTGGGCGTAAAG  
CGTATGTCGGGGGTCTGATAAGTCGGAGGTGAAATTTTCCTGCTCAACATGAAAATTGCT  
TCCGATACTGACAGACTAGAGTTTTGGAGAGGAGATTGGAATTCAGGTGTAGGGGTGAA  
ATCTGTAGATATCTGGAAGAACACCAGTGGCGAAGGCGAATCTCTGGCCAAAACTGACC  
CTTAGATACGAAAGCCAGGGGAGCAAACGGGATTAGAAACCCAGTAGTCC

>Otu17473

CCAGCCTATGGGTGCTCCAGTGGAAGTCTGAGACAAGGTCCACACTCTTGAAGAGGCAGCA  
GTGAGGAATCATGGGCAATGCGCGCAAGCGTGACCCTGCCAGCAGCCAACTGTGACGACG  
GAGTCTTCTGTAAAGCAGCGTCGAGGAGGCCAACCCCGATGGCCTCCTCGGGCAGTCGT  
GATGAATCCTTGTGCCAGCAGTCGCGGTACACAAGAACGGCGAATGTTGCTCGTTTTGAA  
TTGGGTCTAAACGTGCGTAGGTGGGATGGTTGGAGGAGGCTTGCAGTCAGCGCGCGATC  
CGCGCGAACGGGCCTCTGGCCCCATCCTGGAGGCGCTCAGAGGAGAGTGGAATGCTCAGA  
GGACCGATGAAATGGGAGGATCCTGAGTGGAACCTCAACGGCGAAGGCAACTCTCTGGGG  
GCGCCTGACACTGAGAGCACGACGGCGTGGGGAGCAAACGGGATTAGAAACCCCGTAGT  
CC

>Otu17489

CCAGCCTACGGGGGGCAGCAGTCGAGAATCTTCGGCAATGCACGAAAGTGTGACCGAGCG  
ACGCCGCGTGATTGATGAAGCCCTTCGGGGTGTAAAGATCTTTTATGCGTGAAGAAATTA  
TTGACATCAGCGCATGAATAAGGGGCTCCTAACTCTGTGCCAGCGGGAGCGGTAATACAG  
AGGCCCCGAGCGTTATCCGGAATTATTGGGCGTAAAGGGTGCGTAGGTGTTTTGGTTAGT  
CGAATGTTAAAGATCTGGGCTTAACCCAGGGAAGGCATTCGAAACGGCCAGACTTGAGTA  
TGTGAGAGGTGAACGGAACCTCATGGAGTAGGGGTGAAATCCGTTGATATCATGGGGAACA  
CCAAATGCGAAGGCAGTTCACTGGCACATTACTGACACTCAAGCACGAAAGCGTGGGTAG  
CGAATGGGATTAGAAACCCGTGTAGTCC

>Otu17499

CCAGCCTATGGGAGGCTGCAGCGGGGAATCTTGCAATGGGGGAAACCCTGATGCAGCG  
ACGCCGCGTGAGCGATGAAGTCCTTCGGGGCGTAAAGCTCTTTCGACAGGGAAGATAATG  
ACTGTACCTGTAGAAGCAGCTGCGGCTAACTACGTGCCAGCAGCCGCGGTAATACGTAGG  
CAGCGAGCGTTGTTTCGGAGTTACTGGGCGTAAAGGGTGTGTAGGCGGTTGCTTAAGTTTG  
GTGTGAAATCTCCCGGCTCAACTGGGAGGGTGCGCCGAATACTGAGTGACTAGAGTGC GG  
GAGAGGAGAGTGGAATTCCTGGTGTAGCGGTGAAATGCGTAGATATCAGGAGGAACACCG  
GCGGTGTAGACGGCTCTCTGGACCCTAACTGACGCTGAGACACGAAAGCGTGGGTAGCAA  
ACAGGATTAGATACCCAGTAGTCC

>Otu17502

CCAGCCTATGGGGGGCTGCAGTCGAGGATCATTCGCAATGCGCGAAAGCGTGACGATGCG  
ACGCTGCGTGAGAGATGAAGGCCTTCGGGTCGTAAACTCCTGTCAATTTGGGAACAATGGC  
GAGGGGGGTAATATCCCCTTCGCGTGATAGTACCAGAAGAGGAAGCCACGGCTAACTCTG  
TGCCAGCAGCCGCGGTAATACAGAGGTGGCGAGCGTTGTTTCGGATTTACTGGGCGTAAAG  
GGTGCGTAGGTGGTTTTGTGTGTTCGGATGTGAAAGCTCACTGCTCAACGGTGAAATTGCA  
TTCGAAACTGCAGGACTGGAGTGCAGGAGAGGAGAGCGGAATACTTGGTGTAGCGGTGGA  
ATGCGTTGATATCAAGTGGAACACCGGTGGCGTAGGCGGCTCTCTGGAATGTTACTGACA  
CTGAGGCACGAAAGTTGGGGGAGCAAACAGGATTAGATACCCCGGTAGTCC

>Otu17536

CCAGCCTACGGGGGGCAGCAGTCGAGAATTTTTCTCAATGGGCGAAAGCCTGAAGGAGCG  
ACGCCGCGTGGGGGATGAATGGCTTCGGCCCGTAAACCCCTGTCATTTGTGAACAAATTA  
ATTCACCAACACGTGGATTATTGATTGTAACGGAAGAGGAAGGGACGGCTAACTCTGTG



CCAGCAGCCGCGGTAATACAGAGGTCCCAAGCGTTGTTTCGGATTCACTGGGCGTAAAGGG  
TGCGTAGGCGGTTGGGTAAGTCTGACGTGAAATCTCCGGGCCTAACCCGAAACTGCGTT  
GGATACTATCCAGCTAGAGGATTGGAAGGGAGACTGGAATACTTGGTGTAGCAGTGAAAT  
GCGTAGATATCAAGTGGAACACCAGTGGCGAAGGCGAGTCTCTGGACAATTCCTGACTCT  
GAGTTGCGGAAGCGTGGGGAGCAAAAAGGATTAGAAACCCCAGTAGTCC

>Otu17543

CCAGGGGCGCAGCAGTGGGGAATTTTGCGCAATGGGGGAAACCCTGACGCAGCAACGCCG  
CGTGGAGGATGAAGTCCTTCGGGACGTAAACTCCTTTTCGATCGGGACGATTATGACGGTA  
CCGGAAGAAGAAGCCCCGGCTAACTTCGTGCCAGCAGCCGCGGTAATACGAGGGGGGCGA  
GCGTTGTTTCGGAATTATTGGGCGTAAAGGGTGCCTAGGCGGCTTGGTAAGTCTTATGTGA  
AATCTATGGGCTCAACTCATAGACTGCATGAGAACTGCCGGGCTCGAGTCCGGGAGAGG  
TGAGTGGAAGTGCAGTGTAGAGGTGAAATTCGTAGATATTCGCAAGAACACCAGTGGCG  
AAGGCGGCTCACTGGCCCGGTACTGACGCTGAGGTGCGAAAGCGTGGGGAGCAAACAGGA  
TTAGAAACCCCTAGTAGTCC

>Otu17559

CCAGCCTATGGGAGGCACCAGTAACGAATATTCACAATGCGCGAAAGCGTGATGGAGCG  
ATACCGCGTGCAGGACGAAGCCCCTCGGGGTGTAAACTGCTGTCAGGGTTTAACAACACA  
ATGAGTAGACCCAGAGGAAGAGCGGCTAACTCTGTGCCAGCAGCCGCGGTAATACAGAG  
GCCTCGAGCGTTAATCGGAGTCACTTGGGCTTAAAGGGTGCCTAGGCGGTTCCGTAAAGT  
TCTTGTGAAATCCCATGGCTCAACCATGGAATTGCTCGGCATACTGCGGAACCTGAGGTC  
GGTAGAGGTGCTGGAAGTCTAGGTGGAGCGGTGAAATGCGTAGATATCTAGAGGAACGC  
CAAAGGTGAAGACAGGCGACTGGGCCGATTCTGACGCTGAGGCACGAAAGCGTGGGTAGC  
GAACGGGATTAGAAACCCCAGTAGTCC

>Otu17569

CCAGCCTACGGGGGGCTCCAGTCGAGAATTTTTCTCAATGGGCGAAAGCCTGAAGGAGCG  
ACGCCGCGTGGGGGATGAATGGCTTCGGCCCGTAAACCCCTGTCATTTGTGAACAAATTG  
TTTCACCTAACACGTGAAGCATTGATAGTAACGGAAGAGGAAGGGACGGCTAACTCTGTG  
CCAGCAGCCGCGGTAATACAGAGGTCCCAAGCGTTGTTTCGGATTCACTGGGCGTAAAGGG  
TGCGTAGGTGGCGGGGTAAGTTTGATGTGAAATCTCCGGGCTTAACCCGAAACTGCATT  
GAATACTATTCTGCTCGAGGATTGGAGGGGGGACTGGAATACTTGGTGTAGCAGTGAAAT  
GCGTAGATATCAAGTGGAACACCAGTGGCGAAGGCGAGTCCCTGGACAACCTCTGACACT  
GAGGCACGAAAGCTAGGGGAGCAAACAGGATTAGAAACCCCTCGTAGTCC

>Otu17574

CCAGCCTACGGGTTGCTCCAGTGGGGAATCTTGACACAATGGGCGAAAGCCTGATGCAGCG  
ACGCCGCGTGGGGGATGAAGCATTTCGGTGTGTAAACCCCTTTTCGACCGGGAAGAATGCC  
TCGCAAGAGGAGTGACGGTACCGGTATAAGAAGCCCCGGCTAACTACGTGCCAGCAGCCG  
CGGTAAGACGTAGGGGGCCAGCGTTGTTTCGGAATTACTGGGTGTAAAGGGTTTCGTAGGCG  
GTGTGGCAAGTTGGGAGTGAAATCTCTGGGCTTAACCCAGAGGCTGCTCCCGAAACTGCC  
ATGCTCGAGTGTGAGAGAGGCGAGTGGAATTGCGGGTGTAGCGGTGAAATGCGTAGATAT  
CCGCAGGAACATCCGAGGCGAAAGCGGCTCGCTGGATCACAACTGACGCTGAGGGACGAA  
AGCTAGGGGAGCAAACAGGATTAGAAACCCCAGTAGTCC

>Otu17578

CCAGCCTATGGGACGCACCAGTGAGGAATATTGGTCAATGGACGCAAGTCTGAACCAGCC  
ATGCCGCGTGAAGGATGAAGGCCTTAGGGTTGTAAAGCTCTTTTCGCCAGGGACGATAATG  
ACGGTACCTGGATAAGAAGCCCCGGCTAACTTCGTGCCAGCAGCCGCGGTAATACGAAGG  
GGGCTAGCGTTGTTTCGGAATTACTGGGCGTAAAGCGTATGCAGGCGGATCGTTAAGTCGG  
GGTGAAATCCCAGGGCTCAACCTCGGAAGTGCCTTCGATACTGTGATCTTGAGTCCGG  
GAGAGGTGAGTGGAAGTGCAGTGTAGAGGTGAAATTCGTAGATATTCGCAAGAACACCA  
GTGGCGAAGGCGGCTCACTGGCCCGGTACTGACGCTGAGATACGAAAGCGTGGGGAGCAA  
ACAGGATTAGATACCCCTTGTAAGTCC

>Otu17583

CCAGCCTACGGGTTGCAGCAGTCGAGAATCATTCGCAATGGGCGCAAGCCTGACGATGCG  
ACGCCGTGTGTGCGATGAAGGCCCTCGGGTTGTAAAGCACTTTTCGCCTGGGAACAAGAGA  
AGTTAGCTAATAACTAGCGGATTTGAGGGTACCAGGTAAAGAAGCACCGGCTAACTCCGT  
GCCAGCAGCTGCGGTAATACGGAGGGTGCAAGCATTAATCGGATTTATTGGGCGTAAAGG  
GCGCGTAGGCGGGTTGGTAAGTCATGTGTGAAAGACCGGAGCTCAACTCCGGAACGCAC  
GTGAGACTGCCAGTCTAGAGGGTAGGCGGGGAAAATGGAATTCACAAGTAGCGGTGAAA  
TGCGTAGATATGTGGAAGAACACCGGTGGCGAAGGCGATTTTCTGGCTTATACCTGACGC

TGAGGCGCGAAAAGCAAGGGGATCAAACAGGATTAGAAAACCCCTGTAGTCC

>Otu17597

CCAGCCTATGGGAGGCAGCAGTGGGGAATCTTGCACAATGGACGAAAGTCTGATGCAGCA  
ACGCCGCGTGGGGGATGAAGCTTTTCGGAGTGTAACCCCTTTTCGACCCGGACGAATGCC  
CGCAAGGGTTTGACGGTACGGGTATAAGAAGCCCCGGCTAACTACGTGCCAGCAGCCGCG  
GTAAAACGTAGGGGGCCAGCGTTGCTCGGAATTACTGGGCGTAAAGGGTCCGTAGGCGGT  
GTGGCAAGTCGGAAGTGAAATCTCTGGGCTTAACCCAGAGGCTGCTCCCGAAACTGCTAT  
GCTAGAGTGTGAGAGAGGCGAGTGGGAATTGCAGGTGTAGCGGTGAAATGCGTAGATATTC  
GCAAGAACACCAGTGGCGAAGGCGGCTCACTGGCCCGGTACTGACGCTGAGATGCGAAAG  
CGTGGGGAGCAAACAGGATTAGAGACCCGTGTAGTCC

>Otu17621

CCAGCCTACGGGTCGCTGCAGTGAGGAATCTTCGGCAATGGGCGCAAGCCTGACCGAGCG  
ACGCCGCGTGCGGGACGAAGCGTTTCGGCGTGTAACCGCTTTTCTGGGGGACGAGACAG  
GACGGTACCCAGGAAGAAGTCTCGGCTAACTACGTGCCAGCAGCCGCGGTAATACGTAG  
GAGACGAGCGTTGTCCGGAATTACTGGGCGTAAAGCGTGTGCAGGCGGCTTCTCGCGTCG  
GCGGTGAAATCTCCCGGCTCAACTGGGAGGGGGCAACCGATACGGAGGGGCTTGAGGGTT  
GGAGAGGAAAGCAGAACTCCCGGTGGAGCAGTGAAATGTGTAGAGATCGGGAAGAATACC  
AGTGGCGAAGGCGGCTTTCTGGCCAATACCTGACGCTCATACAGAGAGCTTGGGGAGCA  
AACAGGATTAGAGACCCCGTAGTCC

>Otu17631

CCAGCCTACGGGTCGCAGCAGTGGGGAATATTGGACAATGGGGGCAACCCTGATCCAGCG  
ACGCCGCGTGTGTGAAGAAGGCCTGCGGGTTGTAAAGCACTTTTAGTGGGGATGAAAAGC  
TCAGAGCTAATACCTCTGGGTCTTGACCTAACCCACAGAAAAAGCACCGGCTAACTCTGT  
GCCAGCAGCCGCGGTAATACAGAGGTTGCGAGCGTTAATCGGAATTACTGGGCGTAAAGC  
GTGCGTAGGTGGTTTTGTAAAGTCAGATGTGAAATCCCTGGGCTCAACCTGGGAACTGCAT  
TTGAAACTGCATGGCTAGAGTATCGAAGAGGGAAGTGGAATTTCCGGTGTAGCGGTGAAA  
TGCGTAGATATCGGAAGGAACACCAGTGGCGAAAGCGACTTCCTGGTTCGAATACTGACGT  
TCATATGCGAAAAGCGTGGGGAGCAAACAGGATTAGAAAACCCCGGTAGTCC

>Otu17632

CCAGCCTATGGGAGGCAGCAGTGGGGAATATTGCGCAATGGGCGAAAGCCTGACGCAGCG  
ACGCCGCGTGGAGGATGAAGTCTTTTGGATTGTAAACTCCTGTTAAGTGGAAGAAAAGC  
TTTGTTTTAATAGAACTGAGCAATGACGGTACCATTAGAGAAAGCACCGGCTAATCTCGT  
GCCAGCAGCCGCGGTAATACGAGAGGTGCAAGCGTTATTCGGAATTATTGGGCGTAAAGG  
GTGCGTAGGTGGTATAGTAAGTCAACTGTAAAATTCCTCAGCTTAAGTGGGGCTCGCAG  
TAGAACTGTTATGCTAGAGGGTGGGAAGAGAGAAGTGGAATTCCTCGGAGTAGCGGTAAAA  
TGCGTAGATCTCGAGAGGAACACCGATGGCGAAGGCAGCTTCTTGGTCCACTACTGACAC  
TGAGGCACGAAAAGCGTGGGGAGCAAACAGGATTAGAAAACCCAGTAGTCC

>Otu17653

CCAGCCTATGGGTGGCAGCAGCAAGGAATAGTAGGCAATGGGCGAAAGCCTGACCTCGCG  
ACGCCGCGTGAAGGATGAAGGCCTTCGGGTCGTAAACTTCTTTTCTCAGGGATGAATAAT  
GACAGTACCTGGGGAATAAGTCACGGCTAACTACGTGCCAGCAGCCGCGGTAATACGTAG  
GTGGCTAGCGTTATCCGGATTTACTGGGCGTGAAGAGTGCCTAGGCGGCCTTTCAAGTCA  
GGTGTAAAATCTCTCGGCTTAACCGGGAGGGACCATCTGATACTGTTGGGCTAGAGTACA  
GCAGAGGGAAGCGGAATTCCTGGTGTAGTGGTGGGAATGCGTAGATATCGGGAGGAACACC  
AGTGGCGAAAGCGGCTTTCTGGGCTGTTACTGACGCTCATACAGAAAGCTAGGGTAGTA  
AACGGGATTAGATACCCCTCGTAGTCC

>Otu17654

CCAGCCTATGGGGTGCAGCAGTGGGGAATATTGGACGATGGGCGCAAGCCTGATCCAGCC  
ATGCCGCGTGAGTGATGAAGGCCTTAGGGTTGTAAAGCTCTTTTACCCGGGAAGATAATG  
ACTGTACCGGGAGAATAAGCCCCGGCTAACTTCGTGCCAGCAGCCGCGGTAATACGAAGG  
GGGCTAGCGTTGTTCCGATTTACTGGGCGTAAAGCGCACGTAGGCGGACTTTTAAGTCAG  
GGGTGAAATCCCAGAGCTCAACTCTGGAAGTGCCTTTGATACTGGAAGTCTTGAGTATGG  
AAGAGGTTGGTGGAACTGCGAGTGTAGAGGTGAAATTCGTAGATATTCGCAAGAACACCA  
GTGGCGAAGGCGGCAACTGGTCCATTACTGACGCTGAGGTGCGAAAGCGTGGGGAGCAA  
ACAGGATTAGATACCCCGTAGTCC

>Otu17662

CCAGCCTACGGGTCGCAGCAGTGGGGAATTTTCGCAATGGGCGAAAGCCTGACGGAGCA  
ATACCGCGTGAGGGACGAAGGTCTGTGGATTGTAAACCTCTTTTGTGAGGGACGATAATG

ACGGTACCTGACGAATAAGCATCGGCTAACTCCGTGCCAGCAGCCGCGGTAAGACGGAGG  
ATGCAAGCGTTATCCGGAATTATTAGGCGTAAAGCGTACGCAGGTGGCTGAGCAAGTCTT  
TTGTCAAAGCGCGAGGCTTAACCTCGTAAAGGCAGAGGAACTGTTCCGGCTAGAGTATGG  
TAGGTGCAGGAGGAATTCCTGGTGTAGCGGTGAAATGCGTAGATATCGGGAAGAACACCA  
GCGGCGAAAGCGTCCTGCAAAGCCAAACTGACACTCATGTACGAAAGCTAGGGGAGCGA  
ATGGGATTAGATACCCTCGTAGTCC

>Otu17672

CCAGCCTATGGGGGGCTGCAGTCGAGAATTTTTTCACAATGGGCGAAAGCCTGATGGAGCG  
ACGCCGCGTGGGGGATGAATGACTTCGGCCCGTAAACCCCTGTCATTCGCGATCAAACGT  
TGTTGTTTTAAGAGATGGCAACCTGATAGTAGCGGAAGAGGAAGGGACGGCTAACTCTGTG  
CCAGCAGCCGCGGTAATACAGAGGTCCCAAGCGTTGTTCCGATTCACTGGGCGTAAAGGG  
TGCGTAGGTGGTGAGATAAGCCGGATGTGAAAGCTCGGAGCTCAACTCCGAAATGGCATT  
GGATACTATCTCGCTCGAGGAATGGAGGGGGGACTGGAATTCTCGGTGTAGCAGTGAAAT  
GCGTAGATATCGAGAGGAACACCAGTGGCGAAGGCGAGTCTCTGGACGACTCCTGACACT  
GAGGCACGAAAGCTAGGGGATCAAACAGGATTAGATACCCTAGTAGTCC

>Otu17678

CCAGCCTATGGGGGGCTGCAGTCGAGGATTTTTTCTCAATGGGGGAAACCCTGAAGGAGCG  
ACGCCGCGTGGGGGATGAAGGTCTTCGATTGTAAACCCCTGTCACCCGGGATCAAGGTT  
CCGCGGGCAAATAGTCCGCGGAATTGATAGTACCGGGAGAGGAAGCCGTGGCTAACTCTG  
TGCCAGCAGCCGCGGTAATACAGAGACGGCGAGCGTTGTTCCGATTCAATTGGGCGTAAAG  
GGTGCGCGGGCGGTCTGGTAAGTCGGATGTGAAATCTCATAGCTTAACTGTGAAAGGTCA  
TTCGAAACTGCCGGGCTCGAGGGCTGGAGAGGAGACTGGAATTGTCCGTGTAGCAGGTGAA  
ATGCGTAGATATCGACAAGAACACCGGTGGCGAAGGCGGGTCTCTGGACAGTTCCTGACG  
CTCATGCACGAAAGCCAGGGGAGCAAACGGGATTAGATACCCAGTAGTCC

>Otu17690

CCAGCCTACGGGGTGCTGCAGTGGGGAATTTTACGCAATGGGGGAAACCCTGACGCAGCA  
ACGCCGCGTGGAGGATGAAGCCCCTTGGGGTGTAAGCTCCTTTTCGATCGGGACGATTATG  
ACGGTACCGGATGAAGAAGCACCGGCTAACTCTGTGCCAGCAGCCGCGGTAATACAGAGG  
GTGCAAGCGTTGTTCCGAATTATTGGGCGTAAAGGGCGCGTAGGCGGTGCGGTAAGTCTG  
TTGTGAAATCTCCGGGCTCAACTCGGAGCCTGCAACGGAAACTGCCGTGCTGGAGTATGG  
GAGAGGTGAGTGGAATTCACAGTGTAGCGGTGAAATGCGTAGATATCGGGAGGAACACCT  
GTGGCGAAAGCGGCTCACTGGACCATAACTGACGCTGAGGCGCGAAAGCTAGGGGAGCAA  
ACAGGATTAGAGACCCTCGTAGTCC

>Otu17695

CCAGCCTATGGGGTGCTCCAGTAGGGAATATTCCGCAATGGGCGAAAGCCTGACGGAGCG  
ACGCCGCGTGAGCGATGAAGGCCTTCGGGTGTAAAGCTCTGTCAAGAGGGAAGAAGGGT  
GCCGTTTCGAACAGGGCAGGCACCTTGACGGTACCTCTGGAGGAAGCCCCGGCTAATTACG  
TGCCAGCAGCCGCGGTAATACGTAAGGGGCGAGCGTTGTCCGGAATCACTGGGCGTAAAG  
GGCGCGTAGGCGGCCATATAAGTCAGGGGTGAAAGCTGTGGGCTCAACTCACAAATTGCC  
CTTGAAACTGCATGGCTTGAGTTCTGCAGGGGAAAGTGGAATTCACGGTGTAGCAGGTGAA  
ATGCGTAGATATCGTGGAGAACACCTATGGCGAAGGCAGCTTTCTGGGCAGACACTGACG  
CTGAGGCGCGAAAGCTAGGGGAGCGAACAGGATTAGATACCCCGTAGTCC

>Otu17702

CCAGCCTACGGGGTGCGAGCAGTAAGGAATATTGGACAATGGGCGCAAGCCTGATCCAGCC  
ATGCCGCGTGAGCGATGAAGGCCTTCGGGTGTAAGCTCTGTTGTAGGGGAAGAATGTT  
ACGGGGAGTAATATGCCCTGTAAATGACGGTACCCTACGAGTAAGCCCCGGCTAACTACG  
TGCCAGCAGCCGCGGTAAGACGTAGGGGGCGAGCGTTGTCCGGAATTAAGGGCGTAAAG  
AGCACGTAGGCGGATATTTAAGTCAGGTGTGAAAGACCGGGGCTCAACTCCGGGGTTGCA  
CCTGAAACTGGGTATCTTGAGGGCAGGAGAGGGCAGTAGAATTCCTGGTGTAGCAGGTGAA  
ATGCGTAGAAATCAGGAGGAATACCAGTGGCGAAGGCGACTGTCTGGACTGACCCTGACG  
CTGAGGTGCGAAAGCGTGGGTAGCAAACAGGATTAGAGACCCCGTAGTCC

>Otu17725

CCAGCCTACGGGTGGCAGCAGTGAGGAATATTGCTCAATGGCCGAAAGGCTGAAGCAGCA  
ACGCCGCGTGAGGGATGAAGGTTCTATGAATTGTAAACCTCTGTAGAAAGGGAGAAATAT  
TCGCCTTGGGCGAATTGATAGTACCTTTAAAGTAAGCCCCGGCTAACTACGTGCCAGCAG  
CCGCGGTAATACGTAGGGGGCAAGCGTTGTCCGGAATCACTGGGTGTAAAGGGTGCTCAG  
GCGGATTTATAAGTCGTGGGTGAACTCTGCAGCTTAACTGCAGAACTGCCCATGATACT  
GTAAGTCTAGAGTGCGGGAGAGGGTAACGGAATTCTTGGTGTAGCAGGTGAAATGCGTAGA

TATCAAGAAGAACACCAGTTGCGAAGGCGGTTACCTGGCCCCGATACTGACGCTCAAGCAC  
GAAAGCGTGGGGAGCAAACAGGATTAGAAACCCGTGTAGTCC

>Otu17741

CCAGCCTACGGGACGCACCAGTAAGGGATATTGCGCAATGGGCGAAAGCCTGACGCAGCA  
ACGCCGCGTGAGGATGACGGCCTTCGGGTGTAAACTCCTTTTGGCCCGGACGAGGAAG  
GACGGTACGGGTGAAGAAGTCACGGCTAACTACGTGCCAGCAGCCGCGGTAACACGTAG  
GAGGCAAGCGGTATCCGGATTACTGGGCGTAAAGCGCATGCAGGTGGTTCGGTAAGTTG  
GATGTGAAAGCTCCTGGCTCAACTGGGAGAGGTCGTTCAATACTACCGGACTTGAGAGCA  
GTAGAGGAAGGTGGAATTCCCGGTGTAGTGGTGAAATGCGTAGATATCGGGAGGAACACC  
AGTGGCGAAAGCGGCCTTCTGGACTGTTTCTGACACTCATATGCGAAAGCTAGGGGAGCG  
ATCCGGATTAGAAACCCCGGTAGTCC

>Otu17748

CCAGCCTACGGGACGCTGCAGTCGAGAATCTTCCGCAATGGACGAAAGTCTGACGGGGCG  
ACGCCGCGTGATGATGAAGTTCTTCGGAATGTAAATCCTTTTGCCAGGGAAAAAGTTA  
TTGATTGTACCTGGAGAATAAGAGGTTGCTAAACTCGTGCCAGCAGCAGCGGTAATACGA  
GTGCCTCAAGCGTTATCCGAAATCATTGGGCGTAAAGGGTGTGTAGGTGGCATTGTTAGT  
CTCGCGTTAAATTTACCGGCTCAACCGGTAAGCTGCGTGGGAAACGGCAGAGCTAAGAGG  
ACGGTAGAGGTCTCTGGAACCTCATGGTGTAGCGGTGAAATGCGTTGATATCATGGGGCAC  
ACCAAAGCGAAGGCAAGAGACTGGACCGCTCCTGACACTGAAACACGAAAGCGTGGGTC  
GCGAATGGGATTAGAGACCCCGTAGTCC

>Otu17751

CCAGCCTATGGGGTGCAGCAGTGGGGAATATTGGACAATGGGCGCAAGCCTGATCCAGCC  
ATGCCGCGTGAGTGATGAAGGCCTTAGGGTTGTAAAGCTCTTTTGCCCGGGAAGATAATG  
ACGGTACCGGGAGAATAAGCCCCGGCTAACTTCGTGCCAGCAGCCGCGGTAATACGAAGG  
GGGCTAGCGTTGCTCGGAATCACTGGGCGTAAAGCGCACGTAGGCGGATCGTTAAGTCAG  
AGGTGAAATCCTGGAGCTCAACTCCAGAACTGCCTTTGATACTGGCGATCTTGAGTTCGA  
GAGAGGTGAGTGGAACCTGCGAGTGTAGAGGTGAAATTCGTAGATATTCGCAAGAACACCA  
GTGGCGAAGGCGGCTCACTGGCCCGGAACTGACGCTGAGACACGAAAGCGTGGGTAGCAA  
ACAGGATTAGATACCCGAGTAGTCC

>Otu17753

CCAGCCTATGGGATGCACCAGTAGGGAATATTGCACAATGGGCGAAAGCCTGATGCAGCA  
ATGCCGCGTGAGTGATGAAGGCCTTCGGGTGCTAAACTCTTTTCTGAGGGAAGAATGGC  
TGGGATAGGAAATGATCCTGGCGTGACGGTACCTCAGGAATAAGCAACGGCTAACTCCGT  
GCCAGCAGCCGCGGTAATACGGAGGTTGCGAGCGTTGTTTCGGAATTACTGGGCGTAAAGG  
GAGCGCAGGCGGTTTGGTAAGTCTGGAGTGGAAGCACGGGGCTCAACCCCGCCGGGTCTC  
TGGATACTGCCGAACCTTGAGTACGTGAGAGGAGAGCGGAATTCAGGTGTAGCGGTGAAA  
TGCGTAGATATCTGGAGGAACACCGGTGGCGAAGGCGGCTCTCTGGCACGAAACTGACGC  
TGAGGCTCGAAAGCATGGGGAGCGAACGGGATTAGATACCCGAGTAGTCC

>Otu17771

CCAGCCTATGGGGGGCTCCAGTGGGGAATATTGGACAATGGGGGAGACCCTGATCCAGCA  
ATGCCGCGTGTTGAAGAAGGTCTTCGGATTGTAAAGCACTTTCGACGGGGACGATGATG  
ACGGTACCCGTATAAGAAGCCCCGGCTAACTTCGTGCCAGCAGCCGCGGTAATACGAAGG  
GGGCTAGCGTTGCTCGGAATGACTGGGCGTAAAGGGCGCGTAGGCGGCGATCAAAGTCAG  
GCGTGAAATTCCTGGGCTCAACCTGGGGGCTGCGCTTGATACTTGTTGCTTGAGTGGGG  
AAGAGGGTCGTGGAATTCACAGTGTAGAGGTGAAATTCGTAGATATTGGGAAGAACACCG  
GTGGCGAAGGCGGCGACCTGGTCCTTTACTGACGCTGAGGCGCGAAAGCGTGGGGAGCAA  
ACAGGATTAGAACCCCGTAGTCC

>Otu17781

CCAGCCTATGGGTCGCAGCAGTCGAGAATTTTCTCAATGGGGGCAACCCTGAAGGAGCG  
ACGCCGCGTGAGGATGAAGGTCTTCGGATTGTAAACTCCTGTTCATTGGTGAACAAGGCG  
GCCGTTAACTGCGGAGCCGCTCGATAGTAGCCGAAGAGGAAGAGACGGCTAACTCTGTG  
CCAGCAGCCGCGGTAATACAGAGGTCTCGAGCGTTGTTTCGGATTTCATTGGGCGTAAAGGG  
TGCGTAGGCGGTCGGGTAAGTCTGACGTGAAATCTCCGGGCCTAACCCGAAACTGCGTC  
GGATACTATCCGGCGAGAGGATTGGAAGGGAGACTGGAATACTTGGTGTAGCAGTGAAAT  
GCGTAGATATCAAGTGGAACACCAGTGGCGAAGGCGAGTCTCTGGACAATTCCTGACGCT  
GAGGCACGAAAGCCAGGGGAGCAAACGGGATTAGATACCCCTGTAGTCC

>Otu17791

CCAGCCTATGGGGTGCAGCAGTGGGGAATATTGGACAATGGGGGAAACCCTGATCCAGC

AATGCCGCGTGTGTGAAGAAGGTCTTCGGATTGTAAAGCACTTTTGGCAGGGACGATGAT  
GACGGTACCTGCAGAATAAGCCCCGGCTAACTTCGTGCCAGCAGCCGCGGTAATACGAAG  
GGGGCTAGCGTTGCTCGGAATGACTGGGCGTAAAGGGCGCTAGGCGGCTGTCACAGTCA  
GAAGTGA AATTCTGGGCTCAACCTGGGGACTGCTTTTGAGACTGCATGGCTAGAGTATC  
GAAGAGGGAAGTGA AATTTCCGGTGTAGCGGTGAGATGCGTAGATATCGGAAGGAACACC  
AGTGGCGAAAGCGACTTCCTGGTCAATACTGACGTTTATGTGCGAAAGCGTGGGGAGCA  
AACAGGATTAGAAACCCAGTAGTCC

>Otu17797

CCAGCCTATGGGTGGCTCCAGTGAGGAATATTGGGCAATGAGCAAAAGCTTGACCCAGCG  
AGAATTTTATGTGCGAAGAAGGCTTAAGCTGTAAAGCACTTTCGGATAGAAAGATAATGAC  
GGTACTATAAGTAAAGAAGCACTGGCTAAGTCTGTGCCAGCAGCTGCGGTAATACAGACA  
GTGCAAGCGTTATTTCGGATTTAATGGGCGTAAAGGGTATGTAGGTGGTTCAAAAACTAT  
ATTAAAAAGATTGGAATAATAATTTTAGTAATAATATAAAGATTAGCGAACTTAGAGTAA  
ATAAGAAGTAGGAAGAATTTTTCATGTAAACGGTAGAATGTGATCATATGAAAAGGACTA  
CCAGAGGCGAAGGCATCTATCTATTATTTTACTGTCACTGAGGTACGAAAGCATGGGGA  
GCAAATCAGATTAGATACCCTAGTAGTCA

>Otu17803

CCAGCCTACGGGTGCGAGCAGTCGAGAATTTTTCTCAATGGGGGAAACCCTGAAGGAGCG  
ACGCCGCGTGAGGATGAAGGCTTTCGGGTGTAAACTCCTGTCATTTGGGAACAAGGCC  
TTACGTTAACTGCGTGGAGGTTTGATAGTACCTCAAGAGGAAGAGACGGCTAACTCTGTG  
CCAGCAGCCGCGGTAATACAGAGGTCTCAAGCGTTGTTTCGGATTTCATTGGGCGTAAAGGG  
TGCGTAGGCGGCGAAGCAAGTCAGGTGTGAAATCCCGGGGCTCAACCCCGGAAGTGCAT  
TGATACTGCTTTGCTTGAGGACTGGAGAGGGGATCGGAATTCACGGTGTAGCAGTGAAAT  
GCGTAGATATCGTGAGGAAGGCCAGTGGCGAAGGCGGATCTCTGGACAGTTCCTGACGCT  
GAGGGACGAAAGCTAGGGGAGCAAACAGGATTAGAGACCCCAAGTAGTCC

>Otu17820

CCAGCCTACGGGACGCAGCAGTCGGGAGAAATTTCTGCAATGCGCGCAAGCGTGACAGAGCA  
AGCCAGAGTGCGTTTCTATAAATTGAAACGCTTTTGTGCGATGTAAAAAGTCGCACGAATA  
AGGACTGGGCAAGACCGGTGCCAGCCGCCGCGGTAATCCCGGCGGTCCAAGTCGCAGCCA  
CGTTTACTGGGTCTAAAACATCCGTAGCTAGCCGTGTAAGTCTTGTGTGAAATCGGGCAT  
CTTAAGTGTCCGGCGGGCACAAGATACTGCTCGGCTCGAGACCGGGAGATGTAAGGAGTA  
CGCTCGGGGTAGCGGTAAAATGCGTTGATCCCGTGTGGACTAACGACAGCGAAGGCACCT  
TACAAGAACGGATCTGACAGTGAGGGATGAAGGCCAGGGGCGCAAAGTGGATTAGAGACC  
CCTGTAGTCC

>Otu17844

GGACTACGAGGGTTTCTAATCCTGTTTGCTCCCCACGCTTTCGCGCCTCAGCGTCAGTCA  
AGGACCAGGTTGCCGCCTTCGCCACCGGTGTTCTTCCCAATATCTACGAATTTACCTCT  
ACACTGGGAATTCCACAACCCCTCTTCCTCACTCAAGTCTGCACGTATCAAATGCAGCCCC  
CAGGTTGAGCCCGGGAATTTACATCTGACTGTACAAACCGCCTACGCGCCCTTTACGCC  
CAGTCATTCCGAGCAACGCTAGCCCCCTTCGTATTACCGCGGCTGCTGGCACGAAGTTAG  
CCGGGGCTTCTTCTACGGGTACCGTCATCATCGTCCCCGTCGAAAGAGCTTTACAATCCG  
AAGACCTTCTTCACTCACGCGGCATTGCTGGATCAGGCTTGCGCCCATTGTCCAATATTC  
CCCCTGGTGCCCTCCCATAGGCTGG

>Otu17849

CCAGCCTATGGGGGGCTCCAGTGGGGAATATTGGACAATGGGGGAAACCCTGATCCAGCA  
ATGCCGCGTGAGTGATGAAGGCCTTAGGGTTGTAAAGCTCTTTCGGGTGGGGACGATAAT  
GACGGTACCCGCGAGAATAAGCCCCGGCTAACTTCGTGCCAGCAGCCGCGGTAATACGTAG  
GGGCAAGCGTTGTCCGATTACTGGGCGTAAAGCGCACGCAGGCGGTCGTGCCAGTTT  
CCTCTGACAGGTGGGGCTTAACCCTGGCAGGCGAGGAAAGACGACACGACTTGAGGACT  
TCAGAGGGACGTGGAATTCCAGGTGGAGCGGTGAAATGCGTAGAGATCTGGAAGAACACC  
AAAGGCGAAGGCAGCGTCTCGGGAAGTAACTGACGCTCATGTGCGAAAGCTAGGGTAGCG  
AACGGGATTAGATACCCAGTAGTCC

>Otu17864

CCAGCCTACGGGACGCACCAGTGGGGAATTTTGGACAATGGGGGAAACCCTGATCCAGCA  
ACGCCGCGTGAAATGAAGAAGGCCTTAGGGTTGTAAAGTTCTTTTATCTGGAAGCAAAGGA  
TATATGTTAATACCATGTATAGATGAGAGTACCAGAAGAATAAGCACCGGCTAACTACGT  
GCCAGCAGCCGCGGTAATACGTAGGGTGCGAGCGTTAATCGGAATTACTGGGCGTAAAGG  
GTGCGCAGGCTGATTTGTAAGTTAGATGTGAAATGCCTGGGCTTAACCTAGGAAGTGCAT

TTAAGACTGCAAGTCTAGAGTTTGTGTCAGAGGGGGGTAGAATTCCAAGTGTAGCAGTGAAA  
TGCGTAGAGATTTGGAGGAATACCGATGGCGAAGGCAGCCCCCTGGGATAGAACTGACGC  
TCATGCACGAAAGCGTGGGTAGCAAACAGGATTAGAAACCCTAGTAGTCC

>Otu17871

CCAGCCTATGGGTGCTGCAGTGAGGAATCTTGCGCAATGGGCGAAAGCCTGACGCAGCGA  
CGCCGCGTGAAGGATGACGGTCTTCGGATTGTAAACTTCTGTTAAGTGGGAAGAAAGGCC  
TGTCTCTAATACAGACAGGATATGACGGTACCGCTAGAGAAAGCACC GGCTAACTTCGTG  
CCAGCAGCCGCGGTAATACGAGGGGTGCAAGCGTTATTTCGGATTAATTGGGCGTAAAGGG  
TGCGCAGACGGTTTGTTAAGTCACTTGTTAAATTCTTCGGCCTAACTGAAGGTGTGCGAG  
TGATACTGGCGAACTAGAGGGTGGAAGAGAGAAGTGGAATTCTCGGAGTAGCGGTAAAT  
GCGTAGATCTCGAGAGGAACACCAATGGCGAAGGCAGCTTCTTGGTCCATTCCTGACGTT  
CATGCACGAAAGCGTGGGGAGCAAACAGGATTAGAAACCCGCGTAGTCC

>Otu17877

CCAGCCTACGGGTGCGCAGCAGTAACGAATATTGGGCAATGGGCGCAAGCCTGACCCAGCG  
ACGCCGCGTGGAGGACGAAGTCCTTCGGGATGTAAACTCCTGTCAGGGGTTAGAAAAGTTC  
TGATCAACCCAGAGGAAGGCACGGCTAACTCTGTGCCAGCAGCCGCGGTAAGACAGAGG  
TGCCAAGCGTTAGGCGGAATCACTGGGCTTGAAGCGTGTGTAGGCGGACGTCTAAGTACC  
TTGTGAAATCCACGGCTCAACCGTGGAAGTCTGTTGGGTATACTGGGCGTCTTGAGCCAGC  
TAGGGGTGCTCGGAACAAGCGGTGGAGCGGTGAAATGCGTAGATATCGCTTGGAACGCCA  
AAGGTGAAAACAGACGACTGGGGCTGTGCTGACGCTGAGACACGAAAGCCAGGGGAGCAA  
ACGGGATTAGATACCCTAGTAGTCC

>Otu17884

CCAGCCTATGGGGGGCTCCAGTAGGGAATATTGGACAATGGGCGAGAGCCTGATCCAGCC  
ATGCCGCGTGCAGGAAGAAGGCCTTCTGGGTGTAAACTGCTTTTGCCAGGGGATAAAAG  
ACCCGTGCGCGGGGAATTGAAGGTACCTGGTGAATAAGCCACGGCTAACTACGTGCCAGC  
AGCCGCGGTAATACGTAGGTGGCAAGCGTTGTCCGGATTTATTGGGTTTAAAGGGTGCCT  
AGGCGGCCCTGTAAGTCAGTGGTGAATACGGCAGCTCAACTGTGAGGTGCCATTGATA  
CTGCAGGGCTTGAGTACAGACGAGGTAGGCGGAATTGACGGTGTAGCGGTGAAATGCGTA  
GATATCAGGAGGAACACCTGTGGCGAAAGCGGCTCACTGGACCATAACTGACGCAGAGGC  
TCGAAAGCTAGGGGAGCAAACAGGATTAGGACCCAGTAGTCC

>Otu17899

CCAGCCTACGGGGGGCAGCAGTCGAGAATTTTTCACAATGGGGGAAACCCTGATGGAGCG  
ACGCCGCGTGGGGGATGAAGGTCTTCGGATTGTAAACCCCTGTCACCGGGGAAGAAACGC  
TTTGAGCTAACAGTTCAAAGCCTGACTTAACCCGGAGAGGAAGCAGTGGCTAACTCTGTG  
CCAGCAGCCGCGGTAATACAGAGACTGCAAGCGTTATTTCGGATTCACTGGGCGTAAAGGG  
TGCGCAGGCGGCTAAGTGTGTGATGTGAAATCCCGAGGCTTAACCTCGGAAGTGCCTC  
TGAAACTACTTGCTAGAGTATTGGAGAGGGTAACGGAATTCACGGTGTAGCAGTGAAAT  
GCGTAGATATCGTGAGGAACACCAGAGGCGAAGGCGGTACCTGGACAATTACTGACGCT  
CAGGCACGAAAGCGTGGGGAGCAAAGGGATTAGATACCCCGTAGTCC

>Otu17900

CCAGCCTATGGGGGGCTGCAGCTAAGAATCTTCCGCAATGGACGAAAGTCTGACGGAGCG  
ACGTGCGGTGGGTGATGAAGGCGGAAACGTTGTAAACCCCTTTTATAGACGAGGAATAAG  
GCGGGGAGGGAATGCCCTGCTGATGACGGTAGTCTGTGAATAAGCCCCGGCTAATTACGT  
GCCAGCAGCCGCGGTAACACGTATGGGGCGAGCGTTGTTTCGGAATTATTGGGCGTAAAGG  
GCGTGCAGGCGGTGATGCAAGTCTGACATGAAATATCCAGGCTCAACCTGGAAAACGCGT  
TGAAACTGTGTGGCTAGAGTTCTGGAGGGGTAGCTGGAATTCCAGGTGTAGGGGTGAAA  
TCTGTAGATATCTGGAAGAACATCAGTGCGAAGGCGAGCTACTGGCCAAGAACTGACGC  
TGAGACGCGAAAGCGTGGGGAGCAAACAGGATTAGAAACCCGCGTAGTCC

>Otu17904

CCAGCCTATGGGAGGCACCAGTAGGGAATCTTGCGCAATGGGCGAAAGCCTGACGCAGCG  
ACGCCGCGTGGGTGATGAAGGCCTTCGGGTGTAAAGCCCTGTGGGGAGCAACGAATAAG  
GCGGCGTGAATATCGCCGTCGATGACGGTAGTCTCTTAGCAAGCACC GGCTAACTCTGTG  
CCAGCAGCCGCGGTAATACAGAGGGTGCAAACGTTGTTTCGGAATTACTGGGCGTAAAGCG  
CGTGTAGGCGGCTTCGCAAGTCGGATGTGAAAGCCCTGGGCTCAACCTGGGAAGTGCATT  
CGAAACTGCGTCGTTGAGTCCCGGAGAGGATGGTGGAAGTCTCGGTGTAGAGGTGAAAT  
TCGTAGATATCGGGAAGAACATCGGTGGCGAAGGCGGCCATCTGGACGGTGAAGTACGCT  
GAGACGCGAAAGCGTGGGGAGCAAACAGGATTAGATACCCGAGTAGTCC

>Otu17916

CCAGCCTACGGGGGGCTGCAGTCGAGAATATTTTCACAATGGACGAAAGTCTGATGAAGCG  
ACGCCGCGTGAACGATGAAGTATTTTCGGTATGTAAAGTTCTTTTATGTAGGAAAAACGAT  
GATTGTACTACATGAATAAGGGGTTGCTAAACTCGTGCCAGCAGCAGCGGTAATACGAGT  
ACCCCAAGCGTTATCCGGAATTATTGGGCGTAAAGGGTGAGTAGGTTGTTTTATTAGTCA  
GATGTCAAAGCTCCAGGGCTCAACCTTGAATCGCATTGTAAACGGTAAAACCTAGAATAC  
GTGAGAGGTTAGTGGAACCTCTATGTGTAGGGGTAAAATCCGTTGATATATAGGGGAACAC  
CAAAAGCGAAGGCAGCTAACTGGCACATTATTGACACTGAATCACGAAAGCGTGGGTAGC  
GATACGGATTAGAAACCCTTGTAGTCC

>Otu17930

GGACTACGGGGGTTTCTAATCCTGTTTGCTCCCCACGCTTTCGTGTCTCAGCGTCAGTAT  
TCGTCCAGTTGGCCGCTTCGCCACCGGTGTTCTCTTGATATCTACGAATTTACCTCT  
ACACCAAGAATTCCACCAACCTCTCCGATACTCAAGCTAAGCAGTATCAAATGCACTTCC  
CGGGTTGAGCCCGGGGCTTTCACATCTGACTTACTTAGCCGCCTACACACGCTTTACGCC  
CAGTAATTCCGAACAACGTTTGCACCCTCTGTCTTACCGCGGCTGCTGGCACAGAGTTAG  
CCGGTGCTTGCTAAGGAGGTACCGTCATCATAGAAGGTATTCGCTTCTACTTATTCGTCC  
CTCTCCACAGAGCTTTACAACCCGAAGGCCCTTCATCACTCACGCGGCGTCGCTGCGTCAG  
GCTTTCGCCCATTGCGCAAGATTCCCCACTGCTGCCCCCGTAGGCTGG

>Otu17934

CCAGCCTATGGGAGGCAGCAGTCGAGAATTTTTCTCAATGGGCGAAAGCCTGAAGGAGCG  
ACGCCGCGTGAAGGAAGAAGGTCTTCGGATCGTAAACTTCTGTCAATTTGGGAGTAAGGAG  
TTAGAGAGTAACTGCTCTGGCTTTGATAGTACCAGAAGAGGAAGGGACGGCAAACCTCTGT  
GCCAGCAGCCGCGGTAATACAGAGGTCCCGAGCGTTGTTTCGGATTCAATGGGCGTAAAGG  
GTGCGTAGGCGGTACGGTAAGTCAGGTGTGAAAGCCTGGGGCTCAACCCCAGAAGAGCAC  
TTGAAACTGCCGAAGTAGAGAACTGGAGAGGAGACTGGAATTCACGGTGTAGCAGTGAAA  
TGCGTAGATATCGTGAGGAAGGCCAGTGGCGAAAGCGGGTCTCTGGACAGGATCTGACGC  
TGAGGCACGAAGGCTAGGGGAGCAAACGGGATTAGAAACCCCTGTAGTCC

>Otu17942

CCAGCCTATGGGGGGCACCAGTCGAGAATTTTTCTCAATGGGCGAAAGCTTGAAGGAGCG  
ACGCCGCGTGGGGGATGAAGGGCTTCGGCCTGTAAACCCCTGTCATTTGCGAACAAACCC  
ACTCATCGAATACATGGGTGGCTGATAGTAGTGAAAGAGGAAGGGACGGCTAACTCTGTG  
CCAGCAGCCGCGGTAATACAGAGGTCCCAAGCGTTGTTTCGGATTCACTGGGCGTAAAGGG  
TGCGTAGGCGGTTTGATAAGTCTGATGTGAAATCCCGCAGCTTAACTGCGGAAGTGCATT  
GGAACTATCTGACTAGAGGAATGGAGGGGAGACTGGAATACTTGGTGTAGCAGTGAAAT  
GCGTAGATATCAAGTGGAACACCAGTGGCGAAGGCGAATCTCTGGACATTTCTCTGACGCT  
GAGGCACGAAAGCCAGGGGAGCAAACGGGATTAGAAACCCGAGTAGTCC

>Otu17950

CCAGCCTACGGGGTGCAGCAGTGGGGAATCTTGCGCAATGGACGAAAGTCTGACGCAGCC  
ACGCCGCGTGAGTGAAGAAGGCCTTCGGGTGTAAAGCTCTGTGCGGAGGGACGAAACCC  
CATTCGGTTAATAGCCGAGTGGACTGACGGTACCTCCAAAGGAAGCACCGGCTAACTTCG  
TGCCAGCAGCCGCGGTAATACAGAGGGTGAAGCGTTGCTCGGAATTATTGGGCGTAAAG  
GGTAGGTAGGTGGTCTCATTTGTCTAGGGTGAATCCTTGAGCTTAACTCAAGAAGTGCC  
CTAGAAACGGTGAGACTCGAGTACTGGAGAGGGTTCGTGGAATTCCCGGTGTAGCGGTGAA  
ATGCGTAGAGATCGGGAGGAACACCAGAGGCGAAGGCGGCGACCTGGACAGTAACTGACA  
CTCAACTACGAAAGCGTGGGGAGCAAACAGGATTAGAAACCCTTGTAGTCC

>Otu17951

CCAGCCTATGGGGTGCAGCAGTGGGGAATCTTGCAATGGGGGAAACCCTGATGCAGCG  
ACGCCGCGTGAGCGATGAAGCCCCTCGGGGTGTAAAGCTCTTTCGGCAGGAACGATAATG  
ACGGTACCTGAAGAAGAAGCTGCGGCTAACTACGTGCCAGCAGCCGCGGTAATACGTAGG  
CAGCGAGCGTTGTTTCGGAATTACTGGGCGTAAAGAGTGCGTAGGCGGTTTGGTAAGTCTC  
TTGTGAAATCTCTGGGCTCAACTCAGAGCTTGCAAGGGAAACTGCCGGGCTTGAGTGTGG  
GAGAGGTGAGTGGAATTTCCGGTGTAGCGGTGAAATGCGTAGATATCGGAAGGAACACCT  
GTGGCGAAAGCGGCTCACTGGACCACAACCTGACGCTGATGCACGAAAGCTAGGAGAGCAA  
ACAGGATTAGATACCCGCGTAGTCC

>Otu17952

CCAGCCTACGGGTTGCTGCAGTCGAGAATTTTTTCACAATGGGCGCAAGCCTGATGGAGCG  
ACGCCGCGTGCGGGATGAAGGCCCTTCGGGTGTAAACCGCCGTCGGAGTGGAGGAAATTT  
TGTGGGGCAATCCCCATGACTTGACTAATACTCAGAGGAAGGACGGGCTAAGTTTCGTGCC  
AGCAGCCGCGGTAAGACGAACCGTCCAAACGTTATTTCGGAATCACTGGGCTTAAGGGTGC

GTAGGCGGCTCAGAAAGTAGGGTGTGAAAGCCCTCGGCTCAACCGAGGAATTGCGCTCTA  
AACTACTGGGCTTGAGGAACGCAGAGGTAAGCGGAACCTTACGGTGGAGCGGTGAAATGCG  
TTGATATCGTAAGGAACACCAGGAGCGAAAGCGGCTTACTGGGCGTTTTCTGACGCTGAG  
GCACGAAAGCTAGGGGAGCGAACGGGATTAGATACCCTCGTAGTCC

>Otu17963

CCAGCCTACGGGTGGCACCAGTGGGGAATATTGGACAATGGGGGAAACCCTGATCCAGCA  
ATGCCGCGTGAAATGATGAAGGCCTTCGGGTGTAAAGTCTTTTTATCGAGGAAGATGATG  
ACGGTACTCGAGGAATAAGCCCCGGCAAACCTTCGTGCCAGCAGCCGCGGTAATACGAAGG  
GGGCTAGCGTTGTTTCGGAATGACTGGGCGTAAAGGGCGCGTAGGCGGCCAATCAAGTTAG  
GTGTGAAATCCCTGGGCTTAACCTAGGAATGGCACTTAAGACTGACTGGCTAGAGTGCGA  
GAGGGAGAGACGGAATGACGAGTGTAGCAGTGAAATGCGTTGATATTGTTTGAACACCG  
GAGGCGAAGGCGGTCTCTTGGCTCGCAACTGACGCTAAGGCGCGAAAGCGTGGGGAGCAA  
ACAGGATTAGATACCCCAGTAGTCC

>Otu17966

CCAGCCTATGGGATGCAGCAGTGGGGAATTTTGCACAATGGGGGAAACCCTGATGCAGCA  
ACGCCGCGTGAGGATGAAGTCCCTTGGGATGTAAACTCCTTTTCGACCGGGACGATAATG  
ACGGTACCGGTGGAAGAAGCCCCGGCTAACTCTGTGCCAGCAGCCGCGGTAATACGAAGG  
GAGCTAGCGTTGTTTCGGAATTACTGGGCGTAAAGGGCGCGTAGGCGGTTTAATAAGTTGG  
ATGTGAAAGCCCAGGGCTCAACCCTGGAATTGCATTCAAGACTGTTTTACTTGAATTCGG  
TAGAGGTTGGTGGAATTCACAGTGTAGAGGTGAAATTCGTAGAGATTGGGAAGAACACCC  
GTGGCGAAGGCGGCCAACTGGACCGACATTGACGCTGAGGCGCGAAAGCGTGGGGAGCAA  
ACAGGATTAGAAAACCCCTGTAGTCC

>Otu17967

CCAGCCTACGGGAGGCTGCAGTGAGGAATTTTCGTCAATGGGGGAAACCCTGAACGAGCA  
ACGCCGCGTGAGGAAGAAGGTTTTTCGGATTGTAAACTGCTTTTCTTGGGGAAGAGAACG  
GACGGTACCCAAGGAAGAAGCCCCGGCTAACTACGTGCCAGCAGCCGCGGTAATACGTAG  
GGGGCAAGCGTTGTCCGGATTTACTGGGCGTAAAGCGCACGCAGGCGGTCGTGCCAGTTT  
CCTCTGACAGGTCGGGGCTTAACCCTGGCAGGCGAGGAAAAGACGACACGACTTGAGGACT  
TCAGAGGGACGTGGAATTCCAGGTGGAGCGGTGAAATGCGTAGATATTGGGAGGAACACC  
TGTGGCGAAAGCGGCGCACTGGACCACTACTGACGCTGAGGCGCGAAAGCCGGGGGAGCA  
AACAGGATTAGAAAACCCAGTAGTCC

>Otu17978

CCAGCCTATGGGAGGCAGCAGTGGGGAATATTGGACAATGGGCGAAAGCCTGATCCAGCA  
ATGCCGCGTGAGTGATGAAGGCCTTCGGGTGTAAAGCTCTTTCGCCTACGGCGATGGTG  
ACGGTAGTAGGAGAAGAAGCCCCGGCTAACTTCGTGCCAGCAGCCGCGGTAATACGAAGG  
GGGCTAGCGTTGTTTCGAGTTACTGGGCGTAAAGGGCGCGTAGGCGGCCCTTCAAGTCGG  
GTGTGAAAGCCCCGGGGCTCAACCCCGGAATAGCACTCGAGACTGAAGAGCTCGAGGATGG  
GAGAGGATGGTGGAATTCACAGTGTAGAGGTGAAATTCGTAGATATTGGGAAGAACACCG  
GTGGCGAAGGCGGCCATCTGGACCATTTCTGACGCTGAGGCGCGAAAGCGTGGGGAGCAA  
ACAGGATTAGAGACCCCAGTAGTCC

>Otu17981

CCAGCCTATGGGTCGCTCCAGTAACGAATCTTCCGCAATGGGCGAAAGTCTGACGGAGCA  
ATGCCGCGTGTTGGGATGAAGCGCCTCCGGCGTGTAACCCTGTGAGGGAACAGAACC  
CGATCGTTCCCAAAGGAAGTGGCGACTAACTCTGTGCCAGCAGTCGCGGTAATACAGAGG  
CCACGAGCGTTATTTCGGAATCACTGGGCTTAAAGGGTGCCTAGGTGGGCTCGCAAGCGTC  
TTGTGAAAGCCCCCGGCTCAACCCGGGAAGTGCAGGGCGAACTGCGAGTCTTGAGGCAGG  
TAGGGGCCGTTAGAACAGTAGGTGGAGCGGTGAAATGCGTAGAGATCTACTGGAATGCCG  
ATGGTGAAGACGAGCGGCTGGACCTGTCTGACACTGAGGCACGAAAGCGTGGGGAGCAA  
ACAGGATTAGAGACCCCTGTAGTCC

>Otu17992

CCAGCCTACGGGATGCAGCAGTGGGGAATCTTTCGCAATGGCCGAAAGGCTGACGCAGCG  
ACGCCGCGTGTTGGGAGGACGCCCTTCGGGGTGTAACCCTGTGCCCCGGGACGAACATC  
CACTTTCGAGTGGACTGACGGTACCGGGTGAGGAAGCACCGGCTAACTCCGTGCCAGCAG  
CCGCGGTAATACGGAGGGTGCAGCGTTGTCCGGAATCACTGGGCGTAAAGGGCGCGTAG  
GCGGCGCGGAAAGTCAACGGTGAAAGCTTGGGGCTCAACCCCGAGTCGGCCGTCGATACT  
TCCGTGCTCGAGCACTGTAGAGGCAGGTGGAATTCGGGGTGAGCGGTGGAATGCGTAGA  
GATCCGGAAGAACACCGGTGGCGAAGGCGGCCTGCTGGGCAGTAGCTGACGCTGATGCGC  
GACAGCGTGGGGAGCAAACAGGATTAGAGACCCCAGTAGTCC



>Otu17997

CCAGCCTACGGGTGGCTCCAGTGGGGAATCTTGCACAATGGGGGAAACCCTGATGCAGCG  
ACGCCGCGTGAGCGATGAAGCCCTTCGGGGTGTAAGCTCTTTTCGGCAGGGACGATAATG  
ACGGTACCTGCAGAAGAAGCTGCGGCTAACTACGTGCCAGCAGCCGCGGTAAAACGTAGG  
AGGCAAGCGTTATCCGGATTTACTGGGCGTAAAGCGTGTGTAGGCGGCCATGTAAGTTGG  
ATGTGAAAGCCCCGGGCTCAACCCGGGAAGTGCATTCAAACTGCGTGGCTTGAGTACTG  
GAGAGGTTGGTAGAATTCTCGGTGTAGAGGTGAAATTCGTAGATATCGAGAGGAATACCG  
GTGGCGAAGGCGGCCAACTGGACAGATACTGACGCTGAGACACGAAAGCGTGGGGAGCAA  
ACAGGATTAGAAACCCGAGTAGTCC

>Otu18018

CCAGCCTATGGGTGCTCCAGTAAGGAATATTGGTCAATGGAGGCAACTCTGAACCAGCC  
ATGCCGCGTGAGGAAGACGGCCCTATGGGTTGTAACTGCTTTTGTACCAGAGAAAACC  
CGAGTACGTGTACTCGGTTGATAGTACGGTAAGAATAAGCATCGGCTAACTTCGTGCCAG  
CAGCCGCGGTAATACGAAGGATGCAAGCGTTATCCGGATTTATTGGGTTTAAAGGGTGCG  
TAGGCGGACTTATAAGTCAGTGGTGAAATCTCGATGCTTAACATCGAACGTGCCATTGAT  
ACTGTAGGTCTTGAGTACAGATGCCGTTGGCGGAATGTGTCTATGTAGCGGTGAAATGCTT  
AGATATTACACAGAACACCAATTGCGAAGGCAGCTTACTAAAGTGTAAGTACGCTGAGG  
CACGAAAGCGTGGGGATCAAACAGGATTAGAAACCCCCGTAGTCC

>Otu18025

CCAGCCTACGGGACGCAGCAGTGGGGAATTTTGCGCAATGGACGAAAGTCTGACGCAGCA  
ACGCCGCGTGGGTGATGAAGGTCTTCGGACTGTAAACCCTGTCGCCAGGGACGAAGGTG  
CCTACGTTAATAGCGTGGGTGCTTGACGGTACCTGGAGAGGAAGCCCCGGCTAACTCTGT  
GCCAGCAGCCGCGTAATACAGAGGGGGCAAGCGTTATTCGGAATTATTGGGCGTAAAGG  
GCGCGTAGGCGGTTTTTTAAGTCAGATGTGTAATCCCCGAGCTCAACTTGGGAACTGCAT  
CTGAGACTGGAAGGCTAGAGTACTGGAGAGGGAGGTGGAATTCCTGGTGTAGTGGTGAAA  
TGCGTAGATATCGGGAGGAACACCAAGTGGCGAAAGCGGCCTCCTGGACTGTTTCTGACAC  
TCATATGCGAAAGCTAGGGTAGCAAACGGGATTAGAGACCCGCGTAGTCC

>Otu18042

CCAGCCTATGGGAGGCAGCAGTGGGGAATCTTGCACAATGGGGGAAACCCTGATGCAGCG  
ACGCCGCGTGAGCGATGAAGCCCTTCGGGGTGTAAGCTCTTTTCGGCAGGGAAGATAGTG  
ACGGTACCTGCAGAAGCAGCTGCGGCTAACTACGTGCCAGCAGCCGCGGTAATACAGAGG  
GGGCGAGCGTTGTTTCGGAATTATTGGGCGTAAAGGGCGCGTAGGCGGTGTTGTAAGTCAC  
CTGTGAAACCTCTGGGCTTAACTCAGAGCCTGCAGGCGAAACTGCAATGCTGGAGGGTGG  
GAGAGGTGAGTGGAATTCCTGGTGTAGCGGTGAAATGCGTAGATATCGGGAGGAACACCT  
GTGGCGAAAGCGGCTCACTGGACCATTACTGACGCTGATGCACGAAAGCTAGGGGAGCAA  
ACAGGATTAGAAACCCCTGTAGTCC

>Otu18061

CCAGCCTATGGGGCGCAGCAGAGGAGGATCATCGTCAATGGGCGAAAGCCTGAACGTGCG  
ACGCCGCGTGGGGGATGAAGGCCTTCGGGTGCTAAACCCTGTCAGGAGCTTCGAATGTG  
CGGTGCGGCAATAACCGGCCGTATTGACCAGCTCCAGAGGAAGGGACGGCTAACTTCGTG  
CCAGCAGCAGCGGTAATACGAGGTCCCTAGCGTTGTTTCGGAATTACTGGGCGTAAAGGG  
CGTCTAGGCGGGATGGCAAGTCGAGTATGAAATGCTCTGGCTCAACTAGAGAACCGTGCC  
CGAAACTGCCGTCCTTGAGTGCATCAGAGGAGAGTGGAACCTCTTGGTGGAGCGGTGAAAT  
GCGTAGATATCAAGAGGAACGCCGGAGGCGAAAGCGATTCTCTGGGATGCTACTGACGCT  
GAAGCGCGAAAGCTAGGGGAGCAAACGGGATTAGAAACCCTAGTAGTCC

>Otu18070

CCAGCCTACGGGTTGCTCCAGTCGCGAATTTTTCTCAATGGACGCAAGTCTGAAGAAGCC  
ATGCCGCGTGCGGGACGAAGGCCCTCTGGGTTGTAAACCGCTGTCAGGGAAGGGGAAACG  
TACGGTGTTAACAGCGCCGTATTTGACTGCTTTCCAAAGGAAGCACCGGCAAAACATGTG  
CCAGCAGCCGCGGTAATACATGTGGTGCAAGCGTTGTTTCGGAATTACTGGGCATAAAGGG  
TGCGTAGGCGGCGTCTGAGTCTGGGGTGAAACCCTGCGGCCTAACCGTGGGACTGCCTC  
GGATACTGCGATGCTTGAGTGCGTGAGGGGTGATCGGAACGCGTGGTGTAGCGGTGAAAT  
GCGTAGATATCACGCGGAAGGCCAACGGCGAAGGCAGATCACTGGTGCGCAACTGACGCT  
GAGTGCACGAAAGCGTGGGGAGCAAACAGGATTAGATACCCAGTAGTCC

>Otu18074

CCAGCCTATGGGGGGCACCAAGTCGAGAATATTCGACAATGGGCGAAAGCCTGATCGAGCG  
ACGCCGCGTGAGGATGAAGGTCTTCGGATCGTAAACTGCTTTTATGTTTTAGAAAGTAA  
TTGATCGAAACATGAATAAGGAGCTGCAAACTTCGTGCCAGCAGCCGCGGTAATACGAAG

GCTCCAAGCGTTATCCGGATTTATTGGGCGTAAAGGGCGCGTAGGGGGTTTCATGTGTTT  
CCGGTTAAAGACCAGGGCTTAACTCTGGCAGCGCCGGGAAAACCTGTGAACTTGAGGGTG  
TTAGAGGTCTGTAGAACGCACGGTGTAGGGGTGAAATCCGTTGATATCGTGCGGAATACC  
AAAGGCGAAGGCAGCAGACTGGGACATTCTGACCCTGAGGCGCGAAAGCGTGGGGAGCA  
AAAAGGATTAGAGACCCCCGTAGTCC

>Otu18096

CCAGCCTATGGGTCGCTGCAGTCGAGAATCTTCCACAATGGACGAAAGTCTGATGGAGCG  
ACGCCGCGTGCAGGATGAAGTTCTTCGGGATGTAAACTGCTTTTATGAGATAGAAAGTTT  
ATTGATCGTCTCATGAATAAGAGGTTGCTAAACTCGTGCCAGCAGCAGCGGTAATACGAG  
TGCTTCGAGCGTTATCCGGAATCATTGGGCGTAAAGGGTGTGTAGGTGGTCGCGTTAGTC  
TCTTGTGAAAGCTCTCCGGCTCAACCGGGGAAACGCAGGGGAAACGGCGCGACTTGAGGA  
TGCGAGAGGAGAGTGGAATCATAGTGTAGCGGTGAAATGCGTTGATATTATGGGGAACA  
CCAAAAGCGAAGGCAGCTCTCTGGAGCACTCCTGACACTGAAACACGAAAGCGTGGGTAG  
CGAATGGGATTAGAAACCCAGTAGTCC

>Otu18101

CCAGCCTATGGGAGGCAGCAGTCGAGAATTTTTCTCAATGGGGGAAACCCTGAAGGAGCG  
ACGCCGCGTGGAGGATGAAGTTTTTCGGATTGTAAACTCCTGTCATTTCGGGAACAAGTGT  
GCGGATTTAACTGATCCGTACTTGATAGTACCGGAAGAGGAAGAGACGGCTAACTCTGTG  
CCAGCAGCCGCGGTAATACAGAGGTCTCAAGCGTTGTTTCGGATTTCATTGGGCGTAAAGGG  
TGCGTAGGTGGTAGGGTAAGTTGGATGTGAAATCCCGGAGCTTAACTCCGGAACCTGCATT  
CAATACTGCCTTGCTGGAGTACTGGAGAGGAGATTGGAATTCACGGTGTAGCAGTGAAAT  
GCGTAGATATCGTGAGGAAGACCAGTGGCGAAGGCGAATCTCTGGACAGTTACTGACACT  
GAGGCACGAAGGCCAGGGGAGCAAACGGGATTAGAGACCCCTGTAGTCC

>Otu18103

CAGCCTACGGGGCGCAGCAGTGAGGAATATTGCTCAATGGCCGCAAGGCTGAAGCAGCAA  
CGCCGCGTGAGGGATGAAGGTTCTATGAATCGTAAACCTCTGTAGAAAGGGAGAAATAGT  
CACCTATGGTGATTTGATAGTACCTTTAAAGTAAGCCCCGGCTAACTACGTGCCAGCAGC  
CGCGGTAATACGTAGGGGGCAAGCGTTGTCCGGAATCACTGGGTGTAAAGGGTGCTCAGG  
CGGATTTGTAAAGTCAGAGGTGAAACTCTGCAGCTTAACTGCAGAACTGCCTTTGATACTG  
CAATTCTAGAGTTCGGGAGAGGGTGATGGAATTCATGGTGTAGCGGTGAAATGCGTAGAT  
ATCATGAAGAACACCAGTTGCGAAGGCGGTACCTGGCCCGATACTGACGCTCAAGCACG  
AAAGCGTGGGGAGCAAACAGGATTAGATACCCCGGTAGTCC

>Otu18106

CCAGCCTACGGGTCGCTGCAGTGGGGAATTTTCCGCAATGGGCGAAAGCCTGACGGAGCA  
ATACCGCGTGAGGGAGGAAGGCCTTTGGGTGTAAACCTCTTTTCTCAAGGAAGATAATG  
ACGGTACTTGAGGAATCAGCATCGGCTAACTCCGTGCCAGCAGCCGCGGTAAGACGGAGG  
ATGCAAGCGTTATCCGGAATTATTGGGCGTAAAGCGTCCGCAGGTGGCGATTCAAGTCTG  
TTGTCAAAGCGCAGGGCTTAACTCTGTACAGGCAATGGAACTGAGTTGCTTGAGTATGG  
TAGGGGTAGAGGGAATTCCCGGTGTAGCGGTGAAATGCGTAGATATCGGGAAGAACACCA  
GTGGCGAAAGCGCTCTACTGGGCCAAGACTGACACTGAGGGACGAAAGCTAGGGGAGCGA  
AAGGGATTAGAAACCCAGTAGTCC

>Otu18108

CCAGCCTACGGGTGGCACCAGTGGGGAATCTTGCGCAATGGACGAAAGTCTGACGCAGCC  
ACGCCGCGTGAGTGAAGAAGGCCTTCGGGTGTAAAGCTCTGTGCGGGGGGACAAAACC  
TCTAAGGTTAATAGCCTTAGAGCTTGATGGTACCCTTAAAGGAAGCACCGGCTAACTTCG  
TGCCAGCAGCCGCGGTAATACGAAGGGTGCAAGCGTTGCTCGGAATTATTGGGCGTAAAG  
GGTAGGTAGGTGGTGACATTTGTCTGAGGTGAAATCCCTGAGCTTAACTCAGGAAGTGCC  
TTGGAACGGTGTCACTAGAGTGCTGGAGAGGTTTCGCAGAAATCTTGGTGTAGCGGTGAA  
ATGCGTAGAGATCAAGAGGAATACCAGAGGCGAAGGCGGCGAACTGGACAGTTACTGACA  
CTGAACTACGAAAGCGTGGGGAGCAAACAGGATTAGAAACCCCGTAGTCC

>Otu18110

CCAGCCTATGGGGGGCTGCAGTGGGGAATATTGGACAATGAGCGAAAGCTTGATCCAACCT  
ATATCACAAGAGAGATGAAGAATTTTTGATTTGTAAATCTTGATAGCTAATGAACATAAT  
GAGAATAATTGGCGTATTAGTCTGGCTAACTTCGTGCCAGCAGCTGCGGTAATACGGAG  
GGGACAAGTGTTACTCATAGTAATTGGGTGTAAAGGGTATGTAGGCGGTTTATTAAGTTC  
TTGATGAAATATTTTTAAGGTAAAAATGTATGATAGAAAACCTAGTAGACTAGAGTTTAAA  
ATGGGAGCGCAGTATTATAAATGCAGGGGTAAAATCCATTAAAATATTTATAAGACTAAC  
AAAAGCGAAGGCGCAATCTGGTTTTAACTGACGCTGAGGTACGAAAGCGTGGGGATCAA

ACAGGATTAGAGACCCTAGTAGTCC

>Otu18120

CCAGCCTACGGGTCGCTGCAGTGGGGAATTTTGCGCAATGGGGGAAACCCTGACGCAGCA  
ACGCCGCGTGAGGATGAAGCTCCTTGGAGTGTAAGCTCCTTTTCGACCGGGAAAATTATG  
ACGGTACCGGATGAAGAAGCACCGGCTAACTCTGTGCCAGCAGCCGCGTAATACAGAGG  
GTGCAAGCGTTGTTCCGAATTATTGGGCGTAAAGGGTGCCTAGGCGGTGCGGTAAGTCTT  
TTGTGAAATCTCCAGGCTCAACCTGGAGCCTGCAAGGGAACTGCCGTGCTTGAGTGTGG  
GAGAGGTGAGTGGAATTCCCGGTGTAGCGGTGAAATGCGTAGATATCGGGAGGAACACCT  
GTGGCGAAAGCGGCTCACTGGACCACAACCTGACGCTGATGCACGAAAGCTAGGGGAGCAA  
ACAGGATTAGATACCCGTGTAGTCC

>Otu18148

CCAGCCTACGGGTTGCAGCAGTCGAGAATCTTCCACAATGGACGAAAGTCTGATGGAGCG  
ACGCCGCGTGATTGATGAAGACCCTCTGGGTCGTAAAAATCTTTTATGAGCTACTAAGTT  
TATTGAAGAGCTCATGAATAAGGGGTTGCTAAACTCGTGCCAGCAGCAGCGGTAATACGA  
GTGCCCCGAGCGTTATCCGGAATCATTGGGCGTAAAGGGTGTGTAGGTGGTCGTGTAGT  
CAATCGTTAAACCACGGGCTTAACCTGTGGCCGGCGACTGAAACGGGCACGACTGGAGGG  
TGCGAGGGGTGAATGGAATCATGGAGTAGGGGTGAAATCCGTTGATATCATGGGGAAACA  
CCAAAAGCGAAGGCAGTTCACTGGCGCATTCCTGACACTGAAACACGAAAGCGTGGGTAG  
CGAATGGGATTAGAGACCCTTGTAGTCC

>Otu18172

CCAGCCTATGGGTCGCAGCAGTAGGGAATATTGCGCAATGGGCGAAAGCCTGACGCAGCA  
ATTCCGCGTGAGGACGAGGGTTTTTCGGATCGTAAACTCCTTTTCGGTGGTGACGATTATG  
ACGGTAGCCACAGAAGAAGCACCGGCTAACTACGTGCCAGCAGCCGCGGTAAGACGTAGG  
GTGCAAGCGTTGTCCGAATTATTGGGCGTAAAGAGTTTCGTAGGCGGTTTGTCAAGTCTG  
ACGTTAAAGGCCTGAGCTTAACTCGGGTATGGCATCGGAAACTGACAGGCTGGAGTGTGG  
TAGAGGCAAGGGGAATTCCTGGTGTAGCGGTGAAATGCGTAGATATCGGGAGGAACACCA  
GTGGCGAAAGCGCCTTGCTGGGCCATTACTGACGCTGAGGAACGAAAGCCAGGGGAGCGA  
AAGGGATTAGAAACCCCAAGTAGTCC

>Otu18178

CCAGCCTACGGGATGCTGCAGTGGGGAATATTGGACAATGGGGGAAACCCTGATCCAGCG  
ACGCCGCGTGCTGAAGAAGGCCTGCGGGTTGTGAAGCACTTTTAGTGGGGACAAAAGC  
CATGGACTAATATTCTGTGGTCTTGATTTAACCCTAAAGAAAAAGCACCGGCTAACTCTGT  
GCCAGCAGCCGCGGTAATACAGAGGGTGCGAGCGTTAATCGGAATTACTGGGCGTAAAGC  
GCGCGTAGACGTTTTGTAAAGTCAGATGTGAAATCCCTGGGCTCAACCTGGGAACTGCAT  
TTGAAACTGCATGGCTAGAGTATCGAAGAGGGAAGTGAATTTCCGGTGTAGCGGTGAAA  
TGCGTAGATATCGGGAGGAACACCTATGGCGAAAGCACCTGCCTGGGCTTCTATTGACGC  
TAAGACTCGAAAGCTGGGGGAGCAAACAGGATTAGAGACCCTAGTAGTCC

>Otu18183

CCAGCCTATGGGGTGCTGCAGTAAGGAATATTGGTCAATGGGCGGAAGCCTGAACCAGCC  
ATGCCGCGTGAGGAAGACGGCCCTACGGGTTGTAAACTGCTTTTGCAGGGGAATAAAACC  
CTCGTATGTATACGAGGCTGAATGTACTCTGAGAATAAGGATCGGCTAACTCCGTGCCAG  
CAGCCGCGGTAATACGAGGATCCAAGCGTTATCCGGATTTATTGGGTTTAAAGGGTGC  
TAGGTGGGCAGGTAAGTCAGTGGTGAAATCTCTGGGCTTAACCCAGAACTGCCGTTGAT  
ACTATCTGTCTTGAATGTAGTGGAGGTGAGCGGAATATGTCATGTAGCGGTGAAATGCTT  
AGATATGACATAGAACATCTATTGCGAAGGCAGCTCGCTACACTATAATTGACACTGAGG  
CACGAAAGCGTGGGGATCAGACAGGATTAGATACCCTTGTAGTCC

>Otu18191

CCAGCCTATGGGTGGCTCCAGTGGGGAATATTGCGCAATGGGCGAAAGCCTGACGCAGCA  
ACGCCGCGTGAGTGAGGAAGGCCTTAGGGTTGTAAAGCTCTTTCGGCCGGGAAGAAGGGA  
ACTACTATTAATAAGAGTAGTTTTTGTATGGTACCGGAAGAAGAAGCACCGGCAAACCTCG  
TGCCAGCGGCCGCGGTAATACGAAGGGTGCAGCGTTATTCCGATTTATTGGGCGTAAAG  
GGTTCGTAGGCGGGAATTCAAGTCAAGTGTGAAATGTCCAGGCTTAACCTGGAGAGTGCA  
TTTGAAACTGTTTTTCTTGAGTGTTGAAGAGGGTGGTGGAATTGCTGGTGTAGGAGTGAC  
ATCCGTAGAGATCAGCAGGAACACCGGAGGCGAAGGCGGCCACCTGGTCAATCACTGACG  
CTGAGGAACGAAAGCGTGGGGAGCAAACAGGATTAGAAACCCCTGTAGTCC

>Otu18194

CCAGCCTACGGGGGGCACCAAGTGGGGAATTTTGTGCAATGGGGGAAACCCTGACACAGTG  
ACACCGCGTGAACGAAGAAGCCCTTTGGGGTGTAAGTTCTGTGCGCTGGAACGAAAAAA

ATGACGGTACCAGCAAAGGAAGCATCGGCTAACTACGTGCCAGCAGCCGCGGTAAGACGT  
AGGATGCAAGCGTTGCCCGGATTTATTGGGCGTAAAGAGTTCGTAGGCGGTTTACTAAGT  
CTGATGTTAAAGATCGGGGCTCAACCCTGGGAGTGCATTGGATACTGGTAGGCTTGAGTG  
TGGTAGAGGCTAGTGGGAATCCCAGTGTAGCGGTGAAATGCGTAGATATTGGGAAGAACA  
CCGGTGGCGAAGGCGGCAACCTGGTCTTCTACTGACGCTGAGGCGCGAAAGCGTGGGGAG  
CAAACAGGATTAAATACCCTCGTAGTCC

>Otu18201

CCAGCCTACGGGGTGCACCAGTGGGGAATTTTGCGCAATGGGGGAAACCCTGACGCAGCA  
ACGCCGCGTGGAGGATGAAGTATCTCGGTACGTAACTCCTTTTCGATGGGGAAGATAATG  
ACGGTACCCATAGAAGAAGCCCCGGCTAACTTCGTGCCAGCAGCCGCGGTAATACGAAGG  
GGGCTAGCGTTGTTTCGAATCACTGGGCGTAAAGCGCACGTAGGCGGATCTTTAAGTCAG  
AGGTGAAATCCCAAGGCTCAACCTTGAACTGCCTTTGATACTGGGGATCTCGAGTCCGG  
GAGAGGTGAGTGGAATTGCGAGTGTAGAGGTGAAATTCGTAGATATTTCGAAGAACACCA  
GTGGCGAAGGCGGCTCACTGGCCCGGAACTGACGCTGAGACGCGAAAGCGTGGGGAGCAA  
ACAGGATTAGAAACCCCCGTAGTCC

>Otu18205

CTAGCCTATGGGGGGCAGCAGTCGAGAATCATTCGCAATGGGCGCAAGCCTGACGATGCG  
ACGCCGTGTGTATGATGAAGGCCTTCGGGTGTAAAGTACTTTTCGCCTTGAACAAGAGA  
AGTTGGCTAACATCCAACAGATTTGAGGGTACAAGGTAAAGAAGCACCGGCTAACTCCGT  
GCCAGCAGCTGCGGTAATACGGAGGGTGCAAGCATTAAATCGGATTTATTGGGCGTAAAGG  
GCGCGTAGGCGGGAATGTAAGTCAGATGTGAAATCCCGGGGCTCAACCCCGGAACAGCAT  
TTGAAACTGCGTTTCTAGAGGGTAGTCGGAGAAAACAGAATTCACAAAGTAGCGGTGAAA  
TGCGTAGATATGTGGAAGAATACCGGTGGCGAAGGCGGTTTTCTAGATTATACCTGACGC  
TGAGGCGCGAAAGCAAGGGGATCAAACAGGATTAGAAACCCCTGTAGTCC

>Otu18209

CCAGCCTATGGGTCGCAGCAGTCGAGAATTTTTTCACAATGGGCGAAAGCCTGATGGAGCG  
ACGCCGCGTGGGGGATGAATGGCTTCGGCCCGTAAACCCCTGTCATTTGCGAACAAACCT  
ATTCACCTAACACGTGAAGAGCTGATTGTAACGGAAGAGGAAGGGACGGCTAACTCTGTG  
CCAGCAGCCGCGGTAATACAGAGGTCTCAAGCGTTGTTTCGGATTTCATTGGGCGTAAAGGG  
TGCGTAGGCGGCGAAGCAAGTCAGATGTGAAATCCCGGGGCTCAACCCCGGAGCTGCATT  
TGATACTGCTTTGCTTGAGGACTGGAGAGGAGATCGGAATTCACGGTGTAGCAGTGAAAT  
GCGTAGATATCGTAAGGAAGACCAGTGGCGAAGGCGGATCTCTGGACAGTTACTGACACT  
GAGGCACGAAGGCCAGGGGAGCAAACGGGATTAGAGACCCTAGTAGTCC

>Otu18219

CCAGCCTATGGGGGGCTGCAGTCGAGAATTTTTCTCAATGGGTGAAAGCCTGAACCAGCC  
ACGCCGCGTGCAGGAAGACGGCCCTACGGGTGTAAACTGCTTTTGCAGGGGAATAAACC  
CCGGTATGTATACCGGGTTGAATGTACCTTGAGAATAAGGATCGGCTAACTCCGTGCCAG  
CAGCCGCGGTAATACGGAGGATCCGAGCGTTATCCGGATTTATTGGGTTTAAAGGGTGCG  
TAGGCGGCCTTGTAAGTCAGGGGTGAAAGACGGTAGCTCAACTATCGCAGTGCCTTTGAT  
ACTGCAGGACTTGAATGTACTAGAGGTAGGCGGAATGTGACAAGTAGCGGTGAAATGCAT  
AGATATGTACAGAACACCAATTGCGAAGGCAGCTTACTATGGTATGATTGACGCTGAGG  
CACGAAAGCGTGGGGATCAAACAGGATTAGAAACCCGCGTAGTCC

>Otu18230

CCAGCCTATGGGTTGCAGCAGTCGAGAATTTTTCTCAATGGGCGAAAGCCTGAAGGAGCG  
ACGCCGCGTGGGGGATGAATGTCTTCGGATTGTAAACTTCTGTCATTAGGGAACAAGTGC  
CGGCACGTAACCTGCTGCCGGCTTGATAGTACCTGAAGAGGAAGAGACGGCTAACTCTGTG  
CCAGCAGCCGCGGTAATACAGAGGTCTCAAGCGTTGTTTCGGATTTCATTGGGCGTAAAGGG  
TGCGTAGGTGGTGTCTGAAGTCGGGTGTGAAATCTCGGGGCTTAACCCCGAAACTGCATT  
CGATACTGCGGTGCTCGAGGACTGGAGAGGAGACTGGAATTCACGGTGTAGCAGTGAAAT  
GCGTAGATATCGTGAGGAAGGCCAGTGGCGAAGGCGGGTCTCTGGACAGTTCCTGACACT  
GAGGCACGAAGGCCAGGGGAGCAAACGGGATTAGAAACCCAGTAGTCC

>Otu18241

CCAGCCTATGGGGGGCTCCAGTGAGGAATATTGGTCAATGGGCGAGAGCCTGAACCAGCC  
ATCCCGCGTGCAGGAAGACGGCCCTATGGGTTGTAAACTGCTTTTTCGCATGAAGAACAT  
CCCGAACGCGTTCGGGACTGACGGTAATGCGTGAATAAGCACCGGCTAACTCCGTGCCAG  
CAGCCGCGGTGATACGGAGGGTGCAAGCGTTATCCGGATTTATTGGGTTTAAAGGGTGCG  
TAGGCGGTTATATAAGTCAGTGGTGAAATCCTGCAGCTCAACTGTAGAACAGCCATTGAA  
ACTGTGTGACTTGAGTAATCTTGAGGTAGGCGGAATGTGTAGTGTAGCGGTGAAATGCTT

AGATATTACACAGAACACCGATTGCGAAGGCAGCTTACTGGGCCATTACTGACGCTGATG  
CACGAAAGCGTGGGGAGCGAACAGGATTAGAAACCCCAGTAGTCC  
>Otu18247  
CCAGCTACGGGGTGCAGCAGTTAAGAATCTTGCACAATGGGCGAAAGCCTGATGCAGCGA  
CGCCGCGTGAATGATGAAGGCCTTCGGGTGTAAAGTTCAATAAGCAGGGAAGAATAAGT  
GGGTCTAATACGCCTCATGATGACGGTACCTGTCTAAAGCCTCGGCTAACTACGTGCCA  
GCAGCCGCGGTAAACACGTATGAGGCGAGCGTTGTTCCGAATTATTGGGCGTAAAGCGCGT  
GTAGGCGGGGAATTAAGTTAGGTGTGAAATCCACGGGCTCAACCCGTGAATTGCACCTAA  
TACTGATTCTCTTGAGTTCGGGAGAGGAGAGCGGAATTTCCGGTGTAGCGGTGAAATGCG  
TAGATATCGGAAAGAACACCAGTGGCGAAGGCGGCTCTCTGGCCTAGAACTGACGCTGAG  
ACGCGAAAGCGTGGGGAGCGAACGGGATTAGAAACCCCTCGTAGTCC  
>Otu18256  
CCAGCCTATGGGATGCTGCAGTGGGGAATCTTGGACAATGGGCGCAAGCCTGATCCAGCA  
ATGCCGCGTGGGTGAAGACGGCCTGCGGGTTGTAAAGCCCTTTTGGCGGGGAAGAAAGCC  
CTGGGTAAACAGACTCAGGGGGTGACGTTACCTGCTGAAGGAGCACCGGCCAACTCCGT  
GTCAGCAGCCGCGTAATACGGAGGGTGCAGCGTTGTTCCGATTTATTGGGCGTAAAGC  
GCGTGTAGGCGGTTTTTTAAGTCTGATGTGAAAGCCCTGGGCTCAACCCGGGAAGTGCAT  
TGAAACTGGGAGACTTGAATACGGGAGAGGGCAGTGGAATTCCTGGTGTAGGAGTGAAA  
TCCGTAGATATCAGGAGGAACACCGGTGGCGAAGGCGGCTGCCTGGACCGATATTGACGC  
TGAGACGCGAAAGCGTGGGGAGCAAACAGGATTAGATAACCCCTGTAGTCC  
>Otu18266  
CAGCCTATGGGGGGCAGCAGTCGAGAATTTTTTCACAATGGGGGGAAACCCCTGATGGAGCG  
ACGCCGCGTGGGGATGAATGGCTTCGGCCCGTAAACCCCTGTCATTTGTGAATAAACCTT  
TTCGCTGAACAAGCGAAAAGCTGATAGTAACGGAAGAGGAAGGGACGGCTAACTCTGTGC  
CAGCAGCCGCGGTAAATACAGAGGTCCCGAGCGTTGTTCCGATTCACTGGGCGTAAAGGT  
GCGTAGGTGGCCGGTAAGTCTGATGTGAAATCTCGGAGCTCAACTCCGAAACGGCATTG  
GATACTATCCGGCTGGAGGGTTCGGAAGGGGGACTGGAATTCCTCGGTGTAGCAGTGAAATG  
CGTAGATATCGAGAGGAACACCAGTGGCGAAGGCGAGTCCCTGGACGACTCCTGACACTG  
AGGCACGAAAGCTAGGGGAGCAAACCGGATTAGAAACCCCTGTAGTCC  
>Otu18272  
CCAGCCTACGGGTCGCTGCAGTCGAGAATCTTCGGCAATGGGCGAAAGCCTGACCGAGCG  
ATGCCGCGTGAGGGATGAAGGCCTTCGGGTGCTAAACCTCTGTCACCCGGGACGAAGAAT  
GTGACGGTACCGGGAGAGGAAGCACCGGCTAACTACGTGCCAGCAGCCGCGGTAAATACGT  
AGGGTGCAGAGCGTTATTTCGGATTTACTGGGCGTAAAGGGTCCGCAGGGGGTTTGCCAAGT  
CCGATGTGAAATACCCCAGCTCAACTGTGGAACGGCATTGGATACTGGCGAACTTGAGTG  
CATGAGGGGTGAGCGGAACCTCCTGGTGTAGCGGTGGAATGCGTAGATATCAGGAAGAACA  
CCGATGGCGAAGGCGGCTCACTGGCATGCAACTGACCCTCAGGGACGAAAGCGTGGGGAG  
CAAACAGGATTAGATAACCCGCGTAGTCC  
>Otu18291  
CCAGCCTACGGGTTGCAGCAGTTAAGAATCTTGCACAATGGGCGCAAGCCTGATGCAGCG  
ACGCCGCGTGCGCGATGAAGGCCTTCGGGTGTAAAGCGCAACAAACAGGGAAGAAGCAA  
GTGACGGTACCTGTCTGAAGCACCGGCTAACTACGTGCCAGCAGCCGCGGTAAATACGTAT  
GGTGCAAGCGTTGTTCCGAATCACTGGGCGTAAAGGGTGCAGGCGGATTGTTAAGTCG  
GGGTGAAACCTGAGGGCTCAACCCCTCAGCCTGCTTTTCGAAACTGGCAGTCTGGAGTCCC  
GGAGAGGCAGGCGGAATTCCTGGTGTAGCGGTGAAATGCACAGATATCGGGAGGAACACC  
AATGGCGAAGGCAGCCTGCTGGACGGAGACTGACGCTCATGCACGAAAGCGTGGGGAGCA  
AACAGGATTAGAAACCCCGTAGTCC  
>Otu18297  
CCAGCCTACGGGTGGCAGCAGTGGGGAATATTGGACAATGGGGGAAACCCCTGAAGGAGCG  
ACGCCGCGTGAGAGATGAAGGTCTTCGGATTGTAAACTCCTGTCATGAGGGAACAAACCC  
GCACGTTTTAACTGATGTGCGGCTGATAGTACCTCAAGAGGAAGAGACGGCTAACTCTGTG  
CCAGCAGCCGCGGTAAATACAGAGGTCTCAAGCGTTGTTCCGATTCAATTGGGCGTAAAGGG  
TGCGTAGGCGGCGAAGCAAGTCAGGTGTGAAATCCCGGGGCTCAACCCCGGAAGTGCATT  
TGATACTGCTTTGCTAGAGTACTGGAGAGGAGATTGGAATTTACGGTGTAGCAGTGAAAT  
GCGTAGATATCGTAAGGAAGACCAGTGGCGAAGGCGAATCTCTGGACAGTTACTGACACT  
GAGGCACGAAGGCCAGGGGAGCAAACGGGATTAGATAACCCCGTAGTCC  
>Otu18300  
CCAGCCTACGGGTTGCACCAGTGGAGAATATTAGTCAATAAACGAAAGTTTGAAGTAGCG

TTTTGCGGAGATGAAAGATTACAGAATCGAGAAGGCTATGACAGCTGTAAAGTCTGTGC  
GTGGGTTAGAAGAATGATTCTACACCTGAAGAGAACCCCGGGCCAACAACGTGCCAGCAG  
CTGCGGTAAGACGTTGACGGGGGAGCGTTACTGGCCGTTACTAGGCGTAAAGAGTGGCTA  
GACTGTTTTAAGAAATTGTACCTAAAATCGTAGAATTGACGGAGGCAGTTACAATACCTTA  
ATACTAGAGATTTGGGGAGGTGGGCGATGAGTATAATCTAGAGATAAAAATTCGGATAGAT  
TATAAGGATATCCTGTAGCCGCGGCGGCTTTCATCCATTATCTGACGTCGAATCACTAA  
AGTACGAGCATCAATCAGGATTAGAAACCCCTGTAGTCC

>Otu18311

CCAGCCTATGGGTTGCAGCAGTCGAGGATCTTCGGCAATGGGCGCAAGCCTGACCGAGCG  
ACGCCGCGTGTGCGATGAAGGCCTTCGGGTGTAAAGCACTGTCGAGGGGGAGAAACGCC  
CGCAAGGGCTTGATCTATCCCTGGAGGAAGCACGGGCTAAGTTCGTGCCAGCAGCCGCGG  
TAAGACGAACCGTGCAACGTTGTTTCGGAATCGCTGGGCTTAAAGGGCGCGTAGGCGGGT  
CATCAAGTCCGGGGTGAAATACTTCGGCCTAACCGGAGAAGGGCTTCGGATACTGGTGAC  
CTCGAGGGGTGTAGGGGCATGTGGAACCTCCGGTGGAGCGGTGAAATGCGTAGATATCGG  
AAGGAACGCCGTGGCGAAAGCGACGTGCTGGACACCTACTGACGCTGATGCACGAAAGC  
GTGGGTAGCAAACAGGATTAGAGACCCTAGTAGTCC

>Otu18317

CCAGCCTACGGGGGGCTCCAGTGGGGAATCTTGCAACAATGGAGGAACTCTGATGCAGCG  
ACGCCGCGTGGAGGAAGAAGGCCTTCGGGTCTGTAAGCTCCTTTTGTGAGGGACGAGGAAG  
GACGGTACCTCACGAATAAGTCACGGCTAACTACGTGCCAGCAGCCGCGGTAAAACGTAG  
GTGGCGAGCGTTATCCGGATTTACTGGGCGTAAAGCGTGTGCAGATGGGTGTGCAAGTGG  
TGTATGAAATCGCTCAGCTTAACTGGGCGGGGTATGCCATACTGCATATCTAGAGAACG  
GGAGAGGGACGTGGAATTCCGGGTGTAGTGGTGAATGCGTAGAGATCCGGAGGAACCCC  
TGAGGCGAAGGCGGCGTCTCGGCCGATTCTGACATTCAGACACGACAGCATGGGGAGCG  
AACGGGATTAGAAACCCTCGTAGTCC

>Otu18320

CCAGCCTACGGGATGCTGCAGTAAGGGATATTGCGCAATGGGCGAAAGCCTGACGCAGCA  
ACGCCGCGTGGAGGAAGAAGGCCTTCAGGTCTGTAAGCTCCTTTTGTGAGGGACGAGGAAG  
GACGGTACCTCACGAATAAGTCACGGCTAACTACGTGCCAGCAGCCGCGGTAAAACGTAG  
GTGGCGAGCGTTATCCGGATTTACTGGGCGTAAAGCGTGTACAGATGGGTGTGCAAGTGG  
TGTATGAAATCGCTCAGCTTAACTGGGCGGGGTATGCCATACTGCATATCTAGAGAACG  
GGAGAGGGACGTGGAATTCCGGGTGTAGTGGTGAATGCGTAGATATCGGAAGGAACACC  
TGTGGCGAAAGCGGCTCACTGGACCATAACTGACGCTGATGCACGAAAGCTAGGGGAGCA  
AACAGGATTAGAAACCCTCGTAGTCC

>Otu18332

CCAGCCTATGGGTCGCTCCAGTGGGGAATATTGGACAATGGGCGCAAGCCTGATCCAGCC  
ATGCCGCGTGGATGATGAAGGCCTTAGGGTTGTAAAATCCTTTTAACGGGGAAGATAATG  
ACGGTACCCGTAGAATAAGCCCCGGCTAACTTCGTGCCAGCAGCCGCGGTAAACGAAGG  
GGGCTAGCGTTGCTCGGAATTACTGGGCGTAAAGCGCACGTAGGCGGACTCTTAAGTCGG  
TGGTGAAAGCCTGGAGCTCAACTCCAGAACTGCCTTCGATACTGGGAGTCTCGAGTCCGG  
GAGAGGTGAGTGGAAGTGCAGTGTAGAGGTGAAATTCGTAGATATTCGCAAGAACACCA  
GTGGCGAAGGCGGCTCACTGGTCCGGAAGTACGCTGAGACGCGAAAGCGTGGGGAGCAA  
ACAGGATTAGATACCCCCGTAGTCC

>Otu18337

CCAGCCTACGGGACGCACCAGTAGGGAATATTGGGCAATGGGCGAAAGCCTGACCCAGCA  
ACGCCGCGTGCACGATGAAGGTCTTCGGATCGTAAAGTGCTTTTCTGAGAGATGAGAAAG  
GACAGTATCTCAGGAATAAGTCTCGGCTAACTACGTGCCAGCAGCCGCGGTAAACAGTAG  
GAGGCAAGCGTTATCCGGATTTACTGGGCGTAAAGCGCATGCAGGTGGTTCGGTAAGTTG  
GATGTGAAAGCTCCTGGCTCAACTGGGAGAGGTTCGTTCAATACTACCGGACTTGAGAGCA  
GTAGAGGGAGGTGGAATTCCCGGTGTAGAGGTGAAATTCGTAGATATTCGGGAGGAACACC  
GGCGGCGAAGGCGGCGAACTGGTTCGAGACTGACGCTGAGGCGCGAAAGCGTGGGGAGCA  
AACAGGATTAGAAACCCTCGTAGTCC

>Otu18339

CCAGCCTACGGGGTGGCTGCAGTCGAGAATCATTTCGCAATGGGCGAAAGCCTGACGATGC  
GACGCCGCTGTGAGCGATGAAGGCCTTTGGGTCGTAAAGCTCTTTCGCTTGGGAACAAGAG  
AGGATGGCTAATATCCATCTAATTTGAGGGTACCGAGTAAAGAAGCACCGGCTAACTACG  
CGCCAGCAGCTGCGGTAATACGTAGGGTGCAAGCATTAATCGGATTTATTGGGCGTAAAG  
GACGCGTAGGCTGATTTTTAAGTCGAATGTGAAATTCGGGGCTTAACCCCGGAGCTGCA

TTCGAAACTGGAGATCTAGAGGATAGAAGGAGAAAACGGAATTCACAAAGTAGCGGTGAA  
ATGCGTAGATATGTGGAAGAACACCTGTGGCGAAGGCGGTTTTCTATTTTATTCCTGACG  
CTGAGGCGTGAAAGCAAGGGGATCAAACAGGATTAGAAACCCTTGTAGTCC

>Otu18352

CCAGCCTATGGGGGGCAGCAGTGGGGAATTTTGC GCAATGGGCGAAAGCCTGACGCAGCA  
ACGCCGCGTGAGTGATGAAGGCTTTCGGGTCGTAAAGCTCTGTTCGAGGGGAAAGAAATGT  
ATTTGGGTTAATACCCTGGATACTTGACGGTACCCCTAAAGGAAGCACCGGCTAACTCCG  
TGCCAGCAGCCGCGGTAATACGGGGGGTGCAAGCGTTGTTTCGGAATTATTGGGCGTAAAG  
CGCGTGTAGGCGGTTTGTAAAGTCTGTTGTGAAAGCCCTGGGCTCAACCCAGGAAGTGCA  
CTGGATACTGGCAGACTTGAATACGGGAGAGGGTAGTGGAATTCCTGGTGTAGGAGTGAA  
ATCCGTAGATATCAGGAGGGACACCGGTGGCGAAAGCGGCTTTCTGGACTGTTTCTGACA  
CTCATATGCGAAAGCTAGGGTAGCAAACGGGATTAGAAACCCTAGTAGTCC

>Otu18357

CCAGCCTATGGGTTGCTCCAGCTAAGAATATTTCCGCAATGGACGAAAGTCTGACGGAGCG  
ACGCCGCGTGATGACGAAGGCCGAAAGGTTGTAAAGTCCTTTTGTGGGGAAGAATAAG  
CGTGGGAGGGAATGCCCGCGTGATGACATGAACCGACGAATAAGCCCCGGCTAACTACGT  
GCCAGCAGCCGCGGTAACACGTAGGGGGCGAGCGTTGTTTCGGAATTACTGGGCGTAAAGG  
GCATGTAGGCGGCTCTATAGGCCTGGCGTGAAAGTCACCGGCTCAACCGGTGGATTGCGT  
TGGGAACTGTGGGGCTTGAATCATGGAGAGGGAGCTAGAATTCCTGGTGTAGGGGTGAAA  
TCTGTAGAGATCAGGAAGAATACCAATGGCGAAGGCAAGCTCCTGGCCAATGATTGACGC  
TGAGGTGCGAAAGTGTGGGGATCAAACAGGATTAGAAACCCGCGTAGTCC

>Otu18377

CCAGCCTACGGGGCGCAGCAGTCGAGAATCATTCGCAATGGGCGAAAGCCTGACGATGCG  
GCGCCGTGTGAGCGATGAAGGCCTTAGGGTCGTAAAGCTCTTTCGCTTGGGAACAAGAGA  
AGCCGACGAATAATCGGCAGATTTGAGGGTACCAGGTAAAGAAGCACCGGCTAACTCCGT  
GCCAGCAGCTGCGGTAATACGGAGGGTGCAAGCATTAATCGGATTTATTGGGCGTAAAGG  
GCGCGTAGGCGGGGAAGTAAGTCAGATGTGAAATCCCGGGGCTCAACCTCGGAACAGCAT  
ATGAAACTACATCTCTTGAGGGTAGGCGGAGAAAACGGAATTCACAAAGTAGCGGTGAAA  
TGCGTAGATATGTGGAAGAACACCAAGTGGCGAAGGCGGTTTTCTAGCTTGCTCCTGACGC  
TGAGGCGCGAAAGCAAGGGGATCAAACAGGATTAGAGACCCAGTAGTCC

>Otu18379

CCAGCCTACGGGAGGCAGCAGTGGGGAATATTAGACAATGGGCGAAAGCCTGATCTAGCA  
ATACCTTGTGGGGGAAGAAAATGGTTGTTGTAAACTCCTATTTCAATGATAACAATAATG  
ATTATAATCATAAAGAAGGCCCGGTTAATAACTGTGCCAGCATCCGCGGTAATACAGGT  
GGGTCAAGTATTATTCTACATAATTGGGCGTAAAGGATAAGTAGGTTGTTTTTCAAATAT  
TAATATAAATTCTATATAAAAGTTATAGGAGATTTAATAAATTGTAAACTATGAGTTTA  
TAAAGGATAACAGAATCTACCAAAGTAACAGTAAAATGTTATAAGATTGGAGAGAATACC  
AAATGGCGAAAGCAATTATCTAGCTAAAACCTGACACTGAATTATGAAGGCATGGGTAGCG  
AACAGGATTAGAGACCCCGTAGTCC

>Otu18404

CCAGCCTATGGGTGGCTCCAGTGGGGAATATTGGACAATGGGGGAAACCCTGATCCAGCC  
ATGCCGCGTGCGGGAAGAAGGCCTTCGGGTTGTAAACCGCTTTTGTGAGGGAAGAAAAGC  
TCCGAGCTAATACCCCGGAGTCATGACGGTACCTGAAGAATAAGCACCGGCTAACTACGT  
GTCAGCAGCCGCGGTAATGCGTAGGGTGCAAGCGTTAATCGGAATTACTGGGCGTAAAGC  
GTGCGCAGGCGGCTTTGCAAGACAGATGTGAAATCCCGGGCTTAACCTGGGAACTGCAT  
TTGTGACTGCATGGCTGGAGTGCGGCAGAGGGGATGGAATTCGCGGTGAGCAGTGAAA  
TGCGTAGATATGCGGAGGAACACCGATGGCGAAGGCAATCCCCTGGGCCTGCACTGACGC  
TCATGCACGAAAGCGTGGGGAGCAAACAGGATTAGAAACCCAGTAGTCC

>Otu18411

CCAGCCTATGGGTGGCACCAGCAACGAATCTTCCCCAATGCCGGAACGGTGAGGGAGCG  
ACGCCGCGTGAAAGATGAAGTACTTCGGTATGTAAACTTCTAAAGGGGTATGAAAGCTG  
AGGACCTAATACGTCCGGAGGTTGATCAGACCCTGATAAGGGGCGGCTAACTCTGTGCCA  
GCAGCCGCGGTAAGACAGAGGTCCCGAGCGTTGTTTCGGATTTCATTGGGCGTAAAGGGTGT  
GTAGGAGGCTGGGTAAGTCAGGTGTGAAATCTCATAGCTTAACTGTGAAACTGCGCTTGA  
TACTGCCCGGCTAGAGGATCGGAGGGGGTAACGGAATTTATGGTGTAGTAGTGAAATGCG  
TAGATATCATAAGGAACACCGGTGGCGAAGGCGGTTACCTGGAAGATTCCTGACTCTGAA  
ACACGAAAGCCAGGGGAGCAAACGGGATTAGAAACCCTTG TAGTCC

>Otu18412

CCAGCTACGGGTGGCACCAGTAGGGAATTTTCCACAATGGACGAAAGTCTGATGGAGCAA  
CGCCGCGTGCAGGATGAATGTCTTCGGATTGTAAACTGCTTTTATCTGTGACGAATATGA  
CGGTAGCAGATGAATAAGGACCTGCTAACTACGTGCCAGCAGCCGCGGTCATACGTAGGG  
TCCAAGCGTTATCCGGAATTACTGGGCGTAAAGAGTTGCGTAGGTGGCATAGTAAGTAAG  
TAGTGAAATGATACGGCTCAACCGTATGCCCATTTACTTAAACTGCTACGCTAGAGAATGA  
GAGAGGTTATTGGAATTCCTGTGTAGGAGTGAAATCCGTAGATATAGGGAGGAACACCG  
ATGGCGTAGGCAGATAACTGGCTCATTCTGACACTAAGGCACGAAAGCGTGGGGAGCAA  
ACGGGATTAGATACCCCAGTAGTCC

>Otu18417

CCAGCCTATGGGGCGCTGCAGTGGGGAATATTGGACAATGGGCGCAAGCCTGATCCAGCC  
ATGCCGCGTGAGTGATGAAGGCCTTAGGGTTGTAAAGCTCTTTCGCACGTGACGATAATG  
ACGGTAGCGTGAGAAGAAGCCCCGGCTAACTTCGTGCCAGCAGCCGCGGTAATACGAAGG  
GGGCTAGCGTTGTTTCGGAATCACTGGGCGTAAAGCGCACGTAGGCGGATTTTTAAGTCAG  
GGGTGAAATCCCAAGGCTCAACCTTGAACTGCCTTTGATACTGGAGATCTTGAGTCCGG  
GAGAGGTGAGTGGAAGTGCAGGTGTAGAGGTGAAATTCGTAGATATTCGCAAGAACACCA  
GTGGCGAAGGCGGCTCACTGGCACGGTACTGACGCTGAGGTGCGAAAGCGTGGGGAGCAA  
ACAGGATTAGAGACCCCCGTAGTCC

>Otu18420

CCAGCCTACGGGAGGCAGCAGTGGGGAATATTGGGCAATGGGGGCAACCCTGACCCAGCC  
ATGCCGCGTGAGTGATGAAGGCCTTCGGGTCGTAAAGCTCTGTGGGGAGGGAAGAATCAG  
TCTATGGCTAACATCCATGGACCTTGACGGTACCTCCTTAGCAAGCACCGGCTAACTCCG  
TGCCAGCAGCCGCGGTAATACGGAGGGTGCAAACGTTGCTCGGAATCATTGGGCGTAAAG  
CGCACGTAGGCGGCCTGTAAAGTCGGGTGTGAAAGCCCTGGGCTCAACCCAGGAAGTGCA  
CTCGAAACTGGCAGGCTTGAATATGGAGGAGGGTCGCGGAATTCCCAGGTGTAGAGGTGAA  
ATTCGTAGATATCGGGAGGAACACCAAGTGGCGAAGGCGGCGACCTGGGCCAATATTGACG  
CTGAGGTGCGAAAGCGTGGGGAGCAAACAGGATTAGATACCCCAGTAGTCC

>Otu18430

CCAGCCTACGGGGGGCACCAGTAAGGAATATTGGTCAATGGGCGCAAGCCTGAACCAGCC  
ATGCCGCGTGAGGAAGACGGCCCTACGGGTTGTAAACTGCTTTTGCAGGGGAATAAACC  
CCACTACGTGTAGTGGGTTGAATGTACTCTGAGAATAAGGATCGGCTAACTCCGTGCCAG  
CAGCCGCGGTAATACGGAGGATCCGAGCGTTATCCGGATTTATTGGGTTTAAAGGGTGCG  
TAGGCGGCCCTGTAAGTCAGTGGTGAAATACGGCAGCTCAACTGTGAGGTGCCATTGAT  
ACTGCAGGGCTTGAGTACAGACGAGGTAGGCGGAATTGACGGTGTAGCGGTGAAATGCTT  
AGATATCGTCAAGAACACCGATAGCGAAGGCAGCTTACTAGGCTGTAACTGACGCTGAGG  
CACGAAAGTGTGGGGATCAAACAGGATTAGAGACCCTGGTAGTCC

>Otu18431

CCAGCCTATGGGTTGCAGCAGTGGGGAATCTTGACAATGGGCGAAAGCCTGATGCAGCA  
ACGCCGCGTGGGGGATGAAGCTTTTCGGAGTGTAACCCCTTTTCGACCCGGAAGAAAGCC  
CGCAAGGGTTTGACGGTACGGGTATAAGAAGCCCCGGCTAACTACGTGCCAGCAGCCGCG  
GTAATACGTAGGGGGCTAGCGTTGTTTCGGAATTACTGGGCGTAAAGCGCACGCAGGCGGC  
TCGATAAATTAGAAGTGAAAGCCCCGGGCTTAACCTGGGAATTGCTTTTAAGACTGTGCA  
GCTAGAATCCAGAAGAGGGTAGTGGAATTCGAGTGATAGAGGTGAAATTCGTAGATATTC  
GGAAGAACACCAAGTGGCGAAGGCGACTACCTGGTCTGGCATTGACGCTCATGTGCGAAAG  
CGTGGGGAGCAAACAGGATTAGATACCCCCGTAGTCC

>Otu18434

CCAGCCTACGGGATGCTGCAGTCGAGAATTTTTCTCAATGGGGGAAACCCTGAAGGAGCG  
ACGCCGCGTGAGGATGAAGGCTTTTCGGATTGTAAACTCCTGTCACTGCAGAACAAGGTA  
ACGCCAGTTAACAGCCGCGCTTATTGATGGTATGCGGAGAGGAAGGGACGGCTAACTCTG  
TGCCAGCAGCCGCGGTAAGACAGAGGTCCCGAGCGTTGTTTCGGATTCATTGGGCGTAAAG  
GGTGTGTAGGAGGTCGGGTTAGTCAGGTGTGAAATCTCGGAGCTTAACTCTGAAACTGCG  
CTTGATACTGCTCGGCTAGAGGATCGGAGGGGGTACTGGAATATATGGTGTAGCAGTGAA  
ATGCGTAGATATCATATGGAACACCGGTGGCGTAGGCGGGTACCTGGAAGATTCTGACT  
CTGAAACACGAAAGCTAGGGGAGCAAACGGGATTAGAGACCCTTGTAGTCC

>Otu18444

CCAGCCTATGGGAGGCTGCAGTGGGGAATATTGGACAATGGGCGAAAGCCTGATCCAGCC  
ATGCCGCGTGAGTGATGAAGGCCTTAGGGTTGTAAAGCTCTTTTGTGCGGGAAGATAATG  
ACGGTACCGCAAGAATAAGCCCCGGCTAACTTCGTGCCAGCAGCCGCGGTAATACGAAGG  
GGGCTAGCGTTGCTCGGAATCACTGGGCGTAAAGGGTGCGTAGGCGGGTCTTTAAGTCAG



AGGTGAAATCCTGGAGCTCAACTCCAGAACTGCCTTTGATACTGTAAGACCTGAGGATGA  
GAGAGGTGAGTGGAATTTCCAGTGTAGAGGTGAAATTCGTAGATATTGGGAAGAACACCG  
GTGGCGAAGGCGGCTCACTGGCTCATTTCTGACGCTCAGGCGCGACAGCGTGGGGATCAA  
ACAGGATTAGAAACCCGAGTAGTCC

>Otu18448

CCAGCCTATGGGAGGCAGCAGTGGGGAATCTTGAACAATGGGCGAAAGCTTGATTCAGCG  
ATATTACCTGGATGAGGGAAGGCCGTGGGGTTGTAAAGTCCTCTAGCCGCAATAAAATTT  
TGATTGTGATTTCGGCAGAAATAGTCCCGCTAATATCTGTGCCAGCAGCCGCGGTAATAC  
AGGGGGGGCAAGCGTTACTCATCTTGATTGGGCGCAAAGGGTATGTAGGCTGTTTCGTCAT  
GAGTGCTTTTTGAAAAGCTAGAGTTTTTAAAGCTTTAGTCAAAAATCGCTATCTGCGCGACT  
AGAGTTAATGAATCGTTAATGAAATTTCCCGGTGTAGCGCTGAAATGCAACGATATTGGGG  
GGAATACTGATAATGAAAATATTTTTTCGTTTATCAACTGACGCTGAGGTACGAAAGCTAG  
GGGAGCAAACGGGATTAGATACCCCGAGTAGTCC

>Otu18449

CCAGCCTATGGGTTGCAGCAGTGAGGAATTTTGGACAATGAGCGACAGCTTGATCCAGCA  
ATATTAAATTGGTGAAGACAGCTCAGTTGGCCGTAAAACCACTACGGCGAGGAAGATAAT  
GACAATAATCGAGGAAAGAAGTCCTGGCCAATGCCGTGCCAGCAGCCGCGGAAATACGGT  
AAGGGCAAGCGTTATTCATCATTAATAGGCGTAAAGGGTGTGCAGGTGGTGAAAAAAAC  
TTCTTTAAAAAGAACAAAGCGGAACCTTTGTATAATGAAGAAAAAATTTGAACTAGAGTT  
TGAATCAAGTTGATAGAATGTTTGGTGTAATGATAAAATGTGACGATATCGAATGGAATA  
CCAATGACGAAGGTAATTTTCTAGATCAAACCTGACATTGAGGCACGAAGGCATAGGGATC  
AAATGGGATTAGATACCCCCGTAGTCC

>Otu18453

CCAGCCTATGGGATGCAGCAGTGGGGAATTATGGACAATGGGCGCAAGCCTGATCCAGCC  
ATGCCGCGTGAGTGAAGAAGGCCTTCGGGTGTAAAGCTCTTTCAGCAGGAACGAAATGG  
TTCGTGCTAATACCACGGAATGATGACGGTACCTGAAGAAGAAGCACCGGCTAACTACGT  
GCCAGCAGCCGCGGTAATACGTAGGGTGCAGGCGTTAATCGGAATTACTGGGCGTAAAGC  
GTGCGCAGGCGGTTTTTCCAAGTCAGTGGTGAAAGCCCCGAGCTCAACTTCGGAATTGCCA  
TTGAAACTGTGAACTTGAGTACGAGAGAGGTGAGTGGAATTTCCAGTGTAGAGGTGAAA  
TTCGTAGATATTGGGAAGAACACCGGTGGCGAAGGCGGCTCACTGGCTCGTTACTGACGC  
TCAGGCGCGACAGCGTGGGGATCAAACAGGATTAGATACCCGTGTAGTCC

>Otu18456

CCAGCCTATGGGGTGCAGCAGTGGGGAATATTGGACAATGGGGGCAACCCTGATCCAGCC  
ATGCCGCGTGAACGATGAAGGCCTTCGGGTGTAAAGTTCTTTTGACGGGGAAGATGATG  
ACTGTACCCGCAGAATAAGCACCGGCTAACTTCGTGCCAGCAGCCGCGGTAATACGAAGG  
GTGCTAGCGTTGTTTCGGAATTACTGGGCGTAAAGGGCGCGTAGGCGGCTTGGCAAGTTGG  
ATGTGAAAGCCCAGGGCTCAACCCTGGAATTGCATTCAAGACTGCTTTGCTTGAATTCGG  
TAGAGGTTGGTGGAATTTCCAGTGTAGAGGTGAAATTCGTAGATATTTCGAAGAACACCA  
GTGGCGAAGGCGGCTCACTGGCCCCATACTGACGCTGAGGCACGAAAGCGTGGGGAGCAA  
ACAGGATTAGATACCCTGGTAGTCC

>Otu18458

CCAGCCTATGGGGGGCACCAAGTAACGAATCTTCCCCAATGCCGGAACCGGTGAGGGAGCG  
ACGCCGCGTGAAGGACGAAGTTCTTCGGAATGTAAACTTATGTAAGGGCCATGAAAGTCC  
AGCGCCTAATACGCGCAAAGATTGATCTGGCCCCCTAAAAGGGGCGGCTAACTCTGTGCCA  
GCAGCCGCGGTAATACAGAGGCCCAAGCGTTACTGAGAATCACTGGGTTTAAAGGGTGC  
GTAGGTGGTCCGTTAAGTTTCGTTGTGAAATCCCTGGGCTCAACCCAGGAAATGCTTCGAA  
TACTGGCGGACTTGAGGCTAGTAGGGGTCACTGGAAGTACGCGTGGAGCGGTGAGATGCG  
TAGATATCGTCAGGAACGCCAATGGTGAAGACAGGTGACTGGGCTAGTTCTGACACTGAG  
GCACGAAAGCGTGGGGATCAAACGGGATTAGATACCCCGAGTAGTCC

>Otu18459

CCAGCCTACGGGTCGCTGCAGTAGGGAATATTGGACAATGGGGGAAACCCTGATCCAGCA  
ACGCCGCGTGATGATGAAGGCCTTCGGGTGTAAATCCTTTTCGGATCCGACGATGATG  
ACGGTAGGATCAGAAGAAGCTCCGGCAAACCTTCGTGCCAGCAGCCGCGGTAATACGAAGG  
GAGCTAGCGTTGTTTCGGAATTACTGGGCGTAAAGGGCGCGTAGGCGGTCATATAAGTCAG  
GCGTGAAAGCCCCGAGCTTAACTCGGGAAGTGCCTTGATACTGTGTGGCTAGAGTTTGG  
GAGAGGTAAGTGGAATTTCCAGTGTAGAGGTGAAATTCGTAGATATTGGGAAGAATATCA  
GTGGCGAAGGCGGCTTACTGGACCAAAACTGACGCTGAGGCGCGAAAGCGTGGGGAGCAA  
ACAGGATTAGAAACCCGAGTAGTCC

>Otu18460

CCAGCCTATGGGTCGCTGCAGTGGGGAATATTGGACAATGGGCGCAAGCCTGATCCAGCC  
ATGCCGCGTGAGTGAAGAAGGTCTTCGGATTGTAAAGCTCTTTCGACGGGGACGATGATG  
ACGGTACCCGTAGAGAAGCCCCGGCTAACTTCGTGCCAGCAGCCGCGGTAATACGAAGG  
GGGCTAGCGTCGCTCGGAATGACTGGGCGTAAAGGGCGCGTAGGCGGTTTCGTACAGTCAG  
AAGTGAAATTCTGGGCTCAACCTGGGGACTGCTTTTGATACGTGTGAGCTAGAGTGGAG  
AAGAGGGTTGTGGAATTTCCAGTGTAGAGGTGAAATTCGTAGATATTGGAAGAACACCG  
GTGGCGAAGGCGGCAACCTGGTCCTTGACTGACGCTGAGGCGCGAAAGCGTGGGGAGCAA  
ACAGGATTAGATACCCTCGTAGTCC

>Otu18465

CCAGCCTACGGGTGGCTCCAGTGGGGAATATTGGACAATGGGGGAAACCCTGATCCAGCG  
ACGCCGCGTGTTGAAGAAGGCCTGCGGGTTGTAAAGCACTTTTAGTGAGACAAAAAGT  
CACGGGCTAACACCGCGTGATCTTGATTTAACCCACAGAAAAAGCACCGGCTAACTCTGT  
GCCAGCAGCCGCGTAATACAGAGGTTGCGAGCGTTAATCGGAATTACTGGGCGTAAAGC  
GTGCGTAGACGGTTTCGTAAAGTCGGGTGTGAAAGCCCCGGGCTCAACCTGGGAATTGCAT  
TCGAGACTGCGAAGCTAGGGTGCAGGAAGAGGGAAGCGGAATTTCTGGTGTAGCGGTGAAA  
TGCGTAGATATCAGAAGGAACATCAGTGGCGAAAGCGGCTTCCTGGTCCAGCGCCGACGT  
TCAGGCACGAAAGCGTGGGGAGCAAACAGGATTAGATACCCTAGTAGTCC

>Otu18486

CCAGCCTATGGGGGCGAGCAGTGGGGAATCTTGACACAATGGGGGAAACCCTGATGCAGCG  
ACGCCGCGTGAGCGATGAAGCCCTTCGGGGTGTAAAGCTCTTTCGACGGGAACGATAATG  
ACGGTACCAGCAAAGGAAGCATCGGCTAACTACGTGCCAGCAGCCGCGGTAAGACGTAGG  
ATGCAAGCGTTGTCCGGATTTATTGGGCGTAAAGAGTTTCGTAGGCGGTTTGTAAAGTCTG  
ACGTTAAAGATCAGGGCTCAACCCTGGGATTGCTTCGGATACTGGCAGACTGGAGTATGG  
TAGAGGTAAGTGGAATTTCTGGTGTAGCGGTGAAATGCGTAGATATCAGGAAGAACACCG  
GTGGCGTAGGCGACTTACTGGGCCATAACTGACGCTGAGGAACGAAAGCCAGGGGAGCGA  
ATGGGATTAGAAACCCGTGTAGTCC

>Otu18494

CCAGCCTACGGGTTGCTGCAGTGGGGAATATTGGACAATGGAGGCAACTCTGATCCAGCC  
ATGCCGCGTGAATGAAGAAGGCCTTCGGGCTGTAAAGCACTTTTGTGAGGAACGAAACGG  
CTCTGGTTAATACCTGGGGCTAATGACGGTACCTGAAGAATAAGCACCGGCTAACTACGT  
GCCAGCAGCCGCGTAATACGTAGGGTGCAAGCGTTAATCGGAATTACTGGGCGTAAAGC  
GTGCGCAGGCGGTTTTGTAAAGACAGATGTGAAATGCCCGGGCCTAACCTGGGAAGTGCAT  
TTGTGACTGCAAGGCTAGAATTTGGCAGAGGGGGGTAGAATTCACGTGTAGCAGTGAAA  
TGCGTAGATATGTGGAGGAATACCGATGGCGAAGGCAGCCCCCTGGGCTAAAATTGACGC  
TCATGCACGAAAGCGTGGGGAGCAAACAGGATTAGATACCCGAGTAGTCC

>Otu18498

CCAGCCTACGGGGCGCAGCAGTGGGGAATATTGCGCAATGGAGGAAACTCTGACGCAGCG  
ACGCCGCGTGGGTGATGAAGGCCTTCGGGTGTAAAGCCCTGTGCGCTGGGAAAAAGGTA  
GTCGTGCTAATACCACGATTGCTTGATGGTACCAGCAAAGGAAGCACCGGCTAACCTGT  
GCCAGCAGCCGCGTAATACAGGGGGTGCTAGCGTTGTTTCGGAATTACTGGGCGTAAAGG  
GCGCGTAGGCGGCTCAATAAGTCTGTTGTGAAATCCCGGGGCTTAACTCCGGACGTGCAG  
TGGAAGTATTGGGCTTGAGTGTAGTAGAGGTTGGTGGAATTCACAGTGTAGAGGTGAAA  
TTCGTAGATATTGGGAGGAACACCGGTGGCGAAGGCGGCCAACTGGGCTACAAGTACGC  
TGAGGCGCGAAAGCGTGGGGATCAAACAGGATTAGATACCCCGTAGTCC

>Otu18504

CCAGCCTATGGGGGCGCAGCAGTGGGGAATCTTGCGCAATGGACGAAAGTCTGACGCAGCA  
ACGCCGCGTGGGGGATGAAGCTTCTCGGAGTGTAACCCCTTTCGACCCGGACGAATGCC  
CGCAAGGGTTTGACGGTACGGGTATAAGAAGCCCCGGCTAACTACGTGCCAGCAGCCGCG  
GTAAAACGTAGGGGGCCAGCGTTGCTCGGAATTACTGGGCGTAAAGGGTAGGTAGGTGGT  
CTCGTTTGTCTGGGGTGAAGCCTTGAGCTTAACTCAAGAAAGTGCCTCAGAAACGGCGAG  
ACTCGAGTCTTGAGAGGGTTCGTGGAATTCCTGGTGTAGCGGTGAAATGCGTAGAGATCG  
GGAGGAACACCAGAGGCGAAGGCGCGACCTGGACAAGTACTGACACTCAACTACGAAAG  
CGTGGGTAGCAAACAGGATTAGAAACCCCTGTAGTCC

>Otu18513

CCAGCCTACGGGACGCACCAAGTGGGGAATTTTGCGCAATGGGGGAAACCCTGACGCAGCA  
ACGCCGCGTGGAGGATGAAGTACTTCGGTACGTAAACTCCTTTCGATCGGGACGATAATG  
ACGGTACCAGATGAATAAGCACCGGCTAACTCCGTGCCAGCAGCCGCGGTAATACGGAGG

GTGCAAGCGTTATCCGGATTCACTGGGTTTAAAGGGTACGTAGGCGGGCAGGTAAGTCAG  
TGGTGAAATCTCCGGGCTCAACCCGGAAACTGCCGTTGATACTATTTGTCCTGAATGTCG  
TGGAGGTTAGCGGAATATGTCATGTAGCGGTGAAATGCTTAGATATGACATAGAACACCA  
ATTGCGAAGGCAGCTAGCTACACGGTTATTGACGCTGAGGCACGAAAGCGTGGGGATCAA  
ACAGGATTAGAAACCCGCGTAGTCC

>Otu18530

CCAGCCTACGGGGCGCTCCAGTCGAGAATCTTTCGCAATGGGCGAAAGCCTGACGAAGCG  
ACGCTGCGTGAGCGATGAAGGCCTTCGGGTCGTAAAGCTCTTTCGCGCAAGAACAAGGAA  
GGTGGGTGAATAACCTACCGACTTGAGGGTACTGCGTAAAGAAGCACCGGCTAACTCCGT  
GCCAGCAGCTGCGGTAATACGGAGAGTGCAAGCATTAAATCGGAATGATTGGGCGTAAAGG  
GCGCGTAGGCGGAAGTATAAGTCAGATGTGAAATTCGGAAGCTCAACTTCGGAGCTGCAT  
TTGAAACTGTACATCTAGAGGTATGACGGAGAAAACGGAATTCACGTGTAGCGGTGAAA  
TGCGTAGATATGTGGAAGAACACCTGTGGCGAAAGCGGTTTCTAGTTGTTACCTGACGC  
TGAGGCGCGAGAGCAAGGGGAGCAAACAGGATTAGAGACCCGCGTAGTCC

>Otu18546

CCAGCCTACGGGTCGCTCCGGTAGGGAATATTGGACAATGGGCGAAAGCCTGATCCAGCA  
ATGCCGCGTGAGTGATGAAGGCCTTAGGGTTGTAAAGCTCTTTCGGGTGGGACGATGATG  
ACGGTACCACCAGAAGAAGCCCCGGCTAACTTCGTGCCAGCAGCCGCGGTAATACGAAGG  
GGGCTAGCGTTGTTTCGGAATTACTGGGCGTAAAGCGCACGCAGGCGGCTCGATAAATTAG  
AAGTGAAAGCCTTGGGCTTAACCTGAGAATTGCTTTTAAGACTGTCGAGCTAGAATCCAG  
AAGAGGGTAGTGGAATTCGAGAGTGTAGAGGTGGAATTCGTAGATATTTCGGAAGAACACCA  
GTGGCGAAAGCGGCTCACTGGACCATAACTGACGCTGATGCATGAAAGCTAGGGGAGCAA  
ACAGGATTAGATACCCGTGTAGTCC

>Otu18547

GGACTACTGGGGTCTCTAATCCTGTTTGCTCCCCACGCTTTCGCGCCTCAGCGTCAGTAT  
CGGTCCAGTGAGCCGCCTTCGCCACCGGTGTTCTTCCCAATATCTACGAATTTACCTCT  
ACACTGGGAATTCCACTCACCTCTCTCGTACTCAAGTCTCACAGTTTCAATGGCAGTTCC  
GGAGTTGAGCTCCGGGCTTTCACCACTGACTTGGAAGACCGCCTGCGCGCGCTTTACGCC  
CAGTAATTCGGAACAACGCTAGCCCCCTTCGTATTACCGCGGCTGCTGGCACGAAGTTAG  
CCGGAGCTTCTTCTACGGGCACCGTCATTATCGTCCCCGTCGAAAGAGTTTTACAACCCG  
AAGGCCTTCATCACTCACGCGGCGTGCTGGATCAGGGTTTCCCCCATTTGTCCAAGATTCC  
CCAATGCTGCGCCCCATAGGCTGG

>Otu18575

CCAGCCTATGGGGGGCAGCAGTAGGGAATCTTGCGCAATGGACGAAAGTCTGACGCAGCG  
ACGCCGCGTGGGTGACGAAGGCCTTCGGGTCGTAAAGCCCTGTCGGTAGGGAAGAAAAAT  
GAGTTGGCTAACATCCAATTCAATTGACGGTACCTGCAGAGGAAGCACCGGCTAACTACG  
TGCCAGCAGCCGCGGTAATACGTAGGGTGCTAGCGTTGTTTCGGAATCATTGGGCGTAAAG  
CGCGTGTAGGCGGTTAGTTAAGTCTTGTGTGAAATCCCTCGGCTCAACCGAGGAAGTGCA  
TGGGAAACTAATTAGCTTGAAGACGGCAGAGGAAGGTGGAATTCCAAGTGTAGAGGTGAA  
ATTCGTAGATATTTGGAGGAATACCGGTGGCGAAGGCGGCCTTCTGGACCGATCTTGACG  
CTGAGACGCGAAAGCGTGGGGAGCAAACAGGATTAGATACCCGAGTAGTCC

>Otu18577

GGACTACTGGGGTATCTAATCCTGTTTGCTCCCCACGCTTTCGTGCATGAGCGTCAGTAT  
TGGCCCAGGGGGCTGCCTTCGCCATCGGTATTCCCTCCACATCTCTACGCATTTCACTGCT  
ACACGTGGAATTCTACCCCCCTTTGCCATACTCTAGCCCGCCAGTCACAAATGCAGTTCCC  
AGGTTAAGCCCGGGGATTTACATCTGTCTTAGCGAACCGCCTGCGCACGCTTTACGCCC  
AGTAATTCCGATTAACGCTTGCTGCCTACGTATTACCGCGGCTGCTGGCACGTAGTTAGC  
CGCAGCTGCTTTTGCAGGTACCGTCATAATCTTCCCTGCCGAAAGAGCTTTACACCCCGA  
GGGGCTTCATCGCTCACGCGGCGTCGCTGCATCAGGGTTTCCCCCATTTGTGCAAGATTCC  
CCACTGCTGCACCCCGTAGGCTGG

>Otu18585

CCAGCCTACGGGTTGCAGCAGTGGGGAATATTGGACAATGGGGGCAACCCTGATCCAGCC  
ATGCCGCGTGAGTGACGAAGGCCTTCGGGTGTAAAGCTCTGTTCTCAGGGAAAAAGCAA  
GTGATTGTACCTGAGAAGAAAGACCGGCTAACTTCGTGCCAGCAGCCGCGGTAAGACGA  
GGGGTCCAAGCGTTGTTTCGGAATCATTGGGCGTAAAGCGGGTGTAGGTGGCTCTGTAAGT  
CAGGAGTGAAAGCCCCGAGCTTAACTCGGGAAAGTGCTTTTGATACTGCAGAGCTTGAGTG  
TGGGAGAGGATCGTGGAATTCAGGTGTAGTGGTGAAATACGTAGATATCTGGAGGAACA  
CCGGTGGCGAAGGCGGCGATCTGGCCCAACACTGACACTGAGACCCGAAAGCGTGGGGAT

CAAACAGGATTAGAGACCCTAGTAGTCC

>Otu18588

CCAGCCTACGGGTTGCACCAGTGGGGAATTTTGCGCAATGGGGGAAACCCTGACGCAGCA  
ACGCCGCGTGAGGATGAAGTCCTTCGGGACGTAAACTCCTTTTCGATCGGGACGATTATG  
ACGGTACCGGAAGAAGAAGCCCCGGCTAACTTCGTGCCAGCAGCCGCGGTAATACGAGGG  
GGCGAGCGTTGTTTCGGAATTATTGGGCGTAAAGAGCTCGTAGGCGGTTTCGACAAGTCGGG  
TGTTAAACCCCCAGGCTCAACCTGGGGCCGCCACCCGAAACTGTTGTGACTAGAGTTTGG  
TAGGGGATCACGGAATTCCTGGTGTAGCGGTGGAATGCGCAGATATCAGGAGGAACACCA  
GTAGCGAAGGCGGTGATCTGGGCCAATACTGACGCTGAGGAGCGAAAGCGTGGGGAGCAA  
ACAGGATTAGATACCCCAGTAGTCC

>Otu18590

CCAGCCTACGGGGGGCAGCAGTCGAGGATCTTCGGCAATGGGCGAAAGCCTGACCGAGCG  
ACGCCGCGTGCGGGATGAAGGCCTTCGGGTTGTAAACCGCCGTCGGAGTGGAGGAAATTC  
TATAGGGTAATCCCTTTAGATTGACTAATACTCAGAGGAAGGACGGGCTAAGTACGTGCC  
AGCAGCCGCGGTAATACGTACCGTCCAAACGTTATTTCGGAATCACTGGGCTTAAAGGGTG  
CGTAGGCGGCTCAGAAAGTAGGGTGTGAAAGCCCTCGGCTCAACCGAGGAATTGCGCCCT  
AAACTACTAAGCTTGAGGGAGACAGAGGTAAGCGGAACCTAGGGTGGAGCGGTGAAATGC  
GTTGATATCCTAAGGAACACCAGGAGCGAAGGCGGCTTACTGGGTCTCTTCTGACGCTGA  
GGCACGAAAGCTAGGGGGGCGAACGGGATTAGAAACCCGTGTAGTCC

>Otu18595

CCAGCCTACGGGGGGCTCCAGACGAGAATATTCCGCAATGGACGAAAGTCTGACGGAGCG  
ACGCCGCGTGATGGATGAAGTGCCCTTGGTACGTAAACATCTTTTATCGGGGACGAAGTTT  
ATTGACGGTACCCGATGAATAAGGGGCTCCTAACTCTGTGGCAGCAGGAGCGGTAATACA  
GAGGCTCCAAGCATTACCCGGAATCACTGGGCGTAAAGGGTGTCTAGGCGGCCATGTTAG  
TCGTTTCGTTAAATCTGCGGGCTTAACCTGCGGGCTGCGAGCGAAACGGCATGGCTCGAGG  
GCGCGAGAGATGTATGGAACCTCATGGTGGAGGGGTGAAATCCGTTGATATCATGGGGAAC  
ACCAAAGGCGAAGGCAATACATTGGCGCGTTCTTGACGCTCACACACGAAAGCCAGGGTA  
GCAAACGGGATTAGATACCCCCGGTAGTCC

>Otu18599

CCAGCATATGGGGGGCAGCAGTGGGGAATATTGGACAATGGGGGGAACCCTGATCCAGCA  
ATGCCGCGTGTTGAAGAAGGCCTGAGGGTTGTAAAGCACTTTTCAGTGGGGAGGAGGTTA  
TATTGGTTAAGAGCTGATATGGTGGACGTTACCCACAGAAGAAGCACCGGCTAACTCCGT  
GCCAGCAGCCGCGTAATACGGAGGGTGCAAGCGTTAATCGGAATTACTGGGCGTAAAGG  
GTGCGTAGGTTGTTTGATAAGATATCTGTGAAATCCCTGGGCTTAACCTGGGCAGGACGG  
ATGTGACTGTTGAACTGGAGTATGGGAGAGGGTAGTGGAATTTCCGGTGTAGCGGTGAAA  
TGCGTAGAGATCGGAAGGAACACCGGTGGCGAAGGCGGCTACCTGGCCTAATACTGACAC  
TGAGGCACGAAAGCGTGGGGAGCAAACAGGATTAGAGACCCCGGTAGTCC

>Otu18604

CCAGCCTATGGGTGGCACCAGTGGGGAATATTGGACAATGGGGGCAACCCTGATCCAGCC  
ATGCCGCGTGAAATGATGAAGGCCTTCGGGTTGTAAAGTTCTTTTGCAGGGGACGATGATG  
ACGGTACCCTGAGAATAAGCACCGACTAACTTCGTGCCAGCAGCCGCGGTAATACGAAGG  
GTGCTAGCGTTGTTTCGGAATTACTGGGCGTAAAGGGCGCGTAGGCGGTTTAAACAAGTTGG  
GTGTGAAAGCCCAGGGCTCAACCCTGGAACCTGCACTCAAGACTGTTTTACTTTAGTTTCGG  
TAGAGGATGGTAGAATTCACAGTGTAGAGGTGAAATTCGTAGATATTGGGAAGAATACCC  
GTGGCGAAGGCGGCCATCTGGACCGACATTGACGCTGAGGCGCGAAAGCGTGGGGAGCAA  
ACAGGATTAGAGACCCCTCGTAGTCC

>Otu18607

CCAGCCTACGGGTTGCTGCAGTGAGGAATACTGGACAATGGGCGCAAGCTTGATCCAGCA  
ATATCACATGGGAGAAGAAGACTTTTTGTTGTAAATCTATTGCGTTAAGGAGGATAATGA  
CGTGTACTTAAAGAAAAAGTCCCGGCTAACTTCGTGCCAGCAGCCGCGGTAATACGGAGG  
GGACGAGTGTTACTCATAATAACTGGGCGTAAAGGGTACGTAGGTGGTTTATTTAGTTAA  
ATAAAAAAAAAATAATTAATAGTTTATAACTTTATTTAAACGAGTAACTAGAGTATAA  
GAGAAGAATATGGAATTTTTAGTGTAAGGGTGAAATCTAACGATAATAAAAAGACGATCG  
AAGGCGAAGGCAATATTCTAGATTATTACTGACACTGAGGTACTGAAGCATGGGGAGCAA  
ATCGGATTAGATACCCTAGTAGTCC

>Otu18610

CCAGCCTATGGGTGGCTCCAGTGGGGAATATTGGACAATGGGCGCAAGCCTGATCCAGCC  
ATGCCGCGTGAGTGACGAAGGCCTTAGGGTTGTAAAGCTCTTTTCGAAGCGACGATAATG

ACGGTAGCTTGAGAAGAAGCCCCGGCTAACTCCGTGCCAGCAGCCGCGGTAAAGACGGAGG  
GGGCTAGCGTTGTTTCGGAATTACTGGGCGTAAAGCGCGCGCAGGCGGTCTTCCAAGTCAG  
TGGTGAAAGCCCCGAGCTCAACTCCGGAAGTCCATTGAAACTGTGAGACTTGAGTACGA  
GAGAGGTGAGTGGAATTCACAGTGTAGAGGTGAAATTCGTAGATATTGGGAAGAACACCG  
GTGGCGAAGGCGGCTCACTGGCTCGTAACTGACGCTCAGGCGCGACAGCGTGGGGATCAA  
ACAGGATTAGAGACCCCTGTAGTCC

>Otu18614

CCAGCCTACGGGAGGCAGCAGTGGGGAATATTGGACAATGGGCGCAAGCCTGATCCAGCA  
ATGCCGCGTGAGTGAGGAAGGCCTTAGGGTTGTAAAGCTCTTTCACCCACGACGATGATG  
ACGGTAGTGGGAGAAGAAGCCCCGGCTAACTTCGTGCCAGCAGCCGCGGTAAATACGAAGG  
GGGCGAGCGTTGTTTCGATTACTGGGCGTAAAGGGCGCGCAGGCGGCTATCTTTGTGTCAG  
GCGTGAAAGCCCCGGGCTTAACCTGGGAAGTGCCTTTGATACTGTAGTGCTAGAGTTCGG  
GAGAGGTGAGTGGAATTCACAGTGTAGAGGTGAAATTCGTAGATATTGGGAAGAACACCG  
GTGGCGAAGGCGGCTCACTGGACCGATACTGACGCTGAGGCGCGAAAGCGTGGGGAGCAA  
ACAGGATTAGAAACCCGAGTAGTCC

>Otu18618

CCCAGCCTACGGGGCGCACCAGTGGGGAATATTGGACAATGGGGGAAACCCTGATCCAGC  
GACGCCGCGTGTTGTAAGAAGGCCTGCGGGTTGTAAAGCACTTTTAGTGGGGATGAAAAG  
TTCAGGGCTAATACCTCTGGATCTTGACCTAACCCAAAGAAAAAGCACCGGCTAACTCTG  
TGCCAGCAGCCGCGGTAATACAGAGGGTGCAAGCGTTAATCGGAATTACTGGGCGTAAAG  
CGTGCGTAGACGGTTATGTAAGTCAGGTGTGAAAGCCCCGGGCTCAACCTGGGAATGCCA  
TTTGAGACTGCATAGCTAGGGTACGGAAGAGGGAAGCGGAATTCAGGTGTAGCGGTGAG  
ATGCGTAGATATCTGAAGGAACACCAGTGGCGAAAGCGGCTTCCTGGTCCAGTACCGACG  
TTCAGGCACGAAAGCGTGGGGAGCAAACAGGATTAGAAACCCTTGTAGTCC

>Otu18621

CCAGCCTATGGGTGTCACCAGTAGGGAATATTGGACAATGGGCGGAAGCCTGATCCAGCC  
ATGCCGCGTGTCAGGAAGAAGGCCTTCTGGGTGCTAAACTGCTTTTCCCGGGGGATAAAAA  
GGTCCTGCGGGGCAAATTGAAGGTACCCGGGGAATAAGCCACGGCTAACTACGTGCCAGC  
AGCCGCGGTAATACGTAGGTGGCGAGCGTTGTCCGGATTTATTGGGTTTAAAGGGTGCGT  
AGGCGGCCCTGTAAGTCAGTGGTGAATACGGCAGCTCAACTGTGAGGTGCCATTGATA  
CTGCGGGGCTTGAGTATGGACGAGGTAGGCGGAATTGACGGTGTAGCGGTGAAATGCTTA  
GATATCGTCAAGAACACCGATAGCGAAGGCAGCTTACTAGGCCATAACTGACGCTGATGC  
ACGAAAGCGTGGGGAGCAAACAGGATTAGAGACCCCTGTAGTCC

>Otu18622

CCAGCCTATGGGTGGCAGCAGTGAGGAATCTTCGACAATGGGGGAAACCCTGATCGAGCG  
ACGCCGCGTGTTGGGATGAAGCATTTTCGGTGTGTAAACCACTTTTCTGAGGGAAGAGAAGG  
GACGGTACCTCAGGAATCAGCATCGGCTAACTACGTGCCAGCAGCCGCGGTAATACGTAG  
GATGCGAGCGTTGTCCGGAGTTACTGGGCGTAAAGCGTGTGACGGCGGTCGTTTGCGTCT  
GGGGTGAAATCTCCTGGCTTAACCTGGGAGGACGCCACGGAAACGGGACGACTTGAGGGCT  
GGAGAGGGAAGTAGAACTCCCGGTGGAACAGTGAAATGTGTAGAGATCGGGAAGAATACC  
AGAGGTGAAGACGGCTTCCTGGCCAGAACCCTGACGCTCAGACACGAAAGCTTGGGGAGCA  
AACAGGATTAGAAACCCTGGTAGTCC

>Otu18624

CCAGCCTACGGGAGGCAGCAGTTAGGGAACTTTTCCAATGCGCGCAAGCGTGAGAAAGTA  
AGCCGGAGTGATACAGATATAATTTCTGTATCTTTTGTTGTTGTGAAAATACAGACGAA  
TAAGGAGTGGGCAAGATCGGTGCCAGCCCGCGGTAATCCCGACGCTCCAAGTCGCAGC  
CACAATTATTGGGTCCAAAACATTCGTAGCTTGTTCGTTAAGCTCTTTGTGAAATCTTAC  
ATCTTAAGTGTAAGGCGTGCAAGGAATACTGGCGAGCTCGGGACCGGAAGAAGTAAAGAG  
TATGCTCGAGGTAGTGGTAAAATATGTTAATCTGGAGCAGACTAACAACAGCGAAGGCAC  
TTTACTAGTACGGATCTGACAGTGAGGAATGAAGGCTAGGGGCGCAAAGTGGATTAGATA  
CCCTTGTAGTCC

>Otu18629

CCAGCCTATGGGGTGCTGCAGTCGAGAATCTTCCGCAATGCACGAAAGTGTGACGGAGCG  
ACGCCGCGTGATTGATGAAGCCCTCCGGGGTGTAAGATCTTTTATGCATGAGAAAATTA  
TTGATGTTAGTGTCATGAATAAGGGGCTCCTAACTCTGTGCCAGCAGGAGCGGTAATACAG  
AGGCCCCGAGCGTTATTTCGGAATTATTGGGCGTAAAGGGTGCGTAGGTGGTTTGGTTAGT  
CCAATGTCAAAAATCTGTGCTCAACACAGGGGAGGCATTTCGAAACGGCCAGACTCGAGTA  
GGTGAGAGGTGAATGGAAGTCAATGGAGGAGGGGTGAAATCCGTTGATATCATGGGGAACA

CCAAATGCGAAGGCAATTCACTGGCGCCTTACTGACACTCAAGCACGAAAGCGTGGGGAG  
CAAACAGGATTAGAAACCCGTGTAGTCC

>Otu18632

CCAGCCTATGGGTCGCTGCAGTCGAGAATCTTCCACAATGGACGAAAGTCTGATGGAGCG  
ACGCCGCGTGATTGATGAAGTCCTTCGGGACGTAAAGATCTTTTATGAGGGAAGAAGTTT  
ATTGACTGTACCTCATGAATAAGGGGCTCCTAATCTCGTGCCAGCAGGAGCGGTAATACG  
AGAGCCCCAAGCGTTATCCGGAATTATTGGGCGTAAAGGGTGCCTAGGCGGCATTGTTAG  
TCAGGTGTTAAAGCCCCGAGCTTAACCTGGGACATGCACTTGAAACGGCAAAGCTTAGAA  
TGAAGGAGAGGTGTGCGGAACCTCATGGTGTAGGGGTGAAATCCGTTGATATCATGGGGAA  
CACCAAATGCGAAAGCAGCACACTGGCCTTTTATTGACGCTGAGGCGCGAAAGCTAGGGG  
AGCAAACAGGATTAGATACCCCTCGTAGTCC

>Otu18663

CCAGCCTATGGGTTGCTCCAGCTGGGAATCTTCTGCAATACACGCAAGTGTGACAGAGCG  
AACCAGAGTGTTCCTCATTGAGGAACCTTTTGCCAAATCTAAAAAGTTTGCGCAATAAGGA  
CTGGGCAAGACTAGTGCCAGCCGCCGCGGTAATACTAGCTGTCCAAGTCGCAGCCATTTT  
TATTGGGTCTAAAACATCCGTAGCTTGCTTAGTAAGTTTCTTGTGAAATTCTATATCTCA  
AGTATAGAGCGTGCAAGGAATACTACTTGGCTAGAGACTGGGAGACGTAAGAAGTACGTT  
TGAAGTAGCGGTTAAATGCGTTAATCTTAGACGGACTCACAACAGCGAAGGCATCTTACG  
AGAACAGTTCTGACAGTGAGGGATGAAGGCCAGGGGCGCAAAACGGATTAGAAACCTGTA  
GTCC

>Otu18668

CCAGCCTATGGGGGGCTGCAGCTAAGAATATTCCGCAATGGGAGCAATCCTGACGGAGCG  
ACGCCGCGTGAAATGATGAAGGCCGAAAGGTTGTAAATTCCTTTTATACGGGAAGAATAAG  
TGTGGTGAGAGAAACGCCATATGATGACGGTACCGTATGAATAAGCCCCGGCTAACTACG  
TGCCAGCAGCCGCGGTAATACGTAGGGGGCAAGCGTTGTTCCGATTTCATTGGGCGTAAAG  
GGCATGTAGGCGGTTGCGTAAGTGTGGATTTAAAGGCGGAGGCTTAACCTCTTGTTTGGC  
CTGCAAACCTGCGCGGCTGGAGTACAGAAGGGGAAACTGGAATTCCGTGTGTAGGGGTGAA  
ATCTGTAGATATGCGGAAGAATACCTGTGGCGAAGGCGAGTTTCTGGTCTGTAACCTGACG  
CTAAAATGCGAAAGTGTGGGTATCAAACAGGATTAGAGACCCTCGTAGTCC

>Otu18675

GGACACAGGGGTTTCTAATCCTGTTTGCTCCCCATGCTGTCGCGCATCAGTGTGAGGTAC  
GGCCCAGCGTGTCGCCTTCGCCACTGGTGTTCCTCCGGATCTCTACGCATTTACCACCTA  
CACCCGGAATTCACACGCCTCTACCGTCTCTAGCTCCGCAGTATCCGACGACCTGCCT  
CGGTTAAGCCGAGAAATTTACGCCAGACTTACGAAACCACCTACACGCCCTTTACGCC  
AGTAACTCCGGATAACGTTTGTCTCCTACGTTTTACCGCGGCTGCTGGCACGTAGTTAGC  
CGAGACTTATTCTGTGCTACCGTCTTGTCTGTCACACAGAAAAGGGTTTTACGATCCG  
AAAACCTTCTTCACCCACGCGGCTCGCTGCATCAGGCTTGCGCCCATTGTGCAATATTC  
CTCACTGCTGCGCCCCGTAGGCTGG

>Otu18682

CCAGCCTACGGGGTGCAGCAGTAGGGAATATTGCTCAATGGGGGAAACCCTGAAGCAGCA  
ACGCCGCGTGAGTGATGAAGGCCTTCGGGTCGTAAAGCTCTGTTGTACGGGAAGAATGTG  
GGAACAGCTAACATCTGTTACCAGTGACGGTACCGTATAAGAAAGGACCGGCTAACTTCG  
TGCCAGCAGCCGCGGTAAGACGGGGGGTCCAAGCGTTGTTCCGAATCATTGGGCGTAAAG  
CGTGTGCAGGTGGCTCTGTAAGTTAGATGTGAAAGCCTCGGGCTCAACCCGAGAAGTGCA  
TTTAAAACTACAGAACTTGAGTAAGGAAGAGGGTCGTGGAATTCCAGGTGTAGTGGTGAA  
ATACGTAGATATCTGGAGGAACACCGGTGGCGAAGGCGGCGACCTGGTCCTATACTGACA  
CTCATAACAGAAAGCGTGGGGATCAAACAGGATTAGATACCCTGGTAGTCC

>Otu18683

CCAGCCTACGGGTCGCACCAGTAAGGAATATTGGGCAATGGACGACAGTCTGACCCAGCC  
ATGCCGCGTGAAAGGATGAAGGCTCTAGTAGTCGTAAACTTCTTTTATACGGGAAAAATTC  
CGGGATCGTGAAATCCCGGTTGATGGTACTGTATGAATAAGCATCGGCTAACTCCGTGCCA  
GCAGCCGCGGTAATACGGAGGATGCAAGCGTTATCCGGATTTATTGGGTTTAAAGGGTGC  
GCAGGCGGGGCGATAAGTCAGCGGTGAAATCCTACGGCTTAACTGTAGAATTGCCATTGA  
TACTGTCTGTTCTTGAGTACAGCTGAAGAGGGCGGAATGTGTTGTATAGCGGTGAAATGCT  
TAGATATAACACAGAACACCGATTGCGAAGGCAGCTCTCTAAACTGTAACTGACGCTGAG  
GCACGAAAGCGTGGGGATCAAACAGGATTAGATACCCGCGTAGTCC

>Otu18692

CCAGCCTACGGGGCGCTGCAGTAGGGAATCTTGCACAATGGGCGAAAGCCTGATGCAGCA

ATGCCGCGTGAGTGAGGAAGGCCTTCGGGTTGTAAACTCTGTTCTTAGGGAAAAATGTC  
TTATGGGTTAATACCCCATAGGAGTGATGGTACCTGAGGAGAAAGCACCGGCTAACTTCG  
TGCCAGCAGCCGCGGTAATGCGAAGGGTGCAAGCGTTGTTTCGGATTTATTGGGCGTAAAG  
CGCGCGCAGGCGGATGAGTGTGTCAGATGTTAAATCATGGGGCCCAACCCCATGGGTGCG  
TCTGAAACTGCTCGTCTAGAATGTCGGAGGGGGTAGGGGAATCTCATGTGTAGGGGTAAA  
ATCCGTAGAGATATGAGTGAACACCTGAGGCGAAGGCGCCTACCTGGACGATTATTGACG  
CTGAGGCGCGAAAGCGTGCGGAGCAAACAGGATTAGATAACCCCTGTAGCC

>Otu18695

CCAGCCTACGGGAGGCTCCAGTGAGGAATCTTCGACAATGGGGGAAACCCCTGATCGAGCG  
ACGCCGCGTGGGGGATGAAGCATTTTCGGTGTGTAAACCCCTTTTCTCTGGGACGAGAAGG  
GACGGTACCAGAGGAATAAGCATCGGCTAACTACGTGCCAGCAGCCGCGGTAATACGTAG  
GATGCGAGCGTTGTCCGGAATTACTGGGCGTAAAGCGTATGCAGGCGGTCCTGCAGGTCT  
GTGATGAAATCTCCTGGCTCAACTGGGAGGGTGTTCGGGAAACCGCGGGACTAGAGGGCT  
TGAGAGGGACATAGAACTCCCGGTGGAACAGTGAAATGTGTAGAGATCGGGAAGAATACC  
AGAGGGGAAGCCGCTGTCTGGCGAGTGCCCTGACGCTCAGATACGAAAGCTAGGGGAGCG  
AATGGGATTAGAAACCCCTGTAGTCC

>Otu18701

CAGCCTACGGGGGGCACCAGTAGGGAATATTGGGCAATGGGCGAAAGCCTGACCCAGCAA  
CGCCGCGTGACGATGAAGGTCTTCGGATCGTAAAGTGCTTTTCTGAGAGATGGGAAAGG  
ACAGTATCTCAGGAATAAGTCTCGGCTAACTACGTGCCAGCAGCCGCGGTAACACGTAGG  
AGACAAGCGTTATCCGGATTTACTGGGTGTAAAGCGCGTGATAGGCGGCTCTGTAAGTTGG  
ATGTGGAAGCTCCTGGCTTAACTGGGAGAGGTTGTTCAAGACTGCAGGGCTTGAGGGTAA  
CAGAGGGGAGTGGAATTCGAGTGATAGCGGTAAAATGCATAGATATTTCGGAAGAACACCA  
GTGGCGAAAGCGGCTCTCTGGGTTACATCTGACGCTGATGCACGAAAGCTAGGGGAGCAA  
ACAGGATTAGAAACCCCGTAGTCC

>Otu18747

CCAGCCTACGGGTTGCAGCAGTGAGGAATATTGGTCAATGGACGCAAGTCTGAACCAGCC  
ATGCCGCGTGAAGGATGAAGGCGTTCTGCGTTGTAAACTTCTTTTATCTGGGAAGAAACC  
ACTCTTTTCTAAGAGTGCCGACGGTACCAGAGGAATAAGCACCGGCTAACTCCGTGCCAG  
CAGCCGCGGTAATACGGAGGGTGCGAGCGTTATCCGGATTTACTGGGTTTAAAGGGTGTG  
TAGGCGGATTATTAAGTCAGTGGTGAAATCCCGGGGCTCAACCCCGGAAGTCCATTGAT  
ACTATTAGTCTTGAATACTGTGGAGGTGAGCGGAACGTGTCATGTAGCGGTGAAATGCTT  
AGAGATGACACAGAACACCGATTGCGAAGGCAGCTCACTACGCAGTTATTGACGCTGAGG  
CACGAAAGCGTGGGGATCAAACAGGATTAGAGACCCGCGTAGTCC

>Otu18760

CCAGCCTACGGGTGGCACCAGTAGGGAATATTGGTCAATGGGCGCAAGCCTGAACCAGCC  
ATGCCACGTGCAGGATGAATGCCCTATGGGTTGTAAACTGCTTTTGTACGGGAAGAAATC  
TGCATTTCGTGAATGCAGTTGACGGTACCGTAAGAATAAGGATCGGCTAACTTCGTGCCAG  
CAGCCGCGGTAAGACGAAGGATCCAAGCGTTGTCCGGATTTACTGGGTTTAAAGGGAGCG  
TAGGCGGATGAATAAGTCAGTGGTGAAAGCCTACAGCTTAACTGTAGAATTGCCATTGAA  
ACTGCTCATCTCGAGTACGGCTGAGGTCACTGGAATGTAACATGTAGCGGTGAAATGCTT  
AGATATGTTACAGAACACCAATTGCGAAGGCAGGTGACTAAACCGTAACTGACGCTGAGG  
CTCGAAAGCGTGGGGAGCAAACAGGATTAGAGACCCCTGGTAGTCA

>Otu18767

CCAGCCTACGGGTGGCAGCAGTCGAGAATTTTTCACAATGGGCGCAAGCCTGATGGAGCG  
ACGCCGCGTGGGGGATGGATGGCTTCGGCCCGTAAACCCCTGTCATTTCGCGATCAAACCT  
CGTTATTTAAAGATGACGAGCTGATAGTAGCGGAAGAGGAAGGGACGGCTAACTCTGTG  
CCAGCAGCCGCGGTAATACAGAGGTCCCAAGCGTTGTTTCGGATTCACTGGGCGTAAAGGG  
TGCGTAGGCGGTTCGGTAAGTCCGACGTGAAATCCCGCAGCTTAACTGCGGAACGGCGTT  
GGATACTATTTCGGCTGGAGGGTGGGAAGGGGGACTGGAATTCTCGGTGTAGCAGTGAAAT  
GCGTAGATATCGAGAGGAACACCAGCGGCGAAGGCGAGTCCCTGGACCACTCCTGACGCT  
GAGGCACGAAAGCTAGGGGAGCAAACAGGATTAGATAACCCGCGTAGTCC

>Otu18769

CCAGCCTATGGGGGGCAGCAGTGGGGAATTTTGGACAATGGGCGCAAGCCTGATCCAGCC  
ACGCCGCGTGGGGGACGAAGGCCTTCGGGTGCTAAACCCCTGTCAGTAGCTAAGAACATG  
CCGCCGGTTAATAGCCGGCGGTATTGACTAGTTGCAGAGGAAGGGACGGCTAACTTCGTG  
CCAGCAGCAGCGGTAATACGGAGGTCCCTAGCGTTGTTTCGGATTCACTGGGCGTAAAGGG  
CGTCTAGGCGGGATGTCAAGTCGGGTATGAAATGCTCTGGCTCAACTAGAGAATTGTGCC

CGAAACTGGCAACCTTGAGAGTAGCAGAGGACAGTGGAACCTCTTGGTGGAGCGGTGAAAT  
GCGTAGATATCAAGAGGAACGCCGAGGCGAAAGCGATTGTCTGGGCTATTTCTGACGCT  
GAAGCGCGAAAGCTAGGGGAGCAAACGGGATTAGATACCCTAGTAGTCC

>Otu18770

CCAGCCTATGGGGGGCTCCAGTGGGGAATCTTGCGCAATGGACGAAAGTCTGACGCAGCG  
ACGCCGCGTGGGTGATGAAGGCCTTCGGGTGTAAAGCCCTGTGGGAGGGACGAATAAG  
TGGTGGCTAATATCCACCATGATGACGGTACCTCTTTAGCAAGCACCGGCTAACTCTGTG  
CCAGCAGCCGCGATAAGACAGAGGGTGCAAACGTTGTTTCGGAATTACTGGGCGTAAAGCG  
CGTGTAGGCGGCAAGGTAAGTCGGGTGTGAAAGCCCTGAGCTCAACTCAGGAAGTGCAC  
CGATACTACCTCGCTAGAGTCCCGGAGAGGTTGGTGGAACTCTCGGTGTAGAGGTGAAAT  
TCGTAGATATCGAGAAGAACACCGGTGGCGAAGGCGGCCAACTGGACGGTGAAGTACGCT  
GAGACGCGAAAGCGTGGGGAGCAAACAGGATTAGATACCCTTGTAGTCC

>Otu18775

CCAGCCTATGGGATGCAGCAGTAGGGAATATTGCGCAATGGAGGAAACTCTGACGCAGCG  
ACGCCGCGTGAGTGATGAAGGCCTTAGGGTCGTAAAGCTCTGTTGTACGGGAAGAAAAAA  
ATGACGGTACCGTGCAAGAAAGGACCGGCGAACTTCGTGCCAGCAGCCGCGGTAAGACGA  
GGGTCCGAGCGTTGTTTCGGAATTATTGGGCGTAAAGCGTGTGTAGGTGGCTTTATAAGT  
CAAGTGTGAAAGCCCCGGGCTCAACCCGGGAAGTGCATCTGATACTGCAAAGCTTGAGTA  
CTGGAGAGGGTAGTGGAATTCCCTGGTGTAGTGGTGAAATACGTAGATATCAGGAGGAACA  
CCGGTGGCGAAGGCGGCTACCTGGCCATGTACTGACGCTGAGACACGAAAGCGTGGGGAT  
CAAACAGGATTAGAGACCCGAGTAGTCC

>Otu18807

CCAGCCTACGGGTGGCACCAGTCGAGAATCATTCGCAATGGGCGCAAGCCTGACGATGCG  
ACGCCGCGTGATCGAAGAAGGCCTTCGGGTGTAAAGATCTTTCGAGTGGGAACAAGGCA  
TGAGCCGTAATATGGTTTATGCTTGAGGGTACCACTAGAAGAAGCACCGGCTAACTACGT  
GCCAGCAGCTGCGGTAATACGTAGGGTGCAAGCATTAATCGGAATAATTGGGCGTAAAGG  
ACGCGTAGGCTGTTTTAAAAAGTCTGATGTGAAATTACGGGGCTTACCCCTCGTAACGGCAT  
TGGAACCTCTTAACTCGAGGACGGAAGGGGAAAGCGGAATTCATGTGTAGCGGTGAAA  
TGCGTAGATATATGGAAGAACACCGGTGGCGAAAGCGGCTTTCTGGTACGTACCTGACGC  
TGAGGCGTGAGAGCAAGGGGAGCAAACAGGATTAGAGACCCGCGTAGTCC

>Otu18814

CCAGCCTACGGGGCGCTGCAGTAAGGGATATTGCGCAATGGGCGAAAGCCTGACGCAGCA  
ACGCCGCGTGGGTGATGAAGTCTTCGGATCGTAAACCCCTGTCGTCAGGGACGAAGGTT  
GGGTGTTAATAGCATCTTGCTTGACGGTACCTGGAGAGGAAGCCCCGGCTAACTCTGT  
GCCAGCAGCCGCGTAATACAGAGGGGGCAAGCGTTATTTCGGAATTACTGGGCGTAAAGG  
GCGCGTAGGCGGTTGTTTAAAGTCAGATGTGTAATCCCCGAGCTTAACTTGGGAAGTGCAT  
CTGAGACTGGAGAGCTAGAGTACTGGAGAGGGTGGTAGAATTCACGTGTAGCGGTGAAA  
TGCGTAGAGATGTGGAGGAATACAGTGGCGAAGGCGGCCACCTGGACAGTAAGTACGC  
TGAGGCGCGAAAGTGTGGGTAGCAAACAGGATTAGATACCCTAGTAGTCC

>Otu18833

CCAGCCTATGGGTGGCACCAGTCGAGGATTTTTCTCAATGGGGGAAACCCTGAAGGAGCG  
ACGCCGCGTGGGGGATGAAGTCTTCGGATTGTAAACCCCTGTCATCCGGGAACAATGCT  
CCGCACCCAACACGTGCGGAGTTGATAGTACTGGAAGAGGAAGCCGTGGCTAACTCTGTG  
CCAGCAGCCGCGTAATACAGAGACGGCGAGCGTTGTTTCGGAATTCATTGGGCGTAAAGG  
TGCGCAGGCGGTGCGCTAAGTCGGATGTGAAATCTCACAGCCTAACTGTGAGCGGTGATT  
CGAAACTTGCCGGCTCGAGGACTGGAGAGGAGACTGGAATAGTCGGTGTAGCGGTGAAAT  
GCGTAGAGATCGACTAGAACACCGGTGGCGAAGGCGGGTCTCTGGACAGTTCCTGACGCT  
GAGGCACGAAAGCGTGGGGATCGAACGGGATTAGATACCCTAGTAGTCC

>Otu18834

CCAGCCTACGGGAGGCAGCAGTGAGGAATATTGGTCAATGGACGGAAGTCTGAACCAGCC  
ATCCCGCGTGCAAGGAAGAAGGCGCTATGCGTTGTAAACTGCTTTTCCGAGGGAAGAAAAAC  
CCCCGACGCGTCGGGGCTTGCGGCTACCTTGGGAATAAGCATCGGCTAACTCCGTGCCAG  
CAGCCGCGGTAATACGGAGGATGCGAGCGTTATCCGGATTCATTGGGTTTAAAGGGAGCG  
TAGGTGGACTTATAAGTCAGTGGTGAAATCTTTGGGCTTAACCCAAAAATTGCCATTGAT  
ACTGTAGGTCTTGAGTACAGTTGCTGTGGGCGGAATATGACATGTAGTGGTGAAATACAT  
AGAGATGTCATAGAACACCGATTGCGAAGGCAGCTCACAAAGCTGTAAGTACACTGAGG  
CTCGAAAGTGCGGGGATCAAACAGGATTAGAAACCCAGTAGTCC

>Otu18843



CCAGCCTATGGGTGGCAGCAGTCGAGAATATTCCACAATGGGCGAAAGCCTGATGGAGCG  
ACGCCGCGTGATCGAAGAACTCTTCGGAGCGTAAAGATCTTTTCTCTGGGATGAACTTT  
TAGTGACAGTACCAGAGGAATAAGGGGGTGCAAATTCTGTGCCAGCAGCCGCGGTAATAC  
AGAACCCCCAAGCGTTATCCGGATTTATTGGGCGTGAAGAGTTCGTAGGTGGTTTATTAA  
GTTTTTTGTTAAAATCCAGAGCTTAACCTTTGGGGATGCGAAAAATACTGATAGACTTGAG  
GGCGTTAGGGGCTGATGGAACCGACGGTGTAGGGGTGAAATCCGTTGATATCGTCGGGAA  
CACCAAAAGCGAAGGCATTACAGCTGGGACGACCCTGACACTGAAGAACGAAAGCGTGGGT  
AGCAAAAAGGATTAGATACCCGTGTAGTCC

>Otu18850

CCAGCCTATGGGGGGCTGCAGGGAATATTGGTAATCTACGAAAGTGGGAACCAGCAACGC  
CGCGTGTGCGATGAAGGCCTTCGGGTGCTAAAGCACTTTTCGAGGGGATGAGGAAGGACA  
GTACCCTCGGAATAAGTCTCGGCTAACTACGTGCCAGCAGCCGCGGTAAAACGTAGGAGG  
CGAGCGTTATCCGGATTTACTGGGCGTAAAGCGCGTGTAGGCGGTTTGGTAAGTTGGATG  
TGAAAGCTCCTGGCTTAACTAGGAGAGGTCTTCAATACTGCCGAAGTAGAGGATGGTAG  
AGGAAGGTGGAATTCCGGGTGTAGTGGTGAAATGCGTAGATATCCGGAGGAACACCACTG  
GCGAAAGCGGCCCTTCTAGACCATTTCTGACGCTCAGACGCGAAAGCGTGGGGAGCAAACA  
GGATTAGAAACCCTAGTAGTCT

>Otu18864

CCAGCCTATGGGGGGCTCCAGTCGAGGATCTTCGGCAATGGGCGCAAGCCTGACCGAGCG  
ACGCCGCGTGTGCGATGAAGGCCTTCGGGTGTAAAGCACTGTGAGGGGGAGGAAAGCG  
CAAGCTTGACCTATCCCTGGAGGAAGCACGGGCTAAGTTCGTGCCAGCAGCCGCGGTAAG  
ACGAACCGTGCGAACGTTGTTTCGGAATCACTGGGCTTAAAGGGCGCGTAGGCGGAACACC  
AAGTCCGGGGTGAAAGCCCCCAGCTTAACTGGGGAAGTGCCTTGGATACTGGTGCTCTGG  
AGGGAGGTAGGGGACAGTTGGAACCTCCGGTGGAGCGGTGAAATGCGTTGATATCGGAAGG  
AACGCCGCTGGCGAAAGCGAACTGCTGGACCTTTTCTGACGCTGAGGCGCGAAAGCGTGG  
GTAGCAAACAGGATTAGAAACCCTGGTAGTCC

>Otu18872

CAGCCTATGGGGGGCACCAGTTTCGAATCATTCACAATGGGCGAAAGCCTGATGGTGCGA  
CGCCGCGTGAGTGATGAAGGCCTTCGGGTGTAAAGCTCTGTGGAGGGGGACGAACAAGT  
GCCGGCCAATACCCGGCGCGATGACGGTACCCCTTTAGCAAGCACCGGCTAACTCTGTGC  
CAGCAGCCGCGGTAAGACAGAGGGTGCAAACGTTGTTTCGGAATTACTGGGCGTAAAGCGC  
GTGTAGGCTGCTCGACGTGTCGGGTGTGAAAGCCCTGGGCTCAACCTAGGAAGTGCACCC  
GAAACTGCCGAGCTGGAGTTCTGGAGAGGAAGGCGGAATTCTCGGTGTAGAGGTGAAATT  
CGTAGATATCGAGAGGAACATCGGTGGCGAAGGCGGCCTTCTGGACAGCAACTGACGCTG  
AGACGCGAAAGCGTGGGGAGCAAACAGGATTAGAGACCCCGTAGTCC

>Otu18873

CCAGCCTATGGGGGGCACCAGTCGAGAATTTTTCTCAATGGGCGAAAGCCTGAAGGAGCG  
ACGCCGCGTGGGGGATGAATGGCTTCGGATTGTAAACTGCTTTTATATGTGACGATTATG  
ACGGTAGCATATGAATAAGGATCGGCTAACTCCGTGCCAGCAGCCGCGGTCATACGGAGG  
ATCCAAGCGTTATCCGGAATTACTGGGCGTAAAGAGTTGCGTAGGTGGCATAGTAAGTCA  
GTAGTGAAAGCGTGTGGCTCAACCACATACATTACTGAAACTGCTAAGCTAGAGGATG  
AGAGAGGTTATTGGAATTCCCAGTGTAGGAGTGAAATCCGTAGATATTGGGAGGAACACC  
GATGGCGTAGGCAGATAACTGGCTCATTCCTGACACTAAGGCACGAAAGCGTGGGTAGCA  
AACGGGATTAGATACCCAGTAGTCC

>Otu18874

CCAGCCTACGGGGGGCAGCAGTGAGGAATATTGCGCAATGGGCGAAAGCCTGACGCAGCG  
ACGCCGCGGGGGGATGAAGGTCTTCGGATTGTAAACTCCTGTTAAGAGTGAAAAAACC  
TCGCAAGTAATATGTGCGGGGCATGATGGTATCTCTAAAGAAAGCACCGGCTAACTTCGT  
GCCAGCAGCCGCGGTAATACGAAGGGTGCGAGCGTTATTCGCAATAATTGGGCGTAAAGA  
GTGCGTAGGCGGCGCGTTAAGTCTATTGTTAAATCCTCTAGCCTAACTGGAGAAATGCAA  
TGGAAGTGGCGTGCTAGAGGGTGGGAGAGAGAAGTGGAATTCTCGGAGTAGCGGTAAAA  
TGCTTAGATCTCGAGAGGAACACCGATGGCGAAGGCAGCTTCTTGGTCCATTCTGACGC  
TGAGGTACGAAAGCGTGGGGAGCAAACAGGATTAGAAACCCTCGTAGTCC

>Otu18876

CCAGCCTACGGGTCGCTGCAGCGGGGAATCTTGCAATGGGCGAAAGCCTGATGCAGCA  
ATGCCGCGTGAGTGATGAAGGCCTTCGGGTGTAAATCTCTGTGCGGCTGGGACAAATGTG  
TTTCTATCTAACAAATAGAGACAGTGATGGTACCAGCAAAGGAAGAGGCGGCTAACTCTG  
TGCCAGCAGCCGCGGTAATACAGAGGCCTCGAGCGTTGTTTCGGAATTACTGGGCGTAAAG

GGAATGTAGGCGGTAACGTAAGTCAGATGTGAAAGCCCTGGGCTTAACCCGGGAAGTGCA  
TTTGATACTGCGTTGCTAGAGTGCGAGAGAGGAAAGTGGAATCCCAGTGTAGGGGTGAA  
ATCCGTAGATATTGGGAGGAATACCGATGGCGAAGGCAGCTTTCTGGCTCGTAACTGACG  
CTGAGATTGCAAAGCGTGGGTAGCAAACAGGATTAGAAACCCCGTAGTCC

>Otu18878

CCAGCCTACGGGGCGCTGCAGTGGGGAATATTGGACAATGGGCGCAAGCCTGATCCAGCC  
ATGCCGCGTGAGTGATGACGGCCTTAGGGTTGTAAAGCTCTTTTGGCGGGGACGATGATG  
ACGGTACCCGCAGAATAAGCCCCGGCTAACTTCGTGCCAGCAGCCGCTGTAAGACGAAGG  
GGGCTAGCGTTGTTTCGGAATTACTGGGCGTAAAGCGTGTGTAGGTGGTTGCCCAAGTTGG  
ATGTGAAAGCCTTGAGCTCAACTCAAGAAATGCATTTCAGGACTGGGTGACTAGAGGACCG  
GAGAGGATAGTGGAATTCAGTGTAGTGGTGAAATTCGTAGATATTGGAAGAACACCG  
GTGGCGAAGGCGGCAACCTGGTCTTCTACTGACGCTGAGGCGCGAAAGCGTGGGGAGCAA  
ACAGGATTAGAAACCCCGTAGTCC

>Otu18883

CCAGCCTATGGGTGCGCAGCAGTATGCAAGTGTACCCCTAAATCCATCAGGGGGTTCGCCT  
ACTGTGGCCATTTCCCAATCCAAAACACCAATAATTTTCAGCCAGGTTATCCGGATTTCAGT  
ATTACGTTATCATATTTGTAATCGTTATGTATAAAAGCAGCCTTTTGCTCCGCCGGTAAA  
TTGTTTTTCAACCAACCAGCCATTTTATCGAGGCTGTCAATCCTATCTGTTTCTGAATGA  
TAATATCGTTTTATCCATCCTTCAACCTGCCGCTGTACATATCCTTCTGGTTTTTCCCAAT  
TGTATTAAACCGGTGGCATCAATATCCAGTGCCTGTAAAGTTACCAGGTATCTATTAGT  
GCAATTGAACCTTTTTTGTAAGTTTCCGGCGCCAACCTGCATTTTGGGTGCATTAGAGACC  
CCTGTAGTCC

>Otu18892

CCAGCCTATGGGTTGCAGCAGTGGGGAATATTGCACAATGGGCGAAAGCCTGATGCAGCG  
ACGCCGCGTGAGGAAGACGGTCTTCGGATTGTAACTCCTGTAAAGTGGGAAGAAAGAT  
TCAGTGTTAATACCACTGGAGGATGACGGTACCACTAGAGAAAGCCCCGGCTAACTTCGT  
GCCAGCAGCCGCGTAATACGAAGGGGGCGAGCGTTATTCGGAATTACTGGGCGTAAAGG  
ACGCGTAGGCGGTTTGCTAAGTCAGCTGTTAAATTTTCAGGGCCTAACCTGAGTCAGCAG  
ATGATACTGGCGGAAGTAGAGTATGGAAGAGAGAAGTGGAATTCCTCGGAGTAGCGGTAAA  
ATGCGTAGATCTCGAGAGGAACACCGATGGCGAAAGCAGCTTCTTGGTCCATAACTGACG  
CTGAGGCGTGAAAGCGTGGGGAGCAAACAGGATTAGAAACCCCGTAGTCC

>Otu18894

CCAGCCTACGGGGGGCACCAGTGGGGAATATTGGACAATGGGCGCAAGCCTGATCCAGCC  
ATGCCGCGTGAGTGATGAAGGCCTTAGGGTTGTAAAGCTCTTTTACCAGGGAAGATGATG  
ACGGTACCTGGAGAATAAGCACCGGCTAACTTCGTGCCAGCAGCCGCGTAATACGAAGG  
GTGCTAGCGTTGTTTCGGAATTACTGGGCGTAAAGCGCGCTAGGCGGCTTGACAAGTCAG  
GGGTGAAATCCTGGGGCTTAACCCAGAAATGCCTTTGAACTGTCAGGCTTGAGTATCG  
GAGGGGAGTGCGGAATTGCTAATGTAGAGGTGAAATTCGTAGATATTAGCAGGAACACCG  
GTGGCGAAGGCGGCACTCTGGACGATAACTGACGCTGAGGCGCGAAAGCGTGGGGATCAA  
ACAGGATTAGATACCCGCGTAGTCC

>Otu18895

CCAGCCTATGGGGCGCACCAGTGGGGAATATTGCACAATGGGCGAAAGCCTGATGCAGCG  
ACGCCGCGTGAGGATGAAGGTTTTTCGGATTGTAACTCCTGTAAAGTGGGAAGAAAGAG  
CAGCATCTAATACATGCTGTAGATGACGGTACCACTAGAGAAAGCACCGGCAAACCTTCGT  
GCCAGCAGCCGCGTAATACGAAGGGTGCTAGCGTTATTCGGAATTACTGGGCGTAAAGA  
GCGTGTAGGCGGCTATTAAAGTCATTTGTAAATCTCTCGGCTCAACCGGGTAAAGGCGG  
ATGATACTGATGGACTAGAGGGTAAGAGAGAGAAGCGGAATTCCTCGGAGTAGCGGTAAAA  
TGCGTAGATCTCGAGAGGAACACCGGTGGCGAAGGCGGCTTCTTGGCTATTTCTGACGC  
TAAAGCGCGAAAGCGTGGGGAGCAAACAGGATTAGAAACCCCTTGTAGTCC

>Otu18901

CCAGCCTACGGGGCGCAGCAGTGGAGAATATTGGTCAATATGCGAAAGCATGAACCAGCG  
CTTTGCGGAGATGATAGATTTTCTTAAATCATGAAGACTATGACAGTTGTAAAGTTTG  
TGCGCAAACCAAAAAAAGTATATTGTGTTTGAAGAGAACCCCGGGCCAACAACGTGCCAG  
CAGCTGCGGTAAGACGTTGACGGGGGAGCGTTACTGGCCGTCCTAGGCGTAAAGAATGG  
CTAGACAGTCTAAGATTTTATAAAAAAATAAAAGGGTGAGCGGAATTCGTTATAAAACC  
TTAGTACTAAAAATAAAAGAGATTGGCGATGAGTATAGTTTAGAGATAAAATGCAAAAA  
GACTATAAGAATCTTCTAGAGCCGCGGCAGCCTTTCATTTTTATTTTATGTCAAATCAT  
AAAGCATGAGGATCAATCAGGATTAGAACCCGAGTAGTCC

>Otu18918

GGACTACGGGGGTCTCTAATCCTGTTTGCTCCCCACGCTTTCGCACATGAACGTCAGTAT  
TCGACCAGGAAGTCGCTTTTCGCCACTGGTGTTCCTTCCGATATCTACGCATTTACCCGCT  
ACACCGGAAATTCACCTTCCCTCTTCGATACTCTAGCCATGCAGTCTCAAATGCAGTTCC  
CAGGTTGAGCCCGGGGATTTACATCTGACTTACAAAACCGTCTACGCGCGCTTTACGCC  
CAGTAATTCGGATTAACGCTCGCACCCCTCTGTATTACCGCGGCTGCTGGCACGAAGTTAG  
CCGGGGCTTCTTCTCACGCTACCGTCATCATCGTCGCGTGCGAAAGAGCTTTACAACCCT  
AAGACCTTCTTACACACGCGGCATTGCTGGATCAGGCTTGCGCCCATTTGTCCAATATTC  
CCCACTGCTGCGACCCATAGGCTGG

>Otu18933

CCAGCCTATGGGGGGCAGCAGTCGAGAATCTTCCACAATGGACGAAAGTCTGATGCAGCG  
ACGCCGCGTGAGGATGACGGTCTTCGGATTGTAACTCCTGTAAAGTGTGAAAAAGAC  
TCATTTTTTAATAGAAATGAGGGATGATGGTAACACTAGAGAAAGCACCGGCTAACTTCGT  
GCCAGCAGCCGCGTAATACGAGGGGTGCAAACGTTATTCGGAATCACTGGGCGTAAAGG  
GTGCGTAGACGGCGAAATAAGTCGATCATTAAATCTCCTGGCTTAACTAGGAGTCCGTGA  
TCGAAACTGATTTCGCTTGAGGATGGAAGAGAGAAGTGGAATTCTCGGAGTAGCGGTAAAA  
TGCGTAGATCTCGAGAGGAACACCGATGGCGAAGGCAGCTTCTTGGTCCATTTCTGACGT  
TGAGGCACGAAAGCGTGGGGAGCAAACAGGATTAGATACCCCCGTAGTCC

>Otu18939

CCAGCCTATGGGATGCACCAGTGGGGAATATTGGACAATGGGCGCAAGCCTGATCCAGCA  
ATGCCGCGTGAAATGATGAAGGCCTTCGGGTGTAAAGTCTTTTCGACGGGGACGATGATG  
ACGGTACCCGTAGAAGAAGCCCCGGCTAACTTCGTGCCAGCAGCCGCGGTAATACGAAGG  
ATGCAGGCGTTATCCGGATTTATTGGGTTTAAAGGGTGCGTAGGCGGACTTATAAGTCAG  
TGGTGAAATCTCGATGCTTAACATCGAACGTGCCATTGATACTGTAGGTCTTGAGTACAG  
ATGCCGTTGGCGGAATGTGTTCATGTAGCGGTGAAATGCATAGATATGACACAGAACACCG  
ATTGCGAAGGCAGCTGACGAACTGTAACCTGACGCTGAGGCACGAAAGCGTGGGGATCAA  
ACAGGATTAGATACCCCTGTAGTCC

>Otu18957

CCAGCCTATGGGACGCAGCAGTGGGGAATCTTGGACAATGGGCGCAAGCCTGATCCAGCC  
ATGCCGCGTGAGTGATGAAGGCCTTAGGGTTGTAAACTCTTTTCGCCGAGGACGATAATG  
ACGGTACTCGGAGAAGAAGCTCCGGCTAACTTCGTGCCAGCAGCCGCGGTAATACGAAGG  
GGGCTAGCGTTGTTTCGGATTTACTGGGCGTAAAGCGCGTG TAGGCGGGTCGTTAAGTTGG  
GGGTGAAATCCCGGAGCTCAACTCCGGAACGCTTCAAACCTGGCGACCTGGAGCGAGA  
TAGAGGCAAGTGGAATTCGAGTGTAGAGGTGAAATTCGTAGATATTTCGAGGAACACCA  
GTGGCGAAGGCGACTTGCTGGATCTCTGCTGACGCTGAGACGCGAAAGCGTGGGGAGCAA  
ACAGGATTAGATACCCCAAGTAGTCC

>Otu18959

CCAGCCTATGGGCTGCAGTGAGGAATATTGGTCAATGGACGAGAGTCTGAACCAGCCATG  
CCGCGTGAAAGGATGAAGGCGTCTGCGTTGTAAACTTCTTTTATCTGGGAAGAAACCTAC  
CTTTTCTAAGGTAGCCGACGGTACCAGAGGAATAAGCACCGGCTAACTCCGTGCCAGCAG  
CCGCGGTAATACGAGGGGTGCAAGCGTTATCCGGATTCACTGGGTTTAAAGGGTGTGTAG  
GCGGGTATTTAAGTCAGTGGTGAATCTCCGAGCTCAACTCGGAAACTGCCATTGATACT  
ATTTATCTTGAATATTGTTGAGGTAGGCGGAATATGTCATGTAGCGGTGAAATGCTTAGA  
TATGACATAGAACACCGATTGCGAAGGCAGCTTGCTAAACAATTATTGACGCTGAGGCAC  
GAAAGCGTGGGGATCAAACAGGATTAGAAACCCGTGTAGTCC

>Otu18967

CCAGCCTATGGGTGCACCAGTCGAGAATAATTCGCAATGGACGAAAGTCTGACGATGCGA  
CGCCGCGTGAAACGATGAAGGCCTTCGGGTGTAACTTCTGTTGCCTTGGAACAAGAGTA  
GTCATCTAATAGGTGGCTACAATGAGGGTACAAGGAGAGGAAGCACCGGCTAATTCGGTG  
CCAGCAGCTGCGGTAATACGGAAGGTGCAAGCGTTAGTCGGAATTACTGGGCGTAAAGGG  
TGCGTAGGCGGCGATATAAGTCGGTTCGTGAAATTCGGGGCTCAACCTCGGAGCTGCGAA  
CGATACTGTATTGCTTGAGGAATGGCGGAGAAAATGGAATTCATATGTAGCGGTGAAAT  
GCGTAGATATATGGAAGAACACCTGTGGCGAAAGCGGTTTCTAGCCTTCTCCTGACGCT  
GAGGCACGAAAGCAAGGGGAGCAAACAGGATTAGAGACCCCAGTAGTCC

>Otu18972

CCAGCCTATGGGTGGCACCAGTGGGGAATCTTGCACAATGGTGGCAACACTGATCCAGCC  
ATGCCGCGTGAGGATGAAGGCGCTACGCGTTGTAACTGCTTTTGTACCAGAGAAAACC  
TATCTACGTGTAGATAGCTGATAGTATGGTAAGAATAAGCATCGGCTAACTTCGTGCCAG

CAGCCGCGGTAATACGAAGGATGCAAGCGTTATCCGGATTTATTGGGTTTAAAGGGTGCG  
TAGGCGGACTTATAAGTCAGTGGTGAAATCTCGTCGCTTAACGACGAACGTGCCATTGAT  
ACTGTAGGTCTTGAGTACAGATGCCGTTGGCGGAATGTGTTCATGTAGCGGTGAAATGCGT  
AGATATCAGGAGGAACACCTGTGGCGAAGGCGGCTCACTGGACCATAACTGACGCTGATG  
CACGAAAGCTAGGGGAGCAAACAGGATTAGAAACCCTCGTAGTCC

>Otu18973

CCAGCCTATGGGGTGCTCCAGTCGAGGATCTTTCGGCAATGGGCGCAAGCCTGACCGAGCG  
ACGCCGCGTGTGCGATGAAGGCCTTCGGGTGTAAAGCACTGTCGAGGGGGAGAAAGCCC  
GCAAGGGTTGATCGACCTCTGGAGGAAGCACGGGCTAAGTTCGTGCCAGCAGCCGCGGTA  
AGACGAACCGTGCGAACGTTGTTTCGGAATCACTGGGCTTAAAGGGCGCGTAGGCGGGTTA  
TCAAGTCAGGGGTGAAAGCCCACGGCCCAACCGTGGAAGTGCCTTTGATACTGGTAGTCT  
TGAGGGAGGTAGGGGCGTGCGGAACCTCCGGTGGAGCGGTGAAATGCGTAGATATCGGAA  
GGAACACCGATGGCGAAAGCAGCGCGCTGGACCTCTTCTGACGCTGAGGCGCGAAAGCCA  
GGGGAGCAAACGGGATTAGATACCCCCGTAGTCC

>Otu18979

CCAGCCTACGGGAGGCTGCAGTAACGAATATTCCACAATGCGCGAAAGCGTGATGGAGCA  
ATGCCGCGTGCGGGATGAAGCGCTTTTTGCGTGTAACCGCTGTCAGAAGATAGAAACAT  
TGATCATCTTCAGAGGAAGGGGCGACTAACTCTGTGCCAGCAGTCGCGGTAATACAGAGG  
CCCCGAGCGTTAGTCGGAATCACTGGGCTTAAAGGGTGCGTAGGCGGATCGGTAAGTGCA  
ATGTGAAAGCCCCCGGCTCAACCGGGGAACCGCAGGGCATACTGCCGATCTTGAGGAAGC  
TAGAGGCCGGCGGAACGATAGGTGGAGCGGTGGAATGCGTAGAGATCTATCGGAACGCCA  
ATGGTGAAGACAGCCGGCTGGGGCTTTCTGACGCTGAGGCACGAAAGCGTGGGGAGCAA  
ACAGGATTAGATACCCTAGTAGTCC

>Otu18990

CCAGCCTACGGGTGTCACCAGTGGGGAATCTTCCACAATGGGCGCAAGCCTGATGGAGCA  
ACGCCGCGTGAGTGATGAAGGCCTTCGGGTGTAAACTCTGTCTTGTGAGAATAAGGCT  
GCAGGGTAAATAATCCTGCAGCTTGACTGTATCACAGGAGGAAGACACGGCTAACTCTGT  
GCCAGCAGCCGCGGTAATACAGAGGTGTCAAGCGTTGTCCGGAATTACTGGGCGTAAAGG  
GTGCGTAGGTGGGCGAGTAAGTCTGATGTGAAATCACTCAGCTTAACTGAGTAACTGCAT  
TAGAAACTGCTTGTCTTGAGTGCAGAAGAGGAGAGTGGAATTTCCAGTGATAGCGGTGAAA  
TGCGTAGATATTGGGAGGAACACCAGTGCGGAAGGCGGCTCTCTGGTCTGCAACTGACAC  
TGAAGCACGAAAGCTAGGGGAGCAAACGGGATTAGAAACCCGCGTAGTCC

>Otu19017

CCAGCCTATGGGTTGCAGCAGTAACGAATCTTCCGCAATGTACGCAAGTATGACGGAGCG  
ACGCCGCGTGTAGGATGAAGCCCTTCGGGTGTAAACTACTGTGAGGGGATAGAAAGTTC  
TGATCGTCCCCAGAGGAAGGCACGGCTAACTCTGTGCCAGCAGCCGCGGTAAGACAGAGG  
TGCCAAGCGTTAGGCGGAATCACTGGGCTTAAAGCGTGTGTAGGCGGATTCCTAAGTACC  
TTGTGAAATCCCACGGCTCAACCGTGGAAGTCTGGGTATACTGGGTGTCTTGAGCCAAC  
TAGGGGCAGCCGGAACAAATGGTGGAGCGGTGAAATGCGTAGATATCATTTGGAACGCCA  
ATGGCGAAAACAGGCTGCTGGGGTTGTGCTGACGCTGAGACACGAAAGCCAGGGGAGCAA  
ACGGGATTAGAGACCCCGGTAGTCC

>Otu19022

CAGCCTATGGGGTGACGAGTAGGGAATATTGCGCAATGGAGGAAACTCTGACGCAGCGA  
CGCCGCGTGAGGATGAAGGCCTTCGGGTGTAACCTCCTGTGCGGAAGGACGAAAGCTT  
TGGTGCTAACATCGCCAAAGTTTGACGGTACCTTTAAAGGAAGCGCCGGCTAACTACGTG  
CCAGCAGCCGCGGTAATACGTAGGGCGCAAGCGTTGTTTCGGAATCATTGGGCGTAAAGCG  
CGTGTAGGTGGTCATATAAGTCGAGTGTGAAATCCCTGGGCTCAACCGAGGAAGTGCAT  
CGAAACTGTACGACTAGAGGACAGTAGAGGAAGGTGGAATTCCTAGTGAGAGGTGAAAT  
TCGTAGATATTAGGAGGAATACCAGTGGCGAAGGCGACCTTCTGGGCTGTAAGTACACT  
GAGACGCGAAAGCATGGGTAGCAAACAGGATTAGAGACCCGCGTAGTCC

>Otu19032

CCAGCCTACGGGAGGCACCAGTGGGGAATCTTGACAATGGGGGAAACCCTGATCCAGCC  
ATGCCGCGTGCGGGAAGAAGGCCTTCGGGTGTAAACCGCTTTCGGCCGGGACGAAATCG  
CAACGATTAATACTCGGTGTGGATGACGGTACCGGAAGAAGAAGCACCGGCTAACTACGT  
GCCAGCAGCCGCGGTAATACGTAGGGTGCGAGCGTTAATCGGAATTACTGGGCGTAAAGC  
GTGCGCAGGTGGTCCATAAGCTAGAGCTGAAATCCCCGGGCTTAACCTGGGAAGTGGCT  
TTAGGACTGTGGGGCTAGAGTGTGGCAGAGGGAAGTGGGAATTCACGCTGTAGCAGTGAAA  
TGCGTAGAAATGTGGAGGAACACCGATGGCGAAGGCAGGTTCTGGGCTGACACTGACAC

TCATGCACGAAAAGCGTGGGGAGCAAACAGGATTAGATAACCCGCGTAGTCC

>Otu19034

CCAGCCTATGGGAGGCACCAGTGGGGAATTTTCCGCAATGGGCGAAAGCCTGACGGAGCG  
ACGCCGCGTGTGGGAAGAAGGCCTTCGGGTCGTAAACCACTGTCGAAGGGGAAGATATTG  
ACGGTACCCTTGGAGGAAGCCCCGGCTAACTACGTGCCAGCAGCCGCGGTAAGACGTAGG  
GGGCAAGCGTTATTTCGGAATTATTGGGCGTAAAGCGCTCGTAGGCGGGACAGGAAGTCTG  
TGTTGAAAGACCTCGGCTCAACTGAGGGACCGGCGCGGATACTCTTGTTCTTGAGTCATT  
CAGAGGATGATGGAATTCCCGGTGTAGCGGTGAAATGCGTAGATATCGGGAGGAACACCA  
GTGGCGAAGGCGATCATCTGGGGATGTTCTGACGCTGAAGAGCGAAAGCTAGGGGAGCAA  
ACGGGATTAGATAACCCTGGTAGTCC

>Otu19043

CCAGCCTATGGGAGGCACCAGTAGGGAATATTGGTCAATGGGCGAAAGCCTGAACCAGCC  
ATCCCGCGTGTGGGAAGAAGGAGCTCAGCTTCGTAAACCACTTTTGTGCGAGAAAAAAAT  
CCGGTCGCCGGAATTGATGGTACTCGACGAATAAGCGCCGGCCAACTACGTGCCAGCAGC  
CGCGGTAATACGTAGGGCGCGAGCGTTACCCGGAATCACTGGGCTTAAAGGGTGCGCAGG  
CGGACTGGTAAGTCGGAGGTGAAAGCTCCCCGCTCAACGGGGAATCCGCCCCCGATACTA  
TTAGTCTAGAATATGGTCGATGTTTACGGAACGCGGGGAGTAGCGGTGAAATGCGTAGAG  
TTCCCGTGGAACGCCGGTAGCGAAGGCGGTGAACAAGGCCAGTATTGACGCTCGGGCACG  
AAAGCGTGGGGAGCAAACAGGATTAGAGACCCGAGTAGTCC

>Otu19045

CAGCCTATGGGGCGCTGCAGTAACGAATCTTCCGCAATGCACGAAAGTGTGACGGAGCGA  
CGCCGCGTGTGGGACGAAGTCCTTCGGGATGTAAACCACTGTCAGGGGTACCAAGTTCT  
GAGGAGCCCCAGAGGAAGGGACGGCTAACTCTGTGCCAGCAGCCGCGGTAATACAGAGGT  
CCCGAGCGTTGTTTCGGATTCACTGGGCGTAAAGGGTGCGTAGGCGGTTCGGGTAAGTCTGA  
CGTGAATCTCCGGGCCTAACCCGAAACTGCGTCGGATACTATCCGGCTAGAGGATTGG  
AAGGGAGACTGGAATACTTGGTGTAGCAGTGAATGCGTAGATATCAAGTGGAACACCAG  
TGGCGAAGGCGAGTCTCTGGACAATTCTGACGCTGAGGAGCGAAAGCGTGGGGAGCGAA  
CAGGATTAGAGACCCGGGTAGTCC

>Otu19055

CCAGCCTACGGGGCGCTGCAGTCGAGAATCTTCCACAATGGACGAAAGTCTGATGGAGCG  
ACGCCGCGTGATTGATGAAGTCCCTTTGGGACGTAAAGACCTTTTATGAGGGAAGAAGTT  
TATTGACTGTACCTCATGAATAAGAGGCTCCTAATCTCGTGCCAGCAGGAGCGGTAATAC  
GAGAGCCTCGAGCGTTATCCGGAATTATTGGGCGTAAAGGGTGTGTAGGTTGTTCTGTTA  
GTCTTTTGTAAAGCCCCGGGCTTAACCTGGGAAGGGCGAAAGATACGGCAGAACTAGAA  
AGTGCGAGAGGTTTGCGGAACCTCATGGTGTAGGGGTGAAATCCGTTGATATCATGGGGAA  
CACCAAAAGCGAAAGCAGCAAACTAGCGCATATTTGACACTGAAACACGAAAGCGTGGGT  
AGCGAATGGGATTAGTACCCCAGTAGTCC

>Otu19059

CCAGCCTACGGGGGGCAGCAGTGGGGAATCTTGCGCAGTGGGCGAAAGCCTGACGCAGCA  
ACGCCGCGTGTGTGATGAAGGTCTTCGGATCGTAAAGCACTGTCGCGAGGGAAGAGATGT  
CAACTTCTAACAAGGTTGACTACGACGGTACCTCGAGAGGAAGCACCGGCTAACTCTGT  
GCCAGCAGCCGCGGTAATACAGAGGGTGCGAGCGTTGTTTCGGAATTATTGGGCGTAAAGC  
GCTTGTAGGCGGTTGGATAAGTCTCGTGTGAAATCCCTTGGCTCAACCAAGGAAGTGCAC  
GAGATACTGTTTAACTTGAGTGCCGAGAGGGTTCGCGGAATTCCTGGTGTAGAGGTGAAA  
TTCGTAGATATCGGGAGGAACACAGTGCGAAGGCGGCGACCTGGACGGACACTGACGC  
TGAGACGCGAAAGCGTGGGGAGCAAACAGGATTAGAAACCCGTGTAGTCC

>Otu19068

CCAGCCTACGGGACGCTGCAGTCGAGGATCTTCGGCAATGGGCGCAAGCCTGACCGAGCG  
ACGCCGCGTGTGCGATGAAGGCCTTCGGGTGTAAAGCACTGTCGAGGGGGATAAAGCCG  
CAAGGTTGATTGATCCCTGGAGGAAGCACGGGCTAAGTTCGTGCCAGCAGCCGCGGTAAG  
ACGAACCGTGCGAACGTTGTTTCGGAATCACTGGGCTTAAAGGGCGCGTAGGCGGCTGGAC  
AAGTCCGGGGTGAAAGCCCCCAGCTCAACTGGGGAAGTGCTCGGATACTGTCGAGCTCG  
AGGGAGGTAGGGGCAGAGGGAACCTCTGGTGGAGCGGTGAAATGCGTTGATATCAGAAGG  
AACGCCGGTGGCGAAAGCGCTCTGCTGGACCTCTTCTGACGCTGAGGCGCGAAAGCTAGG  
GGAGCAAACGGGATTAGAGACCCGAGTAGTCC

>Otu19080

CCAACCTACGGGTTGCAGCAGCTAAGAATCTTCCGCAATGGGGGAAACCCTGACGGAGCG  
ACGTCGCGTGGGTGATGAAGGCGGAACGTTGTAAAGCCCTTTTATAGACGAGGAATAAG

CTTTGGAGGGAATGCCAGAGTGATGACGGTAGTCTGTGAATAAGCCCCGGCTAATTACGT  
GCCAGCAGCCGCGGTAACACGTATGGGGCGAGCGTTGTTTCGGAATTATTGGGCGTAAAGG  
GTATGCAGGCGGTTTGGCAAGTCTGGTGTGTAAGACCTCAGCTTAAGTGGGGGAGCGCGC  
TGGAAGTGGCAGGCTAGAATACAGGAAGGGGAGTTGGAATTCAGGTGTAGGGGTGAAA  
TCTGTAGATATCTGGAAGAACATCAGTGGCGAAGGCGAACTCCTGGCCATGTATTGACGC  
TGAGATACGAAAGCGTGGGAAGCAAACAGGATTAGATAACCCCGTAGTCA

>Otu19091

CCAGCCTACGGGGTGCAACAGTAGGGAATTTTGCACAATGGGCGCAAGCCTGATGCAGCA  
ACGCCGCGTGAGTGAAGAAGGCTCTTGGGTGTAAAGCTCTTTCGGCTGGGAAGAAGGGG  
TTGCCTGCGAACAGTTGGCGATTCTGACGGTACCAGAAGAAGAAGCACCTGCTAACTTCG  
TGCCAGCAGCAGCGGTAATACGAAGGGTGCAAGCGTTGTTTCGGAATTACTGGGCGTAAAG  
CGCGCGTAGGCGGGTTTGAAGTTCGGTTGTGAAAGCCCTGGGCTTAACCTGGGAATTGCA  
GCCGAACTTCAAATCTTGAGTGCCTGAGAGGATGGCGGAATTCCCGGTGTAGTAGTGAA  
ATACGTAGATATCGGGAAGAACACCTGAGGCGAAGGCGGCTGTCTGGTGGTGCCTGACG  
CTGATGCGCGAAAGCGTGGGGAGCAAACAGGATTAGAAACCCGTGTAGTCC

>Otu19106

CCAGCCTATGGGTGCTGTCAGTCGAGAATCTTCGGCAATGGGCGCAAGCCTGACCGAGCG  
ACGCCGCGTGAGGACGAAGGCCTTCGGGTGTAAACTCCTGTGAGGGGGGAAGAAGGGC  
CCTTAAAGCCTTGACTGATCCCTGGAGGAGGCACGGGCTAAGTTCGTGCCAGCAGCCGC  
GGTAAGACGAACCGTGCGAACGTTATTTCGGAATCACTGGGCTTAAAGCGCGTGTAGGCGG  
GCCGGCACGTCGGTCGTTGAAATCCCCCGGCTCAACCGGGGAAGTGGCGCCGATACGACC  
GGCCTGGAGGAACGTAGGGGGAGCTGGAACCTCCGGTGGAGCGGTGAAATGCGTTGAGAT  
CGGAAGGAACGCCCCTGGCGAAAGCGAGCTCCTGGACGTTTCTGACGCTGAGACGCGAG  
AGCCAGGGGAGCGAACGGGATTAGAAACCCCGGTAGTCC

>Otu19122

CCAGCCTATGGGTGGCTGTCAGTTGAGAATCTTCGGCAATGGGCGCAAGCCTGACCGAGCG  
ACGCCGCGTGAGGACGAAGGCCTTCGGGTGTAAACTCCTGTGAGGGGGGAAAAAGGTC  
CGCAAGGGCTTGATTGATCCCTGGAGGAAGCACGGGCTAAGTTCGTGCCAGCAGCCGCGG  
TAAGACGAACCGTGCGAACGTTATTTCGGAATCACTGGGCTTAAAGCGCGTGTAGGCGGGA  
TGGTACGTCGGTCGTTGAAATCCCCCGGCTCAACCGGGGAAGTGGCGCCGATACGGCCAC  
CCTTGAGGAACGTAGGGGGAACTGGAACCTCAGGTGGAGCGGTGAAATGCGTTGAGATCG  
GAAGGAACGCCCCTGGCGAAAGCGAGGTCTTGGACGTTTACTGACGCTGAGACGCGAAAG  
CCAGGGGAGCAAACGGGATTAGAAACCCCGGTAGTCC

>Otu19126

CCAGCCTATGGGGTGCTGTCAGTGGGGAATATTGGACAATGGGGGAAACCCTGATCCAGCG  
ACGCCGCGTGTTGAAGAAGGCCTGCGGGTTGTAAAGCACTTTTAGTGGGGACAAAAAGT  
CATGAATTAATACTTCGTGATCTTGATTTAACTCACAGAAAAAGCACCGGCTAACTCTGT  
GCCAGCAGCCGCGTAATACAGAGGGTGCGAGCGTTAATCGGAATTACTGGGCGTAAAGC  
GCGCGTAGACGGTTTGGTAAGTCAGATGTGAAATCCCTGGGCTCAACCTGGGAACTGCAT  
TTGTGACTGGCGGGCTAGAGTATGGCAGAGGGGGGTAGAATTCCATGTGTAGCAGTGAAA  
TGCGTAGAGATGTGGAGGAATACCGATGGCGAAGGCAGCCCCCTGGGCCAATACTGACGC  
TCATGCACGAAAGCGTGGGGAGCAAACAGGATTAGAGACCCGAGTAGTCC

>Otu19138

CCAGCCTACGGGAGGCACCAGTAGGGAATTTTACGCAATGGGCGAAAGCCTGACGTAGCG  
ACACCGCGTGAGCGAAGAAGCCCTTTGGGGTGTAAAGCTCTGTGCGCTGGAACGAAAAAA  
ATGACGGTACCAGCAGAGGAAGCATCGGCTAACTACGTGCCAGCAGCCGCGGTAAGACGT  
AGGATGCGAGCGTTGTCCGGATTTATTGGGCGTAAAGAGTTCGTAGGCGGTTTGTAAAGT  
CTGATGTTAAAGATCGGGGCTCAACCCCTGGGAGTGCATTGGATACTGGCAGACTTGAGTG  
TGGTAGAGGTAAGTGGAAATTCCTGGTGTAGCGGTGGAATGCGTAGATATCAGGAAGAACA  
CCAGTGGCGTAGGCGACTTACTGGGCCATAACTGACGCTGAGGAACGAAAGCCAGGGGAG  
CAAATGGGATTAGAGACCCGAGTAGTCC

>Otu19139

CCAGCCTATGGGTCGCAGCAGTCGAGAATCATTCGCAATGGGCGAAAGCCTGACGATGCG  
ACGCCGTGTGAGCGAAGAAGGCCTTAGGGTTGTAAAGCTCTTTCGCCTAGGAACAAGAGA  
GGTTGGCTAATATCCAAGTGAATTTGAGAGTACTAGGTAAAGAAGCACCGGCTAACTCCGT  
GCCAGCAGCTGCGGTAATACGGAGGGTGCAAGCATTAATCGGATTTATTGGGCGTAAAGG  
GCGCGTAGGCGGGGGTAATAGTCAGATGTGAAATCCCGGGGCTCAATCTCGGAACAGCAT  
TTGAAACTGGATCTCTAGAGGGTAGGCGGAGGAAACGGAATTCACAAAGTAGCGGTGAAA

TGCGTAGAGATGTGGAAGAACACCGGTGGCGAAGGCGGTTTCCTAGCTTATACCTGACGC  
TGGGGCGCGAAAGCAAGGGGATCAAACAGGATTAGAAAACCCGTGTAGTCC  
>Otu19145  
CCAGCCTACGGGGGGCTCCAGTCGAGAATCTTTCGCAATGGGCGCAAGCCTGACGAAGCG  
ACGCCGTGTGAGCGAAGAAGGCCTTCGGGTGTAAAGCTCTTTCGCTAGGGAACAAGAAA  
GTCCGGATAACACCCGGATGATTTGATGGTACTTGGTAAAGAAGCACCGGCTAACTCCGT  
GCCAGCAGCTGCGGTAATACGGAGGGTGCAAGCATTGATCGGAATTATTGGGCGTAAGGG  
CGCGTAGGCGGCCGAAAAAGTCAGATGTGAAATTCCAGGGCTCAACCCTGGAGCTGCATT  
TGAAACTTTTCGGCTAGAGTGCAATTAGGGAAAACGGAATTCACGTGTAGCGGTGAAAT  
GCGTAGATATGTGGAAGAACTGGTGGTGAAGACGGTTTCTGGGTGTAACTGACGCT  
GAGGCGCGAAAGCTAGGGGAGCAAACAGGATTAGAGACCCTTGTAGTCC  
>Otu19146  
CCAGCCTATGGGTGGCAGCAGTGGGGAATCTTGCGCAATGGGCGAAAGCCTGACGCAGCG  
ACGCCGCGTGGGTGATGAAGGCCTTCGGGTGTAAAGCCCTGTGGGGAGAGACGAATAAG  
TACTGGCTAATATCCAGCGCGATGACGGTATCTCCTTAGCAAGCACCGGCTAACTCTGTG  
CCAGCAGCCGCGGTAAGACAGAGGGTGCAAACGTTGTTTCGGAATTACTGGGCGTAAAGCG  
CGTGTAGGCGGCTATGTAAGTCGGATGTGAAAGCCCTCGGCTCAACCGAGGAAGTGCATT  
CGAAACTGCGTAGCTGGAGTCCCGGAGAGGATGGTGGAAATCTCGGTGTAGAGGTGAAAT  
TCGTAGATATCGAGAGGAACACCGGTGGCGAAGGCGGCCATCTGGACGGTGAAGTGCAT  
GAGACGCGAAAGCGTGGGGAGCAAACAGGATTAGAAAACCCCTCGTAGTCC  
>Otu19148  
CCAGCCTATGGGTGTCAGCAGTGGGGAATATTGGACAATGGGGGCAACCCTGATCCAGCA  
ATGCCGCGTGTGTGAAGAAGGCCTGAGGGTGTAAAGCACTTTCGGTAGGGAGGAGAGGC  
ACCAGACTAAGAGTTGGGTGTTGAGACGTTACCTACAGAAGAAGCACCGGCTAACTCCGT  
GCCAGCAGCCGCGGTAATACGGGGGGTGCGAGCGTTAATCGGAATTACTGGGCGTAAAGG  
GTGCGTAGGTGGTTTATTAAGTTATGTGTGAAATGCCAGGCTTAACCTGGGAATGGCAG  
ATGATACTGGTAGACTTGAGTATAGGAGAGGGTAGTGGAAATTTCCGGGTGTAGCGGTGAAA  
TGCGTAGATATCGGAAGGAACACCAAGTGGCGAAGGCGGCTACCTGGCCTAATACTGACAC  
TGAGGCACGAAAGCGTGGGGAGCAAACAGGATTAGAGACCCTAGTAGTCC  
>Otu19150  
CCAGCCTATGGGAGGCTGCAGTCGAGAATTTTTCTCAATGGGCGAAAGCCTGAAGGAGCG  
ACGCCGCGTGGAGGATGAAGGTTTTTCGGATTGTAAACTCCTGTCACTGCAGAACAAGGAT  
ATGCTCGTTAACAGCGAATGTATTTGATGGTATGCGGAGAGGAAGGGACGGCTAACTCTG  
TGCCAGCAGCCGCGGTAGTACAGAGGTCCCAAGCGTTGTTTCGGATTCACTGGGCGTAAAG  
GGTGCCTAGGCGGCTTGACAAGTCTGATGTGAAATCCCGCAGCTTAACCTGCGGAAGTGC  
TTGGAACTGTCTGACTAGAGGAATGGAGGGGAGACTGGAATGCTTGGTGTAGCAGTGAA  
ATGCGTAGATATCAAGCGGAACACCAGTGGCGAAGGCGAGTCTCTGGACATTTCTCTGACG  
CTGAGGCACGAAAGCCAGGGGAGCAAACGGGATTAGATAACCCCTGTAGTCC  
>Otu19151  
CCTATGGGGGGCAGCAGTGAGGAATTTTCGTCAATGGGGGCAACCCTGAACGAGCAACGC  
CGCGTGCAGGATGACACTTTTCGGAGCGTAAACTGCTTTTCTCGGGGACGAGTAAGGACG  
GTACCCGAGGAATCAGCCCCGGCTAACTACGTGCCAGCAGCCGCGGTAATACGTAGGGGG  
CGAGCGTTGTCCGAGTTACTGGGCGTAAAGCGCACGCAGGCGGTTCGTGTAAGTTTGGAG  
TGACAATTCTCGGCTTAACCTGAGAAGGGCCTTTGAAGACTGCACGACTTGAGGGCTCACG  
AGGGACACGGAATTCGGGTGGAGTGGTGAATGCGTAGAGATCCGGAGGAACACCAAAG  
GCGAAGGCAGTGTCTGGGGAGTACCTGACGCTCAGGTGCGAAAGCTAGGGGAGCGAACG  
GGATTAGAAACCCCTAGTCC  
>Otu19158  
CCGCCTATGGGGTGCAGCAGTAAGGAATATTGGTCAATGGACGCAAGTCTGAACCAGCCA  
TGCCGCGTGGAGGATGAAGGCCCTCTGGGTGTAAACTTCTTTTATTGGGGAAGAAACCT  
GTTTTTCTAAAGCAGTTGACGGTACCGGAAGAAGAAGCACCGGCTAACTACGTGCCAGC  
AGCCGCGGTAATACGTAGGGTGCAGAGCGTTAATCGGAATTACTGGGCGTAAAGGGTGC  
AGGCGGTTCCGCAAGTCAGGCGTGAATCCCCGGGCTTAACCTGGGAATGGCGCTTGAAA  
CTACGGGACTCGAGTATGGCAGAGGGAGGTGGAATTCACGTGTAGCGGTGAAATGCGTA  
GAGATGTGGAGGAACACCGATGGCGAAGGCAGCCTCCTGGGCCAATACTGACGCTCATGC  
ACGAAAGCGTGGGGAGCAAACAGGATTAGAAAACCCGCGTAGTCC  
>Otu19168  
CCAGCCTATGGGTGGCTGCAGTGGGGAATATTGGACAATGGGCGCAAGCCTGATCCAGCA

ATGCCGCGTGAGTGAAGAAGGTCTTCGGATTGTAAAGCTCTTTTCGACGGGGACGATGATG  
ACGGTACCCGTAGAAGAAGCCCCGGCTAACTTCGTGCCAGCAGCCGCGGTAATACGAGGG  
GGGCAAGCGTTGTTTCGGAATTATTGGACGTAAAGGGAGCGTAGGCCGTTTTGTAAAGTCGT  
GTGTGAAATCTTCGGGCTCAACCCGAAGTCTGCACACGAACTGCAGGGCTTGAGTATGG  
GAGAGGTGAGTGGAATTCCTGGTGTAGCGGTGAAATGCGTAGATATCAGGAGGAACACCT  
GTGGCGAAAGCGGCTCACTGGACCATCACTGACGCTGAGGCTCGAAAGCTAGGGGAGCAA  
ACAGGATTAGAAACCCAGTAGTCC

>Otu19172

CCAGCCTATGGGAGGCTGCAGTGGGGAATCTTGCGCAATGGGCGAAAGCCTGACGCAGCA  
ACGCCGCGTGAGTGATGAAGGCCCTTCGGGTCGTAAAGCTCTTTTCGGAAGGGACGAAACCG  
GCCGGGATAACAAACCGGGCCGCTGACTGTACCTTAAGAAGAAGCACCGGCTAACTCTG  
TGCCAGCAGCCGCGGTAATACAGAGGGTGAAGCGTTGTTTCGGAATTATTGGGCGTAAAG  
CGCGTGTAGGCGGCCAAGCATGTCGGGTGTGAAAGCCCTGGGCTTAACCCAGGAAGTGCG  
CCCGAAACTACTTGGCTTGAGTGTGCGAGAGGATGGCGGAACTCCCGGTGTAGAGGTGAA  
ATTTCGTAGATATCGAGAAGAACACCGGTGGCGAAGGCGGCCCGCTGGACGAAGACTGACG  
CTGAGACGCGAAAGCGTGCGGAGCAAACAGGATTAGATACCCGAGTAGTCC

>Otu19181

CCAGCCTATGGGTTGCTGCAGTCGAGGATCTTCGTCAATGGGCGAAAGCCTGAACCGACC  
ATGCCGCGTGAGGGAAGACGGCCCTACGGGTGTAAACCGCTTTTGCAGGGGAATAAACCC  
TCCCGACGAGTCGGGAGCTGAATGTACCCTGAGAATAAGGATCGGCTAACTCCGTGCCAG  
CAGCCGCGGTAATACGGAGGATCCAAGCGTTATCCGGATTTATTGGGTTTAAAGGGTGCG  
TAGGTGGCTTGTTAAGTCAGGGGTGAAAGACGGTAGCTTAACCTATCGCAGTGCCTTTGAT  
ACTGACGAGCTTGAATGAACTAGAGGTAGGCGGAATGTGACAAGTAGCGGTGAGATGCAT  
AGATATGTCACAGAACACCAATTGCGAGGGCAGCTTACTATGGTTTTTATTGACACTGAGG  
CACGAAAGCGTGGGGATCAAACAGGATTAGAAACCCGGGTAGTCC

>Otu19191

CCAGCCTATGGGGGGCTGCAGTGGGGAATATTGGACAATGAGCGCAAGCCTGATCCAGCC  
ATGCCGCGTGAGTGAAGGCCCTAGGGTTGTAAAGCTCTTTTGTCCGGGAAGAAACGG  
TGTTCTCTAATATAGAGCACTAATGACGGTACCGGAAGAATAAGCACCGGCTAACTACGT  
GCCAGCAGCCGCGGTAATACGTAGGGTGCAAGCGTTAATCGGAATTACTGGGCGTAAAGC  
GTGCGCAGGCGGTTATGTAAGTCAGCTGTGAAATCCCCGGGCTTAACCTGGGAATGGCAG  
TTGAGACTGCATGGCTAGAGTGTGTCAGAGGGGGGTAGAATTCACGTGTAGCAGTGAAA  
TGCGTAGAGATGTGGAGGAATACCGATGGCGAAGGCAGCCCCCTGGGATAACACTGACGC  
TCATGCACGAAAGCGTGGGGAGCAAACAGGATTAGAAACCCCTTGTAGTCC

>Otu19192

CCAGCCTACGGGTTGCAGCAGTCGAGAATATTTGACAATGGAGGGAACTCTGATCAAGCG  
ACGCCGCGTGAGGATGAAGTCCTTCGGGATGTAAACTGCTTTTGTAGACCACTAAGTTT  
TGAAGGGTCTAAGAATAAGAGGTTGCTAAACTCGTGCCAGCAGCAGCGGTAATACGAGTG  
CCTCAAGCGTTATCCGGAATTATTGGGCGTAAAGGGTATGTAGGTGGTTTTGTAGTCTT  
CTGTTAAAACTCTGGGCTTAACCCAGAATATGCAGGAGAAACGGCAAGACTTTAGAGTGC  
GCGAGGGGCTGTGGAACCTCTAGGTGTAGCAGTGAAATGCGTTGATATCTAGGGGAACAC  
CAAAAGCGAAGGCAGCAGACTGGAGCATTACTGACACTGAAATACGAAAGCGTGGGTAGC  
GAATGGGATTAGATACCCGAGTAGTCC

>Otu19196

CCAGCCTATGGGGTGCTCCAGTCGAGAATTTTTCTCAATGGGGGAAACCCTGAAGGAGCG  
ACGCCGCGTGAGGATGAAGTCCTTCGGATTGTAAACTCCTGTCATTAGGGAACAATTGT  
CCGCGATTAACTGTCGCGGGCTTGATAGTACCTGAAGAGGAAGAGACGGCTAACTCTGTG  
CCAGCAGCCGCGGTGATACAGAGGTCTCAAGCGTTGTTTCGGATTTCATTGGGCGTAAAGGG  
TGCGTAGGCGGCGGGGCAAGTCAGGTGTGAAATCTCGGGGCTCAACCCGAAACTGCACT  
TGATACTGCCTTGCTAGAGTGCTGGAGAGGAGATTGGAATTTACGGTGTAGCAGTGAAAT  
GCGTAGATATCGTAAGGAAGACCAGTGGCGAAGGCGAATCTCTGGACAGCAACTGACGCT  
GAGGCACGAAGGCCAGGGGAGCAAACGGGATTAGATACCCAGTAGTCC

>Otu19198

CCAGCCTACGGGAGGCTGCAGCATTAGCACCGGAAATTAACGGAGACACATCAACTACTT  
TCCTTAATATTGTTCTAAATTGTTGCGATGTAGATGAATTAGATCCAGACATTGAAAGCG  
TAGGTATAAATTGCTTGCCACTCAATAATTCTTCGTCTAAAAACCAACCGATTTCCCTAA  
TATTAACAGCGTTTGAAATCTTCTTTAACTGCTCTATGAGGAATTGACGAGCATCTTCCC  
ATGATTCAGGTACAGTATCGTAAACAGGTATATAGCTTTCAAAGTTTTGGTTATTCATTT



AAGTGCCTATTGCCACCCAATAGAAAAAATTGTAGGAAATTGTTCCAGTATAAGCCCAAT  
TAAATGAAGTACTTCCAGGGGTTCTATTGTGTATATCGTATTAGATACCCTCTAGTCC  
>Otu19206  
GGACTACTAGGGTTTCTAATCCCGTTTGCTCCCCTAGCTTTCGTGTCTCAGTGTCTCAGCAA  
ACTCCCAGCGAGCTGTTTTTACCATTGGCGTTCCAAATGATATCTACGCATTTTACCAGCT  
CCACCATTTGTTCCGCTCGCCCCCTAAGTTGCTCAAGACCAGCAGTATAACCGAGCAGTTCC  
ACGGTTGAGCCGTGGGATTTTACAAGGTACTTACCAGTCCACCTACACACGCTTTAAGCC  
CAGTGATTCCGCCTAACGCTTGGCACCTCTGTCTTACCGCGGCTGCTGGCACAGAGTTAG  
CCGTGCCTTCTCTGGGGTTGATCAGAACTTTCTAACCCCTGACAGTGGTTTACATCCCG  
AAGGACTTCGTCCACACGCGGCTCGCTCCGTACACTTTCGTGCATTGCGGAAGATTC  
GTTACTGGTGCCCCCATAGGCTGG  
>Otu19216  
CCAGCCTATGGGGGGCTGCAGTGGGGAATATTGGACAATGGGCGAAAGCCTGATCCAGCA  
ATGCCGCGTGTGTGAAGAAGGTCTTCGGATTGTAAAGCACTTTCGACGGGGACGATGATG  
ACGGTACCCGTAGAAGAAGCCCCGGCTAACTTCGTGCCAGCAGCCGCGGTAATACAGAGG  
TCCCAAGCGTTGTTTCGGATTCAGTGGGCGTAAAGGGTGCGTAGGTGGCAGGGTAAGTTTG  
ATGTGAAATCTCCGGGCTTAACCCGGAAGTGCATTGAATACTATCCTGCTCGAGGGTTG  
GAGGGGGGACTGGAATACTTGGTGTAGCAGTGAAACGCGTAGATATCAAGTGGAACACCA  
GTGGCGAAGGCGAGTCCCTGGACAACCTCCTGACACTGAGGCACGAAAGCTAGGGGAGCAA  
ACAGGATTAGATACCCTAGTAGTCC  
>Otu19230  
CCAGCCTATGGGGGGCACCAGTAGGGAATATTGGACAATGGACGAAAGTCTGATCCAGCC  
ATCCCGCGTGAAGGATTAAGGCCCTATGGGTTGTAAACTCTTTTCTTTGGGAATAAAAA  
GCGGTATTCATATCGCCTTGAAGGTACCAGAGGAATAAGCACCGGCTAACTCCGTGCCAG  
CAGCCGCGGTAATACGGAGGGTGCAAGCGTTATCCGGATTTACTGGGTTTAAAGGGTGCG  
TAGGTGGGTCTGTAAGTCAGTGGTGAAATCTTCGAGCTTAACTCGGAACTGCCATTGAT  
ACTATAGATCTTGAATTATCTGGAGGTAAAGCGGAATATGTCATGTAGCGGTGAAATGCTT  
AGATATGACATAGAACACCAATTGCGAAGGCAGCTTACTACGGATCGATTGACACTGAGG  
CACGAAAGCGTGGGGAGCAAACAGGATTAGAAACCCCCGTAGTCC  
>Otu19233  
CCAGCCTATGGGACGCTGCAGTTAGGAATCTTGCGCAATGGGAGAAATCCTGACGCAGCG  
ATGCCGCGTGAGGGACGAAGGCCTTCGGGTGTAAACCTCTTTTAGTTGGGAAGATACAA  
GACGGTACCAACAGAAAAAGCACCGGCTAACTCTGTGCCAGCAGCCGCGGTGATACAGAG  
GGTGCAAGCGTTATTCGGATTTACTGGGCGTAAAGCGCGCGGGGCTGTTTAGCAAGTCT  
GATGTGAAAGCCCCTGATTAAAGCAGGGAAGTGCACCAGATACTACTAGACTAGAGTGCA  
GGAGAGAGAAGCGGAATTCCAGGTGTAGAGGTGAAATTCGTAGATATCTGGAGGAACAAC  
GGCGGCGAAGGCGGCTTCTTGGACTGTTACTGACGCTGAGGCGCGAAAGCGTGGGGAGCA  
AACAGGATTAGATACCCCGTAGTCC  
>Otu19270  
CCAGCCTATGGGGCGCACCAGGGAAATCTTTGGCGAAAGCAGTCTTTCAAAAAGCAGGG  
AAGGCACTTGGTCAAGCGCTTGGCTCTCTGGTCAACACGCTCGACCCCCGCCTTTATGTA  
ATTGGTGATGGGCTATCCGGTGATGGGACCTCTTCGCACCTTCGATGTTCAACGAATTA  
GAGCGGCGCAGCTATGTTTACCGCATCGCTGCAAGCTGTGCCAATACCGCGCAGGATTCA  
AGACCGATAGCAGTTGAACCAGCGCATCTTGGCTCTGCGGCTGGCCTAGTGGGTGCTGCT  
GCACTTCCAACGTAAGTGAATAATGGTTCGTGCTGCCAGTCTAGATCGAACCCGTCTCTGT  
CCGAATTCCCGTTAATAGGGTATTTAACAGGGAATTCCGATGGTTTTTGGTCCGTCAAATT  
AGAGACCCGCGTAGTCC  
>Otu19275  
CCAGCCTATGGGTTGCTGCAGCTAAGAATATTCCGCAATGGACGAAAGCCTGATCCAGCC  
ATGCCGCGTGAGTGATGAAGGCCTTAGGGTTGTAAAGCTCTTTTGTGAGGGAAGATAATG  
ACGGTACCTGAAGAATAAGCACCGGCTAACTTCGTGCCAGCAGCCGCGGTAATACGAAGG  
GTGCTAGCGTTGTTCCGAATTACTGGGCGTAAAGCGCGCATAGGCGGTAATACAAGTCAG  
AGGTGAAATCCCAGGGCTCAACCCTGGAAGTGCCTTTGAACTGTATTGCTGGAGTGTGT  
GAGGGGATAGCGGAATTGCTAATGTAGAGGTGAAATTCGTAGATATTAGCAGGAACACCG  
GTGGCGAAGGCGGCTATCTGGCACACAACCTGACGCTGAGGCGCGAAAGCGTGGGGATCAA  
ACAGGATTAGAAACCCCTTGTAGTCC  
>Otu19290  
CCAGCCTACGGGGCGCACCAGTCGAGAATCTTCGCAATGGGCGAAAGCCTGACGGAGCG

ACGCCGCGTGGTTGATGAAGTCCTTCGGGACGTAAAAACCTTTTATGAGTCACTAAGTTA  
TTGAAGAGCTCATGAATAAGGGGTTGCTAAACTCGTGCCAGCAGCAGCGGTAATACAAGT  
GCCCCAAGCGTTATCCGGAATCATTGGGCATAAAGGGTGTGTAGGTGGTCGTGTTAGTCT  
TGTGTTAAATTCTTTGGCTCAACCAAAGATCTGCATAGGAAACGGCACGACTTGAAGATG  
CGAGGGGTGAATGGAACATAGTGGAGGGGTGAAATCCGTTGATATTATGGGGAACACC  
AAAAGCGAAGGCAATTCCTGCGCATTCCTTGACACTGAAACACGAAAGCGTGGGTGCG  
AATGGGATTAGAAACCCCGTAGTCC

>Otu19294

GGACTACGCGGGTATCTAATCCTGTTTGATCCCCACGCTTTCGTGCCTCAGCGTCAATCA  
TCGTGTAGCAAGCTGCCTTCGCAATTGGTGTTCTATGTCATATCTAAGCATTTTACCCT  
ACATGACATATTCGCGCTGCCTCCACGACATTCAGACAGATAGTATCAACGGCAGTTTC  
CGAGTTAAGCTCGGAGATTTTACCCTGACTTACCTGCCACCTACGCACCCTTTAAACC  
CAGTGAATCCGGATAACGCTTGCACCCTCCGTATTACCGCGGCTGCTGGCACGGAGTTAG  
CCGGTGCTTATTCAACTGGTACCGTCAACCGCAATAGAAATCGCGGGTTTCTTCCAGAT  
AAAGGAAGTTTACAACCCAGAGGGCCTTCATCCTCCACGCGGCATGGCTGGTTCAGGCTT  
GCGCCCATTGACCAATATTCTTACTGCTGCAACCCATAGGCTGG

>Otu19304

CCAGCCTATGGGACGCTGCAGTCGAGAATCTTCCGCAATGGACGAAAGTCTGACGGAGCG  
ATGCCGCGTGATCGATGAAGCTCTTCGGAGTGTAAGGTCTTTTATGAGGGAAGAAATTT  
TTGACGGTACCTCAGGAATAAGGGGCTCCTAATCTCGTGCCAGCAGGTGCGGTAATACGA  
GAGCCCCAAGCGTTATCCGGAATTATTGGGCGTAAAGGGTGCCTAGGTGTTTTGTTAGT  
CTTTTGTTAAATCTCCGGGCTTAACCTGGAAATCGCAAAAGAAACGGCAAGACTCGAGAA  
TGTGAGGGGTGAATGGAACCATGGTGTAGGGGTGAAATCCGTTGATATCATGGGGAACA  
CCAAAAGCGAAGGCAATTCCTGCGACATATCTGACACTCAAGCACGAAAGCGTGGGTAG  
CGAATGGGATTAGAAACCCGAGTAGTCC

>Otu19317

CCAGCCTACGGGGGGCTGCAGTCGAGAATCTTTCGCAATGGGCGCAAGCCTGACGAAGCG  
ACGCCGTGTGAGCGAAGAAGGCCTTCGGGTGTAAAGCTCTTTCGCTTGGAACAAGAAA  
GGAGTACGAATAATACTCCGATTTGAGGGTACTAGGTAAAGAAGCACTGGCTAACTCCGT  
GCCAGCAGCTGCGGTAATACGGAGGGTGCAAGCATTGATCGGAATTACTGGGCGTAAAGG  
GCGCGTAGGCGGCCGGGCAAGTCAGATGTGAAATCCCGCGACTCAATCGCGGAGCTGCAT  
TTGAAACTACTTGGCTTGAGCGTAGTTAGGGAAAACGGAATTCACGTGTAGCGGTGAAA  
TGCGTAGATATGTGGAAGAACACCGGTGGTGAAGACGGTTTTCTGGGCTAATGCTGACGC  
TGAGGCGCGAAAGCTAGGGGAGCAAACAGGATTAGAAACCCAGTAGTCC

>Otu19318

CCAGCCTACGGGTTGCAGCAGTGGGGAATTTTTCGCAATGGGGGAAACCTGACGCAGCA  
ACGCCGCGTGAGGATGAAGTACTTCGGTACGTAAACTCCTTTTCGATCGGGACGATAATG  
ACGGTACCGGAAGAAGAAGCCCCGGCTAACTTCGTGCCAGCAGCCGCGGTAATACGAGGG  
GGGCGAGCGTTGTTTCGAATTATTGGGCGTAAAGGGTGCCTAGGCGGTTTGGTAAGTCTT  
ATGTGAAATCTATGGGCTCAACTCATAGACTGCATGAGAACTGCCGGGCTTGAGCGTGG  
GAGAGGAAAGTGGAATTCCTGGTGTAGCGGTGAAATGCGTAGATATCAGGAGGAACACCG  
GTGGTGTAAACGGCTTTCTGGACCATAACTGACGCTGAGGCACGAAAGCGTGGGTAGCAA  
ACAGGATTAGAAACCCGTGTAGTCC

>Otu19319

CCAGCCTACGGGGTGCACCAGTCGAGAATCTTCCGCAATGGACGAAAGTCTGACGGAGCG  
ACGCCGCGTGAGGATGAAGTTCTTCGGAATGTAAACTCCTTTTTCGAGGGAAGAAAGTTA  
TTGATTGTACCTGGAGAATAAGAGGTTGCTAAACTCGTGCCAGCAGCAGCGGTAATACGA  
GTGCCTCAAGCGTTATCCGAAATCATTGGGCGTAAAGGGTGTGTAGGTGGCATTGTTAGT  
CTCGCGTTAAATTCCTCCGGCTCAACCGGAGAGCTGCGTGGGAAACGGCAAAGCTTCGAGG  
ACGGAAGAGGTCTCTGGAACCATGGTGTAGCGGTGAAATGCGTTGATATCATGGGGAAC  
ACCAAAGCGAAGGCAAGAGACTGGTCCGCTCCTGACACTGAGACACGAAAGCCAGGGGA  
GCAAACGGGATTAGAAACCCCTGTAGTCC

>Otu19321

CCAGCCTATGGGGGGCTCCAGTAGGGAATATTTCGCAATGGAGGAAACTCTGACGCAGCG  
ACGCCGCGTGGGTGACGAAGGCCTTCGGGTGCTAAAGCCCTGTGCGAAGGGAAGAAAAAC  
GATGTTGCTAATATCAACGTCGATTGACGGTACCTTTAAAGGAAGCACCGGCTAACTACG  
TGCCAGCAGCCGCGGTAATACGTAGGGTGCAAGCGTTGTTTCGGAATCATTGGGCGTAAAG  
CGCGTGTAGGCTGTTAGTTAAGTCGGATGTGAAATCCCTGGGCTCAACCGAGGAAGTGCA

TTCGAAACTAACTGGCTAGAGAATGGTAGAGGAAGGTGGAATTCGAAGTGTAGAGGTGAA  
ATTCGTAGATATTTGGAGGAATACCGGTGGCGAAGGCGGCCTTCTGGGCCATTTCTGACG  
CTGAGACGCGAAAGCGTGGGGAGCAAACAGGATTAGATACCCTCGTAGTCC

>Otu19326

CCAGCCTATGGGTTGCACCAGTCGAGAATTTTTTCACACTGAGCGAAAGCTTGATGGAGCG  
ACGCCGCGTGGGGGATGAATGGCTTCGGCCCGTAAACCCCTGTCATTCGCGAACAAACGT  
TGTCCGATAATACCGGGCAACCTGATAGTAGCGGAAGAGGAAGGGACGGCTAACTCTGTG  
CCAGCAGCCGCGGTAATACAGAGGTCCCAAGCGTTGTTTCGGATTCACTGGGCGTAAAGGG  
TGCGTAGGTGGTCGGGTAAGTCTGATGTGAAATCTCGGAGCTCAACTCCGAAACTGCATT  
GGATACTATCTGGCTAGAGGATCGGAGGGGGGACTGGAATTCTCGGTGTAGCAGTGAAAT  
GCGTAGATATCGAGAGGAACACCAGTGGCGAAGGCGAGTCCCTGGACGACTCCTGACACT  
GAGGCACGAAGGCTAGGGGAGCAAACAGGATTAGAGACCCCGGTAGTCC

>Otu19331

CCAGCCTATGGGACGCGACCAGCGGGGAATATTGGACAATGGGCGCAAGCCTGATCCAGCC  
ATGCCGCGTGAGTGATGACGGCCCTAGGGTTGTAAAGCTCTTTCACCCACGACGATAATG  
ACGGTAGTGGGAGAAGAAGCCCCGGCTAACTTCGTGCCAGCAGCCGCGGTAATACGAAGG  
GGGCTAGCGTTGCTCGGAATCACTGGGCGTAAAGCGCACGTAGGCGGCTTTTTAAGTCAG  
GGGTGAAGTCCTGGAGCTCAACTCCAGAAGTGGCCCTTGATACTGAGAAGCTCGAGTTCGG  
GAGAGGTGAGTGGAAGTGCAGTGTAGAGGTGAAATTCGTAGATATTCGCAAGAACACCA  
GTGGCGAAGGCGGCTCACTGGCCCGATACTGACGCTGAGGTGCGAAAGCGTGGGGAGCAA  
ACAGGATTAGATACCCTCGTAGTCC

>Otu19335

CCAGCCTACGGGGGGCTCCAGTGGGGAATATTCGCAATGAGCGAAAGCTTGACGGAGCG  
ACGCCGCGTGAGGATTGAAGGCCTTCGGGTGTAAACTCCTATCGGTGCATAAGAATGG  
TTGCGCTGAAGGGCGCAACTTGACCAAGCACAAATGAAGCCATGGCTAATTCGCTGCCAG  
CAGCCGCGGTAACACGGGGGTGGCTAACGTTGCTCGGTGTCAGTGGGCGTAAAGCGCGCG  
TAGGCGGTCCAATAAGTTGGTCGTGAAATACTCCGGATCATCCGGGGTGCGGCGACCAAA  
ACTGCTGGACTGGAGTGCCGGCGGGGAGAGTGGAAGTCTTGGTGGAGCGGTGAAATGCGT  
AGATATCAGGAGGAACGCCGGTGGCGAAGGCGACTCTCTAGACGGTGACTGACGCTGAGT  
GTGCGAAAGCTAGGGGAGCAAACGGGATTAGAAACCCTAGTAGTCC

>Otu19340

CCAGCCTACGGGGGGCACCAGTTGGGAATCGTACGCAATGGGCGACAGCCTGACGTCGCG  
ACGCCGCGTGGTCAAGAAGCTCTTCGGGTGTAAAGACCTTTTGTAAGAGAAGATTGTG  
ACAGTACCTTACGAATAAGGACCTGCTAACTACGTGCCAGCAGCAGCGGTAATACGTAGG  
GTCCAAGCGTTGTCCGGAATTATTGGGCGTAAAGAGCATGTAGGTGGAACCTCCAGTCGA  
ATTTTAAAGGTCAAGGCTCAACTTTGATTTTGGATTTGATACTAAGGTTCTAGGAGTTTA  
GTAGGGGTAAGCGGAAGTCCCGGTGTAGCAGTGAAATGCGTTGATATCGGGAAGAACACC  
AATGGCGAAGGCAGCTTGCTAGGCTAAACTGACACTGAGATGCGAAAGCGTGGGGAGCGA  
ACGGGATTAGAGACCCCTGTAGTCC

>Otu19343

CCAGCCTATGGGTTGCAGCAGTGGGGAATTTTGCACAATGGGGGAAACCCTGATGCAGCA  
ACGCCGCGTGAGGATTGAAGTCCCTTGGGATGTAAACTCCTTTTCGACCGGGACGATAATG  
ACGGTACCGGTGGAAGAAGCCCCGGCTAACTTCGTGCCAGCAGCCGCGGTAATACGAAGG  
GGGCTAGCGTTGTTTCGGAATTACTGGGCGTAAAGCGCACGCAGGCGGCTCGATAAATTAG  
AAGTGAAAGCCCCGGGCTTAACCTGGGAATTGCTTTTAAGACTGTGAGCTAGAATCCAG  
AAGAGGGTAGTGGAATTCCGAGTGTAGAGGTGAAATTCGTAGATATTGGGAAGAACACCA  
GTGGCGAAGGCGACTACCTGGTCCGGCATTGACGCTCATGTGCGAAAGCGTGGGGAGCAA  
ACAGGATTAGAAACCCTTGTAGTCC

>Otu19358

CCAGCCTACGGGGGGCAGCAGTCTAGAGGCTTCGGCAATGGGGGCAACCCTGACCGAGCG  
ACGCCGCGTGTGGGATTGAAGGCCTTCGGGTTCGTAAACCACTGTGAGGAGGGACGAATGC  
CCTGGTGGTAAACCAGGGAGTGACGGTACCTCCAGAGGAAGCCCCGGCTAACTCCGTGCC  
AGCAGCCGCGGTAATACGGAGGGGGCAAGCGTTGTTTCGGATTTACTGGGCGTAAAGAGTT  
CGTAGGCGGTGCGGTAAGTCTGACGTGAAATCTCCGACGCTTAACGTGGAGAGGTGCTTG  
GATACTGCGTGACTTGAGTATGGAAGAGGCTAGCGGAATTCCTGGTGTAGCGGTGGAATG  
TGTAAGATATCAGGAAGAACATCAGTGGCGAAGGCGGCTAGCTGGGCCATTACTGACGCTG  
AGGAACGAAAGCGTGGGGAGCAAACGGGATTAGAAACCCCGGTAGTCC

>Otu19361

CCTATGGGTGGCAGCAGTAAGGAATATTGGTCAATGGGCGAAAGCCTGACGCAGCGACGC  
CGCGTGAGTGATGAAGGCCCTTCGGGTTGTAAAGCCCTGTGGGGAGGGACGAATTAGCGCC  
GGTCAATACCCGGCGTGATGACGGTACCTCCTTAGCAAGCACCGGCTAACTCTGTGCCAG  
CAGCCGCGGTAAGACAGAGGGTGCAAACGTTGTTTCGGAATTACTGGGCGTAAAGCGCGTG  
TAGGCGGCCGCGTAAGTCGGATGTGAAATCCCTCGGCTCAACTGGGGAAGTGCACCCGAA  
ACTGCATGGCTCGAGTCTCGGAGAGGATCGTGGAATTCTCGGTGTAGAGGTGAAATTCGT  
AGATATCGAGAGGAACACCGGTGGCGAAGGCGGCGATCTGGACGATGACTGACGCTGAGA  
CGCGAAAGCGTGGGGAGCAAACAGGATTAGAAACCCCTGTAGTCC

>Otu19367

CCAGCCTACGGGAGGCACCACTCTAGAGGCTTCGGCAATGGACGAAAGTCTGACCGAGCG  
ACGCCGCGTGAGGACGAAGGCTTCGGATTGTAAAGCTCCTTTTCGGGTGGAAGGAAAGGT  
GGGATGGTGAATCCCGCTGTGACCGACCGCCGGAAGAAGCCCCGGCTAACTTCGTGCCAG  
CAGCCGCGGTAATACGAAGGGGGCAAGCGTTATTTCGGATTTATTGGGCGTAAAGGGCGTG  
TAGGCGGCTTGTTAAGTCCGGTGTGAAAACGCTACCGCTCAACGAGCGAATGCGCTGGA  
TACTATCAAACCTTGAGTGCGAGAGAGGTGAGGAGAATACCTGGTGTAGCGGTGGAATGCT  
TAGAGATCAGGTAGAATACCCGAGGCGAAGGCGCCTCACTGGCTCGTTACTGACGCTAAG  
GCGCGAAAGCGTGGGGATCAAACGGGATTAGATAACCCCGTAGTCC

>Otu19368

CCAGCCTACGGGTGGCTGCAGTAAGGAATATTGGTCAATGGGCGCAAGCCTGAACCAGCC  
ATGCCGCGTGACAGGATGACGGCCCTATGGGTTGTAAACTGCTTTTGTACGGGAAAAAACC  
CCTTTACGTATAAAGGGTTGATGGTACCGTAAGAATAAGGATCGGCTAACTCCGTGCCAG  
CAGCCGCGGTAATACGGAGGATCCGAGCGTTATCCGGATTTATTGGGTTTAAAGGGTGCG  
CAGGCGGAATAATAAGTCAGTGGTGAATCCTACAGCTTAACTGTAGAACTGCCATTGAT  
ACTGTTATTCTTGAGTATAGTTGAAGTGGGCGGAATGTGTCATGTAGCGGTGAAATGCTT  
AGATATGACACAGAACACCAATTGCGAAGGCAGCTCGCTAAGCTATAACTGACGCTCATG  
CACGAAAGCGTGGGGATCAAACAGGATTAGAAACCCCGCTAGTCC

>Otu19379

CCAGCCTACGGGTGGCAGCAGTGGGGAATCTTGCGCAATGGAGGAAACTCTGACGCAGCG  
ACGCCGCGTGTCGATGAAGGTCTTCGGATCGTAAAGCACTCTCGCGAGGGACAAATAAA  
TTGATGGTACCTCGAGAGGAAGCACCGGCTAACCCTGTGCCAGCAGCCGCGGTAATACAG  
AGGGTGCAGCGCTTGTTTCGGAATTATTGGGCGTAAAGCGCTGGTAGGCGGTCTGAAAAGT  
CGCTTGTAAGGCTCCCGGCTCAACCGGGAAAGTGCGGGCGAAACTGGCGGACTTGAGTG  
TCGGAGAGGGTCGCGGAATTCCCGGTGTAGAGGTGAAATTCGTAGATATCGGGAGGAACA  
CCAGAGGCGAAGGCGGCGACCTGGAAGATGACTGACGCTGAGCAGCGAAAGCGTGGGGAG  
CAAACGGGATTAGATAACCCGTGTAGTCC

>Otu19393

CCAGCCTACGGGTTCGCACCACTCGAGAATTTTTCACAAATGGACGAAAGTCTGATGGAGCG  
ACGCCGCGTGAGGATGAAGGTTTTTCGGATTGTAAACTCCTGTCACTGCAGAACAAGGGT  
GCGCATGTTAATAGCAAGCGCATTTGATGGTATGCGGAGAGGAAGGGACGGCTAACTCTG  
TGCCAGCAGCCGCGGTAAGACAGAGGTCCCGAGCGTTGTTTCGGATTCAATGGGCGTAAAG  
GGTGTGTAGGAGGTGGGGTAAGTCAGGTGTGAAATCTCAGAGCTTAACTCTGAAACTGCG  
CTTGGTACTGCTCTGCTAGAGGATCGAAGGGGGTATCGGAATTTATGGTGTAGCAGTGAA  
ATGCGTAGATATCATAAGGAACACCGGTGGCGAAGGCGGATACCTGGACAGTTCCTGACG  
CTGAGGCACGAAGGCCAGGGGAGCAAACGGGATTAGAGACCCGCGTAGTCC

>Otu19396

CCAGCCTATGGGTGGCTGCAGTGGGGAATCTTGCAATGGAGGAAACTCTGATGCAGCG  
ACGCCGCGTGAGCGATGAAGCCCTTCGGGGTGTAAGCACTTTTGGCAGGGACGATGATG  
ACGGTACCTGCAGAATAAGCCCCGGCTAACTTCGTGCCAGCAGCCGCGGTAATACGAAGG  
GGGCTAGCGTTGCTCGGAATGACTGGGCGTAAAGGGCGTGTAGGCGGTTTATACAGTCAG  
ATGTGAAATTCCTGGGCTCAACCTGGGGACTGCATTTGAGACGTGTAGACTAGAGTGAGG  
AAGAGGGTTGTGGAATTTCCAGTGTAGAGGTGAAATTCGTAGATATTGGAAAGAACACCG  
GTGGCGAAGGCGGCGACCTGGTCCTTGACTGACGCTGAGGCGCGAAAGCGTGGGGAGCAA  
ACAGGATTAGAAACCCCTTGTAAGTCC

>Otu19399

CCAGCCTATGGGTGGCAGCAGTGGGGAATATTGGACAATGGGCGAAAGCCTGATCCAGCA  
ATGCCGCGTGTTGAAGAAGGCCTGCGGGTTGTAAAGCACTTTTCAGTTGGGAGGAAAAAG  
TGAAGGATAATATCCTTCAAAATTGACATTACTAACAGAAGAAGCACCGGCTAACTCTGT  
GCCAGCAGCCGCGGTAATACAGAGGGTGCAAGCGTTAATCGGAATTACTGGGCGTAAAGA

GCACGTAGGTGGTTTGACAAGTTGGGTGTGAAATCCCCGGGCTTAACCTGGGAACTGCAT  
TCAAACTATCAAAGTAGAGTAGAGTAGAGGGAAGTGGAATTTCCGGTGTAGCGGTGAAA  
TGCGTAGATATCGGAAGGAACACCAAGTGGCGAAGGCGGCTTCCTGGACTCATACTGACAC  
TGAGGTGCGAAAGCGTGGGGAGCAAACAGGATTAGATAACCCGTGTAGTCC

>Otu19404

CCAGCCTACGGGGCGCACCAAGTCGAGAATTTTTCTCAATGGGGGAAACCTGAGGGAGCG  
ACGCCGCGTGGAGGATGAAGGTCTTCGGATTGTAACTCCTGTCATTTGAGAACAAGTGG  
TTCGCGTTAACTGCGCGGGCTTTGATAGTATCAGAAGAGGAAGAGGCGGCTAACTCTGTG  
CCAGCAGCCGCGGTAATACAGAGGCCTCAAGCGTTGTTTCGGATTTCATTGGGCGTAAAGGG  
TGCGTAGGCGGTTCCGTAAGTCGGGTGTGAAATCTTGGGGCTCAACCTCAAACTGCACT  
CGATACTGCGGGGCTGGAGGACTGGAGAGGAGAGTGGAATTCACGGTGTAGCAGTGAAAT  
GCGTAGATATCGTGAGGAAGACCAGCGGCGAAGGCGGCTCTCTGGACAGTTCCTGACGCT  
GATGCACGAAGTCCAGGGGAGCAAACAGGATTAGAAACCCGCGTAGTCC

>Otu19405

CCAGCCTACGGGGCGCTGCAGTGGGGAATATTGGACAATGAGCGACAGCTCGATCCGGCG  
ATGTTATATGAGTGATGAAGGATATTTTGTAAAGCTTATAGCTAATTGAGAATTCATGAT  
CAAATTAGTAAATAGCCCCGACTAACTTCGTGCCAGCAGTCGCGGTAATACGGAGGGGGC  
GAGTGTTATTTCATAGTGATTGGGCGTAAAGGGTACGTAGACGGTATATTAAGTTTTTAAT  
TAAATTCCATAGCACAACTATGGTAAATTAAAAAGACTGGCATACTAGAGTTTAGGGGAA  
GTTCTGTGGTATTCTTAGAGTAGAGGTAATAATCATTGATTTTAAGGAGACCCCCGATGGC  
GAAGGCAACGAAGTATCTTAGACTGACGTTGAGGTACGGGGGCGTGGGGAGCAAACAGGA  
TTAGAAACCCCTCGTAGTCC

>Otu19407

CCAGCCTACGGGAGGCAGCAGTGGGGAATCTTGACACAATGGGCGAAAGCCTGATGCAGCA  
ACGCCGCGTGAGGGAAGAAAGCCTTCGGGTGTAAACCTCTTTCAGTTGGGAAGAAGGTC  
ACGTCAATTTAATAGATGGCGGACTGACGGTACCTTCAGAAGAAGCCCCGGCTAACTACGT  
GCCAGCAGCCGCGGTAATACGTAGGGGGCAAGCGTTGTCCGGAATCATTGGGCGTAAAGA  
GCGTGTAGGCGGTTTCGATAAGTTCGCTGTGAAAGTCGGAGGCTTAACCTTCGAAAGCCGG  
TGAATACTGTGAGCTAGAATCCGGAAGAGGCGGGTGGAATTCCTGGTGTAGCGGTGAAA  
TGCGCAGATATCAGGAGGAACACCAATGGCGAAGGCAGCCCGCTGGGACGGTATTGACGC  
TGAGACGCGAAAGCGTGGGGAGCAAACAGGATTAGATAACCCCGTAGTCC

>Otu19411

CCAGCCTACGGGGCGCTCCAGTGGGGAATTTTCGGGCAACGAACTAACGTTTGACCCAGTG  
AGAACACATGCATGATGAATGCGTCAAGTTTTCTGTAAAGTGCTTTTCGCGGCCCGACGA  
CAAAGACTGTAGGCTGAGAAGAAGTGCCGGCCAACCTCCGTGCCAGCAGCTGCGGTAAGAC  
GGAGGGCGCGGGCGTTATTCTGCTTTGATTGGGCGTAAAGGGTGTGTAGGTTGCTTTTAGT  
TTTTTGATCAAAAGAGCGGGGCGCTCCTCTGCGAGGGTCTTCTAAAAAGAAAGCTTGTGT  
TGGGTGGAGGTGTAGTTAAATGTCTGTTTAAGGGTTACATCTTGGGAAATAGGTTTGAAA  
TCGTGCTTGCGAAGGCGCTTATCCATGCCCAACAGACGCTGAGACACGGAAGCTTAGGTA  
GCAAACAGAATTAGAAACCCGCGTAGTCC

>Otu19422

CCAGCCTACGGGGGGCAGCAGTGGGGAATATTGGACAATGGGCGCAAGCCTGATCCAGCA  
ATGCCGCGTGAGTGAAGAAGGCCCTCTGGGTGTAAACTTCTTTTATCTGGGACGAAAAA  
AGGGGATTCTTCCCCACTTGACGGTACCAGAGGAATAAGCACCGGCTAACTCCGTGCCAG  
CAGCCGCGGTAATACGGAGGGTGCAAGCGTTATCCGGATTACTGGGTTTAAAGGGTGCG  
TAGGTGGGTATGTAAGTCAGTGGTGAAATCTTCGAGCTTAACTCGGAACTGCCATTGAT  
ACTATATATCTTGAATATCCTGGAGGTAAGCGGAATATGTCATGTAGCGGTGAAATGCTT  
AGATATGACATAGAACACCCATTGCGAAGGCAGCTTACTACGGGATTATTGACACTGAGG  
CACGAAAGCGTGGGGATCAAACAGGATTAGAAACCCAGTAGTCC

>Otu19463

CCAGCCTATGGGATGCTCCAGTGGAGAATCTTGACACAATGGAGGAACTCTGATGCAGCG  
ACGCCGCGTGAACGATGAAGCCCTTCGGGGTGTAAGTTCTTTTCGACGGGAACGATAATG  
ACGGTACCCGAAGAAGAAGCTGCGGCTAACTACGTGCCAGCAGCCGCGGTAATACGTAGG  
CAGCAAGCGTTGTTCCGAATCACTGGGCGTAAAGAGTGCGTAGGCGGTGCTCTAAGTCTG  
TTGTGAAATCTCCCGGCTTAACTGGGAGGGTGACAGCGGAACTGGAGTGCTTGAGGGTGG  
GAGAGGTAAGCGGAATTCCTGGTGTAGCGGTGAAATGCGTAGATATCAGGAGGAACACCG  
GTGGTGTAAACGGCTTTCTGGACCACTTCTGACGCTGAGGCACGAAAGCGTGGGTAGCAA  
ACAGGATTAGAGACCCCTATAGTCC

>Otu19464

CCAGCCTATGGGTGGCACCAGTAGGGAATCTTCCACAATGGGCGAAAGCCTGATGGAGCA  
ACGCCGCGTGAGTGAGGAAGGCTTTTCGGGTCGTAAAGCTCTGTTGCCAGGGAAGAATAAG  
AGCCAGTTAACTGCTGGTTCGATGACGGTACCTGAGAAGAAAGCCCCGGCTAACTACGTG  
CCAGCAGCCGCGGTAATACGTAGGGGGCAAGCGTTGTCCGGAATTATTGGGCGTAAAGCG  
CGCGCAGGCGGCTCTTTAAGTCTGGTGTCTAAGTGCGGGGCTCAACCCCGTGATGCACTG  
GAAACTGGGGAGCTTGAGTGCAGAAGAGGAGAGCGGAATTCACGTGTAGCGGTGAAATG  
CGTAGAGATGTGGAGGAACACCAGTGGCGAAGGCGGCTCTCTGGACTGTAAGTGGCGCTG  
AGGCGCGAAAGCGTGGGGAGCAAACAGGATTAGATACCCCGTAGTCC

>Otu19465

CCAGCCATGGGAGGCTGCAGTGGGGAATATTGGACAATGGGCGAAAGCCTGATCCAGCCA  
TGCCGCGTGAGTGATGAAGGCCTTAGGGTTGTAAACCTCTTTTCAGTGCCGACGAAGCGTG  
AGTGACGGTAGGCATAGAAGAAGGACCGGCCAACTACGTGCCAGCAGCCGCGGTAATACG  
TAGGGTCCGAGCGTTGTCCGGAATTACTGGGCGTAAAGAGCTCGTAGGTGGTTTTGTGCGG  
TTGTTTCGTGAAAACCTCACAGCTCAACTGTGGGCGTGCGGGCGATACGGGCAGACTGGAGT  
ACTGCAGGGGAGACTGGAATTCCTGGTGTAGCGGTGGAATGCGCAGATATCAGGAGGAAC  
ACCGGTGGCGAAGGCGGGTCTCTGGGCAGTAAGTACGCTGAGGAGCGAAAGCGTGGGGA  
GCGAACAGGATTAGAAACCCCTTGTAGTCC

>Otu19475

CCAGCCTATGGGTGGCAGCAGTGGGGAATTTTGGACAATGGGCGAAAGCCTGATCCAGCA  
ACTCTGCGTGAGGGACGAAGGTCTTCGGATCGTAAACCTCTTTTGTAAGGGACGAAATCC  
CGCAAGGGTCTGACGGTACCATAACGAATAAGCCACGGCTAACTATGTGCCAGCAGCCGCG  
GTAAGACATAGGTGGCGAGCGTTATTCGGAATTACTAGGCGTAAAGCGAGTGTAGGCGGA  
CTCTTAAGTCTGACGTTAAATCTCCTGGCTTAACTAGGAGCTGTCGTCGGATACTGAGAG  
CCTCGAATGGAGTAGGGGGCAGGGGAATTCCTGGTGTAGCGGTGAAATGCGTAGATATCG  
GGAGGAACACCTATGGCGAAAGCACCTGCCTGGGCCTCTATTGACGCTAAGACTCGAAAG  
CTGGGGGAGCAAACAGGATTAGAGACCCAGTAGTCC

>Otu19479

CCAGCCTATGGGGTGCTGCAGTAAGGAATATTGGTCAATGGACGCAAGTCTGAACCAGCC  
ATGCCGCGTGAGAGGATGAAGGTCCTCTGGATTGTAAACTGCTTTTGCAGGGGAATAAACC  
CAGATACGTGTATCTGGCTGAATGTACTCTGAGAATAAGGATCGGCTAACTCCGTGCCAG  
CAGCCGCGGTAATACGGAGGATCCAAGCGTTATCCGGATTTATTGGGTTTAAAGGGTGCG  
TAGGCGGCCTATTAAGTCAGGGGTGAAAGACGGTAGCTTAACTATCGCAGTGCCTTTGAT  
ACTGATGGGCTTGAATGGACTAGAGGTAGGCGGAATGTGACAAGTAGCGGTGAAATGCAT  
AGATATGTCACAGAACACCAATTGCGAAGGCAGCTTACTATGGTTTAAATTGACGCTGAGG  
CACGAAAGCGTGGGGATCAAACAGGATTAGAAACCCCTTGTAGTCC

>Otu19484

CCAGCCTATGGGATGCTGCAGGCGCGAAAACTTTACAATGCGGGAAACCGTGATAGGGGA  
ACTCTGAGTGCCCGTTAAATCGGGCTGTCCATCAGTTTAAATAACTGGTGAAGAAAGGGC  
CGGGCAAGACCGGTGCCAGCCGCGCGGTAATACCGGCGGCTCGAGTGGTGGCCACTATT  
ACTGGGCTTAAAGCGTTCGTAGCTGGTTTGTAAAGTCTCTGGGGAAATCTTCCGGCTTAA  
CCGGAAGGCGTCTCAGGGATACTGGCAGACTAGGGACCGGGAGAGGCGAGGGGTACTCCA  
GGGGTAGGAGTGAAATCCTGTAATCCTAGAAGGACCACCGGTGGCGAAGGCGTCTGACTA  
GAACGAATTTCGACGGTGAGGAACGAAGCCCTGGGGCACGAACCGGATTAGATACCCGAGT  
AGTCC

>Otu19486

CCAGCCTACGGGGTGCTGCAGTAGGGAATATTGCACAATGGGCGAAAGCCTGATGCAGCA  
ACGCCGCGTGACAGATGAAGGCCTTCGGGTCGTAAAGTGCTTTTCTGAGAGATGAGATAG  
GACAGTATCTCAGGAATAAGTCTCGGCTAACTACGTGCCAGCAGCCGCGGTAAAACGTAG  
GAGGCGAGCGTTATCCGGATTCACTGGGCGTAAAGCGCGTGCAGGCGGTTCCGTAAGTTG  
GGCGTGAAGTCTCCTGGCTTAACTAGGAGAGGTTCGTTCAATACTACCAGACTAGAGGGCA  
GTAGAGGAAGATGGAATTCCTGGTGTAGTGGTGAATGCGTAGATATCGGGAGGAACACC  
TGTGGCGAAAGCGGCGCACTGGACCACTACTGACGCTGAGGCGCGAAAGCTAGGGGAGCA  
AACAGGATTAGAAACCCGGGTAGTCC

>Otu19495

CCAGCCTACGGGGGGCAGCAGTGGGGAATATTGGGCAATGGGCGAAAGCCTGACCCAGCG  
ACGCCGTGTGGGCGATGAAGGCCTTCGGGTTGTAAAGCCCTGTTGGGTGGAAAGAAGGAC  
CTGTGACGAATAATCTTCAGGTCTTGACGGTACCACCAGAGGAAGCACCGGCTAACTCC

GTGCCAGCAGCCGCGGTAATACGGAGGGTGCAAGCGTTGTTTCGGAATCACTGGGCGTAAA  
GCGCACGCAGGCGGATTGATAAGTCAGGGGTGAAATCCCGGGGCTCAACCTCGGAATTGC  
CTTTGATACTGTTAGTCTTTGAGTTTCGGGAGAGGTTGGCGGAATTCCCTAGTGTAGAGGTG  
AAATTCGTAGATATTAGGAAGAACACCAGTGGCGAAGGCGGCCAACTGGCCCGATACTGA  
CGTCTCATGTGCGAAAGCGTGGGGAGCAAACAGGATTAGATACCCTAGTAGTCC

>Otu19513

CCAGCCTACGGGGCGCACCAAGCTAAGAATATTCGACAATGGGCGAAAGCCTGATCGAGCG  
ACGCCGCGTGCAGGATGAAGGCCTTCGGGTCGTAAACTGCGGTAGTAACATAACAATGTA  
AATGAGTGTGTTACGGAAAGAGGTGGGTAACCTACGTGCCAGCACCAAGCGGTAAAACGTAG  
ACCTCGAGCGTTATCCGGATTTATTGGGCGTAAAGCGCGTGTAGGCGGTTTCGTGCGTCT  
TCTGTTAAAGCCCGGGGCTAACCCCGGAAAGTGCAGGAGATACGGCGGAACTAGAGGAGG  
TTAGAGGTGCATGGAACGCACGGTGTAGGGGTGAAATCCGTTGATATCGTGCAGAACACC  
AAAGGCGAAGGCAGTGCCTGGGACCTTTCTGACGCTGAGCCGCGAAAGCTGGGGGAGCA  
AACCGGATTAGAGACCCGCGTAGTCC

>Otu19537

CCAGCCTATGGGGGGCAGCAGTGGGGAATATTGGGCAATGGGCGAAAGCCTGACCCAGCC  
ACGCCGCGTGAGTGATGAAGGCCTTCGGGTCGTAAAGCTCTGTGGGGAGGGACGAACAAG  
CGCGTACCAAATAAGTGCCTGCCCTGACGGTACCTCCTTAGCAAGCACCGGCTAACCATG  
TGCCAGCAGCCGCGTAATACATGGGGTGCAAACGTTGCTCGGAATTATTGGGCGTAAAG  
AGCGTGTAGGCGGCTGGACAAGTCAGATGTGAAAGCCCTGGGCTTAACCTAGGAAGTGCA  
TTTGAAGCTGTCCGGCTTGAGTAAGGGAGAGGAAAGTGGAATTCCTGGTGTAGAGGTGAA  
ATTCGTAGATATCAGGAGGAACACCGGTGGCGAAGGCGACTTTCTGGCCCTATACTGACG  
CTGAGACGCGAAAGCGTGGGAGCAAACAGGATTAGATACCCGCGTAGTCC

>Otu19540

CCAGCCTACGGGACGCACCAGTGGGGAATTTTTCGCAATGGGGGAAACCCTGACGCAGCA  
ACGCCGCGTGAGGATGAAGTACTTCGGTACGTAAACTCCTTTTCGATCGGGACGATAATG  
ACGGTACCGGAAGAAGAAGCCCCGGCTAACTTCGTGCCAGCAGCCGCGGTAATACGAGGG  
GGGCAAGCGTTGTTTCGGAATTATTGGGCGTAAAGCGCGTGTAGGCGGTTTTTTAAGTCTG  
ATGTGAAAGCCCTGGGCTCAACCCGGGAAGTGCATTGGAAACTGGGAGACTTGAATACGG  
GAGAGGGTAGTGGAATTCCTGGTGTAGGAGTGAAATCCGTAGATATCAGGAGGAACACCG  
GTGGCGAAGGCGGCTCACTGGCCCGATACTGACGCTGAGGTGCGAAAGCGTGGGGAGCAA  
ACAGGATTAGAAACCCCCGTAGTCC

>Otu19548

CCAGCCTATGGGGTGCTGCAGTCGAGAATCTTCGGCAATGGGCGCAAGCCTGACCGAGCG  
ACGCCGCGTGCGGGATGAAGGCCTTCGGGTGTAAACCGCTGTCAGTGCGGAGGAAATAT  
AGGGGGGTACTCCCCTCTATTTGACCTATGCGCAGAGGAAGGACGGGCTAAGTTCGTGCC  
AGCAGCCGCGGTAAGACGAACCGTCCAAACGTTATTTCGGAATTACTGGGCTTAAAGGGTG  
CGTAGGCGGTCTGTAAAGTTGAGTGTGAAAGACCTCGGCCTAACCGAGGAATGGCGCCCA  
AAACTAGCGGACTTGAGTAAGGCAGAGGTGAACGGAACCTAGGGTGGAGCGGTGAAATGC  
GTTGATATCCTAAGGAACACCAGTAGCGAAAGCGGCTCACTGGGTCTCTTCTGACGCTGA  
GGCACGAAAGCTAGGGGAGCGAAGAGGATTAGATACCCGAGTAGTCC

>Otu19561

CCAGCCTACGGGTTGCTCCAGTGGGGAATTTTTCTCAATGGGGGAAACCCTGAAGGAGCG  
ACGCCGCGTGGGGGATGAATGGCTTCGGCCCGTAAACCCCTGTCATTTCGGAACAATGTT  
CCGGCATTAAATACCGCCGGGATTGATAGTAGCGGAAGAGGAAGGGACGGCTAACTCTGTG  
CCAGCAGCCGCGTAATACAGAGGTCCCAAGCGTTGTTTCGATTCACTGGGCGTAAAGGG  
TGCGTAGGTGGTGGGTAAGTTTGATGTGAAATCTCCGGGCCTAACCCGGAATGGCATT  
GAATACTATTTCGGCTGGAGGGTTGGAGGGGGGACTGGAATTCCTCGGTGTAGCAGTGAAAT  
GCGTAGATATCGAGAGGAACACCAGTGGCGAAGGCGAGTCCCTGGACAACCTCTGACACT  
AAGGCACGAAAGCTAGGGGAGCAAACAGGATTAGAAACCCCTGTGTCC

>Otu19565

CCAGCCTACGGGACGCAGCAGTTAGGGAATTTTGACAATGGGCGCAAGCCTGATCGAGTG  
ACGCCGCGTGTGGGACGGAGCCCTTCGGGGTATAAACCACTTTTCTCGGGGACGAGTTTC  
GGACGGTACCCGAGGAATAAGCCTCGGCTAACTACGTGCCAGCAGCCGCGGTAATACGTA  
GGAGGCGAGCGTTGTCCGGAATTACTGGGCGTAAAGCGCGCGTAGGCGGTCCCTTGCGTA  
GGCGGTGAAAGCTCCCGGCTCACCTGGGGGAGGGCCGCTAAACGGGGGGACTTTGAGGG  
CGGTAGGGGCTGGCGGAACGCCCGGAGTAGCGGTGAAATGCGTTGAGATCGGGCAGAACA  
CCAGTGGCGAAGGCGGCCAGCTGGGCCGTCCCTGACGCTGAGGCGCGAAAGCGTGGGGAG

CGAACCGGATTAGAAACCCGGGTAGTCC

>Otu19593

CCAGCCTACGGGGTGCTCCAGTCGAGAATATTTCGACAATGGGCGAAAGCCTGGTCGAGCG  
ACACCGCGTGCAAGGATGAAGGCCTTCGGGTCTGTAAGTGCAGTAAAGTCAGCAATGTA  
AATGAGCAACTTACGGAAAGAGGTGGGTAAGTACGTGCCAGCACCAGCGGTAAACGTAG  
ACCTCAAGCGTTATCCGGATTATTGGGCGTAAAGCGTGTGTAGGTGGCTTCGCGCGTCT  
TCTGTTAAAGCCCAGGGCCTAACCTGGAAGTGCAGGAGATACGGCGGAACTAGAGGAGG  
TTAGAGGTGCATGGAACGCACGGTGTAGGGGTGAAATCCGTTGATATCGTGCAGGAATACC  
AAAGGCGAAGGCATTGCACTGGGACCTTCCTGACACTGAGACACAAAAGCCAGGGGAGCA  
AACGGGATTAGAAACCTAGTAGTCC

>Otu19597

CCAGCCTATGGGGGGCACCAGTCGAGGATCTTCGGCAATGGGCGCAAGCCTGACCGAGCG  
ACGCCGCGTGTGCGATGAAGGCCTTCGGGTGTAAAGCACTGTGAGGGGGAGGAAAGCC  
CGCAAGGGTCTGACTAATCCCTGGAGGAAGCACGGGCTAAGTTCGTGCCAGCAGCCGCGG  
TAAGGCGAACCGTGCAACGTTGTTTCGGAATCACTGGGCTTAAAGGGCGCGTAGGCGGGT  
GGCCAAGTCAGGGGTGAAATCTTTCGGCTCAACCGGAAAACAGCTTCTGATACTGGTCGT  
CTTGAGTGAGGTAGGGGCATGTGGAACCTTCGGGTGGAGCGGTGAAATGCGTAGATATCGG  
AAGGAACGCCGCTGGCGAAAGCGACGTGCTGGACCTCTTCTGACGCTGAGGCGCGAAAGC  
TAGGGGAGCAAACGGGATTAGATACCCTAGTAGTCC

>Otu19600

CCAGCCTATGGGTGGCAGCAGGCGCGAAAACCTTTACAATGCGGGAAACCGTGATAAGGGA  
ACTCCGAGTGCCCGTAAATCGGGCTGTCCATCTGTTTAAATAACAGGTGAAGAAAGGGC  
CGGGCAAGACCGGTGCCAGCCGCCGCGGTAATACCGGCGGCTCGAGTGGTGGCCACTATT  
ACTGGGCTTAAAGCGTTCGTAGCTGGTTTGTAAAGTCTCTGGGGAAATCTTCCGGCTTAA  
CCGGAAGGCGTCTCAGGGATACTGGCAGACTAGGGACCGGGAGAGGTGAGGGGTACTCCA  
GGGGTAGGAGTGAAATCCTGTAATCCTTGGGGGAACACCTGTGGCGAAAGCGGCTCACTG  
GACCATAACTGACGCTGAGGCACGAAAGCTAGGGGAGCAAACAGGATTAGAGACCCGAGT  
AGTCC

>Otu19615

CCAGCCTATGGGTGCAACCAGTAGGGAATATTGGTAATCTGCGAAAGCGGGAACCAGCAA  
CGCCGCGTGTGCGATGAAGGCCTTCGGGTCTGTAAGCACTTTTTGAGGGGACGAGGAAGG  
ACGGTACCCTCAGAATAAGTCTCGGCTAACTACGTGCCAGCAGCCGCGGTAACACGTAGG  
AGACGAGCGTTATCCGGATTTACTGGGCGTAAAGCGCGTGCAGGCGGTTTGGTAAGTTGG  
ATGTGAAAGCTCCTGGCTTAACTGGGAGAGGTCGTTCAATACTGCCAGACTAGAGGATGG  
TAGAGGGAGGTGGAATTCTGGGTGTAGTGGTGAAATGCGTAGATATCAGGAGGAACACCG  
GCGGTGTAGACGGCTTACTGGACCATGACTGACGCTGAGGCACGAAAGCGTGGGGAGCAA  
ACAGGATTAGAGACCCCTGTAGTCC

>Otu19619

CCAGCCTACGGGATGCTGCAGTGGGGAATATTGGACAATGGGGGCAACCCTGATCCAGCC  
ATGCCGCGTGAGTGAAGAAGGCCTTAGGGTTGTAAAGCTCTTTTGGCGGGGACGATAATG  
ACGGTACCCGCGAGAATAAGCCCCGGCTAACTTCGTGCCAGCAGCCGCGGTAATACGAAGG  
GGGCTAGCGTTGTTTCGGAATCACTGGGCGTAAAGCGCACGCAGGCGGATTGATAAGTCAG  
GGGTGAAATCCCGGAGCTCAACTTCGGAATTGCCTTTGATACTGTCTATCTTCGAGTTTCG  
GGAGAGGTTGGCGGAATTCCCTAGTGTAGAGGTGAAATTCGTAGATATTAGGAAGAACACC  
AGCTGCGAAGGCGGTCTCCTGGCCCAATACTGACGCTGAGGCTCGAAAGCTAGGGGAGCG  
AACAGGATTAGATACCCGCGTAGTCC

>Otu19620

CCAGCCTACGGGTCGCAGCAGTGGGGAATCTTGACAATGGGGGAAACCCTGATGCAGCG  
ACGCCGCGTGAGCGATGAAGCCCTTCGGGTGTAAAGCTCTTTCGGCAGGGACGATTATG  
ACGGTACCTGCAGAAGCAGCTGCGGCTAACTACGTGCCAGCAGCCGCGGTAATACGTAGG  
CAGCAAGCGTTGTTTCGGAGTTACTGGGCGTAAAGGGTGTGTAGGCGGCCTGTAAAGTTCC  
GTGTGAAATCTCCCGGCTCAACCGGGAGGGTGCGCGGAAAACCTGGCGGGCTAGAGTACGG  
GATGGGAGAGTAGAATTCCTGGTGTAGCGGTGAAATGCGTAGATATCAGGAGGAATACCG  
GTGGTGTAGACGGCTCTCTGGACCGTAACCTGACGCTGATGCACGAAAGCTAGGGGAGCAA  
ACAGGATTAGAGACCCCAGTAGTC

>Otu19625

CCAGCCTACGGGAGGCTGCAGTCGGGAAACCTTTTGCAATACACGAAAGTGTGACAAAGCA  
AGCCAGAGTGCTGTTCTATATTTGAACAGCTTTTGTGAGATGTAAAAAGTCTTACGAATA



AGGACTGGGCAAGACTGGTGCCAGCCGCCGCGGTAATCCCAGCAGTCCAAGTCGCAGCCA  
CATTTGTTGGGTCTAAAACATCCGTAGCTTGCCTTTTAAGTCTCTTGTGAAATCAGGCCCT  
CTTAAGGGTCTGGCGGGCAAGAGATACTGTTTGGCTAGGGACCGGGAGGCGTAAGAGTA  
CAGACAGGGTAGCGGTAAATGCGTTGATCCTGTTTGGACTAACAGTCGCGAAGGCGCTT  
TACGAGAACGGTTCTGACAGTGAGGGATGAAGGCTAGGGGCGCAAAGTGGATTAGAGACC  
CCAGTAGTCC

>Otu19633

CCAGCCTATGGGATGCAGCAGCTAAGAATCTTCCGCAATGGGCGAAAGCCTGACGGAGCG  
ACGCCGCGTGACGATGAAGGCGTTATGCGTTGTAAAGCCCTTTTTCTATAGAAGAATAA  
GCCATCAGGAAATGGATGGTGATGACTGTATATAGAGAATAAGCATCGGCTAATTACGTG  
CCAGCAGCCGCGGTAATACGTAAGATGCTAGCGTTATTCGGAATCACTGGGCGTAAAGGG  
TGCGTAGGCTGTCAATTAAGTCGGGTGTGAAATCCCACGGCTCAACCGTGGAAGTGCGCC  
CGAAACTGCTTGACTTGAGTTTGGGAAAGGAAAGCGGAATTCCTGGTGTAGGAGTGAAAT  
CTATAGATATCAGGAAGAACACCGGTGGCGAAGGCGGCTTTCTGGCCTAAAACTGACGCT  
GAGGCACGAAAGCGTGGGGAGCAAACGGGATTAGAAACCCGAGTAGTCC

>Otu19639

CCAGCCTATGGGACGCTCCAGTGGGGAATTTTGCGCAATGGCCGCAAGGCTGACGCAGCA  
ACGCCGCGTGGGTGAAGAAGGCCTTCGGGTCGTAAAGCCCTGTCAGGTGGGAAGAATGGC  
TGGGGGACTAATAATCTCTCAGATTGACGGTACCACCAGAGGAAGCACCGGCTAACTCCG  
TGCCAGCAGCCGCGGTAACACGTAGGAGACGAGCGTTATCCGGATTTACTGGGCGTAAAG  
CGCGTGACGGCGGTTTGGTAAGTTGGATGTGAAAGCTCCCGGCTTAACTGGGAGAGGTGC  
TTCAATACTGCCAGACTAGAGGATGGTAGAGGGAGGTGGAATTCTGGGTGTAGTGGTGAA  
ATGCGTAGATATCCAGAGGAACACCAAGTGGCGAAAGCGGCCCTCTGGACCATTTCTGACG  
CTCATACGCGAAAGCTAGGGTAGCAAACGGGATTAGATAACCCCGTAGTCC

>Otu19666

CCAGCCTATGGGACGCTGCAGTAAGGGATATTGCGCAATGGGCGAAAGCCTGACGCAGCG  
ACGCCGCGTGAGGGACGAAGGCCTTCGGGTTGTAAACCTCTTTCAGCAGGGACGAAGCGA  
AAGTGACGGTACCTGCAGAAGAAGCACCGGCCAACTACGTGCCAGCAGCCGCGGTAATAC  
GTAGGGTGCAAGCGTTGTCCGGAATTATTAGGCGTAAGAGCTCGTAGGCGGTTTGTGCGG  
TCGGATGTGAAAACCTGAGGCTCAACCTCAGGCCTGCATTGATACGGGCAGACTTGAGT  
ACTGTAGGGGAGACTGGAATTCCTGGTGTAGCGGTGAAATGCGCAGATATCAGGAGGAAC  
ACCGGTGGCGAAGGCGGGTCTCTGGGCAGTAACTGACGCTGAGGAGCGAAAGCGTGGGGA  
GCGAACAGGATTAGAGACCCCGTAGTCC

>Otu19691

CCAGCCTATGGGTCGCTGCAGTGAGGAATATTGCACAATGGGCGAAAGCCTGATGCAGCG  
ACGCCGCGTGAGGATGAAGGTTTTCGGATCGTAAACTCCTGTTAAGTGGAAGAAAACG  
TGCTTTCTAATAAATAGCACGTCTGACGGTACCCTAGAGAAAGCACCGGCTAACTTCGT  
GCCAGCAGCCGCGGTAATACGAGGGGTGCAAGCGTTATTCGGAATAACTGGGCGTAAAGG  
GTGTGTAGACGGTATATTAAGCTTGCTGTAAACCCTCCGGCTCAACCGGAGATCAGCAG  
TGAGAACTGATAAACTAGAGTATGGAAGAGAGAAGTGGAATTCCTGGAGTAGCGGTAAAA  
TGCGTAGATCTCGGGAGGAACACCGATGGCGAAGGCAGCTTCTTGGTCCATTACTGACGT  
TGAGACACGAAAGCGTGGGGAGCAAACGGGATTAGATAACCCGAGTAGTCC

>Otu19700

CCGGCTATGGGGGGCTGCAGTAAGGAATCTTTCGCAATGGGGGCAACCCTGACGAAGCAA  
CACCGCGTGAGGATGAAGGCGTTTTCGTTGTAAACTCCTTTTTTGAGGGAATAAATCTG  
AAGGTACCTCAAGAATAAGCGACGGCTAACTACGTGCCAGCAGCCGCGTAAGACGTAGG  
TCGCAAGCGTTATCCGGAATTATTGGGCGTAAAGAGTTCGTAGGCGGCATGCTAAGTAGA  
ATGTTAAAGCCCAAGGCCTAACCTTGGTCCTGCATCCTAAACTGGCAAGCTAGAGTGAAA  
CAGAGGCAGGTAGAATTCTGTGTGTAGGGGTAAATATCCGTAGATATACAGAGGAATACCA  
AAAGCGAAGGCAGCCTGCTGGGTTTTACTGACGCTCAAGAACGAAAGCGTGGGGAGCAA  
ACAGGATTAGATACCCCTGTAGTCC

>Otu19721

CCAGCCTACGGGGTGCAGCAGTGGGGAATTTTGGACAATGGGCGAAAGCCTGATCCAGCA  
ATGCCGCGTGACGAAGAAGGCCTTCGGGTTGTAAACTGCTTTTGTACGGAACGAAAAAG  
CCTGCCCTAATACGGCTGGCTCATGACGGTACCCTAAGAATAAGCACCGGCTAACTACGT  
GCCAGCAGCCGCGGTAATACGTAGGGTGCGAGTGTTAATCGGAATTACTGGGCGTAAAGC  
GTGCGCAGGCGGTGATGTAAGACAGTTGTGAAATCCCCGGGCTCAACCTGGGAATTGCAT  
CTGTGACTGCATCGCTAGAGTACGGTAGAGGGGGGTGGAATTCGCGGTGTAGCAGTGAAA

TGCGTAGATATGCGGAGGAACACCGATGGCGAAGGCAATCCCCTGGACCTGTACTGACGC  
TCATGCACGAAAGCGTGGGGAGCAAACAGGATTAGATAACCGTGTAGTCC  
>Otu19724  
CCCAGCCTACGGGGTGCAGCAGTGGGGAATCTTGCACAATGGACGAAAGTCTGATGCAGC  
AACCCGCGTGGGGGATGAAGCTTCTCGGAGTGTAAACCCCTTCGACCCGGAAGAAAGC  
CCGCAAGGGTTTGACGGTACGGGTATAAGAAGCCCCGGCTAACTACGTGCCAGCAGCCGC  
GGTAAAACGTAGGGGGCCAGCGTTGCTCGGAATTACTGGGTGTAAAGGGTTCGTAGGCGG  
TGTGGCAAGTCGGGAGTGAAATCTCTGGGCTTAACCCAGAGACTGCTTCCGAACTGCTG  
TGCTTGAGTGTGGGAGAGGCGCGTGGAATTGCAGGTGTAGCGGTGAAATGCGTAGATATC  
TGCGGGAACACCCGTGGCGAAAGCGGCGAGCTGGATCACTACTGACGCTGAGGAACGAAA  
GCTAGGGGAGCAAACAGGATTAGAGACCCGAGTAGTCC  
>Otu19726  
CCAGCCTACGGGTGGCTGCAGTGAGGAATATTGCTCAATGGGGGAAACCCTGAAGCAGCA  
ACGCCGCGTAAAGGATGAAGGCGCTTTGCGTTGTAACTTTTGTAGTCGGGGACAAATTG  
TGGGTTACTACCCACTTGATGGTACCCGAAAAGTAAGGATCGGCTAACTACGTGCCAGCA  
GCCGCGGTAATACGTAGGATCCGAGCGTTGTCCGGATTTACTGGGTGTAAAGGGTGC  
GGCGGACTGGTAAGTCAGAGGTGAAATCTCGTCGCTTAACGACGAAACTGCCTTTGATAC  
TATCAGTCTTGAATCCGGTAGAGATCTGTGGAATTCCGAGTGTAGCAGTGAAATGTGTAG  
ATATTCGGAAGAACACCAAGTGGCGAAGGCAGCAGATTGGGCCGGTATTGACGCTCAGGCA  
CGAAAGCATGGGGATCAAACAGGATTAGATAACCCCTCGTAGTCC  
>Otu19740  
CCAGCCTACGGGATGCACCAGTCGAGAATTTTTCAATGGGCGAAAGCCTGATGGAGCG  
ACGCCGCGTGGGGGATGAATGGCTTCGGCCGTAACCCCTGTCATTTGCGAACAAATTA  
TTTCACCTAACACGTGACGTATTGATAGTAGCGAAAGAGGAAGGGACGGCTAACTCTGTG  
CCAGCAGCCGCGGTAATACAGAGGTCCCAAGCGTTGTTCCGATTCACTGGGCGTAAAGGG  
TGCGTAGGTGGCGGGGTAAGTCGGATGTGAAATCTCCGAGCTCAACTCGGAAAATGCATT  
GGAAACTGCCTTGCTCGAGGGTTGGAAGGGGGACTGGAATACTTGGTGTAGCAGTGAAAT  
GCGTAGATATCAAGTGGAACACCAAGTGGCGAAGGCGAGTCCCTGGACAACTCCTGACACT  
GAGGCACGAAAGCTAGGGGAGCAAACAGGATTAGAAACCCTGGTAGTCC  
>Otu19758  
CCAGCCTATGGGAGGCTGCAGTGAGGAATATTGGTCAATGGACGCAAGTCTGAACCAGCC  
ATGCCGCGTGGAGGATGAAGGCCTTCGGGTGTAAACTCCTGTCGAGGGGGAGGAAGGGG  
TAACCTTGACCGATCCCTGGAGGAAGCACGGGCTAAGTTCGTGCCAGCAGCCGCGGTAAG  
ACGAACCGTGCTAACGTTATTTCGGAATCACTGGGCTTAAAGCGCGTGTAGGCGGATGGGG  
ACGTCGGTTGTTGAAAGCCCCCGGCTCAACCGGGGAACTGGCACCAGAAACGCCCCGTCTG  
GAGGGACGTAGGGGGACCTGGAACCTCCGGTGGAGCGGTGAAATGCGTTGAGATCGGAAG  
GAACGCCCGTGGCGAAAGCGAGGTCCTGGACGTTTTCTGACGCTGAGACGCGAAAGCTAG  
GGGAGCGAACGGGATTAGAAACCCTGTAGTCC  
>Otu19769  
CCAGCCTATGGGTTGCTGCAGTAAGGAATATTGGACAATGGGGGCAACCCTGATCCAGCC  
ATGCCGCGTGAAGGATGAAGGTGCTCTGCATCGTAAACTTCTTTTATACGGGAATAACAT  
CCGCCTGATTGGCGGACAGAATGTACTGTAAAGAATAAGGATCGGCTAACTTCGTGCCAGC  
AGCCGCGGTAATACGAAGGATCCAAGCGTTATCCGGATTTATTGGGTTTAAAGGGTGC  
AGGCGGCTTATTAAGTCAGTGGTGAAGCCCCGAGCTCAACTCGGGAATTGCCATTGATA  
CTGATGAGCTTGAGTACACTTGAGGTAGGCGGAATGTGTCATGTAGCGGTGAAATGCTTA  
GATATGACACAGAACACCGATTGCGAAGGCAGCTTACTAAAGTGTAAGTACGCTGAGGC  
ACGAAAGCGTGGGGATCAAACAGGATTAGAAACCCAGTAGTCC  
>Otu19771  
CCAGCCTACGGGGGGCAGCAGTCGAGAATTTTTCAATGGACGAAAGTCTGATGGAGCG  
ACGCCGCGTGGAGGATGAAGGTCCTTGGAATTGTAAACTCCTGTCACTGCAGAACAAGGCG  
GTACGATTGAACATTTTCGTACCGTTGATGGTATGCGGAGAGGAAGGGACGGATAACTCTG  
TGCCAGCAGCCGCGGTAAGACAGAGGTCCCGAGCGTTGTTCCGATTTCATTGGGCGTAAAG  
GGTGTGTAGGAGGCTAGGTAAGTCAGGTGTGAAATCTCACAGCTTAACTGTGAAACTGCG  
CTTGATACTGCTTGGCTAGAGGATCGGAGGGGGTATCGGAATTTATGGTGTAGCAGTGAA  
ATGCGTAGATATCATAAGGAACACCGGTGGCGAAGGCGGATACCTGGAAGATTCTGACT  
CTGAAACACGAGAGCCAGGGGAGCAAACGGGATTAGATAACCTGGTAGTCC  
>Otu19773  
CCAGCCTACGGGGCGCACCCAGACGAGAATATTCGCAATGGACGAAAGTCTGATGGAGCG

ACGCCGCGTGGAGGATGAAGGTTTTTCGGATTGTAACTCCTGTCTCTGCAGAACAAGGCT  
AGGTGATTGAATAGATCATCTAGTTGGTGGTATGCGGAGAGGAAGGGACGGCTAACTCCG  
TGCCAGCAGCCGCGGTAAGACAGAGGTCCCGAGCGTTGTTTCGGATTTCATTGGGCGTAAAG  
GGTGTGTAGGAGGTTGGGTAAGTCAGGTGTGAAATCTCAGAGCTTAACTCTGAAACTGCG  
CTTGATACTGCTCGGCTAGAGGATCGGAGGGGGTATCGGAATTTATGGTGTAGCAGTGAA  
ATGCGTAGATATCATAAGGAACACCGGTGGCGAAGGCGGATACCTGGAAGATTCTCTGACT  
CTGAAACACGAAAGCCAGGGGAGCAAACGGGATTAGAGACCCTAGTAGTCC

>Otu19781

CCAGCCTACGGGTCGCAGCAGTGGGGAATATTGGACAATGGGGGCGACCCTGATCCAGCG  
ATGCCGCGTGTGTGAAGAAGGCCTGCGGGTTGTAAAGCACTTTCGGTGGTGAGGAGGGTC  
GAGTGGATGAATAAGCCACTTGACTGACGCTAGCCACAAAAGAAGCACCGGCTAACTCTG  
TGCCAGCAGCCGCGGTAATACAGAGGGTGCAGCGTTAATCGGAATTACTGGGCGTAAAG  
CGCGCGTAGACGGTTTTTGTAAAGTCAGATGTGAAATCCCTGGGCTCAACCTGGGAACTGCA  
TTTGAGACTGCATGGCTAGAGTATCGAAGAGGGGAAGTGGAATTTCCGGTGTAGCGGTGAA  
ATGCGTAGATATCGGAAGGAACACCAGTGGCGAGAGCGACTTCCTGGTGAATACTGACG  
TTCATGTGCGAAAGCGTGGGGAGCAAACAGGATTAGAAACCCAGTAGTCC

>Otu19788

CCAGCCTATGGGTGGCAGCAGTGGGGAATATTGGACAATGGGCGAAAGCCTGATCCAGCC  
ATGCCGCGTGAATGATGAAGGCCTTAGGGTTGTAAAGTCTTTTGTGAGGGAAGATAATG  
ACGGTACCTGGAGAAGCAGCTGCGGCTAACTACGTGCCAGCAGCCGCGGTAATACGTAGG  
CAGCGAGCGTTGTTTCGGAGTTACTGGGCGTAAAGGGTGTGTAGGCGGTTATTTAAGTTTG  
GTGTGAAATCTCCCGGCTCAACTGGGAGGGTGCGCCGAATACTGAATGACTTCGAGTGCG  
GGAGAGGAAAGTGGAATTCCTGGTGTAGCGGTGAAATGCGTAGATATCAGGAGGAACACC  
GGTGGTGTAGACGGCTTTCTGGACCGTAACTGACGCTGAGACACGAAAGCGTGGGTAGCA  
AACAGGATTAGATACCCTAGTAGTCC

>Otu19793

CCAGCCTACGGGTGGCACCAGTGGGGAATCTTGGACAATGGGCGAAAGCCTGATCCAGCC  
ATGCCGCGTGAGTGATGAAGGCCTTAGGGTTGTAAAGCTCTGTGACGGGGACGATAATG  
ACGGTACCCGTAGAAGAAGCCCCGGCTAACTTCGTGCCAGCAGCCGCGGTAATACGAAGG  
GGGCTAGCGTTGATCGGAATTACTGGGCGTAAAGCGCACGTAGGCGGACATTCAAGTCGG  
GGTGAAAGCCTTGGGCTCAACCCAAGAATTGCCTTCGATACTGAATGTCTCGAGACCGG  
GAGAGGTGAGTGGAATTCGAGTGTAGAGGTGAAATTCGTAGATATTCGGAAGAACACCA  
GTGGCGAAGGCGGCTCACTGGCCCGGTTCTGACGCTGAGGTGCGAAAGCGTGGGGAGCAA  
ACAGGATTAGATACCCGAGTAGTCC

>Otu19799

CCAGCCTATGGGTTCGCAGCAGTGGGGAATCTTGCACAATGGGCGAAAGCCTGACGCAGCC  
ATGCCGCGTGATGATGAAGGTCTTAGGATTGTAAATACTTTCACCGGGGAAGATAATG  
ACGGTACCCGGAGAAGAAGCCCCGGCTAACTTCGTGCCAGCAGCCGCGGTAATACGAAGG  
GGGCTAGCGTTGCTCGGAATTACTGGGCGTAAAGGGCGCGTAGGCGGACAGTTTAGTCAG  
AGGTGAAAGCCCAGGGCTCAACCTTGGAATTGCCTTTGATACTGGCTGTCTTGAGTTCGG  
GAGAGGTGAGTGGAATGCCGAGTGTAGAGGTGAAATTCGTAGATATTCGGCGGAACACCA  
GTGGCGAAGGCGACTCACTGGCCCGATACTGACGCTGAGGCACGAAAGCCAGGGGAGCAA  
ACGGGATTAGAAACCCGAGTAGTCC

>Otu19820

CCAGCCTATGGGGTGCTCCAGACGAGAATATTGCACAATGGACGAAAGTCTGATCGAGCG  
ACGCCGCGTGGAGGATGAAGTCCTTCGGGATGTAACTCCTTTTGCAGGGAAGAAGTTA  
TTGACGGTACCTGGAGAATAAGAGGTTGCTAACTCGTGCCAGCAGCAGCGGTAATACGA  
GTGCCTCGAGCGTTATCCGGAATTATTGGGCGTAAAGGGTGCCTAGGTGGTCATGTTAGT  
CCGTTGTTAAATCTCCCGGCTCAACCGGGAATCTGCAATAGAAACGGCATGACTCAGAGG  
TTGGAAGAGGTCTCGCGGAATCATGGTGTAGCGGTGAAATGCGTTGATATCATGGGGAA  
CACCAAAGCGAAGGCAGCAGACTGGTCCACACCTGACACTGAAGCACGAAAGCGTGGGT  
CGCGAATGGGATTAGAAACCCCTGGTAGTCC

>Otu19831

CCAGCCTATGGGGGGCTGCAGTAACGAATCTTCCGCAATGCACGAAAGTGTGAAGGAGCA  
ACGCCGCGTGCAGGATGAAGGCCCTAGGGTTGTAACTGCTTTTATCTGTGACGAATATG  
ACGGTAGCAGATGAATAAGGATCGGCTAACTCCGTGCCAGCAGCCGCGGTCATACGGAGG  
ATCCAAGCGTTATCCGGAATTACTGGGCGTAAAGAGTTGCGTAGGTGGCATGATAAGTTG  
GTAGTGAAATACTGGGGCTCAACCCCTTACCCATTACCAAACCTGTCAAGCTAGAGGATG

AGAGAGGTTATTGGAATTCCTAGTGTAGGAGTGAAATCCGTAGATATTAGGAGGAACACC  
GATGGCGTAGGCAGATAACTGGCTCATTCCTGACACTAAGGCACGAAAGCGTGGGTAGCA  
AACGGGATTAGAAACCCCTTG TAGTCC

>Otu19833

CCAGCCTACGGGGTGCAGCAGTGGGGAATTGTTTCGCAATGGGCGCAAGCCTGACGACGCA  
ACGCCGCGTGAGGATGAAGACCTTCGGGTCGTAAACTCCTTTTCGATCGAGACGAATGGC  
TTCTGGGTGAATACCCTGGAAGATTGACGGTACCGAGAGAAGAAGCCCCGGCTAACTCCG  
TGCCAGCAGCCGCGGTAATACGGGGGGGGCAAGCGTTGTTTCGGAATTACTGGGCGTAAAG  
GGCTCGTGGGCGGCCAACTAAGTCAGACGTGAAATCCCTCGGCTTAACCGGGGAAGTGC  
TCTGATACTGGATGGCTTGAGATTGGGAGAGGGATGCGGAATTCCAGGTGTAGCGGTGAA  
ATGCGTAGATATCTGGAGGAACACCGGTGGCGAAGGCGGCATCCTGGACCAACACTGACA  
CTGAGGCACGAAAGCGTGGGGAGCAAACAGGATTAGAGACCCAGTAGTCC

>Otu19843

CCAGCCTACGGGGGGGACCAGTGGGGAATATTGGACAATGGGCGCAAGCCTGATCCAGCC  
ATGCCGCGTGAGTGATGAAGGCCTTAGGGTTGTAAAGCTCTTTTGTACAGGAAGATGATG  
ACGGTACCTGAAGAATAAGCACCGGCTAACTTCGTGCCAGCAGCCGCGGTAATACGAAGG  
GTGCTAGTGTTGTTTCGGAATCACTGGGCGTAAAGCGTGCGTAGGCGGCTTTCCAGGTGAG  
GGGTGAAATCCTGGGGCTCAACCCAGAATTGCCTTTGAAACTGGAAAGCTAGAGTACTG  
GAGGGGATAGCGGAATTCCTAATGTAGAGGTGAAATTCGTAGATATTAGGAGGAACACCG  
GTGGCGAAGGCGGCTATCTGGACGGTAACCTGACGCTCTGGCACGAAAGTGAGGGGATCAA  
ACAGGATTAGAAACCCCTGGTAGTCC

>Otu19846

CCAGCCTATGGGATGCACCAGTAAGGAATATTGGTCAATGGGCGAAAGCCTGAACCAGCC  
ATGCCGCGTGAGTGATGAAGGCCTCTGGGTTGTAAACTTCTTTTATATGGGACGAAAAA  
AGGGAATTCCTTCCCTCTTGACGGTACTGTATGAATAAGCACCGGCTAACTCCGTGCCAG  
CAGCCGCGGTAATACGGAGGGTGCAAGCGTTATCCGGATTCAGTGGGTTTAAAGGGTGCG  
TAGGCGGGTATGTAAGTCAGTGGTGAAATCCCGGAGCTTAACTCTGGAAGTGCCATTGAT  
ACTATATATCTTGAATATTGTGGAGGTTTGCGGAATATGTCATGTAGCGGTGAAATGCAT  
AGATATGACATAGAACACCTATTGCGAAGGCAGCAGGCTACACATATATTGACGCTGAGG  
CACGAAAGCGTGGGGATCAAACAGGATTAGAAACCCCTTG TAGTCC

>Otu19859

CCAGCCTACGGGGGGCAGCAGTCGAGGATCATTCGCAATGGGCGAAAGCCTGACGATGCG  
ACGCCGTGTGAGCGATGAAGGCCTTCGGGTTGTAAAGCTCTTTCGCCTGGGAACAAGAGA  
TTGCGGTGAATAACCGTGAGATTTGAGGGTACCAGGTAAAGAAGCACCGGCTAACTCCGT  
GCCAGCAGCTGCGGTAATACGGAGGGTGCAAGCATTAATCGGATTTATTGGGCGTAAAGG  
GCGTGTAGGCGGGTTAGTAAGTCGAGTGTGAAATTCCAAAGCTCAACTTTGGGACTGCAT  
TTGAAACTACTAGTCTGGAGGATTGGCGGAGAAAATGGAATTCACATGTAGTGGTGAAA  
TGCGTAGATATGTGGATGAACACCTGTGGCGGAAGCGGTTTTCTAGCTTATACCTGACGC  
TGAGGCGCGAGAGCAAGGGGAGCAAACAGGATTAGAGACCCCGGTAGTCC

>Otu19862

CCAGCCTACGGGGGGGACCAGTAGGGAATATTGCTCAATGGGGGAAACCCCTGAAGCAGCA  
ACGCCGCGTGAGTGATGAAGGCCTTCGGGTCGTAAAGCTCTGTTGTACGGGGCGAATGCT  
CTTAAAGATAACATCTTTAGGAAGTGACAGTACCGTATAAGAAAGGACCGGCTAACTTCG  
TGCCAGCAGCCGCGGTAAGACGGGGGGTCCAAGCGTTGTTTCGGAATCATTGGGCGTAAAG  
CGTGTGCAGGTGGTTTTGGTAAGTTGGATGTGAAAGCCCTGGGCTTAACCCAGGAAGTGCA  
TTCAAACTACCAAACCTTGAGTATGGAAGAGGGTCGTGGAATTCCAGGTGTAGTGGTGAA  
ATACGTAGATATCTGGAGGAACACCGGTGGCGAAGGCGGCGACCTGGTCCTATACTGACA  
CTCATAACAGAAAGCGTGGGGATCAAACAGGATTAGAAACCCCTGTAGTCC

>Otu19869

CCAGCCTATGGGGGGCAGCAGTGGGGAATCTTGCAATGGGGGCAACCCCTGATGGAGCG  
ACGCCGCGTGAGGATGAAGGTTTTCGGATTGTAAACTCCTGTCAACACAGAACAAGCAA  
TACAGTCTAACTAGCTGTAAAGTTGATAGTATGTGGGGAGGAAGGGACGGCTAACTCTGT  
GCCAGCAGCCGCGGTAATACAGAGGTCCCAAGCGTTGTTTCGGATTCAGTGGGCGTAAAGG  
GTGTGTAGGAGGTCGGATAAGTCTGATGTGAAATCCCGTCGCCTAACGACGGAAGTGCAT  
TGGATACTGTTTCGGCTAGAGAATCTGAGGGGGAAAGCGGAATTCCTGGTGTAGCGGTGAAA  
TGCGTAGATATCAAGAGGAACACCCGTGGCGAAAGCGGCTTCCTGGAAGATTTCCTGACTC  
TGAAACACGAAAGCCAGGGGAGCGAATGGGATTAGAAACCCCTCGTAGTCC

>Otu19875

CCAGCCTACGGGAGGGCTCCAGTCGAGGATCTTCGTCAATGGGCGCAAGCCTGAGCGAGCG  
ACGCCGCGTGCGCGATGAAGGCCCTTCGGGTGTAAAGCACTTTCGCTTGGAACAAGAGA  
GGTTGGCTAATATCCAGCCGATTTGAGGGTACCAGGTAAAGAAGCACCGGCTAACTCCGT  
GCCAGCAGCTGCGGTAATACGGAGGGTGCAAGCATTAATCGGATTTATTGGGCGTAAAGG  
GCGCGTAGGCGGGTGATAAGTCAGATGTGAAATCCCGGAGCTCAACTCCGGAACAGCATT  
TGAAACTATCAGTCTAGAGGGTAGGCGGAGAAAATAGAATTCACAAGTAGCGGTGAAAT  
GCGTAGATATGTGGAAGAATACCGGTGGCGAAGGCGATTTTCTAGCTTATACCTGACGCT  
GAGGCGCGAAAGCAAGGGGATCAAACAGGATTAGAGACCCCAGTAGTCC

>Otu19879

CCAGCCTACGGGTTGCAGCAGTGAGGAATTTTGCACAATGGGGGAAACCCTGATGCAGCA  
ACGCCGCGTGGGGGATGAAGGGGCTATGCCTCGTAAACTCCTGTCGGATGGGAAAAAAG  
CTATATGAATAGCTGGGATTGTACCATCAAAGGAAGGATCGGCTAACTACGTGCCAGCAG  
CCGCGGTAATACGTAGGATCCAAGCGTTGTCCGGGATTACTGGGTGTAAAGGGTGCGTAG  
GCGGACATGTGCGTCGAAGGTTAAAGACCACGGCTTAACCGAGGAAATGCCTTCGATACG  
GCAAGTCTTGAATGCGAGAGAGGTATGTAGAATTCTTGGTGTAGCGGTGAAATGCGTAGA  
TATCAGGAGGAATACCAGTGGCGAAGGCGGCATACTGGCTCGTTATTGACGCTGAGGCAC  
GAAAGCGTGGGGATCAAACAGGATTAGAGACCCGCGTAGTCC

>Otu19917

CCAGCCTATGGGTTGCAGCAGTGGGGAATATTGGACAATGGGCGAAAGCCTGATGGAGCG  
ACACCGCGTGAGGATGAAGGTCTTAGGGTTGTAAACTGCTTTTATCTGTGACGAATATG  
ACGGTAGCAGATGAATAAGGATCGGCTAACTCCGTGCCAGCAGCCGCGGTACATACGGAGG  
ATCCAAGCGTTATCCGGAATTACTGGGCGTAAAGAGTTGCGTAGGTGGCATGGTAAGTTG  
GTAGTGAATACTGGGGCTCAACCCCTTACACATTACCAAAACCGCCAAGCTAGAGGATG  
AGAGAGGTTATTGGAATTCCTAGTGTAGGAGTGAAATCCGTAGATATTAGGAGGAACACC  
GATGGCGTAGGCGGATAACTGGCTCATTCCTGACACTAAGGCACGAAAGCGTAGGTAGCA  
AACGGGATTAGAACCCGGGTAGTCC

>Otu19931

CCAGCCTATGGGGTGCAGCAGTGGGGAATTTTGCGCAATGGGGGAAACCCTGACGCAGCA  
ACGCCGCGTGAGGATGAAGTCCTTCGGGACGTAAACTCCTTTTACCAGGAAAGACTTAG  
GACGGTACCTGGTGAATAAGCACCGGCTAACTACGTGCCAGCAGCCGCGGTAAGACGTAG  
GGTGAAGCGTTGTCCGGATTTACTGGGCGTAAAGGGCGCGTAGGCGGCTCGTTAAGTGT  
GAAGTGAGATCCCTAGGGCTCAACCCAGGAAGTGTCTTACATACTGGCGGGCTTGAGGAT  
TGAAGAGGCTTGTGGAATTCCTGGTGTAGCGGTGAAATGCGTTGATATCAGGAGGAACAC  
CCATGGCGAAGGCAGCAAGCTGGTCAATTCCTGACGCTGAGGCGCGAAAGCGTGGGTAGC  
AAACAGGATTAGAGACCCTAGTAGTCC

>Otu19938

CCAGCCTATGGGGGGCACCAGTGGGGAATCTTGCGCAATGGACGAAAGTCTGACGCAGCG  
ACGCCGCGTGGGTGATGAAGGCCTTCGGGTGTAAAGCCCTGTGGGGAGAGACGAATAAG  
TCGGCGCTAACACCGACGGCGATGACGGTATCTCCTTAGCAAGCACCGGCTAACTCTGTG  
CCAGCAGCCGCGGTAAGACAGAGGGTGCAAACGCTGTTTCGGAATTACTGGGCGTAAAGCG  
TGTGTAGGCGGCCGCGCAAGTCGGATGTGAAGTCCCCGGGCTCAACCCGGGAAGTGCACC  
CGAAACTGCGTGGCTTGAGTACCGGAGAGGTTGGTGAATTCCTCGGTGTAGAGGTGAAAC  
TCGTAGATATCGAGAGGAACACCGGTGGCGAAGGCGGCCAACTGGACGAGTACTGACGCT  
GAGACACGAAAGCGTGGGGAGCAAACAGGATTAGAGACCCCTGTAGTCC

>Otu19941

CCAGCCTACGGGGCGCAGCAGTGAGGAATATTGCGCAATGGGCGAAAGCCTGACGCAGCG  
ACGCCGCGTGAGGATGAAGGTCTTTGGATTGTAAACTCCTGTTAAGTGAGAAGAAAGAC  
TTATTATTAATACCAATAGGTTATGACGGTACCACTAAAGATAGCACCGGCTAACCTCGT  
GCCAGCAGCCGCGGTAATACGAGGGGTGCAAGCGTTATTCGGATTAATTGGGCGTAAAGG  
GTGCGTAGACTGCATGTTAAGTTTGTGTAAATTCTTCGGCCTAACCGGGGGCAAGCAA  
TGAAAACCTGGCGTGCTAGAGGGTGGTAGAGAGAAGTGGAATTCCTCGGAGTAGCGGTAAAA  
TGCGTAGATCTCGGGAGGAACACCAATAGCGAAGGCAGCTTCTTGGTCCATTTCTGACGT  
TGAGGCACGAAAGCGTGGGGAGCAAACAGGATTAGAAACCCCGGTAGTCC

>Otu19949

CCAGCCTATGGGTGGCTGCAGTGGAATATTGGACAATGGGGGAAACCCTGATCCAGCAA  
TGCCGCGTGAGTGAAGAAGGTCTTCGGATTGTAAAGCTCTTTCGACGGGGACGATGATGA  
CGGTACCCGTTAGAAGAAGCCCCGGCTAACTTCGTGCCAGCAGCCGCGGTAATACGAAGGG  
GGCTAGCGTTGCTCAGAATTACTGGGCGTAAAGGGCGCGTAGGCGGTTACATACAGTCAGA

TGTGAAATTCTTGGGCTTAACCTGGGGGCTGCATTTGAGACGTATGGACTAGAGTATGGA  
AGAGGGTCGTGGAATTTCCAGTGTAGAGGTGAAATTCGTAGATATTGGAAAGAACACCGG  
TGGCGAAGGCGGCGACCTGGTCCATAACTGACGCTGAGGCGCGAAAGCGTGGGGAGCGAA  
CAGGATTAGATACCCAGTAGTCC

>Otu19953

CCAGCCTACGGGTGGCAGCAGTGAGGAATATTGGACAATGGGGGCAACCCTGATCCAGCC  
ATGCCACGTGAGTGATGAGGGCCTTCGGGTGTAAACTCTTTTAGATGTGACGATGATG  
ACGGTAACATCAGAAAAAGCTCCGGCTAACTTCGTGCCAGCAGCCGCGGTAATACGAAGG  
GAGCGAGCGTTGTTTCGGAATCACTGGGCTTAAAGCGTGCGTAGGCGGATTTTCAAGTCAG  
AAGTGAAATCCCGGGGCTTAACCCCGGAACTGCTTTTGAGACTGTAAGTCTGGAATTCGG  
TAGAGGTTAGTGGAATGTCTAGTGTAGAGGTGAAATTCGCAGATATTAGACGGAACACCA  
GTGGCGAAGGCGACTAACTGGACCGACATTGACGCTGAGGCACGAAAGCGTGGGTAGCAA  
ACAGGATTAGAGACCCTTGTAAGTCC

>Otu19958

CCAGCCTACGGGAGGCAGCAGTGAAAAAATCTGGACAATGCGCGACAGCGTGATCAGGTA  
ATATTTCTCAAGTGATGAAGGTCCAGTAGATTGTAAAGCTTTTTATGAAGACTAAATAAT  
GACATAGTTTATCAGGAAAAAGTCCTGGCCAACTCTGTGCCAGCAGCCGCGGTAAGACAG  
AGGGGGCAAGCATTATTCATCTTGACTGGGCGTAAAGGGTGCGTAGGCGGCTATTAAAC  
TATATGGTAAATACTAGTGCAAATTTTAGATGCTATTTTAGTATTAATTAAGCTAAGAGT  
TTAGTTTAGGTTATAAGAATTTTAAATGGAGTAGTAAATGCAAAGATATTAGAAGGAAT  
ACTTATGGGTGAAGATAATTAACATAAATACTGACGCTGAGGCACGAAGGCATAGGTA  
GCAAACAGGATTAGAAACCCCGTAGTCC

>Otu19959

CCAGCCTACGGGTGGTAGCAGTGGGGAATATTGGACAATGGGCGCAAGCCTGATCCAGCC  
ATGCCGCGTGAGTGATGAAGGCCTTAGGGTTGTAAAGCTCTTTCGCTAGGGACGATAATG  
ACGGTACCTAGACAAGAAGCCCCGGCTAACTTCGTGCCAGCAGCCGCGGTAATACGAAGG  
GGGCTAGCGTTGTTTCGGAATTACTGGGCGTAAAGCGCGTG TAGGCGGGCTTTTAAGTCAG  
GGGTGAAATGCCAAGGCTCAACCTTGGAAGTGCCTTTGATACTGGAAGTCTTGAGTCCGG  
GAGAGGTGAGTGGAAGTGCAGTG TAGAGGTGAAATTCGTAGATATCGGAAGGAACACCT  
GTGGCGAAAGCGGCTCACTGGACCATAACTGACGCTGATGCACGAAAGCTAGGGGAGCAA  
ACAGGATTAGAGACCCGCGTAGTCC

>Otu19965

CCAGCCTATGGGGGGCACCAGTGGGGAATCTTGCGCAATGCGCGAAAGCGTGACGCAGCA  
ACGCCGCGTGGGGGAAGACGGCCTTCGGGTGTAAACCCCTTTTCAGTTGGGACGAAGCCC  
AGCCGGTTAATAGCCGGTATGGGTGACGGTACCTTCACAAGAAGCACCGGCTAACTACGT  
GCCAGCAGCCGCGGTAATACGTAGGGTGCAAGCGTTGTCCGGAATTATTGGGCGTAAAGA  
GCGTG TAGGTGGCCTGATCAGTCCGCTGTGAAAGCCCAGGGCTCAACCCTGGAATGCCGG  
TGGATACTGTCAGGCTTGAGTCCGGAAGGGGCGAGTGGAATTCCTGGTGTAGCGGTGAAA  
TGCGCAGATATCAGGAGGAACACCTATGGTGTAGACAGCTTACTGGACCATGACTGACGC  
TGAGGCACGAAAGCGTGGGTAGCAAACAGGATTAGAAACCCCTCGTAGTCC

>Otu20010

CCAGCCTACGGGTGGCACCAGTGGGGAATATTGGACAATGGGGGCAACCCTGATCCGGCC  
ATGCCGCGTGAAGGATGAAGGCCTTAGGGTTGTAAAGTTCTTTTGCCAGGGAAGATGATG  
ACGGTACCTGGAGAATAAGCACCGGCTAACTTCGTGCCAGCAGCCGCGGTAATACGAAGG  
GTGCTAGCGTTGTTTCGGAATTACTGGGCGTGAAGCGCGCGTAGGCTGTTTATCAAGTCAG  
GGGTGAAATCCTGGGGCTTAACCCAGAAATTCCTTTGAAACTGTTAACTAGAGTGTCTG  
GGGGGATAGCGGAATTGCTAATGTAGAGGTGAAATTCGTAGATATTAGCAGGAACACCG  
GTGGCGAAGGCGGCTATCTGGACGACAACCTGACGCTGAGGCGCGAAAGCGTGGGGATCAA  
ACAGGATTAGATACCCAGTAGTCC

>Otu20036

CCAGCCTATGGGAGGCTGCAGTGGGGAATCTTGCGCAATGGACGAAAGTCTGACGCAGCC  
ACGCCGCGTGAGTGAAGAAGGCCTTCGGGTGTAAAGCTCTGTCCGAGGGGACGAAAATG  
CTTGAGGTTGACAGCCTCAGGTACTGACGGTACCCTCAAAGGAAGCACCGGCTAACTCCG  
TGCCAGCAGCCGCGGTAATACGGAGGGTGCAAGCGTTGCTCGGAATTATTGGGCGTAAAG  
GGTAGGTAGGTGGTCTCGTTTGTCTGGGGTGAAAGCCTTGAGCTTAACTCAAGAAGTGCC  
TTAGAAACGGCGAGACTCGAGTACTGGAGAGGGTTCGTGGAATTCCTGGTGTAGCGGTGAA  
ATGCGTAGAGATCGGGAGGAACACCAGAGGCGAAGGCGGCGACCTGGACAGTTACTGACA  
CTCAACTACGAAAGCGTGGGGAGCAAACAGGATTAGATACCCTAGTAGTCC

>Otu20038

CCAGCCTATGGGAGGCAGCAGTGGGGAATATTGGACAATGGGCGCAAGCCTGATCCAGCC  
ATGCCGCGTGGGTGATGAAGGCCCTAGGGTTGTAAAGCCCTTTTCGGCGGGGAAGATAATG  
ACGGTACCCGCAGAAGAAGCCCCGGCTAACTTCGTGCCAGCAGCCGCGGTAATACGAAGG  
GGGCTAGCGTTGCTCGGAATGACTGGGCGTAAAGGGCGCGTAGGCGGCTGTTACAGTCAG  
ACGTGAAATTCTGGGCTCAACCTGGGGGCTGCGTTTGATACGTGATGGCTTGAGTTCGG  
AAGAGGGTCGTGGAATTCACAGTGTAGAGGTGAAATGCGTAGATATTGGGAAGAACACCG  
GTGGCGAAGGCGGCGACCTGGTCCGATACTGACGCTGAGGCGCGAAAGCGTGGGGAGCAA  
ACAGGATTAGATACCCTCGTAGTCC

>Otu20046

CCAGCCTACGGGTTCGAGCAGTGGGGAATATTGGACAATGGGGGCAACCCTGATCCAGTG  
ATGCCGCGTGAGTGAAGAAGGCCCTTCGGGTCGTAAAGCTCTTTAGGTTGGGAAGAAGGCC  
GTTAGAGGACAATGCTAACGGATTGACGGTACCGACAGAATAAGCACCGGCAAACTCTGT  
GCCAGCAGCCGCGTAATACAGAGGGTGCGAGCGTTAATCGGAATTACTGGGCGTAAAGG  
GCGCGTAGGCGGTGGCATGGGTGTGATGTGAAAGCCCCGGGCTTAACCTGGGAAGTGCAT  
CGCAAATCTATGTGACTGGAGTATATGAGAGGGTGGCGGAATTTCCGGTGTAGCGGTGAAA  
TGCGTAGAGATCGGAAGGAACGTTCGATGGCGAAGGCAGCCACCTGGCATAATACTGACGC  
TGAGGCGCGAAAGCGTGGGGAGCGAACAGGATTAGAAACCCGCGTAGTCC

>Otu20049

CCAGCCTATGGGTTCGAGCAGTGGGGAATCTTGGACAATGGGGGCAACCCTGATCCAGCC  
ATGCCGCGTGAGTGAAGAAGGCCCTTCGGGTCGTAAAGCTCTTTAGGTTGGGAAGAAGGTT  
GGTGGAGGAAATGCTGCCAATTTGACGGTACCGACAGAATAAGCACCGGCAAACTCTGTG  
CCAGCAGCCGCGTAATACAGAGGGTGCGAGCGTTGATCGGAGTTACTGGGCGTAAAGGG  
TGCGTAGGCGGCTTGATGTGTGTGATGTGAAAGCCCCGGGCTTAACCTGGGAAGTGCATC  
GCAAATCTGTTGAGCTGGAGTATATGAGAGGGTGGCGGAATTTCCGGTGTAGCGGTGAAAT  
GCGTAGAGATCGGAAGGAACGTCAATGGCGAAGGCAGCCACCTGGCATAATACTGACGCT  
GAGGCACGAAAGCGTGGGGAGCGAACAGGATTAGAAACCCAGTAGTCC

>Otu20062

CCAGCCTACGGGGGGCAGCAGTCGAGAATCTTCGGCAATGGGCGCAAGCCTGACCGAGCG  
ACGCCGCGTGAGAGGACGAAGGCCCTTCGGGTTGTAAACTCCTGTGAGGGGGAGGAAGGGG  
CAACCTTGACCGATCCCTGGAGGAAGCACGGGCTAAGTTCGTGCCAGCAGCCGCGGTAAG  
ACGAACCGTGCGAACGTTATTTCGGAATCACTGGGCTTAAAGCGCGTGATAGGCGGATCGTA  
ACGTTCGGTTGTTGAAATCCCCCGGCTCAACCGGGGAACTGGCACCGATACGAGCGGTCTT  
GAGGGGGGTAGGGGAGTCTGGAATTCGGGTGGAGCGGTGAAATGCGTTGAGATCGGAAG  
GAACGCCCGTGCGGAAAGCGAGGCTCTGGACCGATACTGACGCTGATGCGCGAAAGCGTG  
GGGAGCAAACAGGATTAGAAACCCAGTAGTCC

>Otu20100

CCAGCCTATGGGTGGCAGCAGTAGGGAATCTTGCGCAATGGGCGAAAGCCTGACGCAGCA  
ACGCCGCGTGGGGGATGAAGGCCCTTCGGGTTGTAAACTCCTTTTCAGTGGGAACGAAAATG  
ACGGTACCCACAGAAGAAGCCCCGGCCAACTACGTGCCAGCAGCCGCGGTGATACGTAGG  
GGGCGAGCGTTGTCCGATTCAATTGGGCGTAAAGAGCTCGTAGGCGGTTTGGTTAGTCGG  
GTGTGGAACCTCCAGGCTTAACCTGGAGACGCCACTCGATACTGCCATGACTAGAGTCCG  
GTAGGGGACCACGAATTCCTGGTGTAGCGGTGAAATGCGCAGATATCAGGAGGAACACC  
AGCGGCGAAGGCGGTGGTCTGGGCCAATACTGACGCTGAGGAGCGAAAGCGTGGGGAGCG  
AACAGGATTAGATACCCCGTAGTCC

>Otu20103

CCAGCCTACGGGACGCTGCAGTGGAGAATCTTGGTCAATACGCGAAAGCGTGAACCAGCG  
TCCTGCGGAAATGAAAGATTTTTTAAATCGTGAAGGCTATGATAGTTGTAAAGTTTGTG  
CGCAAATAAAATTTTGCTATTACGTTTGAAGAGAACCCCGGGCCAACAACGTGCCAGCA  
GCTGCGGTAAGACGTTGACGGGGGAGCGTTACTGGCCATCACTAGGCGTAAAGAATGACT  
AGATAGTTTtaggATTTTATAAATAAAATAAAAGGTCAGACGAAATGTTTATAAAACCTT  
AATACTCAAAATAAAAAAGATTAGCGTTAAGTATAGTTCAGAGATAAAATACTAATAGA  
CTATAAGGATCTTCGACGGCCGCGGAGCTTTTCATTTTTATTTTATATCGAATCATTA  
AGCATGAGGATCAATCAGGATTAGAAACCCCTGTAGTCC

>Otu20106

CCAGCCTATGGGTTCGCTCCAGGGTAGAATTGCGGGCTCTTATTCTGGAAGCAGAAGATAA  
ACCAAGTATTTGGCAGGATACAAGGTCTGGGTTTGATGGCGTACATGAAGAGGAAGCTTT  
TTAACGCTCAGTCGATTTACACGCAACAGGCCGATCCTTGGAATCGAGATTCTCTCTCTT

CAATTTCCCTGAACGTTCTTAATTAGGAGGGGCGTGAGGAGATAAACGCTTTCCACTGAA  
GTGGAATAGGGAAGGTAAAGCAAGACCGGGATGTTTCTCGATCTCCCCAAAACGTGACAG  
GCTTATATTGAATAGTTTGGAGATTTTCCAACCTCTTCTCAAACATTTAAGTCAAAATTTG  
AATTTATAAATCGCCTTGTATTTAATGGCGAGCTTATATTAGAGACCCCCGTAGTCC

>Otu20110

CCAGCCTACGGGTTGCTGCAGTCAAGAATCATGGTCAATGCGCGAAAGCGTGAGCCTGCG  
ATCTGTCAATCGTGATGAAGGGTTATCCTGTAAAGCGAGGAGAGAAACCCGAATAAAGAT  
TGGAATCTTGCCAGTCATGATTAAGTCTTGTGCCAGCAGTCGCGGTCATACAAGCATGG  
CGAGCGTCGTTTCGTTGGTATTCGGTGTAGAGGGCTGGTAGGTAGTTGAAGGGGCATCGGA  
TCGGAGCAGGGGGAGGTCCCTCCGGATAGGTCAGATGTGTTGACATGAGACTAGTAGGG  
GTGAGCGGAATGGCAGAGGGACGGATGGAATTGGTCGAGCTCTGTTGGAAGGCCGATAGG  
CGAAGGCGGCTCACTGGGTTAGTCTGGCACTGAGTCAGCGAAAGCGTAGGCAGCAAAGTG  
GATTAGATACCCGTGTAGTCC

>Otu20111

CCAGCCTATGGGAGGCTCCAGCTATTGAGATCAAGTTATTTTCAATACGGTACAGGACCT  
ACAGGTTACTGTTTTAGTTTAGCTACCGGGTAGGCCCATTTGACTTTTTTGTGCGTGTTTACG  
GAGCAGATAAACGTAAAATTATATTTAAATATCTAGATCGTTTTAAATTGCATATGTTAT  
TTGATTAAATGTGTACAATTGTACATGTTTACTATATTGTACTACTAGGTATAGCACTTA  
TTATTTTAGAAAATTAAAAAAATTTGGTGTTCGAAGTTTCAGCTTTATCAAGTAACCGAT  
CCATAGTTTGGTGTTTTAATTTATGAGAGTGTGGGTGAGAGTGGTTCAGTGCTTCCTACA  
TGCTGAACATGTGACTGTGAGTCAACATTTTGTGGCTATTATTAGAGACCCTTGTAGTCC

>Otu20116

CCAGCCTATGGGAGGCAGCAGTGGGGAATATTGGACAATGGGCGAAAGCCTGATCCAGCA  
ATGCCGCGTGAGTGATGAAGGCCTTAGGGTTGTAAAGCTCTTTCGGGTGGGGCGATGATG  
ACGGTACCACCAGAAGAAGCCCCGGCTAACTTCGTGCCAGCAGCCGCGGTAATACGAAGG  
GGGCTAGCGTTGTTTCGGAATTACTGGGCGTAAGGGGTGCGTAGGCGGGTCTTTAAGTCAG  
GGGTGAAATCCTGGAGCTCAACTCCAGAACTGCCTTTGATACTGAGGATCTTGAGTTCGG  
GAGAGGTGAGTGGAAGTGCAGTGTAGAGGTGAAATTCGTAGATATTTCGCAAGAACACCA  
GTGGCGAAGGCGGCTCACTGGCCCGGAACTGACGCTGAGACGCGAAAGCGTGGGGAGCAA  
ACAGGATTAGAGACCCCTGTAGTCC

>Otu20121

CCAGCCTATGGGTGGCACCAGTGGGGAATATTGCACAATGGGCGCAAGCCTGATGCAGCG  
ACGCCGCGTGAGGATGACGGCCTTCGGGTGTAAACTCCTTTCGGCAGGGACGAAGCGA  
AAGTGACGGTACCTGCAGAAGAAGCACCGGCCAACTACGTGCCAGCAGCCGCGGTAATAC  
GTAGGGTGCAGCGTTGTCCGGAATTACTGGGCGTAAAGAGCTTGTAGGCGGTTTGTGCG  
GTCGCTCGTGAAACTAGCAGCTCAACTGTTAGCTTGCGGGCGATACGGGCAGACTAGAG  
TACTTCAGGGGAGACTGGAATTCCTGGTGTAGCGGTGAAATGCGCAGATATCAGGAGGAA  
CACCGGTGGCGAAGGCGGGTCTCTGGGAAGTAAGTACGCTGAGAAGCGAAAGCATGGGT  
AGCAAACAGGATTAGAAACCCCGGTAGTCC

>Otu20145

CCAGCCTATGGGGGGCTGCAGTCGCGAAAACTTTGCAATAAGCGAAAGCTTGACAGGGCT  
ATCCCGAGTGCCATCCGCTGAGGAAGGCTTTTACCCAGTCTAGAACGCTGGGGGAATAAG  
GAGAGGGCAAGTCTGGTGTGAGCCGCCGCGGTAATACCGGCGGCTCGAGTGGTGGCCACT  
ATTACTGGGCTTAAAGCGTCCGTAGCTGGTCTGTTAAGTCTCTGGGGAAATCTTCCGGCT  
CAACCGGAAGGCGTCTCAGGGATACTGGCAGACTAGGGACCGGGAGAGGTGAGAGGTACT  
CCAGGGGTAGGGGTGAAATCCTGTAATCCTTGGGGGACCACCTGTGGCGAAGGCGTCTCA  
CCAGGACGGCTCCGACAGTGAGGAACGAAAGCTGGGGGAGCAAACCGGATTAGAAACCC  
TGTAGTCC

>Otu20192

CCAGCCTACGGGTTGCTGCAGTGGGGAATATTGGACAATGGGGGAAACCCCTGATCCAGCC  
ATGCCGCGTGAAATGATGAAGGCCTTCGGGTGTAAAGTTCTTTTGGTGGGGACGATGATG  
ACGGTACCCACAGAATAAGCTCCGGCTAACTTCGTGCCAGCAGCCGCGGTAATACGAAGG  
GAGCTAGCGTTGTTTCGGAATTACTGGGCGTAAAGAGTGCGTAGGCGGTTTGGCAAGTTCG  
GTGTGAAATCTCCCGGCTTAACTGGGAGGGTGCGCCGAAAACTGCCAGACTAGAGTGTGG  
GATAGGGAAGTGGAATTCCTGGTGTAGCGGTGAAATGCGTAGATATCAGGAGGAACACCT  
GCGGTGTAGACGGCTTCCTGGACCACTACTGACGCTGAGGCACGAAAGCGTGGGGAGCAA  
ACAGGATTAGAGACCCTAGTAGTCC

>Otu20207



CCAGCCTATGGGGTGCACCAGTGAGGAATTTTCGTCAATGGGGGAAACCCTGAACGAGCA  
ACGCCGCGTGAGGAAGAAGGTTTTTCGGATCGTAAACTGCTTTTCTGTGGGACGAGAACG  
GACGGTACCATAGGAATAAGCCCCGGCTAACTACGTGCCAGCAGCCGCGTAATACGTAG  
GGGGCGAGCGTTGTCCGGATTATTGGGCGTAAAGCGCACGCAGGCGGTTCGGCCAAGTTC  
GGAGTGACAGTTTCCGGCTTAAGTGGAAAAGGTCTTCGAAAAGTGGTGGACTTGAGGACT  
TGAGAGGGAGACGGAATTCCGGGTGGAGCGGTGAAATGCGTAGAGATCCGGAGGAACATC  
GAAGGCGCAGGCAGTCTCCTGTCAAGTAACTGACGCTCAGGTGCGAAAGCTAGGGTAGCG  
AACGGGATTAGAAACCCAGTAGTCC

>Otu20210

CCAGCCTACGGGTGCTCCAGTCAAGAACCCTCCACAATGGACGAAAGTCTGATGGAGCG  
ACGTCGCGTGATTGAAGAAGCTCTTCGGAGTGTAATAATCTTTTATGAGGGAAGAAGTTT  
ATTGACGGTACCTCATGTAATAAGGGGCTCCTAATCTCGTGCCAGCAGGAGCGGTAATAC  
GAGAGCCCCAAGCGTTATCCGGAATTATTGGGCGTAAAGGGTGCGTAGGTGGTTGTGTTA  
GTCGTTTGTCAAATCTTCGGGCTCAACCTGAAATCCGCGAACGAAACGGCAGGACTAGAG  
AATGTGAGAGGTGTATAGAACTCATGGTGTAGGGGTGAAATCCGTTGATATCATGAGGAA  
TACCAAAAGCGAAGGCAATACACTGGCGCATATCTGACACTCAAGCACGAAAGCGTGGGT  
AGCGAAAAGGATTAGAAACCCAGTAGTCC

>Otu20212

CCAGCCTATGGGTGCTGTCAGTGGGGAATATTGCACAATGGGCGCAAGCCTGATGCAGCG  
ACGCCGCGTGAGGATGAAGGTCTTCGGATTGTAAACTCCTGTTAAGTGGGAAGAAATGG  
TGAATTTTAATAGAGTTTATAGCTGACAGTACCACCAGAGAAAGCACCGGCAAACTTCGT  
GCCAGCAGCCGCGGTAATACGAAGGGTGCAAGCGTTATTCGGAGTTACTGGGCGTAAAGA  
GCGCGTAGGCGGTTTTTTAAGTTATGTGTTAAATTTCCCGGCTTAACCGGGAACCGGCAT  
ATAAACTGGAAAGCTGGAGTGTAAGAGAGAGAAGTGGAAATCTCGGAGTAGCGGTAAAA  
TGCATAGATCTCGAGAGGAACACCGGAGGCGAAGGCGGCTTCTTAGCTTACAAGTACGCG  
TAAAGCGCGAAAGCTGGGGAGCAAACAGGATTAGAGACCTGGTAGTCC

>Otu20221

CCAGCCTACGGGGTGCAGCAGTGGGGAATCTTCGCAATGGACGAAAGTCTGACGGAGCA  
ACGCCGCGTGAGTGAAGAAGGCCTTCGGGTGCTAAAGCTCTGTTATCAGGGACGAACGAA  
CAGTGTGTAAACAATGCACTGAAGTGACGGTACCTGAGGAGGAAGCCACGGCTAACTACG  
TGCCAGCAGCCGCGGTAATACGTAGGTGGCGAGCGTTGTCCGGAATTATTGGGCGTAAAG  
AGCGTGTAGGTGGGTGCATAAGTCTTTTGTAAAAGTGCGGGGCTTAACCCCGTAATGCGG  
AGGAACTGTGGATCTTGAGTGCAGGAGAGGAAAGCGGAATTTCCAGTGTAGCGGTGAAA  
TGCGTAGATATTGGGAGGAACACCAAGTGGCGAAGGCGGCTTCTTGACTGTGTCTGACAC  
TGAGGCGCGAAAGCTAGGGGAGCAAACAGGATTAGAAACCCAGTAGTCC

>Otu20227

CCAGCCTATGGGGTGTCTCCAGCTAAGAATATTCCGCAATGGACGAAAGTCTGACGGAGCG  
ACGCCGCGTGATGACGAAGGCCGAAAGGTTGTAAAGTCTTTTGTGGGGAAGAATAAC  
CATGGGAGGTAATGCCCGTGGGATGACATGAACCGACGAATAAGCCCCGGCTAACTACGT  
GCCAGTAGCCGCGGTAACACGTAGGGGGCGAGCGTTGTTTCGGAATTACTGGGCGTAAAGG  
GCATGTAGGCGGCTCTGTAAGTCCGGCGTGGAAGCCACGGCTCAACCGTGGGATTGCGC  
TGGAAGTGCAGGAGCTTGAATCATGGAGAGGGAGCTAGAATTCCTGGTGTAGGGGTGAAA  
TCTGTAGATATCTGGAAGAACACCGGTGGCGAAGGCGAGCTTCTATCAGAGGACTGACGC  
TGAGGCGCGAAAGCTAGGGGAGCAAACAGGATTAGAAACCCCTCGTAGTCC

>Otu20280

CCAGCCTACGGGGGGCAGCAGTGGGGAATATTGGACAATGGGCGGAAGCCTGATCCAGCA  
ATGCCGCGTGTTGAAGAAGGCCTTCGGGTGTAAAGCACTTTCAGGGGTGAGGAAGCTG  
TAGTGTTTAATACGCATTACAGTTGACGTTAGCCCCAGAAGAAGCACCGGCTAACTCTGT  
GCCAGCAGCCGCGGTAATACAGAGGGTGCTAGCGTTAATCGGAATTACTGGGCGTAAAGG  
GTGTGTAGGTGGTTGAGTAAGTTAGATGTAAAAACCCGGGCTTAACCTGGGAATGTCTGT  
TTGATACTGCTTAGCTAGAGTACTATAGAGGATAGTGGAAATTTCCGGTGTAGCGGTGAAA  
TGCGTAGATATCGGAAGGAACACCAAGTGGCGAAGGCGACTATCTGGATAGAAACTGACAC  
TGAAACACGAAAGCATGGGTAGCAAACAGGATTAGATACCCGCGTAGTCC

>Otu20284

CCAGCCTACGGGGCGCAGCAGTGGGGAATATTGGACAATGGGCGAAAGCCTGATCCAGCA  
ATGCCGCGTGTTGAAGAAGGTCTTCGGATTGTAAAGCACTTTCGACGGGGACGATGATG  
ACGGTACCAGTAGAAGAAGCCCCGGCTAACTTCGTGCCAGCAGCCGCGGTAATACGAGGG  
GGGCAAGCGTTGTTTCGGAATTATTGGGCGTAAAGCGCGTGTAGGCGGTTTTTTAAGTCTG

ATGTGAAAGCCCTGGGCTCAACCCGGGAAGTGCATTGGAAACTGGGAGACTTGAATACGG  
GAGAGGGTAGTGGAATTCCTGGTGTAGGAGTGAAATCCGTAGATATCAGGAGGAACACCG  
GTGGCGAAGGCGGCTACCTGGACCGATATTGACGCTGAGACGCGAAAGCGTGGGGAGCAA  
ACAGGATTAGAAACCCGGGTAGTCC

>Otu20297

GGACTACTGGGGTTTCTAATCCTGTTTCGCTCCCCACGCTTTCGCTCCTCAGCGTCAGTAT  
CGGCCAGAGACCCGCTTCGCCACCGGTGTTCTCCTGATATCTGCGCATTTTACCGCT  
ACACCAGGAATTCCAGTCTCCCCTACCGAACTCTAGCCTGCCCGTATCGACCGCAGGCTT  
GGGGTTGAGCCCCAAGTTTTTCACGGTCGACGCGACAAGCCGCCTACGAGCTCTTTACGCC  
CAATAAATCCGGACAACGCTCGCACCCCTACGTCTTACCGCGGCTGCTGGCACGTAGTTGG  
CCGGTGCTTCTTCTGCAGGTACCGTCACTCTCGCTTCGTCCCTGCTGAAAGAGGTTTACA  
ACCCGAAGGCCGTATCCCTCACGCGGCGTCGCTGCATCAGGCTTCCGCCCATTGTGCAA  
TATTCCTCCACTGCAGCCCCCGTAGGCTGG

>Otu20302

CAGCCTACGGGGGGCACCAGTGGGGAATATTGGGCAATGGGCGAAAGCCTGACCCAGCCA  
CGCCGCGTGAGTGATGAAGGCCTTCGGGTGCTAAAGCTCTGTGGGGAGGGACGAACAAGC  
ACGGACCTAATACGTCCGGGCCCTGACGGTACCTCCTTAGCAAGCACCGGCTAACCATGC  
GCCAGCAGCCGCGTAATACATGGGGTGCAAACGTTGCTCGGAATCATTGGGCGTAAAGC  
GCACGTAGGCGGCCACTTAAGTCGGATGTGAAATCCCTCGGCTTAAGTGAAGTGCAT  
CCGAAACTGAATGGCTTGAGTACGAAAGAGGGTCGCGGAATTCCTCGGTGTAGAGGTGTAA  
TGCGTAGATATCGGGAGGAACACCTGTGGCGAAAGCGGCGCACTGGACCACTACTGACGC  
TGAGGCGCGAAAGCCGGGGGAGCAAACAGGATTAGAGACCCGTGTAGTCC

>Otu20322

GGACTACAAGGGTTTCTAATCCTGTTTGCTCCCCACGCTTTCGCGCCTCAGTGTGAGTAA  
CGGACCAGGAGACCGCCTTCGCTACTGGTGTCTTCATGATATCTACACATTTTACCGCT  
ACACCATGAATTCCATCTCCCTCTGCCGTACTCAAGACTTCCAGTATCGGAAGCAATTCC  
GCAGTTGAGCTGCGGGATTTCACTACCGACTTAAAAGCCACCTACACGCCCTTTACACC  
CAGTAATTCCGGACAACGCTCGGATCCTACGTATTACCGCGGCTGCTGGCACGTAGTTAG  
CCGATCCTTATTTCGCAAGGTACGGTCAATGCCCTGAAAGGGCACATTCATCCCCTGCAAA  
AGGAGTTTACATCCTAACGGACTTCATCCTCCACGCGGCGTCGCTGCGTCAGCCTTTCGG  
CCATTGCGCAATATTCTCACTGCTGCCCCCGTAGGCTAG

>Otu20328

CCAGCCTATGGGGGGCACCAGTGAGGAATATTGGACAATGGACGCAAGTCTGATCCAGCA  
ATATTGCGTGAGTGATGAAGCCTATTTTGGTGTAAGCTCTTTCATCAGGGATGATAATG  
ACAGTACCTGAAAAAGAAGTCTGGCTAACTCTGTGCCAGCAGCCGCGGTAATACAGAGA  
GGACGAGTATTATTCTAAATGACTGGGTGTAAAGGGTATGTAGGCTGTAAGATAATGATA  
GTTATAAAATCCTAGTATTGCTATATTAGACATTTAACTAACACATATCTACTTGAGTTT  
GATAGAGGATAGTGGTATTTCTAAAGAAGAGATAAAATTCGTTAACCTTAGAAGGAACAC  
CTTTATGCGAAGGCAGCTATCATGATCAATTACTGACGCTGAAATACGAAAGCATGGGGA  
TCAAACGGGATTAGAAACCCTCGTAGTCC

>Otu20330

CCAGCCTATGGGAGGCTGCAGTCGAGAATTTTTCTCAATGGGCGAAAGCCTGAAGGAGCG  
ACGCCGCGTGGGGGATGAATGGCTTCGGCCCGTAAACCCCTGTCATTTGTGAACAAATTG  
CTTACCCAACACGTGAAGCATTGATAGTAACGGAAGAGGAAGGGACGGCTAACTCTGTG  
CCAGCAGCCGCGTAATACAGAGGTCCCAAGCGTTGTTTCGATTCACTGGGCGTAAAGGG  
TGCGTAGGCGGCAGCGTTAGTCGACTGTGAAAGATCCAGGGCTTAACCCAGGAGACGCAA  
TCGAAACGGCGCAGCTACGAGGGCGCGAGAGGTACAGGGAGCTCATGGTGTAGGGGTGAA  
ATCCGTTGATATCATGGGGAACGCCAAATGCGAAGGCACTGTACTGGCGTGTTTTTCGACG  
CTGAAACACGAAAGCGTGGGAATCGAACGGGATTAGAAACCCTGGTAGTCC

>Otu20339

CCAGCCTACGGGTGGCAGCAGTGAGGAATATTGCGCAATGGGCGAAAGCCTGACGCAGCG  
ACGCCGCGTGGAGGATGAAGGTTTTAGGATTGTAAACTCCTGTAAAGTGAGAAGAAATAC  
CTAGTTATAATACAGCTAGGGGATGACGGTATCATTAGAGAAAGCACCGGCTAACTTCGT  
GCCAGCAGCCGCGTAAGACGAGGGGTGCAAGCGTTATTTCGGAATTATTGGGCGTAAAGG  
GTGTGTAGGCGGTATGTTAAGTCAACTGTTAAATTTTCTGGCCTAACCGGAAACATGCAG  
TAGAAACTGGCGTGCTGGAGGATGGAAGAGAGAAGTGGAATTCTCGGAGTAGCGGTAAAA  
TGCGTAGATCTCGAGAGGAACACCAATGGCGAAAGCAGCTTCTTGGTCCATTTCCTGACGC  
TGAAACACGAAAGCGTGGGGAGCAAACAGGATTAGAGACCCCTGTAGTCC

>Otu20341

CCAGCCTACGGGTGGCTGCAGTTGGGAATCTTGGACAATGGGGGAAACCCTGATCCAGCC  
ATGCCGCGTGAGTGATGAAGGCCTTCGGGTGTGTAACCTCTTTCGACGGGGAAGATGATG  
ACGGTACCTGGAGAATAAGCACCGGCTAACTTCGTGCCAGCAGCCGCGGTAATACGAAGG  
GTGCTAGCGTTGTTTCGGAATTACTGGGCGTAAAGCGCGCGTAGGCGGCTTCTCAAGTCAG  
GGGTGAAATCCTTGGGCTCAACCAAGAATTGCCTCTGAAACTGTGAGGCTTGAGTGTCTG  
GAGGGGATAGCGGAATTGCTAATGTAGAGGTGAAATTCGTAGATATTAGCAGGAACACCG  
GTGGCGAAGGCGGCTATCTGGACGACAACCTGACGCTGAGGCGCGAAAGCGTGGGGATCAA  
ACAGGATTAGAGACCCGCGTAGTCC

>Otu20363

CCAGCCTACGGGTGCTGCAGTGGGGAACCTTGC GCAATGGGCGAAAGCCTGACGCAGCG  
ACGCCGCGTGGGGGAAGAAGGCTTTCGGGTGTGTAACCCCTTTCAGGAGGGACGAAGCTA  
CTCGGGTTAATAGCCAGAGGGTGACGGTACTTCCAGAAGAAGCCCCGGCTAACTACGTG  
CCAACAGCCGCGGTAATACGTAGGGGGCAAGCGTTGTCCGGATTTATTGGGCGTAAAGAG  
CGTGTAGGCGGCCATTTAGGTCCGTTGTGAAAACCTCGAGGCTCAACCTCGAGACGCCGGC  
GGAAACCGAGTGGCTAGAGTCCGGAAGAGGAGAGTAGAATTCCTGGTGTAGCGGTGAAAT  
GCGCAGATATCAGGAGGAATACCCGTGGCTAAGGCGGCTCTCTAGTACGGTACTGACGCT  
GAGACGCGAAAGCGTGGGGAGCGAACAGGATTAGAGACCCTAGTAGTCC

>Otu20366

CCAGCCTATGGGTGCTGCAGAGGGGAATTTTGGACAATTAACGCAAGTTAGATCCAGTG  
ATTTTATGGGATTGAGGTATGAACTATGGTAGTTTTTAAATTTTTGTGCGCAGAGTACAATA  
ATGATGCTAGCTCTGTTAAGAAGCACTGACTAACTATGTGCCAGCAGTCGCGGGAAGACA  
TAATGTGCAAGCGTTATTCATGATGATTAGGCGTAAAATACAAGTAGACGGCTAAATGAA  
ATTTTAAATTTAAAAGGTTATGTTTGGGTAAATCAAAGGTAAATGGTACTTTTAATGGA  
GTGGTAAAATGCACATATATTACGAGGACCTCCAATGGCCACGGCAATTTACTAGATTAT  
ACTGAAGTTGAGTTGTGAAAGTGTGGGTATCAAATGGGATTAGAAACCCTCGTAGTCC

>Otu20373

CCAGCCTACGGGGTGCAGTTAGGGAATTTTGTCAATGGGCGAAAGCCTGAACGAGTG  
ACGCCGCGTGCGGGATGACGCCTTTCGGGGTGTAAACCGCTTTTCCCAGGGACGAGGATG  
GACGGTACTTTGGGGAATAAGTCTCGGCTAACTACGTGCCAGCAGCCGCGGTAATACGTAG  
GAGGCGAGCGTTGTCCGGAATTACTGGGCGTAAAGCGCGCGTAGGCGGTCTTTTGCCTAG  
GCGGTGAAAGCCCCAGGCTCACCTTGGGGAGGTCCGTCTAAACGGGGAGACTTGAGGGCG  
GTAGGGGCCGGTGGAACGCCCGGAGTAGCGGTGAAATGCGTTGAGATCGGGCAGAACACC  
AGTGGCGAAGGCGGCCGGCTGGGCCGTTCTTGACGCTGAGGCGCGTAAGCCAGGGGAGCG  
AACGGAATTAGAAACCCCGTAGTCC

>Otu20383

CAGCCTACGGGTGCACCAAGTGGGGAATTTTGC GCAATGGGGGAAACCCTGACGCAGCAA  
CGCCGCGTGAGGATGAAATATCTCGGTATGTAACTCCTTTCGATAGGGAAGATAATGA  
CGGTACCTATAGAAGAAGCCCCGGCTAACTTCGTGCCAGCAGCCGCGGTAATACGAGGGG  
GGCAAGCGTTGTTTCGGAATTATTGGGCGTAAAGGGCGCGTAGGCGGCGAAGCAAGTTAGG  
CGTGAAAGCCCCGGGCTCAACCTGGGAATTGCGCTTGATACTGCTTTGCTTGAGTTCGGG  
AGAGGTGAGTGGAATTCCCAGTG TAGAGGTGAAATTCGTAGATATTGGGAAGAACACCGG  
TGGCGAAGGCGGCTCACTGGACCGATACTGACGCTGAGGCGCGAAAGCGTGGGGAGCAAA  
CAGGATTAGAAACCCCTGTAGTCC

>Otu20394

CCAGCCTATGGGTGCGCAGCAGTCGAGAATCTTCGGCAATGGGCGCAAGCCTGACCGAGCG  
ACGCCGCGTGAGGATGAAGGCCTTCGGGTGTGTAACCTCCTGTCGAGGGGAGGAAGGGA  
AACTTGACCGATCCCTGGAGGAAGCACGGGCTAAGTTCGTGCCAGCAGCCGCGGTAAGAC  
GAACCGTGCTAACGTTATTCGGAATCACTGGGCTTAAAGCGCGTG TAGGCGGATGGGAAC  
GTCGTTTGCTGAAAGCCCCGGCTCAACCGGGGAACCTGGCGCCGAAACGCCCCGTCTCGA  
GGGACGTAGGGGGACCTGGAACCTCCGGTGGAGCGGTGAAATGCGTTGAGATCGGAAGGA  
ACGCCCGTGGCGAAAGCGAGGTCCTGGACGTTTACTGACGCTGAGACGCGAAAGCGTGGG  
GAGCAAACAGGATTAGATACCCGTGTAGTCC

>Otu20398

CCAGCCTACGGGTGCGCAGCAGTGGGGAATTTTGC GCAATGGGGGAAACCCTGACGCAGCA  
ACGCCGCGTGAGGATGAAATCCCTTGGGATGTAACTCCTTTCGATCGGGACGATTATG  
ACGGTACCGGAAGAAGAAGCCCCGGCTAACTTCGTGCCAGCAGCCGCGGTAATACGAAGG  
GGGCTAGCGTTGCTCGGAATGACTGGGCGTAAAGGGCGCGTAGGCGGCTTGTATAGTCAG

ATGTGAAATTCCTGGGCTCAACCTGGGGACTGCATTTGATACGTGCAGGCTTGAGTGTGG  
AAGAGGGTCGTGGAATTCACAGTGTAGAGGTGAAATTCGTAGATATTGGGAAGAACACCG  
GTGGCGAAGGCGGCGACCTGGTCCATAACTGACGCTGAGGCGCGAAAGCGTGGGGAGCAA  
ACAGGATTAGAGACCCTTGTAAGTCC

>Otu20403

CCAGCCTACGGGGTGCTCCAGTGGGGAATATTGGACAATGGGCGAAAGCCTGATCCAGCC  
ATGCCGCGTGAGTGAAGAAGGCCTTCGGGTGTAAAGCTCTTTCGGCGGGGACGATGATG  
ACGGTACCCGCATAAGAAGCCCCGGCAAACCTTCGTGCCAGCAGCCGCGGTAATACGAGGG  
GGGCAAGCGTTGTTTCGGAATTATTGGGCGTAAAGGGTGCGTAGGCGGTTTGATAAGTCTG  
ATGTGAAATCTATGGGCTCAACCCATAGTCTGCATTAGAACTGTTCGGGCTTGAGTATGG  
GAGAGGTGAGTGGAATTTCCGGTGTAGCGGTGAAATGCGTAGATATCGGAAGGAACACCT  
GTGGCGAAAGCGGCTCACTGGACCATAACTGACGCTGAGGCACGAAAGCTAGGGGAGCAA  
ACAGGATTAGATACCCAGTAGTCC

>Otu20404

CCAGCCTACGGGGGGCTGCAGTGTGGAATATTGGACAATGGACTATAAAGGTCTGATCCA  
GTTACATTGCTCAAGTGATCTGACGACGTTTCGTCTGTAAGCTGTATGGTTTATGGTTTTT  
AATCTTGATTATGCAAAGAAGCCATAAATAAATAGTTCTGGGCAACTCCGTGCCAGCA  
GCCGCGGAATACGGAGAGAGCAAGCGTTAATAATCCTAACTGGGTGTAAAGGGTATGTA  
GGTGGGTATAAATTGGTAAGACTAAATGTTAATTACTGCGAAATAGGTAGAAAATTTTA  
GTACCATATACCTTGAGATAAACTGAGGTTGTTAGAATACGTTAGCGAACTTTAGTAAAT  
TTTAGATTTAACGGGGACTGCTTAGCGCGAAGGCATATAACTAAGTTTATTCTGACACTA  
AGGTACGAAAGCTTAGGGATCAAAAAGGATTAGAAACCCCTCGTAGTCC

>Otu20407

CCAGCCTACGGGAGGCTGCAGTGGGGAATATTGTGCAATGGGGGAAACCTGACGCAGCA  
ACGCCGCGTGAGTGGTGAAGGCTTCGGATCGTAAAGCTCTGTCCGCAGGAACGATGGAA  
CAGTTGGCCAATATCCAACGGTTTTGACGGTACCTGCAAAGGAAGCACCGGCTAATTCTG  
TGCCAGCAGCCGCGGTAATACAGAGGGTGCAAGCGTTGTTTCGGAATCATTTGGGCGTAAAG  
GGCGCGTAGGCGGCTCAATAAGTCCGATGTGAAAGCCCAGGGCTCAACCTTGGAAGTGCA  
TCCGAAACTGCTGAGCTTGAATCTCGGAGAGGGTGGTAGAATTCCCAGTGTAGAGGTGAA  
ATTCGTAGATATTGGGAGGAATACCGGTGGCGAAGGCGACCGCCTGGACGAAGATTGACG  
CTGAGGCGCGAGAGCGTGGGGAGCAAACAGGATTAGAAACCCGCGTAGTCC

>Otu20479

CCAGCCTATGGGACGCTCCAGGGAATTGTAATGATGCCGGTAGCTCCGGGTTTTATGACG  
CGGTACATCTCATCAATGAGCTTCTGATAGCCCTCGACATGCTCCAGCACCTCCGTACAT  
ATCAGTCCATTAAATTTATCATCTGGAAAAGGGATATCCTGCCCCGTTGAAATAAGTGACA  
TCAGGATTGTTGTAATCAAACCTTGCTGCGTCCGAAATATCTACACCATAATACTTGGTT  
GTATTCTTATCCAGCAAAAACCTGTATGGTGAAGTGTCCGCGAGCCGACATCGAGCACCTCG  
CCATTGAACTTTGGCAGTATCTGCCTGAGGTCACGTAGCGCGGTGAGTGTCTGAAAGTCA  
AGCAGCAATCTGCCGTAAAACCTGATCTTGCCAAACGCGCCGTCCTCAGGGCCGATATTA  
GAAACCCTAGTAGTCC

>Otu20489

CCAGCCTACGGGTTGCTCCAGTGGGGAATATTGGACAATGGGCGCAAGCCTGATCCAGCC  
ATGCCGCGTGAAATGATGAAGGCCTTAGGGTTGTAAAGTTCTTTTGTGAGGGACGATAATG  
ACGGTACCGGAAGAAGAAGCCCCGGCTAACTTCGTGCCAGCAGCCGCGGTAATACGAGGG  
GGGCAAGCGTTGTTTCGGAATTATTGGGCGTAAAGGGTGCGTAGGCGGTTTGGAAGTCTT  
GTGTGAAATCTCCGGGCTCAACTCGGAGTCTGCACGGGAACTGCCGGGCTTGAGTGTGG  
GAGAGGTGAGTGGAATTTCCGGTGTAGCGGTGAAATGCGTAGATATCGGAAGGAACACCT  
GTGGCGAAAGCGGCTTACTGGACCACAACCTGACGCTGATGCACGAAAGCTAGGGGAGCAA  
ACAGGATTAGAAACCCCGTAGTCC

>Otu20493

CCAGCCTACGGGTTGCTGCAGTGGGGAATTTTGCGCAATGGGGGAAACCTGACGCAGCA  
ACGCCGCGTGAGAGGATGAAGTATCTTGGTACGTAAACTCCTTTTCGATGGGGAAGATAATG  
ACGGTACCCATAGAAGAAGCCCCGGCTAACTTCGTGCCAGCAGCCGCGGTAATACGAGGG  
GGGCAAGCGTTGTTTCGGAATTATTGGGCGTAAAGGGTGCGTAGGCGGTTTGACAAGTCAT  
CTGTGAAATCTATGGGCTCAACCCATAGTCTGCAGGCGAAACTGTTCGGGCTTGAGTATTG  
GAGAGGTGAGTGGAATTTCCGGTGTAGCGGTGAAAGTGCCTAGATATCGGGAGGAACACCT  
GTGGCGAAAGCGGCTCACTGGACCATTACTGACGCTGGAACCTCGAAAGCTAGGGGAGCAA  
ACAGGATTAGAAACCCCTTGTAAGTCC

>Otu20505

CAGCCTACGGGAGGCACCAGTAAGGAATATTGGTCAATGGGCGGAAGCCTGAAGGAGCGA  
CGCCGCGTGGGGGATGAATGGCTTCGGCCCCGTAAACCCCTGTCATTTGCGAACAAATTAT  
TTTACCTAACACGTGAAGTATTGATTGTAGTAGAAGAGGAAGGGACGGCTAACTCTGTGC  
CAGCAGCCGCGGTAATACAGAGGTCCCAAGCGTTGTTTCGGATTCACTGGGCGTAAAGGGT  
GCGTAGGCGGTTCGGGTGAGTCTGATGTGAAATCTCCAAGCCTAACTTGAAACTGCATTA  
GATACTATCCGGCTCGAGGAATGGAGGGGGGACTGGAATACTTGGTGTAGCAGTGAAATG  
CGTAGATATCAAGTGGAACACCAGTGGCGAAGGCGAGTCTCTAGACATTTCTGACGCTG  
AGGCACGAAAGCCAGGGGAGCAAACGGGATTAGAAACCCCGTAGTCC

>Otu20508

CCAGCCTATGGGTCGCTCCAGTGGGGAATATTGGACAATGGGGGAAACCCTGATCCAGCA  
ATGCCGCGTGTGTGAAGAAGGCCTTCGGGTGTAAAGCACTTTTGTGAGGAACGAAACGG  
ACTGAGTTAATACCTTGGTCTAATGACGGTACCTGAAGAATAAGCACCGGCTAACTACGT  
GCCAGCAGCCGCGGTAATACGTAAGGTGCAAGCGTTAATCGGAATTACTGGGCGTAAAGC  
GTGCGCAGGCGGTTATGTAAGACAGATGTGAAATCCCCGGGCTCAACCTGGGAACTGCAT  
TTGTGACTGTAGAGCTGGAGTACGGCAGAGGGGGATGGAATTCGCGGTGTAGCAGTGAAA  
TGCGTAGATATGCGGAGGAACACCGATGGCGAAGGCAATCCCCTGGGCCTGTACTGACGC  
TCATGCACGAAAGCGTGGGGAGCAAACAGGATTAGAAACCCCGTAGTCC

>Otu20510

CCAGCCTATGGGTGGCTCCAGAAAGGCAGGTCTGGTCAGGACGGGTTCCTCCACCACCGC  
AGCAACGTCGACCCGCGGCAACGCTGGCGTTTCGAGGATCTCGGCGGCCATCGGCTCTCC  
CTGACGATAAAAGTCATGGACGCCCATGTCCCGAAGGTACTCCACGTAAGCCCGCAGCTG  
CTGCTCTGCTTCTCCCGCCATGGCTCTATGGTATCGCTACTTAGTGCACTGGAAGATCGA  
GCACCGGCTCCACGATCTTCTCCGGCAGAACAACTTCACGTGCCCTGCTTGATCTCAT  
CCTGCGCCACGCGGCAAGCCTTCATAGACTTGGCAACGATCAGTGGAGCAGCACCCGACT  
GCAACTGTCTCGCCCGGCGTGCCGCACCCCTTACCAGGCTGTATTTGTTGTGGAATGCGC  
TTTCATTTCGTCATTAGAGACCCCTCGTAGTCC

>Otu20517

CCAGCCTACGGGACGCTCCAGTCGAGAATTTTTCTCAATGGGCGAAAGCCTGAAGGAGCG  
ACGCCGCGTGGGGGATGAATGGCTTCGGCCCGTAAACCCCTGTCATTTGCGAACAAATTA  
TTTTACCTAACACGTAAAGTATTGATTGTAGCGGAAGAGGAAGGGACGGCTAACTCTGTG  
CCAGCAGCCGCGGTAATACAGAGGTCCCAAGCGTTGTTTCGACTCACTGGGCGTAAAGGG  
TGCGTAGGCGGTAGGGTAAGTCTGTTGTGAAATCTCCGAGCTTAACCTCGGAACTGCAAT  
GGAACTATCCGACTAGAGGAATGGAGGGGAGACTGGAATACTTGGTGTAGCAGTGAAAT  
GCGTAGATATCAAGTGGAACACCAGTGGTGTAGACAGCTTACTGGACCATGACTGACGCT  
GAGACACGAAAGCGTGGGTAGCAAACAGGATTAGAGACCCCTGTAGTCC

>Otu20535

GGACTACGCGGGTTTCTAATCCTTTTTTGCTCCCCACGCTTTCGCGTCTCAGTGTGAGGAA  
GGTCCCAGTGCAATGCCTTCGCCTTTGGTATTCGCGACGATATCAACGGATTTACCCCT  
ACACCGTGCGTTCCATGCACCTCTAACCTCCTCGAGCTCCGCCGTATCTCCTGCACTTCC  
AGGGTTAGGCCCTGGGCTTTAACAGAAGACGCGCGAAGCCACCTACACGCGCTTTACGCC  
CAATAAATCCGGATAACGCTTGAGGTCTACGTATTACCGCTGGTGCTGGCACGTAGTTAC  
CCACCTCTTTCCGTAAGACACTCATTTACATTGTTATCTTACTACCGCAGTTTACGACCC  
GAAGGCCTTCATCCTGCACGCGGTGTCGCTCGATCAGGCTTTCGCCCATTGTCGAATATT  
CTCGACTGCTGCCCCCATAGGCTGG

>Otu20555

CCAGCCTATGGGATGCTGCAGCCGAGAATATTTCGACAATGGGCGAAAGCCTGATCGAGCG  
ACGCCGCGTGATGGATGAAGTGCTTCGGTACGTAAACATCTTTTATCGGGGACGAAATTA  
TTGACGGTACCCGATGAATAAGGGGCTCCTAACTCTGTGCCAGCAGGAGCGGTAATACAG  
AGGCCCCAAGCATTACCCGGAATCACTGGGCGTAAAGGGTGTCTAGGCGGCCATGTTAGT  
CGTTTGTAATAATCCGTGGGCTCAACCTACGGCGCGCAAGCGAAACGGCATGGCTCGAGAG  
CGTGAGAGGTGCATGGAACCTCATGGTGGAGGGGTGAAATCCGTTGATATCATGGGGAAACA  
CCAAAGGCGAAGGCAGTGCACCTGGCACGTTTCTGACGCTCAAACACGAAAGCCAGGGGAG  
CGAACGGGATTAGAAACCCCTGTAGTCC

>Otu20558

CCAGCCTACGGGGGGGCTGCAGTCGAGAATTTTTCTCAATGGGCGAAAGCCTGAAGGAGCG  
ACGCCGCGTGGAGGATGAAGGTCTTCGGATTGTAAACTCCTGTCATTAGAGAACAAAACC  
CACTTAGTAACCTGATGTTGGGTTTGATAGTATCTGAAGAGGAAGAGACGGCTAACTCTGT

GCCAGCAGCCGCGGTAATACAGAGGTCTCAAGCGTTGTTTCGGATTTCATTGGGCATAAAAGG  
GTGCGCAGGCTGCGAGGTGTGTCGGATGTGAAATCCCGGGGCTTAACCCCGGAACTGCAT  
TCGATACTGCCTTGCTTGAGGACTGGAGAGGAGACTGGAATTCCTGGTGTAGCAGTGAAA  
TGCGTAGATATCGGAAGGAACACCTGTGGCGAAAGCGGCTCACTGGACCATAACTGACGC  
TGATGCACGAAAGCTAGGGGAGCAAACAGGATTAGATAACCTCGTAGTCC

>Otu20581

CCAGCCTACGGGTGGCAGCAGTAGGGAATATTGGTTAATGGGCGAAAGCCTGACCCAGCA  
ACGCCGCGTGTGCGATGAAGGCCTTCGGGTGTAAAGCACTTTTGGAGGGGATGAGGAAG  
GACAGTACCCTTCGAATAAGCCTCGGCTAACTACGTGCCAGCAGCCGCGGTAACACGTAG  
GAGGCGAGCGTTATCCGGATTTACTGGGCGTAAAGCGTGTGCAGGCGGTTTGGTTAGTTG  
GATGTGAAAGCCCCTGGCTTAACCGGGAGAGGTCGTTCAATACTTCCAGACTAGAGGATG  
TGAGAGGAGAGCGGAATTCCGAGTGTAGTGGTGAAATGCGTAGATATTCGGAGGAACACC  
AGTGGCGAAAGCGGCTCTCTGGCACATTTCTGACGCTCATATGCGAAAGCTAGGGTAGCA  
AACGGGATTAGATAACCCGCGTAGTCC

>Otu20603

GGACTACGAGGGTCTCTAATCCCGTTTGCTCCCCTAGCTTTCGTGCATCAGCGTCAGTAA  
TGGTCCAGTGAGCCGCTTTCGCCACAGGTGTTCCCTCCCGATATCTACGCATTTACCCGCT  
ACACCGGGAATTCCACTCACCTCTCCCATACTCCAGCACGGCAGTTTCCCCTGCAGGCTC  
CGAGTTAAGCCCGGAGATTTACAGAAGGCTTACCGCACCGCCTACGCACCCTTTACGCC  
CAATAATTCCGAACAACGCTTGCACCCTCTGTATTACCGCGGCTGCTGGCACAGAGTTAG  
CCGGTGCTTCTTCATCCGGTACCGTCATCATCGTCCCGATCGAAAGGAGTTTACACCCCA  
AGGGGCTTCATCCTCCACGCGGCGTTGCTGCGTCAGGGTTTCCCCCATTGCGCAAAATTC  
CCCACTGCAGCGACCCGTAGGCTGG

>Otu20614

CCAGCCTATGGGAGGCTCCAGTGGGGAATATTGGACAATGGGCGAAAGCCTGATCCAGCG  
ACGCCGCGTGAGTGATGAAGGCCTTCGGGTGTAAAGCTCTGTTGAGGGAGAAGAAAACCT  
GCTAGGGCGAATAGGCCTAGCACTTGACGGTATCCCTTTAGAAAGCACCGGCTAACTCTG  
TGCCAGCAGCCGCGGTAAGACAGAGGGTGCAAACGTTGCTCGGAATTACTGGGCGTAAAG  
CGCGTGTAGGCGGACCTGTAAGTTGGACGTGAAAGCCCTGGGCTCAACCCAGGAATTGCA  
TCCAAAGCTACAGGCCTAGAGTGATGGAGAGGGTAGCAGAATTCCTGGTGTAGAGGTGAA  
ATTCGTAGATATCAGGAGGAACACCGGTGGCGAAGGCGGTTACCTGGACATCAACTGACG  
CTGAGACGCGAAAGCGTGGGGAGCAAACAGGATTAGAAACCCCGTAGTCC

>Otu20615

CCAGCCTACGGGGGGCACCACTGGGGAATTTTGGACAATGGGCGCAAGCCTGATCCAGCC  
ATGCCGCGTGCGGGAAGAAGGCCTTCGGGTGTAAACCGCTTTTGTGAGGGAAGAAACGC  
TCTGGGCTAATACCCTGGGGTAATGACGGTACCTGAAGAATAAGCACCGGCTAACTACGT  
GCCAGCAGCCGCGGTAATACGTAGGGTGCAAGTGTTAATCGGAATTACTGGGCGTAAAGC  
GTGCGCAGGCGGTCTTGCAAGACAGATGTGAAATCCCGGGCTTAACCTGGGAACTGCAT  
TTGTGACTGCAAGGCTGGAGTACGGTAGAGGGGGATGGAATTCGCGTGTAGCAGTGAAA  
TGCGTAGATATGCGGAGGAACACCGATGGCGAAGGCAGTCCCCTGGACCTGTACTGACGC  
TCATGCACGAAAGCGTGGGGAGCAAACAGGATTAGATAACCTTG TAGTCC

>Otu20647

GCCAGCCTATGGGACGCAGCAGTAACGAATCTTCCGCAATGCCCCGAAGGTTGACGGAGC  
GACGCCGCGTGTGGGACGAAGCCCTTCGGGTGTAAACCACTGTCAGGGGTTAGAAAGTT  
CTGATCAACCCCGAGAGGAAGGCACGGCTAACTCTGTGCCAGCAGCCGCGGTAAGACAGAG  
GTGCCAAGCGTTAGGCGGAATCACTGGGCTTAAAGCGTGTGTAGGCGGGCGTCTAAGTAC  
CTTGTGAAATCCCCGGCTCAACCGGGGAACTGCTCGGTATACTGGGCGCCTTGAGCCAC  
CTAGGGGTGCGCGGAACAAATGGTGGAGCGGTGAAATGCGTAGATATCATTTGGAACGCC  
AAGGGTGAAAACAGGCGACTGGGGGTGTGCTGACGCTGAGACACGAAAGCCAGGGGAGCG  
AACGGGATTAGAAACCCGTGTAGTCC

>Otu20672

CCAGCCTACGGGACGCTGCAGTCGAGGATCTTCGTCAATGGGCGCAAGCCTGAACGAGCG  
ACGCCGCGTGCGGATGAAGGCCTTCGGGTGTAAAGCGCGAAAGTGGAGAGAAAGGGCA  
ACTTGATCAATCCACAGTAAGGACGGGCTAAGTTTCGTGCCAGCAGCCGCGGTAAGACGAA  
CTGTCCTAACGTTGTTTCGGAATCACTGGGCTTAAAGGGCGCGTAGGCGGTCCAACAAGTC  
GGGGGTGAAATCCTGCAGCTCAACTGCAGAAAGTGCCTTCGATACTGAGGATCTTGAGTTC  
GGGAGAGGTGAGTGGAAGTGCAGTGTAGAGGTGAAATTCGTAGATATTCGCAAGAACAC  
CAGTGGCGAAGGCGGCTCACTGGCCCCGATACTGACGCTGAGGCACGAAAGCGTGGGGATC

AAACAGGATTAGAGACCCCAGTAGTCC

>Otu20685

CCAGCCTACGGGGTGCAGCAGTTGGGAATATTGCGCAATGGGCGAAAGCCTGACGAAGCG  
ACGCCGTGTGAGCGATGAAGGCCTTCGGGTGTAAAGCTCTTTCGCCTGGGAACAAGAGA  
TAGTTATGAATAATAGCTAAATTTGAGGGTACCAGGTAAAGAAGCACCGGCTAACTCCGT  
GCCAGCAGCTGCGGTAATACGGAGGGTGCAAGCATTAAATCGGATTTATTGGGCGTAAAGG  
GCGCGTAGGCGGATTGGTAAGTTGGATGTGAAATTCCGAGGCTCAACCTCGGAGCTGCAT  
TCAAACTACTATTCTAGAGGGATGGCGGAGAAAACGGAATTCCACGTGTAGCGGTGAAA  
TGCGTAGATATGTGGAGGAACACCTGTGGCGAAAGCGGTTTTCTAGCTTATACCTGACGC  
TGAGGCGCGAGAGCAAGGGGAGCAAACAGGATTAGAGACCCCAGTAGTCC

>Otu20689

CCAGCCTACGGGGTGTCTGCAGTGGGGAATTTTTCGCGCAATGGGGGAAACCCTGACGCAGCA  
ACGCCGCGTGGAGGATGAAGTACTTCGGTACGTAAACTCCTTTCGATCGGGACGATAATG  
ACGGTAGCTTGAGAAGAAGCCCCGGCTAACTCTGTGCCAGCAGCCGCGGTAATACAGAGG  
GTGCGAGCGTTAATCGGAATTACTGGGCGTAAAGCGCGCGTAGACGGTTTTGTAAAGTCAG  
ATGTGAAATCCCTGGGCTCAACCTGGGAAC TGATTTGAGACTGCATGGCTAGAGTATCG  
AAGAGGGAAGTGGAATTTCCGGTGTAGCGGTGAAATGCGTAGATATCGGAAGGAACACCA  
GTGGCGAAAGCGACTTCCTGGTCAATACTGACGTTTCATGTGCGAAAGCGTGGGGAGCAA  
ACAGGATTAGAAACCCCGGTAGTCC

>Otu20695

CCAGCCTATGGGTGGCTGCAGTTAGGAATCTTTCGCGCAATGGGCGAAAGCCTGACGCAGCC  
ATGCCGCGTGAATGATGAAGGTCTTCGGATCGTAAAGCACTGTCGCGAGGGAAAAAGAAA  
GTGATGGTACCTCGAGAGGAAGCACCGGCTAACTCTGTGCCAGCAGCCGCGGTAATACAG  
AGGGTGCAGCGTTGTTTCGGAATTATTGGGCGTAAAGCGCTGGTAGGTGGCCTGTTAAGT  
CGCGTGTGAAAGCTTCCGGCTCAACCGGAAAAAGTGCGCGGATACTGGCAGGCTTGAGTG  
CCGGAGAGGGTTCGTGGAATTCCTGGTGTAGAGGTGAAATTCGTAGATATCGGGAGGAACA  
CCAGAGGCGAAGGCGACGACCTGGAAGGTAACTGACACTGAGCAGCGAAAGCGTGGGTAG  
CAAACAGGATTAGATACCCTTGTAGTCC

>Otu20714

CCAGCCTATGGGTTCGCTGCAGTCGAGAATTTTTCTCAATGGGGGAAACCCTGAAGGAGCG  
ACGCCGCGTGGAGGATGAAGGTCTTCGGATTGTAAACTCCTGTTCATGAGGGAACAAACC  
GCACGTTTAACTGATGTGCGGCTGATAGTACCCCAAGAGGAAGAGACGGCTAACTCTGTG  
CCAGCAGCCGCGGTAATACGAAGGGGGCTAGCGTTGTTTCGGAATTACTGGGCGTAAAGG  
CGCGTAGGCGGCGTTACAAGTTAGGCGTGAAAGCCCCGGGCTCAACCTGGGAATTGCGCT  
TGATACTGTAGTGCTAGAGTTCGGGAGAGGTGAGTGGAATTCCTAGTGTAGAGGTGAAAT  
TCGTAGATATTGGGAAGAACACCGGTGGCGAAGGCGGCTCACTGGACCGATACTGACGCT  
GAGGCGCGAAAGCGTGGGGAGCAAACAGGATTAGAGACCCTAGTAGTCC

>Otu20716

CCAGCCTATGGGTTCGCTGCAGTGGGGAATCTTTCGCGCAATGGGGGAAACCCTGACGCAGCA  
ACGCCGCGTGAAGTGAAGGCCTTCGGGTGTAAGCTCTTTCGGAAGGGACGAAACCG  
CTCCGAGCTAATATCTCGGAGCATTGACGGTACCTTAAGAAGAAGCACCGGCTAACTCTG  
TGCCAGCAGCCGCGGTAATACAGAGGGTGCAAGCGTTGTTTCGGAATTATTGGGCGTAAAG  
CGCGTGTAGGCGGCAAGGCATGTGCGGTGTGAAAGCCCTCGGCTTAACCGAGGAAGTGCG  
CCCGAACTACTTTGCTTGAGTACCGGAGAGGATGGCGGAATTCCTGGTGTAGAGGTGAA  
ATTTCGTAGATATCGGGAGGAACACCGAGTGCGGAAGGCGGCCATCTGGACGGTTACTGACG  
CTGAGACGCGAAAGCGTGGGGAGCAAACAGGATTAGAAACCCTCGTAGTCC

>Otu20742

CCAGCCTATGGGAGGCTGCAGTTGGGAATCTTGGACAATGGGGGAAACCCTGATCCAGCC  
ATGCCGCGTGAAGTGAAGGCCTTCGGGTGTAAACTCTTTCGACGGGGACGATAATG  
ACGGTACCCGTAGAAGAAGCTCCGGCTAACTTCGTGCCAACAGCCGCGGTAATACGTAGG  
GTGCAAGCGTTAATCGGAATTACTGGGCGTAAAGGGTGCGTAGGCGGGTCTTTAAGTCAG  
GGGTGAAATCCTGGAGCTCAACTCCAGAACTGCCTTTGATACTGAGGATCTTGAGTTCGG  
GAGAGGTGAGTGGAAGTGCAGTGTAGAGGTGAAATTCGTAGATATTCGCAAGAACACCA  
GTGGCGAAGGTGGCTCACTGGCCCGATACTGACGCTGAGGCACGAAAGCGTGGGGAGCAA  
ACAGGATTAGATACCCAGTAGTCC

>Otu20757

CCAGCCTACGGGTGGCAGCAGTTAGGAATCGTACACAATGGACGAAAGTCTGATGTTCGTG  
ACGCCGCGTGGAGGAAGAAGGCTCTCGGGTTGTAAACTCCTTTTTTGTGGGAAATTATG

ATGGTACCATAAGAATAAGCATCGGCTAACTACGTGCCAGAAGCCTCGGTAATACGTAGG  
ATGCGAGCGTTATCCGGATTTATTGGGCGTAAAGAGCGCGTAGGCGGTCTTTTAAAGTCTG  
ACCTTAAAGCCTGGGGCCTAACCCAGAGATGGGTTGGATACTGATTGACTTGTGCATTG  
CAGGGGCGAGTGGAATCTACGGTGTAGGGGTAAAATCCATTGATATCGTAGAGAACACCA  
GTGGCGAAGGCGACTCGCTAGGCAATTGCAGACGCTGAGGCGCGAAAGCGTGGGTAGCGA  
ACGGGATTAGAAACCCTAGTAGTCC

>Otu20781

CCAGCCTACGGGAGGCACCAGCAGGGAATCGTACGCAATGGACGAAAGTCTGACGTCGCA  
ATGCCGCGTGAGGATGAAGGCCTTCGGGTCGTAAACTCCTTTTATAGTAATAGAGATGT  
TATTAAGAATAAGCACCTGCTAACTCTGTGCCAGCAGCCGCGGTAATACAGAGGGTGCAA  
GCGTTATCCGGATTTATTGGGCGTAAAGCGTTTCGTAGGCGGCGGGGAAAGTTACTTTTC  
AAAGACCACGGCTTAACCGGGGGAAGGGAGGTAATACTATTCCGCTTGAATTATGGTGGG  
GTTTCTAGAACTGATGGTGTAGTAGTGCAATACGTTGATATCATCAGGAATTCCAAGGGC  
GAAGGCAGGAACTAACCATTATTGACGCCGAGGAACGACAGCTAGGGGAGCGAAAGGG  
ATTAGAAACCCCGTAGTCC

>Otu20799

CCGCCTACGGGAGGCTGCAGTGAAGAATCTTGGGCAATGGACGAAAGTCTGACCCAGTGA  
GAATACATGCATGACGAATGCGCATAGTTTTCTGTAAAGTGCTATTCGCGGATTGAAGAA  
ACTGACTAAACCGAGATGAAGCGCCGGCCAACCTCCGTGCCAGCAGCCGCGGCAAGACGGA  
GGGCGCGAGCGTTATTCTGTTTTGATTGGGTGTAAAGGGTATGTAGGCGGCCCTCGTTTT  
CTGACCTAAAGAGCGGAGTGTTCCCTACGCGACGGTCTTTTACAAAGGGGGCTTGTGTGT  
TGATAGGTAGGGTCAAATTCTCAAGTAGGGGTAATATCCAACGATATGAGAATGAACGTC  
AGCTGGCGAAGGCGCCTTTCCCGCTTCAACAGACGCTAAGGTACGAAAGCTTAGGTAGCA  
AACAGAATTAGAAACCCTTGTAGTCC

>Otu20800

CCAGCCTATGGGTGGCACCAGTAGGGAATATTGCGCAATGGGCGAAAGCCTGACGCAGCA  
ACTCCACGTGTGGGATGAAGCATTTCCGGTGTGTAAACCACTGTCGGCAGGGAACAAAAGC  
CCCGTAAGGGTGATTGAGGGTACCTGCAGAGGAAGCACCGGCAAACCTTCGTGCCAGCAGC  
CGCGGTAACACGAGGGGTGCGAGCGTTGTTCCGAATCACTGGGCGTAAAGGGCGCGTAGG  
CGGGCTGGTAAGTCGAGGGTTTAATCACGGGGCCTAACCCCGTGGCCGCCTTCGATACTG  
CCAGTCTTGGGTAGGCCAGGGGCTTGGGGAACATCTGGTCTAGCGGTGGAATGCGTAGAT  
ATCAGATGGAACACCAGTGCGGAAGGCGCCAAGCTGGGACCATAACCGACGCTGAGGCGCG  
AAAGTGCGGGGAGCGAACAGGATTAGAAACCCGGGTAGTCC

>Otu20804

CCAGCCTATGGGGGGCTGCAGTGGGGAATATTGGACAATGGGGGCAACCCTGATCCAGCA  
ATGCCGCGTGAGTGATGAAGGCCTTAGGGTTGTAAAGCTCTTTCGGTGGGGACGATGATG  
ACGGTACCCACAGAAGAAGCCCCGGCTAACTTCGTGCCAGCAGCCGCGGTAATACGAAGG  
GGGCTAGCGTTGTTCCGAATTACTGGGCGTAAAGCGCACGCAGGCGGCTCGTTAAATTAG  
GAGTGAAAGCCCTGGGCTCAACCTGGGAATTGCTCTTAAGACTGGCGAGCTTGAATTCGG  
AAGAGGGCAGTGGAAGTCCAAGTGTAGAGGTGAAATTCGTAGATATTTGGAAGAACACCA  
GTGGCGAAGGCGGCTACCTGGACCGATATTGACGCTGAGACGCGAAAGCGTGGGGAGCAA  
ACAGGATTAGATACCCGAGTAGTCC

>Otu20811

CCAGCCTACGGGTTGCACCAGGCGAGAACTTCCGCAATGCGCGAAAGCGTGACGGGGGT  
AGTCCGAGTGCTAGCCTAACGGCTAGCTTTTCATTAGCCTTAATCACTAGTGGAATAAGG  
GTCTGGGCAAATCCTGTGCCAGCCGCCGCGGTAATACAGGTGGCACGAGTGGTGTCCGCG  
AATATTGAGCTTAAAGCGCCCGTAGCCGGCTTTGCAAGTTTCCCGTCAAATCTCTCTACT  
TAACAGAGAGGCGTGCGGGAAATACTACGAGGCTCGAGAGTGGGGGAAGCCAAGAGTACG  
TTAGGGGGAGCGGTAAAATGCTTTAATCCTTAACGGACTACCAAGTGGCGAAAGCGCTTGG  
CTGAAACACGTCTGACGGTGAAGGACGAAGGCTAGGGGAGCAAACGGGATTAGAAACCTT  
AGTAGTCC

>Otu20819

CCAGCCTATGGGACGCTCCAGTCGAGGATTTTTCTCAATGGGGGAAACCCTGAAGGAGCG  
ACGCCGCGTGGGGGATGAAGGTCTTCGGATTGTAAACCCCTGTCATGCGGGATCAAAGCT  
TACGACCCAACACGTCGTAAGTTGATAGTACTGCAAGAGGAAGCAGTGGCTAACTCTGTG  
CCAGCAGCCGCGGTAATACAGAGACTGCAAGCGTTGTTCCGATTTCATTGGGCGTAAAGGG  
TCCGCAGGTGGTCCGGTAAGTCAGATGTGAAATCCCATGGCCTAACCATGAAAAGTCGTT  
TGAAACTACCGGGCTAGAGGACTGGAGAGGAGACTGGAATGGTCCGTGTAGCGGTGAAAT



GCGTAGAGATCGACCAGAACACCAGTAGCGAAGGCGAGTCTCTGGACAGTTCCTGACACT  
CATGGACGAAAGCTAGGGGAGCAAACGGGATTAGATACCCGAGTAGTCC

>Otu20827

CCAGCCTACGGGTGGCACCAGTAGGGAATATTGGGCAATGGGCGAAAGCCTGACCCAGCC  
ATGCCGCGTGCAGGATTGAATGTTCTATGAATTGTAACTGCTTTTGTCCGGGACGAAAA  
AGCCCTTTTCTAGGGGAAGTACGGGTACCGGACGAATAAGGACCGGCTAACTCCGTGCCA  
GCAGCCGCGGTAAATACGGAGGGTCCAAGCGTTATCCGGATTCACTGGGTTTAAAGGGTGC  
GTAGGTGGTCAGATAAGTCAGTGGTGAAATCCTACAGCTTAACTGTAGAACTGCCATTGA  
AACTGTTTGGCTTGAGTATCGTTGAGGCGAGTGGAATGTAACTGTAGCGGTGAAATGCA  
TAGATATGTTACAGAACACCAATTGTGAAGACAGCTCGCTGGACGATCACTGACACTGAG  
GCACGAAAGCGTGGGTAGCGAACAGGATTAGAGACCCCTGTAGTCC

>Otu20851

CCAGCCTACGGGTCGCTGCAGTCGAGAATCTTCGTCAATGGGCGAAAGCCTGAACGAGCG  
ACGCCGCGTGCGGGATGAGGGCCTTCGGGTTGTAAACCGCTGTCAGTGGGGAGGAAGGCC  
CTGTGCAGAGCAGGGTTTGACCTATCCGCAGAGGAAGTACGGGCTAAGTTCGTGCCAGCA  
GCCGCGGTAACACGAACCGTACAAACGTTATTCGGAATTACTGGGCTTAAAGGGTGCCTA  
GGCGGCCCGGAAAGTTGGATGTGAAATCCCTCGGCTTAACCGAGGAATTGCGTTCAAAC  
TACCGGGCTCGAGGAAGACAGAGGTGAGTGGAAGTTAGGGTGGAGCGGTGAAATGCGTTG  
ATATCCTAAGGAACACCAGTGGCGAAAGCGACTCACTGGGTCTTTTCTGACGCTGAGGCA  
CGAAAGCCAGGGGAGCGAACGGGATTAGAAACCCCTCGTAGTCC

>Otu20864

CCAGCCTACGGGGGGCACCAGTGGGGAATATTGCACAATGGGGGAAACCCCTGATGCAGCA  
ACGCCGCGTGAAGGAAGAAGGCCCTTCGGGTTGTAACTTCTTTGATAGGGGACGATAATG  
ACGGTACCCTAAGAACAAGCCACGGCTAACTACGTGCCAGCAGCCGCGGTAATACGTAGG  
TGGCAAGCGTTGTCCGGAATTACTGGGTGTAAAGGGCGTGTAGACGGGATTATTAGTCAG  
ATGTGAAATTTCCAGGCTTAACTTGGAGACTGCATCTGAACTGTAATTCTTGAGTATCG  
GAGAGGAAAGCGGAATTCCTAGTGTAGCGGTGAAATGCGTAGATATTAGGAGGAACACCA  
GTGGCGAAGGCGGCTTTCTGGACGATTACTGACGCTGAAACACGAAAGCGTGGGTAGCAA  
ACAGGATTAGAAACCCAGTAGTCC

>Otu20868

CCAGCCTACGGGGGGCTCCAGTGGGGAATATTGCGCAATGGGCGAAAGCCTGACGCAGCA  
ACGCCGCGTGAGTGATGAAGGTCTTCGGATCGTAAAGCTCTGTCCGCAGGAACGATGGGC  
TCGTTGGCCAATATCCAACGGGCTTGACGGTACTTGCAAAGGAAGCACCGGCTAACTCTG  
TGCCAGCAGCCGCGGTAAGACAGAGGGTGCAAGCGTTGTTCCGGAATTACTGGGCGTAAAG  
CGCGCGTAGGCGGCTTGTTAAGTCGGATGTGAAATCCCGCAGCTTAACTGTGGAAGTGCA  
TTCGATACTGGCGAGCTTGAGTCCTGGAGAGGGTGGTGGAATTCCCAGTGTAGAGGTGAA  
ATTCGTAGATATTGGAGGAACACCGGTGGCGAAGGCGACCACCTGGACAGAGACTGACGC  
TGAGGTGCGAAAGCGTGGGTAGCAAACAGGATTAGATACCCGCGTAGTCC

>Otu20897

CCAGCCTATGGGGTGCTCCAGCAGGGAATCTTGCGCAATGGGGGAAACCCCTGACGCAGCA  
ATGCCGCGTGAGTGATGAAGGTCTTAGGGTCGTAAAGCTCTTTTACCAGGGATGATAATG  
ACAGTACCTGGAGAATAAGCTCCGGCTAACTCCGTGCCAGCAGCCGCGGTAATACGGAGG  
GAGCTAGCGTTGTTCCGGAATTACTGGGCGTAAAGCGCACGTAGGCGGTTACTCAAGTCAG  
AGGTGAAAGCCCCGGGGCTCAACCCCGGAACAGCCTTTGAACTAGGTGACTAGAATCTTG  
GAGAGGCGAGTGGAATTCGAGTGTAGAGGTGAAATTCGTAGATATTCCGAAGAACACCA  
GTGGCGAAGGCGGCTCGCTGGACAAGTATTGACGCTGAGGTGCGAAAGCGTGGGGAGCAA  
ACAGGATTAGAAACCCGAGTAGTCC

>Otu20899

CCAGCCTACGGGAGGCACCAGTAGGGAATATTGCTCAATGGACGAAAGTCTGACGCAGCA  
ACGCCGCGTGAGTGATGAAGGTCTTCGGATTGTAAACTCTGTTGAGTGGGAAGAAAAGT  
TCCGTTTTTAAACAAAACGGGGCCTGACGGTACTGCTCGAGGAAGCACCGGCTAACTACG  
TGCCAGCAGCCGCGGTAATACGTAGGGTGCGAGCGTTGTTCCGGAATCACTGGGCGTAAAG  
GGAGCGTAGGCGGGACCGTAAGTTAGGAGTTAATACCCAGGCTTAACCTGGGACCTGCT  
TCTAATACTGCGGTTCTTGAGTAAGGAAGAGGGAGATGGAATTCCAGGTGTAGCGGTGGA  
ATGCGTAGATATCTGGAAGAACACCAGCAGCGAAGGCGGTCTCCTGGTCTTACTGACG  
CTGAGGCTCGAAAGTTAGGGGAGCAAACAGGATTAGAAACCCCGTAGTCC

>Otu20900

CCAGCCTACGGGGGGCTGCAGTAAGGAATATTGGTCAATGGGGGCAACCCCTGAACCAGCC

ATGCCGCGTGCAGGATGACGGCCTTCTGGGTTGTAACTTCTTTTATGGGGGAAGAAAAAT  
TATGGTTTCTACTATAACCGACAGTACCCTAGGAATAAGCACCGGCTAACTCCGTGCCAG  
CAGCCGCGGTAATACGGAGGGTGCGAGCGTTATCCGGATTTACTGGGTTTAAAGGGTGTG  
TAGGCGGGCTATTAAGTCAGCGGTGAAATCTCCGGGCTCAACCCGAAACTGCCATTGAT  
ACTATTAGTCTTGAATTCTGTGTGAGGAGGGCGGAATATGTCATGTAGCGGTGAAATGCAT  
AGATATGACATAGAACACCGATAGCGAAGGCAGCTCTCAAAGCAGACATTGACGCTGAGG  
CACGAAAGCGTGGGGATCAAACAGGATTAGATACCCTCGTAGTCC

>Otu20910

CCAGCCTACGGGGGGCTGCAGTCGAGAATCTTCGGCAATGGGGGAAACCCTGACCGAGCG  
ACGCCGCGTGCGGGATGAAGGCCCTTCGGGTTGTAAACCGCTGTCAGTGGGGAGGAAATGC  
CGTAGGGTAATCTCTATGGTTTGACCTATCCGCAGAGGAAGGACGGGCTAAGTTCGTGCC  
AGCAGCCGCGGTAAGACGAACCGTCCAAACGTTATTTCGGAATCACTGGGCTTAAAGGGTG  
CGTAGGCGGTCTGACAAGTTGGGTGTGAAATACCTCGGCCTAACCGAGGAACTGCGCCCA  
AAACTGTTCGGACTCGAGGAAGACAGAGGTGTGCGGAACTTAGGGTGGAGCGGTGAAATGC  
GTTGATATCCTAAGGAACACCAGTAGCGAAAGCGGCACACTGGGTCTTATCTGACGCTGA  
TGCACGAAAGCGTGGGGAGCGAACAGGATTAGAGACCCTCGTAGTCC

>Otu20912

CCAGCCTATGGGTGGCAGCAGTCGAGAGGCTTCGGCAATGGGGGAAACCCTGACCGAGCG  
ACGCCGCGTGGGCGATGAAGGCCGTTAGGTTGTAAAGCCCTGTCGTGCGGGAAGAAACGC  
AGGTGGGTTAATAATCCATCTGTCTGACGGTACCGCGAAAGGAAGCTCCGGCCAACTCCG  
TGCCAGCAGCCGCGGTAATACGGGGGGAGCGAACGTTGTTTCGGAATTACTGGGCGTAAAG  
GGCGTGCAGGCGGCCTTGTAAGCGGAATGTGAAATGCCCTGGCTCAACCAGGGAACCTGCA  
TCCAGACTGCAAGGCTTGAGTATAGGAGAGGATGGGAGAATTCCCGGTGTAGCGGTGAA  
ATGCATTGATATCGGGAGGAACACCAGTGGCGAAGGCGCCCATCTGGCCTAATACTGACG  
CTGAGGTGCGAAAGCGTAGGGAGCAAACAGGATTAGAAACCCTAGTAGTCC

>Otu20918

CCAGCCTACGGGTGCGCAGCAGCAACGAATATTCCGCAATGCGCGAAAGCGTGACGGAGCG  
ACGCCGCGTGTGGGACGAAGCCCTTCGGGGTGTAACCCCTGTCGGGGTTAAGCAAGCGA  
AAGGATCAAATAGGTCTCGTAGATGAGCTATCCCAAAGGAAGCCACGGCTAACTCTGTGC  
CAGCAGCCGCGGTAAGACAGAGGTGGCAAGCGTTGCTCGGAATCACTGGGCTTAAAGGGT  
GTGTAGGCGGTTCCGTAAGCATTTTTGTGAAAGCCCCAGGCTCAACCTGGGAACTGCAGAA  
TGTACTGCCGGGCTTGAGGCAAGTAGAGGTCACTGGAACCTCTGGGTGGAGCGGTGAAATG  
CGTAGATATCCAGGGGAACGCCCATGGCGAAGGCAGGTGACTGGGCTTGTTCTGACGCTG  
AGGCACGAAAGCGTGGGTAGCAAACGGGATTAGATACCCTAGTAGTCC

>Otu20922

CCAGCCTATGGGATGCTGCAGTCGAGAATTTTTCTCAATGGGCGAAAGCCTGAAGGAGCG  
ACGCCGCGTGGGGGATGAATGGCTTCGGCCCGTAACCCCTGTCATTTGCGAACAAATTG  
GTTACCTAACACGTGAACCATTGATTGTAGCGGAAGAGGAAGGGACGGCTAACTCTGTG  
CCAGCAGCCGCGGTAATACAGAGGTCCCAAGCGTTGTTTCGGATTCACTGGGCGTAAAGGG  
TGCGTAGGCGGTTTGATAAGTCTGATGTGAAATCCCGCAGCTTAACTGCGGAACTGCATT  
GGAAACTATCTGACTAGAGGAATGGAGGGGAGACTGGAATACTTGGTGTAGCAGTGAAAT  
GCGTAGATATCGAGAGGAACACCAGTGGCGAAGGCGAGTCCCTGGACAACCTCCTGACACT  
AAGGCACGAAAGCTAGGGGAGCAAACAGGATTAGATACCCTAGTAGTCC

>Otu20940

CCAGCCTATGGGGGGCACCAGCTGGGAATCTTCTGCAATACACGCAAGTGTGACAGAGCG  
AACCAGAGTGTTCCCTCATTGAGGAACTTTTGCCAAATCTAAAAAGTTTGCGGAATAAGGA  
CTGGGCAAGACTAGTGCCAGCCGCCGCGGTAATACTAGCTGTCCGAGTCGCAACCATCTT  
TATTGGGTCTAAACATCCGTAGCTTGTTTAGCAAGTTCCTTGTGAAATTCGACATCTTA  
AGTGTGTAGCGCGCAAGGAGTACTACTAGGCTAGAGACTGGAAGACGTAAGAAGTACGTT  
TGAAGTAGCGGTTAAATGCGTTAATCTTAGACGGACTCACAACAGCGAAGGCATCTTACG  
AGGACAGTTCTGACAGTAAGGGATGAAGGCCAGGGGCGCAAAACGGATTAGAAACCCAG  
TAGTCC

>Otu20963

CAGCCTATGGGTGGCAGCAGTAAGGAATATTGGTCAATGGACGAAAGTCTGAACCAGCCA  
TGCCGCGTGAAAGGATGAAGGCCCTATGGGTTGTAACTTCTTTTATACGGGAAAAAACCC  
CCCGACGTGTGCGGGGCTGATGGTACCGTACGAATAAGCATCGGCTAACTCCGTGCCAGC  
AGCCGCGGTAATACGGAGGATGCAAGCGTTATCCGGATTCAATTGGGTTTAAAGGGTGCCT  
AGGCGGAATGATAAGTCAGTGGTGAATCCTACAGCTCAACTGTAGAACTGCCATTGATA

CTGTCAATCTTGAGTACATTTGGAGTGGGCGGAATGTGTCATGTAGTGGTGAAATGCTTA  
GATATGACACAGAACTCCGATCGCGAAGGCAGCTCACTAACTGTAAGTACGCTGAGGC  
ACGAAAGCGTGGGGATCAAACAGGATTAGATACCCTTGTAGTCC

>Otu20973

CCAGCCTATGGGGTGCTGCAGTGGGGAATATTGGACAATGGGCGCAAGCCTGATCCAGCC  
ATGCCGCGTGAGTGAAGAAGGCCTTAGGGTTGTAAAGCTCTTTTGGCGGGGACGATAATG  
ACGGTACCCGCAGAATAAGCCCCGGCTAACTTCGTGCCAGCAGCCGCGGTAATACGAAGG  
GTGCGAGCGTTAATCGGAATTACTGGGCGTAAAGCGCGCGTAGGCGGTTGGTCAAGTCAG  
TTGTGAAAGCCCCGGGCTCAACCTGGGAATGGCAATTGAGACTGACCGACTGGAGTGTA  
CAGAGGACCGTGGAATTCCCGGTGTAGCGGTGAAATGCGTAGAGATCGGGAAGAACACCG  
ATGGCGAAGGCAGCGGTCTGGGTTAACACTGACGCTGAGGTGCGAAAGCGTGGGGAGCAA  
ACAGGATTAGATACCTTCGTAGTCC

>Otu20975

CCAGCCTATGGGGTGCTGCAGTGGGGAATTTTCCACAATGGGCGAAAGCCTGATGGAGCA  
ACGCCGCGTGTTGATGAAGGTCTTCGGATCGTAAAGCACTTTTCGACCGGGACGAAAACC  
TGCAACCTAACACGTTGCAGACTGACGGTACCGGGAGAAGAAGCACCGGCTAACTCTGTG  
CCAGCAGCCGCGGTAATACAGAGGGTGCAAGCGTTGTTTCGGAATTATTGGGCGTAAAGCG  
CGTGTAGGCGGCTTGTCAAGTCGGGTGTGAAAGCCCTCAGCTCAACTGAGGAAGTGCGCC  
CGAAACTAGCGAGCTTGAGTACCGGAGAGGATGGCGGAATTCGCAAGTAGAGGTGAAAT  
TCGTAGATATGCGGAGGAACACCGGTGGCGAAGGCGGCCATCTGGACGCTAACTGACGCT  
GAGACGCGAAAGCGTGGGGAGCAAACAGGATTAGATACCCGAGTAGTCC

>Otu20977

CCAGCCTATGGGTGGCAGCAGGCGCGAAAACTCTACAATGCGGGAAACCGTGATAGGGGA  
ACTCTGAGTGCCCGTTAAATCGGGCTGTCCATCAGTTTAAATAACTGGTGAAGAAAGGGC  
CGGGCAAGACCGGTGCCAGCCGCCGCGGTAATACCGGCGGCTCGAGTGGTGGCCACTATT  
ACTGGGCTTAAAGCGTTTCGTAGCTGGTTTGTAAAGTCTCTGGGGAAATCCCGCAGCTTAA  
CTGTGGGACTTGCTGGAGATACTATCAGACTTGAGGTGCGGAGAGGTTAGGGGTACTCCC  
AGGGTAGGGGTGAAATCCTATAATCCTGGGAGGACCACCTGTGGCGAAGGCGCCTAACTG  
GAACGAACCTGACGGTGAGTAACGAAAGCCAGGGGCGCGAACCAGGATTAGATACCCGAGT  
AGTCC

>Otu20990

CCAGCCTATGGGTGCGACCCAGTGAGGAATATTGGTCAATGGACGCAAGTCTGAACCAGCC  
ATGCCGCGTGACAGGATGACGGCCTTACAGGTTGTAAACTGCTTTTATACGGGACGAAACC  
CCTGAACGTGTTGCGGGGCTGACGGTACTGTATGAATAAGCATCGGCTAACTTCGTGCCAG  
CAGCCGCGGTAATACGAAGGATGCAAGCGTTATCCGGATTTATTGGGTTTAAAGGGTGCG  
TAGGCGGACTTATAAGTCAGTGGTGAAATCTCGTCGCTTAACGACGAACGTGCCATTGAT  
ACTGTAGGTCTTGAGTACAGATGCCGTTGGCGGAACGTGTCATGTAGCGGTGAAATGCAT  
AGATATGACACAGAACACCGATTGCGAAGGCAGCTGACGAAACTGTAAGTACGCTGAGG  
CACGAAAGCGTGGGGATCAAACAGGATTAGATACCCTAGTAGTCC

>Otu20992

CCAGCCTACGGGGTGCTGCAGTGGGGAATTTTGGACAATGGGGGCAACCCTGATCCAGCC  
ATGCCGCGTGTTGGGAAGAAGGCCTTCGGGTGTAAACCACTTTTGTACAGGAAGAAAGCG  
AATCCATTAATACTGGGTTTGGATGACGGTACCTGGAGAATAAGCACCGGCTAACTACGT  
GCCAGCAGCCGCGGTAATACGTAGGGTGCAAGCGTTAATCGGAATTACTGGGCGTAAAGC  
GTGCGCAGGCGGTTTCGCAAGTCAGATGTGAAAGCCCCGGGCTCAACCTGGGAATTGCAT  
TTGAAACTACGAGGCTAGAGTGTGTGAGAGGGGGTAGAATTCACGTGTAGCAGTGAAA  
TGCGTAGAGATGTGGAGGAGTACCGATTGGCGAAGGCAGCCCCCTGGGATGACACTGACGC  
TCATGCACGAAAGCGTGGGGAGCAAACAGGATTAGAAACCCCGGTAGTCC

>Otu20993

CCAGCCTATGGGTTGCTCCAGTGGGGAATTTTACGCAATGGGCGAAAGCCTGACGTAGCG  
ACACCGCGTGAACGAAGAAGCCCTTTGGGGTGTAAGTTCTGTGCGCAGGGACGAATAAA  
TGACGGTACCTGCAAAGGAAGCATCGGCTAACTACGTGCCAGCAGCCGCGGTAAGACGTA  
GGATGCAAGCGTTGTCCGGATTCAATTGGGCGTAAAGAGTTCGTAGGCGGTTTGTAAAGTC  
TGATGTTAAAGATCAGGGCTCAACCCTGGGATTGCTTCGGATACTGGCAGACTGGAGTAT  
GGTAGAGGTAAAGTGAATTTCTGGTGTAGCGGTGAAATGCGTAGATATCAGGAAGAACAC  
CGGTGGCGTAGGCGACTTACTGGGCCATAACTGACGCTGAGGAACGAAAGCCAGGGGAGC  
GAATGGGATTAGATACCCTCGTAGTCC

>Otu21019

CCAGCCTATGGGAGGCAGCAGTCGAGAATTTTTCTCAATGGGCGAAAGCCTGAAGGAGCG  
ACGCCGCGTGGGGGATGAATGGCTTCGGCCCGTAAACCCCTGTCATTTGTGAACAAATTA  
ATCTACCCAACACGTGGATTATTGATTGTACCGAAAGAGGAAGAGACGGCTAACTCTGTG  
CCAGCAGCCGCGGTAATACAGAGGTCTCAAGCGTTGTTTCGATTTCATTGGGCGTAAAGGG  
CGCGTAGGCGGCGGGGTAAGTCGGATGTGAAATCTCGGGGCTTAACCCCGAAACTGCATT  
CGATACTGCCTTGCTTGAGGACTGGAGAGGAGACTGGAATTCCTGGTGTAGCAGTGAAAT  
GCGTAGATATCAGGAGGAACGCCAATGGCGAAGGCAAGTCTCTGGACAGTTCCTGACGCT  
CATGCACGAAGGCCAGGGGAGCAAACGGGATTAGATACCCCAGTAGTCC

>Otu21027

CAGCCTACGGGGTGTGTCAGTAACGAATATTGGGCAATGGGCGAAAGCCTGACCCAGCGA  
TGCCGCGTGTAGGATGAAGTTCTTCGGAATGTAACTATTGTCAGGGGCTAGAAAGCTAC  
GGCTGATCAGCCCCAGAGGAAGTCACGACTAACTTCGTGCCAGCAGTCGCGGCAATACGA  
AGGTGACAAGCGTTATTCGATATCACTGGGCTTAAAGGGTGCCTAGGCGGAAACGTAAAGT  
GTCTTGTGAAATCCCCCGGCTTAACCGGGGAATCGCTCGGCATACTGCGTTTCTTGAGGC  
AAGCAGGGGTGTGTGAACTCTTGGTGGAGCGGTGGAATGCGTAGATATCAAGAGGAACG  
CTGAAGGTGAAGACAGCACACTGGGCTTGCCCTGACGCTGAGGCACGAAAGCGTGGAGAG  
CAAACAGGATTAGATACCCCCGTAGTCC

>Otu21044

CCAGCCTATGGGGGCGAGCAGCTAAGAATCTTCCGCAATGGGGGAAACCCCTGACGGAGCG  
ACGCCGCGTGGATGATGAAGGCCGTAAGGTTGTAAAATCCTTTTGTGGCGAAGAATAGA  
GGTGGGAGTGGAAGCCCATCTGATGACGTTAGCCGATGAATAAGCCCCGGCCAATTACG  
TGCCAGCAGCCGCGGTAATACGTATGGGGCGAGCGTTGTTTCGGAGTTATTGGGCGTAAAG  
AGCGTGTAGGCGGCTCATCAAGTCTGGTGTGAAAGCGCAGGGCTTAACCCCTGCGTATGCG  
CTGGAAACTGGTGGGCTTGAGTTCCTGAGGGGAAGCTGGAATTCAGGTGTAGGGGTGAA  
ATCTGTAGATATCTGGAAGAACACCGGTGGCGAAGGCGAGCTTCTATCAGAGGACTGACG  
CTGAGGCGCGAAAGCGTGGGGAGCAAACAGGATTAGATACCCCCGTAGTCA

>Otu21045

CCAGCCTATGGGATGCTCCAGGCGCGAAAACTTTACAATGCCGGCAACGGCGATAAGGGG  
ACCTCGAGTGCCAGGATACAATCCTGGCTGTCGTAATGCCCTAAAAAGCATTGCATAGCAA  
GGGCCGGGCAAGACCGGTGCCAGCCGCCGCGGTAACACCGGCGGCTCGAGTGGTAACCGC  
TATTATTGGGTCTAAAGGGTCTGTAGCCGGCTGAATAAGTCTCTTGGGAAATCTGACAGC  
TCAACTGTCAGGCTTTCAGGGGATACTGTTTCGGCTCGAGACCGGGAGAGGTGAGAGGTAC  
TCCAGGGGTAGGAGTGAAATCCTGTAATCCTTGGGGGACCACCTGTGGCGAAGGCGTCTC  
ACCAGAACGGCTCCGACAGTGAGGGACGAAAGCTGGGGGAGCAAACCGGATTAGAAACCC  
GAGTAGTCC

>Otu21050

TCCTACGGGGGCGAGCAGTGAGGAATATTGCGCAATGGCCGAAAGGCTGACGCAGCGACG  
CCGCGTGGAGGATGAAGTCCATTAGGATGTAACTCCTTTTGCAGGGGATGAATAGTCCC  
TTTCAGGGATTTGACCGTACCCTGCGAATAAGGATCGGCTAACTACGTGCCAGCAGCCGC  
GGTAATACGTAGGATCCGAGCGTTGTCCGGAATTACTGGGTGTAAAGGGCGTGTAGGTGG  
GCTTCTAAGTCGGTGGTGAAATCCTGCGGCTTAAGTGCAGAATTGCTTCCGATACTGGGA  
GTCTTGAGTACGGCAGAGGGAGATGGAATTCATGGTGTAGCGGTGAAATGTGTAGATATC  
ATGAAGAACACCGGTAGCGAAGGCGGTCTCCTGGTCCGTTACTGACACTGAGGCGCGAAA  
GCGTGGGGAGCAAACAGGATTAGATACCCCTGTAGTCA

>Otu21071

CCAGCCTATGGGTCGCTGCAGTGAGGAATCTTGTACAATGGGCGAAAGCCTGATACAGCG  
ACGCCGCGTGGAGGATGAAGGCCTTAGGGTTGTAACTCCTGTCAAGCGGGAAGAAAGTC  
TTGTCTCTAATACAGACGAGATATGACGGTACCGCTAAAGGAAGCACCGGCTAACTTCGT  
GCCAGCAGCCGCGGTAATACGAAGGGTGCAAGCGTTATTCGGATTTACTGGGCGTAAAGG  
GTGTGTAGGTGGTGTGATAAGTCTATCGTTAAAGCTCCCGGCCTAACCGGGAATGCGG  
TGGAACCTATTGCGCTAGAGGGTGAGAGAGAGAAGTGAATTCCTCGGAGTAGCGGTAAAA  
TGCGTAGATATCGAGAGGAACACCGATGGCGAAGGCAGCTTCTTGGCTCATTCCTGACAC  
TGAAACACGAAAGCGTGGGGAGCAAACAGGATTAGATACCCCTCGTAGTCC

>Otu21110

CCAGCCTACGGGGTGCACCAGTAAGGAATATTGGTCAATGGACGGAAGTCTGAACCAGCC  
ATGCCGCGTGCAGGATGACTGCCTTATGGGTTGTAACTGCTTTTATGCCGGAATAAACCC  
CCTTTACGAGTTAGAGGGTTGATTGTACGGTAAGAATAAGGATCGGCTAACTCCGTGCCA  
GCAGCCGCGGTAATACGGAGGATCCAAGCGTTATCAGGATTTATTGGGTTTAAAGGGTGC

GTAGGCGGGTGCAAAAGTCAGTGGTGAAATCCTTCGGCTTAACTGAAGAACAGCCATTGA  
TACTGTGTGCCTTGAGTACAAATGAAGTGGGCGGAATGTGTAGTGTAGCGGTGAAATGCT  
TAGATATTACACAGAACACCGATAGCGAAGGCAGCTCACTAAGCTGTAAGTACGCTGAG  
GCACGAAAGCGTGGGGATCAAACAGGATTAGAAACCCTGGTAGTCC

>Otu21113

CCAGCCTACGGGTGGCAGCAGTGGGGAATTTTGGACAATGGGCGCAAGCCTGATCCAGCC  
ATGCCGCGTGTCTGAAGAAGGCCTTCGGGTGTAAAGGACTTTTGTACAGGGAGGAAATCC  
CTAAGGTAAATACCCTTGGGGGATGACAGTACCTGAAGAATAAGCCCCGGCTAACTTCGT  
GCCAGCAGCCGCGTAATACGAAGGGGGCTAGCGTTGTTTCGGAATCACTGGGCGTAAAGC  
GCACGCAGGCGGATTGATAAGTCAGGGGTGAAATCCCGGGGCTCAACCTCGGAATTGCCT  
TTGATACTGTCTGTCTTGAGTTCGGGAGAGGTTGGCGGAATCCCTAGTGTAGAGGTGAAA  
TTCGTAGATATTAGGAAGAACACCAGTGGCGAAGGCGGCCAACTGGCCCCGATACTGACGC  
TCATGTGCGAAAGCGTGGGGAGCAAACAGGATTAGATACCCAGTAGTCC

>Otu21125

CCAGCCTACGGGGGGCAGCAGTCGAGAATCTTCCGCAATGGACGAAAGTCTGACGGAGCG  
ACGTTACGTGAATGAAGAAGCTCTTCGGAGTGTAAGTTCTTTTCTATGGGAGGAAGCCG  
CAAGGCAGACAGTACCATAGGAATAAGGGGATCCTAATTCTGTGCCAGCAGGAGCGGTAA  
GACAGAATCCCCGAGCGTTACCCGATTATTTGGGCGTAAAGGGTCCGTAGGTGGTTTAG  
TAAGTTGAAAGTTAAATCTCATCGGCTTAACCTTTGAGGTGCTTTCAATACTGCTAGACT  
TGAGGGCGTTAGGGGTGATCGGAACCGACGGAGTAGGGGTGAAATCCGTTGATATCGTCG  
GGAACACCAAAAGCGAAGGCAGATCACTAGGACGACCCTGACACTGAGGGACGAAAGCGT  
GGGGAGCAAACAGGATTAGAGACCCGAGTAGTCC

>Otu21145

CCAGCCTACGGGTGGCACCAGTGGGGAATCTTGGACAATGGGGGAAACCCTGATCCAGCC  
ATGCCGCGTGAGTGATGAAGGCCTTAGGGTGTAAAGCTCTTTCGCCCACGACGATGATG  
ACGGTAGTGGGAGAAGAAGCCCCGGCTAACTCCGTGCCAGCAGCCGCGGTAATACGGAGG  
GGGCTAGCGTTGTTTCGGAATTACTGGGCGTAAAGCGCACGTAGGCGGCTTGGTAAGTTGG  
GGTGAAATCCCCGGGGCTCAACCTCGGAATTGCCTTCAAGACTGCTCGGCTTGAGTTCGG  
GAGAGGTGAGTGGAATTTCCAGTGTAGAGGTGAAATTCGTAGATATTGGGAAGAACACCG  
GTGGCGAAGGCGGCTCACTGGACCGACACTGACGCTGAGGCGCGAAAGCGTGGGGAGCAA  
ACAGGATTAGAGACCCGTGTAGTCC

>Otu21147

CCAGCCTATGGGTGGCAGCAGGCGCGAAACCTTTACAATGCGCGAAAGCGTGATAAGGGA  
ACTCTGAGTGGCAGCCGGCTTTCGCCGACTGTCTTTTGGCGAACCTAAACCGTTTCGAGA  
ATAAGTTCTGGGTAAAGACCAGTGCCAGCCGCCATGTGCTTACTGCACAATAGCGCACGGT  
ACGCGGTAATACTGGCAGAACGAGTGGTGCCACGAATATTGGGTCTAAAGAGACCGTAG  
CTGGCCTGTAAAGTCCACTGTGAAATCTTGGGGCTCAACCTCAAGGCGTGCAGTGGATAC  
TGGCAGGCTTGAGAGCGGGGAGGTCAGGGGTACTTACGGGGTAAGGGTAAAATCTGTTG  
ATCCTGTAAGGACCACCAGTGGCGAAGGCGCCTGACCAAAACGCGTCTGACAGTGAGGGT  
CGAAAGCTGGGGGAGCAAACCGGATTAGAGACCCGCGTAGTCC

>Otu21159

CCAGCCTACGGGAGGCAGCAGTGGGGAATATTGCACAATGGACGAAAGTCTGATGCAGCG  
ACGCCGCGTGAGGATGAAGGTTTTTCGGATCGTAAACTCCTGTAAAGAGGGAAGAAAGAA  
TCATGGCTAATATCCATGAGAGATGACGGTACCTCTAGAGAAAGCTCCGGCTAACTTCGT  
GCCAGCAGCCGCGTAATACGAAGGGAGCAAGCGTTATTTCGGATTTACTGGGTGTAAAGG  
GCGTGTAGGCGGTTTATTAAGTCAGTTGTTAAATACCATGGCTTACCTGTGGAACAGCAA  
TTGATACTGATAAACTAGAGGACAAGAGAGAGGAGTGGAATTCTCGGAGTAGCGGTAAAA  
TGCGTAGATCTCGAGAGGAACACCGATGGCGAAGGCAGCTCTTTGGCTTGTACCTGACGC  
TGAGACGCGAAAGCGTGGGGAGCAAACAGGATTAGAAACCCGAGTAGTCC

>Otu21169

CCAGCCTACGGGAGGCAGCAGTTAGGAATTTTGCACAATGGACGAAAGTCTGATGCAGCG  
ACATCGCGTGTGGGATGAAGGCCTTCGGGTCTGTAACCACTTTTGCCAGATATTACTTTC  
TGGTGAATAAGGAACTACTAACTACGTGCCAGCAGTCGCGGTAATACGTAGGTTCCAAGC  
GTTACCCGGTTTTATTGGGCGTAAAGCGTCTGTAGGTGGTTTTTCAAGTCTTATTTCAA  
GCCCCAGCTCAACTGGGGAAAGGGGTAGGAGACTGAAAGGCTTGAGTGATATCGGAGTT  
ACTGGAATTTGTAGTGTAGGGGTAAAATCCGTGGATACTACAAAGAACACCAAGCGCGAA  
GGCGGGTAACTAGGTATTTACTGACACTCAGAGACGAAAGCTAGGGAAGCAAATCAGATT  
AGAAACCCGTGTAGTCC

>Otu21186

CCAGCCTATGGGGGGCAGCAGCTAAGAATCTTCTGCAATGGACGAAAGTCTGACAGAGCG  
ACGCCGCGTGAACGATGAAGGCCGCAAGGTTGTAAAGTTCTTTTCTTTGTGAGGAATAAG  
GGGCAGAGGAAATGCTGTCTTGATGACGTAAGCGAAGGAATAAGCCCCGGCCAATTACGT  
GCCAGCAGCCGCGTAATACGTATGGGGCGAGCGTTGTTTCGGAATCACTGGGCGTAAAGC  
GTACGCAGGCGGATTGATAAGTCAGGGGTGAAATCCCGGAGCTCAACTTCGGAATTGCCT  
TTGATACTGTCTATCTTCGAGTTCGGGAGAGGTTGGCGGAATTCCTAGTGTAGAGGTGAA  
ATTCGTAGATATTAGGAAGAACACCAGTGGCGAAGGCGGCCAACTGGCCCCGATACTGACG  
CTGAGGCACGAAAGCGTGGGGAGCAAACAGGATTAGAAACCCTAGTAGTCC

>Otu21190

CCAGCCTATGGGGCGCAGCAGTGGGGAATATTGCACAATGGGCGCAAGCCTGATGCAGCG  
ACGCCGCGTGAGGATGACGGTCTTCGGATTGTAAACTCCTGTAAAGTGGGACGAAAGAC  
CAGTATCTAATACATACTGGGGATGACGGTACCGCTAGAGAAAGCACCGGCCAACTTCGT  
GCCAGCAGCCGCGTAATACGAAGGTTGCAAGCGTTATTCGGAATGACTGGGCGTAAAGA  
GCGTGAAGGCGGCTTCCTAAGTTACCTGTAAATAGCTCGGCTTAACTGAGCAAATGCTG  
GTGATACTGGGAGGCTAGAGTGCAGGAGAGAAAGGTAGAATTCTCGGAGTAGCGGTAAAA  
TGCGTAGATCTCGAGAGGAATACCGGTTGCGAAGGCGGCCTTTTGGCCTGTAAGTACGCG  
TCAAGCGCGAAAGCGTGGGGAGCAAACAGGATTAGAGACCCGCGTAGTCC

>Otu21193

CCAGCCTACGGGGGGCTGCAGCAAGGAATATTGCGCAATGGGCGAAAGCCTGACGCAGCG  
ACGCCGCGTGAGGGAAGAAGGCCTTCGGGTCGTAAACCTCTTTTCTTTGGGGAAGAATAAT  
GACGGTACCCAGGGAATAAGTCACGGCTAACTACGTGCCAGCAGCCGCGTAATACGTAG  
GCGGCGAGCATTATCCGGATTTACTGGGCGTAAAGAGGGCGTAGGTGGTTTTTCAAGTCG  
GATGTGAAATTTCCCGGCTCAACTGGGAAGGGTCATTCGATACTGTTAGACTAGAGGGCA  
GCAGAGGGAGGTGGAATTTCCCGGTGTAGTGGTGAATGCGTAGATATCGGGAGGAACACC  
AGTGGCGAAAGCGGCCTCCTGGGCTGTTCTGACACTGAGGCCCGAAAGCGTGGGTAGCA  
AACAGGATTAGATACCCTTGTTAGTCA

>Otu21202

CCAGCCTACGGGAGGCTCCAGTCGAGAATCTTTCGCAATGGACGAAAGTCTGACGAAGCG  
ACGCCGTGTGAGCGAAGAAGGCCTTCGGGTTGTAAAGCTCTTTCGCCTGGGAACAAGAAA  
GTGGTGTGAATAACACCGCGATTTGAGGGTACTAGGTAAAGAAGCACCGGCTAACTCCGT  
GCCAGCAGCTGCGTAATACGGAGGGTGCAAGCATTAATCGGAATTATTGGGCGTAAAGG  
GCGTGTAGGCGGTTTTGTAAAGTCAGATGTGAAATTCAGGACTCAATTTTGGAGCTGCAT  
TTGAAACTGTAAAGACTAGAGGGTAGGCGGAGAAAACGGAATTCACATGTAGCGGTGAAA  
TGCGTGGATATGTGGAAGAACACCGGTGGCGAAAGCGGTTTTCTAGCTTATTCCTGACGC  
TGAGGCGCGAGAGCAAGGGGAGCAAACAGGATTAGATACCCCGTAGTCC

>Otu21205

CCAGCCTACGGGAGGCTCCAGCGGCAGTAAAAAGATCTGCAACTAATTTTTCGCTAATAG  
GAGTTCGAGGGGCTACTTTTCTATCCTGCCTCGCGTAACCATAGTAAGGCACCAACGCAG  
TAATTTCTTTGGCACTTGCCCGTTTTAGAGCATCAATCGTGATGAGTAATTCATGAGAG  
TATCATTGGCAGGTAGACATGTACTTTGAATCACGTAAACATCACGTCCACGGACATTTT  
CGCCAATCTCAACAAACACTTCGCCATCACTAAAGCGGCGGACATCGGCATGACCTAGCG  
GTTTTCCCAACTTTTCAGAAATCTTTTGGGCTAACGGACGGTTTTGCACTTCCCGATAAAA  
TGACCCAATCTCTCATGCGCATGTTTCATGGGATACCTTAACCTCTGGAAAGTCTCAAGAG  
ATCTTGAGGCTATACGTCAAACTTTAGTAGACCTTTATTAGATACCCGTGTAGTCC

>Otu21217

CCAGCCTATGGGAGGCAGCAGTTGGGAATCTTTCGCAATGGGCGAAAGCCTGACGAAGCG  
ACGCTGCGTGAGCGATGAAGGCCTTCGGGTTGTAAAGCTCTTTCGCATGGGAACAAGAAA  
AAGGCGTGAATAACGTCTTAATTTGAGTGTACTATGATAAGAAGCACCGGCTAACTCCGT  
GCCAGCAGCTGCGTAATACGGAGGGTGCAAGCATTAATCGGAATAATTGGGCGTAAAGG  
GCGCGTAGGCGGGTAGATAAGTCAGATGTGAAATTCGAAGCTCAACTTCGGAGCTGCAT  
TTGAAACTATATATCTTGAGGGATGGCGGAGAAAAGTGGAAATTCACGTGTAGCGGTGAAA  
TGCGTAGATATGTGGAAGAACACCTGTGGCGAAAGCGGCTTTCTAGCTATTACCAGACGC  
TGAGGCGCGAGAGCAAGGGGAGCAAACAGGATTAGAGACCCAGTAGTCCC

>Otu21220

CCAGCCTATGGGTGGCACCAGGACTATTGCCGATTGAACGGCATAGAGAACTACGAACTT  
TTTACCGATGAGAACCAGGCGGTACGAAGGCATCCCGTCCAGCCCTGGATAGGATGATG  
GCTCCATTAAAAACAATGAGGCGTCATGCGTGGTGGTCTATTTCGTTCTCGAGGTTTCGCG

AGAAGCACGACGCACATGCTTAACGGGCTAGAAATCATGAAGGCCCATGGGTGCAATTTT  
GTTTCGATCACGAAAAGATCGATACTACCTCCCCCATTTGGAAAAGCTGTCTTCGTGATT  
ATTTTCGGCCATCGCGGCCCTAGAGCGTGATTTGATCGCAGAGCGGGTTCGCAACGGCTTA  
GCCAATGCTAGGGCAAAGGAAAAATCATCGGTGCAAAAAACTTCGGGATTAGAGCTT  
ATTAGATACCCTTGTAGTCC

>Otu21229

CCAGCCTACGGGTGGCTCCAGTGGGGAATCTTGCGCAATGGGCGAAAGCCTGACGCAGCG  
ACGCCGCGTGAGTGATGAAGGCCTTCGGGTGTAAAGCTCTGTGGGGAGAGACGAATAAG  
TGTGGCCAATATCCAGCATGATGACGGTATCTCCTTAGCAAGCACCGGCTAACTCTGTG  
CCAGCAGCCGCGGTAAGACAGAGGGTGCAAACGTTGTTTCGGAATTACTGGGCGTAAAGCG  
TGTGTAGGCTGCTAAGTAAGTCGGATGTGAAAGCCCTGGGCTCAACCCAGGAAGTGCCT  
CGATACTGCATAGCTAGAGTACTGGAGAGGTTGGTGGAATTCTCGGTGTAGAGGTGAAAT  
TCGTAGATATCGAGAGGAACACCGGTGGCGAAGGCGGCCAACTGGACAGATACTGACGCT  
GAGACACGAAAGCGTGGGGAGCAAACAGGATTAGATACCCTCGTAGTCC

>Otu21237

CCAGCCTATGGGGGGCAGCAGTGAGGAATATTGGTCAATGGACGCAAGTCTGAACCAGCC  
ATGCCGCGTGAAGGATGAAGGCCTTCTGGGTGTAAACTTCTTTTACCTGGGAAGAAACC  
TCTGTTTTTCTAATAGAGTTGACGGTACCAGAGGAATAAGCACCGGCTAACTACGTGCCAG  
CAGCCGCGGTAATACGTAGGGTGCAAGCGTTAATCGGAATTACTGGGCGTAAAGCGTGCG  
CAGGCGGTTTGTCTAAGTCAGCTGTGAAATCCCCGGGCTTAACCTGGGAATGGCAGTTGAG  
ACTGGCAGGCTAGAGTGTGTCTAGAGGGGGGTAGAATTCACAGTGTAGCAGTGAAATGCGT  
AGAGATGTGGAGGAATACCGATGGCGAAGGCAGCCCCCTGGGATAACACTGACGCTCATG  
CACGAAAGCGTGGGGAGCAAACAGGATTAGAGACCCGAGTAGTCC

>Otu21243

CAGCCTACGGGGGGCAGCAGTGGGGAATATTGGACAATGGGCGCAAGCCTGATCCAGCAA  
TGCCGCGTGGGTGAAGAAGGTCTTCGGATTGTAAAGCCCTTTCGACGGGGACGATGATGA  
CGGTACCCGCTAGAAGAAGCCCCGGCTAACTTCGTGCCAGCAGCCGCGGTAATACGAAGGG  
TGCAAGCGTTGTTTCGGAGTTACTGGGCGTAAAGGGTGCGTAGGCGGTCTTTTAAAGTTTG  
TGTGAAATCTCCCGGCTCAACCGGGAGGGTGCGCCGAATACTGAGAGGCTAGAGTGTGGG  
AGAGGAAAGTGGAATTCCTGGTGTAGCGGTGAAATGCGTAGATATCAGGAGGAACACCGG  
TGGTGTAAACGGCTTTCTGGACCATAACTGACGCTGAAGCACGAAAGCGTGGGTAGCAAA  
CAGGATTAGAAACCCGAGTAGTCC

>Otu21244

CCAGCCTACGGGTTCGCACCAGACCCGAGGAATCCAGGCCTTTTTTGCACATACACGGGCTC  
GCCGATCGCGATCACGATGCGGGCGAACGGCATGGGGATCACGAAGCGGTCCCATTGGAT  
TTTCCACGCCCCGCGACGCCGCGTACGCCAGCGGAATGATCGGGCGCTGCGACAACCTGCGC  
CAGCAACACCCGCGCCCGCTTGAACCTCCAGGGTGGGCCGCGCGGACCATCCGGCGTGAT  
CGCGGGCGAGATGTCCTCATGTGCGAGGGCCTGGTAATAGTCACGCAGTGCGCGGGCGCC  
GGTATGGGAGGACGAGCCGCGGATCACCTCGCCGCCAAGCGGCGCACCAACATCGCACC  
AATTTGCGCGTCAACCGACGGGCTGATTAGAAACCCTGGTAGTCC

>Otu21256

CCAGCCTATGGGTTGCACCAGTGGGGAATATTGGACAATGGGGGCAACCCTGATCCAGCC  
ATGCCGCGTGAGTGATGAAGGCCTTCGGGTGTAAATTCCTTTTACGCGGGGACGATAATG  
ACGGTACCCGCGAGAAGAAGCTCCGGCTAACTTCGTGCCAGCAGCCGCGGTAATACGAAGG  
GGGCTAGCGTTGCTCGGAATTACTGGGCGTAAAGGGCGCGTAGGCGGACAGTTTAGTCAG  
AGGTGAAAGCCCAGGGCTCAACCTTGGAACCTGCCTTTGATACTGGCTGTCTAGAGTGCGG  
GAGAGGTGTGTGGAACCTCCGAGTGTAGAGGTGAAATTCGTAGATATTTCGGAAGAACACCA  
GTGGCGAAGGCGACACACTGGCCCGTAACTGACGCTGAGGCGCGAAAGCGTGGGGAGCAA  
ACAGGATTAGAGACCCTGGTAGTCC

>Otu21274

CCAGCCTACGGGTTGCAGCAGTGGGGAATTTTGGACAATGGGGGCAACTCTGATCCAGCA  
ATGCCGCGTGAGTGAAGAAGGCCTTCGGGTGTAAAGCTCTTTTGTCCGGGAAGAAACGG  
CATCTCCTAATACGGGATGCTACTGACGGTACCGGAAGAATAAGCACCGGCTAACTACGT  
GCCAGCAGCCGCGGTAATACGTAGGGTGCAAGCGTTAATCGGAATTACTGGGCGTAAAGC  
GTGCGCAGGCGGTTATGTAAGTCAGCTGTGAAATCCCCGGGCTTAACCTGGGAATGGCAG  
TTGAGACTGCATGGCTAGAGTGTGTCTAGAGGGGGGTAGAATTCACAGTGTAGCAGTGAAA  
TGCGTAGAGATGTGGAGGAATACCGATGGCGAAGGCAGCCCCCTGGGATAACACTGACGC  
TCATGCACGAAAGCGTGGGGAGCAAACAGGATTAGAAACCCTCGTAGTCC

>Otu21335

CCAGCCTACGGGTCGCTGCAGTCGAGGATCTTTCGCAGTGGGCGAAAGCCTGACGGAGCG  
ACGCCGTGTGATCGATGAAGGCCTTCGGGTGTAAAGATCTCTCGCATGGGAACAAGAGA  
GAATCGTGAATAACGGTTTAATTTGAGGGTACCAAGTAAAGAAGCACCGGCTAACTCCGT  
GCCAGCAGCTGCGGTAATACGGAGGGTGCAAGCATTAATCGGAATTATTGGGCGTAAAGG  
GCGCGTAGGCGGAAATCCAAGTCAGATGTGAAATACCGGGGCTCAACTTCGGTGCTGCAT  
TTGAGACTGTTTTTCTAGAGGGTAGAAGGAGAAAATGGAATTCACAAGTAGCGGTGAAA  
TGCGTAGATATGTGGAAGAACACCGGTGGCGAAGGCGGTTTTCTATTTTATTCCTGACGC  
TGAGGCGCGAAAGCAAGGGGATCAAACAGGATTAGAAACCCCTGGTAGTCC

>Otu21339

CCAGCCTATGGGAGGCTCCAGTGAGGAATATTGCGCAATGGGCGAAAGCCTGACGCAGCG  
ACGCCGCGTGAGGATGAAGGTCTTAGGATTGTAAACTTCTGTTAAACGGGAAGAAATGC  
GCGATTCTAATAAAGTCGTGAGATGACGGTACCGTTAGAGAAAGCACTGGCTAATCTCGT  
GCCAGCAGCCGCGGTAATACGAGAGGTGCGAGCGTTATTCGGAATTATTGGGCGTAAAGG  
GTGCGCAGACGGTTTTGTTAAGTCAATTGTTTAATTCCTCGGCCTAACTGAGGGTCAGCAG  
TAGAAACTGATAAACTAGAGTATGAGAGAGGGAAGTGGAATTCCTCGGAGTAGCGGTAAAA  
TGCGTAGATCTCGAGAGGAACACCGATGGCGAAGGCAGCTTCCTGGCTCATTACTGACGT  
TCATGCACGAAAGCGTGGGGAGCAAACAGGATTAGAAACCCCTGTAGTCC

>Otu21346

CCAGCCTATGGGTTGCTGCAGTGGGGAATATTGGATAATGGGGGAAACCCCTGATCCAGCC  
ATGCCGCGTGAGGATGAAGGCCTTCGGGTCGTAAACTGCGGTAGTATGATAAGAATGTA  
AATGACTGTCATACGGAAAGAGGTGGGTAACCTACGTGCCAGCACCAGCGGTAATACGTAG  
ACCTCAAGCGTTATTCGGATTTATTGGGCGTAAAGCGCACGTAGGAGGTTTTGCGCGTCT  
TTTGTAAAGCCAGGGCCTAACCCTGGAAGTGCGGGAGATACGGCAGAACTAGAGGAGG  
TTAGAGGTGCATGGAACCTACGGTGTAGGGGTGAAATCCGTTGATATCGTGGGGAAACACC  
AAAGGCGAAGGCAGTGCAGTGGGACCTTCCTGACTCTGAGTTGCGAAAGCGTGGGGAGCA  
AAAAGGATTAGATACCCTTGTTAGTCC

>Otu21359

CCAGCCTATGGGGCGCTGCAGTCGAGAATTTTTCTCAATGGGCGAAAGCCTGAAGGAGCG  
ACGCCGCGTGGGGGATGAATGGCTTCGGCCCGTAAACCCCTGTCATTTGTGAACAAATTA  
ATCTACCCAACACGTGGATTATTGATAGTAACGGAAGAGGAAGGGACGGCTAACTCTGTG  
CCAGCAGCCGCGGTAATACAGAGGGTGCGAGCGTTGTTTCGGAATTATTGGGCGTAAAGGG  
CGCGTAGGCGGTGCCACAAGTCACTTGTGAAATCCCCAGGCTTAACCTGGGGCCTGCAGG  
CGAAACTGTGGTGCTGGAGTATGGGAGAGGTGCGTGGAATTCCTGGTGTAGCGGTGAAAT  
GCGTAGATATCGGAAGGAACACCTGTGGCGAAAGCGGCTCACTGGACCACAACCTGACGCT  
GATGCACGAAAGCTAGGGGAGCAAACAGGATTAGATACCCTTGTTAGTCC

>Otu21394

CCAGCCTATGGGGGGCTGCAGTGGGGAATCTTGCAGCAATGGGCGAAAGCCTGACGCAGCA  
ACGCCGCGTGAGTGATGAAGGCCTTCGGGTCGTAAAGCTCTGTTGTACGGGAAGAACGCG  
GATACAGCTAACATCTGTATCCGGTGACGGTACCGTATAAGAAAGGACCGGCTAACTTCG  
TGCCAGCAGCCGCGGTAAGACGGGGGGTCCAAGCGTTGTTTCGGAATCATTTGGGCGTAAAG  
CGTGTGCAGGTGGTTTTTGAAGTTAGATGTGAAAGCCTCGGGCTCAACCCGAGAAGTGCA  
TTTAAAACTACAAAACCTTGAGGAAGGAAGAGGGTTCGTGGAATTCAGGTGTAGTGGTGAA  
ATACGTAGATATCTGGAGGAACACCGGTGGCGAAGGCGGCGACCTGGTCCTATACTGACA  
CTCATACAGAAAGCGTGGGGATCAAACAGGATTAGAAACCCCGTAGTCC

>Otu21401

CCAGCCTACGGGTCGCACCAGTAGGGAATATTGGGCAATGGGGGCAACCCTGACCCAGCC  
ATGCCGCGTGAGGAAGAAGGCCCTCTGGGTGTAAACTGCTTTTGAACGGGAAGAAAAC  
ACCATGCGTGGTGCTATGACGGTACCGTTAGAATAAGCCACGGCTAACTACGCGCCAGCA  
GCCGCGGTAATACGTAGGTGGCAAGCGTTGTCCGGATTTATTGGGTTTAAAGGGTGCCTA  
GGCGGTTCTTTAAGTCAGTGGTGAAATACTTCGGCTCAACCGGAGAGGTGCCAATGATAC  
TGGGGGACTTGAGTACAGACGAGGTAGGCGGAATTGACGGTGTAGCGGTGAAATGCATAG  
ATATCGTCAAGAACACCGATAGCGAAGGCAGCTTACTAGACTGTAACCTGACGCTGATGCA  
CGAAAGTGTGGGGATCAAACAGGATTAGAAACCCCGTAGTCC

>Otu21403

CCAGCCTATGGGTGGCTGCAGACGAGAATATTCGACAATGGGCGAAAGCCTGATCGAGCG  
ACGCCGCGTGGTTGATGAAGTCCTTCGGGACGTAAAAACCTTTTATGAGGGAGGAAGTAA  
TTGACGTTACCTCATGAATAAGGGGCTCCTAACTCTGTGCCAGCAGGAGCGGTAATACAG



AGGCCCCAAGCATTATCCGGAATCACTGGGCGTAAAGGGTGTGTAGGCGGCCGTGTTAGT  
CTTTCGTGAAAGATCCTGGGCTCAACCCAAGAGACGCGGAGGAAACGGCACGACTCAGAG  
GACGTAAGAGGTAAAGGGAACATCATGGTGTAGGGGTGAAATCCGTTGATATCATGGGGAA  
CACAAAAGCGAAGGCAATATACTGGCGCACTCCTGACGCTGAGACACGAAAGCGTGGGA  
ATCGAACGGGATTAGAAACCCCTGTAGTCC

>Otu21408

CCAGCCTATGGGTGGCTCCAGTGGGGAATCTTGACACAATGGAGGAACTCTGATGCAGCG  
ACGCCGCGTGAGCGATGAAGCCCCCTCGGGGTGTAAAGCTCTTTCGGCAGGAACGATAATG  
ACGGTACCGGAAGAAGAAGCCCCGGCTAACTTCGTGCCAGCAGCCGCGGTAATACGAGGG  
GGGCGAGCGTTGTTCCGAATTATTGGGCGTAAAGGGTGCGTAGGCGGTTTTGTAAGTCTT  
ATGTGAAATCTATGGGCTCAACTCATAGACTGCATGAGAACTGCAGGGCTTGAGTGTGG  
GAGGGGTGAGTGGAATTTCCGGTGTAGCGGTGAAATGCGTAGATATCGGAAGGAACACCT  
GTGGCGAAAGCGGCTCACTGGACCACAACCTGACGCTGAGGCGCGAAAGCGTGGGTAGCAA  
ACAGGATTAGAAACCCCTTGTAAGTCC

>Otu21410

CCAGCCTATGGGTGCGCTGCAGTAGGGAATATTGGACAATGGGTGAGAGCCTGATCCAGCC  
ATGCCGCGTGACAGGAAGAAGGCCTTCTGGGTGTAAACTGCTTTTGCCAGGGGATAAAAAG  
GCCCTTGCGAGGGAACCTTGAAGGTACCTGGTGAATAAGCCACGGCTAACTACGTGCCAGC  
AGCCGCGGTAATACGTAGGTGGCAAGCGTTGTCCGGATTTATTGGGTTTAAAGGGTGCGT  
AGGCGGTCTTTAAGTCAGTGGTGAATACTTCGGCTCAACCGGAGAGGTGCCAATGATA  
CTGGGGGACTTGAGTACAGACGAGGTAGGCGGAATTGACGGTGTAGCGGTGAAATGCATA  
GATATCGTAAGGAAGACCAGTGGCGAAGGCGAATCTCTGGACAGTTACTGACGCTGAGGC  
ACGAAGGCCAGGGGAGCAAACGGGATTAGAAACCCGCGTAGTCC

>Otu21415

CCAGCCTATGGGGTGCAGCAGTGGGGAATTTTGCGCAATGGGGGAAACCCTGACGCAGCA  
ACGCCGCGTGAGAGGATGAAGCCCCCTTGGGGCGTAAACTCCTTTTCGACCAAGACGATAATG  
ACGGTACTGGTGGAAGAAGCACCGGCTAACTACGTGCCAGCAGCCGCGGTAATACGTAGG  
GTGCAAGCGTTGTCCGGAATTACTGGGCGTAAAGGGTCTGTAGGCGGTGTGGCAAGTTGG  
AAGTGAAATTTTCAGGGCTTAACCCCTGAAACTGCTTCCAAAACCTGCCGTGCTCGAGTGCGA  
GAGAGGCGAGTGGAATTGCAGGTGTAGCGGTGAAATGCGTAGATATCTGCAGGAACATAC  
GAGGCGAAAGCGGCTCGCTGGATCGCAACTGACGCTGAGAGACGAAAGCTAGGGGAGCAA  
ACAGGATTAGAAACCCCTCGTAGTCC

>Otu21425

CCAGCCTATGGGTGGCTGCAGTAAGGAATATTGCACAATGGAGGAACTCTGATGCAGCG  
ACGCCGCGTGAGTGATGAAGGACTTCGGTTCGTAAAGCTCTGTTGCAAGGGAAAAATAAA  
TTGATGGTACTTTGCAAGAAAGGTCGGCTAACTTCGTGCCAGCAGCCGCGGTAAGACAG  
AGGTCCCGAGCGTTGTTCCGATTTCATTGGGCGTAAAGGGTGTGTAGGAGTCCGGTAAAGT  
CAGGTGTGAAATCTCAGAGCTTAACTCTGAAACTGCGCTTGATACTGCTCGGCTAGAGGA  
TCGGAGGGGGTATCGGAATTTATGGTGTAGCAGTGAAATGCGTAGATATCATAAGGAACA  
CCGGTGGCGAAGGCGGATACCTGGAAGATTCTGACTCTGAAACACGAAAGCCAGGGGAG  
CAAACGGGATTAGATACCCAGTAGTCC

>Otu21432

CCAGCCTATGGGTGCGACCAGGCGCGAAACCTTCGCAATGCGCGAAAGCGTGACGAGGTT  
AGTCCGAGTGGCCTTCGCTGAGAAGGTCTTTTGCTAGCTGTAAAAAGGCTGGAGAATAAG  
GGGAGGGCAAGCCTGGTGTGAGCCGCCGCGGTAATACCAGCTCCTCGAGTGGTTCGGGCG  
ATTATTGGGCCTAAAGCATCCGTAGCCGGTTCGGTAGGTCCCCTGCTAAATCCAGTCGCT  
CAACGATTGGCCTGCAGGGGATACCGCCGGACTAGGAGGCGGGAGAGGAGGACGGTACTC  
CGCAGGTAGGGGTAAAATCCTTTGATCTGCGGAAGACCACAGTGCGGAAGGCGGTCTTC  
CAGAACGCGCTCGACGGTGAGGGATGAAAGCTGGGGGAGCGAACCAGGATTAGAGACCCTG  
GTAGTCC

>Otu21435

CCTATGGGGGGCTGCAGTGGGGGATATTGCACAATGGAGGAACTCTGATGCAGCGACGC  
CGCGTGAAAGGAAGAAGGTCTTCGGATTGTAAACTTCTTTAGCCGGGAAAGAAACCATGAC  
GGTACCCGGAGAATAAGCCACGGCTAACTACGTGCCAGCAGCCGCGGTAATACGTAGGTG  
GCAAGCGTTGTCCGGAATTACTGGGTGTAAAGGGTGCGCAGGCGGGACAATAAGTTGGAT  
GTGAAATACCCGGGCTCAACTCGGGTGTGCAATCAAAAACCTATTGTTCTTGAGTGAAGTA  
GAGGTAGGCGGAATTTCCCGGTGTAGCGGTGAAATGCGTAGATATCGGGAGGAACACCAGT  
GGCGAAGGCGGCCTACTGGGCTTTTACTGACGCTGAGGCACGAAAGCATGGGTAGCAAAC

AGGATTAGAGACCCCCGTAGTCC

>Otu21468

CCAGCCTACGGGTCGCTCCAGGCGCGAAGACTCTACAATGCAGGCAACTGCGATAGGGGA  
ACATCGAGTGGCATCCACCATGGATGTCTGTCCAATCGTCTAAAAACGATTGTCAGCAA  
GGGCCGGGCAAGACCGGTGCCAGCCGCCGCGTAATACCGGCGGCTCGAGTGGTGGCCGA  
TATTATTGAGTCTAAAACGTTCTGTAGCCGGTCTTGTAATCCTTGGGTAAATCGGCCAGC  
TTAACTGTCCGAAGTCCGGGGAGACTGCAAGACTTGGGATCGGGAGAGGTCAGAGGTACT  
TCTGGGGTAGGGGTAAAATCCTGTAATCCTAGAAGGACCACCGGTGGCGAAGGCGTCTGA  
CTAGAACGAATTCGACGGTGAGGAACGAAGCCCTGGGGCGCAAGCGGGATTAGATACCC  
AGTAGTCC

>Otu21480

CCAGCCTACGGGACGCTGCAGCTAAGAATATTCCGCAATGGACGAAAGTCTGACGGAGCG  
ACGCCGCGTGGATGACGAAGGCCGAAAGGTTGTAAAGTCTTTTGTGGGGAAGAATAAG  
CATGGGAGGAAAATGCCCGTGAGATGACATGAACCGACGAATAAGCCCCGGCTAACTACGT  
GCCAGCAGCCGCGTAACACGTAGGGGGCGAGCGTTGTTTCGGAATTACTGGGCGTAAAGG  
GCATGTAGGCGGCTCTGTAAGTCCGGCGTGGAAGCCACGGCTTAACCGTGGGATTGCGC  
TGAAACTGTGGGGCTTGAATCATGGAGAGGGAGCTAGAATTCCAGGTGTAGGGGTGAAA  
TCTGTAGAGATCTGGAAGAATACCAGTGGCGAAGGCGAGCTCCTGGCCAATGATTGACGC  
TGAGGTGCGAAAGTGTGGGGATCAAACAGGATTAGAGACCCAGTAGTCC

>Otu21500

CCAGCCTACGGTTGCTGCAGTGAGGAATATTGGTCAATGGACGGAAGTCTGAACCAGCCA  
TCCCGCGTGCAGGAAGAATGCGCTATGCGTTGTAAACTGCTTTTCCAGGGGAAGAAAACC  
CCCGACGCGTCGGGGCTTGGCGGTACCTTGGGAATAAGCATCGGCTAACTCCGTGCCAGC  
AGCCGCGTAATACGGAGGATGCGAGCGTTATCCGATTCAATTGGGTTTAAAGGGTGCGT  
AGGCGGACTGATAAGTCAGTGGTGAACCTGCAGCTTAACTGTAGAACTGCCATTGATA  
CTGTCGGAATTGAGTATGGTCAAGGTAGGCGGAATGTGTATGTAGCGGTGAAATGCATA  
GATATGACACAGAACACCGATTGCGAAGGCAGCTGACGAAACTGTAACGTACGCTGAGGC  
ACGAAAGCGTGGGGATCAAACAGGATTAGAAACCCTAGTAGTCC

>Otu21524

CCAGCCTACGGGTCGCAGCAGTGGGGAATTTTGCACAATGCCCGAAAGGGTGATGCAGCA  
ACGCCGCGTGAGGGATGAAGGCCTTCGGGTCTGTAAACCTCTTTTCGATCGGGAAAAATGGC  
TCTGTGAATAGCAGGGTCTGATGGTACCGGAAGAAGAAGCCCCGGCCAACCTACGTGCCAG  
CAGCCGCGGTAATACGTAGGGGGCGAGCGTTGTTTCGGAATTACTGGGCGTAAAGGGCGTG  
TAGGCGGTGTGTAAGTTGGGCGTGAAATCCCCGGGCTTAACCCGGGGGGGCCGTCCAAG  
ACTGCCATGCTAGGGTGCGGGAGAGGGCAGTGGAATTCCCGGTGTAGCGGTGAAATGCGT  
AGATATCTGCAGGAACACCCGTGGCGAAAGCGGCGCGCTGGACCACAACCTGACGCTGAGG  
AACGAAAGCTAGGGGAGCAAACAGGATTAGATACCCCCGTAGTCC

>Otu21538

CCAGCCTACGGGGCGCTCCAGGCGAGAATATTCGACAATGGGCGAAAGCCTGATCGAGCG  
ACGCCGCGTGATGGATGAAGTGCTTCGGTACGTAAACATCTTTTATCGGGGAAGAACTAA  
TTGACGGTACCCGATGAATAAGGGGCTCCTAACTCTGTGCCAGCAGGAGCGGTAATACAG  
AGGCCCCGGGCGTTACCCGGAATCACTGGGCGTAAAGGTTGTCCAGGCGGCTTTGTAGT  
CTTTCGTAAAATCTGCGGGCTCAACCTGCAGCGCGGAGGGAAACGGCAAAGCTCGAGGG  
CGCGAGAGGTAGAGGGAACCTCACGGTGGAGGGGTGAAATCCGTTGATATCGTGGGGAAAC  
CCAAAGGCGAAGGCACTCTACTAGCGCGTTCTTGACGCTCACACACGAAAGCCAGGGGAG  
CGAACGGGATTAGAAACCCGAGTAGTCC

>Otu21553

CCAGCCTATGGGATGCAGCAGCTAAGAATATTCCGCAATGGACGAAAGTCTGACGGAGCG  
ACGCCGCGTGGATGACGAAGGCCGAAAGGTTGTAAAGTCTTTTGTGGGGAAGAATAAC  
CATGGGAGGGAATGCCCGTGGGATGACATGAACCGACGAATAAGCCCCGGCTAACTACGT  
GCCAGCAGCCGCGTAACACGTAGGGGGCGAGCGTTGTTTCGGAATTACTGGGCGTAAAGC  
GCACGCAGGCGGCTCGTTAAATTAGAAGTGAAAGCCCTGGGCTCAACCCGGGAATTGCTT  
TTAAGACTGGCGAGCTAGAATTCGGAAGAGGGCAGTGGAATTCCAAGTGTAGAGGTGAAA  
TCCGTAGATATTTGGAAGAACACCAAGTGGCGAAGGCGACTGCCTGGACCGATATTGACGC  
TGAGACGCGAAAGCGTGGGGAGCAAACAGGATTAGAAACCCTAGTAGTCC

>Otu21577

CCAGCCTACGGGGGGCACCAAGTGGGCAATATTGGACAATGGGCGAAAGCCTGATCCAGCA  
ATGCCGCGTGAATGATGAAGGCCTTAGGGTTGTAAAGTCTTTTCGGGTGGGACGATGATG

ACGGTACCACCAGAAGAAGCCCCGGCTAACTTCGTGCCAGCAGCCGCGGTAATACGAAGG  
GGGCTAGCGTTGTTTCGGATTTACTGGGCGTAAAGCGCACGTAGGCGGATCTTTAAGTCAG  
GGGTGAAATGCCGAGCTCAACTTCGGAAGTGCCTTTGATACTGGAGATCTTGAGTTCGG  
GAGAGGTGAGTGGAAGTGCAGTGTAGAGGTGAAATTCGTAGATATTCGCAAGAACACCA  
GTGGCGAAGGCGGCTCACTGGCCCCGATACTGACGCTGAGGCACGAGAGCGTGGGGAGCAA  
ACAGGATTAGAAACCCTCGTAGTCC

>Otu21596

CCAGCCTACGGGGTGCACCAGTGGGGAATCTTGCGCAATGGACGAAAGTCTGACGCAGCC  
ACGCCGCGTGAGTGGAGACGGCCTTCGGGTGTAAAGCTCTGTCGCCCCGGGACGAAAAAC  
CTTTAGGTTAACAGCCTAGAGGCGTGACGGTACCGGGAGAGGAAGCACCGGCTAACTCTG  
TGCCAGCAGCCGCGGTAATACAGAGGGTGCAAGCGTTGCTCGGAATTATTGGGCGTAAAG  
GGTAGGTAGGTGGTCTCGTTTGTCTGAGGTGAAAGCCCTGGGCTTAACCTGGGAAGTGCC  
TCGGAACGGCGAGACTGGAGTACTGGAGAGGTTTCGCGGAATTCCCGGTGTAGCGGTGAA  
ATGCGTAGAGATCGGGAGGAATACCAGAGGCGAAGGCGGCGAACTGGACAGTTACTGACA  
CTCAACTACGAAAGCGTGGGGATCAAACAGGATTAGATACCCTTG TAGTCC

>Otu21629

CCAGCCTATGGGTTCGACCAGTGGGGAATATTGCGCAATGGGGGAAACCCTGACGCAGCC  
ACGCCGCGTGAGTGAGGAAGGCCTTCGGGTGTAAAGCTCTGTCACCTGGGAAAAACGAC  
TATCTGGGGAAAGTTCAGGTAGTGTGATGGTACCAGGGGAGGAAGCACCGGCAAACCTCTG  
TGCCAGCAGCCGCGGTAATACAGAGGGTGCAAGCGTTGTTTCGGATTTACTGGGCGTAAAG  
CGTGCGTAGGCGGTATTGAGAGTCGCGGGTGAAATCCCAGGGCTTAACCTGGAAGTGCC  
TGCGAGACCTCAGTACTAGAGTATGAGAGGGGATGGTGGAATGCCAAGTGTAGCGGTGAA  
ATGCGTAGAGATTTGGCGGAACACCGGTGGCGAAGGCGACCATCTGGCTCATAACTGACG  
CTCAGGCACGAAAGCGTGGGGAGCAAACAGGATTAGAAACCCGCGTAGTCC

>Otu21630

CCAGCCTACGGGACGCACCAGTGGGGAATATTGGACAATGGGCGCAAGCCTGATCCAGCC  
ATGCCGCGTGAGTGAAGAAGGCCTTAGGGTTGTAAAGCTCTTTTGGCGGGGACGATAATG  
ACGGTACCCCGCAGAATAAGCCCCGGCTAACTTCGTGCCAGCAGCCGCGGTAATACGAAGG  
GTGCAAGCGTTATCCGGATTTACTGGGTTTTAAAGGGTGTGTAGGCGGGCTATTAAGTCAG  
TGGTGAAATCTCCGGGCTCAACCTGGAAACTGCCAATGATACTATTAGTCTTGAATTTTG  
TTGAGGTAGGCGGAATAAGTCATGTAGCGGTGAAATGCATAGATATGACTTAGAACACCA  
ATTGCGAAGGCAGCTTACTAAGCAAATATTGACGCTGAGGCACGAAAGCGTGGGGATCAA  
ACAGGATTAGAGACCCTCGTAGTCC

>Otu21648

CCAGCCTACGGGTTGCTCCAGTAACGAATCTTCCGCAATGCACGAAAGTGTGACGGAGCG  
ACGCCGCGTGAGTGAGGAAGCCCTTCGGGGTGTAAGCTACTGTCAGGGTTTAACAACCCCA  
TGAGTAAACCCAAAGGAAGAGGCGACTAACTCTGTGCCAGCAGTCGCGGTAATACAGAGG  
CCTCGAGCGTTAATCGGAATCACTGGGCTTAAAGGGTGCGTAGGCGGTCTCGTAAGTGCC  
TTGTGAAATCCCACGGCTCAACCGTGGAACGGCTCGGCAGACTGCGGGACTTGAGGTGG  
TAGGGGTTACTGGAAGTCTAGGTGGAGCGGTGAAATGCGTAGATATCTAGAGGAACGCCA  
AAGGTGAAGACAGGTAAGTGGGCCAATACTGACGCTGAGGCACGAAAGCGTGGGGAGCGA  
ACGGGATTAGAGACCCCCGTAGTCC

>Otu21681

CCAGCCTACGGGAGGCAGCAGTGGGGAATATTGGGCAATGGGCGCAAGCCTGACCCAGCC  
ACGCCGCGTGAGTGATGAAGGCCTTCGGGTGTAAGCTCTGTGGGGAGGGACGAACAAG  
CTTGGTGCTAATCAGCCAGGCCCTGACGGTACCTCCTTAGCAAGCACCGGCTAACCCTGT  
GCCAGCAGCCGCGGTAATACAGGGGGTGCAAACGTTGCTCGGAATTATTGGGCGTAAAGC  
GCACGTAGGCGGTCTTTTAAAGTCGGATGTGAAAGCCCTAGGCTCAACTTAGGAAGTGCAT  
CCGAAACTGAAAGGCTAGAGTACGACAGAGGGTCGCGGAATTCCCGGTGTAGAGGTGAAA  
TTCGTAGATATCGGGAGGAACACCGGTGGCGAAGGCGGTGACCTGGGTCGATACTGACGC  
TGAGGTGCGAAAGCGTGGGGAGCAAACAGGATTAGAAACCCAGTAGTCC

>Otu21691

CCAGCCTATGGGTTGCACCAGTGGGGAATTTTCCGCAATGGGCGAAAGCCTGACGGAGCA  
AGACCGCGTGAGGGAGGAAGGCTCTTGGGTGTAAACCTCTTTTCTCTGGGAAGAAAAAA  
ATGACGGTACCAGAGGAATCAGCATCGGCTAACTCCGTGCCAGCAGCCGCGGTAAGACGG  
AGGATGCAAGCGTTATCCGGAATGATTGGGCGTAAAGCGTCCGCAGGTGGCAAATCAAGT  
CTGCTGTTAAAGCGCAGGGCTTAACTCTGTAAAGGCAGTGGAAGTGAATTAGCTAGAGTA  
TGGTAGGGGTAGAGGGAATTTCCAGTGTAGCGGTGAAATGCGTAGAGATTGGGAAGAACA

TCGGTGGCGAAGGCGCTCTGCAGGACCATAACTGACACTCACAGGACGAAAGCTAGGGGA  
CGAATGGGATTAGATACCCCCGGTAGTCC  
>Otu21731  
CCAGCCTACGGGGGGCAGCAGTCGAGAATCTTCCGCAATGGACGAAAGTCTGACGGAGCG  
ACGCCGCGTGATTGATGAAGTCCCTATGGGACGTAAAGATCTTTTATGAGGGAAGAAGTT  
TATTGACGGTACCTCATGAATAAGAGGCTCCTAATCTCGTGCCAGCAGGAGCGGTAATAC  
GAGAGCCTCGAGCGTTATCCGGAATTATTGGGCGTAAAGGGTGCGTAGGTTGTTCTGCTA  
GTCTTTTGTAAATCCCCGAGCTTAACTTGGGTAGTGCAAAGGAAACGGTAGAACTTGAA  
AGTGCGAGAGGTGAATGGAACCTCATGGTGTAGGGGTGAAATCCGTTGATATCATGGGGAA  
CACAAAAGCGAAGGCAATTCAGTGGCGCATATTTGACACTGAAGCACGAAAGCGTGGGT  
AGCGAATGGGATTAGAAACCCCCGTAGTCC  
>Otu21741  
CCAGCCTACGGGACGCTGCAGTAACGAATATTCCGCAATGCACGAAAGTGTGACGGAGCG  
ACGCCGCGTGAGGATGAAGTTCTTCGGAATGTAACTCCTGTCAGGGGTAGAAAGTTC  
TGATCAACCCCAGAGGAAGTGGTGACTAACTCTGTGCCAGCAGTCGCGGTAATACAGAGA  
CCACAAGCGTTAGGCGGAATCACTGGGCTTAAAGCGTGTGTAGGCGGACTTCTAAGTGCC  
TTGTGAAATCCCACGGCTCAACCGTGGAACCTGCTGGGCATACTGGTTGTCTTGAGCCACC  
TAGGGGCAAGTGGAACAAATGGTGGAGCGGTGAAATGCGTAGATATCATTTGGAACGCCA  
ATGGTGAAAACAGCTTGCTGGGGGTGTGCTGACGCTGAGACACGAAAGCCAGGGGAGCGA  
ACGGGATTAGAGACCCCCGTAGTCC  
>Otu21742  
CCAGCCTATGGGGCGCAGCAGTAGGGAATATTGGTAATCTGCGAAAGCGGGAACCAGCAA  
CGCCGCGTGTGCGATGAAGGCCTTCGGGTGCTAAAGCACTTTTTGAGGGGACGAGGAAGG  
ACGGTACCCTCAGAATAAGTCTCGGCTAACTACGTGCCAGCAGCCGCGGTAACACGTAGG  
AGACTAGCGTTATCCGGATTTACTGGGCGTAAAGCGTGTGCAGGCGACTCGGATAGTTGG  
ATGTGAAAGCTCCTGGCTTAACTGGGAGAGGTCGTTCAATACTTCCAGACTAGAGGATGT  
GAGAGGAGAGTGGAATTCAGAGTGTAGTGGTGAAATGCGTAGATATTCGGAGGAACACCA  
GTGGCGAAAGCGGCTCTCTGGCACATTTCTGACGCTCATATGCGAAAGCTAGGGTAGCAA  
ACGGGATTAGATACCCGGGTAGTCC  
>Otu21761  
CCAGCCTACGGGTTCACCAGCAACGAATCTTCCCCAATGCCGGAACGGTGAGGGAGCG  
ACGCCGCGTGTGGGACGAAGTCTTTCGGGATGTAAACCACTGTTAGGGCTACGAAAGCAA  
CGGGGCCTAATACGCCCTAGTTGATCTAGTCCAGAGAAAGGGACGGCTAACTCTGTGCC  
AGCAGCCGCGGTAATACAGAGGTCCCAAGCGTTACTGAGAATCACTGGGTTTAAAGGGTG  
CGTAGGTGGTGCGTTAAGTCCGTTGTGAAATCCCTGGGCTCAACCCAGGAACTGCTTCGG  
ATACTGGCGCACTTGAGGCCGGTAGAGGTCAGTGAACAGACGGTGGAGCGGTGAAATGC  
GTAGATATCGTCTGGAACGCCGGTGGTGAAGACGGGTGACTGGGCCGGTTCTGACATTGA  
GGCACGAAAGCGTGGGGAGCGAACGGGATTAGAAACCCTTGTAGTCC  
>Otu21778  
CAGCCTTCGGGACGCTGCAGTGGGGAATATTGCGCAATGGCCGAGAGGCTGACGCAGCGA  
CGCCGCGTGTGGGATGAAGCTCTTCGGGGTGTAAACCACTGTTGCCCGGGACGAACGGGA  
GGATCAATCCTCCGTGACGGTACCGGGTGAGGAAGCACCGGCTAACTCCGTGCCAGCAGC  
CGCGGTAATACGGAGGGTGCGAGCGTTGTCCGGAATCACTGGGCGTAAAGGGCGCGTAGG  
TGGCCTTGTAAGCGGGTGGTGAAAGTCCGGGGCTCAACCCCGGATCTGCCATGCGGACTG  
CGAGGCTCGAGCACTGTAGAGGCCGGTGGAATTCGGGTGTAGCGGTGGAATGCGTAGAT  
ATCCGGAGGAACACCAAGTGGCGAAGGCGGCCGCTGGGCAGTGGCTGACACTGAGGCGCG  
ACAGCGTGGGGAGCAATCAGGATTAGATACCCTTGTAGTCC  
>Otu21795  
CCAGCCTACGGGTCGCTGCAGTGGGGAATATTGGACAATGGGCGCAAGCCTGATCCAGCA  
ATGCCGCGTGAGTGATGAAGGCCTTCGGGTGTAAAGCTCTTTCGCCCGCGAAGATGATG  
ACTGTAGCGGGAGAAGAAGCCCCGGCTAACTTCGTGCCAGCAGCCGCGGTAATACGAAGG  
GGGCTAGCGTTGTTTGAATTACTGGGCGTAAAGGGCGCGCAGGCGGTGATCAAGTCAG  
GCGTGAAAGCCCCGGGCTTAACCTGGGAATTGCGCTTGAGACTGGTCTGACTTGAGTTCGG  
GAGAGGTGAGTGGAATTCAGTGTAGAGGTGAAATTCGTAGATATTGGGAAGAACACCG  
GTGGCGAAGGCGGCTCACTGGACCGATACTGACGCTGAGGCGCGAAAGCGTGGGGAGCAA  
ACAGGATTAGAAACCCTCGTAGTCC  
>Otu21811  
CCAGCCTATGGGGTGCAGCAGTGGGGAATATTGGACAATGGGCGCAAGCCTGATCCAGCC

ATGCCGCGTGAGTGACGAAGGCCTTAGGGTTGTAAAGCTCTTTTGGCGGGGAAGATAATG  
ATGGTACCTACAGAAAAAGCTCCGGCTAACTTCGTGCCAGCAGCCGCGGTAATACGAAGG  
GAGCAAGCGTTACTCGGAATCACTGGGCGTAAAGCGCATGTAGGCTGACTTTCAAGTCAG  
AGGTGAAATCCCAGGGCTTAACCCTGGAATTGCCTTTGAACTGTAAGTCTTGAGTATGA  
CAGAGGATGGTGGAATTTCCAGTGTAGAGGTGAAATTCGTAGATATTGGAAGGAACACCG  
GTGGCGAAGGCGACCATCTGGGTCATTACTGACGCTGAGATGCGAAAGCGTGGGGAGCAA  
ACAGGATTAGAAACCCTCGTAGTCC

>Otu21819

CCAGCCTATGGGTCGCTGCAGTGGGGAATTTTGGACAATGGGCGCAAGCCTGATCCAGCC  
ATGCCGCGTGCGGGAAGAAGGCCTTCGGGTGTAAACCGCTTTTGTGAGGGAAGAAACGG  
TCTGGACTAATACTTCGGACTAATGACGGTACCTGAAGAATAAGCACCGGCTAACTACGT  
GCCAGCAGCCGCGGTAATACGTAGGGTGCAAGCGTTAATCGGAATTACTGGGCGTAAAGC  
GTGCGCAGGCGGCTTTGCAAGACAGATGTGAAATCCCCGGGCTCAACCTGGGAACTGCAT  
TTGTGACTGCAAGGCTGGAGTGCGGCAGAGGGGGATGAAATTCGCGTGTAGCAGTGAAA  
TGCGTAGATATGCGGAGGAACACCGATGGCGAAGGCAATCCCCTGGGCCTGCACTGACGC  
TGAGGCGCGAAAAGTGTGGGTAGCAAACAGGATTAGAAACCCGAGTAGTCC

>Otu21822

CCAGCCTACGGGTTGCAGCAGTCGAGAATATTCGTCAATGGGCGAAAGCCTGAACGAGCG  
ACACCGCGTGACAGGATGAAGGCCTTCGGGTGCTAAACTGCGGTAAATAGTTAACAATGCA  
AATGAGTGACTATTGGAAAGAGGTGGGTAACCTACGTGCCAGCACCAGCGGTAACACGTAG  
ACCTCAAGCGTTATCCGGATTTATTGGGCGTAAAGCGTGTGTAGGGGGTTTTGTGCGTCT  
TCTGTTAAAGCCACCGCCTAACGGTGGAAGTGCAGGAGATACGGCAAGACTAGAGGAGG  
TTAGAGGTGCATGGAACGCACGGTGTAGGGGTGAAATCCGTTGATATCGTGCGGAACACC  
AAAGGCGAAGGCAGTGCCTGGGACTTTCTGACCCTGAGACACGAAAGCGTGGGGAGCA  
AAAAGGATTAGAAACCCGGGTAGTCC

>Otu21840

CCAGCCTATGGGGTGCAGCAGTCGCGAAAACTTCACAATGGGGGCAACCCCGATGAGGGA  
ATTCCAAGTGCTAGCACTTTTTGTGTTAGCTGTTCTTTTGTCTAAAAACAAGAGAAGTA  
AGGGCCGGGTAAAGACGGGTGCCAGCCGCCGCGGTAATACCCGCGGCCCGAGTGGTGGTCG  
ATATTATTGAGTCTAAAGGGTCCGTAGCCGGCTTTGCAAGTCCTATGGGAAATCCAGCGG  
CTTAACCGTTGGGCTTTTCATGGGATACTACATTGCTTGGGACTGGGAGAGGTAGGAGGTA  
CTCAGGGGGTAGGGGTGAAATCCTGTAATCCTTTGGGGACCACCGGTGGCGAAGGCGTCC  
TACCAGAACAGGTCCGACGGTGAGGGACGAAAGCTAGGGGCACGAACCGGATTAGAAACC  
CTCGTAGTCC

>Otu21846

CCAGCCTACGGGAGGCTCCAGTGGGGAATATTGGACAATGGGCGCAAGCCTGATCCAGCA  
ATGCCGCGTGAATGATGAAGGCCTTAGGGTTGTAAAGCTCTTTCGGAAGGGACGAAACCG  
GCACGGGATAATAAACCGTGCCCTTGACGGTACCTTAAGAAGAAGCACCGGCTAACTCTG  
TGCCAGCAGCCGCGGTAATACAGAGGGTGCAAGCGTTGTTTCGGAATTATTGGGCGTAAAG  
CGCGTGTAGGCGGCAAGGCATGTCGGGTGTGAAAGCCCTCGGCTTAACCGAGGAAGTGCG  
CCCGAAACTATCTTGCTTGAGTACCGGAGAGGACGCGGGAACCTCCCGGTGTAGAGGTGAA  
ATTCGTAGATATCGGGAAGAACACCAGTGCGGAAGGCGGCCATCTGGACGGATACTGACG  
CTGAGACGCGAAAGCGTGGGGAGCAAACAGGATTAGAAACCCTCGTAGTCC

>Otu21862

CCAGCCTACGGGGGGCAGCAGTGGGGAATCTTGCGCAATGGGGGCAACCCTGATCCAGCA  
ATGCCGCGTGAGTGAAGAAGGCCTTCGGGTGTAAAGCTCTTTCGACGGGGACGATAATG  
ACGGTACCCGAAGAAGAAGCTGCGGCTAACTACGTGCCAGCAGCCGCGGTAATACGTAGG  
CAGCGAGCGTTGTTTCGGAATTACTGGGCGTAAAGAGTGCGTAGGCGGTGCTCTAAGTCTG  
TTGTGAAATCTCCCGGCTTAACCTGGGAGGGTGCGGCGGAAACTGGAGTGCTAGAGTGTGG  
GAGAGGTAAGCGGAATTCCTGGTGTAGCGGTGAAATGCGTAGATATCAGGAGGAACACCT  
GTGGTGTAGACAGCTTACTGGACCACGACTGACGCTGAGGCACGAAAGCGTGGGTAGCAA  
ACAGGATTAGAAACCCCGTAGTCC

>Otu21870

CCAGCCTATGGGGGGCAGCAGTGGGGAATATTGGGCAATGGGCGCAAGCCTGACCCAGCC  
ATGCCGCGTGAGTGATGAAGGCCTTCGGGTGCTAAAGCTCTGTGGGGAAGGACGAAACAG  
GCTCGGGATAATACTCCGGGTCTTGACGGTACTTCTTAGCAAGCACCGGCTAACTCCG  
TGCCAGCAGCCGCGGTAATACGGAGGGTGCAAACGTTGCTCGGAATCATTGGGCGTAAAG  
CGCACGTAGGCGGCACGTTAAGTTCGGATGTGAAAGCCCCGGGCTCAACCCGGAAGTGCA

TTCGAAACTGGCGAGCTTGAATATGGAAGAGGGTTCGCGGAATTCCTGGTGTAGAGGTGAA  
ATTCGTAGATATCGGGAGGAACACCAGTGGCGAAGGCGGCGACCTGGGCCAATATTGACG  
CTGAGGTGCGAAAGCGTGGGGAGCAAACAGGATTAGAGACCCCCGTAGTCC

>Otu21894

CCAGCCTATGGGTGGCTCCAGTCGAGAATTTTTCTCAATGGGCGAAAGCCTGAAGGAGCG  
ACGCCGCGTGGGGGATGAATGGCTTCGGCCCGTAAACCCCTGTCATTTGTGAACAAATTG  
CTTACCCAACACGTGAAGCATTGATAGTAACGGAAGAGGAAGGGACGGCTAACTCTGTG  
CCAGCAGCCGCGGTAATACAGAGGTCCCAAGCGTTGTTTCGGATTCACTGGGCGTAAAGGG  
TGCGTAGGTGGTCAGATAAGTCTGATGTGAAATCTCGGAGCTTTACTCCGAAACTGCATT  
GGAAACTATTTGGCTGGAGGGTTCGGAGGGGGGACTGGAATTCTCGGTGTAGCAGTGAAAT  
GCGTAGATATCGAGAGGAACACCAGTGGCGAAGGCGGGTCCCTGGACGACTCCTGACACT  
GAGGCACGAAAGCTAGGGGAGCAAACAGGATTAGAAACCCCGTGTAGTCC

>Otu21910

CCAGCCTATGGGTTGCACCAGTGGGGAATCTTGCGCAATGGACGAAAGTCTGACGCAGCC  
ACGCCGCGTGAAGGAGGCCTTCGGGTTGTAAAGCTCTGTCGCCCCGGGACGAAAAGC  
TTGAGGGTTAACAGCCCTCGAGTCTGACGGTACCGGGAAAGGAAGCACCGGCTAACTTCG  
TGCCAGCAGCCGCGGTAATACGAGGGGTGCAAGCGTTGCTCGGAATTATTGGGCGTAAAG  
GGCAGGTAGGTGGTCTCATTTGTCTGGGGTGAATCCTAGGGCTTAACCCCTAGAAGTGCC  
CCAGAAACGGTGAGACTGGAGTGCTGGAGAGGGTCGTGGAATTCCTGGGTGTAGCGGTGAA  
ATGCGTAGAGATCGGGAGGAACACCAGAGGCGAAGGCGGCGACCTGGACAGTGACTGACA  
CTCAACTGCGAAAGCGTGGGGAGCAAACAGGATTAGAAACCCCGGTAGTCC

>Otu21935

CCAGCCTATGGGTGGCTGCAGGCGCGAAAACCTTTACAATGCACGAAAGTGTGATAGGGGG  
ACTCAAAGTGCTTACAGTTTACTGTAGGCTTTTGCCAAGTCAAATCGCCTGGCGAATAA  
GTGGTGGGCAAGACTGGTGCCAGTCGCCGCGGTAACCCCAGCGCCACTAGTGGGAACAG  
TATTATTGGGCCTAAAGCGTCCGTAGCAGGTCTTCTAAATTGCTTGTGAAATCGCATAGC  
TTAACTATGCGGATTGCAGGTAGGACTGGAAGACTTGAGACCGGGAGAAAGTCGAAGGTAC  
TCAGAGGGGAGCGGTAAATGCGAGAATCCTCTGAAGACCACCTGTTGCGAAGGCGTTTCG  
ACAATAACGGGTCTGACTGTGAGGGACGAAAGCTAGGGGAGCGAACC GGATTAGAGACCC  
GAGTAGTCC

>Otu21964

CCAGCCTATGGGGGGCTGCAGTCGAGGATCTTCGGCAATGGGCGCAAGCCTGACCGAGCG  
ACGCCGCGTGCGGGATGAAGGCCTTCGGGTTGTAAACCGCCGTCGGAGTGGAGGAAATTC  
CATAGAGTAATCTTTATGGATTGACTAATACTCAGAGGAAGGACGGGCTAAGTTTCGTGCC  
AGCAGCCGCGGTAAGACGAACCGTCCAAACGTTATTTCGGATTCACTGGGCTTAAAGGGTG  
CGTAGGCGGCTCAGAAAGTAGGGTGTGAAAGCCCTCGGCTCAACCGAGGAATTGCGCCCT  
AAACTGCTGGGCTTGAGGAACGCAGAGGTAAAGCGGAACCTACGGTGGAGCGGTGAAATGC  
GTTGATATCGTAAGGAACACCAGGAGCGAAAGCGGCTTACTGGGCGTTTTCTGACGCTGA  
GGCACGAAAGCCAGGGGAGCAAACAGGATTAGAAACCCCGGTAGTCC

>Otu21972

CCAGCCTACGGGAGGCAGCAGTGGAGAATCTTGGTCAATGGGCGCAAGCCTGAACCAGCG  
ATGCCGCGTGAGTGATGAAGGCCTTCGGGTTGTAAAGCTCTGTGGGGCGGGACGAAAAAA  
CTACTTCTAACAGGAGTAGCCTTGACGGTACCGCCTTAGCAAGCACCGGCTAACTCTGTG  
CCAGCAGCCGCGGTAAGACAGAGGGTGCAAACGTTGCTCGGAATCACTGGGCGTAAAGGG  
CGTGTAGGCGGGACGGTAAGTCGGGCGTGAAATCCCTAGGCTCAACCTAGGAACTGCACT  
CGAAACTACCATTCCTTGAGTGTCGGAGAGGAAAGCGGAATTCCTGGTGTAGAGGTGAAAT  
TCGTAGATATCAGGAGGAACACCAGTGGCGAAGGCGGCGACCTGGTCCGATACTGACGCT  
GAGGCGCGAAAGCGTGGGGAGCAAACAGGATTAGATACCCTAGTAGTCC

>Otu21983

CCAGCCTACGGGAGGCAGCAGTGAAGGATATTGCACAATGGGCGCAAGCCTGATGCAGCG  
ACGCCGCGTGATGATGAAGGCCTTCGGGTCGTAAATCCTTTTGCGCGTGACGAGAAAT  
AGGACGGTAGCGCGCAATAAGTCTCGGCTAACTACGTGCCAGCAGCCGCGGTAAACGT  
AGGAGACAAACGTTATCCGGAGTTACTGGGCGTAAAGGGCGTGCAGGTGGCTTGATAAGT  
TCGGCGTGAAATTTCCCGGCTTAACCGGGGGATGTCGTGCGGAGACTGTCGAGCTAGAGGG  
TGATAGAGGCGTGTGGAATTCGGGGTGTAGTGGTGAATGCGTAGAGATCCGGAGGAACA  
CCAGTGGCGAAGGCGACACGCTGGGTACATACCTGACACTAAAACGCGACAGCATGGGGAG  
CGAACGGGATTAGATACCCGAGTAGTCC

>Otu21990

CAGCCTATGGGGGGCAGCAGCAACGAATCTTCCGCAATGGGCGAAAGCCTGACGGAGCGA  
CGCCGCGTGTGGGACGAAGTCCTTCGGGATGTAAACCACTGTTAGGGTTATGAAAGCAAA  
AGGGTCTAATACATCCTTAGTTGATCTAGCCCAAAGAAAGGGACGGCTAACTCTGTGCCA  
GCAGCCGCGGTAAATACAGAGGTCCCAAGCGTTACTGAGAATCACTGGGTTTAAAGGGTGC  
GTAGGTGGTCCGTTAAGTCTGTTGTGAAATCCCTCGGCTCAACCGGGGAATTGCTTCGGA  
TACTGGCGGACTTGAGGCCGTATAGGTCACTGGAAGTACGGTGGAGCGGTGAAATGCA  
TAGATATCGTCAGGAACGCCGGTGGTGAAGACGGGTGACTGGGCCGGAAGTACACTGAG  
GCACGAAAGCGTGGGGATCGAACGGGATTAGATACCCTCGTAGTCC

>Otu21992

CCAGCCTATGGGAGGCAGCAGTCGAGAATTTTTTACAATGGGCGAAAGCCTGATGGAGCG  
ACGCCGCGTGGGGGATGAATGGCTTCGGCCCGTAAACCCCTGTCATTTGCGATCAAACGT  
TGGTATTTTAAAAGATGCCAGCCTGATAGTAGCGGAAGAGGAAGGGACGGCTAACTCTGTG  
CCAGCAGCCGCGGTAATACAGAGGTCCCAAGCGTTGTTTCGGATTCACTGGGCGTAAAGGG  
TGCGTAGGTGGTCGGGTAAGTCGGATGTGAAAGCTCGGAGCTCAACTCCGAAATGGCATT  
GGAAACTACCTGACTCGAGGAATGGAGGGGAGACTGGAATACTTGGTGTAGCAGTGAAAT  
GCGTAGATATCAAGTGGAACACCAGTGGCGAAGGCGAGTCTCTGGACATTTCTGACACT  
GAGGCACGAAAGCTAGGGGAGCAAACAGGATTAGATACCCTAGTAGTCC

>Otu21994

CAGCCTACGGGGGGCAGCAGTCGAGAATTTTTTCTCAATGGGCGAAACCCCTGATGGAGCGA  
CGCCGCGTGGAGGATGAAGGTCTTCGGATCGTAAACTCCTGTCACTGCAGAAAAATAGTG  
CCGACCTAATACGTCGTCATTTGATTGTATGCGGAGAGGAAGGGACGGCTAACTCTGTGC  
CAGCAGCCGCGGTAATACAGAGGTCCCGAGCGTTGTTTCGGATTCACTGGGCGTAAAGGGT  
GTGTAGGAGGTGAGCTAAGTCAGGTGTGAAATCCTGCCGCTCAACGGCAGAACTGCACTT  
GATACTGGTTGGCTAGAGGACTGGAGAGGAGATCGGAATTCTCGGTGTAGCAGTGAAATG  
CGTAGATATCGAGAGGAACACCGGTGGCGAAGGCGGATCTCTGGAAAGTTCCTGACTCTG  
AAACACGAAAGCTAGGGTAGCAAACGGGATTAGAAACCCCGGTAGTCC

>Otu21995

CCAGCCTACGGGGGGCACCAGTGGGGAATATTGGGCAATGGGCGCAAGCCTGACCCAGCA  
ATGCCGCGTGTGTGAAGAAGGCCTGCGGGTTGTAAAGCACTTTGGGCGGGGAGGAAGGGG  
CGCGGGCTAACACCCTGCGCCATTGACGCCACCCGCGAGAACAAGCACCGGCTAACTCCGT  
GCCAGCAGCCGCGGTAATACGGAGGGTGCAGCGTTAATCGGAATTACTGGGCGTAAAGC  
GTGCGTAGGCGGCCCGGTGAGTCTCGCGTGAAAGCCCCGGGCTCAACCTGGGAAGTGCAGC  
GGGAAACTGCCGGGCTGGAGTGCGGGAGAGGGCGGTGGAATTTCCGGTGTAGCAGTGAAA  
TGCGTAGAGATCGGAAGGAACACCAGTGGCGAAGGTGGCCGCCTGGACCGACACTGACGC  
TGAGGCACGAAAGCGTGGGGAGCAAACAGGATTAGAAACCCCGGTAGTCC

>Otu22006

CCAGCCTATGGGGGGCACCAGTGGGGAATTTTGGACAATGGGGGCAACCCTGATCCAGCA  
ATGCCGCGTGTGTGAAGAAGGCCTTCGGGTGTAAAGCTCTTTTGTGAGGGAAGAAACGG  
GTGTCTCTAATATAGATATCTAATGACGGTACCTGAAGAATAAGCACCGGCTAACTACGT  
GCCAGCAGCCGCGGTAATACGTAGGGTGCAAGCGTTAATCGGAATTACTGGGCGTAAAGC  
GTGCGCAGGCGGTTATGTAAAGTCAGATGTGAAATCCCCGGGCTTAACCTGGGAATGGCAT  
TTGAGACTGCATGGCTAGAGTGTGTGAGAGGGGGGGTAGAATTCCCGGTGTAGCAGTGAA  
ATGCGTAGAGATCAGGAGGAATACCAATGGCGTAGGCAGCCCCCTGGGACAAAAGTACG  
CTCATGTACGAAAGCGTGGGAAGCAAACAGGATTAGAAACCCTAGTAGTCC

>Otu22023

CCAGCCTACGGGGTGCAGCAGTAAGGGATATTGCACAATGGGCGAAAGCCTGATGCAGCA  
ACGCCGCGTGGAGGATGAAGGCCTTCGGGTGTAAAGCTCTTTTGTGAGGAGCAAG  
GACGGTAGGCGTCGAATAAGTCACGGCTAACTACGTGCCAGCAGCCGCGGTAAAACGTAG  
GTGGCAAGCGTTATCCGGATTACTGGGCGTAAAGGGTGTGACGGCGGGGCCACAAGTGG  
TGTATGAAAGCCTCCAGCTAAACTGGGGTAGGTTATGCCAGACTGTGGTTCTAGAGTGCG  
AGAGAGGGGCGTGGAAATTCGGGTGTAGTGGTGAATGCGTAGAGATCCGGAGGAACCC  
AGAGGCGAAGGCGGCCCTGGCTCGCAACTGACGCTGAGGCACGAAAGCTAGGGGAGCA  
AACAGGATTAGAGACCCGCGTAGTCC

>Otu22024

CCAGCCTATGGGGCGCTCCAGTGGGGAATCTTGCGCAATGGGCGAAAGCCTGACGCAGCG  
ACGCCGCGTGGGTGATGAAGGCCTTCGGGTGTAAAGCCCTGTGGGGGGAGACGAATAAG  
GCCTGGTCAATAGCCAGGTTGATGACGGTATCCCTTAGCAAGCACCGGCTAACTCTGTG  
CCAGCAGCCGCGGTAAGACAGAGGGTGCAAACGTGTTTCGGAATGACTGGGCGTAAAGCG

CATGTAGGCGGCTCGGCAGGTCGGATGTGAAAGCCCTTGGCTCAACCAAGGAAGTGCATT  
CGAAACCGCCGAGCTAGAGTGCGCGAGAGGAAGGTGGAATTCTCGGTGTAGAGGTGAAAT  
TCGTAGATATCGAGAGGAACACCGGCGGCGAAAGCGGCCCTTCTGGAGAGACACTGACGCT  
GAGATGCGAAAGTGCGGGGAGCAAACAGGATTAGAAACCCCCGTAGTCC

>Otu22032

CCAGCCTACGGGGGGCTGCAGTAGGGAATTTTCCACAATGGGCGAAAGCCTGATGGAGCA  
ACGCCGCGTGCAGGATGAATGTCTTCGGATTGTAAACTGCTTTTATATGTGACGATTATG  
ACGGTAGCATATGAATAAGGATCGGCTAACTCCGTGCCAGCAGCCGCGGTCATACGGAGG  
ATCCAAGCGTTATCCGGAATTACTGGGCGTAAAGAGTTGCGTAGGTGGCAGAGTAAGCGG  
ACAGTGAAAGCGTACGGCTCAACCGTATACACATTGTCTGAACTGCTCAGCTAGAGGACG  
AGAGAGGTACCTGGAATTCCCAGTGTAGGAGTGAAATCCGTAGATATTGGGAGGAACACC  
GATGGCGTAGGCAGGGTACTGGCTCGTTCTTGACACTAAGGCACGAAAGCGTGGGGAGCA  
ACCCGGATTAGAAACCCCGGTAGTCC

>Otu22036

CCAGCCTATGGGGGGCTGCAGTCGAGAATCTTCGGCAATGGGCGAAAGCCTGACCGAGCG  
ACGCCGCGTGGAGGATGAAGGCCCTTCGGGTGTAAACTCCTGTTGGGGGGGAACAAATCA  
ATGAGTGACCCCCCTGAGGAAGCACGGGCTAAGTTCGTGCCAGCAGCCGCGGTAAGACGAA  
CCGTGCGAACGTTATTTCGGAATCATTGGGCTTAAAGAGCGCGTAGGCGGCGGCGTAAGTT  
GGAAGTGAAATCCCATCGGCTCAACCGTGGAATCGCTCCAGTACTGCGTCGCTCGAGGG  
AGATAGGGGCTGTGGAAGTCCCGGTGGAGCGGTGAAATGTGTTGATATCGGCGGGAACG  
CCAGTGGCGAAAGCGACAGGCTGGACCTTTTCTGACGCTGAGGCGCGAAAGCTAGGGGAG  
CAAACGGGATTAGAAACCCGCGTAGTCC

>Otu22039

CCAGCCTATGGGAGGCTGCAGTGGGGAATTTTGGACAATGGGCGCAAGCCTGATCCAGCC  
ATGCCGCGTGAGTGAAGAAGGCCCTTCGGGTGTAAAGCTCTTTCAGCCGGAAGAAAACG  
CACGGGTAAATACCTTGTGTGGATGACGGTACCGGAAGAAGAAGCACCCGGCTAACTACGT  
GCCAGCAGCCGCGGTAATACGTAGGGTGCAGCGTTAATCGGAATTACTGGGCGTAAAGC  
GTGCGCAGGCGGTTTTGTAAAGACAGATGTGAAATCCCCGGGCTTAACCTGGGAAGTGCAT  
TTGTGACTGCAAGACTAGAGTGCGGCAGAGGGGGGTAGAATTCACGTGTAGCAGTGAAA  
TGCGTAGATATGTGGAGGAATACCGATGGCGAAGGCGGCCAACTGGACGAACACTGACGC  
TGAGACACGAAAGCGTGGGGAGCAAACAGGATTAGAAACCCCGGTAGTCC

>Otu22044

CCAGCCTATGGGAGGCAGCAGTGGGGAATATTGGACAATGGGCGAAAGCCTGACCCAGCG  
ACGTGCGGTGGGCGATGAAGGCCCTTCGGGTGTAAAGCCCTGTTGGGTGGAAAGAAGGGT  
CCAGAGACGAATAATCTTTGGACTTTGACGGTACCACCAGAGGAAGCACCCGGCTAACTCC  
GTGCCAGCAGCCGCGGTAATACGGAGGGTGCAAGCGTTGTTTCGGAATTACTGGGCGTAAA  
GGGCGCGTAGGTGGTTGTGTAAGTCGGATGTGAAATCCCCAGGCTCAACTTGGGAACCGC  
ATCTGATACTGCATGACTAGAGTACTGCAGAGGGAAACGGAATTCCTGGTGTAGAGGTGA  
AATTCGTAGATATCAGGAGGAACACCGGTGGCGAAGGCGGTTTCCTGGACCGTAACCGAC  
GCTGAGGCGCGAAAGCTAGGGGAGCAAACAGGATTAGAAACCCCGGTAGTCC

>Otu22047

CCAGCCTACGGGTTGCAGCAGCCAAGAATCTTCCGCAATGGGGGAAACCCTGACGGAGCG  
ACGCCGCGTGGATGATGAAGGCCGTAAAGTTGTAAATCCTTTTGTCTGGTGAAGAATAAA  
TCAGGGAGTGAAAGCCCTGGTGATGACGTTAGCCGACGAATAAGCCCCGGCTAATTACG  
TGCCAGCAGCCGCGGTAATACGAAGGGGGCTAGCATTGTTTCGGAATTACTGGGCGTAAAG  
CGCGTGTAGGCGGGCTTTTAAGTCAGGGGTGAAATGCCAAGGCTCAACCTTGGAACTGCC  
TTTGATACTGGAAGTCTTGAGTCCGGGAGAGGTGAGTGGAAGTGCAGAGTGTAGAGGTGAA  
ATTCGTAGATATTCGCAAGAACACCAAGTGGCGAAGGCGGCTCACTGGCCCCGGAAGTACG  
CTGAGACGCGAAAGCGTGGGGAGCAAACAGGATTAGAAACCCCTTGTAGTCC

>Otu22068

CCAGCCTATGGGTTGCTGCAGTGGGGAATATTGGACAATGGGCGCAAGCCTGATCCAGCC  
ATGCCGCGTGAGTGACGAAGGTCTTCGGATTGTAAAGCTCTTTCGGCGGGGAAGAAATTG  
CTTGGGTAAATACCCTGAGTAGATGACGGTACCCGAACAAGAAGCACCCGGCTAACTACGT  
GCCAGCAGCCGCGGTAATACGTAGGGTGCAGTGTAAATCGGAATTACTGGGCGTAAAGC  
GTGCGCAGGCGGTTTTGGTAAGTCAGATGTGAAATCCCCGGGCTCAACCTGGGAACGGCAT  
TTGAGACTGCCAGGCTGGAGTTTGGCAGAGGGGGGTGGAATTCACGTGTAGCAGTGAAA  
TGCGTAGATATGTGGAGGAACACCGATGGCGAAGGCAGCCCCCTGGGCCAATACTGACGC  
TCATGCACGAAAGCGTGGGGAGCAAACAGGATTAGATACCCCTGTAGTCC



>Otu22072

CCAGCCTATGGGGGGCACCAGTGGGGAATCTTGCGCAATGGGGGAAACCCCGACGCAGCA  
ACGCCGCGTGGGTGATGAAGGCCTTCGGGTCGTAAAGCCCTGTCAGGTGGGAAGAAACAT  
GTTGATGCCAATACCATCAACACTTGACGGTACCACCGGAGGAAGCACCGGCTAACTCCG  
TGCCAGCAGCCGCGGTAATACGGAGGGTGCAAGCGTTGTTCCGAATTATTGGGCGTAAAG  
CGCGTGTAGGCGGTTTTTTAAGTCTGATGTGAAAGCCCTGGGCTCAACCCGGAAGTGCA  
TTGGAACTGGGAGACTTGAATACGGGAGAGGGTAGTGGAATTCCTGGTGTAGGAGTGAA  
ATCCGTAGATATCAGGAGGAACACCGGTGGCGAAGGCGGCTACCTGGACCGATATTGACG  
CTGAGACGCGAAAGCGTGGGGAGCAAACAGGATTAGATAACCCAGTAGTCC

>Otu22076

CCAGCCTATGGGATGCAGCAGCGAGGAATATTGCGCAATGGCCGAAAGGCTGACGCAGCG  
ACGCCGCGTGGAGGATGAAGTCCGTTAGGATGTAAACTCCTTTTGCAGGGGATGAATGTC  
CCGTTTCACGGGATTGACCGTACCCTGCGAATAAGGATCGGCTAACTACGTGCCAGCAGC  
CGCGGTAATACGTAGGATCCGAGCGTTGTCCGGATTTACTGGGTGTAAAGGGCGTGTAGG  
TGGATTTCTAAGTCGGTGGTGAAATCCCGCGGCTTAACCGCGGAATTGCTTCCGAAACTG  
GGAATCTTGAATACGGCAGAGGGAGATGGAATTCATGGTGTAGCGGTGAAATGTGTAGAT  
ATCATGAAGAACACCGGTAGCGAAGGCGGTCTCCTGGCCCGATACTGACGCTCATGTGCG  
AAAGCGTGGGGAGCAAACAGGATTAGAGACCCGCGTAGTCC

>Otu22079

CCAGCCTACGGGGCGCAGCAGTAGGGAATATTGGTAATGTGCGAAAGCGCGAACCAGCAA  
CGCCGCGTGCACGATGAAGGCCTTCGGGTGTAAAGTGCTTTTAGAGAGGAAGAGGAAGG  
ACGGTACCTCTAGAATAAGCCTCGGCTAACTACGTGCCAGCAGCCGCGGTAACACGTAGG  
AGGCGAGCGTTATTCGGATTTACTGGGCGTAAAGCGCGTGCAGGCGGTTCCGTAAGTTGG  
ATGTGAAAGCTCCTGGCTTAACTAGGAGAGGTCGTTCAATACTACCGGACTTGAGAGTGG  
TAGAGGGAGATGGAATTCGGGTGTAGTGGTGAAATGCGTAGATATCCGGAGGAACACCA  
GTGGCGAAAGCGATCTCCTAGACCATTCTGACGCTCATACGCGAAAGCTAGGGTAGCAA  
ACGGGATTAGAAACCCCTGTAGTCC

>Otu22081

CCAGCCTACGGGTCGCAGCAGTAAGGAATATTGGTCAATGGACGCAAGTCTGAACCAGCC  
ATGCCGCGTGCAGGATGACAGCCCTACGGGTGTAAACTGCTTTTGTACGGGAAAAAACC  
TTCGGTCGTGAACCGGAGCTGATGGTACCGTAAGAATAAGCATCGGCTAACTCCGTGCCA  
GCAGCCGCGGTAATACGGAGGATGCAAGCGTTATCCGGATTCAATTGGGTTTAAAGGGTGC  
GTAGGCGGACAAATAAGTCAGTGGTGAAACCTGCAGCTTAACTGTAGACTTGCCATTGA  
TACTGTTAGTCTTGAGGGTGGTCAAGGTAGGCGGAATGTGTAATGTAGCGGTGAAATGCT  
TAGATATTACACAGAACACCGATTGCGAAGGCAGCTTACTGGGCCATTACTGACGCTGAT  
GCACGAAAGCGTGGGGAGCGAACAGGATTAGAAACCCTCGTAGTCC

>Otu22104

CCAGCCTATGGGGTGCAGCAGTAGGGAATTTTGACAATGGGGGAAACCCTGATCCAGCC  
ATGCCGCGTGAGTGATGAAGGCCTTCGGGTGTAAAGCTCTGTTAGTTGGGAAGAAAAACA  
ATGACGGTACCAACAAAGAAAGCACCGGCTAACTCTGTGCCAGCAGCCGCGGTAATACAG  
AGGGTGCAAGCGTTAATCGGATTTACTGGGCGTAAAGGGCACGTAGGTGGTTTTTTAAGT  
CTGTGCATGAAATCCCCGGGCTCAACCTGGGAACTGTGACAGAACTAGAAAGCTAGAGTA  
TGGGAGAGGAGAGTAGAATTTCTGGTGTAGCGGTGAAATGCGTAGATATCAGGAAGAATG  
ACAGTGGCGAAGGCGACTCTCTGGCTTAATACTGACACTGAGGTGCGAAAGCGTGGGGAG  
CAAAAGGGATTAGAAACCCTGTAGTCC

>Otu22124

CCAGCCTATGGGATGCTCCAGCCGCAAACAGGGAGTCTGGGTGGCGAGATCTTCCACGAC  
ACGCGCCGTTCCATCGCGCGATCCATCGTCGACCACAATCAGTTCGAGGAACGAAAAATT  
CCCGTGC GCGAGCCAGTCCAGCACGCGCCGAGGGTCTGTGGCAACCGGCTTTCTTCGTT  
GTAAGCGGGGATAACGATGGAGAGCGAGTCCAATGGTCAATTATACTTGTGGCACGAACA  
CATGTCTCTCGAAGAAGGGTGTACGACCAACGCATTTCAGCGCATTGCCGAGATCGAAGC  
TCTCGGGTTTTTACCCTACGGGCACCGTTTCGATTTACGCATACTATCCAGACGTCTT  
AGACGAATATCGCGATAAACCCGCTGAACAATTAGAAACCCCGTAGTCC

>Otu22130

CCAGCCTACGGGGCGCACCAGCACCAGGATGCAAATTGCAATTGGCAAATGTCAATCGCG  
CCAATTTGCACCAGACCGGCTTCGACCAGACGGTGACAACTAATCTAACCTTGTAATG  
GATCTATTTTTTGTTTTTTATCCCAGCACACACACTTGTTCAGTACACAAACAGACCATT  
ATGGTTGTAAGACTGAGAGAGTAATTTAAATGAAGTGACATGAATGTAATCTAATGCCG

AGCAGTATGTGCGATAGTACGGGTACTGCACAAGATGCACTCTCATTACGGCCAGTCAGT  
CGGTTATCAGCACTCTTATTTGTCATATATAGCAATCCATAGATAGGTAATCGATAGTGCC  
AGAGTACGTCAGAGTGGCGATATCGTGCACACCGAGAGATTAGAAACCCGCGTAGTCC

>Otu22144

CCAGCCTACGGGGTGCACCAGTGTAGAATATTGGACAACGTGCGGAAGCGTGATCCAGTG  
ATATTTTCGTAAAGTGATTAAAGACAGTATTACCACTGTAAAACCTTTTACGTAGGGAGAAT  
AATGATAGTACCTAAAGAATAAGCACTGACTAATTCTGTGCCAGCAGTCGCGGTAATACA  
GAAAGTGCAAACATTATTTATCTTAACCTGGGTGTAAAGCATATGTAGGTATTTTCTATCG  
ATTTTTCCTAAAACTTTAATAAAAATTTAGAGCAGGGAATTATTAAGAGAGAATTTGAG  
TCCAAGATAAGTTTATAGATAATTCTATGTGTAAGAGTAAAATCTTTATAAATATGGAGGAA  
TATCAAATTAACGGCGAAAGCTTTTTTCTGTTCTGGAAGTACGCTGAGATATGAAGGTCT  
GGGGATCAAACAGGATTAGAAACCCCAGTAGTCC

>Otu22147

CCAGCCTATGGGTGGCAGCAGTCGAGAATATTTGGCAATGGGCGAAAGCCTGACCATGCG  
ACGCCGCGTGCTGGATGAAGTCCTTCGGGACGTAAACAGCTTTTACGCGTGAAGAAGTAA  
TTGACATTAGCGCGCAATAAGGTGCTCCTAACTCTGTGCCAGCAGGAGCGGTAATACAG  
AGGCCCCAAGCATTATCCGGAATCACTGGGCGTAAAGGGTGTGCAGGCGGCACTGCTAGT  
CTTTTGTAAAGTTCTCTGGCTTAACCGGAGAAATGCAGGAGAAACGGCAGAGCTCGAGG  
ACGCGAGAGGTAGAGGGAACCTCATGGTGTAGGGGTGAAATCCGTTGATATCATGGGGAAC  
ACCAAATGCGAAGGCACTCTACTGGCGCGCTCCTGACGCTCAAACACGAAAGCCAGGGGA  
GCAAACGGGATTAGAGACCCCCGTAGTCC

>Otu22191

CCAACCTACGGGGTGCAGCAGTGGGGAATATTGGACAATGGGGGCAACCCTGATCCAGCG  
ACGCCGCGTGCTGTGAAGAAGGCCTTCGGGTGTAAAACCTCTTTCGACGGGGACGATAATG  
ACGGTACCCGTAGAAGAAGCTCCGACTAACTTCGTGCCAGCAGCCGCGGTAATACGAAGG  
GGGCTAGCGTTGTTTCGGAATTACTGGGCGTAAAGCGTGCGTAGACGGTTTCGTAAGTCGG  
GTGTGAAAGCCCCGGGCTCAACCTGGGAATTGCATTTCGAGACTGCGAGGCTAGGGTGCGG  
AAGAGGGAAGCGGAATTTCCGGTGTAGCGGTGAAATGCGTAGATATCGGAAGGAACATCA  
GTGGCGAAGGCGGCTTCCTGGTCCAGCACCGACGTTTCAGGCACAAAAGCGTGGGGAGCAA  
ACAGGATTAGAGACCCCTGTAGTCC

>Otu22199

CCAGCCTATGGGGTGCACCAGTGGGGAATATTGGACAATGGGGGCAACCCTGATCCAGCC  
ATGCCGCGTGAAATGATGAAGGCCTTCGGGTGTAAAGTTCTTTTGGCGGGGACGATGATG  
ACGGTACCCGCGAGAATAAGCACCGGCTAACTTCGCGCCAGCAGCCGCGGTAATACGAAGG  
GTGCTAGCGTTGTTTCGGAATTACTGGGCGTAAAGGGCGCGTAGGCGGCTTGATAAGTTGG  
GTGTGAAATCCCCGGGCTCAACCCGGGAACGCAACCCAAAACCTATCTCGCTTGAATTCGG  
TAGAGGTTGGTGGAATTTCCAGTGTAGAGGTGAAATTCGTAGATATTGGGAAGAATATCC  
GTGGCGAAGGCGGCCAACTGGACCGACATTGACGCTGAGGCGCGAAAGCGTGGGGATCAA  
ACAGGATTAGATACCCGGGTAGTCC

>Otu22200

CCAGCCTACGGGATGCACCAGTGAGGAATATTGCGCAATGGACGAAAGTCTGACGCAGCC  
ATGCCGCGTGCAAGGATGACGGCCCTATGGGTGTAAACTGCTTTTGTATAGGAAGAACT  
TTTGAACGTGTTTCAAGATTGACGGTACTGTGTGAATAAGCATCGGCTAACTCCGTGCCAG  
CAGCCGCGGTAATACGGAGGATGCAAGCGTTATCCGGATTTATTGGGTTTAAAGGGTGCG  
TAGGCGGGGAAATAAGTCAGTGGTGAAATCCTGCAGCTTAACTGTAGAATTGCCATTGAT  
ACTGTTTTTCTTGAGTGCGGTTGAGGTAGGCGGAATGTGTAATGTAGCGGTGAAATGCTT  
AGATATTACACAGAACACCAATTGCGTAGGCAGCTTACTAAGCCGTAAGTACGCTGAGG  
CACGAAAGCGTGGGGATCGAACAGGATTAGATACCCGCGTAGTCC

>Otu22223

CCAGCCTACGGGAGGCTCCAGTGAGGAATTTTCGTCAATGGGGGCAACCCTGAACGAGCA  
ACGCCGCGTGCAAGGATGAAGGTTTTCGGATCGTAAACTGCTTTTCTCTGGGACGAGAACG  
GACGGTACCAGAGGAATCAGCCCCGGCTAACTACGTGCCAGCAGCCGCGGTAATACGTAG  
GGGGCAAGCGTTGTCCGATTATTGGGCGTAAAGCGCACGCAGGCGGTCAGATCAGTCT  
GGGGTGACAGTCGTCCGCTCAACCGACGAAGTACTTCGGTACTGTCTGACTTGAGGGCT  
TCAGAGGGACACGGAATTTCCGGGTGGAGTGGTGAAATGCGTAGATATCCGGAGGAACACC  
AGTGGCGAAAGCGGCCTCCTGGACCATTTCTGACGCTCAGACGCGAAAGCTAGGGTAGTA  
AACGGGATTAGAAACCCCTAGTAGTCC

>Otu22268

CCAGCCTACGGGTGGCACCAGTGAGGAATTTTCGTCAATGGGGGAAACCCTGAACGAGCA  
ACGCCGCGTGCAGGAAGAAGGTTTTCGGATTGTAACTGCTTTTCTTGGGGAAGAGAACG  
GACGGTACCCAAGGAAGAAGCCCCGGCTAACTACGTGCCAGCAGCCGCGTAATACGAAG  
GGGGCTAGCGTTGTTTCGGAATCACTGGGCGTAAAGCGCACGCAGGCGGATTGATAAGTCA  
GGGGTCAAATCCCGGGGCTCAACCTCGGAATTGCCTTTGATACTGTCTATCTTCGAGTTC  
GGGAGAGGTTGGCGGAATTCCTAGTGTAGAGGTGAAATTCGTAGATATTAGGAAGAACAC  
CAGTGGCGAAGGCGGCTCACTGGCCCCGATACTGACGCTGAGGCACGAAAGCGTGGGGAGC  
AAACAGGATTAGAGACCCTAGTAGTCC

>Otu22269

CCAGCCTACGGGGGGCAGCAGTTGGGAATCTTGCACAATGGGGGCAACCCTGATGCAGCG  
ACGCCGCGTGGAGGATGACGGGTCTAGGCCGTGTAACTCCTTTTCCCGGGAAGACTTAG  
GACGGTACCCGGGGAATAAGCACCGGCTAACTACGTGCCAGCAGCCGCGTAAGACGTAG  
GGTGCAAGCGTTGTCCGGATTACTGGGCGTAAAGCGCGTGTAGGCGGCTTGTTAAGTGT  
GTGGTCAAACCTCAGGGGCTCAACCCCTGATCTGCTGCGCATACTGGCAAGCTAGAGGGTC  
GCAGAGGCTTGTTGGAATTCCAGGTGTAGCGGTGAAATGCGTTGATATCTGGAGGAACACC  
CATGGCGAAGGCAGCAAGCTGGGCGACTCCTGACGCTGAGACGCGAAAGCGCGGGTAGCA  
AACAGGATTAGAAACCCAGTAGTCC

>Otu22279

CCAGCTTATGGGGGGCTGCAGTCGAGAATATTCGACAATGGACGAAAGTCTGATCGAGCG  
ACGCCGCGTGCAGGATGAAGGCCTTCGGGTCGTAACTGCGGTAGTATGGTAACAATGTA  
AATGAGTGCCATACGGAAAGAGGTGGGTAACCTACGTGCCAGCACCAGCGGTAACACGTAG  
ACCTCGAGCGTTATCCGGATTATTGGGCGTAAAGCGCACGTAGGAGGTTTTGTGCGTCT  
TCTGTTAAATACCACCGCCTAACGGTGGAAACCGCAGGAGATACGACAGAACTAGAGGAGG  
TTAGAGGTGCATGGAACCTACGGTGTAGGGGTGAAATCCGTTGATATCTGTTGGGGAACACC  
AAAGGCGAAGGCAGTGCCTGGGACCTTCTGACTCTGAGTTGCGAAAGCGTGGGGAGCA  
AAAAGGATTAGAAACCCCTCGTAGTCC

>Otu22294

GCCAGCCTACGGGGGGCACCAGTGAGGAATTTTGCGCAATGGCCGAAAGGCTGACGCAGC  
AACGCTGCGTGGGTGAAGAAGGCCTTCGGGTCGTAAAGCCCTGTCAGGTGGGAAGAATGG  
CCGGGGGACTAATAATCTTCCGGATTGACGGTACCACCGAAGGAAGCACCGGCTAACTCC  
GTGCCAGCAGCCGCGGTAATACGGAGGGTGCGAGCGTTGTTCCGAGTTATTGGGCGTAAA  
GCGCGTGTAGGCGTTTTTTTAAGTCTGATGTGAAAGCCCTGGGCTCAACCCGGGAAGTGC  
ATTGGAACCTGGGAGACTTGAATACGGGAGAGGGTAGTGGAATTCCTGGTGTAGGAGTGA  
AATCCGTAGATATCAGGAGGAACACCGGTGGCGAAGGCGGCTACCTGGACCGATATTGAC  
GCTGAGACGCGAAAGCGTGGGGAGCAAACAGGATTAGATACCCTTGTAGTCC

>Otu22316

CCAGCCTACGGGTCGCAGCAGTAAGGAATATTGGGCAATGGGCGAAAGCCTGACCCAGCA  
ACGCCGCGTGCACGATGAAGGTCTTCGGATCGTAAAGTGCTTTTCTGAGAGATGAGAAAG  
GACAGTATCTCAGGAATAAGTCTCGGCTAACTTCGTGCCAGCAGCCGCGTAATACGAAG  
GATGCAAGCGTTATCCGGATTATTGGGTTTAAAGGGAGCGTAGGCGGTTTTATAAGTCA  
GTGGTCAAATCTCGTTGCTTAACAACGAACGTGCCATTGATACTGTAGAAGTTGAGTACA  
GATGATGTTGGCGGAATGTGTATGTAGCGGTGAAATGCTTAGATATGACACAGAACACC  
GATTGCGAAGGCAGCTGACAAAAGTGAACCTGACGCTGAGGCTCGAAAGCGTGGGGATCA  
AACAGGATTAGAAACCCTAGTAGTCC

>Otu22324

CCAGCCTACGGGGGGCTGCAGGCGCGAAAACCTTTACAATGCGGGAAACCGTGATAAGGGA  
ACTCCGAGTGCCCGTAAATCGGGCTGTCCATCTGTTTAAATAACTGGTGAAGAAAGGGC  
CGGGCAAGACCGGTGCCAGCCCGCGGTAATACTGGCGGCTCGAGTGGTGGCCACTATT  
ACTGGGCTTAAAGCGTTCGTAGCTGGTTTGTAAAGTCTCTGGGGAAATCTTCCGGCTTAA  
CCGGAAGGCGTCTCAGGGATACTGGCAGACTAGGGACCGAGAGAGGCAGACGGTATTTC  
GGGGTAGGGGTGAAATCCTATAATCCCGGGAAGACCACCAAGTGGCGAAGGCTGTCTGCTA  
GAACGCGCCCGACGGTGAGGGATGAAAGCTGGGGGAGCGAACCGGATTAGATACCCTCGT  
AGTCC

>Otu22333

CCAGCCTATGGGTTGCACCAGTGAGGAATATTGGTCAATAGGGGCAACCCTGAACCAGCC  
ATGCCGCGTGAAGGAAGAATGCCCTAAGGGTTGTAACTTCTTTTGTATGGGAGTAAAGG  
CAGGTACGTGTACCTGTAAGAAAGTACTGTACGAATAAGCATCGGCTAACTCCGTGCCAG  
CAGCCGCGGTAATACGGAGGATGCGAGCGTTATCCGGATTATTGGGTTTAAAGGGTGCG

TAGGCGGGTTTGTAAAGTCAGCGGTGAAAGACTGTCGCTTAACGATAGCATTGCCATTGAT  
ACTGCAGATCTTGAGTACAGTCAAGGTAGGCGGAATGTGTAATGTAGCGGTGAAATGCTT  
AGATATTACACAGAACACCGATTGCGAAGGCAGCTTACTGGGCCATTACTGACGCTGATG  
CACGAAAGCGTGGGGGGCGAACAGGATTAGATACCCCAGTAGTCC

>Otu22339

CCAGCCTATGGGGGGCTCCAGTGGGGAATATTGGACAATGGGCGCAAGCCTGATCCAGCC  
ATGCCGCGTGAGTGAAGAAGGCCTTAGGGTTGTAAAGCCCTGTTGGGTGGAAAGAAGGGT  
CCGAAGACGAATAATCTTTGGACTTTGACGGTACCACCAGAGGAAGCACCGGCTAACTCC  
GTGCCAGCAGCCGCGGTAATACGGAGGGTGCAAGCGTTGTTTCGGAATTACTGGGCGTAAA  
GGGCGCGTAGGTGGTTGTGTAAGTCGGATGTGAAATCCCCAGGCTCAACTTGGGAACCGC  
ATCTGATACTGCATGACTAGAGTACTGCAGAGGGAAACGGAATTCCTGGTGTAGAGGTGA  
AATTCGTAGATATCAGGAGGAACACCGGTGGCGAAGGCGGTTTCCTGGGCAGATACTGAC  
ACTGAGGCGCGAAAGCGTGGGTAGCAAACAGGATTAGAGACCCTTGTAAGTCC

>Otu22344

CCAGCCTACGGGGTGCTCCAGTGGGGAATCTTGCGCAATGGGCGAAAGCCTGACGCAGCG  
ACGCCGCGTGGGTGATGAAGGCCTTCGGGTGTAAAGCCCTGTGGGAAGAGAAGAATAAG  
TCGGAGCGAATACCTCCGGCGATGACGGTATCTTCTTAACAAGCACCGGCTAACTCTGTG  
CCAGCAGCCGCGGTAAGACAGAGGGTGCAAACGTTGTTTCGGAATTACTGGGCGTAAAGCG  
TGTGTAGGCGGCCGCGCAAGTCGGATGTGAAAGCCCCGGGCTCAACCCGGAAGTGCACC  
CGATACTACGTGGCTTGAGTACCGGAGAGGTTGGTGGAAATTCCTCGGTGTAGAGGTGAAAT  
TCGTAGACATCGAGAGGAACACCGGTGGCGAAGGCGGCCAACTGGACGGTAACTGACGCT  
GAGACACGAAAGCGTGGGGAGCAAACAGGATTAGATACCCCTGTAGTCC

>Otu22347

CCAGCCTATGGGGGGCAGCAGTAGGGAATATTGCGCAATGGGCGAAAGCCTGACGCAGCG  
ACGCCGCGTGGAGGATGAAGGTCCTTCGGATTGTAAACTTCTGTTAAGTGGGAAGAAAAA  
GCGTTTTTAATAGAAACGTCCTTATGACGGTACCATTAGAGAAAGCACCGGCTAAACTCGT  
GCCAGCAGCCGCGGTAATACGAGTGGTGCAAGCGTTATTCGGAATCATTGGGCGTACAGG  
GTGTGTAGGCGGCATGTTAAGTTTGTGTAAAGACTTTGGCCTAACCGGAGAAAGGCAG  
CAAAAACCTGGCGTGCTAGAGGGTGAAGAGAGGAGTGAATTCCTCGGTGTAGCGGTAAAA  
TGCGTAGATATCGAGAGGAACACCGATGGCGAAGGCAGCTTCTTGGTCCATTTCTGACGC  
TGATACACGAAAGCGTGGGGAGCAAACAGGATTAGATACCCCAGTAGTCC

>Otu22348

CCAGCCTATGGGGGGCTGCAGTGGGGAATATTGGACAATGGGCGCAAGCCTGATCCAGCC  
ATGCCGCGTGAGTGATGACGGCCTTAGGGTCGTAAAGCTCTTTCAGCGGGGACGATGATG  
ACGGTACCCGCGAGAAGAAGCCCCGGCTAACTACGTGCCAGCAGCCGCGGTAATACGTAGG  
GGGCAAGCGTTGTCCGGATTTACTGGGTGTAAAGGGCGCGTAGGCGGCTATATAAGTCAG  
TGGTGAAATCCTGCGGCTTAACTGCAGAACTGCCATTGATACTGTATAGCTTGAGTACGG  
AAGAGAGAGACGGAATTCAGGTGTAGTGGTGAAATACGTAGATATCTGGAAGAACACCA  
GTTGCGAAGGCGGTCCCTTGGTCCGTTACTGACGCTGAGGCGCGAAAGCGTGGGTAGCAA  
ACAGGATTAGATACCCTAGTAGTCC

>Otu22356

CCAGCCTATGGGGCGCTGCAGTGGGGAATATTGGACAATGGGCGCAAGCCTGATCCAGCC  
ATGCCGCGTGAGTGAAGAAGGTCCTTCGGATTGTAAAGCTCTGTTGAGTGGGAGAAAAGTT  
TCGGGAATAACACCTCGAGACCTGACGGTACCATTGAGGAAGCCCCGGCTAACTACGTG  
CCAGCAGCCGCGGTAATACGTAGGGGGCAAGCGTTGTTTCGGAATCACTGGGCGTAAAGGG  
AGCGTAGGCGGAGGAATAAGTTAGAAGTTTAATGTACGGGCTTAACCCGTAATCTGCTTC  
TAATACTGTTCTTCTTGAGTATGGGAGAGGGAGATGGAATTCAGGTGTAGCGGTGGAAT  
GCGTAGATATCTGGAAGAACACCAGCTGCGAAGGCGGTCTCCTGGCCCAATACTGACGCT  
GAGGCTCGAAAGCTAGGGGAGCAAACAGGATTAGAGACCCCAGTAGTCC

>Otu22363

CCAGCCTACGGGTGGCTGCAGTAACGAATCTTCCGCAATGGGCGCAAGCCTGACGGAGCG  
ACGCCGCGTGAGGACGAAGTCCTTCGGGATGTAAACTACTGTCAGGGGTTAGAATGTTT  
TAATCAACCCAGAGGAAGGCACGGCTAACTCTGTGCCAGCAGCCGCGGTAAGACAGAGG  
CGCCAAGCGTTAGGCGGAATCACTGGGCTTAAAGCGTGTGTAGGCGGGTCTCTAAGTGCC  
TTGTGAAATCCCACGGCTCAACCGTGGAAGTGTGGGCATACTGGAGGTCTTGAGCCACC  
TAGGGGCGAGCGGAACGAATGGTGGAGCGGTGAAATGCGTAGATATCATTCGGAACGCCA  
ACGGTGAAAACAGCTCGCTGGGGGTGTGCTGACGCTGAGACACGAAAGCCAGGGGATCAA  
ACGGGATTAGAAACCCGAGTAGTCC

>Otu22373

CCGCCTATGGGTGGCTGCAGTTTTCGAATCGTTCGCAATGCCCCGAAGGGTGACGACGCGA  
CGCCGCGTGTGGGAGGAAGGCCTTCGGGTTGTAAACCACTTTTAGGGGACATGAAGAGAG  
CGGGGTTAACAGCCCCGTAATCTGACGTCAACCTCAGAAAAAGCTCCGGCTAACTTCGTG  
CCAGCAGCCGCGGTAAGACGAAGGGAGCGAGCGTTGTTTCGATTCACTGGGCTTAAAGGG  
CGCGTAGGCGGCCGTACATGTCGGTTGTGAAATCCCTGGGCTCAACCCAGGAAGTCTTC  
CGAAACGGTACGGCTTGAGGCATTCTGTGGGTGACTGGAACCTTGGTGGAGCGGTGACA  
TGCGTAGATATCAAGAGGAACGCCGGTGGTGAAGACGGGTCCTGGGAATGTTCTGACGC  
TGAGGCGCGAAAAGCTAGGGGAGCGAACGGGATTAGATAACCCGCGTAGTCC

>Otu22386

CCAGCCTATGGGAGGCTCCAGTGGGGAATATTGGACAATGGGCGCAAGCCTGATCCAGCA  
ATGCCGCGTGAGTGATGAAGGCCTTAGGGTCGTAAAGCTCTTTCGGGTGGGACGATGATG  
ACGGTACCACCAGAAGAAGCCCCGGCTAACTTCGTGCCAGCAGCCGCGGTAATACGAAGG  
GGGCTAGCGTTGTTTCGGAATTACTGGGCGTAAAGCGCACGCAGGCGGTCCGTTGAATTAG  
GAGTGAAAGCCCTGGGCTCAACCTGGGAATTGCTTTTAAAGACTGGCGGACTTGAATTCAG  
AAGAGGGTAGTGGAATTCCTAGTGTAGAGGTGAAATTCGTAGATATTGGGAAGAACACCG  
GTGGCGAAGGCGGCGACCTGGTCCGAGACTGACGCTGAGGCGCGAAAGCGTGGGGAGCAA  
ACAGGATTAGATAACCTCTAGTCC

>Otu22397

CCAGCCTATGGGGGGCAGCAGTGGGGAATTTTTCGCAATGGGGGAAACCTGACGCAGCA  
ACGCCGCGTGAGGATGAATGTCTTCGATTGTAAACTGCTTTTATATGTGACGATAATG  
ACGGTAGCATATGAATAAGGATCGGCTAACTCCGTGCCAGCAGCCGCGGTACATACGGAGG  
ATCCAAGCGTTATCCGGAATTACTGGGCGTAAAGAGTTGCGTAGGTGGCAGAGTAAGTTA  
GTAGTGAAAGCGTTCGGCTCAACCGGATATCCATTACTAAAAGTCTCAGCTAGAGGACG  
AGAGAGGTAATTGGAATTCCTAGTGTAGGGGTAAAATCCGTTGATATTAGGAGGAACACC  
GATGGCGTAGGCAGATTACTGGCTCGTTCCTGACACTAAGGCACGAAAGCGTGGGTAGCA  
AACAGGATTAGAGACCCTAGTAGTCC

>Otu22413

CCAGCCTACGGGACGCTGCAGTGGGGAATCTTTCGCAATGGGCGAAAGCCTGACGCAGCA  
ACGCCGCGTGAGGGACGAAGGCCTTCTGAGTTGTAAACCTCTTTCAGCAGGGACGATAGT  
GACGGTACCTTCAGAAGAAGCCCCGGCTAACTACGTGCCAGCAGCCGCGGTAATACGTAG  
GGGGCAAGCGTTGTCCGGAATCATTGGGCGTAAAGCGCGTGTAGGCGGCTTGATAAGTCT  
GCTGTGAAAGTCCAGGGCTCAACCCCTGGAATGCCGGTGGAAGTGTCAAGCTAGAGTCCG  
GAAGAGGCGAGTGGAATTCCTGGTGTAGCGGTGAAATGCGCAGATATCAGGAGGAACACC  
AATGGCGAAGGCAGCTCGCTGGGACGGTACTGACGCTGAGACGCGAAAGCGTGGGGAGCA  
AACAGGATTAGAAACCCCTGTAGTCC

>Otu22449

CCAGCTTACGGGGGGCAGCAGTGGGGAATTTTTCGCAATGGGGGAAACCTGACGCAGCA  
ACGCCGCGTGAGGATGAAATCCCTTGGGATGTAAACTTCTTTTATTTGGGAAGAAATCC  
ATTTTTTTCTAAGGTGGTTGACGGTACCAGATGAATAAGCACCGGCTAACTCCGTGCCAGC  
AGCCGCGGTAATACGGAGGGTGCAAGCGTTATCCGGATTCACTGGGTTTAAAGGGTGCCT  
AGGCGGGCAGGTAAGTCAGTGGTGAATCTCCGGGCTTAACCCGAAAGTGCCATTGATA  
CTATCTGTCTTGAATGTCTGGAGGTGAGCGGAATATGTCATGTAGCGGTGAAATGCTTA  
GATATGACATAGAACCAATTGCGAAGGCAGCTCACTACACGATGATTGACGCTGAGGC  
ACGAAAGCGTGGGGATCAAACAGGATTAGAAACCCAGTAGTCC

>Otu22455

CCAGCCTATGGGAGGCAGCAGTGGGGAATCTTTCGCAATGGACGAAAGTCTGACGCAGCC  
ACGCCGCGTGAGTGAAGAAGGCCTTCGGGTTGTAAAGCTCTGTTCGAGGGGACAAAAACG  
GTTTAGGTTAATAGCCTAGATCCTTGATGGTACCCTCAAAGGAAGCACCGGCTAACTTCG  
TGCCAGCAGCCGCGGTAATACGAAGGGTGCAAGCGTTGCTCGGAATTATTGGGCGTAAAG  
GGTAGGTAGGTGGTTGCGTTTGTCTGGGGTGAATCCCTGAGCTTAACTCAGGAAGTGCC  
TTGGAACGGCGTAACTAGAGCACTGGAGAGGTTTCGTGGAATTCCTGGTGTAGCGGTGAA  
ATGCGTAGAGATCGGGAGGAACACCAGCGGCGAAGGCGGCGAACTGGACAGTAACCGACA  
CTCAACTACGAAAGCGTGGGGAGCAAACAGGATTAGAGACCCCGGTAGTCC

>Otu22472

CCAGGGGGGGCAGCAGTAAGGAATATTGGTCAATGGGCGGAAGCCTGAACCAGCCATGCC  
GCGTGCAGGAAGACGGCCCTATGGGTTGTAAACTGCTTTTGTACGGGAATAAACCCCTGAT  
ACGAGTATCAGGCTGAATGTACTGTAAGAATAAGGATCGGCTAACTCCGTGCCAGCAGCC

GCGGTAATACGGAGGATCCAAGCGTTATCCGGATTTATTGGGTTTAAAGGGTGCGTAGGT  
GGCCTGTAAAGTCAGGGGTGAAAGACGGTAGCTCAACTATCGCAGTGCCCTTGATACTGA  
TGGGCTTGAATGGACTAGAGGTAGGCGGAATGTGACAAGTAGCGGTGAAATGCATAGATA  
TGTCACAGAACACCGATTGCGAAGGCAGCTTACTATGGTCCGATTGACACTGAGGCACGA  
AAGCGTGGGGATCAAACAGGATTAGATACCCGAGTAGTCC

>Otu22481

CCAGCCTACGGGGTGCACCAGTCGAGAATCTTCCGCAATGGACGAAAGTCTGACGGAGCG  
ACGCCGCGTGATTGATGAAGCACTTCGGTGTGTAAAGATCTTTTATGAGGGAAGAAGTTT  
ATTGACGGTACCTCATGAATAAGGGGCTCCTAATCTCGTGCCAGCAGGAGCGGTAATACG  
AGAGCCCCGAGCGTTATCCGGAATTATTGGGCGTAAAGGGTGCGTAGGTGGTTTTGTAG  
TCGTTTGTCAAATCTTCGGGCTTAACCCGAAATCCGCAAACGAAACGGCATAAATTGAGA  
GTGTGAGAGGTATAGGGAACCTCATGGTATAGGGGTGAAATCCGTTGATATCATGGGGAAC  
ACCAAATGCGAAGGCAGTACACTGGCGCATATTTGACGCTGAAGCTCGAAAGCGTGGGTA  
GCGAATGGGATTAGAAACCCTAGTAGTCC

>Otu22484

CCAGCCTACGGGTTGCAGCAGTCGAGAATTTTTTACAATGGGGGAAACCCTGATGGAGCG  
ACGCCGCGTGAGGATGAAGGCCTTCGGGTCGTAAACTCCTGTCACTACAGAACAAGGGT  
AATACAGCTAACACCTGTGTTATTTGATGGTATGTGGAGAGGAAGGAACGGCTAACTCTG  
CGCCAGCAGCCGCGGTGATACAGAGGTTCCAAGCGTTGTTCCGATTCACTGGGCGTAAAG  
GGTGCGTAGGGGGTCAAGATAGTCGGATGTGAAAGCCTGCAGCTTAACTGCGGAACCTGCA  
CTCGATACTACTTGGCTAGAGGACTGGAGGGGAGAGCGGAATTCTTGGTGTAGCGGTGAA  
ATGCGTAGATATCAAGAGGAACGCCAGTGGCGAAAGCGGCTCTCTAGACAGTTCTCTGACC  
CTGAGGCACGAAGGCTAGGGTAGCAAACGGGATTAGAAACCCCCGTAGTCC

>Otu22503

CCAGCCTACGGGGTGCAGCAGTGGGGAATCTTGCGCAATGGGCGAAAGCCTGACGCAGCA  
ACGCCGCGTGCGGGAAGAAGGCCTTAGGGTTGTAAACCGCTTTCAGTAGGAACGAAAATG  
ACGGTACCTGCAGAAGAAGGTGCGGCCAACTACGTGCCAGCAGCCGCGGTGACACGTAGG  
CACCAAGCGTTGTCCGGATTTATTGGGCGTAAAGAGCTCGTAGGCGGTTGAGTAAGTCGG  
GTGTGAAAACCTCTGGGCTTAACCCAGAGCCGCCACTCGATACTGCTCTGACTTGAGTTCTG  
GTAGGGGAGCAGGGAATTCCCTAGTGTAGCGGTGAAATGCGCAGATATTAGGAGGAACACC  
GGTGGCGAAGGCGCTGCTCTGGGCCGAAACTGACGCTGAGGAGCGAAAGCCAGGGGAGCA  
AACGGGATTAGAAACCCTAGTAGTCC

>Otu22504

CCAGCCTACGGGGCGCTGCAGGCGCGAAAACTCTCCAATGTGCGAAAGCGTGAGAGGGGA  
ACTCCTAGTGCTATGGGTTTATCCCATGGCTTTTGCCAAGTGTAACAGCTTGCGGAATA  
AGTGGTGGGCAAGACTGGTGCCAGCCGCCGCGGTAACACCAGCGCCACGAGTGGCTATCA  
CGATTATTGGGCCTAAAGCGTCCGTAGTCGGTTCTGTGCATCTTCTGTGAAATCGTTGCG  
CTTAACGTAACGGCATGCGGAAGACACGGCAGAACTTGAGAGCGGGAGGCGTGAAGAGTA  
CTCCGGGGGGACCGGTAAAATGGTATAATCCCCGGAAGACTACCTGTGGCGAAGGCGCTT  
CACGAGAACGCATCTGACGATGAGGGACGAAAGCCAGGGGAGCAAACCGGATTAGAAACC  
CCGGTAGTCC

>Otu22511

CCAGCCTACGGGAGGCAGCAGTAGGGAATATTGGACAATGGGCGAGAGCCTGATCCAGCC  
ATGCCGCGTGCGAAGAAGGCGCTCTGCGTTGTAAACTGCTTTTGACTAGGGCCAAAAA  
GCGCATGCGTGCGAAATTGAGAGTACTAGTAGAATAAGCACCGGCTAACTCCGTGCCAGC  
AGCCGCGGTAATACGGAGGGTGCGAGCGTTGTCCGGATTTATTGGGTTTAAAGGGTGCGT  
AGGTGGCCCTATAAGTCAGCGGTGAAAGTCTGCAGCTTAACTGTAGAACTGCCATTGATA  
CTGTAGGGCTTGAGTACTGATGAGGTAGGCGGAATTGATAGTGTAGCGGTGAAATGCATA  
GATATTATCAAGAACACCGATTGCGAAGGCAGCTTACTAAGGAGTTGCTGACACTGAGGC  
ACGAAAGCGTGGGGATCAAACAGGATTAGATACCCTCGTAGTCC

>Otu22546

CCAGCCTATGGGATGCAGCAGTGGGGAATATTGGACAATGGGCGCAAGCCTGATCCAGCG  
ACGCCGCGTGAGGACGAAGGCCTTCGGGTGTAAACTCCTGTGAGGGGGAGGAAGGGG  
CAACCTTGACCGATCCCTGGAGGAAGCACGGGCTAAGTTCGTGCCAGCAGCCGCGGTAAG  
ACGAACCGTGCGAACGTTATTTCGGAATCACTGGGCTTAAAGCGCGTGTTAGGCGGGCGGGC  
ACGTCCGTACCTGAAAGCCCCGGCTCAACCGGGGAAGCGGGGCCGATACGACTCGCCTG  
GAGGGACGTAGGGGGACCTGGAACCTCCGGTGGAGCGGTGAAATGCGTTGAGATCGGAAG  
GAACGCCCGTGGCGAAAGCGAGGTCCTGGACGTCTGCTGACGCTGAGACGCGAAAGCTAG

GGGAGCGAACGGGATTAGAGACCCGTGTAGTCC

>Otu22550

CCAGCCTATGGGTTGCTGCAGTAACGAATCTTCCGCAATGCACGAAAGTGTGACGGGGCA  
ATGCCGCGTGTGGGATGAAGCCCTTCGGGGTGTAAACCACTGTCAAGGTTTACCAACAAC  
ATGAGGAGACCTAAAGGAAGAGCCGGCTAACTCTGTGCCAGCAGCCGCGTAATACAGAG  
GGCTCGAGCGTTAATCGGAATCACTGGGCTTAAAGCGTGCCTAGGCGGATTTGAAGGCGC  
TTTGTGAAATCCCTCGGCTCAACCGAGGAACTGCTTGGCGAACCACAAATCTTGAGGCTG  
GTAGAGGTGGTCGGAACGATAGGTGGAGCGGTGAAATGCGTAGATATCTATCGGAACACC  
GAAGGTGAAGACAGGCCACTGGGCCAGTCTGACGCTGAGGCACGAAAGCGTGGGTAGCA  
AACGGGATTAGATACCCTTGTAGTCC

>Otu22551

CCAGCCTATGGGGTGCTGCAGCAACGAATCTTCCCCAATGCCGGAACGGTGAGGGAGCG  
ACGCCGCGTGAAGGATGAAGTACTTCGGTATGTAACTTCTTTTAGGGTTACGAAAGCAA  
TGCGCGCTAATACCGCGTAAAGTTGATCTAGCCCAGAATAAGGGGCGGCTAACTCTGTGC  
CAGCAGCCGCGTAATACAGAGGCCCAAGCGTTACTGAGAATCACTGGGTTTAAAGGGT  
GCGTAGGTGGTGCGTTAAGTCCGTTGTGAAATCCCCGAGCTCAACTCGGGAACCTGCTTCG  
GATACTGGCGCACTTGAGGCCGGTAGAGGTCACTGGAACAGACGGTGGAGCGGTGAAATG  
CGTAGATATCGTCTGGAACGCCGGTGGTGAAGACGGGTGACTGGGCCGTTCTGACACTG  
AGGCACGAAAGCGTGGGGAGCGAACGGGATTAGAGACCCGAGTAGTCC

>Otu22554

CCAGCCTACGGGTTGCAGCAGTCGAGAATTTTTCTCAATGGGGGAAACCTGAAGGAGCG  
ACGCCGCGTGGAGGATGAAGGTCTTCGGATTGTAACTCCTGTCATTAGGGAACAAACCT  
CCCGGTTAACTGCCGGAGAGCTGATAGTACCTGAAGAGGAAGAGACGGCTAACTCTGTGC  
CGGCAGCCGCGGTAATACAGAGGTCTCAACCGTTGTTTCGGATTTCATTGGGCGTAAAGGGT  
GCGTAGGCGGGCGGAGTAAGTCAGGTGTGAAATCTCGGGGCTCAACCCCGAAACTGCACCT  
GATACTGCTTCGCTAGAGTATTGGAGAGGAGATTGGAATTTACGGTGTAGCAGTGAAATG  
CGTAGATATCGTAAGGAAGACCAGTGGCGAAGGCGAATCTCTGGACAATTACTGACGCTG  
AGACACGAAAGCGTGGGTAGCAAACAGGATTAGATACCCAGTAGTCC

>Otu22562

CCAGCCTACGGGTCGCAGCAGTGGGGAATATTGGACAATGGGCGAAAGCCTGATCGAGCG  
ACGCCGCGTGGAGGATGAAGTGCTTCGGCATGTAACTCCTTTTGCCAGGGAAAAAGTTA  
TTGATGGTACCTGGAGAATAAGAAGTTGCTAACTCGTGCCAGCAGCAGCGGTAATACGA  
GTGCTTCAAGCGTTATCCGGAATCATTGGGCGTAAAGGGTGTGTAGGTGGTTGTATTAGT  
CTCCCGTCAAATCTTTTCGGCTCAACCGAGAGCTCGCGGGGAAACGGTACGACTTCGAGG  
ACGGAAGAGGTCTCTGGAACCTCTAGGTGTAGCGGTGAAATGCGTTGATATCTAGGGGAAC  
ACCAAAGCGAAGGCAAGAGACTGGTCCGCTCCTGACACTGAAACACGAAAGCGTGGGTC  
GCGAATGGGATTAGAAACCCTTGTAGTCC

>Otu22564

CCAGCCTATGGGGTGCTGCAGTGGGGAATCTTGACACAATGGGGGAAACCTGATGCAGCG  
ACGCCGCGTGAGCGATGAAGCCCTTCGGGGTGTAAAGCTCTTTCGTCAGGGAAGATAGTG  
ACGGTACCTGGAGAAGCAGCTGCGGCTAACTACGTGCCAGCAGCCGCGGTAATACGAGGG  
GGGCGAGCGTTGTTTCGGAATTATTGGGCGTAAAGGGTGCCTAGGCGGTTTGTTAAGTCTT  
TTGTGAAATCTACAGGCTCAACTTGTAGACTGCAAGGGGAACTGCCGGGCTTGAGTGTGG  
GAGAGGTGGGTGGAATTCCCGGTGTAGCGGTGAAATGCGTAGATATCCGGAGGAACACCT  
GTGGCGAAAGCGGCTCACTGGACCACAACCTGACGCTGAGGCGCGAAAGCTAGGGGAGCAA  
ACAGGATTAGAAACCCGCGTAGTCC

>Otu22573

CCAGCCTACGGGTCGCTGCAGTGGGGAATATTGGGCAATGGGGGCAACCTGAACGAGCA  
ACGCCGCGTGCAGGAAGAAGGTTTTTCGGATCGTAACTGCTTTTCTCTGGGACGAGTAAG  
GACGGTACCAGAGGAATCAGCCCCGGCTAACTACGTGCCAGCAGCCGCGGTAATACGTAG  
GGGGCAAGCGTTGTCCGATTATTGGGCGTAAAGGGTCCGCAGGCGGTTTGTTAAGTTT  
GACGTGACAGTTCCCGGCTCAACTGGGAAAGTGCCTTGGAACCTGCCAGACTTGAGGGCT  
TCAGAGGGATGCGGAATTCCGGGTGGAGTGGTGAATGCGTAGATATCCGGAGGAACACC  
AAGGGCGAAGGCAGCATCCTGGGAAGTCTCTGACGCTCAGGGACGAAAGCTAGGGGAGCG  
AACGGGATTAGAAACCCTAGTAGTCC

>Otu22581

CCAGCCTACGGGGGGCACCAGTGAGGAATTTTGGACAATGAACGAAAGTTTGATCCAGCA  
ATATCGCGTGAGTGATTTTTTTTATTATGTTGATTTTTTGAAATCGATGTAAAGAAGGTTAA

TTCCGTAAAACTCTTTTCGGTATTGATGAAAAAGACAGTAAATAAAGAAGAAGTCCCGACT  
AACTTCGTGCCAGCAGTCGCGGTAATACGGAGGGGGCAAGCGTTATTCACCTTGACTGGG  
CGTAAAGGGTATGTAGATTGTTTTAAATGTTTTAAATAAGTAATCTAAGCGCAACTTTGA  
AGTTATTTTAAAACTTTAAACCTTGAGATTTTTAGAAGCAAGTTACATTTTTTAATGTAT  
AGGTGAAATTATATGATATTAAAGAGATATCCATAAAGCGAAAGCGACTTGCTATAAATT  
TCTGACATTGAGGTACGAAAGCATGGGGATCGAACAGGATTAGAAACCCGCGTAGTCC

>Otu22594

CCAGCCTACGGGAGGCAGCAGTGGGGAATTTTGGACAATGGGCGAAAGCCTGATCCAGCA  
ATGCCGCGTGTGTGAAGAAGGCCTTCGGGTGTAAAGCACTTTTGTGAGGAAAGAAATCC  
TCTGGGTAAATACCTCGGGGGGATGACGGTACCGGAAGAATAAGCACCGGCTAACTACGT  
GCCAGCAGCCGCGTAATACGTAGGGTGCAAGCGTTAATCGGAATTACTGGGCGTAAAGC  
GTGCGCAGGCGGTTTTCGCAAGTCAGATGTGAAATCCCCGGGCTTAACCTGGGAACTGCAT  
TTGAAACTACGAGGCTAGAGTGTGTGAGAGGGGGTAGAATTCCACGTGTAGCAGTGAAA  
TGCGTAGAGATGTGGAGGAATACCGATGGCGAAGGCAGCCCCCTGGGATAACACTGACGC  
TCATGCACGAAAGCGTGGGGAGCAAACAGGATTAGAAACCCTAGTAGTCC

>Otu22625

CTAGCCTATGGGTGGCAGCAGTAGGGAATATTGCGCAATGGAGGAAACTCTGACGCAGCG  
ACGCCGCGTGGGTGATGAAGGCCTTCGGGTGCTAAAGCCCTGTGAAAGGGACGAAAAAT  
GGTATGGCTAACATCCATATCACTTGACGGTACCTTTAGAGGAAGCACCGGCTAACTACG  
TGCCAGCAGCCGCGTAATACGTAGGGTGCTAGCGTTGTTTCGGAATCATTTGGGCGTAAAG  
CGAGTGCAGGCTGTTAGCTAAGTCGGGTGTGAAATCCCTGGGCTCAACCGAGGAAGTGCA  
TCCGAAACTAGCTAGCTAGAGAATGGTAGAGGAAGGTGGAATTCCAAGTGTAGAGGTGAA  
ATTCGTAGATATTTGGAGGAATACCGGAGGCGAAGGCGGCCTTCTGGACCATTTCTGACG  
CTGAGACTCGAAAGCGTGGGGAGCAAACAGGATTAGAAACCCGCGTAGTCC

>Otu22635

CCAGCCTACGGGGTGCACCAGTGGGGAATATTGGACAATGGGGGAAACCCTGATCCAGCG  
ACGCCGCGTGTGTGAAGAAGGCCTGCGGGTGTAAAGCACTTTTAGTGGGGACAAAAAGC  
TACGGACTAATACTCTGTGGTCTTGATTTAACCCAAAGAAAAAGCACCGGCTAACTCTGT  
GCCAGCAGCCGCGTAATACAGAGGGTGCGAGCGTTGATCGGAATTACTGGGCGTAAAGC  
GCGCGTAGACGGTTTTTGTAAAGTCAGATGTGAAATCCCTGGGCTCAACCTGGGAACTGCAT  
TTGATACTGCATGGCTAGAGTATCGAAGAGGGAAGTGGAATTTCCGGTGTAGCGGTGAAA  
TGCGTAGATATCGGAAGGAACACCAATGGCGAAAGCAGCTCGCTGGGACGTGACTGACGC  
TGAGACGCGAAAGCGTGGGGAGCAAACAGGATTAGAAACCCCGGTAGTCC

>Otu22647

CCAGCCTACGGGTGCAACCAGTGGGGAATTTTGGACAATGGGCGAAAGCCTGACGCAGCG  
ACGCCGCGTGGAGGATGAAGGTCTTCGGATTGTAAACTTCTGTTAAGTGGGAAGAAATAG  
GCTTTGGGAATATCAAAGCAAGATGACTGTACCATTAAAGAAAGCACCGGCTAACTTCGT  
GCCAGCAGCCGCGTAATACGAAGGGTGCGAGCGTTATTCGGATTGATTGGGTGTAAAGG  
GTGCGCAGACGGCTTGTTAAGTCAACTGTAAATTTCTCAGCTTAAGTGAAGACAGCAG  
TAGATACTGATAGGCTAGAGAGTGGGAGAGAGAAGTGGAATTTCTCGGAGTAGCGGTAAAA  
TGCGTAGATCTCGAGAGGAACACCGATGGCGAAGGCAGCTTCTTGGTCCATTTCTGACGT  
TCAGGCACGAAAGCGTGGGGAGCAAACAGGATTAGAGACCCTCGTAGTAC

>Otu22718

CCAGCCTATGGGGCGCACCAAGTGGGGAATATTGCACAATGGGCGGAAGCCTGATGCAGCG  
ACGCCGCGTGGGGGATGAAGGCCCTCGGGTGTAAACCCCTTTACAGGAGCGGAACTG  
ACGGTACCTGGGGAAGAAGCGCCGGCTAACTACGTGCCAGCAGCCGCGTAATACGTAGG  
GCGCGAGCGTTGTCCGGATTTATTGGGCGTAAAGAGCTCGTAGGCGGCCTGTTGCGTCCG  
CTGTGAAATCCCAGGGCTTAACCCCGGGCCTGCAGTGGATACGGGCAGGCTAGAGGCAGG  
CAGGGGAGAACGGAATTCCTGGTGTAGCGGTGAAATGCGCAGATATCAGGAGGAACACCG  
GTGGCGAAGGCGGTGGTCTGGGCCGGAAGTACGCTGAGGAGCGAAAGCGTGGGGAGCGA  
ACAGGATTAGAAACCCTCGTAGTCC

>Otu22790

CCAGCCTATGGGATGCTCCAGTGGGGAATTTTGGACAATGGGCGAAAGCCTGATCCAGCA  
ACTCTGCGTGAGGGACGAAGGCCTTCTGGGTGTAAACCTCTTTCAGCAGGGACGATGAT  
GACGGTACCTGCAGAAGAAGCCCCGGCCAACTACGTGCCAGCAGCCGCGTAATACGTAG  
GGGCGAGCGTTGTCCGGAATCATTGGGCGTAAAGAGCTCGTAGGCGGCCTTTGCAAGTCG  
GGTGTAAACCTCCAGGCTCAACCTGGAGCCGCCACTCGATACTGCAATGGCTAGAGTCC  
GGTAGGGGATCACGGAATTCCTGGTGTAGCGGTGAAATGCGCAGATATCAGGAGGAACAC



CGGTGGCGAAGGCGGTGGTCTGGGCCGGAAGCTGACGCTGAGGAGCGAAAGCGTGGGGAGC  
GAACAGGATTAGAAACCCCTTGTAGTCC

>Otu22853

CCAGCCTATGGGAGGCAGCAGTGGGGAATCTTGCACAATGGGGGCAACCCTGATGCAGCG  
ACGCCGCGTGGGCGATGAAGCCCTTCGGGGTGCAAAGCTCTTTCGCTCGGGACGATAATG  
ACGGTACCGAGATAAGAAGCCCCGGCTAACTTCGTGCCAGCAGCCGCGGTAATACGAAGG  
GGGCTAGCGTTGTTTCGGAATTACTGGGCGTAAAGCGCGTGTAGGCGGGTCTTTAAGTCAG  
GGGTGAAATGCCAAGGCTCAACCTTGGAAGTGCCTTTGATACTGAAGATCTTGAGTCCGG  
GAGAGGTGAGTGGAATTGCGAGTGTAGAGGTGAAATTCGTAGATATTCGCAAGAACACCA  
GTGGCGAAGGCGGCTCACTGGCCCGGAAGCTGACGCTGAGACGCGAAAGCGTGGGGAGCAA  
ACAGGATTAGATACCCCAGTAGTCC

>Otu22858

CCAGCCTATGGGTTGCAGCAGTCGAGAATTTTTCTCAATGGGCGAAAGCCTGAAGGAGCG  
ACGCCGCGTGGGGGATGAATGGCTTCGGCCCGTAAACCCCTGTCATTTGTGAACAAACCT  
TACGATCTAATAAGTCGTGAGCTGATAGTAGCGAAAGAGGAAGGGACGGCTAACTCTGTG  
CCAGCAGCCGCGGTAATACAGAGGTCCCAAGCGTTGTTTCGATTCACTGGGCGTAAAGGG  
TGCGTAGGTGGCGGTTTAAAGTTTGATGTGAAATCTCCGAGCTTAACTCGGAAACTGCATT  
GAATACTATTCTGATTGAGGGTTGGAGGGGGGACTGGAATTCCTCGGTGTAGCAGTGAAAT  
GCGTAGATATCGAGAGGAACACCAGCGGCGAAGGCGAGTCCCTAGACAACCTCTGACACT  
GAGGCACGAAAGCTAGGGGAGCAAACAGGATTAGATACCCCCGTAGTCC

>Otu22880

CCAGCCTACGGGAGGCTGCAGTGGGGAATCTTGCGCAATGGACGAAAGTCCGACGCAGCC  
ACGCCGCGTGAGTGAAGAAGGCCTTCGGGTGTAAAGCTCTGTCTGGAGGGGACGAAAAGT  
CATCACGTTAATAGCGTGGTGATGTGACGGTACCCTCAAAGGAAGCACC GGCTAACTTCG  
TGCCAGCAGCCGCGGTAATACGAGGGGTGCAAGCGTTGCTCGGAATTATTGGGCGTAAAG  
GGTAGGTAGGTGGTCTCATTTGTCTGGGGTGAAAGCCTTGAGCTTAACTCAAGAAGTGCC  
CTAGAAACGGTGAGACTGGAGTCTTGAGAGGGGTGCTGGAATTCCC GGGTGTAGC GG TGAA  
ATGCGTAGAGATCGGGAGGAACACCAGCGGCGAAGGCGGCGACCTGGACAAGTACTGACA  
CTCAACTACGAAAGCGTGGGTAGCAAACAGGATTAGATACCCCCGTAGTCC

>Otu22908

CCAGCCTACGGGATGCAGCAGTGGGGAATATTGCGCAATGGGCGAAAGCCTGACGCAGCA  
ACGCCGCGTGAGTGAAGAAGGCCTTCGGGTGTAAAGCTCTTTCGGCTGGGAAGAAGGGT  
GTAGTCATTAATACTGAATACATTTGATGGTACCAGAGTAAGAAGCACC GGCAAACCTTCG  
TGCCAGCAGCCGCGGTAATACGAAGGGTGCGAGCGTTATTCGGAATTATTGGGCGTAAAG  
GGTTCGTAGGCGGAATAATAAGTCAAGTGTGAAATCCCCGAGCTTAACTCGGGACGTGCA  
CCTGAAACTGTAATTCCTTGAGTACTGGAGAGGGTGGTGGAATTGTTGGTGTAGGAGTGAC  
ATCCGTAGAGATCAGCAGGAACATCAGAGGCGTAAGCGACCACCTGGCCTGAAACTGACG  
CTGAGGAACGAAAGCGTGGGGAGCAAACAGGATTAGATACCCCCGTAGTCC

>Otu22918

CCAGCCTATGGGGGGCTGCAGTGGGGAATATTGGACAATGGGGGAAACCCTGATCCAGCG  
ACGCCGCGTGTGTGAAGAAGGCCTTCGGGTGTAAAGCTCTTTTGTCCGGAGCGAAAAGG  
TTATGGTGAATATCCGTGACTACTGACGGTACCGGAAGAATAAGCACC GGCTAACTACGT  
GCCAGCAGCCGCGGTAATACGTAGGGTGCGGGCGTTAATCGGAATTACTGGGCGTAAAGC  
GTGCGCAGGCGGTTTTGTAAAGCCAGATGTGAAAGCCCCGGGCTTAACCTGGGAATGGCAT  
TTGGGACTGCAAGGCTGGAGTGCGGCAGAGGAGACTGGAATTCCTGGTGTAGCAGTGAAA  
TGCGTAGATATCAGGAGGAATACCGATGGCGAAGGCAGGTCTCTGGGCTGACACTGACGC  
TCATGCACGAAAGCGTGGGGAGCAAACAGGATTAGATACCCCGTGTAGTCC

>Otu22942

CCAGCCTATGGGGTGCACCAGTAAGGAATATTGGTCAATGGGCGGAAGCCTGAACCAGCC  
ATGCCGCGTGCAGGAAGACGGCCCTACGGGTGTAAACTGCTTTTGCAGGGGAATAAACC  
CCCGTTCGTGACCGGGGCTGAATGTACCCTGAGAATAAGGATCGGCTAACTCCGTGCCAG  
CAGCCGCGGTAATACGGAGGATCCGAGCGTTATCCGGATTTATTGGGTCTAAAGGGTGCG  
TAGGCGGCCTGTTAAGTCAGGGGTGAAAGACGGTAGCTCAACTATCGCAGTGCCTTTGAT  
ACTGACGGGCTTGAATGGACTAGAGGCAGGCGGAATGTGACAAGTAGCGGTGAAATGCAT  
AGATATGTACAGAACACCGATTGCGAAGGCAGCCTGCTATGGTTTTGATTGACGCTGAGG  
CACGAAAGCGTGGGGATCAAACAGGATTAGAAATCCTCGTAGTCC

>Otu22944

CCAGCCTACGGGGGGCAGCAGTGGGGAATATTGGACAATGGGCGCAAGCCTGATCCAGCA

ATGCCGCGTGTGTGAAGAAGGCCTGCGGGTTGTAAAGCACTTTCACTGGGGAAGAAGGGT  
TTATGTTAAATAGACATAAGCATTGACGGTACTCAGAGAAGAAGCACCGGCTTACTCTGT  
GCCAGCAGCCGCGTAATACAGAGGGTGCAAGCGTTAATCAGAATTACTGGGCGTAAAGA  
GCACGTAGGTGGTTAATTAAGTCGGCTGTGAAATCCCTGGGCTTAACCTGGGAATTGCAT  
TTGAAACTGGTTAGCTAGAGTATGGTAGAGGAGAGTGGAATTTCCGGTGTAGCGGTGAAA  
TGCGTAGATATCGGAAGGAACACCAGTGGCGAAGGCGACTCTCTGGACTAATACTGACAC  
TGAGGTGCGAAAGCGTGGGGAGCAAACAGGATTAGAAACCCGAGTAGTCC

>Otu22949

CCAGCCTATGGGATGCAGCAGTCGAGAATCATTCGCAATGGGCGAAAGCCTGATCGAGCG  
ATACCGCGTGGTGGATGAAGCGCTTCGGCGCGTAAACATCTTTTATGGAGGAGGAAGTTA  
TTGACGTTACTCCATGAATAAGGGGCTCCTAACTCTGTGCCAGCAGGAGCGGTAATACAG  
AGGCCCCGAGCGTTACCCGGAATTACTGGGCGTAAAGAGTGCGTAGGTGGTCGTGTAGT  
CGTCCGTCAAAAACCCAGGGCTCAACCCTGGATCCGCGGGCGAAACGGCACGACTTGAGGG  
CGTGAGAGGTCTGTGGAACCTCTGGGTGTAGGGGTGAAATCCGTTGATATCCAGGGGAACA  
CCGAAAGCGAAGGCAGCAGACTGGCGCGTTCTGACACTCAAGCACGAAAGCGTGGGTAG  
CGAACGGGATTAGATACCCCTTGTAGTCC

>Otu22950

GGACTACAGGGGTATCTAATCCTGTTTGCTCCCCACGCTTTCGCACCTGAGCGTCAATAC  
CAGACCAGGTAGCCGCTTCGCCACCGGTGTTCTTCCCAATATCTACGAATTTACCTCT  
ACACTGGGAATTCGCTACCCCTCTTCTGGATTCTAGCTCGTCAGTCTTAGAAGCAATTCC  
CGGGTTGAGCCCAGGGCTTTCACCTCTAATTTAGCGAGCCGCTGCGTGCGCTTTACGCC  
CAGTAATTCGAACAACGCTAGCCCCCTTCGTATTACCGCGGCTGCTGGCACGAAGTTAG  
CCGGGGCTTCTTCTGCGGGTACCGTCATCATCGTCCCCGCCGAAAGAGCTTTACAACCT  
AAGGCCTTCATCACTCACGCGGCATTGCTGGATCAGGGTTTCCCCCATGTCCAATATTC  
CCCACTGCAGCCCCCGTAGGCTGG

>Otu22968

CCAGCCTACGGGTGGCAGCAGTGGGAAATATTGGACAATGGGGGAAACCCCTGATCGAGCG  
ACGCCGCGTGCAAGGATGAAGTTCTTCGGGGTGTAAGCTTTTATGAGCGAGAAAGTTT  
ATTGATCAGCTCATGAATAAGAGGTTGCTAAACTCGTGCCAGCAGCAGCGGTAATACGAG  
TGCCTCAAGCGTTATCCGGAATCATTGGGCGTAAAGGATGTGTAGGTGGTCGCGTTAGTC  
TCCGTTAAATTTTTTCGGCTCAACCGGAAACATGCGGGGAAACGGCGCGACTTGAGGAT  
GCGAGGGGTCTGTGGAACCTCATAGTGTAGCGGTGAAATGCGTTGATATTATGGGGAACAC  
CAAAGCGAAGGCAGCAGACTGGAGCACTCCTGACACTGAAACATGAAAGCGTGGGTAGC  
GAACGGGATTAGAAACCCGAGTAGTCC

>Otu22970

CCAGCCTATGGGAGGCTGCAGTGGGGAATCTTGAACAATGAGCGAAAGCTTGATTTCAGCG  
AAATCACATGAATGATGAAGTTCATTTCGTAAAGTTCTTTTTTAAGTGAAAATAATGATAT  
TAACTTAAGAATAAGCATCGACAAACCTCGTGCCAGCAGTCGCGGTGATACGGGGGATGC  
GGGTGTTACTCAGCATTACTGGGCGTAAAGAGTATGTATGGTGGTTTTATTAATTTTAGT  
TGAAAGACAAAGCTTTTGTA AAAA ACTTTAATATTTTAAAACTTAGAGTGCATATCACGTA  
AATAGTATTTATAGAGTAAAGGTGAAATTTTTATATACTATAAAGACTGTCAAATGATTA  
AAATTATTTACTAGAATGCACTGACGCTAAAGTACGAAGGCGTGGGGATCAAAAAGGATT  
AGAAACCCAGTAGTCC

>Otu22972

CCAGCCTACGGGTTGCTCCAGTGGGGAATTTTGACAATGGGCGAAAGCCTGATCCAGCT  
ATGTCGCGTGATGATGAAGGCCTTCTGGGTTGTAAAGTCCTTTTCGGTGGGGAAGATAAT  
GACGGTACCCACAGAAGAAGTCCCGGCTAACTCCGTGCCAGCAGCCGCGGTAATACGGAG  
GGGCTAGCGTTATTCGGAATGACTGGGCGTAAAGTGCGCGTAGGCGGT CATATAAGTCT  
TTTAGTGAAAGCCCTGGGCTTAACCCAGGAAC TGTAGGGATACTGTATGACTAGAGTGT  
AGGAGGGGGTGATGGAATCTTCGGTGGAGAGGTGAAATCTTAGATATCGGAGAGAACGT  
CGGAGGCTAAGGCGATCACCTGGAATACAAC TGAACGCTGAGGCGCGAAAGCGTGGGGAGC  
AAATCGGATTAGAAACCCCTTGTAGTCC

>Otu22980

CCAGCCTACGGGGGGCTGCAGTCAGGAATATTGCGCAATGGAGGAAACTCTGATGGAGTG  
ACGCCGCGTGATTGATGAAGTGGTTCGCCATGTAAAGATCTTTTATGAGGGAAGAAGTAT  
ATTGACGGTACCTCATGAATAAGGGGCTCCTAACTCTGTGCCAGCAGGAGCGGTAATACA  
GAGGCCCAAGCGTTATCCGGAATTATTGGGCGTAAAGGGTGTGTAGGTGGCATTGTTAG  
TCGTTTGTGAAAGCCCGGGGCTCAACCTCGGATCCGCGAACGGAACGGCAAAGCTTGAGT

ATGTGAGAGGTAAGCGGAACTCATGGTGTAGGGGTGAAATCCGTTGATATCATGGGGAAC  
ACCAAAAGCGAAGGCAGCTTACTGGCACATTACTGACACTGAAACACGAAAGCGTGGGTA  
GCAAATGGGATTAGAAACCCCTGGTAGTCC

>Otu22982

CCAGCCTACGGGTTGCTGCAGTGGGGAATCTTGCGCAATGGACGAAAGTCTGACGCAGCA  
ACGCCGCGTGGGTGATGAAGGTCTTCGGATCGTAAAGCCCTGTCGGAGGGGAAGATGCGT  
AACTAGTCGAATAGGCTAGGGACGTGACGGTACCCTCAAAGGAAGCACCGGCTAACTCTG  
TGCCAGCAGCCGCGGTAATACAGAGGGTGCAAGCGTTGTTTCGGAATTATTGGGCGTAAAG  
GGAGTGTAGGCTGTGAGGTAAGTCTTCTGTGAAATCTACGGGCTTAGCCTGTAACGTGCA  
GAGGAACTGCTTCGCTTGAGTGTGCGAGAGGATAGGGGAATACCCGGTGTAGAGGTGAA  
ATTCGTAGAGATCGGGTGGAACACCAGTGGCGAAGGCGCCTATCTGGCTGACAACTGACG  
CTGAGACTCGAAAGCATGGGGAGCAAACAGGATTAGAAACCCCGGTAGTCC

>Otu22983

CCAGCCTACGGGGGGGCACCAGTTTTCGAATCATTACACAATGGGCGAAAGCCTGATGGTGC  
ACGCCGCGTGAGGGACGAAGGCCTTCGGGTTGTAAACCTCTGTCACCGGGGAAGAAACGC  
TCCATTTTAAATAGAATGAAGCCTGACTTAACCCGAGAGGAAGCAGTGGCTAACTCTGTG  
CCAGCAGCCGCGGTAATACAGAGACTGCGAGCGTTATTTCGATTCACTGGGCGTAAAGGG  
TGCGCAGGCGGCCGTGTGTGTGAGGCGTGAAATACCGAGGCTTAACCTCGGAATTGCACC  
TCAAACCTACACGGCTAGAGCATTTGGAGAGGGTAGCGGAATTCACGGTGTAGCAGTGAAAT  
GCGTAGATATCGTGAGGAACACCAGAGGCGAAGGCGGCTACCTGGACAATTGCTGACGCT  
CAGGCACGAAAGCGTGGGGAGCAAAGGGATTAGAAACCCAGTAGTCC

>Otu22990

CCAGCCTACGGGGGGGCACCAGTGGGGAATTTTGGACAATGGGGGCAACCCTGATCCAGCC  
ATGCCGCGTGGGTGAAGAAGGCCTTCGGGTTGTAAAGCCCTTTCGGCGGGGAAGAAAACG  
CAGTGGCGAATACCTGCTGTGGATGACGGTACCCGCATAAGAAGCACCGGCTAACTACGT  
GCCAGCAGCCGCGGTAATACGTAGGGTGCGAGCGTTAATCGGAATTACTGGGCGTAAAGC  
GTGCGCAGGCGGTTTCGTAAGACAGACGTGAAATCCCCGGGCTCAACCTGGGAACTGCGT  
TAGTGACTGCGAAGCTAGAGTAAGGCAGAGGGAGGTGGAATTCACGTGTAGCAGTGAAA  
TGCGTAGAGATGTGGAGGAACACCGATGGCGAAGGCAGCCTCCTGGGCCATTACTGACGC  
TCATGCACGAAAGCGTGGGGAGCAAACAGGATTAGAAACCCAGTAGTCC

>Otu22995

CCAGCCTACGGGAGGCTCCAGTGAGGAATATTGCGCAATGGGGGCAACCCTGACGCAGCA  
ACGCCGCGTGAGTGAGGAAGTTTTTCGGACCGTAAAGCTCTGTCGAGCGGGAAGAAATGTG  
TGGTGGCTAATATCCATCATGCTTGACGGTACCGCTAAGGGAAGCACCGGCTAACTCCGT  
GCCAGCAGCCGCGGTAATACGGGGGGTGCTAGCGTTGTTTCGGAATCATTGGGCGTAAAGA  
GCGTGTAGGCGGCTGGATAAGTCGGATGTGAAAGCCCTGGGCTCAACCCGGGAAGTGCAT  
TTGAAACTGTTTCAGCTTGAGTAAGGGAGAGGGAAGTGGAATTCCTGGTGTAGAGGTGAAA  
TTCGTAGATATCAGGAGGAACACCGGTGGCGAAGGCGACTTCCTGGCCCTATACTGACGC  
TGAGACGCGAGAGCGTGGGTAGCAAACAGGATTAGAAACCCAGTAGTCC

>Otu23008

CCAGCCTATGGGTTGCTCCAGGCGCGAAAACTTTACAATGCGAGAAATCGTGATAAGGGA  
ACCCCGAGTGCCCGTAAAGTCGGGCTGTTCTGATGTGTAAAAAGCATCAGGAGAAAGGGC  
CGGGCAAGACCGGTGCCAGCCGCCGCGGTAATACCGGCGGCTCGAGTGGTGGCCACTATT  
ACTGGGCTTAAAGCGTTCGTAGCTGGAGTGTTAAGTCTCTTGGGAAATCTACCGGCTTAA  
CCGATAGGCGTTCAAGAGATACTGGCAATCTAGGGACCGGAGAGGTGAGAGGTACTCCA  
GGGGTAGGAGTGAAATCCTGTAATCCTTGGGGGACCACCTGTGGCGAAGGCGTCTCACTA  
GAACGGCTCCGACAGTGAGGAACGAAAGCTGGGGGAGCAAACCGGATTAGATACCCCTGT  
AGTCC

>Otu23048

CCAGCCTACGGGGGGCAGCAGTGGGGAATATTGGACAATGGGGGCAACCCTGATCCAGCG  
ATGCCGCGTGTGTGAAGAAGGCCTGCGGGTTGTAAAGCACTTTTGTGGGGAAGAGATTT  
CGCATACGAATAGTGTGTGGATGAGACATTACCCAAAGAAAAAGCACCGGCTAACTCTGT  
GCCAGCAGCCGCGGTAATACAGAGGGTGCGAGCGTTAATCGGAGTTACTGGGCGTAAAGG  
GCGCGTAGGCGGATTGATAAGTCAGATGTGAAATACCCGAGCTTAACTTGGGGGAGTCGT  
CTGATACTGTCACTCTAGAGTATTGGAGAGGGAAGTGGAATTTCCGGTGTAGCGGTGAAA  
TGCGTAGATATCGGGAGGAACACCAGTGGCGAAGGCGGCTTTCTGGCCCGTTCTTGACGC  
TGAGGCGCGAAAGCTAGGGTAGCAAACGGGATTAGATACCCCTGTAGTCC

>Otu23082

CCAGCCTACGGGACGCAGCAGTCGAGGAAAATTTTTCAATGCCCCGAAAGGGTGAACGAGTA  
AGTCAGAGTGTCTTTCTTTACGAAAACCTTTTGTCTGTTGTAAAAAGACAGACGAATAAGGA  
CTGGGCAAGACCGGTGCCGGCCGCCGCGTAATCCCGCGGTCCAAGTCGCATCCACAAT  
TATTGGGTCTAAAACATCCGTAGCTTGTTTTGTAAAGTCTCTTGTGAAATTCATATCTTA  
AGTATGGAGCGTGCAAGAGATACTACAAGACTAGAGGCCGAGGACGCAAAGAGTACGAT  
CGAGGTAGCGGTAAAATGTGTTAATCTTGGTCGGACTAACAGTGCGCAAGGCGCTTTGCG  
AGTACGGATCTGACAGTGAGGGATGAAGGCTAGGGGCGCAAAGGGATTAGAGACCCAG  
TAGTCC

>Otu23085

CCAGCCTACGGGACGCTGCAGGCGCGAAAACCTCTGCAATGCAGGCAACTGCGACAGGGGG  
ACATCGAGTGGCATCCACCTTGGGTGCCCGTCCACCGTCTAAAAAACGGTGGTTAGCAA  
GGGCCGGGCAAGACCGGTGCCAGCCGCCGCGTAATACCGGCGGCTCGAGTGGTGGCCGA  
TATTATTGAGTCTAAAGGGTCCGTAGCCGGCTTTGCAAGTCCCATGGGAAATCCAGCGGC  
TTAACCGTTGGGCTTTCATGGGATACTACATTGCTTGGGACTGGGAGAGGTAGGGGGTAC  
TCGGGGGGTAGGGGTGAAATCCTGTAATCCTCCGGGGACCACCGGTGGCGAAGGCGTCCT  
ACCAGAACAGGTCCGACGGTGAGGGACGAAAGCTAGGGGCACGAACCGGATTAGAGACCC  
CCGTAGTCC

>Otu23102

CCAGCCTACGGGGTGCTGCAGTAGGGAATATTGGGCAATGGGCGAAAGCCTGACCCAGCC  
ATGCCGCGTGCAAGGATGAAGGCCTTCTGGGTGTAAACTGCTTTTCTACGGGAAGAAACG  
CTCCCTGCGGGGAGAATTGACGGTACCGTAGGAATAAGCACCGGCTAACTCCGTGCCAGC  
AGCCGCGGTAATACGGAGGGTGCAAGCGTTGTCCGATTACTGGGTTTAAAGGGTGCGT  
AGGCGGATTGTTAAGTCAGTGGTGAAAGCCTGCGGCTTAACCGCAGAAGTGCCATTGATA  
CTGGCAATCTTGAGTGCAGTGGAGGTAGGCGGAATTTATGGTGTAGCGGTGAAATGCATA  
GATACCATAAAGAACACCTATAGCGAAGGCAGCTTACTACACTGCAACTGACGCTGAGGC  
ACGAAAGCGTGGGGATCAAACAGGATTAGATACCCTGGTAGTCC

>Otu23109

CCAGCCTATGGGGGGCACCAGTGGGGAATTTTCCGCAATGGGCGAAAGCCTGACGGAGCG  
ACGCCGCGTGAGGATGAAGGTTTTTCGGATCGTAAACTCCTGTAGAGCGGGAAGATGGGT  
GCAGCAATGCATCTGACAGTACTGCTAAAGTAAGCTACGGCAAACCTCTGTGCCAGCAGCC  
GCGGTTATACAGAGGTAGCTAGCGTTGTTTCGGAATGACTGGGTGTAAAGGGTGTGTAGGC  
GGTTTTGTAAAGTTGAATGTGAAATCCCCCGGCTTAACCGGGGAAGTGCATTCAAACCTGC  
ATAACTTGAGTGCGAAAGAGGAAAGCGGAATTTCTGGTGTAGCGGTAAAATGCGTAGATA  
TCAGAAGGAACACCTGTGGCGAAGGCGGCTTTCTGGTTTCGCAACTGACGCTGATACACGA  
AAGCTAGGGGAGCAAACAGGATTAGAGACCCTAGTAGTCC

>Otu23123

CAGCCTATGGGATGCTGCAGTGGGGAATCTTGCGCAATGGGCGAAAGCCTGACGCAGCAA  
CGCCGCATGGAGGACGAAGGCTTTCTGAGTTGTAAACTCCTTTACAGAGGGACGATAGTG  
ACGGTACCTGCAGAAGAAGCACCGGCCAACTACGTGCCAGCAGCCGCGGTGATACGTAGG  
GTGCAAGCGTTGTCCGATTTATTGGGCGTAAAGAGCTCGTAGGCGGTTTGATTAGTCGG  
GTGTGAAACCTCCAGGCTCAACCTGGAGCCGCCACTCGATACTGTCATGACTAGAATTGCG  
GTAGGGGACCACGGAATTCCTGGTGTAGCGGTGAAATGCGTAGATATCAGGAGGGACACC  
GGTGGTGTAGACGGCTCTCTGGACCATTACTGACGCTGAGACACGAAAGCGTGGGTAGCA  
AACAGGATTAGAAACCCAGTAGTCC

>Otu23134

CCAGCCTACGGGTGCGAGCAGTAACGAATATTCCGCAATGGGCGAAAGCCTGACGGAGCG  
ACGCCGCGTGCAAGGAAGAAGCTCTTCGGGGTGTAAGTCTGTCAGGGGTTACCAAGCAA  
AGGAGGCTAATACCCTCCTGAGTTGAGGAGCCCCAGAGGAAGCCACGGCTAACTTCGTGC  
CAGCAGCCGCGGTAAGACGAAGGTGGCAAGCGTTGTTTCGGAATCACTGGGCTTAAAGAGC  
ACGTAGGCGGCCCATCAAGTGTCTGTGAAATCCCCCGGCTCAACCGGGGAATGGCTGGG  
CAAACCTGATCGGGCTTGAGGCAGGTAGGGGCGAGTGGAACCTCTTGGTGGAGCGGTGGAAT  
GCGTAGATATCAAGAGGAACGCCGGAGGTGAAGACGGCTCGCTGGGCTGTCCTGACGCT  
GAGGTGCGAAAGCCAGGGGAGCAAACGGGATTAGATACCCGTGTAGTCC

>Otu23139

CCAGCCTATGGGTGCTCCAGTCGAGAATTTTTTCAATGGGCGCAAGCCTGATGGAGCGA  
CGCCGCGTGGGGGATGAATGGCTTCGGCCCCGTAAACCCCTGTCATTTGCGAACAATGCGT  
TATGCCTAATAAGTGTGACGTTGATAGTAGCGAAAGAGGAAGGGACGGCTAACTCTGTGC  
CAGCAGCCGCGGTAATACAGAGGTCCCAAGCGTTGTTTCGGATTTACTGGGCGTAAAGGGT

GCGTAGGTGGCGAGGCAAGTCTGATGTGAAGTCTCGGAGCTCAACTCCGAAACGGCATTG  
GAAACTGCCCTGCTCGAGGGTTGGAGGGGGGACTGGAATACTTGGTGTAGCAGTGAAATG  
CGTAGATATCAAGTGGAAACACCAAGTGGCGAAGGCGAGTCCCTGGACGACTCCTGACACTG  
AGGCACGAAAGCTAGGGGAGCAAACAGGATTAGATACCCCTGTAGTCC

>Otu23171

CCAGCTATGGGTGACACCAGTAACGAGTATTGGGCAATGGGCGAAAGCCTGACCCAGCGA  
CGCCGCGTGTGGGATGAAGTCCTTCGGGATGTAAACCACTGTCAGGGGCTACCAAGTGTC  
CGCGCCCAACATGCGCGGGAGTTGAGGAGCCTCAGAGGAAGCCACGGCTAACTTCGTGCC  
AGCAGCCGCGGTAAGACGAAGGTGGCGAGCGTTGTTTCGGATTTCATTGGGCTTAAAGAGCA  
CGTAGGCGGCCCTTCAAGTGTCTTGTGAAATCCCTCGGCTCAACCGAGGAATTGCTGGGC  
ATACTGTTCGGACTTGAGGTAGGTATGGGCGAGTGGAATCTTGGTGGAGCGGTGGAATGC  
GTAGATATCAAGAGGAACGCCGGTGGTGAAGACGATTTCGCTGGGCCTATCCTGACGCTGA  
GGTGCGAATGCCAGGGGAGCAAACAGGATTAGATACCCCCGTAGTCC

>Otu23179

CAGCCTATGGGTGCTCCAGTGGGGAATTTTGGACAATGGGCGCAAGCCTGATCCAGCAA  
TGCCGCGTGCAGGACGAAGGCCTTCGGGTTGTAACTGCTTTTGTACGGAACGAAACGGT  
CCTTTCTAATACAAGGGGCTAATGACGGTACCGTAAGAATAAGCACCGGCTAACTACGTG  
CCAGCAGCCGCGGTAATACGAAGGGGGCTAGCGTTGTTTCGGATTTACTGGGCGTAAAGCG  
CACGTAGGCGGATCTTTAAGTCAGGGGTGAAATGCCGAGGCTCAACTTCGGAAGTGCCTT  
TGATACTGGAGATCTTGAGTTCGGGAGAGGTGAGTGGAATGCGAGTGTAGAGGTGAAAT  
TCGTAGATATTGGGAAGAACACCAGTGGCGAAGGCGGCTCACTGGACCGATACTGACGCT  
GAGGCGCGAAAGCGTGGGGAGCAAACAGGATTAGAGACCCTGGTAGTCC

>Otu23181

CCAGCTATGGGGTGCTGCAGTCAAGAACTTCCACAATGGACGAAAGTCTGATGGAGCGA  
CGCCGCGTGGCTGATGAAGTCCTTCGGGACGTAAAAACCTTTTATGGAGGAGGAAGTAAT  
TGACGTTACTCCATGAATAAGGGGCTCCTAACTCTGTGCCAGCAGGAGCGGTAATACAGA  
GGCCCCAAGCGTTATCCGGAATCACTGGGCGTAAAGGGTGTGTAGGCGGCTTTATTAGTC  
GTCTGTGAAAGACCTTGGGCTTAACCCAGGGGACGCAGACGAAACGGTAGAGCTTAGAGG  
ATGTGAGAGGTACAGGGAACCTCATGGTGTAGGAGTGAAATCCGTTGATATCATGGGGAAC  
ACCAAATGCGAAGGCACTGTACTGGCACACTCCTGACGCTGAGACACGAAAGCGTGGGAA  
TCGAATGGGATTAGATACCCCTGTAGTCC

>Otu23196

CCAGCCTACGGGACGCTGCAGTAAGGAATATTGGTCAATGGACGCAAGTCTGAACCAGCC  
ATGCCGCGTGTGTGAAGAAGGCCTTCGGGTGTAAAGCACTTTTGTCCGGAACGAAACGG  
CGGATGCTAATAACATCCGTTAATGACGGTACCGGAAGAATAAGCACCGGCTAACTACGT  
GCCAGCAGCCGCGGTAATACGTAGGGTGCAAGCGTTAATCGGAATTACTGGGCGTAAAGC  
GTGCGCAGGCGGTTTCGCTAAGACAGATGTGAAATCCCCGGGCTTAACCTGGGAACTGCAT  
TTGTGACTGGCGGGCTAGAGTATGGCAGAGGGGGGTAGAATTCCACGTGTAGCAGTGAAA  
TGCGTAGAGATGTGGAGGAATACCGATGGCGAAGGCAGCCCCCTGGGCCAATACTGACGC  
TCATGCACGAAAGCGTGGGGAGCAAACAGGATTAGAGACCCTTGTAGTCC

>Otu23201

CCAGCCTATGGGACGCTCCAGTCGAGAATTTTTCACAATGGACGAAAGTCTGATGGAGCG  
ACGCCGCGTGGAGGATGAAGGTTTTTCGGATTGTAACTCCTGTCACTGCAGAACAAGGAT  
GTGTGGATGAATAGTCCCCACATTTGATGGTATGCGGAGAGGAAGGGACGGCTAACTCTG  
TGCCAGCAGCCGCGGTAAGACAGAGGTCCCGAGCGTTGTTTCGGATTTCATTGGGCGTAAAG  
CGTGCGCAGGTGGTTTTCGTAAGTCAGATGTGAAAGCCCCGGGCTTAACCTGGGAATGGCA  
TTTGAGACTGCGAAGCTAGAGTACGGCAGAGGGAGGTGGAATTCCACGTGTAGCAGTGAA  
ATGCGTAGATATGTGGAGGAACACCGATGGCGAAGGCAGCCTCCTGGGCCAGTACTGACG  
CTCATGCACGAAAGCGTGGGGAGCAAACAGGATTAGAGACCCGCGTAGTCC

>Otu23202

CCAGCCTACGGGGGGCACCAGTGGGGAATATTGCGCAATGGGGGCAACCCTGACGCAGCA  
ACGCCGCGTGAAGTGGAGAAGGCCTTTGGGTGTAAAGCTCTTTCGGCCGGAAGAAGGGG  
TAAGGTGTTAATAGTATCTTACTTTGATGGTACCGGAAGAAGAAGCACCGGCTAACTTCG  
TGCCAGCAGCCGCGGTAATACGAAGGGTGCAGCGTTGTTTCGGAATTACTGGGCGTAAAG  
GGTTTGTAGGCAGAGATGTAAGTCAAGTGTGAAATCCCCGAGCTAAACTTGGGACGTGCA  
TTTGAAACTGTGTTTCTTGAGTATCGTAGAGGGTGGTGGAAATTGTTGGTGTAGGAGTGAC  
ATCCGTAGAGATCAGCAGGAACATCGGAGGCGAAAGCGACCACCTGGCCGATTACTGACG  
CTGAGGAACGAAAGCGTGGGGAGCAAACAGGATTAGATACCCCAGTAGTCC

>Otu23206

CCAGCCTACGGGGGGCAGCAGTAGGGAATATTGCGCAATGGGGGAAACCCTGACGCAGCC  
ACGCCGTGTGGGTGAGGAAGGCCTTCGGGTTGTAAAGCCCTGTCGCCTGGGAAGAAACGC  
CAATTGGGGAAAGTTTCAGTTGGTTTGACGGTACCAGGAGAGGGAGCACCGGCTAACTCTG  
TGCCAGCAGCCGCGGTAATACAGAGGGTGCAAGCGTTGTTTCGGAATTACTGGGCGTAAAG  
CGTTTGTAGGCTGTGCTGAGAGTCCTAGGTGAAATCCCCGAGCTCAACTCGGGAAGTACC  
CAGGAGACCTCAGCACTAGAGTACTGAAGGGGTTGCTGGAATTCCAAGCGTAGCGGTGAA  
ATGCGTAGATATTTGGAGGAACACCTGTGGCGAAGGCGGGCAACTGGTCAGAGACTGACG  
CTGAGAAACGAAAGCGTGGGGAGCAAACAGGATTAGAGACCCCAGTAGTCC

>Otu23250

CAGCCTATGGGTTGCTGCAGTAAGGAATATTGGTCAATGGGCGCAAGCCTGATCCAGCCA  
TGCCGCGTGAGTGAAGAAGGCCTTCGGGTTGTAAAGCTCTTTCGGCGGGGACGATGATGA  
CGGTACCCGCATAAGAAGCCCCGGCAAACCTTCGTGCCAGCAGCCGCGGTAATACGAAGGG  
GGCTAGCGTTGTTTCGGAATTACTGGGCGTAAAGCGAACGTAGGCGGTGTTCCATGTCAGA  
GGTGAAGCCTGGGGCTCAACTCCAGAATTGCCTTTGAAACGGGGACGCTGGAGTCCGAG  
AGAGGATGGCGGAATTCCTAGTGTAGAGGTGAAATTCGTAGATATTAGGAAGAACACCGG  
TGCGAAGGCGGCCATCTGGCTCGGTACTGACGCTCAGGTTCGAAAGCGTGGGGAGCAAA  
CAGGATTAGAAACCCGTGTAGTCC

>Otu23291

CCAGCCTATGGGTTGCAGCAGTTGGGAATCTTGCAGCAATGGGGGCAACCCTGACGCAGCG  
ACGCCGCGTGCGGGATGACGATCTTCGGATTGTAAACCGCTTTTCTCGGGGACGATAATG  
ACGGTACCCGAGGAATCAGCCCCGGCTAACTCCGTGCCAGCAGCCGCGGTAAGACGGAGG  
GGGCAAGCGTTGTCCGGAATTACTGGGCGTAAAGAGCTCGTAGGCGATCTCTTACGGCGA  
TGGTGAAAGCTCCCGGCTCAACTGGGAGAGGCCCCGTGCGACCGGAGAGACTCGAGGGTGG  
TAGAGGCAAATGGAATTCCTGGTGTAGCGGTGAAATGCGTAGAGATCAGGAGGAACACCC  
GTGGCGAAGGCGGTTTGTCTGGGCCATACCTGACGCTGAGGAGCGAAAGCCAGGGGAGCGA  
ACGGGATTAGAGACCCTAGTAGTCC

>Otu23292

CCAGCCTATGGGTGGCTGCAGGCGCGAAACCTTACAATGCGCGAAAGCGTGATAGGGGAA  
CTCTGAGTGGCAGCCGGCTTTTGCCGACTGTCTTTTGCCAACCTCAAAACGGTTGCAGAA  
TAAGTTCTGGGTAAGACCAGTGCCAGCCGCCATGTGCAACAGCACAATGCGCACGGTACG  
CGTAATACTGGCAGAACGAGTGGTGTCCACGAATATTGGGTCTAAAGAGACCGTAGCTG  
GCCCCGTAAGTCCACTGTGAAATCTTGGGGCTTAACCTCAAGGCGTGCACTGGATACTGA  
CGGGCTCGAGAGCGGGGGAGGTCAGGGGTACTTACGGGGTAAGGGTAAAATCTGTTGATC  
CTGTAAGGACCACCAGTGGCGAAGGCGCCTGACCAAAACGCGTCTGACAGTGAGGGTTCG  
AGGCTAGGAGAACGAATCGGATTAGAGACCCGAGTAGTCC

>Otu23319

CCAGCCTACGGGAGGCAGCAGTAAGGAATATTGGACAATGGGCGAAAGCCTGATCCAGCC  
ATGCCGCGTGAAGGATTAAGGTCCTCTGGATTGTAAACTTCTTTTATTTGGGACGAAAAA  
AGGGAATTCTTTCCCACTTGACGGTACCAGAGGAATAAGCACCGGCTAACTCCGTGCCAG  
CAGCCGCGGTAATACGAGGGTGCAAGCGTTATCCGGATTCAGTGGGTTTAAAGGGTGCG  
TAGGCGGGTAAGTAAGTCCGTGGTGAAATCTCTGAGCTTAACTCAGAAACTGCCGTGGAT  
ACTATTTGCCCTTGAATATTGTGGAGGTGAGCGGAATATGTCATGTAGCGGTGAAATGCTT  
AGATATGACATAGAACACCAATTGCGAAGGCAGCTCACTACACAATTATTGACGCTGAGG  
CACGAAAGCGTGGGGATCAAACAGGATTAGAAACCCGAGTAGTCC

>Otu23338

CCAGCCTACGGGTGGCAGCAGTAACGAATCTTCCGCAATGCACGAAAGTGTGACGGAGCG  
ACGCCGCGTGTGGGACGAAGTTCTTCGGAATGTAAACCACTGTCAGGGGTTAGAAAGTTC  
TGATCAACCCAGAGGAAGGCACGGCTAACTCTGTGCCAGCAGCCGCGGTAATACAGAGG  
TCCAAGCGTTGTTTCGGATTCAGTGGGCGTAAAGGGTGCGTAGGCGGTTTGACAAGTCTG  
ATGTGAAATCCCGCAGCTTAACTGCGGAACGGCATTGGAAACTGTCTGACTAGAGGAATG  
GAGGGGAGACTGGAATGCTTGGTGTAGCAGTGAAATGCGTAGATATCAAGCGGAACACCA  
GTGGCGAAGGCGAGTCTCTGGACATTTCTTGACACTGAGGCACGAAAGCGTGGGGATCAA  
ACAGGATTAGATACCCGCGTAGTCC

>Otu23372

CCAGCCTACGGGGGGGCTCCAGTAAGGAATATTGGACAGTGGAGGCAACTCTGATCCAGCC  
ATGCCGCGTGAAGGATGAAGGCCCTACGGGTTGTAAACTTCTTTTCTCTTAGAAAAAACT  
CTTGTTTTCGTACCGAGACTGATTGTACAAGAGGAATAAGCATCGGCTAACTTCGTGCCA

GCAGCCGCGGTAATACGAAGGATGCAAGCGTTATCCGGATTCACTGGGTTTAAAGGGTGT  
GCAGGTGGGGCAATAAGTCAGTGGTGAAAGCCCCCGACTCAATCGGGGAAGTGCCATAGA  
TACTGTTGTTCTTGAGTGTAGTTGAGGCGGATGGAATATGACATGTAGCGGTGAAATGCT  
TAGATATGCCATAGAACACCAATCGCGAAGGCAGCTCGCTACACTATTATTGACACTGAG  
GCACGAAAGCGTGGGGATCAAACAGGATTAGATAACCCGTGTAGTC

>Otu23374

CCAGCCTATGGGGGGCAGCAGTGGGGAATATTGCGCAATGGGCGAAAGCCTGACGCAGCA  
ACGCCGCGTGAGTGATGAAGGCCCTTTGGGTTGTAAAGCTCTTTCGATCGGGAAGAAGGCT  
TGTGATGTTAATAGTATTGCAAGTTGATGGTACCGATATAAGAAGCACCGGCTAACTTCG  
TGCCAGCAGCCGCGGTAATACGAAGGGTGCAAGCGTTGTTTCGGAATTATTGGGCGTAAAG  
AGTTCGTAGGTGGGAGTTTAAAGTCAAATGTGAAATCCTCAGGCTTAACCTGAGACGTGCA  
TTTGAAACTGGATTTCTTGAGTGCCAGAGAGGGTAGTGGAATTGCTGGTGTAGGAGTGAC  
ATCCGTAGAGATCAGCAGGAACACCGGAGGCGAAGGCGACTGCCTGGCTGGTAACTGACA  
CTGAGGAACGAAAGCGTGGGGAGCAAACAGGATTAGATAACCCGCGTAGTCC

>Otu23379

CCAGCCTACGGGAGGCAGCAGTAGGGAATTTTCCGCAATGGGCGCAAGCCTGACGGAGCA  
ACGCCGCGTGCAAGGAGGAAGGCCCTTCGGGTTGTAAACTGCTTTTATTGGTGACGATTTTG  
ACGGTAACCAATGAATAAGGGTCTGCTAACTACGTGCCAGCAGCCGCGGTCATACGTAGG  
ACCCAAGCGTTATCCGGAATTACTGGGCGTAAAGAGTTGCGTAGGTGGCATAGCAAGCAA  
TTAGTGAAAGCGTGAGGCTCAACCTCATAACCATTATTTGAACTGCTAAGCTTGAGCATA  
AGAGAGGTAGATGGAATTTCTAGTGTAGGAGTGAAATCCGTAGATATTAGAAGGAACACC  
GATGGCGTAGGCAGTCTACTGGCTTATTGCTGACACTAAGGCACGAAAGCGTGGGGAGCG  
AACGGGATTAGAGACCCGCGTAGTCC

>Otu23400

CCAGCCTATGGGTGGCTGCAGTAGGGAATATTGGACAATGGGCGAGAGCCTGATCCAGCC  
ATGCCGCGTGCAAGGAAGAAGGCCCTTCTGGGTTGTAAACTGCTTTTATGGCAGGGGATAAAAA  
GCCCCTGCGCGGGAAATTGAAGGTACCTGGTGAATAAGCCACGGCTAACTACGTGCCAGC  
AGCCGCGGTAATACAGAGGGTGCAAGCGTTGTCCGGATTCACTGGGTTTAAAGGGTGCGT  
AGGCGGGTAGGTAAGTCAGTGGTGAATAACCGGAGCTTAACTCCGGAAGTGCCATTGATA  
CTATCTATCTTGAATATTGTGGAGGTAAGCGGAATATGTCATGTAGCGGTGAAATGCTTA  
GATATGACATAGAACACCCATTGCGAAGGCAGCTTACTACGCATATATTGACGCTGATGC  
ACGAAAGCGTGGGGATCAAACAGGATTAGATAACCCTCGTAGTCC

>Otu23401

CCAGCCTATGGGTGGCTGCAGTTGGGAATCTTGACACAATGGGGGAAACCCTGATGCAGCG  
ACGCCGCGTGAGGATGAAGGGTTTAGGCTCGTAAACTCCTTTTATCGGGAAAGACTTAG  
GACGGTACCCGATGAATAAGCACCGGCTAACTACGTGCCAGCAGCCGCGGTAAGACGTAG  
GGTGCAAGCGTTGTCCGGATTACTGGGCGTAAAGAGCGCGTAGGCGGTCTGTTAAGTGT  
AGAGTGAAATCTCCAGGGCTCAACCCGAAACTGCTCTGCATACTGGCAGACTTGAGGGT  
CGGAGAGGTGTATGGAATTCCTGGTGTAGCGGTGAAATGCGTTGATATCAGGAGGAACAC  
CTGTGGTGTAGACAGCTTGCTGGACCATCACTGACACTGAGACACGAAAGCGTGGGTAGC  
AAACAGGATTAGAAACCCGAGTAGTCC

>Otu23407

CCAGCCTACGGGGCGCACACAGTTCGGAATATTTCGGCAATGGACGAAAGTCTGACCGAGCG  
ACGCCGCGTGCGGGATGAAGGCCCTTTGGGTTGTAAACCGCTGTCACAGGTGAGCAAATC  
ATCTTATCCTAATAAGGTAGGATGTTGAGTTAAGCTTGAGAGGAAGCCCCCGCTAATCAC  
GTGCCAGCAGCGGCGGTAATACGTGAGGGGCGAACGTTGTTTCGGTGTCACTGGGCTTAAA  
GGGTGTGTAGGTGGTTGCGTAAGTAAGGTGTGAAAGCCCTCGGCTTACCCGGGGAATTGC  
GCCTTATACTGCGTAGCTTGAGGATTACAGGGGAAGGGGGAAGTCCAGGTGTAGCGGTGA  
AATGCGCAGATATCTGGGGGAAGGCCGCGCGGAAGGCGCCCTTCTGGGTAATTCTTGAC  
ACTGAGGCACGAAAGCGTGGGGAGCAAACAGGATTAGAAACCCTCGTAGTCC

>Otu23425

CCAGCCTATGGGTTGCTCCAGTAAGGAATATTGGTCAATGGGCGGAAGCCTGAACCAGCC  
ATGCCGCGTGCAAGGAAGACGGCCCTACGGGTTGTAAACTGCTTTTATACCGGAATAACCC  
CCCGATCGTGATCGGGGCTGAATGTACGGTAAGAATAAGGATCGGCTAACTCCGTGCCAG  
CAGCCGCGGTAATACGGAGGATCCAAGCGTTATCCGGATTTATTGGGTTTAAAGGGTGCG  
TAGGCGGCCTGTTAAGTCAGGGGTGAAAGACGGTAGCTTAACTATCGCAGTGCCCTTGAT  
ACTGATGGGCTTGAATGTACTAGAGGTAGGCGGAATGTGACAAGTAGCGGTGAAATTCCTT  
AGAGATGACATAGAACACCGATTGCGAAGGCAGCTCACTAAATTGTAACTGACGCTGAGG

CACGAAAGCGTGGGGATCAAACAGGATTAGATACCCTTGTAGTCC

>Otu23433

CCAGCCTACGGGTGGCAGCAGTCGAGAGTAGTGGTCAATGGATAAGAAGTCCGAACACGT  
GACCCCAAAGAGGGAAGACGGCGTAGGTTGTAAACCTCGGTAGAGAAAGAAGACGATGAC  
GGTAAGTTTCGAGAGGGGTTCTATCCAATGATTGTGCCAGCAGATGCGGTGAGACAACGG  
GAGCTGATGTTATTCTATTTGATTGGGTATAGAGGGTATGTAGGCGGTGGTGGGAGTGA  
TGACGGGAAAACCTTGAATGATAGAAGAGACCGATTTTGACCCATGAACTCGAGTGCAGG  
ATGGATAGACGGAAGTGGTACAGGACTGGTGAAATGGGTAGAGAGTACTGGGATCTCCAG  
AGGTGGAAGCGGTCTATTGAAATGCAAACATCGGATCCATAAAGGGTGTCGATAAGGAC  
TGACGCTGAGATACGTAGGGTTAGGGAGCGAATGGGATTAGAAACCCCCGTAGTCC

>Otu23469

CCAGCTACGGGTCGCTGCAGTCGAGAATCTTCCACAATGGACGAAAGTCTGATGGAGCGA  
CGCCGCGTGAATGATGAAGTCTCCGGGACGTAAAGGTCTTTTATGGGGGAGGAGGTAAT  
TGACGTTACCCCATGAATAAGGGGCTCCTAACTCTGTGCCAGCAGGAGCGGTAATACAGA  
GGCCCCAAGCGTTATCCGGAATCACTGGGCGTAAAGGGTGTGTAGGCGGTTTTGTAGTCT  
TTTTGTTAAAGCTTTTTCGGCTTAACCGAGAAAATGCGGAAGAAACGGCAAGACTTAGAGG  
ATACGAGAGGTAGAGGGAACCTCATAGTGTAGGGGTGAAATCCGTTGATATTATGGGGAAC  
ACCAAATGCGAAGGCACTCTACTGGCGTATTCCTGACGCTGAGACACGAAAGCGTGGGAA  
TCGAACGGGATTAGATACCCTAGTAGTCC

>Otu23472

CCAGCCTACGGGGCGCTGCAGTGGGGAATCTTGCGCAATGGGCGAAAGCCTGACGCAGCG  
ACGCCGCGTGGAGGATGAAGGCCCTTCGGGTGTAAACTTCTGTTAAGTGGGAGGAAATGC  
CGATTAATAATACGAATCGGAGCTGACTGTACCATTAGAGAAAGCACCGGCTAAACTCGT  
GCCAGCAGCCGCGGTAATACGAGTGGTGCAAGCGTTATTCGGAATCATTTGGGCGTAAAGG  
GTGTGTAGACGGCATATTAAGTCAATTGTTAAATTCTCCGGCCTAACTGGAGGCAAACAA  
TAGATACTGGTGTGCTAGAGGATGGAAGAGAGAAGTGGAAATCTCGGAGTAGCGGTAAAA  
TGCGTAGATCTCGAGAGGAACACCAATGGCGAAGGCAGCTTCTTGGTCCATTTCTGACGT  
TGAAACACGAAAGCGTGGGGAGCAAACAGGATTAGATACCCCCGTAGTCC

>Otu23497

CCAGCCTATGGGTGGCAGCAGTGGGGAATTTTGCGCAATGGACAAAAGTCTGACGCAGCA  
ACGCCGCGTGGGGGATGAAGCTTCTCGGAGTGTAACCCCTTTTCGACCCGGACGAATGCC  
CGCAAGGGTTTGACGGTACGGGTATAAGAAGCCCCGGCTAACTACGTGCCAGCAGCCGCG  
GTAAAACGTAGGGGGCCAGCGTTGCTCGGAATTACTGGGCGTAAAGGGTCCGTAGGCGGT  
GTGGCAAGTCGGAAGTGAATCTCTGGGCTTAACCCAGAGGCTGCTCCCGAAACTGCCAT  
GCTAGAGTGTGAGAGAGGCGAGTGGAAATTGCCGGTGTAGCAGTGAAATGCGTAGATATCA  
TAAGGAACACCGGTGGCGAAGGCGGATACCTGGAAGATTCCTGACTCTGAAACACGAAAG  
CCAGGGGAGCAAACGGGATTAGAAACCCAGTAGTCC

>Otu23498

GGACTACGCGGGTTTCTAATCCTGTTTGCTCCCCACGCTTTCGCGTCTCAGCGTCAGCAA  
CGATCCAGAGGGCCGCTTCGCCGCCGGTATTCCTCCTGATATCTACGCATTTACCGCT  
ACACCAGGAATTCTACCCTCCTCTATCGCGCTCCAGCTGGCTAGTTTCCGATGCACTTCC  
GAGGCTAAGCCCCGGGCTTTCACATCGGACTTGACCAACCGCCTACACGCCCTTTACGCC  
CAGTCAATCCGAACAACGCTTGACCCCTCCGTCTTACCGCGGCTGCTGGCACGTAGTTAG  
CCGGGGCTTCTTATACCCGTACCGTCAAACCTTTCGGGGCTTTCTTCCGGGTGCAAAGGG  
GTTTACACTCCGAAAAGCTTCATCCCCCACGCGGCGTTGCTGCATCAGACTTTTCGCGCAT  
TGCGCAAGATTCCCCACTGCTGCCACCCGTAGGCTAG

>Otu23532

CCAGCCTACGGGGGGCTGCAGTGGGGAATATTGGACAATGGGGGCAACCCTGATCCAGCA  
ATGCCGCGTGTGTGAAGAAGGCCGTGAGGGTTGTAAAGCACTTTCAGTGGGGAGAAGGATT  
CATAGGTTAAGAGCTAATGAATTGGATGTTACCCACAGAAGAAGCACCGGCTAACTCCGT  
GCCAGCAGCCGCGGTAATACGGAGGGTGCGAGCGTTAACCGGAATAACTGGGCGTAAAGG  
GTGCGTAGGTGGTTGATTAAAGTTATCTGTGAAATCCCCGGGCTTAACCTGGGCAGGTGAG  
ATAAGACTGGACAACCTCGAGTATGGGAGAGGGTAGTGGAATTTCCGGTGTAGCGGTGAAA  
TGCGTAGAGATCGGAAGGAACACCAAGTGGCGAAGGCGGCTACCTGGCCTAATACTGACAC  
TGAGGCACGAAAGTGTGGGGAGCAAACAGGATTAGATACCCTCGTAGTCC

>Otu23546

CCAGCCTATGGGGTGCTGCAGTCGAGGATCTTCGGCAATGGGCGCAAGCCTGACGAAGCG  
ACGCCGTGTGAGCGAAGAAGGCCCTTCGGGTGTAAAGCTCTTTCGCTAGGGAACAAGAGA



TATGGGACAATACCCCATAAATTTGATGGTACTTGGTAAAGAAGCACCGGCTAACTCCGT  
GCCAGCAGCTGCGGTAATACGGAGGGTGCAAGCATTGATCGGAATTACTGGGCGTAAAGG  
GCGCGTAGGCGGCAGAATAAGTCGGATGTGAAATTCGGGGCTCAACCCCGGAGCTGCAT  
TTGAAACTATTACAGCTAGAGTTCAGTTAGGGTAAACCGAATTCACAGTGTAGCGGTGAAA  
TGCGTAGATATGTGGAAGAACACCGGTGGTGAAGACGGTTTACTGGGCTGATACTGACGC  
TGAGGCGCGAAAGCATGGGGAGCAAACGGGATTAGAAACCCCGTAGTCC

>Otu23547

CCAGCCTATGGGGGGCAGCAGTGGGGAATATTGGACAATGGGGGAAACCCTGATCCAGCA  
ATGCCGCGTGAGTGATGAAGGCCTTCGGGTGTAAAGCTCTTTTATCGGGGACGATGATG  
ACGGTACCCGATGAATAAGCTCCGGCTAACTTCGTGCCAGCAGCCGCGGTAATACGAGGG  
GAGCTAGCGTTGTTTCGGAATTACTGGGCATAAAGGGCGCGTAGGCGGTACTATAAGTCAG  
ATGTGAAAGCCCTGGGCTTAACCTAGGAGGTGCATTTGATACTGTAGAACTAGAGATCGA  
GAGAGGAAAGTGGAATTACGAGTGTAGAGGTGAAATTCGTAGATATTTCGTAAGAACACCA  
GTGGCGAAGGCGACTTTCTGGCTCGATACTGACGCTAAGAGACGAAAGCTAGGGGAGCAA  
ATGGGATTAGATACCCTGGTAGTCC

>Otu23548

CCAGCCTACGGGGTGCTGCAGTAAGGAATATTGGTCAATGGGCGGAAGCCTGAACCAGCC  
ATGCCGCGTGACAGGAAGACGGCCCTACGGGTGTAAAGCTGCTTTTATACCGGAATAAACC  
CTTTTACGTGTAAGAGGCTGAATGTACGGTAAGAATAAGGATCGGCTAACTCCGTGCCAG  
CAGCCGCGGTAATACGGAGGATCCAAGCGTTATCCGGATTCATTGGGTTTAAAGGGTGCG  
TAGGCGGCTTATTAAGTCAGCGGTGAAATCCTGGGGCTTAACCCAGAACTGCCATTGAT  
ACTGATGAGCTTGAGTACACTGAAGTGGGCGGAATGTGTCTGTAGCGGTGAAATGCTT  
AGATATGACACAGAACACCGATTGCGAAGGCAACTCACTAAATTGTCACTGACGCTGAGG  
CACGAAAGCGTGGGGATCAAACAAGATTAGAAACCCTTGTAGTCC

>Otu23554

CCAGCCTACGGGGCGCTGCAGTGGGGAATATTGGACAATGGGCGCAAGCCTGATCCAGCA  
ATGCCGCGTGGGTGAAGAAGGTTTTTCGGATTGTAAAGCCCTTTTGGCGGGGACGATGATG  
ACGGTACCCGCAGAATAAGCCCCGGCTAACTTCGTGCCAGCAGCCGCGGTAATACGAAGG  
GGGCTAGCGTTGCTCGGAATGACTGGGCGTAAAGGGCGCGTAGGCGGCGGCCAAAGTCAG  
GCGTGAAATTCCTGGGCTCAACCTGGGGGCTGCGCTTGATACTTGGTTGCTTGAGTGGGG  
AAGAGGGTCGTGGAATTCACAGTGTAGAGGTGAAATTCGTAGATATCTGCAGGAACACCC  
GTGGCGAAAGCGGCGCACTGGACCACAACCTGACGCTGAGGAACGAAAGCTAGGGGAGCAA  
ACAGGATTAGATACCCTGTAGTCC

>Otu23577

CCAGCCTATGGGTGGCAGCAGTGGGGAATATTGGACAATGGGGGCAACCCTGATCCAGCA  
ATGCCGCGTGTGTGAAGAAGGCCTTAGGGTTGTAAAGCACTTTCAGTTGGGAAGAGGAGT  
AGTAGGTTAAGAGCTAGCTACTTGGACATTACTGACAGAAGAAGCACCGGCTAACTCTGT  
GCCAGCAGCCGCGGTAATACAGAGGGTGCAAGCGTTAATCGGAATTACTGGGCGTAAAGA  
GTGCGCAGGTTGTAATTTAAGTGTTATGTGAAATGCCTGGGCTTAACCTGGGAATTGCAT  
AATAGACTGAAAATACTAGAGTCTTGTAGAGGATAGCGGAATTCACCGGTGTAGCGGTGAAA  
TGCGTAGATATCGGGAGGAACATCAGTTGCGAAGGCGGCTATCTGGACATAGACTGACAC  
TGAGGCACGAAAGCGTGGGTAGCAAACAGGATTAGATACCCGGGTAGTCC

>Otu23611

GGACTACTCGGGTTTCTAATCCTGTTTGCTCCCCACGCTTTCGTGCCTGAACGTGGGCGC  
TGGACCAGGAAGCCGCTTTTCGCCACTGATGTTTCCTTCTGATATCTACGCATTTACCCGCT  
ACACCAGAAATTCCGCTTCCCTCTTCCGCACCCTAGCTTCGCAGTCTCGAATGCAATTCC  
CAGGTTGAGCCCGGGGCTTTCACACCCGACTTACGAAACCGTCTACGCACGCTTTACGCC  
CAGTAATTCGGATTAACGCTTGCACCCCTCTGTATTACCGCGGCTGCTGGCACGAAGTTAG  
CCGGAGCTTATTCAGTGGGTACCGTCATCATCGTCCCCACCAAAGAACTTTACAACCCG  
AAGGCCTTCATCATTCACGCGGCATGGCTGGACCAGGGTTTCCCCCATTTGTCCAATATTC  
CCCACTGCTGCCTCCCGTAGGCTGG

>Otu23618

CCAGCCTACGGGATGCAGCAGTGGGAAATCTTGACAAATGGACGAAAGTCTGATGCAGCA  
ACGCCGCGTGGGGGATGAAGCTTTTCGGAGTGTAACCCCTTTTCGGCCCGGACGAATGCC  
CGCAAGGGTTTGACGGTACGGGTATAAGAAGCCCCGGCTAACTACGTGCCAGCAGCCGCG  
GTAATACGTAGGGGGCCAGCGTTGCCCGGAATTACTGGGCGTAAAGGGTCCGTAGGCGGT  
GTGGCAAGTCCGGAGTGAAATCTCTGGGCTTAACCCAGGGGCTGCTTTTGAAACTGCCGT  
GCTAGAGTGTGAGAGAGGCGAGTGGAATTACGGGTGTAGCGGTGAAATGCGTAGATATCG

GGAGGAACACCTGTGGCGAAAAGCGGCGCACTGGACCATAACTGACGCTGAGGCGCGAAAAG  
CTAGGGGAGCAAACAGGATTAGAGACCCCGTAGTCC

>Otu23619

CCAGCCTATGGGTTGCACCAGTGGGGAATATTGGACAATGGGGGAAACCCTGATCCAGCG  
ACGCCGCGTGTGTGAAGAAGGCCTGCGGGTTGTAAAGCACTTTTAGTGGGGACAAAAGC  
TACGGATTAATACTCTGTGGTCTTGATTTAACCCAAAGAAAAAGCACCGGCTAACTCTGT  
GCCAGCAGCCGCGTAATACAGAGGGTGCAGCGTTAATCGGAATTACTGGGCGTAAAGC  
GCGCGTAGACGGTTTTGTAAAGTCAGATGTGAAATCCCCGGGCTCAACCTGGGAACATGCAT  
TTGAGACTGCATGGCTAGAGTATCGAAGAGGGAAGTGGAATTTCCGGTGTAGCGGTGAAA  
TGCGTAGATATCGGAAGGAACACCAATAGCGAAGGCAGCTTACTAGACTGTAAGTACGCG  
TGAGGCACGAAAAGTGTGGGGATCAAACAGGATTAGAGACCCCTGTAGTCC

>Otu23622

CCAGCCTATGGGGTGCTCCAGCCGAGAATCATTCGCAATGGGCGAAAGCCTGACGATGCG  
ACGCCGTGTGAGCGATGAAGGCCTTAGGGTCGTAAAGCTCTTTCGCCTGGGAACAAGAGA  
AGCTGGCTAACATCCAGTGGATTTGAGGGTACCAGGTAAGGAAGCACCGGCTAACTCCGT  
GCCAGCAGCTGCGTAATACGGAGGGTGCAAGCATTAATCGGATTTATTGGGCGTAAAGG  
GCGCGTAGGCGGAAAGATAAGTCAGATGTGAAATCCCCGGGCTCAACCTCGGAACAGCAT  
TTGAAACTATCTTCTAGAGGGTAGGCGGAGAAAACAGAATTCCACAAGTAGCGGTGAAA  
TGCGTAGATATGTGAAGAATACCGGTGGCGAAGGCGGTTTTCTAGCTTACTCCTGACGC  
TGAGGCGCGAAAGCAAGGGGATCAAACAGGATTAGAGACCCCTGTAGTCC

>Otu23626

CCAGCCTATGGGTTGCACCAGTGGGGAATATTGGACAATGGGCGAAAGCCTGATCCAGCC  
ATGCCGCGTGAGTGATGAAGGCCTTAGGGTTGTAAAGCTCTTTTGTGAGGGAAGATAATG  
ACGGTACCTGAAGAATAAGCACCGGCTAACTTCGTGCCAGCAGCCGCGGTAATACGAAGG  
GGGCTAGCGTTGTTTCGAATTACTGGGCGTAAAGCGCGCGCAGGCGGCCTTTCAAGTCAG  
GGGTGAAAGCCCCGAGCTCAACTCCGGAATTGCCTTTGAAACTGTAAGGCTTGAGTACGG  
GAGAGGTGAGTGGAATCCCCAGTGTAGAGGTGAAATTCGTAGATATTGGGAAGAACACCG  
GTGGCGAAGGCGGCTCACTGGCCCGTTACTGACGCTCAGGCGCGACAGCGTGGGGATCAA  
ACAGGATTAGAGACCCCTGTAGTCC

>Otu23646

CCAGCCTACGGGGGGGCTCCAGTCAAGAATCTTGGTCAATGGGCGAAAGCCTGAACCAGCG  
AAGCTACGTGGGTGATGACAGCTATTTGGTTGTAAAGCCCCGGAGCACTATGGAGTATGT  
GACTGTAGTGTGATGAAGCTCTGACTAACTGTCGTGCCAGCAGTCGCGGTAACCTCGACGA  
GAGCGAGTGTTGATGTAAAATGGGCGTAAAGGATCCGTAGGCTGTGCATCAAGGCTTATT  
GTGAAGCTAACTTGCAATAAGTACCTTCGCACTAGAGGAGGGGTGAGGGAAACGGAATAC  
TCAAGCGACGGCTAAAATCGGTAGACCTTGAGTGGAACACCAAAGGCGAAGGCAGTTTCC  
TGGCCCCCCCCGCGCGCTTAGCGTGGCGTAACCTGACGCTGAGGGATGAAGGTTGGGGTA  
GCGAAACGGATTAGAAACCCCCGTAGTCC

>Otu23647

CCAGCCTACGGGTTGCTGCAGTCGAGGATCTTCGGCAATGGGCGCAAGCCTGACCGAGCG  
ACGCCGCGTGTGCGATGAAGGCCTTCGGGTTGTAAAGCACTGTGAGGGGGGAGGAAGCCG  
AAAGGTTGACCTATCCCTGGAGGAAGCACGGGCTAAGTTCGTGCCAGCAGCCGCGGTAAG  
ACGAACCGTGCGAACGTTGTTTCGAATCACTGGGCTTAAAGGGCGCGTAGGCGGGTCATC  
AAGTCCGGGGTGAAATCCTCCAGCTTAACTGGAGAATAGCCTTGGAATACTGGTGGTCTTG  
AGGGGGGTAGGGGCATGTGGAACCTCCGGTGGAGCGGTGAAATGCGTTGATATTGGAAGG  
AACGCCGTTGGCGAAAGCGAGCTGCTGGACCTCTTCTGACGCTGAGGCGCGAAAGCTAGG  
GGAGCAAACGGGATTAGATAACCCGTGTAGCC

>Otu23680

CAGCCTACGGGGGGCTCCAGTGGGGAATTTTGCGCAATGGGGGAAACCCTGACGCAGTAA  
CGCCGCGTGGAGGATGAAGCCCCCTGGGGCGTAAACTCCTTTCGACCAAGACGATAATGA  
CGGTACTGGTGAAGAAGCACCGGCTAACTCTGTGCCAGCAGCCGCGGTAATACAGAGGG  
TGCGAGCGTTAATCGGAATTACTGGGCGTAAAGGGCGCGTAGGCGGTGCGGTAAGTCACC  
TGTGAAACCTCCGGGCTCAACCCGAGCCTGCAGGCGAAACTGCCGTGCTTGAGGGTGGG  
AGAGGTGCGTGGAATTCCCGGTGTAGCGGTGAAATGCGTAGATATCGGGAGGAACACCTG  
TGGCGAAAGCGGCGCACTGGACCACATCTGACGCTGAGGCGCGAAAGCTAGGGGAGCAA  
CAGGATTAGATAACCCGTGTAGTCC

>Otu23700

CCAGCCTACGGGAGGCTGCAGTGGGGAATATTGGACAATGGGCGAAAGCCTGATCCAGCA

ATGCCGCGTGTGTGAAGAAGGCCTGCGGGTTGTAAAGCACTAGCGAAGGGGAAGAAGGCT  
TTTAGTCGAATAGGCTAAAAGATTGACGGTACCCTGATAAGAAGCACCGGCTAACTCTGT  
GCCAGCAGCCGCGGTAATACAGAGGGTGCAAGCGTTAATCGGAATTACTGGGCGTAAAGC  
GCACGTAGGTGGTTATTTAAGTCGGATGTGAAATCCCTGGGCTTAACCTGGGAATTGCAT  
TTGATACTGTGTAGCTAGAGTATAGTAGAGGAGAGTGGAATTTCCGGTGTAGCGGTGAAA  
TGCGTAGATATCGGAAGGAACACCAGTGGCGAAGGCGACTCTCTGGACTAATACTGACAC  
TGAGGAGCGAAAAGCGTGGGTAGCGAACAGGATTAGATAACCCCGTAGTCC

>Otu23704

CCAGCCTATGGGGGGCACCAGTCGAGGATCTTTTCGCAATGGGCGCAAGCCTGACGAAGCG  
ACGCTGCGTGAGCGATGAAGGCCTTCGGGTCGTAAAGCTCTTTTCGCGCAAGAACAAGGAA  
ATGATGTGAATAACATCGTAACTTGAGGGTACTGCGTAAAGAAGCACCGGCTAACTCCGT  
GCCAGCAGCTGCGGTAATACGGAGAGTGCAAGCATTAATCGGAATTATTGGGCGTAAAGG  
GCGCGTAGGCGGACCAGCCAGTCAGATGTGAAATTCCGAAGCTCAACTTCGGAGCTGCAT  
TTGAAACTATTGGTCTAGAGGGTTGACGGAGAAAACGGAATTCCACGTGTAGCGGTGAAA  
TGCGTAGATATGTGGAGGAACACCGGTGGCGAAAGCGGTTTTCCAGTTAACACCTGACGC  
TGAGGCGCGAGAGCAAGGGGAGCAAACAGGATTAGAAACCCCTCGTAGTCC

>Otu23720

CCAGCCTATGGGGTGCTGCAGTCGAGAATTTTTCTCAATGGGCGAAAGCCTGAAGGAGCG  
ACGCCGCGTGAGGATGAATGGCTTCGGCCCGTAAACTCCTGTCTGTTTGCGAACAAATTA  
ATTCACCCAACACGTGGATTATTGATTGTAGCGGAAGAGGAAGCACCGGCCAACTGTGTG  
CCAGCAGCCGCGGTGATACATAGGGTGCGAGCGTTATTTCGGATTTATTGGGCGTAAAGAG  
CTCGTAGGCGGTTTCGACAAGTCGGGTGTTAAACCCCGAGGCTTAACCTGGGGCCGCCACC  
CGAAACTGTTGTGACTAGAGTTTGGTAGGGGATCACGGAATTCCTGGTGTAGCGGTGGAA  
TGCGCAGATATCAGGAGGAACACCAGTAGCGAAGGCGGTGATCTGGGCCAATACTGACGC  
TGAGGAGCGAAAAGCGTGGGGAGCGAACAGGATTAGAAAACCCGTGTAGTCC

>Otu23722

CCAGCCTATGGGTGGCAGCAGTCGAGAATTTTTCAATGGACGAAAGTCTGATGGAGCG  
ACGCCGCGTGAGGATGAAGGTTTTTCGGATTGTAAACTCCTGTCACTGCAGAACAAGGCT  
ATGCGATTGAACATTTTCGCATAGTTGATGGTATGCGGAGAGGAAGGGACGGCTAACTCTG  
TGCCAGCAGCCGCGGTAATACAGAGGTCTCAAGCGTTGTTTCGGATTTCATTGGGCGTAAAG  
GGTGCCTAGGAGGTTCGGTAAGTCAGGTGTGAAATCTCAGAGCTTAGCTCTGAAACTGCG  
CTTGATACTGCTCGGCTAGAGGATCGGAGGGGGTATCGGAATTTATGGTGTAGCAGTGAA  
ATGCGTAGATATCATAAGGAACACCGGTGGCGAAGGCGGATACCTGGAAGATTCTGACT  
CTGAAACACGAAAGCCAGGGGAGCAAACGGGATTAGAAAACCCCGGTAGTCC

>Otu23736

CCAGCCTATGGGTGGCTCCAGTGGGGAATATTGGACAATGGGGGCAACCCTGATCCAGCC  
ATGCCGCGTGAACGATGAAGGCCTTCGGATTGTAAAGTTCTTTTGACGGGGACGATGATG  
ACGGTACCCGTAGAATAAGCACCGGCTAACTTCGTGCCGGCAGCCGCGGTAATACGAAGG  
GTGCTAGCGTTGTTTCGAATTACTGGGCGTAAAGGGCGCGTAGGCGGCTTGGCAAGTTGG  
GTGTGAAAGCCCAGGGCTCAACCCTGGAATTGCACTCAAGACTGTTTTACTTGAATTCGG  
TAGAGGATGGTGGAAATTCACAGTGTAGAGGTGAAATTCGTAGAGATTGGGAAGAATATCC  
GTGGCGAAGGCGGCCATCTGGACCGACATTGACGCTGAGGCGCGAAAGCGTGGGGAGCAA  
ACAGGATTAGAAAACCCGCGTAGTCC

>Otu23778

CCAGCCTATGGGATGCAGCAGTGGGGAATCTTGCGCAATGGGCGAAAGCTTGACGCAGCA  
ACGCCGCGTGTGTGATGAAGGTCTTCGGATCGTAAAGCACTGTGCGGAGGGACGAGAAGC  
CGAGGGTGAACAATCCTTGGATAGGACGGTACCTCGAGAGGAAGCACCGGCTAACTCTGT  
GCCAGCAGCCGTGGTAATACAGAGGGTGCGAGCGTTGTTTCGGAATTATTGGGCGTAAAGC  
GCTTGTAGGCGGCACGATAAGTCTACTGTGAAAGCCCTTGGCTCAACCGAGGAAGAGCAG  
TAGATACTGTGAGCTTGAATGCCGGAGAGGGTCGCGGAATTCCTGGTGTAGAGGTGAAA  
TTCGTAGATATCGGGAGGAACACCAGTGGCGAAGGCGGCGACCTGGACGATGATTGACGC  
TGAGGCACGGAAGCGTGGGGATCAAACAGGATTAGAGACCCCGTAGTCC

>Otu23781

CCAGCCTACGGGTGGCACCAGTCGAGAATTTTTCAATGAACGAAAGTCTGATGGAGCG  
ACGCCGCGTGAGGATGACGGTCTTCGGATTGTAAACTGCTTTTATATGGGAAGATTATG  
ACGGTACCATATGAATAAGGACCGGCTAACTACGTGCCAGCAGCCGCGGTAATACGTAGG  
GTCCAAGCGTTATCCGGAATCACTGGGCGTAAAGCGTGCGTAGGTGGCGTGTTAAGTGAG  
ATGTTAAATCGTGTGGCTCAACCATATCGATGCATCTCATACTGGCATGCTAGAGGACGG

CAGAGGCAAGTGGAAATTACGAGTGTAGCAGTGAAATGCGTAGATATTCGTAGGAACACCA  
ATGGCGAAGGCAGCTTGCTGGGCCACTCCTGACACTGAGGTACGAAAGCGTGGGGAGCGA  
ACAGGATTAGAGACCCCTTGTAAGTCC

>Otu23800

CCAGCCTACGGGTGGCACCAGTGGGGAATTTTGGACAATGGGGGCAACCCTGATCCAGCC  
ATGCCGCGTGTGTGAAGAAGGCCTTCGGGTGTAAAGCACTTTTGTCCGGAACGAAACGG  
CGGATGCTAATAACATCCGTTAATGACGGTACCGGAAGAATAAGCACCGGCTAACTACGT  
GCCAGCAGCCGCGGTAATACGAGGGGGGCAAGTGTTCGGAATTATTGGGCGTAAAGG  
GAGTGTAGGCGGTTTGGTAAGTTGTGTGTGAAATCTTCAGGCTCAACCTGAAGTCTGCAC  
ACAAAACCTGCCGGGCTTGAGGGTGGGAGAGGTGAGTGGAATTTCCGGTGTAGCGGTGAAA  
TGCGTAGATATCGGAAGGAACACCTGTGGCGAAAGCGGCTCACTGGACCATTCTGACGT  
TGAAACTCGAAAGCTAGGGGAGCAAACAGGATTAGATACCCTAGTAGTCC

>Otu23806

CCAGCCTACGGGGTGCTGCAGTCGAGAATTTTCCCAATGGGCGAAAGCCTGAAGGAGCG  
ACGCCGCGTGGGGGATGAAGGGCTTCGGCTCGTAAACCCCTGTCATTTGCGAACAAACCT  
TGCGTTTTTAACAGATCGCAAGCTGATTGTAGCGAAAGAGGAAGGGACGGCTAACTCTGTG  
CCAGCAGCCGCGGTAATACAGAGGTCTCAAGCGTTGTTTCGGAATTCATTGGGCGTAAAGGG  
TGCGTAGGCGGCGAAGCAAGTCAGGTGTGAAATCCCGGGGCTCAACCCCGGAACCTGCATT  
TGATACTGCTTTGCTTGAGGACTGGAGAGGAGATCGGAATTCACGGTGTAGCAGTGAAAT  
GCGTAGATATCGTGAGGAAGGCCAGTGGCGAAGGCGGATCTCTGGACAGTTCCTGACGCT  
GAGGCACGAAGGCCAGGGGAGCAAACGGGATTAGAAACCCTAGTAGTCC

>Otu23819

CCAGCCTATGGGTTGCAGCAGTAAGGAATTTTGGACAATGGGGGCAACCCTGATCCAGCA  
ACGCCGCGTGAAGGATGACGGCCTTCGGGTGTAAACCTCTTTCAAGCAGGGACGATAAT  
GACGGTACCTGCAGAAGAAGCTCCGGCCAACCTACGTGCCAGCAGCCGCGGTAATACGTAG  
GGAGCGAGCGTTGTCCGGAATCATTGGGCGTAAAGAGCTCGTAGGCGGCTTGGTAAGTCG  
GATGTGAAAGCTCCAGGCTCAACCTGGAGTCGCCATCCGATACTGCCATAGCTAGAGTCC  
GGTAGGGGGCCACGGAACCTCCTGGTGTAGCGGTGAAATGCGCAGATATCAGGAAGAACAC  
CGGTGGCGAAGGCGGTGGGCTGGGCCGGCACTGACGCTGAGGAGCGAAAGCGTGGGGAGC  
GAACAGGATTAGATACCCCTGTAGTCC

>Otu23847

CCAGCCTATGGGGGGCAGCAGTGAGGAATTTTGGGCAATGGAGGAACTTTGACCCAGCG  
AGAATTCCTGCATGACGAATGCGGTAGTTTTCTGTAAAGTGCTTTTAATGGCGAAGATCT  
TGACTGTAGCCGTTTGTAAAGAAGTGCCGGCTAACCTCGTGCCAGCAGCTGCGGTAAGACG  
AGGGGCGCGGGCCTTATTAGTTGTGATTGGGTGTAAAGGGTAAGTAGGCTACTGCCGACA  
ATTCTTAGCAAAAATCGTGGAGAATTCCTATACGACTTGCTACTTAATGTAGAAGCAGTT  
TGAGTTGCGGAGAGGTCTTGGCAATTTTCGTGTGTAGGGGTAAATCCAAGAAGACACGAA  
TGAACATCAGCGGGCGAAGGCTCATTTCCGGCTGCAACTGACGCTCAGGTACGGAAGCTA  
CGGGAGCAAACGGGATTAGAAACCCCGTAGTCC

>Otu23853

CCAGCCTATGGGTGGCTCCAGTAAGGAATATTGGACAATGGGCGAAAGCCTGATCGAGCG  
ACACCGCGTGTAGGATGAAGGCCTTCGGGGTGTAACCTACGGTAGTATGGTAACAATGCA  
AATGAGTGCCATACGGAAGAGGTGGGTAACCTACGTGCCAGCACCAGCGGTGATACGTAG  
ACCTCGAGCGTTATCCGGATTTATTGGGCGTAAAGAGCATGTAGGAGGTTTTGCGCGTCT  
TTTGTTAAATCCCACCGCCCAACGGTGGACCTGCAAGAGATACGGCAGGACTAGAGGGGG  
TTAGAGGTGCATGGAACCTACGGTGTAGGGGTGAAATCCGTTGATATCGTGGGGAAACACC  
AAAGGCGAAGGCAGTGCCTGGGACCTTCCTGACTCTGAGATGCGAAAGCGTGGGGAGCA  
AAAAGGATTAGAGACCCAGTAGTCC

>Otu23858

CCAGCCCACGGGTTGCTGCAGTCGAGAATTTTCTCAATGGGCGAAAGCCTGAAGGAGCG  
ACGCCGCGTGGGGGATGAATGGCTTCGGCCCGTAAACCCCTGTCGTTTGCGAACAAATTG  
CTTCACCTAACATGTGAAGCATTGATAGTAGCGGAAGAGGAAGGGACGGCTAACTCTGTG  
CCAGCAGCCGCGGTAATACAGAGGTCCCAAGCGTTGTTTCGGAATTCATTGGGCGTAAAGGG  
TGCGTAGGTGGTTCGGGTAAGTCTGACGTGAAATCTCCGGGCCTAACCCGGAACCTGCGTT  
GGATACTATCCGGCTAGAGGAATGGAGGGGAGACTGGAATACTTGGTGTAGCAGTGAAAT  
GCGTAGATATCGAGAGGAACACCAGTGGCGAAGGCGAGTCCCTGGACGACTCCTGACACT  
GAGGCACGAAGGCTAGGGGAGCAAACAGGATTAGATACCCCGTAGTCC

>Otu23875

CCAGCCTACGGGAGGCACCAGACGAGAATATTCGACAATGGGCGAAAGCCTGATCGAGCG  
ACGCCGCGTGACTGATGAAGTCCTACGGGACGTAGAGGTCTTTTGTGAGGTAGAAAAGTTA  
TTGATCGCCTCAAGAATAAGGGGTTGCTAAACTCGTGCCAGCAGCAGCGGTAATACGAGT  
GCCCCAAGCGTTGTCCGAATTATTGGGCGTAAAGGGTGTGTAGGCGGCTGTATTAGTCT  
TTTGTAAAGCTCCCGGCTTAACCGGGAAGATGCAAAAGAAACGGTACAACCTAGAGGGTG  
CGAGAGGTGAATGGAACCTAGTGTAGGGGTGAAATCCGTTGATATTATGGGGAACACC  
AAAAGCGTAGGCAATTCCTGACGTTGAGACACGAAAGCGTGGGTAGCG  
AATGGGATTAGATACCCTCGTAGTCC

>Otu23880

CCAGCCTATGGGGTGCTGCAGTAGGGAATATTGCGCAATGGAGGAACTCTGACGCAGCG  
ACGCCGCGTGGGTGACGAAGGCTTTCGGGTCGTAAAGCCCTGTCGGAAGGGAAGAAAAGC  
GATATGGCTAACATCCATATCGCTTGACGGTACCTTCAAAGGAAGCACCAGGCTAACTACG  
TGCCAGCAGCCACGGTAATACGTAGGGTGCTAGCGTTGTTTCGGAATCATTGGGCGTAAAG  
CGCGTGTAGGCGGTTTGGTAAGTCGAGTGTGAAATCCCTGGGCTCAACCGAGGAAGTGCA  
TTCGAAACTACCTGACTAGAAGACGGTAGAGGAAGGTGGAATTCCTAGTGTAGAGGTGAA  
ATTCTAGATATTAGGAGGAATACCGGCGGCGAAGGCGGCTTCTGGACCGATTTTGACG  
CTGAGACGCGAAAGCGTGGGGAGCAAACAGGATTAGAAACCCGAGTAGTCC

>Otu23890

CCAGCCTACGGGGGGCAGCAGTGGGGAATATTGGACAACGGGCGCAAGCCTGATCCAGCC  
ATGCCGCGTGGGTGATGAAGGCCCTAGGGTTGTAAAGCCCTTTCGGCGGGGAAGATAATG  
ACGGTACCCGCGAGAAGAAGCCCCGGCTAACTTCGTGCCAGCAGCCGCGGTAATACGAAGG  
GGGCTAGCGTTGCTCGGAATCACTGGGCGTAAAGCGCACGTAGGCGGCTTTTTAAGTCAG  
GGGTGAAATGCCAAGGCTCAACCTTGAACTGCCTTTGATACTGGAAGCCTCGAGTCCGG  
GAGAGGTGAGTGGAAGTGCAGTGTAGAGGTGAAATTCGTAGATATTCGCAAGAACACCA  
GTGGCGAAGGCGGCTCACTGGCCCGGAAGTACGCTGAGACGCGAAAGCGTGGGGAGCAA  
ACGGGATTAGATACCCTTGTAAGTCC

>Otu23904

CCAGCCTATGGGGGGCAGCAGTGGGGAATTTTGGACAATGGGCAACCCTGATCCAGCAAT  
GCCGCGTGTGTGAAGAAGGCCCTGAGGGTTGTAAAGCACTTTCAGTGGGGAGGAGGATTGT  
TTGTTTAAGAGATGAATGATTGGACGTTACCCACAGAAGAAGCACCGGCTAACTCCGTGC  
CAGCAGCCGCGGTAATACGGAGGGTGCGAGCGTTAATCGGAATTACTGGGCGTAAAGAGT  
GCGTAGGTGGTTAAATAAGTTATGTGTGAAATCCCTGGGCTTAACCTGGGCAGGTCATAT  
AATACTGTTTGACTCGAGTATGGGAGAGGGTAGTGGAATTTCCGGTGTAGCGGTGAAATG  
CGTAGAGATCGGAAGGAACACCAAGTGGCGAAGGCGGCTACCTGGCCTAATACTGACACTG  
AGGCACGAAAGCTAGGGTAGCGAACGGGATTAGAAACCCAGTAGTCC

>Otu23930

CCAGCCTATGGGTTGCTGCAGTTAGGAATCTTGCAGCAATGGGCGAAAGCCTGTGCGAGCC  
ATGCCGCGTGAATGATGAAGGTCTTAGGATTGTAAATTCCTTCAGCGGGGACGATAATG  
ACGGTACCCGCGAGAAGAAGCTCCGGCTAACTTCGTGCCAGCAGCCGCGGTAATACGTAGG  
GTGCAAGCGTTAATCGGAATTACTGGGCGTAAAGCGTGCGCAGGCGGTTTTGCAAGTCAG  
ATGTGAAATCCCCGGGCTTAACCTGGGAACTGCATTTGAGACTGCATGGCTAGAGTATCG  
AAGAGGGAAGTGGAATTTCCGGTGTAGCGGTGAAATGCGTAGATATCGGAAGGAACACCA  
GTGGCGAAAGCGACTTCCTGGTCTGAATACTGACGTTTCATGTGCGAAAGCGTGGGGAGCAA  
ACAGGATTAGATACCCTGGTAGTCC

>Otu23941

CCAGCCTACGGGGGGCTGCAGTGGGGAATATTGGGCAATGGGCGCAAGCCTGACCCAGCC  
ACGCCGCGTGAGTGATGAAGGCCTTCGGGTTGTAAAGCTCTGTGGAGGGGACGAATTCT  
TGAGGGGCTAATATCTCCTTGAGTTGACGGTACCCCTTTAGCAAGCACCAGGCTAACTCCG  
TGCCAGCAGCCGCGGTAATACGGAGGGTGCGAACGTTGCTCGGAATCATTGGGCGTAAAG  
GGCGCGTAGGTGGTTTTGTGCGTCAGATGTGAAAGCCCTGGGCTTAACCCAGGAAGTGCA  
TTTGAACGGCAGAACTAGAGTACCGGAGAGGGTAGCGGAATTCCTGGTGTAGAGGTGAA  
ATTCGTAGAGATCGGGAGGAACACCAAGTGGCGAAGGCGGCTACCTGGACGGATACTGACA  
CTGAGGCGCGAAAGCGTGGGGAGCAAACAGGATTAGATACCCGCGTAGTCC

>Otu23944

CCAGCTATGGGTTGCTGCAGTTGGGAATCTTGCACAATGGGGGAAACCCTGATGCAGCGA  
CGCCGCGTGGAGGATGAAGGGTCTAGGCTCGTAAACTCCTTTTATCGGGAAAGACTTAGG  
ACGGTACCCGATGAATAAGGACCGGCTAACTACGTGCCAGCAGCCGCGGTAAGACGTAGG  
GTCCAAGCGTTGTCCGATTACTGGGCGTAAAGAGCACGTAGGCGGCTCGTTAAGTGTG

AAGTGAATCTCTAGGGCTCAACCCAGAACTGCTTTACATACTGGCGAGCTAGAGGGAT  
GCAGAGGTTTGTGGAATTCCTGGTGTAGCGGTGAAATGCGTAGATATCAGGAGGAACACC  
CATGGCGAAGGCAGCAAACTGGGCATCATCTGACGCTGAGGCGCGAAAGCGTGGGTAGCA  
AACAGGATTAGAGACCCCTGTAGTCC

>Otu23958

CCAGCCTACGGGGGGCAGCAGTGGGGAATATTGGACAATGGGGGCAACCCTGATCCAGCA  
ATGCCGCGTGTGTGAAGAAGGCCTTCGGGTGTAAAGCACTTTAGGTTGGGAAGAAAGGT  
TTGCTGCGAATAGCGGTGAGCTGTGACGTTACCGACAGAATAAGCACTGGCTAACTCTGT  
GCCAGCAGCCGCGGTAATACAGAGAGTGCAAGTGTTAATCGGAATTACTGGGCGTAAAGC  
GCGCGTAGGTGGATATTTAAGTCGGATGTGAAAGCCCCGGGCTTAACCTGGGAACTGCAT  
CCGATACTGGATGTCTAGAGTATGGTAGAGGGAAGTGGAATTTCCGGTGTAGCGGTGAAA  
TGCGTAGATATCGGAAAGAACACCAGTGGCGAAGGCGACTTCCTGGACCAATACTGACAC  
TGAGGCGCGAAAGCGTGGGGAGCAAACAGGATTAGAGACCCCACTAGTCC

>Otu23962

CCAGCCTACGGGTGGCACCAGTCGAGAATTTTTTCAACAATGGGCGCAAGCCTGATGGAGCG  
ACGCCGCGTGGGGGATGAATGGCTTCGGCCCGTAAACCCCTGTCATTTCGGGATCAATGCC  
TGCGATTTAACAGATGGCAGGTTGATAGTACCGGAAGAGGAAGGGACGGCTAACTCTGTG  
CCAGCAGCCGCGGTAATACAGAGGTCCCAAGCGTTGTTTCGGATTTACTGGGCGTAAAGGG  
TGCGTAGGTGGTGGGTAAGTTTGATGTGAAATCTCCGGGCTTAACCCGAAAATGCATT  
GAATACTATCCAGCTTGAGGATTGGAGGGGGGACTGGAATGCTCGGTGTAGCAGTGAAAT  
GCGTAGATATCGAGCGGAACACCAGTGGCGAAGGCGAGTCCCTAGACAATTCCTGACACT  
GAGGCACGAAAGCCAGGGGAGCAAACGGGATTAGAGACCCCTAGTAGTCC

>Otu23970

CAGCCTATGGGACGCACCAGTGGGGAATATTGGACAATGGGCGCAAGCCTGATCCAGCCA  
TGCCGCGTGAGTGATGACGGCCTTAGGGTTGTAAAGCTCTGTTCGGCGGGGACGAAAAAG  
AGTGTAATGCGCTCTATTGACGGTACCCGCAAAGGAAGCACCAGGCTAACTCTGTGCCAGC  
AGCCGCGGTAATACAGAGGGTGCAAGCGTTGTTTCGGAATTACTGGGCGTAAAGCAGCGTGT  
AGGCGGTTTTTGTAAAGTCGCATGTGAAAGCCCTTGGCTCAACTAAGGAAGCGCATGCGATA  
CTGCGAGACTTGAGTGTTGGAGGGGGTGGCGGGATTCCCGGTGTAGAGGTGAAATTCGTA  
GATATCGGGAGGAACACCTGTGGCGAAGGCGGCCACCTGGACGACAACTGACGCTGAGAC  
GCGAAAGCGTGGGTAGCAAACAGGATTAGAAACCCGCGTAGTCC

>Otu23975

CCAGCCTATGGGGGGCAGCAGTAGGGAATTTTCCACAATGGGCGAGAGCCTGATGGAGCA  
ATACCGCGTGATGGATGAAGGCTCTAGGGTCGTAAACATCTTTTATCTGTGACGAATATG  
ACGGTAGCAGATGAATAAGGATCGGCTAACTACGTGCCAGCAGCCGCGGTCATACGTAGG  
ATCCAAGCGTTATCCGGATTTACTGGGCGTAAAGAGTTGCGTAGGTGGCAGAGTAAGTAA  
ATAGTGAAATCCTGGGGCTCAACCCCTTCAACATTGTTTAACTGCTCAGCTTGAGAGTG  
AGAGAGGTAGATGGAATTGCTAGTGTAGGAGTGAAATCCGTAGATATTAGCAGGAACACC  
GATGGCGTAGGCAGTCTACTGGCTCATTTCTGGCACTAAGGCACGAAAGCGTGGGGAGCA  
AACGGGATTAGAAACCCTCGTAGTCC

>Otu23987

CGCCTACGGGTGGCAGCAGTTTCGAATCATTCACAATGGGCGAAAGCCTGATGGTGCGAC  
GCCGCGTGGGGGATGAAGGTCCTTGATTGTAAACCCCTGTCACCGGGGAAGAATGGCGT  
ACACCTAACACGTGTACGTTTGACTTAACCCGGAGAGGAAGCAGTGGCTAACTCTGTGCC  
AGCAGCCGCGGTAATACAGAGACTGCAAGCGTTATTTCGGATTCACTGGGCGTAAAGGGTG  
CGCAGGAGGTGATGTGTGTTAGGCGTGAAATCTCGAGGCTCAACCTCGAAACTGCACCTA  
AACTATATCACTAGAGTACTGGAGAGGGTAGCGGAATTCACGGTGTAGCAGTGAAATGC  
GTAGATATCGTGAGGAACACCAAAGGCGAAGGCAGCTACCTGGACAGTTACTGACTCTCA  
GGCACGAAAGCGTGGGGAGCCAAAGGGATTAGATACCCGTGTAGTCC

>Otu24007

CCAGCCTACGGGATGCTGCAGTGGGGAATATTGGACAATGGGCGAAAGCCTGATCCAGCC  
ATGCCGCGTGAGTGATGAAGGCCTTAGGGTTGTAAAGCTCTTTCGGCGGGGACGATAATG  
ACGGTACCCGCGAGAAGAAGCCCCGGCTAACTTCGTGCCAGCAGCCGCGGTAATACGAAGG  
GGGCTAGCATTGTTTCGGAATTACTGGGCGTAAAGCGTATGTAGGCGGATCGTCAAGTCGG  
GGGTGAAATCCCGAGGCTCAACCTCGGAACTGCCTTCGATACTGGCGATCTTCGAGTCCG  
GGAGAGGTGAGTGGAATCCGAGTGTAGAGGTGAAATTCGTAGATATTTCGGAAGAACACC  
AGTGGCGAAGGCGGCTCACTGGCCCGGTACTGACGCTGAAATACGAAAGCGTGGGGAGCA  
AACAGGATTAGAAACCCCGTAGTCC

>Otu24008

CCAGCCTACGGGGGGCAGCAGCTAAGAATCTTCCGCAATGGGCGAAAGCCTGACGGAGCG  
ATGCCGCGTGATCGATGAAGGTCGAGAGATTGTAAAGATCTTTTCCAGGTGAGGAATAAG  
GGGAGGAGGGAATGCCTCTCTGATGACGTTAACCTGGGAATAAGCCCCGGCTAATTACGT  
GCCAGCAGCCGCGGTAACACGTAAGGGGCGAGCGTTGTTTCGGAATTATTGGGCGTAAAGG  
GCACGCAGGCGGCCTGACAAGTCTGATGTGAAAAACCTGGGCTTAACCTCAGGGGGCGCGT  
TGGAAACTGTCAAGCTAGAGTGTAGAGGGGGAGTCGGAATTCCTAGTGTAGGGGTGAAA  
TCTGTTGATATTAGGAAGAACACCGGTGGCGAAGGCGGACTCCTGGCTAAATACTGACGC  
TGAGGTGCGAAAGCATAGGGAGCAAACAGGATTAGAAACCCCCGTAGTCC

>Otu24013

CCAGCCTACGGGTCGCGAGCAGTGGGGAATTTTCCGCAATGGGCGAAAGCCTGACGGAGCA  
ACGCCGCGTGAGGGAGGAAGGCTCTTGGGTGTAAACCTCTTTTCTCAGGGAAGAACA  
ATGACGGTACCTGAGGAATCAGCATCGGCTAACTCCGTGCCAGCAGCCGCGGTAAGACGG  
AGGATGCAAGCGTTATCCGGAATTATTGGGCGTAAAGCGTCCGCAGGTGGCCAACCAAGT  
CTGTCTGTCAAAAGACCGGGGCTTAACCTCTGGAAAGGCGATGGAAACTGGTAGGCTAGAGAG  
TGGTAGGGGCGAGAGGGAATTCCTGGTGTAGCGGTGAAATGCGTAGAGATCGGGAAGAACA  
CCGGTGGCGAAGGCGCTCTGCTGGACCACAACCTGACACTCAGGGACGAAAGCTAGGGGAG  
CGAAGGGGATTAGAGACCCCTCGTAGTCC

>Otu24057

CGCCTATGGGTGGCTGCAGTCGAGAATTTTTCACAATGGGGGAAACCCCTGATGGAGCGAC  
GCCGCGTGGGGGATGAATGGCTTCGGCCCGTAAACCCCTGTCATTTGCGAACAAACCTTT  
GCGTATAACACATGCAACGTTGATAGTAGCGGAAGAGGAAGGGACGGCTAACTCTGTGCC  
AGCAGCCGCGGTAATACAGAGGTCCCAAGCGTTGTTTCGGATTCCTGGGCGTAAAGGGTG  
CGTAGGTGGCTTGGTAACTCTGATGTGAAATCTCGGAGCTCAACTCCGAAACTGCATTGG  
ATACTATTAAGCTGGAGGGTCGGAAGGGGGACTGGAATTCTCGGTGTAGCAGTGAAATGC  
GTAGATATCGAGAGGAACACCAGTGGCGAAGGCGAGTCCCTGGACGACTCCTGACACTGA  
GGCACGAAAGCTAGGGGAGCAAACAGGATTAGATACCCCCGTAGTCC

>Otu24064

CCAGCCTATGGGGTGCAGCAGTGGGGAATATTGGACAATGGGGGAAACCCCTGATGCAGCG  
ACGCCGCGTGAGGATGAAGGGTCTAGGCCCTGTAAACTCCTTTTATCGGGAAAGACTTAG  
GACGGTACCTGGGGAATAAGCACCGGCCAACTACGTGCCAGCAGCCGCGGTAAGACGTAG  
GGTGAAGCGTTGTCCGGATTTACTGGGCGTAAAGCGCGCTAGGCGGCTCGTTGAGTGT  
GAAGTGAAATCCCGTGGCTCAACTACGGAAGTCTTCGCATACTGGCGGGCTTGAGGGAT  
GCAGAGGTCTGTGGAATTCCTGGTGTAAACGGTGAAATGTGTTGATATCAGGAGGAACACC  
CATGGCGAAGGCAGCAGACTGGGCATTTCTGACGCCGAGGCGCGAAAGCGTGGGTAGCA  
AACAGGATTAGAGACCCCCGTAGTCC

>Otu24076

CCAGCCTATGGGTTGCTGCAGTGGGGAATCTTGCGCAATGGACGAAAGTCTGACGCAGCC  
ACGCCGCGTGAGTGATGAAGGCCTTCGGGTGTAAACTCTGTGGGGCGAGACGAATAAG  
TGCAGCCTAATACGTTGCATGATGACGGTATCGCCTTAGCAAGCACCGGCTAACTCTGTG  
CCAGCAGCCGCGGTAAGACAGAGGGTGCAAACGTTGTTTCGGAATTACTGGGCGTAAAGCG  
AGTGTAGGCGGTTTCCTAAGTCGGATGTGAAAGCCCCGGGCTCAACCCGGGAAGTGCATT  
CGAAACTGGGAAGCTAGAGTATCGGAGAGGTTGGTGGAATTCTCGGTGTATAGGTGAAAT  
TCGTAGATATCGAGAGGAACACCGGTGGCGAAGGCGGCCAACTGGACGAATACTGACGCT  
GAGACTCGAAAGCGTGGGGAGCAAGCAGGATTAGAGACCCCTGTAGTCC

>Otu24080

CCAGCTATGGGGCGCTCCAGTGGGGAATCTTACACAATGGGGGAAACCCCTGATGCAGCGA  
CGCCGCGTGGGTGATGAAGCCCTTCGGAGTGTAAGCCCTTTCGGCAGGGAAGAGTAAAG  
ACGGTACCTGCAAAAGAAGCCCCGGCTAACTACGTGCCAGCAGCCGCGGTAATACGTAGG  
GGGCAAGCGTTGTTTCGGAATTACTGGGCGTAAAGAGCGCGTAGGCGGCGCAGTGTGTTTG  
GTGTGAAATCTCCCGGCTCAACCGGGAGGGGCCATCGAAAACCTGCTGTGCTTCGGGTACG  
GGAGAGGGGAGTGGAATTCCTGGTGTAGCGGTGAAATGCGTAGAGATCGGGAGGAACACC  
AGCGACGAAGGTGGCTCCCTGGACCGTTACCGACGCTGAGGCGCGAAAGCTAGGGGAGCA  
AACAGGATTAGATACCCCCGTAGTCC

>Otu24084

CCAGCCTACGGGGGGGCTCCAGTCAAGAACTTTCCACAATGGACGAAAGTCTGATGGAGCG  
ACGCCGCGTGATTGAAGAAGTGGTTCCGCCAGTAAAGATCTTTTACGAGGGAAGAAGTTT  
ATTGACGGTACCTCATGAATAAGGGGCTCCTAACTCCGTGCCAGCAGGAGCGGTAATACA

GAGGCCCCGAGCGTTATCCGGAATCATTGGGCGTAAAGGGTGTGTAGGTGGCGTTGTTAG  
TCGTTTGTGAAAAGCTCGAGGCTCAACCTCGAATCCGCGAACGAAACGGCAATGCTTGAGT  
ATGTGAGAGGTAAGCGGAACCTCAAGGTGTAGGGGTGAAATCCGTTGATATCTTGGGGAAC  
ACCAAAAGCGAAGGCAGCTTACTGGCACATTACTGACACTGAAACACGAAAGCGTGGGTA  
GCGAATGGGATTAGATACCCCTGTAGTCA

>Otu24093

CCAGCCTATGGGGGGCACCAGTGGGGAATTTTGC GCAATGGGGGAAACCCTGACGCAGCG  
ACGCCGCGTGTGTGAAGAAGGCCTGCGGGTTGTAAAGCACTTTTAGTGGGGACAAAAAGC  
TACGGATTAATACTTCGTGGTCTTGATTTAACCCAAAGAAAAAGCACCGGCTAACTCTGT  
GCCAGCAGCCGCGGTAATACAGAGGTCCCAAGCGTTGTTCCGATTCACTGGGCGTAAAGG  
GTGCGTAGGCGGTCGGGTAAGTCTGACGTGAAATCTCCGGGCCTAACCCGGAAACTGCGT  
CGGATACTATCCGGCTAGAGGATTGGAAGGGAGACTGGAATACTTGGTGTAGCAGTGAAA  
TGCGTAGATATCAAGTGGAACACCAGTGGCGAAGGCGAGTCTCTGGACAATTCCTGACGC  
TGAGGCACGAAAGCCAGGGGAGCAAACGGGATTAGAAACCCTGGTAGTCC

>Otu24094

CCAGCCAATGGGGGGCAGCAGTGGGGAATATTGGACAATGGGGGAAACCCTGATCCAGCC  
ATGCCGCGTGAATGATGAAGGCCTTCGGGTTGAAAAGTTCTTTTGACGGGGACGATGATG  
ACGGTACCCGTAGAATAAGCTCCGGCTAACTTCGTGCCAGCAGCCGCGGTAATACGAAGG  
GAGCTAGCGTTGTTCCGAATTACTGGGCGTAAAGGGCGCGTAGGCGGTTAATAAGTCGG  
GCGTGAAAGCCCTGGGCTCAACCCGGGAACTGCACTCGATACTATTTTACTTGAATTCGG  
TAGAGGTTGGTAGAATTCCCAGTGTAGAGGTGAAATTCGTAGATATTGGGAAGAATACCG  
GTGGCGAAGGCGGCCAACTGGACCGACATTGACGCTGAGGCGCGAAAGCGTGGGGATCAA  
ACAGGATTAGATACCCTCGTAGTCC

>Otu24095

CCAGCCTACGGGACGCTGCAGGACCGGGGGCATGTGCTGCTCTTCCAGCCCAGCGCGGCC  
GAAGTGCACCGGCAGGCCGGGGCGTGGTTTCGACGACGTCGAGATCTACCAGTGGTTTGCC  
GCCAACCTGCACCGGGTGC GCGAGCCGTCGCTGCGGCATTACGTGCGGGCGAAAGAGCTC  
AAGGCTGCCGGAATGGATTGGACCGAGGTCTTGGCGGTGAGGCTGAGAACAAACGCGAG  
CGTCTCGCCGCCGAGCTGCTGGCCAATACTGCATACGGGAGCGTGGCGGCGCGGGTCAAG  
GCTTTCGTGGAACAAGGAGGAGGGTGCCGGGCAACGTTCTTCAACTACCGCCGCAAGTTC  
GGCGGCGGGAATCGGAGGGGTAATGGAGCTGGATAGCCAGCAAGACACTGGAACAAGCTC  
GCTGGGTTTCGAAGGCTGATTAGAGACCCGAGTAGTCC

>Otu24098

CCAGCCTAAGGGGTGCTCCAGTGGGGAATATTGGACAATGGGCGCAAGCCTGATCCAGCA  
ATGCCGCGTGAGTGATGAAGGCCTTAGGGTTGTAAAGCTCTTTCGGCGGGGACGATGATG  
ACGGTACCCGCGAGAAGAAGCCCCGGCTAACTTCGTGCCAGCAGCCGCGGTAATACGAAGG  
GGGCTAGCGTTGTTCCGAATTATTGGGCGTAAAGGGCGCGTAGGCGGCGCGACAAGTCAC  
CTGTGAAATCTCCGGGCTCAACTCGGAGCCTGCAGGCGAAACTGTGCTGCTGGAGTATGG  
GAGAGGTGCGTGGAATTCCTGGTGTAGCGGTGAAATGCGTAGATATCGGGAGGAACACCT  
GTGGCGAAAGCGGCGCACTGGACCATAACTGACGCTGAGGCACGAAAGCCAGGGGAGCAA  
ACGGGATTAGATACCCCAAGTAGTCC

>Otu24111

CCAGCCTACGGGTTGCAGCAGTAGAGAATATTGCATAATGGGCGAAAGCCTGATGCAGCA  
ACGCCGCGTGTGCGATGAAGGCCTTCGGGTCGTAAAGCACTTTTAGAGAGGATGAGGAAG  
GACAGTACTCTCTGAATAAGCCTCGGCTAACTACGTGCCAGCAGCCGCGGTAAAACGTAG  
GAGGCGAGCGTTATCCGGATTTACTGGGCGTAAAGCGCGTGCAGGTGGTTTGTTAAGTTG  
GATGTGAAAGCTCCTGGCTTAACTGGGAGAGGTCGTTCAATACTACCAGACTTGAGTGTG  
GAAGAGGGAGGTGGAATTCCTGGGTGTAGTGGTGAATGCGTAGATATCCGGAGGAACACC  
AGTGGCGAAAGCGGCCTCCTGGTCCATAACTGACACTCATACGCGAAAGCTAGGGGAGCG  
AACGGGATTAGATACCCTGGTAGTCC

>Otu24117

CCAGCCTATGGGGTGCACCAGTGAGGAATATTGCACAATGGGCGAAAGCCTGATGCAGCA  
ACGCCGCGTGAGGGACGAAGGCCCTCGGGTCGTAAACCTCTTTTCTGAGGGACGAGACAA  
GGACGGTACCTCAGGAATAAGTCTCGGCTAACTACGTGCCAGCAGCCGCGGTAAAACGTA  
GGAGGCGAGCGTTATCCGGATTTACTGGGCGTAAAGCGTACGCAGGCGGCTTCGTTAGTC  
GGATGTTAAAGCTCCTGGCTTAACTGGGAGAGGCCATTTCGATACTGCGGGGCTTGAGGTT  
GGGAGAGGGGTATGGAATTCCTGGGTGTAGTGGTGAATGCGTAGATATCGGGAGGAACAC  
CAGTGGCGAAGGCGGTACCCTGGCCACACCTGACGCTGATGTACGAAAGCGTGGGTAGC



AAACAGGATTAGAAACCCCCGTAGTCC

>Otu24136

CCGCCTACGGGTTGCTGCAGTTGGGAATCTTGGACAATGGGGGAGACCCTGATCCAGCCA  
TGCCGCGTGAGTGATGAAGGCCTTCGGGTTGTAAACTCTTTCGACGGGGACGATAATGA  
CGGTACCCGTAGAAGAAGCTCCGGCTAACTTCGTGCCAGCAGCCGCGGTAATACGAAGGG  
GGCTAGCGTTGTTTCGGAATTACTGGGCGTAAAGCGCGCGCAGGCTGTCTTCCAAGTCAGT  
GGTGAAGCCCGGAGCTCAACTCCGGAATTGCCATTGAAACTGTGAGACTGGAGTACGAG  
AGAGGTGAGTGGAAGTGCAGTGTAGAGGTGAAATTCGTAGATATTCGCAAGAACACCAG  
TGGCGAAGGCGGCTCACTGGCCCGGTACTGACGCTGAGGTGCGAAAGCGTGGGGAGCAAA  
CAGGATTAGAAACCCCCGTAGTCC

>Otu24142

CCAGCCTACGGGTCGCACCAGTCGAGGATCTTCGTCAATGGGCGCAAGCCTGAACGAGCG  
ACGCCGCGTGTCGATGAAGGCCTTCGGGTTGTAAAGCACTGTGAGGGGGGATCAAGGTG  
CGCAAGTGCTTGATTGATCCCTGGAGGAAGCACGGGCTAAGTTCGTGCCAGCAGCCGCGG  
TAAGACGAACCGTGCGAACGTTGTTTCGGAATCACTGGGCTTAAAGGGCGCGTAGGCGGCA  
GGCGAGGTGCGGGGTGAAATCCACAGCTTAACTGTGGAAGAGCCTCCGATACCGGTTTG  
CTAGAGGAGGGTAGGGGTGCGCGGAACCTTCTGGTGGAGCGGTGAAATGCGTTGATGTCAG  
AAGGAACGCCGCGGCGGCGAAAGCGGCGCACTGGATCCTTACTGACGCTGAGGCGCGAAAGC  
CAGGGGAGCAAAACGGGATTAGAAACCCCTTGTAGTCC

>Otu24151

CCAGCCTATGGGGCGCAGCAGTCAAGAACATTCGACAATGGGCGAAAGCCTGATCGAGCG  
ACGCCGCGTGTCAGGAAGAAGCTCTTCGGAGCGTAAACTGCTTTTGCTAGGGAAAACTTT  
GATTGTACCTAGAGAATAAGGGGTTGCTAACCTCGTGCCAGCAGCAGCGGTAATACGAGG  
ACCCCGAGCGTTATCCGGAATTACTGGGCGTAAAGCGTGAGCATCCGGTTGTGCTAGTCT  
CATGTTAAATCTCATTGCTCAACGATGAGACCGCGTGAGAAACGGCACGACTAGAGCGGG  
TAAGAGGCAAGCGGAACGTCAGTGTAGGGGTGAAATCCATTGATATTGCACGGAACACC  
AAAAGCGAAAGCAGCTTGCTAGTGCTCTGCTGACGGTCAATCACGAAAGCGTGGGGATCA  
AAAAGGATTAGAAACCCAGTAGTCC

>Otu24153

CCAGCCTACGGGTGGCAGCAGCGGGGAATATTGGACAATGGGCGCAAGCCTGATCCAGCC  
ATGCCGCGTGAGTGATGACGGCCTTAGGGTCGTAAAGCTCTGTGGGGAGGGACGAACCGC  
CGGGTATTAATACCATCCGGCATGACGGTACCTCCTTAGCAAGCACCGGCTAACTTCGTG  
CCAGCAGCCGCGGTAATACGAAGGGTGCAAACGTTGCTCGGAATTATTGGGCGTAAAGCG  
CACGTAGGCGGCTTTGCAAGTCGGATGTGAAATCCCTCGGCTTAACCAAGGAAGTGCATC  
CGAAACTGCAGAGCTTGAGTACTTAAGAGGATCGCGGAATTCCCGGTGTAGAGGTGAGAT  
TCGTAGATATCGGGAGGAACACCAGTGGCGAAGGCGGCGATCTGGGAAGATACTGACGCT  
GAGGTGCGAAAGCGTGGGGAGCAAACAGGATTTGATACCCGTGTAGTCC

>Otu24156

CCAGCCTACGGGTCGCTGCAGTGGGGAATATTGGACAATGGGCGAAAGCCTGATCCAGCA  
ATGCCGCGTGAGTGATGAAGGCCTTCGGGTTGTAAAGCTCTTTCGCACGCGACGATGATG  
ACGGTAGCGTGAGAAGAAGCCCCGGCTAACTTCGTGCCAGCAGCCGCGGTAATACGAAGG  
GGGCTAGCGTTGTTTCGGAATTACTGGGCGTAAAGGGCGTGAGGCGGCGCATCAAGTCAG  
GCGTGAAAGCCCCGGGCTTAACCTGGGAATTGCGCTTGAGACTGGTGTGCTTGGGTTTCGG  
GAGAGGTGAGTGGAATTTCCAGTGTAGAGGTGAAATTCGTAGATATTGGGAAGAACACCA  
GTGGCGAAGGCGGCCAACTGGCCCGACACTGACGCTCATGTGCGAAAGCGTGGGGAGCAA  
ACAGGATTAGAGACCCAGTAGTCC

>Otu24157

CCAGCCTATGGGGGGCTGCAGTAGGGAATATTGGTAATGGGCGCAAGCCTGAACCAGCAA  
CGCCGCGTGTCGATGAAGGCCTTCGGGTTGTAAAGCACTTTTCACTCGGATGAGGAAGG  
ACAGTACGGGTGGAATAAGCTTCGGCTAACTACGTGCCAGCAGCCGCGGTAAACGTTAGG  
AAGCGAGCGTTATCCGGATTTACTGGGCGTAAAGCGCATGCAGGCGGTTTGGAAAGTTGG  
ATGTGAAAGCTCCTGGCTTAACTGGGAGAGGTGCTTCAATACTTCCAGACTAGAGGATGT  
GAGAGGAAAGTGAAATTTCCGAGTGTAGTGGTGAAATGCGTAGATATTCCGAGGAACACCA  
GTGGCGAAGGCGGCTTTCTGGCACATATCTGACGCTCATATGCGAAAGCTAGGGTAGCAA  
ACGGGATTAGAAACCCGCGTAGTCC

>Otu24192

CCAGCCTATGGGATGCTCCAGTGGGGAATATTGGACAATGGGCGCAAGCCTGATCCAGCA  
ATGCCGCGTGAGTGATGAAGGCCTTAAGGTTGTAAACTCTTTCGCCGGGGAAGATAATG

ACGGTACCCGGAAAAGAAGCACCGGCTAACTTCGTGCCAGCAGCCGCGGTAAATACAAAGG  
GTGCTAGCGTTGTTTCGGAATTACTGGGCGTAAAGCGCGCGTAGGCTGTCTTGCAAGTTGG  
AGGTGAAATCCCAGGGCTTAACCCTGGAAGTGCCTTCAAACTGCGAGGCTAGAGTGTGG  
GAGAGGTAAGTGGAATTCGAGTGTAGAGGTGAAATTCGTAGATATTCGGAAGAACACCA  
GTGGCGAAGGCGGCTTACTGGACCATTTCTGACGCTGAGGCGCGAAAGCGTGGGGAGCAA  
ACAGGATTAGAAACCCGCGTAGTCC

>Otu24208

CCAGCCTATGGGGGGCAGCAGCAACGAATCTTCCGCAATGGGCGCAAGCCTGACGGAGCA  
ATGCCGCGTGCGGGATGAAGTACCTCTGGTATGTAAACCGCTGTCAGGGGACAGAACCAA  
TGATTGTCCCCAAAGGAAGTGGCGACTAACTCTGTGCCAGCAGTCGCGGTAATACAGAGG  
CCACAAGCGTTAGTCGGAATTACTGGGCTTAAAGGGTGCGTAGGCGGGCTCGCAAGCGTT  
TTGTGAAAGCCTCCGGCTCAACCGGAGAACAGCAGAGCGAACTGCGAGTCTTGAAGGAAC  
TAGGGGCTGACAGAACAGTCGGTGGAGCGGTGAAATGCGTAGAGATCGACTGGAATGCCG  
ATGGCGAAGGCGGTGAGCTGGGGTTTTCTTGACGCTGAGGCACGAAAGCGTGGGGAGCAA  
ACAGGATTAGAGACCCCAGTAGTCC

>Otu24229

CCAGCCTATGGGTGCGCTGCAGTGGGGAATCTTGACAATGGAGGAAACTCTGATGCAGCG  
ACGCCGCGTGAGTGATGAAGCCCTTCGGGGTGTAAGCTCTTTCGACGGGAACGATAATG  
ACAGTACCCGAAGAAGAAGCTGCGGCTAACTACGTGCCAGCAGCCGCGGTAATACGTAGG  
CAGCAAGCGTTGTTTCGGAATTACTGGGCGTAAAGAGTGTGTAGGCGGTGTCGCAAGTCTG  
TCGTGAAATCTCCCGGCTTAACTGGGAGGGTGCGGCGGATACTGCGATGCTAGAGGGTGG  
GAGAGGTAAGCGGAATTCCTGGTGTAGCGGTGAAATGCGTAGATATCAGGAGGAACACCT  
GTGGTGTAGACAGCTTGCTGGACCACTTCTGACGCTGAGGCACGAAAGCGTGGGTAGCAA  
ACAGGATTAGAAACTGTAGTCC

>Otu24280

CCAGCCTACGGGTGGCAGCAGTGAGGAATATTGGTCAATGGGCGGAAGCCTGAACCAGCC  
ATCCCGCGTGCGAGGAAGAAGGCGCTATGCGTCGTAAACTGCTTTTCCGGGGGAAGAATAA  
GGGCGATGCGTCGCCCCGATGCCGGTACCCCGGGAATAAGGATCGGCTAACTCCGTGCCAG  
CAGCCGCGGTAATACGGAGGATCCGAGCGTTATCCGGATTTACTGGGTTTAAAGGGTGCG  
TAGGCGGGCCCCCTAAGTCAGCGGTGAAAGTCTGCGGCTCAACCGTAGGATTGCCGTTGAT  
ACTGGGGGCCCTTGATTTCGGTCGAGGCGGGCGGAATGCGACATGTAGCGGTGAAATGCTT  
AGATATGTGCGAGAACCGCGATTGCGAAGGCAGCTCGCCGGGCCGTTATCGACGCTGAGG  
CACGAAAGCGTGGGGATCGAACAGGATTAGAGACCCGAGTAGTC

>Otu24293

CCAGCCTATGGGGTGCAGCAGTAGGGAATTTTTCGCAATGGACGAAAGTCTGACGCAGCA  
ACGCCGTGTGAGCGATGAAGGTCTTCGGATTGTAAAGCTCTGTCAGGAGGGAAGAACTA  
TCCGGTTAATACCCGGGTACTGACTGTACCTCCAGAGGAAGCTCCGGCTAACTTCGTGCC  
AGCAGCCGCGGTAATACGAGGGGAGCGAGTGTGTTTCGGATTTATTGGGCGTAAAGGGAG  
TGTAGGCGGGAATCTAAGTCAGAGGTGTAATTCAGGGCTCAACCCTGGGCTTGCCCTTG  
AGACTGGGTTTCTTGAGTATGGAAGAGGGCGATGGAATTCCTGGTGTAGCGGTGGAGTGC  
GTAGATATCAGGAGGAACACCAATAGCGAAGGCAGTCGCCTGGGACAATACTGACGCTGA  
AACTCGAAAGCGTGGGGAGCAAACGGGATTAGAAACCCCTCGTAGTCC

>Otu24313

CCAGCCTATGGGTGGCAGCAGTAAGGAATATTGGACAATGCTCGCAAGAGTGATCCAGCC  
ATGCCGCGTGCGAGGAAGACGGCCCTATGGGTTGTAAACTGCTTTTGAAGTAGAGAAAACC  
CTCCTACGTGTAGGAGGCTGATAGTATAGTTAGAATAAGCATCGGCTAACTTCGTGCCAG  
CAGCCGCGGTAATACGAAGGATGCAAGCGTTATCCGGATTTATTGGGTTTAAAGGGTGCG  
TAGGCGGACTTATAAGTCAGTGGTGAAATCTCGTCGCTTAACGACGAACGTGCCATTGAT  
ACTGTAGGTCTTGAGTACAGATGCCGTTGGCGGAATGTGTGTCATGTAGCGGTGAAATGCAT  
AGATATGACACAGAACACCGATTGCGAAGGCAGCTCACAAAGCTGTAAGTACACTGAGG  
CTCGAAAGTGCGGGGATCAAACAGGATTAGAACCCCGTAGTCC

>Otu24317

CCAGCCTATGGGGTGCAGCAGGCGCGAAACCTTTACAATGCTGGCAACAGCGATAAGGGG  
ACCTCGAGTGCTACGATACAACTCGTGGCTGTCTAGTTGCCTAAAAAGCAATTGATAGCAA  
GGGCCGGGCAAGACCGGTGCCAGCCGCCGCGGTAATACCGACGGCTCGAGTGGTGGCCAC  
TATTACTGGGCTTAAAGCGTTCGTAGCTGGTTTGTTAAGTCTCTGGGGAAATCTTCCGGC  
TTAACCGGAAGGCGTCTCAGGGATACTGGCAGACTAGGGACCGGGAGAGGTGAGGGGTAC  
TCCAGGGGTAGGAGTGAAATCCTGTAATCCTTGGGGGACCACCTGTGGCGAAGGCGCCTC

ACCAGAACGGCTCCGACAGTGAGGGACGAAAGCTGGGGGAGCAAACCGGATTAGAAAACCC  
TTGTAGTCC  
>Otu24321  
CCAGCCTACGGGAGGCAGCAGTCGAGGATCTTCGGCAATGGGCGCAAGCCTGACCGAGCG  
ACGCCGCGTGAGACGATGAAGGCCTTCGGGTGTAAAGTCCTTTAGTGGGGGAGAAAAGGG  
CAACCTTGATCTATCCCAAGAATAAGCACGGGCTAAGTTCGTGCCAGCAGCCGCGGTAAG  
ACGAACCGTGCGAACGTTGTTTCGGAATCACTGGGCTTAAAGGGCGCGTAGGCGGTCTGCC  
AAGTCCGGGGTGAAAGCCTCCAGCTCAACTGGAGAAGTGCCTTGGATACTGGCGAACTCG  
AGCGAGATAGGGGTCGTGGGAACCTCCGGTGGAGCGGTGAAATGCGTTGATATCGGAAGG  
AACGCCGCTGGCGAAAGCGCACGACTGGATCTCTTCTGACGCTGAGGCGCGAAAGCCAGG  
GGAGCAAACGGGATTAGAGACCCGTGTAGTCC  
>Otu24349  
CCAGCCTATGGGGCGCTCCAGTCGAGAATTTTTTCACAATGGGGGAAACCCCTGATGGAGCG  
ACGCCGCGTGGGGGATGAATGGCTTCGGCCCGTAAACCCCTATCATTTGCGAACAAACTT  
TACGCATGAATAATACGTGAATTGATTGTAGCGGAAGAGGAAGGGACGGCTAACTCTGTG  
CCAGCAGCCGCGGTAATACAGAGGTCCCAAGCGTTGTTTCGGATTCACTGGGCGTAAAGGG  
TGCGTAGGTGGTCGGGTAAGTCTGATGTGAAAGCTCGGAGCTCAACTCCGAAATGGCATT  
GGATACTATCCGGCTAGAGGATCGGAGGGGGGACTGGAATTCCTTGGTGTAGCAGTGAAT  
GCGTAGATATCAAGTGGAACACCAGTGGCGAAGGCGAGTCTCTGGACATTTCTTGACGCT  
GAGGCACGAAAGCCGGGGGAGCAAACAGGATTAGAAACCCCTGTAGTCC  
>Otu24354  
CCAGCCTATGGGTGGCTCCAGTCGAGAATTTTTCTCAATGGGCGAAAGCCTGAAGGAGCG  
ACGCCGCGTGAGGGATGAAGGCTTCGGATTGTAAACCTCTGTGCAACAAGACGAAAGCT  
TATCAGTGAACAATTGATAAGTTTGACGGTACTGTTGGAGGAAGCTATGGCTAACTCTGT  
GCCAGCAGCCGCGGTAATACAGAGGTAGCGAGCGTTGTCCGGAATTACTGGGCGTAAAGG  
GCGTGTAGGCGGCTAGGTAAGTCTAGTGTAAACTCTCAGCCTAACTGAGAGATGTCTC  
TGGATACTACCTGGCTTGAGGACAGTAGAGGAGAGTGGAAATCCCGGTGTAGCGGTGAAA  
TGCGTAGATATCGGGAGGAACACCTGTGGCGAAGGCGGCTCTCTGGTCTGTTTCTGACGC  
TGAGGCGCGAAAGCTAGGGGAGCAAACGGGATTAGAGACCCCCGTAGTCC  
>Otu24373  
CCGCCTACGGGGCGCAGCAGTGGGGAATATTGGACAATGGGCGCAAGCCTGATCCAGCCA  
TGCCGCGTAAGTGATGAAGGCCTTCGGGTGTAAAGCTCTGTGGGGAGGGAAGAACCCTT  
GCAGCATCAGATCCTGCAACCTGACGGTACCTCCTTAGCAAGCACCGGCTAACTCCGTGC  
CAGCAGCCGCGGTAATACGGAGGGTGCAAACGTTGCTCGGAATTATTGGGCGTAAAGCGC  
ACGTAGGCGGGTCATCAAGTCGGATGTGAAATCCCTCGGCTTAACCGAGGACGTGCACTC  
GATACTGACAACCTTGAGTACGAAAGAGGATCGCGGAATCCCGGTGTAGAGGTGAAATT  
CGTAGATATCGGGAGGAACACCAGTGGCGAAGGCGGCGATCTGGGTGATACTGACGCTG  
AGGTGCGAAAGCGTGGGGAGCAAACAGGATTAGAAACCCCGTAGTCC  
>Otu24378  
CCAGCCTATGGGTTGCAGCAGTCGAGAATCTTTCGCAATGGGCGCAAGCCTGACGAAGCG  
ACGCCGCTGTGAGTGAAGAAGGCCTTCGGGTGTAAACTCTTTCGCCAGGGAACAAGAGA  
GGTAGGATAACATCCTACCAATTTGATGGTACTTGGTAAAGAAGCACCGGCTAACTCCGT  
GCCAGCAGCTGCGGTAATACGGAGGGTGCAAGCATTGATCGGAATTACTGGGCGTAAAGG  
GCGCGTAGGCGGCTAGAAAAGTCAGATGTGAAATTCCGGGGCTCAACCCCGGAGCTGCAT  
TTGAAACTCTCTAGCTAGAGTACAGTTAGGGTAAACCGGAATTCACGTGTAGCGGTGAAA  
TGCGTAGATATGTGGAAGAACACCGGTGGTGAAGACGGTTTACTGGGCTGTAAGTACGCG  
TGAGGCGCGAAAGCATGGGGATCAAACAGGATTAGAAACCCCTAGTAGTCC  
>Otu24379  
CCAGCCTACGGGGGGCTGCAGTGGGGAATCTTGCACAATGGGCGAAAGCCTGATGCAGCA  
ACGCCGCGTGAGTGAAGAAGGCTTTTGGATTGTAAAGCTCTTTCGGCTAGGAAGAAGGGT  
GTTACAAATAATACCTGTAGCATTTGACGGTACTAGAAGAAGAAGCACTGGCTAATTCCG  
TGCCAGCAGCCGCGGTAATACGGAAGGTGCAAGCGTTGTTTCGGATTGACTGGGCGTAAAG  
GGCGCGTAGGCGGGTTTGCAAGTCGATTGTGAAAGCCCCGGGCTTAACCTGGGAACAGCA  
GTCGAAACTACAGATCTTGAAATGTCTGAGGGGTTAGTGGAATTCTTGGTGTAGGAGTGAA  
ATCCGTAGAAATCAAGAGGAACACCGGCGGCGAAGGCGGCTAACTGGCAGAACATTGACG  
CTGAGGCGCGAAAGCGTGGGGAGCAAACAGGATTAGAAACCCGAGTAGTCC  
>Otu24385  
CCAGCCTATGGGGGGCACCAAGTCGAGGATCTTTGGCAATGAGCGCAAGCTTGACCAAGCG

ACGCCGCGTGTGCGATGAAGGCCTTCGGGTTGTAAAGCACTGTCGAGGGGGACGAAGCCG  
CAAGTTGACCGATCCCTGGAGGAAGCACGGGCTAAGTTCGTGCCAGCAGCCGCGGTAAG  
ACGAACCGTGCGAACGTTGTTTCGGAATCACTGGGCTTAAAGGGCGCGTAGGCGGCTTGCC  
AAGTCAGGGGTGAAATCCAGCAGCTTAACTGTTGAAGTGCCTTTGATACTGGCGAGCTCG  
AGGGAGGTAGGGGTATGTGGAACCTTCTGGTGGAGCGGTGAAATGCGTTGATATCAGAAGG  
AACGCCGCTGGCGAAAGCGAGCTGCTGGACCTTTCTGACGCTGAGGCGCGAAAGCCAGG  
GGAGCAAACGGGATTAGAAACCCCGTAGTCC

>Otu24401

GGACTACTCGGGTATCTAATCCCGTTTGGCTCCCCTAGCTTTCGCGCCTCAGCGTCAGAAA  
AGGTCCAGCGAGCCGCTTCGCCACCGGAGTTCCTGATGATATCAACGCATTTTCACCGCT  
CCACCATCAGTTCGCTCGCCCCCTACCTCCCTCGAGACCGTCAGTATTTGAGGCAGTTCC  
ACGGTTGAGCCGTGGGATTTACCCCCAACTTGACAGCCCGCCTACGCGCCCTTTAAGCC  
CAGTGATTCCGAACAACGTTTCGCTCGGTTTCGTCTTACCGCGGCTGCTGGCACGAACTTAG  
CCCGAGCTTACTGTGGATAGATCAAACCTTTTCGCTTTTCTCCCCACTTTCGCGCTTTACAA  
CCCGAAGGCCTTCATCGCGCACGCGGCATCGCTCGGTCAGGGTTGCCCCCATTTGCCGAAG  
ATCCCCCACTGCTGCCCCCGTAGGCTGG

>Otu24403

CCAGCCTACGGGTTGCTGTCAGTGGGGAATTTTGGACAATGGGCGCAAGCCTGATCCAGCC  
ATGCCGCGTGAGTGAAGAAGGCCTTCGGGTTGTAAAGCTCTTTCAGCAGGAACGAAATGG  
TTCGTGCTAATACCACGGACTGATGACGGTGCCTGAAGAAGAAGCACCGGCTAACTACGT  
GCCAGCAGCCGCGGTAATACGTAGGGTGCAGGCGTTAATCGGAATTACTGGGCGTAAAGC  
GTGCGCAGGCGGTTATGTAAGACAGATGTGAAATGCCCCGGGCTTAACCTGGGAACTGCAT  
TTGTGACTGCATGGCTAGAATCTGGCAGAGGGGGGTAGAATTCCACGTGTAGCAGTGAAA  
TGCGTAGATATGTGGAGGAATACCGATGGCGAAGGCAGCCCCCTGGGCTAAGATTGACGC  
TCATGCACGAAAGCGTGGGGAGCGAACAGGATTAGAAACCCCTGTAGTCC

>Otu24404

GGACTACGGGGGTTTCTAATCCTGTTTGATCCCCACGCTTTCGTGCCTCAGCGTCAGTTA  
CAGTTTTGTGAGCTGCCTTCGCAATCGGTGTTCTGTGTATATCTAAGCATTTTCACCGCT  
ACATGACACATTCCGCCCACATCAAATGTACTCAAGATTGACAGTATCAATGGCAGTTCT  
GCAGTTAAGCTGCAGGCTTTCACCACTGACTTATCATTCCGCCTACGCACCCTTTAAACC  
CAATGAATCCGGATAACGCTTGGATCCTCCGTATTACCGCGGCTGCTGGCACGGAGTTAG  
CCGATCCTTATTCTTACAGTACAATCAGCCCTCTACACGTAGAGGGGTTTTTTCCCGTAT  
AAAAGAAGTTTACAACCCATAGGGCCTTCATCCTTCACGCGGCATGGCTGGATCAGTCTT  
GCGACCATTGTCCAATATTCTTACTGCTGCACCCCATAGGCTGG

>Otu24405

CCAGCCTACGGGGGGCACCAGCCGAGGATCTTCGGCAATGGGCGCGAGCCTGACCGAGCG  
ACGCCGCGTGTGCGATGAAGGCCTTCGGGTTGTAAAGCACTGTCGGGGGGAAGAAAAGG  
CAACCTTGATCGACCCCCGGAGGAAGCACGGGCTAAGTTCGTGCCAGCAGCCGCGGTAAG  
ACGAACCGTGCGAACGTTGTTTCGGAATCACTGGGCTTAAAGGGCGCGTAGGCGGGCGGTC  
AAGTCAGAGGTGAAATCCCACGGCTCAACCGTGGAAGTGCCCCTGATACTGGCCGTCTTG  
AGGGAGGTAGGGGCGTGCAGGAACCTTCGGTGGAGCGGTGAAATGCGTAGATATCGGAAGG  
AACACCGGTGGCGAAAGCGGCGCGCTGGACCTCTTCTGACGCTGAGATGCGAAAGCGTGG  
GGAGCAAACAGGATTAGAGACCCAGTAGTCC

>Otu24407

CCAGCCTACGGGTGGCTGTCAGTCGAGAATTTTTCTCAATGGGCGAAAGCCTGAAGGAGCG  
ACGCCGCGTGGGGGATGAAGGTCTTCGGATTGTAAACCTCTGTACCCGGGGAAGAAACGC  
TTTGAGCGAACAGCTCAAAGCCTGACTTAACCCGGAGAGGAAGCAGTGCTAACTCTGTG  
CCAGCAGCCGCGGTAATACAGAGACTGCGAGCGTTATTTCGGATTCACTGGGCGTAAAGGG  
TGCGCAGGCGGCCAAGTGTGTGAGGCGTGAAAGCCCCGGGCTCAACCCGGGAATTGCACC  
TCAAATACTTGGCTAGAGCATTGGAGAGGGTAGCGGAATTCACGGTGTAGCAGTGAAAT  
GCGTAGATATCGTGAGGAACACCAGAGGCGAAGGCGGCTACCTGGACAATTGCTGACGCT  
CAGGCACGAAAGCGTGGGGAGCAAAGGGATTAGATACCCGTGTAGTCC

>Otu24413

CCAGCCTATGGGTGGCTGTCAGTGGGGAATATTGGACAATGGGGGAAACCCCTGATCCAGCG  
ACGCCGCGTGTGTGAAGAAGGCCTGCGGGTTGTAAAGCACTTTTAGTGGGGACAAAAAGC  
TACGGACTAATACTCTGTGGTCTTGATTTAACTCAAAGAAAAAGCACCGGCTAACTCTGT  
GCCAGCAGCCGCGGTAATACAGAGGGTGCAGGCGTTAATCGGATTTACTGGGCGTAAAGG  
GTGCGTAGGCGGTTTTGTAAAGTCTGTCTGTGAAATCCCCGGGCTCAACCTGGAATTGCGAT

GGAGACTGCAAGGCTAGAACTCTGGCAGAGGGGGGTAGAAATCCACGTGTAGCAGTGAAAT  
GCGTAGAGATGTGGAGGAACACCGATGGCGAAGGCAGCCCCCTGGGTCAAGATTGACGCT  
CATGCACGAAAGCGTGGGGAGCAAACAGGATTAGATACCCCCGTAGTCC

>Otu24419

CCAGCCTATGGGGGGCAGCAGTGGGGAATATTGGACAATGGGCGAAAGCCTGATCCAGCA  
ATGCCGCGTGTGTGAAGAAGGCCTTCGGGTGTAAAGCACTTTTGTCCGGAAGAAAACG  
CTCTAGCTAATATCTGGGGCGGATGACGGTACCGGAAGAATAAGCACCGGCTAACTACGT  
GCCAGCAGCCGCGGTAATACGTAGGGTGCGAGCGTTAATCGGAATTACTGGGCGTAAAGC  
GTGCGCAGGCGGTTTGTAAAGACGGATGTGAAATCCCCGGGCTCAACCTGGGAACTGCAT  
TCGTGACTGGCAAGCTAGAGTATGGCAGAGGGGGGTGGAATTCACGTGTAGCAGTGAAA  
TGCGTAGATATGTGGAGGAACACCGATGGCGAAGGCAGCCCCCTGGGCCAATACTGACGC  
TCATGCACGAAAGCGTGGGGAGCAAACAGGATTAGATACCCGGGTAGTCC

>Otu24422

CAGCCTATGGGGGGCAGCAGCCGAGAATATTCGACAATGGGCGAAAGCCTGATCGAGCGA  
CGCCGCATGCTGGATGAAGTGCTTCGGTACGTAAACAGCTTTTATCGGGGAAGAAATCAT  
TGACGGTACCCGATGAATAAGGGGCTGCTAACTCTGTGCCAGCAGCAGCGGTAATACAGA  
GGCCCCAAGCGTTACCCGGAATTATTGGGCGTAAAGGGTGTGAGGCGGCCATGTTAGTC  
GTTTGTAAATCCGCGGGCTTAACCTGCGGTGCGCAGGCGAAACGGCATGGCTCGAGGGC  
GCGAGAGGTGCATGGAACCTACGGTGGAGGGGTGAAATCCGTTGATATCGTGGGGAACAC  
CAAAGGCGAAGGCAGTGCACCTGGCGCGTTCTTGACGCTCACACACGAAAGCCAGGGGAGC  
GAACGGGATTAGAAACCCGCGTAGTCC

>Otu24431

CCAGCCTATGGGGCGCTCCAGTCGAGAATCTTCGGCAATGGGCGAAAGCCTGACCGAGCG  
ATGCCGCGTGTGGGATGAAGGCCTTCGGGTGTAAACCACTGTCAGAGGGGATGAAATGC  
AGGTGGGTCTCCCATCTGTTTGACATAGCCTCAGAGGAAGGACGGGCTAAGTTTCGTGCC  
AACAGCCGCGGTAAGACGAACCGTCCAAACGTTATTTCGGAATTACTGGGCTTAAAGGGTG  
CGTAGGCGGCGCGGAAAGTAGGGTGTGAAATCCCTCGGCTCAACCGAGGAACTGCGCCCT  
AAACTACCGTGCTTGAGGGAGATAGAGGTGAGCGGAACTTAGGGTGGAGCGGTGAAATGC  
GTTGATATCCTAAGGAACACCGGTGGCGAAAGCGGCTCACTGGATCTTTTCTGACGCTGA  
GGCACGAAAGCTAGGGTAGCGAACGGGATTAGAAACCCCTGTAGTCC

>Otu24440

CCAGCCTATGGGGTGCTCCAGTGGGGAATTTTGCGCAATGGGGGAAACCCTGACGCAGCA  
ACGCCGCGTGGAGGATGAAGCCCTTGGGGCGTAAACTCCTTTTCGACCAAGACGATAATG  
ACGGTACTGGTGGAAGAAGCACCGGCTAACTCTGTGCCAGCAGCCGCGGTAATACAGAGG  
GTGCAAGTGTTGTTTCGGAATTATTGGGCGTAAAGGGCGCGTAGGCGGCGCCACAAGTCAC  
TTGTGAAATCCCCAGGCTTAACCTGGGGCCTGCAGGCGAAAGTGTGGTGCTGGAGTATGG  
GAGAGGTGCGTGGAATTCCTGGTGTAGCGGTGAAGTGCGCAGATATCGGGAGGAACACCG  
GTGGCGAAGGCGGTTCTCTGGGCCTTACCTGACGCTGAGGAGCGAAAGCGTGGGGAGCAA  
ACAGGATTAGATACCCGCGTAGTCC

>Otu24468

CCAGCTATGGGGGGCTGCAGTCGAGAATCTTTTCGCAATGGGCGCAAGCCTGACGAAGCGA  
CGCCGTGTGAGCGAAGAAGGCCTTCGGGTGTAAAGCTCTTTTCGCTAGGGAACAAGAGAG  
GAGTATTAATAACACACCGATTTGAGGGTACTTGGTAAAGAAGCACCGGCTAACTCCGTG  
CCAGCAGCTGCGGTAATACGAGGGGTGCAAGCATTGATCGGAATTACTGGGCGTAAAGGG  
CGCGTAGGCGGCAGGATAAGTCAGGTGTGAAATACCACAGCTCAACTGTGGTGCTGCACT  
TGAAACTGTCCAGCTAGAGCATAGTTAGGGAAAACGGAATTCACGTGTAGCGGTGAAAT  
GCGTAGATATGTGGAGGAACACCACTGGTGAAGACGGTTTCTGGGCTATAGCTGACGCT  
GAGGCGCGAAAGCTAGGGGAGCAAACAGGATTAGATACCCCAGTAGTCC

>Otu24470

CCAGCCTATGGGGGGCAGCAGTGGGGAATCTTTCGCAATGGACGAAAGTCTGACGCAGCG  
ACGCCGCGTGGGTGAAGAAGGCCTTCGGGTGTAAAGCCCTGTGAGTGGGAAAAATGGT  
ATCTGGAGTAATATGCCAGGTAATTGATGGTACCACTAGAGGAAGCACCGGCTAACTTCG  
TGCCAGCAGCCGCGGTAATACGAGGGGTGCAAGCGTTGTTTCGGAATTATTGGGCGTAAAG  
GGCAGGTAGGTTGTCTTGAAAAGTCTACTGTGAAATCCCCGGGCTCAACCCGGGAAGTGCG  
GTGGATACTCCAAGACTAGAGTACTGGAGGGGTGCGTGGAATTCCTGGTGTAGCGGTGAA  
ATGCGTAGATATCGGGAGGAACACCAGAGGCGAAGGCGGCGCACTTGACAGTAACTGACA  
CTCAACTGCGAAAGCGTGGGGAGCAAACAGGATTAGATACCTGGTAGTCC

>Otu24475

CCAGCCTATGGGTCGCAGCAGTAAGGAATCTTCCACAATGGACGAAAGTCTGATGGAGCA  
ACACCGCGTGACAGGATGACGGTCTTCGGATTGTAAACTGCTTTTATATGGGAAGATTATG  
ACGGTACCATATGAATAAGGACCGGCTAACTACGTGCCAGCAGCCGCGGTAATACGTAGG  
GTCCAAGCGTTATCCGGAATCACTGGGCGTAAAGCGTGCGTAGGTGGCGTGTTAAGTGTG  
ATGTTAAATCGTGTGGCTCAACCATATCGATGCATCACATACTGGCATGCTAGAGGGGAG  
CAGAGGCAAGTGGAATTGGTAGTGTAGCAGTGAAATGCGTAGATATTACCAGGAACACCA  
ATGGCGAAGGCAGCTTGCTGGGCTTCTTCTGACACTGAGGTACGAAAGCGTGGGGAGCGA  
ACAGGATTAGAAACCCCGGTAGTCC

>Otu24480

CCAGCCTACGGGTTGCTCCAGTGGGGAATTTTGGACAATGGGGGCAACCCTGATCCAGCG  
ACGCCGCGTGAAGGATGAAGGTCTTCGGATTGTAAACTTCTTTTGTGGGGATGAATGCC  
CTGGTGAATAGCCAGGGGTGACAGTACCCAATGAATAAGCCACGGCTAACTACGTGCCAG  
CAGCCGCGGTAATACGTAGGTGGCAAGCGATACTCGGAATCACTAGGCGTAAAGCGCAGG  
TAGGCGGTTTCGGTAAGTCTTTTGTGAAAGCTCCCGGCTTAACTGGGAGAGGTCAAGGGAA  
ACTACCGGGCTAGAGTGTGGTAGGGGATACTGGAATTCCTGGTGTAGCGGTGAAATGCGT  
AGATATCAGGAGGAATGCCAATGGCGAAAGCAGGTATCTGGGCCATCACTGACGCTGAGC  
TGCGAAAGCTAGGGGAGCAAACAGGATTAGATACCCCTGTAGTCC

>Otu24482

CCAGCCTACGGGAGGCAGCAGTAAGGAATATTGGTCAATGGACGCAAGTCTGAACCAGCC  
ATGCCGCGTGGAGGATGAAGGTCCTCTGGATTGTAAACTTCTTTTATCTGGGACGAAAAA  
GGACCTTTTCAGGTCAACTGACGGTACCAGATGAATAAGCACCGGCTAACTCCGTGCCAG  
CAGCCGCGGTAATACGGAGGGTGCAAGCGTTATCCGGATCACTGGGTTTAAAGGGTGCG  
TAGGTGGGTTGGTAAGTCAGTGGTGAAATCTCCAGGCTTAACTGGAACTGCCATTGAT  
ACTATCAGTCTTGAATATTGTGGAGGTCAGCGGAATATGTCATGTAGCGGTGAAATGCTT  
AGATATGACATAGAACACCAATTGCGAAGGCAGCTGGCTACGCATATATTGACACTGAGG  
CACGAAAGCGTGGGGATCAAAACAGGATTAGAAACCCGGGTAGTCC

>Otu24490

CCAGCCTACGGGGCGCTCCAGTGGGGAATCTTGCGCAATGGGCGAAAGCCTGACCGAGCG  
ACGCCGCGTGTGCGATGAAGGCCCTTCGGGTTGTAAAGCACTGTGAGGGGGAGGAAGCCG  
CAAGGTTGACCTATCCCTGGAGGAAGCACGGGCTAAGTTCGTGCCAGCAGCCGCGGTAAG  
ACGAACCGTGCAACGTTGTTTCGGAATCACTGGGCTTAAAGGGCGCGTAGGCGGACCACC  
AAGTCCGGGGTGAAATCTTTCGGCTCAACCGGAAATAGCCTCGGAGACTGGCGGTCTGG  
AGGGGGGTAGGGGCAGCTGGAACCTCCGGTGGAGCGGTGAAATGTGTTGATATCGGAAGG  
AACGCCGCTGGCGAAAGCGAGCTGCTGGACCTTTTCTGACGCTGAGGAGCGAAAGCCAGG  
GGAGCAAACGGGATTAGATACCCGAGTAGTCC

>Otu24491

CCAGCCTATGGGATGCAGCAGTGGGGAATCTTGACACAATGGAGGAAACTCTGATGCAGCG  
ACGCCGCGTGAGTGATGAAGCCCTTCGGGGTGTAAAGCTCTTTCGACCGGGACGAATGCC  
CGCAAGGGAGTGACGGTACCGGTATAAGAAGCCCCGGCTAACTACGTGCCAGCAGCCGCG  
GTAAGACGTAGGGGGCCAGCGTTGTTTCGGAATTACTGGGTGTAAAGGGTTCGTAGGCGGT  
GCGGCAAGTTGGGAGTGAAATCTCTGGGCTCAACCCAGAGGCTGCTTCCAAAACCTGCTGT  
GCTTGAGTGTGAGAGAGGCTCGTGGAATTGCAGGTGTAGCGGTGAAATGCGTAGATATCT  
GCAGGAACACCCGTGGCGAAAGCGGCGAGCTGGATCACAACTGACGCTGAGGAACGAAAG  
CTAGGGGAGCAAACAGGATTAGATACCCGAGTAGTCC

>Otu24498

CCAGCCTATGGGGCGCTGCAGTGGGGAATATTGGACAATGGGGGAAACCCTGATCCAGCA  
ATGCCGCGTGTGTGAAGAAGGTCTTCGGATTGTAAAGCACTTTTGGCAGGGACGATGATG  
ACGGTACCTGCAGAATAAGCCCCGGCTAACTTCGTGCCAGCAGCCGCGGTAATACGAAGG  
GGGCTAGCGTTGCTCGGAATGACTGGGCGTAAAGGGCGCGTAGGCGGCACACACAGTCAG  
AAGTGAAACTCCTGGGCTCAACCTGGGGACTGCTTTTGATACGTGTGAGCTAGAGTGAGG  
AAGAGGGTTGTGGAATTTCCAGTGTAGAGGTGAAATTCGTAGATATTGGAAAGAACATCA  
GTGGCGAAAGCGGCTTCCTGGTCCAGCGCCGACGTTTCAGGCACGAAAGCGTGGGGAGCAA  
ACAGGATTAGATACCCGTGTAGTCC

>Otu24508

CCAGCCTATGGGGGGCAGCAGTGGGGAATATTGGACAATGGGGGCAACCCTGATCCAGCA  
ATGCCGCGTGTGTGAAGAAGGCCCTTCGGGTTGTAAAGCACTTTAGGATGGGAAGAAGGTG  
TGTATTTTAAAGAGATAACACATTTGACGGTACCATCAGAATAAGCACCGGCTAACTCTGT  
GCCAGCAGCCGCGGTAATACAGAGGGTGCAAGCGTTAATCGGAGTTACTGGGCGTAAAGG

GCGCGTAGGTGGTTGTGTAAGTTGTTTGTGAAGTCCCCGGGCTTAACCTGGGAACTGCAA  
GCAAAACTGCATAACTGGAGTACTGTAGAGGGTAGTGGAATTTCCGGTGTAGCGGTGAAA  
TGCGTAGAGATCGGAAGGAACACCAAGTGGCGAAGGCGGCTACCTGGACAGATACTGACAC  
TGAGGCGCGAGAGCGTGGGGAGCAAACAGGATTAGATACCCCTGTAGTCC

>Otu24522

CCAGCCTACGGGACGCACCAGTGGGGAATTTTGGACAATGGGGGCAACCCTGATCCAGCC  
ACGCCGCGTGAGTGAAGAAGGCCTTCGGGTGTAAACCCCTTTCAGTTGGGACGAAGCTT  
CTCCGGTGAATAGCCGGATGGAGTGACGGTACCTTCACAAGAAGCACCGGCTAACTACGT  
GCCAGCAGCCGCGGTAATACGTAGGGTGCAAGCGTTGTCCGGAATTATTGGGCGTAAAGA  
GCGTGTAGGCGGCCCATTAGTCCGCTGTGAAAGTCCAGGGCTCAACCCTGGAATGCCGG  
TGGATACTGTGGGGCTAGAGTCCGGAAGGGGCGAGTGGAAATTCCTGGTGTAGCGGTGAAA  
TGCGCAGATATCAGGAGGAACACCAATGGCGAAGGCAGCTCGCTGGGACGTGACTGACGC  
TGAGACGCGAAAAGCGTGGGGAGCAAACAGGATTAGATACCCCTGTAGTCC

>Otu24549

CCAGCCTATGGGTCGCAGCAGTCAAGAACATTCGACAATGGGCGAAAAGCCTGATCGAGCG  
ACGCCGCGTGAGGATGAAGGCCTTCGGGTGCTAAACTGCGGTAATACAATAACAATGTA  
AATGAGTGTGTATGGAAGAGGCGGGTAACCTACGTGCCAGCACCAGCGGTAAACGTAG  
ACCTCAAGCGTTATCCGGATTTATTGGGCGTAAAGCGCGTGTAGGAGGTTTTGTGCGTCT  
TTTGTAAAGCCCGGGCCCTAACCCCGGAAGTGCAGGAGATACGGCAGAACTAGAGGAGG  
TTAGAGGTGCATAGAACGCACGGTGTAGGGGTGAAATCCGTTGATATCGTGCGGAATACC  
AAAGGCGAAGGCAGTGCCTGGGACCTTCCTGACTCTGAGACGCGAAAAGCGTGGGGAGCA  
AAAAGGATTAGATACCCCTCGTAGTCC

>Otu24552

CCAGCCTATGGGGGGCAGCAGCTAGGAATATTGGACAATGGGCGCAAGCCTGATCCAGCC  
ATGCCGCGTGAGCGATGAAGGCCTTCGGGTGTAAAGCTCTTTAGTCCACGAATATAATG  
ACTGTAGTGGAAGAATAAGCCCCGGCTAACTTCGTGCCAGCAGCCGCGGTAATACGAAGG  
GGGCGAGCGTTATTCGGAATCACTGGGCGTAAAGCGTGCCTAGGCTGTTTCAGCAAGTCAG  
AAGTGAAAGCCCAGGGCTCAACCCTGGAAGCGCTTTTGAAACTGCTGGACTCGAATTCGG  
GAGAGGATAGCGGAATTGTCAGTGTAGCAGTGAAATGCGTAGATATTGACAGGAACACCA  
GTGGCGCAAGCGGCTATCTGGACCGACATTGACGCTGAGGCACGAAAGCGTGGGGATCAA  
ACAGGATTAGATACCCCTCGTAGTCC

>Otu24559

CCAGCCTATGGGGTGCAGCAGTCGAGAATCTTTCGCAATGGGCGAAAAGTCTGACGGAGCG  
ACGCCGCGTGGTTGATGAAGTGCTTCGGCATGTAAATCCTTTTGCCAGGGAAAAAGTTT  
ATTGATTGTACCTGGAGAATAAGAGGTTGCTAAACTCGTGCCAGCAGCAGCGGTAATACG  
AGTGCCTCGAGCGTTATCCGGAATTATTGGGCGTAAAGGGTGCCTAGGTGGTTGTGTAG  
TCCTTTGTAAATTTCTCGGCTCAACCGAGAAGCCGCACGGGAAACGGCACGACTCAGAG  
GTTAGAAGGGGTGTGCGGAACCATGGTGTAGCGGTGAAATGCGTTGATATCATGGGGAA  
CACCAAAGCGAAGGCAGCAAACCTGGTCTATACCTGACACTGAGGCACGAAAGCGTGGGT  
CGCGAATGGGATTAGAAACCCCGTAGTCC

>Otu24560

CCAGCCTACGGGGGGCAGCAGTGGGGAATATTGGACAATGGGGGCAACCCTGATCCAGCA  
ATGCCGCGTGTGTGAAGAAGGCCTTCGGGTGTAAACTCTTTTAGATGTGACGATGATG  
ACGGTAACATCAGAAAAAGCTCCGGCTAACTTCGTGCCAGCAGCCGCGGTAATACGAAGG  
GAGCGAGCGTTGTTTCGGAATCACTGGGCTTAAAGCGTGCCTAGGCGGATGTGTAAGTCAG  
GAGTGAAATCCCAGGGCTTAACCCTGGAAGTCTCTTGAGACTGCATATCTGGAATTCGG  
TAGAGGCTAGTGGAACCTCTAGTGTAGAGGTGAAATTCGAGATATTAGGAAGAACACCG  
GTGGCGAAGGCGACTAGCTGGACCGACATTGACGCTGAGGCACGAAAGCGTGGGTAGCAA  
TCAGGATTAGAGACCCCTGTAGTCC

>Otu24570

CCAGCTACGGGTGGCTGCAGTCGAGAATCTTCCGCAATGGACGAAAGTCTGACGGAGCGA  
CACCGCGTGATTGATGAAGTCCCTCTGGGACGTAAAGATCTTTTATGAGGGAAGAAGTTT  
ATTGACGGTACCTCATGAATAAGGGGCTCCTAATCTCGTGCCAGCAGGAGCGGTAATACG  
AGAGCCCCGAGCGTTATCCGGAATTACTGGGCGTAAAGGGTGCCTAGGTGCTTTGTAG  
TCACATGTTAAATCCCCGAGCTCAACTTGGGAATCGCAAGTGAAACGGCAGAGCTTGAGA  
GTGTGAGAGGTGCGTGGAACCTCATGGTGTAGGGGTGAAATCCGTTGATATCATGGGGAAC  
ACCAAAGCGAAGGCAGCGCACTGGCACATTTCTGACACTGAAGCACGAAAGCGTGGGTA  
GCAAACAGGATTAGAGACCCGAGTAGTCC

>Otu24596

CCAGCCTATGGGGTGCAGCAGTTTCGAATCATTCACAATGGGGAAACCCTGATGGAGCGA  
CGCCGCGTGGGGGATGAATGGCTTCGGCCCGTAAACCCCTGTCATTTGCGAACAAGTGTG  
TACACCCAATACGTGTGCACTTGATTGTAGCGGAAGAGGAAGGGACGGCTAACTCTGTGC  
CAGCAGCCGCGGTAATACAGAGGTCCCAAGCGTTGTTTCGGATTCACTGGGCGTAAAGGGT  
GCGTAGGTGGCCAGGTAAGTCTGATGTGAAATCTCGGAGCTCAACTCCGAAACTGCATTG  
GATACTATCTGGCTGGAGGGTTCGGAGGGGGGACTGGAATTCTCGGTGTAGCAGTGAAATG  
CGTAGATATCGAGAGGAACACCAGTGGCGAAGGCGAGTCCCTGGACGACTCCTGACGCTG  
AGGCACGAAAGCCAGGGGAGCAAACGGGATTAGATACCCAGTAGTCC

>Otu24605

CCAGCCTATGGGTTGCAGCAGTGGGGAATCTTGACACAATGGGCGAAAGCCTGACGATGCG  
ACGCCGCGTGAGCGATGAAGCCCTTCGGGGTGTAAGCTCTTTCGTCAGGGAAGATAGTG  
ACGGTACCTGGAGAAGCAGCTGCGGCTAACTACGTGCCAGCAGCCGCGGTAATACGTAGG  
CAGCAAGCGTTGTTTCGGAGTTACTGGGCGTAAAGGGTGCGTAGGCGGCTATTTAAGTTTG  
GTGTGAAATCTCCCGGCTCAACCGGGAGGGTGCGCCGAATACTGAGTGGCTAGAGTGC GG  
GAGAGGAAAGTGGAATTCCTGGTGTAGCGGTGAAATGCGTAGATATCAGGAGGAACACCG  
GTGGTGTAAACGGCCTTCTGGACCGTAACCTGACGCTGAGGCACGAAAGCGTGGGTAGCAA  
ACAGGATTAGAGACCCCGGTAGTCC

>Otu24616

CCAGCCTACGGGTGGCTCCAGTAGGGAATATTGGACAATGGGCGAAAGCCTGATCCAGCA  
ATGCCGCGTGAGTGAGGAAGGCCCTTAGGGTTGTAAAGCTCTTTCGGCGGGGACGATGATG  
ACGGTACCCGCAGAAGAAGCCCCGGCTAACTTCGTGCCAGCAGCCGCGGTAATACGGAGG  
GTGCAAGCGTTATCCGGATTTACTGGGTTTAAAGGGTGCGTAGGTGGGCAGGTAAGTCAG  
TGGTGAAATCTCCGGGCTTAACCTCGGAACTGCCATTGATACTATCTGTCTTGAATATTC  
TGGAGGTAAGCGGAATATGTCATGTAGCGGTGAAATGCTTAGATATGACATAGAACACCA  
ATTGCGAAGGCAGCTTACTACGGGATTATTGACACTGAGGCACGAAAGCGTGGGGATCAA  
ACAGGATTAGATACCCCTGTAGTCC

>Otu24619

CCAGCCTATGGGAGGCAGCAGTCGAGGATCTTCGTCAATGGGCGCAAGCCTGAACGAGCG  
ACGCCGCGTGCGCGATGAAGGCCCTTCGGGTTGTAAAGCGCGAAAGTGGGGATAAAACCGC  
AAGGTTGATTGATCCACAGTAAGGACGGGCTAAGTTTCGTGCCAGCAGCCGCGGTAAGACG  
AACTGTCCAAACGTTGTTTCGGAATCACTGGGCTTAAAGGGCGCGTAGGCGGTGCATCAAG  
TCAGGGGTGAAATCCTGCAGCTTAACTGTAGAAGTGCCCTTGATACTGGTTGTCTGGAGG  
GAGGTAGGGGTGTGTGGAACCTCCAGTGGAGCGGTGAAATGCGTTGATATTGGAAGGAAC  
GCCGGAGGCGAAAGCGACGCACTGGACCTCTTCTGACGCTCAAACACGAAAGCCAGGGTA  
GCGAACGGGATTAGAAACCCCCGTAGTCC

>Otu24635

CAGCCTATGGGGGGCACCAGTGGGGAATCTTGACACAATGGGCGAAAGCCTGATGCAGCGA  
CGCCGCGTGGGGGATGAAGCTTTTCGGGTGTAAACCCCTTTCGACTGGGACGAATACCTC  
GCAAGAGGGGTGACGGTACCAGTATAAGAAGCCCCGGCTAACTACGCGCCAGCAGCCGCG  
GTAATACGTAGGGGGCCAGCGTTGTTTCGGAATCACTGGGTGTAAAGGGTTCGTAGGCGGT  
GAGGCAAGTTGGAAGTGAAATCTCTGGGCTCAACCCAGAGACTGCTTTCAAACTGCTTT  
GCTTGAGTGTGGGAGAGGCGCGTGGAATTGCAGGTGTAGCGGTGAAATGCGTAGATATCT  
GCAGGAACACCCGTGGCGAAAGCGGCGCGCTGGACCACAACCTGACGCTGAGGAACGAAAG  
CTAGGGGAGCAAACAGGATTAGAAACCCCTGTAGTCC

>Otu24642

CCAGCCTATGGGTCGCTGCAGTGGGGAATCTTGACACAATGGGCGAAAGCCTGATGCAGCA  
ACGCCGCGTGAGTGAAGAAGGCCCTTGGGTTGTAAAGCTCTTTCGGCCGGGAAGAAGGGT  
GCTATGGTAAATAATCTTAGCATTTGACGGTACCGGAAGAAGAAGCACCTGCTAACTACG  
TGCCAGCAGCAGCGGTAATACGTAGGGTGCAAGCGTTGTTTCGGAATTATTGGGCGTAAAG  
CGCACGTAGGCGGGTCTGTAAAGTCGATTGTGAAAGCCCCAGGCTTAACCTGGGAATTGCA  
GTTCGATACTGCAGATCTTGAATGCTTGAGAGGGTGATGGAATTCCAGGTGTAGAAGTGAA  
ATTCGTAGATATCTGGAGGAACACCGGAGGCGAAGGCGTTCACCTGGTGAGACTTTGACG  
CTGAGGTGCGAAAGCGTGGGGAGCAAACAGGATTAGATACCCTGTAGTCC

>Otu24649

CCAGCCTACGGGACGCTGCAGTGGGGAATATTGCGCAATGGGGGCAACCCTGACGCAGCA  
ACGCCGCGTGAGTGATGAAGGTCTTCGGATCGTAAAGCTCTGTTCGGCAGGAACGATGGGG  
TCGTTGGCTAACATCCAACGACTTTGACGGTACCTGCAAAGGAAGCACCGGCTAACTCTG



TGCCAGCAGCCGCGGTAAAGACAGAGGGTGCAAGCGTTGTTTCGGAATCATTGGGCGTAAAG  
GGCGCGTAGGCGGTTGGGTAAAGTCAATGTGAAAGCCAGGGCTCAACCTTGGAAGTGCA  
TCCGAAACTACCTAAGTAGAGTCCCGGAGAGGGTGGTGGAAATCCCCAGTGTAGAGGTGAA  
ATTCTAGATATTGGGAGGAACACCGGTGGCGAAGGCGACCGCTGGACGGAGACTGACG  
CTGAGGCGGAGAGCGTGGGGAGCAAACAGGATTAGATACCCTAGTAGTCC

>Otu24659

CCAGCCTATGGGACGCAGCAGTGGGGAATTTTGGACAATGGGGGCAACCCTGATCCAGCG  
ACGCCGCGTGTGGGATGAAGGCCCTCTGGGTTGTAAACCACTGTAGAAAGGGACAAAGGT  
CGCGCTCTGCGTGAAGTAGATGGTACCTTTAAAGTAAGCCTCGGCTAACTACGTGCCAGCA  
GCCGCGGTAATACGTAGGAGGCAAGCGTTGTCCGGAATCACTGGGTGTAAAGGGTGCAGCA  
GGCGGGAAAGTAAGTCAATGGTGAATCTCACGGCTCAACCGTGAACTGCCATTGATAC  
TGCTTTTCTTGAGTTCGGGAGAGGGTGGTGGAAATCTTGGTGTAGCGGTGAAATGCGTAG  
ATATCAAGAAGAACCAGTGGCGAAGGCGGCCACCTGGCCCGTAACTGACGCTCATGCA  
CGAAAGCGTGGGGATCAAACAGGATTAGATACCCCGTAGTCC

>Otu24675

CCAGCCTACGGGGTGCAGCAGTAGGGAATTTTCCACAATGGGCGAAAGCCTGATGGAGCA  
ACGCCGCGTGCAGGAAGAATGCTTTAGGGTTGTAAACTGCTTTTCTCTGTGAGGATTATG  
ACAGTAGCAGAGGAATAAGGATCGGCTAACTCCGTGCCAGCAGCCGCGGTCATACGGAGG  
ATCCAAGCGTTATCCGGAATTACTGGACGTAAAGAGTTGCGTAGGCGGCAGAGTAAGCAG  
GGCGTGAAAGCGTGTGGCTCAACCATAACATACATGTCTTGAACACTCAGCTAGAGGGCG  
AGAGAGGTAGCTGGAATTTCCAGTGTAGGAGTGAATCCGTAGATATTGGGAAGAACC  
GATGGCGTAGGCAGGCTACTGGCTCGTACCTGACGCTCAGGCACGAAAGCGTGGGGAGCG  
ACCGGGATTAGAAACCCCTGTAGTCG

>Otu24676

CCAGCCTACGGGTGGCACCAGTGGGGAATCTTGGACAATGGGGGCAACCCTGATCCAGCC  
ATGCCGCGTGAGTGATGAAGGCCCTTCGGGTTGTAAACTCTTTTCGACGGGGACGATAATG  
ACGGTACCCGTAGAAGAAGCTCCGGCTAACTTCGTGCCAGCAGCCGCGGTAATACGAAGG  
GGGCTAGCGTTGTTTCGGAATGACTGGGCGTAAAGGGCGCGTAGGCGGTGAACACAGTTAG  
GCGTGAAATTTCCGGGCTCAACCTGGGGGCTGCGTTTAAATACATGTTTCGCTTGAGTTCGG  
AAGAGGGTCGTGGAATTTCCAGTGTAGAGGTGAAATTCGTAGATATTGGGAAGAACC  
GTGGCGAAGGCGGCGACCTGGTCCGATACTGACGCTGAGGCGCGAAAGCGTGGGGAGCAA  
ACAGGATTAGAGACCCTCGTAGTCC

>Otu24702

CCAGCCTACGGGGCGCAGCAGTGGGGAATATTGGACAGTGGGCGCAAGCCTGATCCAGCA  
ATGCCGCGTGAGTGAAGAAGGTCTTCGGATTGTAAAGCTCTTTTCGACGGGGACGATGATG  
ACGGTACCCGTAGAAGAAGCCCCGGCTAACTTCGTGCCAGCAGCCGCGGTAATACGAAGG  
GGGCTAGCGTTGCTCGGAATGACTGGGCGTAAAGGGCGCGTAGGCGGTGGCTTAGTTAG  
GCGTGAAATTTCTGGGCTCAACCTGGGGACTGCGCTTAATACAGGTCGACTAGAGTGTGA  
AAGAGGGTCGTGGAATTTCCAGTGTAGAGGTGAAATTCGTAGATATTGGGAAGAACC  
GTGGCGAAGGCGACGACCTGGTTCATGACTGACGCTGAGGCGCGAAAGCGTGGGGAGCAA  
ACAGGATTAGATACCCGCGTAGTCC

>Otu24706

CCAGCCTATGGGAGGCTGCAGCGAGGAATATTGCACAATGGGCGCAAGCCTGACGCAGTA  
ACGCCGCGTGAGGGACGAAGACCTTCGGGTTGTAAACCTCTTTTCAATTTGACGAGTGAG  
GACGGTAAAGTTGGAATCAGTCTCGGCTAACTACGTGCCAGCAGCCGCGGTAAGACGTAG  
GAGGCGAGCGTTATCCGGATTCACTGGGCGTAAAGCGCATGTAGGCGGTGGACAAGTCC  
TGTATGAAAGCCCCTGGCTCAACTGGGGGAGGTTATAGGAGACTGTTTCGACTGGAGGGTA  
GCAGAGGTCCGTGGAATTTCCGGTGTAGCGGTGGGATGCGTAGAGATCGGGAAGAATC  
AGTGGCGAAGGCGACCGACTGGGCTACATCTGACGCTGAGATGCGAAAGTGTGGGGATCA  
AACAGGATTAGATACCCTTGTAGTCC

>Otu24712

CCAGCCTACGGGACGCAGCAGTCGAGAATTTTCTCAATGGGCGAAAGCCTGAAGGAGCG  
ACGCCGCGTGGGGGATGAATGGCTTCGGCCCGTAAACCCCTGTCATTTGTGAACAAATTA  
ATCTACCCAACACGTGGATTATTGATAGTAACGGAAGAGGAAGGGACGGCTAACTCTGTG  
CCAGCAGCCGCGGTAATACGAAGGGGGCTAGCGTTGCTCGGAATGACTGGGCGTAAAGGG  
CGCGTAGGCGGATGGTACAGTCAGATGTGAAATTTCTGGGCTTAACCTGGGGGCTGCATT  
TGATACGTGGCGGCTAGAGTGCGGAAGAGGGTTCGTGGAATTTCCAGTGTAGAGGTGAAAT  
TCGTAGATATTGGGAAGAACCAGGTGGCGAAGGCGGCGACCTGGTCCGTAACTGACGCT

GAGGCGCGAAAGCGTGGGGAGCAAACAGGATTAGAGACCCTAGTAGTCC

>Otu24717

CCAGCCTATGGGGGGCAGCAGTGGGGAATCTTGCACAATGGACGAAAGTCTGATGCAGCA  
ACGCCGCGTGGGGGATGAAGCTTTTCGGAGTGTAACCCCTTTTCGACCCGGAAGAATGCC  
CGCAAGGGCTTGACGGTACGGGTATAAGAAGCCCCGGCTAACTACGTGCCAGCAGCCGCG  
GTAATACGTAGGGGGCCAGCGTTGCTCGGAATTACTGGGCGTAAAGGGTGTGTAGGCGGT  
TCTCTAAGTTTGGTGTGAAATCTCCCGGCTTAACCGGGAGGGTGCGCCGAAAACCTGGGGA  
ACTAGAGTGCGGGAGGGGAGAGTAGAATTCTTGGTGTAGCGGTGAAATGCGTAGATATCA  
GGAGGAATACCGGTGGTGTAGACGGCTCTCTGGACCGTAACTGACGCTGAGACACGAAAG  
CGTGGGTAGCAAACAGGATTAGAGACCCAGTAGTCC

>Otu24725

CCAGCCTATGGGATGCTGCAGTCGAGAATCATTCGCAATGGGCGAAAGCCTGACGATGCG  
ACGCCGTGTGAACGAAGAAGGCCTTCGGGTGTAAAGTTCTTTTCGCTTGGGAACAAGAAA  
GGGGGGCTAATATCTCCCTGATTTGAGAGTATCAGGTAAAGAAGCACCGGCTAACTCCGT  
GCCAGCAGCTGCGGTAATACGGAGGGTACAAGCATTAATCGGATTTATTGGGCGTAAAGG  
GCGCGTAGGCGGGTAGAAAAGTCAGATGTGAAATCCCGGGGCTTAACCTCGGAAGTGCAT  
TTGAAACTCTTTATCTTGAGGGTAGGCGGAGAAAGCGGAATTCACAAGTAGCGGTGAAA  
TGCGTAGATATGTGGAAGAACACCGGTGGCGAAGGCGGCTTTCTAGCTTATTCCTGACGC  
TGAGGCGCGAAAGCAAGGGGATCAAACAGGATTAGAGACCCAGTAGTCC

>Otu24741

CCAGCCTACGGGTTGCTGCAGTCGAGAATTTTTTCAATGGGGGAAACCCTGATGGAGCG  
ACGCCGCGTGGAGGATGAAGGTCTTCGGATTGTAACTCCTGTCATTGGGGAACAAGGTG  
CATTTATTAAGTGTAGGTGCATTGATAGTACCTGAAGAGGAAGAGACGGCTAACTCTGTG  
CCAGCAGCCGCGGTAATACAGAGGTCTCAAGCGTTGTTTCGGATTTCATTGGGCGTAAAGGG  
TGCGTAGGCGGCGAGGCAAGTCAGGTGTGAAATCTCGGAGCTTAACCTCCGAAACTGCACT  
TGATACTGCCTTGCTAGAGTACTGGAGAGGAGATTGGAATTTACGGTGTAGCAGTGAAAT  
GCGTAGATATCGTAAGGAAGACCAGTGGCGAAGGCGAATCTCTGGACAGTTACTGACGCT  
GAGGTGCGAAAGCGTGGGGAGCAAACAGGATTAGATACCCCCGTAGTCC

>Otu24756

CCAGCCTATGGGAGGCTGCAGTCGAGAATCTTCCGCAATGGGCGAAAGCCTGACGGAGCG  
ACGCCGCGTGATTGATGAAGTCCTTCGGGACGTAAAGATCTTTTATGAGGGAGGAAGTAA  
TTGACGTTACCTCATGAATAAGGGGCTCCTAACTCTGTGCCAGCAGGAGCGGTAATACAG  
AGGCCCCAAGCATTATCCGGAATCACTGGGCGTAAAGGGTGTGTAGGCGGCGTTGTTAGT  
CTTTTGTTAAAGTTCCAGGGCTTAACCCAGGAAATGCAGGAGAAACGGCAATGCTTCGAG  
GATGCGAGAGGTAAAGGGAACTCATGGTGTAGGGGTGAAATCCGTTGATATCATGGGGAA  
CACCAAATGCGAAGGCACCTTACTGGCGCACTCCTGACGCTGAAACACGAAAGCGTGGGA  
ATCGAACGGGATTAGGACCCCCGTAGTCC

>Otu24758

CCAGCCTATGGGGGGCTGCAGTAACGAATCTTCCGCAATACACGAAAGTGTGACGGAGCG  
ACGCCGCGTGAGGAGACGAAGTTCTTCGGAATGTAACTTCTGTCAGGGGATACCAAGTTC  
TGAGGATCCCCAGAGGAAGGGGCGACTAACTCTGTGCCAGCGGTGCGGTAAGACAGAGG  
CCCCGAGCGTTAGGCGGAATCACTGGGCTTAAAGCGTGTGTAGGCGGATTCCTAAGTACC  
TTGTGAAATCCCCGGGCTCAACCCGGGAACTGCTTGGTATACTGGGTATCTTGAGCCAAT  
TAGGGGCGATCGGAACAAACGGTGGACCGGTGAAATGCGTAGATATCGTTTGGAGCGCCA  
ATGGTGAAAACAGATCGCTGGGATTGTGCTGACGCTGAGACACGAAAGCCAGGGGAGCAA  
ACGGGATTAGAAACCCAGTAGTCC

>Otu24772

CCAGCCTACGGGGGGCACCAGTCGAGGATCTTCGTCAATGGGCGCAAGCCTGAACGAGCG  
ACGCCGCGTGGGGGATGAATGGCTTCGGCCGTAACCCCTGTCATTTGCGAACAAATTT  
CTTGATTTAACAGATGAAGAATTGATTGTAGCGGAAGAGGAAGGGACGGCTAACTCTGTG  
CCAGCAGCCGCGGTAATACAGAGGTCCCAAGCGTTGTTTCGGATTCACTGGGCGTAAAGGG  
TGCGTAGGTGGCCGGGTAAGTCTGATGTGAAATCTCGGAGCTCAACTCCGAAACTGCATT  
GGATACTATCCGGCTGGAGGGTCGGAGGGGGGACTGGAATTCCTCGGTGTAGCAGTGAAAT  
GCGTAGATATCGAGAGGAACACCAGTGGCGAAGGCGAGTCCCTGGACGACTCCTGACACT  
GAGGCACGAAAGCTAGGGGAGCAAACAGGATTAGATACCCAGTAGTCC

>Otu24774

CCAGCCTATGGGTTGCTCCAGTCGAGGATCTTCGGCAATGGGCGCAAGCCTGACCGAGCG  
ACGCCGCGTGTGCGATGAAGGCCCTCGGGTCGTAAAGCACTGTGCGGGGGGAGAAAAGCC

GCAAGGCCTGATCGACCCCCGGAGGAAGCACGGGCTAAGTTCGTGCCAGCAGCCGCGGTA  
AGACGAACCGTGCGAACGTTGTTTCGGAATCACTGGGCTTAAAGGGCGCGTAGGCGGGGAT  
CCAAGTCAGGGGTGAAATCCCACGGCTCAACCGTGGAAGTGCCTCTGATACTGGGTGCCT  
AGAGGGGTGCAGGGGCATGCGGAAGTCAGGGTGGAGCGGTGAAATGCGTAGATATCCTGA  
GGAACACCGGTGGCGAAAGCGGCGTGCTGGACACCTACTGACGCTGAGGCGCGAAAGCCA  
GGGGAGCAAACGGGATTAGAAACCCGTGTAGTCC

>Otu24777

CCAGCCTACGGGGGGCAGCAGTAGGGAATATTGCTCAATGGGGGAAACCCTGAAGCAACA  
ACGCCGCGTGAGTGATGAAGGCCTTCGGGTCGTAAAGCTCTGTTGTACGGGACGAATGCG  
CACATGGCTAACATCCATGTGCAGTGACAGTACTGTATAAGAAAGGACCGGCTAACTTCG  
TGCCAGCAGCCGCGGTAAGACGGGGGGTCTAGCGTTGTTTCGGAATCATTTGGGCGTAAAG  
CGTGTGCAGGTGGTTTTTGTAAAGTTAGATGTGAAAGCCTTGGGCTTAACCCAAGAAGTGCA  
TTTAAAACTACAAAACCTTGAGTATGGAAGAGGGTCTGTGGAATTCCAGGTGTAGTGGTGAA  
ATACGTAGATATCTGGAGGAACACCGGTGGCGAAGGCGGCGACCTGGTCTTATACTGACA  
CTCATATACGAAAGCGTGGGGAGCAAACAGGATTAGATACCCAGTAGTCC

>Otu24783

CCAGCCTATGGGGGGCACCAGTGGGGAATCTTGACACAATGGAGGAAACTCTGACGCAGCG  
ACGCCGCGTGGGTGACGAAGGCCTTCGGGTCGTAAAGCCCTGTCAGGAGGGAAGAAAAAC  
AATGTGGCTAACATCTACATTGCTTGACGGTACCTCCGGAGGAAGCACCGGCTAACTACG  
TGCCAGCAGCCGCGGTAATACGTAGGGTGTAGCGTTGTTTCGGAATCATTTGGGCGTAAAG  
CGCGTGTAGGCGGTTAGGTAAGTCGGGTGTGAAAGCCCTGGGCTCAACCCAGGAAGTGCA  
TCCGAAACTACCTAGCTGGAGGACGGTAGAGGAAGGTGGAATTCCTAGTGTAGAGGTGAA  
ATTCGTAGATATTAGGAGGAATACCGGTGGCGAAGGCGGCCCTTCTGGGCCGCTCCTGACG  
CTGAGACGCGAAAGCGTGGGTAGCAAACAGGATTAGAAACCCGAGTAGTCC

>Otu24800

CCAGCCTACGGGTGGCACCAGTGGGGAATATTGGGCAATGGGCGCAAGCCTGACCCAGCC  
ACGCCGCGTGAGTGATGAAGGCCTTCGGGTCGTAAAGCTCTGTGGGGAGGGACGAATAAG  
CACCGTGCTAACATCACGGGGCCCTGACGGTACCTCCTTAGCAAGCACCGGCTAACTCTG  
TGCCAGCAGCCGCGGTAATACAGAGGGTGCAGCGTTAATCGGAATTACTGGGCGTAAAG  
CGCGCGTAGACGGTTTTGGTAAGTCAGATGTGAAATCCCTGGGCTCAACCTGGGAACCTGCA  
TTTGAAACTGCCTGGCTAGAGTATGGAAGAGGGAAGTGGAATTTCCGGTGTAGCGGTGAA  
ATGCGTAGATATCGGAAGGGACACCAGTGGCGAAAGCGACTTCCTGGTCCAATACTGACG  
TTCATGTGCGAAAGCGTGGGGAGCAAACAGGATTAGAGACCCCCGTAGTCC

>Otu24806

CCAGCCTATGGGGTGCTGCAGCTAAGAATATTCCGCAATGGACGAAAGTCTGACGGAGCG  
ACGCCGCGTGATGACGAAGGCCGAAAGGTTGTAAAGTCCTTTTGTGGGGAAGAATAAC  
CATGGGAGGGAATGCCCGTGGGATGACATGAACCGACGAATAAGCCCCGGCTAATTACGT  
GCCAGCAGCCGCGGTAATACGTATGGGGCAAGCGTTGTTTCGGATTTATTGGGCGTAAAGG  
GCGTGTAGGCGGCTCATCAAGTCTGGTGTGAAATCGCAGGGCTTAACCTGCATATGCGC  
TGGAAACTGGTGGGCTTGAGTTCTTGAGGGGAGGCTGGAATTCAGGTGTAGGGGTGAAA  
TCTGTAGATATCTGGAAGAACACCGGTGGCGAAGGCGAGCTTCTATCAGAGGACTGACGC  
TGAGGCGCGAAAGCCAGGGGAGCAAACAGGATTAGATACCCTCGTAGTCC

>Otu24809

CCAGCCTATGGGGCGCTCCAGTGGGGAATATTGGACAATGGGGGCAACCCTGATCCAGCA  
ATGCCGCGTGTTGAAGAAGGTCTTCGGATTGTAAAGCACTTTTGGCAGGGACGATGATG  
ACGGTACCTGCAGAATAAGCCCCGGCTAACTTCGTGCCAGCAGCCGCGGTAATACGGAGG  
GTGCAAGCGTTATTTCGGAATTACTGGGCGTAAAGCGCGTGCAGGCGGGCGTACAAGTCTG  
ATGTGAAAGCCCCGGGCTTAACCTGGGAAGTGCAATTGGAACTGTACGTCTTGAGTTCTG  
GAGAGGAAGGGGGAATTCCTGGTGTAGAGGTGAAATTCGTAGAGATCGGGAGGAATACCA  
GTGGCGAAGGCGCCCTTCTGGACGGCAACTGACGCTGAGACGCGAAAGCGTGGGGAGCAA  
ACAGGATTGGAGACCCCCGTAGTCC

>Otu24814

CCAGCCTATGGGTTGCTGCAGCAACGAATATTCCCCAATGCCCCGAAAGGGTGAGGGAGCG  
ACGCCGCGTGTTGGGACGAAGTCTTCGGGATGTAAACCACTGTTAGGGTTATGAAAGCGT  
AAGGGCCTAATACGCCCTGAGCTGATCTAGCCCAGAGAAAGGGACGGCTAACTCTGTGCC  
AGCAGCCGCGGTAATACAGAGGTCCCAAGCGTTACTGAGAATCACTGGGTTTAAAGGGTG  
TGTAGGTGGTCCGTTAAGTCCGTTGTGAAATCCCCTGGCTCAACCAGGGAACCTGCTTCGG  
ATACTGGCGGACTTGAGGCCGGTAGAGGTCCTGGAACCTGACGGTGGAGCGGTGAAATGC

GTAGATATCGTCAGGAACGCCGGTGGTGAAGACGGGTGACTGGGCCGGATCTGACACTGA  
GACACGAAAGCGTGGGGAGCGAACGGGATTAGATACCCTGGTAGTCC

>Otu24815

CCAGCCTACGGGTCGCTGCAGTGGGGAATTTTGC GCAATGGGGGAAACCCTGATCCAGCG  
ACGCCGCGTGAGTGATGAAGGCCTTCGGGTGTAAAGCTCTGTTCGGAGGGAACGAACAAG  
GGTGACCTAACACGTCATCCCCTGACGGTACTCTCAAAGGAAGCACCGGCTAACTCTGTG  
CCAGCAGCCGCGGTAAGACAGAGGGTGCAAGCGTTGTTTCGGAAGTACTGGGCGTAAAGGG  
AGTGTAGGCGGCAGAGTGTGTCCGACGTGAAATACCTCGGCTCAACCGAGGAAGTGC GTT  
GGATCCTACTTTGCTTGAGTGTGAGAGAGGGTGGCGGAATTGTCAGTGTAGAGGTGAAAT  
TCGTAGATACTGGCAGGAACACCGGAGGCGAAGGCGGCCACCTGGATCACTACTGACGCT  
GAAACTCGAAAGCGTGGGGAGCAAACAGGATTAGAGACCCGAGTAGTCC

>Otu24822

CCAGCCTACGGGGTGCTGCAGTGGGGAATATTGGACAATGGGCGCAAGCCTGATCCAGCC  
ATGCCGCGTGAGTGATGAAGGCCTTCGGGTGTAAAGCTCTTTTAGGTGGGACGATGATG  
ACGGTACCACCAGAATAAGCTCCGGCTAACTTCGTGCCAGCAGCCGCGGTAATACGAAGG  
GAGTTAGCGTTGTTTCGGAATTACTGGGCGTAAAGGGCGCGTAGGCGGCCAGACAAGTCAG  
GTGTGAAAGCCCTGGGCTCAACCCGGAATTGCGCTTGATACTGTTTGGCTAGAATTCGG  
TAGAGGTTGGTAGAATTGCCAGTGTAGAGGTGAAATTCGTAGAGATTGGCAAGAATACCC  
GTGGCGAAGGCGGCCAACTGGACCGACATTGACGCTGAGGCGCGAAAGCGTGGGGAGCAA  
ACAGGATTAGAGACCCGCGTAGTCC

>Otu24834

CCAGCCTACGGGGCGCTGCAGTCGAGAATTTTTCTCAATGGGCGAAAGCCTGAAGGAGCG  
ACGCCGCGTGGGGGATGAAGGGCTTCGGCCCGTAAACCCCTGTCATTTCGCGAACAAACCC  
TGCGATTTAATAGATCGCAGGCTGATTGTAGCGGAAGAGGAAGGGACGGCTAACTCTGTG  
CCAGCAGCCGCGGTAATACAGAGGTCCCAAGCGTTGTTTCGGAATCACTGGGCGTAAAGGG  
TGCGTAGGTGGCAGGGTAAGTTTGATGTGAAATCTCCGAGCTCAACTCGGAAATGGCATT  
GGAAACTGCTCTGCTTGAGGGTTGGAGGGGGGACTGGAATACTTGGTGTAGCAGTGAAAT  
GCGTAGATATCAAGTGGAACACCAGTGGCGGAGGCGAGTCCCTGGACAACCTCTGACACT  
GAGGCACGAAAGCTAGGGGAGCAAACAGGATTAGATACCCTCGTAGTCC

>Otu24849

CCAGCCTATGGGAGGCTGCAGTGGGGAATCTTGCAACAATGGGGGAAACCCTGATGCAGCG  
ACGCCGCGTGAGCGATGAAGCCCTTCGGGGTGTAAAGCTCTTTCGGCAGGGACGATTATG  
ACGGTACCTGCAGAAGCAGCTGCGGCTAACTACGTGCCAGCAGCCGCGGTAATACGTATG  
GGGCGAGCGTTGTTTCGGAATCATTGGGCGTAAAGGGCGTGTAGGCGGCTTGGCAAGCTTG  
GTGTGAAAGGTCACGGCTTAACCGTGAATGTGCACTGAGAAGTCCAGGCTGGAGTTTGTG  
GGGGGGAAGCTGGAATTCCTGGTGTAGGGGTGAAATCTGTAGATATCAGGAAGAACACCG  
ATGGCGAAGGCAAGCTTCTATCCAAAGACTGACGCTGAGGCGCGAAAGTGTGGGGAGCAA  
ACAGGATTAGAAACCCTCGTAGTCC

>Otu24856

CTAGCCTATGGGTGGCTGCAGTCGAGAATTTTTTCAACAATGGGCGCAAGCCTGATGGAGCG  
ACGCCGCGTGGGGGATGAATGGCTTCGGCTCGTAAACCCCTGTCATTTGCGAACAAATGCT  
TGCGATTTAATAAATCGCAAGTTGATAGTAGCAAAAGAGGAAGGGACGGCTAACTCTGTG  
CCAGCAGCCGCGGTAATACAGAGGTCCCAAGCGTTGTTTCGGAATCACTGGGCGTAAAGGG  
TGCGTAGGTGGCAAGGTAAGTTTGATGTGAAATCTCCGGGCTTAACCCGAAACTGCATT  
GAATACTATCTTGCTTGAGGGTTGGAGGGGGGACTGGAATACTTGGTGTAGCAGTGAAAT  
GCGTAGATATCAAGTGGAACACCAGTGGCGAAGGCGAGTCCCTGGACAACCTCTGACACT  
GAGGCACGAAAGCTAGGGGAGCAAACAGGATTAGAAACCCGAGTAGTCC

>Otu24858

CCAGCCTACGGGTGGCTCCAGTAAGGAATATTGGACAATGGTGGCAACACTGATCCAGCC  
ATGCCGCGTGCAAGGATGAAGGCGCTACGCGTTGTAAACTGCTTTTGTACGGGAGAAAACC  
CTCGCTCGTGAGCGAGGCTGATGGTACCGTAAGAATAAGCATCGGCTAACTTCGTGCCAG  
CAGCCGCGGTAATACGAAGGATGCAAGCGTTATCCGGATTTATTGGGTTTAAAGGGTGCG  
CAGGCGGAATGATAAGTCAGTGGTGAAATCCTACAGCTTAACTGTAGAACTGCCATTGAT  
ACTGTCGTTCTTGAGTACAGTTGGAGTGGGCGGAATGAGTCATGTAGCGGTGAAATGCTT  
AGATATGACACAGAACACCAGTCGCGAAGGCAGCTCGCTAAACTGTAACTGACGCTCATG  
CACGAAAGCGTGGGGATCAAACAGGATTAGATACCCTAGTAGTCC

>Otu24861

CCAGCCTACGGGTGGCTGCAGTGGGGAATATTGC GCAATGGGGGAAACCCTGACGCAGCG

ACGCCGCGTGAGCGATGAAGGCCTTCGGGTTGTAAAGCTCTGTTGTAAGGGAAGAAGTTC  
CTACTTAGTAATATGAGGTAGGGGTGACGGTACCTTACGAGGAAGCCCCGGCTAACTACG  
TGCCAGCAGCCGCGGTAAGACGTAGGGGGCGAGCGTTGTCCGGAATTACTGGGCGTAAAG  
AGCATGTAGGCGGATTATTAAGTCAGGTGTGAAAGACTGCGGCTCAACCGCAGGGTTGCA  
TCTGAAACTGGTAATCTTGAGGGCAGGAGAGGACAGTAGAATTCCTGGTGTAGCGGTGAA  
ATGCGTAGAAATCAGGAGGAATACCAGTGGCGAAGGCGACTGTCTGGACTGACCCTGACG  
CTGAGATGCGAAAGCGTGGGGAGCAAACAGGATTAGATAACCCCGTAGTCC

>Otu24898

CCAGCCTATGGGAGGCACCAGCTAAGAATATTCGCAATGGACGAAAGTCTGACGGAGCG  
ACGCCGCGTGATGACGAAGGCCGAAAGGTTGTAAAGTCTTTTGTGGGGAAGAATAAC  
CAGGGGAGGGAATGCCCCGTGGGATGACATGAACCGACGAATAAGCCTCGGCTAACTACGT  
GCCAGCAGCCGCGTAAACGTAGGAGGCAAGCGTTATCCGGATTCACTGGGCGTAAAGC  
GCGTGCAGGCGGTTTCGGTAAGTTGGGCGTGAAATCTCCCGGCTCAACTGGGAGAGGTCGT  
TCAATACTACCGGGCTAGAGAGCAGTAGAGGAAGATGGAATTCCTGGTGTAGTGGTGAAA  
TGCGTAGATATCGGGAGGAACACCAGTGGCGAAGGCGATCTTCTGGACTGTTTCTGACGC  
TCAGACGCGAAAGCTAGGGTAGTAAACGGGATTAGAAACCCTCGTAGTCC

>Otu24904

CCAGCCTATGGGTGGCTCCAGTGGGGAATCTTGACAATGGGGGCAACCCTGATGCAGCA  
ACGCCGCGTGAGGGATGAAGGCCTTCGGGTCGTAAACCTCTTTCGACTGGGAAAAATGGG  
CTGGTGAAAAGCCAGTTCTGATGGTACCGGTGGAAGAAGCCCCGGCCAACTACGTGCCAG  
CAGCCGCGGTAATACGTAGGGGGCGAGCGTTGTTTCGGAATTACTGGGCGTAAAGGGCGTG  
TAGGCGGCGCGGTAAGTTGGGCGTGAAATCCCCGGGCTTAACCCGGGGGGGCCGTTCAAG  
ACTGCCGTGCTAGGGTGCGGGAGAGGGAAGTGGAATTCCTGGTGTAGCAGTGAAATGCGT  
AGATATCGGGAGGAACACCTGTGGCGAAGGCGGCTTCCTGGACCGTAACCGACGCTGAGG  
CGCGAAAGCTAGGGGAGCAAACAGGATTAGAGACCCGAGTAGTCC

>Otu24905

CCAGCCTATGGGTGGCAGCAGTGGGGAATATTGGACAATGGGGGCAACCCTGATCCAGCA  
ATGCCGCGTGTGTGAAGAAGGCCTGCGGGTTGTAAAGCACTTTCGGCGGGGAGGAAGGTT  
TTTTTGGGGAATATCCAGAGAAATTTGACGTTACCCGCATAAGAAGCACCGGCTAACTCT  
GTGCCAGCAGCCGCGGTAATACAGAGGGTGCGAGCGTTAATCGGAATTACTGGGCGTAAA  
GGGCGCGTAGGTGGTTAATTAAGTCAGATGTGAAATCCCCGGGCTTAACCTGGGAATGGC  
ATATGAAACTGATTAGCTAGAGTTTGGGAGAGGGAAGTGGAATTTTCAGGTGTAGCGGTGA  
AATGCGTAGATATCTGAAGGAACACCAGTGGCGAAGGCGACTTCCTGGCCCGATACTGAC  
ACTGAGGCGCGAAAGCGTGGGGAGCAAACAGGATTAGAAACCCTAGTAGTCC

>Otu24917

CCAGCCTATGGGGTGCACCAGTGGGGAATATTGGACAATGGGCGAAAGCCTGATCCAGCC  
ATGCCGCGTGAGTGAAGAAGGCCTTCGGGTTGTAAAGCTCTTTCAGGTGGGACGATAATG  
ACGGTACCGGTAGAAGAAGCCCCGGCTAACTCTGTGCCAGCAGCCGCGGTAATACAGAGG  
GGGCAAGCGTTGTTTCGGAATTATTGGGCGTAAAGGGTGCGTAGGCGGTGCGGTAAGTCTT  
TTGTGAAATCTCCGGGCTCAACTCGGAGTCTGCAGGAGAACTGCCGTGCTTGAGTATGG  
GAGAGGTGAGTGGAATTCCTGGTGTAGCGGTGAAATGCGTAGATATCAGGAGGAACACCT  
GTGGCGAAAGCGGCTCACTGGACCATAACTGACGCTGAGGCACGAAAGCTAGGGGAGCAA  
ACAGGATTAGAAACCCTCGTAGTCC

>Otu24952

CCGCCTATGGGTGGCTGCAGTGGGGAATCTTGACAATGGGGGAAACCCTGATGCAGCAA  
CGCCGCGTGACGATGAAGGTCTTCGGATCGTAAAGTGCTTTTCTGAGAGATGAGAAAGG  
ACAGTATCTCAGGAATAAGTCTCGGCTAACTACGTGCCAGCAGCCGCGGTAACACGTAGG  
AGGCGAGCGTTATCCGGATTTACTGGGCGTAAAGCGTGTGCAGGCGGTCTAGCAAGTTGG  
ATGTGAAAGCTCCTGGCTCAACTAGGAGAGGTGCTTCAATACTGCCAGACTCGAGGATGG  
TAGAGGGAGGTGGAATTCAGAGTGTAGTGGTGAAATGCGTAGATATTCGGAGGAACACCA  
GTGGCGAAAGCGGCTCCTGGACCATTTCTGACGCTCATACACGAAAGCTAGGGGAGCAA  
ACGGGATTAGAAACCCTCGTAGTCC

>Otu24958

CCAGCCTATGGGGTGCTGCAGCGGGGAATATTGCGCAATGGGGGAAACCCTGACGCAGCA  
ACGCCGCGTGAAATGATGAAGGCCTTCGGGTTGTAAAGCTCTGTCAGGAGGGACGAAGCCA  
CTCGGGTGAATAGCCCAGAGGGTGACGGTACCTCCAGAGGAAGCCCCGGCTAACTACGTG  
CCAGCAGCCGCGGTAATACGTAGGGGGCGAGCGTTGTCCGGAATCATTGGGCGTAAAGCG  
CGTGTAGGCGGCTTGCCAAGTCCGATGTGAAATCTCGGGGCTCAACCCGAAACTGCATT

GGAAACTGGTTTGCTAGAGTCCGGAAGAGGAGAGTGGAATTCCTGGTGTAGCGGTGAAAT  
GCGCAGATATCAGGAAGAACACCGGTGGCGAAGGCGGCTCTCTGGGACGGTACTGACGCT  
GAGACGCGAAAGCGTGGGTAGCGAACAGGATTAGAGACCCCCGTAGTCC

>Otu24966

CCAGCCTATGGGACGCTCCAGAGGAGGATCATTCGCAATGGGCGAAAGCCTGACGGTGCG  
ACGCCGCGTGAGGGATGAAGGCCTTCGGGTGTAAACCTCTGTCAGGAGTTATGAATGAC  
GGGGACATTAATACTGTCTCCGTGTGACAAAGGCTCCAAAGGAAGCCACGGCTAACTACG  
TGCCAGCAGCCGCGGTAATACGTAGGTGGCAAGCGTTACTCGGTATCACTGGGCATAAAG  
GGCGTGTAGGCGGATGTGTAAGTCCGGTGTAAAAGCCCCGGCTCAACCGGGGAAAGCCA  
TCGGATACTGCGTGTCTAGAGTGCGGGAGGGGAGAGTGGAATCTTGGTGGAGCGGTGAA  
ATGCGTAGATATCAAGAGGAACGCCGGTGGCGAAAGCGGCTCTCTGGACCACAAGTACG  
CTGATGCACGAAAGCTAGGGGAGCAAACAGGATTAGATAACCCGAGTAGTCC

>Otu25002

GGACTACAGGGGTATCTAATCCCATTGCTCCCCTAGCTTTCGTTTCCTCAGCGTCAGTTA  
CGGCCCAGTAAGTCGCTACGCCACTGGTGTTCTTTCTGATATCTACGCATTTACCCGCT  
ACACCAGAAATTCCACTTACCTCTACCGCACTCCAGTCTACTAGTATCCAGTGCAGCCCC  
GGGGTTGAGCCCCGATTTTTTAACACCAGACTTGATAAACCGCCTACGAACTCTTTACGCC  
CAATAAATCCGGACAACGCTTGCACTCTACGTCTTACCGCGGCTGCTGGCACGTAGTTAG  
CCGATGCTTCCTTTGCTGGTACCGTCATTTTTTTCTTCCAGCCGACAGAAGTTTACACC  
CCAAAAGGCTTCTTCGTTACGCGGTGTGCTACGTACGTACGGCTTTCGCCCATTGCGTAAAA  
TTCCCCACTGCTGCACCCCGTAGGCTGG

>Otu25004

CCAGCCTACGGGATGCAGCAGTTGGGAATCTTGACAAATGGGGGAAACCCTGATGCAGCG  
ACGCCGCGTGAGGATGACGGGTCTAGGCCTGTAAACTCCTTTTATCGGGAAAGACTTAG  
GACGGTACCCGATGAATAAGGACCGGCTAACTACGTGCCAGCAGCCGCGGTAAGACGTAG  
GGTCCAAGCGTTATCCGGATTTACTGGGCGTAAAGAGCGCGTAGGCGGTCCGTTAAGTGA  
GAAGTGAATCTTCAGGGCTCAACCCGAAAAATGGCTTTTCATACTGGCGGACTTGAGGGA  
TGCAGAGGTATGTGGAATTCCTGGTGTAGCGGTGAAATGCGTTGATATCAGGAGGAACAC  
CCATGGCGAAGGCAGCATACTGGGCATCATCTGACGCTGAGGCGCGAAAGCGTGGGTAGC  
AAACAGGATTAGATAACCCCTTGTAAGTCC

>Otu25016

CCAGCCTACGGGGCGCTGCAGTGGGAATATTGGACAATGGGCGCAAGCCTGATCCAGCC  
ATGCCGCGTGAGTGATGAAGGCCTTAGGGTTGTAAAGCTCTTTTACTCGGGAAGATAATG  
ACGGTACCGAGAGAATAAGCCCCGGCTAACTTCGTACCAGCAGCCGCGGTAATACGAAGG  
GGGCTAGCGTTGTTTCGGATTTACTGGGCGTAAAGCGCACGTAGGCGGATCTTTAAGTCAG  
GGGTGAAATCCCGGGGCTCAACCTCGGAAGTGCCTTTGATACTGGGGATCTTGAGTCCGG  
AAGAGGTGAGTGGAAGTGCAGTGTAGAGGTGAAATTCGTAGATATTGGGAAGAACACCG  
GTGGCGAAGGCGGCGACCTGGTCCTTTACTGACGCTGAGGCGCGAAAGCGTGGGGAGCAA  
ACAGGATTAGAAACCCTTGTAAGTCC

>Otu25021

CCAGCCTATGGGTGGCAGCAGTAACGAATCTTCCGCAATGTACGAAAGTATGACGGAGCG  
ACGCCGCGTGTAGGACGAAGCCCTTCGGGGTGTAAACTACTGTCAAGGGTTAGAAAGTTC  
TGATCAACCCCTAGAGGAAGGCACGGCTAACTCTGTGCCAGCAGCCGCGGTAAGACAGAGG  
TGCCAAGCGTTAGGCGGAATCACTGGGCTTAAAGCGTGTGTAGGTGGATGTCTAAGTACC  
TTGTGAAATCCCATAGCTCAACTATGGAAGTGCCTCGGTATACTGGACGTCTTGAGCCACT  
TAGGGGCTACCGGAACAAATGGTGGAGCGGTGAAATGCGTAGATATCATTTGGAACGCCA  
ATGGTGAAAACAGGTAGCTGGGAGTGTGCTGACACTGAGACACGAAAGCCAGGGGAGCGA  
ACGGGATTAGAGACCCCTCGTAGTCC

>Otu25040

CCAGCCTACGGGTGGCTGCAGCGGGGAATATTGGACAATGGGCGCAAGCCTGATCCAGCA  
ATGCCGCGTAGATGAAGAAGGTTTTTCGGATTGTAAAGTCCTTTTCGGCGGGGACGATGATG  
ACGGTACCCGCGAGAAGAAGCCCCGGCTAACTTCGTGCCAGCAGCCGCGGTAATACGAAGG  
CGGCTAGCGTTGCTCGGAATGACTGGGCGTAAAGGGCGCGTAGGCGGTTTGATTGGTTAG  
GCGTGAAATTCCTGGGCTCAACCTGGGAAGTGCCTTTAATACAGTCAGACTTGAGTTCGG  
AAGAGGGTCGTGGAATTCCTAGTGTAGAGGTGAAATTCGTAGATATTGGGAAGAACACCG  
GTGGCGAAGGCGGCGACCTGGTCCGATACTGACGCTGAGGCGCGAAAGCGTGGGGAGCAA  
ACAGGATTAGAGACCCGTGTAGTCC

>Otu25059

CCAGCCTACGGGTGGCTCCAGTGAGGAGTATTGCTCAATGGGCGAAAGCCTGAAGCAGCG  
ACGCCGCGTGAGGGATGAAATCCGTTAGGATGTAAACCTCTTTTGCAGGGGAAGAATGTT  
CCGGTTTTCGATCGGAATTGACGGTACTCTGCGAATAAGCACCGGCAAACCTACGTGCCAGC  
AGCCGCGGTAAATACGTAGGGTGCGAGCGTTGTCCGGAATTACTGGGTGTAAAGGGTCCGC  
AGGCGGACATGTAAGTCGATGGTGAAATCTCCCGGCTCAACCGGGAGTCTGCTGTTGATA  
CTATATGTCTTGAGTACGAGAGAGGAAAACGGAATTCATGGTGTAGCGGTGAAATGCGTA  
GAGATCATGAAGAACCCGGTAGCGAAGGCGTTTTCTGGCTCGTAACTGACGCTCAGGG  
ACGAAAGCGTGGGTAGCAAACAGGATTAGAAACCCTAGTAGTCC

>Otu25114

CAGCCTATGGGTGGCAGCAGTGGGGAATATTGGACAATGGGCGCAAGCCTGATCCAGCCA  
TGCCGCGTGTGTGATGAAGGCCTTAGGGTTGTAAAGCACTTTCGCCTGCGAGGATAATGA  
CGGTAGCAGGATAAGAAGCCCCGGCTAACTTCGTGCCAGCAGCCGCGGTAAATACGAAGGG  
GGTAGCGTTGTTCGGAATCACTGGGCGTAAAGCGCACGTAGGCGGACTTTTAAGTCAGA  
GGTGAAGCCTGGAGCTCAACTTCAGAACTGCCTTTGATACTGGAAGTCTTGAGTCCGGT  
AGAGGTGAGTGGAAGTCTAGTGTAGAGGTGAAATTCGTAGATATTAGCAAGAACACCAG  
TGGCGAAGGCGGCTCTCTGGACCGTAACTGACGCTGAGACACGAAAGCGTGGGTAGCAAA  
CAGGATTAGAGACCCAGTAGTCC

>Otu25119

CCAGCCTACGGGACGCACCAGTGAGGAATTTTCCGCAATGGGCGCAAGCCTGACGGAGCG  
ACGCCGCGTGAGGACGAAGTCTTTCGGGATGTAAACTCCTTTTGCCTGGGACGAAAAAA  
ATGACGGTACCAGGTGAATAAGCCTCGGCTAACTACGTGCCAGCAGCCGCGGTAAAGCGT  
AGGAGGCAAGCGTTGTTCGGAATTACTGGGCGTAAAGCGTCCGTAGGCGGACGGGTAAAGT  
GGCTGGTTAAAGCCCCGGGGCTCAACCCCGGCGGTGCCAGCTAAACTGCTCGTCTGGAGGT  
CGGCAGAGGGTGATGGAATTCCTGGTGTAGCGGTGAAATGCGTAGATATCGGGAGGAACA  
CCAGTGGCGCAAGCGATCACCTGGGCTAGACCTGACGCTGAGGGACGAAAGCGTGGGGAG  
CAAACGGGATTAGATACCCTTGTAGTCC

>Otu25120

CCAATGGGGGGCTGCAGTGGGGAATTTTGGACAATGGGGGCAACCCTGATCCAGCCATGC  
CGCGTGAGTGAAGAAGGCCTTCGGGTTGTAAAGCTCTTTCGGTAGGAACGAAACGGTTAC  
GGCTAATACCCGTGACTACTGACGGTACTTACAGAAGAAGCACCGGCTAACTACGTGCCA  
GCAGCCGCGGTAAATACGTAGGGTGCGAGCGTTAATCGGAATTACTGGGCGTAAAGCGTGC  
GCAGGCGGTTATTTAAGTCAGGTGTGAAAGCCCTGGGCTTAACCTAGGAATTGCGCTTGA  
GACTGGATAGCTTGGAGTGTGGCAGAGGGAGGTGGAATTCACGTGTAGCAGTGAAATGC  
GTAGAGATGTGGAGGAACACCGATGGCGAAGGCAGCCTCCTGGGCCAGCACTGACGCTCA  
TGCACGAAAGCGTGGGGAGCAAACAGGATTAGAGACCCCTGTAGTCC

>Otu25136

CCAGCCTACGGGACGCTGCAGTGGGGAATTTTGCGCAATGGGGGAAACCCTGACGCAGCA  
ACGCCGCGTGAGTGAAGAAGGCCTTCGGGTTGTAAAGCTCTTTCGGTTGGGAAGAAGGGG  
AGCACAGTTAATAAGTGTGTTCTTTGATGGTACCAAAGAAGAAGCACCGGCAAACCTTCG  
TGCCAGCAGCCGCGGTAAATACGAAGGGTGCGAGCGTTGTTTCGGAATTATTGGGCGTAAAG  
GGTGCGTAGGCGGTTTTGTAAAGTCTTATGTGAAATCTATGGGCTCAACTCATAGACTGCA  
TGAGAAACTGCAGGGCTTGAGTGTGGGAGAGGTGAGTGGAATTTCCGGTGTAGCGGTGAA  
ATGCGTAGATATCGGAAGGAACACCTGTGGCGAAAGCGGCTCACTGGACCATAACTGACG  
CTGAGGCACGAAAGCTAGGGGAGCAAACAGGATTAGAAACCCGTGTAGTCC

>Otu25146

CCAGCCTATGGGTCGCTCCAGTGGGGAATTTTGCGCAATGGGGGAAACCCTGACGCAGCA  
ACGCCGCGTGAGTGAAGCCCTTGGGGCGTAAACTCCTTTCGACCAAGACGATAATG  
ACGGTACTGGTGGAAGAAGCACCGGCTAACTCTGTGCCAGCAGCCGCGGTAAATACAGAGG  
GTGCGAGCGTTGTTTCGGAATTATTGGGCGTAAAGGGCGCGTAGGCGGTGCCACAAGTCAC  
TTGTGAAATCTCTGGGCTTAACCCAGAGCCTGCAGGCGAAACTGTGGTGTGAGTATGG  
GAGAGGTGCGTGGAATTCCTGGTGTAGCGGTGAAATGCGTAGATATCGGAAGGAACACCA  
GTGGCGAAAGCGACTTCCTGGTTCGAATACTGACGTTTCATGTGCGAAAGCGTGGGGAGCAA  
ACAGGATTAGAAACCCGCGTAGTCC

>Otu25154

CCAGCCTACGGGGGGCACCAAGTCGAGGATCTTTGGCAATGGGCGCAAGCCTGACCAAGCG  
ACGCCGCGTGTGCGATGAAGGCCTTCGGGTTGTAAAGCACTGTGAGGGGGAGGAAGCCG  
CAAGGTTGACCGATCCCTGGAGGAAGCACGGGCTAAGTTCGTGCCAGCAGCCGCGGTAAAG  
ACGAACCGTGCGAACGTTGTTTCGGAATCACTGGGCTTAAAGGGCGCGTAGGCGGCTCATC

AAGTCGGGGGTGAAATACTTCAGCTTAACTGGAGAAGTGCCTTCGATACTGGTGGGCTTG  
AGGGAGGTAGGAGTCTTTGGAACCTTCTGGTGGAGCGGTGAAATGCGTTGATATCAGAAAG  
AACGCCGGTGGCGAAAGCGAAGGACTGGACCTCTTCTGACGCTGAGGCGCGAAAGCCAGG  
GGAGCAAACGGGATTAGAAACCCGCGTAGTCC

>Otu25167

CCAGCCTACGGGGGGCTGCAGTCGAGAATCTTTCGCAATGGGCGAAAGCCTGACGAAGCG  
ACGCTGTGTGAGTGATGAAGGCCTTCGGGTGTAAAGCTCTTTCGCTTGGAACAAGAGA  
GGTTGATGAATAATCAGCTAATTTGAGGGTACTTAAGTAAAGAAGCACCGGCTAACTCCG  
TGCCAGCAGCTGCGGTAATACGGAGGGTGCAAGCATTAAATCGGATTTATTGGGCGTAAAG  
GGCGCGTAGGTGGGTTTTGTAAAGTCAAGTGTGAAATTCCGGGGCTCAACTTCGGAAGTGA  
CGTGAAGACTACAAGTCTTGAGGATTGGCGGAGAAAACGGAATTCCACAAGTAGCGGTGAA  
ATGCGTAGATATGTGGAAGAACACCGGTGGCGAAGGCGGTTTTCTAGCTTATTCCTGACA  
CTGAGGCGCGAAAGCAAGGGGATCAAACAGGATTAGATACCCTCGTAGTCC

>Otu25174

CCAGCCTATGGGAGGCAGCAGTGGGGAATATTGGACAATGGGGGAAACCCTGATCCAGCG  
ACGCCGCGTGCAGGATGAAGTGCTTCGGTATGTAAACTGCTTTTTCGGGACTAAGAAGTTT  
ATTGACTAGTCCGAGAATAAGAGGTTGCTAAACTCGTGCCAGCAGCAGCGGTAATACGAG  
TGCTCAAGCGTTATCCGGAATCATTGGGCGTAAAGGGTGTGTAGGTGGTCGCGTTAGTC  
TCTCGTTAAATTCTTCGGCTTAACCGGGGGCCTGCGGGGAAACGGCGCGACTTGAGGGT  
GCGAGGGGTGAATGGAAGTCAATGGTGTAGGGGTGAAATCCGTTGATATCATGGGGAACAC  
CAAAAGCGAAGGCAATTCAGTGGCGCATTCTTGACACTGAAACACGAAAGCGTGGGTAGC  
GAATGGGATTAGAAACCCAGTAGTCC

>Otu25196

CCAGCCTATGGGTGGCTGCAGTGGGGAATATTGGACAATGGGGGAAACCCTGATCCAGCG  
ACGCCGCGTGAAGTGAAGAAGGCCTTCGGGTGTAAAGCTCTTTCGGCCGGAAGAAATCG  
CATCAGCTAATACCTGGTGTGGATGACGGTACCGGAATAAGAAGCACCGGCTAACTACGT  
GCCAGCAGCCGCGTAATACGTAGGGTGCGAGCGTTAATCGGAATTACTGGGCGTAAAGC  
GTGCGCAGGCGGTTGTGTAAAGACAGGCGTGAAATCCCCGGGCTCAACCTGGGAAGTGC  
TTGTGACTGCACATCTAGAGTACGGCAGAGGGGGGTGGAATTCACGTGTAGCAGTGAAA  
TGCGTAGAGATGTGGAGGAACACCGATGGCGAAGGCAGCCCCCTGGGCCGATACTGACGC  
TCATGCACGAAAGCGTGGGTAGCAAACAGGATTAGAAACCCGAGTAGTCC

>Otu25204

CCAGCCTACGGGTTCGCACCAGTGGGGAATATTGGACAATGGGCGAAAGCCTGATCCAGCG  
ACGCCGCGTGGATGATGAAGGCCTTCGGGTGTAAAGTCCTTTCGGTAGGGAAGATAATG  
ACGGTACCTACAAAAGAAGCTCCGGCTAACTTCGTGCCAGCAGCCGCGGTAATACGAAGG  
GAGCTAGCGTTACTCGGAATCATTGGGCGTAAGGCGTGCGTAGGCGGTCTTGTAAGTTAG  
AAGTGAAATCCTGGGGCTCAACCCAGAACTGCTTTTAATACTGCTCGACTAGAATACTT  
GAGGGGACAGTAGAATTCCTAGTGTAGGGGTGAAATCCGTAGATATTAGGAGGAATACCA  
GTGGCGAAAGCGACTGTCTGGCAAGTTATTGACGCTGAGGAACGAAAGCCAGGGGAGCAA  
ATGGGATTAGATACCCTAGTAGTCC

>Otu25229

CCAGCCTACGGGTTGCACCAGTTGGGAATCTTGACAATGGGGGCAACCCTGATGCAGCG  
ACGCCGCGTGGAGGATGTGCGGTCTAGACCTGTAAACTCCTTTTCCCCGGAAGACTTAG  
GACGGTGCCGGGGGAATAAGCACCGGCTAACTGCGTGCCAGCAGCCGCGGTAGACGTAGG  
GTGCAAGCGTTGTCCGATTTACTGGGCGTAAAGAGCGCGTAGGCGGCTCGTTAAGTGTG  
AAGTGAAATCCCTGGGCTCAACTCAGGAAGTCTTTACATACTGGCGAGCTTGAGGGATG  
CAGAGGTTTGTGGAATTCCTGGTGTAAACGGTGAAATGTGTTGATATCAGGAGGAACACCC  
ATGGCGAAGGCAGCAAACCTGGGCATTTCTGACGCTGAGGCGCGAAAGCGTGGGTAGCAA  
ACAGGATTAGATACCCCTGTAGTCC

>Otu25275

CCAGCCTACGGGGGGCTGCAGTGGGGAATCTTGCGCAATGGACGAAAGTCTGACGCAGCC  
ACGCCGCGTGAAGTGAAGAAGGCCTTCGGGTGTAAAGCTCTGTGCGCGGGGACGAAAAGC  
TAAACAGTTAAGAGCTGGTTAGCCTGACGGTACCGCGAAAGGAAGCACCGGCTAACTCCG  
TGCCAGCAGCCGCGTAATACGGAGGGTGCAAGCGTTGCTCGGAATTATTGGGCGTAAAG  
GGTAGGTAGGTGGTCTCATTTGTACAGGGGTGAAAGCCTTGGGCTTAACTCAAGAAGTGCC  
CCTGAAACGGTGAGACTCGAGTTCTGGAGAGGGTTCGTGGAATTCCCGGTGTAGCGGTGAA  
ATGCGTAGAGATCGGGAGGAACACCAGAGGCGAAGGCGGCGACCTGGACAGATACTGACA  
CTCAACTACGAAAGCGTGGGGAGCAAACAGGATTAGAAACCCCGTAGTCC



>Otu25283

CCAGCTTATGGGGCGCTGCAGGCGCGCAAACTCCACACTGCGCGGAAGCGTGATGGGGGG  
AATCTGAGCGGTTCACTTCGGTGAACCTTTTGCCAAGTGTAGCAAGCTTGGCGAATAAGT  
GCCGGGCAAGACCGGTGGCAGCCGCCACGGTAATACCGGCGGCACAAGTGGTGTCCACGA  
TTATTGGGCTTAAAGCGCTCGTAGCTGGCCAAGGCCGTCTAATGTGAAATATTGGTGCTC  
AACATCAATGCGTGCATTAGATATCCCTTGGCTTGGGAGTGGGTGAGGTCAGGAGTACTT  
ATGGGGAAGGGGTAAAATCCTATAATCCTATAAGGACTAACGGTGGCGAAGGCGCCTGAC  
TAGAACACATCCGACAGTGAGGAGCGAAGGCTAGGAGAACGAATCGGATTAGAAACCCCA  
GTAGTCC

>Otu25295

CCAGCCTACGGGGGGCTGCAGTAGGGAATTTTCCACAATGGGCGCAAGCCTGATGGAGCA  
ACGCCGCGTGCAGGATGAAGGCCTTCGGGTCGTAAACTGCTTTTATATGTGACGATTATG  
ACGGTAGCATATGAATAAGGATCGGCTAACTCCGTGCCAGCAGCCGCGGTTCATACGGAGG  
ATCCAAGCGTTATCCGGAATTACCGGGCGTAAAGAGTTGCGTAGGTGGCATGGTAAGTTG  
GTAGTGAAAGCCTGGGGCTCAACCCCTTACACATTACCAAACTGCCAAGCTAGAGGATG  
AGAGAGGTTATTGGAATTCCTAGTGTAGGAGTGAAATCCGTAGATATTAGGAGGAACACC  
GATGGCGTAGGCAGATAACTGGCTCATTCCTGACACTAAGGCACGAAAGCGTGGGTAGCA  
AACGGGATTAGAAACCCCTTGTAGTCC

>Otu25297

CCAGCCTATGGGGGGCACCAGTGGGGAATATTGGACAATGGGGGAAACCCCTGATCGAGCG  
ACGCCGCGTGGGGGATGACGCATTTTCGGTGTGTAAACCCCTTTTCTGGGGGACGAGAATG  
GACGGTACCCAGGAATCAGTCTCGGCTAACTACGTGCCAGCAGCCGCGGTAATACGTAG  
GAGGCAAGCGTTGTCCGGAGTTACTGGGCGTAAAGCGTGTGTAGGCGGTATCGTGCGTCT  
GTGGTGAAATCTCCTGGCTTACCTGGGAGGGGGGCCACGGATACGGCGAACTTGAGGGCG  
TGAGAGGCGAGTAGAACTCCCGGTGGAACAGTGAAATGTGTAGAGATCGGGAAGAATACC  
AGTGGTGCAGACGGCTCGCTGGCGCGTACCTGACGCTGAGACACGAAAGCTTGGGGAGCA  
AACAGGATTAGATACCCCGTAGTCC

>Otu25315

CCAGCCTATGGGATGCTGCAGTAGGGAATTTTCCGCAATGGGCGAAAGCCTGACGGAGCA  
ACGCCGCGTGAGGGATGAAGGTTTTTCGGATCGTAAACCTCTGTCTTCAGGGACGATAATG  
ACGGTACCTGAGGAGGAAGCCACGGCTAACTACGTGCCAGCAGCCGCGGTAATACGTAGG  
TGGAAGCGTTGTCCGGAATTACTGGGCGTAAAGGGCGTGTAGGCGGCCATTTAAGTCAG  
GCGTGAAATCCATGGGCATAACCCATGAATTGCGTTTGAACTGGACGGCTTGAGGATCG  
GAGAGGGCAGTGGAATTCACAGTGTAGCGGTGAAATGCGTAGATATTGGGAGGGACACCA  
GTGGCGAAGGCGACTGCCTGGACGACACCTGACGCTGAGGCGCGAAAGCTAGGGGAGCAA  
ACGGGATTAGAAACCCTAGTAGTCC

>Otu25320

CCAGCCTATGGGGTGCTGCAGTGGGGAATCTTGACACAATGGAGGAAACTCTGATGCAGCG  
ACACCGCGTGAGCGAAGAAGCCCTTTGGGGTGTAAGCTCTGTTCGGCTGGAACGAAAAAA  
ATGACGGTACCAGCAAAGGAAGCATCGGCTAACTACGTGCCAGCAGCCGCGGTAAGACGT  
AGGATGCGAGCGTTGTCCGGATTTATTGGGCGTAAAGAGTTCGTAGGTGGTTTGTAAAGT  
CTGATGTTAAAGATCGGGGCTCAACCTCGGGACAGCATTGGATACTGGCAGACTGGAGTG  
TAGTAGAGGCAAGCGGAATTCCACAGTGTAGCGGTGAAATGCGTAGATATTGGGAAGAACA  
CCAGTGGCGTAAGCGGCTTGTCTGGGCTATAACTGACACTGAGGAACGAAAGCCAGGGGAG  
CGAATGGGATTAGATACCCTGGTAGTCC

>Otu25329

CCAGCCTATGGGGGGCTGCAGTGGAGAATCTTGGGCAATGGAGAAACCTCTGACCCAGTG  
AGAGTACATGCATGATGAAGGCGGTAGTTTTCTGTAAAGTGCTTTCGGTGACGGAGACTA  
TACCATCAGTCGCAATAAGAAGCGCCGGCTAATTCGTGCCAGCAGCCGCGGTAATACGA  
AAGGCGCGGGCGTTATTCGTTTTGATTGGGTGTAAAGGGTACGTAGGTGGTTGAAGGTAG  
AAGTTTAGGTCAAAAGTGCGGAGTGTTTCTACGCAGTGGCATATTCTAGATTTCATCTGA  
GTTATGGAGAGGTCGGGGCAATTTCTTGTGTAGGGGTAAATCCTGCCATATAAGAACGA  
ACGCCAGCTGGCAGAGGCGCCTTTCTATCTATAACTGACGCTAAGGTACGGAAGCGTGGG  
GATCAGACAGGATTAGAGACCCGTGTAGTCC

>Otu25407

CCAGCCTACGGGTCGCTGCAGTCGAGAATCTTCGGCAATGGGCGCAAGCCTGACCGAGCG  
ACGCCGCGTGCGGGATGAAGGCCTTCGGGTTGTAAACCGCCGTCGGAGTGGAGGAGATT  
TAGGGGGCAATCCCTCTAGATTGACTAATACTCAGAGGAAGGACGGGCTAAGTTTCGTGCC

AGCAGCCGCGGTAAGACGAACCGTCCAAACGTTATTCGGAATTACTGGGCTTAAAGGGTG  
CGTAGGCGGCTCAGAAAGTAGGGTGTGAAAAGCCCTCGGCTCAACCGAGGAATTGCGCCCT  
AAACTACTGGGCTTGAGGAAGGCAGAGGTAAGCGGAACCTTAGGGTGGAGCGGTGAAATGC  
GTTGATATCCTAAGGAACACCAGGAGCGAAAGCGGCTTACTGGGCCTTTTCTGACGCTGA  
GGCACGAAAGCTAGGGGAGCGAACGGGATTAGAAACCCCTCGTAGTCC

>Otu25453

CCAGCCTATGGGGGGCAGCAGTGGGGAATATTGGACAATGGGGGCAACCCTGATCCAGCG  
ATGCCGCGTGGGTGAAGAAGGCCTTCGGGTGTAAAGCCCTTTAGGTTGGGAAGAAGTGT  
ACGTAGTGAATAGCTACGTATGTTGACGGTACCGACAGAATAAGCACCGGCAAACCTCTGT  
GCCAGCAGCCGCGGTAATACAGAGGGTGCAGCGTTAATCGGAATTACTGGGCGTAAAGG  
GCGCGTAGGCGGTGATGAGAGTGTGATGTGAAAGCCCCGGGCTTAACCTGGGAAGAGCAT  
CGCAAACGTCATTACTGGAGTATAAGAGAGGGTGGTGGAATTTCCGGTGTAGCGGTGAAA  
TGCGTAGAGATCGGAAGGAACGTCAATGGCGAAGGCAGCCACCTGGATTAATACTGACGC  
TGAGGCGCGAAAGCTGGGGATCAAACAGGATTAGAGACCCGGGTAGTCC

>Otu25475

CCAGCCTATGGGGGGCACCAGTCGAGAATTTTTTCAACAATGGGGGGAAACCCTGATGGAGC  
GACGCCGCGTGGGGGATGAATGGCTTCGGCCCGTAAACCCCTGTCATTTGCGAACAAACC  
TTTTACCTAACACGTGAAAAGCTGATTGTAGCGGAAGAGGAAGGGACGGCTAACTCTGT  
GCCAGCAGCCGCGGTAATACAGAGGTCCCAAGCGTTGTTTCGGATTACTGGGCGTAAAGG  
GCGCGTAGGTGGCCGGGTAAAGTCTGATGTGAAAGCTCGGAGCTTAACCTCCGAAATGGCAT  
TGGATACTATCCGGCTGGAGGGTTCGGAGGGGGGACTGGAATTTCTCGGTGTAGCAGTGAAA  
TGCGTAGATATCGAGAGGAACACCAGTGGCGAAGGCGAGTCCCTGGACGACTCCTGACAC  
TGAGGCGCGAAAGCTAGGGGAGCAAACAGGATTAGAGACCCGCGTAGTCC

>Otu25541

CCAGCCTACGGGGTGCAGCAGTAAGGGATATTGCACAATGGGCGAAAGCCTGATGCAGCA  
ACGCCGCGTGGAGGAAGAAGGCCTTCGGGTCTGTAACCTCCTTTTCTCACTGACGAGGAAG  
GACGGTAGGTGAGGAATAAGTCACGGCTAACTACGTGCCAGCAGCCGCGGTAAAACGTAG  
GTGGCAAGCGTTATCCGGATTTACTGGGCGTAAAGGGTGTGCAGGCGGGCGGTCAAGTGG  
TGTATGAAATATCCTGGCTCAACCGGGAGAGGTTATGCCAGACTGACCGTCTTGAGTGGC  
AGAGAGGGGCGTGGAATTCGGGTGTAGTGGTGAATGCCGTAGATATTCAGAGGAACACC  
AGTGGCGAAAGCGGCCTCCTGGACCATTTCTGACGCTCATACGCGAAAGCTAGGGTAGCA  
AACGGGATTAGAAACCCTTGTAGTCC

>Otu25550

CCAGCCTATGGGAGGCTGCAGTAGGGAATATTGGTCAATGGGCACAAGCCTGAACCAGCC  
ATGCCGCGTGCAGGATGAAGGCCCTCTGGGTCTGTAACCTGCTTTTATATGGGAATAAAAA  
AGTCCTTGCGAGGACTCTTGAAGGTACCATAAGAATAAGCACCGGCTAACTCCGTGCTAG  
CAGCCGCGGTAATACGGAGGGTGCAAGCGTTATCCGGATTTACTGGGTTTAAAGGGTGCG  
TAGGCGGCTTTTTAAGTCAGTGGTGAATCCTAGTGCTTAACACTAGAACGGCCATTGAT  
ACTGGAGAGCTTGAGTCAAGGAGAGGTAAGCAGAATTTATGGTGTAGCAGTGAAATGCTT  
AGATACCATAAGGAATACCAATAGCGAAGGCAGCTTACTGGCCTTGCACTGACGCTGAGG  
CACGAAAGCGTGGGGAGCAAACAGGATTAGAAACCCTAGTAGTCC

>Otu25561

CCAGCCTATGGGGGGCAGCAGTCGGGAAAAATTTTGCAATGCGCGCAAGCGTGACAGAGCA  
AGTCAGAGTGGTTTTCCGTATTGGAACACCTTTTGTGTGATGTAGAAATTCATACGAATA  
AGGAGTGGGAGAGACTGGTGCCAGCCGCCGCGGTAATCCAGCACTCCAAGTCGCAGCCA  
CAATTATTGGGTCTAAAACATCCGTAGCTTGCTTTGTAAAGTCTTTTGTCAAATCGGGCAT  
CTTAAGTGTCCGGCGAGCAAAAGATACTGCTTAGCTAGAGACCGGGAGATGTAAGGAGTA  
TGAATTAGGTAGCGGTAAAATGCGTTGATCTTTTTCAGACTAACAAACAGCGAAGGCACCT  
TACAAGAACGGATCTGACAGTGAGGGATGAAGGCTAGGGGCGCAAATTTGATTAGATACC  
CCTGTAGTCC

>Otu25570

CCAGCCTATGGGGGGCAGCAGTTTCGAATTATTCACAATGGGCGAAAGCCTGATGGTGCG  
ACGCCGCGTGAGGGATGAAGGCTTCGGATTGTAAACCTCTGTCACCGGGGAAGAAACAC  
CGCGAGTTAACAGCGAACGGTTTGACTTAACCCGGAGAGGAAGCAGTGGCTAACTCTGTG  
CCAGCAGCCGCGGTAATACAGAGACTGCAAGCGTTATTCGGATTCACTGGGCGTAAAGGG  
TGCGTAGGCGGCCGCATGTGTGATGTGAAAGCCTGGGGCTCAACCCAGAAATTGCGTC  
TGAAACTGTGCGGCTAGAGTGCCGGAGAGGATAGCGGAATTCACGGTGTAGCAGTGAAAT  
CGGTAGATATCGTGAAGAACACCAGCGGCGAAGGCGGCTATCTGGAAGGCAACTGACGCT

CAGGCACGAAAGCGTGGGGAGCAAAAGGGATTAGATACCCCCGTAGTCC

>Otu25597

CCAGCCTATGGGTGGCAGCAGTGGGGAATTTTTCACAATGGGCGCAAGCCTGATGGAGCG  
ACGCCGCGTGAGCGATGAAGCCCTTCGGGGTGTAAGCTCTTTCGGCAGGGACGATAATG  
ACGGTACCTGCAGAAGAAGCTGCGGCTAACTACGTGCCAGCAGCCGCGGTAATACGTAGG  
CAGCAAGCGTTGTTCCGAATTACTGGGCGTAAAGAGTGCGTAGGCGGTTTGTTAAGTTTG  
GTGTGAAATCTCCCGGCTTAAC TGGGAGGGTGCGCCGAAAAC TGCCGAGCTAGAGTGTGG  
GATAGGGAAGTGGAATTCCTGGTGTAGCGGTGAAATGCGTAGATATCAGGAGGAACACCT  
GTGGCGAAAGCGGCTCACTGGACCATAACTGACGCTGATGCACGAAAGCTAGGGGAGCAA  
ACAGGATTAGATACCCGCGTAGTCC

>Otu25602

CCAGCCTACGGGGGGCAGCAGCTAAGAATCTTCCGCAATGGGGGAAACCCTGACGGAGCG  
ACGCCGCGTGGAAGATGAAGGCCGAAAGGTTGTAAATTCCTTTTATACGGGAAGAATAAG  
TGTATTGAGAGAAACGGTGCATGATGACGGTACCGTATGAATAAGCCCCGGCTAACTTCG  
TGCCAGCAGCCGCGGTAATACGAAGGGGGCTAGCGTTGCTCGGAATCACTGGGCGTAAAG  
CGTACGCAGGCGGATTGATAAGTCAGGGGTGAAATCCCGGAGCTCAACTTCGGAATTGCC  
TTTGATACTGTCTATCTTCGAGTTCGGGAGAGGTTGGCGGAATTCCTAGTGTAGAGGTGA  
AATTCGTAGATATTAGGAAGTACACCAGTGGCGAAGGCGGCCAACTGGCCCCGATACTGAC  
GCTCATGTACGAAAGCGTGGGGAGCAAACAGGATTAGAGACCCGCGTAGTCC

>Otu25635

CCAGCCTACGGGGGGCTCCAGCAGGGAATATTGGTAATCTGCGAAAGCGGGAACCAGCAA  
CGCCGCGTGTGCGATGAAGGCCTTCGGGTGCTAAAGCACTTTTCGAGGGGATGAGGAAGG  
ACAGTACCCTCGGAATAAGTCTCGGCTAACTACGTGCCAGCAGCCGCGGTAACACGTAGG  
AGACGAGCGTTATCCGGATTTACTGGGCGTAAAGCGTGTGCAGGCGGTTTCGTTAAGTTGG  
GCGTGAAATCTCCTGGCTTAAC TAGGAGAGGTCGTTCAATACTACCAGACTTGAGAGCAG  
TAGAGGAAGATGGAATTCCTGGTGTAGTGGTGAAATGCGTAGATATCGGGAGGAACACCA  
GTGGCGAAGGCGATCTTCTGGACTGTTTCTGACGCTCATACACGAAAGCTAGGGTAGTAA  
ACGGGATTAGAGACCCCAGTAGTCC

>Otu25648

CCAGCCTACGGGTGGCACCAGTGGGGAATATTGCACAATGGGCGCAAGCCTGATGCAGCG  
ATGCCGCGTGTGTGAAGAAGGCCTTCGGGTGTAAAGCACTTTTGTGAGGAACGAAACGG  
ATTGAGCTAATACCTTGATCTAATGACGGTACCTGAAGAATAAGCACCGGCTAACTACGT  
GCCAGCAGCCGCGGTAATACGTAGGGTGCAAGCGTTAATCGGAATTACTGGGCGTAAAGC  
GTGCGCAGGCGGTTTTGTAAAGACAGATGTGAAATGCCCGGGCTCAACCTGGGAACTGCAT  
TTGTGACTGCAAGGCTAGAATTTGGCAGAGGGGGGTAGAATTCACGTGTAGCAGTGAAA  
TGCGTAGATATGTGGAGGAGTACCGATGGCGAAGGCAGCCCCCTGGGCTAAAATTGACGC  
TCATGCACGAAAGCGTGGGGAGCAAACAGGATTAGATACCCGCGTAGTCC

>Otu25674

CCAGCCTATGGGACGCACCAGTCGAGAATTTTTCACAATGGACGAAAGTCTGATGGAGCG  
ACGCCGCGTGAGGATGAAGGTTTTCGGATTGTAAACTCCTGTCACTGCAGAACAAGGGT  
GCCAAAGCTAATAATTTTGGCATTGTGATGGTATGCGGAGAGGAAGGGACGGCTAACTCTG  
TGCCAGCAGCCGCGGTAAGACAGAGGTCCCGAGCGTTGTTTCGGATTCAATTGGGCGTAAAG  
GGTGTGTAGGAGGTCGGGTAAGTCAGGTGTGAAATCTCACTGCTTAACGGTGAGACTGCG  
CTTGATACTGCCCGGCTAGAGGATCGGAGGGGGTAACGGAATTCATGGTGTAGCAGTGAA  
ATGCGTAGATATCATGAGGAACACCGGTGGCGAAGGCGGTTACCTGGAAGATTCTTGACT  
CTGAAACACGAAAGCCAGGGGAGCAAACGGGATTAGATACCCGAGTAGTCC

>Otu25691

CAGCCTACGGGAGGCTGCAGCGGGGAATCTTGCACAATGGACGAAAGTCTGATCCAGCCA  
TGCCGCGTGAGTGATGAAGGCCTTCGGGTATATAAGCTCTTTTACCCGGGAAGATAATGA  
CTGTACCCGGGAGAATAAGCCCCGGCTAACTTCGTGCCAGCAGCCACGGTAATACGAAGGG  
GGCTAGCGTTGTTTCGGAATTACTGGGCGTAAAGCGTGCGCAGGTGGTTTCCCAAGTCAGT  
GGTGAAAGCCCGGAGCTCAACTCCGGAAC TGCCATTGAAACTGTGAAACTCGAGGACGAG  
AGAGGTGAGTGGAATTC CAGAGTAGAGGTGAAATTCGTAGATATTGGGAAGAACACCGG  
TGGCGAAGGCGGCTCACTGGCTCGTTTCTGACACTCATGCACGACAGCGTGGGGATCAAA  
CAGGATTAGAAACCCAGTAGTCC

>Otu25707

GGACTACTGGGGTATCTAATCCTGTTTCGCTCCCCACGCTTTCGCTCCTCAGCGTCAGTAT  
TGGCCCAGATCACCGCCTTCGCTACTGGTGTTCCTCCTGATATCTGCGCACTCCACCGCT

ACACCAGGAATTCCGTGATCCCCTACCAAACCTCTAGTCACATCAGTTTCGGGTGGCGGCC  
CCAGGTTGAGCCTGGGGGTTTAAACACCCGACTTGATGAACCGCCTACGAGCTCTTTACGC  
CCAATAAATCCGAATAACGCTTGCACCCTATGTATCACCGCGGCTGCTGGCACATAGTTG  
GCCGGTGCTTCTTCTACAGGTACCGTCACAATCGTTTCTGTCGAAAGAGCTTTACACCCC  
GAAGGGCTTCATCGCTCACGCGGCGTCGCTGCATCAGAGTTTCCTCCATTGTGCAAGATT  
CCCCACTGCTGCCCCCATAGGCTGG

>Otu25721

CCAGCCTACGGGTGTCAGCAGCGAGGAATATTGGACAATGGGGGCAACCCTGATCCAGCA  
ATGCCGCGTGTTGAAGAAGGCCTTCGGGTGTAAAGCACTTTTGTCTAGGAACGAAACGG  
TTTAGGCTAATATCCTGAGCTAATGACGGTACCTGAAGAATAAGCACCGGCTAACTACGT  
GCCAGCAGCCGCGTAATACGTAGGGTGCAAGCGTTAATCGGAATTACTGGGCGTAAAGC  
GTGCGCAGGCGGTTATGTAAGACAGATGTGAAATGCCCGGGCTTAACCTGGGAACTGCAT  
TTGTGACTGCATGGCTAGAATCTGGCAGAGGGGGGTAGAATTCCACGTGTAGCAGTGAAG  
TGCGTAGATATGTGGAGGAACACCGATGGCGAAGGCAGCCTCCTGGGCCAGTACTGACGC  
TCATGCACGAAAGCGTGGGGATCAAACAGGATTAGATACCCGAGTAGTCC

>Otu25725

CCAGCCTATGGGAGGCACCAGTCGAGAATCTTCCGCAATGGACGAAAGTCTGACGGAGCG  
ACGTTACGTGATGGATGAAGCCCTTCGGGTGTAAACATCTTTTATCTGGGAGGAAACGC  
AAGTTGACAGTACCAGATGAATAAGGGGATACTAATTCTGTGCCAGCAGTAGCGGTAATA  
CAGAATCCCCGAGCGTTACCCGGATTTATTGGGCGTAAAGGGTCTGTAGGTGGTAGAGTA  
AGTTACAAATTAACTTCATCGGCTTAACCTTTGAACTGTTTGTAACTACTGCTATACTAA  
GAGGGCGTTAGAGGCAAACGGAACCGACGGAGTAGGGGTGAAATCCGTTGATATCGTCGG  
GAACACCAAAGCGAAGGCAGTTTGCTGGGACGACCCTGACACTGAGAGACGAAAGCGTG  
GGGAGCAAAGAGGATTAGATACCCGCGTAGTCC

>Otu25737

CCAGCCTATGGGTGCTGCAGTAAGGAATATTGGACAATGGGCGAAAGCCTGATCCAGCC  
ATGCCGCGTGAAAGGATTAAGGTCCTCTGGATTGTAAACTTCTTTTATTTGGGACGAAAAA  
AGGGAATTCTTTCCCACTTGACGGTACCAGATGAATAAGCACCGGCTAACTCCGTGCCAG  
CAGCCGCGGTAATACGGAGGGTGCAAGCGTTATCCGGATTCAGTGGGTTTAAAGGGTGCG  
TAGGCGGGTAGGTAAGTCAGTGGTGAAATCCTGGAGCTCAACTCCAGAACTGCCATTGAT  
ACTATCTGTCTTGAATATTCTGGAGGTAAGCGGAATATGTCATGTAGCGGTGAAATGCTT  
AGATATGACATAGAACACCAATTGCGAAGGCAGCTTACTACGGGATTATTGACACTGAGG  
CACGAAAGCGTGGGGATCAAACAGGATTAGAGACCCGCGTAGTCC

>Otu25764

CCAGCCTATGGGTGTCAGCAGTTGGGAATCTTGGACAATGGGGGAAACCCTGATCCAGCC  
ATGCCGCGTGAGTGAAGAAGGCCTTCGGGTGTAAAGCTCTGTCTGCGCGGGACGAACATT  
CCCGGGGTAAACAGCCCCAGGAACTGACGGTACCGCGAAAGGAAGCACCGGCTAACTCTG  
TGCCAGCAGCCGCGGTAATACAGAGGGTGCAAGCGTTGCTCGGAATCATTTGGGCGTAAAG  
GGTAGGTAGGTGGTCTCATTTGTCTGGGGTGAAAGCCTCGAGCTTAACTCGAGAAGTGCC  
CCGGAACGGTGAGACTGGAGTCTTGGAGAGGGTCTGTGGAATTCCCGGTGTAGCGGTGAA  
ATGCGTAGAGATCGGGAGGAACACCAGAGGCGAAGGCGGCGACCTGGACAAGTACTGACA  
CTCAACTACGAAAGCGTGGGGAGCAAACAGGATTAGAAACCCGCGTAGTCC

>Otu25771

CCAGCCTATGGGTGCTGCAGTAGGGAATATTGCGCAATGGAGGAAACTCTGACGCAGCG  
ACGCCGCGTGGGTGATGAAGTCTTCGGATCGTAAAGCCCTGTCTGGATGGGAAGAAACAC  
GGTATGGCTAATATCCATACCGCTTGACGGTACCATTAAAGGAAGCACCGGCTAACTACG  
TGCCAGCAGCCGCGGTAATACGAAGGGGGCTAGCGTTGCTCGGAATGACTGGGCGTAAAG  
GGCGCGTAGGCGGTTTCGTACAGTCAGACGTGAAATTCCCGGGCTCAACCTGGGGGCTGCG  
TTTGATACGTGCGGGCTTGAGTTCGGAAGAGGGTCTGTGGAATTCCCAGTGTAGAGGTGAA  
ATTCGTAGATATTGGGAAGAACACCGGTGGCGAAGGCGGCGACCTGGTCCGATACTGACG  
CTGAGGCGCGAAAGCGTGGGGAGCAAACAGGATTAGAAACCCCGTAGTCC

>Otu25784

CCAGCCTATGGGAGGCACCAGTGGGGAATCTTGCAGCAATGGACGAAAGTCTGACGAAGCA  
ACACCGCGTGGAGGATGAAGGCGTTTTTCGTTGTAAACTCCTTTTCTGAGGGAATAACTTT  
GAAGGTACCTCAGGAATAAGCAACGGCTAACTACGTGCCAGCAGCCGCGGTAATACGTAG  
GTTGCAAGCGTTATCCGGAATTATTGGGCGTAAAGCGTGCGCAGGCGGTTTGTTAAGTTG  
GATGTCAAAGCCTTGAGCTCAACTCAAGTCAGGTGTTCAATACTGGCAAGCTGGAGATAG  
GCAGAGGTATGCGGAATTCTGTATGTAGGGTAATATCCGTAGATATACAGAGGAACACC

AAAAGCGAAGGCAGCATACTGGGCCTTTTCTGACGCTCATGCACGAAAGCGTGGGGAGCA  
AACGGGATTAGAGACCCTTGTAGTCC

>Otu25806

CCAGCCTATGGGTTGCAGCAGCCGAGAATATTCGACAATGGGCGAAAGCCTGATCGAGCG  
ATACCGCGTGGTGGATGAAGCGATTTCGTCGCGTAAACACCTTTTATGGAGGAGGAAGTTA  
TTGACGTTACTCCATGAATAAGGGGCTCCTAACTCTGTGCCAGCAGGAGCGGTAATACAG  
AGGCCCCGAGCGTTACCCGGAATTACTGGGCGTAAAGAGTGCGTAGGTGGTCGTGTTAGC  
CGTCTGTCAAAACCCTGGGCTCAACCCAGGATCCGCAGACGAAACGGCACGACTCGAGAG  
CGTGAGAGGTACATGGAACCTCATGGTGTAGGGGTGAAATCCGTTGATATCATGGGGAACA  
CCGAAAGCGAAGGCAATGTACTGGCGCGTTTCTGACACTCGAGCACGAAAGCCAGGGGAG  
CAAACGGGATTAGATACCCCTGTAGTAC

>Otu25819

CAGCCTATGGGGGGCTGCAGTCGAGAATTTTTCTCAATGGGCGAAAGCCTGAAGGAGCGA  
CGCCGCGTGGGGGATGAAGGCCTTCGGGTCGTAAAGCTCTGTTGTACGGGGCGAATGCGG  
ATATGGCTAATATCCATATCCAGTGACAGTACCGTATAAGAAAGGACCGGCTAACTTCGT  
GCCAGCAGCCGCGGTAAGACGGGGGGTCCAAGCGTTGTTTCGGAATCATTGGGCGTAAAGC  
GTGTGCAGGTGGTTTTGTAAAGTTGGATGTGAAAGCCCCGGGCTTAACTCGGGAAGTGCAT  
TCAAACTGCAAACTTGAGTATGGAAGAGGGTCGTGGAATTCAGGTGTAGTGGTGAAA  
TACGTAGATATCTGGAGGAACACCGGTGGCGAAGGCGGCGACCTGGTCCTATACTGACAC  
TCATACACGAAAGCGTGGGGATCAAACAGGATTAGAAACCCTTGTAGTCC

>Otu25821

CCAGCCTACGGGGCGCTGCAGTCGAGAATCTTCCGCAATGGACGAAAGCCTGACGGAGCG  
ACGCCGCGTGATTGATGAAGACCCTATCGGTCGTAAAGATCTTTTATGAGGGAAGAAGTT  
TATTGACGGTACCTCATGAATAGGAGGCTCCTAATCTCGTGCCAGCAGGAGCGGTAATAC  
GAGAGCCTCGAGCGTTATCCGGAATTATTGGGCGTAAAGGGTGAGTAGGCGGCGCTGTTA  
GTTCGAGTGTAAATCTCCGAGCTTAACTTGGAATTCGCATTCGAAACGGCAGTGCTTGAG  
AGAAGAAGGGGTGCATAGAACTCATGGTGTAGGGGTGAAATCCGTTGATATCATGGGGAA  
TACCAAAAGCGAAGGCAGTGCACCTGGTCTTTATCTGACGCTGAATCACGAAAGCGTGGGG  
AGCAAACAGGATTAGAAACCCCCGTAGTCC

>Otu25824

CCAGCCTACGGGTCGCACCAGTCGAGAATTTTTCTCAATGGGGGAAACCCTGGAGGAGCG  
ACGCCGCGTGAGGATGAAGGTCTTCGGATCGTAAACTTCTGTTCATTAGAGAACAATGCG  
CAGGGTAATAACTGACCCTGCGTTGATAGTACCTGAAGAGGAAGAGACGGCTAACTCTGT  
GCCAGCAGCCGCGGTAATACAGAGGTCTCAAGCGTTGTTTCGGATTTCATTGGGCGTAAAGG  
GTGCGTAGGTGGCGAAGTAAGTCGGGCGTGAAATCTCGGGGCTTAAACCCGAAACTGCAT  
TCGATACTGCCTTGCTCGAGGACTGGAGAGGAGATCGGAATTCATGGTGTAGCAGTGAAA  
TGCGTAGATATCATGAGGAAGACCAGTGGCGTAGGCGGATCTCTGGACAGTTCCTGACAC  
TGAGGCACGAAGGCCAGGGGAGCAAACGGGATTAGATACCCTAGTAGTCC

>Otu25847

CCAGCCTACGGGTCGCAGCAGAATCGGGATCAACTCTTCATCGATGGCATTGGGCAACAC  
CGTACTGCGCAGTGCGACCACGAAATAGTCTTTTTTTCGTCCGATCTGCTGCGCCACGCT  
CTCAAATACATGTTTAAGATAGTCCAGACGGATCGTTCCATTAGTGTTGGTCGGGGTTCC  
AACGCAAATAAGGGCAATACCTGTGTTCTCCACAGCATCGTCATGATTGACGGTAGCCCCG  
CAGTCGCCCCGCGGAGACCATCTCTTTAATTAACTCGCCCAGACCAGGCTCGAAAAATGG  
AGAGCGCCCTTCATTTCAGAGCGGCGACCTTGAAAGGGTCCACATCCACACCAATTACGTC  
GTGTCCCTCATGAGCAAGACATGCTGCCGTCACGCACCCAACATATCCGACTCCAAACAC  
ACTCACTCTCATTAGAAACCCTAGTAGTCC

>Otu25886

CCAGCCTATGGGTTGCAGCAGTGGGGGATTTTTCGCAATGGGGGAAACCCTGACGCAGCA  
ACGCCGCGTGGAGGATGAAGTACTTCGGTACGTAAACTCCTTTTCGATCGGGACGATAATG  
ACGGTACCCGCGAGAAGAAGCCCCGGCTAACTTCGTGCCAGCAGCCGCGGTAATACGAAGG  
GGGCTAGCGTTGCTCGGAATCACTGGGCGTAAAGCGCACGTAGGCGGATCGTTAAGTCAG  
GGGTGAAATCCTGGAGCTCAACTCCAGAACTGCCTTTGATACTGGCGACCTTGAGTTCGG  
GAGAGGTGAGTGGAACCTGCGAGTGTAGAGGTGAAATTCGTAGATATTCGCAAGAACACCA  
GTGGCGAAGGCGGCTCACTGGCCCCGATACTGACGCTGAGGTGCGAAAGCGTGGGGAGCAA  
ACAGGATTAGAGACCCGCGTAGTCC

>Otu25902

CCAGCCTATGGGACGCACCAGTGGGGAATCTTGACAATGGGGGAAACCCTGATGCAGCG

ACGCCGCGTGGGGGAAGAAGGCTTTCGGGTTGTAAACCCCTTTCAGTTGGGACGAAGCTC  
CGTCGGTTAATAGCCGCCTGGAGTGACGGTACCTTCACAAGAAGCACCGGCTAACTACGT  
GCCAGCAGCCGCGGTAATACGTAGGGTGCAAGCGTTGTCCGGAATCATTGGGCGTAAAGA  
GCGTGTAGGCGGCCTGATCAGTCCGCTGTAAAAGTCCAGGGCTCAACCCCTGGAAGGCCGG  
TGGATACTGTCAGGCTAGAGTCCGGAAGAGGCGAGTGGAATTCCTGGTGTAGCGGTGAAA  
TGCGCAGATATCAGGAGGAACACCAATGGCGAAGGCAGCTCGCTGGGACGGTACTGACGC  
TGAGACGCGAAAGCGTGGGGAGCAAACAGGATTAGAGACCCCGTAGTCC

>Otu25919

CCAGCCTATGGGGGGCACCAGTCGGGGAACTTTCCTCAATGCGCGCAAGCGTGAGGAAGCG  
AGCCAGAGTGATGCAGATATAATTTTTGCATCTTTTGTATTATTGTAAAAAGATAGACGAA  
TAAGGGGTGGGCAAGATCGGTGCCAGCCGCCGCGTAATCCCGACGCCCCAAGTCGCAGC  
CACAATTATTGGGTCTAAAACATTTCGTAGCTTGTGTGTTAAGTTTCTTGTGAAATCTTAG  
ATCTTAAATTTAAGGCGTGCAAGGAATACTGGCAAACCTTGAGACCGGAAGAAGCAAGAAG  
TATGCTCGAGGTAGTGGTAAAAATATGTTAATCTCGAGCAGACTAACAAGAGCGAAGGCAT  
CTTGCTAGTACGGATCTGACAGTGAGGAATGAAGGCTAGGGTCGCGAAAGGGATTAGAAA  
CCCCAGTAGTCC

>Otu25925

CCAGCCTACGGGGGGCACCAGTCGAGAATATTTCCCAATGGCCGAAAGGCTGAGGGAGCG  
ACGCCGCGTGCGGGGATGAAGGCCTTCGGGTCGTAAACCGCTTTTGCCGAGGACGAAATTA  
TGACGGTACTCGGAGAATAAGAGGTTGCTAACTCTGTGCCAGCAGCAGCGGTAATACAGA  
GACCTCAAGCGTTATCCGGATTTATTGGGCGTAAAGGGTCCGCAGGTGGCATTGCGCGTC  
ATTGGTTAAATCTTCGGGCTCAACCCGGAACCTGCCAGTGATACGGCAAAGCTAGAGGGT  
GGGAGAGGTGAGCGGAGTTGCCGGTGTAGTAGTAAAATGCGTTAATATCGGCAAGAACAC  
CAAAAGCGAAGGCAGCTCACTGGAACACTTCTGACACTCAGGGACGAAAGCGTGGGGAGC  
GAAAGGGATTAGAAACCCCTGTAGTCC

>Otu25931

CCAGCCTACGGGGGGCTCCAGTAAGGAATATTGGTCAATGGACGCAAGTCTGAACCAGCC  
ATGCCGCGTGCGAGGATGACAGCCCTACGGGTTGTAAACTGCTTTTATACGGGAAAAAAC  
TCCGGTCGTGTACCGGAGCTGATGGTACCGTAAGAATAAGCATCGGCTAACTCCGTGCCA  
GCAGCCGCGGTAATACGGAGGATGCAAGCGTTATCCGGATTCAATTGGGTTTAAAGGGAGC  
GTAGGCGGACTTATAAGTCAGTGGTGAAATCTCGTTGCTTAACAACGAACGTGCCATTGA  
TACTGTAGGTCTTGAGTACAGATGATGTTGGCGGAATGTGTCATGTAGCGGTGAAATGCT  
TAGATATGACACAGAACACCGATTGCGAAGGCAGCTGACAAAACCTGTAACCTGACGCTGAG  
GCTCGAAAGCGTGGGGATCAAACAGGATTAGAGACCCCTGTAGTCC

>Otu25935

CCAGCCTACGGGTTGCTCCAGTGGGGAATATTGGACAATGGGGGCAACCCTGATCCAGCA  
ATGCCGCGTGGGTGAAGACGGCCTGCGGGTTGTAAAGCCCTTTAGGCGGGGAGGAACGGC  
GGTACGCGAACAGCGCGCCGCTCTGACGTTACCCGCTGAAGAAGCACCGGCCAACTCCGT  
GCCAGCAGCCGCGGTAATACGGAGGGTGCGAGCGTTAATCGGAATTACTGGGCGTAAAGC  
GCGCGTAGGCGGTTTGTCAAGTCAGTTGTGAAAGCCCCGGGCTCAACCTGGGAATGGCAA  
TTGAGACTGACCGACTGGAGTGTAAGAGAGGACCGTGGAATTCCTGGTGTAGCGGTGAAA  
TGCGTAGAGATCGGGAAGAACACCGATGGCGAAGGCAGCGGTCTGGGTTAACACTGACGC  
TGAGGTGCGAAAGCGTGGGGAGCAAACAGGATTAGATACCCTTGTAGTCC

>Otu25961

CCAGCCTACGGGGGGCTCCAGTCGAGAATCTTCCACAATGGACGAAAGTCTGATGGAGCG  
ACGCCGCGTGATTGATGAAGCCCTCTGGGCGGTAAAGATCTTTTATGAGGGAAGAAGTT  
TATTGACGGTACCTCACGAATAAGAGGCTCCTAATCTCATGCCAGCAGGAGCGGTAATAC  
GAGAGCCTCGAGCGTTATCCGGAATTATTGGGCGTAAAGGGTGCGTAGGTTGTTCTGTTA  
GTCTTTTGTCAAAGCCTCGGGCTTAACCTGAGATACGCAAAAGAAACGGCAGAACTTGAA  
AGTGTGAGAGGTATATGGAACCTCATGGTGTAGGGGTGAAATCCGTTGATATCATGGGGAA  
CACCAAATGCGAAGGCAATATACTGGCGCATGTTTGACACTGAAGCACGAAAGCGTGGGT  
AGCGAATGGGATTAGAAACCCCTGTAGTCC

>Otu25972

CCAGCCTACGGGGCGCTGCAGTAAGGAATATTGGTCAATGGGCGGAAGCCTGAACCAGCC  
ATGCCGCGTGCGAGGAAGACGGCCCTACGGGTTGTAAACTGCTTTTGCAGGGGAATAAAC  
CCCATATGTATATGGGGCTGAATGTACTCTGAGAATAAGGATCGGCTAACTCCGTGCCAG  
CAGCCGCGGTAATACGGAGGATCCGAGCGTTATCCGGATTTATTGGGTTTAAAGGGTGGC  
TAGGCGGCCTTGTAAGTCAGGGGTGAAAGACGGTAGCTTAACCTATCGCAGTGCCTTTGAT

ACTGCAGGGCTTGAATGTACTTGAGGTAGGCGGAATGTGACAAGTAGCGGTGAAATGCAT  
AGATATGTACAGAACACCAATTGCGAAGGCAGCTTACTAAAGTATGATTGACACTGAGA  
CACGAAAGCCAGGGGAGCAAACGGGATTAGATACCCCCGTAGTCC

>Otu25976

CCAGCCTATGGGGCGCTCCAGTGGGGAATATTGGACAATGGGGGCAACCCTGATCCAGCC  
ATGCCGCGTGAATGATGAAGGCCTTCGGGTGTAAACTCTTTCGACGGGGACGATAATG  
ACGGTACCCGTAGAAGAAGCTCCGGCTAACTTCGTGCCAGCAGCCGCGGTAATACGAAGG  
GAGCTAGCGCTGTTTCGGAATTACTGGGCGTAAAGGGCGCGTAGGCGGTTTGACAAGTTGG  
ATGTGAAAGCCCTGGGCCCCAACCCGGGAATTGCATTCAAGACTGTCTTGCTTGAATTCGG  
TAGAGGTAAGTGGAATTCACAGTGTAGAGGTGAAATTCGTAGAGATTGGGAAGAACACCA  
GTGGCGAAGGCGGCTTACTGGACCGACATTGACGCTGAGGCGCGAAAGCGTGGGGAGCAA  
ACAGGATTAGAAACCCTAGTAGTCC

>Otu25985

CCAGCCTATGGGGGGCAGCAGTCGAGAATTTTTCTCAATGGGGGAAACCCTGAAGGAGCG  
ACGCCGCGTGAAGGATGAAGGTCTTCGGATTGTAAACTTCTGTCATTAGAGAACAAGTGC  
CATCGAGTAACTACCGGTGGCTTGATAGTATCTGAAGAGGAAGAGACGGCTAACTCTGTG  
CCAGCAGCCGCGGTAATACAGAGGTCTCAAGCGTTGTTTCGGATTCACTGGGCGTAAAGGG  
TGCGTAGGCGGCCGGGTAAGTCTGACGTGAAATCTCCGGGCCTAACCCGAAACTGCGTC  
GGATACTATCCGGCTAGAGGATTGGAAGGGAGACTGGAATACTTGGTGTAGCAGTGAATG  
CGTAGATATCAAGTGGAACACCAAGTGGCGAAGGCGAGTCTCTGGACAATTCCTGACGCTG  
AGGCACGAAAGCCAGGGGAGCAAACGGGATTAGAAACCCTCGTAGTCC

>Otu25988

CCAGCCTATGGGTTGCACCAGTTGGGAATATTGCGCAATGGGCGAAAGCCTGACGCAGCA  
ACGCCGCGTGAGCGATGAAGGTCTTCGGATCGTAAAGCTCTTTCGGCCGGGACGAAAACC  
CGTCTGTTTCATACCAGACGGTTTGACTGTACCGGAAGAAGAAGCACCGGCTAACTCTGTG  
CCAGCAGCCGCGGTAATACAGAGGGTGCAAGCGTTGTTTCGGAATTATTGGGCGTAAAGCG  
CGTGTAGGCGGCCTGTTATGTGCGGTGTGAAAGCCCTCAGCTTAACTGAGGAAGTGCGCC  
CGAAACTGGCAGGCTTGAGTACCGGAGAGGAGAGCGGAACACCCGGTGTAGAGGTAAAT  
TCGTAGATATTTCGCAAGAACACCAAGTGGCGAAGGCGGCTCACTGGCCCCGGAAGTACGCT  
GAGACGCGAAAGCGTGGGGAGCAAACAGGATTAGATACCCTAGTAGTCC

>Otu26000

CAGCCTATGGGTGGCACCAGTGGGGAATATTGGACAATGGGCGCAAGCCTGATCCAGCAA  
TGCCGCGTGAGTGAAGAAGGCCTTAGGGTTGTAAAGCTCTTTCGGCGGGGACGATGATGA  
CGGTACCCGCGAGAAGAAGCCCCGGCTAACTCCGTGCCAGCAGCCGTGGTAATACGGAGGG  
GGCTAGCGTTGTTTCGGAATTACTGGGCGTAAAGGGCGCGTAGGCGGCGGATAAGTTGGG  
CGTGAAAGGCCCGGGCTCAACCCGGGGACTGCGCTTGATACTGTCGCGCTGTGAGTCCGG  
GAGAGGATGGCGGAATTCACAGTGTAGAGGCGAAATTCGTAGATATTGGGAAGAACACCG  
GTGGCGAAGGCGGCCATCCGGACCGGCACTGACGCTGAGGCGCGAAAGCGTGGGGAGCAA  
ACAGGATTAGAGACCCGAGTAGTCC

>Otu26006

CCAGCCTACGGGTGCGACCAGCCTGCAACACGACGTATCTTTCACCTGTGGACGCATTGC  
TGTCTTTCGTGTCGTGGACCTCAACCCGTTCCGAAAGGCGTTTCCCAGTCTATGAGATCG  
CCGAACCAGATCACTGGACCGAACGCGGCGGGCTGCGTCGGTTTTCAATTGGGGCGCAAT  
GGGCCGGCCGCATCGGTGAGTTCTGTGCTTCGGCAGACTTAACCCCATGAAGCAGTCGGG  
GATCATCCGTTTCAGTCGGTATAATCGGGATAGGTTGTATCCTTCTCCTGCTGACCTGCTG  
GCTTGGATGCTCTCGGCAAGGGGTCATTTCATGACAGAGTAACGCCCTTTCAGCTAGCAAT  
CATACAGACCGCTTTGGACGCGTTCGATATTGACTGCGAAAGATAACCAACCGCCAGCGA  
GGGCTTGGCGGCACTGATTAGAGACCCCCGTAGTCC

>Otu26012

CCAGCCTATGGGGGGCTCCAGTGGGGAATATTAGACAATGGGGGAAACCCTGATCCAGCC  
ATGCCGCGTGAATGATGAAGGCCTTAGGGTTGTAAAGTTCTTTTGTGAGGGAAGATGATG  
ACGGTACCTGAAGAATAAGCACCGGCTAACTTCGTGCCAGCAGCCGCGGTAATACGAAGG  
GTGCTAGCGTTGTTTCGGAATTACTGGGCGTAAAGCGCGCGTAGGCGGCTATTCAAGTCAG  
GGGTGAAATCCTTGGGCTCAACCCAAGAATTGCCTTTGAAACTGTATGGCTAGAGTGTGCG  
GAGGGGATAGCGGAATTGCTAATGTAGGGGTGAAATTCGTAGATATTAGCAGGAACACCG  
GTGGCGAAGGCGGCTATCTGGACGACAACCTGACGCTGAGGCGCGAAAGCACGGGGATCAA  
ACAGGATTAGAACCCGCGTAGTCC

>Otu26031

CCAGCCTACGGGTGTCACCACTGGGGAATTTTGCGCAATGGGGGAAACCCTGACGCAGCA  
ACGCCGCGTGAGGATGAAGCCCCCTTGGGGTGTAAGCTCCTTTTCGATCGGGAAGATAATG  
ACGGTACCGATAGAAGAAGCCCCGGCTAACTTCGTGCCAGCAGCCGCGGTAATACGAGGG  
GGGCAAGCGTTGTTTCGGAATTATTGGGCGTAAAGGGCGCGTAGGCGGTCTGACAAGTCTT  
GTGTGAAATCTCTGGGCTCAACCCAGAGTCTGCATAGGAACTGTCTGGGCTGGAGTATGG  
GAGAGGTGCGTGGAATTTCCGGTGTAGCGGTGAAATGCGTAGATATCGGAAGGAACACCT  
GTGGCGAAAGCGGCGCACTGGACCATAACTGACGCTGAGGCGCGAAAGCTAGGGGAGCAA  
ACAGGATTAGAGACCCGCGTAGTCC

>Otu26034

CCAGCCTACGGGAGGCTGCAGTGGGGAATATTGCGCAATGGAGGAACTCTGACGCAGCG  
ACGCCGCGTGGGTGATGAAGGCCTTCGGGTGCTAAAGCCCTGTCGGAAGAGACGAAAAAC  
GGTATGGCTAACATCCATACCGTCTGACGGTATCTTCAAAGGAAGCACCGGCTAACTACG  
TGCCAGCAGCCGCGGTAATACGTAGGGTGTAGCGTTGTTCGGAATCATTGGGCGTAAAG  
CGCGTGTAGGTGGTTAGTTAAGTCGGGTGTGAAAGCCCTGGGCTCAACCGAGGAAGTGCA  
TCCGAACTAACTAGCTCGAGGACGGTAGAGGAAGGTGGAATTCCTAGTGTAGAGGTGAA  
ATTCGTAGATATTAGGAGGAATACCGGTGGCGAAGGCGGCCTTCTGGGCCGTTCTCTGACA  
CTGAGACGCGAAAGCGTGGGTAGCAAACAGGATTAGATACCCTCGTAGTCC

>Otu26058

CCAGCCTATGGGACGCTGCAGGCGTGATTGATGCGCAGGATTCGGAATGGCCCTCGGCCA  
CCCCGGACGAGGGCGTCCGGGGCTCCACGAAATCTTTTGGCTCCGCAAACTCTACGATG  
AGCCTTCTGAGTCGGATCGGTATCAGATGATTCGGACTTACTTCTCGATGTTGATTGAGG  
AGGAGTTGCCGATGCTGTGGGGAAGATGAAGCAGTTTGCTTCGTGGTTCACGCACGGGG  
TGCCGGGGGGAGCGGGGCTACGGAAGGCGATTTATGAGTCGAAGAATGCGGTGGAGATTC  
TGAGGCGGGTGGAAGAATTCTTCGAGGCAAGGTTGCAGCTGTGTGGCGGGGCACCGACG  
CCCGCGAAACTGACCGCTACATAGTGGTTCCTCATTTCGAACGACTTCGCCTTCGACGC  
TATAATGCCCTTGTTAAGGCGTCAGCGCGATGATTGACATTAGAGACCCAGTAGTCC

>Otu26079

CCAGCCTACGGGGTGCTCCAGTAGGGAATCTTCCGCAATGGACGAAAGTCTGACGGAGCA  
ACGCCGCGTGAGTGATGAAGGTTCTCGGATCGTAAAGCTCTGTTGCCAGGGAAGAACAGC  
GAGGAGAGTAACTGCTCCTCGTGTGACGGTACCTGAGAAGAAAGCCCCGGCTAACTACGT  
GCCAGCAGCCGCGGTAATACGTAGGGGGCAGGTGTTGTCCGGAATTATTGGGCGTAAAGC  
GCGCGCAGGCGGCCTTGTAAGTCTAGTGTTAATCTCGGAGCTCAACTCCGATTTCGCACT  
GGAACTGCAAAGCTTGAGTACAGAAGAGGAAAGTGAATTCACGTGTAGCGGTGAAAT  
GCGTAGAGATGTGGAGGAACACCAGTGGCGAAGGCGACTTCTTGGGCTGTAAGTACGCT  
GAGGCGCGAAAGCGTGGGGAGCAAACAGGATTAGAAACCCAGTAGTCC

>Otu26081

CCAGCCTATGGGTCGCGAGCAGTGGGGAATATTGGACAATGGGGGAAACCCTGATCCAGCA  
ATGCCGCGTGAGTGATGAAGGCCTTAGGGTTGTAAAGCTCTTTCGGCGGGGACGATGATG  
ACGGTACCCGCGAGAAGAAGCCCCGGCTAACTTCGTGCCAGCAGCCGCGGTAATACGAAGG  
GGGCTAGCGTTGTTTCGGAATTACTGGGCGTAAAGCGCACGCAGGCGGCTCGCTAAATTAG  
AAGTGAAAGCCCTGGGCTCAACCCGGAATTGCTTTTAAGACTGACGAGCTAGAATCCAG  
AAGAGGGTAGCGGAATTCACAGTGTAGAGGTGAAATTCGTAGATATTGGGAAGAACACCA  
GTGGCGAAGGCGACTACCTGGTCTGGCATTGACGCTCAGGCGCGACAGCGTGGGGATCAA  
ACAGGATTAGAGACCCAGTAGTCC

>Otu26086

CCAGCCTACGGGGCGCTCCAGCGGGGAATATTGCGCAATGGACGAAAGTCTGACGCAGCG  
ACGCCGCGTGAGGGATGAAGGTCTTAGGATTGTAAACTTCTGTTAAGTGGAAGAAATAC  
CGGGTAACCGGGGATGACGGTACCACTAAAGAAAGCACCGGCTAATCTCGTGCCAGCAGC  
CGCGGTAATACGAGAGGTGCAAACGTTATTCGGAATCACTGGGCGTAAAGGGTGCGTAGA  
CGGTATGTTAAGCTCATTGTTAATACCTCGGCCTAACCGAGGAAATGCGAAGGGTACTG  
GCATACTAGAGGGTCAAAGAGAGAAGTGAATTCCTCGGAGTAGCAGTGAAATGCGTAGAT  
CTCGGGAGGAACACCGATGGCGAAGGCAGCTTCTTGGTTGACATCTGACGTTGAGGCACG  
AAAGCGCGGGGAGCAAACAGGATTAGAAACCCCTGTAGTCC

>Otu26123

CCAGCCTATGGGGCGCTGCAGTGTGGAATAGTGGGCAATGAACTTAATCGTTTGACCCCG  
CAATATTCAATTGAGTGATGAAGGTGTAAACTGTAAACTCTGCCCTAATTAATTATTATG  
AAAGTCTTTTAGGGCGAGCACCGGCTAATTCTCGTGCCAGCCGCCGCGGTAATACGGGTG  
GTGCAAGTGTTACTCCTCTTGACTAGGTGTAAAGGGTGCGTAGACAGAAAAGAAGTTTTT



AATTTAACATAAAAATGGATTTTTTAACTTCTTATTTCTAGAGTTTTTGAGACGATAATGGA  
ACTTCCTGCATTAGGGTTAAAAATCCGTTTAACTGGAGGGAACACCAAGGCGAAAAGCAA  
TTATCGATTAAAAACTGACGTTGAGGCACGAAAGGATGGGGATCAAATGGGATTAGAAAC  
CCCAGTAGTCC

>Otu26128

CCAGCCTACGGGTGGCAGCAGTGGGGAATATTGGACAATGGGCGAAAGCCTGATCCAGCA  
ACACCGCGTGTGTGAAGAAGGCCTGCGGGTTGTAAAGCACTTTTAGTGGGGAAGAGATGT  
TCAGGGTTAATAACCCCTGGATCTTGACGTAACCCAAAGAAAAAGCACCGGCTAACTCTGT  
GCCAGCAGCCGCGGTAATACAGAGGGTGCAAGCGTTAATCGGAATTACTGGGCGTAAAGC  
GTGTGTAGACGGTTATGTAAGTCGGGTGTGAAAGCCCCGGGCTCAACCTGGGAATTGCAT  
TCGAGACTGGATAGCTAGGGTACGGAAGAGGGAAGCGGAATTTAGGTGTAGCGGTGAAA  
TGCGTAGATATCTGAAGGAACACCAGTGGCGAAAGCGGCTTCCTGGTCCAGTACCGACGT  
TCAGGCACGAAAGCGTGGGGAGCAAACAGGATTAGAGACCCCCGTAGTCC

>Otu26131

CCAGCCTACGGGAGGCACCAGTGGGGAATCTTGCGCAATGGGCGAAAGCCTGACGCAGCC  
ATGCCGCGTGAATGATGAAGGTCTTAGGGTTGTAAAGCTCTTTCGGCGGGGACGATGATG  
ACGGTACCCGCGAGAAGAAGCCCCGGCTAACTTCGTGCCAGCAGCCGCGGTAATACGAAGG  
GGGCTAGCGTTGCTCGGAATGACTGGGCGTAAAGCGCGCGCAGGCGGTCTTCCAAGTCAG  
TGGTGAAAGCCCGGAGCTCAACTCCGGAAGTCCATTGAACTGTGAGACTTGAGTACGA  
GAGAGGTGAGTGGAATTCACAGTGTAGAGGTGAAATTCGTAGATATTGGGAAGAACACCG  
GTGGCGAAGGCGGCTCACTGGCTCGTAACCTGACGCTCAGGCGCGACAGCGTGGGGATCAA  
ACAGGATTAGATACCCCTCGTAGTCC

>Otu26155

CCAGCCTACGGGTGGCACCAGTCGAGAATTTTTCACAATGGGGGAAACCCTGATGGAGCG  
ACGCCGCGTGGGGGATGACTGGCTTCGGCCCGTAAACCCCTGTCATTTGCGAACAAACCT  
TTCCACTTAACACGTGGAGAGTTGATAGTAGTGGAAGAGGAAGGGACGGCTAACTCTGTG  
CCAGCAGCCGCGGTAATACAGAGGTCTCAAGCGTTGTTTCGGATTTCATTGGGCGTAAAGGG  
TGCGTAGGTGGCGCCGTAAGTCAGGTGTGAAATCTCGGGGCTCAACCCCGAAACTGCATT  
TGATACTGCGGTGCTCGAGTACTGGAGAGGAGATTGGAATTTACGGTGTAGCAGTGAAAT  
GCGTAGATATCGTAAGGAAGACCAGTGGCGAAGGCGAATCTCTGGACAGTTACTGACACT  
GAGGCACGAAGGCCAGGGGAGCAAACGGGATTAGATACCCCTCGTAGTCC

>Otu26169

CCAGCCTATGGGAGGCTGCAGTAGGGAATTTTCCACAATGGGCGAAAGCCTGATGGAGCA  
ACGCCGCGTGCAGGATGAAGGCCCTCGGGTCGTAAACTGCTTTTATCTGTGAAGATTATG  
ACGGTAGCAGATGAATAAGGATCGGCTAACTCCGTGCCAGCAGCCGCGGTCATACGGAGG  
ATCCAAGCGTTATCCGGAATTACTGGGCGTAAAGAGTTGCGTAGGTGGCAGAGTAAGTTA  
GTAGTGAAAGCGTGTGGCTCAACCACATAAACATTACTAAAAGTCTCAGCTAGAGGACG  
AGAGAGGTAGATGGAATTCACAGTGTAGGAGTGAATCCGTAGATATTGGGAGGAACACC  
GATGGCGTAGGCAGTCTACTGGCTCGTTCTTGACACTAAGGCACGAAAGCGTGGGTAGCA  
AACGGGATTAGAAACCCTCGTAGTCC

>Otu26212

CCAGCCTACGGGGGACACCAGTGGGGAATTTTGCGCAATGGGGGAAACCCTGATCCAGCCA  
TGCCGCGTGAGTGATGAAGGCCTTAGGGTTGTAAAGCTCTTTTACCCGGGAAGATAATGA  
CTGTACCGGGAGAATAAGCTCCGGCTAACTTCGTGCCAGCAGCCGCGGTAATACGAAGGG  
GGCTAGCGTTGTTTCGGAATCACTGGGCGTAAAGCGTACGCAGGCGGATTGATAAGTCAGG  
GGTGAAATCCCGGGGCTCAACCTCGGAATTGCCTTTGATACTGTCTATCTTGAGTTTCGAG  
AGAGGTTGGCGGAATTCCTAGTGTAGAGGTGAAATTCGTAGATATTAGGAAGAACACCAG  
TGGCGAAGGCGGCCAACTGGCTCGATACTGACGCTCATGTACGAAAGCGTGGGGAGCAAA  
CAGGATTAGATACCCAGTAGTCC

>Otu26240

CCAGCCTATGGGACGCTCCAGGCGCGAAAACTTTACAATGCGGGAAACCGTGATAAGGGG  
ACACCGAGTGCCAGCATCCTATGCTGGCTGTCCGGGTGTGTAAAATACACCTGTTAGCAA  
GGGCCGGGCAAGACCGGTGCCAGCCGCCGCGGTAACACCGGCGGCCCGAGTGGTGATCGT  
GATTATTGGGTCTAAAGGGTCTGTAGCCGGCTGACTAAGTCTCTTGGGAAATCTGGCAGC  
TTAACTGTGAGGCTTTTACAGGAGATACTGTTCCGGCTCGAGACCGGGAGAGGTGAGAGGTAC  
CTCAGGGGTAGGGGTGAAATCTTGTAATCCTTGAGGGACCACCAGTGGCGAAGGCGTCTC  
ACCAGAACGGATCTGACGGCAAGGGACGAAAGCTAGGGGCACGAACCGGATTAGAAACCC  
CTGTAGTCC

>Otu26243

CCAGCCTACGGGGGGCACCAGTGAGGAATATTGGTCAATGGGCGGGAGCCTGAACCAGCC  
ATCCCGCGTGCAGGAAGACGGCCCTATGGGTGTAAACTGCTTTTTTCGCATGAAGAACAT  
CCCATACGTGTATGGGACTGACGGTAATGCGTGAATAAGCACCGGCTAACTCCGTGCCAG  
CAGCCGCGGTAATACGGAGGGTGCAAGCGTTATCCGGATTTATTGGGTTTAAAGGGTGCG  
TAGGCGGCTTTTTAAGTCAGTGGTGAAATCCTGCAGCTCAACTGTAGAACAGCCATTGAA  
ACTGAGAAGCTTGAGTGATCTTGAGGTAGGCGGAATGTGTAGTGTAGCGGTGAAATGCTT  
AGATATTACACAGAACACCGATTGCGAAGGCAGCTTACTAAGGATTTACTGACGCTGATG  
CACGAAAGCGTGGGGATCAAACAGGATTAGAAACCCCAGTAGTCC

>Otu26254

CCAGCCTACGGGATGCTGCAGTCGAGAATCTTCCACAATGGACAAAAGTCTGATGGAGCG  
ACGCCGCGTGTATGAAGAAGTCCTTCGGGATGTAAAGTACTTTTCTAGAGGAGCAATTTT  
TGAGTGTACTCTAGGAATAAGGGGTTGCTAAACTCGTGCCAGCAGCAGCGGTAATACGAG  
TACCCCAAGCGTTGTCCGGAATTACTGGGCGTAAAGCGTCTGTAGGGCGTTTGATACGTC  
TTCTGTTAAATTTTCGATGCTCAACATCGAAACTGCAGGGGAAACGGTCAGACTAGAGAGT  
GTGAGAGGCCAATAGAACTTAAGGAGTAGGGGTGAAATCCGTTGATACCTTAGGGAATAC  
CAAAGGCGAAGGCATTTGGCTGGTGCATTTCTGACCCTGAGAGACGAAAGCGTGGGGAGC  
AAAAAGGATTAGAAACCCCTTGTAGTCC

>Otu26259

CCAGCCTATGGGACGCTGCAGTAGGGAATATTGGGCAATGGGGGAAACCCCTGACGGAGCG  
ACGCCGCGTGAAGGAAGAAGGTCTTCGGATTGTAAACTTCTTTTGTACGGGAAGAATAAG  
GAGCGAGGAAATGCGTCTCCGATGACGGTACCTGATGAATAAGCCCCGGCTAATTACGTG  
CCAGCAGCCGCGGTAATACGTAAGGGGCGAGCGTTACTCGGAATTACTGGGCGTAAAGGG  
CGTGTAGGCGGTCTAATAAGTCAATGTAAAATACTAAGGCTCAACCTTGGGACTGCGTT  
CGAAACTGTTAGACTTGAGTCTGGTGGAGGGCAATGGAATTCCTGGTGTAGCGGTGAAAT  
GCGTAGATATCGGGAAGAACACCGAAGGCGAAAGCAGTTGTCTATGCCAAGACTGACGCT  
GAGGCGCGAAAGCGTGGGGATCAAACAGGATTAGAAACCCCCGTAGTCC

>Otu26271

CCAGCCTACGGGATGCAGCAGTAGGGAATATTGGGCAATGGACGCAAGTCTGACCCAGCC  
ATGCCGCGTGCAGGAAGACAGCCCTATGGGTGTAAACTGCTTTTATACGGGAAAAAACT  
CCCCGACTTGTCGGGGACTGATGGGACCGTAAGAATAAGGATCGGCTAACTCCGTGCCAG  
CAGCCGCGGTAATACGGAGGATCCAAGCGTTATCCGGATTTATTGGGTTTAAAGGGTGCG  
TAGGCGGAATGATAAGTCAGTGGTGAAATCTACGGCTCAACTGTAGGACTGCCATTGAT  
ACTGTTGTTCTTGAGTATATTTGAAGTGGGCGGAATGTGTGCATGTAGCGGTGAAATGCTT  
AGAGATGACACAGAACACCAATTGCGTAGGCAGCTCACTAACTATAACTGACGCTCAGG  
CACGAAAGCGTGGGGATCAAACAGGATTAGATACCCTCGTAGTCC

>Otu26275

CCAGCCTATGGGGGTGCTCCAGTAACGAGTATTCCCCAATGCCCGCAAGGGTGAGGGAGC  
GACGCCGCGTGGAGGATGAAGCCCTTCGGGGTGTAAACTCCTGTACGGGTTTAGGAACTC  
ATGACCAAACCCAGAGGAAGAGGCGACTAACTCTGTGCCAGCAGTCGCGGTAATACAGAG  
GCCTCGAGCGTTAATCGGAATCACTGGGCTTAAAGGGTGCGTAGGCGGCGCTGCAAGTGC  
CTTGTTGAAATCCCATGGCTCAACCATGGAAGTCTTGGTAGACTGCGGCGCTTGAGGTCG  
GTAGGGGTGCGCTGGAAGTCTAGGTGGAGCGGTGAAATGCGTAGATATCTAGAGGAACGCC  
AAAGGTGAAGACAGGCGACTGGGCCGATTCTGACGCTGAGGCACGAAAGCGTGGGGAGCA  
AACGGGATTAGATACCCTTGTAGTCC

>Otu26282

CCAGCCTACGGGGCGCAGCAGTGGGGAATTTTTCGCAATGGGGGAAACCCCTGACGCAGCA  
ACGCCGCGTGGAGGATGAAGTACTTCGGTACGTAAACTCCTTTTCGATCGGGACGATAATG  
ACGGTACCGCTAAAGGAAGCACCGGCTAACTCCGTGCCAGCAGCCGCGGTAATACGGGGG  
GTGCTAGCGTTGTTCCGAATCATTGGGCGTAAAGAGCGTGTAGGCGGCTGGATAAGTCAG  
ATGTGAAAGCCCTGGGCTTAACCCAGGAAGTGCATTTGAAACTATTTCAGCTGGAGTAAGG  
GAGAGGAAAGTGGAATTCCTGGTGTAGAGGTGAAATTCGTAGATATCAGGAGGAACACCG  
GTGGCGAAGGCGACTTTCTGGCCCTATACTGACGCTGAGACGCGAGAGCGTGGGTAGCAA  
ACAGGATTAGAAACCCGCGTAGTCC

>Otu26288

CCAGCCTATGGGTGGCAGCAGTCGAGGATCTTCGGCAATGGGCGCAAGCCTGACCGAGCG  
ACGCCGCGTGCGGGATGAAGGCCCTTCGGGTGTAAACCGCTGTCAAAGGGGAGGAAATGC  
CGGGGGGTACTCCCTTCGGTTTGACCTATCCTCAGAGGAAGTACGGGCTAAGTTTCGTGCC

AGCAGCCGCGGTAAGACGAACCGTACAAACGTTATTCGGAATCACTGGGCTTAAAGGGTG  
CGTAGGCGGCCCCGGAAGTTGGGTGTGAAATCCCTTGGCTCAACCAAGGAAGTGCGCCCA  
AAACTGCCGGGCTTGAGGGAGATAGAGGTGAGCGGAAGTTAGGGTGGAGTGGTGAAATGC  
GTTGATATCCTAAGGAACACCAAGTGGCGAAAGCGGCTCACTGGGTCTCTTCTGACGCTGA  
GGCACGAAAGCTAGGGGAGCAAACGGGATTAGATACCCCTGTAGTCC

>Otu26292

CCAGCCTATGGGGGGCTGCAGTGGGGAATTTTACGCAATGGGGGAAACCCCTGACGTAGCG  
ACACCGCGTGAGCGAAGAAGCCCTTTGGGGTGTAAGCTCTGTCAGCAGGGACGAGAAAG  
GACGGTACCTGCAGAGGAAGCATCGGCTAACTACGTGCCAGCAGCCGCGGTAAGACGTAG  
GATGCGAGCGTTGTCCGGATTTATTGGGCGTAAAGAGTTCGTAGGTGGTTCGTTAAGTCT  
GGTGTAATAACCGGGGCTCAACCTCGGGGTGGCACTGGATACTGGCGGACTGGAGTGCA  
GTAGAGGCAAGCGGAATTCCCAGTGTAGCGGTGAAATGCGTAGATATTGGGAAGAACACC  
GGTGGCGTAAGCGGCTTGCTGGGCTGTAACCTGACGCTGAGGAACGAAAGCGTGGGGAGCG  
AACAGGATTAGATACCCTAGTAGTCC

>Otu26295

CCAGCCTATGGGGGGCTGCAGTGAGGAATATTGCGCAATGCCCCGAAAGGGTGACGCAGCG  
ACGCCGCGTGAGGATGAAGGCCCTCTGGGTGTAAACTCCTGTTGGAGGGGATGAATAT  
CCCATTTTTTTGGGATTGACCGTACCCTTCGAGTAAGCCACGGCTAACTACGTGCCAGCAG  
CCGCGGTAATACGTAGGTGGCGAGCGTTGTCCGGAATCACTGGGTGTAAAGGGCGCGCAG  
GCGGGTTGGTAAGTCAATGGTGAAATCGTACGGCTCAACTGTACAATTGCTTTTGATACT  
GCCGATCTTGAGTGCGGAAGAGGGTGATGGAATTCCTGGTGTAGCGGTGAAATGCGTAGA  
TATCAGGAAGAACACCGGTCGCGAAGGCGGTCACCTGGTCCGTAACCTGACGCTCAGTGCG  
CGAAAGCGTGGGTAGCAAACAGGATTAGAAACCCGTGTAGTCC

>Otu26296

CCAGCCTATGGGTGGCAGCAGTGGGGAATTTTGGACAATGGGCGCAAGCCTGATCCAGCC  
ATTCCGCGTGAGTGAAGAAGGCCCTTCGGGTGTAAAGCTCTTTCGGCAGGAACGAAACGG  
TGCAGGCTAATATCCTGTATCAATGACGGTACCTGAAGAAGAAGCACCGGCTAACTACGT  
GCCAGCAGCCGCGGTAATACGTAGGGTGCGAGCGTTAATCGGAATTACTGGGCGTAAAGC  
GTGCGCAGGCGGCTTTGTAAAGACAGGTGTGAAATCCCCGGGCTTAACCTGGGAAGTGC  
TTGTGACTGCAAGGCTTGAGTGTGGCAGAGGGGGGTGGAATTCACGTGTAGCAGTGAAA  
TGCGTAGAGATGTGGAGGAACACCGATGGCGAAGGCAGCCCCCTGGGTCAACACTGACGC  
TCATGCACGAAAGCGTGGGGAGCAAACAGGATTAGATACCCCAGTAGTCC

>Otu26307

CCAGCCTATGGGGTGCACCAGGCGCGAAAACTTTTACACTGCGCGAAAGCGCGATAAGGGG  
ACCTCGAGTGCGTGCGCAATGCGTACGCTTTTCAGATGCCTAAAAAGCATCTGGAATAAG  
GGCCGGGCAAGACCGGTGCCAGCCGCCGCGGTAACACCGGCGGCTCGAGTGGTGGCCGCT  
ATTATTGGGCTTAAAGCGTTTCGTAGCTGGTTTGTAAAGTCTCTGGGGAAATCTCCCGGCT  
TAACCGGAAGGCGTCTCAGGGATACTGGCAGACTAGGGACCGGGAGAGGTGAGGGGTACT  
CCAGGGGTAGGAGTGAAATCCTGTAATCCTTGGGGGATCACCTGTGGCGAAGGCGCCTCA  
CCAGAACGGCTCCGACAGTGAGGGACGAAAGCTGGGGGAGCAAACCGGATTAGATACCCG  
AGTAGTCC

>Otu26311

CCAGCCTATGGGTGCGCAGCAGTAGGGAATATTGGACAATGGACGCAAGTCTGATCCAGCC  
ATCCCGCGTGAAGGATTAAGGCCCTCTGGGTGTAAACTTCTTTTCTTTGGGAATAAAAA  
GCGGTATTTCATATCGCCTTGAAGGTACCAGGGGAATAAGCACCGGCTAACTCCGTGCCAG  
CAGCCGCGGTAATACGGAGGGTGCAAGCGTTATCCGGATTCACTGGGTTTAAAGGGTGCG  
TAGGTGGTCTGTAAAGTCAGCGGTGAAAGCCTGGAGCTCAACTCCAGAATTGCCATTGAT  
ACTATCAGCCTTGAGTACAGTTGAGGCAGGCGGAATGTGCAGTGTAGCGGTGAAATGCTT  
AGATATTGCACAGAACACCTATTGCGAAGGCAGCTTGCTAAGCTGTTACTGACGCTGAGT  
CACGAAAGCGTGGGGATCAAACAGGATTAGAAACCCGCGTAGTCC

>Otu26330

CCAGCCTATGGGACGCTGCAGTGAGGAATATTGCGCAATGCCCCGAAAGGGTGACGCAGCG  
ACGCCGCGTGAGGATGAAGGCCCTACGGGTCGTAAACTCCTTTTGTGAGGGAATAATTT  
CTCGCTATAGGCGAGATTGAATGTACCTCAGGAAAAAGCATCGGCTAACTACGTGCCAGC  
AGCCGCGGTAACACGTAGGAGACGAGCGTTATCCGGATTTACTGGGCGTAAAGCGCGTGC  
AGGCGGTTTTGGTAAGTTGGATGTGAAAGCTCCCGGCTTAACCTGGGAGAGGTTCGTTCAATA  
CTGCCAGACTAGAGGATGGTAGAGGGAGGTGGAATTCTGGGTGTAGTGGTGAATGCGTA  
GATATCCAGAGGAACACCAAGTGGCGAAGGCGCCTCCTGGACCATTTCTGACGCTCAGAC

GCGAAAGCTAGGGTAGCAGACGGGATTAGATACCCGAGTAGTCC

>Otu26334

CCAGCCTACGGGGGGCAGCAGCTAGGAATATTCCACAATGGGCGAAAGCCTGACGGAGCG  
ACGCCGCGTGACGATGAAGGCCTTCGGGTGTAAAGTCCTTTTCGTGCGGGAAGATTTT  
CCATGGGTAAATAATCCATGGGATTGACTGTACTGCAGGAAGAAGCCCCGGCTAATTACG  
TGCCAGCAGCCGCGGTAATACGTATGGGGCAAGCGTTATTCGGATTTATTGGGCGTAAAG  
CGCATGTAGGCGGTCTGCTAAGTCGGATGTGAAATTTCCAGGCTTAACCTGGAACCTGCA  
CCCGAACTGACGGACTTGAGTTCAGAAGAGGAGAATGGAATTCAGGTGTAGGAGTGAA  
ATCTGTAGATATCTGGAAGAACACCAGTGGCGAAGGCGATTCTCTGGTCTGATACTGACG  
CTTAGATGCGAAAGCCAGGGGAGCAAACGGGATTAGAAACCCAGTAGTCC

>Otu26337

CCAGCCTACGGGGGGCTGCAGCAGGGAATCGTACGCAATGGACGAAAGTCTGACGTCGCA  
ATGCCGCGTGAGGATGAAGGCCCTAGGGTCGTAAACTCCTTTTGCCATGTATGAGAGTA  
CATGGAGAATAAGTGATTGCTAACTCTGTGCCAGCAGCCGCGGTAATACAGAGGTCACAA  
GCGTTATCCGGATTTATTGGGCGTAAAGCGTTTCGTAGGTTGGTTGGTAAGTTGCTCTTC  
AAAGACCACGGCTCAACCGGGGGAAGGGGAGTAAGACTGCCAGTCTTGAAATATGGTGGG  
GCATCTGGAACCTGATGGTGTAGTAGTGAAATACGTTGATATCATCAGGAACTCCAAGGGC  
GAAGGCAGGATGCTAACCATTTTTTGACACTGAGGAACGACAGCTAGGGGAGCGAAAGGG  
ATTAGAGACCCCGTAGTCC

>Otu26349

CCAGCCTATGGGAGGCACCAGTAAGGGATATTGCGCAATGGGCGAAAGCCTGACCCAGCG  
ACGCCGTGTGGGCGATGAAGGCCTCGGGTCGTAAAGCACTTTTCTGAGGAATGAGAAAGG  
ACAGTACCTCAGGAATAAGTCTCGGCTAACTACGTGCCAGCAGCCGCGGTAGAACGTAGG  
AGACGAGCGTTATCCGGATTTACTGGGCGTAAAGCGTGTGCAGGCGGTTCCGGCAAGTTGG  
ATGTGAAATCTCCCGGCTCAACTGGGAGGGGTCGTTCAATACTACCGAACTTGAGGGCAT  
CAGAGGAAGGTGGAATTCCTGGTGTAGTGGTGAAATGCGTAGATATCGGGAGGAACACCA  
GTGGCGAAAGCGGCCTTCTGGGATGATCCTGACGCTCAGACACGAAAGCTAGGGGAGCAA  
ACGGGATTAGAGACCCCTCGTAGTCC

>Otu26357

CCAGCCTACGGGGGGCTGCAGGAGGGAATATTGGTAATAGGCGAAAGCCCGAACCCAGCAA  
CGCCGCGTGCGCGATGAAGGCCTTCGGGTGTAAAGCGCTTTTCGAGGGGATGAGGAAGG  
ACAGTACCCTCGGAATAAGTCTCGGCTAACTACGTGCCAGCAGCCGCGGTAACACGTAGG  
AGGCAAGCGTTATCCGGACTTACTGGGCGTAAAGCGCATGCAGGTGGTTCCGGTAAGTTGG  
ATGTGAAAGCTCCTGGCTCAACTGGGAGAGGTCGTTCAATACTACCGGACTTGAGAGCAG  
TAGAGGGAGGTGGAATTCCTGGTGTAGTGGTGAGATGCGTAGATATCGGGAGGAACACCA  
GTGGCGAAAGCGGCCTCCTGGACTGTTTCTGACACTCAGACGCGAAAGCTAGGGTAGCAA  
ACGGGATTAGAAACCCAGTAGTCC

>Otu26358

CCAGCCTACGGGTCGCTGCAGTGAGGAATATTGGGCAATGGGCGCAAGCCTGACCCAGCA  
ACGCCGCGTGAGGACGAAGGCCTTCGGGTGTAAACTTCTTTTACGGGGGAAGAGGAAG  
GACGGTACCCCGAGAATAAGTCACGGCTAACTACGTGCCAGCAGCCGCGGTAATACGTAG  
GTGACAAGCGTTATCCGGAATTACTGGGCGTAAAGCGCACGCAGGCGGCGCACTAAGTCT  
GACGTGAAATCTCTCGGCTTAACCGGGAGGGGTCGTTGGAGACTGGTGTGCTTGAGGCGA  
TGAGAGGGGTGTAGAATTCCCGGTGTAGTGGTGGAATGCGTAGATATCGGGAGGAATACC  
AGTGGCGAAAGCGGCACCTGGCATTAGCCTGACGCTCATGTGCGAAAGCGTGGGGAGCG  
AACGGGATTAGAAACCCAGTAGTCC

>Otu26361

CCAGCCTACGGGGGGCACCAGTCGAGAATATTCCACAATGGGGGAAACCTGATCCAGCC  
ATGCCGCGTGAGTGAAGAAGGCCTTCGGGTGTAAAGCTCTTTTGTCCGGGAGCAAACCT  
GCGAGTTTAATAAATTTCGAGCTGAGAGTACCGGAAGAATAAGCACCGGCTAACTACGTG  
CCAGCAGCCGCGGTAATACGTAGGGTGCAAGCGTTAATCGGAATTACTGGGCGTAAAGCG  
TGCGCAGGTGGTGTGCAAGTCTGATGTGAAATCCCCGAGCTCAACTTGGAACCTGCATT  
GGAGACTGCATGACTAGAGTACGTCAGAGGGGGGTGGAATTCGCGGTGTAGCAGTGAAAT  
GCGTAGAGATGCGGAGGAACACCGATGGCGAAGGCAGCCCCCTGGGATGCTACTGACACT  
CATGCACGAAAGCGTGGGGAGCAAACAGGATTAGAGACCCGTGTAGTCC

>Otu26380

CCAGCCTATGGGGGGCAGCAGTCGAGAATATTGACAATGGGCGAAAGCCTGATCGAGCG  
ACGTCGCGTGAGGAAGAAGTGCTTCGGTATGTAAACTCCTTTTGTAGATTAGTAAATTT

TGAACAATCTAAGAATAAGAGGTTGCTGAACTCGTGCCAGCAGCAGCGGTAATACGAGTG  
CCTCAGGCGTTATCCGGAATTATTGGGCGTAAAGGGTGTGTAGGTGGTTTTGTAGTCTC  
CTGTCAAATCTCTCGGCTTAACCGAGAACTCGCAGGGGAAACGGCAAGACTATAGAGGGT  
GCGAGGGGTCTGTGGAAGTCTAGGTGTAGCGGTGAAATGCGTTGATATCTAGGGGAACAC  
CAAAAGCGAAGGCAGCAGACTGGAGCATTCTGACACTGAAACACGAAAGCGTGGGTAGC  
GAATGGGATTAGAAACCCGAGTAGTCC

>Otu26385

CCAGCCTATGGGAGGCAGCAGTAGGGAATATTGGGCAATGGGCGAAAGCCTGACCCAGCA  
ACGCCGCGTGACGATGAAGGCTTTCGGATCGTAAAGTGCTTTTCTGAGAGATGAGAAAAG  
GACAGTATCCTCGGAATAAGTCTCGGCTAACTACGTGCCAGCAGCCGCGGTAAAACGTAG  
GAGGCGAGCGTTATCCGGATTTACTGGGCGTAAAGCGTGCGCAGGCGGTTCCGGTAAGTTG  
GATGTGAAAGCTCCTGGCTCAACTAGGAGAGGTGCTTCAATACTGCTGGACTTGAGGATG  
GTAGAGGGAGGTGGAATTCCGGGTGTAGTGGTGAAATGCGTAGATATCCGGAGGAACACC  
AGTGGCGAAAGCGGCCTCCTGGACCATTTCTGATGCTCATGCACGAAAGCTAGGGGAGCA  
AACGGGATTAGAACCCCCGTAGTCC

>Otu26400

CCAGCCTATGGGGCGCAGCAGTAGGGAATATTGGACAATGGGGGCAACCCTGATCCAGCC  
ATGCCGCGTGAAATGATGAAGGCCTTCGGGTGTAAACCGCTTTTGTGAGGGAAGAAAAGG  
TTCTGGATAATACCTGGGACTCATGACGGTACCTGAAGAATAAGCACCGGCTAACTACGT  
GCCAGCAGCCGCGGTAATACGTAGGGTGCAAGCGTTAATCGGAATTACTGGGCGTAAAGC  
GTGCGCAGGCGGTTATGCAAGACAGAGGTGAAATCCCCGGGCTCAACCTGGGAACTGCCC  
TTGTGACTGCATAGCTAGAGTACGGTAGAGGGGGATGGAATTCGCGGTGTAGCAGTGAAA  
TGCGTAGATATGCGGAGGAACACCGATGGCGAAGGCAATCCCCTGGACCTGTACTGACGC  
CCATGCACGAAAGCGTGGGGAGCAAACAGGATTAGATACCCGCGTAGTCC

>Otu26414

CCAGCCTACGGGTTGCTCCAGGCGCGAAACCTTCACAATGCACGAAAGTGTGATGGGGGG  
ACTCAGAGTGACATGCTTCGCGCATGTGCTTTTGCCAACTCGAACTGGTTGGAGAATA  
AGTGGTGGGCAAGACTGGTGCCAGCCGCCGCGGTAACCCAGCGCCACTAGTGGGAATCG  
GTATTATTGGGTCTAAAGCGTCCGTAGCAGGTCTGCTAAATTGCTTGTGAAATCGCATCG  
CTCAACGGTGCGGATTGCAGGTAGGACTGGCAGACTAGAGACTGGGAGACGTTGGAGGTA  
TTCAAAGGGGAGCGGTAAAATGCGAGAATCCTTTGAAGACCACCTGTTGCGAAGGCGTCC  
AACAATAACAGGTCTGACTGTGAGGGTCGAAAGCTAGGGGAGCGAACCAGATTAGAGACC  
CGTGTAGTCC

>Otu26427

CCAGCCTACGGGGCGCTCCAGCAAGGAATTTTGCGCAATGGGCGAAAGCCTGACGCAGCA  
ACGCCGCGTGAGGGATGAAGGCCTTCGGGTGTAAACCTCTTTTGTGAGGGACGAATAAT  
GACGGTACCTGACGAATAAGCCCCGGCTAACTACGTGCCAGCAGCCGCGGTAACACGTAG  
GGGCGAGCGTTGTTGGAATTACTGGGCGTAAAGGGCATGTAGGCGGCTCTGTAAGTCC  
GGCGTGGAAGCCCACGGCTCAACCGTGGGATTGCGCTGGAACTGCGGAGCTTGAATCAT  
GGAGAGGGAGCTAGAATTCCTGGTGTAGGGGTGAAATCTGTAGAGATCAGGAAGAATACC  
AGTGGCGAAGGCGAGCTCCTGGCCAATGATTGACGCTGAGGTGCGAAAGTGTGGGGATCA  
AACAGGATTAGAAACCCTGGTAGTCC

>Otu26445

CCAGCCTATGGGTCGCTGCAGTGAAGAATCTTGGGCAATGGAGTAACCTCTGACCCAGTG  
AGAATACATGCATGACGAAGGCGCACAGTTTCTGTAAAGTGCTTTTCGGTGATGAAGAAA  
ACGTCCGTAATCACAGTAAGAAGCGCGGGCCAACTCTGTGCCAGCAGCCGCGGTAAGACA  
GAGCGCGCGGGCGTTATTTCGTTATGATTGGGTGTAAAGGGTACGTAGGCGGCTGTTGATA  
ATTTTTGGCTTAAAACGCGGAGTGTTCTACGCGACAGCCTTTTAAAGATTTCAGCTCGAA  
TTGAAGATAGGTGCGGGCAATTTCTTGTGTAGGGGTAAAATCCTGCCATATAAGAAGGAA  
CACCAGCTGGCGGAGGCGCCTTTCTAGTTTCAATTGACGCTAAGGTACGGAAGCGTGGGG  
AGCAAACAGAATTAGATACCCCTGTGTCC

>Otu26446

CCAGCCTACGGGTTGCAGCAGTGGGGAATCTTGACAATGGGGGAAACCCTGATGCAGCG  
ACGCCGCGTGAGTGATGAAGCCCTTCGGGGTGTAAGCTCTTTTCGGCAGGGACGATAATG  
ACGGTACCTGCGGAAGAAGCTGCGGCTAACTACGTGCCAGCAGCCGCGGTAATACGTAGG  
CAGCGAGCGTTGTTTCGGAGTTACTGGGCGTAAAGAGTGCGTAGGTGGTTTTGTAAAGTTGG  
ATGTGAAAGCTCCCGGCTTAACTGGGAGAGGTGCTTCAAACTACAAGACTTGAGAGTGG  
TAGAGGAAGGTGGAATTCGGGTGTAGTGGTGAAATGCGTAGATATCCGGAGGAACACCA

GTGGCGAAAGCGGCCTTCTGGACCATTCTGACACTGATACGCGAAAGCTAAGGTAGCAA  
ACGGGATTAGAAACCCCCGTAGTCC  
>Otu26449  
CCAGCCTACGGGGTGCAGCAGCTAAGAATCTTCCGCAATGGGGGAAACCCTGACGGAGCG  
ACGCCGCGTGAGCGATGAAGCCCTTCGGGGTGTAAGCTCTTTTCGACGGGAACGATAATG  
ACGGTACCCGGAGAAGAAGCTGCGGCTAACTACGTGCCAGCAGCCGCGGTAATACGTAGG  
CAGCAAGCGTTGTTTCGGAGTTACTGGGCGTAAAGAGTGCGTAGGCGGTTTCGTAAGTTTG  
GTGTGAAATCTCCCGGCTTAACTGGGAGGGAGCGCCGAAAACCTGCGGGGCTTGAGCGTGG  
GAGAGGTAAGCGGAATTCCCGGTGTAGCGGTGAAATGCGTAGATATCGGGAGGAACACCA  
GCGGTGTAGACGGCTTACTGGACCACGGCTGACGCTGAGGCACGAAAGCGTGGGGAGCAA  
ACAGGATTAGATACCCCAGTAGTCC  
>Otu26500  
CCAGCCTACGGGGGGCAGCAGTGGGGAATATTGGACAATGGGCGCAAGCCTGATCCAGCC  
ATGCCGCGTGAGTGAAGAAGGCCTTAGGGTTGTAAAGCTCTTTTGGCGGGGACGATAATG  
ACGGTACCCGCGAGAATAAGCCCCGGCTAACTTCGTGCCAGCAGCCGCGGTAATACGAAGG  
GGGCTAGCGTTGTTTCGGAATTACTGGGCGTAAAGCGTGCGCAGGCGGTCTGACAAGTCAG  
GGGTGAAAGCCCAGAGCTCAACTCTGGAACCTGCCCTTGAACTGTTAGGCTCGAGTGCGG  
GAGAGGTGAGTGGAATTCCCACTGTAGAGGTGAAATTCGTAGATATTGGGAAGAACACCG  
GTGGCGAAGGCGGCTCACTGGCCCCGTTTCTGACGCTCATGCACGATAGCGTGGGGATCAA  
ACAGGATTAGAGACCCCTGTGTCC  
>Otu26512  
CCAGCCTACGGGTCGCTGCAGTGAGGAATATTGCGCAATGGGGGCAACCCTGACGCAGCA  
ACGCCGCGTGAGTGAGGAAGGTTTTTCGGACCGTAAAGCTCTGTTCGAGTGGGAAGAAATGC  
ACGGTGGCTAATATCCATCATGCTTGACGGTACCGCTAAAGGAAGCACCGGCTAACTCCG  
TGCCAGCAGCCGCGGTAATACGGGGGGTGCGAGCGTTGTTTCGGAATCATTTGGGCGTAGAG  
AGCGTGTAGGCGGCTGGATAAGTCAGATGTGAAAGCCCTGGGCTTAACCCAGGAAGTGCA  
TTTGAACCTGTCTGGCTAGAGTAAAGAAGAGGAAAGCGGCATTCTTGGTGTAGAGGTGAA  
ATTCGTAGATATCAGGAGGAACACCGGTGGCGAAGGCGGCTTTCTGGTCTTATACTGACG  
CTGAGACGCGAGAGCGTGGGTAGCAAACAGGATTAGAAACCCTTGTAGTCC  
>Otu26515  
CCAGCCTACGGGGGGCACCAGGCGCGAAACTTCCGCAATGCGCGAAAGCGTGACGGAGGT  
AATCTGAGTGCTTCCCGAAAGGGGAGCTTTTAGCGAGTCCGAATAACTCGTTGAATAAGT  
AGCGGGTAATTGCTGTGCCAGCCGCCGCGGTAACACAGCTGCTACAAGTGGTGTCCACGA  
ATATTGAGTCTAAAGCGTCTGTAGCCGGCTTAGCAAGTTTCTGTCAAATCTTTCGGCTC  
AACCAGAAAGGCGCGCAGGAAATACTACTAGGCTTGGGAGTGGGGGAGGCCAAAGGTACAC  
TAGGGGGAGCGGTAAAATGCTGTAATCCTTGGTGGACCACCGGTGGCGAAAGCGTTTGGC  
CAAAACACGTCCGACGGTGAGAGACGAAGGCTAGGGGAGCGAATCGGATTAGAGACCCTC  
GTAGTCC  
>Otu26546  
CCAGCCTATGGGGTGCAGCAGGCGCGAAACCTTTGCAATGCGCGCAAGCGTGACAGGGGA  
ATTCTGAGTGGTAGAGGGATATATCTCTCTATCTTTTGGCAACTGCAAATAGGTTGCAGA  
ATAAGATCTGGGTAAAGACTAGTGCCAGCCGCCATATGCTTTATCGCATAAGGCACACGGT  
ACGCGGTAATACTAGCAGATCGAGTGGTACCCACGAATATTGGGTCTAAAGAGTCCGTAG  
CTGGCCTGTAAAGTCCGCTGTGAAATCTTGGGGCTTGACCTCAAGGCGTGAGTGATGAC  
TGGCAGGCTCGAGAGCGGGGGAGGTTGGGAGTACTTATGGGGTAGTGGTAAAATACGTTG  
ATCCTATAAGGACTACCAGTGGCGAAGGCGCCCAACCAAAACGCGTCTGACAGTGAGGGA  
CGAAGGCTAGGAGAACGAATCGGATTAGAAACCCGCGTAGTCC  
>Otu26555  
CCAGCCTACGAGTTGCAGCAGTCGAGAATTTTTTCAATGGGCGCAAGCCTGATGGAGCG  
ACGCCGCGTGGGGGATGAATGGCTTCGGCCGTAACCCCTGTCATTTCGCGATCAACCGT  
TGTTATTTAAAGATGACAACCTGATAGTAGCGGAAGAGGAAGGGACGGCTAACTCTGTG  
CCAGCAGCCGCGGTAATACAGAGGTCCCAAGCGTTGTTTCGGATTCACTGGGCGTAAAGGG  
CGCGTAGGTGGCGAGGTAAGTCGGATGTGAAATCTCGGAGCCTAACTCCGAAACGGCATT  
GGAAACTGCCTTGCTCGAGGGTTGGAGGGGGGACTGGAATACTTGGTGTAGCAGTGAAAT  
GCGTAGATATCAAGTGGAACACCAGTGGCGAAGGCGAGTCCCTGGACAACCTCTGACGCT  
GAGGCACGAAAGCGTGGGGATCAAACAGGATTAGAAACCCTTGTAGTCC  
>Otu26559  
CCAGCCTACGGGAGGCAGCAGCAACGAATATTCCGCAATGGGCGCAAGCCTGACGGAGCG

ACGCCGCGTGAAGGATGAAGTCCTTCGGGATGTAACTTCAATAGTTTGTTCAGAAAAGTGA  
GGCGACCTAATACGTCGTCAATCTGATCAGCAAATGAAAGGGACGGCTAACTCCGTGCCA  
GCAGCCGCGGTAAAGACGGAGGTCCCGAGCGTTGTTTCGGAATTATTGGGCTTAAAGCGCGT  
GTAAGCGGAACGGTAAGTACCTTGTGAAATCCCCGGACTCAATCCGGGAAGTCTTGCTA  
TACTGCCGATCTTGAGGCAGGTAGGGGTCACTGGAACCTTAGGTGGAGCGGTGAAATGCG  
TAGATATCTAAGGGAACGCCTGTGGCGAAAGCGGTGACTGGGCCTGTTCTGACGCTGAG  
ACGCGAAAGCGTAGGGAGCAAACGGGATTAGAAACCCTAGTAGTCC

>Otu26567

CAGCCTATGGGGGGCAGCAGTGAGGAATATTGCGCAATGGCCGAAAGGCTGACGCAGCGA  
CGCCGCGTGGAGGATGAAGTCCGTTAGGATGTAACTCCTTTTGTAGGGGATGAATGTTC  
CGTTTCACGGAATTGACCGTACCCTGCGAATAAGGATCGGCTAACTACGTGCCAGCAGCC  
GCGGTAATACGTAGGATCCGAGCGTTGTCCGGAATTACTGGGTGTAAAGGGCGTGTAGGT  
GGGCTCTTAAGTCGGTAGTGAAATCCCGCAGCTTAACTGCGGAATTGCTTCCGATACTGG  
GGTCTTGAGTACGGCAGAGGGAGATAGAATTCATGGTGTAGCGGTGAAATGTGTAGATA  
TCATGAAGAATACCGGTAGCGAAGGCGGTCTCCTGGTCCGTTACCGACACTGAGGCGCGA  
AAGCTGGGGGAGCAAACCGGATTAGATACCCCCGTAGTCC

>Otu26624

CCAGCCTACGGGAGGCAGCAGTGGGGAATTTTGGACAATGGGGGAAACCCTGATCCAGCA  
ATGCCGCGTGTGTGAAGAAGGCCTTCGGGTGTAAAGCACTTTTGTCCGAAAGAAAACC  
TTCGCCCTAATACGGTGAGGGGATGACGGTACCGGAAGAATAAGCACCGGCTAACTACGT  
GCCAGCAGCCGCGGTAATACGTAGGGTGCAAGCGTTAATCGGAATTACTGGGCGTAAAGG  
GTGCGCAGGCGGTTCCGCAAGTCAGGCGTGAAATCCCCGGGCTTAACCTGGGAATGGCGC  
TTGAAACTACGGGACTCGAGTATGGCAGAGGGAGGTGGAATTCACGTGTAGCGGTGAAA  
TGCGTAGAGATGTGGAGGAACACCGATGGCGAAGGCAGCCTCCTGGGCCAATACTGACGC  
TCATGCACGAAAGCGTGGGGAGCAAACAGGATTAGAGACCCTAGTAGTCC

>Otu26646

CCAGCCTATGGGTCGCAGCAGTAGGGAATTTTCCACAATGGGCGAAAGCCTGATGGAGCA  
ACGCCGCGTGCAGGATGAATGCCTTAGGGTTGTAACTGCTTTTATATGCGACGATTATG  
ACGGTAACATATGAATAAGGATCGGCTAACTCCGTGCCAGCAGCCGCGGTACATACGGAGG  
ATCCAAGCGTTATCCGGAATTACTGGGCGTAAAGAGTTGCGTAGGTGGCAGAGTAAGCAA  
ATAGTGAAATCGTGTGGCTCAACCATACACACATTATTTGAACTGCTCAGCTAGAGGACG  
AGAGAGGTAGATGGAATTTCCAGTGTAGGAGTGAAATCCGTAGATATTGGGAGGAACACC  
GATGGCGTAGGCAGTCTACTGGCTCGTATCTGACACTAAGGCACGAAAGCGTGGGTAGCA  
AACGGGATTAGATACCCCGGTAGTCC

>Otu26659

CCAGCCTACGGGTCGCACCAGTCGAGAATTTTCTCAATGGGGGAAACCCTGAAGGAGCG  
ACGCCGCGTGGGGGATGAATGGCTTCGGCCCGTAAACCCTGTCAATTTGCGAACAAATTG  
ACTCACCTAACACGTGTGTCAATTGATTGTAGCGAAAGAGGAAGGGACGGCTAACTCTGTG  
CCAGCAGCCGCGGTAATACAGAGGTCCCAAGCGTTGTTTCGGATTCACTGGGCGTAAGGGG  
TGCGTAGGCTGCGGAGTAAGTCGGGTGTGAAATTTGAAGGCTCAACCTTCAACTAGCACC  
TGATACTGCTTCGCTAGAGACCTGGAGAGGAGTTTGAATTTCTCGGTGTAGCAGTGAAAT  
GCGTAGATTTTCGAGAAGAACGCTCGCTGCGAAAGCGAAACTCTGGACAGCGTCTGACGCT  
GAGGCACGAAGGCTAGGGGAGCAAACGGGATTAGATACCCCGGTAGTCC

>Otu26663

CCAGCCTATGGGTTGCACCAGCTAAGAATCTTCCGCAATGGGGGAAACCCTGACGGAGCG  
ACGCCGCGTGGATGATGAAGGCCCTAGGGTTGTAAAGCTCTTTTGTGCGGGAAGATAATG  
ACGGTACCGCAAGAATAAGCCCCGGCTAACTTCGTGCCAGCAGCCGCGGTAATACGAAGG  
GGGCTAGCGTTGCTCGGAATCACTGGGCGTAAAGGGTGCGTAGGCGGGTCTTTAAGTCAG  
AGGTGAAATCCTGGAGCTCAACTCCAGAACTGCCTTTGATACTGAGGATCTTGAGTACGG  
GAGAGGTGAGTGGAATGCGAGTGTAGAGGTGAAATTCGTAGATATTTCGAAGAACACCA  
GTGGCGAAGGCGGCTCACTGGCCCGTTACTGACGCTGAGGCACGAAAGCGTGGGGAGCAA  
ACAGGATTAGAGACCCCTGTAGTCC

>Otu26692

CCAGGCTATGGGAGGCAGCAGTGGGGAATCTTGCGCAATGGGCGAAAGCCTGACGCAGCA  
ACGCCGCGTGAAGGATGAAGGCCCTTCGGGTGCTAAACTTCTTTGGCCGGGGACGAGCAAG  
GACGGTACCCGGACAACAAGTCACGGCTAACTACGTGCCAGCAGCCGCGGTAACACGTAG  
GTGGCGAGCGTTATCCGGATTTACTGGGTGTAAAGCGTGTGCAGGCGGAAGGGTAAGTGG  
TGTATGAAATCGCCAGCTCAACTGGGCGGGGTTATGCCAGACTGCCCATCTGGAGGACG

AGAGAGGGGCGTGGAATTCGGGGTGTAGTGGTGAAATGCGTAGAGATCCGGAGGAACCCC  
AGAGGCGAAGGCGGCGCCCTGGCTCGTACCTGACGCTCAGACACGACAGCATGGGGAGCG  
AACGGGATTAGAAACCCAGTAGTCC

>Otu26700

CCAGCCTATGGGTTGCTCCAGTGGGGAATTTTGC GCAATGGGGGAAACCCTGACGCAGCA  
ACGCCGCGTGAGGATGAAGTACTTCGGTACGTAAACTCCTTTTCGATCGGGACGATAATG  
ACGGTACCGGAAGAAGAAGCCCCGGCTAACTTCGTGCCAGCAGCCGCGGTAATACAGAGG  
GTGCGAGCGTTGTTTCGGAATTATTGGGCGTAAGGGGCGCGTAGGCGGTGCGGTAAGTCAC  
CTGTGAAAACCTCTGGGCTTAACTCAGAGCCTGCAGGCGAAACTGCCGTGCTGGAGGGTGG  
GAGAGGTGCGTGGAATTCCTGGTGTAGCGGTGAAATGCGTAGATATCGGGAGGAACACCT  
GTGGCGAAAGCGGCGCACTGGACCACTACTGACGCTGATGCGCGAAAGCTAGGGGAGCAA  
ACAGGATTAGAAACCCTAGTAGTCC

>Otu26701

GGACTACTAGGGTATCTAATCCTGTTTGCTCCCCTAGCTTTTCGCGCCTCAGCGTCAGTAA  
TGGTCCAGTGCGCCGCTTTTCGCCACAGGTGTTTCTCCCGATATCTACGCATTTTACC CGCT  
ACACCGGGAATTCCACGCACCTCTCCCATACTCCAGCACGGCAGTTTTCGCTGCAGGCCC  
CGAGTTAAGCCCGGGGATTTTACAGGTGACTTACCGCACCGCCTACGCGCCCTTTACGCC  
CAATAATTCCGAACAACGCTCGCACCTCTGTATTACCGCGGCTGCTGGCACAGAGTTAG  
CCGGTGCTTCTTCCACTGGTACCGTCATAATCTTCCCAGTCGAAAGGAGTTTACACCCCA  
AGGGGCTTCATCCTCCACGCGGCGTTGCTGCGTCAGGGTTTCCCCCATGCGCAAAATTC  
CCCACTGCTGCCCCCGTAGGCTGG

>Otu26712

CCAGCCTACGGGACGCAGCAGTCGAGAATCTTCGGCAATGGGGGAAACCCTGACCGAGCG  
ACGCCGCGTGCGGGATGAAGGCCTTCGGGTGTAAACCGCTGTCGTAGGGGAGGAAATTC  
TGGTGGGTTCCTCCATCAGATTGACCTATCCTAGGAGGAAGGACGGGCTAAGTTTCGTGCC  
AGCAGCCGCGGTAAGACGGACCGTCCAAACGTTATTTCGGAATCACTGGGCTTAAAGGGTG  
CGTAGGCGGCCCCGAAAGTTGGGTGTGAAAACCTCGGCTCAACCGAGGAACTGCGCCCA  
AAACTGCCGGGCTCGAGGGAGACATAGGTGTGCGGAACCTAGGGTGGAGCGGTGAAATGC  
GTTGATATCCTAAGGAACACCAGGAGCGAAAGCGGCTTACTGGGTCTCTTCTGACGCTGA  
GGCACGAAAGCTAGGGGAGCGAACGGGATTAGATACCCCCGTAGTCC

>Otu26763

CCAGCCTATGGGATGCACCAGTCGAGGATCTTTGGCAATGAGCGCAAGCTTGACCAAGCG  
ACGCCGCGTGTCGATGAAGGCCTTCGGGTGTAAAGCACTGTCGAGGGGAACGAAGCCG  
AAAGGTTGACCGATCCCTGGAGGAGGCACGGGCTAAGTTTCGTGCCAGCAGCCGCGGTAAG  
ACGAACCGTGCGAACGTTGTTTCGGAATCACTGGGCTTAAAGGGGCGGTAGGCGGCTTGCC  
AAGTCAGGGGTGAAATACCTCAGCTTAACTGGAGAGGTGCCTTTGATACTGGCGAGCTCG  
AGGGAGGTAGGGGCATGTGGAACCTCCGGTGGAGCGGTGAAATGCGTTGATATCGGAAGG  
AACGCCGCTGGCGAAAGCGACATGCTGGACCTCTTCTGACGCTGAGGCGCGAAAGCTAGG  
GGAGCAAACAGGATTAGATACCCGAGTAGTCC

>Otu26787

CCAGCCTATGGGGTGCAGCAGACGAGAATATTCGACAATGGGCGAAAGCCTGATCGAGCG  
ACGCCGCGTGTTGATGAAGCACTTCGGTGCGTAAAAACCTTTTATGAGCGACTAAGTCT  
ATTGAAGAGCTCATGAATAAGAGGTTGCTAAACTCGTGCCAGCAGCAGCGGTAATACGAG  
TGCCTCAAGCGTTATCCGGAATTATTGGGCGTAAAGGGTGTGTAGGCGGTCTTGTTAGTC  
TCTTGTCAAATTCTTCGGCTCAACCGGGGGTGCGCAGGGGAAACGGCAAGACTAGAAGAT  
GCGAGGGGTCTCTGGAACCTCATGGTGTAGCGGTGAAATGCGTTGATATCATGGGGAACAC  
CAAAAGCGAAGGCAGGAGACTGGAGCATTCTTGACGCTGAAACACGAAAGCGTGGGTAGC  
GAATGGGATTAGAAACCCCCGTAGTCC

>Otu26805

CCAGCCTATGGGTCGCACCAGTCAGGAATATTGCGCAATGGAGGAAACTCTGACGCAGCG  
ACGCCGCGTGGGTGATGAAGGCCTTCGGGTGCTAAAGCCCTGTTCGGAGGGGAAGAAAAGC  
CTATTGGCTAATATCCAATAGGCCCTTGACGGTACCCTCAAAGGAAGCACCGGCTAACTC  
CGTGCCAGCAGCCGCGGTAAGACGGAGGGTGCAAGCGTTGTTTCGATTGACTGGGCGTAA  
AGGGCGTGTAGGCGGTTGGTCAAGTCTGGTGTGAAAGCCCGGGGCTCAGCCTCGGAGGTG  
CATCGGAAACTAGCCAGCTGGAGTGCGATAGAGGAGGGTGGAAATTCCTGGTGTAGCGGTG  
AAATGCGTAGATATCAGGAGGAACACCGGCGGCGAAGGCGGCCCTCTGGATCGTTACTGA  
CGCTGAGACGCGAAAGCGTGGGGAGCAAACAGGATTAGAAACCCAGTAGTCC

>Otu26817



CCAGCCTATGGGTTGCAGCAGTGGGGAATCTTGCGCAATGGGCGAAAGCCTGACGAGCGA  
CGCCGCGTGCGCGATGAAGGCCTTCGGGTTGTAAAGCGCGAAAGTGGGGATAAAACCGCA  
AGGTCGATTGATCCACAGTAAGGACGGGCTAAGTTCGTGCCAGCAGCCGCGGTAAGACGA  
ACTGTCCTAACGTTGTTTCGGAATCACTGGGCTTAAAGGGCGCGTAGGCGGTTCGACCAAGT  
CAGGGGTGAAATCCTGCAGCTTAACTGTAGAAGTGCCTTTGATACTGGTCGTCTGGAGGG  
GGGTAGGGGTGTGCGGAACCTCCAGTGGAGCGGTGAAATGCGTTGATATTGGAAGGAACG  
CCGAGGGCGAAAGCGGCGCACTGGACCTCTTCTGACGCTGAGGCGCGAAAGCTAGGGGAG  
CAAACGGGATTAGATACCCCCGTAGTCC

>Otu26844

CCAGCCTATGGGGCGCAGCAGGAATCTGAAAGACGAAGTGGCCAAGGAAGAACAGTGAGC  
CGAGCATGGCGGCGCGGGAGTCTGTGATGCCAGCGTTTGGGCCAGACCGGCCGCTGCGC  
CAAAGCCGTAGTTGGCGCGATCAAGATAAGCCAGGCTGTAGGTGATGAAGACGGCAGGGA  
GGAGCAGGAACCACCGCCGCGCAATTGGGTGGGGATCAGCACTTCGTTTTCTGCCTGCA  
GATCCGCCACAGGAGATTTATAACATTTTGGGGGTAGAGCAGGATTTACAAAAGTACGCG  
CGTGTCCGGACTCCGCGGCTCTGGACTCATTCGCGGAGACTCGCGTGTCTGGACTTCGCA  
CCGCAAGACGTGGTCTGGTACAAAGAGAGAAGCTGCGAGGGACACCATCGAACAAGTGAA  
GCTAGCTTCAGTATTAGAGACCCTCGTAGTCC

>Otu26853

CCAGCCTATGGGTTGCACCAGTCGAGGATCTTTAGCAATGCCCGAAAGGGTGACTATGCG  
ACGCCGCGTGTGGGATGAAGGCCTTCGGGTGTAAACCACTGTCAGGGGGGAGAAACCT  
TACGTGTAAATAGCGCGTAAGCTGACATCACCCCCAAAGGAAGCCACGGCTAACTCTGTG  
CCAGCAGCCGCGGTAAGACAGAGGTGGCAAGCGTTGTTTCGATTTATTGGGTGTAAAGGG  
CAGGTAGGTGGCCTGGCAAGTCCGGTGTGAAATCCCACGGCTCAACCGTGGAAGTGCATT  
GGAAACTGCTTGGCTTGAGTATCGGAGAGGTAAAGGGGAATTCTCGGTGTAAAGGTGAAAT  
CTGTAGATATCGAGAGGAACACCAGTGGCGAAGGCGCCTTACTGGCCGATTACTGACACT  
GAGCTGCGAAAGCAAGGGGAGCAAACAGGATTAGAAACCCCTGTAGTCC

>Otu26857

CCAGCCTATGGGATGCAGCAGTGGGGAATTTTGCGCAATGGGCGAAAGCCTGATCGAGCG  
ATACCGCGTGGTGGATGAAGCGCTTCGGCGCGTAAACATCTTTTATGAGGGAGGAAGTTA  
TTGACGTTACCTCATGAATAAGGGGCTCCTAACTCTGTGCCAGCAGGAGCGGTAATACAG  
AGGCCCCAAGCGTTACCCGGAATTACTGGGCGTAAAGAGTGCGTAGGTGGTCGTATTAGT  
CGTCTGTAAACCCCGGAGCTCAACTCCGGATCTGCAGACGAAACGGTACGACTCGAGGG  
CGTGAGAGGTCTGTGGAAGTCAAGGTGTAGGGGTGAAATCCGTTGATATCTTGGGGAAACA  
CCGAAAGCGAAGGCAGCAGACTGGCGCGTTCCTGACACTCAAGCACGAAAGCGTGGGTAG  
CGAACGGGATTAGAAACCCGCGTAGTCC

>Otu26865

CCAGCCTACGGGGGGCAGCAGTAGGGAATCTTGCGCAATGGGCGAAAGCCTGACGCAGCA  
ACGCCGCGTGAGGGACGAAGGCCTTCGGGTGTAAACTGCTTTTGTACGGAACGAAAAGT  
CTCTTTCTAATAAAGAGGGATCATGACGGTACCGTAAGAATAAGCACCGGCTAACTACGT  
GCCAGCAGCCGCGGTAATACGTAGGGTGCAAGCGTTAATCGGAATTACTGGGCGTAAAGC  
GTGCGCAGGCGGTTATGTAAGACAGTTGTGAAATCCCCGGGCTCAACCTGGGAAGTGCAT  
CTGTGACTGCATAGCTAGAGTACGGTAGAGGGGGATGGAATTCGCGGTGTAGCAGTGAAA  
TGCGTAGATATGCGGAGGAACACCGATGGCGAAGGCAATCCCCTGGACCTGTACTGACGC  
TCATGCACGAAAGCGTGGGGAGCAAACAGGATTAGATACCCTCGTAGTCC

>Otu26872

CCAGCCTATGGGTGGCAGCAGTGGGGAATATTGGGCAATGGGCGCAAGCCTGACCCAGCC  
ACGCCGCGTGAGTGATGAAGGCCTTCGGGTGCTAAAGCTCTGTGGGGAGGGACGAACAAG  
CCCGGTATCAACACCACCGGGCCCTGACGGTACCTCCTTAGCAAGCACCGGCTAACCCCTG  
TGCCAGCAGCCGCGGTAATACAGGGGGTGCAAACGTTGCTCGGAATTATTGGGCGTAAAG  
CGCACGTAGGCGGTTTCGTTATGTCAGATGTGAAAGCCCTTGGCTCAACTGAGGAAGTGCA  
TCTGAAACTGGCGAGCTAGAGTATGTAAGAGGGTTCGCGGATTTCCCGGTGTAGAGGTGAA  
ATTCGTAGATATTCGCAAGAACACCAGTGGCGAAGGCGGCTCACTGGCCCCGATACTGACG  
CTGAGGCACGAAAGCGTGGGGAGCAAACGGGATTAGATACCCTCGTAGTCC

>Otu26879

CCAGCCTACGGGTCGCTGCAGTGGGGAATCTTGCACAATGGGGGAAACCCTGATGCAGCG  
ACGCCGCGTGAGGATGAAGCCCCCTTGGGGCGTAAACTCCTTTTCGACCAAGACGATAATG  
ACGGTACTGGTGGAAGAAGCACCGGCTAACTCTGTGCCAGCAGCCGCGGTAATACAGAGG  
GTGCAAGCGTTGTTTCGGAATTATTGGGCGTAAAGGGCACGCAGGCGGTTGTGCAAGTCTG

GTGTGAAAGACCTGGGCTCAACTCAGGGAACGCGCTGGAAACTGCACGACTAGAATCTTG  
GAGGGGGAGTTGGAATTCCTAGTGTAGGGGTGAAATCTGTTGATATTAGGAAGAACACCG  
GTGGCGAAGGCGAACTCCTGGCTGTAGATTGACGCTGAGGTGCGAAAGCATAGGGAGCAA  
ACAGGATTAGAAACCCCCGTAGTCC

>Otu26892

CCAGCCTATGGGTGCAGCAGCCGAGAATATTCGACAATGGGCGAAAGCCTGATCGAGCGA  
TACCGCGTGGTGGATGAAGCGCTTCGGCGCGTAAACATCTTTTATGGGGGAGGAAGTTAT  
TGACGTTACCTCATGAATAAGGGGCTCCTAACTCTGTGCCAGCAGGAGCGGTAATACAGA  
GGCCCCAAGCGTTACCCGGAATCACTGGGCGTAAAGGATGTGTAGGCGGTCGTGTTAGTC  
TATCGTGAAAGCTTTTGGGCCCTAACCCAGAAAACGCGGTGGAAACGGCACGACTTAGAGG  
ATGCGAGAGGTATATGGAACCTCATGGTGTAGGGGTGAAATCCGTTGATATCATGGGGAAC  
ACCAAAAGCGAAGGCAATATACTGGCGCACTCCTGACGCTGAGACATGAAAGCGTGGGAA  
TCGAACGGGATTAGAAACCCTAGTAGTCC

>Otu26931

CCAGCCTATGGGACGCAGCAGTCGAGGATAATGGCCATTGCGCGCAAGCGTGAGCCTGCG  
ACCTATCAATGGTGATGAAGAAGATTTTTGTAAACCAATCAAGAGGTTCCAGGATGAAG  
AGCCTCCGTTTAGTCGTGATTAATCCTTGTGCCAGCAGTCGCGGTCATACAAGAGCGGCA  
AACGTTTTATGGTTGGATTGCGTGTAAAGGGTATGTAGGCGGCAGTGTGATTCGAGCGA  
GCAATCCTCGGGTTGACGTGACGATGTTTGCAATAACGAAAAGACCTTTCTAAAAGGACA  
TCTATCAACCTGCTTTGAGAGAATAAGAGGAAAGTGGAATGACTCGTGTACCGATGAAAT  
CGAAAGATACGAGTTGGAACCTCCAGTGGCGGAGGCGACTTTCTGGTATTCATCTGACGCT  
GAGATACGAAAGCGTGGGAGCGATCGGGATTAGAAACCCGCGTAGTCC

>Otu26933

CCAGCCTATGGGGGGCTCCAGTGGGGAATCTTGCGCAATGGGCGAAAGCCTGACGCAGCA  
ACGCCGCGTGAGGGATGAAGGCCTTCGGGTGTAAACCTCTTTCAAGCAGGGACGATTGT  
GACGGTACCTGCAGAAGAAGCTCCGGCCAACTACGTGCCAGCAGCCGCGGTAATACGTAG  
GGAGCGAGCGTTAATCGGAATTACTGGGCGTAAAGGGTGCGCAGGCGGCTATATAAGTCA  
GATGTGAAATACCTAAGCTTAACCTGGGGGGTGCAATTTGATACTGTATGGCTAGAGTTAG  
TCAGAGGGGGGTAGAATTCCTGGTGTAGCAGTGAAATGCGTAGAGATCAGGAGGAATACC  
AATGGCGTAGGCAGCCCCCTGGGACAAAACCTGACGCTCATGTACGAAAGCGTGGGAAGCA  
TACAGGATTAGATACCCGAGTAGTCC

>Otu26942

CCAGCCTATGGGGGGCTCCAGTAGGGAATCTTGCGCAATGGACGAAAGTCTGACGCAGCG  
ACGCCGCGTGAGGATGAAGGTCTTAGGATTGTAACTTCTGTTAAGTGGGAAAAAAGTA  
TCATTCCCTAATACGAGTGAGAGATGATGGTACCACTAGAGAAAGCACCGGCTAATCTCGT  
GCCAGCAGCCGCGTAATACGAGAGGTGCGGGCGTTATTCGGAATTATTGGGTGTAAGGG  
CGCGTAGACGGCGTGTTAAGTTTGTGTTAAATCCTCCGGCTCAACCGGAGATATGCGGC  
AAATACTGGCATGCTAGAGGATGGAAGAGAGAAGTGGAATCTTGAGTAGCGGTAAAT  
GCGTAGATCTCAAGAGGAACACCGATGGCGAAGGCAGCTTCTTGGTCCATTCCTGACGTT  
GAGGCGCGAAAGCGTGGGGAGCAAACAGGATTAGATACCCGCGTAGTCC

>Otu26947

CCAGCCTATGGGTGGCAGCAGTAGGGAATCTTCCACAATGGGCGAAAGCCTGATGGAGCA  
ACGCCGCGTGAGGATGAATGGCTTCGGCCCGTAAACTCCTGTCATTTGCGAACAAATTA  
GCTACCCAACACGTGGATTATTGATTGTAGCGGAAGAGGAAGGGACGGCTAACTCTGTG  
CCAGCAGCCGCGTAATACAGAGGTCCCAAGCGTTGTTTCGATTCACTGGGCGTAAAGGG  
TGCGTAGGCGGTTGGGTAAGTTTGACGTGAAATCTCCGGGCCTAACCCGAAACTGCGTT  
GAATACTACCCGGCTAGAGGATTGGAAGGGAGACTGGAATACTTGGTGTAGCAGTGAAAT  
GCGTAGATATCAAGTGGAACACCGATGGCGAAGGCAGCTTCTTGGACAATTCCTGACGCT  
GAGGCACGAAAGCCAGGGGAGCAAACGGGATTAGAAACCCGTGTAGTCC

>Otu26969

CCAGCCTACGGGGCGCACCAAGTGGGGAATCTTGCGCAATGGACGAAAGTCTGACGCAGCC  
ACGCCGCGTGAGTGAAGAAGGCCTTCGGGTGTAAAGCTCTGTGCTCGGACGAAAAAT  
TTTAGGGTGAATAGCCCTAGAATCTGACGGTACCGAGAGAGGAAGCACCGGCTAACTCCG  
TGCCAGCAGCCGCGTAATACGGAGGGTGCAAGCGTTGCTCGGAATTATTGGGCGTAAAG  
GGTAGGTAGGTGGTCTTATTTGTCTGGGGTGAAATCCTTGAGCTTAACTCAAGAAGTGCC  
TCAGAAACGGTGAGACTAGAGTCCTAGAGAGGGTTCGTGGAATTCCTGGTGTAGCGGTGAA  
ATGCGTAGAGATCGGGAGGAACACCAGAGGGCGAAGGCGGCGACCTGGATAGGAACTGACA  
CTAAACTACGAAAGCGTGGGGAGCAAACAGGATTAGAAACCCGGGTAGTCC

>Otu26977

CCAGCCTATGGGTCGCTGCAGTGGGGAATCTTGACAAATGGGCGAAAGCCTGATGCAGCG  
ACGCCGCGTGAGCGATGAAGGCCTTCGGGTTGTAAAGCTCTGTGGGGAGGGACGAATAAG  
TACTGGCCAATATCCAGTATGATGACGGTACCTCCTTAGCAAGCACCGGCTAACTCTGTG  
CCAGCAGCCGCGGTAAGACAGAGGGTGCAAACGTTGTTTCGGAATCACTGGGCGTAAAGCG  
CGTGTAGGCGGCTATATAAGTCGGACGTGAAAGCCACGGCTCAACCGTGGAAGTGCGCT  
CGAAACTGCGTAGCTTGAGTCTTGGAGAGGAAGGCGGAATACTTGGTGTAGAGGTGAAAT  
TCGTAGATATCAGGTAGAACACCAGTGGCGAAGGCGGCCTTCTGGCCAAATACTGACGCT  
GATGCTCGAAAGCTAGGGGAGCAAACAGGATTAGATACCCGAGTAGTCC

>Otu26989

CCAGCCTACGGGACGCTGCAGCCGAGAATCTTTCGCAATGGGCGAAAGCCTGACGAAGCG  
ACGCCGTGTGAGCGAAGAAGGCCTTCGGGTTGTAAAGCTCTTTCGCTAGGGAACAAGAGA  
GACGGATTAATACTCCGTTGATTTGATGGTACTTGGTAAAGAAGCACCGGCTAACTCCGT  
GCCAGCAGCTGCGGTAATACGGAGGGTGCAAGCATTGATCGGAATTACTGGGCGTAAAGG  
GCGCGTAGGCGGTTAGGAAAGTCGGGCGTGAAATTCCGGGGCTCAACCCCGAGCGGCAC  
TCGAAACTTCCTAGCTAGAGTTTCAAGTTAGGGAAAACGGAACTCCACGTGTAGCGGTGAAA  
TGCGTAGATATGTGGAAGAACACCAGTGGTGAAGACGGTTTTCTGGGCTGATACTGACGC  
TGAGGAGCGAAAGCGTGGGGAGCGAACAGGATTAGAAACCCGAGTAGTCC

>Otu27006

CCAGCCTATGGGAGGCAGCAGTGGGGAATATTGGACAATGGGGGCAACCCTGATCCAGCA  
ATACCGCGTGTGTGAAGAAGGCCTTAGGGTTGTAAAGCACTTTAGTTGGGGAAGAAGATA  
TGGAGTTTAAGAGACACCATAATTTGACTGTACCCAAAGAATAAGCACCGGCTAACTCTGT  
GCCAGCAGCCGCGGTAATACAGAGGGTGCAAGCGTTAATCGGAGTTACTGGGCGTAAAGG  
GCGCGTAGGTGGTTATATAAGTTGGATGTGAAATCCCTGGGCTTAACCTAGGAACTGCAT  
TCAAGACTGTATGACTAGAGTACTGTAGAGGGTAGTGGAATTTCCGGTGTAGCGGTGAAA  
TGCGTAGAGATCGGAAGGAACACCAGTGGCGAAGGCGGCTACCGGGACAGATACTGACAC  
TGAGGCGCGAGAGCGTGGGGAGCAAACAGGATTAGAAACCCGCGTAGTCC

>Otu27034

CCAGCCTATGGGGGGCTGCAGTATTAGGATCGTGAAAAGCATCATCCTTGTAGGTAGCGT  
TCAACGCAGCCACTGCTGTGCAAGCGTGCGTTAACGCCAGCGAGTGCATCTTGAAATACT  
GCCGAAGATCAGCGTCTTTTCTGTCCCAAGCTGCTTAGGATCCGCGAGGGCGGTGATAA  
TGTCTGATGCTGGGATGCCTAGTTCGTGCATCTGGGAGGCATAGCCCTCTTTCGTAAAGT  
CTCCTACGTGCTGAATCTTCGGATCTTGCGAGGCAGCGGCGTAGATGCCC GCGAGGCCCT  
CGGCCTGCGCGCGCTTGTTCCTCAGCATAGTCCGTAGCGTATTTGCGTCGAGATTTTGT  
TCTGCGCCACATTGTTTCGCAATATCAGGTGCCAGATATGCAGTATCTTGATTAGAGACCC  
CAGTAGTCC

>Otu27036

CCAGCCTACGGGGTGCGAGCAGTGGGGAGTTTTGCGCAATGGGGGAAACCCTGACGCAGCC  
ATGCCGCGTGAATGATGAAGGTCTTAGGATTGTAAAATTCTTTCAGCAGGGACGATAATG  
ACGGTACCTGCAGAAGAAGCACCGGCAAACCTTCGTGCCAGCAGCCGCGGTAATACGAAGG  
GTGCGAGCGTTGTTTCGGAATTACTGGGCGTAAAGGGTTTCGTAGGCGGGAATGCAAGTCAA  
GTGTGAAATCCCCAGGCTCAACCTGGGACGTGCATTTGAGACTGTGTTTCTTGAGTTTCG  
GAGAGGGTGGTGGAATTGCTGGTGTAGGAGTGACATCCGTAGAGATCAGCAGGAACACCG  
GAGGCGAAGGCGACCACCTGGCCGAATACTGACGCTGAGGAACGAAAGCGTGGGGAGCAA  
ACAGGATTAGAAACCCTGGTAGTCC

>Otu27057

CCAGCCTATGGGTCGCACCAGGATACACGGTTGATTTCGTAAATAACGATATCACCGGGTT  
TCAACACAGAGGCGATCGTCCGCGTGGCACCAAGGATGGCGGATAGATCCGGCTGGTTGT  
GTGCATCAATCGGCGTTGGAACAGTAGCGATGTAGACATTGCATTTACGCAGGTGCTCGA  
CGTTCTCTGTGAAAGACAGACCGGTTGCCTGCGCGAGGTCGTCACGCTCTACCTCCAGAG  
TCCTGTGCGACGCCATCGTTCAGATCGGCGAGTTCGAGTCTTGTTGATGTGCAAGCCGACCA  
CCCCGCGCTTCTTACCGAATTCGACCGCAAGTGGCAGGCCGACGTACCCCAAGCCGATTA  
CCGCAAGTTTGACTTCTTTTAAACGAATCATTTTCGTGCCCTGTTATTAGAGACCCTAGTA  
GTCC

>Otu27058

CCAGCCTACGGGACGCAGCAGTGGGGAATATTGCGCAATGGGGGAAACCCTGACGCAGCA  
ACGCCGCGTGAGTGAAGAAGGCCTTCGGGTTGTAAAGCTCTTTCGGTTGGGAAGAAGGGG  
AGCACAGTTAATAAGTGTGCTCTTTGATGGTACCAAAAGAAGAAGCACCGGCAAACCTTCG

TGCCAGCAGCCGCGGTAATACGAAGGGGGCTAGCGTTGCTCGGAATGACTGGGCGTAAAG  
GGCGCGTAGGCGGTTTTAGACAGTCAGACGTGAAATTCCTGGGCTTAACCTGGGGGCTGCG  
TTTGATACGTCTAGGCTTGAGTGAGGAAGAGGGTTCGTGGAATCCCAGTGTAGAGGTGAA  
ATTCGTAGATATTGGGAAGAACACCGGTGGCGAAGGCGGCGACCTGGTCCTTTACTGACG  
CTGAGGCGCGAAAGCGTGGGGAGCAAACAGGATTAGAGACCCTTGTTAGTCC

>Otu27093

CCAGCCTACGGGGTGCAGCAGTTTCGAATCATTACAAATGGGCGAAAGCCTGATGGTGCG  
ACGCCGCGTGGGGGATGAATGGCTTCGGCCCGTAAACCCCTGTCATTTGCGAACAAACCT  
TGTCATTTAACACGTGGCAAGCTGATTGTAGCGAAAGAGGAAGGGACGGCTAACTCTGTG  
CCAGCAGCCGCGGTAATACAGAGGTCCCAAGCGTTGTTTCGGATTCACTGGGCGTAAAGGG  
TGCGTAGGTGGCCGGGTAAGTCTGATGTGAAATCTCGGAGCTTAACTCCGAAACTGCATT  
GGATACTATCCGGCTGGAGGGTCGGAGGGGGGACTGGAATTCTCGGTGTAGCAGTGAAAT  
GCGTAGATATCGAGAGGAACACCAGTGGCGAAGGCGAGTCCCTGGACGACTCCTGACACT  
GAGGCACGAAAGCTAGGGGAGCAAACAGGATTAGATACCCCAGTAGTCC

>Otu27115

CCAGCCTACGGGTGGCAGCAGTGGGGAATATTGGACAATGGGCGAAAGCCTGATCCAGCA  
ATGCCGCGTGAGTGATGAAGGCCTTAGGGTTGTAAAGCTCTTTTCGCACGCGACGATGATG  
ACGGTAGCGTGAGAAGAAGCCCCGGCTAACTTCGTGCCAGCAGCCGCGGTAATACGAAGG  
GGGCTAGCGTTGTTTCGGAATTACTGGGCGTAAAGGGCGCGTAGGCGGCGTGACCAGTTAG  
AAGTGAAATCCTCGGGCTCAACCTGAGAATTGCTTTTAATACTGTCACGCTAGAGTTCGG  
GAGAGGTGAGTGGAATTCACAGTGTAGAGGTGAAATTCGTAGATATTGGGAAGAACACCA  
GTGGCGAAGGCGGCTCACTGGCCCGGTACTGACGCTGAGGTGCGAAAGCGTGGGGAGCAA  
ACAGGATTAGATACCCGGTAGTCC

>Otu27117

CCAGCCTATGGGAGGCAGCAGTAAGGAATATTGGACAATGGTGGCAACACTGATCCAGCC  
ATGCCGCGTGAGTGATGAAGGCGCTACGCGTTGTAAACTGCTTTTGTACCAGAGAAAACC  
TATCTACGTGTAGATAGCTGATAGTATGGTAAGAATAAGCATCGGCTAACTTCGTGCCAG  
CAGCCGCGGTAACACGTAGGGGGCGAGCGTTGTTTCGGAATTACTGGGCGTAAAGGGCATG  
TAGGCGGCTCTGTAAGTCCGGCGTGGAAGCCCACGGCTCAACCGTGGGATTGCGCTGGAA  
ACTGCGGAGCTTGAATCATGGAGAGGGAGCTAGAATTCCTGGTGTAGGGGTGAAATCTGT  
AGAGATCAGGAAGAATACCAGTGGCGGAGGCGAGCTCCTGGCCAATGATTGACGCTGAGG  
TGCAGAAAGTGTGGGGATCAAACAGGATTAGAAACCCCTGTAGTCC

>Otu27145

CCAGCCTACGGGGGGGCTCCAGGCGCGAAAACTTTACAATGCGAGCAATCGTGATAAGGGA  
ACTCCGAGTGCCCGTAAATCGGGCTGTCCGCCAGTGTAATAACTGGTGAAGAAAGGGC  
CGGGCAAGACCGGTGCCAGCCGCCGCGGTAATACCGGCGGCTCGAGTGGTGGCCACTATT  
ACTGGGCTTAAAGCGTTCGTAGCTGGTCTGTAAAGTCTCTGGGGAAATCTTCCGGCTTAA  
CCGGAAGGCGTCTCAGGGATACTGGCAGACTAGGGACCGGGAGAGGTGAGAGGTACTCCA  
GGGGTAGGAGTGAAATCCTATAATCCCGGGAAGACCACCAGTGGCGAAGGCTGTCTGCTA  
GAACGCGCCCCGACGGTGAGGGATGAAAGCTGGGGGAGCGAACCGGATTAGAAACCCTAGT  
AGTCC

>Otu27153

CCAGCCTATGGGTCGCTGCAGCTAAGAATCTTCCGCAATGGGCGAAAGCCTGACGGAGCG  
ATGCCGCGTGATCGATGAAGGTCGAGAGATTGTAAAGATCTTTTACAACCTGAGGAATAAG  
CCTAGGAGGGAATGCCTGGGTGATGACGTTAAGTTGTGAATAAGCCCCGGCTAATTACGT  
GCCAGCAGCCGCGGTAACACGTAAGGGGCGAGCGTTGTTTCGGAATTATTGGGCGTAAAGG  
GCACGCAGGCGGTTTTACAAGTCCGATGTTAAAGACCTGGGCTTAACTCAGGGGATGCGT  
TGGAACCTGTAAGACTAGAGTATTAGAGGGGGAGTCGGAATTCCTAGTGTAGGGGTGAAA  
TCTGTTGATATTAGGAAGAACACCGGTGGCGAAGGCGGACTCCTGGCTGAATACTGACGC  
TGAGGTGCGAAAGCATAGGGAGCAAACAGGATTAGATACCCCTTGTTAGTCC

>Otu27158

CCAGCCTATGGGTTGCTGCAGTCGAGGATCTTCGGCAATGGGCGCAAGCCTGACCGAGCG  
ACGCCGCGTGCGGGATGAAGGCCTTCGGGTGTAAACCGCCGTCGGAGTGGAGGAAATTT  
CAGGGGGTTCCCCCTTGGAATTGACTAATACTCAGAGGAAGGACGGGCTAAGTTCGTGCCA  
GCAGCCGCGGTAAGACGAACCGTCCAAACGTTATTCGGATTCACTGGGCTTAAAGGGTGC  
GTAGGCGGCTCAGAAAGTAGGGTGTGAAAGCCCTCGGCTCAACCGAGGAATTGCGCCCTA  
AACTACTGGGCTAGAGGGGAGACAGAGGTAAGCGGAACCTTAGGGTGGAGCGGTGAAATGCG  
TTGATATCCTAAGGAACGCCAGGAGCGAAAGCGGCTCACTGGACCACAACCTGACGCTGAG

GCGCGAAAGCTAGGGGAGCAAACAGGATTAGAAACCCTGGTAGTCC

>Otu27170

CCAGCCTATGGGTCGCTGCAGTGGGGAATTTTGGACAATGGACGCAAGTCTGATCCAGCC  
ATGCCGCGTGCGGGAAGAAGGCCTTCGGGTGTAAACCGCTTTTGTACAGGAAGAAAAGG  
CACCTCTAATACAGGGGGCTCATGACGGTACCTGAAGAATAAGCACCGGCTAACTACGT  
GCCTGCAGCCGCGTAATGCGTAGGGTGCAAGCGTTAATCGGAATTACTGGGCGTAAAGC  
GTGCGCAGGCGGTTATGCAAGACAGAGGTGAAATCCCCGGGCTCAACCTGGGAACTGCCT  
TTGTGACTGCATGACTAGAGTACGGTAGAGGGGGATGGAATTCGCGTGTAGCAGTGAAA  
TGCGTAGATATGCGGAGGAACACCGATGGCGAAGGCAGTCCCCTGGACCTGTACTGACGC  
TCATGCACGAAAGCGTGAGGAGCAAACAGGATTAGAAACCCCTGTAGTCC

>Otu27189

CCAGCCTATGGGTGGCAGCAGTGAGGAATATCGGACAATGAGCGAAAGCTTGATCCAGCA  
ATGTCAAAAAAGGAAGACGGCTACTATCAGGTCTTAACTTTGTTCATTCAAAAAGGAA  
TATGACAGTATTTGAATGAAAGCCCCGGCTAACCTCGTGCCAGCAGCCGCGTAATACGA  
GGGGGGCAGGCGTTATTCGGTATAACTAGGCGTAAAGGGTCCGTAGGCGGCAAGTTCAGT  
TGTTAGGTAAAGACTAAGGCTCAACCTTAGAAACTAACAATACGTTCTTAGCTAGAGTA  
ATATATGGGATAGTAGAATTTCTGCAGTAGGGATGAAATCCTTTGACTACAGAAGGAATA  
TCAAAGGCGAAGGCAACTATCTGGATATTACTGACGCTGAGAGACGAAGGCATGGGTAGC  
AAATGGGATTAGAAACCCCCGTAGTCC

>Otu27196

CCAGCCTATGGGTGGCACCAGTAGGGAATTTTGCGCAATGGGCGAAAGCCTGACGGAGCG  
ACGTTTCGTGGATGATGAAGCCCTTTGGGGGTAAAGTCCTTTTATGTGGGAGGAAATTA  
TTGACAGTACCACATGAATAAGAGGATCCTAATTCTGTGCCAGCAGGAGCGGTAAGACAG  
AATCCTCGAGCGTTACCCGGATTTATTGGGCGTAAAGGGTCCGTAGGTGGCGCAGTAAGT  
TGAAAGTTAAACTCATCGGCTTAACCTTTGAGGTGCTTTCAATACTGCTGTGCTAGAGG  
GCGTTAGGGGTAGCGGAACCGACGGAGTAGGGGTGAAATCCGTTGATATCGTCGGGAAC  
ACCAAAGCGAAGGCAGCTAACTAGGATGACCCTGACACTGAGGGACGAAAGCGTGGGGA  
GCAAAAAGGATTAGAGACCCCTCGTAGTCC

>Otu27216

CCAGCCTATGGGTTGCAGCAGTCGAGAATTTTTCACAATGGGCGAAAGCCTGATGGAGCG  
ACGCCGCGTGGGGGATGAATGGCTTCGGCCCGTAAACCCCTGTCAATTTGCGATCAAACCG  
CATTAATTTAAAGATGATGCGCTGATAGTAGCGAAAGAGGAAGGGACGGCTAACTCTGTG  
CCAGCAGCCGCGTAATACAGAGGTCCCAAGCGTTGTTTCGATTCACTGGGCGTAAAGGG  
TGCGTAGGTGGTGAGGTAAGTCGGATGTGAAATCTCGGAGCTCAACTCCGAAACTGCATT  
GGAAACTGCCTTGCTAGAGGGTTGGAAGGGGGACTGGAATTCTCGGTGTAGCAGTGAAAT  
GCGTAGATATCGAGAGGAACACCAGTGGCGAAGGCAGTCCCTGGACAACCTCTGACACT  
GAGGCACGAAAGCTAGGGGAGCAAACAGGATTAGAGACCCCCGTAGTCC

>Otu27218

CCAGCCTATGGGTGGCAGCAGTGAGGAATATTGCGCAATGGGGGCAACCCTGACGCAGCA  
ACGCCGCGTGGGTGAAGAAGGTCTTCGGATTGTAAAGCCCTTTTCGGCGGGGACGATGATG  
ACGGTACCCGCGAGAAGAAGCCCCGGCTAACTTCGTGCCAGCAGCCGCGGTAATACGAAGG  
GGGCTAGCGTTGCTCGGAATGACTGGGCGTAAAGGGCGCGTAGGCGGTTTAGACAGTCAG  
ATGTGAAATTCCTGGGCTTAACCTGGGGGCTGCATTTGATACGTCTAGGCTTGAGTGAGG  
AAGAGGGTTGTGGAATTCACAGTGTAGAGGTGAAATTCGTAGATATTGGGAAGAACACCG  
GTGGCGAAGGCGGCAACCTGGTCCTTTACTGACGCTGAGGCGCGAAAGCGTGGGGAGCAA  
ACAGGATTAGATAACCCGCGTAGTCC

>Otu27225

CCAGCCTATGGGGGGCAGCAGTGAGGAATATTGGTCAATGGGCGAAAGCCTGAACCAGCC  
ATGCCGCGTGAAGGATGAAGGCCCTATGGGTTGTAACTTCTTTTGTACGGGACGAACCA  
TTTCTACGTGTAGAGATCTGACGGTACCGTATGAATAAGCAACGGCTAACTCCGTGCCAG  
CAGCCGCGGTAATACGGAGGTGCAAGCGTTATCCGGATTTATTGGGTTTAAAGGGTGCG  
TAGGCGGACTTATAAGTCAGTGGTGAAATCTCATCGCTTAACGATGAACGTGCCATTGAT  
ACTGTAGGTCTTGAGTACAGATGCCGTTGGCGGAATGTGTTCATGTAGCGGTGAAATGCAT  
AGATATGACACAGAACACCGATTGCGAAGGCAGCTGACGAACTGTAACCTGACGCTGAGG  
CACGAAAGCGTGGGGATCAAACAGGATTAGATAACCCGCGTAGTCC

>Otu27234

CCAGCCTACGGGGGGCTGCAGTTAAGAATCTTGGACAATGGACGAAAGTCTGATCCAGCG  
ACGCCGCGTGAACGATGAAGGTCTTCGGATTGTAAAGTTCAGTAAGATGGGACGAAGAAG

CAAGAGGTAATATTTCTTGTGGTGACGGTACCATCCTAAAGCTTCGGCTAAATACGTGCC  
AGCAGCCGCGGTAATACGTATGAAGCAAGCGTTGTTTCGGAATTATTGGGCGTAAAGGGCA  
TCTAGGCGGGATGTTAAGTCAGGTGTGAAATTCACGGCTCAACCGTGGAAGTGCATTTG  
ATACTGGCATTCTTGAGTTCGGAAGAGGAAGGCGGAATTCCCGGTGTAGCGGTGAAATGC  
GTAGATATCGGGAAGAACACCGGTGGCGAAGGCGGCCTTCTGGTCCAGGACTGACGCTGA  
CATGCGAAAGTGTGGGGATCAAACGGGATTAGATACCCCTGTAGTCC

>Otu27240

CCAGCCTATGGGAGGCTCCAGTCGAGAATCTTCCACAATGGACGAAAGTCTGATGGAGCG  
ACGCCGCGTGATTGATGAAGTCCCTTTGGGGCGTAAAGATCTTTTATGAGGGAAGAAGTT  
TATTGACTGTACCTCATGAATAAGAGGCTCCTAATCTCGTGCCAGCAGGAGCGGTAATAC  
GAGAGCCTCGAGCGTTATCCGGAATTATTGGGCGTAAAGGGTGCGTAGGTTGTTTTGCTA  
GTCTTTGGTCAAAGCCCTGTGCTCAACACAGGATCTGCCACAGAAACGGCAAACCTTGAA  
AGTGCGAGAGGTGTACGGAATCATGGTGTAGGGGTGAAATCCGTTGATATCATGGGGAA  
CACCGAAAGCGAAGGCAGTACACTGGCGCATATTTGACACTGAAGCACGAAAGCGTGGGT  
AGCGAATGGGATTAGATACCCCTGTAGTCC

>Otu27259

CCAGCCTACGGGTGGCAGCAGTCGAGAATTTTTCTCAATGGGGGAAACCCTGAAGGAGCG  
ACGCCGCGTGAAGGATGAAGGTCTTCGGATTGTAAACTTCTGTATTAGAGAACAATTGC  
ACGGGAAGTAACTGTCCCGTGCTTGATAGTACCTGAAGAGGAAGAGACGGCTAACTCTGT  
GCCAGCAGCCGCGGTAATACAGAGGTCTCAAGCGTTGTTTCGGATTCAATTGGGCGTAAAGG  
GTGCGTAGGTGGTGCCGTAAGTTGGATGTGAAATCCCGGAGCTTAACTCCGGAAGTGCAT  
TCAATACTGCGGTGCTTGAGTACTGGAGAGGAGATCGGAATTCACGGTGTAGCAGTGAAA  
TGCGTAGATATCGTGAGGAGGACCAGTGGCGAAGGCGGATCTCTGGACAGTTACTGACAC  
TGAGGCACGAAGGCCAGGGGAGCAAACGGGATTAGAAACCCCGGTAGTCC

>Otu27266

CCAGCCATGGGGGCAGCAGTCGAGAATCTTCCGCAATGGGCGAAAGCCTGACGGAGCGAC  
GTCGCGTGATGGATGAAGTTCTTCGGAACGTAAACATCTTTTATTGGGGAGAAAATTTTG  
ATAGTACTCAATGAATAAGGGGTTGCTAAACTCGTGCCAGCAGCAGCGGTAATACGAGTG  
CCCCGAGCGTTATCCGGAATTACTGGGCGTAAAGCGTGTGTAGACGGTGCGATTAGTCGT  
TCGTTAAAGCTCCCGGCTTAACCGGGAAAGGGCGGACGAAACGGTTCGCGCTGGAGGAGGC  
GAGGGGTCTATGGAATCATGGTGTAGGGGTGAAATCCGTTGATATCATGGGGAACACCG  
AAAGCGAAGGCAGTAGACTGGCGCCTTACTGACGTTGCAACACGAAAGCGTGGGGATCAA  
ACGGGATTAGAAACCCGAGTAGTCC

>Otu27276

CCAGCCTATGGGTTGCTGTCAGTCGCGAATCTTTTGCAATACACGAAAGTGTGACAAAGCG  
AGCCAAAGTGTTTTCCGCACAGGAAAACCTTTTGTCAGCTGTAAACAGGCTGACGAATGAG  
GACTGGGCAAGACTGGTGCCAGCCGCCGCGGTAATCCAGCAGTCCAAGTTGCAGCCAAC  
TTTATTAGGTCTAAACATCCGTAGCTTGTCTAATAAGTTCTTTGTGAAATCTGGCATCT  
TAAGTGTGAGTCGTGCAAAGAATACTATTGGGCTAGGGACTGGTAGATGTAAGGAGTACA  
CTTAAGGTAGTGGTAAAATACGTTAATCTTAGGTGGACTAACAATTGGCGAAGGCACCTT  
ACAAGGACAGATCCGACAGTGAGGGATGAAGGCTAGGGGCGCAAACCGGATTAGATACCC  
GTGTAGTCC

>Otu27303

CCAGCCTATGGGTTCGAGCAGCTAAGAATATTCGCAATGGACGAAAGTCTGACGGAGCG  
ACGCCGCGTGATGACGAAGGCCGAAAGGTTGTAAAGTCCTTTTGTGGGGAAGAATAAC  
CATGGGAGGGAATGCCCGTGGGATGACATGAACCGACGAATAAGCCCCGGCTAACTTCGT  
GCCAGCAGCCGCGGTAATACGAAGGGGGCTAGCGTTGTTTCGGATTTACTGGGCGTAAAGC  
GCACGTAGGCGGATCTTTAAGTCAGGGGTGAAATGCCAAGGCTCAACCTTGGAAGTGCCT  
TTGATACTGGGGATCTTGAGTTCGGGAGAGGTGAGTGGAAGTGCAGAGTGTAGAGGTGAAA  
TTCGTAGATATTCGCAAGAACACCAAGTGGCGAAGGCGGCTCACTGGCCCGATACTGACGC  
TGAGGTGCGAAAGCGTGGGGAGCAAACAGGATTAGAAACCCGAGTAGTCC

>Otu27323

GGACTACCCGGGTCTCTAATCCTGTTTGCTCCCCACGCTTTCGCGCCTCAGTGTGAGTTA  
CGGACCAGGAGACCGCCTTCGCTACTGGTGTTCTTCATGATATCTACACATTTACCCGT  
ACACCATGAATTCCATCTCCCTCTGCCGTAAGAGCCTCAGTATCGAGGGCAATTCT  
GCAGTTAAGCTGCAGGATTTACACCCGACTTAAAGCCCCACCTACACGCCCTTTACACC  
CAGTAATTCCGGACAACGCTCGGATCCTACGTATTACCGCGGCTGCTGGCACGTAGTTAG  
CCGATCCTTATTTCGAGGGTACGGTCAAGTCCCGCCGAAGCGGGAACATTCATCCCTCG

AAAAGAAGTTTACATCCTAACGGACTTCATCCTTCACGCGGCGTCGCTGCGTCAGCCTTT  
CGGCCACTGCGCAATATTCCCTCACTGCTGCCCCCGTAGGCTGG  
>Otu27364  
CCAGCCTATGGGGTGCACCAGTCGAGAATCTTCGGCAATGGGGGAAACCCTGACCGAGCG  
ACGCCGCGTGCGAGATGAAGGCCTTCGGGTGTAAATCGCTGTCAGAGGGGAGGAAATGC  
CGGTGGGTTCCTCCCATCAGTTTGACCTAGCCTCAGAGGAAGGACGGGCTAAGTTCGTGCC  
AGCAGCCGCGGTAAGACGGACCGTCCAAACGTTATTTCGGAATCACTGGGCTTAAAGGGTG  
CGTAGGCGGCCCCGGAAGTTGGGTGTGAAAGCCCTCGGCTCAACCGAGGAATTGCGCCCA  
AAACTGCCGGGCTAGAGGGAGACATAGGTGAGCGGAACCTAGGGTGGAGCGGTGAAATGC  
GTTGAGATCCTAAGGAACACCAGTAGCGAAAGCGGCTCACTGGGTCTCTTCTGACGCTGA  
GGCTCGAAAGCGTGGGGAGCAAACAGGATTAGATACCCCTGTAGTCC  
>Otu27365  
CCAGCCTATGGGACGCACCAGTAAGGAATATTGGACAATGGTGGCAACACTGATCCAGCC  
ATGCCGCGTGCGAGGATGAAGGCGCTACGCGTTGTAAACTGCTTTTGTACCAGAGAAAACC  
TATCTACGTGTAGATAGCTGATAGTATGGTAAGAATAAGCATCGGCTAACTTCGTGCCAG  
CAGCCGCGGTAATACGAAGGGGGCTAGCGTTGTTTCGGATTTATTGGGTTTAAAGGGTGCG  
TAGGCGGACTTATAAGTCAGTGGTGAAATCTCGTCGCTTAACGACGAACGTGCCATTGAT  
ACTGCCATTCTTGAGTATAGTTGAGGTAGGCGGAATGTGTAATGTAGCGGTGAAATGCTT  
AGATATTACACAGAACACCAATTGCGTAGGCAGCTTACTAAACTAAAAGTACGCTGAGG  
CACGAAAGCGTGGGGAGCAAACAGGATTAGATACCCGTGTAGTCC  
>Otu27371  
CCAGCCTATGGGTGGCTGCAGTGGGGAATTTTGGACAATGGGCGAAAGCCTGATCCAGCA  
ACGCCGCGTGGAAGGATGAAGGTCTTCGGATTGTAAACTTCTTTTAGAGGGAACGAAACGC  
CCGTTTTATCCGGGTTTGACGGTACTCTCAGAAAAAGCCACGGCTAACTACGTGCCAGCA  
GCCGCGGTAATACGTAGGTGGCGAGCGTTACTCGGAATTACTAGGCGTAAAGCGCATGTA  
GGCGGTTAGATAAGTCTGTAGTGAAATTTCCCGGCTCAACTGGGAAGGGTCTATAGATAC  
TGTCTGGCTTGAGTGTGGCAGGGGGAGACGGAATTCCTGGGCAATACTGACGCTGAGGTG  
ATATCGGGAGGAACACCAATGGCGAAAGCAGTCTCCTGGGCCAATACTGACGCTGAGGTG  
CGAAAGCTAGGGGAGCGAATGGGATTAGAAACCCCGGTAGTCC  
>Otu27391  
CAGCCTATGGGGGGCTCCAGTTCGGAATATTTCGGCAATGAGCGCAAGCTTGACCGAGCGA  
CGCCGCGTGCGGGATGAAGGCCCTCTGGGTATATAAACCGCTGTCACAGGTGAGCAAGTCA  
CAAGGTGTCAACACCATCTTGTGTTGAGTTAGGCTTGAGAGGAAGCCCCCGCTAATCACG  
TGCCAGCAGCGCGGTAATACGTGAGGGGCGAACGTTGTTTCGGTGTCACTGGGCTTAAAG  
GGTGCGTAGGTGGCTGCGTAAGTAACGTGTGAAAGCCCTCGGCTTACCCGGGGAACCTGCG  
CGTTATACTGCGTGGCTTGAGGATCTCAGGGGAAGGGGGAACCTCCAGGTGTAGCGGTGAA  
ATGCGCAGATATCTGGGGGAAGGCCGGCGCGAAGGCGCCCTTCTGGGGGATTCTCTGACA  
CTGAGGCACGAGAGCGTGGGGAGCAAACAGGATTAGATACCCTCGTAGTCC  
>Otu27400  
CCAGCCTACGGGGGGCACCAGGCGCGAAACCTTTACAATGCGCGAAAGCGTGATAGGGGA  
ACTCTGAGTGGCGTTGGGACTTTCGTTCCCTCGTCTTTTGCCAAGTCTAGATAGCTTGAG  
AATAAGTGCTGGGTAAGACCAGTGCCAGCCGCGCGGTAATACTGGCAGCACGAGTGGT  
TCCACGAATATTGGGTCTAAAGAGACCGTAGCCGGTCCATTAAAGTCTTCTGTGAAATCTT  
GGGCTTAAACCTCAAGGCGTGACGGGGATACTGGTGAGACTTGAGGGTGGGGGAGGTCAA  
GAGTACTTATGGGGTAGGGGTAAAATCCTGTAATCCTATAAGGACTCCCAGTGCGGAAGG  
CGCTTGACCAAAACACGTCTGACGGTGAGGGTCTGAAGGCTAGGAGAACGAATCGGATTAG  
ATACCCCGTAGTCC  
>Otu27414  
CCAGCCTATGGGGGGCTGCAGTCGAGGATTTTTCTCAATGGGGGAAACCCTGAAGGAGCG  
ACGCCGCGTGGGGGATGAAGGTCTTCGGATTGTAAACCCCTGTCATGCGGGATCAATGCT  
TACAACCTAACACGTTGTAAAGTTGATAGTACTGCAAGAGGAAGCCGTGGCTAACTCTGTG  
CCAGCAGCCGCGGTAATACAGAGACGGCAAGCGTTGTTTCGGATTCAATTGGGCGTAAAGGG  
TCCGCAGGCGGTCCGGTAAGTCGGGTGTGAAATCCCGTGGCTTAACCACGGAAGTCATT  
CGAAACTGCCGGGCTCGAGGACTGGAGAGGAGACTGGAATTGTTCGGTGTAGCGGTGAAAT  
GCGTAGATATCGACAAGAACACCAGCAGCGAAGGCGAGTCTCTGGACAGTTCTTGACGCT  
GAGGGACGAAAGCTAGGGGAGCAAACGGGATTAGAGACCCGTGTAGTCC  
>Otu27416  
CCAGCCTACGGGGGGCTGCAGTCGGGAATTTTGCTCAATGGGCGAAAGCCTGAAGCAGCA

ACGCCGCGTGAGGGATGACGGCCTTCGGGTGTAAACCTCTTTTCTCAGGGACGATAATG  
ACGGTACCTGAGGAATAAGCCACGGCTAACTACGTGCCAGCAGCCGCGGTAATACGTAGG  
TGGCGAGCGTTGTCCGGATTTACTGGGCGTAAAGGGCGCGCAGGCGGTCTGTCAAGTCGA  
GTGTGAAAGCCCCCGGCTCAACTGGGGAGGGTCACTCGATACTGCTCGACTCGAAGGCGG  
GAGAGGGAAGTGGAATTCCTGGTGTAGTGGTGAAATGCGTAGATATCGGGAGGAACACCA  
GTGGCGAAGGCGACTTCCTGGCCCGTTCTTGACGCTGAGGCGCGAAAGCTAGGGGAGCAA  
ACGGGATTAGAGACCCCTGTAGTCC

>Otu27432

CCAGCCTATGGGTGGCAGCAGTGGGGAATTTTGGACAATGGGGGCGACCCTGATCCAGCC  
ATGCCGCGTGCGGGAAGAAGGCCTTCGGGTGTAAACCGCTTTTGGTTCGGGAAGAAAAGG  
CTATCCCTAATAAGGATGACTCTTGACGGTACCGGCAGAATAAGCACCGGCTAACTACGT  
GCCAGCAGCCGCGTAATACGCAGGGTGCAGCGTTAATCGGAATTACTGGGCGTAAAGC  
GTGCGCAGGCGGTTTGTAAAGTCTGATGTGAAAGCCCCGGGCTCAACCTGGGAAGTGCAT  
TGGAAGCTGGCAAGCTCGAGTATGGCAGAGGGGGGTGGAATTCGCGTGTAGCAGTGAAA  
TGCGTAGAGATGCGGAGGAACACCGATGGCGAAGGCAGCCCCCTGGGCCAATACTGACGC  
TCAGGCACGAAAGCGTGGGGAGCAAACAGGATTAGAGACCCGTGTAGTCC

>Otu27438

CCAGCCTACGGGTGGCTGCAGTGGGGAATCTTGCGCAATGGGCGAAAGCCTGACGCAGCA  
ACGCCGCGTGTGTGATGAAGGTCTTCGGATCGTAAAGCACTGTCGCGAGGGACGAGAAGC  
ATAGGGTGAACAATCCTGTGATAGGACGGTACCTCGAGAGGAAGCACCGGCTAACTCTGT  
GCCAGCAGCCGCGTAATACAGAGGGTGCAGCGTTGTTTCGGAATTATTGGGCGTAAGGC  
GCTTGTAGGCGGCACGATAAGTCTACTGTGAAAGCCACGGCTCAACCGTGGGAAGAGCAG  
TAGATACTGTGAGCTTGAATGCCGGAGAGGGTCGCGGAATTCCTGGTGTAGAGGTGAAA  
TTCGTAGATATCGGGAGGAACACCACTGGCGAAGGCGGCGACCTGGACGGACATTGACGC  
TGAGACGCGAAAGCGTGGGGAGCAAACAGGATTAGAAACCCCTCGTAGTCC

>Otu27439

CCAGCCTACGGGGCGCTCCAGTTAGGGATTTTTTGCAATGCGCGCAAGCGTGACAGAGCG  
AGCCAGAGTGTGTTCCATATTGGAACAACTTTTGCCAGCTGTAAAAAGGCTGGCGAATA  
AGGACTGGGCAAGACCGGTGCCAGCCGCCGCGTAATCCCGGCGGTCCGAGTCGCAACCA  
CAATTATTGGGTCTAAAACATCCGTAGCTTGCTTTGTAAGTCTGTTGTGAAATTCTGTCT  
CTTAAGGGCAGAGATTGCAATGGATACTGCAGAGCTAGAGACCGGGGGACGCGATGAGTA  
CATCTGAGGTAGTGGTAAAATACGTTAATCTCAGGTGGACTAACACTAGCGAAGGCACGT  
CGCGATAACGGTTCTGACAGTGAGGGATGAAGGCTAGGGGCGCAAAATGGATTAGATACC  
CCAGTAGTCC

>Otu27440

CCAGCCTACGGGGGGGCACCAGTGAGGAATATTGCGCAATGGACGAAAGTCTGACGCAGC  
GGCGCCGCGTGAAGGATGAAGGCTCTTTGAGTCGTAAACTTCTGTAGAGAGGGAAGAATG  
TCCGTTCTTCGGGATTGACGGTACCTCTAAAGTAAGGATCGGCCAACTACGTGCCAGCA  
GCCGCGGTAGTACATAGGATCCGAGCGTTGTCCGGAATCACTGGGTGTAAAGGGAGCGCA  
GGCGGGCTTTCAAGTCGGTGGTGAAATCTTACAGCTTAACTGTAAACTGCCTCCGATAC  
TGGGAGTCTTGAGTGTGGAAGAGGGCGATGGAATTCATGGTGTAGCGGTGAAATGCGTAG  
ATATCGGGAGGAACACCTGTGGCGAAAGCGGCTCACTGGACCACAACTGACGCTGATGCA  
CGAAAGCTAGGGGAGCAAACAGGATTAGAAACCCCTCGTAGTCC

>Otu27450

CCAGCCTACGGGGTGCAGCAGTGGGGAATTTTGGCAATGGGGGAAACCCTGACGCAGCA  
ACGCCGCGTGAGTGATGAAGGCCTTCGGGTCTGTAAGCTCTGTGAGAGGGAAGAAGTGT  
ATAGTGGCTAATATCCACGATACTTGACGGTACCCTCAAAGGAAGCACCGGCTAACTCCG  
TGCCAGCAGCCGCGTAATACGGAGGGTGCAGCGTTGTACGGATTTATTGGGCGTAAAG  
CGCGTGTAGGCGGCTCCTTAAGTCTGATGTGAAAGCCCTGGGCTCAACCCGGAAGTGCA  
TTGGAAGTGGGGAACCTGAATACGGGAGAGGGTAGTGGAATTCCTGGTGTAGGAGTGAA  
ATCCGTAGATATCAGGAGGAACACCGGTGGCGAAGGCGGCTGCCTGGACCGATATTGACG  
CTGAGACGCGAAAGCGTGGGGAGCAAACAGGATTAGATACCCTCGTAGTCC

>Otu27453

CCAGCCTATGGGGGGCAGCAGTCGAGAATCTTCCACAATGGGGGAAACCCTGATGCAGCG  
ACGCCGCGTGAACGATGAAGCCCTTCGGGGTGTAAAGTTCTTTTCGACGGGGACGATAATG  
ACGGTACCCGGAGAAGAAGCTGCGGCTAACTACGTGCCAGCAGCCGCGGTAATACGTAGG  
CAGCGAGCGTTGTTTCGGAATTACTGGGCGTAAAGAGTGCGTAGGTGGTTGGCTAAGTTTG  
GTGTGAAATCTCCCGGCTCAACTGGGAGGGTGCGCCGAAACTGGCTGGCTAGAGTGTGG



GAGAGGGAAGTGGAAATTCCTGGTGTAGCGGTGAAATGCGTAGATATCAGGAGGAACACCT  
GCGGTGTAGACGGCTTCCTGGACCATGACTGACACTGAGGCACGAAAGCGTGGGTAGCAA  
ACAGGATTAGATACCCAGTAGTCC

>Otu27465

CCAGCCTATGGGGGGCTCCAGTCGAGAATTTTTCACAATGGACGAAAGCCTGATGGAGCG  
ACGCCGCGTGGGGGATGAAGGGCTTCGGCTCGTAGACCCCTGTCATTTGCGAACAAACCT  
TTCCCGTTAACACCGGGAGAGCTGATGGTAGCGAAAGAGGAAGGGACGGCTAACTCTGTG  
CCAGCAGCCGCGGTAATACAGAGGTCCCAAGCGTTGTTTCGGATTCACTGGGCGTAAAGGG  
TGCGTAGGTGGTGAGGTAAGTCGGATGTGAAATCTCTGAGCTCAACTCAGAACTGCATT  
GGATACTACCTTGCTTGAGGATTGGAGGGGGGACTGGAATTCTCGGTGTAGCAGTGAAAT  
GCGTGGAGATCGAGAGGAACACCAGTGGCGAAGGCGAGTCCCTAGACAATTCCTGACACT  
GAGGCACGAAAGCGTGGGGAGCAAAAAGGATTAGATACCCTTGTAGGTCC

>Otu27479

CCAGCCTATGGGGGACCCAGTCGGGAAATTTTGTCAATGCGCGCAAGCGTGACAGAGCAA  
GCCAGAGTGTTTTTCCGTATTGAAAAACTTTTGTGGAATGTAAACAGTTCTACGAATAA  
GGAGTGGGAGAGACTGGTGCCAGCCGCCGCGGTAATCCCAGCACTCCAAGTCGCAGCCAC  
AATTATTGGGTCTAAAACATCCGTAGCTTGCTTGTAGGTCTTTTGTGAAATCGGGCATC  
TTAAGTGTCCGGCGAGCAAAAAGATACTGCTTGGCTAGGGACCGGGAGATGTGAAGAGTAT  
GGATAATGTAGCGTTAAATGCGTTGATCTTATTCAGACTAACACAGCGAAGGCACTTC  
ACAAGAACGGATCCGACAGTGAGGGATGAAGGCTAGGGGCGCAAATTGGATTAGATACCC  
CCGTAGTCC

>Otu27480

CCAGCCTATGGGTTGCACCAGTCGAGGATCTTCGGCAATGGGCGCAAGCCTGACCGAGCG  
ACGCCGCGTGTGCGATGAAGGCCTTCGGGTGTAAAGCACTGTGAGGGGGATCAAGGCG  
CAAGCTTGAGAGATCCCTGGAGGAAGCACGGGCTAAGTTCGTGCCAGCAGCCGCGGTAAG  
ACGAACCGTGCAAACGTTGTTTCGGAACCACTGGGCTTAAAGGGCGCGTAGGCGGCTTGCC  
AAGTCGGGGGTGAAATCCTGCAGCTCAACTGCAGAAGTGCCTTCGATACTGGCGAGCTAG  
AGGAAGGTAGGGGTCTGTGGAACCTCTGGTGGAGCGGTGAAACGCGTTGATATCAGAAGG  
AACGCCGCTGGCGAAAGCGACGGACTGGACCTTTTCAGACGCTGAGGCGCGAAAGCTAGG  
GGAGCAAACGGGATTAGATACCCGCGTAGTCC

>Otu27483

CCAGCCTACGGGGGGCTGCAGTGGGGAATATTGGACAATGGGCGAAAGCCTGACGCAGCA  
ACGCCGCGTGGAGGATGAAGGTCTTCGGATCGTAAACTCCTGTGATGGGGACGAAAGCC  
CGCAAGGGTTTACTGTACCCGTTGAGGAAGCCACGGCTAACTCCGTGCCAGCAGCCGCG  
GTAATACGGAGGTGGCAAGCGTTGTTTCGGAATTACTGGGCGTAAAGGGCGCGTAGGCGGT  
TTGGCAAGTCAGATGTGAAAGCCCCGAGCTTAACTCGGGAAGTGCATCTGAAACTGCTTA  
ACTTGAGTTCTGGATGGGGTAGTGGAATTTCCAGTGTAGCGGTGAAATGCGTAGATATTG  
GGAGGAACACCTGCGGCGAAGGCGGCTACCTGGACAGTGACTGACGCTGAGGCGCGAAAG  
CTAGGGGAGCGAACGGGATTAGAAACCCTAGTAGTCC

>Otu27498

CCAGCCTATGGGGGGCACCAGTAGGGAATATTGCATAATGGGCGAAAGCCTGATGCAGCA  
ACGCCGCGTGTGCGATGAAGGCCTTCGGGTGTAAAGCACTTTTGAAGGGGATGAGGAAG  
GACAGTACCCTTCGAATAAGCTTCGGCTAACTACGTGCCAGCAGCCGCGGTAAACGTAG  
GAAGCGAGCGTTATCCGGATTTACTGGGCGTAAAGCGCATGTAGGCGGTCGGGTAAAGTTG  
GATGTGAAAGCTCCTGGCTTAACTGGGAGAGGTGTTCAATACTACCGGACTAGAGGATG  
GGAGAGGGAAGTGGAATTCCGGGTGTAGTGGTGAATGCGTAGATATCCGGAGGAACACC  
AGTGGCGAAAGCGGCTTCCTGCCCCATAACTGACGCTCAGATGCGAAAGCTAAGGGAGCG  
AACGGGATTAGAAACCCAGTAGTCC

>Otu27506

CCAGCCTACGGGACGCTCCAGTGGGGAATCATGGGCAATGGGCGAAAGCCTGACCCTGCG  
ACGCCGCGTGCAGGATGAAGCTCTTCGGAGTGTAACCGCTGTCAGGGGTTACCAAGCGA  
GGGGAGATAACATCTCCCCGAGTTGAGGAACCCAGAGGAAGCTACGGCTAACTTCGTGC  
CAGCAGCCGCGGTAAGACGAAGGTGGCGAGCGTTGTTTCGGAATCACTGGGCTTAAAGAGC  
ACGTAGGCGGGCCGTCTTGCGTCTGTGAAATCCCCCGGCTCAACCGGGGAATGGCAGGG  
CGAACGGGCGGTCTTGAGGCAGGTAGAGGTGTGGGGAAGTCTTGGTGGAGCGGTGGAATG  
CGTAGATATCAAGAGGAACGCCGGAGACGAAGGTGCCGCACTGGGCCTGTCCTGACGCTG  
AGGTGCGAAAGCCAGGGGAGCAAACGGGATTAGATACCCTAGTAGTCC

>Otu27528

CCAGCCTACGGGTTCGAGCAGTAAGGAATATTGGGCAATGGGCGCAAGCCTGACCCAGCC  
ATGCCGCGTGCAGGATTGACGGCCCTATGGGTGTAAACTGCCTTTGTATGGAAAAAAC  
CCCCGGTCGTGCACCGGGGTTCGATGTTACCATAAGAATAAGCATCGGCTAACTCCGTGCC  
AGCAGCCGCGGTAATACGGAGGATGCAAGCGTTATCCGGATTCATTGGGTTTAAAGGGTG  
CGCAGGCGGAATGGTAAGTCAGTGGTGAAAGCCTACAGCTCAACTGTAGAATTGCCATTG  
ATACTGTCGTTCTGAGTATATTTGAAGTGGGCGGAATGTGTCATGTAGCGGTGAAATGC  
TTAGATATGACACAGAACACCAATCGCGAAGGCAGCTCACTAACTATAACTGACGCTCA  
GGCACGAAAGCGTGGGGATCAAACAGGATTAGATACCCTAGTAGTCC

>Otu27530

CAGCCTACGGGTTCGAGCAGTGGGGAATCTTGCACAATGGGGGCAACCCTGATGCAGCGA  
CGCCGCGTGAACGATGAAGCCCTTCGGGGTGTAAAGTTCTTTTCGACAGGAACGATAATGA  
CGGTACCTGGAGAAGAAGCTGCGGCTAACTACGTGCCAGCAGCCGCGGTAATACGTAGGC  
AGCAAACGTTGTTTCGGAGTTACTGGGCGTAAAGAGTATGTAGGCGGTTTGCTAAGTTTGG  
TGTGAAATCTCCCGGCTTAACTGGGAGGGTTCGCCGAATACTGGCAGGCTTGAGTGTGGG  
AGAGGGAAGCGGAATTCTTGGTGTAGCGGTGAAATGCGTAGATATCAGGAGGAACACCTG  
TGGTGTAGACGGCTTCCTGGACCGCAACTGACGCTGAGATACGAAAGCGTGGGTAGCAAA  
CAGGATTAGAGACCCGGGTAGTCC

>Otu27539

CCAGCCTACGGGGCGCTGCAGTGAGGAATATTGGTCAATGGACGGAAGTCTGAACCAGCC  
ATGCCGCGTGCAGGATGACGGCCCTATGGGTGTAAACTGCTTTTGTACCAGAGAAAACC  
CCAGTACGTGTACTGGGTGTAGTATGGTAAGAATAAGCATCGGCTAACTTCGTGCCAG  
CAGCCGCGGTAAGGCGAAGGATGCAAGCGTTATCCGGATTCATTGGGTTTAAATGGGTGCG  
TAGGCGGACTGATAAGTCAGTGGTGAAATCTTTTGCTTAACAAAGAACTGCCATTGAT  
ACTGTCCGTCTAGAGTATAGATGACGTTGGCGGAATATGACATGTAGTGGTGAAATACTT  
AGATATGTCATAGAACACCGATTGCGAAGGCAGCTAACGAACTATAACTGACGCTGAGG  
CACGAAAGTGCGGGGATCAAACAGGATTAGAGACCCCGGTAGTCC

>Otu27552

CCAGCCTATGGGGGGCTGCAGTAAGGAATATTGGTCAATGGACGGAAGTCTGAACCAGCC  
ATGCCGCGTGCAGGAAGACGGCCCTACGGGTGTAAACTGCTTTTGCAGGGGAATAAACCT  
TTGTATGTATACAAAGTTGAATGTACTCTGAGAATAAGGATCGGCTAACTCCGTGCCAGC  
AGCCGCGGTAATACGGAGGATCCAAGCGTTATCCGGATTTATTGGGTTTAAAGGGTGCGT  
AGGCGGCTTTTTAAGTCAGGGGTGAAAGACGGTAGCTTAACCTATCGCAGTGCCCTTGATA  
CTGAAGAGCTTGAATATAGTTGAGGTAGGCGGAATGTGACAAGTAGCGGTGAAATGCATA  
GATATGTCACAGAACACCAATTGCGGAGGCAGCTTACTAAGCTATGATTGACGCTGAGGC  
ACGAAAGCGTGGGGATCAAACAGGATTAGATACCCTAGTAGTCC

>Otu27556

CCAGCCTATGGGTGGCTGCAGTGGGGAATATTGGACAATGGGCGAAAGCCTGATCCAGCA  
ATGCCGCGTGAGTGATGAAGGCCTTAGGGTGTAAAGCTCTTTTCGGTGGGGACGATGATG  
ACGGTACCCACAGAAGAAGCCCCGGCTAACTTCGTGCCAGCAGCCGCGGTAATACGAAGG  
GGGCTAGCGTTGTTTCGGAATTACTGGGCGTAAAGCGCACGCAGGCGGCTTGATAAATTAG  
GAGTGAAAGCCCTGGGCTCAACCTAGGAATTGCTCTTAAGACTGTCAGGCTTGAATCCAG  
AAGAGGGTAGTGGAATTCCTCAGTGTAGAGGTGAAATTCGTAGATATTGGGAAAAACACCA  
GTGGCGAAGGCGACTGCCTGGTCTGGCATTGACGCTCATGTGCGAAAGCGTGGGGAGCAA  
ACAGGATTAGAAACCCGCGTAGTCC

>Otu27559

CCAGCCTACGGGTTCGACACCAGTTGGGGATTTTGCACAATGGGCGAAAGCCTGATGCAGCG  
ACACAGCGTGAAGGAAGAAGGTTTTTCGGATCGTAAACTTCTTTTAGCGGGGAGTAATCTT  
GAAAGTACCCGCTGAATAAGGACCGGCTAACTACGTGCCAGCAGCCGCGGTAATACGTAG  
GGTCCGAACGTTATCCGGAATTATTGGGCGTAAAGAGTTCGTAGGTGGTTTTGTAAGTTG  
GATATTAATCTATCGGCTTAACCGATAAACTGTATCGAATACTGCAAACTTTGTGGTT  
TGCAGGGGCAGATGGAATTCATGGTGTAGCAGTGGAATGCGTAGATACCATGAAGAACAC  
CAATGGCGAAGGCAGTCTGCTAGGCTTTCCAGACACTGAGGAACGAAAGCGTGGGTAGCG  
AACGGGATTAGAAACCCCGTAGTCC

>Otu27608

CCAGCCTATGGGGGGCAGCAGTGGGGAATCTTGCACAATGGGGGAAACCCTGATGCAGCG  
ACGCCGCGTGAGCGATGAAGCCCTTCAGGGTGTAAAGCTCTCTCGTCAGGGAAGATAGTG  
ACGGTACCTGGAGAAGCAGCTGCGGCTAACTACGTGCCAGCAGCCGCGGTAATGCGTAGG  
CAGCGAGCGTTGTTTCGGAGTTACTGGGCGTAAAGGGTGTGTAGGCGGTTGTTTAAGTTTG

GTGTGAAATCTCCCGGCTCAACTGGGAGGGTGCGCCGAATACTGAATGACTTCGAGTGCG  
GGAGAGGAAAGTGGAATTCCTGGTGTAGCGGTGAAATGCGTAGATATCAGGAGGAACACC  
GGTGGCGAAAGCGGCTTTCTGGACTGTTTCTGACACTCATATGCGAAAGCTAGGGTAGCA  
AACGGGATTAGAACCCCAAGTAGTCC

>Otu27625

CCAGCCTACGGGGGGCAGCAGGCGCGAAAACTTTACAATGCGGGAAACCGTGATAAGGGA  
ACCCCGAGTGCCCGTTAAATCGGGCTGTCCACCAGTTTAAATAACTGGTGAAGAAAGGGC  
CGGGCAAGACCGGTGCCAGCCGCCGCGGTAAACACCGGCGGCTCGAGTGGAACCGCTATT  
ATTGGGTCTAAAGGGTCTGTAGCCGGCTGACTAAGTCTCTTGGGAAATCTGGCAGCTCAA  
CTGTCAGGCTTTCAGGAGATACTGATCGGCTCGAGACCGGGAGAGGTGAGAGGTACCTCA  
GGGGTAGGGGTGAAATCTTGTAATCCTTGAGGGACCACCAGTGGCGAAGGCGTCTCACCA  
GAACGGATCTGACGGCAAGGGACGAAAGCTAGGGGCTCGAACCGGATTAGATACCCGCGT  
AGTCC

>Otu27628

CCAGCCTACGGGGGGCAGCAGTGGGGAATCTTCCGCAATGGACGAAAGTCTGACGGAGCG  
ACGCCGCATGAGTGAAGAAGGCCTTCGGGTCTGTAAAGCTCTGTCAATGGGGACGAACGAG  
CCGGTCAGGAAATGGGACGGCAGTGACGGTACCCATGAAGGAAGCCACGGCTAACTACGT  
GCCAGCAGCCGCGTAATACGTAGGTGGCGAGCGTTGTCCGGAATTATTGGGCGTAAAGC  
GCGCGCAGGCGGGAACATCAGTCTGTTGTGAAAACGCGGGGCTTAACCCCGTAGATGCGA  
TGGATACTGTGTTTCTTGAGTGCAGGAGAGGAAAGCGGAATTCCTCGTGTAGCGGTGAAA  
TGCGTAGAGATGGGGAGGAACACCAGTGGCGAAGGCGGCTTTCTGGACTGTGTCTGACGC  
TGAGGCGCGAAAGCTAGGGGAGCGAACGGGATTAGAAACCCGGGTAGTCC

>Otu27634

CCGCCTATGGGTGGCTACAGTCGAGGATCTTCGGCAATGTGCGCAAGCACGACCGAGCGA  
CGCCGCGTGTGCGACGAAGGCCTTCGGGTGTAAAGCACTGTTCGAGGGGGAGGAAGCCGC  
AAGGTTGACCTATCCCTGGAGGAAGCACGGGCTAAGTTTCGTGCCAGCAGCCGCGGTAAAG  
CGAACCGTGCTAACGTTGTTTCGGAATCACTGGGCTTAAAGGGCGCGTAGGCGGGTGACCA  
AGTCAGGGGTGAAATCCTTCGGCTTAACCGGAGAACAGCCTCTGATACTGGTTCGTCTGGA  
GTGAGGTAGGGGCATGCGGAACTTCGGGTGGAGCGGTGAAATGCGTAGATATCGGAAGGA  
ACACCGGTGGCGAAGGCGGCGTGCTGGACCTCAACTGACGCTGAGGCGCGAAAGCCAGGG  
GAGCAAACGGGATTAGAAACCCCTAGTAGTCC

>Otu27642

CCAGCCTATGGGGCGCTGCAGTGGGGAATTTTGGACAATGGGCGAAAGCCTGATCCAGCA  
ATGCCGCGTGTGTGAAGAAGGCCTTCGGGTGTAAAGCACTTTTGTGGGGAGGAAGGCG  
GTGTACGAATACTGTGCCGCTCTGACGTTACCCACAGAATAAGCACCGGCTAACTCCGTG  
CCAGCAGCCGCGTAATACGGGGGGTGCGAGCGTTAATCGGAATTACTGGGCGTAAAGCG  
TGCGTAGGCGGTTTCGGTCAGTCAGCCGTGAAAGCCCTGGGCTTAACCTGGGAACGGCGGT  
TGGGACGGTTCGACTGGAGTGGGCTAGAGGATCGTGGAATTCCTGGGTGAGCGGTGAAAT  
GCGTAGAGATCGGGAGGAACACCGATGGCGAAGGCAGCGGTCTGGGGCCACACTGACGCT  
GAGGCACGAAAGCGTGGGGAGCAAACAGGATTAGATACCCTCGTAGTCC

>Otu27648

CCAGCCTATGGGGGGCAGCAGTCGAGGATCTTCGGCAATGGGCGCAAGCCTGACCGAGCG  
ACGCCGCGTGTGCGATGAAGGCCTTCGGGTGTAAAGCACTGTTCGAGGGGGAGGAAGACC  
CGCAAGGGTTTGACCTATCCCTGGAGGAAGCACGGGCTAAGTTTCGTGCCAGCAGCCGCGG  
TAAGACGAACCGTGCAAACGTTGTTTCGGAATCACTGGGCTTAAAGGGCGCGTAGGCGGGT  
GATCAAGTCAGGGGTGAAATCCGGCAGCTTAACTGTGCAATAGCTTCTGATACTGGTTGT  
CTTGAGTGGGGTAGGGGCATGTGGAACCTTCGGGTGGAGCGGCGAAATGCGTAGATATCGG  
AAGGAACGCCGTGGCGAAAGCGACGTGCTGGACCTTTCTGACGCTGAGGCGCGAAAGC  
CAGGGGAGCAAACGGGATTAGATACCCTGGTAGTCC

>Otu27675

CCAGCCTATGGGATGCTCCAGTGAGGAATATTGGACAATGGGCGCAAGCCTGATCCAGCC  
ATGCCGCGTGGGTGATGAAGGCCCTAGGGTTGTAAAGCCCTTTTCGGCGGGGAAGATAATG  
ACGGTACCCGCGAGAATAAGCCCCGGCTAACTTCGTGCCAGCAGCCGCGGTAATACGAAGG  
GGGCTAGCGTTGCTCGGAATGACTGGGCGTAAAGGGCGCGTAGGCGGTTTGTACAGTCAG  
ATGTGAAATTCCTGGGCTCAACCTGGGGACTGCATTTGATACGTGCAGACTTGAGTGAAG  
AAGAGGGTCGTGGAATTTCCAGTGTAGAGGTGAAATTCGTAGATATTGGAAAGAACACCG  
GTGGCGAAGGCGGCGACCTGGTCTTTAACTGACGCTGAGGCGCGAAAGCGTGGGGAGCAA  
ACAGGATTAGATACCCCGGTAGTCC

>Otu27699

CCAGCCTATGGGGGGCAGCAGCGGGGAATATTGGACAATGGGCGCAAGCCTGATCCAGCA  
ATGCCGCGTGGGTGAAGAAGGTCTTCGGATTGTAAAGCCCTTTTGGCGGGGACGATGATG  
ACGGTACCGGAAGAATAAGCACCGGCTAACTACGTGCCAGCAGCCGCGGTAATACGTAGG  
GTGCAAGCGTTAATCGGAATTACTGGGCGTAAAGCGTGCGCAGGCGGTTTCGCTAAGACAG  
ATGTGAAATCCCCGGGCTTAACCTGGGAAGTGCATTTGTGACTGGCGGGCTAGAGTATGG  
CAGAGGGGGGTAGAATTCCACGTGTAGCAGTGAAATGCGTAGAGATGTGGAGGAATACCG  
ATGGCGAAGGCAGCCCCCTGGGCTAAGATTGACGCTCATGCACGAAAGCGTGGGGAGCAA  
ACAGGATTAGAAACCCCTGTAGTCC

>Otu27703

CCAGCCTACGGGGTGCTGCAGTCGAGAGGCTTTGTCAATGGGGGAAACCCTGAACAAGCG  
ACGCCGCGTGAGGGATGAAGGCCTTTGGGTGTAAACCTCTGTTGATAGGGAAGAAACGT  
CGGTGGGTGAATAATCCGCCGACCTGACGGTACCTGTTCGAGGAAGCTCCGGCTAACTCCG  
TGCCAGCAGCCGCGGTAATACGGGGGGAGCAAGCGTTGTTTCGGAATCACTGGGCGTAAAG  
GGCGCGTAGGCGGTTTTGGTAAGTGAGATGTGAAAGGCTCCGGCTCACCCGGAGAGATGCA  
TCTCATACTGTCAAGCTAGAGTGCAGCAGAGGAGACGAGAATTCCAGGTGTAGCGGTGAA  
ATGCGTAGATATCTGGAGGAATACCGGTGGCGAAGGCGCGTCTCTGGGCTGCTACTGACG  
CTGATGCGCGATAGCCAGGGGAGCAAACGGGATTAGAAACCCTCGTAGTCG

>Otu27705

CCAGCCTACGGGTTGCTGCAGTGGGGAATCTTGCGCAATGGACGAAAGTCTGACGCAGCA  
ACGCCGCGTGAGGGACGAAGGTTTTCTGAGTTGTAAACCTCTTTCGACAGGAACGATTGT  
GACGGTACCTGTAGAAGAAGCACCGGCCAACTATGTGCCAGCAGCCGCGGTGATACATAG  
GGTGCAAGCGTTATTCGGATTTATTGGGCGTAAAGAGCTCGTAGGCGGTTTCATCAAGTCG  
GGTGTTAAACCCCCAGGCTCAACCTGGGGCCGCCACCCGAAACTGATGTGACTAGAGTTT  
GGTAGGGGATCACGGAATTCCTGGTGTAGCGGTGAAATGCGCAGATATCGGGAGGAACAC  
CGGTGGCGAAGGCGGTTCTCTGGGCCTTACCTGACGCTGAGGCGCGACAGCGTGGGGATC  
AAACAGGATTAGAAACCCTAGTAGTCC

>Otu27707

CCAGCCTACGGGTCGCACCAGGCGCGCAAAACCTCACAATGCGCGTAAGCGTGATGAGGGG  
AATCTGAGCGATTCACTTCGGTGAATCTTTTGCCAAGTTTAGTCAGCTTGGCGAATAAGT  
GCTGGGCAAGACCGGTGGCAGCCGCCACGGTAATACCGGCAGCACAAAGTGGTGTCCACGA  
TTATTGGGCTTAAAGCGCTCGTAGCTGGCCGATACAGTCTCGTGTGAAATATTGGTGCTC  
AACATCAATGCGTGCACGAGATACCCATTGGCTAGGAAGCGGGTGAGGTTAGGAGTACTT  
ATGGGGAAGGGGTAAAATCCTATAATCCTATAAGGACTAACGGTGGCGAAGGCGCCTAAC  
TAGAACGCATTTCGACAGTGAGGAGCGAAGGCTAGGAGAACGAATCGGATTAGAAACCCCA  
GTAGTCC

>Otu27749

CCAGCCTACGGGTGGCAGCAGTAGGGAATCTTGCGCAATGGGCGAAAGCCTGACGCAGCA  
ACGCCGCGTGGGGGATGAATGCCTTCGGGTGTAAACTCCTTTTAGTGGGAACGAAATTG  
ACGGTACCCACAGAAAAAGCCCCGGCTAACTACGTGCCAGCAGCCGCGGTGATACGTAGG  
GGGCGAGCGTTGTCCGATTACTGGGCGTAAAGAGCTCGTAGGTGGCTGAGTAAGTCGG  
CGTGTTAAATCTCCAGGCTTAACCTGGAGTCGCACTCGATACTGCTCTAGCTAGAGTCCG  
GTAGGGGACCATGGAATTCCCTGGTGTAGCGGTGAAATGCGCAGATATCAGGAGGAACACC  
AGTAGCGAAGGCGGTCTCTGGATCGTTGCTGACGCTGAGACGCGAAAGCGTGGGGAGCA  
AACAGTATTAGATACCCGCGTAGTCC

>Otu27754

CCAGCCTATGGGAGGCTCCAGTAACGAATATTCCGCAATGCGCGAAAGCCTGACGGAGCA  
ACGCCGCGTGAGTGATGAAGGCCTTCGGGTGTAAAGCCCTGTTCGAGGGGAAGAAAAGC  
TTGCTGGCTAATATCCAGCAGGCCCTTGACGGTACCCTCAAAGGAAGCACCGGCTAACTC  
CGTGCCAGCAGCCGCGGTAAGACGGAGGGTGCAAGCGTTGTTTCGGATTGACTGGGCGTAA  
AGGGCGTGTAGGCGGTTGGTCAAGTCCGATGTGAAAGCCCGGGGCTTAGCCTCGGAAGTG  
CATCGGAAACTAGCCAGCTGGAGCGCGATAGAGGAGGGTAGAATTCCTGGTGTAGCGGTG  
AAATGCGTAGATATCAGGAGGAATACCGGCGGCGAAGGCGGCCCTCTGGATCGTTGCTGA  
CGCTGAGACGCGAAAGCGTGGGGAGCAAACAGGATTAGAGACCCGCGTAGTCC

>Otu27781

CCAGCCTACGGGGGGCAGCAGCAGTCAAGAATATTCTCAATGGCCGCAAGGCTGAAGGA  
GCGACGCCGCGTGATAGGATGAAGGTCTTCGGATCGTAAACTACTTTTATAAGGGAAGAA  
TTGTGACGGTACCTTATGAATAAGAGGTTGCTAACTCTGTGCCAGCAGCAGCGGTAATAC

AGAGACCTCAGGCGTTATCCGGATTTATTGGGCGTAAAGCGTCCGCAGGTGGTTTAGCCA  
GTCAGAGGTCAAAACTTTTTCGCTTAACGGAAAGATCGCCTTTGATACTACTAACTTGAG  
TATGGAAGAGGTGAGCGGAATTCTCGGTGTAGTCGTAATAAGCGTTGATATCGAGAAGAA  
CACCAAATGCGAAGGCAGCTCACTGGTACATTACTGACACTCATGGACGAAAGCGTGGG  
AGCAAACAGGATTAGAGACCCAGTAGTCC

>Otu27787

CCAGCCTATGGGGGGCAGCAGTAGGGAATATTGCGCAATGGGCGAAAGCCTGACGCAGCA  
ACGCCGCGTGGGGGATGAAGGCCTTCGGGTGTAAACTCCTTTTAGTGGGAACGAAATTG  
ACGGTACCCACAGAAAAAGCCCCGGCCAACTACGTGCCAGCAGCCGCGGTGATACGTAGG  
GGGCAAGCGTTGTCCGGATTTATTGGGCGTAAAGAGCTCGTAGGCGGCTTGGCAAGTCGA  
TTGTGAAACCTCCAGGCTTAACCTGGAGACGCCAGTCGATACTGCCATGGCTAGAGTCCG  
GTAGGGGACCATGGAATTCCTGGTGTAGCGGTGAAATGCGCAGATATCAGGAGGAACACC  
GGTGGCGAAGGCGGTGGTTTGGGCCGGAACGTACGCTGAGGAGCGAAAGCGTGGGGAGCA  
AACAGGATTAGATACCCCGGTAGTCC

>Otu27826

CCAGCCTATGGGGGGCTCCAGTGAGGAATATTGCACAATGGGGGCAACCCTGACGCAGCA  
ACGCCGCGTGAGTGAGGAAGGTTTTTCGGACCGTAAGCTCTGTTCGAGCGGAAGAAATGC  
CTGGAAGCTAATACTTTTCAGGCTTGACGGTACCGCTAAAGGAAGCACCGGCTAACTCCG  
TGCCAGCAGCCGCGTAATACGGGGGGTGCAGCGTTGTTTCGGAATCATTTGGGCGTAAAG  
AGCGTGTAGGCGGCTGGATAAGTCAGATGTGAAAGCCCTGGGCTTAACCCAGGAAGTGCA  
TTTGAAACTGTTTCAGCTGGAGTAAGGGAGAGAAAAGTGGAATTCCTGGTGTAGAGGTGAA  
ATTCGTAGATATCAGGAGGAGCACCGGTGGCGAAGGCGACTTTCTGGCCCTATACTGACG  
CTGAGACGCGAGAGCGTGGGTAGCAAACAGGATTAGAAACCCGCGTAGTCC

>Otu27884

CCAGCCTACGGGATGCTGCAGTGGGGAATTTTGGACAATGGGGGCAACCCTGATCCAGCC  
ATGCCGCGTGTGTGAAGAAGGCCTTCGGGTGTAAAGCACTTTTGTTCGGGAACGAAACGG  
CTTTTACTAATACTAGGAGCTAATGACGGTACCCGAAGAATAAGCACCGGCTAACTACGT  
GCCAGCAGCCGCGTAATACGTAGGGTGCAGCGTTAATCGGAATTACTGGGCGTAAAGC  
GTGCGCAGGCGGTTTTTGCAAGTCAGATGTGAAATCCCCGGGCTCAACCTGGGAACTGCAT  
TTGAAACTACAAGGCTAGAGTGTGTTCAGAGGGGGGTAGAATTCACGTGTAGCAGTGAAA  
TGCGTAGAGATGTGGAGGAATACCGATGGCGAAGGCAGCCCCCTGGACAAAGACTGACGC  
TCAGGTGCGAAAGCGTGGGGATCAAACAGGATTAGATACCTTGTAGTCC

>Otu27975

CCAGCCTACGGGATTGCAGCAGTGGGGAATATTGGACAATGGGCGAAAGCCTGATGGAGC  
GACGCCGCGTGGGGGATGGATGGCTTCGGCCCGTAAACCCCTGTCATTCGCGAACAATGC  
CTGCGGCTTAATACGTTGCAGGTTGATAGTAGCGGAAGAGGAAGGGACGGCTAACTCTGT  
GCCAGCAGCCGCGTAATACAGAGGTCCCAAGCGTTGTTTCGGATTTACTGGGCGTAAAGG  
GTGCGTAGGTGGTCGGGTAAAGTCTGATGTGAAATCTCCGAGCTTAACCTCGGAAATGGCAT  
TGGATACTATTTCGGCTTGAGGGTTGGAGGGGGGACTGGAATTCCTCGGTGTAGCAGTGAAA  
TGCGTAGATATCGAGAGGAACACCACTGGCGAAGGCGAGTCCCTGGACAACTCCTGACAC  
TAAGGCACGAAAGCTAGGGGAGCAAACAGGATTAGAAACCCCTGTAGTCC

>Otu28000

CCAGCCTATGGGTTGCACCAGGCGCGAAAACTCTGCAATGCGCGAAAGCGTGACAGGGGG  
AATCCAAGTGTTCTTGTACAACAGGAACCTTTGAGGGATGTAAAAAGTCCCTAGAATAAG  
GGGTGGGCAAGACTAGTGCCAGCCTCCGCGGTAACACTAGCATCCTCGAGTGGTACTCAT  
TTTTATTTGGCTTAAAGCGTCCGTAGTCGGACCGTTAAGTCTTCTGTGAAATCCTGCGGC  
TTAACCGTAGGGCTTGCAGAGGATACTGGCGGTCTTGGAGCCGGGAGAGGTTGGGGGTAT  
TCCTGGGGTAGCGGCGAAATGCTATAATCCTGGGAGGACCACCGATAGCGAAGGCACCCA  
ACTAGAACGGGCTCGACGATGAGGGACGAGAGCTAGGGGAGCAAACCGGATTAGATACCC  
TTGTAGTCC

>Otu28015

CCAGCCTATGGGGTGCTCCAGTAACGAGTATTGGGCAATGGGCGAAAGCCTGACCCAGCG  
ACGCCGCGTGTGGGATGAAGTCCTTCGGGATGTAAACCACTGTCAGGGACTACCAAGTGA  
CCGTTTCATAACATGGACGGGAGTTGAGGCGTCCCAGAGGAAGCCACGGCTAACTTCGTGC  
CAGCAGCCGCGGTAAGACGAAGGTGGCGAGCGTTGTTTCGGAATCATTTGGGCTTAAAGAGC  
ACGTAGGCGGCTTTTCAAGTGTCTTGTGAAATCCCTCGGCTCAACCGAGGAATTGCTGGG  
CATACTGTTAAGCTTGAGGCAGGTATGGGCGAGTGGAACCTTGGTGGAGCGGTGGAATG  
CGTAGATATCAAGAGGAACGCCGGTGGTGAAGACGATTTCGCTGGGCCTGTCCTGACGCTG

AGGTGCGAAAAGCCAGGGGAGCAAACAGGATTAGAAACCCCCGTAGTCC

>Otu28047

CCAGCCTACGGGGGGCTGCAGTGGGGAATATTGGACAATGGGCGCAAGCCTGATCCAGCC  
ATGCCGCGTGAGTGATGAAGGCCTTAGGGTTGTAAAGCTCTTACCCGGGATGATAATGAC  
AGTACCGGGGAGAATAAGCTCCGGCTAACTCCGTGCCAGCAGCCGCGGTAATACGGAGGGA  
GCTAGCGTTGTTTCGGAATTACTGGGCGTAAAGCGCACGTAGGCGGTGAGCCAAGTCAGAG  
GTGAAAGCCCCGAGCTCAACTTCGGAAGTGCCTTTGAAACTATCTGACTAGAATCTTGGA  
GAGGCGGGTGAATTCCGAGTGTAGAGGTGAAATTCGTAGATATTTCGGAAGAACACCAGT  
GGCGAAGGCGGCCCGCTGGACAAGTATTGACGCTGAGGTGCGAAAGCGTGGGGAGCAAAC  
AGGATTAGAAACCCCCGTAGTCC

>Otu28054

GGACTACGGGGGTTTCTAATCCTGTTTGCTCCCCACGCTTTCGCGCCTCAGCGTCAGTGT  
CGGTCCAGTGAGCCGCCTTCGCCACCGGTGTTCTTCCCAATATCTACGAATTTACCTCT  
ACACTGGGAATTCCACTCACCTCTCCCGAACTCAAGCTTAGCAGTATCAAAAGCAATTCC  
CAGGTTGAGCCCCGGGGCTTTCACCTTCTAACTTGCTATGCCGCCTACGCGCCCTTTACGCC  
CAGTAATTCCGAACAACGCTAGCCCCCTTCGTATTACCGCGGCTGCTGGCACGAAGTTAG  
CCGGGGCTTCTTCTCTGATTACCGTCATCATCGTCATCAGCGAAAGAGCTTTACAACCCT  
AAGGCCTTCATCACTCACGCGGCATTGCTGGATCAGGCTTTCGCCCATTGTCCAATATTC  
CCCACTGGTGCCCCCGTAGGCTGG

>Otu28064

CCAGCCTACGGGTTGCAGCAGTCGAGGATCTTTCGCAATGGGCGCAAGCCTGACGAAGCG  
ACGCCGTGTGAGTGAAGAAGGCCTTTGGGTGTAAACCGCCGTCGGAGTGGAGGAAATTC  
CAGGGGGTACTCCCCTTGGATTGACCTATACTCAGAGGAAGGACGGGCTAAGTTCGTGCC  
AACAGCCGCGGTAAGACGAACCGTCCAAACGTTATTTCGGATTCAGTGGGCTTAAAGGGTG  
CGTAGGCGGCTCAGAAAGTAGGGTGTGAAAGCCCTCGGCTCAACCGAGGAATTGCGCCCT  
AAACTACTGGGCTGGAGGAACGCAGAGGTAAGCGGAACCTTACGGTGGAGCGGTGAAATGC  
GTTGATATCGTAAGGAACACCAGGAGCGAAAGCGGCTTACTGGGCGTTTTCTGACGCTGA  
GGCACGAAAGCTAGGGGAGCGAACGGGATTAGATACCCCCGTAGTCC

>Otu28096

CCAGCCTACGGGAGGCAGCAGTAGGGAATATTGGGCAATGGGCGAAAGCCTGACCCAGCA  
ACGCCGCGTGACGAAGAAGGTCTTCGGATTGTAAACTCCTTTTGCCGGGGAAGAGTGAG  
GACGGTACCCGAGAATAAGTCACGGCTAACTACGTGCCAGCAGCCGCGGTAATACGTAG  
GTGACAAGCGTTATCCGGATTTATTGGGCGTAAAGCGCACGCAGGCGGCTGATTAAGTCT  
GACGTGAAATCTCTCGGCTTAACCGGGAGCGGTCGTTGGAACTAATCGGCTTGAGGCGA  
TGAGAGGGGTGTGGAATTCCCGGTGTAGTGGTGAATGCGTAGATATCGGGAGGAACATC  
AGTGGCGAAAGCGGCACCCTGGCATTGTGCTGACGCTCATGCGCGAAAGCGTGGGGAGCG  
AACGGGATTAGATACCCCTGTAGTCC

>Otu28144

CCAGCCTACGGGTCGCAGCAGTAGGGAATATTGGTAATCTGCGAAAGCGGGAACCAGCAA  
CGCCGCGTGTCGATGAAGGCCTTCGGGTCGTAAAGCACTTTTTGAGGGGACGAGGAAGG  
ACGGTACCCTCAGAATAAGTCTCGGCTAACTACGTGCCAGCAGCCGCGGTAACATGTAGG  
AGACGAGCGTTATCCGGATTTACTGGGCGTAAAGCGCATGCAGGCGGTTTGGAAGTTGG  
ATGTGAAAGCTCCCGGCTTAACCTGGGAGAGGTCGTTCAATACTTCCAGACTTGAGGATGT  
GAGAGGAAAGTGGAATTCCGAGTGTAGTGGTGAATGCGTAGATATTCGGAGGAACACCA  
GTGGCGAAAGCGGCTTTCTGGCACATTTCTGACGCTCATAACGAAAGCTAGGGGAGCGA  
ACGGGATTAGAAACCCCTCGTAGTCC

>Otu28145

CCAGCCTACGGGAGGCAGCAGGCGCGAAAACCTTTACAATGCGGGAAACCGTGATAAGGGA  
ACTCCGAGTGCCCGTTAAATCGGGCTGTCCACCAGTTTAAATAACTGGTGAAGTAAGGGC  
CGGGTAAGACGGGTGCCAGCCGCGCGGTAATACCCGCGGCCCGAGTGGTGGTCGATATT  
ATTGAGCCTAAAACGTTTCGTAGCCGCTTGTGTAATCCTTGGGTAAATCGGCCAGCTTAA  
CTGTCCGAAGTCCGGGGAGACTGCAAGACTTGGGATCGGGAGAGGTGAGAGGTACTTCTG  
GGGTAGGGGTAAAATCCTGTAATCCTAGAAGGACCACCGGTGGCGAAGGCGTCTGACTAG  
AACGAATTCGACGGTGAGGAACGAAGCCCTGGGGCGCAAACGGGATTAGAAACCCCTCGTA  
GTCC

>Otu28160

CCAGCCTACGGGATGCTGCAGTGGGGAATTTTGGACAATGGGGGAAACCCCTGATCCAGCA  
ATGCCGCGTGTTGAAGAAGGCCTTCGGGTGTAAAGCACTTTTGTCCGGAAGAAATCC

TTTGAGTTAATACCTCGGGGGGATGACGGTACCGGAAGAATAAGCCCCGGCTAACTTCGT  
GCCAGCAGCCGCGGTAATACGAAGGGGGCTAGCGTTGCTCGGAATCACTGGGCGTAAAGG  
GTGCGTAGGCGGGTCTTTAAGTCAGGGGTGAAATCCTGGAGCTCAACTCCAGAACTGCCT  
TTGATACTGAGGATCTTGAGTTCGGGAGAGGTGAGTGGAACGCGAGTGTAGAGGTGAAA  
TTCGTAGATATTCGCAAGAACACCAGTGGCGAAGGCGGCTCACTGGTCCGGTACTGACGC  
TGAGGTGCGAAAGCGTGGGGAGCAAACAGGATTAGAAACCCCTAGTAGTCC

>Otu28174

CCAGCCTATGGGTGGCTCCAGTCGAGAATTTTTTACAATGGACGAAAGTCTGATGCAGCA  
ACGCCGCGTGGGGGATGAAGCTTCTCGGAGTGTAACCCCTTTTCGACCCGGACGAATGCC  
CGCAAGGGTTTGACGGTACGGGTATAAGAAGCCCCGGCTAACTACGTGCCAGCAGCCGCG  
GTAATACGTAGGGGGCCAGCGTTGCTCGGAATTACTGGGCGTAAAGGGTTCGTAGGCGGT  
GCGGCAAGTTGGGAGTGAAATCTCTGGGCTCAACCCAGAGGCTGCTTCCAAAACCTGCTGT  
GCTTGAGTGTGAGAGAGGCTCGTGGAATTGCAGGTGTAGCGGTGAAATGCGTAGATATCT  
GCAGGAACACCCGCGGCGAAAGCGGCGAGCTGGATCACTACTGACGCTGAGGAACGAAAG  
CTAGGGGAGCAAACAGGATTAGAAACCCCGGTAGTCC

>Otu28179

CCAGCCTACGGGGTGCAGCAGTAACGGTATTATACCAATGTTGCGTGTATTTAATGATAC  
CGCGCGTTATGTTGACCAGGGCGGTGGCAAGCGTAAAGGGGCTTTTCGCCATATACCTTGA  
GCCATGGCATGCAGATGTTTTTGAATTTTTTGACCTTCGTAAAAACCATGGTAAAGAAGA  
AATGCGTGCCCGCGATTTGTTTTTTGCCCTTTGGGTATCTGACCTGTTTATGGAACGCGT  
AGAGGCCAATGAAGAGTGGAGTTTGTTCCTTGGCCGCACGAAGCACCCGGCCTTGCAGATTG  
CTGGGGCAAGGAATTTGAAGCCTTATATACTAAATACGAAAAAGAAGGCCGTGCCCCGAA  
GGTTATAAAAGCGCAGGAGCTATGGTTTTGCCATATTAGATACCCTAGTAGTCC

>Otu28192

CCAGCCTATGGGATGCAGCAGTGGGGAATTTTGGACAATGGGGGAAACCCTGATCCAGCA  
ATGCCGCGTGTGTGAAGAAGGCCTTCGGGTGTAAAGCACTTTTGTCCGGAAAGAAATCC  
TTTGAGTTAATACCTGGGGTGGATGACGGTACCGGAAGAATAAGCACCCGGCTAACTACGT  
GCCAGCAGCCGCGGTAATACGTAGGGTGCAAGCGTTAATCGGAATTACTGGGCGTAAAGC  
GCACGCAGGCGGCTCGATAAAATTAGAAGTGAAAGCCTTGGGCTTAACCTGAGAATTGCTT  
TTAAGACTGTGCGAGCTAGAATCCAGAAGAGGGTAGTGGAATTCAGAGTGTAGAGGTGAAA  
TTCGTAGATATTCGGAAGAACACCAGTGGCGAAGGCGACTACCTGGTCTGGCATTGGCGC  
TCATGTGCGAAAGCGTGGGGAGCAAACAGGATTAGAAACCCCTGGTAGTCC

>Otu28199

CCAGCCTACGGGTCGCTCCAGTGGGGAATATTGGACAATGGGCGAAAGCCTGATCCAGCA  
ATGCCGCGTGTGTGAAGAAGGTCTTCGGATTGTAAAGCACTTTTCGACGGGGACGATGATG  
ACGGTACCCGTAGAAGAAGCCCCGGCTAACTTCGTGCCAGCAGCCGCGGTAATACGAAGG  
GGGCTAGCGTTGCTCGGAATGACTGGGCGTAAAGGGCGCGTAGGCGGATTGTACAGTCAG  
ATGTGAAATTCTGGGCTTAACCTGGGGGCTGCATTTGATACGTATAGTCTTGAGTGAGG  
AAGGGGGTTGGGGAATTCCAGTGTAGAGGTGAAATTCGTAGATATTGGGAAGAACACCG  
GTGGCGGAGGCGGCAACCTGGACTGGTATTGACGCTGAGGCGCGAAAGCGTGGGGAGCAA  
ACAGGATTAGAAACCCGCGTAGTCC

>Otu28204

GGACTACTCGGGTATCTAATCCCGTTTTGCTCCCCTGGCTTTTCGTGTTTCAGAGTCAGGAA  
TCTTCCAGGTATCCGCCTTCGCCACCGGTGTTTCCTTATGATATCTACGCATTTCACTGCT  
ACACCATAAATTCCGATACCCCTCCGATCCTCTAGCAGAGCAGTATCAAGCGCAGTTTC  
AGAGTTAAGCTCTGAGATTTACACCTGACTTACCCTACCTCCTACACACCCTTTACGCC  
CAATGAATCCGAACAACGCTCGGGACCTCTGTCTTACCGCGGCTGCTGGCACAGAGTTAG  
CCGTCCCTTCTCTCCGCATACCATCAAATACGCCGGCTGTAACTGGCGTATCCTTGTT  
CTGCAGTGACAGGAGTTTACAATCCGAAAACCTTCATCCTCCACGCGGCGTCGCTCCATC  
AGGGTTTCCCCCATTTGTGAAAAATTCTCGACTGGTGCCCCCGTAGGCTGG

>Otu28209

CCAGCCTACGGGACGCAGCAGTGAGGAATATTGGTCAATGGACGCAAGTCTGAACCAGCC  
ATGCCGCGTGAAGGATGAAGGCCTTCTGGGTGTAAACTTCTTTTATGTGGGAAGAAACC  
TCTGATTTCTATTAGAGTTGACGGTACCATAGGAATAAGCACCCGGCTAACTCCGTGCCAG  
CAGCTGCGGTAATACGGAGGGTGCAAGCGTTATCCGGATTTACTGGGTTTAAAGGGTGTG  
TAGGCGGGCTATTAAGTCAGCGGTGAAATCTCCGGGCTCAACCTGGAAACTGCCATTGAT  
ACTATAGATCTTGAATTATCTGGAGGTAAAGCGGAATATGTCATGTAGCGGTGAAATGCTT  
AGATATGACATAGAACACCAATTGCGAAGGCAGCTTACTACGGATTGATTGACACTGAGG

CACGAAAGCGTGGGGATCAAAACAGGATTAGAAACCCCTGTAGTCC

>Otu28224

CCAGCCTACGGGAGGCTGCAGTGGGGAATATTGGGCAATGGGCGCAAGCCTGACCCAGCC  
ATGCCGCGTGAGTGATGAAGGCCTTCGGGTCGTAAAGCTCTGTGGGGAGAGAAGAATCGC  
CTTGTGGCTAACATCCACGAGGTCTGACGGTATCTCCTTAGCAAGCACCGGCTAACTCTG  
TGCCAGCAGCCGCGGTAATACAGAGGGTGCAAACGTTGCTCGGAATTATTGGGCGTAAAG  
CGCACGTAGGCGGTTTCGTTAAGTCAGATGTGAAAGCCCTGGGCTCAACCCAGGAAGTGCA  
TTTGAAACTGGCGAGCTTGAGTATGGAAGAGGGTCGCGGAATTCCCGGTGTAGAGGTGAA  
ATTCGTAGATATCGGGAGGAACACCAGTGGCGAAGGCGGCGACCTGGGCCAATACTGACG  
CTGAGGTGCGAAAGCGAGGGGAGCAAACGGGATTAGAGACCCCACTAGTCC

>Otu28239

CCAGCCTACGGGGCGCACCAGTCGAGAATTTTTCTCAATGGGCGAAAGCCTGAAGGAGCG  
ACGCCGCGTGGGGGATGAATGGCTTCGGCCCGTAAACCCCTGTCATTTGCGAACAAACCT  
TTTCACTTAACACGTGAAGAGCTGATTGTAGCGAAAGAGGAAGAGACGGCTAACTCTGTG  
CCAGCAGCCGCGGTAATACAGAGGTCTCAAGCGTTGTTTCGGATTCACTGGGCGTAAAGGG  
TGCGTAGGTGGCAGGGCAAGTCTGACGTGAAATCTCCGGGCTTAACCCGGAATGGCGTT  
GGAAACTGCCTTGCTCGAGGATTGGAGGGGAGACTGGAATACTTGGTGTAGCAGTGAAAT  
GCGTAGATATCAAGTGGAACACCAGTGGCGAAGGCGAGTCCCTGGACAACCTCTGACACT  
GAGGCACGAAAGCTAGGGGAGCAAACAGGATTAGATACCCTTGTAGTCC

>Otu28240

CCAGCCTACGGGTTGCACCAGTCGAGGATCTTCGGCAATGGGGGAAACCCTGACGCAGCA  
ACGCCGCGTGAGTGATGAAGGCCTTCGGGTCGTAAAGCTCTGTCAGAGGGAAAGAAGTGT  
GTGGTGGTTAATACCCATTATACTTGACGGTACCCTCAGAATAAGTCTCGGCTAACTACG  
TGCCAGCAGCCGCGGTAACACGTAGGAGACGAGCGTTATCCGGATTTACTGGGCGTAAAG  
CGCGTGCAGGCGGTTTGGTAAGTTGGATGTGAAAGCTCCCGGCTTAACCTGGGAGAGGTCTG  
TTCAATACTGCCAGACTAGAGGATGGTAGAGGGAGGTGGAATTCTGGGTGTAGTGGTGAA  
ATGCGTAGATATCCAGAGGAACACCAGTGGCGAAGGCGGCCTCCTGGACCATTTCTGACG  
CTCAGACGCGAAAGCTAGGGTAGCAAACGGGATTAGAGACCCTAGTAGTCC

>Otu28261

CCAGCCTACGGGTTGCTCCAGGCGCGAGAACTTTACAATGCACGAAAGTGTGATAAGGGG  
ATCCTGAGTGCTCATAACAGTATGGGCTTTTTTTAAGAGTAAATATCTTAAAGAATAAG  
TGTTGGGCAAGACTGGTGCCAGCCGCCGCGGTAACACCAGTGCCACGAGTGGCAATCGCG  
TATTTGGCCTTAAGCGTCCGTAGCTGGTTCTGTAAATCTTTTGTGAAATTGTTACTGTTA  
ACGTAGCACCGTGCGAAAGAGACTGCAGGACTTGAGACCGGGAGGAGTCAGAGGTATTCT  
TGGGGGAGCGGTAAAATGTTATAATCCCAAGAAGACCACCAGTGGCGAAGGCGTCTGACC  
AGAACGGATCTGACAGTGAGGGACGAATGCTAGGGGAGCGATCCGGATTAGATACCCAG  
TAGTCC

>Otu28277

CCAGCCTATGGGTGGCTGCAGTGGGGAATATTGGACAATAGGCGCAAGCCTGATCCAGCC  
ATGCCGCGTGAGTGATGAAGGCCCTAGGGTTGTAAAGCTCTTTTGTGCGGGAAGATAATG  
ACGGTACCGCAAGAATAAGCCCCGGCTAACTTCGTGCCAGCAGCCGCGGTAATACGAAGG  
GGGCTAGCGTTGCTCGGAATTACTGGGCGTAAAGGGCGCGTAGGCGGGCGTTTAAAGTCAG  
AGGTTAAATCCCAGGGCTCAACCCTGGAAGTGCCTTTGATACTGGGCACCTAGAGTTCGG  
GAGAGGTGTGTGGAAGTCCGAGTGTAGAGGTGAAATTCGTAGATATTCGGAAGAACACCA  
GTGGCGAAGGCGACACACTGGCCCGATACTGACGCTGAGGCGCGAAAGCGTGGGGAGCAA  
ACAGGATTAGAGACCCCCGTAGTCC

>Otu28292

CCAGCCTACGGGTCGCACCAGTTTCGAATCATTCACAATGGGCGAAAGCCTGATGGTGCG  
ACGCCGCGTGAGGGATGAAGGTCTTCGGATTGTAAACCTCTGTCACCGGGGAAGAAACGC  
TTTGAGTTAATAGTTCAAAGCCTGACTTAACCCGGAGAGGAAGCAGTGGCTAACTCTGTG  
CCAGCAGCCGCGGTAATACAGAGACTGCGAGCGTTATTTCGGATTCACTGGGCGTAAGGGT  
GCGCAGGCGGCCAAGTGTGTGAGGCGTGAAAGCCCGGGGCTCAACCCCGGAATTGCACCT  
CAAACCTACATGGATAGAGTACTGGAGAGGGTAACGGAATTCATGGTGTAGCAGTGAAATG  
CGTAGATATCATGAGGAACACCAGAGGCGAAGGCGGTTACCTGGACAGTTACTGACGCTC  
AGGCACGAAAGCGTGGGGAGCAAAGGGATTAGATACCCCTGTAGTCC

>Otu28297

CCAGCCTATGGGTTCGCACCAGTGGGGAATCTTGCGCAATGGGCGAAAGCCTGACGCAGCA  
ACGCCGCGTGGGGGATGAAGCTTTTCGGAGTGTAACCCCTTTTCGACCCGGAAGAATGCC



CGCAAGGGTTTGACGGTACGGGTATAAGAAGCCCCGGCTAACTACGTGCCAGCAGCCGCG  
GTAAAACGTAGGGGGGCCAGCGTTGCTCGGAATTATTGGGTTTAAAGGGTGCGTAGGCGGC  
CCTGTAAGTCAGTGGTGAAATACGGCAGCTCAACTGTGAGGTGCCATTGATACTGCAGG  
GCTTGAGTACAGACGAGGTAGGCGGAATTGACGGTGTAGCGGTGAAATGCTTAGATATCG  
TCAAGAACACCGATAGCGAAGGCAGCTTACTAGACTGTAAC TGACGCTGAGGCACGAAAG  
TGGGGGATCAAACAGGATTAGAAACCCCACTAGTCC

>Otu28304

CCAGCCTATGGGGCGCTGCAGTGGGGAATATTGGACAATGGGGGCAACCCTGATCCAGCA  
ATGCCGCGTGGGTGAAGACGGCCTGCGGGTTGTAAAGCCCTTTTGGCGGGGAAGAAAGCC  
CTGGGTTAAACAGACTCAGGGGGTGACGTTACCCGCTGAAGAAGCACCGGCCAACTCCGT  
GCCAGCAGCCGCGGTAATACGGAGGGTGCGAGCGTTAATCGGAATTACTGGGCGTAAAGG  
GCGCGTAGGCGGTTTGTCAAGTCAGTTGTGAAAGCCCCGGGCTCAACCTGGGAATGGCAA  
TTGAGACTGACCGACTGGAGTGTAAGAGAGGACCGTGGAATTCCTGGTGTAGCGGTGAAA  
TGCGTAGAGATCGGGAAGAACACCGATGGCGAAGGCAGCGGTCTGGGTTAACTGACGC  
TGAGGTGCGAAAGCGTGGGGAGCAAACAGGATTAGAAACCCCTGTAGTCC

>Otu28308

CCAGCCTATGGGGGGCAGCAGTGGGGAATTTTGC GCAATGGGCGAAAGCCTGACGCAGCA  
ACGCCGCGTGGAGGATGAAGTGCTCTGCATTGTAAACTCCTGTGCGCCGGGACGAATTG  
GCGGGGTGCTAATCAGCTCCGCCTTGACTGTACCGACAAAGGAAGCCCCGGCTAACTCCG  
TGCCAGCAGCCGCGGTAATACGGAGGGGGCAAGCGTTACTCGGAATTATTGGGCGTAAAG  
GGCGCGTAGGTGGTTCTGTGCGTCCGAGGTGAAATCCCCGGGCTTAACCCGGGACCTGCC  
TCCGATACGGCCGAACCTTGAGTCCGGGAGAGGGGAGCAGAATTCCTAGTGTAGCGGTGAA  
ATGCGTAGATATTGGGAGGAATACCAGTGGCGAAGGCGGCTCCCTGGACCGGTACTGACA  
CTGAGGCGCGAAAGCGTGGGTAGCAAACAGGATTAGAAACCCCGTAGTCC

>Otu28398

CCAGCCTATGGGTCGCAGCAGTGAGGAATATTGGGCAATGGGCGAAAGCCTGACCCAGCA  
ACGCCGCGTGGGCGATGAAGATCTGAGGATCGTAAAGCACTTTTGAGGGGACGAGGAAGG  
ACGGTACCCTCAGAATAAGTCTCGGCTAACTACGTGCCAGCAGCCGCGGTAACACGTAGG  
AGACGAGCGTTATCCGGATTTACTGGGCGTAAAGCGCGTGCAGGCGGTTTGGTAAGTTGG  
ATGTGAAAGCTCCCGGCTTAACCTGGGAGAGGTGCTTCAATACTGCCAGACTAGAGGATGG  
TAGAGGGAGGTGGAATTCCTGGGTGTAGTGGTGAAATGCGTAGATATCCAGAGGAACACCA  
GTGGCGAAAGCGGCCTCCTGGACCATTTCTGACGCTCAGACGCGAAAGCTAGGGTAGCAA  
ACGGGATTAGAAACCCGTGTAGTCC

>Otu28419

CCAGCTAGGGTGGCAGCAGTCGAGAATAATTCGCAATGGGCGAAATCCTGACGATGCGAC  
GCCGTGTGAACGATGAAGGCCTTCGGGTTGTAAAGTTCTGTCGCCTATGAACAAGGTGA  
ACCATGAATAATGGGGCAACTTGAGTGTAATAGGAAAGGAAGCACCGGCTAACTCCGTGC  
CAGCAGCTGCGGTAATACGGAGGGTGCAAGCGTTAGTCGGAATTACTGGGCGTAAAGGGT  
GCGTAGGCGGGGATGTAAGTCAGATGTGAAAAACCGAAGCTCAACTTCGGCAGTGCATCT  
GAAACTGCGTTTCTAGAGGGATAGCGGAGAAAACGGAATTCACGTGTAGCGGTGAAATG  
CGTAGATATGTGGAAGAACACCTGTGGCGAAAGCGGTTTTCTAGCTTACCCCTGACGCTG  
AGGCACGAAAGCAAGGGGAGCAAACAGGATTAGAGACCCCGTAGTCC

>Otu28426

CCAGCCTACGGGGGGCAGCAGTCGAGAATCTTTCGCAATGGGCGAAAGCCTGACGAAGCG  
ACGCCGTGTGAGCGAAGAAGGCCTTCGGGTTGTAAAGCTCTTTCGCTAGGGAACAAGAAA  
GAATGGTTAATAACCATTCGATTTGATGGTACTTGGTAAAGAAGCACCGGCCAACTACGT  
GCCAGCAGCCGCGGTGATACGTAGGGTGCAAGCGTTGTCCGGATTTATTGGGCGTAAAGA  
GCTCGTAGGCGGTTTGATTAGTCGGGTGTGAAACCTCCAGGCTCAACCTGGAGCCGCCAC  
TCGATACTGTCATGACTAGAAATTCGGTAGGGGACCACGGAATTCCTGGTGTAGCGGTGAA  
ATGCGCAGATATCAGGAGGAACACCAGCAGCGAAGGCGGTGGTCTGGGCCGACATTGACG  
CTGAGGAGCGAAAGCGTGGGGAGCGAACAGGATTAGAAACCCGTGTAGTCC

>Otu28445

CCAGCCTACGGGTGGCAGCAGGCGAGAATATTCGCAATGGACGCAAGTCTGACGGAGCG  
ACGCCGCGTGATGGATGAAGTGCTTCGGTACGTAAACATCTTTTATCGAGGAAGAACTAA  
TTGACGGTACTCGATGAATAAGGGGCTCCTAACTCTGTGCCAGCAGGAGCGGTAATACAG  
AGGCCCCGAGCGTTACCCGGAATCACTGGGCGTAAAGGGTGTCCAGGCGGCTTTATTAGT  
CTCTCGTAAAAATCTGCGGGCTCAACCTGCAGCGCGCGAGGGAAACGGTAAAGCTCGAGGG  
CGCGAGAGGTACAGGGAACCTCATGGTGGAGGGGTGAAATCCGTTGATATCATGGGGAAACA

CCAAAGGCGAAGGCACTGTACTGGCGCGTTCTGACGCTGAGACACGAAAGCGTGGGAAT  
CGAACGGGATTAGAAACCCCTCGTAGTCC

>Otu28527

CCAGCCTACGGGTCGCAGCAGTCGAGAATCTTTACAATGGGGGCAACCCTGATGGAGCG  
ACGCCGCGTGAGGATAAGGTCTTCGGATTGTAACTCCTGTCATGTGGGAGCAAGGCCT  
GTTGATTAACTCAACATGTTTGATAGTACCACAAGAGGAAGAGACGGCTAACTCTGTG  
CCAGCAGCCGCGGTAATACAGAGGTCTCAAGCGTTGTTTCGGAATCACTGGGCGTAAAGGG  
TGTGTAGGCGGCGTGTAAAGTCAGATGTGAAAGCCCGGGGCTCAACCTCGGAACCTGCATC  
CGATACTGGCATGCTAGAGAATTGGAGAGGAGTCTAGAATTCACGGTGTAGCAGTGAAAT  
GCGTAGATATCGTGAGGAATACCAAGTGCGAAGGCAGGACTCTGGACATTTTCTGACGCT  
GAGACACGAAGGCCAGGGGAGCAAACGGGATTAGAAACCCCCGTAGTCC

>Otu28584

CCAGCCTACGGGGGGCACCAGTGGGGAATATTGCGCAATGGGCGAAAGCCTGACGCAGCA  
ACGCCGCGTGGGGGATGAAGGTTCTCGGATTGTAAACCCCTTTTCGATCGGAACGAATCTC  
CTCTTGGTGAATAATCAGGAGGATTGACGGTACCGAGAGAAGAAGCCACGGCTAACTCTG  
TGCCAGCAGCCGCGGTAAGACAGAGGTGGCGAGCGTTGTTTCGGAATTTATTGGGCGTAAAG  
CGAACGCAGGCGGTTTGGTAAGTCAGAGGTGAAAGCCACAGCTTAACCTGTGGCACTGCC  
TTTGATACTGCCCTTTCTTGAGTGCATGAGGGGGAAGCGGAATTCCGAGTGTAGAGGTGAA  
ATTCGTAGATATTCGGAAGAACACCAGTGCGGAAGGCGGCCCGCTGGACAGGTATTGACG  
CTGAGGTGCGAAAGCGTGGGGAGCAAACAGGATTAGAAACCCGTGTAGTCC

>Otu28589

CCAGCCTATGGGGGGCAGCAGTCGAGAATAATTCACAATGGGGGCAACCCTGATGGTGCA  
ACGCCGCGTGAGGATGACGGTCTTCGGATTGTAACTCCTGTCATCCGGGAGTAAGACC  
TGGCGATGAATAGTCGACAGGGTTGATAGTACCGGAAGAGGAAGGGACGGCTAACTTCGT  
GCCAGCAGCCGCGGTAATACGAAGGTCCCGAGCGTTGTTTCGGAATCACTGGGCATAAAGG  
GTGCGTAGGCGGTCCGGTAAGTCGGGTGTGAAATCCCGGGGCTCAACCCCGGAACCTGCAC  
TCGATACTGCCGGGCTAGAGGACTGGAGAGGAGACTGGAATTCTCGGTGTAGCAGTGAAA  
TGCGTAGATATCGAGAGGAACACTCGTGCGGAAGGCGAGTCTCTGGACAGTTCTGACGCT  
TGAGGCACGAAGGCCAGGGGAGCGAAAGGGATTAGAGACCCCTGTAGTCC

>Otu28617

CCAGCCTACGGGGTGCTCCAGTAGGGAATATTGCTCAATGGGCGAAAGCCTGAAGCAGCA  
ACGCCGCGTGACGAAGAAGGTCTTCGGATCGTAAAGTGCTTTTCTGGGAGATGAGAAAG  
GACAGTATCCAGGAATAAGTCTCGGCTAACTACGTGCCAGCAGCCGCGGTAACACGTAG  
GAGGCAAGCGTTATCCGGATTTACTGGGCGTAAAGCGTGTGCAGGCGGTTCCGGTAAGTTG  
GAGGTGAAAGCTCCCGGCTCAACTGGGAGAGGTCGTTCAATACTACCAGACTTGAGAGCA  
GTAGAGGGAGGTGGAATTCCCGGTGTAGTGGTGAAATGCGTAGACATCGGGAGGAACACC  
AGTGCGCAAAGCGGCCTCTGGACTGTTTCTGACACTCAGACGCGAAAGCTAGGGTAGCA  
AACGGGATTAGATACCCTTGTAGTCC

>Otu28623

CCAGCCTACGGGGGGCAGCAGTGAGGAATATTGGGCAATGCCCCGAAGGGTGACCCAGCA  
ACGCCGCGTGAGGATGAATGTCGTAAGATTGTAACTCCTGTTAGAGGGGAAGAATAGT  
CAGGTTTGTAGCCTGATTTGACTGTACCCTCAGAGAAAGCCCCGGCTAACTACGTGCCAG  
CAGCCGCGGTAATACGTAGGGGGCAAGCGTTGTCCGGATTTACTGGGTGTAAAGGGCGCG  
TAGGCGGGTTTGTAAAGTCAGAGGTGAAATCCTACAGCTTAACCTGTAGAACTGCCTTTGAT  
ACTGCAAATCTTGAGTTCAGAAGAGAGAGATGGAATTCCAGGTGTAGTGGTGAAATACGT  
AGATATCTGGAAGAACACCAGTTGCGAAGGCGATCTCTTGGTCTGACACTGACGCTGAGG  
CGCGAAAGCGTGGGGAGCAAACAGGATTAGATACCCCCGTAGTCC

>Otu28631

CCAGCCTACGGGCTCCAGCTAAGAATATTCCGCAATGGGAGCAATCCTGACGGAGCGACG  
CCGCGTGGAAGATGAAGGCCGAAAGGTTGTAAATTCCTTTTATACGGGAAGAATAAGGTT  
AAGAAGAGAATGCTTAATCGATGACGGTACCGTATGAATAAGCCCCGGCTAACTACGTGC  
CAGCAGCCGCGGTAATACGTAGGGGGCAAGCGTTGTTTCGGATTTACTGGGCGTAAAGGGC  
ATATAGGCTGTTATGTAAGTGTGGATTTAAAGGCGGAGGCTTAACCTCTAGTTTGGTCTG  
CAAACCTGCGTAGCTTGAGTGTAGAAGGGGAACTGGAATTCCGCGTGTAGGGGTGAAATC  
TATAGATATGCGGAAGAATACCTGTGGCGAAGGCGAGTTTCTGGTCTATAACTGACGCTG  
AAATGCGAAAGTGTGGGTAGCAAACAGGATTAGAAACCCGAGTAGTCC

>Otu28658

CCAGCCTATGGGGTGCTGCAGTGGGGAATATTGCGCAATGGGCGAAAGCCTGACGCAGCA

ACGCCGCGTGGGGGATGAAGGTTCTCGGATTGTAAACCCCTTTTCGATCGGAACGAATCCC  
CCCCCGGTAAATAATCGGGGGGATCGACGGTACCGAGAGAAGAAGCCACGGCTAACTCTG  
TGCCAGCAGCCGCGGTAAGACAGAGGTGGCGAGCGTTGTTTCGGATTTATTGGGCGTAAAG  
CGTGTGCAGGCGGTTTCGGTAAGTTGGATGTGAAAGCTCCCGGCTCAACTGGGAGAGGTCTG  
TTCAATACTGCTGGACTTGAGGATGGTAGAGGGAGGTGGAATTCCGGGTGTAGTGGTGAA  
ATGCGTAGATATCCGGAGGAACACCAGTGGCGAAAGCGGCCTCCTGGACCATTTCTGACG  
CTCAGACACGAAAGCTAGGGGAGCAAACGGGATTAGATAACCCGAGTAGTCC

>Otu28659

CCAGCCTATGGGAGGCAGCAGTTGGGAATCTTGCACAATGGGGGAAACCCCTGATGCAGCG  
ACGCCGCGTGGAGGACGAAGGGTCTAGGCTCGTAAACTCCTTTTTTCGGGAAAGACTTAG  
GACGGTACCCGAAGAATAAGCACCGGCTAATTACGTGCCAGCAGCCGCGGTAAGACGTAG  
GGTGCAAGCGTTGTCCGGATTTACTGGGCGTAAAGAGCGCGTAGGCGGCTCGTTAAGTGT  
GAAGTGAAATCTCTGGGCTCACCCAGAACTGCTTTACATACTGGCGAGCTAGAGGGTCT  
GGAGAGGTTTGTGGAATTCTTGGTGTAGCGGTGAAATGCGTTGATATCAGGAGGAACACC  
CATGGCGAAGGCAGCAAACCTGGCCGACTCCTGACGCTGAGGCGCGAAAGCGTGGGTAGCA  
AACAGGATTAGAGACCCCCGTAGTCC

>Otu28700

CCAGCCTACGGGTGGCAGCAGTGGGAATCTTGCACAATGGGCGAAAGCCTGACGCAGCA  
ACGCCGCGTGCGGGATGAAGGCTCTCGGGTCGTAAACCGCTTTTCAGCAGGGACGAAAATG  
ACGGTACCTGCAGAAGAAGCCCCGGCTAAATACGTGCCAGCAGCCGCGGTAATACGTATG  
GGGCAAGCGTTATCCGGATTCATTGGGCGTAAAGCGCGCGTAGGTGGCTTGTTAAGCGAG  
ATGTGAAAACCGGGGGCTTAACCCGCGGCCTGCATCTCGAACTGGCAGGCTTGAGTCTGG  
TAGAGGAAAGTGGAATTCACAGTGTAGCGGTGAAATGCGCAGATATTGGGAGGAACACCA  
GTGGCGAAGGCGGCTTTCTGGGCCACGACTGACACTGAGGCGCGAAAGCTAGGGTAGCAA  
ACGGGATTAGAAACCCCTTGTAAGTCC

>Otu28708

CCAGCCTATGGGGTGCACCAGTCAAGAATATTCCTCAATGGCCGAAAGGCTGAAGGAGCG  
ACGCCGCGTGTAGGATGAAGGTCTTCGGATTGTAAACTACTTTTACTAGGGAAGAATTTG  
TGACGGTACCTGGTGAATAAGAGGTTGCTAACTCTGTGCCAGCAGCAGCGGTAATACAGA  
GACCTCAAGCGTTATCCGGATTTATTGGGCGTAAAGCGTCCGCAGGTGGTTTTAGTAAGTC  
AGGGGTTAAAACCTTATCGCTTAACGATAAGACCGCCTTTGATACTGCTAGACTCGAGTAT  
GGAAGAGGTAAGCGGAATTCTCGGTGTAGTCGTAATAAGCGTTGATATCGAGAAGAACAC  
CAAATGCGAAGGCAGCTTACTAGTACATTACTGACACTCAGGGACGAAAGCGTGGGGAGC  
AAACAGGATTAGATAACCCCCGTAGTCG

>Otu28714

CCAGCCTATGGGACGCACCAGCTAAGAATCTTCCGCAATGGGCGAAAGCCTGACGGAGCG  
ATGCCACGTGATCGATGAAGGTCGAGAGATTGTAAAGACCTTTTACAGTTGAGGAATAAG  
TCTGGGAGGGAATGCCCGGATGATGACGTTAGACTGTGAATAAGCCCCGGCTAATTACGT  
GCCAGCAGCCGCGGTAACACGTAAGGGGCGAGCGTTGTTTCGGAATTATTGGGCGTAAAGG  
GCACGCAGGCGGTTATGCAAGTCTGGTGTGAAATCTCTGGGCTTAACTCAGAAGACGCGC  
TGGAACCTGCATGACTAGAATCTTAGAGGGGGAGTCGGAATTCCTAGTGTAGGGGTGAAA  
TCTGTTGATATTAGGAAGAACACCGGTGGCGAAGGCGGACTCCTGGCTGTAGATTGACGC  
TGAGGTGCGAAAGCATAGGGAGCAAACAGGATTAGATAACCTCGTAGTCC

>Otu28721

CCAGCCTACGGGATGCTCCAGCAAGGAATTTTCGTCAATGGGCGCAAGCCTGAACGAGCA  
ACGCCGCGTGCGGGATGACGGCCTTCGGGTGTAAACCGCTTTTTAGGGGGACGATGATG  
ACGGTACCCCTGGAAGAAGCCCCGGCTAACTCTGTGCCAGCAGCCGCGGTAAGACAGAGG  
GCGCAAGCGTTGTCCGGAATTACTGGGCGTACAGCGCACGCAGGTGGCCTGGCAAGTGTG  
GTGTGAAAGCCCCGCGCTTAACGCGGGGAGGCCAGCACAGACTGCCAAGCTCGAGGGATG  
CAGAGGGTGGTGGAATTGCCGGTGTAGTGGTGAAATGCGTAGAGATCGGCAGGAACACCA  
AGGACGAAGGTAGCCACCTGGGCATCACCTGACACTCATGTGCGACAGCGTGGGGAGCCA  
ACCGGATTAGAAACCCGTGTAGTCC

>Otu28726

CCAGCCTACGGGTCGCAGCAGTAACGAATATTCGCAATGCGCGAAAGCGTGACGGAGCA  
ATGCCGCGTGCAGGATGAAGCGGTTTCGCCGTGTAAACTGCTGTGAGGGGCGAGAAATAC  
TGATCAGCCCCAGAGGAAGGACCGGCTAAACTCGTGCCAGCAGCCGCGGTAAGACGAGTG  
GTCCAAGCGTTAGTCGGAATTACTGGGCTTAAAGGGTGCGTAGGCTGACTCGTAAGTGCC  
TTGTGAAAGCCCCCGGCTCAACCGGGGAACTGCAGGGCATACTGCGAGTCTTGAGGTAAC

TAGAGGCGGGCAGAACGATAGGTGGAGCGGTGGAATGCGTAGAGATCTATCGGAATGCCG  
AAGGTGAAGACAGCCCGCTGGGGTTTACCTGACGCTGAGGCACGAAAGCGTGGGGAGCAA  
ACAGGATTAGAAACCCGGGTAGTCC

>Otu28751

CCAGCCTATGGGGGCACCAGTTAGGAATTTTGC GCAATGGACGAAAGTCTGACGCAGCGA  
CACC GCGTGGAGGATGAAGACCCTAGGGTTGTAAACTCCTTTTACGCGCCATGAAGGCC  
ACTAGAATAAGTAGCTACTAACTACGTGCCAGCAGTCGCGGTAATACGTAGGCTACAAGC  
GTTACTCGGATTTATTGGGCGTAAAGGGTCTGTAGACGGTTTTTTAAGTCTTGTTTCAA  
GACCTCGACTTAATCGAGGAAAGGGGCAAGATACTGGAAGACTAGAGTGGTATCGGGGTT  
ACTGGAATTTTGTAGTGTAGGGGTTAAATCCGTGGATACTAAAAAGAACACCAAGCGCGAA  
GGCGGGTAAGTACATACTGACGTTTACAGAGACGAAAGCTAGGGTAGCAAACAGGATT  
AGAAACCCCGTAGTCC

>Otu28760

CCAGCCTACGGGGGCCTGCAGTGGGGAATATTGGACAATGGGCGCAAGCCTGATCCAGCC  
ATGCCGCGTGAGTGATGACGGCCCTAGGGTTGTAAAGCTCTTTCACCCACGACGATAATG  
ACGGTAGTGGGAGAAGAAGCCCCGGCTAACTTCGTGCCAGCAGCCGCGGTAATACGAAGG  
GGGCTAGCGTTGTTTCGGAATTACTGGGCGTAAAGGGCGCGTAGGCGGCCGATTAAAGTTAG  
GCGTGAAAGCCCCGGGGCTCAACTCCGGAATTGCGCTTGATACTGGTTGGCTTGAGTACGG  
GAGAGGATAGTGAATTCCAGTGTAGAGGTGAAATTCGTAGATATTGGGAAGAACACCA  
GTGGCGAAGGCGGCTATCTGGACCGTAAGTACGCTGAGGCGCGAAAGCGTGGGGAGCAA  
ACAGGATTAGAAACCCCTAGTAGTCC

>Otu28782

CCAGCCTATGGGTGGCTGCAGTCGAGAATTTTCTCAATGGGCGAAAGCTTGAAGGAGCG  
ACGCCGCGTGGGGGATGAAGGGCTTCGGCTCGTAAACCCCTGTCATTTGCGAACAAACCT  
TACGATTTAATAGATCGTGAGCTGATTGTAGCGAAAGAGGAAGGGACGGCTAACTCTGTG  
CCAGCAGCCGCGGTAATACAGAGGTCCCAGCGTTGTTTCGGATTCACTGGGCGTAAAGGG  
TGCGTAGGTGGCAAGGTAAGTTTGATGTGAAATCTCCGGGCTTAACCCGAAACTGCATT  
GAATACTCTCTTGCTTGAGGATTGGAGGGGGGACTGGAATACTTGGTGTAGCAGTGAAAT  
GCGTAGATATCAAGTGGAACACCAGTGGCGAAGGCGAGTCCCTGGACAATAACTGACGCT  
GAGGCGCGAAAGTGTGGGTAGCAAACAGGATTAGAAACCCCTGTAGTCC

>Otu28790

CCAGCCTATGGGTGGCAGCAGTCGAGAATTTTCTCAATGGGGGAAACCCGGAAGGAGCG  
ACGCCGCGTGGAGGATGAAGGTCTTCGGATTGTAAACTCCTGTCATTTGGGGAACAAGGTG  
CAAGTGTTAACTGCGCTTGCAATTGATAGTACCTGAAGAGGAAGAGACGGCTAACTCTGTG  
CCAGCAGCCGCGGTAATACAGAGGTCTCAAGCGTTGTTTCGGATTCACTGGGCGTAAAGGG  
TGCGTAGGTGGCGCCGTAAGTCAGGTGTGAAATCTCGGGGCTCAACCCGAAACTGCACT  
TGATACTGCGGTGCTTGAGTACTGGAGAGGAGATTGGAATTTACGGTGTAGCAGTGAAAT  
GCGTAGATATCAAGTGGAACACCAGTGGCGAAGGCGAGTCTCTGGACATTTCTCTGACGCT  
GAGGCACGAAAGCCAGGGGAGCAAACGGGATTAGATACCCTAGTAGTCC

>Otu28812

CCAGCCTATGGGTGCGCAGCAGTCGAGAATTTTTCACAATGGGCGAAAGCCTGATGGAGCG  
ACGCCGCGTGGGGGATGAATGGCTTCGGCCCGTAAACCCCTGTCATTTGCGAACAAACCT  
TTGTACTTAATACGTACAGAGCTGATTGTAGCGGAAGAGGAAGGGACGGCTAACTCTGTG  
CCAGCAGCCGCGGTAATACAGAGGTCCCAAGCGTTGTTTCGGATTCACTGGGCGTAAAGGG  
TGCGTAGGCGGTGCGGTAAGTCTGATGTGAAAGCTCGAAGCTTAAGTTCGAAATGGCATT  
GGATACTATTTCGGCTTGAGGAATGGAGGGGAGACTGGAATGCTCGGTGTAGCAGTGAAAT  
GCGTAGATATCGAGCGGAACACCAGTGGCGAAGGCGAGTCTCTGGACATTTCTCTGACGCT  
CATACGCGAAAGCTAGGGTAGCAAACGGGATTAGAGACCCGAGTAGTCC

>Otu28823

CCAGCCTACGGGTGGCAGCAGTAAGGAATATTGGACAATGCTCGCAAGAGTGATCCAGCC  
ATGCCGCGTGAGGAAGACGGCCCTATGGGTGTAAACTGCTTTTGAAGTAGAGAAAACC  
CTCCTACGTGTAGGAGGCTGATAGTATAGTTAGAATAAGCATCGGCTAACTACGTGCCAG  
CAGCCGCGGTAACACGTAGGAGGCAAGCGTTATCCGGATTTACTGGGCGTAAAGCGCATG  
CAGGTGGTTTCGGTAAGTTGGATGTGAAAGCTCCTGGCTCAACTGGGAGAGGTGCTTCAAT  
ACTACCGGACTTGAGAGCAGTAGAGGAAGGTGGAATTTCCCGGTGTAGTGGTGAAATGCGT  
AGATATCGGGAGGAACACCAGTGGCGAAAGCGGCCTTCTGGACTGTTTCTGACACTCATA  
TGCGAAAGCTAGGGTAGCAAACGGGATTAGATACCCTTGTAGTCC

>Otu28840

CCAGCCTATGGGGGGCACCAGTGGGGAATATTGGACAATGGGGGAAACCCTGATCCAGCA  
ATGCCGCGTGAGTGATGAAGGCCTTAGGGTTGTAAAGCTCTTTCGCCCCGCGACGATGATG  
ACGGTAGCGGGAGAAGAAGCCCCGGCTAATTTTCGTGCCAGCAGCCGCGGTAATACGAAAG  
GGGCTAGCGTTGTTTCGGAATTACTGGGCGTAAAGCGCACGTAGGCGGCTTGCGCAAGTGAG  
GCGTGAAAGTCCTGGGCTCAACCTGGGGACTGCGCTTCAGACTGCCTCGCTCGAGTCCGG  
AAGAGGGTGGTGGAATTCGAGTGTAGAGGTGAAATTCGTAGATATTTCGGAAGAACACCA  
GTGGCGAAGGCGGCTCACTGGCCCGGTACTGACGCTGAGGTGCGAAAGCGTGGGGAGCAA  
ACAGGATTAGATACCCTTGTAGTCC

>Otu28903

CCAGCCTACGGGGGGCTCCAGTCGAGAATTTTTTCAACAATGGGCGTGAGCCTGATGGAGCG  
ACGCCGCGTGGGGGATGAATGGCTTCGGCCCGTAAACCCCTGTCATTCGCGATCAAACCT  
GGCTATTTTAAAAGATGGCCAGCTGATAGTAGCGGAAGAGGAAGGGACGGCTAACTCTGTG  
CCAGCAGCCGCGGTAATACAGAGGTCCCAAGCGTTGTTTCGGATTCACTGGGCGTAAAGGG  
TGCGTAGGTGGTGGGGTAAGTCGGATGTGAAAGCTCGGAGCTCAACTCCGAAATTGCATT  
GGAAACTGCCCTGCTTGAGGGTCGGAGGGGGGACTGGAATTCTCGGTGTAGCAGTGAAAT  
GCGTAGATATCGAGTGGAACACCAGTGGCGAAGGCGAGTCTCTGGACATTTCTTGACGCT  
GAGGCACGAAAGCCAGGGGAGCAAACGGGATTAGAAACCCGTGTAGTCC

>Otu28908

CCAGCCTATGGGATGCTCCAGCTAAGAATCTTCCGCAATGGGCGAAAGCCTGACGGAGCG  
ATGCCGCGTGATCGATGAAGGTCGAGAGATTGTAAAGATCTTTTCCACATGAGGAATAAC  
CATCGGAGGGAATGCCGGTGGGATGACGTCAGTGTGGGAATAAGCCCCGGCTAATTACGT  
GCCAGCAGCCGCGGTAATACGAAGGGGGCTAGCGTTGTTTCGGATTTACTGGGCGTAAAGC  
GCACGTAGGCGGATCTTTAAGTCAGGGGTGAAATGCCGAGGCTCAACTTCGGAAGTGCCT  
TTGATACTGGAGATCTTGAGTTCGGGAGAGGTGAGTGGAAGTGCAGGTGTAGAGGTGAAA  
TTCGTAGATATTCGCAAGAACACCAGCGGCGAAGGCGGCTCACTGGCCCGATACTGACGC  
TGAGGTGCGAAAGCGTGGGGAGCAAACAGGATTAGAGACCCCGTAGTCC

>Otu28930

CCAGCCTATGGGTCGCTGCAGTGGGGAATATTGCGCAATGGACGAAAGTCTGACGCAGCA  
ACGCCGCGTGAGTGAAGAAGGCCTTCGGGTGTAAAGCTCTTTCGGCTGGGAAGAAGGGT  
GTAAAGGTTAATAATCTTTGCATTTGATGGTACCCGAAGAAGAAGCACCGGCAAACCTTCG  
TGCCAGCAGCCGCGGTAATACGAAGGGTGCGAGCGTTGTTTCGGAATTATTGGGCGTAAAG  
GGTTCGTAGGCGGGATTGTAAGTCAAGTGTGAAATCCCCGAGCTTAAGTTCGGGACGTGCA  
TTTGAAACTGTGATTCTTGAGTCATTGAGAGGGTGGTGGAATTGTTGGTGTAGGAGTGAC  
ATCCGTAGAGATCAGCAGGAACACCGGAGGCGAAGGCGACCACCTGGCCGAATACTGACG  
CTGAGGAACGAAAGCGTGGGGAGCAAACAGGGTTAGAAACCCAGTAGTCC

>Otu28931

CCAGCCTACGGGTGGCTGCAGTGGGGAATTTTGGACAATGGGGGCAACCCTGATCCAGCA  
ATGCCGCGTGTTGTGAAGAAGGCCTTCGGGTGTAAAGCACTTTTGTGAGGAACGAAGCGG  
ATTGGGCTAATACCCGATCTAATGACGGTACCTGAAGAATAAGCACCGGCTAACTACGT  
GCCAGCAGCCGCGGTAATACGTAGGGTGCAAGCGTTAATCGGAATTACTGGGCGTAAAGC  
GTGCGCAGGCGGTTATGTAAGACAGATGTGAAATGCCCGGGCTTAACCTGGGAAGTGCAT  
TTGTGACTGCATGGCTAGAATCTAGCAGAGGGGGGTAGAATTCCACGTGTAGCAGTGAAA  
TGCGTAGATATCGGAAGGAACACCAGTGGCGAAAGCGACTTCCTGGTTCGAATACTGGCGT  
TCATGTGCGAAAGCGTGGGGAGCAAACAGGATTAGAGACCCAGTAGTCC

>Otu28932

CCAGCCTACGGGGTGCAGCAGTCGAGGATCTTTCGGCAATGGGCGCAAGCCTGACCGAGCG  
ACGCCGCGTGTCGATGAAGGCCTTCGGGTGTAAAGCACTGTGAGGGGGAGAAAGCCG  
TAAGGTTGATCGACCCCTGGAGGAAGCACGGGCTAAGTTCGTGCCAGCAGCCGCGGTAAG  
ACGAACCGTGCGAACGTTATTCGGAATCACTGGGCTTAAAGGGCGCGTAGGCGGGCAATC  
AAGTCAGAGGTGAAATCCTGCGGCTTAACCGTAGAAGAGCCCCCTGATACTGATTGTCTCG  
AGGGAGGTAGGGCATGTGGAACCTCCGGTGGAGCGGTGAAATGCGTAGATATCGGAAGGA  
ACGCCGGTGGCGAAAGCGACGTGCTGGACCTCTACTGACGCTGAGGCGCGAAAGCCAGGG  
GAGCAAACGGGATTAGAGACCCCGTAGTCC

>Otu28940

CCAGCCTATGGGTGGCTGCAGTAGGGAATTTTCCACAATGGGCGAAAGCCTGATGGAGCA  
ACGCCGCGTGCAAGGATGAATGCCTTCGGGTGTAAAGTACTTTTATATGTGAAGATTATG  
ACGGTAACATATGAATAAGGATCGGCTAACTCCGTGCCAGCAGCCGCGGTCATACGGAGG  
ATCCAAGCGTTATCCGGAATTACTGGGCGTAAAGAGTTGCGTAGGTGGCAGAGTAAGTAG

ATAGTGAAAGCGTTTCGGCTCAACCGAATATCCATTATCTAAACTGCTCAGCTAGAGTACG  
AGAGAGGTAGATGGAATTTCTAGTGTAGGAGTGAAATCCGTAGATATTAGAAGGAACACC  
GATGGCGTAGGCAGTCTACTGGCTCGTTTCTGACACTAAGGCACGAAAGCGTGGGGAGCG  
AACGGGATTAGAAACCCGGGTAGTCC

>Otu28944

CCAGCCTACGGGGGGCAGCAGTGGGGAATATTGGACAATGGGCGCAAGCCTGATCCAGCC  
ATGCCGCGTGAGTGATGACGGCCTTAGGGTTGTAAAGCTCTTTCACACGCGAGGATAATG  
ACGGTAGCGTGAGAAGAAGCCCCGGCTAACTTCGTGCCAGCAGCCGCGGTAATACGAAGG  
GGGCTAGCGTTGTTTCGAATCACTGGGCGTAAAGCGCACGTAGGCGGATTTTTTAAGTCAG  
AGGTGAAAGCCTGGAGCTCAACTCCAGAACTGCCTTTGATACTGGAAGTCTTGAGTCCGG  
TAGAGGTGAGTGGAAGTGTAGTGTAGAGGTGAAATTCGTAGATATTAGCAAGAACACCA  
GTGGCGAAGGCGGCAAACTGGGCATCATCTGACGCTGAGGCGCGAAAGCGTGGGTAGCAA  
ACAGGATTAGATACCCGAGTAGTCC

>Otu28959

CCAGCCTACGGGACGCAGCAGTAGGGAATTTTCCACAATGGGCGAAAGCCTGATGGAGCA  
ACGCCGCGTGCGAGGATGAATGTCTTCGGATTGTAAACTGCTTTTTATGTATGACGATTATG  
ACGGTAGTACACGAATAAGGATCGGCTAACTCCGTGCCAGCAGCCGCGGTCATACGGAGG  
ATCCAAGCGTTATCCGGAATTACTGGGCGTAAAGAGTTGCGTAGGTGGCAGAGTAAGCAG  
GACATGAAAGCGTGTGGCTCAACCATAACAGACATGTTTTGAACTGCTCAGCTTGAGGACG  
AGAGAGGTAATTGGAATTCCTAGTGTAGGAGTGAAATCCGTAGATATTAGGAGGAACACC  
GATGGCGTAGGCAGATTACTAGCCCCGTTCTTGACACCCAGGCACGAAAGCGTGGGGAGCA  
AACGGGATTAGAAACCCCCGTAGTCC

>Otu28972

CCAATGGGGCGCTCCAGTCGAGGATCTTCGGCAATGGGCGCAAGCCTGACCGAGCGACGC  
CGCGTGCGGGATGAAGGCCTTCGGGTTGTAAACCGCTGTCAGTAGGGAGGAAATTTTCATG  
GGGTACTCCCTGTGAATTGACCTATCTGCAGAGGAAGGACGGGCTAAGTTCGTGCCAGCA  
GCCGCGGTAAGACGAACCGTCCAAACGTTATTCGGAATCACTGGGCTTAAAGGGTGCGTA  
GGCGGTCCAGTAAGTTGGGTGTGAAAGCCCTCGGCTCAACCGAGGAATTGCGCCCCAAAC  
TACTGGACTTGAGGGAGACAGAGGTAAGCGGAACCTTAAGGTGGAGCGGTGAAATGCGTTA  
ATATCTTAAGGAACACCAGGAGCGAAAGCGGCTTACTGGGTCTCTTCTGACGCTGAGGCA  
CGAAAGCTAGGGGAGCGAACGGGATTAGAAACCCGAGTAGTCC

>Otu29021

CCAGCCTACGGGGCGCTGCAGTGGGGAATATTGGACAATGGGCGGAAGCCTGATCCAGCA  
ATACCGCGTGTGTGAAGAAGGCCTTCGGGTTGTAAAGCACTTTCAGGGGGGAAGAAGGGT  
TGTGCGCGAATAACGTACAACATTGACGTTACCCCCAGAAGAAGCACCGGCTAACTCTGT  
GCCAGCAGCCGCGGTAATACAGAGGGTGCAAGCGTTAATCGGAATTACTGGGCGTAAAGG  
GTGCGTAGGTGGTTAGATAAGTTGGGCGTGAAATCCCCGGGCTCAACCTGGGAACTGCGT  
TCAAACTGGCTAGCTAGAGTATGGTAGAGGTAAGCGGAATTTCCGGTGTAGCGGTGAAA  
TGCGTAGATATCGGAAGGAACATCAGTGGCGAAGGCGGCTTACTGGACTGATACTGACAC  
TGAGGCACGAAAGCGTGGGGAGCAAACAGGATTAGATACCCTAGTAGTCC

>Otu29035

CCAGCCTATGGGTGGCAGCAGTGGGGAATCCTGCGCAATGCGCGAAAGCGTGACGCAGCA  
ACGCCGCGTGGGGGAAGAAGGCTTTCGGGTTGTAAACCCCTTTCAGTTGGGACGAAGCCT  
CGGCGGTGAATAGCCGACCGAGGTGACGGTACCTTCACAAGAAGCACCGGCTAACTACGT  
GCCAGCAGCCGCGGTAATACGTAGGCAGCAAGCGTTGTTTCGGAGTTACTGGGCGTAAAGG  
GTGTGTAGGCGGTTGCCTAAGTTTGGTGTGAAATCTCCCGGCTTAACCGGGAGGGTGCGC  
CGAAACTGGGTGACTAGAGTATGGGATGGGTAAGTGGAAATTCCTGGTGTAGCGGTGAAA  
TGCGTAGATATCAGGAGGAACACCGGTGGTGTAGACGGCTTACTGGACCATAACTGACGC  
TGAGACACGAAAGCGTGGGTAGCAAACAGGATTAGAGACCCCGGTAGTCC

>Otu29066

CCAGCCTATGGGGCGCTGCAGTCGAGGATCTTTCGCAATGGGCGAAAGCCTGACGGAGCG  
ACGCCGTGTGAGTGATGAAGGCCTTCGGGTTGTAAAGCTCTTTCGCATGGGAACAAGAGA  
AAGTCGTGAATAACGATTTGATTTGAGGGTACCAAGTAAAGAAGCACCGGCTAACTCCGT  
GCCAGCAGCTGCGGTAATACGGAGGGTGCAAGCATTAATCGGAATTATTGGGCGTAAAGG  
GCGCGTAGGCGGATTGATAAGTCAGATGTGAAATTCGGGGGCTCAACTTCGGAGCTGCAT  
TTGAGACTGTTGATCTAGAGGGTAGGCGGAGAAAATGGGATTCCACAAGTAGCGGTGAAA  
TGCGTAGATATGTGGAAGAACACCGGTGGCGAAGGCGGTTTTCTAGCTTATTCCTGACGC  
TGAGGCGCGAAAGCAAGGGGATCAAACAGGATTAGAAACCCCTGTAGTCC

>Otu29106

CCAGCCTATGGGTTGCAGCAGTCGAGAATTTTTCTCAATGGGGGAAACCCTGAAGGAGCG  
ACGCCGCGTGAGGATGAAGGCTTTCGGATTGTAAACTCCTGTCATTAGGGAACAATGGT  
CAGCGATTAACTGTCGCGGGCTTGATAGTACCTGAAGAGGAAGAGACGGCTAACTCTGTG  
CCAGCAGCCGCGGTAATACAGAGGTCTCAAGCGTTGTTTCGGATTTCATTGGGCGTAAAGGG  
TGCGTAGGCGGCGGGGCAAGTCAGGTGTGAAATCTCGGGGCTCAACTCCGAAACTGCACT  
TGATACTGCCTTGCTAGAGTACTGGAGAGGAGATTGGAATTTACGGTGTAGCAGTGAAAT  
GCGTAGATATCGTAAGGAAGACCAGTGGCGAAAGCGACTTCCTGGTCTGAATACTGACGTT  
CATGTGCGAAAGCGTGGGGAGCAAACAGGATTAGAAACCCGTGTAGTCC

>Otu29138

CCAGCCTACGGGTCGCTGCAGTTGGGAATCTTGGACAATGGGGGAAACCCTGATCCAGCC  
ATGCCGCGTGAGTGATGAAGGCCCTTCGGGTGTAAACTCTTTCGACGGGGACGATAATG  
ACGGTACCCGTAGAAGAAGCTCCGGCTAACTTCGTGCCAGCAGCCGCGGTAATACGAAGG  
GGGCTAGCGTTGTTTCGGAATTACTGGGCGTAAAGCGCGCGCAGGCGGTCTTCCAAGTCAG  
TGGTGAAAGCCCCGAGCTCAACTCCGGAAGTCCATTGAAACTGTGAGACTTGAGTACGA  
GAGAGGTGAGTGGAATTCAGTGTAGAGGTGAAATTCGTAGATATTGGGAGGAACACCA  
GAGGCGAAGGCGGCAACCTGGACAAGTACTGACACTCAACTACGAAAGCGTGGGGAGCAA  
ACAGGATTAGAGACCCGCGTAGTCC

>Otu29147

CCAGCCTATGGGGTGCTCCAGTAGGGAATATTGGACAATGGGCGAAAGCCTGATGGAGCG  
ACGTTTCGTGAATGAAGAAGCCCTTCGGGTGTAAAGTCTTTTTTAGGGGAGGAACCCG  
CAAGGTTGACAGTACTCTAAGAATAAGGAGATCCTAATTCTGTGCCAGCAGGAGCGGTAA  
GACAGAATCTCCAGGCGTTATCCGGATTTACTGGGCGTAAAGGATTTCGTAGGTGATTGGG  
TAAGTTAAAGTTAAACTCATCGGCTCAACCTTTGAGGTGCTTTTAATACTGCCCCGAAT  
AGAGGATGTTAGAGGCTAACGGAACCGACGGTGTAGGGGTGAAAGCCGTGATATCGTCG  
GGAACACCAAATGCGAAGGCAGTTAGCTGGGACAATCCTGACACTGAGGAATGAAAGCGT  
GGGGATCAAAAAGGATTAGATACCCTAGGAGTCC

>Otu29162

CCAGCCTACGGGTCGCGAGCAGTCGAGAATTTTTCAATGGACGAAAGTCTGATGGAGCG  
ACGCCGCGTGCGCGATGAAGGCCCTTCGGGTGTAAAGCGCGAAAGTGGGGATAAAACCGC  
AAGGTTGATTGATCCACAGTAAGGACGGGCTAAGTTTCGTGCCAGCAGCCGCGGTAAGACG  
AACTGTCCAAACGTTGTTTCGGAATCACTGGGCTTAAAGGGCGCGTAGGCGGTGACCAAG  
TCAGGGGTGAAATCCTGCAGCTTAACTGTAGAAGTGCTTTGATACTGGTCGTCTGGAGG  
GAGGTAGGGGTGTGTGGAACCTCCAGTGGAGCGGTGAAATGCGTTGATATTGGAAGGAAC  
GCCGAGGCGAAAGCGACGCACTGGACCTCTTCTGACGCTGAGGCGCGAAAGCTAGGGGA  
GCAAACGGGATTAGAGACCCTCGTAGTCC

>Otu29180

CCAGCCTATGGGGCGCACCAGTGGGGAATCTTGCGCAATGGACGAAAGTCTGACGCAGCC  
ACGCCGCGTGAGTGAAGAAGGCCCTTCGGGTGTAAAGCTCTGTGCGAGGGGACGAAAATG  
CAAACGGTTAATAGCCGTATGTACTGACGGTACCCTCAAAGGAAGCACC GGCTAACTTCG  
TGCCAGCAGCCGCGGTAATACGAGGGGTGCAAGCGTTGCTCGGAATTATTGGGCGTAAAG  
GGTAGGTAGGTGGTCTCATTTGTCTGGGGTGAAAGCCTTGAGCTTAACTCAAGAAGTGCC  
TTAGAAACGGTGAGACTGGAGTATTGGAGAGGGTTCGTGGAATTCGGGTGTAGCGGTGAA  
ATGCGTAGAGATCGGGAGGAACACCAGAGGCGAAAGCGGCGACCTGGACAATTACTGACA  
CTCAACTACGAAAGCGTGGGGAGCAAACAGGATTAGATACCCCTGTAGTCC

>Otu29197

CCAGCCTACGGGTGGCTGCAGTGGGGAATATTGGACAATGGGCGCAAGCCTGATCCAGCC  
ATGCCGCGTGAGTGATGAAGGCCCTAGGGTTGTAAAGCTCTTTTGTGCGGGAAGATAATG  
ACGGTACCGAGAGAAGAAGCCCCGGCTAACTTCGTGCCAGCAGCCGCGGTAATACGAGGG  
GGGCAAGCGTTGTTTCGGAATTATTGGGCGTAAAGGGTTCGTAGGCGGTTTGATAAGTTTG  
ATGTGAAATCTCCGGGCCTAACCCGGAAGTGCCTCGGATACTATCCGGCTAGAGGATTG  
GAAGGGAGACTGGAATACTTGGTGTAGCAGTGAAATGCGTAGATATCAAGTGGAACACCA  
GTGGCGAGGGCGAGTCTCTGGACAATTCTGACGCTGAGGCACGAAAGCCAGGGGAGCAA  
ACGGGATTAGAAACCCCTCGTAGTCC

>Otu29205

CCAGCCTACGGGTGGCTCCAGTGAGGAATTTTCCGCAATGGACGCAAGTCTGACGGAGCG  
ACGCCGCGTGTTGGGAAGAAGGCCCTTCGGGTGCTAAACCACTGTCGAAGGGGAAGATATTG  
ACGGTACCCCTTGAGGAAGCCCCGGCTAACTACGTGCCAGCAGCCGCGGTAAGACGTAGG

GGGCGAGCGTTATTTCGGAATTATTGGGCGAAAAGAGTTCGTAGGCGGCTTGATCAGTCTG  
TGAAGAAAGACCTGGGCTCAACCCAGGGAACGGCACAGATACTATCGAGCTTGAGGTCAT  
CAGAGGATAATGGAATTCCTGGTGTAGCGGTGAAATGCGTAGATATCGGGAGGAACACCA  
GTGGCGAAGGCGATTATCTGGGGTGAATCTGACGCTGAGGAACGAAAGCTAGGGGAGCAA  
ACGGGATTAGAAACCCCGTAGTCC

>Otu29214

CCAGCCTACGGGGTGCTGCAGTGGGGAATCTTGCGCAATGGACGAAAGTCTGACGCAGCC  
ACGCCGCGTGAGTGAAGAAGGCCTTCGGGTGTAAAGCCCTGTCGGAGGGGACAAAAAAT  
CTTATAGTTAATAGCTATAGGACTTGATGGTACCCTCAAAGGAAGCACCGGCTAACTTCG  
TGCCAGCAGCCGCGGTAATACGAAGGGTGCAAGCGATGCTCGGAATTATTGGGCGTAAAG  
GGTAGGTAGGTGGTTACGTATGTCTGGGGTGAAATCCCTGAGCTCAACTCAGGACGTGCC  
TTGGAACGGTGTAAGTACTAGAGTACTAGAGAGGTTTCGTGGAATTCTTGGTGTAGCGGTGAA  
ATGCGTAGAGATCAAGAGGAACATCAGCGGCGAAGGCGGCGAACTGGATAGTAACTGACA  
CTGAACTACGAAAGCGTGGGGAGCAAACAGGATTAGAAACCCTAGTAGTCC

>Otu29222

CCAGCCTACGGGTGGCAGCAGTGGGGAATCTTGCGCAATGGGCGAAAGCCTGACGCAGCC  
ATGCCGCGTGAAATGATGAAGTCTTAGGATTGTAAATTCCTTCAGCAGGGACGATAATG  
ACGGTACCTGCAGAAGAAGCCCCGGCTAACTTCGTGCCAGCAGCCGCGGTAATACGAAGG  
GGGCTAGCGTTGCTCGGAATTACTGGGCGTAAAGGGCGCGTAGGCGGGTCGTTAAGTAGG  
GGTGAAAGCCCAGGGCTCAACCCTGGAATTGCCTTCTAACTGGCGGCCCTTGAGTATGG  
CAGAGGTGTGTGGAATCCGAGTGTAGAGGTGAAATTCGTAGATATTTCGGAAGAACACCA  
GTGGCGAAGGCGACACACTGGGCCATTACTGACGCTGAGGCACGAAAGCCAGGGGAGCAA  
ACGGGATTAGAAACCCTAGTAGTCC

>Otu29256

CCAGCCTACGGGAGGCACCAGTGGGGAATCTTGCAATGGACGAAAGTCTGATGCAGCA  
ACGCCGCGTGGGGGATGAAGCTTTTCGGAGTGTAACCCCTTTTCGACCCGGAAGAAAGCC  
CGCAAGGGTTTGACGGTACGGGTATAAGAAGCCCCGGCTAACTACGTGCCAGCAGCCGCG  
GTAATACGTAGGGTGCAAGCGTTAATCGGAATTACTGGGCGTAAAGCGTGCGCAGGCGGT  
CTTCCAAGTCAGTGGTGAAAGCCCCGAGCTCAACTCCGGAAGTGCATTGAAACTGTTAG  
ACTTGAGGACGAGAGAGGTGAGTGAATTCAGTGTAGAGGTGAAATTCGTAGATATTG  
GGAAGAACACCGGTGGCGAAGGCGGCTCACTGGCTCGTATCTGACGCTCAGGCGCGATAG  
CGTGGGGATCAAACAGGATTAGAAACCCCGGTAGTCC

>Otu29278

CCAGCCTATGGGTGGCTCCAGTGAGGAATATTGCGCAATGGACGAAAGTCTGATGCAGCA  
ACGCCGCGTGGGCGATGAAGGCCTTCGGGTGTAAGCCCTTTTCTGGGGGATGAGGAAG  
GACAGTACCTCAGGAATCAGTCTCGGCTAACTACGTGCCAGCAGCCGCGGTAACACGTAG  
GAGGCAAGCGTTATCCGGATTTATTGGGCGTAAAGCGCATGCAGGTGGTTCCACAAGTCG  
GATGTGAAAGCCCCTGGCTTAACTGGGGGAGGTCGTTGATACTGTGGGGCTGGAGGTGCG  
GAAGAGGGAAGCGGAATTCCCGGTGTAGTGGTGAATGCGTAGATATCGGGAGGAACACC  
AGTGGCGAAAGCGGCTTCCTGGTCCGCACCTGACACTAAGATGCGAAAGCGTGGGGAGCG  
AACGGGATTAGAAACCCTGTAGTCC

>Otu29288

CCAGCCTATGGGAGGCTCCAGTAGGGAATATTGGGCGATGGGCGAAAGCCTGACCCAGCA  
ACGCCGCGTGACAGATGAAGTCTTCGGATCGTAAGTGCTTTTCTGAGAGATGAGAAAG  
GACAGTATCTCAGGAATAAGTCTCGGCTAACTACGTGCCAGCAGCCGCGGTAACACGTAG  
GAGGCAAGCGTTATCCGGATTTACTGGGCGTAAAGCGTGTGCAGGCGGTTTCGGAAGTTG  
GATGTGAAAGCTCCCGGCTTAACTGGGAGAGGTCGTTCAATACTTCTGGAAGTAGAGGATG  
AGAGAGGGAGGTGGAATTCCGGGTGTAGTGGTGAATGCGTAGATATCCGGAGGAACACC  
AGTGGCGAAAGCGGCCTCCTGGCTCATTTCTGACGCTCATACACGAAAGCGTGGGTAGCA  
AACAGGATTAGAAACCCCGTAGTCC

>Otu29289

CCAGCCTATGGGATGCTGCAGTAGGGAATATTGGGCAATGGGCGAAAGCCTGACCCAGCA  
ACGCCGCGTGAAAGATGAAGGCCTTCGGGTGTAAACTCCTTTTGGTTCGGACGAGGAAG  
GACGGTACGGACTGAAGAAGTCACGGCTAACTACGTGCCAGCAGCCGCGGTAACACGTAG  
GTGGCGAGCGTTATCCGGATTTACTGGGCGTAAAGCGTGTGCAGGCGGTGGGACAAGTGG  
TGTATGAAATCGCCCGGCTTAAACGGGCGGGGTTAGGCCAGACTGTCCGACTGGAGTGGC  
GGAGAGGGGCGTGGAATTCCGGGTGTAGTGGTGAATGCGTAGAGATCCGGAGGAACCCC  
AGAGGCGAAGGCGGCGCCCTGGCCGACACTGACGCTCAGACACGACAGCATGGGGAGCG



AACGGGATTAGAGACCCGTGTAGTCC

>Otu29294

CCAGCCTATGGGGTGCAGCAGTGGGGAATATTGGACAATGGGGGAAACCCTGATCCAGCC  
ATGCCGCGTGCCTGATGAAGGCCTTAGGGTTGTAAAGCGCTTTCGGCGGGGACGATGATG  
ACGGTACCCGCGAGAAGAAGCCCCGGCTAACTTCGTGCCAGCAGCCGCGGTAATACGAAGG  
GGGCTAGCGTTGTTCCGAATTACTGGGCGTAAAGGGCGCGTAGGCGGCCCTGCAAGTCAG  
AGGTGAAAGTCCTGGGCTCAACCTGGGGATTGCCTTTGAGACTGCGGGGCTTGAGACCGG  
GAGAGGGTAGCGGAATTCCCACTGTAGAGGTGAAATTCGTAGATATTGGGAAGAACACCA  
GTGGCGAAGGCGGCTACCTGGACCGGTTCTGACGCTGAGGCGCGAAAGCGTGGGGAGCAA  
ACAGGATTAGAGACCCTAGTAGTCC

>Otu29308

CCAGCCTACGGGGGGCACCAGTGAGGAATTTTCGTCAATGGGGGCAACCCTGAACGAGCA  
ACGCCGCGTGCAGGATGAAGGTTTTCGGATCGTAAACTGCTTTTCTTGGGGAAGAGAACG  
GACGGTACCCAAGGAAGAAGCCCCGGCTAACTACGTGCCAGCAGCCGCGGTAATACGTAG  
GGGGCAAGCGTTGTCCGATTATTATGGGTTTAAAGGGTGCCTAGGCGGATTAATAAGTCA  
GCGGTGAAAACCTTCAGCTTAACTGGAGACTTGCCATTGATACTGTTAGTCTTGAGTACG  
GTCAAGGTAGGCGGAATGTGTAATGTAGCGGTGAAATGCTTAGATATTACACAGAACACC  
GATTGCGAAGGCAGCTTACTGGGCCATTACTGACGCTGATGCACGAAAGCGTGGGGAGCA  
AACAGGATTAGAAACCCTGGTAGTCC

>Otu29309

CCAGCCTATGGGGCGCACCCAGTAGGGAATTTTGCGCAATGGGAGAAATCCTGACGCAGCG  
ACGCCGCGTGAGTGAAGAAGGCCTTCGGGCTGTAAAGCTCTGTCAGAGGGGACGAATAAC  
CGGAGTCAAACAGGCTCACGGGATGACGGTACCCTCAGAGGAAGCACCGGCTAACTCTGT  
GCCAGCAGCCGCGGTAATACAGAGGGTGCAAGCGTTATTCGGAATCACTGGGCGTAAAGC  
GCATGTAGGTGGAGTATCAAGTCAGGTGTGAAATCCCGGGGCTCAACTTCGGAATTGCGC  
TTGAAACTGATATTCTTGAGATTGGGAGAGGGAAGTGGAATTCAGGTGTAGAGGTGAAA  
TTCGTAGATATCTGGAGGAACATCGGAGGCGAAGGCGGCTTCCTGGTCCAATTCTGACAC  
TGAGATGCGAGAGCGTGGGTAGCAAACAGGATTAGAAACCCCTGTAGTCC

>Otu29337

CCAGCCTACGGGTGGCAGCAGTGGGGAATCTTGCAACAATGGGGGAAACCCTGATGCAGCG  
ACGCCGCGTGGGTGACGAAGGCCTTCGGGCTGTAAACCCCTTTTAGCAGGGACGAGTGAG  
GACGGTACCTGTTGAATAAGTCTCGGCTAACTACGTGCCAGCAGCCGCGGTAACACGTAG  
GAGGCGAGCGTTATCCGGATTCACTGGGCGTAAAGCGCGCGTAGGCGGTTAGGTAAGTCG  
GACGTTAAAGCCCCTGGCTCAACTGGGGGAGGTCGTTGATACTGCTTGCTTGAGGATG  
AGAGAGGAAAGCGGAATTCCCGGTGTAGCGGTGGAATGCGTAGAGATCGGGAGGAACACC  
AGTGCGAAGGCGGCTTTCTGGCTCATTTCTGACGCTCATACACGAAAGCTAGGGTAGCA  
AACGGGATTAGATACCCGAGTAGTCC

>Otu29350

CAGCCTACGGGGTGCTGCAGTGGGGAATTTTGCGCAATGGGGGAAACCCTGACGCAGCCA  
TACCGCGTGTGTGATGAAGGTCTTCGGATTGTAAAGCACTTTCAGTGGGGACGACGATGA  
CGGTACCCACAGAAGAAGTCACGGCTAACTTCGTGCCAGCAGCCGCGGTAATACGAAGGT  
GGCGAATGTTGCTCGGATTCACTGGGCGTAAAGCGTCGGTAGGAGGCTTGTTAAGTTAGG  
TGTGAAAGCCCCGCGCTCAACGTGGGAATTGCACCTAAAACTAACTGGCTAGAAGGTATG  
AGAGGATGGCGGAATGACTGGTGTAGAGGTAAAATTCATAGATATCAGTCGGAACACCCA  
TGCGCAAGGCAGCTATCTGGCATATTCTTGACTCTGAGCGACGACAGCGTGGGGAGCAAA  
CAGGATTAGATACCCTCGTAGT

>Otu29352

CCAGCCTATGGGTCGCTCCAGTAGGGAATATTGGTAATGTGCGAAAGCGCGAACCAGCAA  
CGCCGCGTGCACGATGAAGGCCTTCGGGTTGTAAAGTCCTTTTCAGTGGGAAGAGGAAGG  
ACGGTACCACTGGAATAAGCCTCGGCTAACTACGTGCCAGCAGCCGCGGTAACACGTAGG  
AGGCGAGCGTTATCCGGATTTACTGGGTGTAAAGCGCATGCAGGCGGCTCGTTAAGTTGG  
GTGTGAAAGCTTCCGGCTCAACTGGGAGAGGTTGCTCAAGACTGGCGAGCTAGAGAGTGG  
TAGGGGAAGGCGGAATTCCGGGTGTAGTGGTGAAATGCGTAGATATCCGGAGGAACACCA  
GTGGCGAAAGCGGCCTTCTGGACCATTCTGACACTGATACGCGAAAGCTAAGGTAGCAA  
ACGGGATTAGATACCCGTGTAGTCC

>Otu29368

CCAGCCTACGGGTCGCGAGCAGTCGAGGATCTTCGGCAATGGGCGCAAGCCTGACCGAGCG  
AGGCCGCGTGAGCGATGAAGGCCTTCGGGTTGTAAAGCTCTGTCGAGAGGGAGAAAAGCG

CAAGCTTGATCTATCTCTGGAGGAAGCACGGGGCTAAGTTCGTGCCAGCAGCCGCGGTAAAG  
ACGAACCGTGCGAACGTTGTTTCGGAATCACTGGGCTTAAAGGGCGCGTAGGCGGGCCACC  
AAGTCCGGGGTGAAATCCTCCAGCTTAACTGGAGAACTGCCTCGGATACTGGAGGTCTCG  
AGGGAGATAGGGGCACGCGGAACGTGTGGGTGGAGCGGTGAAATGCGTTGATATCCATAGG  
AACTCCGGTGGCGAAGGCGGCGTGCTGGATCTCTTCTGACGCTGAGGCGCGAAAGCCAGG  
GGATCAAACGGGATTAGATAACCCCGTAGTCC

>Otu29387

CGCCTATGGGGGGCAGCAGTGGGGAATCTTGACACAATGGACGAAAGTCTGATGGAGCAAC  
GCCGCGTGAGGATGAAGGCCCTTCGGGTTGTAACTGCTTTTATCTGTGACGATTATGAC  
GGTAACAGATGAATAAGGGTCTGCTAACTACGTGCCAGCAGCCGCGGTCATACGTGGGAC  
CCAAGCGTTATCCGGAATTACTGGGCGTAAAGAGTTGCGTAGGTGGCAGAGTAAGTAGGT  
AGTGAAATTGTGTGGCTCAACCATACACCCATTATCTAACTGCTCAGCTAGAGCATGGG  
AGAGGTCAGTGAATTTCTAGTGTAGGAGTGAAATCCGTAGATATTAGAAGGAACACCGA  
TGGCGTAGGCAGGTGACTGGCCCATTTGCTGACACTAAGGCACGAAAGCGTGGGGAGCGAA  
CGGGATTAGAAACCCCTGTAGTCC

>Otu29392

CCAGCCTACGGGTCGCTCCAGTCGAGAATTTTTCTCAATGGGCGAAAGCCTGAAGGAGCG  
ACGCCGCGTGAGGATGAAGGTCTTCGGATTGTAACTCCTGTCATTAGAGAACAACAAACC  
CACTTAGTAAGTATGATGTTGGGTTTGATAGTATCTGAAGAGGAAGAGACGGCTAACTCTGT  
GCCAGCAGCCGCGGTAATACAGAGGTCTCAAGCGTTGTTTCGGATTTCATTGGGCGTAAAGG  
GTGCGTAGGCGGCGAAGCAAGTCAGATGTGAAATCCCGGGGCTCAACCCCGGAACTGCAT  
TTGATACTGCTTTGCTCGAGGACTGGAGAGGAGATCGGAATTCACGGTGTAGCAGTGAAA  
TGCGTAGATATCGTGAGGAAGGCCAGTGGCGAAGGCGGATCTCTGGACAGTTCCTGACGC  
TGAGGCACGAAGGCCAGGGGAGCAAACGGGATCAGAAACCCCGTAGTCC

>Otu29396

CCAGCCTATGGGGGGCAGCAGTCGAGAATTTTTCTCAATGGGCGAAAGCCTGATGGAGCG  
ACGCCGCGTGAGGATGAAGGTTTTTTCGGATTGTAACTCCTGTCAGTGCAGAACAAAGGCT  
ATGCGGTTTTAATAGACCATGTAGTTGATGGTATGCGGAGAGGTAGGGACGGCTAACTCTG  
CGCCAGCAGCCGCGGTAAGACGAACCGTGCGAACGTTGTTTCGGAATCACTGGGCTTAAAG  
GGCGCGTAGGCGGGCTGTCAAGTCTGGGGTGAAATCCCGCGGCTCAACCGTGGAAGTACC  
TTAGATACTGACGGCCTCGAGGGAGGTAGGGGCGAGCGGAACTGTGAGTGGAGCGGTGAA  
ATGCGTTGATATTCACAGGAACCTCCGGTGGCGAAGGCGGCTCGCTGGCCCTCTTCTGACG  
CTGATGCGCGAAAGCTAGGGGAGCAAACGGGATTAGAGACCCGCGTAGTCC

>Otu29417

CCAGCCTATGGGGTGACAGCAGTCGAGAATTTTTCTCAATGGGCGAAAGCCTGACGCAGCG  
ACGCCGCGTGGGTGAAGAAGGCCTTCGGGTTGTAAAGCCCTGTCGAGTGGGAAAAATGGC  
ATCTGGAATAATACGCCAGGTGATTGATGGTACCACTAGAGGAAGCACCGGCTAACTCCG  
TGCCAGCAGCCGCGGTAATACGGAGGGTGCAAGCGTTGTTTCGGAATTATTGGGCGTAAAG  
GGCAGGTAGGTGGTCTTGAAGTCTACTGTGAAATCCCGAGCTTAACTTGGGAAGTGCG  
GTGGATACTCCAAGACTAGAGTGTGAGAGGGGTGCGTGGAATTCCCGGTGTAGCGGTGAA  
ATGCGTAGATATCGGGAGGAACACCAGAGGCGAAGGCGGCGCACTGGACAGCAACTGACA  
CTCAACTGCGAAAGCGTGGGGAGCAAACAGGATTAGAAACCCGAGTAGTCC

>Otu29448

CCAGCCTATGGGATGCAGCAGGCGCGAAACTCTACAATGCAGGCAACTGCGATAGGGGA  
ACATCGAGTGGCACCCACCATGGGTGTCTGTCCAATCGTCTAAAAAACGATTGTCAGCAA  
GGGCCGGGCAAGACCGGTGCCAGCCGCGCGGTAATACCGGCGGCTCGAGTGGTGGCCAC  
TATTACTGGGCTTAAAGCGTTCGTAGCTGGTTTGTTAAGTCTCTGGGGAAATCTTCCGGC  
TTAACCGGAAGGCGTCTCAGGGATACTGGCAGACTAGGGACCGGGAGAGGTGAGGGGTAC  
TCCAGGGGTAGGAGTGAAATCCTGTAATCCTTGGGGGACCACCTGTGGCGAAGGCGCCTC  
ACCAGAACGGCTCCGACAGTGAGGGACGAAAGCTGGGGGAGCAAACCGGATTAGAACCC  
AGAGTCC

>Otu29452

CCAGCCTACGGGGGGCAGCAGTGAGGAATATTGGTCAATGGACGCAAGTCTGAACCAGCC  
ATGCCGCGTGAGGATGAAGGCCCTTCTGGGTTGTAACTTCTTTTACCTGGGAAGAAACC  
TCAGTTTTCTAACTGAGTTGACGGTACCAGAGGAATAAGCACCGGCTAACTCCGTGCCAG  
CAGCCGCGGTAATACGGAGGGTGCAAGCGTTGTTTCGGAATTACTGGGCGTAAAGCGCGTG  
TAGGCGGGTCTTTAAGTCAGGGGTGAAATGCCAAGGCTCAACCTTGGAAGTGCCTTTGAT  
ACTGGAGATCTTGAGTCCGGGAGAGGTGAGTGGAAGTGCAGTGTAGAGGTGAAATTCGT

AGATATTTCGCAAGAACACCAGTGGCGAAGGCGGCTCACTGGCCCCGGAAGTACGCTGAGA  
CGCGAAAGTGTGGGGAGCAAACAGGATTAGATACCCCTGTAGTCC  
>Otu29497  
CCAGCCTACGGGGCGCTGCAGTAAGGAATATTGGTCAATGGGCGCAAGCCTGAACCAGCC  
ATGCCGCTGAAGGATGACGGCCCTATGGGTGTAAACTTCTTTTGTACGGGAAAAAACC  
ACCGTCTGTATCGGTGCTGATGGTACCGTAAGAATAAGCATCGGCTAACTCCGTGCCA  
GCAGCCGCGGTAATACGGAGGATGCAAGCGTTATCCGGATCCATTGGGTTTAAAGGGTGC  
GCAGGCGGAGTGATAAGTCAGCGGTGAAAGCCTACAGCTTAACTGTAGAACTGCCATTGA  
TACTGTCATTCTTGAGTATTGTTGAGGTAGGCGGAATGTGTCATGTAGCGGTGAAATGCT  
TAGATATGACACAGAACACCGATCGCGAAGGCAGCTTACCAAGCAATAACTGACGCTCAT  
GCACGAAAGCGTGGGGACCAAACAGGATTAGATACCCCGTAGTCC  
>Otu29524  
CCAGCCTATGGGGGGCACCAGTGGGGAATATTGGACAATGGGCGCAAGCCTGATCCAGCA  
ATGCCGCGTGTGTGAAGAAGGCCTGCGGGTTGTAAAGCACTTTGGGCGGGGAGGAAGGCC  
CGGGGGACAATAACCCCCGGGATTGACGCCACCCGAGAACAAAGCACCGGCTAACTCCGT  
GCCAGCAGCCGCGTAATACGGAGGGTGCAGCGTTAATCGGAATTACTGGGCGTAAAGC  
GCGCGTAGGCGGTCCGGCCAGTCCGACGTGAAAGCCCCGGGCTCAACCTGGGAAGTGCCT  
GGGATACTGCCGGGCTGGAGTGTGGGAGAGGGCGGTGGAATTTCCGGTGTAGCAGTGAAA  
TGCGTAGAGATCGGAAGGAACACCAGTGGCGAAGGCGGCCCTGGACCAACACTGACGC  
TGAGGTGCGAAAGCGTGGGGAGCAAACAGGATTAGAAACCCGTGTAGTCC  
>Otu29526  
CCAGCCTATGGGTGGCAGCAGTAAGGAATATTGGACAATGGGCGCAAGCCTGATCCAGCC  
ATGCCGCGTGAAGTGAAGAAGGCCTTCGGGTGTAAAGCTCTTTTGTACGGGAGCAAATCC  
TGCATCCTAATACGATGCGGGGATGAGAGTACCTGAAGAATAAGCACCGGCTAACTACGT  
GCCAGCAGCCGCGTAATACGTAGGGTGCAGCGTTAATCGGAATTACTGGGCGTAAAGC  
GTGCGCAGGTGGTTGTGCAAGCCAGATGTGAAATCCCCGAGCTTAACTTGGGAGCTGCAT  
TTGGGACTGCACGGCTAGAGTGCCTCAGAGGGGGGTAGAATTCACGTGTAGCAGTGAAA  
TGCGTAGAGATGTGGAGGAATACCGATGGCGAAGGCAGCCCCCTGGGATAGCACTGACAC  
TCATGCACGAAAGCGTGGGGAGCAAACAGGATTAGATACCCCTCGTAGTCC  
>Otu29556  
CCAGCCTATGGGACGCACCAGTCGAGAATCTTCCGCAATGGACGAAAGTCTGGCGGAGCG  
ACGTTACGTGAAGGATGAAGCCCTTCGGGTGTAAACTTCTTTTATTTGGGAGGAAATTA  
TTGACAGTACCAGATGAATAAGGGGTCTTAATTCTGTGCCAGCAGGAGCGGTAATACAG  
AACCCCCGAGCGTTACCCGGATTTATTGGGCGCAAAGGGTCCGTAGGTGGTATAGTAAGT  
TTCGAGTTAAAGCTCATCGGCTCAACCTTTGAGATGCTCGAAATACTGCTACACTTGAGG  
GCGTTAGGGGTGATCGGAACCGACGGAGTAGGGGTGAAATCCGTTGATATCGTCGGGAAC  
ACCAAAGCGAAGGCAGATCACTAGGACGACCCTGACACTGAGGGACGAAAGCGTGGGGA  
GCAAAAAGGATTAGATACCCCTGTAGTCC  
>Otu29559  
CCAGCCTATGGGTGGCACCAGTAAGGAATATTGGACAATGGGCGCAAGCCTGATCCAGCC  
ATGCCGCGTGCAGGATGAAGGCCCTATGGGTGCTAAACTGCTTTTGGGCGGGGAAAAAACC  
CTCCGACGTGTCGGAGGTTGATGGTACCCGCAGAATAAGGATCGGCTAACTCCGTGCCAG  
CAGCCGTGGTAATACGGAGGATCCAAGCGTTATCCGGATTTATTGGGTTTAAAGGGTGC  
TAGGCGGATTAATAAGTCAGTGGTGAAGCCTACAGCTCAACTGTAGAACTGCCATTGAT  
ACTGTTAGTCTTGAGTATAGTTGAGGTGGGCGGAATATGACATGTAGCGGTGAAATGCTT  
AGATATGTCATAGAACACCGATTGCGAAGGCAGCTCACTAAGCTATTACTGACGCTGAGG  
CACGAAAGCGTGGGTAGCAAACAGGATTAGATACCCCTCGTAGTCC  
>Otu29561  
CCAGCCTATGGGGGGCAGCAGTAGGGAATATTGGGCAATGGGCGAAAGCCTGACCCAGCA  
ACGCCGCGTGCACGATGAAGGTCTTCGGATCGTAAAGTGCTTTTCTGAGAGATGAGAAAG  
GACAGTATCTCAGGAATAAGTCTCGGCTAACTACGTGCCAGCAGCCGCGGTAACACGTAG  
GAGGCAAGCGTTATCCGGATTTACTGGGCGTAAAGCGCATGCAGGTGGTTTGGTAAGTTG  
GATGTGAAATCTCCCGGCTTAACCGGGAGGGTGCGCCGAATACTGAGGGACTAGAGTACG  
GGAGAGGAAAGTGGAATTCCTGGTGTAGCGGTGAAATGCGTAGATATCAGGAGGAACACC  
GGTGGTGTAGACGGCTCTCTGGACCGTAACTGACGCTGAGACACGAAAGCGTGGGTAGCA  
AACAGGATTAGATACCCTAGTAGTCC  
>Otu29565  
CCAGCCTACGGGTCGCTGCAGTGGGGAATATTGGACAATGGTGGCAACACTGATCCAGCC

ATGCCGCGTGAGTGATGAAGGCCTTCGGGTGTAAAGCTCTTTTGGCGGGGACGATAGTG  
ACGGTACCCGCAGAATAAGCCCCGGCTAACTTCGTGCCAGCAGCCGCGGTAATACGAAGG  
GGGCTAGCGTTGTTTCGGAATCACTGGGCGTAAAGCGCACGTAGGCGGATTTATAAGTCAG  
GGGTGAAATCCCGGGGCTCAACCTCGGAAGTGCCTTTGATACTGTAAGTCTCGAGTCCGA  
TAGAGGTGAGTGGAATTCCTAGTGTAGAGGTGAAATTCGTAGATATTAGGAAGAACACCG  
GTGGCGAAGGCGGCTCACTGGATCGGTACTGACGCTGAGGTGCGAAAGCGTGGGGAGCAA  
ACAGGATTAGAGACCCCCGTAGTCC

>Otu29577

CCAGCCTACGGGGTGCAGCAGTGGGGAATCTTGACAAATGGGGGCAACCCTGATGCAGCG  
ACGCCGCGTGAGCGATGAAGCCCTTCGGGGTGTAAAGCTCTTTCGGCAGGGAAGATAATG  
ACGGTACCTGCATAAGCAGCTGCGGCTAACTACGTGCCAGCAGCCGCGGTAATACGTAGG  
CAGCGAGCGTTGTTTCGGAATTACTGGGCGTAAAGAGTATGTAGGCGGTGTTCTAAGTCTG  
TTGTGAAATCTCCCTGCTCAACTGGGAGGGTGC GGCGGAGACTGGAATGCTAGAGTATGG  
GAGAGGTAAGCGGAATTCCTGGTGTAGCGGTGAAATGCGTAGATATCAGGAGGAACACCT  
GTGGTGTAGACAGCTTACTGGACCATGACTGACGCTGAGATACGAAAGCGTGGGTAGCAA  
ACAGGATTAGATACCCGAGTAGTCC

>Otu29581

CCAGCCTACGGGTCGCTGCAGTCGAGAATTTTTCTCAATGGGCGAAAGCCTGAAGGGGCG  
ACGCCGCGTG GGGGATGAATGGCTTCGGCCCGTAAACCCCTGTCATTTGTGAACAAACCT  
GTCCACTTAACACGTGGATAGTTGATAGTAGCAGAAGAGGAAGGGACGGCTAACTCTGTG  
CCAGCAGCCGCGGTAATACAGAGGTCCCAAGCGTTGTTTCGATTCACTGGGCGTAAAGGG  
TGCGTAGGTGGCCGGGTAAGTCTGATGTGAAAGCTCGGAGCTTAACTCCGAAACTGCATT  
GGATACTATCCGGCTGGAGGGTTCGGAGGGGGGACTGGAATTCTCGGTGTAGCAGTGAAAT  
GCGTAGATATCGAGAGGAACACCAGTGGCGAAGGCGAGTCCCTGGACGACTCCTGACACT  
GAGGCACGAAAGCTAGGGGAGCAAACAGGATTAGATACCCCTGTAGTCC

>Otu29611

CCAGCCTATGGGGTGCTGCAGTCGAGAATTTTTTCACAATGGGCGCAAGCCTGATGGAGCG  
ACGTTACGTGAATGAAGAAGCCCTTCGGGGTGTAAAGTTCTTTTCTCTGGGAGGAAGCCG  
CAAGGCAGACAGTACCAGAGGAATAAGGGGATCCTAATTCTGTGCCAGCAGGAGCGGTAA  
GACAGAATCCCCAAGCGTTACCCGATTTATTGGGCGTAAAGGGTCTGTAGGTGGTAAAG  
TAAGTTGAAAATTAAAGCTCATCGGCTTAACCTTTGAGATTTTTTCAAACCTGCTTTACT  
TGAGGGCGTTAGGGGCTAACGGAACGACGGAGTAGGGGTGAAATCCGTTGATATCGTCG  
GGAACACCAAAAGCGAAGGCAGTTAGCTAGGACGACCCTGACACTGAGGGACGAAAGCGT  
GGGGAGCAAAAAGGATTAGAAACCCGTGTAGTCC

>Otu29614

CCAGCCTACGGGGTGCACCAGTCGAGAATTTTTTCACAATGGGGGAAACCCTGATGGAGCG  
ACGCCGCGTG GGGGATGAATGGCTTCGGCCCGTAAACCCCTGTCATTTGCGAACAAATTC  
CATACGTCAACAACGGATGGATTGATTGTAGCGGAAGAGGAAGGGACGGCTAACTCTGTG  
CCAGCAGCCGCGGTAATACAGAGGTCCCAAGCGTTGTTTCGATTCACTGGGCGTAAAGGG  
TGCGTAGGTGGCCAGGTAAGTCTGATGTGAAAGCTCGCAGCTTAACTGCGAAATGGCATT  
GGATACTCTCTGGCTTGAGGATCGAAGGGGGGACTGGAATTCTCGGTGTAGCAGTGAAAT  
GCGTAGATATCGAGAGGAACACCAGTGGCGAAGGCGAGTCCCTGGACGAATCCTGACACT  
GAGGCACGAAAGCTAGGGGAGCAAACAGGATTAGATACCCCTCGTAGTCC

>Otu29647

CCAGCCTACGGGGCGCTGCAGTCGAGAATTTTTTCACAATGGGCGAAAGCCTGATGGAGCG  
ACGCCGCGTG GGGGATGAATGGCTTCGGCCCGTAAACCCCTGTCATTTGCGAACAAACCT  
CGCCATTTAAAAGATGGCGAGCTGATTGTAGCGAAAGAGGAAGGGACGGCTAACTCTGTG  
CCAGCAGCCGCGGTAATACAGAGGTCCCAAGCGTTGTTTCGATTCACTGGGCGTAAAGGG  
TGCGTAGGCGGTTCGGTAAGTCTGACGTGAAATCTCGCGGCTCAACCGCGAAACTGCGTC  
GGATACTATCCGGCTTGAGGAATGGAGGGGAGACTGGAATTCTCGGTGTAGCAGTGAAAT  
GCGTAGATATCGAGAGGAACACCAGTGGCGAAGGCGAGTCCCTGGACGACTCCTGACACT  
GAGGCACGAAAGCTAGGGGAGCAAACAGGATTAGATACCCGAGTAGTCC

>Otu29657

CCAGCCTACGGGATGCTGCAGCTAAGAATATTCGCAATGGACGAAAGTCTGACGGAGCG  
ACGCCGCGTG GAGGATGAAGTGCTTCGGCATGTAACTCCTTTTGCCAGGGAAAAAGTTA  
TTGATTGTACCTGGAGAATAAGAGGTTGCTAAACTCGTGCCAGCAGCAGCGGTAATACGA  
GTGCCTCGAGCGTTATCCGGAATCATTGGGCGTAAAGGGTGC GTAGGCGGCGATGTTAGT  
CTCCCGTAAAATCTTTCGGCTCAACCGAGAGTCCGCGGGGAAACGGCATGGCCAAGAGG

GCGGGAAAGGTCTCTGGAACATCATGGTGTAGCGGTGAAATGCGTTGATATCATGGGGAAAC  
ACCGAAAGCGAAGGCAAGAGACTGGCCCCGTTTCCTGACGCTGAAGCACGAAAGCGTGGGT  
CGCGAATGGGATTAGATACCCAGTAGTCC

>Otu29662

CCAGCCTACGGGTGGCACCAGTGAGGAATATTGGTCAATGGACGCAAGTCTGAACCAGCC  
ATGCCGCGTGAAGGATGAAGGCGTTCTGCGTCGTAAACTTCTTTTATCTGGGAAGAAACC  
TCTGTTTTCTAATAGAGTTGACGGTACCAGAGGAATAAGCACCGGCTAACTCCGTGCCAG  
CAGCCGCGTAATACGGAGGGTGCAAGCGTTATCCGGATTTACTGGGTTTAAAGGGTGTG  
TAGGCGGACTTTTAAGTCAGTGGTGAAATCTTCGGGCTCAACCCGGAACTGCCATTGAT  
ACTATTAGTCTTGAATCTTGTGGAGGTAGGCGGAATGTGTCATGTAGCGGTGAAATGCAT  
AGATATGACACAGAACACCGATTGCGAAGGCAGCCTACTACGCAAGTATTGACGCTGAGG  
CACGAAAGCGTGGGGATCAAACAGGATTAGAGACCCTTGTAGTCC

>Otu29681

CCAGCCTATGGGTCGCTGCAGTGGGGAATTTTTCGCGCAATGGGGGAAACCCTGACGCAGCA  
ACGCCGCGTGAGTGATGAAGGCTTTTCGGGTCGTAAAGCTCTGTCAGTGGGGAAGAAATGT  
TACTGGCTAATATCCAGTGATCTTGACGGTACCCACAAAGGAAGCACCGGCTAACTCCGT  
GCCAGCAGCCGCGTAATACGGGGGGTGCAAGCGTTGTTTCGGATTTATTGGGCGTAAAGC  
GCGTGTAGGCGGTTTCTTAAGTCTGATGTGAAAGCCCTGGGCTCAACCCGGGAAGTGCAT  
TGGAAGTGGGAGACTTGAATACGGGAGAGGGCAGTGGAATTCCTGGTGTAGGAGTGAAA  
TCCGTAGATATCAGGAGGAACACCGGTGGCGAAGGCGGCTGCCTGGACCGATATTGACGC  
TGAGACGCGAAAGCGTGGGGAGCAAACAGGATTAGAGACCCCGTAGTCC

>Otu29684

CCAGCCTATGGGGGGCTGCAGGCGCGAAAACCTTTACAATGCGGGAAACCGTGATAAGGGA  
ACTCTGAGTGCCCGTAAATCGGGCTGTCCATTGGTTTAAATAACCAGTGAAGAAAGGGC  
CGGGCAAGACCGGTGCCAGCCGCCGCGGTAATACCAGCTCTCCGAGTGGTGTGGATGTTT  
ATTGGGCCTAAAGCATCCGTAGCTGGCTAGGTTAGTCCCTGTAAATCCACCGAATTAA  
TCGTTGGATTGCGGGGAATACTGCTTGGCTAGGGGACGAGAGAGGCAGACGGTATTTCCG  
GGGTAGGGGTGAAATCCTATAATCCCGGGAAGACCACAGTGGCGAAGGCTGTCTGCTAG  
AACGCGCCCGACGGTGAGGGATGAAAGCTGGGGGAGCGAACCAGGATTAGATACCCAGTA  
GTCC

>Otu29736

CCAGCCTACGGGAGGCAGCAGTTCGGAATAATTCGCAATGGGCGAAAGCCTGACGATGCG  
ACGCCGCGTGAGGATGAAGGCCTTACGGTTGTAAACTTCTGTCACGGGTTTACAAGTCA  
CAGACCGTGAATAACGGTTTGTGTTGAGCTTAGCCCGAGAGGAAGCCCCCGCTAATTACG  
TGCCAGCAGCGCGGTAATACGTAAGGGGCGAACGTTGTTTCGGTGTCACTGGGCTTAAAG  
GGCGCGTAGGCGGCTTGTTAAGTCAGGTGTGAAAGCCCTCGGCTTACCCGAGGAATTGCG  
CCTGATACTGGCAGGCTTGAGGATTGGAGGGGTGGGAGGAACTCCAGGTGTAGCGGTGAA  
ATGCGCAGATATCTGGGGGAAGGCCGCGCGCAAGGCGTCCCACTGGTCAATTCCTGACG  
CTGAGGCGCGAAAGCGTGGGGAGCAAACAGGATTAGATACCCAGTAGTCC

>Otu29754

CCAGCCTACGGGGCGCAGCAGTCGAGGATCTTCCCAATGGGCGCAAGCCTGAGGGAGCG  
ACGCCGCGTGCGGGATGAAGGCCTTCGGGTTGTAAACCGCTTTAGGGGGGGAGGAAGCCG  
CAAGGTTGACCTAGCCCCAAAATAAGCACGGGCTAAGTTCGTGCCAGCAGCCGCGGTAAG  
ACGAACCGTGCTAACGTTGTTTCGGATTCACTGGGCTTAAAGGGCGCGTAGGTGGTCTGTC  
AAGTCGGGGGTGAAATCTTTCGGCTCAACCGGAAACTGCCTTCGATACTGACAGGCTCG  
AGGGAGGTAGGGGTTGCGGGAACTACCAGTGGAGCGGTGAAATGCGTTGATATTGGTAGG  
AACGCCGCTGGCGAAAGCGCGCAACTGGACCTCTTCTGACACTGAGGCGCGAAAGCTAGG  
GGAGCAAACGGGATTAGATACCCCTGTAGTCC

>Otu29768

CCAGCCTATGGGTGGCAGCAGTGGGGAATATTGGACAATGGGCGCAAGCCTGATCCAGCC  
ATGCCGCGTGAGTGATGACGGCCTTAGGGTTGTAGAGCTCTTTCACCCACGACGATAATG  
ACGGTAGTGGGAGAAGAAGCCCCGGCTAACTTCGTGCCTGCAGCCGCGGTAATACGTAGG  
GGGCGAGCGTTGTTTCGGATTTACTGGGCGTAAAGAGCGCGTAGGTGGTTCGATCAGTCGG  
AGGTGAAATCCCTCGGCTCAACCGAGGACCCGCGTCCGATACTGTGGAACCTGAGTGCAG  
GAGAGGAGAGCGGAATTCACAGTGTAGCGGTGAAATGCGTAGATATTGGGAGGAACACCG  
GTGGCGAAGGCGGCTCTCCGGACTGTCACTGACACTGAGGCGCGAAAGCTAGGGGAGCAA  
ACGGGATTAGATACCCCTCGTAGTCC

>Otu29780

CCAGCCTATGGGATGCTCCAGTAACGAATCTTCCGCAATGCACGAAAGTGTGACGGAGCG  
ACGCCGCGTGTAGGATGAAGTCCTTCGGGATGTAACTACTGTCAGGGGAAAGAAAGTTC  
TGATCTACCCAGAGGAAGAGACGGCTAACTCTGCGCCAGCAGCCGCGTAATACAGAGG  
TCTCGAGCGTTAGGCGGAATCACTGGGCTTAAAGCGCGTGTAGGTGGATCGGTAAGTACC  
TTGTGAAATCCCACAGCTTAACTGTGGAAGTCTTGGTATACTGCCAGTCTTGAGCCAGC  
TAGGGGCTACCGGAACAAATGGTGGAGCGGTGAAATGCGTAGATATCATTTGGAACGCCA  
ATGGTGAACACAGGTAGCTGGGGCCGTGCTGACACTGAGACACGAAAGCCAGGGGAGCAA  
ACGGGATTAGATACCCCCGTAGTCC

>Otu29804

CCAGCCTACGGGTGGCTCCAGTCGAGAATTTTTCTCAATGGGCGAAAGCCTGAAGGAGCG  
ACGCCGCGTGGGGGATGAATGGCTTCGGCCCGTAAACCCCTGTCATTTGCGAACAAATTG  
TTTTACCTAACACGTAAAGCATTGATTGTAGCGGAAGAGGAAGGGACGGCTAACTCTGTG  
CCAGCAGCCGCGTAATACAGAGGTCCCAAGCGTTGTTTCGGATTCACTGGGCGTAAAGGG  
TGCGTAGGCGGCTGGGTAAGTCTGACGTGAAATCTCCGAGCCTAACTCGGAAACTGCGTT  
GGAAACTATCCGGCTTGAGGAATGGAGGGGAGACTGGAATACTTGGTGTAGCAGTGAAAT  
GCGTAGATATCAAGTGGAACACCAGTGGCGAAGGCGGCTCACTGGACCACAACCTGACGCT  
GATGCACGAAAGCTAGGGGAGCAAACAGGATTAGAAACCCCTTGTAAGTCC

>Otu29815

CCAGCCTATGGGATGCTGTCAGTCGAGAATTTTTCTCAATGGGGGAAACCCCTGAAGGAGCG  
ACGCCGCGTGGAGGATGAAGGTCTTCGGATTGTAACTCCTGTCATTAGGGAACAATTGT  
CAGCAATTAATACTACTGCGGACTTGATAGTACCTGAAGAGGAAGAGACGGCTAACTCTGTG  
CCAGCAGCCGCGTAATACAGAGGTCCCAAGCGTTGTTTCGGATTCACTGGGCGTAAAGGG  
TGCGTAGGTGGCCGGGTAAGTCTGATGTGAAAGCTCGGAGCTCAACTCCGAAACGGCATT  
GGATACTATCCGGCTGGAGGGTTCGGAGGGGGGACTGGAATTCTCGGTGTAGCAGTGAAAT  
GCGTAGATATCGAGAGGAACACCAGTGGCGAAGGCGAGTCCCTGGACGACTCCTGACACT  
GAGGCACGAAAGCTAGGGGAGCAAACAGGATTAGATACCCGCGTAGTCC

>Otu29866

CCAGCCTACGGGGGGCTGCAGTGGGGAATATTGGACAATGGGCGAAAGCCTGATCCAGCA  
ATGCCGCGTGAGTGAAGAAGGTCTTCGGATTGTAAAGCTCTTTCGACGGGGACGATGATG  
ACGGTACCCGTAGAAGAAGCCCCGGCTAACTTCGTGCCAGCAGCCGCGTAATACGAAGG  
GGGCTAGCGTTGCTCGGAATGACTGGGCGTAAAGGGCGCGTAGGCGGATGATACAGTCAG  
ATGTGAAAGCCCTGGGCTTAACCTAGGAGGTGCATTTGATACTGTAGAACTAGAGATCGA  
GAGAGGAAAGTGGAATTACGAGTGTAGAGGTGAAATTCGTAGATATTCTGTAAGAACACCA  
GTGGCGAAGGCGACTTTCTGGCTCGATACTGACGCTAAGGCGCGAAAGCGTGGGGAGCAA  
ACAGGATTAGATACCCTTGTAAGTCC

>Otu29916

CCAGCCTACGGGTGGCAGCAGTCGAGGATCTTCGGCAATGAGCGCAAGCTTGACCGAGCG  
ACGCCGCGTGAGCGACGAAGGCCTTCGGGTGTAAAGCTCTTTAGTGGGGGAGAAAAGCC  
CGCAAGGGTGTGATCTATCCCAAAAATAAGCACGGGCTAAGTTCGTGCCAGCAGCCGCGG  
TAAGACGAACCGTGCAACGTTGTTTCGGAATCACTGGGCTTAAAGGGCGCGTAGGCGGGC  
TGTCAGTCTGGGGTGAAATACCGCGGCTCAACCGTGGAAGTGCCTTAGATACTGACGGC  
CTCGAGGGAGGTAGGGGCGTGCGGAAGTGTAGGTGGAGCGGTGAAATGCGTTGATATCTA  
CAGGAAGTCCGGTGGCGAAAGCGGCGCGCTGGACCTCTTCTGACACTCAGGCACGAAAGC  
GTGGGGAGCAAAAGGGATTAGATACCCCAGTAGTCC

>Otu29935

CCAGCCTACGGGGCGCTGCAGTAGGGAATATTGGACAATGGGTGAGAGCCTGATCCAGCC  
ATGCCGCGTGACAGGAAGAAGGCCTTCTGGGTGTAAAGTCTTTTGGCAGGGGATAAAAG  
ACCCTTGCGAGGGAAATTGAAGGTACCTGGTGAATAAGCACCGGCTAACTCCGTGCCAGC  
AGCCGCGGTAATACGGAGGGTGCAAGCGTTATCCGGATTCACTGGGTTTAAAGGGTTCGT  
AGGCGGGCAGGTAAGTCAGTGGTGAATCTCCGGGCTTAACCCGGAAGTGCCTTGATA  
CTATCTGTCTTGAATATCGTGGAGGTGGGCGGAATATGTCATGTAGCGGTGAAATGCTTA  
GATATGACATAGAACCAATTGCGAAGGCAGCTCGCTACACGGTTATTGACGCTGAGGC  
ACGAAAGCGTGGGGATCAAACAGGATTAGATACCCCAGTAGTCC

>Otu29937

CCAGCCTATGGGGTGCAACAGTGGGGAATATTGGACAATGGGCGCAAGCCTGATCCAGCC  
ATGCCGCGTGAGTGATGAAGGCCTTAGGGTTGTAAAGTCTTTTGGCGGGGACGATGATG  
ACGGTACCCGCAGAATAAGCTCCGGCTAACTTCGTGCCAGCAGCCGCGTAATACGAAGG  
GAGCTAGCGTTGTTTCGGAATTACTGGGCGTAAAGGGCGCGTAGGCGGCTTGGAAGTTGG

GTGTGAAAGCCCTGGGCTCAACCCGGGAATTGCACTCAAGACTGCCTTGCTCGAATTCGG  
TAGAGGTTGGTGGAATTGCCAGTGTAGAGGTGAAATTCGTAGAGATTGGCAAGAACACCC  
GTGGCGAAGGCGGCCAACTGGACCGACGTTACGGCACGAAAGCGTGGGGAGCAAACAGGA  
TTAGATACCCTAGTAGTCC

>Otu29954

CCAGCCTACGGGGTGCTGCAGTGAGGAATTTTCGTCAATGGGGGAAACCCTGAACGAGCA  
ACGCCGCGTGACAGGAAGAAGGTTTTTCGGATCGTAAACTGCAAATCTCTGGGAAGAGAGAG  
GACGGTACCAGAGGAGAAGCCCCGGCTAACTACGTGCCAGCAGCCGCGGTAATACGTAGG  
GGGCGAGCGTTGTCCGGAGTTACTGGGCGTAAAGCGTGCGCAGGCGGTTCTCTATGTTTCG  
GTGTGAAATCTCCCGGCTTAACTGGGAGGGTGCGCCGAAAACCTGGAGGGCTTGAGTATGG  
GAGAGGAAAGCGGAATTCCTGGTGTAGCGGTGAAATGCGTAGATATCAGGAGGAACACCT  
GCGGTGTAGACGGCTTTCTGGACCATCACTGACGCTGAGACACGAAAGCGTGGGGAGCAA  
ACAGGATTAGATACCCTAGTAGTCC

>Otu30013

CCAGCCTACGGGTTGCAGCAGGCGCGAAAACTTTACAATGCGGGAAACCGTGATAAGGGA  
ACTCCGAGTGCCCGTTAAATCGGGCTGTCCACCAGTTTAAATAACTGGTGAAGAAAGGGC  
CGGGCAAGACCGGTGCCAGCCGCCGCGGTGACACCGGCGGCTCGAGTGGTAACCGCTATT  
ATTGGGTCTAAGGGTCTGTAGCCGGCTTAGTTAGTCTCTTGAGAAATCTGGCCGCTCAAC  
GGTCAGGCGTTCAGGGGATACTGCTAAAGCTCGAGACCGGGAGAGGTGAGAGGTACTTCA  
GGGTAGGGGTGAAATCTTGTAATCCTTGAAGGACCACCAAGTGGCGAAGGCGTCTCACCA  
GAACGGATCTGACGGCAAGGGACGAAAGCTAGGGGCACGAACCGGATTAGAAACCCCTAGT  
AGTCC

>Otu30020

CCAGCCTACGGGTTGCAGCAGTAGGGAATATTGGACAATGGGCGAAAGCCTGATCCAGCA  
ATGCCGCGTGAGTGAGGAAGGCCTTAGGGTTGTAAAGCACTTTTGGCAGGGACGATGATG  
ACGGTACCTGCAGAATAAGCCCCGGCTAACTTCGTGCCAGCAGCCGCGGTAATACGAAGG  
GGGCTAGCGTTGCTCGGAATGACTGGGCGTAAAGGGCGCGTAGGCGGCTGTCACAGTCAG  
ATGTGAAATTCCTGGGCTCAACCTGGGGACTGCATTTGATACGTGGCGGCTTGAGTGGAG  
AAGAGGGTTGTGGAATTTCCAGTGTAGAGGTGAAATTCGTAGATATTGGAAAGAACACCG  
GTGGCGAAGGCGGCAACCTGGTCTTTAACTGACGCTGAGGCGCGAAAGCGTGGGGATCAA  
ACAGGATTAGAAACCCGTGTAGTCC

>Otu30107

CCAGCCTATGGGATGCACCAGTGGGGAATTTTGGACAATGGGGGCAACCCTGATCCAGCA  
ATGCCGCGTGAGTGAAGAAGGCCTTCGGGTGTAAAGCTCTTTTGTGAGGGAAGAAACGG  
TGCGGGCTAATATCCGCTGCTAATGACGGTACCTGAAGAATAAGCACCGGCTAACTACGT  
GCCAGCAGCCGCGGTAATACGTAGGGTGCAAGCGTTAATCGGAATTACTGGGCGTAAAGC  
GTGCGCAGGCGGTTGTGCAAGACAGATGTGAAATCCCCGGGCTCAACCTGGGAATTGCAT  
TTGTGACTGGCAGGCTAGAGTATGGCAGAGGGGGGTAGAATTCCACGTGTAGCAGTGAAA  
TGCGTAGAGATGTGGAGGAATACCGATGGCGAAGGCAGCCCCCTGGGCCAATACTGACGC  
TCATGCACGAAAGCGTGGGGAGCAAACAGGATTAGAAACCCCTCGTAGTCC

>Otu30121

CCAGCCTATGGGTTGCTGCAGTGGGGAATATTGCGCAATGGGCGAAAGCCTGACGCAGCA  
ACGCCGCGTGAGTGAGGAAGGCCTTCGGGTGTAAACCCCTTTTACCAGGAGCGAAACTG  
ACGGTACCTGGGGAAGAAGCGCTGGCTAACTACGTGCCAGCAGCCGCGGTAATACGTAGG  
GCGCGAGCGTTGTCCGATTTATTGGGCGTAAAGAGCTCGTAGGCGGCCTGTTGCGTCCG  
CTGTGAAATCCCCGGGCTTAAACCCAGGGCCTGCAGTGGATACGGGCAGGCTAGAGGCAGG  
CAGGGGAGAACGGAATTCCTGGTGTAGCGGTGAAATGCGCAGATATCGGGAGGAACACCG  
GTGGCGAAGGCGGTTCTCTGGGCCTGTTCTGACGCTGAGGAGCGAAAGCGTGGGGAGCAA  
ACAGGATTAGAAACCCGAGTAGTCC

>Otu30123

CCAGCCTATGGGTCGCACCAGTAACGAATCTTCCGCAATGCACGAAAGTGTGACGGAGCG  
ACGCCGCGTGTTGGGACGAAGTCCTTCGGGATGTAAACCACTGTCAGGGGTTAGAAAGTTC  
TGATCAACCCAGAGGAAGGCACGGCTAACTCTGTGCCAGCAGCCGCGGTAAGACAGAGG  
TGCCAAGCGTTAGGCGGAATCACTGGGCTTAAAGCGTGTGTAGGCGGATGTCTAAGTACC  
TCGTGAAATCCCACGGCTTAAACCGTGGAAACGGCCTGGTAGACTGGGCATCTTGAGCCACT  
TAGGGGTACAGCGGAACAAATGGTGGAGCGGTGAAATGCATAGATATCATTTGGAACGCCA  
ATGGTGAAAACAGCTGACTAGGGGTGTGCTGACGCTGAGACACGAAAGCCAGGGGAGCGA  
ACGGGATTAGAGACCCCACTATCC

>Otu30135

CCAGCCTATGGGACGCTGCAGTTGGGAATCTTGACACAATGGGGGTAACCCTGATGCAGCG  
ACGCCGCGTGAGGATGACGGGTCTAGGCCCTGTAACTCCTTTTCCCCGAAAGACTTAG  
GACGGTACCGGGGAATAAGCACCGGCTAACTACGTGCCAGCAGCCGCGTAAGACGTAG  
GGTGAAGCGTTGTCCGGATTACTGGGCGTAAAGCGCGCTAGGCGGCCCGTTAAGTGT  
GAAGTGAAATCCCGTGGCTCAACTGCGGAACTGCTTCGCATACTGGCGGGCTTGAGGGAT  
GCAGAGGTTTGTGGAATTCCTGGTGTAAACGGTGAAATGTGTTGATATCAGGAGGAACACC  
TATGGCGAAGGCAGCAAACCTGGGCATTTCCCTGACGCTGAGGCGCGAAAGCGTGGGTAGCA  
AACAGGATTAGAAACCCGAGTAGTCC

>Otu30142

GGACTACTAGGGTATCTAATCCTGTTTGATCCCCGCACTTTCGTGCCTCAGCGTCAGTTA  
CAGTCTAGTAAGCTGCCTTCGCTATCGGTGTTCTTGACGATATCTAAGCATTTCACCGCT  
ACACCGTCAATTCCGCGCTACCTCGTCTGTACTCAAGCCCTGCAGTATCAATGGCACCTCG  
ACAGTTGAGCTGCCGTATTTACCACTGACTTACAGGGCCGCTACGCACCCTTTAAACC  
CAATAAATCCGGACAACGCTTGCCACCTACGTATTACCGCGGCTGCTGGCACGTAGTTAG  
CCGTGGCTTATTCACCAGGTACCTTCAATTTTCCCCCGAGGGACTTTTTATCCCTGGCA  
AAAGCAGTTTACAACCCAGAAGGCCTTCTTCCTGCACGCGGCATGGCTGGATCAGGCTCT  
CGCCATTGTCCAATATTCCCTACTGCTGCCCCCGTAGGCTGG

>Otu30145

CCAGCCTATGGGACGCAGCAGTGGGGAATTTTGGACAATGGGCGCAAGCCTGACCCAGCC  
ATGCCGCGTGAGTGATGAAGGCCTTCGGGTGCTAAAGCTCTGTGGGGAGGGAAGAAAAAC  
CGCTGGGCTAATATCCCAGCGGCCTGACGGTACCTCCTTAGCAAGCACCGGCTAACTCCG  
TGCCAGCAGCCGCGGTAATACGGAGGGTGCAAACGTTGCTCGGAATTATTGGGCGTAAAG  
CGCACGTAGGCGGCCGAATAAGTCGGGTGTGAAAGCCCTGGGCTCAACCCAGGAAGTGCA  
CTCGAAACTGCTCGGCTTGAGTATGGAAGAGGGTTGCGGAATTCCCGGTGTAGAGGTGAA  
ATTCGTAGATATCGGGAGGAACACCAGTGGCGAAGGCGGCAACCTGGGCCAATACTGACG  
CTGAGGTGCGAAAGCGTGGGGAGCAAGCAGGATTAGAAACCCTGGTAGTCC

>Otu30175

CCAGCCTATGGGAGGCTGCAGTAGGGAATATTGGACAATGGGCGGGAGCCTGATCCAGCC  
ATGCCGCGTGAGGAAGAAGGCCTTCTGGGTGTAAACTGCTTTTGCCAGGGGATAAAAG  
ACCCGTGCGCGGGGAATTGAAGGTACCTGATGAATAAGCACCGGCTAACTCCGTGCCAGC  
AGCCGCGGTAATACGGAGGGTGCAAGCGTTATCCGGATTCACTGGGTTTAAAGGGTGCGT  
AGGCGGGTTGGTAAGTCCGTGGTGAATCTCCAAGCTTAACCTGGAACTGCCGTGGATA  
CTCTCAACCTTGAATATAGTGGAGGTGAGCGGAATATGTCATGTAGCGGTGAAATGCTTA  
GATATGACATAGAACACCTATTGCGAAGGCAGCTCGCTACACTATTATTGACGCTGAGGC  
ACGAAAGCGTGGGGATCAAACAGGATTAGATACCCTCGTAGTCC

>Otu30183

CCAGCCTACGGGGCGCAGCAGTGGGGAATCTTGACACAATGGAGGAACTCTGATCCAGCC  
ATGCCGCGTGAGTGGTGAAGGCCTTAGGGTTGTAAACTCTTTCGGCGGGGACGATAATG  
ACGGTACCCGCGAGAAGAAGCTCCGGCTAACTTCGTGCCAGCAGCCGCGGTAATACGTAGG  
CAGCAAGCGTTGTTTCGGAGTTACTGGGCGTAAAGGGTGCGTAGGCGGCCCTTGTAAGTATG  
GTGTGAAATCTCCCGGCTTAACTGGGAGGGTGCGCTATTAACCTGCAGGGCTAGAGTGC GG  
GAGAGGAAAGTGGAATTCCTGGTGTAGCGGTGAAATGCGTAGATATCAGGAGGAACACCG  
GTGGTGTAAACGGCTTTCTGGACCGTAACTGACGCTGAGGCACGAAAGCGTGGGTAGCAA  
ACAGGATTAGATACCCTAGTAGTCC

>Otu30189

CCAGCCTATGGGGGGCTCCAGTCGAGAATCATTCGCAATGAGCGAAAGCTTGACGATGCG  
ACGCCGTGTGAGCGATGAAGGCCTTCGGGTGTAAAGCTCTTTCGCTTGGAACAAGGAG  
ATTTAGTGAATAACTAGAAATCTTGAGCGTACCAGGTAAGGAAGCACCGGCTAACTCCGT  
GCCAGCAGCTGCGGTAATACGGAGGGTGCAAGCATTAATCGGATTTATTGGGCGTAAAGG  
GCGCGTAGGCGGACAGGAAAGTCAGATGTGAAATACCGAGGCTCAACCTCGGTGCTGCAT  
TTGAAACTCCCTGACTTTGAGGGTAGACGGAGAAAACGGAATTCCACGTGTAGCGGTGAA  
ATGCGTAGATATGTGGAAGAACCTGTGGCGAAAGCGGCTTTCTAGTTTATACCTGACG  
CTGAGGCGCGAAAGCAAGGGGAGCAAACAGGATTAGAAACCCTCGTAGTCC

>Otu30212

CCAGTATGGGGCGCTGCAGTGAGGAATCTTGCGCAATGGGGGCAACCCTGACGCAGCAAC  
GCCGCGTGAGTGAAGAAGGCCTTCGGGTGCTAAAGCTCTGTGCGGGTGGGAAGAAATGCAT  
GTGGGTTAATATCCTGCATGCTTGACGGTACCGCCAAAGGAAGCACCGGCTAACTCCGTG



CCAGCAGCCGCGGTAATACGGGGGGTGCAAGCGTTGTTTCGGAATTATTGGGCGTAAAGAG  
CGTGTAGGCGGCAAGATAAGTCAGATGTGAAAGCCCTGGGCTCAACTCAGGAAGTGCATT  
TGATACTGTCTAGCTTGAGTACTGGAGAGGGAAGAGGAATTCCTGGTGTAGAGGTGAAAT  
TCGTAGATATCAGGAGGAACACCGGTGGCGAAGGCGACTTCCTGGCCAGATACTGACGCT  
GAGACGCGAAAGCTAGGGTAGCAAACGGGATTAGATACCCCTCGTAGTCC

>Otu30215

CCAGCCTATGGGTTGCACCAAGTCGAGAATTTTTTCACAATGGGCGAAAGCCTGATGGAGCG  
ACGCCGCGTGGGGGATGAATGGCTTCGGCCCGTAAACCCCTGTCATTTGCGAACAAATTG  
GTTACCTAACACGTGAACCATTTGATAGTAGCGGAGAGGAAGCCCCGGCTAACTCTGTGC  
CAGCAGCCGCGGTAATACAGAGGGGGCGAGCGTTGTTTCGGAATTATTGGGCGTAAAGGGT  
GCGTAGGCGGTTTTGTAAAGTCTTGTGTGAAATCTTCAGGCTCAACTTGAAGACTGCACGA  
GAAACTGCAGGGCTTGAGTGTGGGAGAGGTGAGTGGAATTCCTGGCGTAGCGGTGAAATG  
CGTAGATATCAGGAGGAACACCTGTGGCGAAAGCGGCTCACTGGACCACAACCTGACGCTG  
ATGCACGAAAGCTAGGGGAGCAAACAGGATTAGATACCCCTGTAGTCC

>Otu30221

CCAGCCTACGGGGGGGCTGCAGTGGGGAATTTTGCACAATGGGGGAAACCCCTGATGCAGCA  
ACGCCGCGTGAGTGATGACGGCTTTTCGGGTTGTAAAGCTCTGTTCGCTGGGACAAAAGGC  
GCCATAATTAATATGTATGGCGAGTGATGGTACCAGGAGAGGAAGAGGCGGCTAACTCTG  
TGCCAGCAGCCGCGGTAATACAGAGGCCCTCAAGCGTTGTTTCGGAATTACTGGGCGTAAAG  
GGAATGTAGGTGGTGATGCAAGTCAGATGTGAAAGCCCTGGGCTTAACCCGGGAACCTGCA  
TTTGATACTGCGTTGCTCGAGTGCAGGAGAGGAAAGAGGAATTCCTGGTGTAGGGGTGAA  
ATCCGTAGATATCAGGAGGAATTCGATGGCGAAGGCATCTTTCTGGCCTGTAACCTGACA  
CTGAGATTCGAAAGCATGGGTAGCAAACAGGATTAGATACCCCTGGTAGTCC

>Otu30225

CCAGCCTACGGGGTGCAGCAGTAGGGAATATTGGTAATGGGCGCAAGCCTGAACCAGCAA  
CGCCGCGTGAGCGATGAAGGCCTTCGGGTTGTAAAGCTCTTTTTATGGGGACGAGGAAGG  
ACGGTACCCATAGAATAAGCCTCGGCTAACTACGTGCCAGCAGCCGCGGTAAAACGTAGG  
AGGCAAGCGTTATCCGGATTTACTGGGCGTAAAGCGCATGCAGGCGGTTTGGAAGTTGG  
ATGTGAAATCTCCCGGCTCAACTGGGAGGGGTGCTTCAAAACTACCGAACTTGAGGGCAT  
CAGAGGAAGGTGGAATTCGGGTGTAGTGGTGAAATGCGTAGATATCCGGAGGAACACCA  
GTGGCGGAGGCGGCCTTCTGGGATGCTCCTGACGCTCATAACGAAAGCTAGGGGAGCGA  
ACGGGATTAGAAACCCCTGTAGTCC

>Otu30230

CCAGCCTACGGGTCGCTGCAGTCGAGAATTTTTTCTCAATGGGCGAAAGCCTGAAGGAGCG  
ACGCCGCGTGGGGGATGAATGGCTTCGGCCCGTAAACCCCTGTCATTTGCGATCAACCGT  
TATTATTTAAAGATGATAACCTGATAGTAGCGGAAGAGGAAGGGACGGCTAACTCTGTG  
CCAGCAGCCGCGGTAATACAGAGGTCCCAAGCGTTGTTTCGATTCACTGGGCGTAAAGCG  
CGTGTAGGTGGCTTCGCGCGTCTTCTGTTAAAGCCCAGGGCCTAACCCTGGAAGTGCAGG  
AGATACGGCGGAGCTCGAGGAGGTAGAGGTGCATGGAACGCACGGTGTAGGGGTGAAAT  
CCGTTGATATCGTGCGGAATACCAAGGCGAAGGCATTGCACTGGGACCTTCCTGACACT  
GAGACGCGAAAGCGTGGGGAGCAAAAAGGATTAGAAACCCGCGTAGTCC

>Otu30245

CCAGCCTATGGGATGCAGCAGTCGAGAATTTTTTCTCAATGGGCGAAAGCCTGACGCAGCG  
ACGCCGCGTGTGCGATGAAGGTCTTCGGATCGTAAAGCACTGTGCCCCGGGACAAAGAAA  
ATGATGGTACCGGGAGAGGAAGCACCGGCTAACTCTGTGCCAGCAGCCGCGGTAATACAG  
AGGGTGCAGAGCGTTGTTTCGGAATTATTGGGCGTAAAGCGCTGGTAGGTGTTTTGTTAAGT  
CGCGTGTGAAAGCTCCAGGCTCAACCTGGAAAGTGCAGCGGAACTGGCGGACTTGAGTA  
CCGGAGAGGGTGCAGGAATTCGCGGTGTAGAGGTGAAATTCGTAGATATCGGGAGGAACA  
CCAGAGGCGAAGGCGGCGACCTGGAAGGCAACTGACACTGAGCAGCGAAAGCGTGGGGAG  
CAAACAGGATTAGAAACCCGTGTAGTCC

>Otu30278

CCAGCCTACGGGGGGCACCAGTGGGGAATATTGGACAATGGGGGAAACCCCTGATCCAGCG  
ACGCCGCGTGTGTGAAGAAGGCCTGCGGATTGTAAAGCACTTTTAGTGGGGATGAAATGT  
GCAGGGCTAATACCTCTGCATTTTGACCTAACCACAGAAAAAGCACCGGCTAACTCTGT  
GCCAGCAGCCGCGGTAATACAGAGGGTGCAAGCGTTAATCGGAATTACTGGGCGTAAAGC  
GTGCGCAGACGGTTACATAAGTCGGGTGTGAAAGCCCCGGGCTCAACCTGGGAATTGCAT  
TCGAGACTGCATGGCTAGAGTATCGAAGAGGGAAGTGGAATTTCCGGTGTAGCGGTGAAA  
TGCGTAGATATCGGAAGGAACACCAAGTGGCGAAAGCGACTTCCTGGTCAATACTGACGT

TCATGTGCGAAAAGCGTGGGGAGCAAACAGGATTAGATACCCGAGTAGTCC

>Otu30317

CCAGCCTATGGGTTGCAGCAGTGGGGAATATTGCGCAATGGGGGAAACCCTGACGCAGCA  
ACGCCGCGTGAGTGAGGAAGGCCTTAGGGTTGTAAAGCTCTTTCGGCCGGGAAGAAGGGA  
ATGAGTGCTAATAACATTTATTTTTGATGGTACCGGAAGAAGAAGCACCGGCAAACCTTCG  
TGCCAGCAGCCGCGGTAATACGAAGGGTGCAGCGTGTTCGGAATTATTGGGCGTAAAG  
GGTTCGTAGGCGGGAGAACAAGTCAAGTGTGAAATGTCCGGGCTTAACCTGGAGAGTGCA  
TTTGAAACTGTTTTCTTGAGCGTTGAAGAGGGTAGCGGAATTGCTGGTGTAGGAGTGAC  
ATCCGTAGAGATCAGCAGGAACAACGGAGGCGAAGGCGGCTACCTGGTCAATAACTGACG  
CTGAGGAACGAAAGCATGGGGAGCAAACAGGATTAGAAACCCTAGTAGTCC

>Otu30321

CCAGCCTATGGGGTGCTGCAGTGGGGAATCTTGACAAATGGAGGAAACTCTGATGCAGCG  
ACGCCGCGTGAGCGATGAAGCCCTTCGGGGTGTAAAGCTCTTTCGACGGGAACGATAATG  
ACGGTACCCGGAGAAGAAGCTGCGGCTAACTACGTGCCAGCAGCCGCGGTAATACGTAGG  
CAGCAAGCGTTGTTTCGGAATTACTGGGCGTAAAGCGCACGTAGGCGGCTTCTTAAGTCGG  
TGGTGAAATCCTGGAGCTCAACTCCAGAACTGCCTTCGATACTGGGAAGCTCGAGTCCGG  
GAGAGGTGAGTGGAAGTGCAGTGTAGAGGTGAAATTCGTAGATATTTCGCAAGAACACCA  
GTGGCGAAGGCGGCTCACTGGCCCGTTACTGACGCTGAGGCACGAAAGCGTGGGGAGCAA  
ACAGGATTAGAAACCCTTGTAGTCC

>Otu30326

GGACTACTGGGGTATCTAATCCCTTTTGCTCCCCACGCTTTCGTGCCTGAGTGTGAGCAA  
TTGTCCAGGTAGCCGCCTTCGCCCTCTGGTATTCCTCACGATATCTACGCATTTCACTGCT  
ACACCGTGAATCTTGCTACCCCTCCTCAATGCTCTAGCCATGTAGTTTGAGGTGCAATTCC  
GCTGTTGAGCAACGGGCTTTCACGCCTCACACACTTGGCCACCTGCGCACCCCTTTACGCC  
CAGTGAATCCGAATAACGCTTGCAGTCTCTGTATTACCGCGGCTGCTGGCACAGAGTTAG  
CCACTGCTTCCCTCTCCGGGTAAAGTCAGGCTTCAGTCTATTAAATTGAAGCGTTTCTTCC  
CCAGTGACAGAGGTTTACAATCCGAAGACCTTCATCCCTCACGCGGCGTCGCACCATCAG  
GCTTTCGCCCATTTGTGAATGATTCGAAACTGCTGCGACCCGTAGGCTGG

>Otu30361

CCAGCCTACGGGTGGCTCCAGTGGGGAATTTTGCGCAATGGGGGAAACCCTGACGCAGCA  
ACGCCGCGTGAGGATGAAGCTCCTTGAGTGTAAACTCCTTTCGACCGGGAAAATTATG  
ATGGTACCGGTGGAAGAAGCACCGGCTAACTCTGTGCCAGCAGCCGCGGTAATACAGAGG  
GGGCAAGCGTTGTTTCGGAATTATTGGGCGTAAAGGGTGCGTAGGCGGTGCGGTAAGTCTT  
CTGTGAAATCTCCGGGCTCAACTCGGAGTCTGCAGGAGAACTGCCGTGCTTGAGTATGG  
GAGAGGTGAGTGGAATTCCTGGTGTAGCGGTGAAATGCGTAGATATCAGGAGGAACACCT  
GCGGTGTAGACGGCTTCTTGACCACTACTGACGCTGAGGCACGAAAGCGTGGGGAGCAA  
ACAGGATTAGAAACCCGTGTAGTCC

>Otu30364

CAGCCTATGGGATGCTGCAGTGGGGAATTTTGACAAATGGGGGCAACCCTGATCCAGCAA  
TGCCGCGTGTGTGAAGAAGGCCTTCGGGTGTAAAGCTCTTTCGGCGGGGAAGAAATCGA  
CCTTTCTAATACAGAGGTTGGATGACGGTACCTGAAGAAGAAGCACCGGCTAACTACGTG  
CCAGCAGCCGCGGTAATACGTAGGGTGCGAGCGTTAATCGGAATTACTGGGCGTAAAGGG  
TGCGCAGGCGGCTCTATAAGACAGATGTGAAATCCCCGGGCTCAACCTGGGAAGTGCCTT  
TGTGACTGTAGGGCTAGAGTACGGCAGAGGGGGGTAGAATTCCACGTGTAGCAGTGAAAT  
GCGTAGAGATGTGGAGGAATACCGATGGCGAAGGCAGCCCCCTGGGTGATACTGACGCT  
CATGCACGAAAGCGTGGGGAGCAAACAGGATTAGAAACCCGCGTAGTCC

>Otu30420

CCAGCCTATGGGTTGCAGCAGTCGAGAATTTTTCTCAATGGGCGAAAGCCTGAAGGAGCG  
ACGCCGCGTGGGGGATGAAGGGCTTCGGCTCGTAAACCCCTGTCATTTGCGAACAAACCT  
TACAGTTTAACACACTGTGAGCTGATTGTAGCGAAAGAGGAAGGGACGGCTAACTCTGTG  
CCAGCAGCCGCGGTAATACAGAGGTCCCAAGCGTTGTTTCGGATTTACTGGGCGTAAAGGG  
TGCGTAGGTGGTTGGGTAAGTTTGATGTGAAATCTCCGGGCTTAACCCGGAAAATGCATT  
GAATACTATTACGCTTGAGGGTTGGAGGGGGGACTGGAATTCTCGGTGTAGCAGTGAAAT  
GCGTAGATATCGAGAGGAACACCAGTGGCGAAGGCGAGTCCCTAGACAACTCCTGACACT  
GAGGCACGAAAGCCAGGGGAGCAAACGGGATTAGAAACCCTGGTAGTCC

>Otu30425

CAGCCTATGGGGGGCACCAGTGGGGAATATTGGACAAATGGGCGCAAGACTGATCCAGCCA  
TGCCGCGTGAGTGACGAAGGCCTTGGGGTGTAAAGCTCTTTTGCGGGGAAGATAATGA

CGGTACCCGCGAGAATAAGCTCCGGCTAACTTCGTGCCAGCAGCCGCGGTAATACGAAGGG  
AGCTAGCGTTGTTTCGGAATCACTGGGCGTAAAGCGCATGCAGGTGGTTCGGTAAGTTGGA  
TGTGAAAGCTCCTGGCTCAACTGGGAGAGGTTCGTTCAATACTACCGGACTTGAGAGCAGT  
AGAGGAAGGTGGAATTCCCGGTGTAGTGGTGAAATGCGTAGATATCGGGAGGAACACCAG  
TGCGCAAAGCGGCCTTCTGGACTGTTTCTGACACTCATATGCGAAAGCTAGGGTAGCAAA  
CGGGATTAGATAACCCGCGTAGTCC

>Otu30430

CCAGCCTACGGGTCGCGAGCAGTGGGGAATCTTGCGCAATGGGCGCAAGCCTGATGGAGCG  
ACGCCGCGTGAGGGATGAATGGCTTCGGCCCGTAAACCCCTGTCATTTCGGGATCAATGCG  
GCTGACCTAACACGTCAGACGTTGATAGTACCGGAAGAGGAAGGGACGGCTAACTCTGTG  
CCAGCAGCCGCGGTAATACAGAGGTCCCAAGCGTTGTTTCGGATTCACTGGGCGTAAAGGG  
TGCGTAGGCGGCTGGGTAAGTCTGGCGTGAAATCTCCGAGCTTAACTCGGAAATGGCGTT  
GGATACTATCCGGCTAGAGGAATGGAAGGGAGACTGGAATTCTCGGTGTAGCAGTGAAAT  
GCGTAGATATCGAGAGGAACACCAGTGGCGAAGGCGAGTCTCTGGACATTTCCCTGACGCT  
GAGGCACGAAAGCCAGGGGAGCAAACGGGATTAGATAACCCGTGTAGTCC

>Otu30436

CCAGCCTACGGGAGGCAGCAGTGGGGAATATTGCACAATGGGGGAAACCCTGATGCAGCA  
ACGCCGCGTGAGTGACGAAGGCCTTCGGGTTGTAAAGCTCTGTCTTTGGGGACGATAATG  
ACGGTACCCAAGGAGGAAGCCACGGCTAACTACGTGCCAGCAGCCGCGGTAATACGTAGG  
TGGCAAGCGTTGTCCGGATTTACTGGGCGTAAAGGATGCGTAGGCGGACTTTTAAGTGGG  
ATGTGAAATTCCGAGGCTCAACCTCGGCGCTGCATTCCAGACTGGAAGTCTAGAGTGC GG  
GAGAGGAAAGTGGAATTCCTAGTGTAGCGGTGAAATGCGTAGAGATTAGGAAGAACACCA  
GTGGCGAAGGCGACTTTCTGGACCGTAACTGACGCTGATGCATGAAAGCGTGGGGAGCAA  
ACAGGATTAGAGACCCGAGTAGTCC

>Otu30451

CCAGCCTATGGGGGGCAGCAGTCGAGAATTTTTTCACAATGGGCGAAAGCCTGATGCAGCG  
ACGCCGCGTGAGGGATGACGGCCTTCGGGTTGTAAACCTCTTTCAGCAGGGACGAAGCGC  
AAGTGACGGTACCTGCAGAAGAAGCGCCGGCCAACTACGTGCCAGCAGCCGCGGTAAGAC  
GTAGGGCGCGAGCGTTGTCCGGATTTATTGGGCGTAAAGAGCTCGTAGGCGGCTTGTTCGC  
GTCGACTGTGAAAACCCGCGAGCTCAACTGCGGGCTTGCGAGCCGATACGGGCAGGCTAGAG  
TTCGGTAGGGGAGACTGGAATTCCTCGGTGTAGCGGTGAAATGCGCAGATATCAGGAGGAA  
CACCGGTGGCGAAGGCGGGTCTCTGGGCCGATACTGACGCTGAGGAGCGAAAGCGTGGGG  
AGCGAACAGGATTAGAGACCCCTTGTAGTTCC

>Otu30481

CCAGCCTATGGGGGGCAGCAGTAGGGAATATTGCACAATGGAGGAAACTCTGATGCAGCG  
ACGCCGCGTGAGTGATGAAGGACTTCGGTTCGTAAAGCTCTGTTGCAAGGGAAAAATAAA  
GTGATTGTACTTTGCGAGAAAGGATCGGCTAACTTCGTGCCAGCAGCCGCGGTAAGACGA  
GGGATCCTAGCGTTGTTTCGGAATCATTGGGCGTAAAGCGGGTGTAGGTGGCTTTGTAAAGT  
CAGGTGTGAAAGCCCCGGGGCTTAACCTCGGAAGTGCATTTGATACTGCGAAGCTTGAGTG  
TGGGAGAGATAAGTAGAATTCTTGGTGTAGTGGTGAAATACATAGATATCAGGAGGAATA  
CCGGAGGCGAAGGCGGCTTATTGGCCCAACACTGACACTCAGACCCGAAAGCGTGGGGAT  
CAAACAGGATTAGAAACCCCTAGTAGTCC

>Otu30484

CCAGCCTACGGGTCGCGAGCAGTGGGGAATCTTGCGCAATGGGCGAAAGCCTGACGCAGCC  
ATGCCGCGTGAAATGATGAAGGTCTTAGGATTGTAAATTCCTTTCACCGGGGACGATAATG  
ACGGTACCCGGAGAAGAAGCCCCGGCTAACTTCGTGCCAGCAGCCGCGGTAATACGAAGG  
GGGCTAGCGTTGCTCGGAATTACTGGGCGTAAAGGGAGCGTAGGCGGGTCGTTAAGTTGG  
GGGTGAAAGCCCCGAGCTCAACTTCGGAATTGCCTTTGATACTGTCTATCTTCGAGTTCG  
GGAGAGGTTGGCGGAATTCTTAGTGTAGAGGTGAAATTCGTAGATATTAGGAAGAACACC  
AGTGGCGAAGGCGGCCAACTGGCCCGATACTGACGCTCATGTGCGAAAGCGTGGGGAGCA  
AACAGGATTAGAGACCCGCGTAGTCC

>Otu30490

CCAGCCTACGGGTGGCTCCAGTGGGGAATATTGGACAATGGGCGAAAGCCTGATCCAGCA  
ATGCCGCGTGAGTGATGAAGGCCTTAGGGTCGTAAAGCTCTTTTACCCGGGATGATAATG  
ACAGTACCGGGGAGAATAAGCCCCGGCTAACTCCGTGCCAGCAGCCGCGGTAATACGGAGG  
GGGCTAGCGTTGTTTCGGAATTACTGGGCGTAAAGCGCACGTAGGCGGCTATTCAAGTCAG  
AGGTGAAAGCCCCGGGGCTCAACCCCGGAACCTGCCTTTGAAACTAGGTAGCTAGAATCTTG  
GAGAGGTCAGTGGAATTCAGAGTGTAGAGGTGAAATTCGTAGATATTTCGGAAGAACACCA

GTGGCGAAGGCGACTACCTGGTCTGGCATTGACGCTCATGTGCGAAAGCGTGGGGAGCAA  
ACAGGATTAGAAACCCCTCGTACC  
>Otu30513  
CCAGCCTATGGGTGGCAGCAGCTAAGAATATTCCGCAATGGGAGAAATCCTGACGGAGCG  
ACGCCGCGTGGAAGATGAAGGCCGAAAGGTTGTAAATTCCTTTTACACGGGAAGAATAAG  
TGTATTGAGAGAAACGGTGCATGATGACAGTACCCGGGGAATAAGTCTCGGCTAACTACG  
TGCCAGCAGCCGCGGTAACACGTAGGAGACGAGCGTTATCCGGATTTACTGGGCGTAAAG  
CGCGTGCAGGCGGTTTGGTAAGTTGGATGTGAAAGCTCCCGGCTTAACTGGGAGAGGTCTG  
TTCAATACTGCCAGACTAGAGGATGGTAGAGGGAGGTGGAATTCTGGGTGTAGTGGTGAA  
ATGCGTAGATATCCAGAGGAACACCAGTGGCGAAAGCGGCCTCCTGGACCATTTCTGACG  
CTCATACGCGAAAGCTAGGGTAGCAAACGGGATTAGAAACCCCTGTAGTCC  
>Otu30590  
CCAGCCTACGGGGCGCACCAGTAACGAATCTTCCGCAATGCACGAAAGTGTGACGGAGCG  
ACGCCGCGTGAGGAGACGAAGTTCTTCGGAATGTAAACTCCTGTCAGGGGTAAAGAAAGTTC  
TGATCTACCCAGAGGAAGGCACGGCTAACTCTGTGCCAGCAGCCGCGGTAATACAGAGG  
TGCCAAGCGTTAGGCGGAATCACTGGGCTTAAAGCGTGTGTAGGTGGAGATCTAAGTACC  
TTGTGAAATCCCACGGCTCAACCGTGGAACTGCTGGGTATACTGGGTCTCTTGAGCCAAC  
TAGGGGCGAGCGGAACAAATGGTGGAGCGGTGAAATGCGTAGATATCATTTGGAACGCCA  
ATGGTGAAAACAGCTCGCTGGGGTTGTGCTGACACTGAGACACGAAAGCCAGGGGAGCGA  
ACGGGATTAGAACCCCGTAGTCC  
>Otu30599  
CCAGCCTATGGGTTGCTGCAGTCGAGAATTTTTTCACAATGGGGGAAACCCGTATGGAGCG  
ACGCCGCGTGAGGATGAAGGTCCTTCGGATTGTAAACTCCTGTCATGAGAGAACAAACCT  
GTGGGTTTAACTGACCCGCAGTTGATAGTATCTCAAGAGGAAGAGACGGCTAACTCTGTG  
CCAGCAGCCGCGGTAATACAGAGGTCTCAAGCGTTGTTTCGGATTTCATTGGGCGTAAAGGG  
TGCGTAGGTGGTATTGCAAGTCGGATGTGAAATCTTGGGGCTCAACCCCAAACTGCATT  
CGATACTGCGGTGCTCGAGGACTGGAGAGGAGACTGGAATTCACGGTGTAGCAGTGAAAT  
GCGTAGATATCGTGAGGAAGGCCAGTGGCGAAGGCGGGTCTCTGGACAGTTCCTGACACT  
GAGGCACGAAGGCCAGGGGAGCAAACGGGATTAGAAACCCCGGTAGTCC  
>Otu30605  
CCAGCCTATGGGAGGCACCAGTAGGGAATATTGCACAATGGGCGAAAGCCTGATGCAGCA  
ACGCCGCGTGATGATGAAGGCCTTCGGGTTGTAAATCCTGTAGAGGGGGAAGAAGGGT  
GCCGCAAGGCATTTGACAGTACTCCTAAAGTAAGCTACGGCAAACCTCTGTGCCAGCAGCC  
GCGGTAATACAGAGGTAGCAAGCGTTGTTTCGGAATGACTGGGTGTAAAGCGCGTGTAGGC  
TGTTTTGTAAAGTTGAATGTGAAATCCCCAAGCTTAACTTGGGAACGGCATTCAAACTGC  
ATAACTTGAGTGCGGAGGAGGAAAGTGAATTTTCGGGTGTAGCGGTGAAATGCGTAGATA  
TCCGAAGGAACACCGGTGGCGAAGGCGACTTTCTGGTCCGCAACTGACGCTGAGACGCGA  
AAGCTAGGGGAGCAAACAGGATTAGAGACCCCTGTAGTCC  
>Otu30619  
CCAGCCTATGGGTGGCACCAGTGGGGAATCTTGCGCAATGGGCGAAAGCCTGACGCAGCA  
ACGCCGCGTGAGGATGAAGGCCCTTGGGTTGTAAACTCCTGTCGGCTGGGAAGAAATCG  
ATCGTGGCTCATACCCACGGTCGTTGACTGTACCAGCAAAGGAGGCCCGGGCTAACTCTG  
TGCCAGCAGCCGCGGTAATACAGAGGGGGCTAGCGTTATTCGGAATTATTGGGCGTAAAG  
GGCGCTAGGCGGCCATGCGTGTCTTCCGTGAAATCCCTCGGCTTAACTGAGGACGTGCG  
GAAGAACTGCAAGGCTCGAGTCCGGGAGAGGGGGTGAATTCCCAGTGTAGCGGTGAA  
ATGCGTAGATATTGGGAGGAACACCGGTGGCGAAGGCGGCCCTTGACCGGTACTGACG  
CTGAGGCGGAAAGCGTGGGTAGCAAACGGGATTAGATACCCAGTAGTCC  
>Otu30620  
CCAGCCTATGGGTGCGCAGCAGTCGAGAATATTCCACAATGGGCGAAAGCCTGATGGAGCG  
ACGCCGCGTGAGGAAGAAGCCCTTCGGGGTGTAAACTGCTTTTCTATAAGAAAACTTT  
TGTGATTGTACTATGGGAATAAGGGGCCGCAAACCTTCGTGCCAGCAGCCGCGGTAATACG  
AAGGCCCCAAGCGTTATCCGGATTTATTGGGCGTAAAGCGTGCCTAGGAGGTTTAGTGAG  
TCTGTTGTTAAATTTTCGTTGCTTAACGACGGAGCTGCAACAGATACTACTAGACTAGAGT  
GTGTGAGAGGCTAATAGAACTCACGGTGTAGGGGTGAAATCCGTTGATATCGTGGGGAAT  
ACCAAAGGCGAAGGCATTTAGCTAGCGCATTTACTGACTCTAAGGCACGAAAGCGTGGGGA  
GCAAAAAGGATTAGAGACCCCCGTAGTCC  
>Otu30647  
CCAGCCTACGGGGTGCACCAGCTAAGAATCTTCCGCAATGGGGGAAACCCGTACGGAGCG

ACGCCGCGTGGATGATGAAGGCCGTAAGGTTGTAAAGTTCTTTTCTTTGTGAGGAATAAG  
CGTGAGAGGAAAATGCTCACGTGATGACGTAAGCGAAGGAATAAGCCCCGGCTAATTACGT  
GCCAGCAGCCGCGGTAATACGTATGGGGCGAGCGTTGTTTCGGATTTCATTGGGCGTAAAGG  
GCGTGTAGGCGGCTTGGCAAGCTTGGTGTGAAATGTCACGGCTTAACCGTGAATGTGCGC  
TGAGAACTGCCAGGCTGGAGTTTTTGGGGGGGAAGCTGGAATTCCTGGTGTAGGGGTGAAA  
TCTGTAGGTATCAGGAAGAACACCAATGGCGAAGGCAAGCTTCTATCCAAAGACTGACGC  
TGAGGCGCGAAAAGTGTGGGGAGCGAACAGGATTAGATAACCCGAGTAGTCC

>Otu30660

CCAGCCTACGGGGTGCTGCAGTGGGGAATATTGCACAATGGGCGCAAGCCTGATGCAGCC  
ATGCCGCGTGTGTGAAGAAGGCCTTCGGGTGTAAAGCACTTTCAGCGAGGAGGAAGGGT  
ATCGTGTTAATAGCACGGTACATTGACGTTACCCGCAGAATAAGCACCGGCTAACTCCGT  
GCCAGCAGCCGCGGTAATACGGAGGGTGCGAGCGTTAATCGGAATTACTGGGCGTAAAGC  
GTGCGTAGGCGGTTTCGGTCAGTCAGCCGTGAAAGCCCCGGGCTCAACCTGGGAACGGCGG  
TTGAGACGGCCGGACTGGAGTGGGCTAGAGGATCGTGGAATCCCGGTGTAGCGGTGAAA  
TGCGTAGAGATCGGGAAGAACACCGATGGCGAAGGCAGCGATCTGGGGCCACACTGACGC  
TGAGGCACGACAGCGTGGGGAGCAAACAGGATTAGATAACCCGTGTAGTCC

>Otu30703

CCAGCCTATGGGGCGCTCCAGTAGGGAATATTGCGCAATGGAGGAAACTCTGACGCAGCG  
ACGCCGCGTGGGTGACGAAGGCCTTCGGGTCTGTAAAGCCCTGTCGGAAGGGAAGAAAAAC  
GGTATGGCTAACATCCATGCCGCTTGACGGTACCTTCAAAGGAAGCACCGGCTAACTACG  
TGCCAGCAGCCGCGGTAATACGTAGGGTGCAAGCGTTGTTTCGGAATCATTTGGGCGTAAAG  
CGCGTGTAGGTGGTTAGGTAAGTCAGGTGTGAAAGCCCTCGGCTCGACCGAGGAAGTGCA  
TTTGAAACTACCTAGCTAGAGGACGGTAGAGGAAGGTGGAATTCCTAGTGTGAGGTGAAA  
TTCGTAGATATTAGGAGGAATACCGGTGGCGAAGGCGGCCTTCTGGGCCGTTTCCTGACAC  
TGAGACGCGAAAAGCGTGGGTAGCAAACAGGATTAGAGACCCCTGTAGTCC

>Otu30704

CCAGCCTACGGGGCGCACCCAGTGGGGAATCTTGCGCAATGGACGAAAAGTCTGACGCAGCC  
ACGCCGCGTGAGTGAAGAAGGCCTTCGGGTGTAAAGCTCTGTTCGGAGGGGACAAAAACG  
TTCATAGTTAATAGCTATGGATCTTGATGGTACCCTCAAAGGAAGCACCGGCTAACTTCG  
TGCCAGCAGCCGCGGTAATACGAAGGGTGCAAGCGTTGCTTCGGAATTATTGGGCGTAAAG  
GGTAGGTAGGTGGTGATACAAGTCTGAGGTGAAATCCCTGAGCTCAACTCAGGACGTGCC  
TTGGAAACTGTATCACTAGAGTACTAGAGAGGTTTCGTGGAATTCCTGGTGTAGCGGTGAA  
ATGCGTAGAGATCAGGAGGAACATCAGCGGCGAAGGCGACGAACTGGATAGTAACTGACA  
CTCAACTACGAAAGCGTGGGTAGCAAACAGGATTAGATAACCCCTGTAGTCC

>Otu30716

CCAGCCTATGGGGGGCTCCAGTCGAGAATTTTTCTCAATGGGCGAAAGCCTGAAGGAGCG  
ACGCCGCGTGGGGGATGAATGGCTTCGGCCCGTAAACCCCTGTCATTTGCGAACAAATTG  
TTTCATTTAATGCCTGAAGCATTGATTGTAGTAGAAGAGGAAGGGACGGCTAACTCTGTG  
CCAGCAGCCGCGGTAATACAGAGGTCCCAAGCGTTGTTTCGGATTCACTGGGCGTAAAGGG  
TGCGTAGGCGGTTAGGTAAGTCTGTTGTGAAATCTCCGAGCTTAACTCGGAAACTGCAGT  
GGATACTATCTAGCTCGAGGAATGGAGGGGAGACTGGAATACTTGGTGTAGCAGTGAAAT  
GCGTAGATATCAAGTGGAACACCAGTGGCGAAGGCGAGTCTCTGGACAATTCCTGACGCT  
GAGGCACGAAAGCCAGGGGAGCAAACGGGATTAGAAACCCCTCGAAGTCC

>Otu30735

CCAGCCTATGGGTCGCTGCAGTGGGGAATTTTGACAATGGGGGCAACCCTGATCCAGCA  
ATGCCGCGTGTGTGAAGAAGGCCTTCGGGTGTAAAGCACTTTTGTGAGGAACGAAACGG  
CTCTGGTTAATACCTGGGGCTAATGACGGTACCTGAAGAATAAGCACCGGCTAACTCCGT  
GCCAGCAGCCGCGGTAATACGGAGGGTGCAAGCGTTATCCGGATTCACTGGGTTTAAAGG  
GTGCGTAGGTGGGCAGGTAAGTCAGTGGTGAAATCTCTGGGCTTAACCCAGAACTGCCG  
TTGATACTATCTGTCTTGAATGTAGTGGAGGTGAGCGGAATATGTCATGTAGCGGTGAAA  
TGCTTAGATATGACATAGAACATCTATTGCGAAGGCAGCTCGCTACACTATTATTGACAC  
TGAGGCACGAAAGCGTGGGGATCAAACAGGATTAGAAACCCGCGTAGTCC

>Otu30736

CCAGCCTACGGGAGGCACCAGTTGGGAATCTTGGAACAATGGGGGAAACCCCTGATCCAGCC  
ACGCCGCGTGGAGGATGAAGGTCTTCGGATCGTAAACTCCTGTCATGAGGGAACAAACCT  
GCACGTTTTAACTGATGTGCAGCTGATAGTACCTCAAGAGGAAGAGACGGCTAACTCTGTG  
CCAGCAGCCGCGGTAATACAGAGGTCTCAAGCGTTGTTTCGGATTTCATTGGGCGTAAAGGG  
TGCGTAGGCGGCGAGGTTAGTCAGGTGTGAAATCCCGGAGCTTAACTCCGGAACCTGCACT

TGATACTGCCTTGCTTGAGGACTGGAGAGGAGATCGGAATTCACGGTGTAGCAGTGAAT  
GCGTAGATATCGTGAGGAAGGCCAGTGGCGAAGGCGGATCTCTGGACAGTTCTTGACGCT  
GAGGCACGAAGGCCAGGGGAGCAAACGGGATTAGATACCCTTGTAAGTCC

>Otu30739

CCAGCCCTACGGGACGCACCAGTGGGGAATATTGGACAATGGGGGAAACCCTGATCCAGC  
GACGCCGCGTGTGTGAAGAAGGCCTGCGGGTTGTAAAGCACTTTTAGTGGGGACAAAAAG  
CTACGGATTAATACTTCGTGGTCTTGATTTAACCCAAAGAAAAAGCACCGGCTAACTACG  
TGCCAGCAGCCGCGGTAATACGTAGGGTGCAAGCGTTATCCGGAATTATTGGGCGTAAAG  
AGCTCGTAGGCGGTTTGTGCGCTCTGCTGTGAAACTGGAGGCTCAACCTCCAGCCTGCA  
GTGGGTACGGGCAGACTAGAGTGCGGTAGGGGAGATTGGAATTCCTGGTGTAGCGGTGGA  
ATGCGCAGATATCAGGAGGAACACCGATGGCGAAGGCAGATCTCTGGGCCGTAAGTACG  
CTGAGGAGCGAAAGCATGGGGAGCGAACAGGATTAGAGACCCTAGTAGTCC

>Otu30746

CCAGCCTATGGGGGGCAGCAGTGGGGAATATTGGACAATGGGCGCAAGCCTGATCCAGCA  
ATGCCGCGTGGGTGAAGAAGGTCTTCGGATTGTAAAGCCCTTTTCGGCGGGGACGATGATG  
ACGGTACCCCGCAGAAGGAGCCCCGGCTAACTTCGTGCCAGCATCCGCGGTAATACGAAGG  
GGGCTAGCGTTGCTCGGAATGACTGGGCGTAAAGGGCGCGTAGGCGGTTTCGGACAGTTGG  
GCGTGAAATTCCTGGGCTTAACCCGGGGGCTGCGCTTGATACATCTGGACTAGAGTGGGG  
AAGAGGGTCGTGGAATTCACAGTGTAGAGGTGAAATTCGTAGATATTGGGAAGAACACCG  
GTGGCGAAGGCGGCGACCTGGTCCTTGACTGACGCTGAGGCGCGAAAGCGTGGGGAGCAA  
ACGGGATTAGATACCCCCGTAGTCC

>Otu30765

CCAGCCTACGGGGGGCAGCAGTCGAGAATCTTCGCAATGGACGCAAGTCTGACGGAGCG  
ACGCCGCGTGATGGATGAAGTCTTTCGGGATGTAAACATCTTTTATGAGCGAGAGAGTTT  
ATTGATCAGCTCATGAATAAGGGGTGCTAAACTCGTGCCAGCAGCAGCGGTAATACGAG  
TGCCCCGAGCGTTATCCGGAATCATTGGGCGTAAAGGGTGTGTAGGCGGTTGCGTTAGTC  
TCTTGTCAAATCTCCCGACTTAATCGGGAACCTGCAAGAGATACGGCGCACCTAGAAGAT  
GCGAGGGGTTTGCGGAACCTCATGGTGTAGGGGTGAAATCCGTTGATATCATGGGGAGCAC  
CAAAGCGAAGGCAGCAAACCTAGCGCATTCTTGACGCTGAAACACGAAAGCGTGGGTAGC  
AAACAGGATTAGAGACCCCTGTAGTCC

>Otu30767

CCAGCCTATGGGGGGCAGCAGCCGAGAATATTCGACAATGGGCGCAAGCCTGATCGAGCG  
ATACCGCGTGATGGATGAAGCGCTTCGGCGTGTAACATCTTTTATGGAGGAAGAAATAA  
TTGACATTACTTCATGAATAAGGGGCTCCTAACTCTGTGCCAGCAGGAGCGGTAATACAG  
AGGCCCCAAGCATTACCCGGAATCACTGGGCGTAAAGGGTGTGTAGGTGGTTCGTATTAGT  
CGTTCGTAAAAAACAGGGCTCAACCCTGGAGATGCGAGCGAAACGGTACGACTCGAGGG  
AGTGAGAGGTGAATGGAACCTGGGTGTAGGGGTGAAATCCGTTGATATCCAGGGGAACA  
CCGAAAGCGAAGGCAATTCCTGACACTGAAACACGAAAGCGTGGGTAG  
CGAACGGGATTAGAAACCCGAGTAGTCC

>Otu30775

CCAGCCTACGGGTGGCTCCAGTTAGGAATTTTTCGCAATGGGCGAAAGCCTGACGCAGCA  
ACGCCGCGTGAGGGATGAAGGCCTTAGGGTTGTAAACCTCTTTCAGTTGGGAAAAAACAA  
ATGATGGTACCAAAAGAAGAAGCACCGGCTAACTACGTGCCAGCAGCCGCGGTAATACGT  
AGGGTGCAAGCGTTATTTCGGAATTATTGGGCGTAAAGCGCATGTAGGCGGTTTTGTAGT  
CTGATGTGAAATCCCTGGACTCAATCCAGGAAGTGCATTGGATACTGCAAACTAGAGTA  
TAAGAGAGGTGGACGGAATTCCTGGTGTAGAGGTGAAATTCGTAGATATCAGGAGGAACA  
ACAGAGGCGAAGGCGGTTCACTGGATTATAACTGACGCTGAGATGCGAAAGTGTGGGGAG  
CAAACAGGATTAGAAACCCTCGTAGTCC

>Otu30782

CCAGCCTACGGGGTGCTGCAGTCGAGAATTTTCTCAATGGGGGAAACCCTGAAGGAGCG  
ACGCCGCGTGAGGGATGAATGGCTTCGGCCCGTAAACCCTGTCAATTTGCGAGCAAATTA  
TTTCAGCTAACAAAGTGAGATATTGATTGTAGCAGAAGAGGAAGGGACGGCTAACTCTGTG  
CCAGCAGCCGCGGTAATACAGAGGTCCCAAGCGTTGTTTCGGATTCACTGGGCGTAAAGGG  
TGCGTAGGTGGCAGGGTAAGTCTGATGTGAAATCTCCGAGCCTAACTCGGAAACTGCATC  
GGATACTATCCCGCTCGAGGAGTGGAGGGGAGACTGGAATACTTGGTGTAGCAGTGAAT  
GCGTAGATATCAAGTGGAACACCAAGTGGCGAAGGCGAGTCTCTGGACAACTTCTGACACT  
GAGGCACGAAAGCTAGGGGAGCAAACAGGATTAGATACCCGTGTAGTCC

>Otu30789

CCAGCCTACGGGGGGCTGCAGTCGAGAATCTTTCGCAATGGGCGCAAAGCCTGACGAAGCG  
ACGCCGTGTGAGCGAAGAAGGCCCTTCGGGTGTAAAGCTCTTTCGCTAGGGAACAAGAGA  
GTTTGGTTAATAACCAGATGATTTGATGGTACTTGGTAAAGAAGCACCGGCTAACTCCGT  
GCCAGCAGCTGCGGTAATACGGAGGGTGCAAGCATTGATCGGATTGACTGGGCGTAAAGG  
GCGCGTAGGCGGTTTTAAAAAGTCTGATGTGAAATTCCGGGGCTCAACCCCGGAGCTGCAT  
TTTAAACTTTTAGACTAGAGGACGGTAAGGGAAAACAGAATTCACGTGTAGCGGTGAAA  
TGCGTAGATATGTGGAAGAATACCGGTGGTGAAGACGGTTTTCTGTGCCGAACCTGACGC  
TGAGGCGCGAGAGCTAGGGGAGCAAACAGGATTAGATAACCCGTGTAGTCC

>Otu30847

CCAGCCTATGGGAGGCAGCAGTGGGGAATTTTACGCAATGGGCGAAAGCCTGACGTAGCG  
ACACCGCGTGAGCGAAGAAGCCCTTTGGGGTGTAAAGCTCTGTCAGCTGGAACGAAAAAA  
ATGACGGTACCAGCAGAGGAAGCATCGGCTAACTACGTGCCAGCAGCCGCGGTAAGACGT  
AGGATGCGAGCGTTGTCCGGATTTATTGGGCGTAAAGAGTTCGTAGGTGGTTTGTAAAGT  
CTGATGTTAAAGATTGGGGCTCAACCCTGAAAATGCATTGGATACTGGCAGACTTGAGTG  
TGGTAGAGGCTAGTGGAATTTCCAGTGTAGCGGTGAAATGCGTAGATGTCAGGAGGAACA  
CCTGTGGCGAAAGCGGCTCACTGGACCATAACTGACGCTGATGCACGAAAGCTAGGGGAG  
CAAACAGGATTAGAAACCCCGTAGTCC

>Otu30859

CCAGCCTATGGGTGCGAGCAGTAAGGAATATTGGTCAATGGACGAAAGTCTGAACCAGCC  
ATGCCGCGTGAGGATGACGGCCCTACGGGTGTAAACTTCTTTTGTACGGGAAAAAACC  
CTCGTTCGTGAACCGGGGCTGATGGTACCGTAAGAATAAGCATCGGCTAACTCCGTGCCA  
GCAGCCGCGGTAATACGGAGGATGCAAGCGTTATCCGGATTCATTGGGTTTAAAGGGTGC  
GCAGGCGGAATAATAAGTCAGTGGTGAATCTCGTCGCTTAACGACGAACGTGCCATTGA  
TACTGTAGGTCTTGAGTACAGATGCCGTTGGCGGAATGTGTCATGTAGCGGTGAAATGCA  
TAGATATGACACAGAACACCGATTGCGAAGGCAGCTGACGAAACTGTAACGTACGCTGAG  
GCACGAAAGCGTGGGGATCAAACAGGATTAGATAACCCGAGTAGTCC

>Otu30866

CCAGCCTACGGGTGGCAGCAGTCGAGAATTTTTCTCAATGGGCGAAAGCTTGAAGGAGCG  
ACGCCGCGTGGGTGATGAAGGTCTTCGGACTGTAAACCCCTGTCGTCAGGGACGAGGGTG  
CCTACGTTAATAGCGTGGGTGCTTGACGGTACCTGGAGAGGAAGCCCCGGCTAACTCTGT  
GCCAGCAGCCGCGGTAATACAGAGGGGGCAAGCGTTATTCGGAATTATTGGGCGTAAAGG  
GCGCGTAGGCGGTTTTTTTAAAGTCAGATGTGTAATCCCCGAGCTCAACTTGGGAACGTGCAT  
CTGAGACTGGAAGGCTAGAGTACTGGAGAGGGTGGTGGAATTCCTCGTGTAGCGGTGAAA  
TGCGTAGAGATGAGGAGGAACACCAAGTGGCGAAGGCGGCCACCTGGACAGTAACGTACGC  
TGAGGCGCGAAAGTGTGGGTAGCAAACAGGATTAGATAACCCGCGTAGTCC

>Otu30873

CCAGCCTACGGGGTGCAGCAGTCGCGAAACTTTTGACAATGCGCGAAAGCGCGATCAGGGA  
ACTCTGAGTGCCAACCTAACGGTTGGCTTTTTATCAGCTTGAATAGCTGGTGGAATAAGG  
GCTGGGTAAGTCTCGTGCCAGCCGCCGCGGTAACACGAGCAGCCGAGTGGTGCCACGA  
ATATTGAGTCTAAAACGCGTGTAGCCGGCTTGTTAAGTTCCCCGTGAAATCTCTCGGCTC  
AACCAGAGAGGCGTGCGGGGAATACTAGCAGGCTAGGGAATGGAAGAGGCCAAGGGTACTG  
TAAGGGGAGGAGTAAATCCTGTAATCCTTGACAGGACCATCGGTGGCGAAGGCGCTTGGC  
CAAGACATGTCCGACGGTGAGATGCGAAGCCTAGGGGAGCAAATCGGATTAGAACCCCCG  
TAGTCC

>Otu30874

CCAGCCTATGGGTGGCACCAGTCGAGAATCTTCCACAATGGACGAAAGTCTGATGGAGCG  
ACGCCGCGTGATTGATGAAGTCCCTCTGGGACGTAAAGATCTTTTATGAGGGAAGAAGTT  
TATTGACTGTACCTCATGAATAAGAGGCTCCTAATCTCGTGCCAGCAGGAGCGGTAATAC  
GAGAGCCTCGAGCGTTATCCGGAATTATTGGGCGTAAAGGGTGCGTAGGTTGTTGTATTA  
GTCTTTTGTAAAGACCTGGGCTTAACCTGGGGATTGCGAAAGAAACGGTACTAACTTGA  
AAGTGCGAGAGGTGAATGGAACCTCATGGTGTAGGGGTGAAATCCGTTGATATCATGGGGA  
ACACCAAATGCGAAGGCAATTCCTGGCGCATATTTGACACTGAGGCACGAAAGCGTGGG  
GAGCAAACAGGATTAGATAACCCGCGTAGTCC

>Otu30887

CCAGCCTATGGGATGCAGCAGCTAAGAATCTTCCGCAATGGACGAAAGTCTGACGGAGCG  
ACGTGCGGTGGGTGATGAAGGCGGAAACGTTGTAAACCCCTTTTCTGGACGAGGAATAAG  
CTTTGGAGGGAATGCCAGAGTGATGACGGTAGTTCAGGAATAAGCCCCGGCTAATTACGT  
GCCAGCAGCCGCGGTAACACGTATGGGGCGAGCGTTGTTCCGGAATTATTGGGCGTAAAGG

GCGAGCAGGCGGTTATGCAAGTCTGACGTGAAATATCTAGGCTTAACCTGGAAAACGCGT  
TGGAACCTGTGTGACTAGAGTTCTGGAGGGGAAGCTGGAATTCAGGTGTAGGGGTGAAA  
TCTGTAGATATCTGGGAGAACATCAGTGGCGAAGGCGAGCTTCTGGCCAAGAAGTACGCG  
TGAGACGCGAAAGCGTGGGGAACAAACAGTATTAGAGACCCCCGTAGTCC

>Otu30911

CCAGCCTATGGGGCGCAGCAGTCGAGAATTTTTCTCAATGGGCGAAAGCCTGAAGGAGCG  
ACGCCGCGTGGGGGATGAATGGCTTCGGCCATAAACCCTGTCATTCACGATCAAACCT  
TGCTATTTAAAAGATGGCAAGCTGATAGTAGCGGAAGAGGAAGGGACGGCTAACTCTGTG  
CCAGCAGCCGCGGTAATACAGGGGTCCCAAGCGTTGTTTCGGATTCACTGGGCGTAAAGGG  
TGCGTAGGTGGTAGAGTAAGTCGGACGTGAAAGCTCGGAGCTCAACTCCGAAATGGCGTT  
GGAAACTGCTCTGCTAGAGGGTCGGAGGGGGGACTGGAATTCTCGGTGTAGCAGTGAAAT  
GCGTAGATATCGAGAGGAACACCAGTGGCGAAGGCGAGTCCCTGGACGACTCCTGACGCT  
GAGGCACGAAAGCCAGGGGAGCAAACGGGATTAGAGACCCCCGTAGTCC

>Otu30916

CCAGCCTATGGGTCGCACCAGGTGCGCACGCTGGAACTTTCCAACGTCGATCTCAGCAAC  
GAATTTTCCAACTCATCACCACGCAACGCGCCTTCCAGGCCGGCTCGCGCATCATCACG  
GTCTCCGACACGGTGCTTGGGGATGTCATCAACCTGAAACGGCAATGAGCGAAGCAGCCC  
CCGAAACAGCAGCGCCGGCGGCTCCGGCAAAAGCGCCCAACCCGTGGATCCCGATCCTCG  
CGGTTGCCGTCTCATGCCGGTGATTTTCAATTTGCGATGACGCAATACGTTTTGATTCCCA  
AAATCAAACCCGCAATTCGCCGAGGGCGAAATCAAACGGCAACTTCCGGGAAAGCCGGGG  
AAAAAGATGGCGGGAAAGGCAAGTCGGCGGAAGCCGGCGGGAAAAAAGACGGCGACGGAA  
AATCGGCGGCATACCTCGTACGAATTAGAAACCCGAGTAGTCC

>Otu30918

CCAGCCTATGGGGGGCACCAGTGGGGAATATTGGACAATGGGCGCAAGCCTGATCCAGCC  
ATGCCGCGTGAGTGAAGAAGGCCCTTGGGTTGTAAAGCTCTTTTGGCGGGGACGATAATG  
ACGGTACCCGCGAGAATAAGCCCCGGCTAACTTCGTGCCAGCAGCCGCGGTAATACGAAGG  
GGGCTAGCGTTGTTTCGGGTTTACTGGGCGTAAAGCGCACGTAGGCGGATCTTTAAGTCAG  
GGGTGAAATGCCGAGGCTCAACTTCGGAACGCTTTTGATACTAGAGATCTTGAGTTCGG  
GAGAGGTGAGTGGAACGTCGAGTGTAGAGGTGAAATTCGTAGATATTAGCAAGAACACCA  
GTGGCGAAGGCGGCTCACTGGACCGGTACTGACGCTGAGGAGCGAAAGCGTGGGGAGCAA  
ACAGGATTAGAGACCCGCGTAGTCC

>Otu30984

CCAGCCTATGGGTCGCTGCAGTAAGGAATATTGGTCAATGGAGGCAACTCTGAACCAGCC  
ATGCCGCGTGACAGGACGACGGCCCTATGGGTTGTAAAGCTCTTTTGTACGGGAAGAAACA  
CTCCAACGTGTTGGAGCTTGACGGTACCGTAAGAATAAGGATCGGCTAACTCCGTGCCAG  
CAGCCGCGGTAATACGGAGGATCCAAGCGTTATCCGGAATCATTGGGTTTAAAGGGTCCG  
TAGGCGGCCCTGTAAGTCAGTGGTGAAATCTTTCGGCTCAACCGGAAAATTGCCATTGAT  
ACTGCAGGGCTTGAATTATTGGGAAGTAACTAGAATATGTAGTGTAGCGGTGAAATGCTT  
AGAGATTACATGGAATACCGATTGCGAAGGCAGGTTACTATCAATATATTGACGCTGATG  
GACGAAAGCGTGGGGAGCGAACAGGATTAGAGACCCCCGTAGTCC

>Otu30997

CCCAGCCTATGGGGTGCTGCAGTGGGGAATATTGGACAATGGGGGAAACCCTGATCCAGC  
AATGCCGCGTGAGTGATGAAGGCCCTTAGGGTTGTAAAGCTCTTTTCGGGTGGGACGATGAT  
GACGGTACCACCAGAAGAAGCCCCGGCTAACTTCGTGCCAGCAGCCGCGGTAATACGAAG  
GGGGCTAGCGTTGTTTCGGAATTACTGGGCGTAAAGCGCACGCAGGCGGCTCGTTAAATTA  
GAAGTGAAAGCCCTGGGCTCAACCTGGGAATTGCTTTTAAGACTGGCGGGCTTGAATTTCG  
GAAGAGGGCAGTGAATTCCAAGTGTAGAGGTGAAATTCGTAGATATTCGCAAGAACACC  
AGTGGCGAAGGCGGCTCACTGGCCCCGGAACGACGCTGAGACGCGAAAGCGTGGGGAGCA  
AACAGGATTAGAAACCCAGTAGTCC

>Otu31034

CCAGCCTACGGGGGGCTGCAGTTTCGAATTATTCCCAATGGGCGAAAGCCTGAGGGTGCA  
ATACCGCGTGAGGATGAAGGCTTTAGGATTGTAAACTCCTGTCGTCAGGGACAAAACCT  
TTTATTTTAAATAGAATAGAAGCTGATTTAACTTGAAGAGGAAGAGGTGGCTAACTCTGTG  
CCAGCAGCCGCGGTGATACAGAGACCTCAAGCGTTACTCGGATTCACTGGGCGTAAAGGG  
TACGTAGGTGGAAAGGTGTGTTGGATGTGAAATTCTGGAGCTCAACTCCAGCGCTGCGTC  
CAAACCTATCTTTCTAGAGTACTGTAGAGAAGAGCGGAATTTTCAGGTGTAGCGGTAAAT  
GCGTAGATATCTGAAAGAACACCAACGGCGAAGGCAGCTCTTTGGGCAGTTACTGACACT  
GAGGTACGAAAGCGTGGGGAGCAAAAAGGATTAGATACCCGTGTTAGTCC



>Otu31071

CCAGCCTACGGGAGGCTGCAGTGGGGAATTTTGGACAATGGGCGAAAGCCTGATCCAGCC  
ATGCCGCGTGCGGGAAGAAGGCCTTCGGGTGTAAACCGCTTTTGGCAGGAACGAAACGG  
CGCGGGCTAATACCTCGCGTTAATGACGGTACCTGCAGAATAAGCACCGGCTAACTACGA  
GCCAGCAGCCGCGGTAATACGTAGGGTGCAGCGTTAATCGGAATTACTGGGCGTAAAGC  
GTGCGCAGGCGGCTCCGTAAGACAGATGTGAAATCCCCGGGCTCAACCTGGGAACTGCAT  
TTGTGACTGCGGGGCTCGAGTCTGTCAGAGGGGGGTGGAATTCACGTGTAGCAGTGAAA  
TGCGTAGAGATGTGGAGGAACACCGATGGCGAAGGCAGCCCCCTGGGACAAAACCTGACGC  
TCATGCACGAAAGCGTGGGGAGCAAACAGGATTAGAAACCCGCGTAGTCC

>Otu31077

CCAGCCTATGGGTGGCAGTGGGGAATATTGGACAATGGGGGAAACCCTAATCCAGCAATG  
CCGCGTGAGTGATGAAGGCCTTAGGGTTGTAAAGCTCTTTTAGTAGGGAAGATTATGACG  
GTACCTACAGAAAAAGCACCGGCTAACTCTGTGCCAGCAGCCGCGGTAAGACAGAGGGTG  
CTAGCGTTGTTTCGGAATTACTGGGCGTAAAGGGCGCGTAGGCGGTTGTACAAGTCAGACG  
TTAAATACCTGAGCTTAACTTAGGGATCGCGTTTGATACTGTATGACTAGAGGATGGTAG  
AGGAGAATGGAATTCCTAGTGATAGAGGTGAAATTCGTAGATATTAGGAAGAACACCACTG  
GCGAAGGCGGTTCTCTGGCCATTACTGACGCTAAGGCGCGAAAGCGTGGGGAGCAAACA  
GGATTAGAGACCCCTGTAGTCC

>Otu31088

CCAGCCTACGGGATGCTGCAGTGGGGAATCTTGACACAATGGGCGACAGCCTGATGCAGCA  
ATGCCGCGTGAGGGAAGACGGCCTTCGGGTGTAAACCTCTTTCAGTTGGGATGAAGGTT  
GTGGAGTTAATAGCTCCAGAACTGACCGTACCTTCAGAAGAAGCACCGGCTAACTACGTG  
CCAGCAGCCGCGGTAATACGTAGGGTGCAAGCGTTGTCCGGAATCATTGGGCGTAAAGCG  
CGTGTAGGCGGTTTTGTAAAGTCTGCTGTGAAAGTCGGAGGCTCAACCTTCGAATGCCAGT  
GGATACTGCAAGACTTGAGTACGGAAGAGGAGAGTGGAATTCCTGGTGTAGCGGTGAAAT  
GCGCAGATATCAGGAGGAACACCAACGGCGAAGGCAGCCCCCTGGGATGACACTGACGCT  
CATGCACGAAAGCGTGGGGAGCAAACAGGATTAGAGACCCCTCGTAGTCC

>Otu31096

CCAGCCTATGGGGGGCTCCAGGTGCCACTTCTCCATATGTTGGCCAATTGATGGTCTATA  
AACTACCGGATCGGACCAACGAGACCTTGAACCTTGACAAATCCGAGCTTAGAAACATAA  
AAAACCAGCCTCAAACCTTCCGAAACGGATACGGTAAGTATCTGATCAGTCGAAGAACG  
GTTGTCACCAGGCCGTGCGATAAGTCAGTCAGTCAGTCATCAGTTGAGGATATATTTCGAA  
CTGACTGACTGATGGACTGACTAATCGAAACGTTTAACTGACTGGCTGACTGAGGTGAC  
TGACAGCCGCTGATCAGCTATGGGGCTATATTAAAGAAATCATGAATTTTTATCTGAATT  
ATCTGATCCCCAGTAAATTACTGCCGCATTAGAAACCCGCGTAGTCC

>Otu31106

CCAGCCTATGGGAGGCTGCAGTGGGGAATTTTGGACAATGGGGGCAACCCTGATCCAGCC  
ATGCCGCGTGTGTGAAGAAGGCCTTCGGGTGTAAAGCACTTTTGTCCGGAACGGAACGG  
CGGATGCTAATAACATCCGATAATGACGGTACCTGAAGAAGAAGCTGCGGCTAACTACGT  
GCCAGCAGCCGCGGTAATACGTAGGCAGCGAGCGTTGTTTCGGAATTACTGGGCGTAAAGA  
GTGTGTAGGCGGTGCTCTAAGTTCGGTGTGAAATCTCCTGGCTTAACTGGGAGGGTGCGC  
CGAAAACCTGGAGTGCTCGAGCGTGGGAGAGGAAAGCGGAATTCCTGGTGTAGCGGTGAAA  
TGCGTAGATATCAGGAGGAACACCTGCGGTGTAGACGGCTTTCTGGACCATTGCTGACGC  
TGAGACACGAAAGCGTGGGTAGCAAACAGGATTAGATACCCCCGTAGTCC

>Otu31126

CCAGCCTACGGGAGGCTGCAGTCGAGGATCTTCGGCAATGGGCGCAAGCCTGACCGAGCG  
ACGCCGCGTGTGCGACGAAGGCCTTCGGGTGTAAAGCACTGTGAGGGGGAGGAAGCCG  
CAAGGTTGACCTATCCCTGGAGGAAGCACGGGCTAAGTTCGTGCCAGCAGCCGCGGTAAG  
ACGAACCGTGCGAACGTTGTTTCGGAATCACTGGGCTTAAAGGGCGCGTAGGCGGGCCATC  
AGGTCGGGGGTGAAAGCACACGGCCTAACCGTGTGACTGCCCTGGGATACCGGTGGTCTGG  
AGGGAGGTAGGGGCACGCGGAACCTCCGGTGGAGCGGTGAAATGCGTTGATATCGGAAGG  
AACGCCGCTGGCGAAAGCGGCGTGTGGGCCTTTCTGACGCTGAGGCGCGAAAGCCAGG  
GGAGCGAACGGGATTAGATACCCCCGTAGTCC

>Otu31143

CCAGCCTATGGGTGCTGCAGGGAGGAATATTGGGCAATGGACGAAAGTCTGACCCAGCA  
ACGCCGCGTGAAGGATGAAGGCCTTCTGGGTGTAAACTTCCTTTATCTGGGAAGAAACC  
TCTGATTTCTATTAGAGCCGACGGTACCAGAGGAATAAGCACCGGCTAACTCCGTGCCAG  
CAGCCGCGGTAATACGGAGGGTGCAAGCGTTATCCGGATTCACTGGGTTTAAAGGGTGTG

TAGGCGGGTATTTAAGTCAGTGGTGAATCTCCGGGCTCAACCCGAAACTGCCATTGAT  
ACTATTTATCTTGAATTCTGTTGAGGTGGGCGGAATATGTCATGTAGCGGTGAAATGCAT  
AGAGATGACATAGAACACCGATTGCGAAGGCAGCTCACTAAACAGCTATTGACGCTGAGG  
CACGAAAGCGTGGGGATCAAACAGGATTAGAAACCCGAGTAGTCC

>Otu31182

CCAGCCTATGGGAGGCTGCAGTAAGGAATATTGCGCAATGGGCGAAAGCCTGACGCAGCA  
ACGCCGCGTGAAGGATGAAGGCCTTCGGGTGTAAACTTTTTTTGTCGGGGACGAGCAAG  
GACGGTACCCGCGAATCAGTCACGGCTAACTACGTGCCAGCAGCCGCGGTAAAACGTAG  
GTGGCGAGCGTTATCCGGGTTTACTGGGCGTAAAGCGTGGGCAGGCGGGCGACCAAGTGG  
TGTATGAAAGCACTGCGCTCAACGCAGTGACGGTAGGCCAGACTGGTCTGTCTGGAGGGCG  
AGAGAGGGGCGTGGAATTCCGGGTGTAGTGGTGAATGCGTAGAGATCCGGAGGAACCCC  
AGAGGCGAAGGCGGCGCCCTGGCTCACACCTGACGCTCAGCCACGACAGCATGGGGAGCG  
AACGGGATTAGAAACCCCTGTAGTC

>Otu31204

CCAGCCTATGGGGCGCACCAAGTCGAGAATTTTTTCACAATGGGCGCAAGCCTGACCGAGCG  
ACGCCGCGTGTGCGATGAAGGCCTTCGGGTGTAAAGCACTGTGAGGGGGAGGAAGCCG  
CAAGGTTGACCTATCCCTGGAGGAAGCACGGGCTAAGTTCGTGCCAGCAGCCGCGGTAAAG  
ACGAACCGTGCGAACGTTGTTTCGGAATCACTGGGCTTAAAGGGCGCGTAGGCCGGGTACC  
AAGTCCGGGGTGAAATCCTCCAGCTTAACTGGAGAATAGCCTTGATACTGGTGGTCTCG  
AGCGAGGTAGGGGCGAGCTGGAACCTCCGGTGGAGCGGTGAGATGCGTTGATATCGGAAGG  
AACGCCGCTGGCGAAAGCGAGCTGCTGGACCTCTTCTGACGCTGAGGCGCGAAAGCCAGG  
GGAGCAAACGGGATTAGAAACCCGAGTAGTCC

>Otu31212

CCAGCCTATGGGAGGCAGCAGTGGGGAATATTGGACAATGGGCGCAAGCCTGACCGAGCG  
ACGCCGCGTGTGCGATGAAGGCCTTCGGGTGTAAAGCACTGTGAGGGGGAGAAAGCCG  
CAAGGTTGATCGACCCCTGGAGGAAGCACGGGCTAAGTTCGTGCCAGCAGCCGCGGTAAAG  
ACGAACCGTGCGAACGTTGTTTCGGAATCACTGGGCTTAAAGGGCGCGTAGGCCGGGTGCC  
AAGTCAAGGGTGAAATCCCGCGGCTCAACCGCAGAAGAGCCCCTGATACTGGCGGTCTCG  
AGGGAGGTAGGGGCGTGTGGAACCTCCGGTGGAGCGGTGAAATGCGTAGATATCGGAAGG  
AACGCCGCTGGCGAAAGCGACACGCTGGCCCTCTACTGACGCTGAGGCGCGAAAGCCAGG  
GGAGCAAACGAGATTAGATACCCCCGTAGTCC

>Otu31225

CCAGCCTACGGGTTGCTGCAGTGGGGAATCTTGCAACAATGGGCGAAAGCCTGATGCAGCG  
ACGCCGCGTGGGTGAAGAAGGCCTTCGGGTGTAAAGCCCTGTGAGTGGGAAAAATGGC  
GACTTGAGTAATATGCAAGTCGATTGATGGTACCACTAGAGGAAGCACCGGCTAACTCCG  
TGCCAGCAGCCGCGGTAATACGGAGGGTGCAAGCGTTGTTTCGGAATTATTGGGCGTAAAG  
GGCAGGTAGGTGGTCTTGAAAGTCTACTGTGAAATCCCGAGCTTAACTTGGGAAGTGCG  
GTGGAAGTACAAGACTAGAGTGCTGGAGGGGTGCGTGGAATTCCTGGTGTAGCGGTGAA  
ATGCGTAGATATCAGGAGGAACACCAGAGGTGAAGGTGGCGCACTGGACAGCAACTGACA  
CTCAACTGCGAAAGCGTGGGGAGCAAACAGGATTAGAAACCCTCGTAGTGC

>Otu31231

CCAGCCTACGGGGGGCTGCAGTGGGGAATCTTGCAACAATGGAGGAAACTCTGATGCAGCG  
ACGCCGCGTGTGAGCGATGAAGCCCTTCGGGGTGTAAAGCTCTTTCGACGGGAACGATAATG  
ACGGTACCTGTGGAGGAAGCATCGGCTAACTACGTGCCAGCAGCCGCGGTAATACGAAGG  
GGGCTAGCGTTGCTCGGAATGACTGGGCGTAAAGGGCGCGTAGGCCGGTTTGGACAGTTAG  
GCGTGAAATTCTTGGGCTCAACCTGGGGACTGCGCTTAATACATCCAGACTTGAGTGCGG  
AAGAGGGTTGTGGAATTCACAGTGTAGAGGTGAAATTCGTAGATATTGGGAAGAACACCG  
GTGGCGAAGGCGGCAACCTGGTCCGTGACTGACGCTGAGGCGCGAAAGCGTGGGGAGCAA  
ACAGGATTAGATACCCCAGTAGTCC

>Otu31234

CCAGCCTACGGGTGGCTCCAGTGGGGAATATTGGACAATGGGGGAAACCCTGATCCAGCG  
ACGCCGCGTGTGTGAAGAAGGCCTGCGGGTGTAAAGCACTTTTAGTGGGGACAAAAAGC  
TACGGATTAATACTCTGTGGTCTTGATTTAACCCAAAGAAAAAGCACCGGCTAACTCTGT  
GCCAGCAGCCGCGGTAATACAGAGGGTGCAAGCGTTAATCGGAATTACTGGGCGTAAAGC  
GTGCGTAGACGGTTTTTTAAGTCGGATGTGAAATCTCCCGGCTCAACTGGGAGGGTGCGC  
CGAATACTGAATGACTTCGAGTGCGGGAGAGGAAAGTGGAATTCCTGGTGTAGCGGTGAA  
ATGCGTAGATATCAGGAGGAACACCGGTGGTGTAGACGGCTTTCTGGACCGTAACTGACG  
CTGAGACACGAAAGCGTGGGTAGCAAACAGGATTAGAGACCCGAGTAGTCC

>Otu31246

CCAGCCTATGGGGGGCAGCAGCCGAGAATATTCGACAATGGGCGAAAGCCTGATCGAGCG  
ACGCCGCGTGCGGGATGAAGTGCTTCGGCACGTAAACCGCTTTTGCCGGGGAAGAAGTCT  
ATTGACGGTACCCGGCGAATAAGGAGTTGCTAAACTCGTGCCAGCAGCAGCGGTAATACG  
AGTGCTCCAAGCGTTATCCGGAATTATTGGGCGTAAAGGGTGTGTAGGCGGTCTGTGTAG  
TCTCTTGTTAAATTTCTTCGGCTCAACCGGGGGCATGCAGGAGAAACGGCACGACTAGAGG  
GCGCGAGAGGCATGCGGAACTCATGGTGTAGGGGTGAAATCCGTTGATATCATGGGGAAC  
ACCGAAAGCGAAGGCAGCATGCTGGCGCGTTCCCTGACGCTGAAACACGAAAGCGTAGGTA  
GCGAATGGGATTAGAGACCCGAGTAGTCC

>Otu31247

CCAGCCTACGGGGTGCAGCAGTTAGGAATCTTGCGCAATGGGCGAAAGCCTGACGCAGCC  
ATGCCGCGTGAATGATGAAGGTCTTAGGATTGTAAATTTCTTTCAGCAGGGAAGATAATG  
ACGGTACCTGCAGAAGAAGCTCCGGCTAACTTCGTGCCAGCAGCCGCGGTAATACGAAGG  
GGGCTAGCGTTGTTTCGGAATTACTGGGCGTAAAGCGCACGCAGGCGGCTCGATAAATTAG  
AAGTGAAAGCCTTGGGCTTAACCTGAGAATTGCTTTTAAGACTGTTCGAGCTAGAATCCAG  
AAGAGGGTAGTGGAATTCGAGTGTAGAGGTGAAATTCGTAGATATTTCGGAAGAACACCA  
GTGGCGAAGGCGACTAACTGGTCTGGCATTGACGCTCATGTGCGAAAGCGTGGGGAGCAA  
ACAGGATTAGATACCCTAGTAGTCC

>Otu31260

CCAGCCTATGGGATGCTCCAGTGGGGAATTTTGGACAATGGGGGCAACCCTGATCCAGCA  
ATGCCGCGTGTGTGAAGAAGGCCTTCGGGTGTAAAGCACTTTTGTTCGGAACGAAACGG  
ACTGAGTTAATACCTTGGTCTAATGACGGTACCTGAAGAATAAGCACCGGCTAACTACGT  
GCCAGCAGCCGCGGTAATACGTAGGGTGCAAGCGTTAATCGGAATTACTGGGCGTAAAGC  
GTGCGCAGGCGGTTATGTAAGACAGATGTGAAATCCCCGGGCTCAACCTGGGAACTGCAT  
TTGATACTGCCTGGCTAGAGTATCGAAGAGGGAAGTGGAATTTCCGGTGTAGCGGTGAAA  
TGCGTAGATATCGGAAGGAACACCACTGGCGAAAGCGACTTCCTGGTTCGAATACTGACGT  
TCATGTGCGAAAGCGTGGGGAGCAAACAGGATTAGATACCCGTGTAGTCC

>Otu31266

CCAGCCTATGGGGTGCTGCAGTGGGGAATATTGGACAATGGGCGCAAGCCTGATCCAGCA  
ATGCCGCGTGGGTGAAGAAGGTCTTCGGATTGTAAAGCCCTTTTCGACGGGGAAGATAATG  
ACGGTACCCGCGAGAATAAGCACCGGCTAACCTCGTGCCAGCAGCCGCGGTAATACGAAGG  
GTGCTAGCGTTGTTTCGGAATTACTGGGCGTAAAGCGCGCGTAGGCGGTGATGCAAGTCAG  
GGGTGAAATCCCGGAGCTTAACCTCCGGAACGCCTTTGAAACTGCATTGCTGGAGTGTGT  
GAGGGGATAGCGGAATTCCTAATGTAGAGGTGAAATTCGTAGATATTAGGAGGAACACCG  
GTGGCGAAGGCGGCTATCTGGCGCACAACTGACGCTGAGGCGCGAAAGCGTGGGGATCAA  
ACAGGATTAGATACCCCGTAGTCC

>Otu31276

CCAGCCTATGGGTCGCAGCAGTGGGGAATCTTGGGCATAAGCTAACGCTTGACCCAGCAA  
TATCACGTGAAGGATGAAGGTTTAATTATCGTAAACTTTTGCTTATCATTAGAATAGTGA  
TCTTTTGATGAGAAGCTCCGACTACTTCGTGCCAGCAGTCGCGGTAATACGGGGGGAGCT  
AGCGTTATTTCGGAATGATTGGGCGTAAAGGGTACGCAGGCAGTTTTTTATTACATGTGGCT  
TAAAATAAACGGGTGTAGCCCTTTTAAACACATTTGATTCTAAAACTAGAGTTTAAAAGA  
AGATTGTGCGAAAACCTAGTGGAGCGCTAAAATGTGGTTGAGATTAGTAGTACGACTGTGG  
TGACAACGACCTCTATCATAAAACCTGACGCTCAGGTATTAAAGTGTAGGTAGTGAACAGG  
ATTAGAAACCCCTAGTAGTCC

>Otu31280

CCAGCCTATGGGGGGCACCAAGTGGGGAATATTGGACAATGGGCGAAAGCCTGATCCAGCA  
ATGCCTCGTGAGTGATGAAGGCCTTAGGGTTGTAAAGCTCTTTCGGGTGGGACGATGATG  
ACGGTACCCATAGAAGAAGCCCCGGCTAACTTCGTGCCAGCAGCCGCGGTAATACGAGGG  
GGGCAAGCGTTGTTTCGGAATTACTGGGCGTAAAGGGCGCGTAGGCGGTGTACTAAGTTAG  
GCGTGAAAGCCCTGGGCTCAACCCGGGAATTGCGCTTGATACTGGTACGCTAGAATCCAG  
GAGAGGTTGGTGGAATTCACAGTGTAGAGGTGAAATTCGTAGAGATTGGGAAGAACACCG  
GTGGCGAAGGCGGCCAACTGGACTGGTATTGACGCTGAGGCGCGAAAGCGTGGGGAGCAA  
ACAGGATTAGAGACCCAGTAGTCC

>Otu31296

CCAGCCTACGGGGCGCAGCAGTGGGGAATATTGGACAATGGGGGCAACCCTGATCCAGCG  
ATGCCGCGTGTGCGAAGAAGGCCTGCGGGTTGTAAAGCACTTTCCGTGGGGAGGAAGTTA  
TTGGTGGGAACATCACTGATAATTGACGTTACCCACAAAAGAAGCACCGGCTAACTCCGT

GCCAGCAGCCGCGGTAATACGGAGGGTGCAAGTGTTAATCGGAATTACTGGGCGTAAAGG  
GCGCGTAGGTGGTATTTTAAAGTTAGCTGTGAAATTCCTGGGCTTAACCTGGGGTGGTCAG  
CCAATACTGAAGGACTAGAGTCCGAGAGAGGGTAGTGGAATTTCCGGTGTAGCGGTGAAA  
TGCGTAGATATCGGAAGGAACACCAGTGGCGAAGGCGACTACCTGGCTCGAGACTGACAC  
TGAGGCGCGAAAGCGTGGGGAGCAAACAGGATTAGATACCCTGGTAGTCC

>Otu31313

CCAGCCTATGGGAGGCTCCAGTAGGGAATTTTCCACAATGGGCGCAACCCTGAAGGAGCG  
ACGCCGCGTGGAGGATGAAGGTCTTCGGATTGTAAACTCCTGTCATTTGGGAACAAGTTG  
CAGCGATTAACTGTCGCCGCATTGATAGTACCAGAAGAGGAAGAGACGGCTAACTCTGTG  
CCAGCAGCCGCGGTAATACAGAGGTCTCAAGCGTTGTTTCGGATTCAATTGGGCGTAAAGGG  
TGCGTAGGTGGCGAGGTTAGTCAGGTGTGAAATCTCGGGGCTCAACCCCGAAACTGCACT  
TGATACTGCCTTGCTAAAGTACTGGAGAGGAGATTGGAATTTACGGTGTAGCAGTGAAAT  
GCGTAGATATCGTAAGGAAGACCAGTGGCGAAGGCGAATCTCTGGACAGTTACTGACACT  
GAGGCACGAAGGCCAGGGGAGCAAACGGGATTAGAAACCCCTGTAGTCC

>Otu31361

CCAGCCTACGGGTCGCTCCAGTCGAGAATATTCGACAATGGGCGAAAGCCTGATCGAGCG  
ACACCGCGTGCAGGATGAAGGCCCTCGGGTCGTAAACTGCGGTAGTATGGTAAGAATGTA  
AATGACTGTCATACGGAAGAGGTGGGTAACCTACGTGCCAGCACCAGCGGTGATACGTAG  
ACCTCAAGCGTTATTCGGATTTATTGGGCGTAAAGAGCATGTAGGAGGTTTCGCGCGTCT  
TTTGTTAAAGCCACCGCCTAACGGTGGAAAGTGAAGAGATACGGCGGAAGTAGAGGAGG  
TTAGAGGTGCATGGAAGTACCGGTGTAGGGGTGAAATCCGTTGATATCGTGGGGAAACACC  
AGAGGCGAAAGCGACTTCCTGGTCAATACTGACGTTTATGTGCGAAAGCGTGGGGAGCA  
AACAGGATTAGAAACCCTAGTAGTCC

>Otu31370

CCAGCCTACGGGAGGCACCAGTTGGGAATCTTGGACAATGGGGGAAACCCTGATCCAGCC  
ATGCCGCGTGTGTGAAGAAGGCCCTTCGGGTGTAAAGCACTTTTATCCGGAACGAAACGC  
GCAGGGTGAATATACTTGCGAACTGACGGTACCGCAAGAATAAGCCCCGGCTAACTTCGT  
GCCAGCAGCCGCGGTAATACGAAGGGGGCTAGCGTTGCTCGGAATCACTGGGCGTAAAGG  
GTGCGTAGGCGGGTCTTTAAGTCAGGGGTGAAATCCTGGAGCTCAACTCCAGAACTGCCT  
TTGATACTGAGGATCTTGAGTTTCGGGAGAGGTGAGTGGAAGTGCAGAGTGTAGAGGTGAAA  
TTCGTAGATATTCGCAAGAACACCAGTGGCGAAGGCGGCTCACTGGCCCGATACTGACGC  
TGAGGCACGAAAGCGTGGGGAGCAAACAGGATTAGAAACCCCTGTAGTCC

>Otu31392

CCAGCCTATGGGTGGCAGCAGGCGAATGCTCAACATCGTGGCCGGTGTGCGAGGCGAGCTT  
CGCAGTATGGATCGTCTGAATCGTGCTGCTGAGAGGGGCAGAATGTTCTTGAGCTGTATC  
GATTTCAACGCAATCGATCATAAATAGCAGGGTGAAAATCCCAAACGCTGCGATTCCAAC  
CGACGAAATCGCTGCAGCGGGTGAAAGCGAATCAATGCTAAATCCAGCAATTTGCAAATA  
CAAACCCACCAGAAGTAAAACGACAGCGGTGTGACGGATCGACAACCCAAGTCGCTGGAG  
CCTGAAATGTAGGTGATTACGATCCGCCATGAAGAGGGGCTGGCCGCTTCGATACCTTCG  
GTAAACGGCGAGACCCATGTCCAGAATGGGGTATCCCAGGAGTAGCACCAGGTTGAGGAA  
CGACTTGAGGGGCTGATCAGTGCTTTGTGTGACAGCACTTTGACATGCGATTAGAGACCC  
TTGTAGTCC

>Otu31404

GGACTACTGGGGGTTTTCTAATCCTGTTTGATCCCCACGCTTTCGTGCCTCAGCGTCAGTT  
ACAGTTTCGTGAGCTGCCTTCGCAATCGGTGTTCTGTGTGCATATCTATGCATTTACCGC  
TACATGACACATTCCGCCAACGGCATCTGTACTCAAGACCTACAGTATCAATGGCACGTT  
CGATGTTAAGCATCGAGATTTACCACTGACTTATAAGTCCGCCTACGCACCCTTTAAAC  
CCAATAAATCCGGATAACGCTTGCATCCTTCGTATTACCGCGGCTGCTGGCACGAAGTTA  
GCCGATGCTTATTCTTACGGTACTATCAGCTATCTACACGTAGATAGGTTTTCTCCCGTA  
CAAAAGCAGTTTACAACGCGTAGCGCCTTCATCCTGCACGCGGCATGGCTGGATCAGTGT  
TGCCACCATTGTCCAATATTTCCTTACTGCAGCATCCCATAGGCTGG

>Otu31405

CCAGCCTATGGGTGGCTGCAGTCGAGAATTTTCTCAATGGGCGAAAGCCTGAAGGAGCG  
ACGCCGCGTGGGGGATGAATGTCTTCGGATTGTAAACTGCTTTTATATGTGACGAATATG  
ACGGTAGCATATGAATAAGGATCGGCTAACTCCGTGCCAGCAGCCGCGGTACATACGGAGG  
ATCCAAGCGTGATCCGGAATTACTGGGCGTAAAGAGTTGCGTAGGTGGCAAAGTAAGCGG  
ACAGTGAAATCGTGTGGCTCAACCATGCACCCATTGTCTGAACTGCTTAGCTAGAGGATG  
AGAGAGGTTATTGGAATTTCTAGTGTAGGAGTGAAATCCGTAGATATTAGAAGGAACACC

GATGGCGTAGGCAGATAACTGGCTCATTCCTGACACTAAGGCACGAAAGCGTGGGTAGCA  
AACGGGATTAGATACCCCCGTAGTCC  
>Otu31423  
CCAGCCTATGGGTGGCTCCAGTGGGGAATCTTGGACAATGGGGGCAACCCTGATCCAGCC  
ATGCCGCGTGAGTGATGAAGGCCCTCGGGTTGTAAACTCTTTTCGACGGGGACGATAATG  
ACGGTACCCGTAGAAGAAGCTCCGGCTAACTTCGTGCCAGCAGCCGCGGTAATACGAAGG  
GGGCTAGCGTTGCTCGGAATGACTGGGCGTAAAGGGCGCGTAGGCGGCTGTCATAGTCAG  
ATGTGAAATTCCTGGGCTTAACCTGGGGGCTGCATTTGATACGTGGCGGCTAGAGTGC GG  
AAGAGGGTCGTGGAATTC CAGTGTAGAGGTGAAATTCGTAGATATTGGGAAGAACACCG  
GTGGCGAAGGCGGCGACCTGGTCCGATACTGACGCTGAGGCGCGAAAGCGTGGGGAGCAA  
ACAGGATTAGATACCCTCGTAGTCC  
>Otu31438  
CCAGCCTATGGGGGGCTGCAGTCGAGGATCTTCGGCAATGGGCGCAAGCCTGACCGAGCG  
ACGCCGCGTGTCGATGAAGGCCCTCGGGTTGTAAAGCACTGTCGGAGGGTTGAAAAGGC  
AACTTGATCGACCCTCGGAGGAAGCACGGGCTAAGTTCGTGCCAGCAGCCGCGGTAAGAC  
GAACCGTGCGAACGTTATTTCGGAATCACTGGGCTTAAAGGGCGCGTAGGCGGGCAAGCAA  
GTCGGAGGTGAAAGCCCACAGCTCAACTGTGGAAGGGCCCCGATACTGCATGTCTGGAG  
GGAGGTAGGGGCGTGCGGAACCTCCGGTGAGCGGTGAAATGCGTAGATATCGGAAGGAA  
CACCGGTGGCGAAAGCGGCGCGCTGGACCTTTACTGACGCTGAGGCGCGAAAGCCAGGGG  
AGCAAACGGGATTAGAGACCCGAGTAGTCC  
>Otu31441  
CCAGCCTACGGGTGGCAGCAGTGGGGAATATTGGACAATGGGCGCAAGCCTGATCCAGCC  
ATGCCGCGTGAGTGATGAAGGCCCTAGGGTTGTAAAGCTCTTTTGTGCGGGAAGATAATG  
ACGGTACCGCAAGAATAAGCCCCGGCTAACTTCGTGCCAGCAGCCGCGGTAATACGAAGG  
GGGCTAGCGTTGTTTCGGAATTACTGGGCGTAAAGGGCGCGTAGGCGGCGTTACAAGTTAG  
GCGTGAAAGCCCCGGGCTCAACCTGGGAATTGCGCTTGATACTGTAGTGCTAGAGTTCGG  
GAGAGGTGAGTGGAATTC CAGTGTAGAGGTGAAATTCGTAGATATTGGGAAGAACACCG  
GTGGCGAAGGCGGCTCACTGGACCATAACTGACGCTGAGGCGCGAAAGCTAGGGGAGCAA  
ACAGGATTAGAAACCCTGGTAGTCC  
>Otu31460  
CCAGCCTATGGGATGCTGCAGTGGGGAATATTGCACAATGGGCGAAAGCTTGATGCAGCG  
ACGCCGCGTGAGGATGAAGGTTTTTCGATTGTAAACTCCTGTTGAGTGGGAAGAAAGAC  
TAGTACCTAATACGTACTGGGGATGACGGTACCCTTTAGAAAGCACCGGCAAACCTTCGT  
GCCAGCAGCCGCGGTAATACGAAGGGTGCGAGCGTTATTTCGGAATTACTGGGCGTAAAGA  
GCGCGTAGGCGGCTTTTTTAAGTCATTTGTAAATCTCCCGGCTTAACCGGGAATCAGCAT  
ATGATACTGAAAAGCTAGAGTATAAGAGAGAGAAGCGGAATTCCTCGGAGTAGCGGTAAAA  
TGCGTAGATCTCGAGAGGAACACCGGAGGCGAAGGCGGCTTCTTGGCTTATTACTGACGC  
TCAAGTGCGAAAGCGTGGGGAGCAAACAGGATTAGATACCCAGTAGTCC  
>Otu31463  
CCAGCCTATGGGACGCAGCAGTCGAGAATTTTTCTCAATGGGGGAAACCCTGAAGGAGCG  
ACGCCGCGTGGGGGATGAATGGCTTCGGCCCGCAAACCCTGTCATTTGTGAACAAGTTG  
ATTCACCTAACACGTGAATCATTTGATAGTAGCGAAAGAGGAAGGGACGGCTAACTCTGTG  
CCAGCAGCCGCGGTAATACAGAGGTCCCAAGCGTTGTTTCGATTCACTGGGCGTAAAGGG  
TGCGCAGGTGGCCAAGTGTGTGAGGCGTGAAAGCCCGGAGCTCAACTCCGGAATTGCACC  
TCAAACCTACATGGCTAGAGCATTTGGAGAGGGGAGCAGAATTCACGGTGTAGCAGTGAAAT  
GCGTAGATATCGTGAGGAATACCAGAGGCGAAGGCGGCTCCCTGGACAATAGCTGACACT  
CAGGCACGAAAGCGTGGGGAGCAAAGGGATTAGATACCCAGTAGTCC  
>Otu31473  
CCAGCCTATGGGGTGCAGCAGTGGGGAATATTGGACAATGGGCGAAAGCCTGACGCAGCG  
ACGCCGCGTG CAGGACGAAGGCCCTCGGGTTGTAAACTGCTTTTCTCTGTGAAGATTATG  
ACGGTAACAGAGGAATAAGGACCTGCTAACTACGTGCCAGCAGCCGCGGTCATACGTAGG  
GTCCAAGCGTTATCCGGAATTACTGGGCGTAAAGAGTTGCGTAGGTGGCATAGTAAGCGG  
GTAGTGAAATTGTGTGGTTCAACCATAACCCATTATCCGAACTGCTAAGCTAGAGAGCG  
AGAGAGGTAGATGGAATTC CAGTGTAGGAGTGAAATCCGTAGATATTGGGAGGAACACC  
GATGGCGTAAGCAGTCTACTGGCTCGTTTCTGACACTAAGGCACGAAAGCGTGGGGAGCA  
AACGGGATTAGATACCCTAGTAGTCC  
>Otu31480  
CCAGCCTATGGGGTGCAGTGGGGAATCTTGCGCAATGGACGAAAGTCTGACGCAGCC

ACGCCGCGTGAGTGAAGAAGGCCTTCGGGTTGTAAAGCTCTGTCTGGGCGGGACGAAAAAT  
CTGGGTGTTAACAGCGCCCAGACTTGACGGTACCGCCAAAGGAAGCACCGGCTAACTTCG  
TGCCAGCAGCCGCGGTAATACGAGGGGTGCAAGCGTTGCTCGGAATTATTGGGCGTAAAG  
GGTAGGTAGGTGGTCTCGTTTGTCTGGGGTGAAATCCTTGAGCTTAAGTCAAGAAGTGCC  
CTAGAAACGGCGAGACTCGAGTGCTGGAGAGGGTCTGTGGAATCCCCGGTGTAGCGGTGAA  
ATGCGTAGAGATCGGGAGGAACACCAGAGGCGAAGGCGGCGACCTGGACAGTGAAGTACA  
CTCAACTACGAAAGCGTGGGGAGCAAACAGGATTAGAGACCCGCGTAGTCC

>Otu31493

CCAGCCTATGGGTGGCTGCAGTAGGGAATCTTGCGCAATGGAGGAACTCTGACGCAGCG  
ACGCCGCGTGGGTGACGAAGGCCTTCGGGTCGTAAAGCCCTGTCTGGAAGGGACGAAAAAC  
GAGCTGGCTAACATCCAGCACGCTTGACGGTACCTTTAGAGGAAGCACCGGCTAACTACG  
TGCCAGCAGCCGCGGTAATACGTAGGGGTGCAAGCGTTGTTTCGAAATCATTGGGCGTAAAG  
CGCGTGTAGGTGGTTAGGTAAGTCGGGTGTGAAATCCCTGGGCTCAACCGAGGAAGTGCA  
TCCGAAACTACCTAGCTGGAGGACGGTAGAGGAAGGTGGAATTCCTAGTGTAGAGGTGAC  
ATTCTGTAGATATTAGGAGGAATACCGGTGGCGAAGGCGGCCTTCTGGGCCGTTCTCTGACA  
CTGAGACGCGAAAGCGTGGGTAGCAAACAGGATTAGAAACCCTAGTAGTCC

>Otu31506

CCAGCCTACGGGAGGCACCAAGTGGGGAATCTTGACGATGGGGGCAACCCTGATCCAGCC  
ATGCCGCGTGAGTGATGAAGGCCTTCGGGTTGTAAACTCTTTCGACGGGGACGATAATG  
ACGGTACCCGTAGAAGAAGCCCCGGCTAACTTCGTGCCAGCAGCCGCGGTAATACGAGGG  
GGGCTAGCGTTGTTTCGGAATTACTGGGCGTAAAGGGCGCGTAGGCGGCGTTACAAGTTAG  
GCGTGAAAGCCCCGGGCTCAACCTGGGAATTGCGCTTGATACTGTAGTGCTAGAGTTCGG  
GAGAGGTGAGTGGAATTCACAGTGTAGAGGTGAAATTCGTAGATATTGGGAAGAACACCG  
GTGGCGAAGGCGGCTCACTGGACCGATACTGACGCTGAGGCGCGAAAGCGTGGGGAGCAA  
ACAGGATTAGAGACCCTCGTAGTCC

>Otu31509

CCAGCCTATGGGTGGCTGCAGTGGGGAATTTTGCGCAATGGGGGAAACCCTGACGCAGCA  
ACGCCGCGTGAGAGGATGAGATATCTTGGTATGTAAACTCCTTTCGATGGGGAAGATTATG  
ACGGTACCCATAGAAGAAGCCCCGGCTAACTTCGTGCCAGCAGCCGCGGTAATACGAAGG  
GGGCTAGCGTTGTTTCGGATTTACTGGGCGTAAAGCGCACGTAGGCGGTGTGGCAAGTCGG  
TAGTGAAATCTCTGGGCTTAACCCAGAGGCTGCTGCCGAAACTGCTATGCTAGAGTGTGA  
GAGAGGCGAGTGGAATTACGGGTGTAGCGGTGAAATGCGTAGATATCCGTAGGAACATCC  
GAGGCGAAGGCGGCTCGCTGGATCACAACTGACGCTGAGGGACGAAAGCTAGGGGAGCAA  
ACAGGATTAGATACCCAGTAGTCC

>Otu31526

CCAGCCTACGGGTTGCTCCAGTGGGGAATATTGCGCAATGGGCGAAAGCCTGACGCAGCG  
ACGCCGCGTGGGTGATGAAGGCCTTCGGGGTGTAAGCTCTTTCGGCAGGGAAGATTATG  
ACGGTACCTGCAGAAGCAGCTGCGGCTAACTACGTGCCAGCAGCCGCGGTAATACGTAGG  
CAGCAAGCGTTGTTTCGGAGTTACTGGGCGTAAAGGGTGTGTAGGCGGTTTTCTAAGTCTG  
GTGTGAAATCTCCCGGCTCAACTGGGAGGGTGCGCCGAAACTGGAAAGCTAGAGTGCAG  
GATGGGAGAGTGGAATTCCTGGTGTAGCGGTGAAATGCGTAGATATCAGGAGGAACACCT  
GTAGTGTAGACGGCTCTCTGGACCGCAACTGACGCTGAGACACGAAAGCGTGGGTAGCAA  
ACAGGATTAGAAACCCGAGTAGTCC

>Otu31585

CCAGCCTATGGGAGGCAGCAGTCGAGAATCTTTCACAATGGACGAAAGTCTGATGGAGCG  
ACGCCGCGTGGGGGATGAATGGCTTCGGCCCGTAAACCCCTGTCAATTTGCGAACAAACCT  
CGTGATTTAACAGATGACGAGTTGATAGTAGCGAAAGAGGAAGGGACGGCTAACTCTGTA  
CCAGCAGCCGCGGTAATACAGAGGTCCCAAGCGTTGTTTCGGATTCCTGAGGCGTAAAGGG  
TGCGTAGGCGGCCGGGTAAGTCTGACGTGAAATCTCCAAGCTCAACTTGAAACGGCGTC  
GGATACTATCCGGCTGGAGGAATGGAGGGGAGACTGGAATTCCTCGGTGTAGCAGTGAAAT  
GCGTAGATATCGAGAGGAACACCAGTGGCGAAGGCGAGTCTCTGGACATTACCTGACGCT  
GAGGCACGAAAGCCAGGGGAGCAAACGGGATTAGAAACCCTAGTAGTCC

>Otu31589

CCAGCCTACGGGAGGCAGCAGTAGGGAATATTACACAATGGGCGAAAGCCTGATGCAGCA  
ACGCCGCGTGACGAAGAAGGTCTTCGGATCGTAAAGTGCTTTTCTGAGAGATGAGAAAG  
GACAGTATCTCAGGAATAAGTCTCGGCTAACTACGTGCCAGCAGCCGCGGTAACACGTAG  
GAGGCAAGCGTTATCCGGATTCACTGGGCGTAAAGCGTGTGCAGGCGGTTCCGTAAGTTG  
GGCGTGAAATCTCCCGGCTCAACTGGGAGAGGTCTGTTCAATACTACCGGGCTAGAGAGCA

GTAGAGGAAGATGGAATTCCAGGTGTAGGGGTGAAATCTGTAGATATCTGGAAGAACACC  
GGTGGCGAAGGCGAGCTTCTATCAGAGGACTGACGCTGAGGCGCGAAAGCGTGGGGAGCA  
AACAGGATTAGAAACCCGAGTAGTC

>Otu31604

CCAGCCTATGGGTGGCAGCAGTGGGGAATTTTGC GCAATGGGGGAAACCCTGATGCAGCG  
ACGCCGCGTGAGGATGAAGGTTTTTCGATTGTAAACTCCTGTTAAGTGGGATGAAAGAC  
TGATACCTAATACGTATTGGGGATGACAGTACCCTAGAGAAAGCACCGGCAAACTACGT  
GCCAGCAGCCGCGGTAACACGTAGGAGACGAGCGTTATCCGGATTTACTGGGCGTAAAGC  
GCGTGCAGGCGGTTTTGGTAAGTTGGATGTGAAAGCTCCTGGCTTAAGTGGGAGAGGTCGT  
TCAATACTGCCAGACTAGAGGATGGTAGAGGGAGGTGGAATTTCTGGGTGTAGTGGTGAAA  
TGCGTAGATATCCAGAGGAACACCAGTGGCGAAAGCGGCCTCCTGGACCATTTCTGACGC  
TCATACGCGAAAGCTAGGGTAGCAAACGGGATTAGAAACCCAGTAGTCC

>Otu31620

CAGCCTATGGGAGGCAGCAGTAAGGGATATTGCGCAATGGGCGAAAGCCTGACGCAGCAA  
CGCCGCGTGAAAGGATGAAGACCTTCGGGTTGTAAACTCCTTTTATTGGGGAAGAATAATG  
ACGGTACCCAATGAATAAGCCCCGGCTAACTACGTGCCAGCAGCCGCGGTAATACGTAGG  
GGGCAAGCGTTATCCGGATTTACTGGGCGTAAAGCGGGTGTAGGTGGCCTGTCAAGTCAG  
GTGTGAAATCTCCCGGCTCAACTGGGAGGGTGCATTTGATACTGATGGGCTAGAGTGCAG  
CAGAGGGCGATGGAATTCCTGGTGTAGTGGTGAAATGCGTAGATATCGGGAAGAACACTA  
GTGGCGAAGGCGGTCACCTGGGCTGTAACTGACACTGAGACCCGAAGGCGTGGGGAGCAA  
ACAGGATTAGAAACCCGCGTAGTCC

>Otu31637

CCAGCCTATGGGATGCACCAGTAGGGAATTTTCCGCAATGGGCGAAAGCCTGACGGAGCA  
ATGCCGCGTGAGGTAGAAGGCCACGGGTCGTGAAGCTCTGTGAGAGGGAAAGAAGTGT  
AGGAGGGATAATACCCCTTTTACTTGACGGTACCCTCAAAGGAAGCACCGGCTAACTCCG  
TGCCAGCAGCCGCGGTAATACGGAGGGTGCAGCGGTTGTTCCGAATTATTGGGCGTAAAG  
CGCGTGTAGGCGGTTTTTTAAGTCTGATGTGAAAGCCCTGGGCTCAACCCGGGAAGTGCA  
TTGGAAGTGGGAGACTTGAATACGGGAGAGGGTAGTGGAATTCCTGGTGTAGGAGTGAA  
ATCCGTAGATATCAGGAGGAACACCGGTGGCGAAGGCGGCTACCTGGACCGATATTGACG  
CTGAGACGCGAAAGCGTGGGGAGCAAACAGGATTAGAAACCCCGTAGTCC

>Otu31674

CCAGCCTATGGGGGGCTCCAGTGGGGAATATTGGACAATGGGGGAAACCCTGATCCAGCA  
ATGCCGCGTGAGTGATGAAGGCCTTAGGGTTGTAAAGCTCTTTTGGCGGGGACGATAATG  
ACGGTACCCGCGAGAATAAGCCCCGGCTAACTACGTGCCAGCAGCCGCGGTAACACGTAGG  
GGGCGAGCGTTGTTCCGAATTACTGGGCGTAAAGGGCATGTAGGCGGCTCTGTAAGTCCG  
GCGTGGAAGCCCACGGCTCAACCGTGGGATTGCGCTGGAAACTGCGGGGCTTGAATCATG  
GAGAGGGAGCTAGAATTCAGGTGTAGGGGTGAAATCTGTAGAGATCTGGAAGAATACCA  
GTGGCGAAGGCGAGCTCCAGGCCAATGATTGACGCTGAGGTGCGAAAGTGTGGGGATCAA  
ACAGGATTAGATAACCTCGTAGTCC

>Otu31695

CCAGCCTACGGGTGGCACCAGTGGGGAATATTGGACAATGGGCGAAAGCCTGATCCAGCC  
ATGTCGCGTGAGTGATGAAGGCCTTAGGGTTGTAAAGCTCTTTTATCAGGGAAGATAATG  
ACGGTACCTGAAGAATAAGCACCGGCTAACTTCGTGCCAGCAGCCGCGGTAATACGAAGG  
GTGCTAGCGTTGTTCCGAATTACTGGGCGTAAAGCGGGCGTAGGCGGCTATTCAAGTCAG  
AGGTGAAATCCCTGGGCTCAACCCAGGAATTGCCTTTGAAACTGTATAGCTTGAGTACTG  
GAGGGGATAGCGGAATTCCTAATGTAGAGGTGAAATTCGTAGATATTAGGAGGAACACCG  
GTGGCGAAGGCGGCTATCTGGACAGTAACCTGACGCTGAGGCGCGAAAGCGTGGGGATCAA  
ACAGGATTAGATAACCCCGTAGTCC

>Otu31698

CCAGCCTACGGGTCGCTGCAGTAGGGAATATTGCACAATGGACGAAAGTCTGATGCAGCG  
ACGCCGCGTGAGTGATGAAGGCCTTCGGGTTGTAAAGCTCTGTTCTCAGGGAATAAAAG  
ATGAAGGTACCTGAGAAGAAAGGACCGGCTAACTTCGTGCCAGCAGCCGCGGTAAGACGA  
GGGGTCCAAGCGTTGCTCGGAATTATTGGGCGTAAAGCGAGTGTAGGTGGCTTTGTAAAGT  
CAGGAGTGAAAGCCCTGGGCCTAACCCAGGAAGTGCTTTTGATACTGCAAAGCTTGAATG  
TGGGAGAGGATCGTGGAATTCAGGTGTAGTGGTGAAATACGTAGATATCTGGGGGAACA  
CCGGTGGCGAAGGCGGCGATCTGGCCCAACATTGACACTGAGACTCGAAAGCGCGGGGAT  
CAAACAGGATTAGAAACCCAGTAGTCC

>Otu31704

CCAGCCTACGGGTCGCTCCAGTAGGGAATATTGGACAATGGGCGAGAGCCTGATCCAGCC  
ATGCCGCGTGCGAGGAAGAAGGCCTTCTGGGTTGTAAACTGCTTTTGCCAGGGGATAAAAG  
ACCCGTGCGCGGGGAATTGAAGGTACCTGGTAAATAAGCCACGGCTAACTACGTGCCAGC  
AGCCGCGGTAATACGTAGGTGGCAAGCGTTGTCCGGATTTATTGGGTTTAAAGGGTGCGT  
AGGCGGCCCTGTAAGTCAGTGGTGAGATACGGCAGCTCAACTGTGAGGTGCCATTGATA  
CTGTAGGACTTGAGTACAGATGCCGTTGGCGGAATGTGTTCATGTAGCGGTGAAATGCATA  
GATATGACACAGAACACCGATTGCGAAGGCAGCTGACGAACTGTAAGTACGCTGAGGC  
TCGAAAGCGTGGGGATCAAACAGGATTAGATACCCGAGTAGTCC

>Otu31760

CCAGCCTATGGGGTGCAGCAGCCGAGAATATTCGACAATGGGCGAAAGCCTGATCGAGCG  
ATACCGCGTGGTGGATGAAGCGCTTCGGCGCGTAAACACCTTTTATGGGGGAGGAAGTTA  
TTGACGTTACCTCATGAATAAGGGGCTCCTAACTCTGTGCCAGCAGGAGCGGTAACACAG  
AGGCCCAAGCGTTACCCGGAATTACTGGGCGTAAAGAGTGCGTAGGTGGTCGTGTAGT  
CGTCCGTCAAAAACCCAGGGCTCAACCCTGGATCCGCGGGCGAAACGGCACGACTCGAGGG  
CGTGAGAGGTCTGTGAACTCTAGGTGTAGGGGTGAAATCCGTTGATATCTAGGGGAACA  
CCGAAAGCGAAGGCAACAGACTGGCGCGTTTCTGACGCTCAGGCGCGACAGCGTGGGGAT  
CAAACAGGATTAGATACCCTAGTAGTCC

>Otu31819

CCAGCCTATGGGTGGCAGCAGTGGGGAATCTTGACAATGGGGGAAACCCTGATGCAGCG  
ACGCCGCGTGAGCGGTGAAGCCCTTCGGGTGTAAAGCCCTGTTGGGTGGAAAGAAGGAA  
CCGGAGACGAATAATCTTTGGCTCTTGACGGTACCACCAGAGAAAGCACCGGCTAACTCC  
GTGCCAGTAGCCGCGTAATACGGAGGGTGCAAGCGTTGTTCCGAATTACTGGGCGTAA  
GGGCGCGTAGGTGGTTGCGTAAGTCGAATGTGAAATCCCCGGGCTTAACCCGGGAAGTGC  
ATCCGATACTGCGTGACTCGAGTGCAGCAGAGGGAAACGGAATTCCTGGTGTAGAGGTGA  
AATTCGTAGATATCAGGAGGAACACCGGTGGCGAAGGCGGTTTCCTGGGCTGACACTGAC  
ACTGAGGCGCGAAAGTGTGGGTAGCAAACAGGATTAGATACCCGTGTAGTCC

>Otu31829

CCAGCCTATGGGGCGCAGCAGTGGGGAATATTGGACAATGGGGGAAACCCTGATCCAGCG  
ACGCCGCGTGTGTGAAGAAGGCCTGCGGGTTGTAAAGCACTTTTAGTGGGGACAAAAAGC  
CATGGACTAATATTTCTGTGGTCTTGATTTAACCCAAAGAAAAAGCACCGGCTAACTCTGT  
GCCAGCAGCCGCGTAATACAGAGGGTGCAAACGTTGTTCCGAATTACTGGGCGTAAAGC  
GTGTGTAGGCGGTCTCGTAGGTCGGATGTGAAAGCCCTGGGCTCAACCCAGGAAGTGCAC  
TCGATACTGCGAGACTTGAGTATCGGAGAGGTTGGTAGAATTCTCGGTGTAGAGGTGAAA  
TTCGTAGATATCGAGAGGAATACCGGTGGCGAAAGCGGCCAACTGGACGAATACTGACGC  
TGAGACACGAAAGCGTGGGGAGCAAACAGGATTAGAGACCCCCGTAGTCC

>Otu31837

CCAGCCTACGGGGTGCACCAGTCGAGAATTTTTCTCAATGGGCGAAAGCCTGAAGGAGCG  
ACGCCGCGTGGGTGATGACGGCCTTCGGGTGTAAACCCCTGTCTTGCGAGAATAAGGCT  
GCAGGGTGAACAATCCTGCAGCTTGACTGTATCGCAGGAGGAAGACACGGCTAACTCTGT  
GCCAGCAGCCGCGTAATACAGAGGTGTCGAGCGTTGTCCGGAATTACTGGGCGTAAAGG  
GTGTGTAGGTGGGCGGGTAAGTCGGATGTGAAATCACTGGGCTTAACCCAGTAAGTGCAT  
CCGAAACTGCTCGTCTTGAGTGCAGAAGAGGAGAGTGGAATTCCTGGTGTAGCGGTGAAA  
TGCGTAGATATCGGGAGGAACACCAGTGGCGAAGGCGGCTCTCTGGTCTGCAACTGACAC  
TGAAACACGAAAGCTAGGGGAGCAAACGGGATTAGATACCCCCGTAGTCC

>Otu31855

CCAGCCTACGGGGCGCAGCAGTGGGGAATTTTTCGCAATGGGGGAAACCCTGACGCAGCA  
ACGCCGCGTGGAGGATGAAATCCCTTGGGATGTAAACTCCTTTTCGATCGGGAAGATAATG  
ACGGTACCAGAGAAGAAGCCCCGGCTAACTACGTGCCAGCAGCCGCGTAATACGTAGG  
GGGCAAGCGTTGTCCGGAATCATTTGGGCGTAAAGCGCGTGTAGGCGGCTCGATAAGTCTG  
CTGTGAAAGTCCAGGGCTCAACCCTGGAATGCCGGTGGATACTGTTGGGCTAGAGTACGG  
AAGAGGTGAGTGGAATTCCTGGTGTAGCGGTGAAATGCGCAGATATCAGGAGGAACACCA  
ATGGCGAAGGCAGCTCACTGGGACGTTACTGACGCTGAGACGCGAAAGCGTGGGGAGCAA  
ACAGGATTAGAAACCCTTGTAAGTCC

>Otu31918

CCAGCCTATGGGTTGCTGCAGTGGGGAATCTTGCGCAATGGGCGAAAGCCTGACGCAGCA  
ACGCCGCGTGAGGGACGAAGGCTTTCTGAGTTGTAAACCTCTTTTCGACAGGAACGATTGT  
GACGGTACCTGTAGAAGAAGCACCGGCCAACTATGTGCCAGCAGCCGCGGTGATACATAG  
GGTGAAGCGTTATTTCGGATTTATTGGGCGTAAAGAGCTCGTAGGCGGTTTCAGCAAGTCG



GGTGTTAAACCCCCAGGCTCAACCTGGGACGTGCATTTGAGACTGTGTTTCTTGAGTTTC  
GGAGAGGGTGGTGGAATTGCTGGTGTAGGAGTGACATCCGTAGAGATCAGCAGGAACACC  
GGGGGCGAAGGCGACCACCTGGCCGAATACTGACGCTGAGGAACGAAAGCGTGGGGAGCA  
AACAGGATTAGATACCCAGTAGTCC

>Otu31919

CCAGCCTTACGGGGTGCTGCAGTCGAGAATCTTCCACAATGGACGAAAGTCTGATGGAGC  
GACGCCGCGTGATTGATGAAGTCCCTCTGGGACGTAAAGATCTTTTATGAGGGAAGAAGT  
TTATTGACGGTACCTCATGAATAAGAGGCTCCTAATCTCGTGCCAGCAGGAGCGGTAATA  
CGAGAGCCTCGAGCGTTATCCGGAATTATTGGGCGTAAAGGGTGCGTAGGTTGTTCTGTT  
AGTCTTTTGTCAAAGCCCCGAGCTTAACTTGGGATATGCGGAAGAAACGGCAGAACTAGA  
AAGTGCGAGAGGTGTACGGAACCTCATGGTGTAGGGGTGAAATCCGTTGATATCATGGGGA  
ACACCTAAAGCGAAGGCAATATACTGGCGCACTCCTGACGCTGAGACACGAAAGCGTGGG  
AATCGAACGGGATTAGAAACCCCCGTAGTCC

>Otu31964

CCAGCCTACGGGGGGGACCAGTGGGGAATCTTGACACAATGGAGGAAACTCTGATGCAGCG  
ACGCCGCGTGAGCGATGAAGCCCTTCGGGGTGTAAGTTCTTTTCGGCAGGGAAGAATCAT  
GACGGTACCTGCAGAAGAAGCACCGGCCAACTACGTGCCAGCAGCCGCGGTGATACGTAG  
GGTGCAAGCGTTGTCCGGATTTATTGGGCGTAAAGAGCTCGTAGGCGGTTTGATTAGTCG  
GGTGTGAAACCTCCAGGCTTAGCCTGGAGCCGCCACTCGATACTGTCATGACTAGAAATTC  
GGTAGGGGACCACGGAATTCCTGGTGTAGCGGTGAAATGCGCAGATATCAGGAGGAACAC  
CAGCAGCGAAGGCGGTGGTCTGGGCCGACATTGACGCTGAGGAGCGAAAGCGTGGGGAGC  
GAACAGGATTAGAGACCCCTTGTAGTCC

>Otu31967

CCAGCCTATGGGGTGCTCCAGTGGGGAATCTTGACACAATGGAGGAAACTCTGATGCAGCG  
ACGCCGCGTGAGCGATGAAGCCCTTCGGGGTGTAAGCTCTTTTCGGTAGGGAAGATAATG  
ACGGTACCTACAGAAGCAGCTGCGGCTAACTACGTGCCAGCAGCCACGGTAATACGAAGG  
GTGCGAGCGTTGTTTCGGGATTACTGGGCGTAAAGGGTTTCGTAGGCGGGAATGCAAGTCAA  
GTGTGAAATCCCCAGGCTCAACCTGGGACGTGCATTTGAGACTGTGTTTCTTGAGTTTCG  
GAGAGGGTGGTGGAATTGCTGGTGTAGGAGTGACATCCGTAGAGATCAGCAGGAACACCG  
GAGGCGAAGGCGACCACCTGGCCGAATACTGACGCTGAGGAACGAAAGCGTGGGGAGCAA  
ACAGGATTAGAAACCCGCGTAGTCC

>Otu32011

CCAGCCTACGGGTGGCTGCAGTGGGGAATCTTGACACAATGGGGGCAACCCTGATCCAGCC  
ATGCCGCGTGGGTGATGAAGCTCTTCGGAGTGTAAGCCCTTTTCGGCAGGGAAGAGGAAA  
GACGGTACCTGCAAAAGAAGCCCCGGCTAACTACGTGCCAGCAGCCGCGGTAATACGTAG  
GGGGCAAGCGTTGTTTCGGAATTACTGGGCGTAAAGAGCGCGTAGGCGGCGCAGTGTGTTT  
GGTGTGAAATCTCCCGGCTCAACCGGGAGGGGGGCCATCGAACTGCTGTGCTTCGGGTAC  
GGGAGAGGGGAGTGGAATTCCCGGTGTAGCGGTGAAATGCGTAGAGATCGGGAGGAACAC  
CAGCGACGAAGGTGGCTCCCTGGACCGTTACCGACGCTGAGGCGCGAAAGCTAGGGGAGC  
AAACAGGATTAGAAACCCGCGTAGTCC

>Otu32031

CCAGCCTATGGGGGGGAGCAGTCGAGAATCTTCCGCAATGGACGAAAGTCTGACGGAGCG  
ACGTTACGTGAATGATGAAGCCCTTCGGGGTGTAAGTTCTTTTATGTATGAGGAAGGCG  
CAAGCCAGACAGTAATACATGAATAAGGGGATCCTAATTCTGTGCCAGCAGGAGCGGTAA  
TACAGAATCCCCAAGCGTTACCCGATTTATTGGGCGTAAAGGGTTTCGTAGGTGGTAAAG  
TAAGTTGAAAGTTAAAACTCATCGGCTTAACTTTGAGGTGCTTTCAATACTGCTATACT  
AGAGGATGTTAGGGGTAAACGGAACCGACGAGTAGGGGTGAAATCCGTTGATATCGTCG  
GGAACACCAAAAGCGAAGGCAGATAACTAGGACAATCCTGACACTGAGGAACGAAAGCGT  
GGGGAGCAAAAAGGATTAGAGACCCCCGTAGTCC

>Otu32048

CCAGCCTATGGGGTGCTCCAGTGGGGAATTTTGACACAGTGGGGGAAACCCTGATGCAGCA  
ACGCCGCGTGAGGATGAAGTCCCTTGGGATGTAACTCCTTTTCGACCGGGACGATAATG  
ACGGTACCGGTAGAAGAAGCCCCGGCTAACTCTGTGCCAGCAGCCGCGGTAATACAGAGG  
GGGCAAGCGTTGTTTCGGAATTATTGGGCGTAAAGGGTGCGTAGGCGGTGCGGTAAGTCTT  
TTGTGAAATCTACAGGCTCAACTTGTAGACTGCAAGGGGAACTGCCGGGCTTGAGTATGG  
GAGAGGTGAGTGGAATTCCTGGTGTAGCGGTGAAATGCGTAGATATCGGGAGGAACACCT  
GTGGTGAAGCGGCGCACTGGACCACTTCTGACGCTGATGCGCGAAAGCTAGGGGAGCAA  
ACAGGATTAGATACCCCTGTAGTCC

>Otu32053

CCAGCCTATGGGGGGCTGCAGTGGGGAATATTGGACAATGGGCGAAAGCCTGATCCAGCC  
ATGCCGCGTGTGTGAAGAAGGTCTTCGGATTGTAAAGCACTTTAAGTTGGGAGGAAGGGC  
ATGCACCTAATACGTGTGTGTCTTGACGTTACCGACAGAATAAGCACCGGCTAACTTCGT  
GCCAGCAGCCGCGGTAATACGAAGGGGGCTAGCGTTGTTTCGGAATCACTGGGCGTAAAGC  
GTACGCAGGCGGATTGATAAGTCAGGGGTGAAATCCCGGGGCTCAACCTCGGAATTGCCT  
TTGATACTGTCTGTCTTGAGTTCGGGAGAGGTTGGCGGAATTCCTAGTGTAGAGGTGAAA  
TTCGTAGATATTAGGAAGAACACCAGTGGCGAAGGCGGCCAACTGGCCCGACACTGACGC  
TCATGTGCGAAGGCGTGGGGAGCAAACAGGATTAGATAACCGTGTAGTCC

>Otu32093

CCAGCCTATGGGTCGCACCAGCACTTCCGCATCGTACTTCGAATGATCGGACAGCGTAAC  
GACAATCTTGTTGCTGCCGGCGAGCACGTGGTTGTTGGTGAGGATGCGGCCATCTTCGCC  
GAGGATCACGCCAGAGCCTGTTTCGCGCTGCGGCACGACTTGAAAGAACCAGTCGCGGCG  
GTACACAGTGCTGGTGATGTTGACCGTGGCCAGCCGGGCTGATTTGTAGATATCGATGTT  
GTTGTGTTTCGTCTGTACCGAGCCCGGCGCCGCGGGCCACAACCGGCTCACTCCAGGCCGG  
ATTTTGCTGCCCCGAACAGGGACTGGAACAGCCGCCGCGGACCTTCCGCAAAGGTGGTCAT  
GTACACGAAAGTACCGGCAAATACCGCCGACAAAATGAGATATCGAAATCGTCTCATAGC  
TTCTTAATTTGATTAGATAACCCAGTAGTCC

>Otu32095

CCAGCCTATGGGATGCACCAGTAGGGAATATTGCGCAATGGAGGAAACTCTGACGCAGCG  
ACGCCGCGTGGGTGATGAAGGCTTTCGGGTCGTAAAGCCCTGTCGGAAGGGAAGAAAAAC  
GTAGTGGCTAATATCCATTACGATTGACGGTACCTTTAGAGGAAGCACCGGCTAACTACG  
TGCCAGCAGCCGCGGTAATACGTAGGGTGCAAGCGTTGTTTCGGAATCATTTGGGCGTAAAG  
CGCGTGTAGGCGGTTAGACAAGTCAGATGTGAAAGCCCTGGGCTCAACCGAGGAAGTGCA  
TTTGAAACTGTCTGGCTAGAGGACGGTAGAGGAAGGTGGAATTCCAAGTGTAGAGGTGAA  
ATTCGTAGATATTTGGAGGAATACCGGTGGCGAAGGCGGCCTTCTGGGCCGATCCTAACG  
CTGAGACGCGAAAGCGTGGGGAGCAAACAGGATTAGAGACCCAGTAGTCC
